# Supplementary material for: Geographic and breed-specific traceability of cashmere via mineral element profiling in Inner Mongolia (Ordos, Chifeng, and Alxa League)
Source: Royal Society of Chemistry journal article supplement (doi:10.1039/d5ra08122j), 2026-01-01
Supplement: d5ra08122j1.zip [file 20210824-chi feng,ba lin you qi.pdf › ԭʼ޿/20210824-chi feng,ba lin you qi.pdf]

## Instrument Summary:

Instrument ID: iCAP Q  
Serial Number: Undefined

## Labbook Summary:

Path and filename: \_Application Data\Workspace\LabBooks\wlw\20210824-1.imexp  
Labbook created by: Administrator  
Based on template:  
Hardware configuration: iCAPQ1  
Labbook type: eQuant  
Qtegra version (last saved): 2.7.2425.154  
Labbook started: 8/24/2021 5:56:48 PM  
Labbook finished: 8/24/2021 6:34:57 PM

## Method Summary:

| Isotope | Mode | Dwell time (s) | # of Channels | Spacing | Resolution | IS |
|---------|------|----------------|---------------|---------|------------|----|
| 9Be     | STD  | 0.03           | 3             | 0.1     | Normal     |    |
| 11B     | STD  | 0.03           | 3             | 0.1     | Normal     |    |
| 23Na    | STD  | 0.03           | 3             | 0.1     | Normal     |    |
| 24Mg    | STD  | 0.03           | 3             | 0.1     | Normal     |    |
| 27Al    | STD  | 0.03           | 3             | 0.1     | Normal     |    |
| 31P     | STD  | 0.03           | 3             | 0.1     | Normal     |    |
| 32S     | STD  | 0.03           | 3             | 0.1     | Normal     |    |
| 39K     | STD  | 0.03           | 3             | 0.1     | Normal     |    |
| 40Ca    | STD  | 0.03           | 3             | 0.1     | Normal     |    |
| 51V     | STD  | 0.03           | 3             | 0.1     | Normal     |    |
| 52Cr    | STD  | 0.03           | 3             | 0.1     | Normal     |    |
| 55Mn    | STD  | 0.03           | 3             | 0.1     | Normal     |    |
| 56Fe    | STD  | 0.03           | 3             | 0.1     | Normal     |    |
| 58Ni    | STD  | 0.03           | 3             | 0.1     | Normal     |    |
| 59Co    | STD  | 0.03           | 3             | 0.1     | Normal     |    |
| 63Cu    | STD  | 0.03           | 3             | 0.1     | Normal     |    |
| 64Zn    | STD  | 0.03           | 3             | 0.1     | Normal     |    |
| 69Ga    | STD  | 0.03           | 3             | 0.1     | Normal     |    |
| 75As    | STD  | 0.03           | 3             | 0.1     | Normal     |    |
| 80Se    | STD  | 0.03           | 3             | 0.1     | Normal     |    |
| 85Rb    | STD  | 0.03           | 3             | 0.1     | Normal     |    |
| 88Sr    | STD  | 0.03           | 3             | 0.1     | Normal     |    |
| 107Ag   | STD  | 0.03           | 3             | 0.1     | Normal     |    |
| 114Cd   | STD  | 0.03           | 3             | 0.1     | Normal     |    |
| 133Cs   | STD  | 0.03           | 3             | 0.1     | Normal     |    |
| 138Ba   | STD  | 0.03           | 3             | 0.1     | Normal     |    |
| 139La   | STD  | 0.03           | 3             | 0.1     | Normal     |    |
| 140Ce   | STD  | 0.03           | 3             | 0.1     | Normal     |    |
| 141Pr   | STD  | 0.03           | 3             | 0.1     | Normal     |    |
| 142Nd   | STD  | 0.03           | 3             | 0.1     | Normal     |    |
| 152Sm   | STD  | 0.03           | 3             | 0.1     | Normal     |    |
| 153Eu   | STD  | 0.03           | 3             | 0.1     | Normal     |    |
| 158Gd   | STD  | 0.03           | 3             | 0.1     | Normal     |    |
| 164Dy   | STD  | 0.03           | 3             | 0.1     | Normal     |    |
| 165Ho   | STD  | 0.03           | 3             | 0.1     | Normal     |    |
| 166Er   | STD  | 0.03           | 3             | 0.1     | Normal     |    |
| 169Tm   | STD  | 0.03           | 3             | 0.1     | Normal     |    |
| 174Yb   | STD  | 0.03           | 3             | 0.1     | Normal     |    |
| 175Lu   | STD  | 0.03           | 3             | 0.1     | Normal     |    |
| 205Tl   | STD  | 0.03           | 3             | 0.1     | Normal     |    |
| 208Pb   | STD  | 0.03           | 3             | 0.1     | Normal     |    |
| 232Th   | STD  | 0.03           | 3             | 0.1     | Normal     |    |
| 238U    | STD  | 0.03           | 3             | 0.1     | Normal     |    |

| Isotope | Mode | Dwell time (s) | # of Channels | Spacing | Resolution |
|---------|------|----------------|---------------|---------|------------|
| 9Be     | STD  | 0.03           | 3             | 0.1     | Normal     |
| 11B     | STD  | 0.03           | 3             | 0.1     | Normal     |
| 23Na    | STD  | 0.03           | 3             | 0.1     | Normal     |
| 24Mg    | STD  | 0.03           | 3             | 0.1     | Normal     |
| 27Al    | STD  | 0.03           | 3             | 0.1     | Normal     |
| 31P     | STD  | 0.03           | 3             | 0.1     | Normal     |
| 32S     | STD  | 0.03           | 3             | 0.1     | Normal     |
| 39K     | STD  | 0.03           | 3             | 0.1     | Normal     |
| 40Ca    | STD  | 0.03           | 3             | 0.1     | Normal     |
| 51V     | STD  | 0.03           | 3             | 0.1     | Normal     |
| 52Cr    | STD  | 0.03           | 3             | 0.1     | Normal     |
| 55Mn    | STD  | 0.03           | 3             | 0.1     | Normal     |

| Isotope | Mode | Dwell time (s) | # of Channels | Spacing | Resolution |
|---------|------|----------------|---------------|---------|------------|
| 56Fe    | STD  | 0.03           | 3             | 0.1     | Normal     |
| 58Ni    | STD  | 0.03           | 3             | 0.1     | Normal     |
| 59Co    | STD  | 0.03           | 3             | 0.1     | Normal     |
| 63Cu    | STD  | 0.03           | 3             | 0.1     | Normal     |
| 64Zn    | STD  | 0.03           | 3             | 0.1     | Normal     |
| 69Ga    | STD  | 0.03           | 3             | 0.1     | Normal     |
| 75As    | STD  | 0.03           | 3             | 0.1     | Normal     |
| 80Se    | STD  | 0.03           | 3             | 0.1     | Normal     |
| 85Rb    | STD  | 0.03           | 3             | 0.1     | Normal     |
| 88Sr    | STD  | 0.03           | 3             | 0.1     | Normal     |
| 107Ag   | STD  | 0.03           | 3             | 0.1     | Normal     |
| 114Cd   | STD  | 0.03           | 3             | 0.1     | Normal     |
| 133Cs   | STD  | 0.03           | 3             | 0.1     | Normal     |
| 138Ba   | STD  | 0.03           | 3             | 0.1     | Normal     |
| 139La   | STD  | 0.03           | 3             | 0.1     | Normal     |
| 140Ce   | STD  | 0.03           | 3             | 0.1     | Normal     |
| 141Pr   | STD  | 0.03           | 3             | 0.1     | Normal     |
| 142Nd   | STD  | 0.03           | 3             | 0.1     | Normal     |
| 152Sm   | STD  | 0.03           | 3             | 0.1     | Normal     |
| 153Eu   | STD  | 0.03           | 3             | 0.1     | Normal     |
| 158Gd   | STD  | 0.03           | 3             | 0.1     | Normal     |
| 164Dy   | STD  | 0.03           | 3             | 0.1     | Normal     |
| 165Ho   | STD  | 0.03           | 3             | 0.1     | Normal     |
| 166Er   | STD  | 0.03           | 3             | 0.1     | Normal     |
| 169Tm   | STD  | 0.03           | 3             | 0.1     | Normal     |
| 174Yb   | STD  | 0.03           | 3             | 0.1     | Normal     |
| 175Lu   | STD  | 0.03           | 3             | 0.1     | Normal     |
| 205Tl   | STD  | 0.03           | 3             | 0.1     | Normal     |
| 208Pb   | STD  | 0.03           | 3             | 0.1     | Normal     |
| 232Th   | STD  | 0.03           | 3             | 0.1     | Normal     |
| 238U    | STD  | 0.03           | 3             | 0.1     | Normal     |

| No. of sweeps | Time per sweep[s] | Time per main run[s] |
|---------------|-------------------|----------------------|
| 10            | 3.87              | 38.7                 |

## Calibration Curves:

9Be

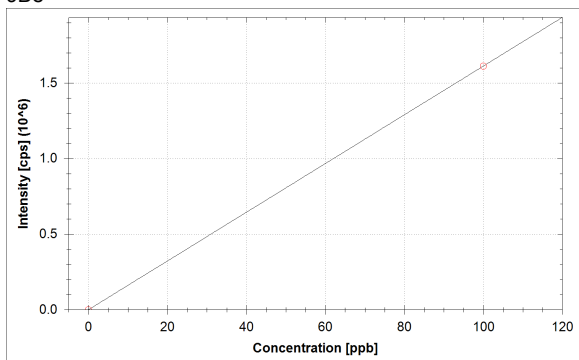

$$f(x) = 16123.6768 \cdot x + 76.6669$$

$$R^2 = 1.0000$$

$$\text{BEC} = 0.005 \text{ ppb}$$

$$\text{LoD} = \text{N/A}$$

11B

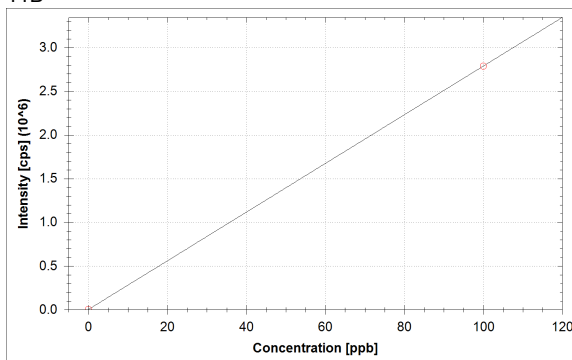

$$f(x) = 27855.2021 \cdot x + 2780.3150$$

$$R^2 = 1.0000$$

$$\text{BEC} = 0.100 \text{ ppb}$$

$$\text{LoD} = \text{N/A}$$

23Na

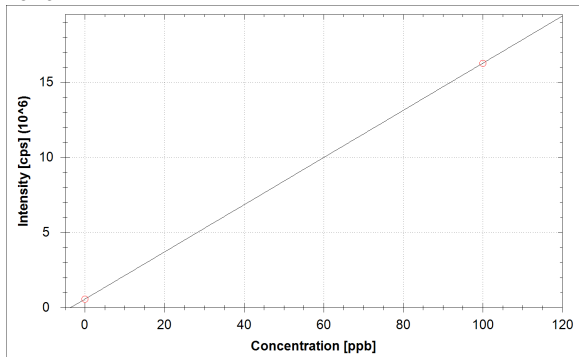

$$f(x) = 157187.7643 \cdot x + 558234.0064$$

$$R^2 = 1.0000$$

$$\text{BEC} = 3.551 \text{ ppb}$$

$$\text{LoD} = \text{N/A}$$

24Mg

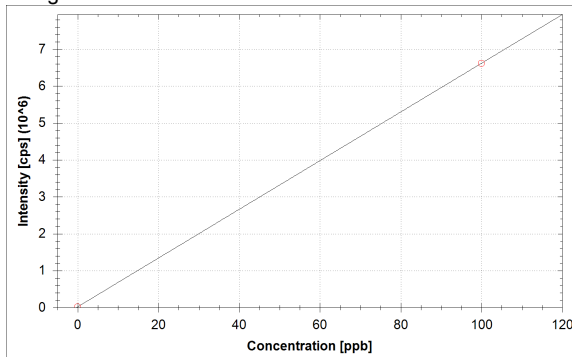

$$f(x) = 65981.0704 \cdot x + 21445.6064$$

$$R^2 = 1.0000$$

$$\text{BEC} = 0.325 \text{ ppb}$$

$$\text{LoD} = \text{N/A}$$

27Al

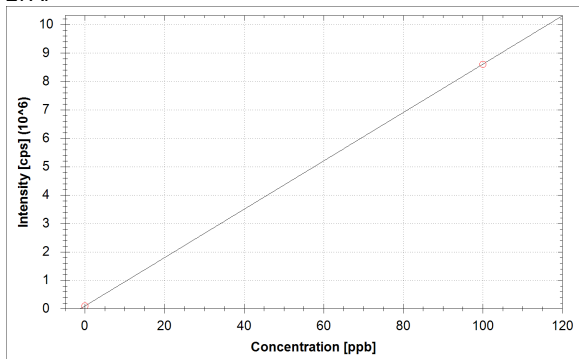

$$f(x) = 85155.9031 \cdot x + 87555.2887$$

$$R^2 = 1.0000$$

$$\text{BEC} = 1.028 \text{ ppb}$$

$$\text{LoD} = \text{N/A}$$

31P

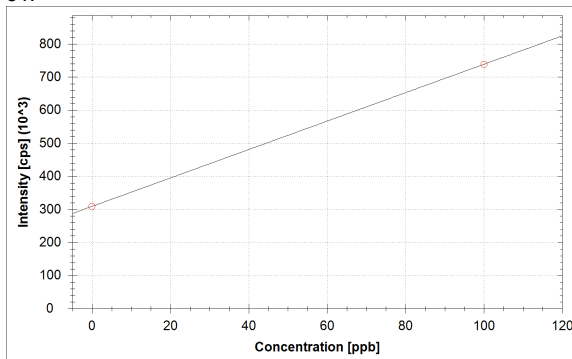

$$f(x) = 4298.0804 \cdot x + 309049.3184$$

$$R^2 = 1.0000$$

$$\text{BEC} = 71.904 \text{ ppb}$$

$$\text{LoD} = \text{N/A}$$

32S

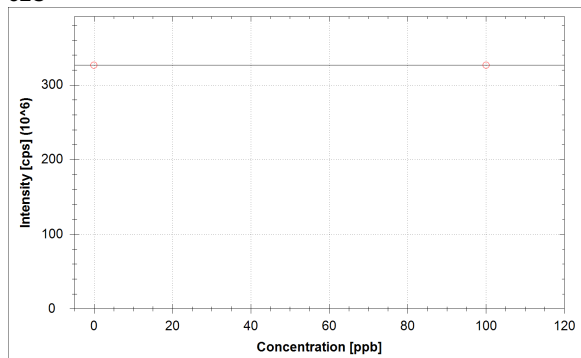

$$f(x) = 980.3035x + 326481139.4855$$

$$R^2 = 1.0000$$

$$\text{BEC} = 333040.891 \text{ ppb}$$

$$\text{LoD} = \text{N/A}$$

39K

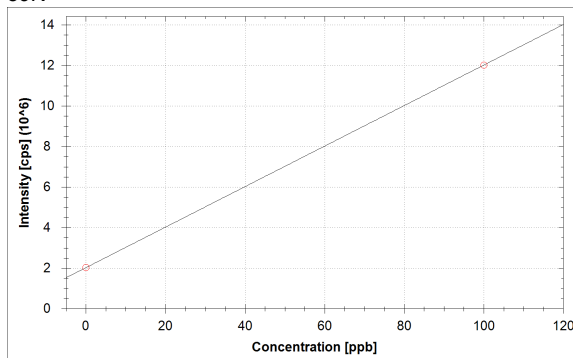

$$f(x) = 99916.0638x + 2024658.2299$$

$$R^2 = 1.0000$$

$$\text{BEC} = 20.264 \text{ ppb}$$

$$\text{LoD} = \text{N/A}$$

40Ca

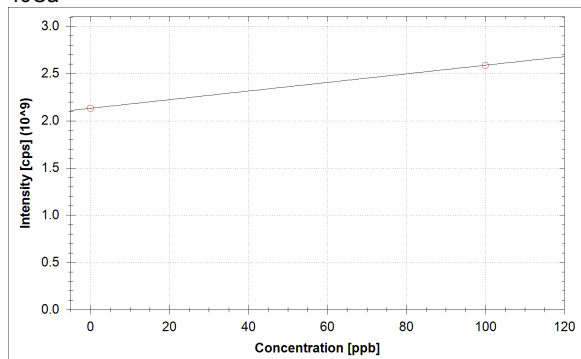

$$f(x) = 4562693.6177x + 2132145435.9794$$

$$R^2 = 1.0000$$

$$\text{BEC} = 467.300 \text{ ppb}$$

$$\text{LoD} = \text{N/A}$$

51V

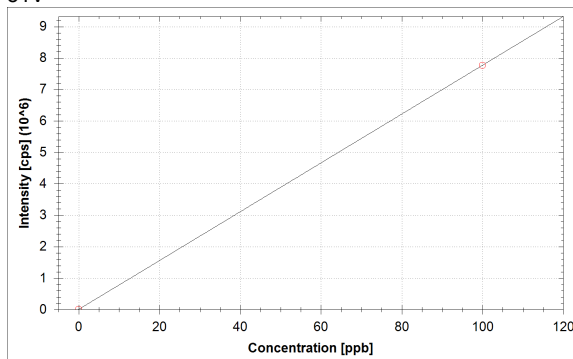

$$f(x) = 77660.5571x + 4844.2856$$

$$R^2 = 1.0000$$

$$\text{BEC} = 0.062 \text{ ppb}$$

$$\text{LoD} = \text{N/A}$$

52Cr

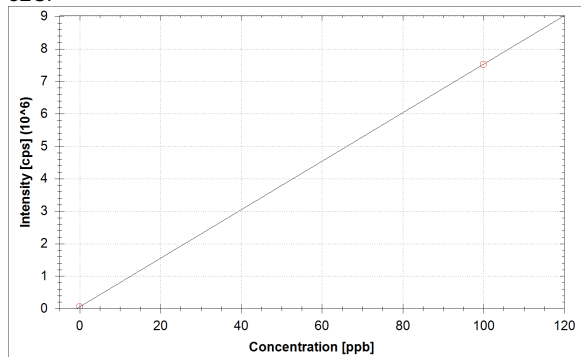

$$f(x) = 74735.7273x + 53300.3635$$

$$R^2 = 1.0000$$

$$\text{BEC} = 0.713 \text{ ppb}$$

$$\text{LoD} = \text{N/A}$$

55Mn

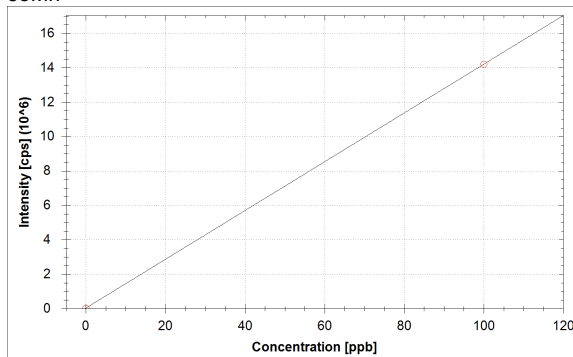

$$f(x) = 141731.5739x + 26956.1169$$

$$R^2 = 1.0000$$

$$\text{BEC} = 0.190 \text{ ppb}$$

$$\text{LoD} = \text{N/A}$$

**<sup>56</sup>Fe**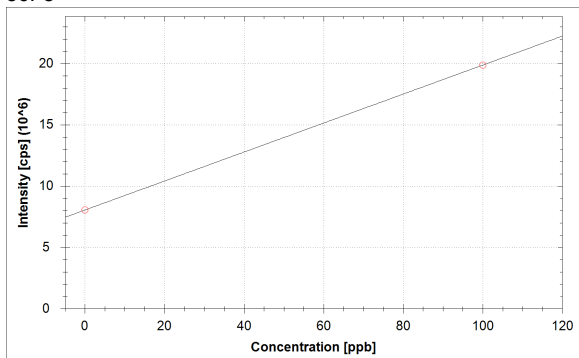

$$f(x) = 118230.8053 \cdot x + 8047198.1772$$

$$R^2 = 1.0000$$

$$\text{BEC} = 68.063 \text{ ppb}$$

$$\text{LoD} = \text{N/A}$$

**<sup>58</sup>Ni**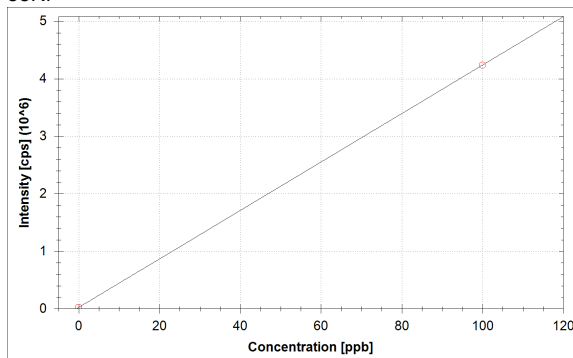

$$f(x) = 42154.0501 \cdot x + 22062.8064$$

$$R^2 = 1.0000$$

$$\text{BEC} = 0.523 \text{ ppb}$$

$$\text{LoD} = \text{N/A}$$

**<sup>59</sup>Co**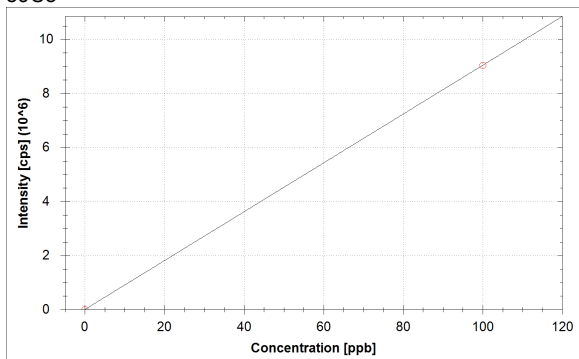

$$f(x) = 90408.0616 \cdot x + 2683.6280$$

$$R^2 = 1.0000$$

$$\text{BEC} = 0.030 \text{ ppb}$$

$$\text{LoD} = \text{N/A}$$

**<sup>63</sup>Cu**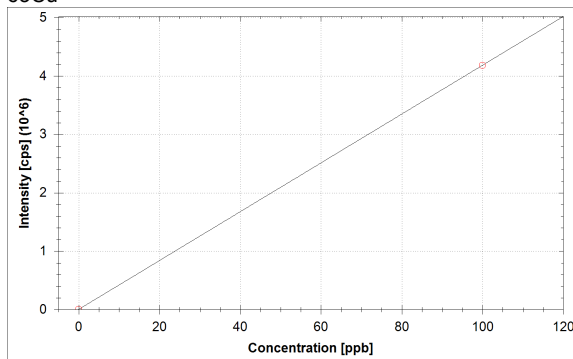

$$f(x) = 41812.1225 \cdot x + 3113.7336$$

$$R^2 = 1.0000$$

$$\text{BEC} = 0.074 \text{ ppb}$$

$$\text{LoD} = \text{N/A}$$

**<sup>64</sup>Zn**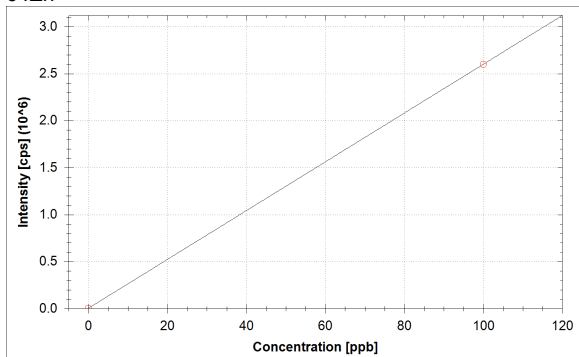

$$f(x) = 25965.0501 \cdot x + 3813.9330$$

$$R^2 = 1.0000$$

$$\text{BEC} = 0.147 \text{ ppb}$$

$$\text{LoD} = \text{N/A}$$

**<sup>69</sup>Ga**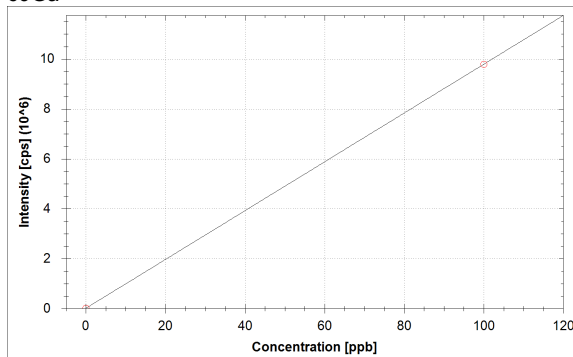

$$f(x) = 97802.3185 \cdot x + 10717.9602$$

$$R^2 = 1.0000$$

$$\text{BEC} = 0.110 \text{ ppb}$$

$$\text{LoD} = \text{N/A}$$

75As

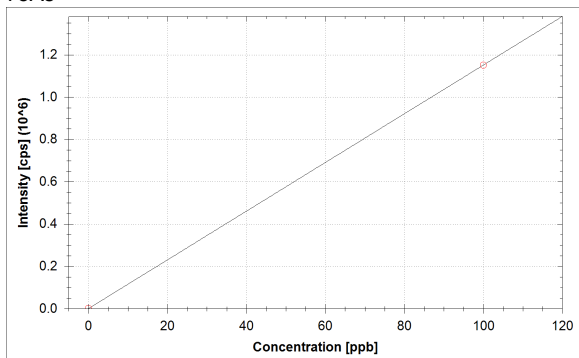

$$f(x) = 11505.6192 \cdot x + 636.6838$$

$$R^2 = 1.0000$$

$$\text{BEC} = 0.055 \text{ ppb}$$

$$\text{LoD} = \text{N/A}$$

80Se

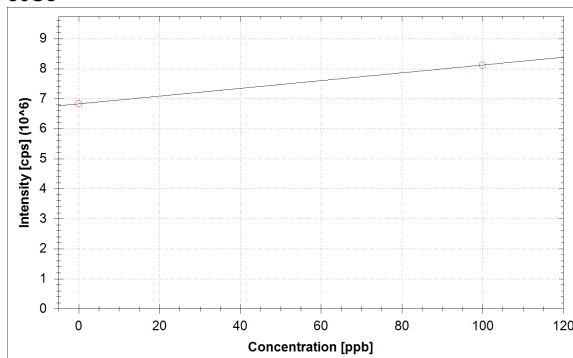

$$f(x) = 12943.5772 \cdot x + 6825136.7256$$

$$R^2 = 1.0000$$

$$\text{BEC} = 527.299 \text{ ppb}$$

$$\text{LoD} = \text{N/A}$$

85Rb

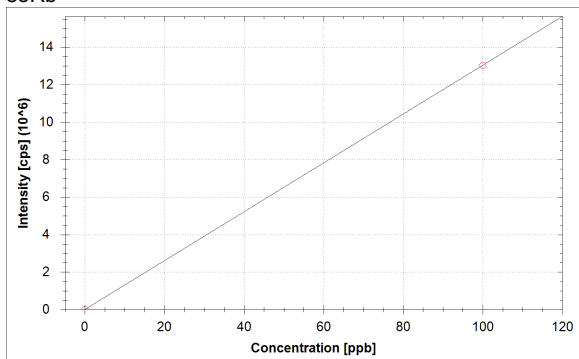

$$f(x) = 130327.4691 \cdot x + 2533.5957$$

$$R^2 = 1.0000$$

$$\text{BEC} = 0.019 \text{ ppb}$$

$$\text{LoD} = \text{N/A}$$

88Sr

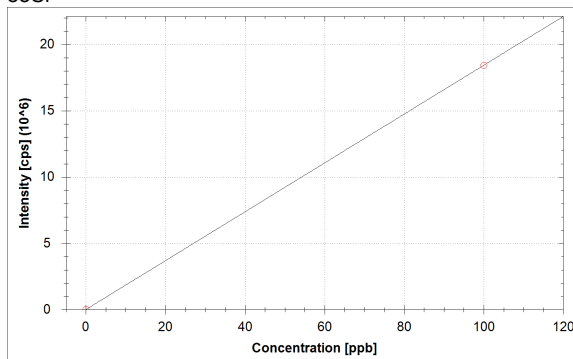

$$f(x) = 184308.8242 \cdot x + 1710.1251$$

$$R^2 = 1.0000$$

$$\text{BEC} = 0.009 \text{ ppb}$$

$$\text{LoD} = \text{N/A}$$

107Ag

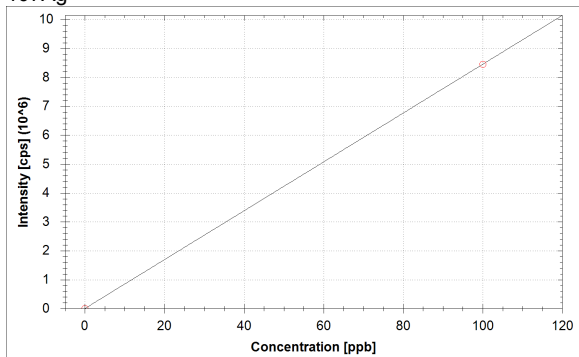

$$f(x) = 84518.0669 \cdot x + 1323.4043$$

$$R^2 = 1.0000$$

$$\text{BEC} = 0.016 \text{ ppb}$$

$$\text{LoD} = \text{N/A}$$

114Cd

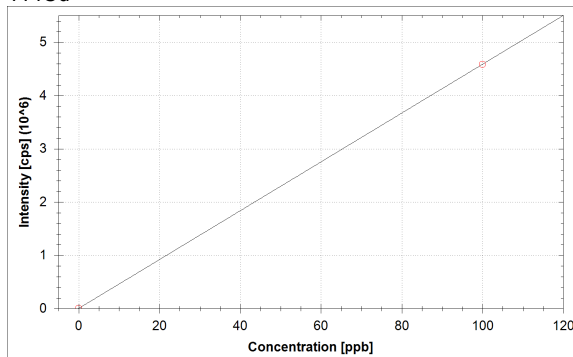

$$f(x) = 45859.0842 \cdot x + 2750.3058$$

$$R^2 = 1.0000$$

$$\text{BEC} = 0.060 \text{ ppb}$$

$$\text{LoD} = \text{N/A}$$

133Cs

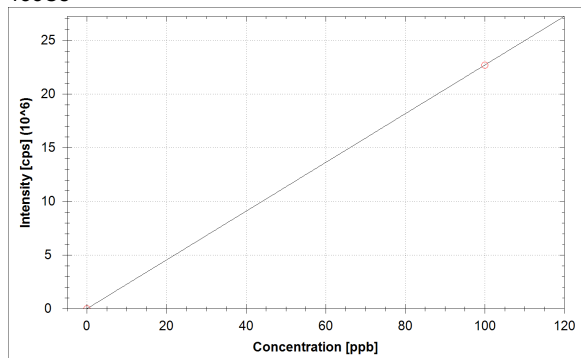

$$f(x) = 226890.3803 \cdot x + 163.3345$$

$$R^2 = 1.0000$$

$$\text{BEC} = 0.001 \text{ ppb}$$

$$\text{LoD} = \text{N/A}$$

138Ba

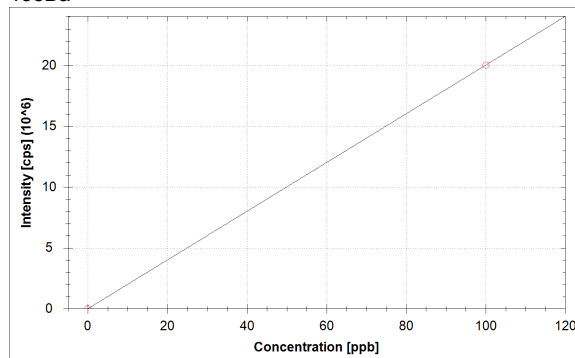

$$f(x) = 200296.5756 \cdot x + 4570.8635$$

$$R^2 = 1.0000$$

$$\text{BEC} = 0.023 \text{ ppb}$$

$$\text{LoD} = \text{N/A}$$

139La

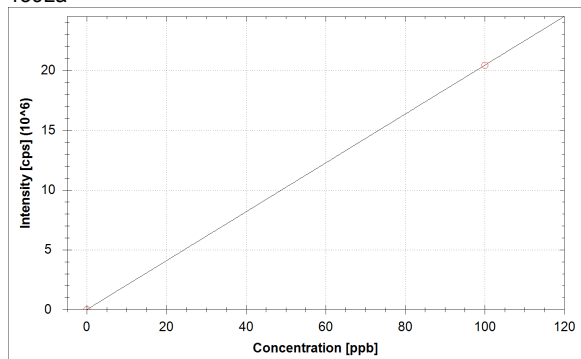

$$f(x) = 204369.2425 \cdot x + 126.6675$$

$$R^2 = 1.0000$$

$$\text{BEC} = 0.001 \text{ ppb}$$

$$\text{LoD} = \text{N/A}$$

140Ce

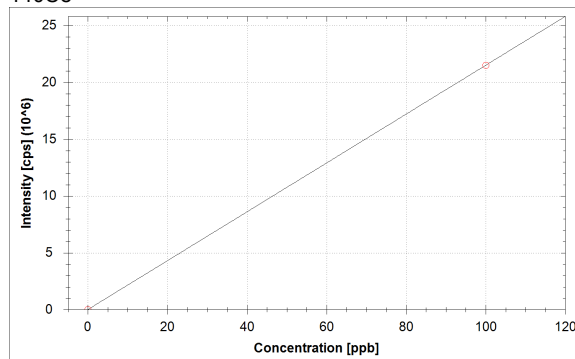

$$f(x) = 215090.2392 \cdot x + 290.0047$$

$$R^2 = 1.0000$$

$$\text{BEC} = 0.001 \text{ ppb}$$

$$\text{LoD} = \text{N/A}$$

141Pr

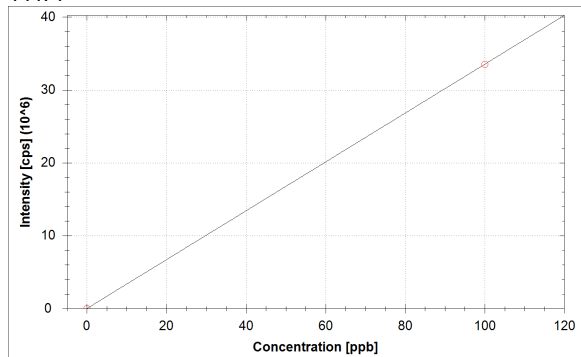

$$f(x) = 335221.0715 \cdot x + 96.6673$$

$$R^2 = 1.0000$$

$$\text{BEC} = 0.000 \text{ ppb}$$

$$\text{LoD} = \text{N/A}$$

142Nd

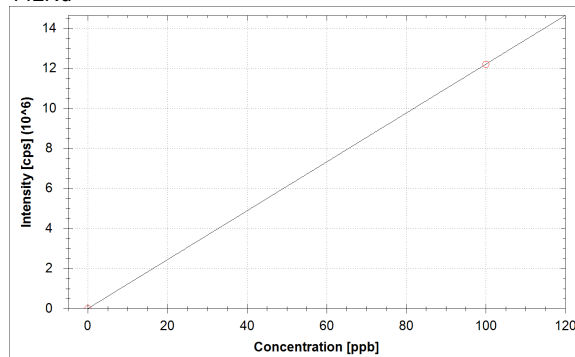

$$f(x) = 122019.3451 \cdot x + 113.3340$$

$$R^2 = 1.0000$$

$$\text{BEC} = 0.001 \text{ ppb}$$

$$\text{LoD} = \text{N/A}$$

**<sup>152</sup>Sm**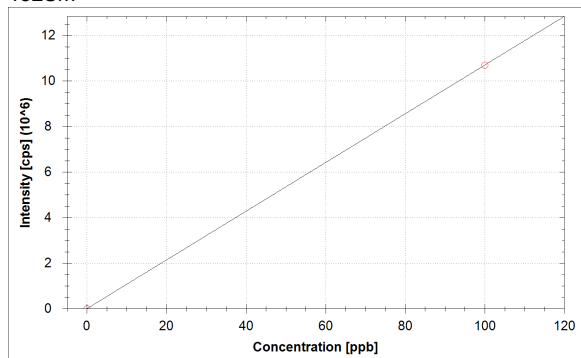

$$f(x) = 106956.3094 \cdot x + 33.3334$$

$$R^2 = 1.0000$$

$$\text{BEC} = 0.000 \text{ ppb}$$

$$\text{LoD} = \text{N/A}$$

**<sup>153</sup>Eu**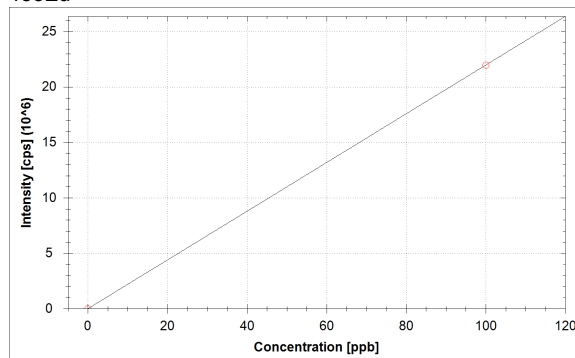

$$f(x) = 219705.1024 \cdot x + 30.0001$$

$$R^2 = 1.0000$$

$$\text{BEC} = 0.000 \text{ ppb}$$

$$\text{LoD} = \text{N/A}$$

**<sup>158</sup>Gd**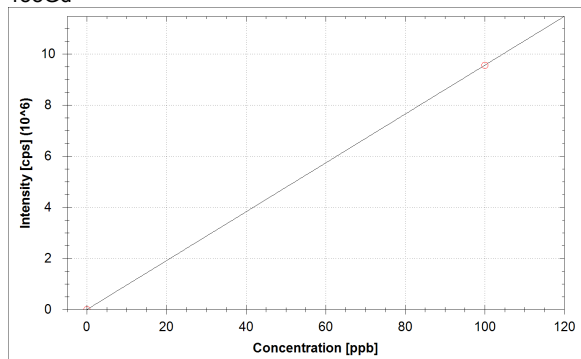

$$f(x) = 95611.1761 \cdot x + 13.3334$$

$$R^2 = 1.0000$$

$$\text{BEC} = 0.000 \text{ ppb}$$

$$\text{LoD} = \text{N/A}$$

**<sup>164</sup>Dy**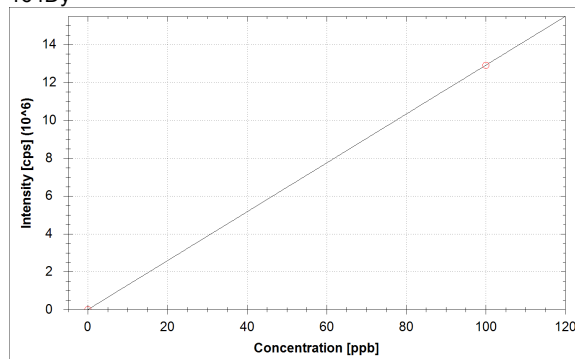

$$f(x) = 129090.6190 \cdot x + 3.3333$$

$$R^2 = 1.0000$$

$$\text{BEC} = 0.000 \text{ ppb}$$

$$\text{LoD} = \text{N/A}$$

**<sup>165</sup>Ho**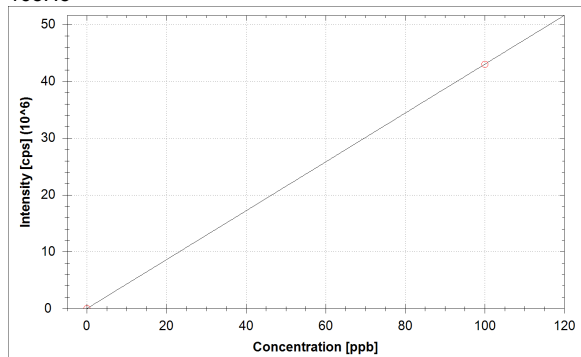

$$f(x) = 429782.8863 \cdot x + 126.6678$$

$$R^2 = 1.0000$$

$$\text{BEC} = 0.000 \text{ ppb}$$

$$\text{LoD} = \text{N/A}$$

**<sup>166</sup>Er**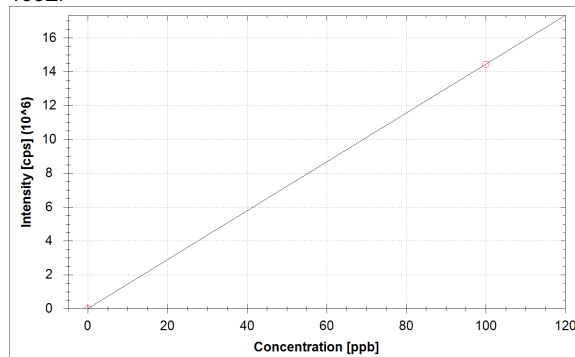

$$f(x) = 144383.7497 \cdot x + 6.6667$$

$$R^2 = 1.0000$$

$$\text{BEC} = 0.000 \text{ ppb}$$

$$\text{LoD} = \text{N/A}$$

169Tm

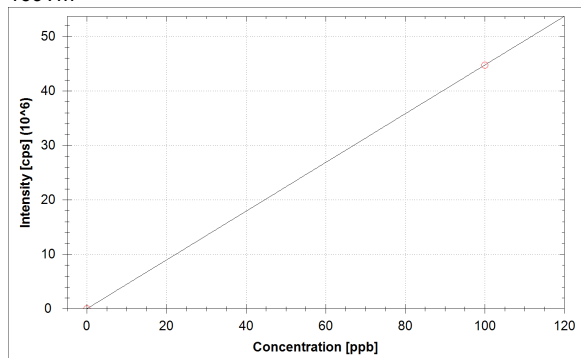

$$f(x) = 447354.4978 \cdot x + 23.3334$$

$$R^2 = 1.0000$$

$$\text{BEC} = 0.000 \text{ ppb}$$

$$\text{LoD} = \text{N/A}$$

174Yb

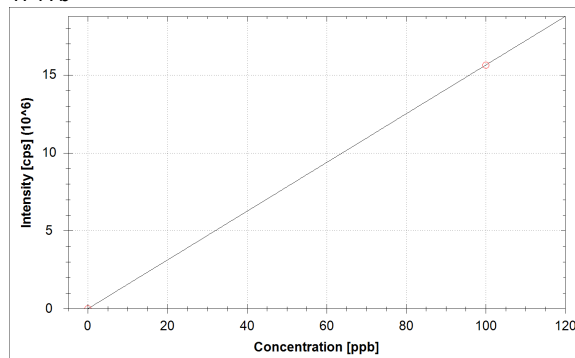

$$f(x) = 156327.6205 \cdot x + 3.3333$$

$$R^2 = 1.0000$$

$$\text{BEC} = 0.000 \text{ ppb}$$

$$\text{LoD} = \text{N/A}$$

175Lu

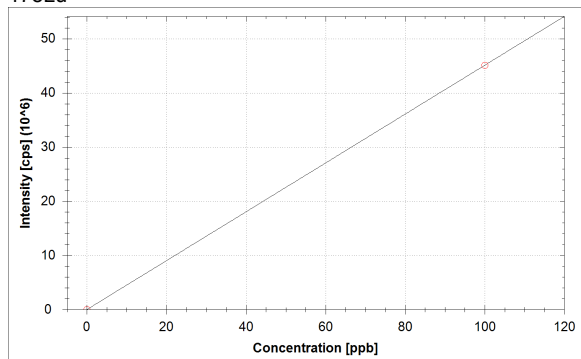

$$f(x) = 451122.3522 \cdot x + 10.0000$$

$$R^2 = 1.0000$$

$$\text{BEC} = 0.000 \text{ ppb}$$

$$\text{LoD} = \text{N/A}$$

205Tl

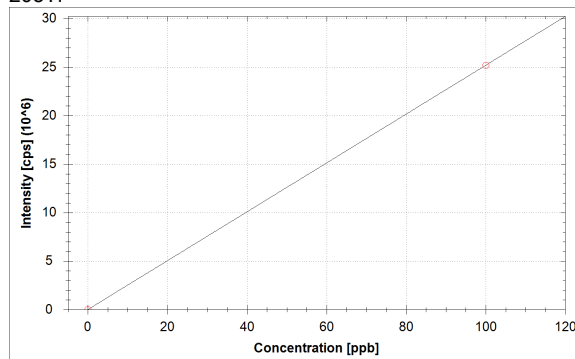

$$f(x) = 251934.2424 \cdot x + 56.6669$$

$$R^2 = 1.0000$$

$$\text{BEC} = 0.000 \text{ ppb}$$

$$\text{LoD} = \text{N/A}$$

208Pb

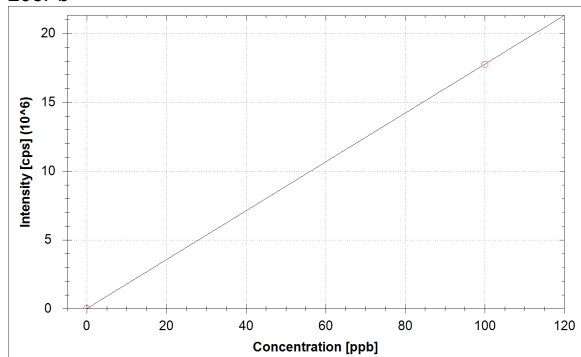

$$f(x) = 177609.1110 \cdot x + 2496.9262$$

$$R^2 = 1.0000$$

$$\text{BEC} = 0.014 \text{ ppb}$$

$$\text{LoD} = \text{N/A}$$

232Th

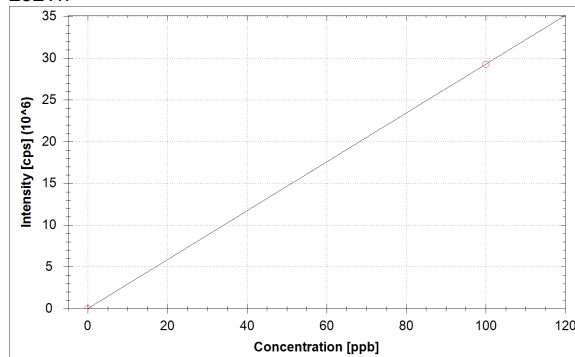

$$f(x) = 292772.4407 \cdot x + 370.0063$$

$$R^2 = 1.0000$$

$$\text{BEC} = 0.001 \text{ ppb}$$

$$\text{LoD} = \text{N/A}$$

238U

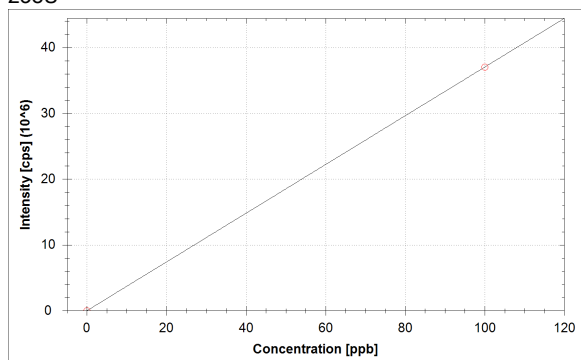

$$f(x) = 370239.0936 \cdot x + 466.6771$$

$$R^2 = 1.0000$$

$$\text{BEC} = 0.001 \text{ ppb}$$

$$\text{LoD} = \text{N/A}$$

**Standards:**

Analysis Index: 3  
 Analysis Name: std1  
 Analysis Type: STD  
 Analysis Started at: 8/24/2021 6:02:16 PM  
 Standard (Stock): std1  
 Standard DF: 1

| Category | Concentration average | Concentration RSD | Standard Concentration |
|----------|-----------------------|-------------------|------------------------|
| 9Be      | 100.000 ppb           |                   | 100.000 ppb            |
| 11B      | 100.000 ppb           |                   | 100.000 ppb            |
| 23Na     | 100.000 ppb           |                   | 100.000 ppb            |
| 24Mg     | 100.000 ppb           |                   | 100.000 ppb            |
| 27Al     | 100.000 ppb           |                   | 100.000 ppb            |
| 31P      | 100.000 ppb           |                   | 100.000 ppb            |
| 32S      | 100.000 ppb           |                   | 100.000 ppb            |
| 39K      | 100.000 ppb           |                   | 100.000 ppb            |
| 40Ca     | 100.000 ppb           |                   | 100.000 ppb            |
| 51V      | 100.000 ppb           |                   | 100.000 ppb            |
| 52Cr     | 100.000 ppb           |                   | 100.000 ppb            |
| 55Mn     | 100.000 ppb           |                   | 100.000 ppb            |
| 56Fe     | 100.000 ppb           |                   | 100.000 ppb            |
| 58Ni     | 100.000 ppb           |                   | 100.000 ppb            |
| 59Co     | 100.000 ppb           |                   | 100.000 ppb            |
| 63Cu     | 100.000 ppb           |                   | 100.000 ppb            |
| 64Zn     | 100.000 ppb           |                   | 100.000 ppb            |
| 69Ga     | 100.000 ppb           |                   | 100.000 ppb            |
| 75As     | 100.000 ppb           |                   | 100.000 ppb            |
| 80Se     | 100.000 ppb           |                   | 100.000 ppb            |
| 85Rb     | 100.000 ppb           |                   | 100.000 ppb            |
| 88Sr     | 100.000 ppb           |                   | 100.000 ppb            |
| 107Ag    | 100.000 ppb           |                   | 100.000 ppb            |
| 114Cd    | 100.000 ppb           |                   | 100.000 ppb            |
| 133Cs    | 100.000 ppb           |                   | 100.000 ppb            |
| 138Ba    | 100.000 ppb           |                   | 100.000 ppb            |
| 139La    | 100.000 ppb           |                   | 100.000 ppb            |
| 140Ce    | 100.000 ppb           |                   | 100.000 ppb            |
| 141Pr    | 100.000 ppb           |                   | 100.000 ppb            |
| 142Nd    | 100.000 ppb           |                   | 100.000 ppb            |
| 152Sm    | 100.000 ppb           |                   | 100.000 ppb            |
| 153Eu    | 100.000 ppb           |                   | 100.000 ppb            |
| 158Gd    | 100.000 ppb           |                   | 100.000 ppb            |
| 164Dy    | 100.000 ppb           |                   | 100.000 ppb            |
| 165Ho    | 100.000 ppb           |                   | 100.000 ppb            |
| 166Er    | 100.000 ppb           |                   | 100.000 ppb            |
| 169Tm    | 100.000 ppb           |                   | 100.000 ppb            |
| 174Yb    | 100.000 ppb           |                   | 100.000 ppb            |
| 175Lu    | 100.000 ppb           |                   | 100.000 ppb            |
| 205Tl    | 100.000 ppb           |                   | 100.000 ppb            |
| 208Pb    | 100.000 ppb           |                   | 100.000 ppb            |
| 232Th    | 100.000 ppb           |                   | 100.000 ppb            |
| 238U     | 100.000 ppb           |                   | 100.000 ppb            |

## Sample List Summary:

Instrument ID: iCAP Q

| Index: | Label:      | Main<br>Runs: | Survey<br>Runs: | Start Time:          | User name:                    |
|--------|-------------|---------------|-----------------|----------------------|-------------------------------|
| 1      | water       | 3             | 0               | 8/24/2021 5:56:53 PM | WINDOWS-UPCI4ER\Administrator |
| 2      | blk         | 1             | 0               | 8/24/2021 5:59:53 PM | WINDOWS-UPCI4ER\Administrator |
| 3      | std1        | 1             | 0               | 8/24/2021 6:02:16 PM | WINDOWS-UPCI4ER\Administrator |
| 4      | 15002ti     | 1             | 0               | 8/24/2021 6:04:57 PM | WINDOWS-UPCI4ER\Administrator |
| 5      | 15002jian   | 1             | 0               | 8/24/2021 6:07:16 PM | WINDOWS-UPCI4ER\Administrator |
| 6      | 15018ti     | 1             | 0               | 8/24/2021 6:09:06 PM | WINDOWS-UPCI4ER\Administrator |
| 7      | 15018jian   | 1             | 0               | 8/24/2021 6:11:03 PM | WINDOWS-UPCI4ER\Administrator |
| 8      | 15016ti     | 1             | 0               | 8/24/2021 6:13:00 PM | WINDOWS-UPCI4ER\Administrator |
| 9      | 15016jian   | 1             | 0               | 8/24/2021 6:14:58 PM | WINDOWS-UPCI4ER\Administrator |
| 10     | 15020jian   | 1             | 0               | 8/24/2021 6:16:49 PM | WINDOWS-UPCI4ER\Administrator |
| 11     | 15020ti     | 1             | 0               | 8/24/2021 6:18:41 PM | WINDOWS-UPCI4ER\Administrator |
| 12     | 15022jian   | 1             | 0               | 8/24/2021 6:20:32 PM | WINDOWS-UPCI4ER\Administrator |
| 13     | 15022ti     | 1             | 0               | 8/24/2021 6:22:20 PM | WINDOWS-UPCI4ER\Administrator |
| 14     | 1502713jian | 1             | 0               | 8/24/2021 6:24:07 PM | WINDOWS-UPCI4ER\Administrator |
| 15     | 1502713ti   | 1             | 0               | 8/24/2021 6:25:59 PM | WINDOWS-UPCI4ER\Administrator |
| 16     | 15026ti     | 1             | 0               | 8/24/2021 6:27:48 PM | WINDOWS-UPCI4ER\Administrator |
| 17     | 15026jian   | 1             | 0               | 8/24/2021 6:29:33 PM | WINDOWS-UPCI4ER\Administrator |
| 18     | 1502671jian | 1             | 0               | 8/24/2021 6:31:18 PM | WINDOWS-UPCI4ER\Administrator |
| 19     | 1502671ti   | 1             | 0               | 8/24/2021 6:33:07 PM | WINDOWS-UPCI4ER\Administrator |

## Sample Summary

Instrument ID: iCAP Q

Analysis index: 1

Analysis name: water

Analysis started at: 8/24/2021 5:56:53 PM

User name: WINDOWS-UPCI4ER\Administrator

| Category | Concentration average | Concentration RSD |
|----------|-----------------------|-------------------|
| 9Be      | 0.001 ppb             | 43.3 %            |
| 11B      | -0.021 ppb            | 12.4 %            |
| 23Na     | 0.995 ppb             | 6.4 %             |
| 24Mg     | -0.270 ppb            | 2.0 %             |
| 27Al     | -0.769 ppb            | 0.5 %             |
| 31P      | -59.212 ppb           | 0.7 %             |
| 32S      | -89,612.548 ppb       | 7.4 %             |
| 39K      | 0.657 ppb             | 40.0 %            |
| 40Ca     | 259.969 ppb           | 12.9 %            |
| 51V      | 0.015 ppb             | 17.6 %            |
| 52Cr     | 0.067 ppb             | 19.4 %            |
| 55Mn     | 0.017 ppb             | 24.4 %            |
| 56Fe     | -1.430 ppb            | 41.4 %            |
| 58Ni     | -0.029 ppb            | 25.5 %            |
| 59Co     | 0.006 ppb             | 37.1 %            |
| 63Cu     | -0.056 ppb            | 1.3 %             |
| 64Zn     | -0.041 ppb            | 21.5 %            |
| 69Ga     | 0.028 ppb             | 21.9 %            |
| 75As     | 0.013 ppb             | 22.2 %            |
| 80Se     | 121.511 ppb           | 14.0 %            |
| 85Rb     | 0.003 ppb             | 34.1 %            |
| 88Sr     | -0.007 ppb            | 4.0 %             |
| 107Ag    | -0.013 ppb            | 2.8 %             |
| 114Cd    | -0.058 ppb            | 1.1 %             |
| 133Cs    | 0.000 ppb             | 16.7 %            |
| 138Ba    | -0.021 ppb            | 0.8 %             |
| 139La    | 0.000 ppb             | 15.2 %            |
| 140Ce    | -0.001 ppb            | 2.0 %             |
| 141Pr    | 0.000 ppb             | 127.1 %           |
| 142Nd    | -0.001 ppb            | 3.8 %             |
| 152Sm    | 0.000 ppb             | 70.5 %            |
| 153Eu    | 0.000 ppb             | 264.6 %           |
| 158Gd    | 0.000 ppb             | 15.7 %            |
| 164Dy    | 0.000 ppb             | 86.6 %            |
| 165Ho    | 0.000 ppb             | 2.9 %             |
| 166Er    | 0.000 ppb             | 34.6 %            |
| 169Tm    | 0.000 ppb             | 96.5 %            |
| 174Yb    | 0.000 ppb             | 0.0 %             |
| 175Lu    | 0.000 ppb             | 24.7 %            |
| 205Tl    | 0.000 ppb             | 4.7 %             |
| 208Pb    | -0.013 ppb            | 0.7 %             |
| 232Th    | -0.001 ppb            | 0.5 %             |
| 238U     | -0.001 ppb            | 0.8 %             |

| Category | Concentration average | Intensity average | Intensity RSD |
|----------|-----------------------|-------------------|---------------|
| 9Be      | 0.001 ppb             | 90 cps            | 6.4 %         |
| 11B      | -0.021 ppb            | 2,209 cps         | 3.2 %         |
| 23Na     | 0.995 ppb             | 714,588 cps       | 1.4 %         |
| 24Mg     | -0.270 ppb            | 3,613 cps         | 9.7 %         |
| 27Al     | -0.769 ppb            | 22,088 cps        | 1.3 %         |

| Category | Concentration average | Intensity average | Intensity RSD |
|----------|-----------------------|-------------------|---------------|
| 31P      | -59.212 ppb           | 54,552 cps        | 3.3 %         |
| 32S      | -89,612.548 ppb       | 238,633,648 cps   | 2.7 %         |
| 39K      | 0.657 ppb             | 2,090,262 cps     | 1.3 %         |
| 40Ca     | 259.969 ppb           | 3,318,304,237 cps | 4.6 %         |
| 51V      | 0.015 ppb             | 6,019 cps         | 3.4 %         |
| 52Cr     | 0.067 ppb             | 58,288 cps        | 1.7 %         |
| 55Mn     | 0.017 ppb             | 29,323 cps        | 2.0 %         |
| 56Fe     | -1.430 ppb            | 7,878,177 cps     | 0.9 %         |
| 58Ni     | -0.029 ppb            | 20,847 cps        | 1.5 %         |
| 59Co     | 0.006 ppb             | 3,184 cps         | 5.8 %         |
| 63Cu     | -0.056 ppb            | 767 cps           | 3.9 %         |
| 64Zn     | -0.041 ppb            | 2,755 cps         | 8.3 %         |
| 69Ga     | 0.028 ppb             | 13,436 cps        | 4.4 %         |
| 75As     | 0.013 ppb             | 787 cps           | 4.2 %         |
| 80Se     | 121.511 ppb           | 8,397,922 cps     | 2.6 %         |
| 85Rb     | 0.003 ppb             | 2,907 cps         | 4.4 %         |
| 88Sr     | -0.007 ppb            | 344 cps           | 15.7 %        |
| 107Ag    | -0.013 ppb            | 261 cps           | 11.4 %        |
| 114Cd    | -0.058 ppb            | 71 cps            | 42.5 %        |
| 133Cs    | 0.000 ppb             | 103 cps           | 9.7 %         |
| 138Ba    | -0.021 ppb            | 379 cps           | 8.9 %         |
| 139La    | 0.000 ppb             | 28 cps            | 54.1 %        |
| 140Ce    | -0.001 ppb            | 7 cps             | 86.6 %        |
| 141Pr    | 0.000 ppb             | 82 cps            | 22.3 %        |
| 142Nd    | -0.001 ppb            | 12 cps            | 31.5 %        |
| 152Sm    | 0.000 ppb             | 19 cps            | 53.9 %        |
| 153Eu    | 0.000 ppb             | 27 cps            | 33.1 %        |
| 158Gd    | 0.000 ppb             | 1 cps             | 173.2 %       |
| 164Dy    | 0.000 ppb             | 1 cps             | 173.2 %       |
| 165Ho    | 0.000 ppb             | 13 cps            | 25.0 %        |
| 166Er    | 0.000 ppb             | 1 cps             | 173.2 %       |
| 169Tm    | 0.000 ppb             | 44 cps            | 45.8 %        |
| 174Yb    | 0.000 ppb             | 0 cps             |               |
| 175Lu    | 0.000 ppb             | 2 cps             | 86.6 %        |
| 205Tl    | 0.000 ppb             | 16 cps            | 12.4 %        |
| 208Pb    | -0.013 ppb            | 106 cps           | 16.2 %        |
| 232Th    | -0.001 ppb            | 1 cps             | 173.2 %       |
| 238U     | -0.001 ppb            | 4 cps             | 86.6 %        |

## Sample Summary

Instrument ID: iCAP Q

Analysis index: 2

Analysis name: blk

Analysis started at: 8/24/2021 5:59:53 PM

User name: WINDOWS-UPCI4ER\Administrator

| Category | Concentration average | Concentration RSD |
|----------|-----------------------|-------------------|
| 9Be      | 0.000 ppb             |                   |
| 11B      | 0.000 ppb             |                   |
| 23Na     | 0.000 ppb             |                   |
| 24Mg     | 0.000 ppb             |                   |
| 27Al     | 0.000 ppb             |                   |
| 31P      | 0.000 ppb             |                   |
| 32S      | 0.000 ppb             |                   |
| 39K      | 0.000 ppb             |                   |
| 40Ca     | 0.000 ppb             |                   |
| 51V      | 0.000 ppb             |                   |
| 52Cr     | 0.000 ppb             |                   |
| 55Mn     | 0.000 ppb             |                   |
| 56Fe     | 0.000 ppb             |                   |
| 58Ni     | 0.000 ppb             |                   |
| 59Co     | 0.000 ppb             |                   |
| 63Cu     | 0.000 ppb             |                   |
| 64Zn     | 0.000 ppb             |                   |
| 69Ga     | 0.000 ppb             |                   |
| 75As     | 0.000 ppb             |                   |
| 80Se     | 0.000 ppb             |                   |
| 85Rb     | 0.000 ppb             |                   |
| 88Sr     | 0.000 ppb             |                   |
| 107Ag    | 0.000 ppb             |                   |
| 114Cd    | 0.000 ppb             |                   |
| 133Cs    | 0.000 ppb             |                   |
| 138Ba    | 0.000 ppb             |                   |
| 139La    | 0.000 ppb             |                   |
| 140Ce    | 0.000 ppb             |                   |
| 141Pr    | 0.000 ppb             |                   |
| 142Nd    | 0.000 ppb             |                   |
| 152Sm    | 0.000 ppb             |                   |
| 153Eu    | 0.000 ppb             |                   |
| 158Gd    | 0.000 ppb             |                   |
| 164Dy    | 0.000 ppb             |                   |
| 165Ho    | 0.000 ppb             |                   |
| 166Er    | 0.000 ppb             |                   |
| 169Tm    | 0.000 ppb             |                   |
| 174Yb    | 0.000 ppb             |                   |
| 175Lu    | 0.000 ppb             |                   |
| 205Tl    | 0.000 ppb             |                   |
| 208Pb    | 0.000 ppb             |                   |
| 232Th    | 0.000 ppb             |                   |
| 238U     | 0.000 ppb             |                   |

| Category | Concentration average | Intensity average | Intensity RSD |
|----------|-----------------------|-------------------|---------------|
| 9Be      | 0.000 ppb             | 77 cps            |               |
| 11B      | 0.000 ppb             | 2,780 cps         |               |
| 23Na     | 0.000 ppb             | 558,234 cps       |               |
| 24Mg     | 0.000 ppb             | 21,446 cps        |               |
| 27Al     | 0.000 ppb             | 87,555 cps        |               |

| Category | Concentration average | Intensity average | Intensity RSD |
|----------|-----------------------|-------------------|---------------|
| 31P      | 0.000 ppb             | 309,049 cps       |               |
| 32S      | 0.000 ppb             | 326,481,139 cps   |               |
| 39K      | 0.000 ppb             | 2,024,658 cps     |               |
| 40Ca     | 0.000 ppb             | 2,132,145,436 cps |               |
| 51V      | 0.000 ppb             | 4,844 cps         |               |
| 52Cr     | 0.000 ppb             | 53,300 cps        |               |
| 55Mn     | 0.000 ppb             | 26,956 cps        |               |
| 56Fe     | 0.000 ppb             | 8,047,198 cps     |               |
| 58Ni     | 0.000 ppb             | 22,063 cps        |               |
| 59Co     | 0.000 ppb             | 2,684 cps         |               |
| 63Cu     | 0.000 ppb             | 3,114 cps         |               |
| 64Zn     | 0.000 ppb             | 3,814 cps         |               |
| 69Ga     | 0.000 ppb             | 10,718 cps        |               |
| 75As     | 0.000 ppb             | 637 cps           |               |
| 80Se     | 0.000 ppb             | 6,825,137 cps     |               |
| 85Rb     | 0.000 ppb             | 2,534 cps         |               |
| 88Sr     | 0.000 ppb             | 1,710 cps         |               |
| 107Ag    | 0.000 ppb             | 1,323 cps         |               |
| 114Cd    | 0.000 ppb             | 2,750 cps         |               |
| 133Cs    | 0.000 ppb             | 163 cps           |               |
| 138Ba    | 0.000 ppb             | 4,571 cps         |               |
| 139La    | 0.000 ppb             | 127 cps           |               |
| 140Ce    | 0.000 ppb             | 290 cps           |               |
| 141Pr    | 0.000 ppb             | 97 cps            |               |
| 142Nd    | 0.000 ppb             | 113 cps           |               |
| 152Sm    | 0.000 ppb             | 33 cps            |               |
| 153Eu    | 0.000 ppb             | 30 cps            |               |
| 158Gd    | 0.000 ppb             | 13 cps            |               |
| 164Dy    | 0.000 ppb             | 3 cps             |               |
| 165Ho    | 0.000 ppb             | 127 cps           |               |
| 166Er    | 0.000 ppb             | 7 cps             |               |
| 169Tm    | 0.000 ppb             | 23 cps            |               |
| 174Yb    | 0.000 ppb             | 3 cps             |               |
| 175Lu    | 0.000 ppb             | 10 cps            |               |
| 205Tl    | 0.000 ppb             | 57 cps            |               |
| 208Pb    | 0.000 ppb             | 2,497 cps         |               |
| 232Th    | 0.000 ppb             | 370 cps           |               |
| 238U     | 0.000 ppb             | 467 cps           |               |

## Sample Summary

Instrument ID: iCAP Q

Analysis index: 3

Analysis name: std1

Analysis started at: 8/24/2021 6:02:16 PM

User name: WINDOWS-UPCI4ER\Administrator

| Category | Concentration average | Concentration RSD |
|----------|-----------------------|-------------------|
| 9Be      | 100.000 ppb           |                   |
| 11B      | 100.000 ppb           |                   |
| 23Na     | 100.000 ppb           |                   |
| 24Mg     | 100.000 ppb           |                   |
| 27Al     | 100.000 ppb           |                   |
| 31P      | 100.000 ppb           |                   |
| 32S      | 100.000 ppb           |                   |
| 39K      | 100.000 ppb           |                   |
| 40Ca     | 100.000 ppb           |                   |
| 51V      | 100.000 ppb           |                   |
| 52Cr     | 100.000 ppb           |                   |
| 55Mn     | 100.000 ppb           |                   |
| 56Fe     | 100.000 ppb           |                   |
| 58Ni     | 100.000 ppb           |                   |
| 59Co     | 100.000 ppb           |                   |
| 63Cu     | 100.000 ppb           |                   |
| 64Zn     | 100.000 ppb           |                   |
| 69Ga     | 100.000 ppb           |                   |
| 75As     | 100.000 ppb           |                   |
| 80Se     | 100.000 ppb           |                   |
| 85Rb     | 100.000 ppb           |                   |
| 88Sr     | 100.000 ppb           |                   |
| 107Ag    | 100.000 ppb           |                   |
| 114Cd    | 100.000 ppb           |                   |
| 133Cs    | 100.000 ppb           |                   |
| 138Ba    | 100.000 ppb           |                   |
| 139La    | 100.000 ppb           |                   |
| 140Ce    | 100.000 ppb           |                   |
| 141Pr    | 100.000 ppb           |                   |
| 142Nd    | 100.000 ppb           |                   |
| 152Sm    | 100.000 ppb           |                   |
| 153Eu    | 100.000 ppb           |                   |
| 158Gd    | 100.000 ppb           |                   |
| 164Dy    | 100.000 ppb           |                   |
| 165Ho    | 100.000 ppb           |                   |
| 166Er    | 100.000 ppb           |                   |
| 169Tm    | 100.000 ppb           |                   |
| 174Yb    | 100.000 ppb           |                   |
| 175Lu    | 100.000 ppb           |                   |
| 205Tl    | 100.000 ppb           |                   |
| 208Pb    | 100.000 ppb           |                   |
| 232Th    | 100.000 ppb           |                   |
| 238U     | 100.000 ppb           |                   |

| Category | Concentration average | Intensity average | Intensity RSD |
|----------|-----------------------|-------------------|---------------|
| 9Be      | 100.000 ppb           | 1,612,444 cps     |               |
| 11B      | 100.000 ppb           | 2,788,301 cps     |               |
| 23Na     | 100.000 ppb           | 16,277,010 cps    |               |
| 24Mg     | 100.000 ppb           | 6,619,553 cps     |               |
| 27Al     | 100.000 ppb           | 8,603,146 cps     |               |

| Category | Concentration average | Intensity average | Intensity RSD |
|----------|-----------------------|-------------------|---------------|
| 31P      | 100.000 ppb           | 738,857 cps       |               |
| 32S      | 100.000 ppb           | 326,579,170 cps   |               |
| 39K      | 100.000 ppb           | 12,016,265 cps    |               |
| 40Ca     | 100.000 ppb           | 2,588,414,798 cps |               |
| 51V      | 100.000 ppb           | 7,770,900 cps     |               |
| 52Cr     | 100.000 ppb           | 7,526,873 cps     |               |
| 55Mn     | 100.000 ppb           | 14,200,114 cps    |               |
| 56Fe     | 100.000 ppb           | 19,870,279 cps    |               |
| 58Ni     | 100.000 ppb           | 4,237,468 cps     |               |
| 59Co     | 100.000 ppb           | 9,043,490 cps     |               |
| 63Cu     | 100.000 ppb           | 4,184,326 cps     |               |
| 64Zn     | 100.000 ppb           | 2,600,319 cps     |               |
| 69Ga     | 100.000 ppb           | 9,790,950 cps     |               |
| 75As     | 100.000 ppb           | 1,151,199 cps     |               |
| 80Se     | 100.000 ppb           | 8,119,494 cps     |               |
| 85Rb     | 100.000 ppb           | 13,035,281 cps    |               |
| 88Sr     | 100.000 ppb           | 18,432,593 cps    |               |
| 107Ag    | 100.000 ppb           | 8,453,130 cps     |               |
| 114Cd    | 100.000 ppb           | 4,588,659 cps     |               |
| 133Cs    | 100.000 ppb           | 22,689,201 cps    |               |
| 138Ba    | 100.000 ppb           | 20,034,228 cps    |               |
| 139La    | 100.000 ppb           | 20,437,051 cps    |               |
| 140Ce    | 100.000 ppb           | 21,509,314 cps    |               |
| 141Pr    | 100.000 ppb           | 33,522,204 cps    |               |
| 142Nd    | 100.000 ppb           | 12,202,048 cps    |               |
| 152Sm    | 100.000 ppb           | 10,695,664 cps    |               |
| 153Eu    | 100.000 ppb           | 21,970,540 cps    |               |
| 158Gd    | 100.000 ppb           | 9,561,131 cps     |               |
| 164Dy    | 100.000 ppb           | 12,909,065 cps    |               |
| 165Ho    | 100.000 ppb           | 42,978,415 cps    |               |
| 166Er    | 100.000 ppb           | 14,438,382 cps    |               |
| 169Tm    | 100.000 ppb           | 44,735,473 cps    |               |
| 174Yb    | 100.000 ppb           | 15,632,765 cps    |               |
| 175Lu    | 100.000 ppb           | 45,112,245 cps    |               |
| 205Tl    | 100.000 ppb           | 25,193,481 cps    |               |
| 208Pb    | 100.000 ppb           | 17,763,408 cps    |               |
| 232Th    | 100.000 ppb           | 29,277,614 cps    |               |
| 238U     | 100.000 ppb           | 37,024,376 cps    |               |

## Sample Summary

Instrument ID: iCAP Q

Analysis index: 4

Analysis name: 15002ti

Analysis started at: 8/24/2021 6:04:57 PM

User name: WINDOWS-UPCI4ER\Administrator

| Category | Concentration average | Concentration RSD |
|----------|-----------------------|-------------------|
| 9Be      | 0.036 ppb             |                   |
| 11B      | 22.564 ppb            |                   |
| 23Na     | 1,365.071 ppb         |                   |
| 24Mg     | 374.805 ppb           |                   |
| 27Al     | 204.079 ppb           |                   |
| 31P      | 372.887 ppb           |                   |
| 32S      | 308,283.605 ppb       |                   |
| 39K      | 3,341.229 ppb         |                   |
| 40Ca     | -140.671 ppb          |                   |
| 51V      | 0.635 ppb             |                   |
| 52Cr     | 1.562 ppb             |                   |
| 55Mn     | 9.499 ppb             |                   |
| 56Fe     | 209.139 ppb           |                   |
| 58Ni     | 5.623 ppb             |                   |
| 59Co     | 0.126 ppb             |                   |
| 63Cu     | 46.575 ppb            |                   |
| 64Zn     | 175.566 ppb           |                   |
| 69Ga     | 0.489 ppb             |                   |
| 75As     | 0.678 ppb             |                   |
| 80Se     | -118.000 ppb          |                   |
| 85Rb     | 2.290 ppb             |                   |
| 88Sr     | 7.699 ppb             |                   |
| 107Ag    | 0.903 ppb             |                   |
| 114Cd    | 0.210 ppb             |                   |
| 133Cs    | 0.050 ppb             |                   |
| 138Ba    | 17.535 ppb            |                   |
| 139La    | 0.206 ppb             |                   |
| 140Ce    | 0.405 ppb             |                   |
| 141Pr    | 0.051 ppb             |                   |
| 142Nd    | 0.250 ppb             |                   |
| 152Sm    | 0.047 ppb             |                   |
| 153Eu    | 0.011 ppb             |                   |
| 158Gd    | 0.072 ppb             |                   |
| 164Dy    | 0.037 ppb             |                   |
| 165Ho    | 0.005 ppb             |                   |
| 166Er    | 0.200 ppb             |                   |
| 169Tm    | 0.002 ppb             |                   |
| 174Yb    | 0.012 ppb             |                   |
| 175Lu    | 0.002 ppb             |                   |
| 205Tl    | 0.009 ppb             |                   |
| 208Pb    | 4.847 ppb             |                   |
| 232Th    | 0.157 ppb             |                   |
| 238U     | 0.033 ppb             |                   |

| Category | Concentration average | Intensity average | Intensity RSD |
|----------|-----------------------|-------------------|---------------|
| 9Be      | 0.036 ppb             | 653 cps           |               |
| 11B      | 22.564 ppb            | 631,307 cps       |               |
| 23Na     | 1,365.071 ppb         | 215,130,746 cps   |               |
| 24Mg     | 374.805 ppb           | 24,751,504 cps    |               |
| 27Al     | 204.079 ppb           | 17,466,079 cps    |               |

| Category | Concentration average | Intensity average | Intensity RSD |
|----------|-----------------------|-------------------|---------------|
| 31P      | 372.887 ppb           | 1,911,747 cps     |               |
| 32S      | 308,283.605 ppb       | 628,692,626 cps   |               |
| 39K      | 3,341.229 ppb         | 335,867,078 cps   |               |
| 40Ca     | -140.671 ppb          | 1,490,307,834 cps |               |
| 51V      | 0.635 ppb             | 54,171 cps        |               |
| 52Cr     | 1.562 ppb             | 170,049 cps       |               |
| 55Mn     | 9.499 ppb             | 1,373,207 cps     |               |
| 56Fe     | 209.139 ppb           | 32,773,890 cps    |               |
| 58Ni     | 5.623 ppb             | 259,097 cps       |               |
| 59Co     | 0.126 ppb             | 14,108 cps        |               |
| 63Cu     | 46.575 ppb            | 1,950,515 cps     |               |
| 64Zn     | 175.566 ppb           | 4,562,403 cps     |               |
| 69Ga     | 0.489 ppb             | 58,564 cps        |               |
| 75As     | 0.678 ppb             | 8,443 cps         |               |
| 80Se     | -118.000 ppb          | 5,297,797 cps     |               |
| 85Rb     | 2.290 ppb             | 300,985 cps       |               |
| 88Sr     | 7.699 ppb             | 1,420,777 cps     |               |
| 107Ag    | 0.903 ppb             | 77,607 cps        |               |
| 114Cd    | 0.210 ppb             | 12,369 cps        |               |
| 133Cs    | 0.050 ppb             | 11,459 cps        |               |
| 138Ba    | 17.535 ppb            | 3,516,765 cps     |               |
| 139La    | 0.206 ppb             | 42,182 cps        |               |
| 140Ce    | 0.405 ppb             | 87,366 cps        |               |
| 141Pr    | 0.051 ppb             | 17,172 cps        |               |
| 142Nd    | 0.250 ppb             | 30,618 cps        |               |
| 152Sm    | 0.047 ppb             | 5,061 cps         |               |
| 153Eu    | 0.011 ppb             | 2,547 cps         |               |
| 158Gd    | 0.072 ppb             | 6,879 cps         |               |
| 164Dy    | 0.037 ppb             | 4,754 cps         |               |
| 165Ho    | 0.005 ppb             | 2,384 cps         |               |
| 166Er    | 0.200 ppb             | 28,880 cps        |               |
| 169Tm    | 0.002 ppb             | 967 cps           |               |
| 174Yb    | 0.012 ppb             | 1,880 cps         |               |
| 175Lu    | 0.002 ppb             | 893 cps           |               |
| 205Tl    | 0.009 ppb             | 2,410 cps         |               |
| 208Pb    | 4.847 ppb             | 863,281 cps       |               |
| 232Th    | 0.157 ppb             | 46,363 cps        |               |
| 238U     | 0.033 ppb             | 12,720 cps        |               |

## Sample Summary

Instrument ID: iCAP Q

Analysis index: 5

Analysis name: 15002jian

Analysis started at: 8/24/2021 6:07:16 PM

User name: WINDOWS-UPCI4ER\Administrator

| Category | Concentration average | Concentration RSD |
|----------|-----------------------|-------------------|
| 9Be      | 0.015 ppb             |                   |
| 11B      | 14.715 ppb            |                   |
| 23Na     | 682.729 ppb           |                   |
| 24Mg     | 259.655 ppb           |                   |
| 27Al     | 182.347 ppb           |                   |
| 31P      | 395.224 ppb           |                   |
| 32S      | 339,012.415 ppb       |                   |
| 39K      | 2,622.610 ppb         |                   |
| 40Ca     | -167.340 ppb          |                   |
| 51V      | 0.554 ppb             |                   |
| 52Cr     | 1.441 ppb             |                   |
| 55Mn     | 6.556 ppb             |                   |
| 56Fe     | 153.740 ppb           |                   |
| 58Ni     | 2.427 ppb             |                   |
| 59Co     | 0.087 ppb             |                   |
| 63Cu     | 34.947 ppb            |                   |
| 64Zn     | 148.721 ppb           |                   |
| 69Ga     | 0.320 ppb             |                   |
| 75As     | 0.563 ppb             |                   |
| 80Se     | -64.544 ppb           |                   |
| 85Rb     | 2.096 ppb             |                   |
| 88Sr     | 4.264 ppb             |                   |
| 107Ag    | 0.401 ppb             |                   |
| 114Cd    | 0.156 ppb             |                   |
| 133Cs    | 0.041 ppb             |                   |
| 138Ba    | 11.728 ppb            |                   |
| 139La    | 0.190 ppb             |                   |
| 140Ce    | 0.346 ppb             |                   |
| 141Pr    | 0.055 ppb             |                   |
| 142Nd    | 0.274 ppb             |                   |
| 152Sm    | 0.035 ppb             |                   |
| 153Eu    | 0.008 ppb             |                   |
| 158Gd    | 0.063 ppb             |                   |
| 164Dy    | 0.033 ppb             |                   |
| 165Ho    | 0.020 ppb             |                   |
| 166Er    | 0.196 ppb             |                   |
| 169Tm    | 0.002 ppb             |                   |
| 174Yb    | 0.010 ppb             |                   |
| 175Lu    | 0.002 ppb             |                   |
| 205Tl    | 0.007 ppb             |                   |
| 208Pb    | 1.414 ppb             |                   |
| 232Th    | 0.074 ppb             |                   |
| 238U     | 0.018 ppb             |                   |

| Category | Concentration average | Intensity average | Intensity RSD |
|----------|-----------------------|-------------------|---------------|
| 9Be      | 0.015 ppb             | 317 cps           |               |
| 11B      | 14.715 ppb            | 412,661 cps       |               |
| 23Na     | 682.729 ppb           | 107,874,945 cps   |               |
| 24Mg     | 259.655 ppb           | 17,153,783 cps    |               |
| 27Al     | 182.347 ppb           | 15,615,455 cps    |               |

| Category | Concentration average | Intensity average | Intensity RSD |
|----------|-----------------------|-------------------|---------------|
| 31P      | 395.224 ppb           | 2,007,754 cps     |               |
| 32S      | 339,012.415 ppb       | 658,816,185 cps   |               |
| 39K      | 2,622.610 ppb         | 264,065,554 cps   |               |
| 40Ca     | -167.340 ppb          | 1,368,625,495 cps |               |
| 51V      | 0.554 ppb             | 47,855 cps        |               |
| 52Cr     | 1.441 ppb             | 160,996 cps       |               |
| 55Mn     | 6.556 ppb             | 956,181 cps       |               |
| 56Fe     | 153.740 ppb           | 26,224,030 cps    |               |
| 58Ni     | 2.427 ppb             | 124,367 cps       |               |
| 59Co     | 0.087 ppb             | 10,558 cps        |               |
| 63Cu     | 34.947 ppb            | 1,464,324 cps     |               |
| 64Zn     | 148.721 ppb           | 3,865,354 cps     |               |
| 69Ga     | 0.320 ppb             | 42,007 cps        |               |
| 75As     | 0.563 ppb             | 7,109 cps         |               |
| 80Se     | -64.544 ppb           | 5,989,713 cps     |               |
| 85Rb     | 2.096 ppb             | 275,698 cps       |               |
| 88Sr     | 4.264 ppb             | 787,569 cps       |               |
| 107Ag    | 0.401 ppb             | 35,186 cps        |               |
| 114Cd    | 0.156 ppb             | 9,904 cps         |               |
| 133Cs    | 0.041 ppb             | 9,434 cps         |               |
| 138Ba    | 11.728 ppb            | 2,353,716 cps     |               |
| 139La    | 0.190 ppb             | 39,045 cps        |               |
| 140Ce    | 0.346 ppb             | 74,784 cps        |               |
| 141Pr    | 0.055 ppb             | 18,444 cps        |               |
| 142Nd    | 0.274 ppb             | 33,565 cps        |               |
| 152Sm    | 0.035 ppb             | 3,784 cps         |               |
| 153Eu    | 0.008 ppb             | 1,887 cps         |               |
| 158Gd    | 0.063 ppb             | 5,991 cps         |               |
| 164Dy    | 0.033 ppb             | 4,271 cps         |               |
| 165Ho    | 0.020 ppb             | 8,593 cps         |               |
| 166Er    | 0.196 ppb             | 28,292 cps        |               |
| 169Tm    | 0.002 ppb             | 773 cps           |               |
| 174Yb    | 0.010 ppb             | 1,580 cps         |               |
| 175Lu    | 0.002 ppb             | 697 cps           |               |
| 205Tl    | 0.007 ppb             | 1,773 cps         |               |
| 208Pb    | 1.414 ppb             | 253,596 cps       |               |
| 232Th    | 0.074 ppb             | 21,923 cps        |               |
| 238U     | 0.018 ppb             | 7,229 cps         |               |

## Sample Summary

Instrument ID: iCAP Q

Analysis index: 6

Analysis name: 15018ti

Analysis started at: 8/24/2021 6:09:06 PM

User name: WINDOWS-UPCI4ER\Administrator

| Category | Concentration average | Concentration RSD |
|----------|-----------------------|-------------------|
| 9Be      | 0.033 ppb             |                   |
| 11B      | 21.483 ppb            |                   |
| 23Na     | 809.409 ppb           |                   |
| 24Mg     | 887.028 ppb           |                   |
| 27Al     | 758.712 ppb           |                   |
| 31P      | 597.361 ppb           |                   |
| 32S      | 429,260.525 ppb       |                   |
| 39K      | 4,236.759 ppb         |                   |
| 40Ca     | -38.646 ppb           |                   |
| 51V      | 1.741 ppb             |                   |
| 52Cr     | 2.319 ppb             |                   |
| 55Mn     | 26.332 ppb            |                   |
| 56Fe     | 659.685 ppb           |                   |
| 58Ni     | 14.149 ppb            |                   |
| 59Co     | 0.341 ppb             |                   |
| 63Cu     | 43.717 ppb            |                   |
| 64Zn     | 165.267 ppb           |                   |
| 69Ga     | 1.048 ppb             |                   |
| 75As     | 1.014 ppb             |                   |
| 80Se     | -19.622 ppb           |                   |
| 85Rb     | 3.754 ppb             |                   |
| 88Sr     | 14.535 ppb            |                   |
| 107Ag    | 0.244 ppb             |                   |
| 114Cd    | 0.332 ppb             |                   |
| 133Cs    | 0.159 ppb             |                   |
| 138Ba    | 25.972 ppb            |                   |
| 139La    | 0.684 ppb             |                   |
| 140Ce    | 1.382 ppb             |                   |
| 141Pr    | 0.182 ppb             |                   |
| 142Nd    | 0.889 ppb             |                   |
| 152Sm    | 0.156 ppb             |                   |
| 153Eu    | 0.031 ppb             |                   |
| 158Gd    | 0.237 ppb             |                   |
| 164Dy    | 0.101 ppb             |                   |
| 165Ho    | 0.017 ppb             |                   |
| 166Er    | 0.234 ppb             |                   |
| 169Tm    | 0.006 ppb             |                   |
| 174Yb    | 0.039 ppb             |                   |
| 175Lu    | 0.005 ppb             |                   |
| 205Tl    | 0.013 ppb             |                   |
| 208Pb    | 3.231 ppb             |                   |
| 232Th    | 0.162 ppb             |                   |
| 238U     | 0.058 ppb             |                   |

| Category | Concentration average | Intensity average | Intensity RSD |
|----------|-----------------------|-------------------|---------------|
| 9Be      | 0.033 ppb             | 603 cps           |               |
| 11B      | 21.483 ppb            | 601,201 cps       |               |
| 23Na     | 809.409 ppb           | 127,787,449 cps   |               |
| 24Mg     | 887.028 ppb           | 58,548,495 cps    |               |
| 27Al     | 758.712 ppb           | 64,696,366 cps    |               |

| Category | Concentration average | Intensity average | Intensity RSD |
|----------|-----------------------|-------------------|---------------|
| 31P      | 597.361 ppb           | 2,876,555 cps     |               |
| 32S      | 429,260.525 ppb       | 747,286,719 cps   |               |
| 39K      | 4,236.759 ppb         | 425,344,910 cps   |               |
| 40Ca     | -38.646 ppb           | 1,955,816,299 cps |               |
| 51V      | 1.741 ppb             | 140,085 cps       |               |
| 52Cr     | 2.319 ppb             | 226,644 cps       |               |
| 55Mn     | 26.332 ppb            | 3,759,036 cps     |               |
| 56Fe     | 659.685 ppb           | 86,042,286 cps    |               |
| 58Ni     | 14.149 ppb            | 618,519 cps       |               |
| 59Co     | 0.341 ppb             | 33,528 cps        |               |
| 63Cu     | 43.717 ppb            | 1,831,024 cps     |               |
| 64Zn     | 165.267 ppb           | 4,294,991 cps     |               |
| 69Ga     | 1.048 ppb             | 113,255 cps       |               |
| 75As     | 1.014 ppb             | 12,299 cps        |               |
| 80Se     | -19.622 ppb           | 6,571,154 cps     |               |
| 85Rb     | 3.754 ppb             | 491,771 cps       |               |
| 88Sr     | 14.535 ppb            | 2,680,642 cps     |               |
| 107Ag    | 0.244 ppb             | 21,949 cps        |               |
| 114Cd    | 0.332 ppb             | 17,976 cps        |               |
| 133Cs    | 0.159 ppb             | 36,149 cps        |               |
| 138Ba    | 25.972 ppb            | 5,206,651 cps     |               |
| 139La    | 0.684 ppb             | 139,888 cps       |               |
| 140Ce    | 1.382 ppb             | 297,614 cps       |               |
| 141Pr    | 0.182 ppb             | 61,217 cps        |               |
| 142Nd    | 0.889 ppb             | 108,574 cps       |               |
| 152Sm    | 0.156 ppb             | 16,674 cps        |               |
| 153Eu    | 0.031 ppb             | 6,949 cps         |               |
| 158Gd    | 0.237 ppb             | 22,668 cps        |               |
| 164Dy    | 0.101 ppb             | 13,064 cps        |               |
| 165Ho    | 0.017 ppb             | 7,422 cps         |               |
| 166Er    | 0.234 ppb             | 33,822 cps        |               |
| 169Tm    | 0.006 ppb             | 2,687 cps         |               |
| 174Yb    | 0.039 ppb             | 6,135 cps         |               |
| 175Lu    | 0.005 ppb             | 2,467 cps         |               |
| 205Tl    | 0.013 ppb             | 3,217 cps         |               |
| 208Pb    | 3.231 ppb             | 576,433 cps       |               |
| 232Th    | 0.162 ppb             | 47,882 cps        |               |
| 238U     | 0.058 ppb             | 21,879 cps        |               |

## Sample Summary

Instrument ID: iCAP Q

Analysis index: 7

Analysis name: 15018jian

Analysis started at: 8/24/2021 6:11:03 PM

User name: WINDOWS-UPCI4ER\Administrator

| Category | Concentration average | Concentration RSD |
|----------|-----------------------|-------------------|
| 9Be      | 0.023 ppb             |                   |
| 11B      | 13.408 ppb            |                   |
| 23Na     | 1,467.415 ppb         |                   |
| 24Mg     | 686.987 ppb           |                   |
| 27Al     | 638.559 ppb           |                   |
| 31P      | 606.873 ppb           |                   |
| 32S      | 562,105.054 ppb       |                   |
| 39K      | 7,363.446 ppb         |                   |
| 40Ca     | 65.666 ppb            |                   |
| 51V      | 1.538 ppb             |                   |
| 52Cr     | 2.180 ppb             |                   |
| 55Mn     | 18.566 ppb            |                   |
| 56Fe     | 555.736 ppb           |                   |
| 58Ni     | 7.418 ppb             |                   |
| 59Co     | 0.295 ppb             |                   |
| 63Cu     | 42.086 ppb            |                   |
| 64Zn     | 181.280 ppb           |                   |
| 69Ga     | 0.792 ppb             |                   |
| 75As     | 1.077 ppb             |                   |
| 80Se     | 46.551 ppb            |                   |
| 85Rb     | 5.501 ppb             |                   |
| 88Sr     | 9.085 ppb             |                   |
| 107Ag    | 0.816 ppb             |                   |
| 114Cd    | 0.328 ppb             |                   |
| 133Cs    | 0.130 ppb             |                   |
| 138Ba    | 15.998 ppb            |                   |
| 139La    | 0.522 ppb             |                   |
| 140Ce    | 1.069 ppb             |                   |
| 141Pr    | 0.155 ppb             |                   |
| 142Nd    | 0.725 ppb             |                   |
| 152Sm    | 0.113 ppb             |                   |
| 153Eu    | 0.024 ppb             |                   |
| 158Gd    | 0.228 ppb             |                   |
| 164Dy    | 0.085 ppb             |                   |
| 165Ho    | 0.013 ppb             |                   |
| 166Er    | 0.153 ppb             |                   |
| 169Tm    | 0.005 ppb             |                   |
| 174Yb    | 0.033 ppb             |                   |
| 175Lu    | 0.004 ppb             |                   |
| 205Tl    | 0.010 ppb             |                   |
| 208Pb    | 3.193 ppb             |                   |
| 232Th    | 0.126 ppb             |                   |
| 238U     | 0.034 ppb             |                   |

| Category | Concentration average | Intensity average | Intensity RSD |
|----------|-----------------------|-------------------|---------------|
| 9Be      | 0.023 ppb             | 453 cps           |               |
| 11B      | 13.408 ppb            | 376,257 cps       |               |
| 23Na     | 1,467.415 ppb         | 231,217,862 cps   |               |
| 24Mg     | 686.987 ppb           | 45,349,554 cps    |               |
| 27Al     | 638.559 ppb           | 54,464,643 cps    |               |

| Category | Concentration average | Intensity average | Intensity RSD |
|----------|-----------------------|-------------------|---------------|
| 31P      | 606.873 ppb           | 2,917,437 cps     |               |
| 32S      | 562,105.054 ppb       | 877,514,671 cps   |               |
| 39K      | 7,363.446 ppb         | 737,751,223 cps   |               |
| 40Ca     | 65.666 ppb            | 2,431,759,409 cps |               |
| 51V      | 1.538 ppb             | 124,284 cps       |               |
| 52Cr     | 2.180 ppb             | 216,254 cps       |               |
| 55Mn     | 18.566 ppb            | 2,658,284 cps     |               |
| 56Fe     | 555.736 ppb           | 73,752,338 cps    |               |
| 58Ni     | 7.418 ppb             | 334,771 cps       |               |
| 59Co     | 0.295 ppb             | 29,358 cps        |               |
| 63Cu     | 42.086 ppb            | 1,762,827 cps     |               |
| 64Zn     | 181.280 ppb           | 4,710,750 cps     |               |
| 69Ga     | 0.792 ppb             | 88,174 cps        |               |
| 75As     | 1.077 ppb             | 13,033 cps        |               |
| 80Se     | 46.551 ppb            | 7,427,673 cps     |               |
| 85Rb     | 5.501 ppb             | 719,447 cps       |               |
| 88Sr     | 9.085 ppb             | 1,676,147 cps     |               |
| 107Ag    | 0.816 ppb             | 70,318 cps        |               |
| 114Cd    | 0.328 ppb             | 17,776 cps        |               |
| 133Cs    | 0.130 ppb             | 29,578 cps        |               |
| 138Ba    | 15.998 ppb            | 3,208,935 cps     |               |
| 139La    | 0.522 ppb             | 106,711 cps       |               |
| 140Ce    | 1.069 ppb             | 230,219 cps       |               |
| 141Pr    | 0.155 ppb             | 52,035 cps        |               |
| 142Nd    | 0.725 ppb             | 88,615 cps        |               |
| 152Sm    | 0.113 ppb             | 12,069 cps        |               |
| 153Eu    | 0.024 ppb             | 5,254 cps         |               |
| 158Gd    | 0.228 ppb             | 21,799 cps        |               |
| 164Dy    | 0.085 ppb             | 10,975 cps        |               |
| 165Ho    | 0.013 ppb             | 5,678 cps         |               |
| 166Er    | 0.153 ppb             | 22,036 cps        |               |
| 169Tm    | 0.005 ppb             | 2,230 cps         |               |
| 174Yb    | 0.033 ppb             | 5,214 cps         |               |
| 175Lu    | 0.004 ppb             | 1,983 cps         |               |
| 205Tl    | 0.010 ppb             | 2,647 cps         |               |
| 208Pb    | 3.193 ppb             | 569,617 cps       |               |
| 232Th    | 0.126 ppb             | 37,279 cps        |               |
| 238U     | 0.034 ppb             | 12,980 cps        |               |

## Sample Summary

Instrument ID: iCAP Q

Analysis index: 8

Analysis name: 15016ti

Analysis started at: 8/24/2021 6:13:00 PM

User name: WINDOWS-UPCI4ER\Administrator

| Category | Concentration average | Concentration RSD |
|----------|-----------------------|-------------------|
| 9Be      | 0.013 ppb             |                   |
| 11B      | 23.885 ppb            |                   |
| 23Na     | 729.712 ppb           |                   |
| 24Mg     | 631.714 ppb           |                   |
| 27Al     | 425.982 ppb           |                   |
| 31P      | 586.196 ppb           |                   |
| 32S      | 557,028.571 ppb       |                   |
| 39K      | 3,351.449 ppb         |                   |
| 40Ca     | 480.521 ppb           |                   |
| 51V      | 1.174 ppb             |                   |
| 52Cr     | 2.130 ppb             |                   |
| 55Mn     | 16.570 ppb            |                   |
| 56Fe     | 349.825 ppb           |                   |
| 58Ni     | 6.592 ppb             |                   |
| 59Co     | 0.247 ppb             |                   |
| 63Cu     | 79.145 ppb            |                   |
| 64Zn     | 169.096 ppb           |                   |
| 69Ga     | 1.104 ppb             |                   |
| 75As     | 0.902 ppb             |                   |
| 80Se     | 175.817 ppb           |                   |
| 85Rb     | 2.243 ppb             |                   |
| 88Sr     | 9.707 ppb             |                   |
| 107Ag    | 0.468 ppb             |                   |
| 114Cd    | 0.220 ppb             |                   |
| 133Cs    | 0.067 ppb             |                   |
| 138Ba    | 21.164 ppb            |                   |
| 139La    | 0.292 ppb             |                   |
| 140Ce    | 0.544 ppb             |                   |
| 141Pr    | 0.123 ppb             |                   |
| 142Nd    | 0.406 ppb             |                   |
| 152Sm    | 0.064 ppb             |                   |
| 153Eu    | 0.016 ppb             |                   |
| 158Gd    | 0.098 ppb             |                   |
| 164Dy    | 0.049 ppb             |                   |
| 165Ho    | 0.006 ppb             |                   |
| 166Er    | 0.183 ppb             |                   |
| 169Tm    | 0.003 ppb             |                   |
| 174Yb    | 0.015 ppb             |                   |
| 175Lu    | 0.002 ppb             |                   |
| 205Tl    | 0.007 ppb             |                   |
| 208Pb    | 4.015 ppb             |                   |
| 232Th    | 0.066 ppb             |                   |
| 238U     | 0.024 ppb             |                   |

| Category | Concentration average | Intensity average | Intensity RSD |
|----------|-----------------------|-------------------|---------------|
| 9Be      | 0.013 ppb             | 293 cps           |               |
| 11B      | 23.885 ppb            | 668,100 cps       |               |
| 23Na     | 729.712 ppb           | 115,260,031 cps   |               |
| 24Mg     | 631.714 ppb           | 41,702,625 cps    |               |
| 27Al     | 425.982 ppb           | 36,362,427 cps    |               |

| Category | Concentration average | Intensity average | Intensity RSD |
|----------|-----------------------|-------------------|---------------|
| 31P      | 586.196 ppb           | 2,828,566 cps     |               |
| 32S      | 557,028.571 ppb       | 872,538,178 cps   |               |
| 39K      | 3,351.449 ppb         | 336,888,246 cps   |               |
| 40Ca     | 480.521 ppb           | 4,324,614,581 cps |               |
| 51V      | 1.174 ppb             | 96,001 cps        |               |
| 52Cr     | 2.130 ppb             | 212,472 cps       |               |
| 55Mn     | 16.570 ppb            | 2,375,427 cps     |               |
| 56Fe     | 349.825 ppb           | 49,407,244 cps    |               |
| 58Ni     | 6.592 ppb             | 299,933 cps       |               |
| 59Co     | 0.247 ppb             | 25,024 cps        |               |
| 63Cu     | 79.145 ppb            | 3,312,346 cps     |               |
| 64Zn     | 169.096 ppb           | 4,394,390 cps     |               |
| 69Ga     | 1.104 ppb             | 118,704 cps       |               |
| 75As     | 0.902 ppb             | 11,019 cps        |               |
| 80Se     | 175.817 ppb           | 9,100,834 cps     |               |
| 85Rb     | 2.243 ppb             | 294,812 cps       |               |
| 88Sr     | 9.707 ppb             | 1,790,794 cps     |               |
| 107Ag    | 0.468 ppb             | 40,843 cps        |               |
| 114Cd    | 0.220 ppb             | 12,818 cps        |               |
| 133Cs    | 0.067 ppb             | 15,404 cps        |               |
| 138Ba    | 21.164 ppb            | 4,243,618 cps     |               |
| 139La    | 0.292 ppb             | 59,838 cps        |               |
| 140Ce    | 0.544 ppb             | 117,255 cps       |               |
| 141Pr    | 0.123 ppb             | 41,369 cps        |               |
| 142Nd    | 0.406 ppb             | 49,656 cps        |               |
| 152Sm    | 0.064 ppb             | 6,842 cps         |               |
| 153Eu    | 0.016 ppb             | 3,611 cps         |               |
| 158Gd    | 0.098 ppb             | 9,358 cps         |               |
| 164Dy    | 0.049 ppb             | 6,322 cps         |               |
| 165Ho    | 0.006 ppb             | 2,734 cps         |               |
| 166Er    | 0.183 ppb             | 26,363 cps        |               |
| 169Tm    | 0.003 ppb             | 1,147 cps         |               |
| 174Yb    | 0.015 ppb             | 2,367 cps         |               |
| 175Lu    | 0.002 ppb             | 1,060 cps         |               |
| 205Tl    | 0.007 ppb             | 1,703 cps         |               |
| 208Pb    | 4.015 ppb             | 715,667 cps       |               |
| 232Th    | 0.066 ppb             | 19,798 cps        |               |
| 238U     | 0.024 ppb             | 9,284 cps         |               |

## Sample Summary

Instrument ID: iCAP Q

Analysis index: 9

Analysis name: 15016jian

Analysis started at: 8/24/2021 6:14:58 PM

User name: WINDOWS-UPCI4ER\Administrator

| Category | Concentration average | Concentration RSD |
|----------|-----------------------|-------------------|
| 9Be      | 0.043 ppb             |                   |
| 11B      | 25.171 ppb            |                   |
| 23Na     | 1,444.232 ppb         |                   |
| 24Mg     | 980.208 ppb           |                   |
| 27Al     | 791.137 ppb           |                   |
| 31P      | 792.330 ppb           |                   |
| 32S      | 834,322.364 ppb       |                   |
| 39K      | 5,113.249 ppb         |                   |
| 40Ca     | 296.230 ppb           |                   |
| 51V      | 2.009 ppb             |                   |
| 52Cr     | 2.921 ppb             |                   |
| 55Mn     | 25.935 ppb            |                   |
| 56Fe     | 572.014 ppb           |                   |
| 58Ni     | 7.130 ppb             |                   |
| 59Co     | 0.359 ppb             |                   |
| 63Cu     | 39.618 ppb            |                   |
| 64Zn     | 184.586 ppb           |                   |
| 69Ga     | 0.888 ppb             |                   |
| 75As     | 3.597 ppb             |                   |
| 80Se     | 96.988 ppb            |                   |
| 85Rb     | 4.134 ppb             |                   |
| 88Sr     | 13.601 ppb            |                   |
| 107Ag    | 0.367 ppb             |                   |
| 114Cd    | 0.226 ppb             |                   |
| 133Cs    | 0.409 ppb             |                   |
| 138Ba    | 15.487 ppb            |                   |
| 139La    | 0.545 ppb             |                   |
| 140Ce    | 1.117 ppb             |                   |
| 141Pr    | 0.142 ppb             |                   |
| 142Nd    | 0.707 ppb             |                   |
| 152Sm    | 0.114 ppb             |                   |
| 153Eu    | 0.021 ppb             |                   |
| 158Gd    | 0.188 ppb             |                   |
| 164Dy    | 0.078 ppb             |                   |
| 165Ho    | 0.012 ppb             |                   |
| 166Er    | 0.092 ppb             |                   |
| 169Tm    | 0.005 ppb             |                   |
| 174Yb    | 0.029 ppb             |                   |
| 175Lu    | 0.004 ppb             |                   |
| 205Tl    | 0.011 ppb             |                   |
| 208Pb    | 2.220 ppb             |                   |
| 232Th    | 0.125 ppb             |                   |
| 238U     | 0.031 ppb             |                   |

| Category | Concentration average | Intensity average | Intensity RSD |
|----------|-----------------------|-------------------|---------------|
| 9Be      | 0.043 ppb             | 773 cps           |               |
| 11B      | 25.171 ppb            | 703,921 cps       |               |
| 23Na     | 1,444.232 ppb         | 227,573,844 cps   |               |
| 24Mg     | 980.208 ppb           | 64,696,645 cps    |               |
| 27Al     | 791.137 ppb           | 67,457,582 cps    |               |

| Category | Concentration average | Intensity average | Intensity RSD |
|----------|-----------------------|-------------------|---------------|
| 31P      | 792.330 ppb           | 3,714,548 cps     |               |
| 32S      | 834,322.364 ppb       | 1,144,370,243 cps |               |
| 39K      | 5,113.249 ppb         | 512,920,349 cps   |               |
| 40Ca     | 296.230 ppb           | 3,483,750,478 cps |               |
| 51V      | 2.009 ppb             | 160,846 cps       |               |
| 52Cr     | 2.921 ppb             | 271,587 cps       |               |
| 55Mn     | 25.935 ppb            | 3,702,822 cps     |               |
| 56Fe     | 572.014 ppb           | 75,676,867 cps    |               |
| 58Ni     | 7.130 ppb             | 322,636 cps       |               |
| 59Co     | 0.359 ppb             | 35,123 cps        |               |
| 63Cu     | 39.618 ppb            | 1,659,606 cps     |               |
| 64Zn     | 184.586 ppb           | 4,796,601 cps     |               |
| 69Ga     | 0.888 ppb             | 97,601 cps        |               |
| 75As     | 3.597 ppb             | 42,021 cps        |               |
| 80Se     | 96.988 ppb            | 8,080,515 cps     |               |
| 85Rb     | 4.134 ppb             | 541,257 cps       |               |
| 88Sr     | 13.601 ppb            | 2,508,554 cps     |               |
| 107Ag    | 0.367 ppb             | 32,349 cps        |               |
| 114Cd    | 0.226 ppb             | 13,100 cps        |               |
| 133Cs    | 0.409 ppb             | 92,992 cps        |               |
| 138Ba    | 15.487 ppb            | 3,106,476 cps     |               |
| 139La    | 0.545 ppb             | 111,419 cps       |               |
| 140Ce    | 1.117 ppb             | 240,439 cps       |               |
| 141Pr    | 0.142 ppb             | 47,534 cps        |               |
| 142Nd    | 0.707 ppb             | 86,354 cps        |               |
| 152Sm    | 0.114 ppb             | 12,213 cps        |               |
| 153Eu    | 0.021 ppb             | 4,668 cps         |               |
| 158Gd    | 0.188 ppb             | 17,953 cps        |               |
| 164Dy    | 0.078 ppb             | 10,084 cps        |               |
| 165Ho    | 0.012 ppb             | 5,208 cps         |               |
| 166Er    | 0.092 ppb             | 13,270 cps        |               |
| 169Tm    | 0.005 ppb             | 2,060 cps         |               |
| 174Yb    | 0.029 ppb             | 4,604 cps         |               |
| 175Lu    | 0.004 ppb             | 1,660 cps         |               |
| 205Tl    | 0.011 ppb             | 2,907 cps         |               |
| 208Pb    | 2.220 ppb             | 396,713 cps       |               |
| 232Th    | 0.125 ppb             | 36,868 cps        |               |
| 238U     | 0.031 ppb             | 12,036 cps        |               |

## Sample Summary

Instrument ID: iCAP Q

Analysis index: 10

Analysis name: 15020jian

Analysis started at: 8/24/2021 6:16:49 PM

User name: WINDOWS-UPCI4ER\Administrator

| Category | Concentration average | Concentration RSD |
|----------|-----------------------|-------------------|
| 9Be      | 0.027 ppb             |                   |
| 11B      | 15.371 ppb            |                   |
| 23Na     | 2,139.136 ppb         |                   |
| 24Mg     | 1,099.042 ppb         |                   |
| 27Al     | 1,041.035 ppb         |                   |
| 31P      | 998.473 ppb           |                   |
| 32S      | 883,762.953 ppb       |                   |
| 39K      | 8,312.853 ppb         |                   |
| 40Ca     | 339.400 ppb           |                   |
| 51V      | 2.542 ppb             |                   |
| 52Cr     | 3.370 ppb             |                   |
| 55Mn     | 27.826 ppb            |                   |
| 56Fe     | 820.566 ppb           |                   |
| 58Ni     | 9.735 ppb             |                   |
| 59Co     | 0.440 ppb             |                   |
| 63Cu     | 21.657 ppb            |                   |
| 64Zn     | 206.906 ppb           |                   |
| 69Ga     | 1.181 ppb             |                   |
| 75As     | 1.008 ppb             |                   |
| 80Se     | 110.529 ppb           |                   |
| 85Rb     | 6.089 ppb             |                   |
| 88Sr     | 14.406 ppb            |                   |
| 107Ag    | 0.665 ppb             |                   |
| 114Cd    | 0.275 ppb             |                   |
| 133Cs    | 0.176 ppb             |                   |
| 138Ba    | 19.823 ppb            |                   |
| 139La    | 0.741 ppb             |                   |
| 140Ce    | 1.389 ppb             |                   |
| 141Pr    | 0.178 ppb             |                   |
| 142Nd    | 0.870 ppb             |                   |
| 152Sm    | 0.156 ppb             |                   |
| 153Eu    | 0.028 ppb             |                   |
| 158Gd    | 0.236 ppb             |                   |
| 164Dy    | 0.098 ppb             |                   |
| 165Ho    | 0.016 ppb             |                   |
| 166Er    | 0.181 ppb             |                   |
| 169Tm    | 0.006 ppb             |                   |
| 174Yb    | 0.038 ppb             |                   |
| 175Lu    | 0.005 ppb             |                   |
| 205Tl    | 0.011 ppb             |                   |
| 208Pb    | 1.342 ppb             |                   |
| 232Th    | 0.171 ppb             |                   |
| 238U     | 0.035 ppb             |                   |

| Category | Concentration average | Intensity average | Intensity RSD |
|----------|-----------------------|-------------------|---------------|
| 9Be      | 0.027 ppb             | 520 cps           |               |
| 11B      | 15.371 ppb            | 430,937 cps       |               |
| 23Na     | 2,139.136 ppb         | 336,804,252 cps   |               |
| 24Mg     | 1,099.042 ppb         | 72,537,394 cps    |               |
| 27Al     | 1,041.035 ppb         | 88,737,857 cps    |               |

| Category | Concentration average | Intensity average | Intensity RSD |
|----------|-----------------------|-------------------|---------------|
| 31P      | 998.473 ppb           | 4,600,568 cps     |               |
| 32S      | 883,762.953 ppb       | 1,192,837,023 cps |               |
| 39K      | 8,312.853 ppb         | 832,612,182 cps   |               |
| 40Ca     | 339.400 ppb           | 3,680,721,936 cps |               |
| 51V      | 2.542 ppb             | 202,235 cps       |               |
| 52Cr     | 3.370 ppb             | 305,176 cps       |               |
| 55Mn     | 27.826 ppb            | 3,970,790 cps     |               |
| 56Fe     | 820.566 ppb           | 105,063,435 cps   |               |
| 58Ni     | 9.735 ppb             | 432,414 cps       |               |
| 59Co     | 0.440 ppb             | 42,499 cps        |               |
| 63Cu     | 21.657 ppb            | 908,619 cps       |               |
| 64Zn     | 206.906 ppb           | 5,376,148 cps     |               |
| 69Ga     | 1.181 ppb             | 126,198 cps       |               |
| 75As     | 1.008 ppb             | 12,233 cps        |               |
| 80Se     | 110.529 ppb           | 8,255,782 cps     |               |
| 85Rb     | 6.089 ppb             | 796,125 cps       |               |
| 88Sr     | 14.406 ppb            | 2,656,820 cps     |               |
| 107Ag    | 0.665 ppb             | 57,519 cps        |               |
| 114Cd    | 0.275 ppb             | 15,343 cps        |               |
| 133Cs    | 0.176 ppb             | 40,034 cps        |               |
| 138Ba    | 19.823 ppb            | 3,975,042 cps     |               |
| 139La    | 0.741 ppb             | 151,661 cps       |               |
| 140Ce    | 1.389 ppb             | 299,070 cps       |               |
| 141Pr    | 0.178 ppb             | 59,779 cps        |               |
| 142Nd    | 0.870 ppb             | 106,294 cps       |               |
| 152Sm    | 0.156 ppb             | 16,761 cps        |               |
| 153Eu    | 0.028 ppb             | 6,275 cps         |               |
| 158Gd    | 0.236 ppb             | 22,617 cps        |               |
| 164Dy    | 0.098 ppb             | 12,703 cps        |               |
| 165Ho    | 0.016 ppb             | 6,985 cps         |               |
| 166Er    | 0.181 ppb             | 26,124 cps        |               |
| 169Tm    | 0.006 ppb             | 2,760 cps         |               |
| 174Yb    | 0.038 ppb             | 5,948 cps         |               |
| 175Lu    | 0.005 ppb             | 2,350 cps         |               |
| 205Tl    | 0.011 ppb             | 2,947 cps         |               |
| 208Pb    | 1.342 ppb             | 240,839 cps       |               |
| 232Th    | 0.171 ppb             | 50,542 cps        |               |
| 238U     | 0.035 ppb             | 13,537 cps        |               |

## Sample Summary

Instrument ID: iCAP Q

Analysis index: 11

Analysis name: 15020ti

Analysis started at: 8/24/2021 6:18:41 PM

User name: WINDOWS-UPCI4ER\Administrator

| Category | Concentration average | Concentration RSD |
|----------|-----------------------|-------------------|
| 9Be      | 0.028 ppb             |                   |
| 11B      | 22.533 ppb            |                   |
| 23Na     | 1,139.904 ppb         |                   |
| 24Mg     | 897.263 ppb           |                   |
| 27Al     | 500.614 ppb           |                   |
| 31P      | 904.455 ppb           |                   |
| 32S      | 861,322.682 ppb       |                   |
| 39K      | 5,200.556 ppb         |                   |
| 40Ca     | 436.138 ppb           |                   |
| 51V      | 1.483 ppb             |                   |
| 52Cr     | 2.348 ppb             |                   |
| 55Mn     | 21.803 ppb            |                   |
| 56Fe     | 395.311 ppb           |                   |
| 58Ni     | 5.203 ppb             |                   |
| 59Co     | 0.843 ppb             |                   |
| 63Cu     | 27.225 ppb            |                   |
| 64Zn     | 207.108 ppb           |                   |
| 69Ga     | 0.835 ppb             |                   |
| 75As     | 2.837 ppb             |                   |
| 80Se     | 145.694 ppb           |                   |
| 85Rb     | 3.688 ppb             |                   |
| 88Sr     | 12.438 ppb            |                   |
| 107Ag    | 0.604 ppb             |                   |
| 114Cd    | 0.307 ppb             |                   |
| 133Cs    | 0.312 ppb             |                   |
| 138Ba    | 13.029 ppb            |                   |
| 139La    | 0.305 ppb             |                   |
| 140Ce    | 0.940 ppb             |                   |
| 141Pr    | 0.071 ppb             |                   |
| 142Nd    | 0.379 ppb             |                   |
| 152Sm    | 0.061 ppb             |                   |
| 153Eu    | 0.014 ppb             |                   |
| 158Gd    | 0.112 ppb             |                   |
| 164Dy    | 0.040 ppb             |                   |
| 165Ho    | 0.007 ppb             |                   |
| 166Er    | 0.071 ppb             |                   |
| 169Tm    | 0.003 ppb             |                   |
| 174Yb    | 0.015 ppb             |                   |
| 175Lu    | 0.002 ppb             |                   |
| 205Tl    | 0.008 ppb             |                   |
| 208Pb    | 1.262 ppb             |                   |
| 232Th    | 0.069 ppb             |                   |
| 238U     | 0.020 ppb             |                   |

| Category | Concentration average | Intensity average | Intensity RSD |
|----------|-----------------------|-------------------|---------------|
| 9Be      | 0.028 ppb             | 527 cps           |               |
| 11B      | 22.533 ppb            | 630,444 cps       |               |
| 23Na     | 1,139.904 ppb         | 179,737,244 cps   |               |
| 24Mg     | 897.263 ppb           | 59,223,792 cps    |               |
| 27Al     | 500.614 ppb           | 42,717,800 cps    |               |

| Category | Concentration average | Intensity average | Intensity RSD |
|----------|-----------------------|-------------------|---------------|
| 31P      | 904.455 ppb           | 4,196,469 cps     |               |
| 32S      | 861,322.682 ppb       | 1,170,838,748 cps |               |
| 39K      | 5,200.556 ppb         | 521,643,725 cps   |               |
| 40Ca     | 436.138 ppb           | 4,122,110,793 cps |               |
| 51V      | 1.483 ppb             | 119,987 cps       |               |
| 52Cr     | 2.348 ppb             | 228,807 cps       |               |
| 55Mn     | 21.803 ppb            | 3,117,087 cps     |               |
| 56Fe     | 395.311 ppb           | 54,785,150 cps    |               |
| 58Ni     | 5.203 ppb             | 241,376 cps       |               |
| 59Co     | 0.843 ppb             | 78,873 cps        |               |
| 63Cu     | 27.225 ppb            | 1,141,468 cps     |               |
| 64Zn     | 207.108 ppb           | 5,381,393 cps     |               |
| 69Ga     | 0.835 ppb             | 92,421 cps        |               |
| 75As     | 2.837 ppb             | 33,274 cps        |               |
| 80Se     | 145.694 ppb           | 8,710,941 cps     |               |
| 85Rb     | 3.688 ppb             | 483,211 cps       |               |
| 88Sr     | 12.438 ppb            | 2,294,202 cps     |               |
| 107Ag    | 0.604 ppb             | 52,376 cps        |               |
| 114Cd    | 0.307 ppb             | 16,828 cps        |               |
| 133Cs    | 0.312 ppb             | 70,978 cps        |               |
| 138Ba    | 13.029 ppb            | 2,614,317 cps     |               |
| 139La    | 0.305 ppb             | 62,426 cps        |               |
| 140Ce    | 0.940 ppb             | 202,456 cps       |               |
| 141Pr    | 0.071 ppb             | 23,943 cps        |               |
| 142Nd    | 0.379 ppb             | 46,389 cps        |               |
| 152Sm    | 0.061 ppb             | 6,582 cps         |               |
| 153Eu    | 0.014 ppb             | 3,070 cps         |               |
| 158Gd    | 0.112 ppb             | 10,735 cps        |               |
| 164Dy    | 0.040 ppb             | 5,138 cps         |               |
| 165Ho    | 0.007 ppb             | 2,940 cps         |               |
| 166Er    | 0.071 ppb             | 10,321 cps        |               |
| 169Tm    | 0.003 ppb             | 1,213 cps         |               |
| 174Yb    | 0.015 ppb             | 2,347 cps         |               |
| 175Lu    | 0.002 ppb             | 1,050 cps         |               |
| 205Tl    | 0.008 ppb             | 2,090 cps         |               |
| 208Pb    | 1.262 ppb             | 226,696 cps       |               |
| 232Th    | 0.069 ppb             | 20,514 cps        |               |
| 238U     | 0.020 ppb             | 7,893 cps         |               |

## Sample Summary

Instrument ID: iCAP Q

Analysis index: 12

Analysis name: 15022jian

Analysis started at: 8/24/2021 6:20:32 PM

User name: WINDOWS-UPCI4ER\Administrator

| Category | Concentration average | Concentration RSD |
|----------|-----------------------|-------------------|
| 9Be      | 0.016 ppb             |                   |
| 11B      | 21.378 ppb            |                   |
| 23Na     | 1,073.192 ppb         |                   |
| 24Mg     | 945.533 ppb           |                   |
| 27Al     | 710.714 ppb           |                   |
| 31P      | 817.104 ppb           |                   |
| 32S      | 866,944.250 ppb       |                   |
| 39K      | 5,745.748 ppb         |                   |
| 40Ca     | 366.319 ppb           |                   |
| 51V      | 1.895 ppb             |                   |
| 52Cr     | 3.018 ppb             |                   |
| 55Mn     | 23.318 ppb            |                   |
| 56Fe     | 595.971 ppb           |                   |
| 58Ni     | 19.305 ppb            |                   |
| 59Co     | 0.358 ppb             |                   |
| 63Cu     | 36.952 ppb            |                   |
| 64Zn     | 222.812 ppb           |                   |
| 69Ga     | 1.202 ppb             |                   |
| 75As     | 0.928 ppb             |                   |
| 80Se     | 158.229 ppb           |                   |
| 85Rb     | 4.171 ppb             |                   |
| 88Sr     | 14.759 ppb            |                   |
| 107Ag    | 0.867 ppb             |                   |
| 114Cd    | 0.702 ppb             |                   |
| 133Cs    | 0.131 ppb             |                   |
| 138Ba    | 19.921 ppb            |                   |
| 139La    | 0.480 ppb             |                   |
| 140Ce    | 0.941 ppb             |                   |
| 141Pr    | 0.120 ppb             |                   |
| 142Nd    | 0.571 ppb             |                   |
| 152Sm    | 0.097 ppb             |                   |
| 153Eu    | 0.021 ppb             |                   |
| 158Gd    | 0.154 ppb             |                   |
| 164Dy    | 0.069 ppb             |                   |
| 165Ho    | 0.009 ppb             |                   |
| 166Er    | 0.238 ppb             |                   |
| 169Tm    | 0.004 ppb             |                   |
| 174Yb    | 0.024 ppb             |                   |
| 175Lu    | 0.004 ppb             |                   |
| 205Tl    | 0.010 ppb             |                   |
| 208Pb    | 2.057 ppb             |                   |
| 232Th    | 0.119 ppb             |                   |
| 238U     | 0.027 ppb             |                   |

| Category | Concentration average | Intensity average | Intensity RSD |
|----------|-----------------------|-------------------|---------------|
| 9Be      | 0.016 ppb             | 327 cps           |               |
| 11B      | 21.378 ppb            | 598,280 cps       |               |
| 23Na     | 1,073.192 ppb         | 169,250,941 cps   |               |
| 24Mg     | 945.533 ppb           | 62,408,752 cps    |               |
| 27Al     | 710.714 ppb           | 60,609,007 cps    |               |

| Category | Concentration average | Intensity average | Intensity RSD |
|----------|-----------------------|-------------------|---------------|
| 31P      | 817.104 ppb           | 3,821,029 cps     |               |
| 32S      | 866,944.250 ppb       | 1,176,349,591 cps |               |
| 39K      | 5,745.748 ppb         | 576,117,208 cps   |               |
| 40Ca     | 366.319 ppb           | 3,803,545,089 cps |               |
| 51V      | 1.895 ppb             | 151,990 cps       |               |
| 52Cr     | 3.018 ppb             | 278,876 cps       |               |
| 55Mn     | 23.318 ppb            | 3,331,837 cps     |               |
| 56Fe     | 595.971 ppb           | 78,509,380 cps    |               |
| 58Ni     | 19.305 ppb            | 835,853 cps       |               |
| 59Co     | 0.358 ppb             | 35,046 cps        |               |
| 63Cu     | 36.952 ppb            | 1,548,141 cps     |               |
| 64Zn     | 222.812 ppb           | 5,789,139 cps     |               |
| 69Ga     | 1.202 ppb             | 128,296 cps       |               |
| 75As     | 0.928 ppb             | 11,312 cps        |               |
| 80Se     | 158.229 ppb           | 8,873,184 cps     |               |
| 85Rb     | 4.171 ppb             | 546,112 cps       |               |
| 88Sr     | 14.759 ppb            | 2,721,859 cps     |               |
| 107Ag    | 0.867 ppb             | 74,558 cps        |               |
| 114Cd    | 0.702 ppb             | 34,956 cps        |               |
| 133Cs    | 0.131 ppb             | 29,812 cps        |               |
| 138Ba    | 19.921 ppb            | 3,994,699 cps     |               |
| 139La    | 0.480 ppb             | 98,219 cps        |               |
| 140Ce    | 0.941 ppb             | 202,782 cps       |               |
| 141Pr    | 0.120 ppb             | 40,168 cps        |               |
| 142Nd    | 0.571 ppb             | 69,818 cps        |               |
| 152Sm    | 0.097 ppb             | 10,398 cps        |               |
| 153Eu    | 0.021 ppb             | 4,711 cps         |               |
| 158Gd    | 0.154 ppb             | 14,759 cps        |               |
| 164Dy    | 0.069 ppb             | 8,917 cps         |               |
| 165Ho    | 0.009 ppb             | 4,197 cps         |               |
| 166Er    | 0.238 ppb             | 34,301 cps        |               |
| 169Tm    | 0.004 ppb             | 1,730 cps         |               |
| 174Yb    | 0.024 ppb             | 3,791 cps         |               |
| 175Lu    | 0.004 ppb             | 1,600 cps         |               |
| 205Tl    | 0.010 ppb             | 2,497 cps         |               |
| 208Pb    | 2.057 ppb             | 367,875 cps       |               |
| 232Th    | 0.119 ppb             | 35,226 cps        |               |
| 238U     | 0.027 ppb             | 10,511 cps        |               |

## Sample Summary

Instrument ID: iCAP Q

Analysis index: 13

Analysis name: 15022ti

Analysis started at: 8/24/2021 6:22:20 PM

User name: WINDOWS-UPCI4ER\Administrator

| Category | Concentration average | Concentration RSD |
|----------|-----------------------|-------------------|
| 9Be      | 0.014 ppb             |                   |
| 11B      | 21.199 ppb            |                   |
| 23Na     | 856.295 ppb           |                   |
| 24Mg     | 913.650 ppb           |                   |
| 27Al     | 628.917 ppb           |                   |
| 31P      | 830.904 ppb           |                   |
| 32S      | 887,769.558 ppb       |                   |
| 39K      | 5,363.662 ppb         |                   |
| 40Ca     | 323.208 ppb           |                   |
| 51V      | 1.861 ppb             |                   |
| 52Cr     | 2.686 ppb             |                   |
| 55Mn     | 22.553 ppb            |                   |
| 56Fe     | 510.402 ppb           |                   |
| 58Ni     | 6.195 ppb             |                   |
| 59Co     | 0.310 ppb             |                   |
| 63Cu     | 28.681 ppb            |                   |
| 64Zn     | 240.880 ppb           |                   |
| 69Ga     | 1.033 ppb             |                   |
| 75As     | 0.979 ppb             |                   |
| 80Se     | 141.261 ppb           |                   |
| 85Rb     | 3.322 ppb             |                   |
| 88Sr     | 11.859 ppb            |                   |
| 107Ag    | 0.525 ppb             |                   |
| 114Cd    | 0.721 ppb             |                   |
| 133Cs    | 0.104 ppb             |                   |
| 138Ba    | 18.710 ppb            |                   |
| 139La    | 0.379 ppb             |                   |
| 140Ce    | 0.738 ppb             |                   |
| 141Pr    | 0.095 ppb             |                   |
| 142Nd    | 0.469 ppb             |                   |
| 152Sm    | 0.086 ppb             |                   |
| 153Eu    | 0.019 ppb             |                   |
| 158Gd    | 0.129 ppb             |                   |
| 164Dy    | 0.059 ppb             |                   |
| 165Ho    | 0.009 ppb             |                   |
| 166Er    | 0.225 ppb             |                   |
| 169Tm    | 0.004 ppb             |                   |
| 174Yb    | 0.021 ppb             |                   |
| 175Lu    | 0.003 ppb             |                   |
| 205Tl    | 0.008 ppb             |                   |
| 208Pb    | 1.370 ppb             |                   |
| 232Th    | 0.102 ppb             |                   |
| 238U     | 0.026 ppb             |                   |

| Category | Concentration average | Intensity average | Intensity RSD |
|----------|-----------------------|-------------------|---------------|
| 9Be      | 0.014 ppb             | 300 cps           |               |
| 11B      | 21.199 ppb            | 593,272 cps       |               |
| 23Na     | 856.295 ppb           | 135,157,264 cps   |               |
| 24Mg     | 913.650 ppb           | 60,305,065 cps    |               |
| 27Al     | 628.917 ppb           | 53,643,580 cps    |               |

| Category | Concentration average | Intensity average | Intensity RSD |
|----------|-----------------------|-------------------|---------------|
| 31P      | 830.904 ppb           | 3,880,342 cps     |               |
| 32S      | 887,769.558 ppb       | 1,196,764,713 cps |               |
| 39K      | 5,363.662 ppb         | 537,940,641 cps   |               |
| 40Ca     | 323.208 ppb           | 3,606,844,726 cps |               |
| 51V      | 1.861 ppb             | 149,407 cps       |               |
| 52Cr     | 2.686 ppb             | 254,070 cps       |               |
| 55Mn     | 22.553 ppb            | 3,223,468 cps     |               |
| 56Fe     | 510.402 ppb           | 68,392,480 cps    |               |
| 58Ni     | 6.195 ppb             | 283,226 cps       |               |
| 59Co     | 0.310 ppb             | 30,674 cps        |               |
| 63Cu     | 28.681 ppb            | 1,202,347 cps     |               |
| 64Zn     | 240.880 ppb           | 6,258,264 cps     |               |
| 69Ga     | 1.033 ppb             | 111,715 cps       |               |
| 75As     | 0.979 ppb             | 11,902 cps        |               |
| 80Se     | 141.261 ppb           | 8,653,556 cps     |               |
| 85Rb     | 3.322 ppb             | 435,438 cps       |               |
| 88Sr     | 11.859 ppb            | 2,187,341 cps     |               |
| 107Ag    | 0.525 ppb             | 45,660 cps        |               |
| 114Cd    | 0.721 ppb             | 35,798 cps        |               |
| 133Cs    | 0.104 ppb             | 23,779 cps        |               |
| 138Ba    | 18.710 ppb            | 3,752,146 cps     |               |
| 139La    | 0.379 ppb             | 77,548 cps        |               |
| 140Ce    | 0.738 ppb             | 159,099 cps       |               |
| 141Pr    | 0.095 ppb             | 31,968 cps        |               |
| 142Nd    | 0.469 ppb             | 57,358 cps        |               |
| 152Sm    | 0.086 ppb             | 9,227 cps         |               |
| 153Eu    | 0.019 ppb             | 4,244 cps         |               |
| 158Gd    | 0.129 ppb             | 12,376 cps        |               |
| 164Dy    | 0.059 ppb             | 7,632 cps         |               |
| 165Ho    | 0.009 ppb             | 4,177 cps         |               |
| 166Er    | 0.225 ppb             | 32,513 cps        |               |
| 169Tm    | 0.004 ppb             | 1,710 cps         |               |
| 174Yb    | 0.021 ppb             | 3,324 cps         |               |
| 175Lu    | 0.003 ppb             | 1,267 cps         |               |
| 205Tl    | 0.008 ppb             | 2,140 cps         |               |
| 208Pb    | 1.370 ppb             | 245,890 cps       |               |
| 232Th    | 0.102 ppb             | 30,183 cps        |               |
| 238U     | 0.026 ppb             | 10,027 cps        |               |

## Sample Summary

Instrument ID: iCAP Q

Analysis index: 14

Analysis name: 1502713jian

Analysis started at: 8/24/2021 6:24:07 PM

User name: WINDOWS-UPCI4ER\Administrator

| Category | Concentration average | Concentration RSD |
|----------|-----------------------|-------------------|
| 9Be      | 0.017 ppb             |                   |
| 11B      | 22.116 ppb            |                   |
| 23Na     | 1,194.284 ppb         |                   |
| 24Mg     | 853.587 ppb           |                   |
| 27Al     | 644.322 ppb           |                   |
| 31P      | 787.633 ppb           |                   |
| 32S      | 802,045.165 ppb       |                   |
| 39K      | 4,705.242 ppb         |                   |
| 40Ca     | 187.229 ppb           |                   |
| 51V      | 1.712 ppb             |                   |
| 52Cr     | 3.221 ppb             |                   |
| 55Mn     | 19.715 ppb            |                   |
| 56Fe     | 598.689 ppb           |                   |
| 58Ni     | 7.746 ppb             |                   |
| 59Co     | 0.324 ppb             |                   |
| 63Cu     | 34.236 ppb            |                   |
| 64Zn     | 196.089 ppb           |                   |
| 69Ga     | 0.946 ppb             |                   |
| 75As     | 1.279 ppb             |                   |
| 80Se     | 98.443 ppb            |                   |
| 85Rb     | 3.838 ppb             |                   |
| 88Sr     | 8.571 ppb             |                   |
| 107Ag    | 0.619 ppb             |                   |
| 114Cd    | 0.735 ppb             |                   |
| 133Cs    | 0.113 ppb             |                   |
| 138Ba    | 18.279 ppb            |                   |
| 139La    | 0.419 ppb             |                   |
| 140Ce    | 0.865 ppb             |                   |
| 141Pr    | 0.106 ppb             |                   |
| 142Nd    | 0.520 ppb             |                   |
| 152Sm    | 0.088 ppb             |                   |
| 153Eu    | 0.021 ppb             |                   |
| 158Gd    | 0.151 ppb             |                   |
| 164Dy    | 0.068 ppb             |                   |
| 165Ho    | 0.009 ppb             |                   |
| 166Er    | 0.243 ppb             |                   |
| 169Tm    | 0.004 ppb             |                   |
| 174Yb    | 0.025 ppb             |                   |
| 175Lu    | 0.003 ppb             |                   |
| 205Tl    | 0.013 ppb             |                   |
| 208Pb    | 1.755 ppb             |                   |
| 232Th    | 0.102 ppb             |                   |
| 238U     | 0.027 ppb             |                   |

| Category | Concentration average | Intensity average | Intensity RSD |
|----------|-----------------------|-------------------|---------------|
| 9Be      | 0.017 ppb             | 347 cps           |               |
| 11B      | 22.116 ppb            | 618,837 cps       |               |
| 23Na     | 1,194.284 ppb         | 188,285,138 cps   |               |
| 24Mg     | 853.587 ppb           | 56,341,999 cps    |               |
| 27Al     | 644.322 ppb           | 54,955,414 cps    |               |

| Category | Concentration average | Intensity average | Intensity RSD |
|----------|-----------------------|-------------------|---------------|
| 31P      | 787.633 ppb           | 3,694,360 cps     |               |
| 32S      | 802,045.165 ppb       | 1,112,728,793 cps |               |
| 39K      | 4,705.242 ppb         | 472,153,921 cps   |               |
| 40Ca     | 187.229 ppb           | 2,986,411,755 cps |               |
| 51V      | 1.712 ppb             | 137,787 cps       |               |
| 52Cr     | 3.221 ppb             | 294,058 cps       |               |
| 55Mn     | 19.715 ppb            | 2,821,237 cps     |               |
| 56Fe     | 598.689 ppb           | 78,830,636 cps    |               |
| 58Ni     | 7.746 ppb             | 348,580 cps       |               |
| 59Co     | 0.324 ppb             | 32,004 cps        |               |
| 63Cu     | 34.236 ppb            | 1,434,576 cps     |               |
| 64Zn     | 196.089 ppb           | 5,095,285 cps     |               |
| 69Ga     | 0.946 ppb             | 103,212 cps       |               |
| 75As     | 1.279 ppb             | 15,356 cps        |               |
| 80Se     | 98.443 ppb            | 8,099,344 cps     |               |
| 85Rb     | 3.838 ppb             | 502,713 cps       |               |
| 88Sr     | 8.571 ppb             | 1,581,362 cps     |               |
| 107Ag    | 0.619 ppb             | 53,609 cps        |               |
| 114Cd    | 0.735 ppb             | 36,446 cps        |               |
| 133Cs    | 0.113 ppb             | 25,860 cps        |               |
| 138Ba    | 18.279 ppb            | 3,665,727 cps     |               |
| 139La    | 0.419 ppb             | 85,852 cps        |               |
| 140Ce    | 0.865 ppb             | 186,311 cps       |               |
| 141Pr    | 0.106 ppb             | 35,554 cps        |               |
| 142Nd    | 0.520 ppb             | 63,505 cps        |               |
| 152Sm    | 0.088 ppb             | 9,434 cps         |               |
| 153Eu    | 0.021 ppb             | 4,701 cps         |               |
| 158Gd    | 0.151 ppb             | 14,462 cps        |               |
| 164Dy    | 0.068 ppb             | 8,723 cps         |               |
| 165Ho    | 0.009 ppb             | 4,187 cps         |               |
| 166Er    | 0.243 ppb             | 35,079 cps        |               |
| 169Tm    | 0.004 ppb             | 1,737 cps         |               |
| 174Yb    | 0.025 ppb             | 3,864 cps         |               |
| 175Lu    | 0.003 ppb             | 1,360 cps         |               |
| 205Tl    | 0.013 ppb             | 3,214 cps         |               |
| 208Pb    | 1.755 ppb             | 314,166 cps       |               |
| 232Th    | 0.102 ppb             | 30,170 cps        |               |
| 238U     | 0.027 ppb             | 10,581 cps        |               |

## Sample Summary

Instrument ID: iCAP Q

Analysis index: 15

Analysis name: 1502713ti

Analysis started at: 8/24/2021 6:25:59 PM

User name: WINDOWS-UPCI4ER\Administrator

| Category | Concentration average | Concentration RSD |
|----------|-----------------------|-------------------|
| 9Be      | 0.016 ppb             |                   |
| 11B      | 13.685 ppb            |                   |
| 23Na     | 1,085.368 ppb         |                   |
| 24Mg     | 763.429 ppb           |                   |
| 27Al     | 633.267 ppb           |                   |
| 31P      | 774.460 ppb           |                   |
| 32S      | 755,664.027 ppb       |                   |
| 39K      | 4,831.292 ppb         |                   |
| 40Ca     | 218.049 ppb           |                   |
| 51V      | 1.598 ppb             |                   |
| 52Cr     | 2.895 ppb             |                   |
| 55Mn     | 18.655 ppb            |                   |
| 56Fe     | 539.929 ppb           |                   |
| 58Ni     | 6.828 ppb             |                   |
| 59Co     | 0.286 ppb             |                   |
| 63Cu     | 34.293 ppb            |                   |
| 64Zn     | 196.972 ppb           |                   |
| 69Ga     | 0.770 ppb             |                   |
| 75As     | 0.928 ppb             |                   |
| 80Se     | 84.578 ppb            |                   |
| 85Rb     | 3.563 ppb             |                   |
| 88Sr     | 8.188 ppb             |                   |
| 107Ag    | 1.031 ppb             |                   |
| 114Cd    | 0.748 ppb             |                   |
| 133Cs    | 0.114 ppb             |                   |
| 138Ba    | 14.430 ppb            |                   |
| 139La    | 0.424 ppb             |                   |
| 140Ce    | 0.856 ppb             |                   |
| 141Pr    | 0.110 ppb             |                   |
| 142Nd    | 0.566 ppb             |                   |
| 152Sm    | 0.087 ppb             |                   |
| 153Eu    | 0.018 ppb             |                   |
| 158Gd    | 0.148 ppb             |                   |
| 164Dy    | 0.063 ppb             |                   |
| 165Ho    | 0.010 ppb             |                   |
| 166Er    | 0.129 ppb             |                   |
| 169Tm    | 0.004 ppb             |                   |
| 174Yb    | 0.024 ppb             |                   |
| 175Lu    | 0.003 ppb             |                   |
| 205Tl    | 0.013 ppb             |                   |
| 208Pb    | 1.889 ppb             |                   |
| 232Th    | 0.105 ppb             |                   |
| 238U     | 0.048 ppb             |                   |

| Category | Concentration average | Intensity average | Intensity RSD |
|----------|-----------------------|-------------------|---------------|
| 9Be      | 0.016 ppb             | 337 cps           |               |
| 11B      | 13.685 ppb            | 383,970 cps       |               |
| 23Na     | 1,085.368 ppb         | 171,164,809 cps   |               |
| 24Mg     | 763.429 ppb           | 50,393,313 cps    |               |
| 27Al     | 633.267 ppb           | 54,013,972 cps    |               |

| Category | Concentration average | Intensity average | Intensity RSD |
|----------|-----------------------|-------------------|---------------|
| 31P      | 774.460 ppb           | 3,637,742 cps     |               |
| 32S      | 755,664.027 ppb       | 1,067,261,203 cps |               |
| 39K      | 4,831.292 ppb         | 484,748,373 cps   |               |
| 40Ca     | 218.049 ppb           | 3,127,036,730 cps |               |
| 51V      | 1.598 ppb             | 128,920 cps       |               |
| 52Cr     | 2.895 ppb             | 269,624 cps       |               |
| 55Mn     | 18.655 ppb            | 2,671,004 cps     |               |
| 56Fe     | 539.929 ppb           | 71,883,456 cps    |               |
| 58Ni     | 6.828 ppb             | 309,899 cps       |               |
| 59Co     | 0.286 ppb             | 28,576 cps        |               |
| 63Cu     | 34.293 ppb            | 1,436,993 cps     |               |
| 64Zn     | 196.972 ppb           | 5,118,205 cps     |               |
| 69Ga     | 0.770 ppb             | 86,063 cps        |               |
| 75As     | 0.928 ppb             | 11,315 cps        |               |
| 80Se     | 84.578 ppb            | 7,919,876 cps     |               |
| 85Rb     | 3.563 ppb             | 466,865 cps       |               |
| 88Sr     | 8.188 ppb             | 1,510,794 cps     |               |
| 107Ag    | 1.031 ppb             | 88,442 cps        |               |
| 114Cd    | 0.748 ppb             | 37,058 cps        |               |
| 133Cs    | 0.114 ppb             | 26,051 cps        |               |
| 138Ba    | 14.430 ppb            | 2,894,942 cps     |               |
| 139La    | 0.424 ppb             | 86,720 cps        |               |
| 140Ce    | 0.856 ppb             | 184,427 cps       |               |
| 141Pr    | 0.110 ppb             | 36,899 cps        |               |
| 142Nd    | 0.566 ppb             | 69,232 cps        |               |
| 152Sm    | 0.087 ppb             | 9,313 cps         |               |
| 153Eu    | 0.018 ppb             | 4,091 cps         |               |
| 158Gd    | 0.148 ppb             | 14,135 cps        |               |
| 164Dy    | 0.063 ppb             | 8,113 cps         |               |
| 165Ho    | 0.010 ppb             | 4,471 cps         |               |
| 166Er    | 0.129 ppb             | 18,604 cps        |               |
| 169Tm    | 0.004 ppb             | 1,830 cps         |               |
| 174Yb    | 0.024 ppb             | 3,684 cps         |               |
| 175Lu    | 0.003 ppb             | 1,480 cps         |               |
| 205Tl    | 0.013 ppb             | 3,440 cps         |               |
| 208Pb    | 1.889 ppb             | 338,010 cps       |               |
| 232Th    | 0.105 ppb             | 31,142 cps        |               |
| 238U     | 0.048 ppb             | 18,333 cps        |               |

## Sample Summary

Instrument ID: iCAP Q

Analysis index: 16

Analysis name: 15026ti

Analysis started at: 8/24/2021 6:27:48 PM

User name: WINDOWS-UPCI4ER\Administrator

| Category | Concentration average | Concentration RSD |
|----------|-----------------------|-------------------|
| 9Be      | 0.011 ppb             |                   |
| 11B      | 21.542 ppb            |                   |
| 23Na     | 1,223.291 ppb         |                   |
| 24Mg     | 955.936 ppb           |                   |
| 27Al     | 544.361 ppb           |                   |
| 31P      | 796.618 ppb           |                   |
| 32S      | 764,183.128 ppb       |                   |
| 39K      | 5,061.703 ppb         |                   |
| 40Ca     | 170.774 ppb           |                   |
| 51V      | 1.560 ppb             |                   |
| 52Cr     | 2.585 ppb             |                   |
| 55Mn     | 22.410 ppb            |                   |
| 56Fe     | 462.751 ppb           |                   |
| 58Ni     | 6.205 ppb             |                   |
| 59Co     | 0.272 ppb             |                   |
| 63Cu     | 18.426 ppb            |                   |
| 64Zn     | 210.678 ppb           |                   |
| 69Ga     | 0.914 ppb             |                   |
| 75As     | 0.896 ppb             |                   |
| 80Se     | 67.325 ppb            |                   |
| 85Rb     | 3.677 ppb             |                   |
| 88Sr     | 11.275 ppb            |                   |
| 107Ag    | 0.559 ppb             |                   |
| 114Cd    | 0.732 ppb             |                   |
| 133Cs    | 0.106 ppb             |                   |
| 138Ba    | 18.688 ppb            |                   |
| 139La    | 0.385 ppb             |                   |
| 140Ce    | 0.769 ppb             |                   |
| 141Pr    | 0.101 ppb             |                   |
| 142Nd    | 0.473 ppb             |                   |
| 152Sm    | 0.086 ppb             |                   |
| 153Eu    | 0.019 ppb             |                   |
| 158Gd    | 0.130 ppb             |                   |
| 164Dy    | 0.063 ppb             |                   |
| 165Ho    | 0.009 ppb             |                   |
| 166Er    | 0.211 ppb             |                   |
| 169Tm    | 0.004 ppb             |                   |
| 174Yb    | 0.024 ppb             |                   |
| 175Lu    | 0.003 ppb             |                   |
| 205Tl    | 0.010 ppb             |                   |
| 208Pb    | 1.690 ppb             |                   |
| 232Th    | 0.102 ppb             |                   |
| 238U     | 0.024 ppb             |                   |

| Category | Concentration average | Intensity average | Intensity RSD |
|----------|-----------------------|-------------------|---------------|
| 9Be      | 0.011 ppb             | 247 cps           |               |
| 11B      | 21.542 ppb            | 602,835 cps       |               |
| 23Na     | 1,223.291 ppb         | 192,844,661 cps   |               |
| 24Mg     | 955.936 ppb           | 63,095,124 cps    |               |
| 27Al     | 544.361 ppb           | 46,443,077 cps    |               |

| Category | Concentration average | Intensity average | Intensity RSD |
|----------|-----------------------|-------------------|---------------|
| 31P      | 796.618 ppb           | 3,732,978 cps     |               |
| 32S      | 764,183.128 ppb       | 1,075,612,507 cps |               |
| 39K      | 5,061.703 ppb         | 507,770,111 cps   |               |
| 40Ca     | 170.774 ppb           | 2,911,335,673 cps |               |
| 51V      | 1.560 ppb             | 126,026 cps       |               |
| 52Cr     | 2.585 ppb             | 246,494 cps       |               |
| 55Mn     | 22.410 ppb            | 3,203,108 cps     |               |
| 56Fe     | 462.751 ppb           | 62,758,626 cps    |               |
| 58Ni     | 6.205 ppb             | 283,611 cps       |               |
| 59Co     | 0.272 ppb             | 27,307 cps        |               |
| 63Cu     | 18.426 ppb            | 773,539 cps       |               |
| 64Zn     | 210.678 ppb           | 5,474,091 cps     |               |
| 69Ga     | 0.914 ppb             | 100,108 cps       |               |
| 75As     | 0.896 ppb             | 10,945 cps        |               |
| 80Se     | 67.325 ppb            | 7,696,568 cps     |               |
| 85Rb     | 3.677 ppb             | 481,726 cps       |               |
| 88Sr     | 11.275 ppb            | 2,079,819 cps     |               |
| 107Ag    | 0.559 ppb             | 48,554 cps        |               |
| 114Cd    | 0.732 ppb             | 36,319 cps        |               |
| 133Cs    | 0.106 ppb             | 24,324 cps        |               |
| 138Ba    | 18.688 ppb            | 3,747,766 cps     |               |
| 139La    | 0.385 ppb             | 78,883 cps        |               |
| 140Ce    | 0.769 ppb             | 165,783 cps       |               |
| 141Pr    | 0.101 ppb             | 33,840 cps        |               |
| 142Nd    | 0.473 ppb             | 57,874 cps        |               |
| 152Sm    | 0.086 ppb             | 9,270 cps         |               |
| 153Eu    | 0.019 ppb             | 4,124 cps         |               |
| 158Gd    | 0.130 ppb             | 12,423 cps        |               |
| 164Dy    | 0.063 ppb             | 8,093 cps         |               |
| 165Ho    | 0.009 ppb             | 4,091 cps         |               |
| 166Er    | 0.211 ppb             | 30,481 cps        |               |
| 169Tm    | 0.004 ppb             | 1,683 cps         |               |
| 174Yb    | 0.024 ppb             | 3,804 cps         |               |
| 175Lu    | 0.003 ppb             | 1,327 cps         |               |
| 205Tl    | 0.010 ppb             | 2,554 cps         |               |
| 208Pb    | 1.690 ppb             | 302,597 cps       |               |
| 232Th    | 0.102 ppb             | 30,253 cps        |               |
| 238U     | 0.024 ppb             | 9,260 cps         |               |

## Sample Summary

Instrument ID: iCAP Q

Analysis index: 17

Analysis name: 15026jian

Analysis started at: 8/24/2021 6:29:33 PM

User name: WINDOWS-UPCI4ER\Administrator

| Category | Concentration average | Concentration RSD |
|----------|-----------------------|-------------------|
| 9Be      | 0.007 ppb             |                   |
| 11B      | 10.398 ppb            |                   |
| 23Na     | 779.490 ppb           |                   |
| 24Mg     | 514.318 ppb           |                   |
| 27Al     | 306.901 ppb           |                   |
| 31P      | 717.199 ppb           |                   |
| 32S      | 737,537.326 ppb       |                   |
| 39K      | 4,055.058 ppb         |                   |
| 40Ca     | 172.496 ppb           |                   |
| 51V      | 1.003 ppb             |                   |
| 52Cr     | 1.984 ppb             |                   |
| 55Mn     | 12.791 ppb            |                   |
| 56Fe     | 265.320 ppb           |                   |
| 58Ni     | 3.429 ppb             |                   |
| 59Co     | 0.164 ppb             |                   |
| 63Cu     | 9.205 ppb             |                   |
| 64Zn     | 204.142 ppb           |                   |
| 69Ga     | 0.397 ppb             |                   |
| 75As     | 0.717 ppb             |                   |
| 80Se     | 66.472 ppb            |                   |
| 85Rb     | 3.097 ppb             |                   |
| 88Sr     | 7.314 ppb             |                   |
| 107Ag    | 0.070 ppb             |                   |
| 114Cd    | 0.527 ppb             |                   |
| 133Cs    | 0.057 ppb             |                   |
| 138Ba    | 7.213 ppb             |                   |
| 139La    | 0.229 ppb             |                   |
| 140Ce    | 0.445 ppb             |                   |
| 141Pr    | 0.056 ppb             |                   |
| 142Nd    | 0.286 ppb             |                   |
| 152Sm    | 0.047 ppb             |                   |
| 153Eu    | 0.010 ppb             |                   |
| 158Gd    | 0.075 ppb             |                   |
| 164Dy    | 0.029 ppb             |                   |
| 165Ho    | 0.005 ppb             |                   |
| 166Er    | 0.021 ppb             |                   |
| 169Tm    | 0.002 ppb             |                   |
| 174Yb    | 0.011 ppb             |                   |
| 175Lu    | 0.002 ppb             |                   |
| 205Tl    | 0.006 ppb             |                   |
| 208Pb    | 0.820 ppb             |                   |
| 232Th    | 0.058 ppb             |                   |
| 238U     | 0.014 ppb             |                   |

| Category | Concentration average | Intensity average | Intensity RSD |
|----------|-----------------------|-------------------|---------------|
| 9Be      | 0.007 ppb             | 187 cps           |               |
| 11B      | 10.398 ppb            | 292,424 cps       |               |
| 23Na     | 779.490 ppb           | 123,084,484 cps   |               |
| 24Mg     | 514.318 ppb           | 33,956,710 cps    |               |
| 27Al     | 306.901 ppb           | 26,221,959 cps    |               |

| Category | Concentration average | Intensity average | Intensity RSD |
|----------|-----------------------|-------------------|---------------|
| 31P      | 717.199 ppb           | 3,391,627 cps     |               |
| 32S      | 737,537.326 ppb       | 1,049,491,535 cps |               |
| 39K      | 4,055.058 ppb         | 407,190,117 cps   |               |
| 40Ca     | 172.496 ppb           | 2,919,193,522 cps |               |
| 51V      | 1.003 ppb             | 82,737 cps        |               |
| 52Cr     | 1.984 ppb             | 201,581 cps       |               |
| 55Mn     | 12.791 ppb            | 1,839,815 cps     |               |
| 56Fe     | 265.320 ppb           | 39,416,175 cps    |               |
| 58Ni     | 3.429 ppb             | 166,611 cps       |               |
| 59Co     | 0.164 ppb             | 17,509 cps        |               |
| 63Cu     | 9.205 ppb             | 387,981 cps       |               |
| 64Zn     | 204.142 ppb           | 5,304,379 cps     |               |
| 69Ga     | 0.397 ppb             | 49,568 cps        |               |
| 75As     | 0.717 ppb             | 8,890 cps         |               |
| 80Se     | 66.472 ppb            | 7,685,525 cps     |               |
| 85Rb     | 3.097 ppb             | 406,157 cps       |               |
| 88Sr     | 7.314 ppb             | 1,349,693 cps     |               |
| 107Ag    | 0.070 ppb             | 7,255 cps         |               |
| 114Cd    | 0.527 ppb             | 26,926 cps        |               |
| 133Cs    | 0.057 ppb             | 13,007 cps        |               |
| 138Ba    | 7.213 ppb             | 1,449,367 cps     |               |
| 139La    | 0.229 ppb             | 46,921 cps        |               |
| 140Ce    | 0.445 ppb             | 95,918 cps        |               |
| 141Pr    | 0.056 ppb             | 18,991 cps        |               |
| 142Nd    | 0.286 ppb             | 35,069 cps        |               |
| 152Sm    | 0.047 ppb             | 5,038 cps         |               |
| 153Eu    | 0.010 ppb             | 2,227 cps         |               |
| 158Gd    | 0.075 ppb             | 7,185 cps         |               |
| 164Dy    | 0.029 ppb             | 3,771 cps         |               |
| 165Ho    | 0.005 ppb             | 2,174 cps         |               |
| 166Er    | 0.021 ppb             | 2,990 cps         |               |
| 169Tm    | 0.002 ppb             | 880 cps           |               |
| 174Yb    | 0.011 ppb             | 1,743 cps         |               |
| 175Lu    | 0.002 ppb             | 780 cps           |               |
| 205Tl    | 0.006 ppb             | 1,623 cps         |               |
| 208Pb    | 0.820 ppb             | 148,067 cps       |               |
| 232Th    | 0.058 ppb             | 17,466 cps        |               |
| 238U     | 0.014 ppb             | 5,565 cps         |               |

## Sample Summary

Instrument ID: iCAP Q

Analysis index: 18

Analysis name: 1502671jian

Analysis started at: 8/24/2021 6:31:18 PM

User name: WINDOWS-UPCI4ER\Administrator

| Category | Concentration average | Concentration RSD |
|----------|-----------------------|-------------------|
| 9Be      | 0.014 ppb             |                   |
| 11B      | 7.315 ppb             |                   |
| 23Na     | 1,035.441 ppb         |                   |
| 24Mg     | 761.321 ppb           |                   |
| 27Al     | 543.236 ppb           |                   |
| 31P      | 693.088 ppb           |                   |
| 32S      | 726,305.969 ppb       |                   |
| 39K      | 3,472.078 ppb         |                   |
| 40Ca     | 116.776 ppb           |                   |
| 51V      | 1.513 ppb             |                   |
| 52Cr     | 2.419 ppb             |                   |
| 55Mn     | 18.980 ppb            |                   |
| 56Fe     | 456.536 ppb           |                   |
| 58Ni     | 8.958 ppb             |                   |
| 59Co     | 0.282 ppb             |                   |
| 63Cu     | 11.598 ppb            |                   |
| 64Zn     | 178.710 ppb           |                   |
| 69Ga     | 0.568 ppb             |                   |
| 75As     | 0.725 ppb             |                   |
| 80Se     | 39.675 ppb            |                   |
| 85Rb     | 2.752 ppb             |                   |
| 88Sr     | 9.253 ppb             |                   |
| 107Ag    | 0.079 ppb             |                   |
| 114Cd    | 0.753 ppb             |                   |
| 133Cs    | 0.099 ppb             |                   |
| 138Ba    | 11.426 ppb            |                   |
| 139La    | 0.413 ppb             |                   |
| 140Ce    | 0.822 ppb             |                   |
| 141Pr    | 0.102 ppb             |                   |
| 142Nd    | 0.520 ppb             |                   |
| 152Sm    | 0.085 ppb             |                   |
| 153Eu    | 0.017 ppb             |                   |
| 158Gd    | 0.145 ppb             |                   |
| 164Dy    | 0.057 ppb             |                   |
| 165Ho    | 0.010 ppb             |                   |
| 166Er    | 0.029 ppb             |                   |
| 169Tm    | 0.004 ppb             |                   |
| 174Yb    | 0.024 ppb             |                   |
| 175Lu    | 0.004 ppb             |                   |
| 205Tl    | 0.009 ppb             |                   |
| 208Pb    | 1.550 ppb             |                   |
| 232Th    | 0.099 ppb             |                   |
| 238U     | 0.030 ppb             |                   |

| Category | Concentration average | Intensity average | Intensity RSD |
|----------|-----------------------|-------------------|---------------|
| 9Be      | 0.014 ppb             | 300 cps           |               |
| 11B      | 7.315 ppb             | 206,553 cps       |               |
| 23Na     | 1,035.441 ppb         | 163,316,892 cps   |               |
| 24Mg     | 761.321 ppb           | 50,254,219 cps    |               |
| 27Al     | 543.236 ppb           | 46,347,275 cps    |               |

| Category | Concentration average | Intensity average | Intensity RSD |
|----------|-----------------------|-------------------|---------------|
| 31P      | 693.088 ppb           | 3,287,996 cps     |               |
| 32S      | 726,305.969 ppb       | 1,038,481,397 cps |               |
| 39K      | 3,472.078 ppb         | 348,941,023 cps   |               |
| 40Ca     | 116.776 ppb           | 2,664,957,867 cps |               |
| 51V      | 1.513 ppb             | 122,343 cps       |               |
| 52Cr     | 2.419 ppb             | 234,051 cps       |               |
| 55Mn     | 18.980 ppb            | 2,717,055 cps     |               |
| 56Fe     | 456.536 ppb           | 62,023,871 cps    |               |
| 58Ni     | 8.958 ppb             | 399,692 cps       |               |
| 59Co     | 0.282 ppb             | 28,172 cps        |               |
| 63Cu     | 11.598 ppb            | 488,050 cps       |               |
| 64Zn     | 178.710 ppb           | 4,644,030 cps     |               |
| 69Ga     | 0.568 ppb             | 66,290 cps        |               |
| 75As     | 0.725 ppb             | 8,983 cps         |               |
| 80Se     | 39.675 ppb            | 7,338,670 cps     |               |
| 85Rb     | 2.752 ppb             | 361,227 cps       |               |
| 88Sr     | 9.253 ppb             | 1,707,159 cps     |               |
| 107Ag    | 0.079 ppb             | 7,966 cps         |               |
| 114Cd    | 0.753 ppb             | 37,278 cps        |               |
| 133Cs    | 0.099 ppb             | 22,580 cps        |               |
| 138Ba    | 11.426 ppb            | 2,293,209 cps     |               |
| 139La    | 0.413 ppb             | 84,628 cps        |               |
| 140Ce    | 0.822 ppb             | 177,018 cps       |               |
| 141Pr    | 0.102 ppb             | 34,394 cps        |               |
| 142Nd    | 0.520 ppb             | 63,583 cps        |               |
| 152Sm    | 0.085 ppb             | 9,150 cps         |               |
| 153Eu    | 0.017 ppb             | 3,794 cps         |               |
| 158Gd    | 0.145 ppb             | 13,911 cps        |               |
| 164Dy    | 0.057 ppb             | 7,349 cps         |               |
| 165Ho    | 0.010 ppb             | 4,244 cps         |               |
| 166Er    | 0.029 ppb             | 4,151 cps         |               |
| 169Tm    | 0.004 ppb             | 1,693 cps         |               |
| 174Yb    | 0.024 ppb             | 3,727 cps         |               |
| 175Lu    | 0.004 ppb             | 1,677 cps         |               |
| 205Tl    | 0.009 ppb             | 2,217 cps         |               |
| 208Pb    | 1.550 ppb             | 277,794 cps       |               |
| 232Th    | 0.099 ppb             | 29,305 cps        |               |
| 238U     | 0.030 ppb             | 11,613 cps        |               |

## Sample Summary

Instrument ID: iCAP Q

Analysis index: 19

Analysis name: 1502671ti

Analysis started at: 8/24/2021 6:33:07 PM

User name: WINDOWS-UPCI4ER\Administrator

| Category | Concentration average | Concentration RSD |
|----------|-----------------------|-------------------|
| 9Be      | 0.022 ppb             |                   |
| 11B      | 20.133 ppb            |                   |
| 23Na     | 940.913 ppb           |                   |
| 24Mg     | 721.223 ppb           |                   |
| 27Al     | 838.103 ppb           |                   |
| 31P      | 737.104 ppb           |                   |
| 32S      | 574,944.131 ppb       |                   |
| 39K      | 4,262.387 ppb         |                   |
| 40Ca     | 95.465 ppb            |                   |
| 51V      | 1.944 ppb             |                   |
| 52Cr     | 2.641 ppb             |                   |
| 55Mn     | 24.354 ppb            |                   |
| 56Fe     | 719.189 ppb           |                   |
| 58Ni     | 8.505 ppb             |                   |
| 59Co     | 0.419 ppb             |                   |
| 63Cu     | 15.397 ppb            |                   |
| 64Zn     | 156.091 ppb           |                   |
| 69Ga     | 0.885 ppb             |                   |
| 75As     | 0.890 ppb             |                   |
| 80Se     | 49.672 ppb            |                   |
| 85Rb     | 3.755 ppb             |                   |
| 88Sr     | 9.993 ppb             |                   |
| 107Ag    | 0.301 ppb             |                   |
| 114Cd    | 0.578 ppb             |                   |
| 133Cs    | 0.163 ppb             |                   |
| 138Ba    | 18.236 ppb            |                   |
| 139La    | 0.766 ppb             |                   |
| 140Ce    | 1.540 ppb             |                   |
| 141Pr    | 0.187 ppb             |                   |
| 142Nd    | 0.944 ppb             |                   |
| 152Sm    | 0.160 ppb             |                   |
| 153Eu    | 0.032 ppb             |                   |
| 158Gd    | 0.272 ppb             |                   |
| 164Dy    | 0.102 ppb             |                   |
| 165Ho    | 0.017 ppb             |                   |
| 166Er    | 0.181 ppb             |                   |
| 169Tm    | 0.007 ppb             |                   |
| 174Yb    | 0.038 ppb             |                   |
| 175Lu    | 0.005 ppb             |                   |
| 205Tl    | 0.017 ppb             |                   |
| 208Pb    | 1.830 ppb             |                   |
| 232Th    | 0.141 ppb             |                   |
| 238U     | 0.043 ppb             |                   |

| Category | Concentration average | Intensity average | Intensity RSD |
|----------|-----------------------|-------------------|---------------|
| 9Be      | 0.022 ppb             | 433 cps           |               |
| 11B      | 20.133 ppb            | 563,582 cps       |               |
| 23Na     | 940.913 ppb           | 148,458,283 cps   |               |
| 24Mg     | 721.223 ppb           | 47,608,521 cps    |               |
| 27Al     | 838.103 ppb           | 71,456,978 cps    |               |

| Category | Concentration average | Intensity average | Intensity RSD |
|----------|-----------------------|-------------------|---------------|
| 31P      | 737.104 ppb           | 3,477,179 cps     |               |
| 32S      | 574,944.131 ppb       | 890,100,862 cps   |               |
| 39K      | 4,262.387 ppb         | 427,905,558 cps   |               |
| 40Ca     | 95.465 ppb            | 2,567,723,862 cps |               |
| 51V      | 1.944 ppb             | 155,818 cps       |               |
| 52Cr     | 2.641 ppb             | 250,647 cps       |               |
| 55Mn     | 24.354 ppb            | 3,478,661 cps     |               |
| 56Fe     | 719.189 ppb           | 93,077,471 cps    |               |
| 58Ni     | 8.505 ppb             | 380,563 cps       |               |
| 59Co     | 0.419 ppb             | 40,607 cps        |               |
| 63Cu     | 15.397 ppb            | 646,915 cps       |               |
| 64Zn     | 156.091 ppb           | 4,056,713 cps     |               |
| 69Ga     | 0.885 ppb             | 97,257 cps        |               |
| 75As     | 0.890 ppb             | 10,881 cps        |               |
| 80Se     | 49.672 ppb            | 7,468,068 cps     |               |
| 85Rb     | 3.755 ppb             | 491,877 cps       |               |
| 88Sr     | 9.993 ppb             | 1,843,553 cps     |               |
| 107Ag    | 0.301 ppb             | 26,789 cps        |               |
| 114Cd    | 0.578 ppb             | 29,241 cps        |               |
| 133Cs    | 0.163 ppb             | 37,105 cps        |               |
| 138Ba    | 18.236 ppb            | 3,657,223 cps     |               |
| 139La    | 0.766 ppb             | 156,721 cps       |               |
| 140Ce    | 1.540 ppb             | 331,443 cps       |               |
| 141Pr    | 0.187 ppb             | 62,654 cps        |               |
| 142Nd    | 0.944 ppb             | 115,267 cps       |               |
| 152Sm    | 0.160 ppb             | 17,192 cps        |               |
| 153Eu    | 0.032 ppb             | 7,085 cps         |               |
| 158Gd    | 0.272 ppb             | 25,974 cps        |               |
| 164Dy    | 0.102 ppb             | 13,224 cps        |               |
| 165Ho    | 0.017 ppb             | 7,376 cps         |               |
| 166Er    | 0.181 ppb             | 26,151 cps        |               |
| 169Tm    | 0.007 ppb             | 2,967 cps         |               |
| 174Yb    | 0.038 ppb             | 5,971 cps         |               |
| 175Lu    | 0.005 ppb             | 2,487 cps         |               |
| 205Tl    | 0.017 ppb             | 4,271 cps         |               |
| 208Pb    | 1.830 ppb             | 327,479 cps       |               |
| 232Th    | 0.141 ppb             | 41,526 cps        |               |
| 238U     | 0.043 ppb             | 16,441 cps        |               |
