# Supplementary material for: Geographic and breed-specific traceability of cashmere via mineral element profiling in Inner Mongolia (Ordos, Chifeng, and Alxa League)
Source: Royal Society of Chemistry journal article supplement (doi:10.1039/d5ra08122j), 2026-01-01
Supplement: d5ra08122j1.zip [file 20210825-a you qi,ya bu lai zhen.pdf › ԭʼ޿/20210825-a you qi,ya bu lai zhen.pdf]

## Instrument Summary:

Instrument ID: iCAP Q  
Serial Number: Undefined

## Labbook Summary:

Path and filename: \_Application Data\Workspace\LabBooks\wlw\20210825-1.imexp  
Labbook created by: Administrator  
Based on template:  
Hardware configuration: iCAPQ1  
Labbook type: eQuant  
Qtegra version (last saved): 2.7.2425.154  
Labbook started: 8/25/2021 4:45:06 PM  
Labbook finished: 8/25/2021 5:29:38 PM

## Method Summary:

| Isotope | Mode | Dwell time (s) | # of Channels | Spacing | Resolution | IS |
|---------|------|----------------|---------------|---------|------------|----|
| 9Be     | STD  | 0.03           | 3             | 0.1     | Normal     |    |
| 11B     | STD  | 0.03           | 3             | 0.1     | Normal     |    |
| 24Mg    | STD  | 0.03           | 3             | 0.1     | Normal     |    |
| 27Al    | STD  | 0.03           | 3             | 0.1     | Normal     |    |
| 40Ca    | STD  | 0.03           | 3             | 0.1     | Normal     |    |
| 51V     | STD  | 0.03           | 3             | 0.1     | Normal     |    |
| 52Cr    | STD  | 0.03           | 3             | 0.1     | Normal     |    |
| 55Mn    | STD  | 0.03           | 3             | 0.1     | Normal     |    |
| 56Fe    | STD  | 0.03           | 3             | 0.1     | Normal     |    |
| 58Ni    | STD  | 0.03           | 3             | 0.1     | Normal     |    |
| 59Co    | STD  | 0.03           | 3             | 0.1     | Normal     |    |
| 63Cu    | STD  | 0.03           | 3             | 0.1     | Normal     |    |
| 64Zn    | STD  | 0.03           | 3             | 0.1     | Normal     |    |
| 69Ga    | STD  | 0.03           | 3             | 0.1     | Normal     |    |
| 75As    | STD  | 0.03           | 3             | 0.1     | Normal     |    |
| 80Se    | STD  | 0.03           | 3             | 0.1     | Normal     |    |
| 85Rb    | STD  | 0.03           | 3             | 0.1     | Normal     |    |
| 88Sr    | STD  | 0.03           | 3             | 0.1     | Normal     |    |
| 107Ag   | STD  | 0.03           | 3             | 0.1     | Normal     |    |
| 114Cd   | STD  | 0.03           | 3             | 0.1     | Normal     |    |
| 133Cs   | STD  | 0.03           | 3             | 0.1     | Normal     |    |
| 138Ba   | STD  | 0.03           | 3             | 0.1     | Normal     |    |
| 139La   | STD  | 0.03           | 3             | 0.1     | Normal     |    |
| 140Ce   | STD  | 0.03           | 3             | 0.1     | Normal     |    |
| 141Pr   | STD  | 0.03           | 3             | 0.1     | Normal     |    |
| 142Nd   | STD  | 0.03           | 3             | 0.1     | Normal     |    |
| 152Sm   | STD  | 0.03           | 3             | 0.1     | Normal     |    |
| 153Eu   | STD  | 0.03           | 3             | 0.1     | Normal     |    |
| 158Gd   | STD  | 0.03           | 3             | 0.1     | Normal     |    |
| 164Dy   | STD  | 0.03           | 3             | 0.1     | Normal     |    |
| 165Ho   | STD  | 0.03           | 3             | 0.1     | Normal     |    |
| 166Er   | STD  | 0.03           | 3             | 0.1     | Normal     |    |
| 169Tm   | STD  | 0.03           | 3             | 0.1     | Normal     |    |
| 174Yb   | STD  | 0.03           | 3             | 0.1     | Normal     |    |
| 175Lu   | STD  | 0.03           | 3             | 0.1     | Normal     |    |
| 205Tl   | STD  | 0.03           | 3             | 0.1     | Normal     |    |
| 208Pb   | STD  | 0.03           | 3             | 0.1     | Normal     |    |
| 232Th   | STD  | 0.03           | 3             | 0.1     | Normal     |    |
| 238U    | STD  | 0.03           | 3             | 0.1     | Normal     |    |

| Isotope | Mode | Dwell time (s) | # of Channels | Spacing | Resolution |
|---------|------|----------------|---------------|---------|------------|
| 9Be     | STD  | 0.03           | 3             | 0.1     | Normal     |
| 11B     | STD  | 0.03           | 3             | 0.1     | Normal     |
| 24Mg    | STD  | 0.03           | 3             | 0.1     | Normal     |
| 27Al    | STD  | 0.03           | 3             | 0.1     | Normal     |
| 40Ca    | STD  | 0.03           | 3             | 0.1     | Normal     |
| 51V     | STD  | 0.03           | 3             | 0.1     | Normal     |
| 52Cr    | STD  | 0.03           | 3             | 0.1     | Normal     |
| 55Mn    | STD  | 0.03           | 3             | 0.1     | Normal     |
| 56Fe    | STD  | 0.03           | 3             | 0.1     | Normal     |
| 58Ni    | STD  | 0.03           | 3             | 0.1     | Normal     |
| 59Co    | STD  | 0.03           | 3             | 0.1     | Normal     |
| 63Cu    | STD  | 0.03           | 3             | 0.1     | Normal     |
| 64Zn    | STD  | 0.03           | 3             | 0.1     | Normal     |
| 69Ga    | STD  | 0.03           | 3             | 0.1     | Normal     |
| 75As    | STD  | 0.03           | 3             | 0.1     | Normal     |
| 80Se    | STD  | 0.03           | 3             | 0.1     | Normal     |

| Isotope | Mode | Dwell time (s) | # of Channels | Spacing | Resolution |
|---------|------|----------------|---------------|---------|------------|
| 85Rb    | STD  | 0.03           | 3             | 0.1     | Normal     |
| 88Sr    | STD  | 0.03           | 3             | 0.1     | Normal     |
| 107Ag   | STD  | 0.03           | 3             | 0.1     | Normal     |
| 114Cd   | STD  | 0.03           | 3             | 0.1     | Normal     |
| 133Cs   | STD  | 0.03           | 3             | 0.1     | Normal     |
| 138Ba   | STD  | 0.03           | 3             | 0.1     | Normal     |
| 139La   | STD  | 0.03           | 3             | 0.1     | Normal     |
| 140Ce   | STD  | 0.03           | 3             | 0.1     | Normal     |
| 141Pr   | STD  | 0.03           | 3             | 0.1     | Normal     |
| 142Nd   | STD  | 0.03           | 3             | 0.1     | Normal     |
| 152Sm   | STD  | 0.03           | 3             | 0.1     | Normal     |
| 153Eu   | STD  | 0.03           | 3             | 0.1     | Normal     |
| 158Gd   | STD  | 0.03           | 3             | 0.1     | Normal     |
| 164Dy   | STD  | 0.03           | 3             | 0.1     | Normal     |
| 165Ho   | STD  | 0.03           | 3             | 0.1     | Normal     |
| 166Er   | STD  | 0.03           | 3             | 0.1     | Normal     |
| 169Tm   | STD  | 0.03           | 3             | 0.1     | Normal     |
| 174Yb   | STD  | 0.03           | 3             | 0.1     | Normal     |
| 175Lu   | STD  | 0.03           | 3             | 0.1     | Normal     |
| 205Tl   | STD  | 0.03           | 3             | 0.1     | Normal     |
| 208Pb   | STD  | 0.03           | 3             | 0.1     | Normal     |
| 232Th   | STD  | 0.03           | 3             | 0.1     | Normal     |
| 238U    | STD  | 0.03           | 3             | 0.1     | Normal     |

| No. of sweeps | Time per sweep[s] | Time per main run[s] |
|---------------|-------------------|----------------------|
| 10            | 3.51              | 35.1                 |

## Calibration Curves:

9Be

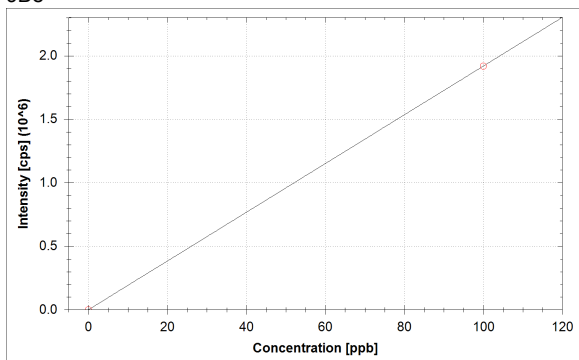

$$f(x) = 19185.8427 \cdot x + 13.3334$$

$$R^2 = 1.0000$$

$$\text{BEC} = 0.001 \text{ ppb}$$

$$\text{LoD} = \text{N/A}$$

11B

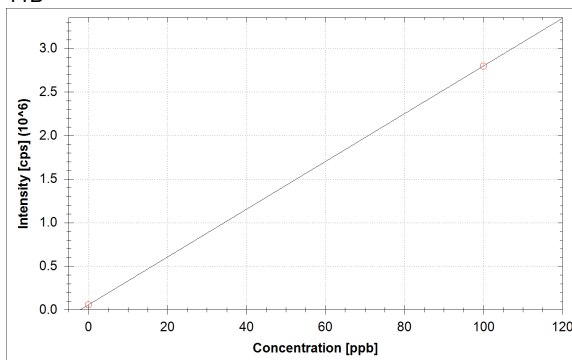

$$f(x) = 27408.4596 \cdot x + 56163.1320$$

$$R^2 = 1.0000$$

$$\text{BEC} = 2.049 \text{ ppb}$$

$$\text{LoD} = \text{N/A}$$

24Mg

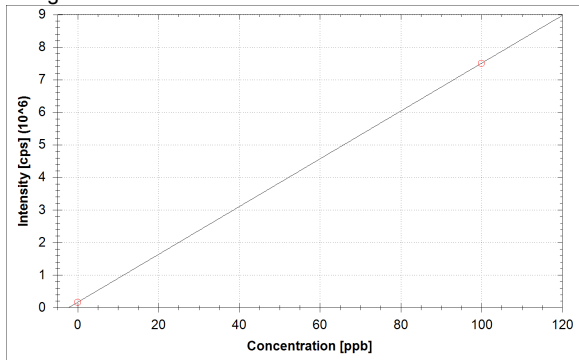

$$f(x) = 73423.7561 \cdot x + 162316.0552$$

$$R^2 = 1.0000$$

$$\text{BEC} = 2.211 \text{ ppb}$$

$$\text{LoD} = \text{N/A}$$

27Al

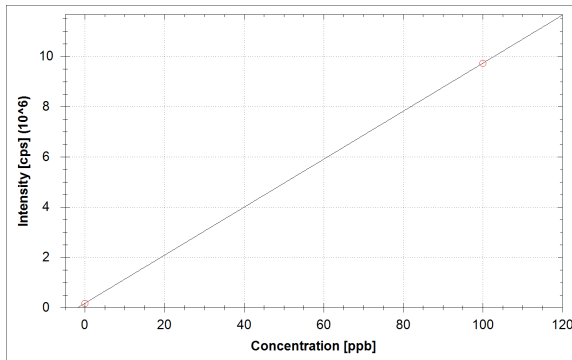

$$f(x) = 95587.4756 \cdot x + 170154.1183$$

$$R^2 = 1.0000$$

$$\text{BEC} = 1.780 \text{ ppb}$$

$$\text{LoD} = \text{N/A}$$

40Ca

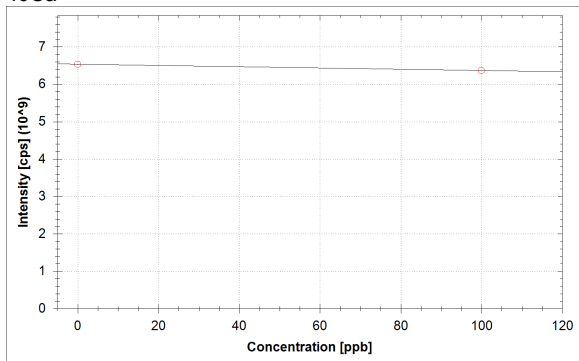

$$f(x) = -1680655.3602 \cdot x + 6535398243.6327$$

$$R^2 = 1.0000$$

$$\text{BEC} = -3888.601 \text{ ppb}$$

$$\text{LoD} = \text{N/A}$$

51V

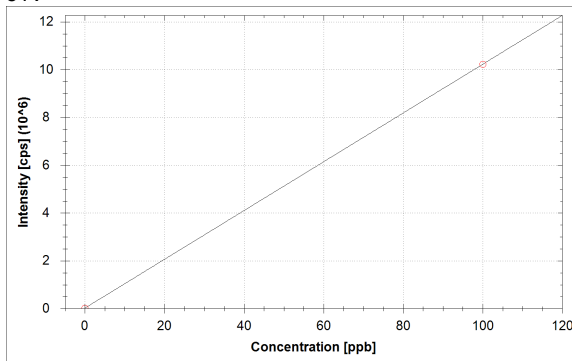

$$f(x) = 102091.1490 \cdot x + 17308.7060$$

$$R^2 = 1.0000$$

$$\text{BEC} = 0.170 \text{ ppb}$$

$$\text{LoD} = \text{N/A}$$

52Cr

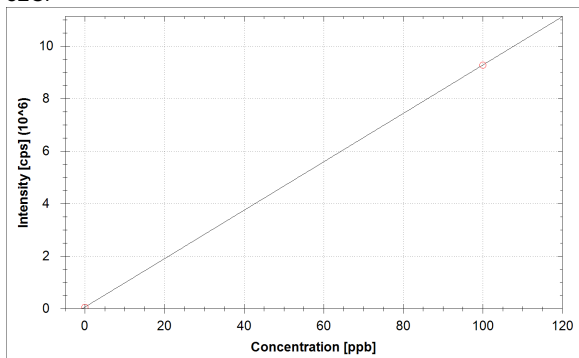

$$f(x) = 92212.8762 \cdot x + 59786.1683$$

$$R^2 = 1.0000$$

$$\text{BEC} = 0.648 \text{ ppb}$$

$$\text{LoD} = \text{N/A}$$

55Mn

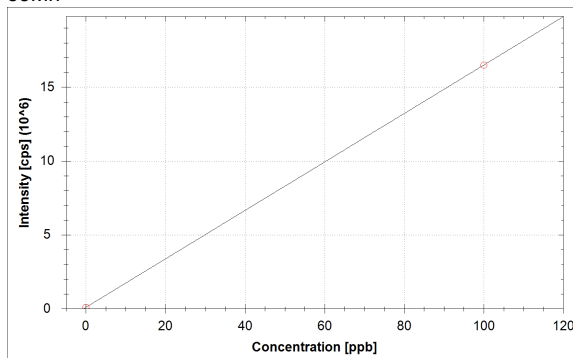

$$f(x) = 163998.4465 \cdot x + 91145.1495$$

$$R^2 = 1.0000$$

$$\text{BEC} = 0.556 \text{ ppb}$$

$$\text{LoD} = \text{N/A}$$

56Fe

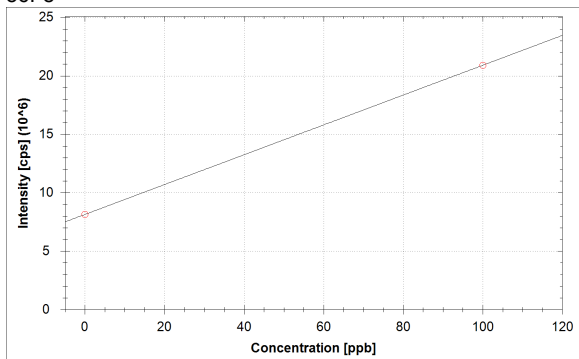

$$f(x) = 127639.2469 \cdot x + 8137982.9850$$

$$R^2 = 1.0000$$

$$\text{BEC} = 63.758 \text{ ppb}$$

$$\text{LoD} = \text{N/A}$$

58Ni

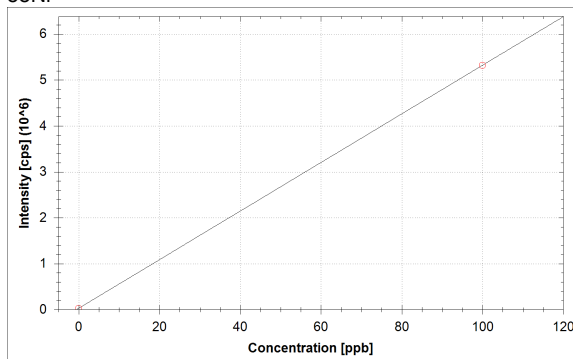

$$f(x) = 52950.8521 \cdot x + 26912.3204$$

$$R^2 = 1.0000$$

$$\text{BEC} = 0.508 \text{ ppb}$$

$$\text{LoD} = \text{N/A}$$

59Co

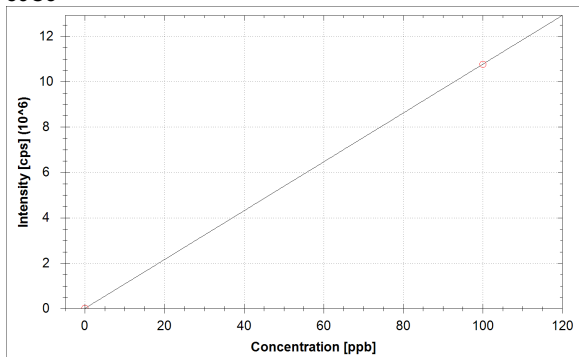

$$f(x) = 107612.9929 \cdot x + 4960.9947$$

$$R^2 = 1.0000$$

$$\text{BEC} = 0.046 \text{ ppb}$$

$$\text{LoD} = \text{N/A}$$

63Cu

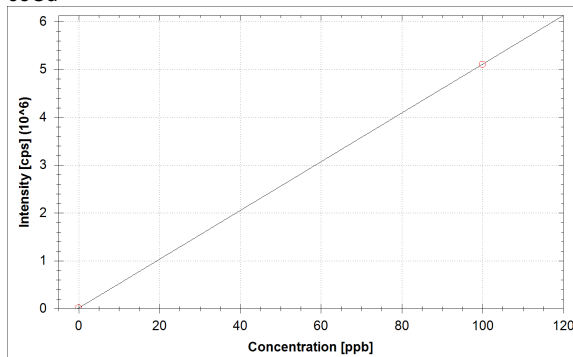

$$f(x) = 50985.7185 \cdot x + 10330.9652$$

$$R^2 = 1.0000$$

$$\text{BEC} = 0.203 \text{ ppb}$$

$$\text{LoD} = \text{N/A}$$

64Zn

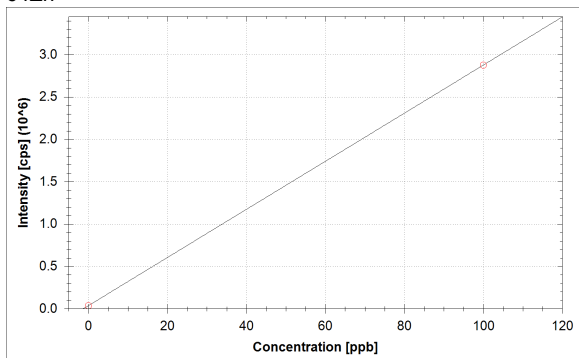

$$f(x) = 28399.1551 \cdot x + 36727.2743$$

$$R^2 = 1.0000$$

$$\text{BEC} = 1.293 \text{ ppb}$$

$$\text{LoD} = \text{N/A}$$

69Ga

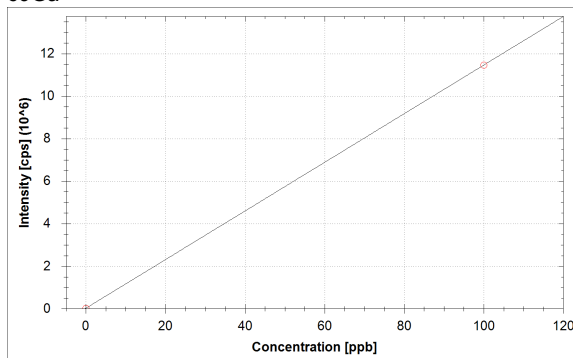

$$f(x) = 114372.4102 \cdot x + 21248.1959$$

$$R^2 = 1.0000$$

$$\text{BEC} = 0.186 \text{ ppb}$$

$$\text{LoD} = \text{N/A}$$

75As

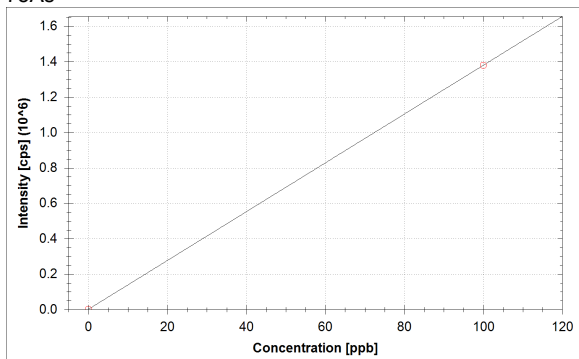

$$f(x) = 13785.2927 \cdot x + 1610.1057$$

$$R^2 = 1.0000$$

$$\text{BEC} = 0.117 \text{ ppb}$$

$$\text{LoD} = \text{N/A}$$

80Se

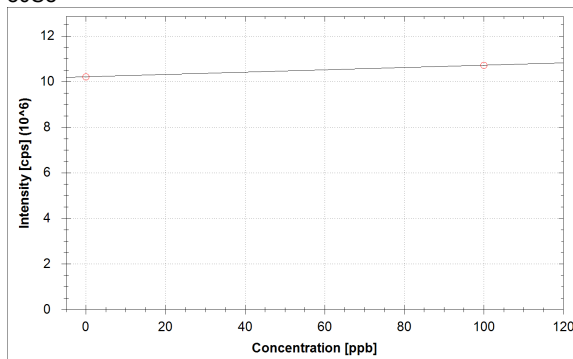

$$f(x) = 5072.1003 \cdot x + 10206898.7330$$

$$R^2 = 1.0000$$

$$\text{BEC} = 2012.361 \text{ ppb}$$

$$\text{LoD} = \text{N/A}$$

85Rb

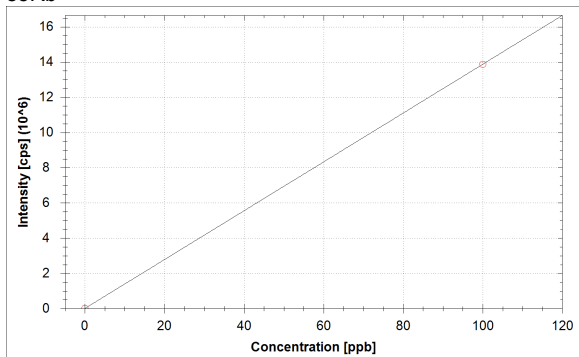

$$f(x) = 138693.9263 \cdot x + 5397.8476$$

$$R^2 = 1.0000$$

$$\text{BEC} = 0.039 \text{ ppb}$$

$$\text{LoD} = \text{N/A}$$

88Sr

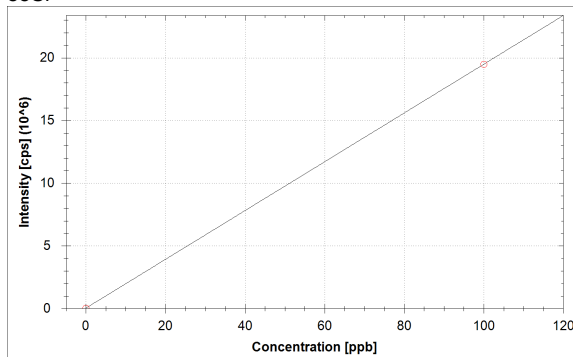

$$f(x) = 194516.3328 \cdot x + 31235.7436$$

$$R^2 = 1.0000$$

$$\text{BEC} = 0.161 \text{ ppb}$$

$$\text{LoD} = \text{N/A}$$

107Ag

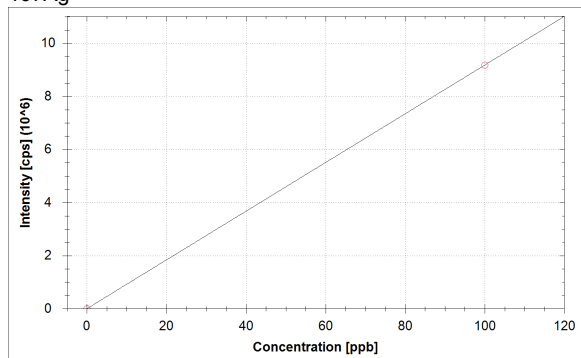

$$f(x) = 91764.2473 \cdot x + 2656.9523$$

$$R^2 = 1.0000$$

$$\text{BEC} = 0.029 \text{ ppb}$$

$$\text{LoD} = \text{N/A}$$

114Cd

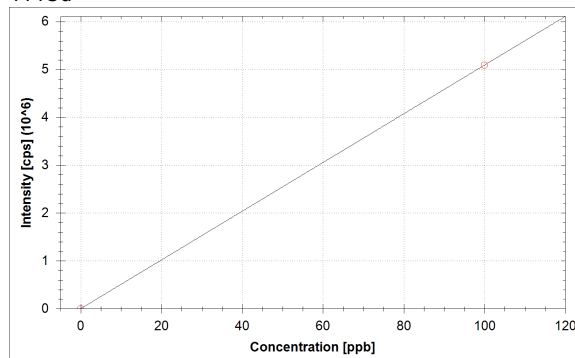

$$f(x) = 50916.8771 \cdot x + 1293.4020$$

$$R^2 = 1.0000$$

$$\text{BEC} = 0.025 \text{ ppb}$$

$$\text{LoD} = \text{N/A}$$

133Cs

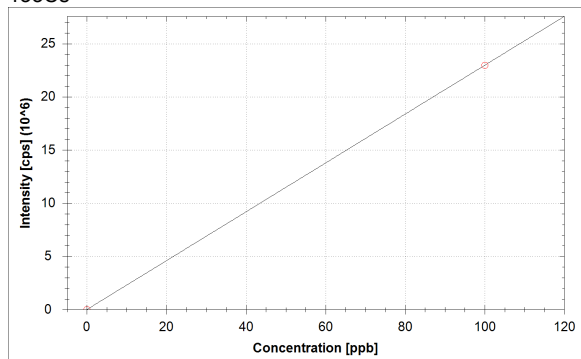

$$f(x) = 229723.4417 \cdot x + 366.6722$$

$$R^2 = 1.0000$$

$$\text{BEC} = 0.002 \text{ ppb}$$

$$\text{LoD} = \text{N/A}$$

138Ba

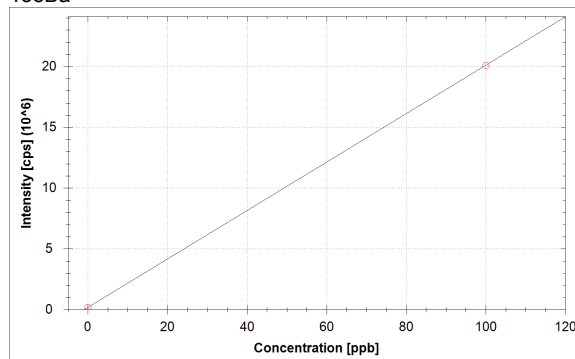

$$f(x) = 199315.4575 \cdot x + 170717.7707$$

$$R^2 = 1.0000$$

$$\text{BEC} = 0.857 \text{ ppb}$$

$$\text{LoD} = \text{N/A}$$

139La

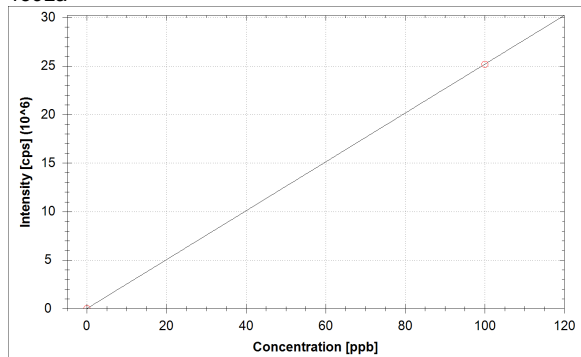

$$f(x) = 251751.2398 \cdot x + 310.0041$$

$$R^2 = 1.0000$$

$$\text{BEC} = 0.001 \text{ ppb}$$

$$\text{LoD} = \text{N/A}$$

140Ce

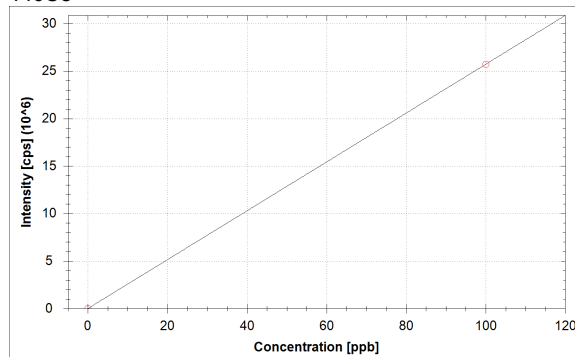

$$f(x) = 257152.4207 \cdot x + 740.0228$$

$$R^2 = 1.0000$$

$$\text{BEC} = 0.003 \text{ ppb}$$

$$\text{LoD} = \text{N/A}$$

141Pr

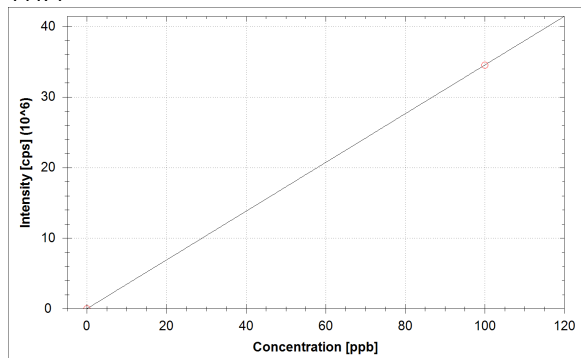

$$f(x) = 345242.5587x + 146.6676$$

$$R^2 = 1.0000$$

$$\text{BEC} = 0.000 \text{ ppb}$$

$$\text{LoD} = \text{N/A}$$

142Nd

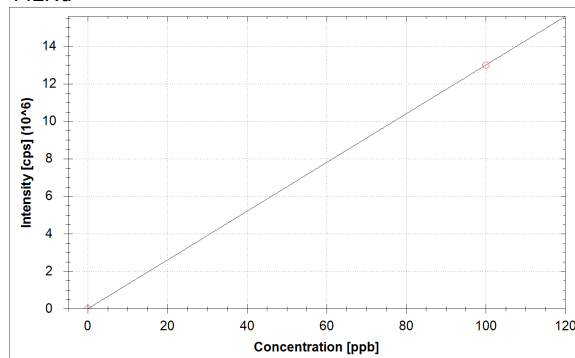

$$f(x) = 129968.1113x + 203.3352$$

$$R^2 = 1.0000$$

$$\text{BEC} = 0.002 \text{ ppb}$$

$$\text{LoD} = \text{N/A}$$

152Sm

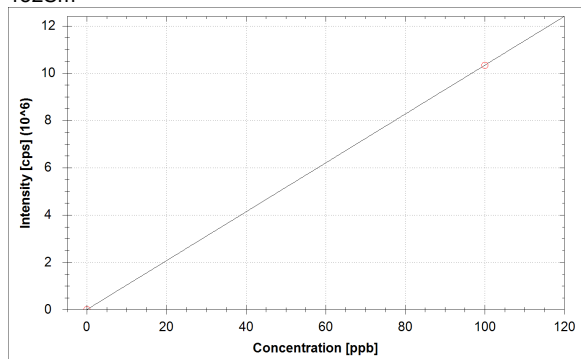

$$f(x) = 103336.6998x + 50.0002$$

$$R^2 = 1.0000$$

$$\text{BEC} = 0.000 \text{ ppb}$$

$$\text{LoD} = \text{N/A}$$

153Eu

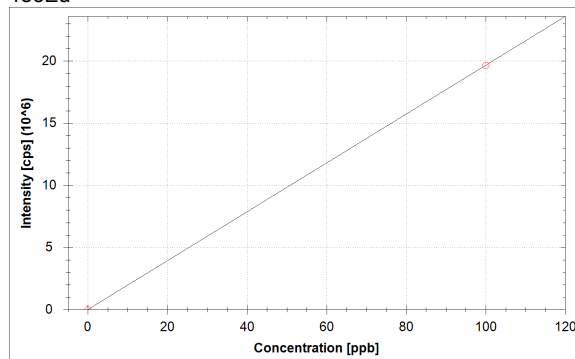

$$f(x) = 196602.2174x + 66.6669$$

$$R^2 = 1.0000$$

$$\text{BEC} = 0.000 \text{ ppb}$$

$$\text{LoD} = \text{N/A}$$

158Gd

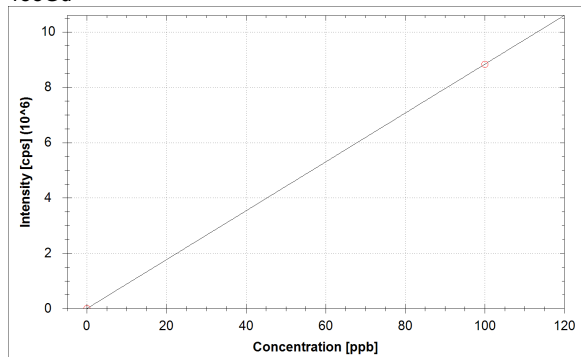

$$f(x) = 88301.4580x + 16.6667$$

$$R^2 = 1.0000$$

$$\text{BEC} = 0.000 \text{ ppb}$$

$$\text{LoD} = \text{N/A}$$

164Dy

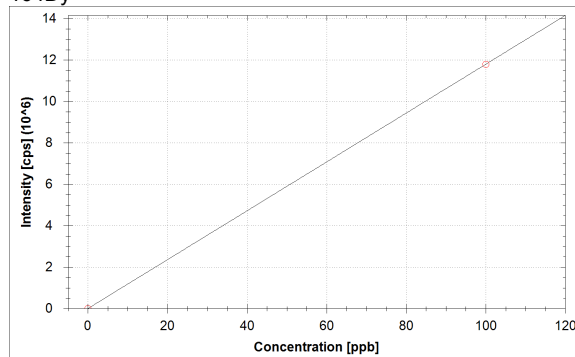

$$f(x) = 117938.0197x + 120.0007$$

$$R^2 = 1.0000$$

$$\text{BEC} = 0.001 \text{ ppb}$$

$$\text{LoD} = \text{N/A}$$

**<sup>165</sup>Ho**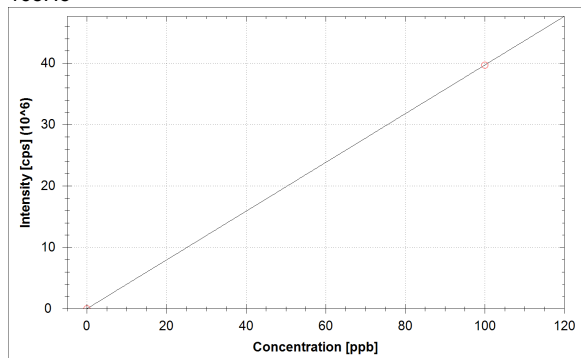

$$f(x) = 396767.2019 \cdot x + 33.3334$$

$$R^2 = 1.0000$$

$$\text{BEC} = 0.000 \text{ ppb}$$

$$\text{LoD} = \text{N/A}$$

**<sup>166</sup>Er**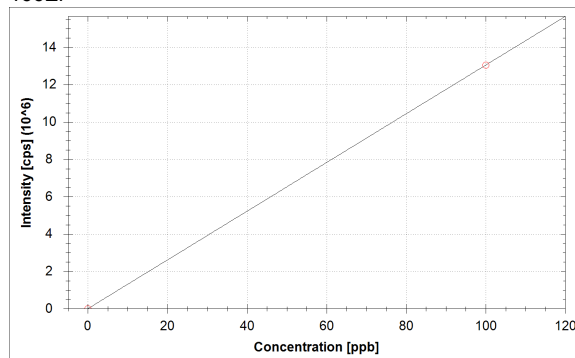

$$f(x) = 130458.3905 \cdot x + 2610.3146$$

$$R^2 = 1.0000$$

$$\text{BEC} = 0.020 \text{ ppb}$$

$$\text{LoD} = \text{N/A}$$

**<sup>169</sup>Tm**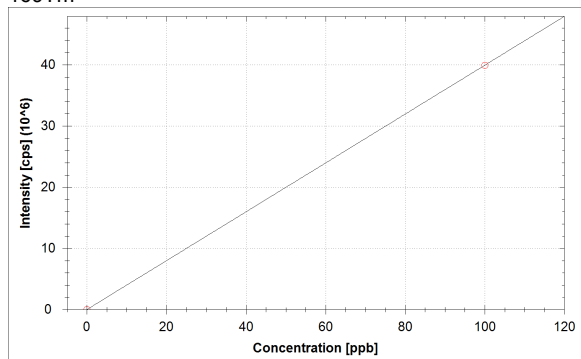

$$f(x) = 399199.0891 \cdot x + 66.6669$$

$$R^2 = 1.0000$$

$$\text{BEC} = 0.000 \text{ ppb}$$

$$\text{LoD} = \text{N/A}$$

**<sup>174</sup>Yb**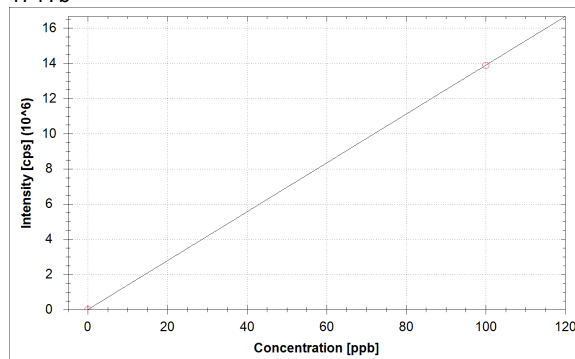

$$f(x) = 138903.5780 \cdot x + 13.3334$$

$$R^2 = 1.0000$$

$$\text{BEC} = 0.000 \text{ ppb}$$

$$\text{LoD} = \text{N/A}$$

**<sup>175</sup>Lu**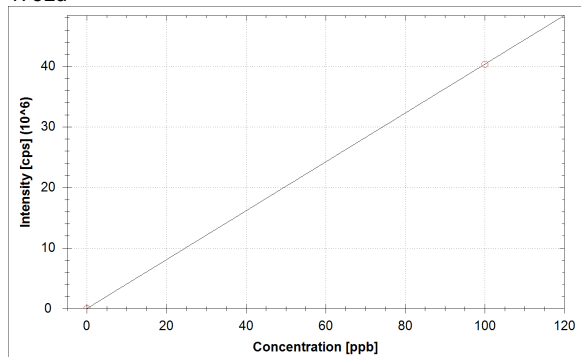

$$f(x) = 403252.3754 \cdot x + 23.3334$$

$$R^2 = 1.0000$$

$$\text{BEC} = 0.000 \text{ ppb}$$

$$\text{LoD} = \text{N/A}$$

**<sup>205</sup>Tl**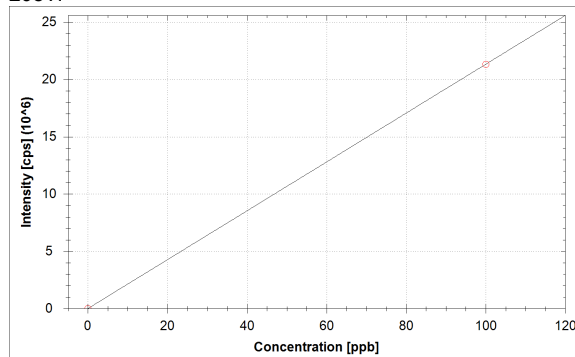

$$f(x) = 213310.1975 \cdot x + 10.0000$$

$$R^2 = 1.0000$$

$$\text{BEC} = 0.000 \text{ ppb}$$

$$\text{LoD} = \text{N/A}$$

208Pb

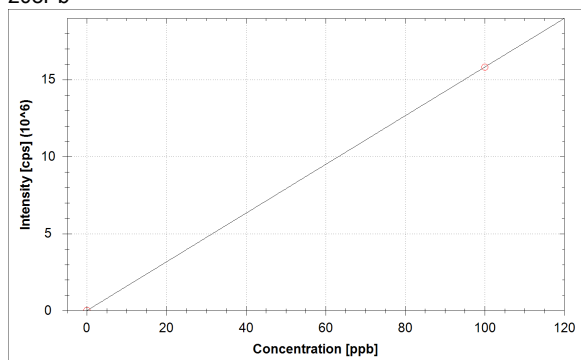

$$f(x) = 158083.2008 \cdot x + 7859.1549$$

$$R^2 = 1.0000$$

$$\text{BEC} = 0.050 \text{ ppb}$$

$$\text{LoD} = \text{N/A}$$

232Th

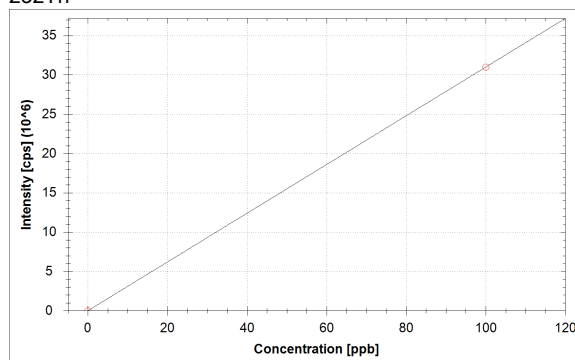

$$f(x) = 309889.5700 \cdot x + 1610.1103$$

$$R^2 = 1.0000$$

$$\text{BEC} = 0.005 \text{ ppb}$$

$$\text{LoD} = \text{N/A}$$

238U

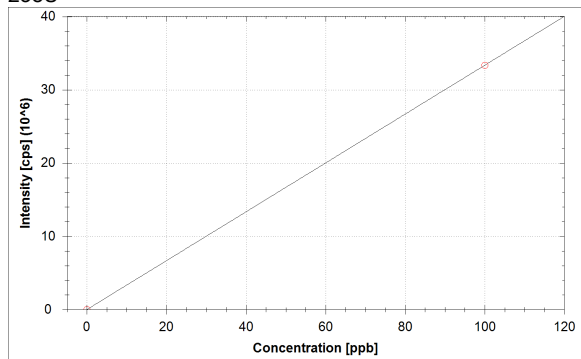

$$f(x) = 333542.6543 \cdot x + 233.3361$$

$$R^2 = 1.0000$$

$$\text{BEC} = 0.001 \text{ ppb}$$

$$\text{LoD} = \text{N/A}$$

**Standards:**

Analysis Index: 3  
Analysis Name: std1  
Analysis Type: STD  
Analysis Started at: 8/25/2021 4:50:27 PM  
Standard (Stock): std1  
Standard DF: 1

| Category | Concentration average | Concentration RSD | Standard Concentration |
|----------|-----------------------|-------------------|------------------------|
| 9Be      | 100.000 ppb           |                   | 100.000 ppb            |
| 11B      | 100.000 ppb           |                   | 100.000 ppb            |
| 24Mg     | 100.000 ppb           |                   | 100.000 ppb            |
| 27Al     | 100.000 ppb           |                   | 100.000 ppb            |
| 40Ca     | 100.000 ppb           |                   | 100.000 ppb            |
| 51V      | 100.000 ppb           |                   | 100.000 ppb            |
| 52Cr     | 100.000 ppb           |                   | 100.000 ppb            |
| 55Mn     | 100.000 ppb           |                   | 100.000 ppb            |
| 56Fe     | 100.000 ppb           |                   | 100.000 ppb            |
| 58Ni     | 100.000 ppb           |                   | 100.000 ppb            |
| 59Co     | 100.000 ppb           |                   | 100.000 ppb            |
| 63Cu     | 100.000 ppb           |                   | 100.000 ppb            |
| 64Zn     | 100.000 ppb           |                   | 100.000 ppb            |
| 69Ga     | 100.000 ppb           |                   | 100.000 ppb            |
| 75As     | 100.000 ppb           |                   | 100.000 ppb            |
| 80Se     | 100.000 ppb           |                   | 100.000 ppb            |
| 85Rb     | 100.000 ppb           |                   | 100.000 ppb            |
| 88Sr     | 100.000 ppb           |                   | 100.000 ppb            |
| 107Ag    | 100.000 ppb           |                   | 100.000 ppb            |
| 114Cd    | 100.000 ppb           |                   | 100.000 ppb            |
| 133Cs    | 100.000 ppb           |                   | 100.000 ppb            |
| 138Ba    | 100.000 ppb           |                   | 100.000 ppb            |
| 139La    | 100.000 ppb           |                   | 100.000 ppb            |
| 140Ce    | 100.000 ppb           |                   | 100.000 ppb            |
| 141Pr    | 100.000 ppb           |                   | 100.000 ppb            |
| 142Nd    | 100.000 ppb           |                   | 100.000 ppb            |
| 152Sm    | 100.000 ppb           |                   | 100.000 ppb            |
| 153Eu    | 100.000 ppb           |                   | 100.000 ppb            |
| 158Gd    | 100.000 ppb           |                   | 100.000 ppb            |
| 164Dy    | 100.000 ppb           |                   | 100.000 ppb            |
| 165Ho    | 100.000 ppb           |                   | 100.000 ppb            |
| 166Er    | 100.000 ppb           |                   | 100.000 ppb            |
| 169Tm    | 100.000 ppb           |                   | 100.000 ppb            |
| 174Yb    | 100.000 ppb           |                   | 100.000 ppb            |
| 175Lu    | 100.000 ppb           |                   | 100.000 ppb            |
| 205Tl    | 100.000 ppb           |                   | 100.000 ppb            |
| 208Pb    | 100.000 ppb           |                   | 100.000 ppb            |
| 232Th    | 100.000 ppb           |                   | 100.000 ppb            |
| 238U     | 100.000 ppb           |                   | 100.000 ppb            |

## Sample List Summary:

Instrument ID: iCAP Q

| Index: | Label:     | Main<br>Runs: | Survey<br>Runs: | Start Time:          | User name:                    |
|--------|------------|---------------|-----------------|----------------------|-------------------------------|
| 1      | water      | 3             | 0               | 8/25/2021 4:45:10 PM | WINDOWS-UPCI4ER\Administrator |
| 2      | blk        | 1             | 0               | 8/25/2021 4:48:07 PM | WINDOWS-UPCI4ER\Administrator |
| 3      | std1       | 1             | 0               | 8/25/2021 4:50:27 PM | WINDOWS-UPCI4ER\Administrator |
| 4      | 179212jian | 1             | 0               | 8/25/2021 4:52:37 PM | WINDOWS-UPCI4ER\Administrator |
| 5      | 04675jian  | 1             | 0               | 8/25/2021 4:54:35 PM | WINDOWS-UPCI4ER\Administrator |
| 6      | 045713jian | 1             | 0               | 8/25/2021 4:56:25 PM | WINDOWS-UPCI4ER\Administrator |
| 7      | 046754jian | 1             | 0               | 8/25/2021 4:58:22 PM | WINDOWS-UPCI4ER\Administrator |
| 8      | 046747jian | 1             | 0               | 8/25/2021 5:00:22 PM | WINDOWS-UPCI4ER\Administrator |
| 9      | 051946jian | 1             | 0               | 8/25/2021 5:02:10 PM | WINDOWS-UPCI4ER\Administrator |
| 10     | 046317jian | 1             | 0               | 8/25/2021 5:04:06 PM | WINDOWS-UPCI4ER\Administrator |
| 11     | 033892jian | 1             | 0               | 8/25/2021 5:06:01 PM | WINDOWS-UPCI4ER\Administrator |
| 12     | 046757jian | 1             | 0               | 8/25/2021 5:07:48 PM | WINDOWS-UPCI4ER\Administrator |
| 13     | 046314jian | 1             | 0               | 8/25/2021 5:09:35 PM | WINDOWS-UPCI4ER\Administrator |
| 14     | 179396jian | 1             | 0               | 8/25/2021 5:11:24 PM | WINDOWS-UPCI4ER\Administrator |
| 15     | 046288jian | 1             | 0               | 8/25/2021 5:13:18 PM | WINDOWS-UPCI4ER\Administrator |
| 16     | 179421jian | 1             | 0               | 8/25/2021 5:15:04 PM | WINDOWS-UPCI4ER\Administrator |
| 17     | 04745jian  | 1             | 0               | 8/25/2021 5:16:54 PM | WINDOWS-UPCI4ER\Administrator |
| 18     | 04628ti    | 1             | 0               | 8/25/2021 5:18:41 PM | WINDOWS-UPCI4ER\Administrator |
| 19     | 033892ti   | 1             | 0               | 8/25/2021 5:20:26 PM | WINDOWS-UPCI4ER\Administrator |
| 20     | 046750ti   | 1             | 0               | 8/25/2021 5:22:12 PM | WINDOWS-UPCI4ER\Administrator |
| 21     | 179212ti   | 1             | 0               | 8/25/2021 5:23:58 PM | WINDOWS-UPCI4ER\Administrator |
| 22     | 15028jian  | 1             | 0               | 8/25/2021 5:25:45 PM | WINDOWS-UPCI4ER\Administrator |
| 23     | 15024jian  | 1             | 0               | 8/25/2021 5:27:36 PM | WINDOWS-UPCI4ER\Administrator |

## Sample Summary

Instrument ID: iCAP Q

Analysis index: 1

Analysis name: water

Analysis started at: 8/25/2021 4:45:10 PM

User name: WINDOWS-UPCI4ER\Administrator

| Category | Concentration average | Concentration RSD |
|----------|-----------------------|-------------------|
| 9Be      | 0.000 ppb             | 229.1 %           |
| 11B      | -1.971 ppb            | 0.2 %             |
| 24Mg     | -2.144 ppb            | 0.0 %             |
| 27Al     | -1.175 ppb            | 1.6 %             |
| 40Ca     | -436.015 ppb          | 8.9 %             |
| 51V      | -0.016 ppb            | 40.4 %            |
| 52Cr     | -0.044 ppb            | 3.8 %             |
| 55Mn     | -0.231 ppb            | 1.8 %             |
| 56Fe     | -10.976 ppb           | 12.8 %            |
| 58Ni     | -0.093 ppb            | 4.6 %             |
| 59Co     | 0.000 ppb             | 283.7 %           |
| 63Cu     | -0.178 ppb            | 0.8 %             |
| 64Zn     | -1.121 ppb            | 0.2 %             |
| 69Ga     | -0.014 ppb            | 13.3 %            |
| 75As     | 0.010 ppb             | 48.0 %            |
| 80Se     | 50.239 ppb            | 112.7 %           |
| 85Rb     | -0.004 ppb            | 40.1 %            |
| 88Sr     | -0.158 ppb            | 0.0 %             |
| 107Ag    | -0.024 ppb            | 2.7 %             |
| 114Cd    | -0.023 ppb            | 0.8 %             |
| 133Cs    | -0.001 ppb            | 12.2 %            |
| 138Ba    | -0.852 ppb            | 0.0 %             |
| 139La    | -0.001 ppb            | 1.3 %             |
| 140Ce    | -0.003 ppb            | 1.4 %             |
| 141Pr    | 0.000 ppb             | 26.5 %            |
| 142Nd    | -0.001 ppb            | 3.3 %             |
| 152Sm    | 0.000 ppb             | 65.5 %            |
| 153Eu    | 0.000 ppb             | 66.6 %            |
| 158Gd    | 0.000 ppb             | 86.6 %            |
| 164Dy    | -0.001 ppb            | 1.7 %             |
| 165Ho    | 0.000 ppb             | 74.2 %            |
| 166Er    | -0.020 ppb            | 0.3 %             |
| 169Tm    | 0.000 ppb             | 39.0 %            |
| 174Yb    | 0.000 ppb             | 17.3 %            |
| 175Lu    | 0.000 ppb             | 12.4 %            |
| 205Tl    | 0.000 ppb             |                   |
| 208Pb    | -0.049 ppb            | 0.2 %             |
| 232Th    | -0.005 ppb            | 0.1 %             |
| 238U     | -0.001 ppb            | 0.8 %             |

| Category | Concentration average | Intensity average | Intensity RSD |
|----------|-----------------------|-------------------|---------------|
| 9Be      | 0.000 ppb             | 11 cps            | 45.8 %        |
| 11B      | -1.971 ppb            | 2,139 cps         | 4.2 %         |
| 24Mg     | -2.144 ppb            | 4,869 cps         | 1.1 %         |
| 27Al     | -1.175 ppb            | 57,802 cps        | 3.1 %         |
| 40Ca     | -436.015 ppb          | 7,268,188,783 cps | 0.9 %         |
| 51V      | -0.016 ppb            | 15,705 cps        | 4.1 %         |
| 52Cr     | -0.044 ppb            | 55,687 cps        | 0.3 %         |
| 55Mn     | -0.231 ppb            | 53,330 cps        | 1.2 %         |
| 56Fe     | -10.976 ppb           | 6,736,986 cps     | 2.7 %         |

| Category | Concentration average | Intensity average | Intensity RSD |
|----------|-----------------------|-------------------|---------------|
| 58Ni     | -0.093 ppb            | 21,995 cps        | 1.0 %         |
| 59Co     | 0.000 ppb             | 4,929 cps         | 1.9 %         |
| 63Cu     | -0.178 ppb            | 1,239 cps         | 6.1 %         |
| 64Zn     | -1.121 ppb            | 4,892 cps         | 1.1 %         |
| 69Ga     | -0.014 ppb            | 19,633 cps        | 1.1 %         |
| 75As     | 0.010 ppb             | 1,742 cps         | 3.6 %         |
| 80Se     | 50.239 ppb            | 10,461,715 cps    | 2.7 %         |
| 85Rb     | -0.004 ppb            | 4,799 cps         | 5.0 %         |
| 88Sr     | -0.158 ppb            | 539 cps           | 2.6 %         |
| 107Ag    | -0.024 ppb            | 448 cps           | 13.2 %        |
| 114Cd    | -0.023 ppb            | 144 cps           | 6.7 %         |
| 133Cs    | -0.001 ppb            | 209 cps           | 9.2 %         |
| 138Ba    | -0.852 ppb            | 942 cps           | 2.1 %         |
| 139La    | -0.001 ppb            | 60 cps            | 5.6 %         |
| 140Ce    | -0.003 ppb            | 36 cps            | 28.6 %        |
| 141Pr    | 0.000 ppb             | 113 cps           | 7.8 %         |
| 142Nd    | -0.001 ppb            | 30 cps            | 19.2 %        |
| 152Sm    | 0.000 ppb             | 27 cps            | 57.3 %        |
| 153Eu    | 0.000 ppb             | 52 cps            | 18.4 %        |
| 158Gd    | 0.000 ppb             | 14 cps            | 13.3 %        |
| 164Dy    | -0.001 ppb            | 9 cps             | 21.7 %        |
| 165Ho    | 0.000 ppb             | 19 cps            | 56.7 %        |
| 166Er    | -0.020 ppb            | 10 cps            | 88.2 %        |
| 169Tm    | 0.000 ppb             | 84 cps            | 8.2 %         |
| 174Yb    | 0.000 ppb             | 2 cps             | 86.6 %        |
| 175Lu    | 0.000 ppb             | 8 cps             | 24.7 %        |
| 205Tl    | 0.000 ppb             | 10 cps            | 0.0 %         |
| 208Pb    | -0.049 ppb            | 91 cps            | 15.2 %        |
| 232Th    | -0.005 ppb            | 4 cps             | 43.3 %        |
| 238U     | -0.001 ppb            | 1 cps             | 173.2 %       |

## Sample Summary

Instrument ID: iCAP Q

Analysis index: 2

Analysis name: blk

Analysis started at: 8/25/2021 4:48:07 PM

User name: WINDOWS-UPCI4ER\Administrator

| Category | Concentration average | Concentration RSD |
|----------|-----------------------|-------------------|
| 9Be      | 0.000 ppb             |                   |
| 11B      | 0.000 ppb             |                   |
| 24Mg     | 0.000 ppb             |                   |
| 27Al     | 0.000 ppb             |                   |
| 40Ca     | 0.000 ppb             |                   |
| 51V      | 0.000 ppb             |                   |
| 52Cr     | 0.000 ppb             |                   |
| 55Mn     | 0.000 ppb             |                   |
| 56Fe     | 0.000 ppb             |                   |
| 58Ni     | 0.000 ppb             |                   |
| 59Co     | 0.000 ppb             |                   |
| 63Cu     | 0.000 ppb             |                   |
| 64Zn     | 0.000 ppb             |                   |
| 69Ga     | 0.000 ppb             |                   |
| 75As     | 0.000 ppb             |                   |
| 80Se     | 0.000 ppb             |                   |
| 85Rb     | 0.000 ppb             |                   |
| 88Sr     | 0.000 ppb             |                   |
| 107Ag    | 0.000 ppb             |                   |
| 114Cd    | 0.000 ppb             |                   |
| 133Cs    | 0.000 ppb             |                   |
| 138Ba    | 0.000 ppb             |                   |
| 139La    | 0.000 ppb             |                   |
| 140Ce    | 0.000 ppb             |                   |
| 141Pr    | 0.000 ppb             |                   |
| 142Nd    | 0.000 ppb             |                   |
| 152Sm    | 0.000 ppb             |                   |
| 153Eu    | 0.000 ppb             |                   |
| 158Gd    | 0.000 ppb             |                   |
| 164Dy    | 0.000 ppb             |                   |
| 165Ho    | 0.000 ppb             |                   |
| 166Er    | 0.000 ppb             |                   |
| 169Tm    | 0.000 ppb             |                   |
| 174Yb    | 0.000 ppb             |                   |
| 175Lu    | 0.000 ppb             |                   |
| 205Tl    | 0.000 ppb             |                   |
| 208Pb    | 0.000 ppb             |                   |
| 232Th    | 0.000 ppb             |                   |
| 238U     | 0.000 ppb             |                   |

| Category | Concentration average | Intensity average | Intensity RSD |
|----------|-----------------------|-------------------|---------------|
| 9Be      | 0.000 ppb             | 13 cps            |               |
| 11B      | 0.000 ppb             | 56,163 cps        |               |
| 24Mg     | 0.000 ppb             | 162,316 cps       |               |
| 27Al     | 0.000 ppb             | 170,154 cps       |               |
| 40Ca     | 0.000 ppb             | 6,535,398,244 cps |               |
| 51V      | 0.000 ppb             | 17,309 cps        |               |
| 52Cr     | 0.000 ppb             | 59,786 cps        |               |
| 55Mn     | 0.000 ppb             | 91,145 cps        |               |
| 56Fe     | 0.000 ppb             | 8,137,983 cps     |               |

| Category | Concentration average | Intensity average | Intensity RSD |
|----------|-----------------------|-------------------|---------------|
| 58Ni     | 0.000 ppb             | 26,912 cps        |               |
| 59Co     | 0.000 ppb             | 4,961 cps         |               |
| 63Cu     | 0.000 ppb             | 10,331 cps        |               |
| 64Zn     | 0.000 ppb             | 36,727 cps        |               |
| 69Ga     | 0.000 ppb             | 21,248 cps        |               |
| 75As     | 0.000 ppb             | 1,610 cps         |               |
| 80Se     | 0.000 ppb             | 10,206,899 cps    |               |
| 85Rb     | 0.000 ppb             | 5,398 cps         |               |
| 88Sr     | 0.000 ppb             | 31,236 cps        |               |
| 107Ag    | 0.000 ppb             | 2,657 cps         |               |
| 114Cd    | 0.000 ppb             | 1,293 cps         |               |
| 133Cs    | 0.000 ppb             | 367 cps           |               |
| 138Ba    | 0.000 ppb             | 170,718 cps       |               |
| 139La    | 0.000 ppb             | 310 cps           |               |
| 140Ce    | 0.000 ppb             | 740 cps           |               |
| 141Pr    | 0.000 ppb             | 147 cps           |               |
| 142Nd    | 0.000 ppb             | 203 cps           |               |
| 152Sm    | 0.000 ppb             | 50 cps            |               |
| 153Eu    | 0.000 ppb             | 67 cps            |               |
| 158Gd    | 0.000 ppb             | 17 cps            |               |
| 164Dy    | 0.000 ppb             | 120 cps           |               |
| 165Ho    | 0.000 ppb             | 33 cps            |               |
| 166Er    | 0.000 ppb             | 2,610 cps         |               |
| 169Tm    | 0.000 ppb             | 67 cps            |               |
| 174Yb    | 0.000 ppb             | 13 cps            |               |
| 175Lu    | 0.000 ppb             | 23 cps            |               |
| 205Tl    | 0.000 ppb             | 10 cps            |               |
| 208Pb    | 0.000 ppb             | 7,859 cps         |               |
| 232Th    | 0.000 ppb             | 1,610 cps         |               |
| 238U     | 0.000 ppb             | 233 cps           |               |

## Sample Summary

Instrument ID: iCAP Q

Analysis index: 3

Analysis name: std1

Analysis started at: 8/25/2021 4:50:27 PM

User name: WINDOWS-UPCI4ER\Administrator

| Category | Concentration average | Concentration RSD |
|----------|-----------------------|-------------------|
| 9Be      | 100.000 ppb           |                   |
| 11B      | 100.000 ppb           |                   |
| 24Mg     | 100.000 ppb           |                   |
| 27Al     | 100.000 ppb           |                   |
| 40Ca     | 100.000 ppb           |                   |
| 51V      | 100.000 ppb           |                   |
| 52Cr     | 100.000 ppb           |                   |
| 55Mn     | 100.000 ppb           |                   |
| 56Fe     | 100.000 ppb           |                   |
| 58Ni     | 100.000 ppb           |                   |
| 59Co     | 100.000 ppb           |                   |
| 63Cu     | 100.000 ppb           |                   |
| 64Zn     | 100.000 ppb           |                   |
| 69Ga     | 100.000 ppb           |                   |
| 75As     | 100.000 ppb           |                   |
| 80Se     | 100.000 ppb           |                   |
| 85Rb     | 100.000 ppb           |                   |
| 88Sr     | 100.000 ppb           |                   |
| 107Ag    | 100.000 ppb           |                   |
| 114Cd    | 100.000 ppb           |                   |
| 133Cs    | 100.000 ppb           |                   |
| 138Ba    | 100.000 ppb           |                   |
| 139La    | 100.000 ppb           |                   |
| 140Ce    | 100.000 ppb           |                   |
| 141Pr    | 100.000 ppb           |                   |
| 142Nd    | 100.000 ppb           |                   |
| 152Sm    | 100.000 ppb           |                   |
| 153Eu    | 100.000 ppb           |                   |
| 158Gd    | 100.000 ppb           |                   |
| 164Dy    | 100.000 ppb           |                   |
| 165Ho    | 100.000 ppb           |                   |
| 166Er    | 100.000 ppb           |                   |
| 169Tm    | 100.000 ppb           |                   |
| 174Yb    | 100.000 ppb           |                   |
| 175Lu    | 100.000 ppb           |                   |
| 205Tl    | 100.000 ppb           |                   |
| 208Pb    | 100.000 ppb           |                   |
| 232Th    | 100.000 ppb           |                   |
| 238U     | 100.000 ppb           |                   |

| Category | Concentration average | Intensity average | Intensity RSD |
|----------|-----------------------|-------------------|---------------|
| 9Be      | 100.000 ppb           | 1,918,598 cps     |               |
| 11B      | 100.000 ppb           | 2,797,009 cps     |               |
| 24Mg     | 100.000 ppb           | 7,504,692 cps     |               |
| 27Al     | 100.000 ppb           | 9,728,902 cps     |               |
| 40Ca     | 100.000 ppb           | 6,367,332,708 cps |               |
| 51V      | 100.000 ppb           | 10,226,424 cps    |               |
| 52Cr     | 100.000 ppb           | 9,281,074 cps     |               |
| 55Mn     | 100.000 ppb           | 16,490,990 cps    |               |
| 56Fe     | 100.000 ppb           | 20,901,908 cps    |               |

| Category | Concentration average | Intensity average | Intensity RSD |
|----------|-----------------------|-------------------|---------------|
| 58Ni     | 100.000 ppb           | 5,321,998 cps     |               |
| 59Co     | 100.000 ppb           | 10,766,260 cps    |               |
| 63Cu     | 100.000 ppb           | 5,108,903 cps     |               |
| 64Zn     | 100.000 ppb           | 2,876,643 cps     |               |
| 69Ga     | 100.000 ppb           | 11,458,489 cps    |               |
| 75As     | 100.000 ppb           | 1,380,139 cps     |               |
| 80Se     | 100.000 ppb           | 10,714,109 cps    |               |
| 85Rb     | 100.000 ppb           | 13,874,790 cps    |               |
| 88Sr     | 100.000 ppb           | 19,482,869 cps    |               |
| 107Ag    | 100.000 ppb           | 9,179,082 cps     |               |
| 114Cd    | 100.000 ppb           | 5,092,981 cps     |               |
| 133Cs    | 100.000 ppb           | 22,972,711 cps    |               |
| 138Ba    | 100.000 ppb           | 20,102,264 cps    |               |
| 139La    | 100.000 ppb           | 25,175,434 cps    |               |
| 140Ce    | 100.000 ppb           | 25,715,982 cps    |               |
| 141Pr    | 100.000 ppb           | 34,524,403 cps    |               |
| 142Nd    | 100.000 ppb           | 12,997,014 cps    |               |
| 152Sm    | 100.000 ppb           | 10,333,720 cps    |               |
| 153Eu    | 100.000 ppb           | 19,660,288 cps    |               |
| 158Gd    | 100.000 ppb           | 8,830,162 cps     |               |
| 164Dy    | 100.000 ppb           | 11,793,922 cps    |               |
| 165Ho    | 100.000 ppb           | 39,676,754 cps    |               |
| 166Er    | 100.000 ppb           | 13,048,449 cps    |               |
| 169Tm    | 100.000 ppb           | 39,919,976 cps    |               |
| 174Yb    | 100.000 ppb           | 13,890,371 cps    |               |
| 175Lu    | 100.000 ppb           | 40,325,261 cps    |               |
| 205Tl    | 100.000 ppb           | 21,331,030 cps    |               |
| 208Pb    | 100.000 ppb           | 15,816,179 cps    |               |
| 232Th    | 100.000 ppb           | 30,990,567 cps    |               |
| 238U     | 100.000 ppb           | 33,354,499 cps    |               |

## Sample Summary

Instrument ID: iCAP Q

Analysis index: 4

Analysis name: 179212jian

Analysis started at: 8/25/2021 4:52:37 PM

User name: WINDOWS-UPCI4ER\Administrator

| Category | Concentration average | Concentration RSD |
|----------|-----------------------|-------------------|
| 9Be      | 0.076 ppb             |                   |
| 11B      | 5.494 ppb             |                   |
| 24Mg     | 1,019.759 ppb         |                   |
| 27Al     | 1,339.706 ppb         |                   |
| 40Ca     | 632.184 ppb           |                   |
| 51V      | 2.998 ppb             |                   |
| 52Cr     | 3.573 ppb             |                   |
| 55Mn     | 33.396 ppb            |                   |
| 56Fe     | 1,596.117 ppb         |                   |
| 58Ni     | 15.286 ppb            |                   |
| 59Co     | 0.660 ppb             |                   |
| 63Cu     | 15.936 ppb            |                   |
| 64Zn     | 187.853 ppb           |                   |
| 69Ga     | 0.839 ppb             |                   |
| 75As     | 1.328 ppb             |                   |
| 80Se     | -151.275 ppb          |                   |
| 85Rb     | 3.411 ppb             |                   |
| 88Sr     | 16.312 ppb            |                   |
| 107Ag    | 0.175 ppb             |                   |
| 114Cd    | 0.055 ppb             |                   |
| 133Cs    | 0.338 ppb             |                   |
| 138Ba    | 11.894 ppb            |                   |
| 139La    | 1.437 ppb             |                   |
| 140Ce    | 2.703 ppb             |                   |
| 141Pr    | 0.306 ppb             |                   |
| 142Nd    | 1.573 ppb             |                   |
| 152Sm    | 0.230 ppb             |                   |
| 153Eu    | 0.047 ppb             |                   |
| 158Gd    | 0.247 ppb             |                   |
| 164Dy    | 0.153 ppb             |                   |
| 165Ho    | 0.028 ppb             |                   |
| 166Er    | 0.106 ppb             |                   |
| 169Tm    | 0.010 ppb             |                   |
| 174Yb    | 0.066 ppb             |                   |
| 175Lu    | 0.010 ppb             |                   |
| 205Tl    | 0.025 ppb             |                   |
| 208Pb    | 2.017 ppb             |                   |
| 232Th    | 0.611 ppb             |                   |
| 238U     | 0.113 ppb             |                   |

| Category | Concentration average | Intensity average | Intensity RSD |
|----------|-----------------------|-------------------|---------------|
| 9Be      | 0.076 ppb             | 1,470 cps         |               |
| 11B      | 5.494 ppb             | 206,735 cps       |               |
| 24Mg     | 1,019.759 ppb         | 75,036,833 cps    |               |
| 27Al     | 1,339.706 ppb         | 128,229,281 cps   |               |
| 40Ca     | 632.184 ppb           | 5,472,914,857 cps |               |
| 51V      | 2.998 ppb             | 323,372 cps       |               |
| 52Cr     | 3.573 ppb             | 389,266 cps       |               |
| 55Mn     | 33.396 ppb            | 5,567,956 cps     |               |
| 56Fe     | 1,596.117 ppb         | 211,865,153 cps   |               |

| Category | Concentration average | Intensity average | Intensity RSD |
|----------|-----------------------|-------------------|---------------|
| 58Ni     | 15.286 ppb            | 836,293 cps       |               |
| 59Co     | 0.660 ppb             | 75,944 cps        |               |
| 63Cu     | 15.936 ppb            | 822,845 cps       |               |
| 64Zn     | 187.853 ppb           | 5,371,584 cps     |               |
| 69Ga     | 0.839 ppb             | 117,258 cps       |               |
| 75As     | 1.328 ppb             | 19,913 cps        |               |
| 80Se     | -151.275 ppb          | 9,439,619 cps     |               |
| 85Rb     | 3.411 ppb             | 478,502 cps       |               |
| 88Sr     | 16.312 ppb            | 3,204,110 cps     |               |
| 107Ag    | 0.175 ppb             | 18,687 cps        |               |
| 114Cd    | 0.055 ppb             | 4,111 cps         |               |
| 133Cs    | 0.338 ppb             | 77,899 cps        |               |
| 138Ba    | 11.894 ppb            | 2,541,366 cps     |               |
| 139La    | 1.437 ppb             | 362,006 cps       |               |
| 140Ce    | 2.703 ppb             | 695,797 cps       |               |
| 141Pr    | 0.306 ppb             | 105,887 cps       |               |
| 142Nd    | 1.573 ppb             | 204,618 cps       |               |
| 152Sm    | 0.230 ppb             | 23,779 cps        |               |
| 153Eu    | 0.047 ppb             | 9,367 cps         |               |
| 158Gd    | 0.247 ppb             | 21,869 cps        |               |
| 164Dy    | 0.153 ppb             | 18,223 cps        |               |
| 165Ho    | 0.028 ppb             | 11,102 cps        |               |
| 166Er    | 0.106 ppb             | 16,424 cps        |               |
| 169Tm    | 0.010 ppb             | 4,117 cps         |               |
| 174Yb    | 0.066 ppb             | 9,127 cps         |               |
| 175Lu    | 0.010 ppb             | 4,004 cps         |               |
| 205Tl    | 0.025 ppb             | 5,388 cps         |               |
| 208Pb    | 2.017 ppb             | 326,665 cps       |               |
| 232Th    | 0.611 ppb             | 191,100 cps       |               |
| 238U     | 0.113 ppb             | 38,059 cps        |               |

## Sample Summary

Instrument ID: iCAP Q

Analysis index: 5

Analysis name: 04675jian

Analysis started at: 8/25/2021 4:54:35 PM

User name: WINDOWS-UPCI4ER\Administrator

| Category | Concentration average | Concentration RSD |
|----------|-----------------------|-------------------|
| 9Be      | 0.052 ppb             |                   |
| 11B      | 3.148 ppb             |                   |
| 24Mg     | 1,000.751 ppb         |                   |
| 27Al     | 1,486.776 ppb         |                   |
| 40Ca     | 530.464 ppb           |                   |
| 51V      | 2.927 ppb             |                   |
| 52Cr     | 3.546 ppb             |                   |
| 55Mn     | 33.901 ppb            |                   |
| 56Fe     | 1,617.834 ppb         |                   |
| 58Ni     | 14.983 ppb            |                   |
| 59Co     | 0.650 ppb             |                   |
| 63Cu     | 10.532 ppb            |                   |
| 64Zn     | 169.477 ppb           |                   |
| 69Ga     | 0.831 ppb             |                   |
| 75As     | 0.774 ppb             |                   |
| 80Se     | -192.250 ppb          |                   |
| 85Rb     | 3.391 ppb             |                   |
| 88Sr     | 17.998 ppb            |                   |
| 107Ag    | 0.038 ppb             |                   |
| 114Cd    | 0.035 ppb             |                   |
| 133Cs    | 0.300 ppb             |                   |
| 138Ba    | 11.633 ppb            |                   |
| 139La    | 1.407 ppb             |                   |
| 140Ce    | 2.630 ppb             |                   |
| 141Pr    | 0.304 ppb             |                   |
| 142Nd    | 1.488 ppb             |                   |
| 152Sm    | 0.237 ppb             |                   |
| 153Eu    | 0.044 ppb             |                   |
| 158Gd    | 0.232 ppb             |                   |
| 164Dy    | 0.147 ppb             |                   |
| 165Ho    | 0.028 ppb             |                   |
| 166Er    | 0.074 ppb             |                   |
| 169Tm    | 0.010 ppb             |                   |
| 174Yb    | 0.063 ppb             |                   |
| 175Lu    | 0.009 ppb             |                   |
| 205Tl    | 0.022 ppb             |                   |
| 208Pb    | 1.591 ppb             |                   |
| 232Th    | 0.506 ppb             |                   |
| 238U     | 0.116 ppb             |                   |

| Category | Concentration average | Intensity average | Intensity RSD |
|----------|-----------------------|-------------------|---------------|
| 9Be      | 0.052 ppb             | 1,013 cps         |               |
| 11B      | 3.148 ppb             | 142,437 cps       |               |
| 24Mg     | 1,000.751 ppb         | 73,641,204 cps    |               |
| 27Al     | 1,486.776 ppb         | 142,287,297 cps   |               |
| 40Ca     | 530.464 ppb           | 5,643,870,552 cps |               |
| 51V      | 2.927 ppb             | 316,157 cps       |               |
| 52Cr     | 3.546 ppb             | 386,783 cps       |               |
| 55Mn     | 33.901 ppb            | 5,650,810 cps     |               |
| 56Fe     | 1,617.834 ppb         | 214,637,098 cps   |               |

| Category | Concentration average | Intensity average | Intensity RSD |
|----------|-----------------------|-------------------|---------------|
| 58Ni     | 14.983 ppb            | 820,267 cps       |               |
| 59Co     | 0.650 ppb             | 74,928 cps        |               |
| 63Cu     | 10.532 ppb            | 547,293 cps       |               |
| 64Zn     | 169.477 ppb           | 4,849,724 cps     |               |
| 69Ga     | 0.831 ppb             | 116,286 cps       |               |
| 75As     | 0.774 ppb             | 12,283 cps        |               |
| 80Se     | -192.250 ppb          | 9,231,789 cps     |               |
| 85Rb     | 3.391 ppb             | 475,758 cps       |               |
| 88Sr     | 17.998 ppb            | 3,532,116 cps     |               |
| 107Ag    | 0.038 ppb             | 6,105 cps         |               |
| 114Cd    | 0.035 ppb             | 3,064 cps         |               |
| 133Cs    | 0.300 ppb             | 69,239 cps        |               |
| 138Ba    | 11.633 ppb            | 2,489,270 cps     |               |
| 139La    | 1.407 ppb             | 354,644 cps       |               |
| 140Ce    | 2.630 ppb             | 677,160 cps       |               |
| 141Pr    | 0.304 ppb             | 104,960 cps       |               |
| 142Nd    | 1.488 ppb             | 193,535 cps       |               |
| 152Sm    | 0.237 ppb             | 24,591 cps        |               |
| 153Eu    | 0.044 ppb             | 8,806 cps         |               |
| 158Gd    | 0.232 ppb             | 20,517 cps        |               |
| 164Dy    | 0.147 ppb             | 17,499 cps        |               |
| 165Ho    | 0.028 ppb             | 11,105 cps        |               |
| 166Er    | 0.074 ppb             | 12,326 cps        |               |
| 169Tm    | 0.010 ppb             | 3,957 cps         |               |
| 174Yb    | 0.063 ppb             | 8,833 cps         |               |
| 175Lu    | 0.009 ppb             | 3,651 cps         |               |
| 205Tl    | 0.022 ppb             | 4,678 cps         |               |
| 208Pb    | 1.591 ppb             | 259,332 cps       |               |
| 232Th    | 0.506 ppb             | 158,568 cps       |               |
| 238U     | 0.116 ppb             | 38,762 cps        |               |

## Sample Summary

Instrument ID: iCAP Q

Analysis index: 6

Analysis name: 045713jian

Analysis started at: 8/25/2021 4:56:25 PM

User name: WINDOWS-UPCI4ER\Administrator

| Category | Concentration average | Concentration RSD |
|----------|-----------------------|-------------------|
| 9Be      | 0.092 ppb             |                   |
| 11B      | 11.009 ppb            |                   |
| 24Mg     | 1,870.789 ppb         |                   |
| 27Al     | 2,353.734 ppb         |                   |
| 40Ca     | 60.968 ppb            |                   |
| 51V      | 5.196 ppb             |                   |
| 52Cr     | 6.723 ppb             |                   |
| 55Mn     | 61.454 ppb            |                   |
| 56Fe     | 2,906.912 ppb         |                   |
| 58Ni     | 27.798 ppb            |                   |
| 59Co     | 1.205 ppb             |                   |
| 63Cu     | 24.681 ppb            |                   |
| 64Zn     | 180.969 ppb           |                   |
| 69Ga     | 1.515 ppb             |                   |
| 75As     | 1.350 ppb             |                   |
| 80Se     | -167.064 ppb          |                   |
| 85Rb     | 5.228 ppb             |                   |
| 88Sr     | 27.623 ppb            |                   |
| 107Ag    | 0.660 ppb             |                   |
| 114Cd    | 0.102 ppb             |                   |
| 133Cs    | 0.482 ppb             |                   |
| 138Ba    | 21.096 ppb            |                   |
| 139La    | 2.488 ppb             |                   |
| 140Ce    | 4.507 ppb             |                   |
| 141Pr    | 0.531 ppb             |                   |
| 142Nd    | 2.553 ppb             |                   |
| 152Sm    | 0.390 ppb             |                   |
| 153Eu    | 0.079 ppb             |                   |
| 158Gd    | 0.388 ppb             |                   |
| 164Dy    | 0.267 ppb             |                   |
| 165Ho    | 0.047 ppb             |                   |
| 166Er    | 0.203 ppb             |                   |
| 169Tm    | 0.017 ppb             |                   |
| 174Yb    | 0.099 ppb             |                   |
| 175Lu    | 0.015 ppb             |                   |
| 205Tl    | 0.031 ppb             |                   |
| 208Pb    | 2.291 ppb             |                   |
| 232Th    | 0.966 ppb             |                   |
| 238U     | 0.162 ppb             |                   |

| Category | Concentration average | Intensity average | Intensity RSD |
|----------|-----------------------|-------------------|---------------|
| 9Be      | 0.092 ppb             | 1,777 cps         |               |
| 11B      | 11.009 ppb            | 357,915 cps       |               |
| 24Mg     | 1,870.789 ppb         | 137,522,660 cps   |               |
| 27Al     | 2,353.734 ppb         | 225,157,628 cps   |               |
| 40Ca     | 60.968 ppb            | 6,432,931,531 cps |               |
| 51V      | 5.196 ppb             | 547,732 cps       |               |
| 52Cr     | 6.723 ppb             | 679,768 cps       |               |
| 55Mn     | 61.454 ppb            | 10,169,429 cps    |               |
| 56Fe     | 2,906.912 ppb         | 379,174,080 cps   |               |

| Category | Concentration average | Intensity average | Intensity RSD |
|----------|-----------------------|-------------------|---------------|
| 58Ni     | 27.798 ppb            | 1,498,858 cps     |               |
| 59Co     | 1.205 ppb             | 134,596 cps       |               |
| 63Cu     | 24.681 ppb            | 1,268,701 cps     |               |
| 64Zn     | 180.969 ppb           | 5,176,087 cps     |               |
| 69Ga     | 1.515 ppb             | 194,570 cps       |               |
| 75As     | 1.350 ppb             | 20,220 cps        |               |
| 80Se     | -167.064 ppb          | 9,359,535 cps     |               |
| 85Rb     | 5.228 ppb             | 730,465 cps       |               |
| 88Sr     | 27.623 ppb            | 5,404,301 cps     |               |
| 107Ag    | 0.660 ppb             | 63,177 cps        |               |
| 114Cd    | 0.102 ppb             | 6,488 cps         |               |
| 133Cs    | 0.482 ppb             | 111,130 cps       |               |
| 138Ba    | 21.096 ppb            | 4,375,411 cps     |               |
| 139La    | 2.488 ppb             | 626,664 cps       |               |
| 140Ce    | 4.507 ppb             | 1,159,724 cps     |               |
| 141Pr    | 0.531 ppb             | 183,320 cps       |               |
| 142Nd    | 2.553 ppb             | 332,071 cps       |               |
| 152Sm    | 0.390 ppb             | 40,382 cps        |               |
| 153Eu    | 0.079 ppb             | 15,633 cps        |               |
| 158Gd    | 0.388 ppb             | 34,297 cps        |               |
| 164Dy    | 0.267 ppb             | 31,640 cps        |               |
| 165Ho    | 0.047 ppb             | 18,711 cps        |               |
| 166Er    | 0.203 ppb             | 29,117 cps        |               |
| 169Tm    | 0.017 ppb             | 6,839 cps         |               |
| 174Yb    | 0.099 ppb             | 13,794 cps        |               |
| 175Lu    | 0.015 ppb             | 5,971 cps         |               |
| 205Tl    | 0.031 ppb             | 6,532 cps         |               |
| 208Pb    | 2.291 ppb             | 370,077 cps       |               |
| 232Th    | 0.966 ppb             | 300,847 cps       |               |
| 238U     | 0.162 ppb             | 54,195 cps        |               |

## Sample Summary

Instrument ID: iCAP Q

Analysis index: 7

Analysis name: 046754jian

Analysis started at: 8/25/2021 4:58:22 PM

User name: WINDOWS-UPCI4ER\Administrator

| Category | Concentration average | Concentration RSD |
|----------|-----------------------|-------------------|
| 9Be      | 0.039 ppb             |                   |
| 11B      | 3.707 ppb             |                   |
| 24Mg     | 782.383 ppb           |                   |
| 27Al     | 1,115.991 ppb         |                   |
| 40Ca     | -82.466 ppb           |                   |
| 51V      | 2.423 ppb             |                   |
| 52Cr     | 3.343 ppb             |                   |
| 55Mn     | 24.636 ppb            |                   |
| 56Fe     | 1,130.123 ppb         |                   |
| 58Ni     | 12.542 ppb            |                   |
| 59Co     | 0.474 ppb             |                   |
| 63Cu     | 17.005 ppb            |                   |
| 64Zn     | 179.833 ppb           |                   |
| 69Ga     | 0.734 ppb             |                   |
| 75As     | 0.773 ppb             |                   |
| 80Se     | -71.613 ppb           |                   |
| 85Rb     | 2.537 ppb             |                   |
| 88Sr     | 14.624 ppb            |                   |
| 107Ag    | 0.053 ppb             |                   |
| 114Cd    | 0.091 ppb             |                   |
| 133Cs    | 0.192 ppb             |                   |
| 138Ba    | 8.961 ppb             |                   |
| 139La    | 0.941 ppb             |                   |
| 140Ce    | 1.712 ppb             |                   |
| 141Pr    | 0.221 ppb             |                   |
| 142Nd    | 1.167 ppb             |                   |
| 152Sm    | 0.159 ppb             |                   |
| 153Eu    | 0.032 ppb             |                   |
| 158Gd    | 0.161 ppb             |                   |
| 164Dy    | 0.099 ppb             |                   |
| 165Ho    | 0.018 ppb             |                   |
| 166Er    | 0.046 ppb             |                   |
| 169Tm    | 0.006 ppb             |                   |
| 174Yb    | 0.043 ppb             |                   |
| 175Lu    | 0.006 ppb             |                   |
| 205Tl    | 0.016 ppb             |                   |
| 208Pb    | 1.712 ppb             |                   |
| 232Th    | 0.280 ppb             |                   |
| 238U     | 0.081 ppb             |                   |

| Category | Concentration average | Intensity average | Intensity RSD |
|----------|-----------------------|-------------------|---------------|
| 9Be      | 0.039 ppb             | 763 cps           |               |
| 11B      | 3.707 ppb             | 157,762 cps       |               |
| 24Mg     | 782.383 ppb           | 57,607,788 cps    |               |
| 27Al     | 1,115.991 ppb         | 106,844,894 cps   |               |
| 40Ca     | -82.466 ppb           | 6,673,995,734 cps |               |
| 51V      | 2.423 ppb             | 264,701 cps       |               |
| 52Cr     | 3.343 ppb             | 368,029 cps       |               |
| 55Mn     | 24.636 ppb            | 4,131,368 cps     |               |
| 56Fe     | 1,130.123 ppb         | 152,386,019 cps   |               |

| Category | Concentration average | Intensity average | Intensity RSD |
|----------|-----------------------|-------------------|---------------|
| 58Ni     | 12.542 ppb            | 691,015 cps       |               |
| 59Co     | 0.474 ppb             | 55,992 cps        |               |
| 63Cu     | 17.005 ppb            | 877,335 cps       |               |
| 64Zn     | 179.833 ppb           | 5,143,844 cps     |               |
| 69Ga     | 0.734 ppb             | 105,249 cps       |               |
| 75As     | 0.773 ppb             | 12,273 cps        |               |
| 80Se     | -71.613 ppb           | 9,843,669 cps     |               |
| 85Rb     | 2.537 ppb             | 357,265 cps       |               |
| 88Sr     | 14.624 ppb            | 2,875,923 cps     |               |
| 107Ag    | 0.053 ppb             | 7,489 cps         |               |
| 114Cd    | 0.091 ppb             | 5,918 cps         |               |
| 133Cs    | 0.192 ppb             | 44,446 cps        |               |
| 138Ba    | 8.961 ppb             | 1,956,753 cps     |               |
| 139La    | 0.941 ppb             | 237,295 cps       |               |
| 140Ce    | 1.712 ppb             | 440,914 cps       |               |
| 141Pr    | 0.221 ppb             | 76,310 cps        |               |
| 142Nd    | 1.167 ppb             | 151,892 cps       |               |
| 152Sm    | 0.159 ppb             | 16,488 cps        |               |
| 153Eu    | 0.032 ppb             | 6,445 cps         |               |
| 158Gd    | 0.161 ppb             | 14,222 cps        |               |
| 164Dy    | 0.099 ppb             | 11,822 cps        |               |
| 165Ho    | 0.018 ppb             | 7,199 cps         |               |
| 166Er    | 0.046 ppb             | 8,560 cps         |               |
| 169Tm    | 0.006 ppb             | 2,650 cps         |               |
| 174Yb    | 0.043 ppb             | 5,988 cps         |               |
| 175Lu    | 0.006 ppb             | 2,364 cps         |               |
| 205Tl    | 0.016 ppb             | 3,450 cps         |               |
| 208Pb    | 1.712 ppb             | 278,503 cps       |               |
| 232Th    | 0.280 ppb             | 88,493 cps        |               |
| 238U     | 0.081 ppb             | 27,177 cps        |               |

## Sample Summary

Instrument ID: iCAP Q

Analysis index: 8

Analysis name: 046747jian

Analysis started at: 8/25/2021 5:00:22 PM

User name: WINDOWS-UPCI4ER\Administrator

| Category | Concentration average | Concentration RSD |
|----------|-----------------------|-------------------|
| 9Be      | 0.068 ppb             |                   |
| 11B      | 4.429 ppb             |                   |
| 24Mg     | 1,569.122 ppb         |                   |
| 27Al     | 2,129.887 ppb         |                   |
| 40Ca     | -389.175 ppb          |                   |
| 51V      | 4.525 ppb             |                   |
| 52Cr     | 5.213 ppb             |                   |
| 55Mn     | 53.986 ppb            |                   |
| 56Fe     | 2,299.857 ppb         |                   |
| 58Ni     | 21.892 ppb            |                   |
| 59Co     | 1.076 ppb             |                   |
| 63Cu     | 15.228 ppb            |                   |
| 64Zn     | 168.092 ppb           |                   |
| 69Ga     | 1.249 ppb             |                   |
| 75As     | 1.145 ppb             |                   |
| 80Se     | -70.311 ppb           |                   |
| 85Rb     | 4.178 ppb             |                   |
| 88Sr     | 24.936 ppb            |                   |
| 107Ag    | 0.025 ppb             |                   |
| 114Cd    | 0.086 ppb             |                   |
| 133Cs    | 0.397 ppb             |                   |
| 138Ba    | 14.510 ppb            |                   |
| 139La    | 1.629 ppb             |                   |
| 140Ce    | 3.166 ppb             |                   |
| 141Pr    | 0.380 ppb             |                   |
| 142Nd    | 2.210 ppb             |                   |
| 152Sm    | 0.290 ppb             |                   |
| 153Eu    | 0.059 ppb             |                   |
| 158Gd    | 0.289 ppb             |                   |
| 164Dy    | 0.178 ppb             |                   |
| 165Ho    | 0.033 ppb             |                   |
| 166Er    | 0.073 ppb             |                   |
| 169Tm    | 0.011 ppb             |                   |
| 174Yb    | 0.065 ppb             |                   |
| 175Lu    | 0.011 ppb             |                   |
| 205Tl    | 0.025 ppb             |                   |
| 208Pb    | 2.064 ppb             |                   |
| 232Th    | 0.528 ppb             |                   |
| 238U     | 0.120 ppb             |                   |

| Category | Concentration average | Intensity average | Intensity RSD |
|----------|-----------------------|-------------------|---------------|
| 9Be      | 0.068 ppb             | 1,313 cps         |               |
| 11B      | 4.429 ppb             | 177,543 cps       |               |
| 24Mg     | 1,569.122 ppb         | 115,373,119 cps   |               |
| 27Al     | 2,129.887 ppb         | 203,760,658 cps   |               |
| 40Ca     | -389.175 ppb          | 7,189,467,793 cps |               |
| 51V      | 4.525 ppb             | 479,276 cps       |               |
| 52Cr     | 5.213 ppb             | 540,506 cps       |               |
| 55Mn     | 53.986 ppb            | 8,944,818 cps     |               |
| 56Fe     | 2,299.857 ppb         | 301,690,021 cps   |               |

| Category | Concentration average | Intensity average | Intensity RSD |
|----------|-----------------------|-------------------|---------------|
| 58Ni     | 21.892 ppb            | 1,186,127 cps     |               |
| 59Co     | 1.076 ppb             | 120,741 cps       |               |
| 63Cu     | 15.228 ppb            | 786,753 cps       |               |
| 64Zn     | 168.092 ppb           | 4,810,392 cps     |               |
| 69Ga     | 1.249 ppb             | 164,149 cps       |               |
| 75As     | 1.145 ppb             | 17,389 cps        |               |
| 80Se     | -70.311 ppb           | 9,850,276 cps     |               |
| 85Rb     | 4.178 ppb             | 584,890 cps       |               |
| 88Sr     | 24.936 ppb            | 4,881,750 cps     |               |
| 107Ag    | 0.025 ppb             | 4,924 cps         |               |
| 114Cd    | 0.086 ppb             | 5,661 cps         |               |
| 133Cs    | 0.397 ppb             | 91,639 cps        |               |
| 138Ba    | 14.510 ppb            | 3,062,832 cps     |               |
| 139La    | 1.629 ppb             | 410,537 cps       |               |
| 140Ce    | 3.166 ppb             | 814,838 cps       |               |
| 141Pr    | 0.380 ppb             | 131,336 cps       |               |
| 142Nd    | 2.210 ppb             | 287,474 cps       |               |
| 152Sm    | 0.290 ppb             | 30,036 cps        |               |
| 153Eu    | 0.059 ppb             | 11,629 cps        |               |
| 158Gd    | 0.289 ppb             | 25,520 cps        |               |
| 164Dy    | 0.178 ppb             | 21,138 cps        |               |
| 165Ho    | 0.033 ppb             | 13,080 cps        |               |
| 166Er    | 0.073 ppb             | 12,196 cps        |               |
| 169Tm    | 0.011 ppb             | 4,561 cps         |               |
| 174Yb    | 0.065 ppb             | 9,023 cps         |               |
| 175Lu    | 0.011 ppb             | 4,354 cps         |               |
| 205Tl    | 0.025 ppb             | 5,411 cps         |               |
| 208Pb    | 2.064 ppb             | 334,181 cps       |               |
| 232Th    | 0.528 ppb             | 165,240 cps       |               |
| 238U     | 0.120 ppb             | 40,152 cps        |               |

## Sample Summary

Instrument ID: iCAP Q

Analysis index: 9

Analysis name: 051946jian

Analysis started at: 8/25/2021 5:02:10 PM

User name: WINDOWS-UPCI4ER\Administrator

| Category | Concentration average | Concentration RSD |
|----------|-----------------------|-------------------|
| 9Be      | 0.072 ppb             |                   |
| 11B      | 6.494 ppb             |                   |
| 24Mg     | 1,705.440 ppb         |                   |
| 27Al     | 2,383.123 ppb         |                   |
| 40Ca     | -421.311 ppb          |                   |
| 51V      | 4.761 ppb             |                   |
| 52Cr     | 5.137 ppb             |                   |
| 55Mn     | 52.431 ppb            |                   |
| 56Fe     | 2,525.514 ppb         |                   |
| 58Ni     | 24.003 ppb            |                   |
| 59Co     | 1.080 ppb             |                   |
| 63Cu     | 11.373 ppb            |                   |
| 64Zn     | 162.393 ppb           |                   |
| 69Ga     | 1.375 ppb             |                   |
| 75As     | 1.264 ppb             |                   |
| 80Se     | -35.616 ppb           |                   |
| 85Rb     | 5.348 ppb             |                   |
| 88Sr     | 21.927 ppb            |                   |
| 107Ag    | 0.028 ppb             |                   |
| 114Cd    | 0.056 ppb             |                   |
| 133Cs    | 0.404 ppb             |                   |
| 138Ba    | 14.545 ppb            |                   |
| 139La    | 2.060 ppb             |                   |
| 140Ce    | 4.066 ppb             |                   |
| 141Pr    | 0.462 ppb             |                   |
| 142Nd    | 2.239 ppb             |                   |
| 152Sm    | 0.347 ppb             |                   |
| 153Eu    | 0.074 ppb             |                   |
| 158Gd    | 0.339 ppb             |                   |
| 164Dy    | 0.200 ppb             |                   |
| 165Ho    | 0.039 ppb             |                   |
| 166Er    | 0.095 ppb             |                   |
| 169Tm    | 0.014 ppb             |                   |
| 174Yb    | 0.086 ppb             |                   |
| 175Lu    | 0.013 ppb             |                   |
| 205Tl    | 0.030 ppb             |                   |
| 208Pb    | 1.808 ppb             |                   |
| 232Th    | 0.625 ppb             |                   |
| 238U     | 0.119 ppb             |                   |

| Category | Concentration average | Intensity average | Intensity RSD |
|----------|-----------------------|-------------------|---------------|
| 9Be      | 0.072 ppb             | 1,390 cps         |               |
| 11B      | 6.494 ppb             | 234,142 cps       |               |
| 24Mg     | 1,705.440 ppb         | 125,382,144 cps   |               |
| 27Al     | 2,383.123 ppb         | 227,966,824 cps   |               |
| 40Ca     | -421.311 ppb          | 7,243,476,565 cps |               |
| 51V      | 4.761 ppb             | 503,387 cps       |               |
| 52Cr     | 5.137 ppb             | 533,519 cps       |               |
| 55Mn     | 52.431 ppb            | 8,689,741 cps     |               |
| 56Fe     | 2,525.514 ppb         | 330,492,686 cps   |               |

| Category | Concentration average | Intensity average | Intensity RSD |
|----------|-----------------------|-------------------|---------------|
| 58Ni     | 24.003 ppb            | 1,297,890 cps     |               |
| 59Co     | 1.080 ppb             | 121,152 cps       |               |
| 63Cu     | 11.373 ppb            | 590,196 cps       |               |
| 64Zn     | 162.393 ppb           | 4,648,546 cps     |               |
| 69Ga     | 1.375 ppb             | 178,480 cps       |               |
| 75As     | 1.264 ppb             | 19,028 cps        |               |
| 80Se     | -35.616 ppb           | 10,026,251 cps    |               |
| 85Rb     | 5.348 ppb             | 747,070 cps       |               |
| 88Sr     | 21.927 ppb            | 4,296,467 cps     |               |
| 107Ag    | 0.028 ppb             | 5,194 cps         |               |
| 114Cd    | 0.056 ppb             | 4,147 cps         |               |
| 133Cs    | 0.404 ppb             | 93,154 cps        |               |
| 138Ba    | 14.545 ppb            | 3,069,663 cps     |               |
| 139La    | 2.060 ppb             | 518,992 cps       |               |
| 140Ce    | 4.066 ppb             | 1,046,368 cps     |               |
| 141Pr    | 0.462 ppb             | 159,631 cps       |               |
| 142Nd    | 2.239 ppb             | 291,152 cps       |               |
| 152Sm    | 0.347 ppb             | 35,908 cps        |               |
| 153Eu    | 0.074 ppb             | 14,518 cps        |               |
| 158Gd    | 0.339 ppb             | 29,919 cps        |               |
| 164Dy    | 0.200 ppb             | 23,736 cps        |               |
| 165Ho    | 0.039 ppb             | 15,403 cps        |               |
| 166Er    | 0.095 ppb             | 14,976 cps        |               |
| 169Tm    | 0.014 ppb             | 5,678 cps         |               |
| 174Yb    | 0.086 ppb             | 11,919 cps        |               |
| 175Lu    | 0.013 ppb             | 5,084 cps         |               |
| 205Tl    | 0.030 ppb             | 6,438 cps         |               |
| 208Pb    | 1.808 ppb             | 293,613 cps       |               |
| 232Th    | 0.625 ppb             | 195,434 cps       |               |
| 238U     | 0.119 ppb             | 39,790 cps        |               |

## Sample Summary

Instrument ID: iCAP Q

Analysis index: 10

Analysis name: 046317jian

Analysis started at: 8/25/2021 5:04:06 PM

User name: WINDOWS-UPCI4ER\Administrator

| Category | Concentration average | Concentration RSD |
|----------|-----------------------|-------------------|
| 9Be      | 0.066 ppb             |                   |
| 11B      | 4.686 ppb             |                   |
| 24Mg     | 1,706.521 ppb         |                   |
| 27Al     | 2,159.375 ppb         |                   |
| 40Ca     | -539.250 ppb          |                   |
| 51V      | 4.833 ppb             |                   |
| 52Cr     | 5.547 ppb             |                   |
| 55Mn     | 50.895 ppb            |                   |
| 56Fe     | 2,419.744 ppb         |                   |
| 58Ni     | 23.829 ppb            |                   |
| 59Co     | 1.059 ppb             |                   |
| 63Cu     | 15.918 ppb            |                   |
| 64Zn     | 192.353 ppb           |                   |
| 69Ga     | 1.414 ppb             |                   |
| 75As     | 1.380 ppb             |                   |
| 80Se     | 11.407 ppb            |                   |
| 85Rb     | 4.858 ppb             |                   |
| 88Sr     | 21.765 ppb            |                   |
| 107Ag    | 0.099 ppb             |                   |
| 114Cd    | 0.091 ppb             |                   |
| 133Cs    | 0.372 ppb             |                   |
| 138Ba    | 15.041 ppb            |                   |
| 139La    | 1.835 ppb             |                   |
| 140Ce    | 3.376 ppb             |                   |
| 141Pr    | 0.398 ppb             |                   |
| 142Nd    | 1.975 ppb             |                   |
| 152Sm    | 0.302 ppb             |                   |
| 153Eu    | 0.060 ppb             |                   |
| 158Gd    | 0.286 ppb             |                   |
| 164Dy    | 0.196 ppb             |                   |
| 165Ho    | 0.035 ppb             |                   |
| 166Er    | 0.088 ppb             |                   |
| 169Tm    | 0.014 ppb             |                   |
| 174Yb    | 0.070 ppb             |                   |
| 175Lu    | 0.010 ppb             |                   |
| 205Tl    | 0.026 ppb             |                   |
| 208Pb    | 1.861 ppb             |                   |
| 232Th    | 0.556 ppb             |                   |
| 238U     | 0.107 ppb             |                   |

| Category | Concentration average | Intensity average | Intensity RSD |
|----------|-----------------------|-------------------|---------------|
| 9Be      | 0.066 ppb             | 1,280 cps         |               |
| 11B      | 4.686 ppb             | 184,586 cps       |               |
| 24Mg     | 1,706.521 ppb         | 125,461,527 cps   |               |
| 27Al     | 2,159.375 ppb         | 206,579,380 cps   |               |
| 40Ca     | -539.250 ppb          | 7,441,692,142 cps |               |
| 51V      | 4.833 ppb             | 510,728 cps       |               |
| 52Cr     | 5.547 ppb             | 571,311 cps       |               |
| 55Mn     | 50.895 ppb            | 8,437,787 cps     |               |
| 56Fe     | 2,419.744 ppb         | 316,992,320 cps   |               |

| Category | Concentration average | Intensity average | Intensity RSD |
|----------|-----------------------|-------------------|---------------|
| 58Ni     | 23.829 ppb            | 1,288,697 cps     |               |
| 59Co     | 1.059 ppb             | 118,969 cps       |               |
| 63Cu     | 15.918 ppb            | 821,901 cps       |               |
| 64Zn     | 192.353 ppb           | 5,499,390 cps     |               |
| 69Ga     | 1.414 ppb             | 182,988 cps       |               |
| 75As     | 1.380 ppb             | 20,627 cps        |               |
| 80Se     | 11.407 ppb            | 10,264,755 cps    |               |
| 85Rb     | 4.858 ppb             | 679,152 cps       |               |
| 88Sr     | 21.765 ppb            | 4,264,918 cps     |               |
| 107Ag    | 0.099 ppb             | 11,736 cps        |               |
| 114Cd    | 0.091 ppb             | 5,935 cps         |               |
| 133Cs    | 0.372 ppb             | 85,711 cps        |               |
| 138Ba    | 15.041 ppb            | 3,168,704 cps     |               |
| 139La    | 1.835 ppb             | 462,302 cps       |               |
| 140Ce    | 3.376 ppb             | 868,804 cps       |               |
| 141Pr    | 0.398 ppb             | 137,582 cps       |               |
| 142Nd    | 1.975 ppb             | 256,869 cps       |               |
| 152Sm    | 0.302 ppb             | 31,283 cps        |               |
| 153Eu    | 0.060 ppb             | 11,892 cps        |               |
| 158Gd    | 0.286 ppb             | 25,272 cps        |               |
| 164Dy    | 0.196 ppb             | 23,238 cps        |               |
| 165Ho    | 0.035 ppb             | 13,758 cps        |               |
| 166Er    | 0.088 ppb             | 14,131 cps        |               |
| 169Tm    | 0.014 ppb             | 5,505 cps         |               |
| 174Yb    | 0.070 ppb             | 9,720 cps         |               |
| 175Lu    | 0.010 ppb             | 4,004 cps         |               |
| 205Tl    | 0.026 ppb             | 5,451 cps         |               |
| 208Pb    | 1.861 ppb             | 301,997 cps       |               |
| 232Th    | 0.556 ppb             | 173,929 cps       |               |
| 238U     | 0.107 ppb             | 35,925 cps        |               |

## Sample Summary

Instrument ID: iCAP Q

Analysis index: 11

Analysis name: 033892jian

Analysis started at: 8/25/2021 5:06:01 PM

User name: WINDOWS-UPCI4ER\Administrator

| Category | Concentration average | Concentration RSD |
|----------|-----------------------|-------------------|
| 9Be      | 0.049 ppb             |                   |
| 11B      | 3.803 ppb             |                   |
| 24Mg     | 981.352 ppb           |                   |
| 27Al     | 1,332.301 ppb         |                   |
| 40Ca     | -559.657 ppb          |                   |
| 51V      | 3.004 ppb             |                   |
| 52Cr     | 5.335 ppb             |                   |
| 55Mn     | 30.860 ppb            |                   |
| 56Fe     | 1,418.375 ppb         |                   |
| 58Ni     | 13.906 ppb            |                   |
| 59Co     | 0.622 ppb             |                   |
| 63Cu     | 12.269 ppb            |                   |
| 64Zn     | 190.156 ppb           |                   |
| 69Ga     | 0.888 ppb             |                   |
| 75As     | 1.186 ppb             |                   |
| 80Se     | 45.618 ppb            |                   |
| 85Rb     | 3.708 ppb             |                   |
| 88Sr     | 13.925 ppb            |                   |
| 107Ag    | 0.081 ppb             |                   |
| 114Cd    | 0.057 ppb             |                   |
| 133Cs    | 0.264 ppb             |                   |
| 138Ba    | 9.107 ppb             |                   |
| 139La    | 0.924 ppb             |                   |
| 140Ce    | 1.853 ppb             |                   |
| 141Pr    | 0.220 ppb             |                   |
| 142Nd    | 1.083 ppb             |                   |
| 152Sm    | 0.160 ppb             |                   |
| 153Eu    | 0.038 ppb             |                   |
| 158Gd    | 0.162 ppb             |                   |
| 164Dy    | 0.103 ppb             |                   |
| 165Ho    | 0.019 ppb             |                   |
| 166Er    | 0.056 ppb             |                   |
| 169Tm    | 0.007 ppb             |                   |
| 174Yb    | 0.055 ppb             |                   |
| 175Lu    | 0.006 ppb             |                   |
| 205Tl    | 0.019 ppb             |                   |
| 208Pb    | 1.466 ppb             |                   |
| 232Th    | 0.281 ppb             |                   |
| 238U     | 0.071 ppb             |                   |

| Category | Concentration average | Intensity average | Intensity RSD |
|----------|-----------------------|-------------------|---------------|
| 9Be      | 0.049 ppb             | 960 cps           |               |
| 11B      | 3.803 ppb             | 160,411 cps       |               |
| 24Mg     | 981.352 ppb           | 72,216,880 cps    |               |
| 27Al     | 1,332.301 ppb         | 127,521,465 cps   |               |
| 40Ca     | -559.657 ppb          | 7,475,988,112 cps |               |
| 51V      | 3.004 ppb             | 323,945 cps       |               |
| 52Cr     | 5.335 ppb             | 551,727 cps       |               |
| 55Mn     | 30.860 ppb            | 5,152,212 cps     |               |
| 56Fe     | 1,418.375 ppb         | 189,178,340 cps   |               |

| Category | Concentration average | Intensity average | Intensity RSD |
|----------|-----------------------|-------------------|---------------|
| 58Ni     | 13.906 ppb            | 763,259 cps       |               |
| 59Co     | 0.622 ppb             | 71,863 cps        |               |
| 63Cu     | 12.269 ppb            | 635,860 cps       |               |
| 64Zn     | 190.156 ppb           | 5,436,992 cps     |               |
| 69Ga     | 0.888 ppb             | 122,819 cps       |               |
| 75As     | 1.186 ppb             | 17,966 cps        |               |
| 80Se     | 45.618 ppb            | 10,438,277 cps    |               |
| 85Rb     | 3.708 ppb             | 519,665 cps       |               |
| 88Sr     | 13.925 ppb            | 2,739,788 cps     |               |
| 107Ag    | 0.081 ppb             | 10,044 cps        |               |
| 114Cd    | 0.057 ppb             | 4,177 cps         |               |
| 133Cs    | 0.264 ppb             | 60,926 cps        |               |
| 138Ba    | 9.107 ppb             | 1,985,841 cps     |               |
| 139La    | 0.924 ppb             | 232,815 cps       |               |
| 140Ce    | 1.853 ppb             | 477,307 cps       |               |
| 141Pr    | 0.220 ppb             | 76,162 cps        |               |
| 142Nd    | 1.083 ppb             | 140,952 cps       |               |
| 152Sm    | 0.160 ppb             | 16,594 cps        |               |
| 153Eu    | 0.038 ppb             | 7,576 cps         |               |
| 158Gd    | 0.162 ppb             | 14,338 cps        |               |
| 164Dy    | 0.103 ppb             | 12,219 cps        |               |
| 165Ho    | 0.019 ppb             | 7,689 cps         |               |
| 166Er    | 0.056 ppb             | 9,854 cps         |               |
| 169Tm    | 0.007 ppb             | 2,874 cps         |               |
| 174Yb    | 0.055 ppb             | 7,634 cps         |               |
| 175Lu    | 0.006 ppb             | 2,520 cps         |               |
| 205Tl    | 0.019 ppb             | 4,141 cps         |               |
| 208Pb    | 1.466 ppb             | 239,556 cps       |               |
| 232Th    | 0.281 ppb             | 88,727 cps        |               |
| 238U     | 0.071 ppb             | 23,850 cps        |               |

## Sample Summary

Instrument ID: iCAP Q

Analysis index: 12

Analysis name: 046757jian

Analysis started at: 8/25/2021 5:07:48 PM

User name: WINDOWS-UPCI4ER\Administrator

| Category | Concentration average | Concentration RSD |
|----------|-----------------------|-------------------|
| 9Be      | 0.075 ppb             |                   |
| 11B      | 5.140 ppb             |                   |
| 24Mg     | 1,760.735 ppb         |                   |
| 27Al     | 2,272.315 ppb         |                   |
| 40Ca     | -606.922 ppb          |                   |
| 51V      | 4.781 ppb             |                   |
| 52Cr     | 6.332 ppb             |                   |
| 55Mn     | 58.076 ppb            |                   |
| 56Fe     | 2,618.370 ppb         |                   |
| 58Ni     | 24.882 ppb            |                   |
| 59Co     | 1.121 ppb             |                   |
| 63Cu     | 14.957 ppb            |                   |
| 64Zn     | 179.107 ppb           |                   |
| 69Ga     | 1.484 ppb             |                   |
| 75As     | 1.585 ppb             |                   |
| 80Se     | 12.346 ppb            |                   |
| 85Rb     | 4.251 ppb             |                   |
| 88Sr     | 25.521 ppb            |                   |
| 107Ag    | 0.046 ppb             |                   |
| 114Cd    | 0.038 ppb             |                   |
| 133Cs    | 0.409 ppb             |                   |
| 138Ba    | 15.936 ppb            |                   |
| 139La    | 2.110 ppb             |                   |
| 140Ce    | 4.195 ppb             |                   |
| 141Pr    | 0.473 ppb             |                   |
| 142Nd    | 2.293 ppb             |                   |
| 152Sm    | 0.336 ppb             |                   |
| 153Eu    | 0.069 ppb             |                   |
| 158Gd    | 0.341 ppb             |                   |
| 164Dy    | 0.216 ppb             |                   |
| 165Ho    | 0.038 ppb             |                   |
| 166Er    | 0.104 ppb             |                   |
| 169Tm    | 0.014 ppb             |                   |
| 174Yb    | 0.079 ppb             |                   |
| 175Lu    | 0.011 ppb             |                   |
| 205Tl    | 0.022 ppb             |                   |
| 208Pb    | 2.063 ppb             |                   |
| 232Th    | 0.611 ppb             |                   |
| 238U     | 0.147 ppb             |                   |

| Category | Concentration average | Intensity average | Intensity RSD |
|----------|-----------------------|-------------------|---------------|
| 9Be      | 0.075 ppb             | 1,453 cps         |               |
| 11B      | 5.140 ppb             | 197,031 cps       |               |
| 24Mg     | 1,760.735 ppb         | 129,442,058 cps   |               |
| 27Al     | 2,272.315 ppb         | 217,374,980 cps   |               |
| 40Ca     | -606.922 ppb          | 7,555,425,481 cps |               |
| 51V      | 4.781 ppb             | 505,358 cps       |               |
| 52Cr     | 6.332 ppb             | 643,647 cps       |               |
| 55Mn     | 58.076 ppb            | 9,615,595 cps     |               |
| 56Fe     | 2,618.370 ppb         | 342,344,752 cps   |               |

| Category | Concentration average | Intensity average | Intensity RSD |
|----------|-----------------------|-------------------|---------------|
| 58Ni     | 24.882 ppb            | 1,344,459 cps     |               |
| 59Co     | 1.121 ppb             | 125,647 cps       |               |
| 63Cu     | 14.957 ppb            | 772,947 cps       |               |
| 64Zn     | 179.107 ppb           | 5,123,206 cps     |               |
| 69Ga     | 1.484 ppb             | 190,958 cps       |               |
| 75As     | 1.585 ppb             | 23,465 cps        |               |
| 80Se     | 12.346 ppb            | 10,269,521 cps    |               |
| 85Rb     | 4.251 ppb             | 594,932 cps       |               |
| 88Sr     | 25.521 ppb            | 4,995,400 cps     |               |
| 107Ag    | 0.046 ppb             | 6,912 cps         |               |
| 114Cd    | 0.038 ppb             | 3,224 cps         |               |
| 133Cs    | 0.409 ppb             | 94,269 cps        |               |
| 138Ba    | 15.936 ppb            | 3,346,991 cps     |               |
| 139La    | 2.110 ppb             | 531,580 cps       |               |
| 140Ce    | 4.195 ppb             | 1,079,614 cps     |               |
| 141Pr    | 0.473 ppb             | 163,528 cps       |               |
| 142Nd    | 2.293 ppb             | 298,171 cps       |               |
| 152Sm    | 0.336 ppb             | 34,802 cps        |               |
| 153Eu    | 0.069 ppb             | 13,704 cps        |               |
| 158Gd    | 0.341 ppb             | 30,144 cps        |               |
| 164Dy    | 0.216 ppb             | 25,560 cps        |               |
| 165Ho    | 0.038 ppb             | 15,009 cps        |               |
| 166Er    | 0.104 ppb             | 16,161 cps        |               |
| 169Tm    | 0.014 ppb             | 5,561 cps         |               |
| 174Yb    | 0.079 ppb             | 10,998 cps        |               |
| 175Lu    | 0.011 ppb             | 4,484 cps         |               |
| 205Tl    | 0.022 ppb             | 4,701 cps         |               |
| 208Pb    | 2.063 ppb             | 334,002 cps       |               |
| 232Th    | 0.611 ppb             | 191,026 cps       |               |
| 238U     | 0.147 ppb             | 49,194 cps        |               |

## Sample Summary

Instrument ID: iCAP Q

Analysis index: 13

Analysis name: 046314jian

Analysis started at: 8/25/2021 5:09:35 PM

User name: WINDOWS-UPCI4ER\Administrator

| Category | Concentration average | Concentration RSD |
|----------|-----------------------|-------------------|
| 9Be      | 0.086 ppb             |                   |
| 11B      | 7.044 ppb             |                   |
| 24Mg     | 2,065.201 ppb         |                   |
| 27Al     | 2,677.562 ppb         |                   |
| 40Ca     | -566.992 ppb          |                   |
| 51V      | 5.648 ppb             |                   |
| 52Cr     | 7.317 ppb             |                   |
| 55Mn     | 63.897 ppb            |                   |
| 56Fe     | 2,957.939 ppb         |                   |
| 58Ni     | 28.738 ppb            |                   |
| 59Co     | 1.251 ppb             |                   |
| 63Cu     | 13.125 ppb            |                   |
| 64Zn     | 174.581 ppb           |                   |
| 69Ga     | 1.662 ppb             |                   |
| 75As     | 1.517 ppb             |                   |
| 80Se     | 14.347 ppb            |                   |
| 85Rb     | 5.480 ppb             |                   |
| 88Sr     | 26.406 ppb            |                   |
| 107Ag    | 0.064 ppb             |                   |
| 114Cd    | 0.162 ppb             |                   |
| 133Cs    | 0.475 ppb             |                   |
| 138Ba    | 17.162 ppb            |                   |
| 139La    | 2.135 ppb             |                   |
| 140Ce    | 4.007 ppb             |                   |
| 141Pr    | 0.488 ppb             |                   |
| 142Nd    | 2.436 ppb             |                   |
| 152Sm    | 0.353 ppb             |                   |
| 153Eu    | 0.075 ppb             |                   |
| 158Gd    | 0.366 ppb             |                   |
| 164Dy    | 0.220 ppb             |                   |
| 165Ho    | 0.041 ppb             |                   |
| 166Er    | 0.119 ppb             |                   |
| 169Tm    | 0.015 ppb             |                   |
| 174Yb    | 0.089 ppb             |                   |
| 175Lu    | 0.013 ppb             |                   |
| 205Tl    | 0.032 ppb             |                   |
| 208Pb    | 2.057 ppb             |                   |
| 232Th    | 0.639 ppb             |                   |
| 238U     | 0.140 ppb             |                   |

| Category | Concentration average | Intensity average | Intensity RSD |
|----------|-----------------------|-------------------|---------------|
| 9Be      | 0.086 ppb             | 1,657 cps         |               |
| 11B      | 7.044 ppb             | 249,230 cps       |               |
| 24Mg     | 2,065.201 ppb         | 151,797,143 cps   |               |
| 27Al     | 2,677.562 ppb         | 256,111,510 cps   |               |
| 40Ca     | -566.992 ppb          | 7,488,316,011 cps |               |
| 51V      | 5.648 ppb             | 593,901 cps       |               |
| 52Cr     | 7.317 ppb             | 734,490 cps       |               |
| 55Mn     | 63.897 ppb            | 10,570,182 cps    |               |
| 56Fe     | 2,957.939 ppb         | 385,687,069 cps   |               |

| Category | Concentration average | Intensity average | Intensity RSD |
|----------|-----------------------|-------------------|---------------|
| 58Ni     | 28.738 ppb            | 1,548,611 cps     |               |
| 59Co     | 1.251 ppb             | 139,574 cps       |               |
| 63Cu     | 13.125 ppb            | 679,531 cps       |               |
| 64Zn     | 174.581 ppb           | 4,994,672 cps     |               |
| 69Ga     | 1.662 ppb             | 211,279 cps       |               |
| 75As     | 1.517 ppb             | 22,517 cps        |               |
| 80Se     | 14.347 ppb            | 10,279,667 cps    |               |
| 85Rb     | 5.480 ppb             | 765,408 cps       |               |
| 88Sr     | 26.406 ppb            | 5,167,661 cps     |               |
| 107Ag    | 0.064 ppb             | 8,550 cps         |               |
| 114Cd    | 0.162 ppb             | 9,534 cps         |               |
| 133Cs    | 0.475 ppb             | 109,467 cps       |               |
| 138Ba    | 17.162 ppb            | 3,591,377 cps     |               |
| 139La    | 2.135 ppb             | 537,720 cps       |               |
| 140Ce    | 4.007 ppb             | 1,031,247 cps     |               |
| 141Pr    | 0.488 ppb             | 168,706 cps       |               |
| 142Nd    | 2.436 ppb             | 316,771 cps       |               |
| 152Sm    | 0.353 ppb             | 36,527 cps        |               |
| 153Eu    | 0.075 ppb             | 14,836 cps        |               |
| 158Gd    | 0.366 ppb             | 32,365 cps        |               |
| 164Dy    | 0.220 ppb             | 26,057 cps        |               |
| 165Ho    | 0.041 ppb             | 16,448 cps        |               |
| 166Er    | 0.119 ppb             | 18,193 cps        |               |
| 169Tm    | 0.015 ppb             | 5,948 cps         |               |
| 174Yb    | 0.089 ppb             | 12,323 cps        |               |
| 175Lu    | 0.013 ppb             | 5,274 cps         |               |
| 205Tl    | 0.032 ppb             | 6,899 cps         |               |
| 208Pb    | 2.057 ppb             | 333,081 cps       |               |
| 232Th    | 0.639 ppb             | 199,707 cps       |               |
| 238U     | 0.140 ppb             | 46,925 cps        |               |

## Sample Summary

Instrument ID: iCAP Q

Analysis index: 14

Analysis name: 179396jian

Analysis started at: 8/25/2021 5:11:24 PM

User name: WINDOWS-UPCI4ER\Administrator

| Category | Concentration average | Concentration RSD |
|----------|-----------------------|-------------------|
| 9Be      | 0.047 ppb             |                   |
| 11B      | 2.529 ppb             |                   |
| 24Mg     | 1,231.414 ppb         |                   |
| 27Al     | 1,674.689 ppb         |                   |
| 40Ca     | -507.459 ppb          |                   |
| 51V      | 3.545 ppb             |                   |
| 52Cr     | 4.607 ppb             |                   |
| 55Mn     | 39.144 ppb            |                   |
| 56Fe     | 1,747.336 ppb         |                   |
| 58Ni     | 16.522 ppb            |                   |
| 59Co     | 0.763 ppb             |                   |
| 63Cu     | 16.089 ppb            |                   |
| 64Zn     | 197.033 ppb           |                   |
| 69Ga     | 1.074 ppb             |                   |
| 75As     | 1.038 ppb             |                   |
| 80Se     | 53.349 ppb            |                   |
| 85Rb     | 3.808 ppb             |                   |
| 88Sr     | 16.078 ppb            |                   |
| 107Ag    | 0.073 ppb             |                   |
| 114Cd    | 0.086 ppb             |                   |
| 133Cs    | 0.293 ppb             |                   |
| 138Ba    | 10.904 ppb            |                   |
| 139La    | 1.428 ppb             |                   |
| 140Ce    | 2.983 ppb             |                   |
| 141Pr    | 0.348 ppb             |                   |
| 142Nd    | 1.726 ppb             |                   |
| 152Sm    | 0.323 ppb             |                   |
| 153Eu    | 0.044 ppb             |                   |
| 158Gd    | 0.298 ppb             |                   |
| 164Dy    | 0.160 ppb             |                   |
| 165Ho    | 0.029 ppb             |                   |
| 166Er    | 0.063 ppb             |                   |
| 169Tm    | 0.009 ppb             |                   |
| 174Yb    | 0.053 ppb             |                   |
| 175Lu    | 0.009 ppb             |                   |
| 205Tl    | 0.020 ppb             |                   |
| 208Pb    | 1.647 ppb             |                   |
| 232Th    | 0.768 ppb             |                   |
| 238U     | 0.099 ppb             |                   |

| Category | Concentration average | Intensity average | Intensity RSD |
|----------|-----------------------|-------------------|---------------|
| 9Be      | 0.047 ppb             | 910 cps           |               |
| 11B      | 2.529 ppb             | 125,473 cps       |               |
| 24Mg     | 1,231.414 ppb         | 90,577,377 cps    |               |
| 27Al     | 1,674.689 ppb         | 160,249,415 cps   |               |
| 40Ca     | -507.459 ppb          | 7,388,262,563 cps |               |
| 51V      | 3.545 ppb             | 379,199 cps       |               |
| 52Cr     | 4.607 ppb             | 484,643 cps       |               |
| 55Mn     | 39.144 ppb            | 6,510,765 cps     |               |
| 56Fe     | 1,747.336 ppb         | 231,166,678 cps   |               |

| Category | Concentration average | Intensity average | Intensity RSD |
|----------|-----------------------|-------------------|---------------|
| 58Ni     | 16.522 ppb            | 901,761 cps       |               |
| 59Co     | 0.763 ppb             | 87,056 cps        |               |
| 63Cu     | 16.089 ppb            | 830,650 cps       |               |
| 64Zn     | 197.033 ppb           | 5,632,295 cps     |               |
| 69Ga     | 1.074 ppb             | 144,030 cps       |               |
| 75As     | 1.038 ppb             | 15,917 cps        |               |
| 80Se     | 53.349 ppb            | 10,477,493 cps    |               |
| 85Rb     | 3.808 ppb             | 533,571 cps       |               |
| 88Sr     | 16.078 ppb            | 3,158,630 cps     |               |
| 107Ag    | 0.073 ppb             | 9,333 cps         |               |
| 114Cd    | 0.086 ppb             | 5,695 cps         |               |
| 133Cs    | 0.293 ppb             | 67,714 cps        |               |
| 138Ba    | 10.904 ppb            | 2,344,135 cps     |               |
| 139La    | 1.428 ppb             | 359,750 cps       |               |
| 140Ce    | 2.983 ppb             | 767,931 cps       |               |
| 141Pr    | 0.348 ppb             | 120,321 cps       |               |
| 142Nd    | 1.726 ppb             | 224,534 cps       |               |
| 152Sm    | 0.323 ppb             | 33,455 cps        |               |
| 153Eu    | 0.044 ppb             | 8,760 cps         |               |
| 158Gd    | 0.298 ppb             | 26,298 cps        |               |
| 164Dy    | 0.160 ppb             | 18,971 cps        |               |
| 165Ho    | 0.029 ppb             | 11,632 cps        |               |
| 166Er    | 0.063 ppb             | 10,815 cps        |               |
| 169Tm    | 0.009 ppb             | 3,851 cps         |               |
| 174Yb    | 0.053 ppb             | 7,336 cps         |               |
| 175Lu    | 0.009 ppb             | 3,584 cps         |               |
| 205Tl    | 0.020 ppb             | 4,351 cps         |               |
| 208Pb    | 1.647 ppb             | 268,236 cps       |               |
| 232Th    | 0.768 ppb             | 239,475 cps       |               |
| 238U     | 0.099 ppb             | 33,291 cps        |               |

## Sample Summary

Instrument ID: iCAP Q

Analysis index: 15

Analysis name: 046288jian

Analysis started at: 8/25/2021 5:13:18 PM

User name: WINDOWS-UPCI4ER\Administrator

| Category | Concentration average | Concentration RSD |
|----------|-----------------------|-------------------|
| 9Be      | 0.072 ppb             |                   |
| 11B      | 4.213 ppb             |                   |
| 24Mg     | 1,689.362 ppb         |                   |
| 27Al     | 2,080.254 ppb         |                   |
| 40Ca     | -638.365 ppb          |                   |
| 51V      | 4.497 ppb             |                   |
| 52Cr     | 7.470 ppb             |                   |
| 55Mn     | 50.749 ppb            |                   |
| 56Fe     | 2,263.455 ppb         |                   |
| 58Ni     | 25.972 ppb            |                   |
| 59Co     | 0.992 ppb             |                   |
| 63Cu     | 18.616 ppb            |                   |
| 64Zn     | 254.725 ppb           |                   |
| 69Ga     | 1.970 ppb             |                   |
| 75As     | 1.918 ppb             |                   |
| 80Se     | 65.975 ppb            |                   |
| 85Rb     | 4.552 ppb             |                   |
| 88Sr     | 88.676 ppb            |                   |
| 107Ag    | 0.072 ppb             |                   |
| 114Cd    | 0.070 ppb             |                   |
| 133Cs    | 0.351 ppb             |                   |
| 138Ba    | 27.182 ppb            |                   |
| 139La    | 1.395 ppb             |                   |
| 140Ce    | 2.802 ppb             |                   |
| 141Pr    | 0.320 ppb             |                   |
| 142Nd    | 1.539 ppb             |                   |
| 152Sm    | 0.242 ppb             |                   |
| 153Eu    | 0.053 ppb             |                   |
| 158Gd    | 0.250 ppb             |                   |
| 164Dy    | 0.152 ppb             |                   |
| 165Ho    | 0.028 ppb             |                   |
| 166Er    | 0.063 ppb             |                   |
| 169Tm    | 0.011 ppb             |                   |
| 174Yb    | 0.064 ppb             |                   |
| 175Lu    | 0.009 ppb             |                   |
| 205Tl    | 0.025 ppb             |                   |
| 208Pb    | 3.739 ppb             |                   |
| 232Th    | 0.425 ppb             |                   |
| 238U     | 0.331 ppb             |                   |

| Category | Concentration average | Intensity average | Intensity RSD |
|----------|-----------------------|-------------------|---------------|
| 9Be      | 0.072 ppb             | 1,387 cps         |               |
| 11B      | 4.213 ppb             | 171,631 cps       |               |
| 24Mg     | 1,689.362 ppb         | 124,201,624 cps   |               |
| 27Al     | 2,080.254 ppb         | 199,016,364 cps   |               |
| 40Ca     | -638.365 ppb          | 7,608,270,216 cps |               |
| 51V      | 4.497 ppb             | 476,387 cps       |               |
| 52Cr     | 7.470 ppb             | 748,612 cps       |               |
| 55Mn     | 50.749 ppb            | 8,413,961 cps     |               |
| 56Fe     | 2,263.455 ppb         | 297,043,726 cps   |               |

| Category | Concentration average | Intensity average | Intensity RSD |
|----------|-----------------------|-------------------|---------------|
| 58Ni     | 25.972 ppb            | 1,402,162 cps     |               |
| 59Co     | 0.992 ppb             | 111,697 cps       |               |
| 63Cu     | 18.616 ppb            | 959,505 cps       |               |
| 64Zn     | 254.725 ppb           | 7,270,711 cps     |               |
| 69Ga     | 1.970 ppb             | 246,566 cps       |               |
| 75As     | 1.918 ppb             | 28,045 cps        |               |
| 80Se     | 65.975 ppb            | 10,541,531 cps    |               |
| 85Rb     | 4.552 ppb             | 636,765 cps       |               |
| 88Sr     | 88.676 ppb            | 17,280,251 cps    |               |
| 107Ag    | 0.072 ppb             | 9,233 cps         |               |
| 114Cd    | 0.070 ppb             | 4,844 cps         |               |
| 133Cs    | 0.351 ppb             | 80,996 cps        |               |
| 138Ba    | 27.182 ppb            | 5,588,584 cps     |               |
| 139La    | 1.395 ppb             | 351,598 cps       |               |
| 140Ce    | 2.802 ppb             | 721,312 cps       |               |
| 141Pr    | 0.320 ppb             | 110,496 cps       |               |
| 142Nd    | 1.539 ppb             | 200,188 cps       |               |
| 152Sm    | 0.242 ppb             | 25,049 cps        |               |
| 153Eu    | 0.053 ppb             | 10,521 cps        |               |
| 158Gd    | 0.250 ppb             | 22,093 cps        |               |
| 164Dy    | 0.152 ppb             | 18,093 cps        |               |
| 165Ho    | 0.028 ppb             | 11,022 cps        |               |
| 166Er    | 0.063 ppb             | 10,828 cps        |               |
| 169Tm    | 0.011 ppb             | 4,504 cps         |               |
| 174Yb    | 0.064 ppb             | 8,917 cps         |               |
| 175Lu    | 0.009 ppb             | 3,480 cps         |               |
| 205Tl    | 0.025 ppb             | 5,448 cps         |               |
| 208Pb    | 3.739 ppb             | 598,966 cps       |               |
| 232Th    | 0.425 ppb             | 133,382 cps       |               |
| 238U     | 0.331 ppb             | 110,583 cps       |               |

## Sample Summary

Instrument ID: iCAP Q

Analysis index: 16

Analysis name: 179421jian

Analysis started at: 8/25/2021 5:15:04 PM

User name: WINDOWS-UPCI4ER\Administrator

| Category | Concentration average | Concentration RSD |
|----------|-----------------------|-------------------|
| 9Be      | 0.062 ppb             |                   |
| 11B      | 6.404 ppb             |                   |
| 24Mg     | 1,389.984 ppb         |                   |
| 27Al     | 1,930.896 ppb         |                   |
| 40Ca     | -603.705 ppb          |                   |
| 51V      | 4.002 ppb             |                   |
| 52Cr     | 4.867 ppb             |                   |
| 55Mn     | 44.953 ppb            |                   |
| 56Fe     | 1,949.307 ppb         |                   |
| 58Ni     | 19.156 ppb            |                   |
| 59Co     | 2.183 ppb             |                   |
| 63Cu     | 24.264 ppb            |                   |
| 64Zn     | 198.380 ppb           |                   |
| 69Ga     | 1.239 ppb             |                   |
| 75As     | 1.265 ppb             |                   |
| 80Se     | 61.965 ppb            |                   |
| 85Rb     | 4.393 ppb             |                   |
| 88Sr     | 21.224 ppb            |                   |
| 107Ag    | 0.225 ppb             |                   |
| 114Cd    | 0.079 ppb             |                   |
| 133Cs    | 0.350 ppb             |                   |
| 138Ba    | 13.640 ppb            |                   |
| 139La    | 1.357 ppb             |                   |
| 140Ce    | 2.594 ppb             |                   |
| 141Pr    | 0.306 ppb             |                   |
| 142Nd    | 1.503 ppb             |                   |
| 152Sm    | 0.234 ppb             |                   |
| 153Eu    | 0.047 ppb             |                   |
| 158Gd    | 0.235 ppb             |                   |
| 164Dy    | 0.162 ppb             |                   |
| 165Ho    | 0.026 ppb             |                   |
| 166Er    | 0.080 ppb             |                   |
| 169Tm    | 0.011 ppb             |                   |
| 174Yb    | 0.059 ppb             |                   |
| 175Lu    | 0.009 ppb             |                   |
| 205Tl    | 0.024 ppb             |                   |
| 208Pb    | 2.825 ppb             |                   |
| 232Th    | 0.438 ppb             |                   |
| 238U     | 0.102 ppb             |                   |

| Category | Concentration average | Intensity average | Intensity RSD |
|----------|-----------------------|-------------------|---------------|
| 9Be      | 0.062 ppb             | 1,203 cps         |               |
| 11B      | 6.404 ppb             | 231,693 cps       |               |
| 24Mg     | 1,389.984 ppb         | 102,220,142 cps   |               |
| 27Al     | 1,930.896 ppb         | 184,739,657 cps   |               |
| 40Ca     | -603.705 ppb          | 7,550,018,635 cps |               |
| 51V      | 4.002 ppb             | 425,924 cps       |               |
| 52Cr     | 4.867 ppb             | 508,605 cps       |               |
| 55Mn     | 44.953 ppb            | 7,463,389 cps     |               |
| 56Fe     | 1,949.307 ppb         | 256,946,008 cps   |               |

| Category | Concentration average | Intensity average | Intensity RSD |
|----------|-----------------------|-------------------|---------------|
| 58Ni     | 19.156 ppb            | 1,041,249 cps     |               |
| 59Co     | 2.183 ppb             | 239,896 cps       |               |
| 63Cu     | 24.264 ppb            | 1,247,435 cps     |               |
| 64Zn     | 198.380 ppb           | 5,670,559 cps     |               |
| 69Ga     | 1.239 ppb             | 162,983 cps       |               |
| 75As     | 1.265 ppb             | 19,045 cps        |               |
| 80Se     | 61.965 ppb            | 10,521,192 cps    |               |
| 85Rb     | 4.393 ppb             | 614,648 cps       |               |
| 88Sr     | 21.224 ppb            | 4,159,556 cps     |               |
| 107Ag    | 0.225 ppb             | 23,332 cps        |               |
| 114Cd    | 0.079 ppb             | 5,328 cps         |               |
| 133Cs    | 0.350 ppb             | 80,744 cps        |               |
| 138Ba    | 13.640 ppb            | 2,889,282 cps     |               |
| 139La    | 1.357 ppb             | 341,994 cps       |               |
| 140Ce    | 2.594 ppb             | 667,666 cps       |               |
| 141Pr    | 0.306 ppb             | 105,916 cps       |               |
| 142Nd    | 1.503 ppb             | 195,584 cps       |               |
| 152Sm    | 0.234 ppb             | 24,264 cps        |               |
| 153Eu    | 0.047 ppb             | 9,330 cps         |               |
| 158Gd    | 0.235 ppb             | 20,767 cps        |               |
| 164Dy    | 0.162 ppb             | 19,272 cps        |               |
| 165Ho    | 0.026 ppb             | 10,461 cps        |               |
| 166Er    | 0.080 ppb             | 13,027 cps        |               |
| 169Tm    | 0.011 ppb             | 4,297 cps         |               |
| 174Yb    | 0.059 ppb             | 8,209 cps         |               |
| 175Lu    | 0.009 ppb             | 3,664 cps         |               |
| 205Tl    | 0.024 ppb             | 5,171 cps         |               |
| 208Pb    | 2.825 ppb             | 454,366 cps       |               |
| 232Th    | 0.438 ppb             | 137,242 cps       |               |
| 238U     | 0.102 ppb             | 34,133 cps        |               |

## Sample Summary

Instrument ID: iCAP Q

Analysis index: 17

Analysis name: 04745jian

Analysis started at: 8/25/2021 5:16:54 PM

User name: WINDOWS-UPCI4ER\Administrator

| Category | Concentration average | Concentration RSD |
|----------|-----------------------|-------------------|
| 9Be      | 0.082 ppb             |                   |
| 11B      | 5.360 ppb             |                   |
| 24Mg     | 1,897.752 ppb         |                   |
| 27Al     | 2,469.449 ppb         |                   |
| 40Ca     | -638.712 ppb          |                   |
| 51V      | 4.960 ppb             |                   |
| 52Cr     | 6.121 ppb             |                   |
| 55Mn     | 56.552 ppb            |                   |
| 56Fe     | 2,758.756 ppb         |                   |
| 58Ni     | 28.822 ppb            |                   |
| 59Co     | 1.149 ppb             |                   |
| 63Cu     | 19.616 ppb            |                   |
| 64Zn     | 247.679 ppb           |                   |
| 69Ga     | 2.009 ppb             |                   |
| 75As     | 1.315 ppb             |                   |
| 80Se     | 98.102 ppb            |                   |
| 85Rb     | 5.084 ppb             |                   |
| 88Sr     | 88.242 ppb            |                   |
| 107Ag    | 0.075 ppb             |                   |
| 114Cd    | 0.088 ppb             |                   |
| 133Cs    | 0.432 ppb             |                   |
| 138Ba    | 25.193 ppb            |                   |
| 139La    | 1.889 ppb             |                   |
| 140Ce    | 3.545 ppb             |                   |
| 141Pr    | 0.436 ppb             |                   |
| 142Nd    | 2.061 ppb             |                   |
| 152Sm    | 0.312 ppb             |                   |
| 153Eu    | 0.071 ppb             |                   |
| 158Gd    | 0.316 ppb             |                   |
| 164Dy    | 0.198 ppb             |                   |
| 165Ho    | 0.036 ppb             |                   |
| 166Er    | 0.097 ppb             |                   |
| 169Tm    | 0.014 ppb             |                   |
| 174Yb    | 0.077 ppb             |                   |
| 175Lu    | 0.011 ppb             |                   |
| 205Tl    | 0.024 ppb             |                   |
| 208Pb    | 4.077 ppb             |                   |
| 232Th    | 1.038 ppb             |                   |
| 238U     | 0.404 ppb             |                   |

| Category | Concentration average | Intensity average | Intensity RSD |
|----------|-----------------------|-------------------|---------------|
| 9Be      | 0.082 ppb             | 1,593 cps         |               |
| 11B      | 5.360 ppb             | 203,079 cps       |               |
| 24Mg     | 1,897.752 ppb         | 139,502,393 cps   |               |
| 27Al     | 2,469.449 ppb         | 236,218,527 cps   |               |
| 40Ca     | -638.712 ppb          | 7,608,853,395 cps |               |
| 51V      | 4.960 ppb             | 523,698 cps       |               |
| 52Cr     | 6.121 ppb             | 624,254 cps       |               |
| 55Mn     | 56.552 ppb            | 9,365,604 cps     |               |
| 56Fe     | 2,758.756 ppb         | 360,263,540 cps   |               |

| Category | Concentration average | Intensity average | Intensity RSD |
|----------|-----------------------|-------------------|---------------|
| 58Ni     | 28.822 ppb            | 1,553,051 cps     |               |
| 59Co     | 1.149 ppb             | 128,596 cps       |               |
| 63Cu     | 19.616 ppb            | 1,010,453 cps     |               |
| 64Zn     | 247.679 ppb           | 7,070,601 cps     |               |
| 69Ga     | 2.009 ppb             | 251,014 cps       |               |
| 75As     | 1.315 ppb             | 19,742 cps        |               |
| 80Se     | 98.102 ppb            | 10,704,482 cps    |               |
| 85Rb     | 5.084 ppb             | 710,498 cps       |               |
| 88Sr     | 88.242 ppb            | 17,195,769 cps    |               |
| 107Ag    | 0.075 ppb             | 9,567 cps         |               |
| 114Cd    | 0.088 ppb             | 5,778 cps         |               |
| 133Cs    | 0.432 ppb             | 99,613 cps        |               |
| 138Ba    | 25.193 ppb            | 5,192,086 cps     |               |
| 139La    | 1.889 ppb             | 475,775 cps       |               |
| 140Ce    | 3.545 ppb             | 912,286 cps       |               |
| 141Pr    | 0.436 ppb             | 150,817 cps       |               |
| 142Nd    | 2.061 ppb             | 268,123 cps       |               |
| 152Sm    | 0.312 ppb             | 32,305 cps        |               |
| 153Eu    | 0.071 ppb             | 13,931 cps        |               |
| 158Gd    | 0.316 ppb             | 27,908 cps        |               |
| 164Dy    | 0.198 ppb             | 23,502 cps        |               |
| 165Ho    | 0.036 ppb             | 14,322 cps        |               |
| 166Er    | 0.097 ppb             | 15,203 cps        |               |
| 169Tm    | 0.014 ppb             | 5,481 cps         |               |
| 174Yb    | 0.077 ppb             | 10,761 cps        |               |
| 175Lu    | 0.011 ppb             | 4,474 cps         |               |
| 205Tl    | 0.024 ppb             | 5,051 cps         |               |
| 208Pb    | 4.077 ppb             | 652,307 cps       |               |
| 232Th    | 1.038 ppb             | 323,293 cps       |               |
| 238U     | 0.404 ppb             | 135,018 cps       |               |

## Sample Summary

Instrument ID: iCAP Q

Analysis index: 18

Analysis name: 04628ti

Analysis started at: 8/25/2021 5:18:41 PM

User name: WINDOWS-UPCI4ER\Administrator

| Category | Concentration average | Concentration RSD |
|----------|-----------------------|-------------------|
| 9Be      | 0.093 ppb             |                   |
| 11B      | 11.662 ppb            |                   |
| 24Mg     | 2,346.446 ppb         |                   |
| 27Al     | 2,958.407 ppb         |                   |
| 40Ca     | -553.907 ppb          |                   |
| 51V      | 6.551 ppb             |                   |
| 52Cr     | 9.902 ppb             |                   |
| 55Mn     | 72.483 ppb            |                   |
| 56Fe     | 3,446.258 ppb         |                   |
| 58Ni     | 32.484 ppb            |                   |
| 59Co     | 1.477 ppb             |                   |
| 63Cu     | 22.889 ppb            |                   |
| 64Zn     | 163.362 ppb           |                   |
| 69Ga     | 1.809 ppb             |                   |
| 75As     | 1.879 ppb             |                   |
| 80Se     | 51.610 ppb            |                   |
| 85Rb     | 5.511 ppb             |                   |
| 88Sr     | 28.782 ppb            |                   |
| 107Ag    | 0.068 ppb             |                   |
| 114Cd    | 0.079 ppb             |                   |
| 133Cs    | 0.509 ppb             |                   |
| 138Ba    | 18.777 ppb            |                   |
| 139La    | 2.916 ppb             |                   |
| 140Ce    | 5.419 ppb             |                   |
| 141Pr    | 0.647 ppb             |                   |
| 142Nd    | 3.222 ppb             |                   |
| 152Sm    | 0.449 ppb             |                   |
| 153Eu    | 0.089 ppb             |                   |
| 158Gd    | 0.480 ppb             |                   |
| 164Dy    | 0.273 ppb             |                   |
| 165Ho    | 0.048 ppb             |                   |
| 166Er    | 0.144 ppb             |                   |
| 169Tm    | 0.017 ppb             |                   |
| 174Yb    | 0.097 ppb             |                   |
| 175Lu    | 0.014 ppb             |                   |
| 205Tl    | 0.030 ppb             |                   |
| 208Pb    | 2.673 ppb             |                   |
| 232Th    | 0.837 ppb             |                   |
| 238U     | 0.184 ppb             |                   |

| Category | Concentration average | Intensity average | Intensity RSD |
|----------|-----------------------|-------------------|---------------|
| 9Be      | 0.093 ppb             | 1,803 cps         |               |
| 11B      | 11.662 ppb            | 375,790 cps       |               |
| 24Mg     | 2,346.446 ppb         | 172,447,198 cps   |               |
| 27Al     | 2,958.407 ppb         | 282,956,828 cps   |               |
| 40Ca     | -553.907 ppb          | 7,466,324,523 cps |               |
| 51V      | 6.551 ppb             | 686,106 cps       |               |
| 52Cr     | 9.902 ppb             | 972,918 cps       |               |
| 55Mn     | 72.483 ppb            | 11,978,216 cps    |               |
| 56Fe     | 3,446.258 ppb         | 448,015,716 cps   |               |

| Category | Concentration average | Intensity average | Intensity RSD |
|----------|-----------------------|-------------------|---------------|
| 58Ni     | 32.484 ppb            | 1,746,990 cps     |               |
| 59Co     | 1.477 ppb             | 163,909 cps       |               |
| 63Cu     | 22.889 ppb            | 1,177,339 cps     |               |
| 64Zn     | 163.362 ppb           | 4,676,079 cps     |               |
| 69Ga     | 1.809 ppb             | 228,183 cps       |               |
| 75As     | 1.879 ppb             | 27,512 cps        |               |
| 80Se     | 51.610 ppb            | 10,468,668 cps    |               |
| 85Rb     | 5.511 ppb             | 769,689 cps       |               |
| 88Sr     | 28.782 ppb            | 5,629,861 cps     |               |
| 107Ag    | 0.068 ppb             | 8,877 cps         |               |
| 114Cd    | 0.079 ppb             | 5,311 cps         |               |
| 133Cs    | 0.509 ppb             | 117,252 cps       |               |
| 138Ba    | 18.777 ppb            | 3,913,169 cps     |               |
| 139La    | 2.916 ppb             | 734,296 cps       |               |
| 140Ce    | 5.419 ppb             | 1,394,131 cps     |               |
| 141Pr    | 0.647 ppb             | 223,630 cps       |               |
| 142Nd    | 3.222 ppb             | 419,017 cps       |               |
| 152Sm    | 0.449 ppb             | 46,453 cps        |               |
| 153Eu    | 0.089 ppb             | 17,606 cps        |               |
| 158Gd    | 0.480 ppb             | 42,419 cps        |               |
| 164Dy    | 0.273 ppb             | 32,258 cps        |               |
| 165Ho    | 0.048 ppb             | 18,928 cps        |               |
| 166Er    | 0.144 ppb             | 21,378 cps        |               |
| 169Tm    | 0.017 ppb             | 6,722 cps         |               |
| 174Yb    | 0.097 ppb             | 13,487 cps        |               |
| 175Lu    | 0.014 ppb             | 5,798 cps         |               |
| 205Tl    | 0.030 ppb             | 6,485 cps         |               |
| 208Pb    | 2.673 ppb             | 430,482 cps       |               |
| 232Th    | 0.837 ppb             | 260,978 cps       |               |
| 238U     | 0.184 ppb             | 61,452 cps        |               |

## Sample Summary

Instrument ID: iCAP Q

Analysis index: 19

Analysis name: 033892ti

Analysis started at: 8/25/2021 5:20:26 PM

User name: WINDOWS-UPCI4ER\Administrator

| Category | Concentration average | Concentration RSD |
|----------|-----------------------|-------------------|
| 9Be      | 0.030 ppb             |                   |
| 11B      | 6.270 ppb             |                   |
| 24Mg     | 729.826 ppb           |                   |
| 27Al     | 953.408 ppb           |                   |
| 40Ca     | -465.185 ppb          |                   |
| 51V      | 2.324 ppb             |                   |
| 52Cr     | 3.721 ppb             |                   |
| 55Mn     | 22.291 ppb            |                   |
| 56Fe     | 1,077.390 ppb         |                   |
| 58Ni     | 11.133 ppb            |                   |
| 59Co     | 0.500 ppb             |                   |
| 63Cu     | 13.336 ppb            |                   |
| 64Zn     | 177.137 ppb           |                   |
| 69Ga     | 0.737 ppb             |                   |
| 75As     | 1.131 ppb             |                   |
| 80Se     | 69.241 ppb            |                   |
| 85Rb     | 2.464 ppb             |                   |
| 88Sr     | 11.246 ppb            |                   |
| 107Ag    | 0.212 ppb             |                   |
| 114Cd    | 0.053 ppb             |                   |
| 133Cs    | 0.162 ppb             |                   |
| 138Ba    | 8.300 ppb             |                   |
| 139La    | 0.765 ppb             |                   |
| 140Ce    | 1.523 ppb             |                   |
| 141Pr    | 0.173 ppb             |                   |
| 142Nd    | 0.872 ppb             |                   |
| 152Sm    | 0.129 ppb             |                   |
| 153Eu    | 0.027 ppb             |                   |
| 158Gd    | 0.129 ppb             |                   |
| 164Dy    | 0.080 ppb             |                   |
| 165Ho    | 0.015 ppb             |                   |
| 166Er    | 0.047 ppb             |                   |
| 169Tm    | 0.005 ppb             |                   |
| 174Yb    | 0.032 ppb             |                   |
| 175Lu    | 0.005 ppb             |                   |
| 205Tl    | 0.015 ppb             |                   |
| 208Pb    | 1.571 ppb             |                   |
| 232Th    | 0.239 ppb             |                   |
| 238U     | 0.106 ppb             |                   |

| Category | Concentration average | Intensity average | Intensity RSD |
|----------|-----------------------|-------------------|---------------|
| 9Be      | 0.030 ppb             | 580 cps           |               |
| 11B      | 6.270 ppb             | 228,014 cps       |               |
| 24Mg     | 729.826 ppb           | 53,748,849 cps    |               |
| 27Al     | 953.408 ppb           | 91,304,019 cps    |               |
| 40Ca     | -465.185 ppb          | 7,317,213,157 cps |               |
| 51V      | 2.324 ppb             | 254,598 cps       |               |
| 52Cr     | 3.721 ppb             | 402,936 cps       |               |
| 55Mn     | 22.291 ppb            | 3,746,900 cps     |               |
| 56Fe     | 1,077.390 ppb         | 145,655,228 cps   |               |

| Category | Concentration average | Intensity average | Intensity RSD |
|----------|-----------------------|-------------------|---------------|
| 58Ni     | 11.133 ppb            | 616,412 cps       |               |
| 59Co     | 0.500 ppb             | 58,818 cps        |               |
| 63Cu     | 13.336 ppb            | 690,269 cps       |               |
| 64Zn     | 177.137 ppb           | 5,067,267 cps     |               |
| 69Ga     | 0.737 ppb             | 105,561 cps       |               |
| 75As     | 1.131 ppb             | 17,195 cps        |               |
| 80Se     | 69.241 ppb            | 10,558,095 cps    |               |
| 85Rb     | 2.464 ppb             | 347,083 cps       |               |
| 88Sr     | 11.246 ppb            | 2,218,814 cps     |               |
| 107Ag    | 0.212 ppb             | 22,146 cps        |               |
| 114Cd    | 0.053 ppb             | 4,007 cps         |               |
| 133Cs    | 0.162 ppb             | 37,577 cps        |               |
| 138Ba    | 8.300 ppb             | 1,824,946 cps     |               |
| 139La    | 0.765 ppb             | 192,983 cps       |               |
| 140Ce    | 1.523 ppb             | 392,390 cps       |               |
| 141Pr    | 0.173 ppb             | 59,784 cps        |               |
| 142Nd    | 0.872 ppb             | 113,570 cps       |               |
| 152Sm    | 0.129 ppb             | 13,411 cps        |               |
| 153Eu    | 0.027 ppb             | 5,314 cps         |               |
| 158Gd    | 0.129 ppb             | 11,435 cps        |               |
| 164Dy    | 0.080 ppb             | 9,570 cps         |               |
| 165Ho    | 0.015 ppb             | 5,901 cps         |               |
| 166Er    | 0.047 ppb             | 8,750 cps         |               |
| 169Tm    | 0.005 ppb             | 2,097 cps         |               |
| 174Yb    | 0.032 ppb             | 4,444 cps         |               |
| 175Lu    | 0.005 ppb             | 1,910 cps         |               |
| 205Tl    | 0.015 ppb             | 3,210 cps         |               |
| 208Pb    | 1.571 ppb             | 256,183 cps       |               |
| 232Th    | 0.239 ppb             | 75,656 cps        |               |
| 238U     | 0.106 ppb             | 35,731 cps        |               |

## Sample Summary

Instrument ID: iCAP Q

Analysis index: 20

Analysis name: 046750ti

Analysis started at: 8/25/2021 5:22:12 PM

User name: WINDOWS-UPCI4ER\Administrator

| Category | Concentration average | Concentration RSD |
|----------|-----------------------|-------------------|
| 9Be      | 0.090 ppb             |                   |
| 11B      | 5.113 ppb             |                   |
| 24Mg     | 2,046.849 ppb         |                   |
| 27Al     | 2,707.889 ppb         |                   |
| 40Ca     | -516.889 ppb          |                   |
| 51V      | 5.615 ppb             |                   |
| 52Cr     | 6.186 ppb             |                   |
| 55Mn     | 65.281 ppb            |                   |
| 56Fe     | 2,981.566 ppb         |                   |
| 58Ni     | 28.583 ppb            |                   |
| 59Co     | 1.286 ppb             |                   |
| 63Cu     | 13.265 ppb            |                   |
| 64Zn     | 204.997 ppb           |                   |
| 69Ga     | 1.683 ppb             |                   |
| 75As     | 1.520 ppb             |                   |
| 80Se     | 57.527 ppb            |                   |
| 85Rb     | 5.368 ppb             |                   |
| 88Sr     | 30.620 ppb            |                   |
| 107Ag    | 0.157 ppb             |                   |
| 114Cd    | 0.072 ppb             |                   |
| 133Cs    | 0.506 ppb             |                   |
| 138Ba    | 18.371 ppb            |                   |
| 139La    | 2.164 ppb             |                   |
| 140Ce    | 4.389 ppb             |                   |
| 141Pr    | 0.520 ppb             |                   |
| 142Nd    | 2.599 ppb             |                   |
| 152Sm    | 0.378 ppb             |                   |
| 153Eu    | 0.077 ppb             |                   |
| 158Gd    | 0.399 ppb             |                   |
| 164Dy    | 0.241 ppb             |                   |
| 165Ho    | 0.047 ppb             |                   |
| 166Er    | 0.118 ppb             |                   |
| 169Tm    | 0.017 ppb             |                   |
| 174Yb    | 0.090 ppb             |                   |
| 175Lu    | 0.015 ppb             |                   |
| 205Tl    | 0.030 ppb             |                   |
| 208Pb    | 2.228 ppb             |                   |
| 232Th    | 0.762 ppb             |                   |
| 238U     | 0.154 ppb             |                   |

| Category | Concentration average | Intensity average | Intensity RSD |
|----------|-----------------------|-------------------|---------------|
| 9Be      | 0.090 ppb             | 1,743 cps         |               |
| 11B      | 5.113 ppb             | 196,312 cps       |               |
| 24Mg     | 2,046.849 ppb         | 150,449,686 cps   |               |
| 27Al     | 2,707.889 ppb         | 259,010,433 cps   |               |
| 40Ca     | -516.889 ppb          | 7,404,110,905 cps |               |
| 51V      | 5.615 ppb             | 590,515 cps       |               |
| 52Cr     | 6.186 ppb             | 630,211 cps       |               |
| 55Mn     | 65.281 ppb            | 10,797,195 cps    |               |
| 56Fe     | 2,981.566 ppb         | 388,702,838 cps   |               |

| Category | Concentration average | Intensity average | Intensity RSD |
|----------|-----------------------|-------------------|---------------|
| 58Ni     | 28.583 ppb            | 1,540,428 cps     |               |
| 59Co     | 1.286 ppb             | 143,356 cps       |               |
| 63Cu     | 13.265 ppb            | 686,676 cps       |               |
| 64Zn     | 204.997 ppb           | 5,858,481 cps     |               |
| 69Ga     | 1.683 ppb             | 213,790 cps       |               |
| 75As     | 1.520 ppb             | 22,567 cps        |               |
| 80Se     | 57.527 ppb            | 10,498,681 cps    |               |
| 85Rb     | 5.368 ppb             | 749,973 cps       |               |
| 88Sr     | 30.620 ppb            | 5,987,295 cps     |               |
| 107Ag    | 0.157 ppb             | 17,022 cps        |               |
| 114Cd    | 0.072 ppb             | 4,948 cps         |               |
| 133Cs    | 0.506 ppb             | 116,519 cps       |               |
| 138Ba    | 18.371 ppb            | 3,832,250 cps     |               |
| 139La    | 2.164 ppb             | 545,157 cps       |               |
| 140Ce    | 4.389 ppb             | 1,129,493 cps     |               |
| 141Pr    | 0.520 ppb             | 179,738 cps       |               |
| 142Nd    | 2.599 ppb             | 337,937 cps       |               |
| 152Sm    | 0.378 ppb             | 39,138 cps        |               |
| 153Eu    | 0.077 ppb             | 15,123 cps        |               |
| 158Gd    | 0.399 ppb             | 35,270 cps        |               |
| 164Dy    | 0.241 ppb             | 28,506 cps        |               |
| 165Ho    | 0.047 ppb             | 18,754 cps        |               |
| 166Er    | 0.118 ppb             | 17,966 cps        |               |
| 169Tm    | 0.017 ppb             | 6,708 cps         |               |
| 174Yb    | 0.090 ppb             | 12,580 cps        |               |
| 175Lu    | 0.015 ppb             | 5,901 cps         |               |
| 205Tl    | 0.030 ppb             | 6,305 cps         |               |
| 208Pb    | 2.228 ppb             | 360,018 cps       |               |
| 232Th    | 0.762 ppb             | 237,760 cps       |               |
| 238U     | 0.154 ppb             | 51,624 cps        |               |

## Sample Summary

Instrument ID: iCAP Q

Analysis index: 21

Analysis name: 179212ti

Analysis started at: 8/25/2021 5:23:58 PM

User name: WINDOWS-UPCI4ER\Administrator

| Category | Concentration average | Concentration RSD |
|----------|-----------------------|-------------------|
| 9Be      | 0.084 ppb             |                   |
| 11B      | 4.736 ppb             |                   |
| 24Mg     | 2,110.205 ppb         |                   |
| 27Al     | 2,739.727 ppb         |                   |
| 40Ca     | -517.413 ppb          |                   |
| 51V      | 5.949 ppb             |                   |
| 52Cr     | 6.127 ppb             |                   |
| 55Mn     | 68.520 ppb            |                   |
| 56Fe     | 3,186.451 ppb         |                   |
| 58Ni     | 29.947 ppb            |                   |
| 59Co     | 1.425 ppb             |                   |
| 63Cu     | 14.383 ppb            |                   |
| 64Zn     | 192.975 ppb           |                   |
| 69Ga     | 1.711 ppb             |                   |
| 75As     | 1.407 ppb             |                   |
| 80Se     | 39.068 ppb            |                   |
| 85Rb     | 4.986 ppb             |                   |
| 88Sr     | 32.878 ppb            |                   |
| 107Ag    | 0.027 ppb             |                   |
| 114Cd    | 0.063 ppb             |                   |
| 133Cs    | 0.473 ppb             |                   |
| 138Ba    | 18.354 ppb            |                   |
| 139La    | 2.209 ppb             |                   |
| 140Ce    | 4.002 ppb             |                   |
| 141Pr    | 0.495 ppb             |                   |
| 142Nd    | 2.437 ppb             |                   |
| 152Sm    | 0.374 ppb             |                   |
| 153Eu    | 0.076 ppb             |                   |
| 158Gd    | 0.373 ppb             |                   |
| 164Dy    | 0.243 ppb             |                   |
| 165Ho    | 0.044 ppb             |                   |
| 166Er    | 0.119 ppb             |                   |
| 169Tm    | 0.016 ppb             |                   |
| 174Yb    | 0.095 ppb             |                   |
| 175Lu    | 0.014 ppb             |                   |
| 205Tl    | 0.031 ppb             |                   |
| 208Pb    | 2.061 ppb             |                   |
| 232Th    | 0.671 ppb             |                   |
| 238U     | 0.143 ppb             |                   |

| Category | Concentration average | Intensity average | Intensity RSD |
|----------|-----------------------|-------------------|---------------|
| 9Be      | 0.084 ppb             | 1,617 cps         |               |
| 11B      | 4.736 ppb             | 185,962 cps       |               |
| 24Mg     | 2,110.205 ppb         | 155,101,486 cps   |               |
| 27Al     | 2,739.727 ppb         | 262,053,765 cps   |               |
| 40Ca     | -517.413 ppb          | 7,404,991,345 cps |               |
| 51V      | 5.949 ppb             | 624,599 cps       |               |
| 52Cr     | 6.127 ppb             | 624,793 cps       |               |
| 55Mn     | 68.520 ppb            | 11,328,320 cps    |               |
| 56Fe     | 3,186.451 ppb         | 414,854,195 cps   |               |

| Category | Concentration average | Intensity average | Intensity RSD |
|----------|-----------------------|-------------------|---------------|
| 58Ni     | 29.947 ppb            | 1,612,613 cps     |               |
| 59Co     | 1.425 ppb             | 158,319 cps       |               |
| 63Cu     | 14.383 ppb            | 743,641 cps       |               |
| 64Zn     | 192.975 ppb           | 5,517,065 cps     |               |
| 69Ga     | 1.711 ppb             | 216,921 cps       |               |
| 75As     | 1.407 ppb             | 21,001 cps        |               |
| 80Se     | 39.068 ppb            | 10,405,054 cps    |               |
| 85Rb     | 4.986 ppb             | 696,891 cps       |               |
| 88Sr     | 32.878 ppb            | 6,426,600 cps     |               |
| 107Ag    | 0.027 ppb             | 5,174 cps         |               |
| 114Cd    | 0.063 ppb             | 4,487 cps         |               |
| 133Cs    | 0.473 ppb             | 109,075 cps       |               |
| 138Ba    | 18.354 ppb            | 3,828,889 cps     |               |
| 139La    | 2.209 ppb             | 556,318 cps       |               |
| 140Ce    | 4.002 ppb             | 1,029,775 cps     |               |
| 141Pr    | 0.495 ppb             | 171,031 cps       |               |
| 142Nd    | 2.437 ppb             | 316,884 cps       |               |
| 152Sm    | 0.374 ppb             | 38,734 cps        |               |
| 153Eu    | 0.076 ppb             | 14,999 cps        |               |
| 158Gd    | 0.373 ppb             | 32,974 cps        |               |
| 164Dy    | 0.243 ppb             | 28,787 cps        |               |
| 165Ho    | 0.044 ppb             | 17,582 cps        |               |
| 166Er    | 0.119 ppb             | 18,163 cps        |               |
| 169Tm    | 0.016 ppb             | 6,602 cps         |               |
| 174Yb    | 0.095 ppb             | 13,220 cps        |               |
| 175Lu    | 0.014 ppb             | 5,841 cps         |               |
| 205Tl    | 0.031 ppb             | 6,678 cps         |               |
| 208Pb    | 2.061 ppb             | 333,649 cps       |               |
| 232Th    | 0.671 ppb             | 209,448 cps       |               |
| 238U     | 0.143 ppb             | 48,026 cps        |               |

## Sample Summary

Instrument ID: iCAP Q

Analysis index: 22

Analysis name: 15028jian

Analysis started at: 8/25/2021 5:25:45 PM

User name: WINDOWS-UPCI4ER\Administrator

| Category | Concentration average | Concentration RSD |
|----------|-----------------------|-------------------|
| 9Be      | 0.013 ppb             |                   |
| 11B      | 0.919 ppb             |                   |
| 24Mg     | 567.955 ppb           |                   |
| 27Al     | 419.465 ppb           |                   |
| 40Ca     | -375.888 ppb          |                   |
| 51V      | 1.418 ppb             |                   |
| 52Cr     | 2.174 ppb             |                   |
| 55Mn     | 15.171 ppb            |                   |
| 56Fe     | 447.007 ppb           |                   |
| 58Ni     | 4.573 ppb             |                   |
| 59Co     | 0.227 ppb             |                   |
| 63Cu     | 16.974 ppb            |                   |
| 64Zn     | 186.302 ppb           |                   |
| 69Ga     | 0.459 ppb             |                   |
| 75As     | 0.688 ppb             |                   |
| 80Se     | 48.521 ppb            |                   |
| 85Rb     | 3.051 ppb             |                   |
| 88Sr     | 7.934 ppb             |                   |
| 107Ag    | 0.074 ppb             |                   |
| 114Cd    | 0.085 ppb             |                   |
| 133Cs    | 0.076 ppb             |                   |
| 138Ba    | 6.210 ppb             |                   |
| 139La    | 0.423 ppb             |                   |
| 140Ce    | 0.801 ppb             |                   |
| 141Pr    | 0.095 ppb             |                   |
| 142Nd    | 0.479 ppb             |                   |
| 152Sm    | 0.068 ppb             |                   |
| 153Eu    | 0.012 ppb             |                   |
| 158Gd    | 0.067 ppb             |                   |
| 164Dy    | 0.043 ppb             |                   |
| 165Ho    | 0.007 ppb             |                   |
| 166Er    | 0.008 ppb             |                   |
| 169Tm    | 0.003 ppb             |                   |
| 174Yb    | 0.016 ppb             |                   |
| 175Lu    | 0.002 ppb             |                   |
| 205Tl    | 0.007 ppb             |                   |
| 208Pb    | 1.370 ppb             |                   |
| 232Th    | 0.150 ppb             |                   |
| 238U     | 0.025 ppb             |                   |

| Category | Concentration average | Intensity average | Intensity RSD |
|----------|-----------------------|-------------------|---------------|
| 9Be      | 0.013 ppb             | 270 cps           |               |
| 11B      | 0.919 ppb             | 81,341 cps        |               |
| 24Mg     | 567.955 ppb           | 41,863,714 cps    |               |
| 27Al     | 419.465 ppb           | 40,265,746 cps    |               |
| 40Ca     | -375.888 ppb          | 7,167,135,772 cps |               |
| 51V      | 1.418 ppb             | 162,035 cps       |               |
| 52Cr     | 2.174 ppb             | 260,219 cps       |               |
| 55Mn     | 15.171 ppb            | 2,579,226 cps     |               |
| 56Fe     | 447.007 ppb           | 65,193,637 cps    |               |

| Category | Concentration average | Intensity average | Intensity RSD |
|----------|-----------------------|-------------------|---------------|
| 58Ni     | 4.573 ppb             | 269,064 cps       |               |
| 59Co     | 0.227 ppb             | 29,358 cps        |               |
| 63Cu     | 16.974 ppb            | 875,774 cps       |               |
| 64Zn     | 186.302 ppb           | 5,327,541 cps     |               |
| 69Ga     | 0.459 ppb             | 73,767 cps        |               |
| 75As     | 0.688 ppb             | 11,098 cps        |               |
| 80Se     | 48.521 ppb            | 10,453,000 cps    |               |
| 85Rb     | 3.051 ppb             | 428,579 cps       |               |
| 88Sr     | 7.934 ppb             | 1,574,526 cps     |               |
| 107Ag    | 0.074 ppb             | 9,464 cps         |               |
| 114Cd    | 0.085 ppb             | 5,598 cps         |               |
| 133Cs    | 0.076 ppb             | 17,729 cps        |               |
| 138Ba    | 6.210 ppb             | 1,408,452 cps     |               |
| 139La    | 0.423 ppb             | 106,735 cps       |               |
| 140Ce    | 0.801 ppb             | 206,793 cps       |               |
| 141Pr    | 0.095 ppb             | 32,786 cps        |               |
| 142Nd    | 0.479 ppb             | 62,517 cps        |               |
| 152Sm    | 0.068 ppb             | 7,062 cps         |               |
| 153Eu    | 0.012 ppb             | 2,394 cps         |               |
| 158Gd    | 0.067 ppb             | 5,891 cps         |               |
| 164Dy    | 0.043 ppb             | 5,208 cps         |               |
| 165Ho    | 0.007 ppb             | 2,880 cps         |               |
| 166Er    | 0.008 ppb             | 3,647 cps         |               |
| 169Tm    | 0.003 ppb             | 1,273 cps         |               |
| 174Yb    | 0.016 ppb             | 2,177 cps         |               |
| 175Lu    | 0.002 ppb             | 933 cps           |               |
| 205Tl    | 0.007 ppb             | 1,567 cps         |               |
| 208Pb    | 1.370 ppb             | 224,468 cps       |               |
| 232Th    | 0.150 ppb             | 48,243 cps        |               |
| 238U     | 0.025 ppb             | 8,486 cps         |               |

## Sample Summary

Instrument ID: iCAP Q

Analysis index: 23

Analysis name: 15024jian

Analysis started at: 8/25/2021 5:27:36 PM

User name: WINDOWS-UPCI4ER\Administrator

| Category | Concentration average | Concentration RSD |
|----------|-----------------------|-------------------|
| 9Be      | 0.016 ppb             |                   |
| 11B      | 10.826 ppb            |                   |
| 24Mg     | 592.047 ppb           |                   |
| 27Al     | 481.039 ppb           |                   |
| 40Ca     | -349.184 ppb          |                   |
| 51V      | 1.554 ppb             |                   |
| 52Cr     | 2.398 ppb             |                   |
| 55Mn     | 16.647 ppb            |                   |
| 56Fe     | 448.478 ppb           |                   |
| 58Ni     | 4.840 ppb             |                   |
| 59Co     | 0.212 ppb             |                   |
| 63Cu     | 6.948 ppb             |                   |
| 64Zn     | 190.034 ppb           |                   |
| 69Ga     | 0.505 ppb             |                   |
| 75As     | 0.724 ppb             |                   |
| 80Se     | 38.547 ppb            |                   |
| 85Rb     | 2.390 ppb             |                   |
| 88Sr     | 8.801 ppb             |                   |
| 107Ag    | 0.037 ppb             |                   |
| 114Cd    | 0.076 ppb             |                   |
| 133Cs    | 0.085 ppb             |                   |
| 138Ba    | 7.236 ppb             |                   |
| 139La    | 0.388 ppb             |                   |
| 140Ce    | 0.673 ppb             |                   |
| 141Pr    | 0.081 ppb             |                   |
| 142Nd    | 0.395 ppb             |                   |
| 152Sm    | 0.063 ppb             |                   |
| 153Eu    | 0.013 ppb             |                   |
| 158Gd    | 0.065 ppb             |                   |
| 164Dy    | 0.042 ppb             |                   |
| 165Ho    | 0.008 ppb             |                   |
| 166Er    | 0.002 ppb             |                   |
| 169Tm    | 0.003 ppb             |                   |
| 174Yb    | 0.018 ppb             |                   |
| 175Lu    | 0.002 ppb             |                   |
| 205Tl    | 0.009 ppb             |                   |
| 208Pb    | 0.856 ppb             |                   |
| 232Th    | 0.101 ppb             |                   |
| 238U     | 0.024 ppb             |                   |

| Category | Concentration average | Intensity average | Intensity RSD |
|----------|-----------------------|-------------------|---------------|
| 9Be      | 0.016 ppb             | 313 cps           |               |
| 11B      | 10.826 ppb            | 352,889 cps       |               |
| 24Mg     | 592.047 ppb           | 43,632,637 cps    |               |
| 27Al     | 481.039 ppb           | 46,151,436 cps    |               |
| 40Ca     | -349.184 ppb          | 7,122,255,985 cps |               |
| 51V      | 1.554 ppb             | 175,915 cps       |               |
| 52Cr     | 2.398 ppb             | 280,932 cps       |               |
| 55Mn     | 16.647 ppb            | 2,821,241 cps     |               |
| 56Fe     | 448.478 ppb           | 65,381,359 cps    |               |

| Category | Concentration average | Intensity average | Intensity RSD |
|----------|-----------------------|-------------------|---------------|
| 58Ni     | 4.840 ppb             | 283,211 cps       |               |
| 59Co     | 0.212 ppb             | 27,751 cps        |               |
| 63Cu     | 6.948 ppb             | 364,555 cps       |               |
| 64Zn     | 190.034 ppb           | 5,433,545 cps     |               |
| 69Ga     | 0.505 ppb             | 79,003 cps        |               |
| 75As     | 0.724 ppb             | 11,585 cps        |               |
| 80Se     | 38.547 ppb            | 10,402,411 cps    |               |
| 85Rb     | 2.390 ppb             | 336,869 cps       |               |
| 88Sr     | 8.801 ppb             | 1,743,172 cps     |               |
| 107Ag    | 0.037 ppb             | 6,031 cps         |               |
| 114Cd    | 0.076 ppb             | 5,178 cps         |               |
| 133Cs    | 0.085 ppb             | 19,993 cps        |               |
| 138Ba    | 7.236 ppb             | 1,612,939 cps     |               |
| 139La    | 0.388 ppb             | 97,882 cps        |               |
| 140Ce    | 0.673 ppb             | 173,891 cps       |               |
| 141Pr    | 0.081 ppb             | 27,951 cps        |               |
| 142Nd    | 0.395 ppb             | 51,497 cps        |               |
| 152Sm    | 0.063 ppb             | 6,512 cps         |               |
| 153Eu    | 0.013 ppb             | 2,680 cps         |               |
| 158Gd    | 0.065 ppb             | 5,788 cps         |               |
| 164Dy    | 0.042 ppb             | 5,131 cps         |               |
| 165Ho    | 0.008 ppb             | 3,327 cps         |               |
| 166Er    | 0.002 ppb             | 2,870 cps         |               |
| 169Tm    | 0.003 ppb             | 1,343 cps         |               |
| 174Yb    | 0.018 ppb             | 2,457 cps         |               |
| 175Lu    | 0.002 ppb             | 917 cps           |               |
| 205Tl    | 0.009 ppb             | 1,873 cps         |               |
| 208Pb    | 0.856 ppb             | 143,111 cps       |               |
| 232Th    | 0.101 ppb             | 33,031 cps        |               |
| 238U     | 0.024 ppb             | 8,076 cps         |               |
