# Supplementary material for: Geographic and breed-specific traceability of cashmere via mineral element profiling in Inner Mongolia (Ordos, Chifeng, and Alxa League)
Source: Royal Society of Chemistry journal article supplement (doi:10.1039/d5ra08122j), 2026-01-01
Supplement: d5ra08122j1.zip [file 20210826-a you qi5+chi feng15.pdf › ԭʼ޿/20210826-a you qi5+chi feng15.pdf]

## Instrument Summary:

Instrument ID: iCAP Q  
Serial Number: Undefined

## Labbook Summary:

Path and filename: \_Application Data\Workspace\LabBooks\wlw\20210826-1.imexp  
Labbook created by: Administrator  
Based on template:  
Hardware configuration: iCAPQ1  
Labbook type: eQuant  
Qtegra version (last saved): 2.7.2425.154  
Labbook started: 8/26/2021 5:02:31 PM  
Labbook finished: 8/26/2021 5:50:36 PM

## Method Summary:

| Isotope     | Mode | Dwell time (s) | # of Channels | Spacing | Resolution | IS |
|-------------|------|----------------|---------------|---------|------------|----|
| 9Be (KED)   | KED  | 0.03           | 3             | 0.1     | Normal     |    |
| 11B (KED)   | KED  | 0.03           | 3             | 0.1     | Normal     |    |
| 23Na (KED)  | KED  | 0.03           | 3             | 0.1     | Normal     |    |
| 24Mg (KED)  | KED  | 0.03           | 3             | 0.1     | Normal     |    |
| 27Al (KED)  | KED  | 0.03           | 3             | 0.1     | Normal     |    |
| 39K (KED)   | KED  | 0.03           | 3             | 0.1     | Normal     |    |
| 40Ca (KED)  | KED  | 0.03           | 3             | 0.1     | Normal     |    |
| 51V (KED)   | KED  | 0.03           | 3             | 0.1     | Normal     |    |
| 52Cr (KED)  | KED  | 0.03           | 3             | 0.1     | Normal     |    |
| 55Mn (KED)  | KED  | 0.03           | 3             | 0.1     | Normal     |    |
| 56Fe (KED)  | KED  | 0.03           | 3             | 0.1     | Normal     |    |
| 58Ni (KED)  | KED  | 0.03           | 3             | 0.1     | Normal     |    |
| 59Co (KED)  | KED  | 0.03           | 3             | 0.1     | Normal     |    |
| 63Cu (KED)  | KED  | 0.03           | 3             | 0.1     | Normal     |    |
| 64Zn (KED)  | KED  | 0.03           | 3             | 0.1     | Normal     |    |
| 69Ga (KED)  | KED  | 0.03           | 3             | 0.1     | Normal     |    |
| 75As (KED)  | KED  | 0.03           | 3             | 0.1     | Normal     |    |
| 80Se (KED)  | KED  | 0.03           | 3             | 0.1     | Normal     |    |
| 85Rb (KED)  | KED  | 0.03           | 3             | 0.1     | Normal     |    |
| 88Sr (KED)  | KED  | 0.03           | 3             | 0.1     | Normal     |    |
| 107Ag (KED) | KED  | 0.03           | 3             | 0.1     | Normal     |    |
| 114Cd (KED) | KED  | 0.03           | 3             | 0.1     | Normal     |    |
| 133Cs (KED) | KED  | 0.03           | 3             | 0.1     | Normal     |    |
| 138Ba (KED) | KED  | 0.03           | 3             | 0.1     | Normal     |    |
| 139La (KED) | KED  | 0.03           | 3             | 0.1     | Normal     |    |
| 140Ce (KED) | KED  | 0.03           | 3             | 0.1     | Normal     |    |
| 141Pr (KED) | KED  | 0.03           | 3             | 0.1     | Normal     |    |
| 142Nd (KED) | KED  | 0.03           | 3             | 0.1     | Normal     |    |
| 152Sm (KED) | KED  | 0.03           | 3             | 0.1     | Normal     |    |
| 153Eu (KED) | KED  | 0.03           | 3             | 0.1     | Normal     |    |
| 158Gd (KED) | KED  | 0.03           | 3             | 0.1     | Normal     |    |
| 164Dy (KED) | KED  | 0.03           | 3             | 0.1     | Normal     |    |
| 165Ho (KED) | KED  | 0.03           | 3             | 0.1     | Normal     |    |
| 166Er (KED) | KED  | 0.03           | 3             | 0.1     | Normal     |    |
| 169Tm (KED) | KED  | 0.03           | 3             | 0.1     | Normal     |    |
| 174Yb (KED) | KED  | 0.03           | 3             | 0.1     | Normal     |    |
| 175Lu (KED) | KED  | 0.03           | 3             | 0.1     | Normal     |    |
| 205Tl (KED) | KED  | 0.03           | 3             | 0.1     | Normal     |    |
| 208Pb (KED) | KED  | 0.03           | 3             | 0.1     | Normal     |    |
| 232Th (KED) | KED  | 0.03           | 3             | 0.1     | Normal     |    |
| 238U (KED)  | KED  | 0.03           | 3             | 0.1     | Normal     |    |

| Isotope    | Mode | Dwell time (s) | # of Channels | Spacing | Resolution |
|------------|------|----------------|---------------|---------|------------|
| 9Be (KED)  | KED  | 0.03           | 3             | 0.1     | Normal     |
| 11B (KED)  | KED  | 0.03           | 3             | 0.1     | Normal     |
| 23Na (KED) | KED  | 0.03           | 3             | 0.1     | Normal     |
| 24Mg (KED) | KED  | 0.03           | 3             | 0.1     | Normal     |
| 27Al (KED) | KED  | 0.03           | 3             | 0.1     | Normal     |
| 39K (KED)  | KED  | 0.03           | 3             | 0.1     | Normal     |
| 40Ca (KED) | KED  | 0.03           | 3             | 0.1     | Normal     |
| 51V (KED)  | KED  | 0.03           | 3             | 0.1     | Normal     |
| 52Cr (KED) | KED  | 0.03           | 3             | 0.1     | Normal     |
| 55Mn (KED) | KED  | 0.03           | 3             | 0.1     | Normal     |
| 56Fe (KED) | KED  | 0.03           | 3             | 0.1     | Normal     |
| 58Ni (KED) | KED  | 0.03           | 3             | 0.1     | Normal     |
| 59Co (KED) | KED  | 0.03           | 3             | 0.1     | Normal     |
| 63Cu (KED) | KED  | 0.03           | 3             | 0.1     | Normal     |

| Isotope     | Mode | Dwell time (s) | # of Channels | Spacing | Resolution |
|-------------|------|----------------|---------------|---------|------------|
| 64Zn (KED)  | KED  | 0.03           | 3             | 0.1     | Normal     |
| 69Ga (KED)  | KED  | 0.03           | 3             | 0.1     | Normal     |
| 75As (KED)  | KED  | 0.03           | 3             | 0.1     | Normal     |
| 80Se (KED)  | KED  | 0.03           | 3             | 0.1     | Normal     |
| 85Rb (KED)  | KED  | 0.03           | 3             | 0.1     | Normal     |
| 88Sr (KED)  | KED  | 0.03           | 3             | 0.1     | Normal     |
| 107Ag (KED) | KED  | 0.03           | 3             | 0.1     | Normal     |
| 114Cd (KED) | KED  | 0.03           | 3             | 0.1     | Normal     |
| 133Cs (KED) | KED  | 0.03           | 3             | 0.1     | Normal     |
| 138Ba (KED) | KED  | 0.03           | 3             | 0.1     | Normal     |
| 139La (KED) | KED  | 0.03           | 3             | 0.1     | Normal     |
| 140Ce (KED) | KED  | 0.03           | 3             | 0.1     | Normal     |
| 141Pr (KED) | KED  | 0.03           | 3             | 0.1     | Normal     |
| 142Nd (KED) | KED  | 0.03           | 3             | 0.1     | Normal     |
| 152Sm (KED) | KED  | 0.03           | 3             | 0.1     | Normal     |
| 153Eu (KED) | KED  | 0.03           | 3             | 0.1     | Normal     |
| 158Gd (KED) | KED  | 0.03           | 3             | 0.1     | Normal     |
| 164Dy (KED) | KED  | 0.03           | 3             | 0.1     | Normal     |
| 165Ho (KED) | KED  | 0.03           | 3             | 0.1     | Normal     |
| 166Er (KED) | KED  | 0.03           | 3             | 0.1     | Normal     |
| 169Tm (KED) | KED  | 0.03           | 3             | 0.1     | Normal     |
| 174Yb (KED) | KED  | 0.03           | 3             | 0.1     | Normal     |
| 175Lu (KED) | KED  | 0.03           | 3             | 0.1     | Normal     |
| 205Tl (KED) | KED  | 0.03           | 3             | 0.1     | Normal     |
| 208Pb (KED) | KED  | 0.03           | 3             | 0.1     | Normal     |
| 232Th (KED) | KED  | 0.03           | 3             | 0.1     | Normal     |
| 238U (KED)  | KED  | 0.03           | 3             | 0.1     | Normal     |

| No. of sweeps | Time per sweep[s] | Time per main run[s] |
|---------------|-------------------|----------------------|
| 10            | 3.69              | 36.9                 |

## Calibration Curves:

9Be (KED)

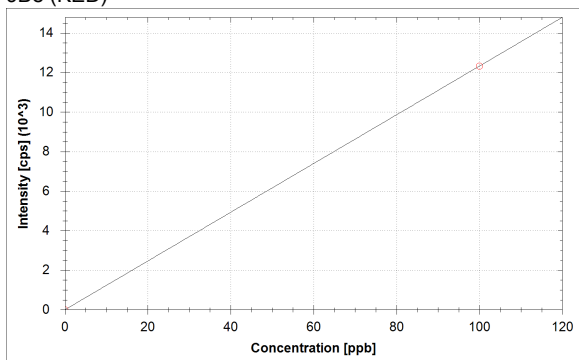

$$f(x) = 123.2608 \cdot x$$

$$R^2 = 1.0000$$

$$\text{BEC} = 0.000 \text{ ppb}$$

$$\text{LoD} = \text{N/A}$$

11B (KED)

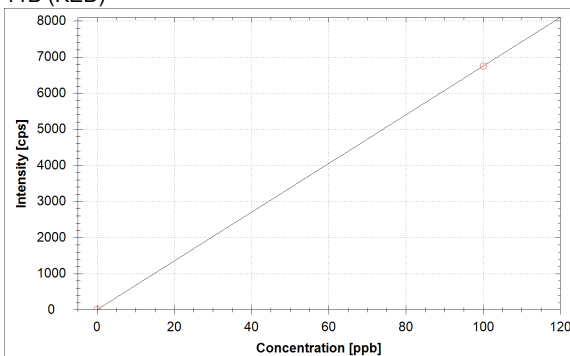

$$f(x) = 67.4516 \cdot x + 3.3333$$

$$R^2 = 1.0000$$

$$\text{BEC} = 0.049 \text{ ppb}$$

$$\text{LoD} = \text{N/A}$$

23Na (KED)

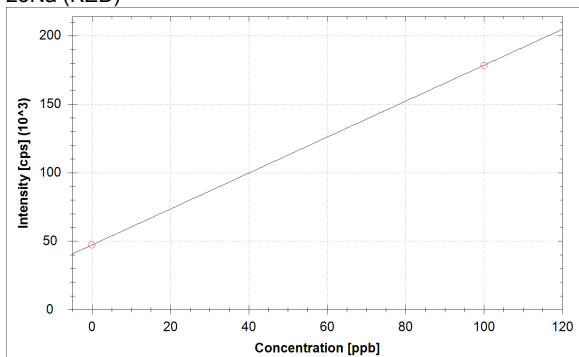

$$f(x) = 1312.1627 \cdot x + 47188.9875$$

$$R^2 = 1.0000$$

$$\text{BEC} = 35.963 \text{ ppb}$$

$$\text{LoD} = \text{N/A}$$

24Mg (KED)

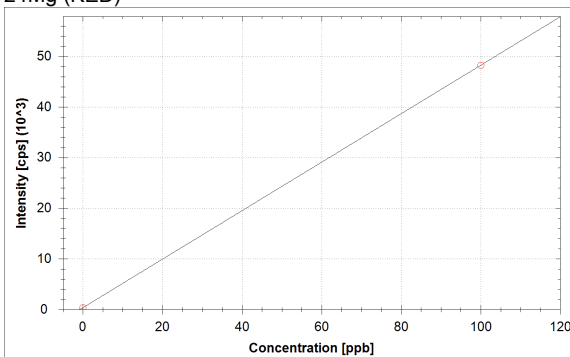

$$f(x) = 478.6649 \cdot x + 370.0058$$

$$R^2 = 1.0000$$

$$\text{BEC} = 0.773 \text{ ppb}$$

$$\text{LoD} = \text{N/A}$$

27Al (KED)

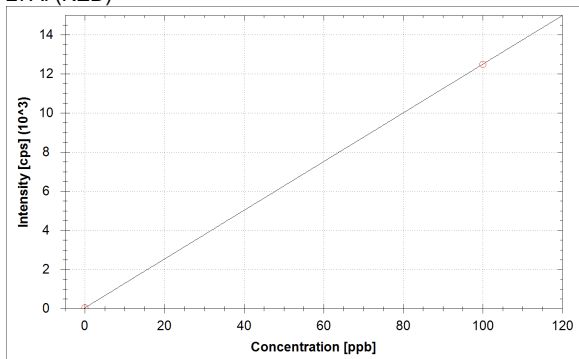

$$f(x) = 124.4962 \cdot x + 40.0001$$

$$R^2 = 1.0000$$

$$\text{BEC} = 0.321 \text{ ppb}$$

$$\text{LoD} = \text{N/A}$$

39K (KED)

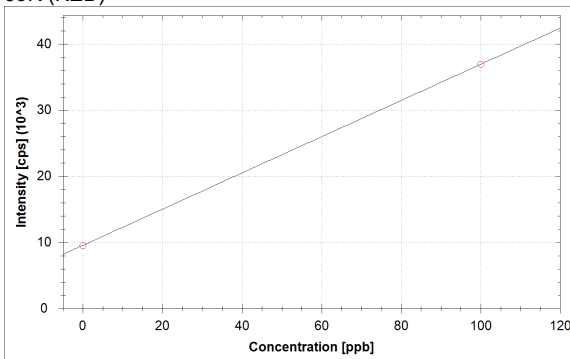

$$f(x) = 273.8758 \cdot x + 9553.6672$$

$$R^2 = 1.0000$$

$$\text{BEC} = 34.883 \text{ ppb}$$

$$\text{LoD} = \text{N/A}$$

40Ca (KED)

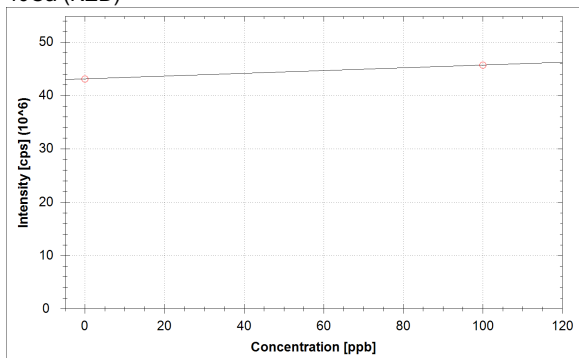

$$f(x) = 25880.6031 \cdot x + 43104725.9707$$

$$R^2 = 1.0000$$

$$\text{BEC} = 1665.522 \text{ ppb}$$

$$\text{LoD} = \text{N/A}$$

51V (KED)

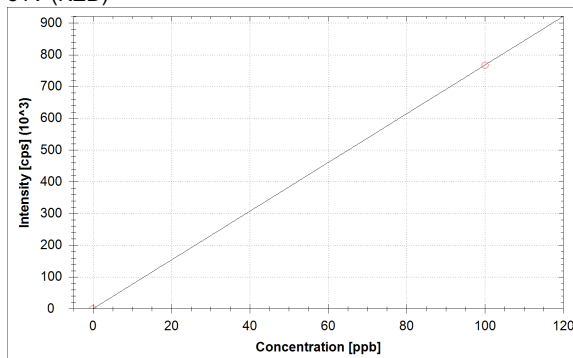

$$f(x) = 7674.7444 \cdot x + 13.3334$$

$$R^2 = 1.0000$$

$$\text{BEC} = 0.002 \text{ ppb}$$

$$\text{LoD} = \text{N/A}$$

52Cr (KED)

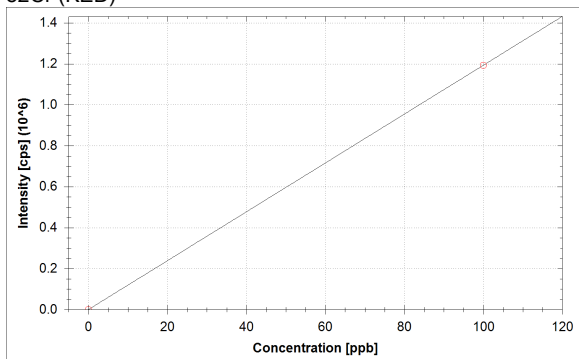

$$f(x) = 11931.2609 \cdot x + 96.6673$$

$$R^2 = 1.0000$$

$$\text{BEC} = 0.008 \text{ ppb}$$

$$\text{LoD} = \text{N/A}$$

55Mn (KED)

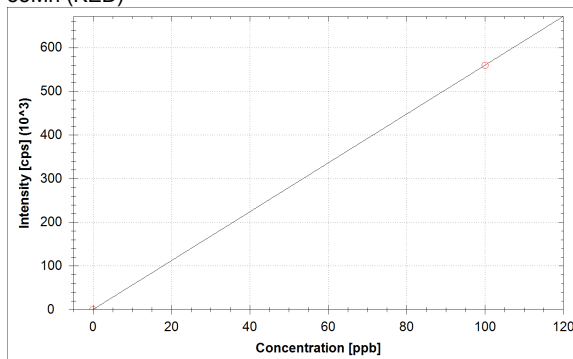

$$f(x) = 5595.6865 \cdot x + 113.3339$$

$$R^2 = 1.0000$$

$$\text{BEC} = 0.020 \text{ ppb}$$

$$\text{LoD} = \text{N/A}$$

56Fe (KED)

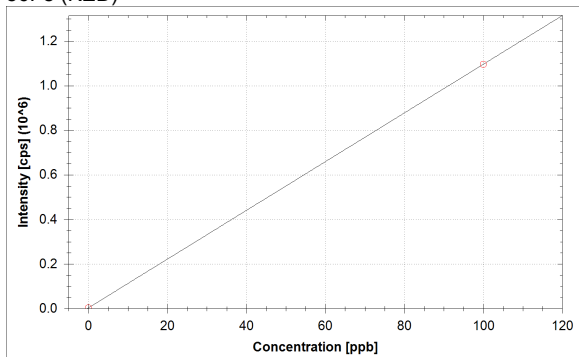

$$f(x) = 10929.8663 \cdot x + 3317.1118$$

$$R^2 = 1.0000$$

$$\text{BEC} = 0.303 \text{ ppb}$$

$$\text{LoD} = \text{N/A}$$

58Ni (KED)

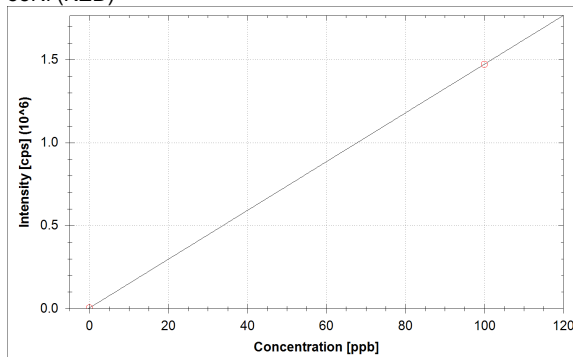

$$f(x) = 14684.9720 \cdot x + 3797.2523$$

$$R^2 = 1.0000$$

$$\text{BEC} = 0.259 \text{ ppb}$$

$$\text{LoD} = \text{N/A}$$

59Co (KED)

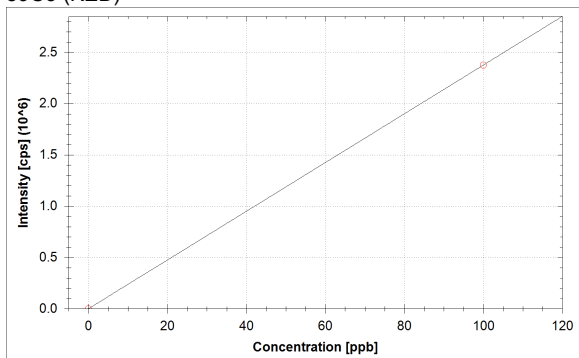

$$f(x) = 23751.0434 \cdot x + 16.6667$$

$$R^2 = 1.0000$$

$$\text{BEC} = 0.001 \text{ ppb}$$

$$\text{LoD} = \text{N/A}$$

63Cu (KED)

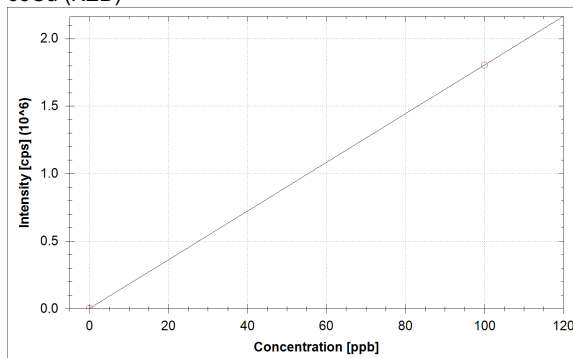

$$f(x) = 18017.4779 \cdot x + 1740.1254$$

$$R^2 = 1.0000$$

$$\text{BEC} = 0.097 \text{ ppb}$$

$$\text{LoD} = \text{N/A}$$

64Zn (KED)

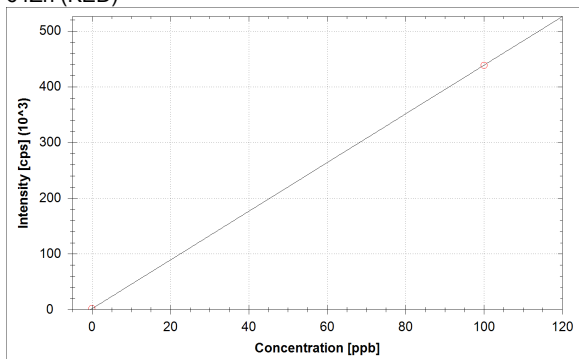

$$f(x) = 4369.6347 \cdot x + 1603.4373$$

$$R^2 = 1.0000$$

$$\text{BEC} = 0.367 \text{ ppb}$$

$$\text{LoD} = \text{N/A}$$

69Ga (KED)

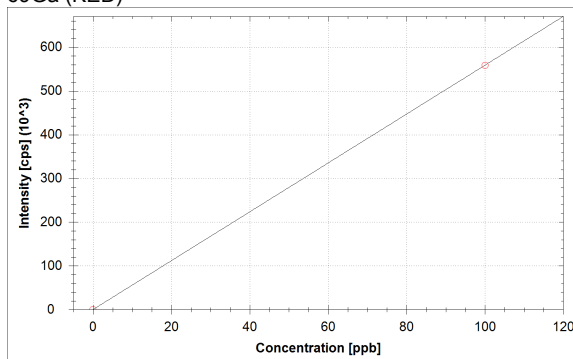

$$f(x) = 5586.0876 \cdot x + 80.0003$$

$$R^2 = 1.0000$$

$$\text{BEC} = 0.014 \text{ ppb}$$

$$\text{LoD} = \text{N/A}$$

75As (KED)

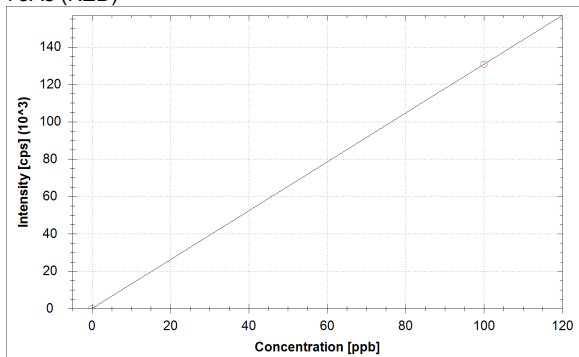

$$f(x) = 1307.3096 \cdot x + 23.3334$$

$$R^2 = 1.0000$$

$$\text{BEC} = 0.018 \text{ ppb}$$

$$\text{LoD} = \text{N/A}$$

80Se (KED)

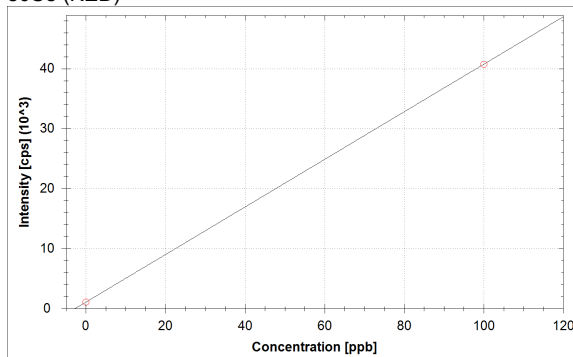

$$f(x) = 396.5637 \cdot x + 1066.7124$$

$$R^2 = 1.0000$$

$$\text{BEC} = 2.690 \text{ ppb}$$

$$\text{LoD} = \text{N/A}$$

85Rb (KED)

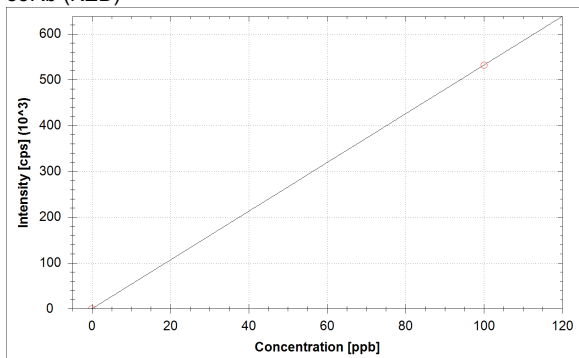

$$f(x) = 5318.1464 \cdot x + 96.6672$$

$$R^2 = 1.0000$$

$$\text{BEC} = 0.018 \text{ ppb}$$

$$\text{LoD} = \text{N/A}$$

88Sr (KED)

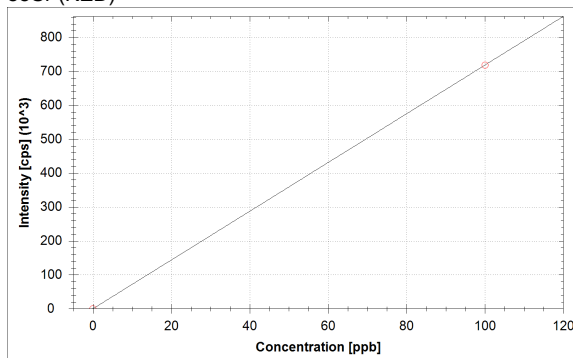

$$f(x) = 7182.1846 \cdot x + 156.6678$$

$$R^2 = 1.0000$$

$$\text{BEC} = 0.022 \text{ ppb}$$

$$\text{LoD} = \text{N/A}$$

107Ag (KED)

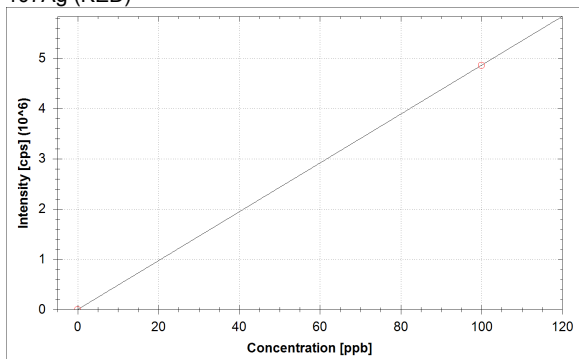

$$f(x) = 48623.8874 \cdot x + 86.6670$$

$$R^2 = 1.0000$$

$$\text{BEC} = 0.002 \text{ ppb}$$

$$\text{LoD} = \text{N/A}$$

114Cd (KED)

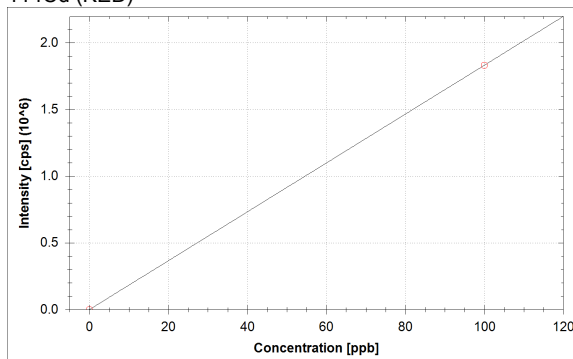

$$f(x) = 18313.9360 \cdot x + 13.3334$$

$$R^2 = 1.0000$$

$$\text{BEC} = 0.001 \text{ ppb}$$

$$\text{LoD} = \text{N/A}$$

133Cs (KED)

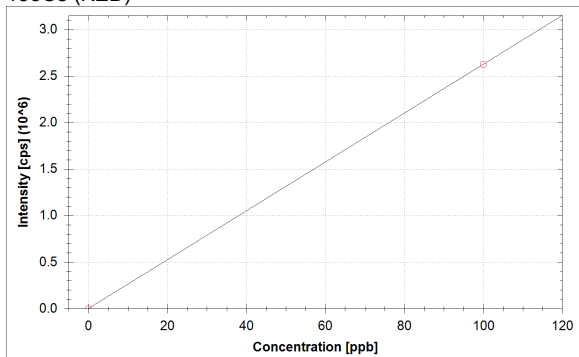

$$f(x) = 26260.7895 \cdot x + 46.6668$$

$$R^2 = 1.0000$$

$$\text{BEC} = 0.002 \text{ ppb}$$

$$\text{LoD} = \text{N/A}$$

138Ba (KED)

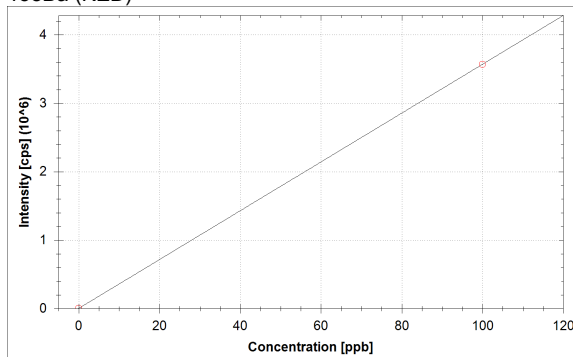

$$f(x) = 35685.6032 \cdot x + 1733.4544$$

$$R^2 = 1.0000$$

$$\text{BEC} = 0.049 \text{ ppb}$$

$$\text{LoD} = \text{N/A}$$

139La (KED)

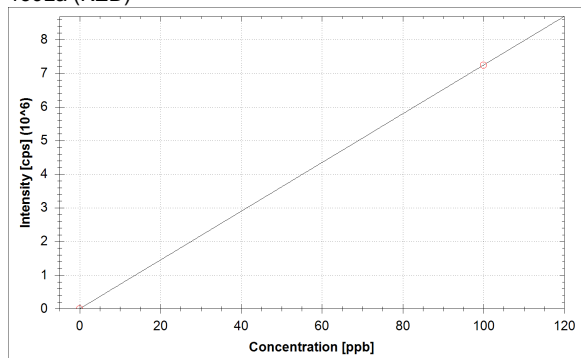

$$f(x) = 72429.1297 \cdot x + 16.6667$$

$$R^2 = 1.0000$$

$$\text{BEC} = 0.000 \text{ ppb}$$

$$\text{LoD} = \text{N/A}$$

140Ce (KED)

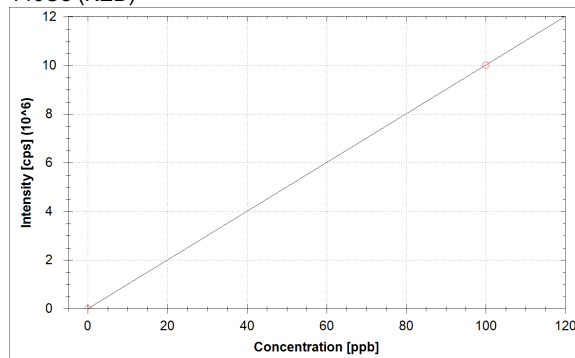

$$f(x) = 100173.4357 \cdot x + 96.6672$$

$$R^2 = 1.0000$$

$$\text{BEC} = 0.001 \text{ ppb}$$

$$\text{LoD} = \text{N/A}$$

141Pr (KED)

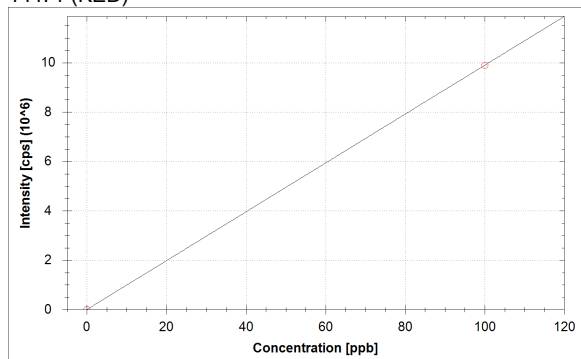

$$f(x) = 98983.5221 \cdot x + 3.3333$$

$$R^2 = 1.0000$$

$$\text{BEC} = 0.000 \text{ ppb}$$

$$\text{LoD} = \text{N/A}$$

142Nd (KED)

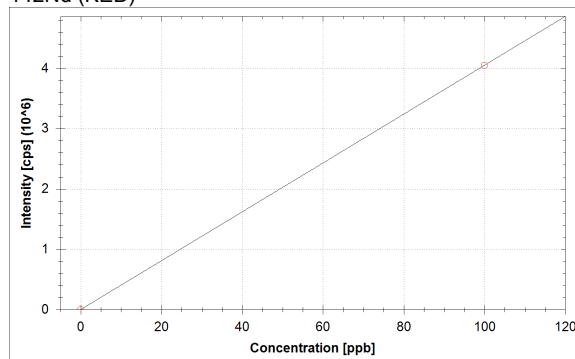

$$f(x) = 40507.3525 \cdot x + 13.3334$$

$$R^2 = 1.0000$$

$$\text{BEC} = 0.000 \text{ ppb}$$

$$\text{LoD} = \text{N/A}$$

152Sm (KED)

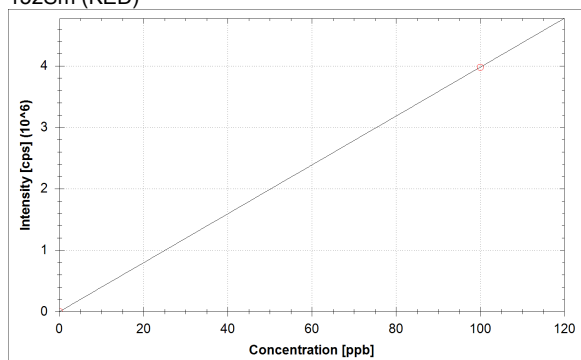

$$f(x) = 39773.5558 \cdot x$$

$$R^2 = 1.0000$$

$$\text{BEC} = 0.000 \text{ ppb}$$

$$\text{LoD} = \text{N/A}$$

153Eu (KED)

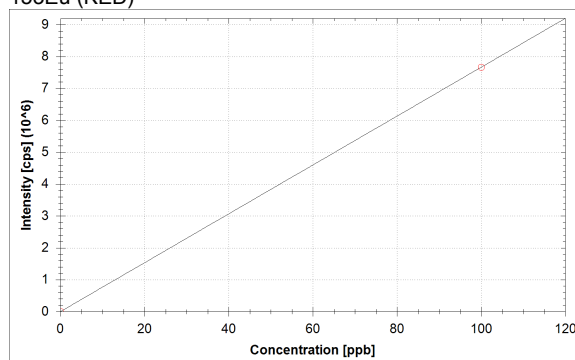

$$f(x) = 76632.2046 \cdot x$$

$$R^2 = 1.0000$$

$$\text{BEC} = 0.000 \text{ ppb}$$

$$\text{LoD} = \text{N/A}$$

158Gd (KED)

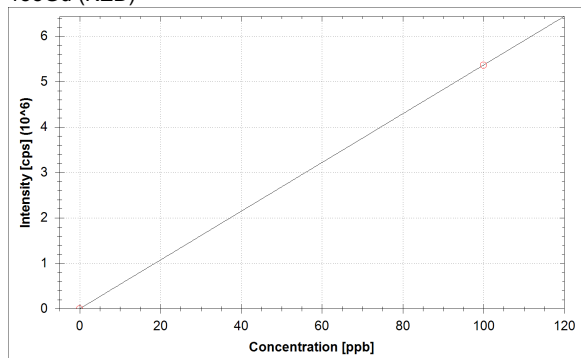

$$f(x) = 53646.1413 \cdot x + 3.3333$$

$$R^2 = 1.0000$$

$$\text{BEC} = 0.000 \text{ ppb}$$

$$\text{LoD} = \text{N/A}$$

164Dy (KED)

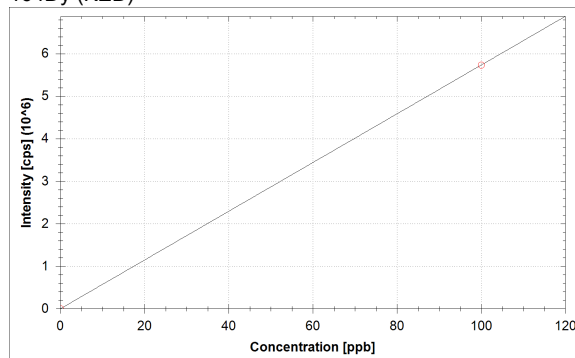

$$f(x) = 57322.5879 \cdot x$$

$$R^2 = 1.0000$$

$$\text{BEC} = 0.000 \text{ ppb}$$

$$\text{LoD} = \text{N/A}$$

165Ho (KED)

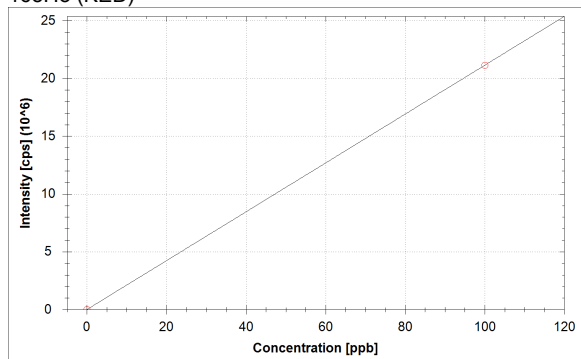

$$f(x) = 211372.0323 \cdot x + 10.0000$$

$$R^2 = 1.0000$$

$$\text{BEC} = 0.000 \text{ ppb}$$

$$\text{LoD} = \text{N/A}$$

166Er (KED)

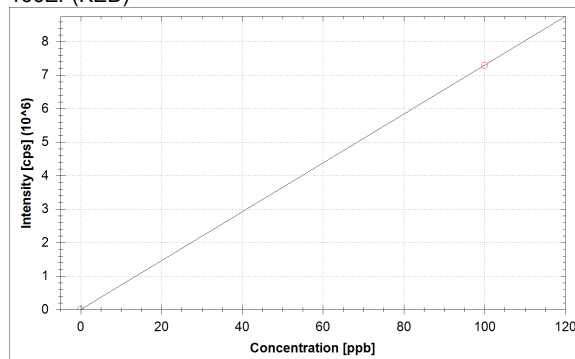

$$f(x) = 72960.0625 \cdot x + 16.6667$$

$$R^2 = 1.0000$$

$$\text{BEC} = 0.000 \text{ ppb}$$

$$\text{LoD} = \text{N/A}$$

169Tm (KED)

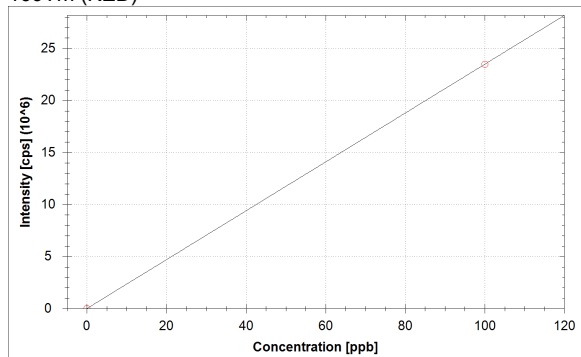

$$f(x) = 234714.3242 \cdot x + 3.3333$$

$$R^2 = 1.0000$$

$$\text{BEC} = 0.000 \text{ ppb}$$

$$\text{LoD} = \text{N/A}$$

174Yb (KED)

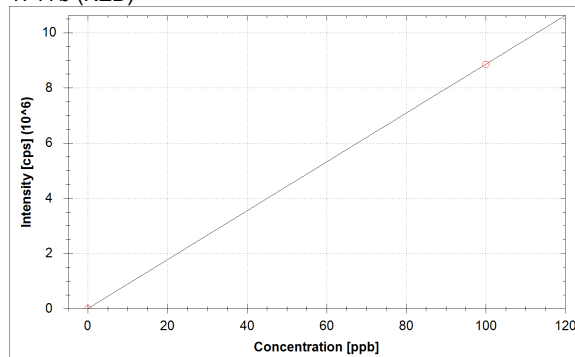

$$f(x) = 88521.3443 \cdot x + 3.3333$$

$$R^2 = 1.0000$$

$$\text{BEC} = 0.000 \text{ ppb}$$

$$\text{LoD} = \text{N/A}$$

175Lu (KED)

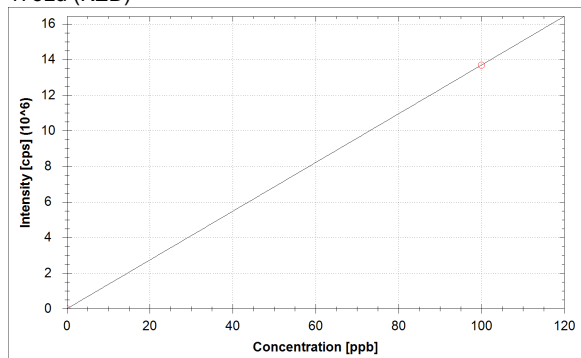

$$f(x) = 136877.6923 \cdot x$$

$$R^2 = 1.0000$$

$$\text{BEC} = 0.000 \text{ ppb}$$

$$\text{LoD} = \text{N/A}$$

205Tl (KED)

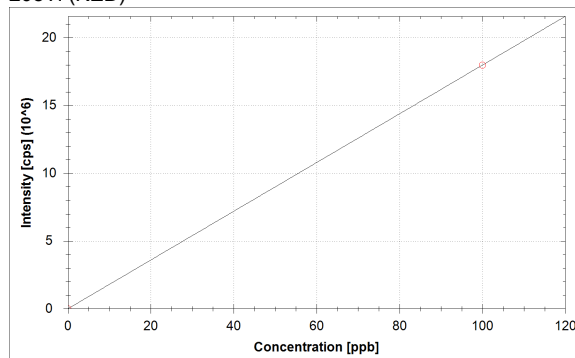

$$f(x) = 179803.8872 \cdot x$$

$$R^2 = 1.0000$$

$$\text{BEC} = 0.000 \text{ ppb}$$

$$\text{LoD} = \text{N/A}$$

208Pb (KED)

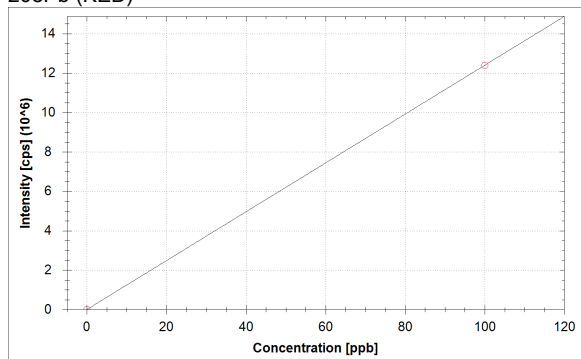

$$f(x) = 123941.9536 \cdot x + 3180.4081$$

$$R^2 = 1.0000$$

$$\text{BEC} = 0.026 \text{ ppb}$$

$$\text{LoD} = \text{N/A}$$

232Th (KED)

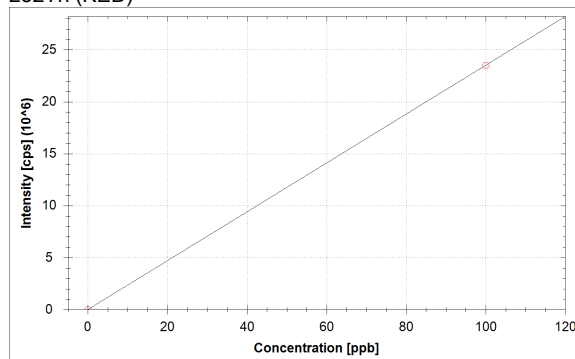

$$f(x) = 235140.1708 \cdot x + 523.3455$$

$$R^2 = 1.0000$$

$$\text{BEC} = 0.002 \text{ ppb}$$

$$\text{LoD} = \text{N/A}$$

238U (KED)

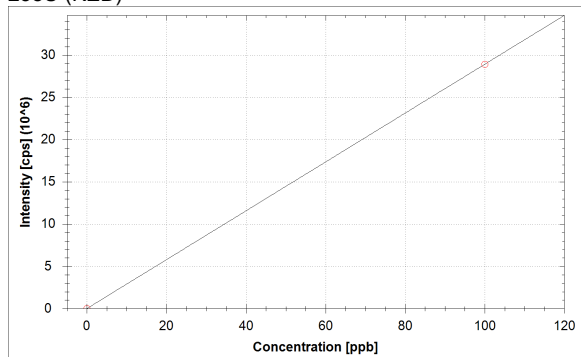

$$f(x) = 289131.3059 \cdot x + 100.0006$$

$$R^2 = 1.0000$$

$$\text{BEC} = 0.000 \text{ ppb}$$

$$\text{LoD} = \text{N/A}$$

**Standards:**

Analysis Index: 3  
 Analysis Name: std1  
 Analysis Type: STD  
 Analysis Started at: 8/26/2021 5:08:05 PM  
 Standard (Stock): std1  
 Standard DF: 1

| Category    | Concentration average | Concentration RSD | Standard Concentration |
|-------------|-----------------------|-------------------|------------------------|
| 9Be (KED)   | 100.000 ppb           |                   | 100.000 ppb            |
| 11B (KED)   | 100.000 ppb           |                   | 100.000 ppb            |
| 23Na (KED)  | 100.000 ppb           |                   | 100.000 ppb            |
| 24Mg (KED)  | 100.000 ppb           |                   | 100.000 ppb            |
| 27Al (KED)  | 100.000 ppb           |                   | 100.000 ppb            |
| 39K (KED)   | 100.000 ppb           |                   | 100.000 ppb            |
| 40Ca (KED)  | 100.000 ppb           |                   | 100.000 ppb            |
| 51V (KED)   | 100.000 ppb           |                   | 100.000 ppb            |
| 52Cr (KED)  | 100.000 ppb           |                   | 100.000 ppb            |
| 55Mn (KED)  | 100.000 ppb           |                   | 100.000 ppb            |
| 56Fe (KED)  | 100.000 ppb           |                   | 100.000 ppb            |
| 58Ni (KED)  | 100.000 ppb           |                   | 100.000 ppb            |
| 59Co (KED)  | 100.000 ppb           |                   | 100.000 ppb            |
| 63Cu (KED)  | 100.000 ppb           |                   | 100.000 ppb            |
| 64Zn (KED)  | 100.000 ppb           |                   | 100.000 ppb            |
| 69Ga (KED)  | 100.000 ppb           |                   | 100.000 ppb            |
| 75As (KED)  | 100.000 ppb           |                   | 100.000 ppb            |
| 80Se (KED)  | 100.000 ppb           |                   | 100.000 ppb            |
| 85Rb (KED)  | 100.000 ppb           |                   | 100.000 ppb            |
| 88Sr (KED)  | 100.000 ppb           |                   | 100.000 ppb            |
| 107Ag (KED) | 100.000 ppb           |                   | 100.000 ppb            |
| 114Cd (KED) | 100.000 ppb           |                   | 100.000 ppb            |
| 133Cs (KED) | 100.000 ppb           |                   | 100.000 ppb            |
| 138Ba (KED) | 100.000 ppb           |                   | 100.000 ppb            |
| 139La (KED) | 100.000 ppb           |                   | 100.000 ppb            |
| 140Ce (KED) | 100.000 ppb           |                   | 100.000 ppb            |
| 141Pr (KED) | 100.000 ppb           |                   | 100.000 ppb            |
| 142Nd (KED) | 100.000 ppb           |                   | 100.000 ppb            |
| 152Sm (KED) | 100.000 ppb           |                   | 100.000 ppb            |
| 153Eu (KED) | 100.000 ppb           |                   | 100.000 ppb            |
| 158Gd (KED) | 100.000 ppb           |                   | 100.000 ppb            |
| 164Dy (KED) | 100.000 ppb           |                   | 100.000 ppb            |
| 165Ho (KED) | 100.000 ppb           |                   | 100.000 ppb            |
| 166Er (KED) | 100.000 ppb           |                   | 100.000 ppb            |
| 169Tm (KED) | 100.000 ppb           |                   | 100.000 ppb            |
| 174Yb (KED) | 100.000 ppb           |                   | 100.000 ppb            |
| 175Lu (KED) | 100.000 ppb           |                   | 100.000 ppb            |
| 205Tl (KED) | 100.000 ppb           |                   | 100.000 ppb            |
| 208Pb (KED) | 100.000 ppb           |                   | 100.000 ppb            |
| 232Th (KED) | 100.000 ppb           |                   | 100.000 ppb            |
| 238U (KED)  | 100.000 ppb           |                   | 100.000 ppb            |

## Sample List Summary:

Instrument ID: iCAP Q

| Index: | Label:      | Main<br>Runs: | Survey<br>Runs: | Start Time:          | User name:                    |
|--------|-------------|---------------|-----------------|----------------------|-------------------------------|
| 1      | water       | 3             | 0               | 8/26/2021 5:02:34 PM | WINDOWS-UPCI4ER\Administrator |
| 2      | blk         | 1             | 0               | 8/26/2021 5:05:44 PM | WINDOWS-UPCI4ER\Administrator |
| 3      | std1        | 1             | 0               | 8/26/2021 5:08:05 PM | WINDOWS-UPCI4ER\Administrator |
| 4      | 179407jian  | 1             | 0               | 8/26/2021 5:09:57 PM | WINDOWS-UPCI4ER\Administrator |
| 5      | 051920jian  | 1             | 0               | 8/26/2021 5:12:08 PM | WINDOWS-UPCI4ER\Administrator |
| 6      | 179466jian  | 1             | 0               | 8/26/2021 5:14:10 PM | WINDOWS-UPCI4ER\Administrator |
| 7      | 179422jian  | 1             | 0               | 8/26/2021 5:16:03 PM | WINDOWS-UPCI4ER\Administrator |
| 8      | 046281jian  | 1             | 0               | 8/26/2021 5:17:59 PM | WINDOWS-UPCI4ER\Administrator |
| 9      | 1602126jian | 1             | 0               | 8/26/2021 5:19:56 PM | WINDOWS-UPCI4ER\Administrator |
| 10     | 1602611jian | 1             | 0               | 8/26/2021 5:21:52 PM | WINDOWS-UPCI4ER\Administrator |
| 11     | 1601422jian | 1             | 0               | 8/26/2021 5:23:53 PM | WINDOWS-UPCI4ER\Administrator |
| 12     | 1601242jian | 1             | 0               | 8/26/2021 5:25:59 PM | WINDOWS-UPCI4ER\Administrator |
| 13     | 1602168jian | 1             | 0               | 8/26/2021 5:28:04 PM | WINDOWS-UPCI4ER\Administrator |
| 14     | 1602088jian | 1             | 0               | 8/26/2021 5:30:04 PM | WINDOWS-UPCI4ER\Administrator |
| 15     | 1603041jian | 1             | 0               | 8/26/2021 5:32:03 PM | WINDOWS-UPCI4ER\Administrator |
| 16     | 1602166jian | 1             | 0               | 8/26/2021 5:34:06 PM | WINDOWS-UPCI4ER\Administrator |
| 17     | 1602152jian | 1             | 0               | 8/26/2021 5:36:12 PM | WINDOWS-UPCI4ER\Administrator |
| 18     | 1602201jian | 1             | 0               | 8/26/2021 5:38:13 PM | WINDOWS-UPCI4ER\Administrator |
| 19     | 1602639jian | 1             | 0               | 8/26/2021 5:40:10 PM | WINDOWS-UPCI4ER\Administrator |
| 20     | 16014jian   | 1             | 0               | 8/26/2021 5:42:14 PM | WINDOWS-UPCI4ER\Administrator |
| 21     | 16001jian   | 1             | 0               | 8/26/2021 5:44:17 PM | WINDOWS-UPCI4ER\Administrator |
| 22     | 1702121jian | 1             | 0               | 8/26/2021 5:46:28 PM | WINDOWS-UPCI4ER\Administrator |
| 23     | 1701274jian | 1             | 0               | 8/26/2021 5:48:31 PM | WINDOWS-UPCI4ER\Administrator |

## Sample Summary

Instrument ID: iCAP Q

Analysis index: 1

Analysis name: water

Analysis started at: 8/26/2021 5:02:34 PM

User name: WINDOWS-UPCI4ER\Administrator

| Category    | Concentration average | Concentration RSD |
|-------------|-----------------------|-------------------|
| 9Be (KED)   | 0.000 ppb             |                   |
| 11B (KED)   | 0.066 ppb             | 173.2 %           |
| 23Na (KED)  | -27.917 ppb           | 0.8 %             |
| 24Mg (KED)  | -0.682 ppb            | 2.0 %             |
| 27Al (KED)  | -0.295 ppb            | 0.0 %             |
| 39K (KED)   | -20.182 ppb           | 0.5 %             |
| 40Ca (KED)  | 309.246 ppb           | 23.1 %            |
| 51V (KED)   | -0.001 ppb            | 173.2 %           |
| 52Cr (KED)  | -0.006 ppb            | 11.4 %            |
| 55Mn (KED)  | -0.013 ppb            | 18.2 %            |
| 56Fe (KED)  | -0.265 ppb            | 1.3 %             |
| 58Ni (KED)  | -0.099 ppb            | 6.1 %             |
| 59Co (KED)  | -0.001 ppb            | 13.3 %            |
| 63Cu (KED)  | -0.088 ppb            | 2.4 %             |
| 64Zn (KED)  | -0.268 ppb            | 1.9 %             |
| 69Ga (KED)  | -0.011 ppb            | 13.5 %            |
| 75As (KED)  | -0.014 ppb            | 10.8 %            |
| 80Se (KED)  | -0.165 ppb            | 38.8 %            |
| 85Rb (KED)  | -0.017 ppb            | 5.7 %             |
| 88Sr (KED)  | -0.019 ppb            | 5.0 %             |
| 107Ag (KED) | -0.002 ppb            | 0.0 %             |
| 114Cd (KED) | 0.000 ppb             | 21.7 %            |
| 133Cs (KED) | -0.002 ppb            | 22.0 %            |
| 138Ba (KED) | -0.044 ppb            | 1.1 %             |
| 139La (KED) | 0.000 ppb             | 12.4 %            |
| 140Ce (KED) | -0.001 ppb            | 0.0 %             |
| 141Pr (KED) | 0.000 ppb             | 173.2 %           |
| 142Nd (KED) | 0.000 ppb             | 0.0 %             |
| 152Sm (KED) | 0.000 ppb             |                   |
| 153Eu (KED) | 0.000 ppb             |                   |
| 158Gd (KED) | 0.000 ppb             | 0.0 %             |
| 164Dy (KED) | 0.000 ppb             |                   |
| 165Ho (KED) | 0.000 ppb             |                   |
| 166Er (KED) | 0.000 ppb             | 12.4 %            |
| 169Tm (KED) | 0.000 ppb             | 0.0 %             |
| 174Yb (KED) | 0.000 ppb             | 0.0 %             |
| 175Lu (KED) | 0.000 ppb             |                   |
| 205Tl (KED) | 0.000 ppb             | 114.6 %           |
| 208Pb (KED) | -0.025 ppb            | 0.4 %             |
| 232Th (KED) | -0.002 ppb            | 0.0 %             |
| 238U (KED)  | 0.000 ppb             | 1.9 %             |

| Category   | Concentration average | Intensity average | Intensity RSD |
|------------|-----------------------|-------------------|---------------|
| 9Be (KED)  | 0.000 ppb             | 0 cps             |               |
| 11B (KED)  | 0.066 ppb             | 8 cps             | 99.0 %        |
| 23Na (KED) | -27.917 ppb           | 10,558 cps        | 2.8 %         |
| 24Mg (KED) | -0.682 ppb            | 43 cps            | 15.4 %        |
| 27Al (KED) | -0.295 ppb            | 3 cps             | 0.0 %         |
| 39K (KED)  | -20.182 ppb           | 4,026 cps         | 0.7 %         |
| 40Ca (KED) | 309.246 ppb           | 51,108,212 cps    | 3.6 %         |

| Category    | Concentration average | Intensity average | Intensity RSD |
|-------------|-----------------------|-------------------|---------------|
| 51V (KED)   | -0.001 ppb            | 9 cps             | 86.6 %        |
| 52Cr (KED)  | -0.006 ppb            | 29 cps            | 26.6 %        |
| 55Mn (KED)  | -0.013 ppb            | 40 cps            | 33.3 %        |
| 56Fe (KED)  | -0.265 ppb            | 419 cps           | 9.2 %         |
| 58Ni (KED)  | -0.099 ppb            | 2,348 cps         | 3.8 %         |
| 59Co (KED)  | -0.001 ppb            | 2 cps             | 86.6 %        |
| 63Cu (KED)  | -0.088 ppb            | 149 cps           | 26.1 %        |
| 64Zn (KED)  | -0.268 ppb            | 431 cps           | 5.0 %         |
| 69Ga (KED)  | -0.011 ppb            | 18 cps            | 47.2 %        |
| 75As (KED)  | -0.014 ppb            | 6 cps             | 34.6 %        |
| 80Se (KED)  | -0.165 ppb            | 1,001 cps         | 2.5 %         |
| 85Rb (KED)  | -0.017 ppb            | 8 cps             | 65.5 %        |
| 88Sr (KED)  | -0.019 ppb            | 18 cps            | 39.0 %        |
| 107Ag (KED) | -0.002 ppb            | 0 cps             |               |
| 114Cd (KED) | 0.000 ppb             | 4 cps             | 43.3 %        |
| 133Cs (KED) | -0.002 ppb            | 7 cps             | 132.3 %       |
| 138Ba (KED) | -0.044 ppb            | 166 cps           | 10.1 %        |
| 139La (KED) | 0.000 ppb             | 1 cps             | 173.2 %       |
| 140Ce (KED) | -0.001 ppb            | 0 cps             |               |
| 141Pr (KED) | 0.000 ppb             | 2 cps             | 86.6 %        |
| 142Nd (KED) | 0.000 ppb             | 0 cps             |               |
| 152Sm (KED) | 0.000 ppb             | 0 cps             |               |
| 153Eu (KED) | 0.000 ppb             | 0 cps             |               |
| 158Gd (KED) | 0.000 ppb             | 0 cps             |               |
| 164Dy (KED) | 0.000 ppb             | 0 cps             |               |
| 165Ho (KED) | 0.000 ppb             | 0 cps             |               |
| 166Er (KED) | 0.000 ppb             | 1 cps             | 173.2 %       |
| 169Tm (KED) | 0.000 ppb             | 0 cps             |               |
| 174Yb (KED) | 0.000 ppb             | 0 cps             |               |
| 175Lu (KED) | 0.000 ppb             | 0 cps             |               |
| 205Tl (KED) | 0.000 ppb             | 4 cps             | 114.6 %       |
| 208Pb (KED) | -0.025 ppb            | 97 cps            | 12.4 %        |
| 232Th (KED) | -0.002 ppb            | 0 cps             |               |
| 238U (KED)  | 0.000 ppb             | 1 cps             | 173.2 %       |

## Sample Summary

Instrument ID: iCAP Q

Analysis index: 2

Analysis name: blk

Analysis started at: 8/26/2021 5:05:44 PM

User name: WINDOWS-UPCI4ER\Administrator

| Category    | Concentration average | Concentration RSD |
|-------------|-----------------------|-------------------|
| 9Be (KED)   | 0.000 ppb             |                   |
| 11B (KED)   | 0.000 ppb             |                   |
| 23Na (KED)  | 0.000 ppb             |                   |
| 24Mg (KED)  | 0.000 ppb             |                   |
| 27Al (KED)  | 0.000 ppb             |                   |
| 39K (KED)   | 0.000 ppb             |                   |
| 40Ca (KED)  | 0.000 ppb             |                   |
| 51V (KED)   | 0.000 ppb             |                   |
| 52Cr (KED)  | 0.000 ppb             |                   |
| 55Mn (KED)  | 0.000 ppb             |                   |
| 56Fe (KED)  | 0.000 ppb             |                   |
| 58Ni (KED)  | 0.000 ppb             |                   |
| 59Co (KED)  | 0.000 ppb             |                   |
| 63Cu (KED)  | 0.000 ppb             |                   |
| 64Zn (KED)  | 0.000 ppb             |                   |
| 69Ga (KED)  | 0.000 ppb             |                   |
| 75As (KED)  | 0.000 ppb             |                   |
| 80Se (KED)  | 0.000 ppb             |                   |
| 85Rb (KED)  | 0.000 ppb             |                   |
| 88Sr (KED)  | 0.000 ppb             |                   |
| 107Ag (KED) | 0.000 ppb             |                   |
| 114Cd (KED) | 0.000 ppb             |                   |
| 133Cs (KED) | 0.000 ppb             |                   |
| 138Ba (KED) | 0.000 ppb             |                   |
| 139La (KED) | 0.000 ppb             |                   |
| 140Ce (KED) | 0.000 ppb             |                   |
| 141Pr (KED) | 0.000 ppb             |                   |
| 142Nd (KED) | 0.000 ppb             |                   |
| 152Sm (KED) | 0.000 ppb             |                   |
| 153Eu (KED) | 0.000 ppb             |                   |
| 158Gd (KED) | 0.000 ppb             |                   |
| 164Dy (KED) | 0.000 ppb             |                   |
| 165Ho (KED) | 0.000 ppb             |                   |
| 166Er (KED) | 0.000 ppb             |                   |
| 169Tm (KED) | 0.000 ppb             |                   |
| 174Yb (KED) | 0.000 ppb             |                   |
| 175Lu (KED) | 0.000 ppb             |                   |
| 205Tl (KED) | 0.000 ppb             |                   |
| 208Pb (KED) | 0.000 ppb             |                   |
| 232Th (KED) | 0.000 ppb             |                   |
| 238U (KED)  | 0.000 ppb             |                   |

| Category   | Concentration average | Intensity average | Intensity RSD |
|------------|-----------------------|-------------------|---------------|
| 9Be (KED)  | 0.000 ppb             | 0 cps             |               |
| 11B (KED)  | 0.000 ppb             | 3 cps             |               |
| 23Na (KED) | 0.000 ppb             | 47,189 cps        |               |
| 24Mg (KED) | 0.000 ppb             | 370 cps           |               |
| 27Al (KED) | 0.000 ppb             | 40 cps            |               |
| 39K (KED)  | 0.000 ppb             | 9,554 cps         |               |
| 40Ca (KED) | 0.000 ppb             | 43,104,726 cps    |               |

| Category    | Concentration average | Intensity average | Intensity RSD |
|-------------|-----------------------|-------------------|---------------|
| 51V (KED)   | 0.000 ppb             | 13 cps            |               |
| 52Cr (KED)  | 0.000 ppb             | 97 cps            |               |
| 55Mn (KED)  | 0.000 ppb             | 113 cps           |               |
| 56Fe (KED)  | 0.000 ppb             | 3,317 cps         |               |
| 58Ni (KED)  | 0.000 ppb             | 3,797 cps         |               |
| 59Co (KED)  | 0.000 ppb             | 17 cps            |               |
| 63Cu (KED)  | 0.000 ppb             | 1,740 cps         |               |
| 64Zn (KED)  | 0.000 ppb             | 1,603 cps         |               |
| 69Ga (KED)  | 0.000 ppb             | 80 cps            |               |
| 75As (KED)  | 0.000 ppb             | 23 cps            |               |
| 80Se (KED)  | 0.000 ppb             | 1,067 cps         |               |
| 85Rb (KED)  | 0.000 ppb             | 97 cps            |               |
| 88Sr (KED)  | 0.000 ppb             | 157 cps           |               |
| 107Ag (KED) | 0.000 ppb             | 87 cps            |               |
| 114Cd (KED) | 0.000 ppb             | 13 cps            |               |
| 133Cs (KED) | 0.000 ppb             | 47 cps            |               |
| 138Ba (KED) | 0.000 ppb             | 1,733 cps         |               |
| 139La (KED) | 0.000 ppb             | 17 cps            |               |
| 140Ce (KED) | 0.000 ppb             | 97 cps            |               |
| 141Pr (KED) | 0.000 ppb             | 3 cps             |               |
| 142Nd (KED) | 0.000 ppb             | 13 cps            |               |
| 152Sm (KED) | 0.000 ppb             | 0 cps             |               |
| 153Eu (KED) | 0.000 ppb             | 0 cps             |               |
| 158Gd (KED) | 0.000 ppb             | 3 cps             |               |
| 164Dy (KED) | 0.000 ppb             | 0 cps             |               |
| 165Ho (KED) | 0.000 ppb             | 10 cps            |               |
| 166Er (KED) | 0.000 ppb             | 17 cps            |               |
| 169Tm (KED) | 0.000 ppb             | 3 cps             |               |
| 174Yb (KED) | 0.000 ppb             | 3 cps             |               |
| 175Lu (KED) | 0.000 ppb             | 0 cps             |               |
| 205Tl (KED) | 0.000 ppb             | 0 cps             |               |
| 208Pb (KED) | 0.000 ppb             | 3,180 cps         |               |
| 232Th (KED) | 0.000 ppb             | 523 cps           |               |
| 238U (KED)  | 0.000 ppb             | 100 cps           |               |

## Sample Summary

Instrument ID: iCAP Q

Analysis index: 3

Analysis name: std1

Analysis started at: 8/26/2021 5:08:05 PM

User name: WINDOWS-UPCI4ER\Administrator

| Category    | Concentration average | Concentration RSD |
|-------------|-----------------------|-------------------|
| 9Be (KED)   | 100.000 ppb           |                   |
| 11B (KED)   | 100.000 ppb           |                   |
| 23Na (KED)  | 100.000 ppb           |                   |
| 24Mg (KED)  | 100.000 ppb           |                   |
| 27Al (KED)  | 100.000 ppb           |                   |
| 39K (KED)   | 100.000 ppb           |                   |
| 40Ca (KED)  | 100.000 ppb           |                   |
| 51V (KED)   | 100.000 ppb           |                   |
| 52Cr (KED)  | 100.000 ppb           |                   |
| 55Mn (KED)  | 100.000 ppb           |                   |
| 56Fe (KED)  | 100.000 ppb           |                   |
| 58Ni (KED)  | 100.000 ppb           |                   |
| 59Co (KED)  | 100.000 ppb           |                   |
| 63Cu (KED)  | 100.000 ppb           |                   |
| 64Zn (KED)  | 100.000 ppb           |                   |
| 69Ga (KED)  | 100.000 ppb           |                   |
| 75As (KED)  | 100.000 ppb           |                   |
| 80Se (KED)  | 100.000 ppb           |                   |
| 85Rb (KED)  | 100.000 ppb           |                   |
| 88Sr (KED)  | 100.000 ppb           |                   |
| 107Ag (KED) | 100.000 ppb           |                   |
| 114Cd (KED) | 100.000 ppb           |                   |
| 133Cs (KED) | 100.000 ppb           |                   |
| 138Ba (KED) | 100.000 ppb           |                   |
| 139La (KED) | 100.000 ppb           |                   |
| 140Ce (KED) | 100.000 ppb           |                   |
| 141Pr (KED) | 100.000 ppb           |                   |
| 142Nd (KED) | 100.000 ppb           |                   |
| 152Sm (KED) | 100.000 ppb           |                   |
| 153Eu (KED) | 100.000 ppb           |                   |
| 158Gd (KED) | 100.000 ppb           |                   |
| 164Dy (KED) | 100.000 ppb           |                   |
| 165Ho (KED) | 100.000 ppb           |                   |
| 166Er (KED) | 100.000 ppb           |                   |
| 169Tm (KED) | 100.000 ppb           |                   |
| 174Yb (KED) | 100.000 ppb           |                   |
| 175Lu (KED) | 100.000 ppb           |                   |
| 205Tl (KED) | 100.000 ppb           |                   |
| 208Pb (KED) | 100.000 ppb           |                   |
| 232Th (KED) | 100.000 ppb           |                   |
| 238U (KED)  | 100.000 ppb           |                   |

| Category   | Concentration average | Intensity average | Intensity RSD |
|------------|-----------------------|-------------------|---------------|
| 9Be (KED)  | 100.000 ppb           | 12,326 cps        |               |
| 11B (KED)  | 100.000 ppb           | 6,748 cps         |               |
| 23Na (KED) | 100.000 ppb           | 178,405 cps       |               |
| 24Mg (KED) | 100.000 ppb           | 48,237 cps        |               |
| 27Al (KED) | 100.000 ppb           | 12,490 cps        |               |
| 39K (KED)  | 100.000 ppb           | 36,941 cps        |               |
| 40Ca (KED) | 100.000 ppb           | 45,692,786 cps    |               |

| Category    | Concentration average | Intensity average | Intensity RSD |
|-------------|-----------------------|-------------------|---------------|
| 51V (KED)   | 100.000 ppb           | 767,488 cps       |               |
| 52Cr (KED)  | 100.000 ppb           | 1,193,223 cps     |               |
| 55Mn (KED)  | 100.000 ppb           | 559,682 cps       |               |
| 56Fe (KED)  | 100.000 ppb           | 1,096,304 cps     |               |
| 58Ni (KED)  | 100.000 ppb           | 1,472,294 cps     |               |
| 59Co (KED)  | 100.000 ppb           | 2,375,121 cps     |               |
| 63Cu (KED)  | 100.000 ppb           | 1,803,488 cps     |               |
| 64Zn (KED)  | 100.000 ppb           | 438,567 cps       |               |
| 69Ga (KED)  | 100.000 ppb           | 558,689 cps       |               |
| 75As (KED)  | 100.000 ppb           | 130,754 cps       |               |
| 80Se (KED)  | 100.000 ppb           | 40,723 cps        |               |
| 85Rb (KED)  | 100.000 ppb           | 531,911 cps       |               |
| 88Sr (KED)  | 100.000 ppb           | 718,375 cps       |               |
| 107Ag (KED) | 100.000 ppb           | 4,862,475 cps     |               |
| 114Cd (KED) | 100.000 ppb           | 1,831,407 cps     |               |
| 133Cs (KED) | 100.000 ppb           | 2,626,126 cps     |               |
| 138Ba (KED) | 100.000 ppb           | 3,570,294 cps     |               |
| 139La (KED) | 100.000 ppb           | 7,242,930 cps     |               |
| 140Ce (KED) | 100.000 ppb           | 10,017,440 cps    |               |
| 141Pr (KED) | 100.000 ppb           | 9,898,356 cps     |               |
| 142Nd (KED) | 100.000 ppb           | 4,050,749 cps     |               |
| 152Sm (KED) | 100.000 ppb           | 3,977,356 cps     |               |
| 153Eu (KED) | 100.000 ppb           | 7,663,220 cps     |               |
| 158Gd (KED) | 100.000 ppb           | 5,364,617 cps     |               |
| 164Dy (KED) | 100.000 ppb           | 5,732,259 cps     |               |
| 165Ho (KED) | 100.000 ppb           | 21,137,213 cps    |               |
| 166Er (KED) | 100.000 ppb           | 7,296,023 cps     |               |
| 169Tm (KED) | 100.000 ppb           | 23,471,436 cps    |               |
| 174Yb (KED) | 100.000 ppb           | 8,852,138 cps     |               |
| 175Lu (KED) | 100.000 ppb           | 13,687,769 cps    |               |
| 205Tl (KED) | 100.000 ppb           | 17,980,389 cps    |               |
| 208Pb (KED) | 100.000 ppb           | 12,397,376 cps    |               |
| 232Th (KED) | 100.000 ppb           | 23,514,540 cps    |               |
| 238U (KED)  | 100.000 ppb           | 28,913,231 cps    |               |

## Sample Summary

Instrument ID: iCAP Q

Analysis index: 4

Analysis name: 179407jian

Analysis started at: 8/26/2021 5:09:57 PM

User name: WINDOWS-UPCI4ER\Administrator

| Category    | Concentration average | Concentration RSD |
|-------------|-----------------------|-------------------|
| 9Be (KED)   | 0.135 ppb             |                   |
| 11B (KED)   | 5.189 ppb             |                   |
| 23Na (KED)  | 1,905.097 ppb         |                   |
| 24Mg (KED)  | 1,496.505 ppb         |                   |
| 27Al (KED)  | 1,796.072 ppb         |                   |
| 39K (KED)   | 6,145.100 ppb         |                   |
| 40Ca (KED)  | -196.312 ppb          |                   |
| 51V (KED)   | 3.588 ppb             |                   |
| 52Cr (KED)  | 3.647 ppb             |                   |
| 55Mn (KED)  | 47.686 ppb            |                   |
| 56Fe (KED)  | 1,935.259 ppb         |                   |
| 58Ni (KED)  | 9.363 ppb             |                   |
| 59Co (KED)  | 0.899 ppb             |                   |
| 63Cu (KED)  | 9.905 ppb             |                   |
| 64Zn (KED)  | 155.579 ppb           |                   |
| 69Ga (KED)  | 4.160 ppb             |                   |
| 75As (KED)  | 0.997 ppb             |                   |
| 80Se (KED)  | 0.731 ppb             |                   |
| 85Rb (KED)  | 3.962 ppb             |                   |
| 88Sr (KED)  | 19.023 ppb            |                   |
| 107Ag (KED) | 0.116 ppb             |                   |
| 114Cd (KED) | 0.163 ppb             |                   |
| 133Cs (KED) | 0.364 ppb             |                   |
| 138Ba (KED) | 15.143 ppb            |                   |
| 139La (KED) | 1.819 ppb             |                   |
| 140Ce (KED) | 3.787 ppb             |                   |
| 141Pr (KED) | 0.433 ppb             |                   |
| 142Nd (KED) | 2.412 ppb             |                   |
| 152Sm (KED) | 0.339 ppb             |                   |
| 153Eu (KED) | 0.064 ppb             |                   |
| 158Gd (KED) | 0.292 ppb             |                   |
| 164Dy (KED) | 0.228 ppb             |                   |
| 165Ho (KED) | 0.039 ppb             |                   |
| 166Er (KED) | 0.102 ppb             |                   |
| 169Tm (KED) | 0.015 ppb             |                   |
| 174Yb (KED) | 0.085 ppb             |                   |
| 175Lu (KED) | 0.013 ppb             |                   |
| 205Tl (KED) | 0.035 ppb             |                   |
| 208Pb (KED) | 2.166 ppb             |                   |
| 232Th (KED) | 1.009 ppb             |                   |
| 238U (KED)  | 0.177 ppb             |                   |

| Category   | Concentration average | Intensity average | Intensity RSD |
|------------|-----------------------|-------------------|---------------|
| 9Be (KED)  | 0.135 ppb             | 17 cps            |               |
| 11B (KED)  | 5.189 ppb             | 353 cps           |               |
| 23Na (KED) | 1,905.097 ppb         | 2,546,986 cps     |               |
| 24Mg (KED) | 1,496.505 ppb         | 716,695 cps       |               |
| 27Al (KED) | 1,796.072 ppb         | 223,644 cps       |               |
| 39K (KED)  | 6,145.100 ppb         | 1,692,548 cps     |               |
| 40Ca (KED) | -196.312 ppb          | 38,024,054 cps    |               |

| Category    | Concentration average | Intensity average | Intensity RSD |
|-------------|-----------------------|-------------------|---------------|
| 51V (KED)   | 3.588 ppb             | 27,554 cps        |               |
| 52Cr (KED)  | 3.647 ppb             | 43,613 cps        |               |
| 55Mn (KED)  | 47.686 ppb            | 266,950 cps       |               |
| 56Fe (KED)  | 1,935.259 ppb         | 21,155,440 cps    |               |
| 58Ni (KED)  | 9.363 ppb             | 141,291 cps       |               |
| 59Co (KED)  | 0.899 ppb             | 21,358 cps        |               |
| 63Cu (KED)  | 9.905 ppb             | 180,210 cps       |               |
| 64Zn (KED)  | 155.579 ppb           | 681,425 cps       |               |
| 69Ga (KED)  | 4.160 ppb             | 23,319 cps        |               |
| 75As (KED)  | 0.997 ppb             | 1,327 cps         |               |
| 80Se (KED)  | 0.731 ppb             | 1,357 cps         |               |
| 85Rb (KED)  | 3.962 ppb             | 21,168 cps        |               |
| 88Sr (KED)  | 19.023 ppb            | 136,782 cps       |               |
| 107Ag (KED) | 0.116 ppb             | 5,745 cps         |               |
| 114Cd (KED) | 0.163 ppb             | 2,990 cps         |               |
| 133Cs (KED) | 0.364 ppb             | 9,607 cps         |               |
| 138Ba (KED) | 15.143 ppb            | 542,108 cps       |               |
| 139La (KED) | 1.819 ppb             | 131,772 cps       |               |
| 140Ce (KED) | 3.787 ppb             | 379,465 cps       |               |
| 141Pr (KED) | 0.433 ppb             | 42,837 cps        |               |
| 142Nd (KED) | 2.412 ppb             | 97,711 cps        |               |
| 152Sm (KED) | 0.339 ppb             | 13,497 cps        |               |
| 153Eu (KED) | 0.064 ppb             | 4,934 cps         |               |
| 158Gd (KED) | 0.292 ppb             | 15,693 cps        |               |
| 164Dy (KED) | 0.228 ppb             | 13,054 cps        |               |
| 165Ho (KED) | 0.039 ppb             | 8,159 cps         |               |
| 166Er (KED) | 0.102 ppb             | 7,442 cps         |               |
| 169Tm (KED) | 0.015 ppb             | 3,500 cps         |               |
| 174Yb (KED) | 0.085 ppb             | 7,556 cps         |               |
| 175Lu (KED) | 0.013 ppb             | 1,733 cps         |               |
| 205Tl (KED) | 0.035 ppb             | 6,325 cps         |               |
| 208Pb (KED) | 2.166 ppb             | 271,668 cps       |               |
| 232Th (KED) | 1.009 ppb             | 237,663 cps       |               |
| 238U (KED)  | 0.177 ppb             | 51,266 cps        |               |

## Sample Summary

Instrument ID: iCAP Q

Analysis index: 5

Analysis name: 051920jian

Analysis started at: 8/26/2021 5:12:08 PM

User name: WINDOWS-UPCI4ER\Administrator

| Category    | Concentration average | Concentration RSD |
|-------------|-----------------------|-------------------|
| 9Be (KED)   | 0.054 ppb             |                   |
| 11B (KED)   | 11.910 ppb            |                   |
| 23Na (KED)  | 1,322.019 ppb         |                   |
| 24Mg (KED)  | 1,293.508 ppb         |                   |
| 27Al (KED)  | 1,731.633 ppb         |                   |
| 39K (KED)   | 4,876.199 ppb         |                   |
| 40Ca (KED)  | -64.170 ppb           |                   |
| 51V (KED)   | 3.352 ppb             |                   |
| 52Cr (KED)  | 3.588 ppb             |                   |
| 55Mn (KED)  | 40.269 ppb            |                   |
| 56Fe (KED)  | 1,676.072 ppb         |                   |
| 58Ni (KED)  | 7.545 ppb             |                   |
| 59Co (KED)  | 0.818 ppb             |                   |
| 63Cu (KED)  | 10.904 ppb            |                   |
| 64Zn (KED)  | 149.523 ppb           |                   |
| 69Ga (KED)  | 3.891 ppb             |                   |
| 75As (KED)  | 0.918 ppb             |                   |
| 80Se (KED)  | 1.732 ppb             |                   |
| 85Rb (KED)  | 3.683 ppb             |                   |
| 88Sr (KED)  | 18.123 ppb            |                   |
| 107Ag (KED) | 0.171 ppb             |                   |
| 114Cd (KED) | 0.313 ppb             |                   |
| 133Cs (KED) | 0.337 ppb             |                   |
| 138Ba (KED) | 13.966 ppb            |                   |
| 139La (KED) | 1.614 ppb             |                   |
| 140Ce (KED) | 3.197 ppb             |                   |
| 141Pr (KED) | 0.391 ppb             |                   |
| 142Nd (KED) | 2.068 ppb             |                   |
| 152Sm (KED) | 0.302 ppb             |                   |
| 153Eu (KED) | 0.059 ppb             |                   |
| 158Gd (KED) | 0.287 ppb             |                   |
| 164Dy (KED) | 0.193 ppb             |                   |
| 165Ho (KED) | 0.036 ppb             |                   |
| 166Er (KED) | 0.100 ppb             |                   |
| 169Tm (KED) | 0.014 ppb             |                   |
| 174Yb (KED) | 0.079 ppb             |                   |
| 175Lu (KED) | 0.011 ppb             |                   |
| 205Tl (KED) | 0.029 ppb             |                   |
| 208Pb (KED) | 1.872 ppb             |                   |
| 232Th (KED) | 0.640 ppb             |                   |
| 238U (KED)  | 0.150 ppb             |                   |

| Category   | Concentration average | Intensity average | Intensity RSD |
|------------|-----------------------|-------------------|---------------|
| 9Be (KED)  | 0.054 ppb             | 7 cps             |               |
| 11B (KED)  | 11.910 ppb            | 807 cps           |               |
| 23Na (KED) | 1,322.019 ppb         | 1,781,893 cps     |               |
| 24Mg (KED) | 1,293.508 ppb         | 619,527 cps       |               |
| 27Al (KED) | 1,731.633 ppb         | 215,622 cps       |               |
| 39K (KED)  | 4,876.199 ppb         | 1,345,027 cps     |               |
| 40Ca (KED) | -64.170 ppb           | 41,443,978 cps    |               |

| Category    | Concentration average | Intensity average | Intensity RSD |
|-------------|-----------------------|-------------------|---------------|
| 51V (KED)   | 3.352 ppb             | 25,740 cps        |               |
| 52Cr (KED)  | 3.588 ppb             | 42,907 cps        |               |
| 55Mn (KED)  | 40.269 ppb            | 225,446 cps       |               |
| 56Fe (KED)  | 1,676.072 ppb         | 18,322,562 cps    |               |
| 58Ni (KED)  | 7.545 ppb             | 114,597 cps       |               |
| 59Co (KED)  | 0.818 ppb             | 19,442 cps        |               |
| 63Cu (KED)  | 10.904 ppb            | 198,207 cps       |               |
| 64Zn (KED)  | 149.523 ppb           | 654,964 cps       |               |
| 69Ga (KED)  | 3.891 ppb             | 21,816 cps        |               |
| 75As (KED)  | 0.918 ppb             | 1,223 cps         |               |
| 80Se (KED)  | 1.732 ppb             | 1,753 cps         |               |
| 85Rb (KED)  | 3.683 ppb             | 19,682 cps        |               |
| 88Sr (KED)  | 18.123 ppb            | 130,317 cps       |               |
| 107Ag (KED) | 0.171 ppb             | 8,379 cps         |               |
| 114Cd (KED) | 0.313 ppb             | 5,738 cps         |               |
| 133Cs (KED) | 0.337 ppb             | 8,907 cps         |               |
| 138Ba (KED) | 13.966 ppb            | 500,103 cps       |               |
| 139La (KED) | 1.614 ppb             | 116,939 cps       |               |
| 140Ce (KED) | 3.197 ppb             | 320,333 cps       |               |
| 141Pr (KED) | 0.391 ppb             | 38,690 cps        |               |
| 142Nd (KED) | 2.068 ppb             | 83,770 cps        |               |
| 152Sm (KED) | 0.302 ppb             | 12,029 cps        |               |
| 153Eu (KED) | 0.059 ppb             | 4,541 cps         |               |
| 158Gd (KED) | 0.287 ppb             | 15,423 cps        |               |
| 164Dy (KED) | 0.193 ppb             | 11,052 cps        |               |
| 165Ho (KED) | 0.036 ppb             | 7,719 cps         |               |
| 166Er (KED) | 0.100 ppb             | 7,279 cps         |               |
| 169Tm (KED) | 0.014 ppb             | 3,190 cps         |               |
| 174Yb (KED) | 0.079 ppb             | 7,019 cps         |               |
| 175Lu (KED) | 0.011 ppb             | 1,530 cps         |               |
| 205Tl (KED) | 0.029 ppb             | 5,151 cps         |               |
| 208Pb (KED) | 1.872 ppb             | 235,145 cps       |               |
| 232Th (KED) | 0.640 ppb             | 150,988 cps       |               |
| 238U (KED)  | 0.150 ppb             | 43,326 cps        |               |

## Sample Summary

Instrument ID: iCAP Q

Analysis index: 6

Analysis name: 179466jian

Analysis started at: 8/26/2021 5:14:10 PM

User name: WINDOWS-UPCI4ER\Administrator

| Category    | Concentration average | Concentration RSD |
|-------------|-----------------------|-------------------|
| 9Be (KED)   | 0.054 ppb             |                   |
| 11B (KED)   | 11.218 ppb            |                   |
| 23Na (KED)  | 2,042.490 ppb         |                   |
| 24Mg (KED)  | 1,656.232 ppb         |                   |
| 27Al (KED)  | 2,052.140 ppb         |                   |
| 39K (KED)   | 8,405.961 ppb         |                   |
| 40Ca (KED)  | 194.351 ppb           |                   |
| 51V (KED)   | 4.335 ppb             |                   |
| 52Cr (KED)  | 4.333 ppb             |                   |
| 55Mn (KED)  | 54.766 ppb            |                   |
| 56Fe (KED)  | 2,230.481 ppb         |                   |
| 58Ni (KED)  | 10.451 ppb            |                   |
| 59Co (KED)  | 1.052 ppb             |                   |
| 63Cu (KED)  | 11.829 ppb            |                   |
| 64Zn (KED)  | 183.308 ppb           |                   |
| 69Ga (KED)  | 4.637 ppb             |                   |
| 75As (KED)  | 1.221 ppb             |                   |
| 80Se (KED)  | 2.287 ppb             |                   |
| 85Rb (KED)  | 4.812 ppb             |                   |
| 88Sr (KED)  | 21.905 ppb            |                   |
| 107Ag (KED) | 0.157 ppb             |                   |
| 114Cd (KED) | 0.382 ppb             |                   |
| 133Cs (KED) | 0.401 ppb             |                   |
| 138Ba (KED) | 15.609 ppb            |                   |
| 139La (KED) | 1.964 ppb             |                   |
| 140Ce (KED) | 3.951 ppb             |                   |
| 141Pr (KED) | 0.484 ppb             |                   |
| 142Nd (KED) | 2.589 ppb             |                   |
| 152Sm (KED) | 0.360 ppb             |                   |
| 153Eu (KED) | 0.073 ppb             |                   |
| 158Gd (KED) | 0.336 ppb             |                   |
| 164Dy (KED) | 0.253 ppb             |                   |
| 165Ho (KED) | 0.043 ppb             |                   |
| 166Er (KED) | 0.109 ppb             |                   |
| 169Tm (KED) | 0.016 ppb             |                   |
| 174Yb (KED) | 0.093 ppb             |                   |
| 175Lu (KED) | 0.014 ppb             |                   |
| 205Tl (KED) | 0.031 ppb             |                   |
| 208Pb (KED) | 2.227 ppb             |                   |
| 232Th (KED) | 0.729 ppb             |                   |
| 238U (KED)  | 0.148 ppb             |                   |

| Category   | Concentration average | Intensity average | Intensity RSD |
|------------|-----------------------|-------------------|---------------|
| 9Be (KED)  | 0.054 ppb             | 7 cps             |               |
| 11B (KED)  | 11.218 ppb            | 760 cps           |               |
| 23Na (KED) | 2,042.490 ppb         | 2,727,268 cps     |               |
| 24Mg (KED) | 1,656.232 ppb         | 793,150 cps       |               |
| 27Al (KED) | 2,052.140 ppb         | 255,524 cps       |               |
| 39K (KED)  | 8,405.961 ppb         | 2,311,743 cps     |               |
| 40Ca (KED) | 194.351 ppb           | 48,134,655 cps    |               |

| Category    | Concentration average | Intensity average | Intensity RSD |
|-------------|-----------------------|-------------------|---------------|
| 51V (KED)   | 4.335 ppb             | 33,284 cps        |               |
| 52Cr (KED)  | 4.333 ppb             | 51,791 cps        |               |
| 55Mn (KED)  | 54.766 ppb            | 306,568 cps       |               |
| 56Fe (KED)  | 2,230.481 ppb         | 24,382,174 cps    |               |
| 58Ni (KED)  | 10.451 ppb            | 157,271 cps       |               |
| 59Co (KED)  | 1.052 ppb             | 25,002 cps        |               |
| 63Cu (KED)  | 11.829 ppb            | 214,876 cps       |               |
| 64Zn (KED)  | 183.308 ppb           | 802,591 cps       |               |
| 69Ga (KED)  | 4.637 ppb             | 25,984 cps        |               |
| 75As (KED)  | 1.221 ppb             | 1,620 cps         |               |
| 80Se (KED)  | 2.287 ppb             | 1,973 cps         |               |
| 85Rb (KED)  | 4.812 ppb             | 25,690 cps        |               |
| 88Sr (KED)  | 21.905 ppb            | 157,481 cps       |               |
| 107Ag (KED) | 0.157 ppb             | 7,702 cps         |               |
| 114Cd (KED) | 0.382 ppb             | 7,002 cps         |               |
| 133Cs (KED) | 0.401 ppb             | 10,564 cps        |               |
| 138Ba (KED) | 15.609 ppb            | 558,733 cps       |               |
| 139La (KED) | 1.964 ppb             | 142,266 cps       |               |
| 140Ce (KED) | 3.951 ppb             | 395,863 cps       |               |
| 141Pr (KED) | 0.484 ppb             | 47,865 cps        |               |
| 142Nd (KED) | 2.589 ppb             | 104,886 cps       |               |
| 152Sm (KED) | 0.360 ppb             | 14,328 cps        |               |
| 153Eu (KED) | 0.073 ppb             | 5,578 cps         |               |
| 158Gd (KED) | 0.336 ppb             | 18,046 cps        |               |
| 164Dy (KED) | 0.253 ppb             | 14,525 cps        |               |
| 165Ho (KED) | 0.043 ppb             | 9,010 cps         |               |
| 166Er (KED) | 0.109 ppb             | 7,946 cps         |               |
| 169Tm (KED) | 0.016 ppb             | 3,691 cps         |               |
| 174Yb (KED) | 0.093 ppb             | 8,199 cps         |               |
| 175Lu (KED) | 0.014 ppb             | 1,860 cps         |               |
| 205Tl (KED) | 0.031 ppb             | 5,585 cps         |               |
| 208Pb (KED) | 2.227 ppb             | 279,160 cps       |               |
| 232Th (KED) | 0.729 ppb             | 172,040 cps       |               |
| 238U (KED)  | 0.148 ppb             | 43,021 cps        |               |

## Sample Summary

Instrument ID: iCAP Q

Analysis index: 7

Analysis name: 179422jian

Analysis started at: 8/26/2021 5:16:03 PM

User name: WINDOWS-UPCI4ER\Administrator

| Category    | Concentration average | Concentration RSD |
|-------------|-----------------------|-------------------|
| 9Be (KED)   | 0.189 ppb             |                   |
| 11B (KED)   | 7.462 ppb             |                   |
| 23Na (KED)  | 1,906.476 ppb         |                   |
| 24Mg (KED)  | 2,395.523 ppb         |                   |
| 27Al (KED)  | 3,010.110 ppb         |                   |
| 39K (KED)   | 9,123.010 ppb         |                   |
| 40Ca (KED)  | 463.005 ppb           |                   |
| 51V (KED)   | 6.138 ppb             |                   |
| 52Cr (KED)  | 5.736 ppb             |                   |
| 55Mn (KED)  | 77.850 ppb            |                   |
| 56Fe (KED)  | 3,226.140 ppb         |                   |
| 58Ni (KED)  | 13.784 ppb            |                   |
| 59Co (KED)  | 1.458 ppb             |                   |
| 63Cu (KED)  | 14.260 ppb            |                   |
| 64Zn (KED)  | 168.581 ppb           |                   |
| 69Ga (KED)  | 7.149 ppb             |                   |
| 75As (KED)  | 1.533 ppb             |                   |
| 80Se (KED)  | 1.353 ppb             |                   |
| 85Rb (KED)  | 6.340 ppb             |                   |
| 88Sr (KED)  | 30.052 ppb            |                   |
| 107Ag (KED) | 0.124 ppb             |                   |
| 114Cd (KED) | 0.123 ppb             |                   |
| 133Cs (KED) | 0.553 ppb             |                   |
| 138Ba (KED) | 21.843 ppb            |                   |
| 139La (KED) | 2.748 ppb             |                   |
| 140Ce (KED) | 5.703 ppb             |                   |
| 141Pr (KED) | 0.646 ppb             |                   |
| 142Nd (KED) | 3.414 ppb             |                   |
| 152Sm (KED) | 0.492 ppb             |                   |
| 153Eu (KED) | 0.094 ppb             |                   |
| 158Gd (KED) | 0.454 ppb             |                   |
| 164Dy (KED) | 0.322 ppb             |                   |
| 165Ho (KED) | 0.063 ppb             |                   |
| 166Er (KED) | 0.169 ppb             |                   |
| 169Tm (KED) | 0.023 ppb             |                   |
| 174Yb (KED) | 0.130 ppb             |                   |
| 175Lu (KED) | 0.019 ppb             |                   |
| 205Tl (KED) | 0.038 ppb             |                   |
| 208Pb (KED) | 2.609 ppb             |                   |
| 232Th (KED) | 0.843 ppb             |                   |
| 238U (KED)  | 0.185 ppb             |                   |

| Category   | Concentration average | Intensity average | Intensity RSD |
|------------|-----------------------|-------------------|---------------|
| 9Be (KED)  | 0.189 ppb             | 23 cps            |               |
| 11B (KED)  | 7.462 ppb             | 507 cps           |               |
| 23Na (KED) | 1,906.476 ppb         | 2,548,796 cps     |               |
| 24Mg (KED) | 2,395.523 ppb         | 1,147,023 cps     |               |
| 27Al (KED) | 3,010.110 ppb         | 374,787 cps       |               |
| 39K (KED)  | 9,123.010 ppb         | 2,508,125 cps     |               |
| 40Ca (KED) | 463.005 ppb           | 55,087,563 cps    |               |

| Category    | Concentration average | Intensity average | Intensity RSD |
|-------------|-----------------------|-------------------|---------------|
| 51V (KED)   | 6.138 ppb             | 47,119 cps        |               |
| 52Cr (KED)  | 5.736 ppb             | 68,538 cps        |               |
| 55Mn (KED)  | 77.850 ppb            | 435,740 cps       |               |
| 56Fe (KED)  | 3,226.140 ppb         | 35,264,593 cps    |               |
| 58Ni (KED)  | 13.784 ppb            | 206,216 cps       |               |
| 59Co (KED)  | 1.458 ppb             | 34,638 cps        |               |
| 63Cu (KED)  | 14.260 ppb            | 258,675 cps       |               |
| 64Zn (KED)  | 168.581 ppb           | 738,239 cps       |               |
| 69Ga (KED)  | 7.149 ppb             | 40,014 cps        |               |
| 75As (KED)  | 1.533 ppb             | 2,027 cps         |               |
| 80Se (KED)  | 1.353 ppb             | 1,603 cps         |               |
| 85Rb (KED)  | 6.340 ppb             | 33,812 cps        |               |
| 88Sr (KED)  | 30.052 ppb            | 215,994 cps       |               |
| 107Ag (KED) | 0.124 ppb             | 6,122 cps         |               |
| 114Cd (KED) | 0.123 ppb             | 2,260 cps         |               |
| 133Cs (KED) | 0.553 ppb             | 14,562 cps        |               |
| 138Ba (KED) | 21.843 ppb            | 781,207 cps       |               |
| 139La (KED) | 2.748 ppb             | 199,019 cps       |               |
| 140Ce (KED) | 5.703 ppb             | 571,394 cps       |               |
| 141Pr (KED) | 0.646 ppb             | 63,981 cps        |               |
| 142Nd (KED) | 3.414 ppb             | 138,287 cps       |               |
| 152Sm (KED) | 0.492 ppb             | 19,552 cps        |               |
| 153Eu (KED) | 0.094 ppb             | 7,219 cps         |               |
| 158Gd (KED) | 0.454 ppb             | 24,337 cps        |               |
| 164Dy (KED) | 0.322 ppb             | 18,474 cps        |               |
| 165Ho (KED) | 0.063 ppb             | 13,274 cps        |               |
| 166Er (KED) | 0.169 ppb             | 12,313 cps        |               |
| 169Tm (KED) | 0.023 ppb             | 5,388 cps         |               |
| 174Yb (KED) | 0.130 ppb             | 11,469 cps        |               |
| 175Lu (KED) | 0.019 ppb             | 2,540 cps         |               |
| 205Tl (KED) | 0.038 ppb             | 6,909 cps         |               |
| 208Pb (KED) | 2.609 ppb             | 326,511 cps       |               |
| 232Th (KED) | 0.843 ppb             | 198,701 cps       |               |
| 238U (KED)  | 0.185 ppb             | 53,515 cps        |               |

## Sample Summary

Instrument ID: iCAP Q

Analysis index: 8

Analysis name: 046281jian

Analysis started at: 8/26/2021 5:17:59 PM

User name: WINDOWS-UPCI4ER\Administrator

| Category    | Concentration average | Concentration RSD |
|-------------|-----------------------|-------------------|
| 9Be (KED)   | 0.027 ppb             |                   |
| 11B (KED)   | 5.683 ppb             |                   |
| 23Na (KED)  | 1,197.244 ppb         |                   |
| 24Mg (KED)  | 859.061 ppb           |                   |
| 27Al (KED)  | 987.308 ppb           |                   |
| 39K (KED)   | 4,278.308 ppb         |                   |
| 40Ca (KED)  | 829.836 ppb           |                   |
| 51V (KED)   | 1.960 ppb             |                   |
| 52Cr (KED)  | 83.601 ppb            |                   |
| 55Mn (KED)  | 32.833 ppb            |                   |
| 56Fe (KED)  | 988.711 ppb           |                   |
| 58Ni (KED)  | 4.636 ppb             |                   |
| 59Co (KED)  | 2.237 ppb             |                   |
| 63Cu (KED)  | 13.257 ppb            |                   |
| 64Zn (KED)  | 164.088 ppb           |                   |
| 69Ga (KED)  | 41.550 ppb            |                   |
| 75As (KED)  | 0.747 ppb             |                   |
| 80Se (KED)  | 2.278 ppb             |                   |
| 85Rb (KED)  | 2.343 ppb             |                   |
| 88Sr (KED)  | 18.813 ppb            |                   |
| 107Ag (KED) | 0.083 ppb             |                   |
| 114Cd (KED) | 0.349 ppb             |                   |
| 133Cs (KED) | 0.163 ppb             |                   |
| 138Ba (KED) | 126.720 ppb           |                   |
| 139La (KED) | 0.893 ppb             |                   |
| 140Ce (KED) | 1.694 ppb             |                   |
| 141Pr (KED) | 0.198 ppb             |                   |
| 142Nd (KED) | 0.998 ppb             |                   |
| 152Sm (KED) | 0.184 ppb             |                   |
| 153Eu (KED) | 0.068 ppb             |                   |
| 158Gd (KED) | 0.124 ppb             |                   |
| 164Dy (KED) | 0.091 ppb             |                   |
| 165Ho (KED) | 0.016 ppb             |                   |
| 166Er (KED) | 0.046 ppb             |                   |
| 169Tm (KED) | 0.006 ppb             |                   |
| 174Yb (KED) | 0.034 ppb             |                   |
| 175Lu (KED) | 0.005 ppb             |                   |
| 205Tl (KED) | 0.018 ppb             |                   |
| 208Pb (KED) | 338.762 ppb           |                   |
| 232Th (KED) | 0.274 ppb             |                   |
| 238U (KED)  | 0.057 ppb             |                   |

| Category   | Concentration average | Intensity average | Intensity RSD |
|------------|-----------------------|-------------------|---------------|
| 9Be (KED)  | 0.027 ppb             | 3 cps             |               |
| 11B (KED)  | 5.683 ppb             | 387 cps           |               |
| 23Na (KED) | 1,197.244 ppb         | 1,618,168 cps     |               |
| 24Mg (KED) | 859.061 ppb           | 411,572 cps       |               |
| 27Al (KED) | 987.308 ppb           | 122,956 cps       |               |
| 39K (KED)  | 4,278.308 ppb         | 1,181,279 cps     |               |
| 40Ca (KED) | 829.836 ppb           | 64,581,388 cps    |               |

| Category    | Concentration average | Intensity average | Intensity RSD |
|-------------|-----------------------|-------------------|---------------|
| 51V (KED)   | 1.960 ppb             | 15,059 cps        |               |
| 52Cr (KED)  | 83.601 ppb            | 997,568 cps       |               |
| 55Mn (KED)  | 32.833 ppb            | 183,836 cps       |               |
| 56Fe (KED)  | 988.711 ppb           | 10,809,800 cps    |               |
| 58Ni (KED)  | 4.636 ppb             | 71,876 cps        |               |
| 59Co (KED)  | 2.237 ppb             | 53,139 cps        |               |
| 63Cu (KED)  | 13.257 ppb            | 240,604 cps       |               |
| 64Zn (KED)  | 164.088 ppb           | 718,606 cps       |               |
| 69Ga (KED)  | 41.550 ppb            | 232,184 cps       |               |
| 75As (KED)  | 0.747 ppb             | 1,000 cps         |               |
| 80Se (KED)  | 2.278 ppb             | 1,970 cps         |               |
| 85Rb (KED)  | 2.343 ppb             | 12,556 cps        |               |
| 88Sr (KED)  | 18.813 ppb            | 135,276 cps       |               |
| 107Ag (KED) | 0.083 ppb             | 4,101 cps         |               |
| 114Cd (KED) | 0.349 ppb             | 6,398 cps         |               |
| 133Cs (KED) | 0.163 ppb             | 4,324 cps         |               |
| 138Ba (KED) | 126.720 ppb           | 4,523,804 cps     |               |
| 139La (KED) | 0.893 ppb             | 64,669 cps        |               |
| 140Ce (KED) | 1.694 ppb             | 169,777 cps       |               |
| 141Pr (KED) | 0.198 ppb             | 19,629 cps        |               |
| 142Nd (KED) | 0.998 ppb             | 40,456 cps        |               |
| 152Sm (KED) | 0.184 ppb             | 7,302 cps         |               |
| 153Eu (KED) | 0.068 ppb             | 5,244 cps         |               |
| 158Gd (KED) | 0.124 ppb             | 6,648 cps         |               |
| 164Dy (KED) | 0.091 ppb             | 5,244 cps         |               |
| 165Ho (KED) | 0.016 ppb             | 3,444 cps         |               |
| 166Er (KED) | 0.046 ppb             | 3,380 cps         |               |
| 169Tm (KED) | 0.006 ppb             | 1,367 cps         |               |
| 174Yb (KED) | 0.034 ppb             | 2,994 cps         |               |
| 175Lu (KED) | 0.005 ppb             | 637 cps           |               |
| 205Tl (KED) | 0.018 ppb             | 3,167 cps         |               |
| 208Pb (KED) | 338.762 ppb           | 41,990,001 cps    |               |
| 232Th (KED) | 0.274 ppb             | 65,012 cps        |               |
| 238U (KED)  | 0.057 ppb             | 16,561 cps        |               |

## Sample Summary

Instrument ID: iCAP Q

Analysis index: 9

Analysis name: 1602126jian

Analysis started at: 8/26/2021 5:19:56 PM

User name: WINDOWS-UPCI4ER\Administrator

| Category    | Concentration average | Concentration RSD |
|-------------|-----------------------|-------------------|
| 9Be (KED)   | 0.027 ppb             |                   |
| 11B (KED)   | 4.547 ppb             |                   |
| 23Na (KED)  | 782.068 ppb           |                   |
| 24Mg (KED)  | 589.650 ppb           |                   |
| 27Al (KED)  | 580.008 ppb           |                   |
| 39K (KED)   | 4,482.361 ppb         |                   |
| 40Ca (KED)  | 756.227 ppb           |                   |
| 51V (KED)   | 1.086 ppb             |                   |
| 52Cr (KED)  | 2.481 ppb             |                   |
| 55Mn (KED)  | 16.137 ppb            |                   |
| 56Fe (KED)  | 538.992 ppb           |                   |
| 58Ni (KED)  | 4.076 ppb             |                   |
| 59Co (KED)  | 0.238 ppb             |                   |
| 63Cu (KED)  | 6.796 ppb             |                   |
| 64Zn (KED)  | 208.384 ppb           |                   |
| 69Ga (KED)  | 2.398 ppb             |                   |
| 75As (KED)  | 0.694 ppb             |                   |
| 80Se (KED)  | 2.026 ppb             |                   |
| 85Rb (KED)  | 1.949 ppb             |                   |
| 88Sr (KED)  | 5.721 ppb             |                   |
| 107Ag (KED) | 0.086 ppb             |                   |
| 114Cd (KED) | 0.269 ppb             |                   |
| 133Cs (KED) | 0.087 ppb             |                   |
| 138Ba (KED) | 7.245 ppb             |                   |
| 139La (KED) | 0.418 ppb             |                   |
| 140Ce (KED) | 0.815 ppb             |                   |
| 141Pr (KED) | 0.101 ppb             |                   |
| 142Nd (KED) | 0.523 ppb             |                   |
| 152Sm (KED) | 0.075 ppb             |                   |
| 153Eu (KED) | 0.014 ppb             |                   |
| 158Gd (KED) | 0.071 ppb             |                   |
| 164Dy (KED) | 0.051 ppb             |                   |
| 165Ho (KED) | 0.009 ppb             |                   |
| 166Er (KED) | 0.026 ppb             |                   |
| 169Tm (KED) | 0.003 ppb             |                   |
| 174Yb (KED) | 0.020 ppb             |                   |
| 175Lu (KED) | 0.003 ppb             |                   |
| 205Tl (KED) | 0.011 ppb             |                   |
| 208Pb (KED) | 1.161 ppb             |                   |
| 232Th (KED) | 0.136 ppb             |                   |
| 238U (KED)  | 0.026 ppb             |                   |

| Category   | Concentration average | Intensity average | Intensity RSD |
|------------|-----------------------|-------------------|---------------|
| 9Be (KED)  | 0.027 ppb             | 3 cps             |               |
| 11B (KED)  | 4.547 ppb             | 310 cps           |               |
| 23Na (KED) | 782.068 ppb           | 1,073,390 cps     |               |
| 24Mg (KED) | 589.650 ppb           | 282,615 cps       |               |
| 27Al (KED) | 580.008 ppb           | 72,249 cps        |               |
| 39K (KED)  | 4,482.361 ppb         | 1,237,164 cps     |               |
| 40Ca (KED) | 756.227 ppb           | 62,676,330 cps    |               |

| Category    | Concentration average | Intensity average | Intensity RSD |
|-------------|-----------------------|-------------------|---------------|
| 51V (KED)   | 1.086 ppb             | 8,349 cps         |               |
| 52Cr (KED)  | 2.481 ppb             | 29,699 cps        |               |
| 55Mn (KED)  | 16.137 ppb            | 90,413 cps        |               |
| 56Fe (KED)  | 538.992 ppb           | 5,894,432 cps     |               |
| 58Ni (KED)  | 4.076 ppb             | 63,655 cps        |               |
| 59Co (KED)  | 0.238 ppb             | 5,665 cps         |               |
| 63Cu (KED)  | 6.796 ppb             | 124,192 cps       |               |
| 64Zn (KED)  | 208.384 ppb           | 912,165 cps       |               |
| 69Ga (KED)  | 2.398 ppb             | 13,477 cps        |               |
| 75As (KED)  | 0.694 ppb             | 930 cps           |               |
| 80Se (KED)  | 2.026 ppb             | 1,870 cps         |               |
| 85Rb (KED)  | 1.949 ppb             | 10,461 cps        |               |
| 88Sr (KED)  | 5.721 ppb             | 41,245 cps        |               |
| 107Ag (KED) | 0.086 ppb             | 4,287 cps         |               |
| 114Cd (KED) | 0.269 ppb             | 4,941 cps         |               |
| 133Cs (KED) | 0.087 ppb             | 2,327 cps         |               |
| 138Ba (KED) | 7.245 ppb             | 260,268 cps       |               |
| 139La (KED) | 0.418 ppb             | 30,263 cps        |               |
| 140Ce (KED) | 0.815 ppb             | 81,754 cps        |               |
| 141Pr (KED) | 0.101 ppb             | 10,014 cps        |               |
| 142Nd (KED) | 0.523 ppb             | 21,218 cps        |               |
| 152Sm (KED) | 0.075 ppb             | 2,987 cps         |               |
| 153Eu (KED) | 0.014 ppb             | 1,110 cps         |               |
| 158Gd (KED) | 0.071 ppb             | 3,834 cps         |               |
| 164Dy (KED) | 0.051 ppb             | 2,914 cps         |               |
| 165Ho (KED) | 0.009 ppb             | 1,867 cps         |               |
| 166Er (KED) | 0.026 ppb             | 1,887 cps         |               |
| 169Tm (KED) | 0.003 ppb             | 727 cps           |               |
| 174Yb (KED) | 0.020 ppb             | 1,747 cps         |               |
| 175Lu (KED) | 0.003 ppb             | 380 cps           |               |
| 205Tl (KED) | 0.011 ppb             | 1,957 cps         |               |
| 208Pb (KED) | 1.161 ppb             | 147,063 cps       |               |
| 232Th (KED) | 0.136 ppb             | 32,567 cps        |               |
| 238U (KED)  | 0.026 ppb             | 7,739 cps         |               |

## Sample Summary

Instrument ID: iCAP Q

Analysis index: 10

Analysis name: 1602611jian

Analysis started at: 8/26/2021 5:21:52 PM

User name: WINDOWS-UPCI4ER\Administrator

| Category    | Concentration average | Concentration RSD |
|-------------|-----------------------|-------------------|
| 9Be (KED)   | 0.000 ppb             |                   |
| 11B (KED)   | 7.808 ppb             |                   |
| 23Na (KED)  | 1,970.476 ppb         |                   |
| 24Mg (KED)  | 786.555 ppb           |                   |
| 27Al (KED)  | 664.628 ppb           |                   |
| 39K (KED)   | 5,984.264 ppb         |                   |
| 40Ca (KED)  | 893.370 ppb           |                   |
| 51V (KED)   | 1.207 ppb             |                   |
| 52Cr (KED)  | 2.264 ppb             |                   |
| 55Mn (KED)  | 18.644 ppb            |                   |
| 56Fe (KED)  | 570.361 ppb           |                   |
| 58Ni (KED)  | 2.961 ppb             |                   |
| 59Co (KED)  | 0.282 ppb             |                   |
| 63Cu (KED)  | 11.069 ppb            |                   |
| 64Zn (KED)  | 223.464 ppb           |                   |
| 69Ga (KED)  | 2.900 ppb             |                   |
| 75As (KED)  | 0.467 ppb             |                   |
| 80Se (KED)  | 1.463 ppb             |                   |
| 85Rb (KED)  | 3.294 ppb             |                   |
| 88Sr (KED)  | 7.202 ppb             |                   |
| 107Ag (KED) | 0.243 ppb             |                   |
| 114Cd (KED) | 0.200 ppb             |                   |
| 133Cs (KED) | 0.098 ppb             |                   |
| 138Ba (KED) | 8.627 ppb             |                   |
| 139La (KED) | 0.464 ppb             |                   |
| 140Ce (KED) | 1.041 ppb             |                   |
| 141Pr (KED) | 0.118 ppb             |                   |
| 142Nd (KED) | 0.615 ppb             |                   |
| 152Sm (KED) | 0.084 ppb             |                   |
| 153Eu (KED) | 0.017 ppb             |                   |
| 158Gd (KED) | 0.084 ppb             |                   |
| 164Dy (KED) | 0.057 ppb             |                   |
| 165Ho (KED) | 0.010 ppb             |                   |
| 166Er (KED) | 0.030 ppb             |                   |
| 169Tm (KED) | 0.004 ppb             |                   |
| 174Yb (KED) | 0.025 ppb             |                   |
| 175Lu (KED) | 0.004 ppb             |                   |
| 205Tl (KED) | 0.010 ppb             |                   |
| 208Pb (KED) | 1.272 ppb             |                   |
| 232Th (KED) | 0.130 ppb             |                   |
| 238U (KED)  | 0.036 ppb             |                   |

| Category   | Concentration average | Intensity average | Intensity RSD |
|------------|-----------------------|-------------------|---------------|
| 9Be (KED)  | 0.000 ppb             | 0 cps             |               |
| 11B (KED)  | 7.808 ppb             | 530 cps           |               |
| 23Na (KED) | 1,970.476 ppb         | 2,632,774 cps     |               |
| 24Mg (KED) | 786.555 ppb           | 376,866 cps       |               |
| 27Al (KED) | 664.628 ppb           | 82,784 cps        |               |
| 39K (KED)  | 5,984.264 ppb         | 1,648,499 cps     |               |
| 40Ca (KED) | 893.370 ppb           | 66,225,686 cps    |               |

| Category    | Concentration average | Intensity average | Intensity RSD |
|-------------|-----------------------|-------------------|---------------|
| 51V (KED)   | 1.207 ppb             | 9,280 cps         |               |
| 52Cr (KED)  | 2.264 ppb             | 27,113 cps        |               |
| 55Mn (KED)  | 18.644 ppb            | 104,442 cps       |               |
| 56Fe (KED)  | 570.361 ppb           | 6,237,290 cps     |               |
| 58Ni (KED)  | 2.961 ppb             | 47,283 cps        |               |
| 59Co (KED)  | 0.282 ppb             | 6,712 cps         |               |
| 63Cu (KED)  | 11.069 ppb            | 201,180 cps       |               |
| 64Zn (KED)  | 223.464 ppb           | 978,059 cps       |               |
| 69Ga (KED)  | 2.900 ppb             | 16,277 cps        |               |
| 75As (KED)  | 0.467 ppb             | 633 cps           |               |
| 80Se (KED)  | 1.463 ppb             | 1,647 cps         |               |
| 85Rb (KED)  | 3.294 ppb             | 17,612 cps        |               |
| 88Sr (KED)  | 7.202 ppb             | 51,884 cps        |               |
| 107Ag (KED) | 0.243 ppb             | 11,882 cps        |               |
| 114Cd (KED) | 0.200 ppb             | 3,674 cps         |               |
| 133Cs (KED) | 0.098 ppb             | 2,630 cps         |               |
| 138Ba (KED) | 8.627 ppb             | 309,605 cps       |               |
| 139La (KED) | 0.464 ppb             | 33,602 cps        |               |
| 140Ce (KED) | 1.041 ppb             | 104,342 cps       |               |
| 141Pr (KED) | 0.118 ppb             | 11,669 cps        |               |
| 142Nd (KED) | 0.615 ppb             | 24,942 cps        |               |
| 152Sm (KED) | 0.084 ppb             | 3,347 cps         |               |
| 153Eu (KED) | 0.017 ppb             | 1,310 cps         |               |
| 158Gd (KED) | 0.084 ppb             | 4,524 cps         |               |
| 164Dy (KED) | 0.057 ppb             | 3,250 cps         |               |
| 165Ho (KED) | 0.010 ppb             | 2,137 cps         |               |
| 166Er (KED) | 0.030 ppb             | 2,217 cps         |               |
| 169Tm (KED) | 0.004 ppb             | 940 cps           |               |
| 174Yb (KED) | 0.025 ppb             | 2,204 cps         |               |
| 175Lu (KED) | 0.004 ppb             | 517 cps           |               |
| 205Tl (KED) | 0.010 ppb             | 1,873 cps         |               |
| 208Pb (KED) | 1.272 ppb             | 160,875 cps       |               |
| 232Th (KED) | 0.130 ppb             | 31,156 cps        |               |
| 238U (KED)  | 0.036 ppb             | 10,428 cps        |               |

## Sample Summary

Instrument ID: iCAP Q

Analysis index: 11

Analysis name: 1601422jian

Analysis started at: 8/26/2021 5:23:53 PM

User name: WINDOWS-UPCI4ER\Administrator

| Category    | Concentration average | Concentration RSD |
|-------------|-----------------------|-------------------|
| 9Be (KED)   | 0.027 ppb             |                   |
| 11B (KED)   | 8.500 ppb             |                   |
| 23Na (KED)  | 774.337 ppb           |                   |
| 24Mg (KED)  | 525.558 ppb           |                   |
| 27Al (KED)  | 461.477 ppb           |                   |
| 39K (KED)   | 4,352.396 ppb         |                   |
| 40Ca (KED)  | 893.128 ppb           |                   |
| 51V (KED)   | 0.861 ppb             |                   |
| 52Cr (KED)  | 2.808 ppb             |                   |
| 55Mn (KED)  | 15.522 ppb            |                   |
| 56Fe (KED)  | 433.861 ppb           |                   |
| 58Ni (KED)  | 2.224 ppb             |                   |
| 59Co (KED)  | 0.246 ppb             |                   |
| 63Cu (KED)  | 8.949 ppb             |                   |
| 64Zn (KED)  | 213.574 ppb           |                   |
| 69Ga (KED)  | 2.352 ppb             |                   |
| 75As (KED)  | 0.594 ppb             |                   |
| 80Se (KED)  | 2.867 ppb             |                   |
| 85Rb (KED)  | 1.801 ppb             |                   |
| 88Sr (KED)  | 5.594 ppb             |                   |
| 107Ag (KED) | 0.090 ppb             |                   |
| 114Cd (KED) | 0.443 ppb             |                   |
| 133Cs (KED) | 0.068 ppb             |                   |
| 138Ba (KED) | 7.108 ppb             |                   |
| 139La (KED) | 0.359 ppb             |                   |
| 140Ce (KED) | 0.710 ppb             |                   |
| 141Pr (KED) | 0.085 ppb             |                   |
| 142Nd (KED) | 0.483 ppb             |                   |
| 152Sm (KED) | 0.067 ppb             |                   |
| 153Eu (KED) | 0.014 ppb             |                   |
| 158Gd (KED) | 0.059 ppb             |                   |
| 164Dy (KED) | 0.043 ppb             |                   |
| 165Ho (KED) | 0.007 ppb             |                   |
| 166Er (KED) | 0.021 ppb             |                   |
| 169Tm (KED) | 0.003 ppb             |                   |
| 174Yb (KED) | 0.016 ppb             |                   |
| 175Lu (KED) | 0.002 ppb             |                   |
| 205Tl (KED) | 0.012 ppb             |                   |
| 208Pb (KED) | 1.094 ppb             |                   |
| 232Th (KED) | 0.099 ppb             |                   |
| 238U (KED)  | 0.022 ppb             |                   |

| Category   | Concentration average | Intensity average | Intensity RSD |
|------------|-----------------------|-------------------|---------------|
| 9Be (KED)  | 0.027 ppb             | 3 cps             |               |
| 11B (KED)  | 8.500 ppb             | 577 cps           |               |
| 23Na (KED) | 774.337 ppb           | 1,063,245 cps     |               |
| 24Mg (KED) | 525.558 ppb           | 251,936 cps       |               |
| 27Al (KED) | 461.477 ppb           | 57,492 cps        |               |
| 39K (KED)  | 4,352.396 ppb         | 1,201,570 cps     |               |
| 40Ca (KED) | 893.128 ppb           | 66,219,416 cps    |               |

| Category    | Concentration average | Intensity average | Intensity RSD |
|-------------|-----------------------|-------------------|---------------|
| 51V (KED)   | 0.861 ppb             | 6,618 cps         |               |
| 52Cr (KED)  | 2.808 ppb             | 33,605 cps        |               |
| 55Mn (KED)  | 15.522 ppb            | 86,969 cps        |               |
| 56Fe (KED)  | 433.861 ppb           | 4,745,357 cps     |               |
| 58Ni (KED)  | 2.224 ppb             | 36,453 cps        |               |
| 59Co (KED)  | 0.246 ppb             | 5,865 cps         |               |
| 63Cu (KED)  | 8.949 ppb             | 162,987 cps       |               |
| 64Zn (KED)  | 213.574 ppb           | 934,843 cps       |               |
| 69Ga (KED)  | 2.352 ppb             | 13,217 cps        |               |
| 75As (KED)  | 0.594 ppb             | 800 cps           |               |
| 80Se (KED)  | 2.867 ppb             | 2,204 cps         |               |
| 85Rb (KED)  | 1.801 ppb             | 9,677 cps         |               |
| 88Sr (KED)  | 5.594 ppb             | 40,332 cps        |               |
| 107Ag (KED) | 0.090 ppb             | 4,461 cps         |               |
| 114Cd (KED) | 0.443 ppb             | 8,133 cps         |               |
| 133Cs (KED) | 0.068 ppb             | 1,820 cps         |               |
| 138Ba (KED) | 7.108 ppb             | 255,378 cps       |               |
| 139La (KED) | 0.359 ppb             | 26,001 cps        |               |
| 140Ce (KED) | 0.710 ppb             | 71,270 cps        |               |
| 141Pr (KED) | 0.085 ppb             | 8,373 cps         |               |
| 142Nd (KED) | 0.483 ppb             | 19,595 cps        |               |
| 152Sm (KED) | 0.067 ppb             | 2,647 cps         |               |
| 153Eu (KED) | 0.014 ppb             | 1,100 cps         |               |
| 158Gd (KED) | 0.059 ppb             | 3,170 cps         |               |
| 164Dy (KED) | 0.043 ppb             | 2,470 cps         |               |
| 165Ho (KED) | 0.007 ppb             | 1,540 cps         |               |
| 166Er (KED) | 0.021 ppb             | 1,543 cps         |               |
| 169Tm (KED) | 0.003 ppb             | 803 cps           |               |
| 174Yb (KED) | 0.016 ppb             | 1,463 cps         |               |
| 175Lu (KED) | 0.002 ppb             | 337 cps           |               |
| 205Tl (KED) | 0.012 ppb             | 2,090 cps         |               |
| 208Pb (KED) | 1.094 ppb             | 138,718 cps       |               |
| 232Th (KED) | 0.099 ppb             | 23,693 cps        |               |
| 238U (KED)  | 0.022 ppb             | 6,468 cps         |               |

## Sample Summary

Instrument ID: iCAP Q

Analysis index: 12

Analysis name: 1601242jian

Analysis started at: 8/26/2021 5:25:59 PM

User name: WINDOWS-UPCI4ER\Administrator

| Category    | Concentration average | Concentration RSD |
|-------------|-----------------------|-------------------|
| 9Be (KED)   | 0.027 ppb             |                   |
| 11B (KED)   | 3.706 ppb             |                   |
| 23Na (KED)  | 728.587 ppb           |                   |
| 24Mg (KED)  | 582.094 ppb           |                   |
| 27Al (KED)  | 410.063 ppb           |                   |
| 39K (KED)   | 4,516.461 ppb         |                   |
| 40Ca (KED)  | 617.292 ppb           |                   |
| 51V (KED)   | 0.808 ppb             |                   |
| 52Cr (KED)  | 1.686 ppb             |                   |
| 55Mn (KED)  | 16.147 ppb            |                   |
| 56Fe (KED)  | 421.506 ppb           |                   |
| 58Ni (KED)  | 2.077 ppb             |                   |
| 59Co (KED)  | 0.237 ppb             |                   |
| 63Cu (KED)  | 8.084 ppb             |                   |
| 64Zn (KED)  | 211.788 ppb           |                   |
| 69Ga (KED)  | 2.290 ppb             |                   |
| 75As (KED)  | 0.632 ppb             |                   |
| 80Se (KED)  | 1.454 ppb             |                   |
| 85Rb (KED)  | 1.946 ppb             |                   |
| 88Sr (KED)  | 6.257 ppb             |                   |
| 107Ag (KED) | 0.072 ppb             |                   |
| 114Cd (KED) | 0.226 ppb             |                   |
| 133Cs (KED) | 0.066 ppb             |                   |
| 138Ba (KED) | 7.277 ppb             |                   |
| 139La (KED) | 0.368 ppb             |                   |
| 140Ce (KED) | 0.752 ppb             |                   |
| 141Pr (KED) | 0.093 ppb             |                   |
| 142Nd (KED) | 0.474 ppb             |                   |
| 152Sm (KED) | 0.067 ppb             |                   |
| 153Eu (KED) | 0.014 ppb             |                   |
| 158Gd (KED) | 0.057 ppb             |                   |
| 164Dy (KED) | 0.041 ppb             |                   |
| 165Ho (KED) | 0.008 ppb             |                   |
| 166Er (KED) | 0.025 ppb             |                   |
| 169Tm (KED) | 0.003 ppb             |                   |
| 174Yb (KED) | 0.016 ppb             |                   |
| 175Lu (KED) | 0.003 ppb             |                   |
| 205Tl (KED) | 0.011 ppb             |                   |
| 208Pb (KED) | 0.903 ppb             |                   |
| 232Th (KED) | 0.098 ppb             |                   |
| 238U (KED)  | 0.020 ppb             |                   |

| Category   | Concentration average | Intensity average | Intensity RSD |
|------------|-----------------------|-------------------|---------------|
| 9Be (KED)  | 0.027 ppb             | 3 cps             |               |
| 11B (KED)  | 3.706 ppb             | 253 cps           |               |
| 23Na (KED) | 728.587 ppb           | 1,003,214 cps     |               |
| 24Mg (KED) | 582.094 ppb           | 278,998 cps       |               |
| 27Al (KED) | 410.063 ppb           | 51,091 cps        |               |
| 39K (KED)  | 4,516.461 ppb         | 1,246,503 cps     |               |
| 40Ca (KED) | 617.292 ppb           | 59,080,604 cps    |               |

| Category    | Concentration average | Intensity average | Intensity RSD |
|-------------|-----------------------|-------------------|---------------|
| 51V (KED)   | 0.808 ppb             | 6,212 cps         |               |
| 52Cr (KED)  | 1.686 ppb             | 20,214 cps        |               |
| 55Mn (KED)  | 16.147 ppb            | 90,467 cps        |               |
| 56Fe (KED)  | 421.506 ppb           | 4,610,319 cps     |               |
| 58Ni (KED)  | 2.077 ppb             | 34,297 cps        |               |
| 59Co (KED)  | 0.237 ppb             | 5,648 cps         |               |
| 63Cu (KED)  | 8.084 ppb             | 147,401 cps       |               |
| 64Zn (KED)  | 211.788 ppb           | 927,039 cps       |               |
| 69Ga (KED)  | 2.290 ppb             | 12,870 cps        |               |
| 75As (KED)  | 0.632 ppb             | 850 cps           |               |
| 80Se (KED)  | 1.454 ppb             | 1,643 cps         |               |
| 85Rb (KED)  | 1.946 ppb             | 10,444 cps        |               |
| 88Sr (KED)  | 6.257 ppb             | 45,098 cps        |               |
| 107Ag (KED) | 0.072 ppb             | 3,567 cps         |               |
| 114Cd (KED) | 0.226 ppb             | 4,161 cps         |               |
| 133Cs (KED) | 0.066 ppb             | 1,773 cps         |               |
| 138Ba (KED) | 7.277 ppb             | 261,401 cps       |               |
| 139La (KED) | 0.368 ppb             | 26,645 cps        |               |
| 140Ce (KED) | 0.752 ppb             | 75,398 cps        |               |
| 141Pr (KED) | 0.093 ppb             | 9,167 cps         |               |
| 142Nd (KED) | 0.474 ppb             | 19,195 cps        |               |
| 152Sm (KED) | 0.067 ppb             | 2,664 cps         |               |
| 153Eu (KED) | 0.014 ppb             | 1,063 cps         |               |
| 158Gd (KED) | 0.057 ppb             | 3,037 cps         |               |
| 164Dy (KED) | 0.041 ppb             | 2,370 cps         |               |
| 165Ho (KED) | 0.008 ppb             | 1,653 cps         |               |
| 166Er (KED) | 0.025 ppb             | 1,853 cps         |               |
| 169Tm (KED) | 0.003 ppb             | 697 cps           |               |
| 174Yb (KED) | 0.016 ppb             | 1,410 cps         |               |
| 175Lu (KED) | 0.003 ppb             | 373 cps           |               |
| 205Tl (KED) | 0.011 ppb             | 2,040 cps         |               |
| 208Pb (KED) | 0.903 ppb             | 115,090 cps       |               |
| 232Th (KED) | 0.098 ppb             | 23,640 cps        |               |
| 238U (KED)  | 0.020 ppb             | 5,848 cps         |               |

## Sample Summary

Instrument ID: iCAP Q

Analysis index: 13

Analysis name: 1602168jian

Analysis started at: 8/26/2021 5:28:04 PM

User name: WINDOWS-UPCI4ER\Administrator

| Category    | Concentration average | Concentration RSD |
|-------------|-----------------------|-------------------|
| 9Be (KED)   | 0.000 ppb             |                   |
| 11B (KED)   | 4.448 ppb             |                   |
| 23Na (KED)  | 759.527 ppb           |                   |
| 24Mg (KED)  | 460.777 ppb           |                   |
| 27Al (KED)  | 335.807 ppb           |                   |
| 39K (KED)   | 4,456.596 ppb         |                   |
| 40Ca (KED)  | 332.573 ppb           |                   |
| 51V (KED)   | 0.590 ppb             |                   |
| 52Cr (KED)  | 2.637 ppb             |                   |
| 55Mn (KED)  | 10.124 ppb            |                   |
| 56Fe (KED)  | 325.518 ppb           |                   |
| 58Ni (KED)  | 1.715 ppb             |                   |
| 59Co (KED)  | 0.154 ppb             |                   |
| 63Cu (KED)  | 6.946 ppb             |                   |
| 64Zn (KED)  | 214.484 ppb           |                   |
| 69Ga (KED)  | 1.781 ppb             |                   |
| 75As (KED)  | 0.520 ppb             |                   |
| 80Se (KED)  | 1.715 ppb             |                   |
| 85Rb (KED)  | 1.642 ppb             |                   |
| 88Sr (KED)  | 5.031 ppb             |                   |
| 107Ag (KED) | 0.070 ppb             |                   |
| 114Cd (KED) | 0.298 ppb             |                   |
| 133Cs (KED) | 0.051 ppb             |                   |
| 138Ba (KED) | 6.263 ppb             |                   |
| 139La (KED) | 0.283 ppb             |                   |
| 140Ce (KED) | 0.595 ppb             |                   |
| 141Pr (KED) | 0.063 ppb             |                   |
| 142Nd (KED) | 0.374 ppb             |                   |
| 152Sm (KED) | 0.045 ppb             |                   |
| 153Eu (KED) | 0.012 ppb             |                   |
| 158Gd (KED) | 0.042 ppb             |                   |
| 164Dy (KED) | 0.031 ppb             |                   |
| 165Ho (KED) | 0.005 ppb             |                   |
| 166Er (KED) | 0.017 ppb             |                   |
| 169Tm (KED) | 0.002 ppb             |                   |
| 174Yb (KED) | 0.012 ppb             |                   |
| 175Lu (KED) | 0.004 ppb             |                   |
| 205Tl (KED) | 0.007 ppb             |                   |
| 208Pb (KED) | 0.956 ppb             |                   |
| 232Th (KED) | 0.076 ppb             |                   |
| 238U (KED)  | 0.017 ppb             |                   |

| Category   | Concentration average | Intensity average | Intensity RSD |
|------------|-----------------------|-------------------|---------------|
| 9Be (KED)  | 0.000 ppb             | 0 cps             |               |
| 11B (KED)  | 4.448 ppb             | 303 cps           |               |
| 23Na (KED) | 759.527 ppb           | 1,043,812 cps     |               |
| 24Mg (KED) | 460.777 ppb           | 220,928 cps       |               |
| 27Al (KED) | 335.807 ppb           | 41,847 cps        |               |
| 39K (KED)  | 4,456.596 ppb         | 1,230,107 cps     |               |
| 40Ca (KED) | 332.573 ppb           | 51,711,918 cps    |               |

| Category    | Concentration average | Intensity average | Intensity RSD |
|-------------|-----------------------|-------------------|---------------|
| 51V (KED)   | 0.590 ppb             | 4,541 cps         |               |
| 52Cr (KED)  | 2.637 ppb             | 31,563 cps        |               |
| 55Mn (KED)  | 10.124 ppb            | 56,765 cps        |               |
| 56Fe (KED)  | 325.518 ppb           | 3,561,189 cps     |               |
| 58Ni (KED)  | 1.715 ppb             | 28,987 cps        |               |
| 59Co (KED)  | 0.154 ppb             | 3,684 cps         |               |
| 63Cu (KED)  | 6.946 ppb             | 126,888 cps       |               |
| 64Zn (KED)  | 214.484 ppb           | 938,820 cps       |               |
| 69Ga (KED)  | 1.781 ppb             | 10,027 cps        |               |
| 75As (KED)  | 0.520 ppb             | 703 cps           |               |
| 80Se (KED)  | 1.715 ppb             | 1,747 cps         |               |
| 85Rb (KED)  | 1.642 ppb             | 8,826 cps         |               |
| 88Sr (KED)  | 5.031 ppb             | 36,293 cps        |               |
| 107Ag (KED) | 0.070 ppb             | 3,500 cps         |               |
| 114Cd (KED) | 0.298 ppb             | 5,468 cps         |               |
| 133Cs (KED) | 0.051 ppb             | 1,387 cps         |               |
| 138Ba (KED) | 6.263 ppb             | 225,243 cps       |               |
| 139La (KED) | 0.283 ppb             | 20,547 cps        |               |
| 140Ce (KED) | 0.595 ppb             | 59,662 cps        |               |
| 141Pr (KED) | 0.063 ppb             | 6,272 cps         |               |
| 142Nd (KED) | 0.374 ppb             | 15,173 cps        |               |
| 152Sm (KED) | 0.045 ppb             | 1,780 cps         |               |
| 153Eu (KED) | 0.012 ppb             | 890 cps           |               |
| 158Gd (KED) | 0.042 ppb             | 2,274 cps         |               |
| 164Dy (KED) | 0.031 ppb             | 1,780 cps         |               |
| 165Ho (KED) | 0.005 ppb             | 1,057 cps         |               |
| 166Er (KED) | 0.017 ppb             | 1,237 cps         |               |
| 169Tm (KED) | 0.002 ppb             | 443 cps           |               |
| 174Yb (KED) | 0.012 ppb             | 1,107 cps         |               |
| 175Lu (KED) | 0.004 ppb             | 587 cps           |               |
| 205Tl (KED) | 0.007 ppb             | 1,340 cps         |               |
| 208Pb (KED) | 0.956 ppb             | 121,670 cps       |               |
| 232Th (KED) | 0.076 ppb             | 18,290 cps        |               |
| 238U (KED)  | 0.017 ppb             | 5,094 cps         |               |

## Sample Summary

Instrument ID: iCAP Q

Analysis index: 14

Analysis name: 1602088jian

Analysis started at: 8/26/2021 5:30:04 PM

User name: WINDOWS-UPCI4ER\Administrator

| Category    | Concentration average | Concentration RSD |
|-------------|-----------------------|-------------------|
| 9Be (KED)   | 0.027 ppb             |                   |
| 11B (KED)   | 3.855 ppb             |                   |
| 23Na (KED)  | 572.405 ppb           |                   |
| 24Mg (KED)  | 335.589 ppb           |                   |
| 27Al (KED)  | 293.239 ppb           |                   |
| 39K (KED)   | 3,567.787 ppb         |                   |
| 40Ca (KED)  | 418.964 ppb           |                   |
| 51V (KED)   | 0.447 ppb             |                   |
| 52Cr (KED)  | 1.178 ppb             |                   |
| 55Mn (KED)  | 8.892 ppb             |                   |
| 56Fe (KED)  | 256.445 ppb           |                   |
| 58Ni (KED)  | 1.110 ppb             |                   |
| 59Co (KED)  | 0.132 ppb             |                   |
| 63Cu (KED)  | 5.386 ppb             |                   |
| 64Zn (KED)  | 198.715 ppb           |                   |
| 69Ga (KED)  | 1.373 ppb             |                   |
| 75As (KED)  | 0.520 ppb             |                   |
| 80Se (KED)  | 1.976 ppb             |                   |
| 85Rb (KED)  | 1.522 ppb             |                   |
| 88Sr (KED)  | 3.512 ppb             |                   |
| 107Ag (KED) | 0.069 ppb             |                   |
| 114Cd (KED) | 0.310 ppb             |                   |
| 133Cs (KED) | 0.046 ppb             |                   |
| 138Ba (KED) | 4.695 ppb             |                   |
| 139La (KED) | 0.205 ppb             |                   |
| 140Ce (KED) | 0.426 ppb             |                   |
| 141Pr (KED) | 0.053 ppb             |                   |
| 142Nd (KED) | 0.295 ppb             |                   |
| 152Sm (KED) | 0.042 ppb             |                   |
| 153Eu (KED) | 0.009 ppb             |                   |
| 158Gd (KED) | 0.041 ppb             |                   |
| 164Dy (KED) | 0.027 ppb             |                   |
| 165Ho (KED) | 0.005 ppb             |                   |
| 166Er (KED) | 0.015 ppb             |                   |
| 169Tm (KED) | 0.002 ppb             |                   |
| 174Yb (KED) | 0.010 ppb             |                   |
| 175Lu (KED) | 0.002 ppb             |                   |
| 205Tl (KED) | 0.011 ppb             |                   |
| 208Pb (KED) | 0.696 ppb             |                   |
| 232Th (KED) | 0.069 ppb             |                   |
| 238U (KED)  | 0.016 ppb             |                   |

| Category   | Concentration average | Intensity average | Intensity RSD |
|------------|-----------------------|-------------------|---------------|
| 9Be (KED)  | 0.027 ppb             | 3 cps             |               |
| 11B (KED)  | 3.855 ppb             | 263 cps           |               |
| 23Na (KED) | 572.405 ppb           | 798,277 cps       |               |
| 24Mg (KED) | 335.589 ppb           | 161,005 cps       |               |
| 27Al (KED) | 293.239 ppb           | 36,547 cps        |               |
| 39K (KED)  | 3,567.787 ppb         | 986,684 cps       |               |
| 40Ca (KED) | 418.964 ppb           | 53,947,756 cps    |               |

| Category    | Concentration average | Intensity average | Intensity RSD |
|-------------|-----------------------|-------------------|---------------|
| 51V (KED)   | 0.447 ppb             | 3,447 cps         |               |
| 52Cr (KED)  | 1.178 ppb             | 14,151 cps        |               |
| 55Mn (KED)  | 8.892 ppb             | 49,873 cps        |               |
| 56Fe (KED)  | 256.445 ppb           | 2,806,229 cps     |               |
| 58Ni (KED)  | 1.110 ppb             | 20,093 cps        |               |
| 59Co (KED)  | 0.132 ppb             | 3,140 cps         |               |
| 63Cu (KED)  | 5.386 ppb             | 98,783 cps        |               |
| 64Zn (KED)  | 198.715 ppb           | 869,914 cps       |               |
| 69Ga (KED)  | 1.373 ppb             | 7,749 cps         |               |
| 75As (KED)  | 0.520 ppb             | 703 cps           |               |
| 80Se (KED)  | 1.976 ppb             | 1,850 cps         |               |
| 85Rb (KED)  | 1.522 ppb             | 8,189 cps         |               |
| 88Sr (KED)  | 3.512 ppb             | 25,379 cps        |               |
| 107Ag (KED) | 0.069 ppb             | 3,430 cps         |               |
| 114Cd (KED) | 0.310 ppb             | 5,685 cps         |               |
| 133Cs (KED) | 0.046 ppb             | 1,243 cps         |               |
| 138Ba (KED) | 4.695 ppb             | 169,277 cps       |               |
| 139La (KED) | 0.205 ppb             | 14,886 cps        |               |
| 140Ce (KED) | 0.426 ppb             | 42,813 cps        |               |
| 141Pr (KED) | 0.053 ppb             | 5,221 cps         |               |
| 142Nd (KED) | 0.295 ppb             | 11,952 cps        |               |
| 152Sm (KED) | 0.042 ppb             | 1,680 cps         |               |
| 153Eu (KED) | 0.009 ppb             | 670 cps           |               |
| 158Gd (KED) | 0.041 ppb             | 2,200 cps         |               |
| 164Dy (KED) | 0.027 ppb             | 1,547 cps         |               |
| 165Ho (KED) | 0.005 ppb             | 1,133 cps         |               |
| 166Er (KED) | 0.015 ppb             | 1,117 cps         |               |
| 169Tm (KED) | 0.002 ppb             | 440 cps           |               |
| 174Yb (KED) | 0.010 ppb             | 920 cps           |               |
| 175Lu (KED) | 0.002 ppb             | 207 cps           |               |
| 205Tl (KED) | 0.011 ppb             | 2,047 cps         |               |
| 208Pb (KED) | 0.696 ppb             | 89,400 cps        |               |
| 232Th (KED) | 0.069 ppb             | 16,681 cps        |               |
| 238U (KED)  | 0.016 ppb             | 4,694 cps         |               |

## Sample Summary

Instrument ID: iCAP Q

Analysis index: 15

Analysis name: 1603041jian

Analysis started at: 8/26/2021 5:32:03 PM

User name: WINDOWS-UPCI4ER\Administrator

| Category    | Concentration average | Concentration RSD |
|-------------|-----------------------|-------------------|
| 9Be (KED)   | 0.027 ppb             |                   |
| 11B (KED)   | 4.744 ppb             |                   |
| 23Na (KED)  | 1,331.071 ppb         |                   |
| 24Mg (KED)  | 654.479 ppb           |                   |
| 27Al (KED)  | 507.698 ppb           |                   |
| 39K (KED)   | 5,982.251 ppb         |                   |
| 40Ca (KED)  | 319.672 ppb           |                   |
| 51V (KED)   | 0.932 ppb             |                   |
| 52Cr (KED)  | 1.667 ppb             |                   |
| 55Mn (KED)  | 16.058 ppb            |                   |
| 56Fe (KED)  | 440.270 ppb           |                   |
| 58Ni (KED)  | 2.106 ppb             |                   |
| 59Co (KED)  | 0.236 ppb             |                   |
| 63Cu (KED)  | 7.873 ppb             |                   |
| 64Zn (KED)  | 206.692 ppb           |                   |
| 69Ga (KED)  | 2.676 ppb             |                   |
| 75As (KED)  | 0.564 ppb             |                   |
| 80Se (KED)  | 1.412 ppb             |                   |
| 85Rb (KED)  | 2.503 ppb             |                   |
| 88Sr (KED)  | 6.304 ppb             |                   |
| 107Ag (KED) | 0.156 ppb             |                   |
| 114Cd (KED) | 0.320 ppb             |                   |
| 133Cs (KED) | 0.091 ppb             |                   |
| 138Ba (KED) | 9.922 ppb             |                   |
| 139La (KED) | 0.397 ppb             |                   |
| 140Ce (KED) | 0.807 ppb             |                   |
| 141Pr (KED) | 0.097 ppb             |                   |
| 142Nd (KED) | 0.524 ppb             |                   |
| 152Sm (KED) | 0.079 ppb             |                   |
| 153Eu (KED) | 0.017 ppb             |                   |
| 158Gd (KED) | 0.071 ppb             |                   |
| 164Dy (KED) | 0.050 ppb             |                   |
| 165Ho (KED) | 0.009 ppb             |                   |
| 166Er (KED) | 0.028 ppb             |                   |
| 169Tm (KED) | 0.004 ppb             |                   |
| 174Yb (KED) | 0.019 ppb             |                   |
| 175Lu (KED) | 0.003 ppb             |                   |
| 205Tl (KED) | 0.013 ppb             |                   |
| 208Pb (KED) | 1.090 ppb             |                   |
| 232Th (KED) | 0.108 ppb             |                   |
| 238U (KED)  | 0.029 ppb             |                   |

| Category   | Concentration average | Intensity average | Intensity RSD |
|------------|-----------------------|-------------------|---------------|
| 9Be (KED)  | 0.027 ppb             | 3 cps             |               |
| 11B (KED)  | 4.744 ppb             | 323 cps           |               |
| 23Na (KED) | 1,331.071 ppb         | 1,793,771 cps     |               |
| 24Mg (KED) | 654.479 ppb           | 313,646 cps       |               |
| 27Al (KED) | 507.698 ppb           | 63,246 cps        |               |
| 39K (KED)  | 5,982.251 ppb         | 1,647,947 cps     |               |
| 40Ca (KED) | 319.672 ppb           | 51,378,042 cps    |               |

| Category    | Concentration average | Intensity average | Intensity RSD |
|-------------|-----------------------|-------------------|---------------|
| 51V (KED)   | 0.932 ppb             | 7,165 cps         |               |
| 52Cr (KED)  | 1.667 ppb             | 19,989 cps        |               |
| 55Mn (KED)  | 16.058 ppb            | 89,970 cps        |               |
| 56Fe (KED)  | 440.270 ppb           | 4,815,405 cps     |               |
| 58Ni (KED)  | 2.106 ppb             | 34,718 cps        |               |
| 59Co (KED)  | 0.236 ppb             | 5,611 cps         |               |
| 63Cu (KED)  | 7.873 ppb             | 143,599 cps       |               |
| 64Zn (KED)  | 206.692 ppb           | 904,773 cps       |               |
| 69Ga (KED)  | 2.676 ppb             | 15,026 cps        |               |
| 75As (KED)  | 0.564 ppb             | 760 cps           |               |
| 80Se (KED)  | 1.412 ppb             | 1,627 cps         |               |
| 85Rb (KED)  | 2.503 ppb             | 13,407 cps        |               |
| 88Sr (KED)  | 6.304 ppb             | 45,432 cps        |               |
| 107Ag (KED) | 0.156 ppb             | 7,679 cps         |               |
| 114Cd (KED) | 0.320 ppb             | 5,871 cps         |               |
| 133Cs (KED) | 0.091 ppb             | 2,430 cps         |               |
| 138Ba (KED) | 9.922 ppb             | 355,789 cps       |               |
| 139La (KED) | 0.397 ppb             | 28,750 cps        |               |
| 140Ce (KED) | 0.807 ppb             | 80,965 cps        |               |
| 141Pr (KED) | 0.097 ppb             | 9,594 cps         |               |
| 142Nd (KED) | 0.524 ppb             | 21,225 cps        |               |
| 152Sm (KED) | 0.079 ppb             | 3,144 cps         |               |
| 153Eu (KED) | 0.017 ppb             | 1,283 cps         |               |
| 158Gd (KED) | 0.071 ppb             | 3,814 cps         |               |
| 164Dy (KED) | 0.050 ppb             | 2,880 cps         |               |
| 165Ho (KED) | 0.009 ppb             | 1,827 cps         |               |
| 166Er (KED) | 0.028 ppb             | 2,084 cps         |               |
| 169Tm (KED) | 0.004 ppb             | 877 cps           |               |
| 174Yb (KED) | 0.019 ppb             | 1,677 cps         |               |
| 175Lu (KED) | 0.003 ppb             | 383 cps           |               |
| 205Tl (KED) | 0.013 ppb             | 2,427 cps         |               |
| 208Pb (KED) | 1.090 ppb             | 138,222 cps       |               |
| 232Th (KED) | 0.108 ppb             | 25,907 cps        |               |
| 238U (KED)  | 0.029 ppb             | 8,436 cps         |               |

## Sample Summary

Instrument ID: iCAP Q

Analysis index: 16

Analysis name: 1602166jian

Analysis started at: 8/26/2021 5:34:06 PM

User name: WINDOWS-UPCI4ER\Administrator

| Category    | Concentration average | Concentration RSD |
|-------------|-----------------------|-------------------|
| 9Be (KED)   | 0.027 ppb             |                   |
| 11B (KED)   | 7.858 ppb             |                   |
| 23Na (KED)  | 1,150.419 ppb         |                   |
| 24Mg (KED)  | 452.486 ppb           |                   |
| 27Al (KED)  | 311.096 ppb           |                   |
| 39K (KED)   | 9,011.801 ppb         |                   |
| 40Ca (KED)  | 391.891 ppb           |                   |
| 51V (KED)   | 0.575 ppb             |                   |
| 52Cr (KED)  | 2.046 ppb             |                   |
| 55Mn (KED)  | 9.174 ppb             |                   |
| 56Fe (KED)  | 303.815 ppb           |                   |
| 58Ni (KED)  | 1.374 ppb             |                   |
| 59Co (KED)  | 0.148 ppb             |                   |
| 63Cu (KED)  | 6.465 ppb             |                   |
| 64Zn (KED)  | 208.293 ppb           |                   |
| 69Ga (KED)  | 1.424 ppb             |                   |
| 75As (KED)  | 0.515 ppb             |                   |
| 80Se (KED)  | 1.631 ppb             |                   |
| 85Rb (KED)  | 3.710 ppb             |                   |
| 88Sr (KED)  | 4.809 ppb             |                   |
| 107Ag (KED) | 0.091 ppb             |                   |
| 114Cd (KED) | 0.330 ppb             |                   |
| 133Cs (KED) | 0.056 ppb             |                   |
| 138Ba (KED) | 5.250 ppb             |                   |
| 139La (KED) | 0.384 ppb             |                   |
| 140Ce (KED) | 0.749 ppb             |                   |
| 141Pr (KED) | 0.091 ppb             |                   |
| 142Nd (KED) | 0.480 ppb             |                   |
| 152Sm (KED) | 0.060 ppb             |                   |
| 153Eu (KED) | 0.013 ppb             |                   |
| 158Gd (KED) | 0.061 ppb             |                   |
| 164Dy (KED) | 0.039 ppb             |                   |
| 165Ho (KED) | 0.006 ppb             |                   |
| 166Er (KED) | 0.020 ppb             |                   |
| 169Tm (KED) | 0.003 ppb             |                   |
| 174Yb (KED) | 0.013 ppb             |                   |
| 175Lu (KED) | 0.002 ppb             |                   |
| 205Tl (KED) | 0.010 ppb             |                   |
| 208Pb (KED) | 0.808 ppb             |                   |
| 232Th (KED) | 0.102 ppb             |                   |
| 238U (KED)  | 0.021 ppb             |                   |

| Category   | Concentration average | Intensity average | Intensity RSD |
|------------|-----------------------|-------------------|---------------|
| 9Be (KED)  | 0.027 ppb             | 3 cps             |               |
| 11B (KED)  | 7.858 ppb             | 533 cps           |               |
| 23Na (KED) | 1,150.419 ppb         | 1,556,726 cps     |               |
| 24Mg (KED) | 452.486 ppb           | 216,959 cps       |               |
| 27Al (KED) | 311.096 ppb           | 38,770 cps        |               |
| 39K (KED)  | 9,011.801 ppb         | 2,477,668 cps     |               |
| 40Ca (KED) | 391.891 ppb           | 53,247,105 cps    |               |

| Category    | Concentration average | Intensity average | Intensity RSD |
|-------------|-----------------------|-------------------|---------------|
| 51V (KED)   | 0.575 ppb             | 4,424 cps         |               |
| 52Cr (KED)  | 2.046 ppb             | 24,507 cps        |               |
| 55Mn (KED)  | 9.174 ppb             | 51,446 cps        |               |
| 56Fe (KED)  | 303.815 ppb           | 3,323,973 cps     |               |
| 58Ni (KED)  | 1.374 ppb             | 23,980 cps        |               |
| 59Co (KED)  | 0.148 ppb             | 3,534 cps         |               |
| 63Cu (KED)  | 6.465 ppb             | 118,227 cps       |               |
| 64Zn (KED)  | 208.293 ppb           | 911,769 cps       |               |
| 69Ga (KED)  | 1.424 ppb             | 8,033 cps         |               |
| 75As (KED)  | 0.515 ppb             | 697 cps           |               |
| 80Se (KED)  | 1.631 ppb             | 1,713 cps         |               |
| 85Rb (KED)  | 3.710 ppb             | 19,829 cps        |               |
| 88Sr (KED)  | 4.809 ppb             | 34,695 cps        |               |
| 107Ag (KED) | 0.091 ppb             | 4,497 cps         |               |
| 114Cd (KED) | 0.330 ppb             | 6,055 cps         |               |
| 133Cs (KED) | 0.056 ppb             | 1,507 cps         |               |
| 138Ba (KED) | 5.250 ppb             | 189,089 cps       |               |
| 139La (KED) | 0.384 ppb             | 27,828 cps        |               |
| 140Ce (KED) | 0.749 ppb             | 75,113 cps        |               |
| 141Pr (KED) | 0.091 ppb             | 9,020 cps         |               |
| 142Nd (KED) | 0.480 ppb             | 19,472 cps        |               |
| 152Sm (KED) | 0.060 ppb             | 2,400 cps         |               |
| 153Eu (KED) | 0.013 ppb             | 1,007 cps         |               |
| 158Gd (KED) | 0.061 ppb             | 3,254 cps         |               |
| 164Dy (KED) | 0.039 ppb             | 2,210 cps         |               |
| 165Ho (KED) | 0.006 ppb             | 1,353 cps         |               |
| 166Er (KED) | 0.020 ppb             | 1,487 cps         |               |
| 169Tm (KED) | 0.003 ppb             | 627 cps           |               |
| 174Yb (KED) | 0.013 ppb             | 1,117 cps         |               |
| 175Lu (KED) | 0.002 ppb             | 297 cps           |               |
| 205Tl (KED) | 0.010 ppb             | 1,833 cps         |               |
| 208Pb (KED) | 0.808 ppb             | 103,333 cps       |               |
| 232Th (KED) | 0.102 ppb             | 24,621 cps        |               |
| 238U (KED)  | 0.021 ppb             | 6,255 cps         |               |

## Sample Summary

Instrument ID: iCAP Q

Analysis index: 17

Analysis name: 1602152jian

Analysis started at: 8/26/2021 5:36:12 PM

User name: WINDOWS-UPCI4ER\Administrator

| Category    | Concentration average | Concentration RSD |
|-------------|-----------------------|-------------------|
| 9Be (KED)   | 0.027 ppb             |                   |
| 11B (KED)   | 5.090 ppb             |                   |
| 23Na (KED)  | 728.921 ppb           |                   |
| 24Mg (KED)  | 444.859 ppb           |                   |
| 27Al (KED)  | 387.453 ppb           |                   |
| 39K (KED)   | 3,385.741 ppb         |                   |
| 40Ca (KED)  | 277.327 ppb           |                   |
| 51V (KED)   | 0.709 ppb             |                   |
| 52Cr (KED)  | 1.888 ppb             |                   |
| 55Mn (KED)  | 12.351 ppb            |                   |
| 56Fe (KED)  | 359.452 ppb           |                   |
| 58Ni (KED)  | 2.554 ppb             |                   |
| 59Co (KED)  | 0.176 ppb             |                   |
| 63Cu (KED)  | 6.913 ppb             |                   |
| 64Zn (KED)  | 234.449 ppb           |                   |
| 69Ga (KED)  | 1.774 ppb             |                   |
| 75As (KED)  | 0.569 ppb             |                   |
| 80Se (KED)  | 2.547 ppb             |                   |
| 85Rb (KED)  | 1.643 ppb             |                   |
| 88Sr (KED)  | 4.786 ppb             |                   |
| 107Ag (KED) | 0.116 ppb             |                   |
| 114Cd (KED) | 0.374 ppb             |                   |
| 133Cs (KED) | 0.063 ppb             |                   |
| 138Ba (KED) | 6.506 ppb             |                   |
| 139La (KED) | 0.318 ppb             |                   |
| 140Ce (KED) | 0.663 ppb             |                   |
| 141Pr (KED) | 0.078 ppb             |                   |
| 142Nd (KED) | 0.411 ppb             |                   |
| 152Sm (KED) | 0.056 ppb             |                   |
| 153Eu (KED) | 0.013 ppb             |                   |
| 158Gd (KED) | 0.053 ppb             |                   |
| 164Dy (KED) | 0.039 ppb             |                   |
| 165Ho (KED) | 0.007 ppb             |                   |
| 166Er (KED) | 0.021 ppb             |                   |
| 169Tm (KED) | 0.003 ppb             |                   |
| 174Yb (KED) | 0.016 ppb             |                   |
| 175Lu (KED) | 0.002 ppb             |                   |
| 205Tl (KED) | 0.010 ppb             |                   |
| 208Pb (KED) | 1.227 ppb             |                   |
| 232Th (KED) | 0.086 ppb             |                   |
| 238U (KED)  | 0.021 ppb             |                   |

| Category   | Concentration average | Intensity average | Intensity RSD |
|------------|-----------------------|-------------------|---------------|
| 9Be (KED)  | 0.027 ppb             | 3 cps             |               |
| 11B (KED)  | 5.090 ppb             | 347 cps           |               |
| 23Na (KED) | 728.921 ppb           | 1,003,652 cps     |               |
| 24Mg (KED) | 444.859 ppb           | 213,309 cps       |               |
| 27Al (KED) | 387.453 ppb           | 48,276 cps        |               |
| 39K (KED)  | 3,385.741 ppb         | 936,826 cps       |               |
| 40Ca (KED) | 277.327 ppb           | 50,282,128 cps    |               |

| Category    | Concentration average | Intensity average | Intensity RSD |
|-------------|-----------------------|-------------------|---------------|
| 51V (KED)   | 0.709 ppb             | 5,458 cps         |               |
| 52Cr (KED)  | 1.888 ppb             | 22,625 cps        |               |
| 55Mn (KED)  | 12.351 ppb            | 69,225 cps        |               |
| 56Fe (KED)  | 359.452 ppb           | 3,932,076 cps     |               |
| 58Ni (KED)  | 2.554 ppb             | 41,302 cps        |               |
| 59Co (KED)  | 0.176 ppb             | 4,197 cps         |               |
| 63Cu (KED)  | 6.913 ppb             | 126,296 cps       |               |
| 64Zn (KED)  | 234.449 ppb           | 1,026,062 cps     |               |
| 69Ga (KED)  | 1.774 ppb             | 9,987 cps         |               |
| 75As (KED)  | 0.569 ppb             | 767 cps           |               |
| 80Se (KED)  | 2.547 ppb             | 2,077 cps         |               |
| 85Rb (KED)  | 1.643 ppb             | 8,833 cps         |               |
| 88Sr (KED)  | 4.786 ppb             | 34,531 cps        |               |
| 107Ag (KED) | 0.116 ppb             | 5,751 cps         |               |
| 114Cd (KED) | 0.374 ppb             | 6,869 cps         |               |
| 133Cs (KED) | 0.063 ppb             | 1,710 cps         |               |
| 138Ba (KED) | 6.506 ppb             | 233,888 cps       |               |
| 139La (KED) | 0.318 ppb             | 23,078 cps        |               |
| 140Ce (KED) | 0.663 ppb             | 66,544 cps        |               |
| 141Pr (KED) | 0.078 ppb             | 7,772 cps         |               |
| 142Nd (KED) | 0.411 ppb             | 16,671 cps        |               |
| 152Sm (KED) | 0.056 ppb             | 2,240 cps         |               |
| 153Eu (KED) | 0.013 ppb             | 993 cps           |               |
| 158Gd (KED) | 0.053 ppb             | 2,837 cps         |               |
| 164Dy (KED) | 0.039 ppb             | 2,227 cps         |               |
| 165Ho (KED) | 0.007 ppb             | 1,450 cps         |               |
| 166Er (KED) | 0.021 ppb             | 1,567 cps         |               |
| 169Tm (KED) | 0.003 ppb             | 627 cps           |               |
| 174Yb (KED) | 0.016 ppb             | 1,460 cps         |               |
| 175Lu (KED) | 0.002 ppb             | 250 cps           |               |
| 205Tl (KED) | 0.010 ppb             | 1,730 cps         |               |
| 208Pb (KED) | 1.227 ppb             | 155,232 cps       |               |
| 232Th (KED) | 0.086 ppb             | 20,787 cps        |               |
| 238U (KED)  | 0.021 ppb             | 6,212 cps         |               |

## Sample Summary

Instrument ID: iCAP Q

Analysis index: 18

Analysis name: 1602201jian

Analysis started at: 8/26/2021 5:38:13 PM

User name: WINDOWS-UPCI4ER\Administrator

| Category    | Concentration average | Concentration RSD |
|-------------|-----------------------|-------------------|
| 9Be (KED)   | 0.027 ppb             |                   |
| 11B (KED)   | 3.262 ppb             |                   |
| 23Na (KED)  | 1,609.285 ppb         |                   |
| 24Mg (KED)  | 542.000 ppb           |                   |
| 27Al (KED)  | 336.264 ppb           |                   |
| 39K (KED)   | 4,943.563 ppb         |                   |
| 40Ca (KED)  | 92.446 ppb            |                   |
| 51V (KED)   | 0.550 ppb             |                   |
| 52Cr (KED)  | 1.799 ppb             |                   |
| 55Mn (KED)  | 10.580 ppb            |                   |
| 56Fe (KED)  | 284.499 ppb           |                   |
| 58Ni (KED)  | 1.305 ppb             |                   |
| 59Co (KED)  | 6.753 ppb             |                   |
| 63Cu (KED)  | 8.448 ppb             |                   |
| 64Zn (KED)  | 231.203 ppb           |                   |
| 69Ga (KED)  | 1.553 ppb             |                   |
| 75As (KED)  | 0.497 ppb             |                   |
| 80Se (KED)  | 2.110 ppb             |                   |
| 85Rb (KED)  | 2.775 ppb             |                   |
| 88Sr (KED)  | 4.588 ppb             |                   |
| 107Ag (KED) | 0.074 ppb             |                   |
| 114Cd (KED) | 0.362 ppb             |                   |
| 133Cs (KED) | 0.056 ppb             |                   |
| 138Ba (KED) | 5.698 ppb             |                   |
| 139La (KED) | 0.257 ppb             |                   |
| 140Ce (KED) | 0.543 ppb             |                   |
| 141Pr (KED) | 0.064 ppb             |                   |
| 142Nd (KED) | 0.360 ppb             |                   |
| 152Sm (KED) | 0.048 ppb             |                   |
| 153Eu (KED) | 0.011 ppb             |                   |
| 158Gd (KED) | 0.043 ppb             |                   |
| 164Dy (KED) | 0.033 ppb             |                   |
| 165Ho (KED) | 0.006 ppb             |                   |
| 166Er (KED) | 0.018 ppb             |                   |
| 169Tm (KED) | 0.002 ppb             |                   |
| 174Yb (KED) | 0.013 ppb             |                   |
| 175Lu (KED) | 0.002 ppb             |                   |
| 205Tl (KED) | 0.009 ppb             |                   |
| 208Pb (KED) | 0.852 ppb             |                   |
| 232Th (KED) | 0.071 ppb             |                   |
| 238U (KED)  | 0.019 ppb             |                   |

| Category   | Concentration average | Intensity average | Intensity RSD |
|------------|-----------------------|-------------------|---------------|
| 9Be (KED)  | 0.027 ppb             | 3 cps             |               |
| 11B (KED)  | 3.262 ppb             | 223 cps           |               |
| 23Na (KED) | 1,609.285 ppb         | 2,158,833 cps     |               |
| 24Mg (KED) | 542.000 ppb           | 259,806 cps       |               |
| 27Al (KED) | 336.264 ppb           | 41,904 cps        |               |
| 39K (KED)  | 4,943.563 ppb         | 1,363,476 cps     |               |
| 40Ca (KED) | 92.446 ppb            | 45,497,284 cps    |               |

| Category    | Concentration average | Intensity average | Intensity RSD |
|-------------|-----------------------|-------------------|---------------|
| 51V (KED)   | 0.550 ppb             | 4,237 cps         |               |
| 52Cr (KED)  | 1.799 ppb             | 21,555 cps        |               |
| 55Mn (KED)  | 10.580 ppb            | 59,317 cps        |               |
| 56Fe (KED)  | 284.499 ppb           | 3,112,853 cps     |               |
| 58Ni (KED)  | 1.305 ppb             | 22,958 cps        |               |
| 59Co (KED)  | 6.753 ppb             | 160,404 cps       |               |
| 63Cu (KED)  | 8.448 ppb             | 153,950 cps       |               |
| 64Zn (KED)  | 231.203 ppb           | 1,011,875 cps     |               |
| 69Ga (KED)  | 1.553 ppb             | 8,753 cps         |               |
| 75As (KED)  | 0.497 ppb             | 673 cps           |               |
| 80Se (KED)  | 2.110 ppb             | 1,903 cps         |               |
| 85Rb (KED)  | 2.775 ppb             | 14,856 cps        |               |
| 88Sr (KED)  | 4.588 ppb             | 33,111 cps        |               |
| 107Ag (KED) | 0.074 ppb             | 3,691 cps         |               |
| 114Cd (KED) | 0.362 ppb             | 6,642 cps         |               |
| 133Cs (KED) | 0.056 ppb             | 1,530 cps         |               |
| 138Ba (KED) | 5.698 ppb             | 205,083 cps       |               |
| 139La (KED) | 0.257 ppb             | 18,614 cps        |               |
| 140Ce (KED) | 0.543 ppb             | 54,482 cps        |               |
| 141Pr (KED) | 0.064 ppb             | 6,328 cps         |               |
| 142Nd (KED) | 0.360 ppb             | 14,605 cps        |               |
| 152Sm (KED) | 0.048 ppb             | 1,907 cps         |               |
| 153Eu (KED) | 0.011 ppb             | 843 cps           |               |
| 158Gd (KED) | 0.043 ppb             | 2,320 cps         |               |
| 164Dy (KED) | 0.033 ppb             | 1,890 cps         |               |
| 165Ho (KED) | 0.006 ppb             | 1,210 cps         |               |
| 166Er (KED) | 0.018 ppb             | 1,307 cps         |               |
| 169Tm (KED) | 0.002 ppb             | 477 cps           |               |
| 174Yb (KED) | 0.013 ppb             | 1,180 cps         |               |
| 175Lu (KED) | 0.002 ppb             | 227 cps           |               |
| 205Tl (KED) | 0.009 ppb             | 1,530 cps         |               |
| 208Pb (KED) | 0.852 ppb             | 108,762 cps       |               |
| 232Th (KED) | 0.071 ppb             | 17,165 cps        |               |
| 238U (KED)  | 0.019 ppb             | 5,648 cps         |               |

## Sample Summary

Instrument ID: iCAP Q

Analysis index: 19

Analysis name: 1602639jian

Analysis started at: 8/26/2021 5:40:10 PM

User name: WINDOWS-UPCI4ER\Administrator

| Category    | Concentration average | Concentration RSD |
|-------------|-----------------------|-------------------|
| 9Be (KED)   | 0.000 ppb             |                   |
| 11B (KED)   | 4.695 ppb             |                   |
| 23Na (KED)  | 1,514.780 ppb         |                   |
| 24Mg (KED)  | 853.089 ppb           |                   |
| 27Al (KED)  | 438.106 ppb           |                   |
| 39K (KED)   | 5,029.638 ppb         |                   |
| 40Ca (KED)  | 157.286 ppb           |                   |
| 51V (KED)   | 0.753 ppb             |                   |
| 52Cr (KED)  | 1.907 ppb             |                   |
| 55Mn (KED)  | 17.903 ppb            |                   |
| 56Fe (KED)  | 388.052 ppb           |                   |
| 58Ni (KED)  | 1.977 ppb             |                   |
| 59Co (KED)  | 0.211 ppb             |                   |
| 63Cu (KED)  | 8.345 ppb             |                   |
| 64Zn (KED)  | 194.217 ppb           |                   |
| 69Ga (KED)  | 2.602 ppb             |                   |
| 75As (KED)  | 0.441 ppb             |                   |
| 80Se (KED)  | 0.580 ppb             |                   |
| 85Rb (KED)  | 2.453 ppb             |                   |
| 88Sr (KED)  | 8.700 ppb             |                   |
| 107Ag (KED) | 0.051 ppb             |                   |
| 114Cd (KED) | 0.124 ppb             |                   |
| 133Cs (KED) | 0.074 ppb             |                   |
| 138Ba (KED) | 9.733 ppb             |                   |
| 139La (KED) | 0.369 ppb             |                   |
| 140Ce (KED) | 0.768 ppb             |                   |
| 141Pr (KED) | 0.094 ppb             |                   |
| 142Nd (KED) | 0.512 ppb             |                   |
| 152Sm (KED) | 0.071 ppb             |                   |
| 153Eu (KED) | 0.018 ppb             |                   |
| 158Gd (KED) | 0.059 ppb             |                   |
| 164Dy (KED) | 0.044 ppb             |                   |
| 165Ho (KED) | 0.008 ppb             |                   |
| 166Er (KED) | 0.023 ppb             |                   |
| 169Tm (KED) | 0.003 ppb             |                   |
| 174Yb (KED) | 0.019 ppb             |                   |
| 175Lu (KED) | 0.003 ppb             |                   |
| 205Tl (KED) | 0.010 ppb             |                   |
| 208Pb (KED) | 1.043 ppb             |                   |
| 232Th (KED) | 0.099 ppb             |                   |
| 238U (KED)  | 0.024 ppb             |                   |

| Category   | Concentration average | Intensity average | Intensity RSD |
|------------|-----------------------|-------------------|---------------|
| 9Be (KED)  | 0.000 ppb             | 0 cps             |               |
| 11B (KED)  | 4.695 ppb             | 320 cps           |               |
| 23Na (KED) | 1,514.780 ppb         | 2,034,827 cps     |               |
| 24Mg (KED) | 853.089 ppb           | 408,714 cps       |               |
| 27Al (KED) | 438.106 ppb           | 54,583 cps        |               |
| 39K (KED)  | 5,029.638 ppb         | 1,387,050 cps     |               |
| 40Ca (KED) | 157.286 ppb           | 47,175,372 cps    |               |

| Category    | Concentration average | Intensity average | Intensity RSD |
|-------------|-----------------------|-------------------|---------------|
| 51V (KED)   | 0.753 ppb             | 5,795 cps         |               |
| 52Cr (KED)  | 1.907 ppb             | 22,844 cps        |               |
| 55Mn (KED)  | 17.903 ppb            | 100,291 cps       |               |
| 56Fe (KED)  | 388.052 ppb           | 4,244,673 cps     |               |
| 58Ni (KED)  | 1.977 ppb             | 32,823 cps        |               |
| 59Co (KED)  | 0.211 ppb             | 5,024 cps         |               |
| 63Cu (KED)  | 8.345 ppb             | 152,094 cps       |               |
| 64Zn (KED)  | 194.217 ppb           | 850,263 cps       |               |
| 69Ga (KED)  | 2.602 ppb             | 14,615 cps        |               |
| 75As (KED)  | 0.441 ppb             | 600 cps           |               |
| 80Se (KED)  | 0.580 ppb             | 1,297 cps         |               |
| 85Rb (KED)  | 2.453 ppb             | 13,140 cps        |               |
| 88Sr (KED)  | 8.700 ppb             | 62,640 cps        |               |
| 107Ag (KED) | 0.051 ppb             | 2,544 cps         |               |
| 114Cd (KED) | 0.124 ppb             | 2,277 cps         |               |
| 133Cs (KED) | 0.074 ppb             | 1,997 cps         |               |
| 138Ba (KED) | 9.733 ppb             | 349,075 cps       |               |
| 139La (KED) | 0.369 ppb             | 26,745 cps        |               |
| 140Ce (KED) | 0.768 ppb             | 76,993 cps        |               |
| 141Pr (KED) | 0.094 ppb             | 9,324 cps         |               |
| 142Nd (KED) | 0.512 ppb             | 20,737 cps        |               |
| 152Sm (KED) | 0.071 ppb             | 2,810 cps         |               |
| 153Eu (KED) | 0.018 ppb             | 1,347 cps         |               |
| 158Gd (KED) | 0.059 ppb             | 3,184 cps         |               |
| 164Dy (KED) | 0.044 ppb             | 2,537 cps         |               |
| 165Ho (KED) | 0.008 ppb             | 1,667 cps         |               |
| 166Er (KED) | 0.023 ppb             | 1,720 cps         |               |
| 169Tm (KED) | 0.003 ppb             | 740 cps           |               |
| 174Yb (KED) | 0.019 ppb             | 1,680 cps         |               |
| 175Lu (KED) | 0.003 ppb             | 417 cps           |               |
| 205Tl (KED) | 0.010 ppb             | 1,820 cps         |               |
| 208Pb (KED) | 1.043 ppb             | 132,415 cps       |               |
| 232Th (KED) | 0.099 ppb             | 23,766 cps        |               |
| 238U (KED)  | 0.024 ppb             | 6,895 cps         |               |

## Sample Summary

Instrument ID: iCAP Q

Analysis index: 20

Analysis name: 16014jian

Analysis started at: 8/26/2021 5:42:14 PM

User name: WINDOWS-UPCI4ER\Administrator

| Category    | Concentration average | Concentration RSD |
|-------------|-----------------------|-------------------|
| 9Be (KED)   | 0.000 ppb             |                   |
| 11B (KED)   | 3.212 ppb             |                   |
| 23Na (KED)  | 847.601 ppb           |                   |
| 24Mg (KED)  | 658.591 ppb           |                   |
| 27Al (KED)  | 641.616 ppb           |                   |
| 39K (KED)   | 5,454.581 ppb         |                   |
| 40Ca (KED)  | 138.515 ppb           |                   |
| 51V (KED)   | 1.153 ppb             |                   |
| 52Cr (KED)  | 2.211 ppb             |                   |
| 55Mn (KED)  | 19.547 ppb            |                   |
| 56Fe (KED)  | 501.794 ppb           |                   |
| 58Ni (KED)  | 2.362 ppb             |                   |
| 59Co (KED)  | 0.273 ppb             |                   |
| 63Cu (KED)  | 9.047 ppb             |                   |
| 64Zn (KED)  | 197.813 ppb           |                   |
| 69Ga (KED)  | 2.466 ppb             |                   |
| 75As (KED)  | 0.826 ppb             |                   |
| 80Se (KED)  | 1.858 ppb             |                   |
| 85Rb (KED)  | 2.977 ppb             |                   |
| 88Sr (KED)  | 8.256 ppb             |                   |
| 107Ag (KED) | 0.089 ppb             |                   |
| 114Cd (KED) | 0.322 ppb             |                   |
| 133Cs (KED) | 0.108 ppb             |                   |
| 138Ba (KED) | 9.249 ppb             |                   |
| 139La (KED) | 0.514 ppb             |                   |
| 140Ce (KED) | 1.028 ppb             |                   |
| 141Pr (KED) | 0.127 ppb             |                   |
| 142Nd (KED) | 0.677 ppb             |                   |
| 152Sm (KED) | 0.101 ppb             |                   |
| 153Eu (KED) | 0.021 ppb             |                   |
| 158Gd (KED) | 0.089 ppb             |                   |
| 164Dy (KED) | 0.068 ppb             |                   |
| 165Ho (KED) | 0.013 ppb             |                   |
| 166Er (KED) | 0.033 ppb             |                   |
| 169Tm (KED) | 0.004 ppb             |                   |
| 174Yb (KED) | 0.026 ppb             |                   |
| 175Lu (KED) | 0.004 ppb             |                   |
| 205Tl (KED) | 0.010 ppb             |                   |
| 208Pb (KED) | 0.920 ppb             |                   |
| 232Th (KED) | 0.152 ppb             |                   |
| 238U (KED)  | 0.030 ppb             |                   |

| Category   | Concentration average | Intensity average | Intensity RSD |
|------------|-----------------------|-------------------|---------------|
| 9Be (KED)  | 0.000 ppb             | 0 cps             |               |
| 11B (KED)  | 3.212 ppb             | 220 cps           |               |
| 23Na (KED) | 847.601 ppb           | 1,159,379 cps     |               |
| 24Mg (KED) | 658.591 ppb           | 315,614 cps       |               |
| 27Al (KED) | 641.616 ppb           | 79,919 cps        |               |
| 39K (KED)  | 5,454.581 ppb         | 1,503,431 cps     |               |
| 40Ca (KED) | 138.515 ppb           | 46,689,576 cps    |               |

| Category    | Concentration average | Intensity average | Intensity RSD |
|-------------|-----------------------|-------------------|---------------|
| 51V (KED)   | 1.153 ppb             | 8,860 cps         |               |
| 52Cr (KED)  | 2.211 ppb             | 26,478 cps        |               |
| 55Mn (KED)  | 19.547 ppb            | 109,491 cps       |               |
| 56Fe (KED)  | 501.794 ppb           | 5,487,860 cps     |               |
| 58Ni (KED)  | 2.362 ppb             | 38,479 cps        |               |
| 59Co (KED)  | 0.273 ppb             | 6,502 cps         |               |
| 63Cu (KED)  | 9.047 ppb             | 164,746 cps       |               |
| 64Zn (KED)  | 197.813 ppb           | 865,972 cps       |               |
| 69Ga (KED)  | 2.466 ppb             | 13,858 cps        |               |
| 75As (KED)  | 0.826 ppb             | 1,103 cps         |               |
| 80Se (KED)  | 1.858 ppb             | 1,803 cps         |               |
| 85Rb (KED)  | 2.977 ppb             | 15,927 cps        |               |
| 88Sr (KED)  | 8.256 ppb             | 59,451 cps        |               |
| 107Ag (KED) | 0.089 ppb             | 4,394 cps         |               |
| 114Cd (KED) | 0.322 ppb             | 5,905 cps         |               |
| 133Cs (KED) | 0.108 ppb             | 2,877 cps         |               |
| 138Ba (KED) | 9.249 ppb             | 331,802 cps       |               |
| 139La (KED) | 0.514 ppb             | 37,222 cps        |               |
| 140Ce (KED) | 1.028 ppb             | 103,087 cps       |               |
| 141Pr (KED) | 0.127 ppb             | 12,610 cps        |               |
| 142Nd (KED) | 0.677 ppb             | 27,447 cps        |               |
| 152Sm (KED) | 0.101 ppb             | 4,004 cps         |               |
| 153Eu (KED) | 0.021 ppb             | 1,590 cps         |               |
| 158Gd (KED) | 0.089 ppb             | 4,778 cps         |               |
| 164Dy (KED) | 0.068 ppb             | 3,907 cps         |               |
| 165Ho (KED) | 0.013 ppb             | 2,784 cps         |               |
| 166Er (KED) | 0.033 ppb             | 2,400 cps         |               |
| 169Tm (KED) | 0.004 ppb             | 1,010 cps         |               |
| 174Yb (KED) | 0.026 ppb             | 2,324 cps         |               |
| 175Lu (KED) | 0.004 ppb             | 537 cps           |               |
| 205Tl (KED) | 0.010 ppb             | 1,790 cps         |               |
| 208Pb (KED) | 0.920 ppb             | 117,154 cps       |               |
| 232Th (KED) | 0.152 ppb             | 36,370 cps        |               |
| 238U (KED)  | 0.030 ppb             | 8,716 cps         |               |

## Sample Summary

Instrument ID: iCAP Q

Analysis index: 21

Analysis name: 16001jian

Analysis started at: 8/26/2021 5:44:17 PM

User name: WINDOWS-UPCI4ER\Administrator

| Category    | Concentration average | Concentration RSD |
|-------------|-----------------------|-------------------|
| 9Be (KED)   | 0.027 ppb             |                   |
| 11B (KED)   | 8.302 ppb             |                   |
| 23Na (KED)  | 1,040.196 ppb         |                   |
| 24Mg (KED)  | 606.137 ppb           |                   |
| 27Al (KED)  | 381.191 ppb           |                   |
| 39K (KED)   | 6,265.278 ppb         |                   |
| 40Ca (KED)  | 108.740 ppb           |                   |
| 51V (KED)   | 0.743 ppb             |                   |
| 52Cr (KED)  | 1.604 ppb             |                   |
| 55Mn (KED)  | 16.003 ppb            |                   |
| 56Fe (KED)  | 320.978 ppb           |                   |
| 58Ni (KED)  | 1.719 ppb             |                   |
| 59Co (KED)  | 0.220 ppb             |                   |
| 63Cu (KED)  | 8.742 ppb             |                   |
| 64Zn (KED)  | 218.006 ppb           |                   |
| 69Ga (KED)  | 2.172 ppb             |                   |
| 75As (KED)  | 0.530 ppb             |                   |
| 80Se (KED)  | 2.379 ppb             |                   |
| 85Rb (KED)  | 2.957 ppb             |                   |
| 88Sr (KED)  | 7.230 ppb             |                   |
| 107Ag (KED) | 0.142 ppb             |                   |
| 114Cd (KED) | 0.440 ppb             |                   |
| 133Cs (KED) | 0.068 ppb             |                   |
| 138Ba (KED) | 8.980 ppb             |                   |
| 139La (KED) | 0.319 ppb             |                   |
| 140Ce (KED) | 0.615 ppb             |                   |
| 141Pr (KED) | 0.078 ppb             |                   |
| 142Nd (KED) | 0.419 ppb             |                   |
| 152Sm (KED) | 0.060 ppb             |                   |
| 153Eu (KED) | 0.014 ppb             |                   |
| 158Gd (KED) | 0.054 ppb             |                   |
| 164Dy (KED) | 0.042 ppb             |                   |
| 165Ho (KED) | 0.008 ppb             |                   |
| 166Er (KED) | 0.032 ppb             |                   |
| 169Tm (KED) | 0.003 ppb             |                   |
| 174Yb (KED) | 0.015 ppb             |                   |
| 175Lu (KED) | 0.002 ppb             |                   |
| 205Tl (KED) | 0.010 ppb             |                   |
| 208Pb (KED) | 1.013 ppb             |                   |
| 232Th (KED) | 0.123 ppb             |                   |
| 238U (KED)  | 0.034 ppb             |                   |

| Category   | Concentration average | Intensity average | Intensity RSD |
|------------|-----------------------|-------------------|---------------|
| 9Be (KED)  | 0.027 ppb             | 3 cps             |               |
| 11B (KED)  | 8.302 ppb             | 563 cps           |               |
| 23Na (KED) | 1,040.196 ppb         | 1,412,095 cps     |               |
| 24Mg (KED) | 606.137 ppb           | 290,507 cps       |               |
| 27Al (KED) | 381.191 ppb           | 47,497 cps        |               |
| 39K (KED)  | 6,265.278 ppb         | 1,725,462 cps     |               |
| 40Ca (KED) | 108.740 ppb           | 45,918,983 cps    |               |

| Category    | Concentration average | Intensity average | Intensity RSD |
|-------------|-----------------------|-------------------|---------------|
| 51V (KED)   | 0.743 ppb             | 5,715 cps         |               |
| 52Cr (KED)  | 1.604 ppb             | 19,235 cps        |               |
| 55Mn (KED)  | 16.003 ppb            | 89,661 cps        |               |
| 56Fe (KED)  | 320.978 ppb           | 3,511,559 cps     |               |
| 58Ni (KED)  | 1.719 ppb             | 29,034 cps        |               |
| 59Co (KED)  | 0.220 ppb             | 5,244 cps         |               |
| 63Cu (KED)  | 8.742 ppb             | 159,250 cps       |               |
| 64Zn (KED)  | 218.006 ppb           | 954,208 cps       |               |
| 69Ga (KED)  | 2.172 ppb             | 12,213 cps        |               |
| 75As (KED)  | 0.530 ppb             | 717 cps           |               |
| 80Se (KED)  | 2.379 ppb             | 2,010 cps         |               |
| 85Rb (KED)  | 2.957 ppb             | 15,820 cps        |               |
| 88Sr (KED)  | 7.230 ppb             | 52,082 cps        |               |
| 107Ag (KED) | 0.142 ppb             | 6,979 cps         |               |
| 114Cd (KED) | 0.440 ppb             | 8,076 cps         |               |
| 133Cs (KED) | 0.068 ppb             | 1,837 cps         |               |
| 138Ba (KED) | 8.980 ppb             | 322,179 cps       |               |
| 139La (KED) | 0.319 ppb             | 23,088 cps        |               |
| 140Ce (KED) | 0.615 ppb             | 61,732 cps        |               |
| 141Pr (KED) | 0.078 ppb             | 7,699 cps         |               |
| 142Nd (KED) | 0.419 ppb             | 16,988 cps        |               |
| 152Sm (KED) | 0.060 ppb             | 2,367 cps         |               |
| 153Eu (KED) | 0.014 ppb             | 1,107 cps         |               |
| 158Gd (KED) | 0.054 ppb             | 2,874 cps         |               |
| 164Dy (KED) | 0.042 ppb             | 2,424 cps         |               |
| 165Ho (KED) | 0.008 ppb             | 1,640 cps         |               |
| 166Er (KED) | 0.032 ppb             | 2,337 cps         |               |
| 169Tm (KED) | 0.003 ppb             | 633 cps           |               |
| 174Yb (KED) | 0.015 ppb             | 1,363 cps         |               |
| 175Lu (KED) | 0.002 ppb             | 303 cps           |               |
| 205Tl (KED) | 0.010 ppb             | 1,740 cps         |               |
| 208Pb (KED) | 1.013 ppb             | 128,744 cps       |               |
| 232Th (KED) | 0.123 ppb             | 29,542 cps        |               |
| 238U (KED)  | 0.034 ppb             | 9,937 cps         |               |

## Sample Summary

Instrument ID: iCAP Q

Analysis index: 22

Analysis name: 1702121jian

Analysis started at: 8/26/2021 5:46:28 PM

User name: WINDOWS-UPCI4ER\Administrator

| Category    | Concentration average | Concentration RSD |
|-------------|-----------------------|-------------------|
| 9Be (KED)   | 0.027 ppb             |                   |
| 11B (KED)   | 5.881 ppb             |                   |
| 23Na (KED)  | 2,615.752 ppb         |                   |
| 24Mg (KED)  | 742.918 ppb           |                   |
| 27Al (KED)  | 502.774 ppb           |                   |
| 39K (KED)   | 8,416.161 ppb         |                   |
| 40Ca (KED)  | 147.923 ppb           |                   |
| 51V (KED)   | 0.849 ppb             |                   |
| 52Cr (KED)  | 1.372 ppb             |                   |
| 55Mn (KED)  | 14.548 ppb            |                   |
| 56Fe (KED)  | 409.468 ppb           |                   |
| 58Ni (KED)  | 2.120 ppb             |                   |
| 59Co (KED)  | 0.244 ppb             |                   |
| 63Cu (KED)  | 9.783 ppb             |                   |
| 64Zn (KED)  | 224.630 ppb           |                   |
| 69Ga (KED)  | 2.319 ppb             |                   |
| 75As (KED)  | 0.444 ppb             |                   |
| 80Se (KED)  | 2.799 ppb             |                   |
| 85Rb (KED)  | 4.791 ppb             |                   |
| 88Sr (KED)  | 7.154 ppb             |                   |
| 107Ag (KED) | 0.078 ppb             |                   |
| 114Cd (KED) | 0.509 ppb             |                   |
| 133Cs (KED) | 0.088 ppb             |                   |
| 138Ba (KED) | 8.723 ppb             |                   |
| 139La (KED) | 0.405 ppb             |                   |
| 140Ce (KED) | 0.800 ppb             |                   |
| 141Pr (KED) | 0.101 ppb             |                   |
| 142Nd (KED) | 0.538 ppb             |                   |
| 152Sm (KED) | 0.072 ppb             |                   |
| 153Eu (KED) | 0.021 ppb             |                   |
| 158Gd (KED) | 0.069 ppb             |                   |
| 164Dy (KED) | 0.052 ppb             |                   |
| 165Ho (KED) | 0.009 ppb             |                   |
| 166Er (KED) | 0.023 ppb             |                   |
| 169Tm (KED) | 0.004 ppb             |                   |
| 174Yb (KED) | 0.021 ppb             |                   |
| 175Lu (KED) | 0.004 ppb             |                   |
| 205Tl (KED) | 0.014 ppb             |                   |
| 208Pb (KED) | 1.066 ppb             |                   |
| 232Th (KED) | 0.111 ppb             |                   |
| 238U (KED)  | 0.024 ppb             |                   |

| Category   | Concentration average | Intensity average | Intensity RSD |
|------------|-----------------------|-------------------|---------------|
| 9Be (KED)  | 0.027 ppb             | 3 cps             |               |
| 11B (KED)  | 5.881 ppb             | 400 cps           |               |
| 23Na (KED) | 2,615.752 ppb         | 3,479,481 cps     |               |
| 24Mg (KED) | 742.918 ppb           | 355,979 cps       |               |
| 27Al (KED) | 502.774 ppb           | 62,633 cps        |               |
| 39K (KED)  | 8,416.161 ppb         | 2,314,536 cps     |               |
| 40Ca (KED) | 147.923 ppb           | 46,933,073 cps    |               |

| Category    | Concentration average | Intensity average | Intensity RSD |
|-------------|-----------------------|-------------------|---------------|
| 51V (KED)   | 0.849 ppb             | 6,532 cps         |               |
| 52Cr (KED)  | 1.372 ppb             | 16,471 cps        |               |
| 55Mn (KED)  | 14.548 ppb            | 81,519 cps        |               |
| 56Fe (KED)  | 409.468 ppb           | 4,478,745 cps     |               |
| 58Ni (KED)  | 2.120 ppb             | 34,932 cps        |               |
| 59Co (KED)  | 0.244 ppb             | 5,815 cps         |               |
| 63Cu (KED)  | 9.783 ppb             | 177,999 cps       |               |
| 64Zn (KED)  | 224.630 ppb           | 983,155 cps       |               |
| 69Ga (KED)  | 2.319 ppb             | 13,037 cps        |               |
| 75As (KED)  | 0.444 ppb             | 603 cps           |               |
| 80Se (KED)  | 2.799 ppb             | 2,177 cps         |               |
| 85Rb (KED)  | 4.791 ppb             | 25,576 cps        |               |
| 88Sr (KED)  | 7.154 ppb             | 51,536 cps        |               |
| 107Ag (KED) | 0.078 ppb             | 3,871 cps         |               |
| 114Cd (KED) | 0.509 ppb             | 9,330 cps         |               |
| 133Cs (KED) | 0.088 ppb             | 2,357 cps         |               |
| 138Ba (KED) | 8.723 ppb             | 313,019 cps       |               |
| 139La (KED) | 0.405 ppb             | 29,381 cps        |               |
| 140Ce (KED) | 0.800 ppb             | 80,227 cps        |               |
| 141Pr (KED) | 0.101 ppb             | 10,017 cps        |               |
| 142Nd (KED) | 0.538 ppb             | 21,812 cps        |               |
| 152Sm (KED) | 0.072 ppb             | 2,880 cps         |               |
| 153Eu (KED) | 0.021 ppb             | 1,600 cps         |               |
| 158Gd (KED) | 0.069 ppb             | 3,694 cps         |               |
| 164Dy (KED) | 0.052 ppb             | 2,984 cps         |               |
| 165Ho (KED) | 0.009 ppb             | 1,863 cps         |               |
| 166Er (KED) | 0.023 ppb             | 1,673 cps         |               |
| 169Tm (KED) | 0.004 ppb             | 897 cps           |               |
| 174Yb (KED) | 0.021 ppb             | 1,863 cps         |               |
| 175Lu (KED) | 0.004 ppb             | 543 cps           |               |
| 205Tl (KED) | 0.014 ppb             | 2,540 cps         |               |
| 208Pb (KED) | 1.066 ppb             | 135,312 cps       |               |
| 232Th (KED) | 0.111 ppb             | 26,702 cps        |               |
| 238U (KED)  | 0.024 ppb             | 6,955 cps         |               |

## Sample Summary

Instrument ID: iCAP Q

Analysis index: 23

Analysis name: 1701274jian

Analysis started at: 8/26/2021 5:48:31 PM

User name: WINDOWS-UPCI4ER\Administrator

| Category    | Concentration average | Concentration RSD |
|-------------|-----------------------|-------------------|
| 9Be (KED)   | 0.000 ppb             |                   |
| 11B (KED)   | 6.079 ppb             |                   |
| 23Na (KED)  | 724.517 ppb           |                   |
| 24Mg (KED)  | 742.805 ppb           |                   |
| 27Al (KED)  | 444.106 ppb           |                   |
| 39K (KED)   | 4,897.239 ppb         |                   |
| 40Ca (KED)  | 183.835 ppb           |                   |
| 51V (KED)   | 0.863 ppb             |                   |
| 52Cr (KED)  | 1.204 ppb             |                   |
| 55Mn (KED)  | 17.366 ppb            |                   |
| 56Fe (KED)  | 377.407 ppb           |                   |
| 58Ni (KED)  | 1.839 ppb             |                   |
| 59Co (KED)  | 0.236 ppb             |                   |
| 63Cu (KED)  | 11.664 ppb            |                   |
| 64Zn (KED)  | 207.583 ppb           |                   |
| 69Ga (KED)  | 2.775 ppb             |                   |
| 75As (KED)  | 0.372 ppb             |                   |
| 80Se (KED)  | 1.749 ppb             |                   |
| 85Rb (KED)  | 2.158 ppb             |                   |
| 88Sr (KED)  | 10.217 ppb            |                   |
| 107Ag (KED) | 0.076 ppb             |                   |
| 114Cd (KED) | 0.295 ppb             |                   |
| 133Cs (KED) | 0.073 ppb             |                   |
| 138Ba (KED) | 11.146 ppb            |                   |
| 139La (KED) | 0.404 ppb             |                   |
| 140Ce (KED) | 0.774 ppb             |                   |
| 141Pr (KED) | 0.110 ppb             |                   |
| 142Nd (KED) | 0.533 ppb             |                   |
| 152Sm (KED) | 0.075 ppb             |                   |
| 153Eu (KED) | 0.016 ppb             |                   |
| 158Gd (KED) | 0.069 ppb             |                   |
| 164Dy (KED) | 0.047 ppb             |                   |
| 165Ho (KED) | 0.008 ppb             |                   |
| 166Er (KED) | 0.025 ppb             |                   |
| 169Tm (KED) | 0.003 ppb             |                   |
| 174Yb (KED) | 0.020 ppb             |                   |
| 175Lu (KED) | 0.003 ppb             |                   |
| 205Tl (KED) | 0.010 ppb             |                   |
| 208Pb (KED) | 0.864 ppb             |                   |
| 232Th (KED) | 0.101 ppb             |                   |
| 238U (KED)  | 0.026 ppb             |                   |

| Category   | Concentration average | Intensity average | Intensity RSD |
|------------|-----------------------|-------------------|---------------|
| 9Be (KED)  | 0.000 ppb             | 0 cps             |               |
| 11B (KED)  | 6.079 ppb             | 413 cps           |               |
| 23Na (KED) | 724.517 ppb           | 997,873 cps       |               |
| 24Mg (KED) | 742.805 ppb           | 355,925 cps       |               |
| 27Al (KED) | 444.106 ppb           | 55,329 cps        |               |
| 39K (KED)  | 4,897.239 ppb         | 1,350,789 cps     |               |
| 40Ca (KED) | 183.835 ppb           | 47,862,476 cps    |               |

| Category    | Concentration average | Intensity average | Intensity RSD |
|-------------|-----------------------|-------------------|---------------|
| 51V (KED)   | 0.863 ppb             | 6,635 cps         |               |
| 52Cr (KED)  | 1.204 ppb             | 14,458 cps        |               |
| 55Mn (KED)  | 17.366 ppb            | 97,291 cps        |               |
| 56Fe (KED)  | 377.407 ppb           | 4,128,321 cps     |               |
| 58Ni (KED)  | 1.839 ppb             | 30,808 cps        |               |
| 59Co (KED)  | 0.236 ppb             | 5,611 cps         |               |
| 63Cu (KED)  | 11.664 ppb            | 211,895 cps       |               |
| 64Zn (KED)  | 207.583 ppb           | 908,665 cps       |               |
| 69Ga (KED)  | 2.775 ppb             | 15,583 cps        |               |
| 75As (KED)  | 0.372 ppb             | 510 cps           |               |
| 80Se (KED)  | 1.749 ppb             | 1,760 cps         |               |
| 85Rb (KED)  | 2.158 ppb             | 11,575 cps        |               |
| 88Sr (KED)  | 10.217 ppb            | 73,536 cps        |               |
| 107Ag (KED) | 0.076 ppb             | 3,761 cps         |               |
| 114Cd (KED) | 0.295 ppb             | 5,421 cps         |               |
| 133Cs (KED) | 0.073 ppb             | 1,977 cps         |               |
| 138Ba (KED) | 11.146 ppb            | 399,485 cps       |               |
| 139La (KED) | 0.404 ppb             | 29,264 cps        |               |
| 140Ce (KED) | 0.774 ppb             | 77,604 cps        |               |
| 141Pr (KED) | 0.110 ppb             | 10,925 cps        |               |
| 142Nd (KED) | 0.533 ppb             | 21,592 cps        |               |
| 152Sm (KED) | 0.075 ppb             | 3,000 cps         |               |
| 153Eu (KED) | 0.016 ppb             | 1,227 cps         |               |
| 158Gd (KED) | 0.069 ppb             | 3,707 cps         |               |
| 164Dy (KED) | 0.047 ppb             | 2,687 cps         |               |
| 165Ho (KED) | 0.008 ppb             | 1,760 cps         |               |
| 166Er (KED) | 0.025 ppb             | 1,877 cps         |               |
| 169Tm (KED) | 0.003 ppb             | 793 cps           |               |
| 174Yb (KED) | 0.020 ppb             | 1,730 cps         |               |
| 175Lu (KED) | 0.003 ppb             | 373 cps           |               |
| 205Tl (KED) | 0.010 ppb             | 1,760 cps         |               |
| 208Pb (KED) | 0.864 ppb             | 110,295 cps       |               |
| 232Th (KED) | 0.101 ppb             | 24,224 cps        |               |
| 238U (KED)  | 0.026 ppb             | 7,552 cps         |               |
