# Supplementary material for: Geographic and breed-specific traceability of cashmere via mineral element profiling in Inner Mongolia (Ordos, Chifeng, and Alxa League)
Source: Royal Society of Chemistry journal article supplement (doi:10.1039/d5ra08122j), 2026-01-01
Supplement: d5ra08122j1.zip [file 20210827-chi feng han shan ba lin you qi.pdf › ԭʼ޿/20210827-chi feng han shan ba lin you qi.pdf]

## Instrument Summary:

Instrument ID: iCAP Q  
Serial Number: Undefined

## Labbook Summary:

Path and filename: \_Application Data\Workspace\LabBooks\wlv\20210827-3.imexp  
Labbook created by: Administrator  
Based on template:  
Hardware configuration: iCAPQ1  
Labbook type: eQuant  
Qtegra version (last saved): 2.7.2425.154  
Labbook started: 8/27/2021 4:29:06 PM  
Labbook finished: 8/27/2021 5:41:42 PM

## Method Summary:

| Isotope     | Mode | Dwell time (s) | # of Channels | Spacing | Resolution | IS |
|-------------|------|----------------|---------------|---------|------------|----|
| 9Be (KED)   | KED  | 0.03           | 3             | 0.1     | Normal     |    |
| 11B (KED)   | KED  | 0.03           | 3             | 0.1     | Normal     |    |
| 24Mg (KED)  | KED  | 0.03           | 3             | 0.1     | Normal     |    |
| 27Al (KED)  | KED  | 0.03           | 3             | 0.1     | Normal     |    |
| 51V (KED)   | KED  | 0.03           | 3             | 0.1     | Normal     |    |
| 52Cr (KED)  | KED  | 0.03           | 3             | 0.1     | Normal     |    |
| 55Mn (KED)  | KED  | 0.03           | 3             | 0.1     | Normal     |    |
| 56Fe (KED)  | KED  | 0.03           | 3             | 0.1     | Normal     |    |
| 58Ni (KED)  | KED  | 0.03           | 3             | 0.1     | Normal     |    |
| 59Co (KED)  | KED  | 0.03           | 3             | 0.1     | Normal     |    |
| 63Cu (KED)  | KED  | 0.03           | 3             | 0.1     | Normal     |    |
| 64Zn (KED)  | KED  | 0.03           | 3             | 0.1     | Normal     |    |
| 69Ga (KED)  | KED  | 0.03           | 3             | 0.1     | Normal     |    |
| 75As (KED)  | KED  | 0.03           | 3             | 0.1     | Normal     |    |
| 80Se (KED)  | KED  | 0.03           | 3             | 0.1     | Normal     |    |
| 85Rb (KED)  | KED  | 0.03           | 3             | 0.1     | Normal     |    |
| 88Sr (KED)  | KED  | 0.03           | 3             | 0.1     | Normal     |    |
| 107Ag (KED) | KED  | 0.03           | 3             | 0.1     | Normal     |    |
| 114Cd (KED) | KED  | 0.03           | 3             | 0.1     | Normal     |    |
| 133Cs (KED) | KED  | 0.03           | 3             | 0.1     | Normal     |    |
| 138Ba (KED) | KED  | 0.03           | 3             | 0.1     | Normal     |    |
| 139La (KED) | KED  | 0.03           | 3             | 0.1     | Normal     |    |
| 140Ce (KED) | KED  | 0.03           | 3             | 0.1     | Normal     |    |
| 141Pr (KED) | KED  | 0.03           | 3             | 0.1     | Normal     |    |
| 142Nd (KED) | KED  | 0.03           | 3             | 0.1     | Normal     |    |
| 152Sm (KED) | KED  | 0.03           | 3             | 0.1     | Normal     |    |
| 153Eu (KED) | KED  | 0.03           | 3             | 0.1     | Normal     |    |
| 158Gd (KED) | KED  | 0.03           | 3             | 0.1     | Normal     |    |
| 164Dy (KED) | KED  | 0.03           | 3             | 0.1     | Normal     |    |
| 165Ho (KED) | KED  | 0.03           | 3             | 0.1     | Normal     |    |
| 166Er (KED) | KED  | 0.03           | 3             | 0.1     | Normal     |    |
| 169Tm (KED) | KED  | 0.03           | 3             | 0.1     | Normal     |    |
| 174Yb (KED) | KED  | 0.03           | 3             | 0.1     | Normal     |    |
| 175Lu (KED) | KED  | 0.03           | 3             | 0.1     | Normal     |    |
| 205Tl (KED) | KED  | 0.03           | 3             | 0.1     | Normal     |    |
| 208Pb (KED) | KED  | 0.03           | 3             | 0.1     | Normal     |    |
| 232Th (KED) | KED  | 0.03           | 3             | 0.1     | Normal     |    |
| 238U (KED)  | KED  | 0.03           | 3             | 0.1     | Normal     |    |

| Isotope    | Mode | Dwell time (s) | # of Channels | Spacing | Resolution |
|------------|------|----------------|---------------|---------|------------|
| 9Be (KED)  | KED  | 0.03           | 3             | 0.1     | Normal     |
| 11B (KED)  | KED  | 0.03           | 3             | 0.1     | Normal     |
| 24Mg (KED) | KED  | 0.03           | 3             | 0.1     | Normal     |
| 27Al (KED) | KED  | 0.03           | 3             | 0.1     | Normal     |
| 51V (KED)  | KED  | 0.03           | 3             | 0.1     | Normal     |
| 52Cr (KED) | KED  | 0.03           | 3             | 0.1     | Normal     |
| 55Mn (KED) | KED  | 0.03           | 3             | 0.1     | Normal     |
| 56Fe (KED) | KED  | 0.03           | 3             | 0.1     | Normal     |
| 58Ni (KED) | KED  | 0.03           | 3             | 0.1     | Normal     |
| 59Co (KED) | KED  | 0.03           | 3             | 0.1     | Normal     |
| 63Cu (KED) | KED  | 0.03           | 3             | 0.1     | Normal     |
| 64Zn (KED) | KED  | 0.03           | 3             | 0.1     | Normal     |
| 69Ga (KED) | KED  | 0.03           | 3             | 0.1     | Normal     |
| 75As (KED) | KED  | 0.03           | 3             | 0.1     | Normal     |
| 80Se (KED) | KED  | 0.03           | 3             | 0.1     | Normal     |
| 85Rb (KED) | KED  | 0.03           | 3             | 0.1     | Normal     |
| 88Sr (KED) | KED  | 0.03           | 3             | 0.1     | Normal     |

| Isotope     | Mode | Dwell time (s) | # of Channels | Spacing | Resolution |
|-------------|------|----------------|---------------|---------|------------|
| 107Ag (KED) | KED  | 0.03           | 3             | 0.1     | Normal     |
| 114Cd (KED) | KED  | 0.03           | 3             | 0.1     | Normal     |
| 133Cs (KED) | KED  | 0.03           | 3             | 0.1     | Normal     |
| 138Ba (KED) | KED  | 0.03           | 3             | 0.1     | Normal     |
| 139La (KED) | KED  | 0.03           | 3             | 0.1     | Normal     |
| 140Ce (KED) | KED  | 0.03           | 3             | 0.1     | Normal     |
| 141Pr (KED) | KED  | 0.03           | 3             | 0.1     | Normal     |
| 142Nd (KED) | KED  | 0.03           | 3             | 0.1     | Normal     |
| 152Sm (KED) | KED  | 0.03           | 3             | 0.1     | Normal     |
| 153Eu (KED) | KED  | 0.03           | 3             | 0.1     | Normal     |
| 158Gd (KED) | KED  | 0.03           | 3             | 0.1     | Normal     |
| 164Dy (KED) | KED  | 0.03           | 3             | 0.1     | Normal     |
| 165Ho (KED) | KED  | 0.03           | 3             | 0.1     | Normal     |
| 166Er (KED) | KED  | 0.03           | 3             | 0.1     | Normal     |
| 169Tm (KED) | KED  | 0.03           | 3             | 0.1     | Normal     |
| 174Yb (KED) | KED  | 0.03           | 3             | 0.1     | Normal     |
| 175Lu (KED) | KED  | 0.03           | 3             | 0.1     | Normal     |
| 205Tl (KED) | KED  | 0.03           | 3             | 0.1     | Normal     |
| 208Pb (KED) | KED  | 0.03           | 3             | 0.1     | Normal     |
| 232Th (KED) | KED  | 0.03           | 3             | 0.1     | Normal     |
| 238U (KED)  | KED  | 0.03           | 3             | 0.1     | Normal     |

| No. of sweeps | Time per sweep[s] | Time per main run[s] |
|---------------|-------------------|----------------------|
| 10            | 3.42              | 34.2                 |

## Calibration Curves:

9Be (KED)

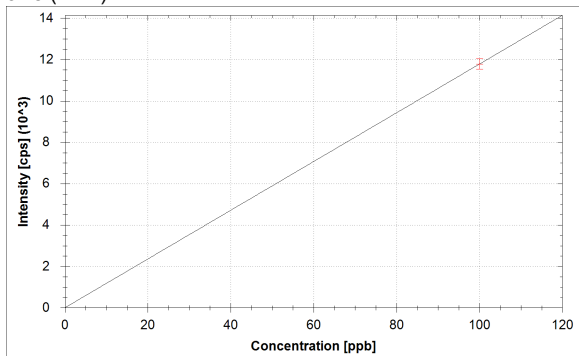

$$f(x) = 117.7890 \cdot x$$

$$R^2 = 1.0000$$

$$\text{BEC} = 0.000 \text{ ppb}$$

$$\text{LoD} = 0.0000 \text{ ppb}$$

11B (KED)

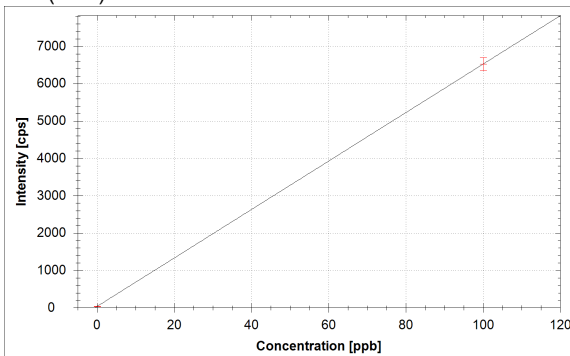

$$f(x) = 64.8727 \cdot x + 36.6668$$

$$R^2 = 1.0000$$

$$\text{BEC} = 0.565 \text{ ppb}$$

$$\text{LoD} = 0.3083 \text{ ppb}$$

24Mg (KED)

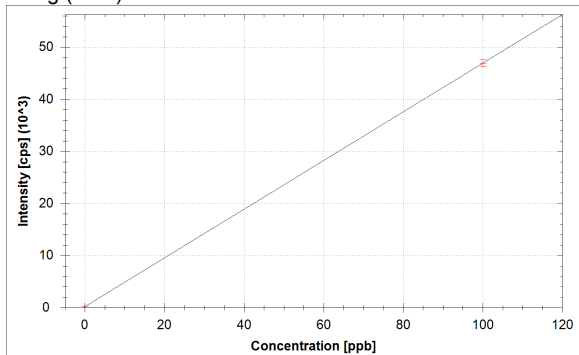

$$f(x) = 467.1582 \cdot x + 186.6683$$

$$R^2 = 1.0000$$

$$\text{BEC} = 0.400 \text{ ppb}$$

$$\text{LoD} = 0.0772 \text{ ppb}$$

27Al (KED)

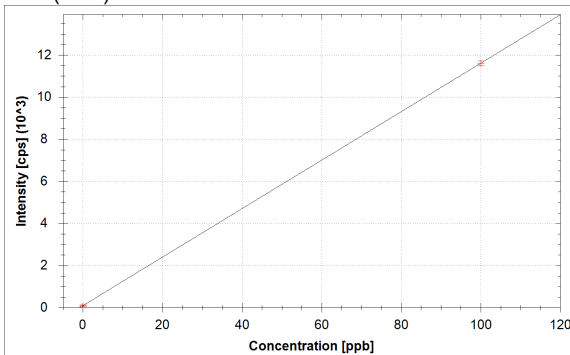

$$f(x) = 115.1763 \cdot x + 91.1117$$

$$R^2 = 1.0000$$

$$\text{BEC} = 0.791 \text{ ppb}$$

$$\text{LoD} = 0.8869 \text{ ppb}$$

51V (KED)

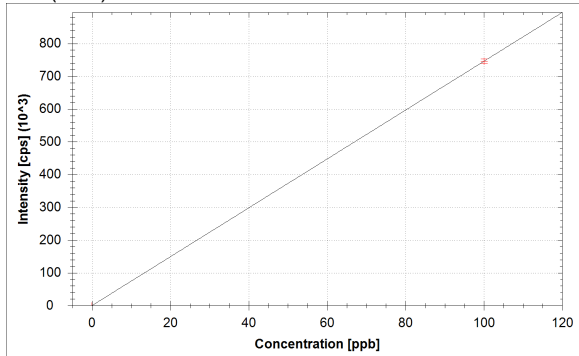

$$f(x) = 7458.4433 \cdot x + 4.4445$$

$$R^2 = 1.0000$$

$$\text{BEC} = 0.001 \text{ ppb}$$

$$\text{LoD} = 0.0020 \text{ ppb}$$

52Cr (KED)

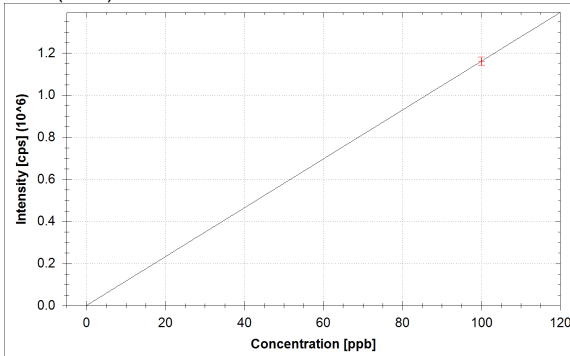

$$f(x) = 11612.0929 \cdot x + 150.0011$$

$$R^2 = 1.0000$$

$$\text{BEC} = 0.013 \text{ ppb}$$

$$\text{LoD} = 0.0078 \text{ ppb}$$

55Mn (KED)

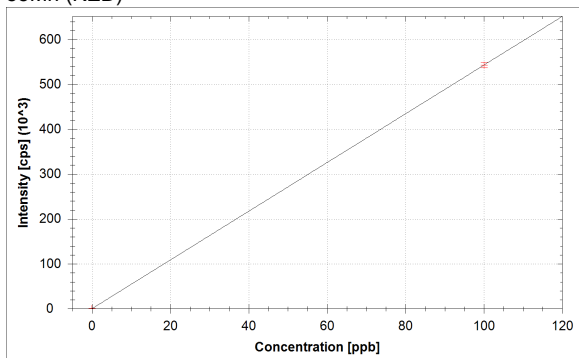

$$f(x) = 5428.8140 \cdot x + 240.0027$$

$$R^2 = 1.0000$$

$$\text{BEC} = 0.044 \text{ ppb}$$

$$\text{LoD} = 0.0394 \text{ ppb}$$

56Fe (KED)

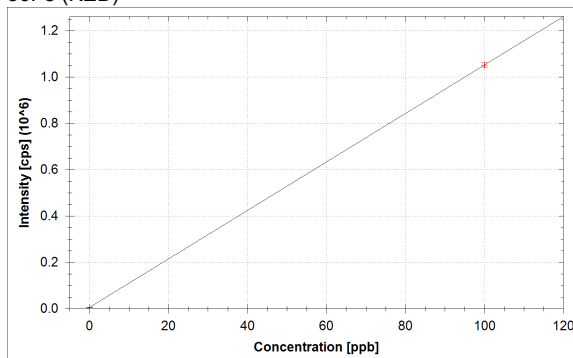

$$f(x) = 10461.0805 \cdot x + 5570.2984$$

$$R^2 = 1.0000$$

$$\text{BEC} = 0.532 \text{ ppb}$$

$$\text{LoD} = 0.1972 \text{ ppb}$$

58Ni (KED)

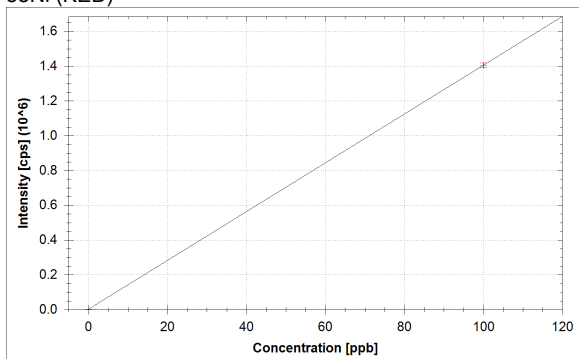

$$f(x) = 14034.1997 \cdot x + 1781.2404$$

$$R^2 = 1.0000$$

$$\text{BEC} = 0.127 \text{ ppb}$$

$$\text{LoD} = 0.0089 \text{ ppb}$$

59Co (KED)

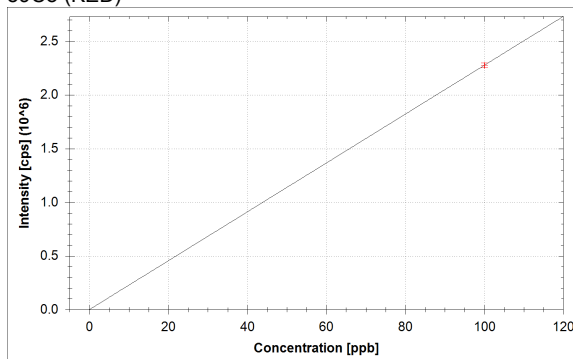

$$f(x) = 22765.1581 \cdot x + 7.7778$$

$$R^2 = 1.0000$$

$$\text{BEC} = 0.000 \text{ ppb}$$

$$\text{LoD} = 0.0005 \text{ ppb}$$

63Cu (KED)

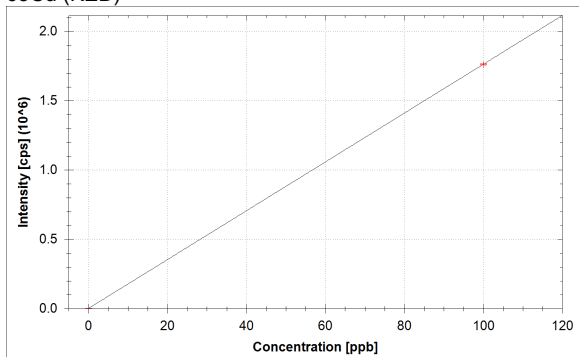

$$f(x) = 17623.9540 \cdot x + 814.4729$$

$$R^2 = 1.0000$$

$$\text{BEC} = 0.046 \text{ ppb}$$

$$\text{LoD} = 0.0237 \text{ ppb}$$

64Zn (KED)

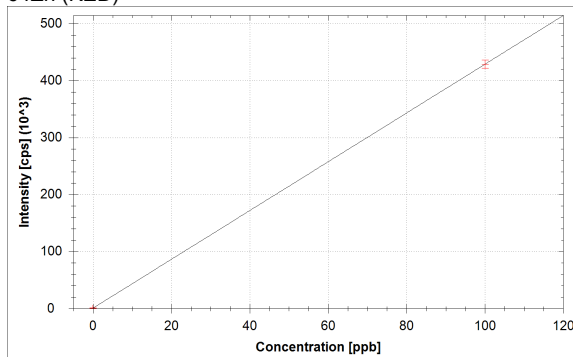

$$f(x) = 4277.8705 \cdot x + 804.4715$$

$$R^2 = 1.0000$$

$$\text{BEC} = 0.188 \text{ ppb}$$

$$\text{LoD} = 0.0296 \text{ ppb}$$

69Ga (KED)

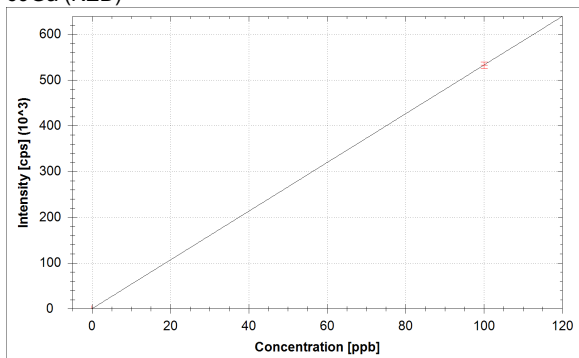

$$f(x) = 5325.4331x + 161.1125$$

$$R^2 = 1.0000$$

$$\text{BEC} = 0.030 \text{ ppb}$$

$$\text{LoD} = 0.0095 \text{ ppb}$$

75As (KED)

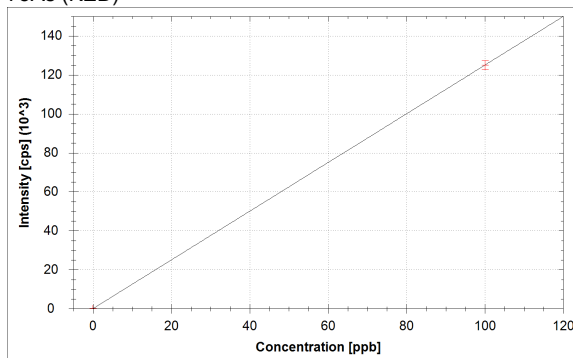

$$f(x) = 1249.7980x + 62.2225$$

$$R^2 = 1.0000$$

$$\text{BEC} = 0.050 \text{ ppb}$$

$$\text{LoD} = 0.0514 \text{ ppb}$$

80Se (KED)

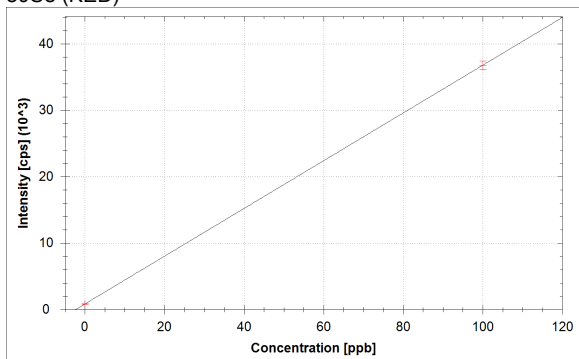

$$f(x) = 359.4636x + 831.1402$$

$$R^2 = 1.0000$$

$$\text{BEC} = 2.312 \text{ ppb}$$

$$\text{LoD} = 0.4025 \text{ ppb}$$

85Rb (KED)

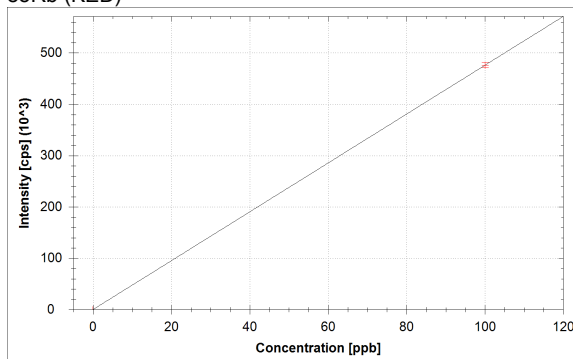

$$f(x) = 4759.4253x + 43.3335$$

$$R^2 = 1.0000$$

$$\text{BEC} = 0.009 \text{ ppb}$$

$$\text{LoD} = 0.0073 \text{ ppb}$$

88Sr (KED)

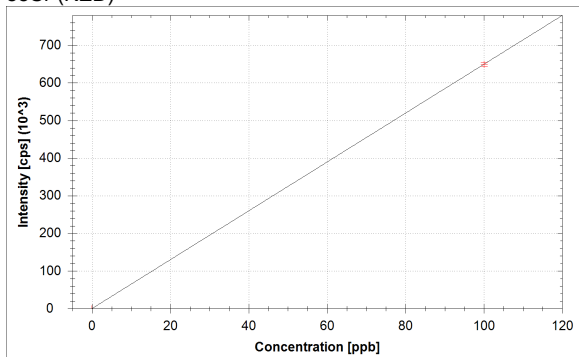

$$f(x) = 6494.1301x + 88.8893$$

$$R^2 = 1.0000$$

$$\text{BEC} = 0.014 \text{ ppb}$$

$$\text{LoD} = 0.0105 \text{ ppb}$$

107Ag (KED)

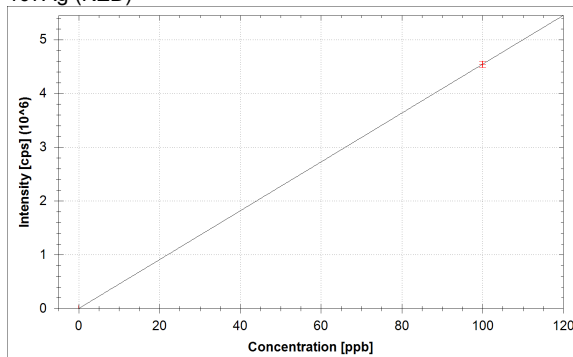

$$f(x) = 45426.4398x + 107.7784$$

$$R^2 = 1.0000$$

$$\text{BEC} = 0.002 \text{ ppb}$$

$$\text{LoD} = 0.0018 \text{ ppb}$$

114Cd (KED)

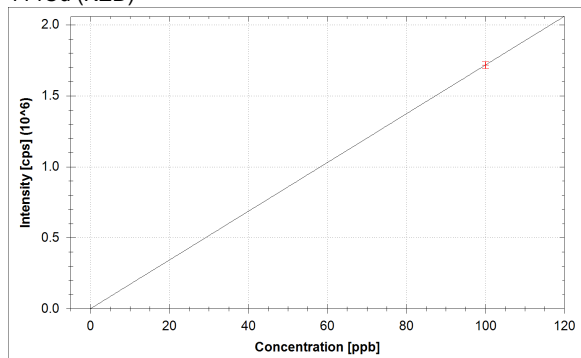

$$f(x) = 17161.2191 \cdot x + 30.0001$$

$$R^2 = 1.0000$$

$$\text{BEC} = 0.002 \text{ ppb}$$

$$\text{LoD} = 0.0006 \text{ ppb}$$

133Cs (KED)

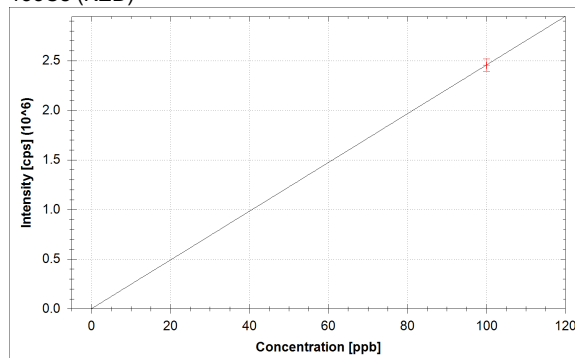

$$f(x) = 24547.3569 \cdot x + 83.3337$$

$$R^2 = 1.0000$$

$$\text{BEC} = 0.003 \text{ ppb}$$

$$\text{LoD} = 0.0007 \text{ ppb}$$

138Ba (KED)

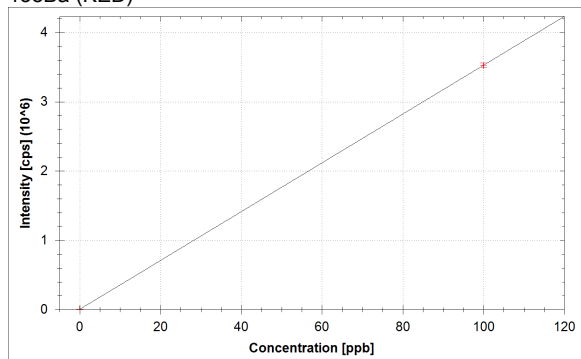

$$f(x) = 35237.7080 \cdot x + 3207.0838$$

$$R^2 = 1.0000$$

$$\text{BEC} = 0.091 \text{ ppb}$$

$$\text{LoD} = 0.0047 \text{ ppb}$$

139La (KED)

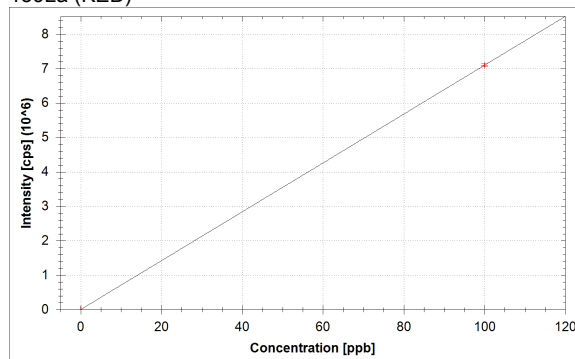

$$f(x) = 70987.1758 \cdot x + 26.6667$$

$$R^2 = 1.0000$$

$$\text{BEC} = 0.000 \text{ ppb}$$

$$\text{LoD} = 0.0004 \text{ ppb}$$

140Ce (KED)

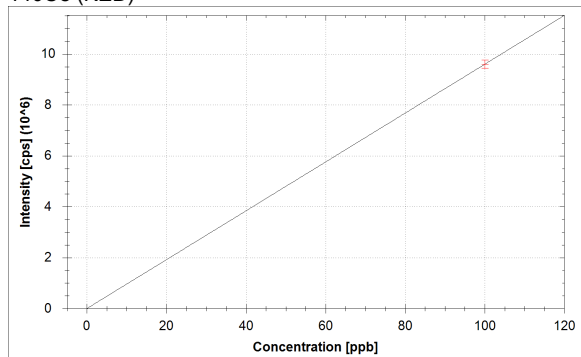

$$f(x) = 95973.1198 \cdot x + 141.1121$$

$$R^2 = 1.0000$$

$$\text{BEC} = 0.001 \text{ ppb}$$

$$\text{LoD} = 0.0006 \text{ ppb}$$

141Pr (KED)

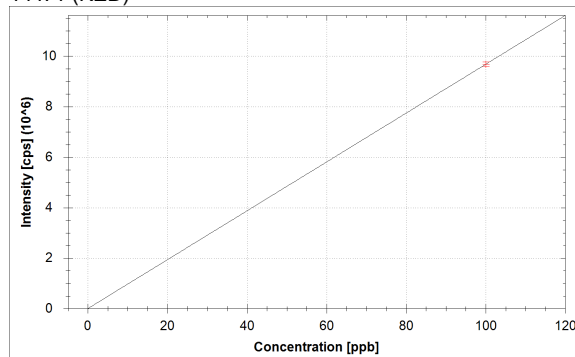

$$f(x) = 96800.4912 \cdot x + 8.8889$$

$$R^2 = 1.0000$$

$$\text{BEC} = 0.000 \text{ ppb}$$

$$\text{LoD} = 0.0001 \text{ ppb}$$

**<sup>142</sup>Nd (KED)**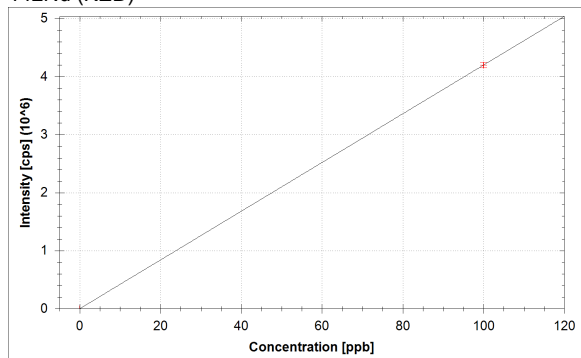

$$f(x) = 41987.1771 \cdot x + 41.1112$$

$$R^2 = 1.0000$$

$$\text{BEC} = 0.001 \text{ ppb}$$

$$\text{LoD} = 0.0008 \text{ ppb}$$

**<sup>152</sup>Sm (KED)**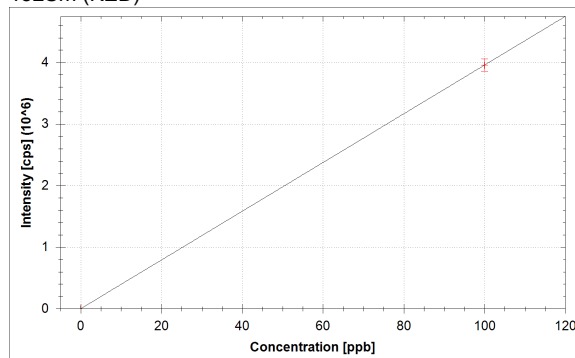

$$f(x) = 39565.1656 \cdot x + 4.4445$$

$$R^2 = 1.0000$$

$$\text{BEC} = 0.000 \text{ ppb}$$

$$\text{LoD} = 0.0003 \text{ ppb}$$

**<sup>153</sup>Eu (KED)**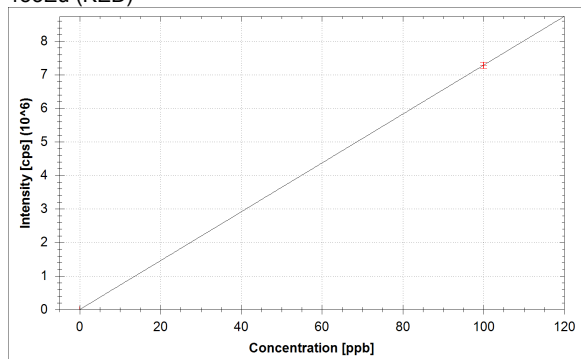

$$f(x) = 72824.4167 \cdot x + 2.2222$$

$$R^2 = 1.0000$$

$$\text{BEC} = 0.000 \text{ ppb}$$

$$\text{LoD} = 0.0001 \text{ ppb}$$

**<sup>158</sup>Gd (KED)**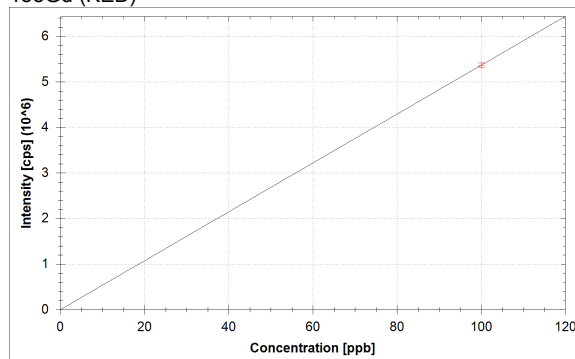

$$f(x) = 53633.3367 \cdot x$$

$$R^2 = 1.0000$$

$$\text{BEC} = 0.000 \text{ ppb}$$

$$\text{LoD} = 0.0000 \text{ ppb}$$

**<sup>164</sup>Dy (KED)**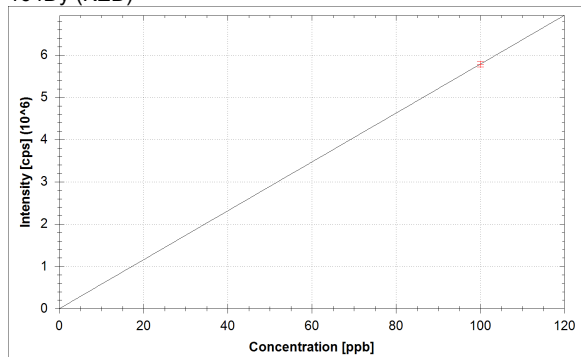

$$f(x) = 57825.7525 \cdot x$$

$$R^2 = 1.0000$$

$$\text{BEC} = 0.000 \text{ ppb}$$

$$\text{LoD} = 0.0000 \text{ ppb}$$

**<sup>165</sup>Ho (KED)**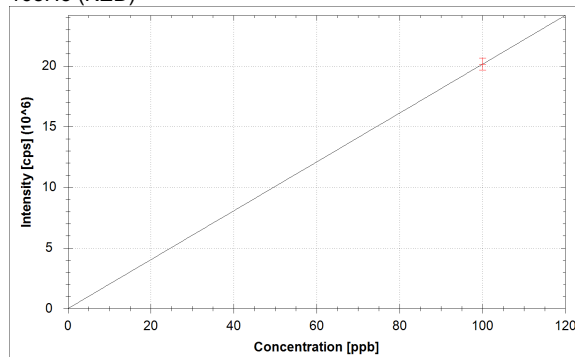

$$f(x) = 201390.2438 \cdot x$$

$$R^2 = 1.0000$$

$$\text{BEC} = 0.000 \text{ ppb}$$

$$\text{LoD} = 0.0000 \text{ ppb}$$

166Er (KED)

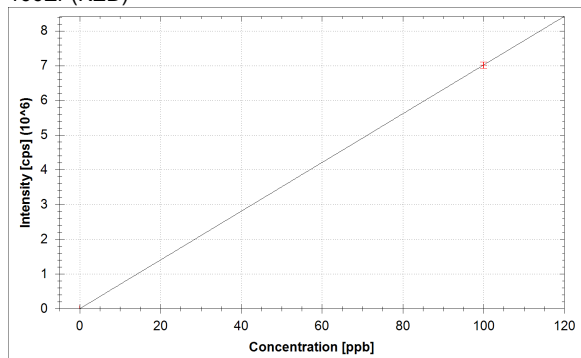

$$f(x) = 70144.0030 \cdot x + 44.4446$$

$$R^2 = 1.0000$$

$$\text{BEC} = 0.001 \text{ ppb}$$

$$\text{LoD} = 0.0003 \text{ ppb}$$

169Tm (KED)

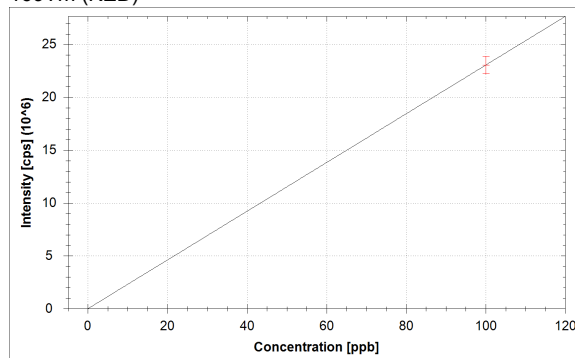

$$f(x) = 230511.5643 \cdot x + 3.3333$$

$$R^2 = 1.0000$$

$$\text{BEC} = 0.000 \text{ ppb}$$

$$\text{LoD} = 0.0000 \text{ ppb}$$

174Yb (KED)

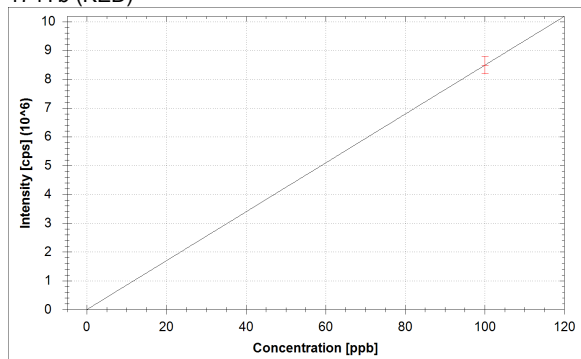

$$f(x) = 84834.6683 \cdot x + 5.5556$$

$$R^2 = 1.0000$$

$$\text{BEC} = 0.000 \text{ ppb}$$

$$\text{LoD} = 0.0002 \text{ ppb}$$

175Lu (KED)

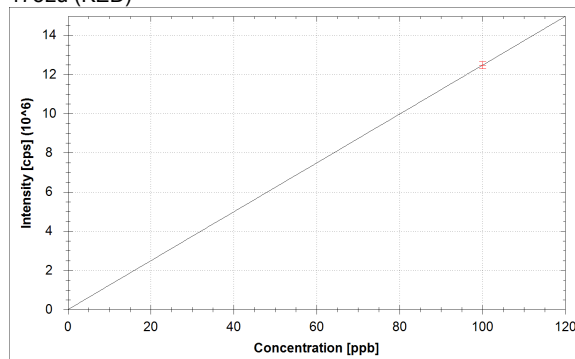

$$f(x) = 124704.1160 \cdot x$$

$$R^2 = 1.0000$$

$$\text{BEC} = 0.000 \text{ ppb}$$

$$\text{LoD} = 0.0000 \text{ ppb}$$

205Tl (KED)

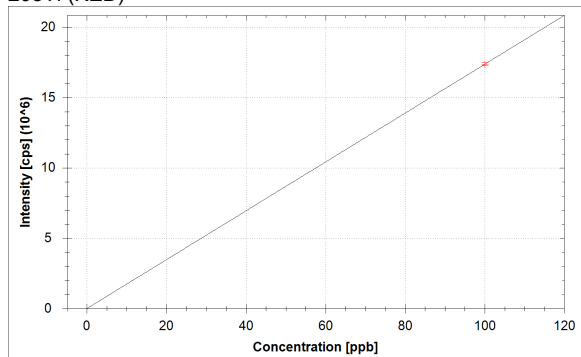

$$f(x) = 173664.5941 \cdot x + 10.0000$$

$$R^2 = 1.0000$$

$$\text{BEC} = 0.000 \text{ ppb}$$

$$\text{LoD} = 0.0001 \text{ ppb}$$

208Pb (KED)

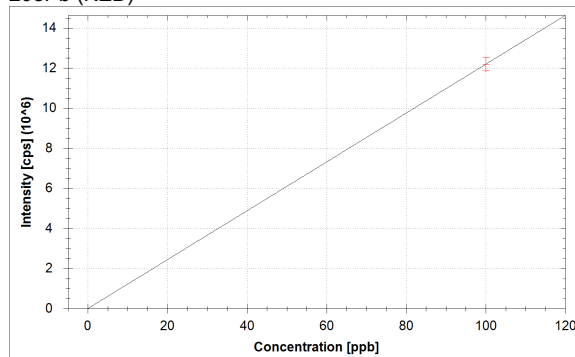

$$f(x) = 121907.5237 \cdot x + 1414.5274$$

$$R^2 = 1.0000$$

$$\text{BEC} = 0.012 \text{ ppb}$$

$$\text{LoD} = 0.0023 \text{ ppb}$$

232Th (KED)

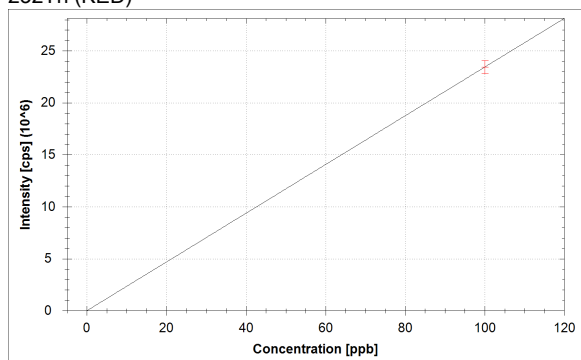

$$f(x) = 234395.1815 \cdot x + 402.2292$$

$$R^2 = 1.0000$$

$$\text{BEC} = 0.002 \text{ ppb}$$

$$\text{LoD} = 0.0006 \text{ ppb}$$

238U (KED)

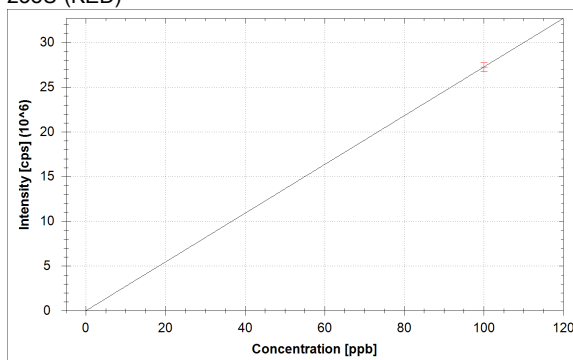

$$f(x) = 272420.7229 \cdot x + 17.7778$$

$$R^2 = 1.0000$$

$$\text{BEC} = 0.000 \text{ ppb}$$

$$\text{LoD} = 0.0001 \text{ ppb}$$

**Standards:**

Analysis Index: 3  
 Analysis Name: std1  
 Analysis Type: STD  
 Analysis Started at: 8/27/2021 4:35:07 PM  
 Standard (Stock): std1  
 Standard DF: 1

| Category    | Concentration average | Concentration RSD | Standard Concentration |
|-------------|-----------------------|-------------------|------------------------|
| 9Be (KED)   | 100.000 ppb           | 2.1 %             | 100.000 ppb            |
| 11B (KED)   | 100.000 ppb           | 2.7 %             | 100.000 ppb            |
| 24Mg (KED)  | 100.000 ppb           | 1.5 %             | 100.000 ppb            |
| 27Al (KED)  | 100.000 ppb           | 0.9 %             | 100.000 ppb            |
| 51V (KED)   | 100.000 ppb           | 0.9 %             | 100.000 ppb            |
| 52Cr (KED)  | 100.000 ppb           | 1.7 %             | 100.000 ppb            |
| 55Mn (KED)  | 100.000 ppb           | 1.1 %             | 100.000 ppb            |
| 56Fe (KED)  | 100.000 ppb           | 0.9 %             | 100.000 ppb            |
| 58Ni (KED)  | 100.000 ppb           | 1.0 %             | 100.000 ppb            |
| 59Co (KED)  | 100.000 ppb           | 0.9 %             | 100.000 ppb            |
| 63Cu (KED)  | 100.000 ppb           | 0.3 %             | 100.000 ppb            |
| 64Zn (KED)  | 100.000 ppb           | 1.7 %             | 100.000 ppb            |
| 69Ga (KED)  | 100.000 ppb           | 1.3 %             | 100.000 ppb            |
| 75As (KED)  | 100.000 ppb           | 1.9 %             | 100.000 ppb            |
| 80Se (KED)  | 100.000 ppb           | 1.8 %             | 100.000 ppb            |
| 85Rb (KED)  | 100.000 ppb           | 1.0 %             | 100.000 ppb            |
| 88Sr (KED)  | 100.000 ppb           | 0.8 %             | 100.000 ppb            |
| 107Ag (KED) | 100.000 ppb           | 1.3 %             | 100.000 ppb            |
| 114Cd (KED) | 100.000 ppb           | 1.4 %             | 100.000 ppb            |
| 133Cs (KED) | 100.000 ppb           | 2.5 %             | 100.000 ppb            |
| 138Ba (KED) | 100.000 ppb           | 0.9 %             | 100.000 ppb            |
| 139La (KED) | 100.000 ppb           | 0.6 %             | 100.000 ppb            |
| 140Ce (KED) | 100.000 ppb           | 1.7 %             | 100.000 ppb            |
| 141Pr (KED) | 100.000 ppb           | 0.9 %             | 100.000 ppb            |
| 142Nd (KED) | 100.000 ppb           | 1.1 %             | 100.000 ppb            |
| 152Sm (KED) | 100.000 ppb           | 2.6 %             | 100.000 ppb            |
| 153Eu (KED) | 100.000 ppb           | 1.3 %             | 100.000 ppb            |
| 158Gd (KED) | 100.000 ppb           | 0.9 %             | 100.000 ppb            |
| 164Dy (KED) | 100.000 ppb           | 1.1 %             | 100.000 ppb            |
| 165Ho (KED) | 100.000 ppb           | 2.4 %             | 100.000 ppb            |
| 166Er (KED) | 100.000 ppb           | 1.2 %             | 100.000 ppb            |
| 169Tm (KED) | 100.000 ppb           | 3.6 %             | 100.000 ppb            |
| 174Yb (KED) | 100.000 ppb           | 3.4 %             | 100.000 ppb            |
| 175Lu (KED) | 100.000 ppb           | 1.4 %             | 100.000 ppb            |
| 205Tl (KED) | 100.000 ppb           | 0.6 %             | 100.000 ppb            |
| 208Pb (KED) | 100.000 ppb           | 2.7 %             | 100.000 ppb            |
| 232Th (KED) | 100.000 ppb           | 2.7 %             | 100.000 ppb            |
| 238U (KED)  | 100.000 ppb           | 1.9 %             | 100.000 ppb            |

## Sample List Summary:

Instrument ID: iCAP Q

| Index: | Label:      | Main<br>Runs: | Survey<br>Runs: | Start Time:          | User name:                    |
|--------|-------------|---------------|-----------------|----------------------|-------------------------------|
| 1      | water       | 3             | 0               | 8/27/2021 4:29:10 PM | WINDOWS-UPCI4ER\Administrator |
| 2      | blk         | 3             | 0               | 8/27/2021 4:32:07 PM | WINDOWS-UPCI4ER\Administrator |
| 3      | std1        | 3             | 0               | 8/27/2021 4:35:07 PM | WINDOWS-UPCI4ER\Administrator |
| 4      | 1802151jian | 3             | 0               | 8/27/2021 4:38:13 PM | WINDOWS-UPCI4ER\Administrator |
| 5      | 1802161jian | 3             | 0               | 8/27/2021 4:41:23 PM | WINDOWS-UPCI4ER\Administrator |
| 6      | 18006ti     | 3             | 0               | 8/27/2021 4:44:30 PM | WINDOWS-UPCI4ER\Administrator |
| 7      | 1801234ti   | 3             | 0               | 8/27/2021 4:47:40 PM | WINDOWS-UPCI4ER\Administrator |
| 8      | 1802164jian | 3             | 0               | 8/27/2021 4:50:48 PM | WINDOWS-UPCI4ER\Administrator |
| 9      | 17010jian   | 3             | 0               | 8/27/2021 4:53:55 PM | WINDOWS-UPCI4ER\Administrator |
| 10     | 1802039jian | 3             | 0               | 8/27/2021 4:56:58 PM | WINDOWS-UPCI4ER\Administrator |
| 11     | 1705003jian | 3             | 0               | 8/27/2021 4:59:58 PM | WINDOWS-UPCI4ER\Administrator |
| 12     | 1802110jian | 3             | 0               | 8/27/2021 5:03:01 PM | WINDOWS-UPCI4ER\Administrator |
| 13     | 1702069jian | 3             | 0               | 8/27/2021 5:06:12 PM | WINDOWS-UPCI4ER\Administrator |
| 14     | 17012jian   | 3             | 0               | 8/27/2021 5:09:30 PM | WINDOWS-UPCI4ER\Administrator |
| 15     | 1801068jian | 3             | 0               | 8/27/2021 5:12:44 PM | WINDOWS-UPCI4ER\Administrator |
| 16     | 18008jian   | 3             | 0               | 8/27/2021 5:16:00 PM | WINDOWS-UPCI4ER\Administrator |
| 17     | 1701189jian | 3             | 0               | 8/27/2021 5:19:19 PM | WINDOWS-UPCI4ER\Administrator |
| 18     | 1701286jian | 3             | 0               | 8/27/2021 5:22:29 PM | WINDOWS-UPCI4ER\Administrator |
| 19     | 1701053jian | 3             | 0               | 8/27/2021 5:25:37 PM | WINDOWS-UPCI4ER\Administrator |
| 20     | 1702067jian | 3             | 0               | 8/27/2021 5:28:44 PM | WINDOWS-UPCI4ER\Administrator |
| 21     | 1801003jian | 3             | 0               | 8/27/2021 5:31:55 PM | WINDOWS-UPCI4ER\Administrator |
| 22     | 1705021jian | 3             | 0               | 8/27/2021 5:35:17 PM | WINDOWS-UPCI4ER\Administrator |
| 23     | 1802135jian | 3             | 0               | 8/27/2021 5:38:28 PM | WINDOWS-UPCI4ER\Administrator |

## Sample Summary

Instrument ID: iCAP Q

Analysis index: 1

Analysis name: water

Analysis started at: 8/27/2021 4:29:10 PM

User name: WINDOWS-UPCI4ER\Administrator

| Category    | Concentration average | Concentration RSD |
|-------------|-----------------------|-------------------|
| 9Be (KED)   | 0.000 ppb             |                   |
| 11B (KED)   | 1.439 ppb             | 14.3 %            |
| 24Mg (KED)  | 1.011 ppb             | 7.0 %             |
| 27Al (KED)  | -0.675 ppb            | 19.6 %            |
| 51V (KED)   | 0.000 ppb             | 0.0 %             |
| 52Cr (KED)  | 0.031 ppb             | 23.0 %            |
| 55Mn (KED)  | -0.010 ppb            | 27.0 %            |
| 56Fe (KED)  | -0.481 ppb            | 0.2 %             |
| 58Ni (KED)  | 0.059 ppb             | 10.7 %            |
| 59Co (KED)  | 0.004 ppb             | 19.5 %            |
| 63Cu (KED)  | -0.038 ppb            | 5.4 %             |
| 64Zn (KED)  | -0.154 ppb            | 1.3 %             |
| 69Ga (KED)  | -0.026 ppb            | 3.6 %             |
| 75As (KED)  | -0.045 ppb            | 9.0 %             |
| 80Se (KED)  | 0.201 ppb             | 95.4 %            |
| 85Rb (KED)  | -0.003 ppb            | 0.0 %             |
| 88Sr (KED)  | 0.014 ppb             | 16.9 %            |
| 107Ag (KED) | -0.002 ppb            | 3.2 %             |
| 114Cd (KED) | -0.002 ppb            | 6.7 %             |
| 133Cs (KED) | -0.003 ppb            | 7.5 %             |
| 138Ba (KED) | -0.074 ppb            | 2.3 %             |
| 139La (KED) | 0.000 ppb             | 0.0 %             |
| 140Ce (KED) | -0.001 ppb            | 2.8 %             |
| 141Pr (KED) | 0.000 ppb             | 0.0 %             |
| 142Nd (KED) | -0.001 ppb            | 0.0 %             |
| 152Sm (KED) | 0.000 ppb             | 0.0 %             |
| 153Eu (KED) | 0.000 ppb             | 173.2 %           |
| 158Gd (KED) | 0.000 ppb             |                   |
| 164Dy (KED) | 0.000 ppb             |                   |
| 165Ho (KED) | 0.000 ppb             |                   |
| 166Er (KED) | -0.001 ppb            | 4.4 %             |
| 169Tm (KED) | 0.000 ppb             | 0.0 %             |
| 174Yb (KED) | 0.000 ppb             | 0.0 %             |
| 175Lu (KED) | 0.000 ppb             |                   |
| 205Tl (KED) | 0.000 ppb             | 173.2 %           |
| 208Pb (KED) | -0.011 ppb            | 0.6 %             |
| 232Th (KED) | -0.002 ppb            | 0.0 %             |
| 238U (KED)  | 0.000 ppb             | 11.5 %            |

| Category   | Concentration average | Intensity average | Intensity RSD |
|------------|-----------------------|-------------------|---------------|
| 9Be (KED)  | 0.000 ppb             | 0 cps             |               |
| 11B (KED)  | 1.439 ppb             | 130 cps           | 10.3 %        |
| 24Mg (KED) | 1.011 ppb             | 659 cps           | 5.0 %         |
| 27Al (KED) | -0.675 ppb            | 13 cps            | 114.6 %       |
| 51V (KED)  | 0.000 ppb             | 7 cps             | 0.0 %         |
| 52Cr (KED) | 0.031 ppb             | 512 cps           | 16.2 %        |
| 55Mn (KED) | -0.010 ppb            | 183 cps           | 8.3 %         |
| 56Fe (KED) | -0.481 ppb            | 540 cps           | 2.2 %         |
| 58Ni (KED) | 0.059 ppb             | 2,611 cps         | 3.4 %         |
| 59Co (KED) | 0.004 ppb             | 93 cps            | 17.9 %        |

| Category    | Concentration average | Intensity average | Intensity RSD |
|-------------|-----------------------|-------------------|---------------|
| 63Cu (KED)  | -0.038 ppb            | 146 cps           | 24.7 %        |
| 64Zn (KED)  | -0.154 ppb            | 147 cps           | 6.0 %         |
| 69Ga (KED)  | -0.026 ppb            | 21 cps            | 24.1 %        |
| 75As (KED)  | -0.045 ppb            | 6 cps             | 91.7 %        |
| 80Se (KED)  | 0.201 ppb             | 903 cps           | 7.6 %         |
| 85Rb (KED)  | -0.003 ppb            | 30 cps            | 0.0 %         |
| 88Sr (KED)  | 0.014 ppb             | 178 cps           | 8.5 %         |
| 107Ag (KED) | -0.002 ppb            | 3 cps             | 100.0 %       |
| 114Cd (KED) | -0.002 ppb            | 1 cps             | 173.2 %       |
| 133Cs (KED) | -0.003 ppb            | 7 cps             | 86.6 %        |
| 138Ba (KED) | -0.074 ppb            | 589 cps           | 10.1 %        |
| 139La (KED) | 0.000 ppb             | 0 cps             |               |
| 140Ce (KED) | -0.001 ppb            | 2 cps             | 173.2 %       |
| 141Pr (KED) | 0.000 ppb             | 0 cps             |               |
| 142Nd (KED) | -0.001 ppb            | 0 cps             |               |
| 152Sm (KED) | 0.000 ppb             | 0 cps             |               |
| 153Eu (KED) | 0.000 ppb             | 1 cps             | 173.2 %       |
| 158Gd (KED) | 0.000 ppb             | 0 cps             |               |
| 164Dy (KED) | 0.000 ppb             | 0 cps             |               |
| 165Ho (KED) | 0.000 ppb             | 0 cps             |               |
| 166Er (KED) | -0.001 ppb            | 1 cps             | 173.2 %       |
| 169Tm (KED) | 0.000 ppb             | 0 cps             |               |
| 174Yb (KED) | 0.000 ppb             | 0 cps             |               |
| 175Lu (KED) | 0.000 ppb             | 0 cps             |               |
| 205Tl (KED) | 0.000 ppb             | 13 cps            | 43.3 %        |
| 208Pb (KED) | -0.011 ppb            | 28 cps            | 30.2 %        |
| 232Th (KED) | -0.002 ppb            | 7 cps             | 0.0 %         |
| 238U (KED)  | 0.000 ppb             | 1 cps             | 173.2 %       |

## Sample Summary

Instrument ID: iCAP Q

Analysis index: 2

Analysis name: blk

Analysis started at: 8/27/2021 4:32:07 PM

User name: WINDOWS-UPCI4ER\Administrator

| Category    | Concentration average | Concentration RSD |
|-------------|-----------------------|-------------------|
| 9Be (KED)   | 0.000 ppb             |                   |
| 11B (KED)   | 0.000 ppb             | 18.2 %            |
| 24Mg (KED)  | 0.000 ppb             | 6.4 %             |
| 27Al (KED)  | 0.000 ppb             | 37.4 %            |
| 51V (KED)   | 0.000 ppb             | 114.6 %           |
| 52Cr (KED)  | 0.000 ppb             | 20.0 %            |
| 55Mn (KED)  | 0.000 ppb             | 29.7 %            |
| 56Fe (KED)  | 0.000 ppb             | 12.3 %            |
| 58Ni (KED)  | 0.000 ppb             | 2.3 %             |
| 59Co (KED)  | 0.000 ppb             | 49.5 %            |
| 63Cu (KED)  | 0.000 ppb             | 17.1 %            |
| 64Zn (KED)  | 0.000 ppb             | 5.2 %             |
| 69Ga (KED)  | 0.000 ppb             | 10.4 %            |
| 75As (KED)  | 0.000 ppb             | 34.4 %            |
| 80Se (KED)  | 0.000 ppb             | 5.8 %             |
| 85Rb (KED)  | 0.000 ppb             | 26.6 %            |
| 88Sr (KED)  | 0.000 ppb             | 25.5 %            |
| 107Ag (KED) | 0.000 ppb             | 25.0 %            |
| 114Cd (KED) | 0.000 ppb             | 11.1 %            |
| 133Cs (KED) | 0.000 ppb             | 6.9 %             |
| 138Ba (KED) | 0.000 ppb             | 1.7 %             |
| 139La (KED) | 0.000 ppb             | 33.1 %            |
| 140Ce (KED) | 0.000 ppb             | 13.8 %            |
| 141Pr (KED) | 0.000 ppb             | 21.7 %            |
| 142Nd (KED) | 0.000 ppb             | 28.5 %            |
| 152Sm (KED) | 0.000 ppb             | 86.6 %            |
| 153Eu (KED) | 0.000 ppb             | 86.6 %            |
| 158Gd (KED) | 0.000 ppb             |                   |
| 164Dy (KED) | 0.000 ppb             |                   |
| 165Ho (KED) | 0.000 ppb             |                   |
| 166Er (KED) | 0.000 ppb             | 17.3 %            |
| 169Tm (KED) | 0.000 ppb             | 100.0 %           |
| 174Yb (KED) | 0.000 ppb             | 124.9 %           |
| 175Lu (KED) | 0.000 ppb             |                   |
| 205Tl (KED) | 0.000 ppb             | 57.7 %            |
| 208Pb (KED) | 0.000 ppb             | 6.5 %             |
| 232Th (KED) | 0.000 ppb             | 11.7 %            |
| 238U (KED)  | 0.000 ppb             | 47.2 %            |

| Category   | Concentration average | Intensity average | Intensity RSD |
|------------|-----------------------|-------------------|---------------|
| 9Be (KED)  | 0.000 ppb             | 0 cps             |               |
| 11B (KED)  | 0.000 ppb             | 37 cps            | 18.2 %        |
| 24Mg (KED) | 0.000 ppb             | 187 cps           | 6.4 %         |
| 27Al (KED) | 0.000 ppb             | 91 cps            | 37.4 %        |
| 51V (KED)  | 0.000 ppb             | 4 cps             | 114.6 %       |
| 52Cr (KED) | 0.000 ppb             | 150 cps           | 20.0 %        |
| 55Mn (KED) | 0.000 ppb             | 240 cps           | 29.7 %        |
| 56Fe (KED) | 0.000 ppb             | 5,570 cps         | 12.3 %        |
| 58Ni (KED) | 0.000 ppb             | 1,781 cps         | 2.3 %         |
| 59Co (KED) | 0.000 ppb             | 8 cps             | 49.5 %        |

| Category    | Concentration average | Intensity average | Intensity RSD |
|-------------|-----------------------|-------------------|---------------|
| 63Cu (KED)  | 0.000 ppb             | 814 cps           | 17.1 %        |
| 64Zn (KED)  | 0.000 ppb             | 804 cps           | 5.2 %         |
| 69Ga (KED)  | 0.000 ppb             | 161 cps           | 10.4 %        |
| 75As (KED)  | 0.000 ppb             | 62 cps            | 34.4 %        |
| 80Se (KED)  | 0.000 ppb             | 831 cps           | 5.8 %         |
| 85Rb (KED)  | 0.000 ppb             | 43 cps            | 26.6 %        |
| 88Sr (KED)  | 0.000 ppb             | 89 cps            | 25.5 %        |
| 107Ag (KED) | 0.000 ppb             | 108 cps           | 25.0 %        |
| 114Cd (KED) | 0.000 ppb             | 30 cps            | 11.1 %        |
| 133Cs (KED) | 0.000 ppb             | 83 cps            | 6.9 %         |
| 138Ba (KED) | 0.000 ppb             | 3,207 cps         | 1.7 %         |
| 139La (KED) | 0.000 ppb             | 27 cps            | 33.1 %        |
| 140Ce (KED) | 0.000 ppb             | 141 cps           | 13.8 %        |
| 141Pr (KED) | 0.000 ppb             | 9 cps             | 21.7 %        |
| 142Nd (KED) | 0.000 ppb             | 41 cps            | 28.5 %        |
| 152Sm (KED) | 0.000 ppb             | 4 cps             | 86.6 %        |
| 153Eu (KED) | 0.000 ppb             | 2 cps             | 86.6 %        |
| 158Gd (KED) | 0.000 ppb             | 0 cps             |               |
| 164Dy (KED) | 0.000 ppb             | 0 cps             |               |
| 165Ho (KED) | 0.000 ppb             | 0 cps             |               |
| 166Er (KED) | 0.000 ppb             | 44 cps            | 17.3 %        |
| 169Tm (KED) | 0.000 ppb             | 3 cps             | 100.0 %       |
| 174Yb (KED) | 0.000 ppb             | 6 cps             | 124.9 %       |
| 175Lu (KED) | 0.000 ppb             | 0 cps             |               |
| 205Tl (KED) | 0.000 ppb             | 10 cps            | 57.7 %        |
| 208Pb (KED) | 0.000 ppb             | 1,415 cps         | 6.5 %         |
| 232Th (KED) | 0.000 ppb             | 402 cps           | 11.7 %        |
| 238U (KED)  | 0.000 ppb             | 18 cps            | 47.2 %        |

## Sample Summary

Instrument ID: iCAP Q

Analysis index: 3

Analysis name: std1

Analysis started at: 8/27/2021 4:35:07 PM

User name: WINDOWS-UPCI4ER\Administrator

| Category    | Concentration average | Concentration RSD |
|-------------|-----------------------|-------------------|
| 9Be (KED)   | 100.000 ppb           | 2.1 %             |
| 11B (KED)   | 100.000 ppb           | 2.7 %             |
| 24Mg (KED)  | 100.000 ppb           | 1.5 %             |
| 27Al (KED)  | 100.000 ppb           | 0.9 %             |
| 51V (KED)   | 100.000 ppb           | 0.9 %             |
| 52Cr (KED)  | 100.000 ppb           | 1.7 %             |
| 55Mn (KED)  | 100.000 ppb           | 1.1 %             |
| 56Fe (KED)  | 100.000 ppb           | 0.9 %             |
| 58Ni (KED)  | 100.000 ppb           | 1.0 %             |
| 59Co (KED)  | 100.000 ppb           | 0.9 %             |
| 63Cu (KED)  | 100.000 ppb           | 0.3 %             |
| 64Zn (KED)  | 100.000 ppb           | 1.7 %             |
| 69Ga (KED)  | 100.000 ppb           | 1.3 %             |
| 75As (KED)  | 100.000 ppb           | 1.9 %             |
| 80Se (KED)  | 100.000 ppb           | 1.8 %             |
| 85Rb (KED)  | 100.000 ppb           | 1.0 %             |
| 88Sr (KED)  | 100.000 ppb           | 0.8 %             |
| 107Ag (KED) | 100.000 ppb           | 1.3 %             |
| 114Cd (KED) | 100.000 ppb           | 1.4 %             |
| 133Cs (KED) | 100.000 ppb           | 2.5 %             |
| 138Ba (KED) | 100.000 ppb           | 0.9 %             |
| 139La (KED) | 100.000 ppb           | 0.6 %             |
| 140Ce (KED) | 100.000 ppb           | 1.7 %             |
| 141Pr (KED) | 100.000 ppb           | 0.9 %             |
| 142Nd (KED) | 100.000 ppb           | 1.1 %             |
| 152Sm (KED) | 100.000 ppb           | 2.6 %             |
| 153Eu (KED) | 100.000 ppb           | 1.3 %             |
| 158Gd (KED) | 100.000 ppb           | 0.9 %             |
| 164Dy (KED) | 100.000 ppb           | 1.1 %             |
| 165Ho (KED) | 100.000 ppb           | 2.4 %             |
| 166Er (KED) | 100.000 ppb           | 1.2 %             |
| 169Tm (KED) | 100.000 ppb           | 3.6 %             |
| 174Yb (KED) | 100.000 ppb           | 3.4 %             |
| 175Lu (KED) | 100.000 ppb           | 1.4 %             |
| 205Tl (KED) | 100.000 ppb           | 0.6 %             |
| 208Pb (KED) | 100.000 ppb           | 2.7 %             |
| 232Th (KED) | 100.000 ppb           | 2.7 %             |
| 238U (KED)  | 100.000 ppb           | 1.9 %             |

| Category   | Concentration average | Intensity average | Intensity RSD |
|------------|-----------------------|-------------------|---------------|
| 9Be (KED)  | 100.000 ppb           | 11,779 cps        | 2.1 %         |
| 11B (KED)  | 100.000 ppb           | 6,524 cps         | 2.7 %         |
| 24Mg (KED) | 100.000 ppb           | 46,902 cps        | 1.5 %         |
| 27Al (KED) | 100.000 ppb           | 11,609 cps        | 0.8 %         |
| 51V (KED)  | 100.000 ppb           | 745,849 cps       | 0.9 %         |
| 52Cr (KED) | 100.000 ppb           | 1,161,359 cps     | 1.7 %         |
| 55Mn (KED) | 100.000 ppb           | 543,121 cps       | 1.1 %         |
| 56Fe (KED) | 100.000 ppb           | 1,051,678 cps     | 0.9 %         |
| 58Ni (KED) | 100.000 ppb           | 1,405,201 cps     | 1.0 %         |
| 59Co (KED) | 100.000 ppb           | 2,276,524 cps     | 0.9 %         |

| Category    | Concentration average | Intensity average | Intensity RSD |
|-------------|-----------------------|-------------------|---------------|
| 63Cu (KED)  | 100.000 ppb           | 1,763,210 cps     | 0.3 %         |
| 64Zn (KED)  | 100.000 ppb           | 428,592 cps       | 1.7 %         |
| 69Ga (KED)  | 100.000 ppb           | 532,704 cps       | 1.3 %         |
| 75As (KED)  | 100.000 ppb           | 125,042 cps       | 1.9 %         |
| 80Se (KED)  | 100.000 ppb           | 36,778 cps        | 1.8 %         |
| 85Rb (KED)  | 100.000 ppb           | 475,986 cps       | 1.0 %         |
| 88Sr (KED)  | 100.000 ppb           | 649,502 cps       | 0.8 %         |
| 107Ag (KED) | 100.000 ppb           | 4,542,752 cps     | 1.3 %         |
| 114Cd (KED) | 100.000 ppb           | 1,716,152 cps     | 1.4 %         |
| 133Cs (KED) | 100.000 ppb           | 2,454,819 cps     | 2.5 %         |
| 138Ba (KED) | 100.000 ppb           | 3,526,978 cps     | 0.9 %         |
| 139La (KED) | 100.000 ppb           | 7,098,744 cps     | 0.6 %         |
| 140Ce (KED) | 100.000 ppb           | 9,597,453 cps     | 1.7 %         |
| 141Pr (KED) | 100.000 ppb           | 9,680,058 cps     | 0.9 %         |
| 142Nd (KED) | 100.000 ppb           | 4,198,759 cps     | 1.1 %         |
| 152Sm (KED) | 100.000 ppb           | 3,956,521 cps     | 2.6 %         |
| 153Eu (KED) | 100.000 ppb           | 7,282,444 cps     | 1.3 %         |
| 158Gd (KED) | 100.000 ppb           | 5,363,334 cps     | 0.9 %         |
| 164Dy (KED) | 100.000 ppb           | 5,782,575 cps     | 1.1 %         |
| 165Ho (KED) | 100.000 ppb           | 20,139,024 cps    | 2.4 %         |
| 166Er (KED) | 100.000 ppb           | 7,014,445 cps     | 1.2 %         |
| 169Tm (KED) | 100.000 ppb           | 23,051,160 cps    | 3.6 %         |
| 174Yb (KED) | 100.000 ppb           | 8,483,472 cps     | 3.4 %         |
| 175Lu (KED) | 100.000 ppb           | 12,470,412 cps    | 1.4 %         |
| 205Tl (KED) | 100.000 ppb           | 17,366,469 cps    | 0.6 %         |
| 208Pb (KED) | 100.000 ppb           | 12,192,167 cps    | 2.7 %         |
| 232Th (KED) | 100.000 ppb           | 23,439,920 cps    | 2.7 %         |
| 238U (KED)  | 100.000 ppb           | 27,242,090 cps    | 1.9 %         |

## Sample Summary

Instrument ID: iCAP Q

Analysis index: 4

Analysis name: 1802151jian

Analysis started at: 8/27/2021 4:38:13 PM

User name: WINDOWS-UPCI4ER\Administrator

| Category    | Concentration average | Concentration RSD |
|-------------|-----------------------|-------------------|
| 9Be (KED)   | 0.028 ppb             | 0.0 %             |
| 11B (KED)   | 3.340 ppb             | 8.1 %             |
| 24Mg (KED)  | 413.556 ppb           | 2.6 %             |
| 27Al (KED)  | 439.102 ppb           | 4.3 %             |
| 51V (KED)   | 0.825 ppb             | 4.5 %             |
| 52Cr (KED)  | 4.120 ppb             | 2.6 %             |
| 55Mn (KED)  | 14.643 ppb            | 0.8 %             |
| 56Fe (KED)  | 423.893 ppb           | 0.5 %             |
| 58Ni (KED)  | 2.626 ppb             | 3.0 %             |
| 59Co (KED)  | 0.208 ppb             | 1.4 %             |
| 63Cu (KED)  | 9.568 ppb             | 1.2 %             |
| 64Zn (KED)  | 142.986 ppb           | 1.4 %             |
| 69Ga (KED)  | 2.194 ppb             | 2.0 %             |
| 75As (KED)  | 0.784 ppb             | 5.0 %             |
| 80Se (KED)  | 1.852 ppb             | 7.0 %             |
| 85Rb (KED)  | 2.320 ppb             | 1.8 %             |
| 88Sr (KED)  | 5.511 ppb             | 0.9 %             |
| 107Ag (KED) | 0.115 ppb             | 3.7 %             |
| 114Cd (KED) | 0.302 ppb             | 3.8 %             |
| 133Cs (KED) | 0.091 ppb             | 2.6 %             |
| 138Ba (KED) | 7.983 ppb             | 2.4 %             |
| 139La (KED) | 0.455 ppb             | 3.3 %             |
| 140Ce (KED) | 0.963 ppb             | 3.5 %             |
| 141Pr (KED) | 0.115 ppb             | 1.8 %             |
| 142Nd (KED) | 0.580 ppb             | 1.4 %             |
| 152Sm (KED) | 0.082 ppb             | 7.2 %             |
| 153Eu (KED) | 0.019 ppb             | 15.4 %            |
| 158Gd (KED) | 0.072 ppb             | 7.5 %             |
| 164Dy (KED) | 0.055 ppb             | 5.6 %             |
| 165Ho (KED) | 0.012 ppb             | 10.2 %            |
| 166Er (KED) | 0.029 ppb             | 5.8 %             |
| 169Tm (KED) | 0.005 ppb             | 26.9 %            |
| 174Yb (KED) | 0.023 ppb             | 5.0 %             |
| 175Lu (KED) | 0.005 ppb             | 24.2 %            |
| 205Tl (KED) | 0.020 ppb             | 13.6 %            |
| 208Pb (KED) | 1.437 ppb             | 1.2 %             |
| 232Th (KED) | 0.269 ppb             | 17.9 %            |
| 238U (KED)  | 0.039 ppb             | 15.0 %            |

| Category   | Concentration average | Intensity average | Intensity RSD |
|------------|-----------------------|-------------------|---------------|
| 9Be (KED)  | 0.028 ppb             | 3 cps             | 0.0 %         |
| 11B (KED)  | 3.340 ppb             | 253 cps           | 7.0 %         |
| 24Mg (KED) | 413.556 ppb           | 193,383 cps       | 2.6 %         |
| 27Al (KED) | 439.102 ppb           | 50,665 cps        | 4.3 %         |
| 51V (KED)  | 0.825 ppb             | 6,159 cps         | 4.5 %         |
| 52Cr (KED) | 4.120 ppb             | 47,992 cps        | 2.6 %         |
| 55Mn (KED) | 14.643 ppb            | 79,734 cps        | 0.8 %         |
| 56Fe (KED) | 423.893 ppb           | 4,439,945 cps     | 0.5 %         |
| 58Ni (KED) | 2.626 ppb             | 38,641 cps        | 2.8 %         |
| 59Co (KED) | 0.208 ppb             | 4,745 cps         | 1.4 %         |

| Category    | Concentration average | Intensity average | Intensity RSD |
|-------------|-----------------------|-------------------|---------------|
| 63Cu (KED)  | 9.568 ppb             | 169,447 cps       | 1.2 %         |
| 64Zn (KED)  | 142.986 ppb           | 612,482 cps       | 1.4 %         |
| 69Ga (KED)  | 2.194 ppb             | 11,843 cps        | 2.0 %         |
| 75As (KED)  | 0.784 ppb             | 1,042 cps         | 4.7 %         |
| 80Se (KED)  | 1.852 ppb             | 1,497 cps         | 3.1 %         |
| 85Rb (KED)  | 2.320 ppb             | 11,086 cps        | 1.8 %         |
| 88Sr (KED)  | 5.511 ppb             | 35,879 cps        | 0.9 %         |
| 107Ag (KED) | 0.115 ppb             | 5,320 cps         | 3.7 %         |
| 114Cd (KED) | 0.302 ppb             | 5,206 cps         | 3.7 %         |
| 133Cs (KED) | 0.091 ppb             | 2,306 cps         | 2.5 %         |
| 138Ba (KED) | 7.983 ppb             | 284,494 cps       | 2.4 %         |
| 139La (KED) | 0.455 ppb             | 32,327 cps        | 3.3 %         |
| 140Ce (KED) | 0.963 ppb             | 92,599 cps        | 3.5 %         |
| 141Pr (KED) | 0.115 ppb             | 11,169 cps        | 1.8 %         |
| 142Nd (KED) | 0.580 ppb             | 24,402 cps        | 1.4 %         |
| 152Sm (KED) | 0.082 ppb             | 3,229 cps         | 7.2 %         |
| 153Eu (KED) | 0.019 ppb             | 1,385 cps         | 15.4 %        |
| 158Gd (KED) | 0.072 ppb             | 3,867 cps         | 7.5 %         |
| 164Dy (KED) | 0.055 ppb             | 3,179 cps         | 5.6 %         |
| 165Ho (KED) | 0.012 ppb             | 2,352 cps         | 10.2 %        |
| 166Er (KED) | 0.029 ppb             | 2,088 cps         | 5.7 %         |
| 169Tm (KED) | 0.005 ppb             | 1,219 cps         | 26.9 %        |
| 174Yb (KED) | 0.023 ppb             | 1,958 cps         | 5.0 %         |
| 175Lu (KED) | 0.005 ppb             | 610 cps           | 24.2 %        |
| 205Tl (KED) | 0.020 ppb             | 3,417 cps         | 13.5 %        |
| 208Pb (KED) | 1.437 ppb             | 176,555 cps       | 1.2 %         |
| 232Th (KED) | 0.269 ppb             | 63,377 cps        | 17.8 %        |
| 238U (KED)  | 0.039 ppb             | 10,769 cps        | 15.0 %        |

## Sample Summary

Instrument ID: iCAP Q

Analysis index: 5

Analysis name: 1802161jian

Analysis started at: 8/27/2021 4:41:23 PM

User name: WINDOWS-UPCI4ER\Administrator

| Category    | Concentration average | Concentration RSD |
|-------------|-----------------------|-------------------|
| 9Be (KED)   | 0.057 ppb             | 0.0 %             |
| 11B (KED)   | 8.718 ppb             | 10.3 %            |
| 24Mg (KED)  | 439.113 ppb           | 1.0 %             |
| 27Al (KED)  | 461.508 ppb           | 2.2 %             |
| 51V (KED)   | 0.877 ppb             | 3.0 %             |
| 52Cr (KED)  | 1.993 ppb             | 0.6 %             |
| 55Mn (KED)  | 16.329 ppb            | 0.9 %             |
| 56Fe (KED)  | 430.301 ppb           | 1.0 %             |
| 58Ni (KED)  | 2.721 ppb             | 1.1 %             |
| 59Co (KED)  | 0.242 ppb             | 1.2 %             |
| 63Cu (KED)  | 9.253 ppb             | 1.0 %             |
| 64Zn (KED)  | 170.529 ppb           | 1.0 %             |
| 69Ga (KED)  | 2.516 ppb             | 2.3 %             |
| 75As (KED)  | 0.688 ppb             | 5.8 %             |
| 80Se (KED)  | 2.900 ppb             | 6.8 %             |
| 85Rb (KED)  | 2.175 ppb             | 2.9 %             |
| 88Sr (KED)  | 5.604 ppb             | 1.4 %             |
| 107Ag (KED) | 0.116 ppb             | 3.0 %             |
| 114Cd (KED) | 0.523 ppb             | 0.1 %             |
| 133Cs (KED) | 0.080 ppb             | 2.4 %             |
| 138Ba (KED) | 8.321 ppb             | 2.1 %             |
| 139La (KED) | 0.386 ppb             | 1.4 %             |
| 140Ce (KED) | 0.807 ppb             | 1.4 %             |
| 141Pr (KED) | 0.097 ppb             | 1.2 %             |
| 142Nd (KED) | 0.493 ppb             | 1.4 %             |
| 152Sm (KED) | 0.071 ppb             | 3.3 %             |
| 153Eu (KED) | 0.015 ppb             | 5.6 %             |
| 158Gd (KED) | 0.061 ppb             | 2.8 %             |
| 164Dy (KED) | 0.046 ppb             | 12.5 %            |
| 165Ho (KED) | 0.009 ppb             | 5.0 %             |
| 166Er (KED) | 0.029 ppb             | 10.0 %            |
| 169Tm (KED) | 0.003 ppb             | 7.8 %             |
| 174Yb (KED) | 0.020 ppb             | 1.5 %             |
| 175Lu (KED) | 0.003 ppb             | 5.8 %             |
| 205Tl (KED) | 0.014 ppb             | 2.9 %             |
| 208Pb (KED) | 1.075 ppb             | 2.1 %             |
| 232Th (KED) | 0.151 ppb             | 1.8 %             |
| 238U (KED)  | 0.028 ppb             | 5.1 %             |

| Category   | Concentration average | Intensity average | Intensity RSD |
|------------|-----------------------|-------------------|---------------|
| 9Be (KED)  | 0.057 ppb             | 7 cps             | 0.0 %         |
| 11B (KED)  | 8.718 ppb             | 602 cps           | 9.7 %         |
| 24Mg (KED) | 439.113 ppb           | 205,322 cps       | 1.0 %         |
| 27Al (KED) | 461.508 ppb           | 53,246 cps        | 2.2 %         |
| 51V (KED)  | 0.877 ppb             | 6,547 cps         | 3.0 %         |
| 52Cr (KED) | 1.993 ppb             | 23,297 cps        | 0.6 %         |
| 55Mn (KED) | 16.329 ppb            | 88,886 cps        | 0.9 %         |
| 56Fe (KED) | 430.301 ppb           | 4,506,986 cps     | 1.0 %         |
| 58Ni (KED) | 2.721 ppb             | 39,963 cps        | 1.0 %         |
| 59Co (KED) | 0.242 ppb             | 5,527 cps         | 1.2 %         |

| Category    | Concentration average | Intensity average | Intensity RSD |
|-------------|-----------------------|-------------------|---------------|
| 63Cu (KED)  | 9.253 ppb             | 163,882 cps       | 1.0 %         |
| 64Zn (KED)  | 170.529 ppb           | 730,305 cps       | 1.0 %         |
| 69Ga (KED)  | 2.516 ppb             | 13,558 cps        | 2.3 %         |
| 75As (KED)  | 0.688 ppb             | 922 cps           | 5.4 %         |
| 80Se (KED)  | 2.900 ppb             | 1,873 cps         | 3.8 %         |
| 85Rb (KED)  | 2.175 ppb             | 10,395 cps        | 2.9 %         |
| 88Sr (KED)  | 5.604 ppb             | 36,481 cps        | 1.4 %         |
| 107Ag (KED) | 0.116 ppb             | 5,381 cps         | 2.9 %         |
| 114Cd (KED) | 0.523 ppb             | 9,008 cps         | 0.1 %         |
| 133Cs (KED) | 0.080 ppb             | 2,037 cps         | 2.3 %         |
| 138Ba (KED) | 8.321 ppb             | 296,421 cps       | 2.0 %         |
| 139La (KED) | 0.386 ppb             | 27,450 cps        | 1.4 %         |
| 140Ce (KED) | 0.807 ppb             | 77,582 cps        | 1.4 %         |
| 141Pr (KED) | 0.097 ppb             | 9,397 cps         | 1.2 %         |
| 142Nd (KED) | 0.493 ppb             | 20,733 cps        | 1.4 %         |
| 152Sm (KED) | 0.071 ppb             | 2,797 cps         | 3.3 %         |
| 153Eu (KED) | 0.015 ppb             | 1,090 cps         | 5.6 %         |
| 158Gd (KED) | 0.061 ppb             | 3,293 cps         | 2.8 %         |
| 164Dy (KED) | 0.046 ppb             | 2,631 cps         | 12.5 %        |
| 165Ho (KED) | 0.009 ppb             | 1,857 cps         | 5.0 %         |
| 166Er (KED) | 0.029 ppb             | 2,065 cps         | 9.7 %         |
| 169Tm (KED) | 0.003 ppb             | 794 cps           | 7.8 %         |
| 174Yb (KED) | 0.020 ppb             | 1,682 cps         | 1.5 %         |
| 175Lu (KED) | 0.003 ppb             | 417 cps           | 5.8 %         |
| 205Tl (KED) | 0.014 ppb             | 2,389 cps         | 2.9 %         |
| 208Pb (KED) | 1.075 ppb             | 132,493 cps       | 2.1 %         |
| 232Th (KED) | 0.151 ppb             | 35,884 cps        | 1.8 %         |
| 238U (KED)  | 0.028 ppb             | 7,576 cps         | 5.1 %         |

## Sample Summary

Instrument ID: iCAP Q

Analysis index: 6

Analysis name: 18006ti

Analysis started at: 8/27/2021 4:44:30 PM

User name: WINDOWS-UPCI4ER\Administrator

| Category    | Concentration average | Concentration RSD |
|-------------|-----------------------|-------------------|
| 9Be (KED)   | 0.019 ppb             | 173.2 %           |
| 11B (KED)   | 9.489 ppb             | 10.7 %            |
| 24Mg (KED)  | 617.434 ppb           | 2.9 %             |
| 27Al (KED)  | 655.494 ppb           | 2.9 %             |
| 51V (KED)   | 1.316 ppb             | 4.2 %             |
| 52Cr (KED)  | 1.780 ppb             | 0.6 %             |
| 55Mn (KED)  | 19.473 ppb            | 2.2 %             |
| 56Fe (KED)  | 524.052 ppb           | 1.1 %             |
| 58Ni (KED)  | 2.504 ppb             | 2.7 %             |
| 59Co (KED)  | 0.290 ppb             | 4.4 %             |
| 63Cu (KED)  | 8.637 ppb             | 2.7 %             |
| 64Zn (KED)  | 175.397 ppb           | 1.8 %             |
| 69Ga (KED)  | 3.192 ppb             | 3.6 %             |
| 75As (KED)  | 0.573 ppb             | 7.2 %             |
| 80Se (KED)  | 2.897 ppb             | 6.6 %             |
| 85Rb (KED)  | 2.585 ppb             | 1.7 %             |
| 88Sr (KED)  | 7.084 ppb             | 2.9 %             |
| 107Ag (KED) | 0.118 ppb             | 2.3 %             |
| 114Cd (KED) | 0.383 ppb             | 2.5 %             |
| 133Cs (KED) | 0.106 ppb             | 0.4 %             |
| 138Ba (KED) | 10.063 ppb            | 6.5 %             |
| 139La (KED) | 0.553 ppb             | 1.5 %             |
| 140Ce (KED) | 1.107 ppb             | 3.4 %             |
| 141Pr (KED) | 0.135 ppb             | 3.8 %             |
| 142Nd (KED) | 0.666 ppb             | 0.5 %             |
| 152Sm (KED) | 0.102 ppb             | 4.4 %             |
| 153Eu (KED) | 0.023 ppb             | 8.6 %             |
| 158Gd (KED) | 0.089 ppb             | 4.7 %             |
| 164Dy (KED) | 0.066 ppb             | 1.9 %             |
| 165Ho (KED) | 0.012 ppb             | 5.0 %             |
| 166Er (KED) | 0.036 ppb             | 2.9 %             |
| 169Tm (KED) | 0.004 ppb             | 2.7 %             |
| 174Yb (KED) | 0.028 ppb             | 4.7 %             |
| 175Lu (KED) | 0.004 ppb             | 7.9 %             |
| 205Tl (KED) | 0.009 ppb             | 7.4 %             |
| 208Pb (KED) | 0.862 ppb             | 3.2 %             |
| 232Th (KED) | 0.173 ppb             | 3.4 %             |
| 238U (KED)  | 0.034 ppb             | 37.0 %            |

| Category   | Concentration average | Intensity average | Intensity RSD |
|------------|-----------------------|-------------------|---------------|
| 9Be (KED)  | 0.019 ppb             | 2 cps             | 173.2 %       |
| 11B (KED)  | 9.489 ppb             | 652 cps           | 10.1 %        |
| 24Mg (KED) | 617.434 ppb           | 288,626 cps       | 2.9 %         |
| 27Al (KED) | 655.494 ppb           | 75,588 cps        | 2.9 %         |
| 51V (KED)  | 1.316 ppb             | 9,823 cps         | 4.2 %         |
| 52Cr (KED) | 1.780 ppb             | 20,821 cps        | 0.6 %         |
| 55Mn (KED) | 19.473 ppb            | 105,956 cps       | 2.2 %         |
| 56Fe (KED) | 524.052 ppb           | 5,487,723 cps     | 1.1 %         |
| 58Ni (KED) | 2.504 ppb             | 36,919 cps        | 2.6 %         |
| 59Co (KED) | 0.290 ppb             | 6,610 cps         | 4.4 %         |

| Category    | Concentration average | Intensity average | Intensity RSD |
|-------------|-----------------------|-------------------|---------------|
| 63Cu (KED)  | 8.637 ppb             | 153,033 cps       | 2.7 %         |
| 64Zn (KED)  | 175.397 ppb           | 751,128 cps       | 1.8 %         |
| 69Ga (KED)  | 3.192 ppb             | 17,162 cps        | 3.6 %         |
| 75As (KED)  | 0.573 ppb             | 778 cps           | 6.6 %         |
| 80Se (KED)  | 2.897 ppb             | 1,872 cps         | 3.7 %         |
| 85Rb (KED)  | 2.585 ppb             | 12,345 cps        | 1.7 %         |
| 88Sr (KED)  | 7.084 ppb             | 46,094 cps        | 2.9 %         |
| 107Ag (KED) | 0.118 ppb             | 5,476 cps         | 2.3 %         |
| 114Cd (KED) | 0.383 ppb             | 6,601 cps         | 2.5 %         |
| 133Cs (KED) | 0.106 ppb             | 2,683 cps         | 0.4 %         |
| 138Ba (KED) | 10.063 ppb            | 357,814 cps       | 6.4 %         |
| 139La (KED) | 0.553 ppb             | 39,271 cps        | 1.5 %         |
| 140Ce (KED) | 1.107 ppb             | 106,413 cps       | 3.4 %         |
| 141Pr (KED) | 0.135 ppb             | 13,080 cps        | 3.8 %         |
| 142Nd (KED) | 0.666 ppb             | 27,991 cps        | 0.5 %         |
| 152Sm (KED) | 0.102 ppb             | 4,022 cps         | 4.4 %         |
| 153Eu (KED) | 0.023 ppb             | 1,641 cps         | 8.6 %         |
| 158Gd (KED) | 0.089 ppb             | 4,786 cps         | 4.7 %         |
| 164Dy (KED) | 0.066 ppb             | 3,834 cps         | 1.9 %         |
| 165Ho (KED) | 0.012 ppb             | 2,512 cps         | 5.0 %         |
| 166Er (KED) | 0.036 ppb             | 2,574 cps         | 2.9 %         |
| 169Tm (KED) | 0.004 ppb             | 1,038 cps         | 2.7 %         |
| 174Yb (KED) | 0.028 ppb             | 2,402 cps         | 4.7 %         |
| 175Lu (KED) | 0.004 ppb             | 500 cps           | 7.9 %         |
| 205Tl (KED) | 0.009 ppb             | 1,605 cps         | 7.4 %         |
| 208Pb (KED) | 0.862 ppb             | 106,478 cps       | 3.2 %         |
| 232Th (KED) | 0.173 ppb             | 40,970 cps        | 3.4 %         |
| 238U (KED)  | 0.034 ppb             | 9,407 cps         | 36.9 %        |

## Sample Summary

Instrument ID: iCAP Q

Analysis index: 7

Analysis name: 1801234ti

Analysis started at: 8/27/2021 4:47:40 PM

User name: WINDOWS-UPCI4ER\Administrator

| Category    | Concentration average | Concentration RSD |
|-------------|-----------------------|-------------------|
| 9Be (KED)   | 0.019 ppb             | 86.6 %            |
| 11B (KED)   | 3.186 ppb             | 28.0 %            |
| 24Mg (KED)  | 570.647 ppb           | 1.7 %             |
| 27Al (KED)  | 469.026 ppb           | 0.6 %             |
| 51V (KED)   | 0.875 ppb             | 1.4 %             |
| 52Cr (KED)  | 1.384 ppb             | 18.7 %            |
| 55Mn (KED)  | 15.388 ppb            | 1.2 %             |
| 56Fe (KED)  | 389.484 ppb           | 1.4 %             |
| 58Ni (KED)  | 2.048 ppb             | 1.4 %             |
| 59Co (KED)  | 0.551 ppb             | 105.7 %           |
| 63Cu (KED)  | 14.304 ppb            | 0.6 %             |
| 64Zn (KED)  | 186.849 ppb           | 1.0 %             |
| 69Ga (KED)  | 3.082 ppb             | 1.3 %             |
| 75As (KED)  | 0.467 ppb             | 5.6 %             |
| 80Se (KED)  | 5.305 ppb             | 7.5 %             |
| 85Rb (KED)  | 2.544 ppb             | 1.9 %             |
| 88Sr (KED)  | 6.418 ppb             | 2.0 %             |
| 107Ag (KED) | 0.185 ppb             | 0.3 %             |
| 114Cd (KED) | 0.758 ppb             | 0.4 %             |
| 133Cs (KED) | 0.074 ppb             | 2.7 %             |
| 138Ba (KED) | 9.383 ppb             | 2.5 %             |
| 139La (KED) | 0.369 ppb             | 2.0 %             |
| 140Ce (KED) | 0.743 ppb             | 1.7 %             |
| 141Pr (KED) | 0.092 ppb             | 1.4 %             |
| 142Nd (KED) | 0.464 ppb             | 1.3 %             |
| 152Sm (KED) | 0.067 ppb             | 3.8 %             |
| 153Eu (KED) | 0.015 ppb             | 2.4 %             |
| 158Gd (KED) | 0.061 ppb             | 3.9 %             |
| 164Dy (KED) | 0.045 ppb             | 9.1 %             |
| 165Ho (KED) | 0.008 ppb             | 2.8 %             |
| 166Er (KED) | 0.027 ppb             | 1.4 %             |
| 169Tm (KED) | 0.003 ppb             | 1.3 %             |
| 174Yb (KED) | 0.019 ppb             | 4.1 %             |
| 175Lu (KED) | 0.003 ppb             | 26.7 %            |
| 205Tl (KED) | 0.012 ppb             | 3.7 %             |
| 208Pb (KED) | 1.007 ppb             | 1.5 %             |
| 232Th (KED) | 0.115 ppb             | 2.2 %             |
| 238U (KED)  | 0.027 ppb             | 19.8 %            |

| Category   | Concentration average | Intensity average | Intensity RSD |
|------------|-----------------------|-------------------|---------------|
| 9Be (KED)  | 0.019 ppb             | 2 cps             | 86.6 %        |
| 11B (KED)  | 3.186 ppb             | 243 cps           | 23.8 %        |
| 24Mg (KED) | 570.647 ppb           | 266,769 cps       | 1.7 %         |
| 27Al (KED) | 469.026 ppb           | 54,112 cps        | 0.6 %         |
| 51V (KED)  | 0.875 ppb             | 6,527 cps         | 1.4 %         |
| 52Cr (KED) | 1.384 ppb             | 16,220 cps        | 18.5 %        |
| 55Mn (KED) | 15.388 ppb            | 83,778 cps        | 1.1 %         |
| 56Fe (KED) | 389.484 ppb           | 4,079,996 cps     | 1.4 %         |
| 58Ni (KED) | 2.048 ppb             | 30,524 cps        | 1.3 %         |
| 59Co (KED) | 0.551 ppb             | 12,541 cps        | 105.7 %       |

| Category    | Concentration average | Intensity average | Intensity RSD |
|-------------|-----------------------|-------------------|---------------|
| 63Cu (KED)  | 14.304 ppb            | 252,905 cps       | 0.6 %         |
| 64Zn (KED)  | 186.849 ppb           | 800,119 cps       | 1.0 %         |
| 69Ga (KED)  | 3.082 ppb             | 16,574 cps        | 1.3 %         |
| 75As (KED)  | 0.467 ppb             | 646 cps           | 5.1 %         |
| 80Se (KED)  | 5.305 ppb             | 2,738 cps         | 5.2 %         |
| 85Rb (KED)  | 2.544 ppb             | 12,151 cps        | 1.9 %         |
| 88Sr (KED)  | 6.418 ppb             | 41,767 cps        | 2.0 %         |
| 107Ag (KED) | 0.185 ppb             | 8,530 cps         | 0.3 %         |
| 114Cd (KED) | 0.758 ppb             | 13,042 cps        | 0.4 %         |
| 133Cs (KED) | 0.074 ppb             | 1,907 cps         | 2.6 %         |
| 138Ba (KED) | 9.383 ppb             | 333,844 cps       | 2.5 %         |
| 139La (KED) | 0.369 ppb             | 26,241 cps        | 2.0 %         |
| 140Ce (KED) | 0.743 ppb             | 71,493 cps        | 1.7 %         |
| 141Pr (KED) | 0.092 ppb             | 8,939 cps         | 1.4 %         |
| 142Nd (KED) | 0.464 ppb             | 19,524 cps        | 1.3 %         |
| 152Sm (KED) | 0.067 ppb             | 2,641 cps         | 3.7 %         |
| 153Eu (KED) | 0.015 ppb             | 1,127 cps         | 2.4 %         |
| 158Gd (KED) | 0.061 ppb             | 3,260 cps         | 3.9 %         |
| 164Dy (KED) | 0.045 ppb             | 2,603 cps         | 9.1 %         |
| 165Ho (KED) | 0.008 ppb             | 1,693 cps         | 2.8 %         |
| 166Er (KED) | 0.027 ppb             | 1,907 cps         | 1.3 %         |
| 169Tm (KED) | 0.003 ppb             | 734 cps           | 1.3 %         |
| 174Yb (KED) | 0.019 ppb             | 1,580 cps         | 4.1 %         |
| 175Lu (KED) | 0.003 ppb             | 329 cps           | 26.7 %        |
| 205Tl (KED) | 0.012 ppb             | 2,060 cps         | 3.7 %         |
| 208Pb (KED) | 1.007 ppb             | 124,196 cps       | 1.5 %         |
| 232Th (KED) | 0.115 ppb             | 27,291 cps        | 2.2 %         |
| 238U (KED)  | 0.027 ppb             | 7,472 cps         | 19.7 %        |

## Sample Summary

Instrument ID: iCAP Q

Analysis index: 8

Analysis name: 1802164jian

Analysis started at: 8/27/2021 4:50:48 PM

User name: WINDOWS-UPCI4ER\Administrator

| Category    | Concentration average | Concentration RSD |
|-------------|-----------------------|-------------------|
| 9Be (KED)   | 0.000 ppb             |                   |
| 11B (KED)   | 3.014 ppb             | 11.6 %            |
| 24Mg (KED)  | 444.851 ppb           | 0.7 %             |
| 27Al (KED)  | 465.150 ppb           | 0.7 %             |
| 51V (KED)   | 0.858 ppb             | 4.0 %             |
| 52Cr (KED)  | 1.468 ppb             | 2.2 %             |
| 55Mn (KED)  | 13.144 ppb            | 1.4 %             |
| 56Fe (KED)  | 407.358 ppb           | 1.3 %             |
| 58Ni (KED)  | 2.108 ppb             | 3.3 %             |
| 59Co (KED)  | 0.203 ppb             | 0.3 %             |
| 63Cu (KED)  | 10.013 ppb            | 0.7 %             |
| 64Zn (KED)  | 164.841 ppb           | 0.3 %             |
| 69Ga (KED)  | 2.668 ppb             | 3.4 %             |
| 75As (KED)  | 0.738 ppb             | 22.4 %            |
| 80Se (KED)  | 3.503 ppb             | 6.8 %             |
| 85Rb (KED)  | 2.820 ppb             | 1.2 %             |
| 88Sr (KED)  | 5.385 ppb             | 2.7 %             |
| 107Ag (KED) | 0.143 ppb             | 1.8 %             |
| 114Cd (KED) | 0.541 ppb             | 1.9 %             |
| 133Cs (KED) | 0.084 ppb             | 1.4 %             |
| 138Ba (KED) | 8.063 ppb             | 0.8 %             |
| 139La (KED) | 0.375 ppb             | 1.3 %             |
| 140Ce (KED) | 0.788 ppb             | 1.9 %             |
| 141Pr (KED) | 0.091 ppb             | 0.5 %             |
| 142Nd (KED) | 0.459 ppb             | 1.6 %             |
| 152Sm (KED) | 0.064 ppb             | 2.2 %             |
| 153Eu (KED) | 0.015 ppb             | 1.2 %             |
| 158Gd (KED) | 0.058 ppb             | 3.2 %             |
| 164Dy (KED) | 0.045 ppb             | 4.2 %             |
| 165Ho (KED) | 0.008 ppb             | 1.9 %             |
| 166Er (KED) | 0.023 ppb             | 2.2 %             |
| 169Tm (KED) | 0.003 ppb             | 11.9 %            |
| 174Yb (KED) | 0.019 ppb             | 3.9 %             |
| 175Lu (KED) | 0.003 ppb             | 4.3 %             |
| 205Tl (KED) | 0.012 ppb             | 8.4 %             |
| 208Pb (KED) | 1.132 ppb             | 1.0 %             |
| 232Th (KED) | 0.111 ppb             | 3.3 %             |
| 238U (KED)  | 0.022 ppb             | 4.6 %             |

| Category   | Concentration average | Intensity average | Intensity RSD |
|------------|-----------------------|-------------------|---------------|
| 9Be (KED)  | 0.000 ppb             | 0 cps             |               |
| 11B (KED)  | 3.014 ppb             | 232 cps           | 9.8 %         |
| 24Mg (KED) | 444.851 ppb           | 208,002 cps       | 0.7 %         |
| 27Al (KED) | 465.150 ppb           | 53,665 cps        | 0.7 %         |
| 51V (KED)  | 0.858 ppb             | 6,406 cps         | 4.0 %         |
| 52Cr (KED) | 1.468 ppb             | 17,200 cps        | 2.1 %         |
| 55Mn (KED) | 13.144 ppb            | 71,597 cps        | 1.4 %         |
| 56Fe (KED) | 407.358 ppb           | 4,266,974 cps     | 1.3 %         |
| 58Ni (KED) | 2.108 ppb             | 31,369 cps        | 3.1 %         |
| 59Co (KED) | 0.203 ppb             | 4,629 cps         | 0.3 %         |

| Category    | Concentration average | Intensity average | Intensity RSD |
|-------------|-----------------------|-------------------|---------------|
| 63Cu (KED)  | 10.013 ppb            | 177,289 cps       | 0.7 %         |
| 64Zn (KED)  | 164.841 ppb           | 705,974 cps       | 0.3 %         |
| 69Ga (KED)  | 2.668 ppb             | 14,367 cps        | 3.3 %         |
| 75As (KED)  | 0.738 ppb             | 985 cps           | 21.0 %        |
| 80Se (KED)  | 3.503 ppb             | 2,090 cps         | 4.1 %         |
| 85Rb (KED)  | 2.820 ppb             | 13,467 cps        | 1.2 %         |
| 88Sr (KED)  | 5.385 ppb             | 35,061 cps        | 2.7 %         |
| 107Ag (KED) | 0.143 ppb             | 6,611 cps         | 1.7 %         |
| 114Cd (KED) | 0.541 ppb             | 9,311 cps         | 1.9 %         |
| 133Cs (KED) | 0.084 ppb             | 2,147 cps         | 1.4 %         |
| 138Ba (KED) | 8.063 ppb             | 287,338 cps       | 0.8 %         |
| 139La (KED) | 0.375 ppb             | 26,655 cps        | 1.3 %         |
| 140Ce (KED) | 0.788 ppb             | 75,791 cps        | 1.9 %         |
| 141Pr (KED) | 0.091 ppb             | 8,771 cps         | 0.5 %         |
| 142Nd (KED) | 0.459 ppb             | 19,312 cps        | 1.6 %         |
| 152Sm (KED) | 0.064 ppb             | 2,525 cps         | 2.2 %         |
| 153Eu (KED) | 0.015 ppb             | 1,087 cps         | 1.2 %         |
| 158Gd (KED) | 0.058 ppb             | 3,112 cps         | 3.2 %         |
| 164Dy (KED) | 0.045 ppb             | 2,577 cps         | 4.2 %         |
| 165Ho (KED) | 0.008 ppb             | 1,605 cps         | 1.9 %         |
| 166Er (KED) | 0.023 ppb             | 1,689 cps         | 2.1 %         |
| 169Tm (KED) | 0.003 ppb             | 787 cps           | 11.8 %        |
| 174Yb (KED) | 0.019 ppb             | 1,606 cps         | 3.9 %         |
| 175Lu (KED) | 0.003 ppb             | 357 cps           | 4.3 %         |
| 205Tl (KED) | 0.012 ppb             | 2,037 cps         | 8.4 %         |
| 208Pb (KED) | 1.132 ppb             | 139,421 cps       | 1.0 %         |
| 232Th (KED) | 0.111 ppb             | 26,397 cps        | 3.3 %         |
| 238U (KED)  | 0.022 ppb             | 6,085 cps         | 4.6 %         |

## Sample Summary

Instrument ID: iCAP Q

Analysis index: 9

Analysis name: 17010jian

Analysis started at: 8/27/2021 4:53:55 PM

User name: WINDOWS-UPCI4ER\Administrator

| Category    | Concentration average | Concentration RSD |
|-------------|-----------------------|-------------------|
| 9Be (KED)   | 0.000 ppb             |                   |
| 11B (KED)   | 4.607 ppb             | 10.1 %            |
| 24Mg (KED)  | 516.018 ppb           | 1.5 %             |
| 27Al (KED)  | 423.653 ppb           | 1.5 %             |
| 51V (KED)   | 0.833 ppb             | 3.3 %             |
| 52Cr (KED)  | 1.693 ppb             | 4.2 %             |
| 55Mn (KED)  | 14.364 ppb            | 0.9 %             |
| 56Fe (KED)  | 360.184 ppb           | 0.6 %             |
| 58Ni (KED)  | 2.093 ppb             | 2.5 %             |
| 59Co (KED)  | 0.193 ppb             | 1.1 %             |
| 63Cu (KED)  | 8.052 ppb             | 2.1 %             |
| 64Zn (KED)  | 167.024 ppb           | 0.9 %             |
| 69Ga (KED)  | 2.441 ppb             | 2.0 %             |
| 75As (KED)  | 0.621 ppb             | 4.9 %             |
| 80Se (KED)  | 3.728 ppb             | 1.5 %             |
| 85Rb (KED)  | 2.933 ppb             | 1.0 %             |
| 88Sr (KED)  | 6.218 ppb             | 2.1 %             |
| 107Ag (KED) | 0.132 ppb             | 4.9 %             |
| 114Cd (KED) | 0.476 ppb             | 3.4 %             |
| 133Cs (KED) | 0.065 ppb             | 9.9 %             |
| 138Ba (KED) | 7.516 ppb             | 3.2 %             |
| 139La (KED) | 0.354 ppb             | 3.5 %             |
| 140Ce (KED) | 0.696 ppb             | 1.6 %             |
| 141Pr (KED) | 0.080 ppb             | 4.1 %             |
| 142Nd (KED) | 0.424 ppb             | 2.9 %             |
| 152Sm (KED) | 0.058 ppb             | 6.9 %             |
| 153Eu (KED) | 0.013 ppb             | 4.7 %             |
| 158Gd (KED) | 0.053 ppb             | 2.8 %             |
| 164Dy (KED) | 0.038 ppb             | 2.4 %             |
| 165Ho (KED) | 0.008 ppb             | 3.1 %             |
| 166Er (KED) | 0.022 ppb             | 1.2 %             |
| 169Tm (KED) | 0.003 ppb             | 3.3 %             |
| 174Yb (KED) | 0.017 ppb             | 3.7 %             |
| 175Lu (KED) | 0.002 ppb             | 2.3 %             |
| 205Tl (KED) | 0.007 ppb             | 8.9 %             |
| 208Pb (KED) | 0.727 ppb             | 3.0 %             |
| 232Th (KED) | 0.104 ppb             | 9.2 %             |
| 238U (KED)  | 0.022 ppb             | 7.3 %             |

| Category   | Concentration average | Intensity average | Intensity RSD |
|------------|-----------------------|-------------------|---------------|
| 9Be (KED)  | 0.000 ppb             | 0 cps             |               |
| 11B (KED)  | 4.607 ppb             | 336 cps           | 9.0 %         |
| 24Mg (KED) | 516.018 ppb           | 241,249 cps       | 1.5 %         |
| 27Al (KED) | 423.653 ppb           | 48,886 cps        | 1.5 %         |
| 51V (KED)  | 0.833 ppb             | 6,220 cps         | 3.3 %         |
| 52Cr (KED) | 1.693 ppb             | 19,808 cps        | 4.2 %         |
| 55Mn (KED) | 14.364 ppb            | 78,219 cps        | 0.9 %         |
| 56Fe (KED) | 360.184 ppb           | 3,773,484 cps     | 0.6 %         |
| 58Ni (KED) | 2.093 ppb             | 31,156 cps        | 2.3 %         |
| 59Co (KED) | 0.193 ppb             | 4,402 cps         | 1.1 %         |

| Category    | Concentration average | Intensity average | Intensity RSD |
|-------------|-----------------------|-------------------|---------------|
| 63Cu (KED)  | 8.052 ppb             | 142,727 cps       | 2.1 %         |
| 64Zn (KED)  | 167.024 ppb           | 715,311 cps       | 0.9 %         |
| 69Ga (KED)  | 2.441 ppb             | 13,160 cps        | 2.0 %         |
| 75As (KED)  | 0.621 ppb             | 838 cps           | 4.5 %         |
| 80Se (KED)  | 3.728 ppb             | 2,171 cps         | 0.9 %         |
| 85Rb (KED)  | 2.933 ppb             | 14,005 cps        | 1.0 %         |
| 88Sr (KED)  | 6.218 ppb             | 40,472 cps        | 2.1 %         |
| 107Ag (KED) | 0.132 ppb             | 6,110 cps         | 4.9 %         |
| 114Cd (KED) | 0.476 ppb             | 8,190 cps         | 3.4 %         |
| 133Cs (KED) | 0.065 ppb             | 1,690 cps         | 9.4 %         |
| 138Ba (KED) | 7.516 ppb             | 268,068 cps       | 3.1 %         |
| 139La (KED) | 0.354 ppb             | 25,136 cps        | 3.5 %         |
| 140Ce (KED) | 0.696 ppb             | 66,905 cps        | 1.6 %         |
| 141Pr (KED) | 0.080 ppb             | 7,725 cps         | 4.1 %         |
| 142Nd (KED) | 0.424 ppb             | 17,848 cps        | 2.9 %         |
| 152Sm (KED) | 0.058 ppb             | 2,307 cps         | 6.9 %         |
| 153Eu (KED) | 0.013 ppb             | 950 cps           | 4.6 %         |
| 158Gd (KED) | 0.053 ppb             | 2,826 cps         | 2.8 %         |
| 164Dy (KED) | 0.038 ppb             | 2,202 cps         | 2.4 %         |
| 165Ho (KED) | 0.008 ppb             | 1,521 cps         | 3.1 %         |
| 166Er (KED) | 0.022 ppb             | 1,611 cps         | 1.2 %         |
| 169Tm (KED) | 0.003 ppb             | 601 cps           | 3.2 %         |
| 174Yb (KED) | 0.017 ppb             | 1,427 cps         | 3.7 %         |
| 175Lu (KED) | 0.002 ppb             | 304 cps           | 2.3 %         |
| 205Tl (KED) | 0.007 ppb             | 1,235 cps         | 8.8 %         |
| 208Pb (KED) | 0.727 ppb             | 90,059 cps        | 3.0 %         |
| 232Th (KED) | 0.104 ppb             | 24,809 cps        | 9.0 %         |
| 238U (KED)  | 0.022 ppb             | 5,889 cps         | 7.3 %         |

## Sample Summary

Instrument ID: iCAP Q

Analysis index: 10

Analysis name: 1802039jian

Analysis started at: 8/27/2021 4:56:58 PM

User name: WINDOWS-UPCI4ER\Administrator

| Category    | Concentration average | Concentration RSD |
|-------------|-----------------------|-------------------|
| 9Be (KED)   | 0.009 ppb             | 173.2 %           |
| 11B (KED)   | 12.456 ppb            | 105.7 %           |
| 24Mg (KED)  | 545.823 ppb           | 1.1 %             |
| 27Al (KED)  | 610.095 ppb           | 2.0 %             |
| 51V (KED)   | 1.087 ppb             | 2.1 %             |
| 52Cr (KED)  | 1.254 ppb             | 4.3 %             |
| 55Mn (KED)  | 16.843 ppb            | 2.2 %             |
| 56Fe (KED)  | 511.388 ppb           | 1.3 %             |
| 58Ni (KED)  | 2.530 ppb             | 1.8 %             |
| 59Co (KED)  | 1.021 ppb             | 100.1 %           |
| 63Cu (KED)  | 13.553 ppb            | 0.4 %             |
| 64Zn (KED)  | 168.001 ppb           | 1.7 %             |
| 69Ga (KED)  | 3.752 ppb             | 0.7 %             |
| 75As (KED)  | 0.600 ppb             | 4.4 %             |
| 80Se (KED)  | 4.455 ppb             | 6.3 %             |
| 85Rb (KED)  | 3.207 ppb             | 2.2 %             |
| 88Sr (KED)  | 5.915 ppb             | 3.1 %             |
| 107Ag (KED) | 0.095 ppb             | 2.2 %             |
| 114Cd (KED) | 0.666 ppb             | 1.4 %             |
| 133Cs (KED) | 0.103 ppb             | 7.8 %             |
| 138Ba (KED) | 11.491 ppb            | 4.0 %             |
| 139La (KED) | 0.515 ppb             | 4.7 %             |
| 140Ce (KED) | 1.068 ppb             | 0.7 %             |
| 141Pr (KED) | 0.127 ppb             | 2.7 %             |
| 142Nd (KED) | 0.657 ppb             | 3.2 %             |
| 152Sm (KED) | 0.090 ppb             | 2.2 %             |
| 153Eu (KED) | 0.021 ppb             | 6.4 %             |
| 158Gd (KED) | 0.083 ppb             | 2.8 %             |
| 164Dy (KED) | 0.062 ppb             | 13.5 %            |
| 165Ho (KED) | 0.011 ppb             | 5.4 %             |
| 166Er (KED) | 0.032 ppb             | 1.6 %             |
| 169Tm (KED) | 0.004 ppb             | 0.2 %             |
| 174Yb (KED) | 0.025 ppb             | 2.0 %             |
| 175Lu (KED) | 0.004 ppb             | 9.9 %             |
| 205Tl (KED) | 0.014 ppb             | 0.7 %             |
| 208Pb (KED) | 1.285 ppb             | 1.0 %             |
| 232Th (KED) | 0.137 ppb             | 2.4 %             |
| 238U (KED)  | 0.030 ppb             | 6.7 %             |

| Category   | Concentration average | Intensity average | Intensity RSD |
|------------|-----------------------|-------------------|---------------|
| 9Be (KED)  | 0.009 ppb             | 1 cps             | 173.2 %       |
| 11B (KED)  | 12.456 ppb            | 845 cps           | 101.1 %       |
| 24Mg (KED) | 545.823 ppb           | 255,173 cps       | 1.1 %         |
| 27Al (KED) | 610.095 ppb           | 70,360 cps        | 2.0 %         |
| 51V (KED)  | 1.087 ppb             | 8,113 cps         | 2.1 %         |
| 52Cr (KED) | 1.254 ppb             | 14,711 cps        | 4.3 %         |
| 55Mn (KED) | 16.843 ppb            | 91,677 cps        | 2.2 %         |
| 56Fe (KED) | 511.388 ppb           | 5,355,237 cps     | 1.3 %         |
| 58Ni (KED) | 2.530 ppb             | 37,281 cps        | 1.7 %         |
| 59Co (KED) | 1.021 ppb             | 23,258 cps        | 100.0 %       |

| Category    | Concentration average | Intensity average | Intensity RSD |
|-------------|-----------------------|-------------------|---------------|
| 63Cu (KED)  | 13.553 ppb            | 239,665 cps       | 0.4 %         |
| 64Zn (KED)  | 168.001 ppb           | 719,491 cps       | 1.7 %         |
| 69Ga (KED)  | 3.752 ppb             | 20,144 cps        | 0.7 %         |
| 75As (KED)  | 0.600 ppb             | 812 cps           | 4.0 %         |
| 80Se (KED)  | 4.455 ppb             | 2,432 cps         | 4.2 %         |
| 85Rb (KED)  | 3.207 ppb             | 15,308 cps        | 2.2 %         |
| 88Sr (KED)  | 5.915 ppb             | 38,499 cps        | 3.1 %         |
| 107Ag (KED) | 0.095 ppb             | 4,429 cps         | 2.1 %         |
| 114Cd (KED) | 0.666 ppb             | 11,461 cps        | 1.4 %         |
| 133Cs (KED) | 0.103 ppb             | 2,604 cps         | 7.5 %         |
| 138Ba (KED) | 11.491 ppb            | 408,115 cps       | 4.0 %         |
| 139La (KED) | 0.515 ppb             | 36,616 cps        | 4.7 %         |
| 140Ce (KED) | 1.068 ppb             | 102,669 cps       | 0.7 %         |
| 141Pr (KED) | 0.127 ppb             | 12,271 cps        | 2.7 %         |
| 142Nd (KED) | 0.657 ppb             | 27,629 cps        | 3.2 %         |
| 152Sm (KED) | 0.090 ppb             | 3,546 cps         | 2.2 %         |
| 153Eu (KED) | 0.021 ppb             | 1,499 cps         | 6.4 %         |
| 158Gd (KED) | 0.083 ppb             | 4,477 cps         | 2.8 %         |
| 164Dy (KED) | 0.062 ppb             | 3,593 cps         | 13.5 %        |
| 165Ho (KED) | 0.011 ppb             | 2,198 cps         | 5.4 %         |
| 166Er (KED) | 0.032 ppb             | 2,288 cps         | 1.6 %         |
| 169Tm (KED) | 0.004 ppb             | 909 cps           | 0.2 %         |
| 174Yb (KED) | 0.025 ppb             | 2,151 cps         | 2.0 %         |
| 175Lu (KED) | 0.004 ppb             | 481 cps           | 9.9 %         |
| 205Tl (KED) | 0.014 ppb             | 2,359 cps         | 0.7 %         |
| 208Pb (KED) | 1.285 ppb             | 158,061 cps       | 1.0 %         |
| 232Th (KED) | 0.137 ppb             | 32,492 cps        | 2.3 %         |
| 238U (KED)  | 0.030 ppb             | 8,223 cps         | 6.7 %         |

## Sample Summary

Instrument ID: iCAP Q

Analysis index: 11

Analysis name: 1705003jian

Analysis started at: 8/27/2021 4:59:58 PM

User name: WINDOWS-UPCI4ER\Administrator

| Category    | Concentration average | Concentration RSD |
|-------------|-----------------------|-------------------|
| 9Be (KED)   | 0.019 ppb             | 173.2 %           |
| 11B (KED)   | 4.419 ppb             | 6.0 %             |
| 24Mg (KED)  | 646.912 ppb           | 1.8 %             |
| 27Al (KED)  | 530.411 ppb           | 2.2 %             |
| 51V (KED)   | 0.936 ppb             | 2.2 %             |
| 52Cr (KED)  | 2.066 ppb             | 47.7 %            |
| 55Mn (KED)  | 15.243 ppb            | 1.3 %             |
| 56Fe (KED)  | 513.505 ppb           | 2.0 %             |
| 58Ni (KED)  | 2.454 ppb             | 1.3 %             |
| 59Co (KED)  | 0.503 ppb             | 78.7 %            |
| 63Cu (KED)  | 14.896 ppb            | 2.2 %             |
| 64Zn (KED)  | 163.569 ppb           | 2.3 %             |
| 69Ga (KED)  | 2.404 ppb             | 1.8 %             |
| 75As (KED)  | 0.456 ppb             | 10.6 %            |
| 80Se (KED)  | 4.371 ppb             | 2.5 %             |
| 85Rb (KED)  | 5.163 ppb             | 4.2 %             |
| 88Sr (KED)  | 6.055 ppb             | 2.5 %             |
| 107Ag (KED) | 0.085 ppb             | 3.6 %             |
| 114Cd (KED) | 0.541 ppb             | 4.5 %             |
| 133Cs (KED) | 0.085 ppb             | 1.0 %             |
| 138Ba (KED) | 6.712 ppb             | 5.8 %             |
| 139La (KED) | 0.457 ppb             | 5.5 %             |
| 140Ce (KED) | 0.909 ppb             | 3.0 %             |
| 141Pr (KED) | 0.105 ppb             | 6.0 %             |
| 142Nd (KED) | 0.530 ppb             | 4.0 %             |
| 152Sm (KED) | 0.069 ppb             | 9.3 %             |
| 153Eu (KED) | 0.015 ppb             | 9.0 %             |
| 158Gd (KED) | 0.066 ppb             | 3.1 %             |
| 164Dy (KED) | 0.046 ppb             | 2.4 %             |
| 165Ho (KED) | 0.009 ppb             | 9.5 %             |
| 166Er (KED) | 0.024 ppb             | 4.2 %             |
| 169Tm (KED) | 0.003 ppb             | 7.5 %             |
| 174Yb (KED) | 0.019 ppb             | 4.5 %             |
| 175Lu (KED) | 0.003 ppb             | 6.0 %             |
| 205Tl (KED) | 0.009 ppb             | 2.2 %             |
| 208Pb (KED) | 1.724 ppb             | 4.8 %             |
| 232Th (KED) | 0.106 ppb             | 5.4 %             |
| 238U (KED)  | 0.023 ppb             | 21.6 %            |

| Category   | Concentration average | Intensity average | Intensity RSD |
|------------|-----------------------|-------------------|---------------|
| 9Be (KED)  | 0.019 ppb             | 2 cps             | 173.2 %       |
| 11B (KED)  | 4.419 ppb             | 323 cps           | 5.4 %         |
| 24Mg (KED) | 646.912 ppb           | 302,397 cps       | 1.8 %         |
| 27Al (KED) | 530.411 ppb           | 61,182 cps        | 2.2 %         |
| 51V (KED)  | 0.936 ppb             | 6,985 cps         | 2.2 %         |
| 52Cr (KED) | 2.066 ppb             | 24,138 cps        | 47.4 %        |
| 55Mn (KED) | 15.243 ppb            | 82,993 cps        | 1.3 %         |
| 56Fe (KED) | 513.505 ppb           | 5,377,387 cps     | 2.0 %         |
| 58Ni (KED) | 2.454 ppb             | 36,227 cps        | 1.2 %         |
| 59Co (KED) | 0.503 ppb             | 11,467 cps        | 78.7 %        |

| Category    | Concentration average | Intensity average | Intensity RSD |
|-------------|-----------------------|-------------------|---------------|
| 63Cu (KED)  | 14.896 ppb            | 263,332 cps       | 2.2 %         |
| 64Zn (KED)  | 163.569 ppb           | 700,530 cps       | 2.3 %         |
| 69Ga (KED)  | 2.404 ppb             | 12,961 cps        | 1.8 %         |
| 75As (KED)  | 0.456 ppb             | 632 cps           | 9.6 %         |
| 80Se (KED)  | 4.371 ppb             | 2,402 cps         | 1.6 %         |
| 85Rb (KED)  | 5.163 ppb             | 24,614 cps        | 4.2 %         |
| 88Sr (KED)  | 6.055 ppb             | 39,412 cps        | 2.5 %         |
| 107Ag (KED) | 0.085 ppb             | 3,973 cps         | 3.5 %         |
| 114Cd (KED) | 0.541 ppb             | 9,318 cps         | 4.5 %         |
| 133Cs (KED) | 0.085 ppb             | 2,171 cps         | 1.0 %         |
| 138Ba (KED) | 6.712 ppb             | 239,734 cps       | 5.8 %         |
| 139La (KED) | 0.457 ppb             | 32,440 cps        | 5.5 %         |
| 140Ce (KED) | 0.909 ppb             | 87,422 cps        | 3.0 %         |
| 141Pr (KED) | 0.105 ppb             | 10,205 cps        | 6.0 %         |
| 142Nd (KED) | 0.530 ppb             | 22,284 cps        | 4.0 %         |
| 152Sm (KED) | 0.069 ppb             | 2,736 cps         | 9.3 %         |
| 153Eu (KED) | 0.015 ppb             | 1,129 cps         | 9.0 %         |
| 158Gd (KED) | 0.066 ppb             | 3,554 cps         | 3.1 %         |
| 164Dy (KED) | 0.046 ppb             | 2,687 cps         | 2.4 %         |
| 165Ho (KED) | 0.009 ppb             | 1,751 cps         | 9.5 %         |
| 166Er (KED) | 0.024 ppb             | 1,700 cps         | 4.1 %         |
| 169Tm (KED) | 0.003 ppb             | 668 cps           | 7.5 %         |
| 174Yb (KED) | 0.019 ppb             | 1,638 cps         | 4.5 %         |
| 175Lu (KED) | 0.003 ppb             | 337 cps           | 6.0 %         |
| 205Tl (KED) | 0.009 ppb             | 1,659 cps         | 2.1 %         |
| 208Pb (KED) | 1.724 ppb             | 211,596 cps       | 4.8 %         |
| 232Th (KED) | 0.106 ppb             | 25,187 cps        | 5.3 %         |
| 238U (KED)  | 0.023 ppb             | 6,377 cps         | 21.6 %        |

## Sample Summary

Instrument ID: iCAP Q

Analysis index: 12

Analysis name: 1802110jian

Analysis started at: 8/27/2021 5:03:01 PM

User name: WINDOWS-UPCI4ER\Administrator

| Category    | Concentration average | Concentration RSD |
|-------------|-----------------------|-------------------|
| 9Be (KED)   | 0.009 ppb             | 173.2 %           |
| 11B (KED)   | 3.066 ppb             | 4.8 %             |
| 24Mg (KED)  | 400.585 ppb           | 2.1 %             |
| 27Al (KED)  | 417.726 ppb           | 3.2 %             |
| 51V (KED)   | 0.810 ppb             | 5.0 %             |
| 52Cr (KED)  | 4.872 ppb             | 0.4 %             |
| 55Mn (KED)  | 14.195 ppb            | 2.0 %             |
| 56Fe (KED)  | 368.995 ppb           | 2.7 %             |
| 58Ni (KED)  | 2.769 ppb             | 1.4 %             |
| 59Co (KED)  | 0.200 ppb             | 0.7 %             |
| 63Cu (KED)  | 15.455 ppb            | 1.4 %             |
| 64Zn (KED)  | 181.099 ppb           | 0.9 %             |
| 69Ga (KED)  | 2.277 ppb             | 0.6 %             |
| 75As (KED)  | 0.589 ppb             | 49.7 %            |
| 80Se (KED)  | 2.603 ppb             | 3.9 %             |
| 85Rb (KED)  | 1.726 ppb             | 2.0 %             |
| 88Sr (KED)  | 5.474 ppb             | 2.5 %             |
| 107Ag (KED) | 0.167 ppb             | 1.7 %             |
| 114Cd (KED) | 0.381 ppb             | 0.6 %             |
| 133Cs (KED) | 0.060 ppb             | 4.5 %             |
| 138Ba (KED) | 6.838 ppb             | 1.4 %             |
| 139La (KED) | 0.364 ppb             | 2.2 %             |
| 140Ce (KED) | 0.763 ppb             | 2.3 %             |
| 141Pr (KED) | 0.085 ppb             | 0.4 %             |
| 142Nd (KED) | 0.449 ppb             | 1.1 %             |
| 152Sm (KED) | 0.058 ppb             | 6.2 %             |
| 153Eu (KED) | 0.013 ppb             | 3.3 %             |
| 158Gd (KED) | 0.055 ppb             | 1.4 %             |
| 164Dy (KED) | 0.039 ppb             | 3.0 %             |
| 165Ho (KED) | 0.008 ppb             | 4.0 %             |
| 166Er (KED) | 0.023 ppb             | 1.4 %             |
| 169Tm (KED) | 0.003 ppb             | 4.3 %             |
| 174Yb (KED) | 0.017 ppb             | 3.5 %             |
| 175Lu (KED) | 0.003 ppb             | 16.2 %            |
| 205Tl (KED) | 0.007 ppb             | 6.8 %             |
| 208Pb (KED) | 1.212 ppb             | 1.8 %             |
| 232Th (KED) | 0.097 ppb             | 7.4 %             |
| 238U (KED)  | 0.025 ppb             | 4.8 %             |

| Category   | Concentration average | Intensity average | Intensity RSD |
|------------|-----------------------|-------------------|---------------|
| 9Be (KED)  | 0.009 ppb             | 1 cps             | 173.2 %       |
| 11B (KED)  | 3.066 ppb             | 236 cps           | 4.1 %         |
| 24Mg (KED) | 400.585 ppb           | 187,323 cps       | 2.1 %         |
| 27Al (KED) | 417.726 ppb           | 48,203 cps        | 3.2 %         |
| 51V (KED)  | 0.810 ppb             | 6,046 cps         | 5.0 %         |
| 52Cr (KED) | 4.872 ppb             | 56,720 cps        | 0.4 %         |
| 55Mn (KED) | 14.195 ppb            | 77,301 cps        | 2.0 %         |
| 56Fe (KED) | 368.995 ppb           | 3,865,658 cps     | 2.7 %         |
| 58Ni (KED) | 2.769 ppb             | 40,638 cps        | 1.3 %         |
| 59Co (KED) | 0.200 ppb             | 4,566 cps         | 0.7 %         |

| Category    | Concentration average | Intensity average | Intensity RSD |
|-------------|-----------------------|-------------------|---------------|
| 63Cu (KED)  | 15.455 ppb            | 273,184 cps       | 1.4 %         |
| 64Zn (KED)  | 181.099 ppb           | 775,521 cps       | 0.9 %         |
| 69Ga (KED)  | 2.277 ppb             | 12,286 cps        | 0.6 %         |
| 75As (KED)  | 0.589 ppb             | 798 cps           | 45.8 %        |
| 80Se (KED)  | 2.603 ppb             | 1,767 cps         | 2.0 %         |
| 85Rb (KED)  | 1.726 ppb             | 8,257 cps         | 2.0 %         |
| 88Sr (KED)  | 5.474 ppb             | 35,635 cps        | 2.5 %         |
| 107Ag (KED) | 0.167 ppb             | 7,706 cps         | 1.6 %         |
| 114Cd (KED) | 0.381 ppb             | 6,573 cps         | 0.6 %         |
| 133Cs (KED) | 0.060 ppb             | 1,567 cps         | 4.3 %         |
| 138Ba (KED) | 6.838 ppb             | 244,156 cps       | 1.4 %         |
| 139La (KED) | 0.364 ppb             | 25,846 cps        | 2.2 %         |
| 140Ce (KED) | 0.763 ppb             | 73,350 cps        | 2.3 %         |
| 141Pr (KED) | 0.085 ppb             | 8,262 cps         | 0.4 %         |
| 142Nd (KED) | 0.449 ppb             | 18,897 cps        | 1.1 %         |
| 152Sm (KED) | 0.058 ppb             | 2,314 cps         | 6.2 %         |
| 153Eu (KED) | 0.013 ppb             | 934 cps           | 3.3 %         |
| 158Gd (KED) | 0.055 ppb             | 2,936 cps         | 1.4 %         |
| 164Dy (KED) | 0.039 ppb             | 2,230 cps         | 3.0 %         |
| 165Ho (KED) | 0.008 ppb             | 1,515 cps         | 4.0 %         |
| 166Er (KED) | 0.023 ppb             | 1,687 cps         | 1.4 %         |
| 169Tm (KED) | 0.003 ppb             | 604 cps           | 4.3 %         |
| 174Yb (KED) | 0.017 ppb             | 1,409 cps         | 3.4 %         |
| 175Lu (KED) | 0.003 ppb             | 314 cps           | 16.2 %        |
| 205Tl (KED) | 0.007 ppb             | 1,300 cps         | 6.7 %         |
| 208Pb (KED) | 1.212 ppb             | 149,213 cps       | 1.8 %         |
| 232Th (KED) | 0.097 ppb             | 23,198 cps        | 7.2 %         |
| 238U (KED)  | 0.025 ppb             | 6,728 cps         | 4.7 %         |

## Sample Summary

Instrument ID: iCAP Q

Analysis index: 13

Analysis name: 1702069jian

Analysis started at: 8/27/2021 5:06:12 PM

User name: WINDOWS-UPCI4ER\Administrator

| Category    | Concentration average | Concentration RSD |
|-------------|-----------------------|-------------------|
| 9Be (KED)   | 0.000 ppb             |                   |
| 11B (KED)   | 2.621 ppb             | 21.2 %            |
| 24Mg (KED)  | 514.637 ppb           | 2.0 %             |
| 27Al (KED)  | 416.089 ppb           | 2.0 %             |
| 51V (KED)   | 0.744 ppb             | 1.4 %             |
| 52Cr (KED)  | 2.552 ppb             | 8.3 %             |
| 55Mn (KED)  | 12.338 ppb            | 1.3 %             |
| 56Fe (KED)  | 366.464 ppb           | 1.4 %             |
| 58Ni (KED)  | 2.052 ppb             | 2.5 %             |
| 59Co (KED)  | 0.185 ppb             | 1.0 %             |
| 63Cu (KED)  | 11.813 ppb            | 1.5 %             |
| 64Zn (KED)  | 164.820 ppb           | 2.6 %             |
| 69Ga (KED)  | 2.133 ppb             | 2.4 %             |
| 75As (KED)  | 0.665 ppb             | 4.0 %             |
| 80Se (KED)  | 3.196 ppb             | 4.7 %             |
| 85Rb (KED)  | 3.103 ppb             | 1.0 %             |
| 88Sr (KED)  | 5.218 ppb             | 0.7 %             |
| 107Ag (KED) | 0.073 ppb             | 5.8 %             |
| 114Cd (KED) | 0.459 ppb             | 3.1 %             |
| 133Cs (KED) | 0.064 ppb             | 1.0 %             |
| 138Ba (KED) | 6.771 ppb             | 2.2 %             |
| 139La (KED) | 0.332 ppb             | 3.1 %             |
| 140Ce (KED) | 0.690 ppb             | 5.1 %             |
| 141Pr (KED) | 0.080 ppb             | 0.9 %             |
| 142Nd (KED) | 0.414 ppb             | 2.1 %             |
| 152Sm (KED) | 0.055 ppb             | 3.0 %             |
| 153Eu (KED) | 0.012 ppb             | 2.3 %             |
| 158Gd (KED) | 0.051 ppb             | 2.3 %             |
| 164Dy (KED) | 0.039 ppb             | 1.9 %             |
| 165Ho (KED) | 0.008 ppb             | 3.3 %             |
| 166Er (KED) | 0.022 ppb             | 7.3 %             |
| 169Tm (KED) | 0.003 ppb             | 12.6 %            |
| 174Yb (KED) | 0.017 ppb             | 1.6 %             |
| 175Lu (KED) | 0.003 ppb             | 9.5 %             |
| 205Tl (KED) | 0.009 ppb             | 6.1 %             |
| 208Pb (KED) | 1.204 ppb             | 2.3 %             |
| 232Th (KED) | 0.096 ppb             | 2.0 %             |
| 238U (KED)  | 0.022 ppb             | 5.3 %             |

| Category   | Concentration average | Intensity average | Intensity RSD |
|------------|-----------------------|-------------------|---------------|
| 9Be (KED)  | 0.000 ppb             | 0 cps             |               |
| 11B (KED)  | 2.621 ppb             | 207 cps           | 17.4 %        |
| 24Mg (KED) | 514.637 ppb           | 240,603 cps       | 2.0 %         |
| 27Al (KED) | 416.089 ppb           | 48,015 cps        | 2.0 %         |
| 51V (KED)  | 0.744 ppb             | 5,556 cps         | 1.4 %         |
| 52Cr (KED) | 2.552 ppb             | 29,779 cps        | 8.2 %         |
| 55Mn (KED) | 12.338 ppb            | 67,220 cps        | 1.3 %         |
| 56Fe (KED) | 366.464 ppb           | 3,839,183 cps     | 1.4 %         |
| 58Ni (KED) | 2.052 ppb             | 30,573 cps        | 2.4 %         |
| 59Co (KED) | 0.185 ppb             | 4,212 cps         | 1.0 %         |

| Category    | Concentration average | Intensity average | Intensity RSD |
|-------------|-----------------------|-------------------|---------------|
| 63Cu (KED)  | 11.813 ppb            | 209,003 cps       | 1.5 %         |
| 64Zn (KED)  | 164.820 ppb           | 705,884 cps       | 2.6 %         |
| 69Ga (KED)  | 2.133 ppb             | 11,521 cps        | 2.4 %         |
| 75As (KED)  | 0.665 ppb             | 893 cps           | 3.7 %         |
| 80Se (KED)  | 3.196 ppb             | 1,980 cps         | 2.8 %         |
| 85Rb (KED)  | 3.103 ppb             | 14,812 cps        | 1.0 %         |
| 88Sr (KED)  | 5.218 ppb             | 33,977 cps        | 0.7 %         |
| 107Ag (KED) | 0.073 ppb             | 3,404 cps         | 5.6 %         |
| 114Cd (KED) | 0.459 ppb             | 7,901 cps         | 3.1 %         |
| 133Cs (KED) | 0.064 ppb             | 1,650 cps         | 0.9 %         |
| 138Ba (KED) | 6.771 ppb             | 241,810 cps       | 2.2 %         |
| 139La (KED) | 0.332 ppb             | 23,568 cps        | 3.1 %         |
| 140Ce (KED) | 0.690 ppb             | 66,342 cps        | 5.1 %         |
| 141Pr (KED) | 0.080 ppb             | 7,761 cps         | 0.9 %         |
| 142Nd (KED) | 0.414 ppb             | 17,414 cps        | 2.1 %         |
| 152Sm (KED) | 0.055 ppb             | 2,190 cps         | 3.0 %         |
| 153Eu (KED) | 0.012 ppb             | 880 cps           | 2.3 %         |
| 158Gd (KED) | 0.051 ppb             | 2,739 cps         | 2.3 %         |
| 164Dy (KED) | 0.039 ppb             | 2,239 cps         | 1.9 %         |
| 165Ho (KED) | 0.008 ppb             | 1,549 cps         | 3.3 %         |
| 166Er (KED) | 0.022 ppb             | 1,575 cps         | 7.1 %         |
| 169Tm (KED) | 0.003 ppb             | 663 cps           | 12.5 %        |
| 174Yb (KED) | 0.017 ppb             | 1,472 cps         | 1.6 %         |
| 175Lu (KED) | 0.003 ppb             | 332 cps           | 9.5 %         |
| 205Tl (KED) | 0.009 ppb             | 1,531 cps         | 6.1 %         |
| 208Pb (KED) | 1.204 ppb             | 148,172 cps       | 2.3 %         |
| 232Th (KED) | 0.096 ppb             | 22,978 cps        | 1.9 %         |
| 238U (KED)  | 0.022 ppb             | 6,144 cps         | 5.3 %         |

## Sample Summary

Instrument ID: iCAP Q

Analysis index: 14

Analysis name: 17012jian

Analysis started at: 8/27/2021 5:09:30 PM

User name: WINDOWS-UPCI4ER\Administrator

| Category    | Concentration average | Concentration RSD |
|-------------|-----------------------|-------------------|
| 9Be (KED)   | 0.019 ppb             | 86.6 %            |
| 11B (KED)   | 3.100 ppb             | 14.9 %            |
| 24Mg (KED)  | 670.367 ppb           | 0.3 %             |
| 27Al (KED)  | 523.326 ppb           | 2.2 %             |
| 51V (KED)   | 0.999 ppb             | 2.1 %             |
| 52Cr (KED)  | 2.791 ppb             | 1.7 %             |
| 55Mn (KED)  | 19.161 ppb            | 0.9 %             |
| 56Fe (KED)  | 389.574 ppb           | 1.7 %             |
| 58Ni (KED)  | 2.165 ppb             | 1.2 %             |
| 59Co (KED)  | 0.241 ppb             | 7.1 %             |
| 63Cu (KED)  | 10.752 ppb            | 1.5 %             |
| 64Zn (KED)  | 172.722 ppb           | 1.0 %             |
| 69Ga (KED)  | 3.002 ppb             | 1.6 %             |
| 75As (KED)  | 0.606 ppb             | 6.4 %             |
| 80Se (KED)  | 2.461 ppb             | 6.1 %             |
| 85Rb (KED)  | 2.753 ppb             | 3.3 %             |
| 88Sr (KED)  | 8.117 ppb             | 1.1 %             |
| 107Ag (KED) | 0.085 ppb             | 3.2 %             |
| 114Cd (KED) | 0.375 ppb             | 0.2 %             |
| 133Cs (KED) | 0.084 ppb             | 5.9 %             |
| 138Ba (KED) | 9.061 ppb             | 2.6 %             |
| 139La (KED) | 0.375 ppb             | 3.6 %             |
| 140Ce (KED) | 0.757 ppb             | 6.5 %             |
| 141Pr (KED) | 0.092 ppb             | 3.2 %             |
| 142Nd (KED) | 0.460 ppb             | 2.6 %             |
| 152Sm (KED) | 0.066 ppb             | 4.0 %             |
| 153Eu (KED) | 0.016 ppb             | 3.4 %             |
| 158Gd (KED) | 0.063 ppb             | 3.3 %             |
| 164Dy (KED) | 0.047 ppb             | 2.9 %             |
| 165Ho (KED) | 0.011 ppb             | 29.0 %            |
| 166Er (KED) | 0.026 ppb             | 3.3 %             |
| 169Tm (KED) | 0.004 ppb             | 9.3 %             |
| 174Yb (KED) | 0.020 ppb             | 3.7 %             |
| 175Lu (KED) | 0.003 ppb             | 9.7 %             |
| 205Tl (KED) | 0.009 ppb             | 3.4 %             |
| 208Pb (KED) | 0.969 ppb             | 0.9 %             |
| 232Th (KED) | 0.107 ppb             | 2.5 %             |
| 238U (KED)  | 0.022 ppb             | 2.0 %             |

| Category   | Concentration average | Intensity average | Intensity RSD |
|------------|-----------------------|-------------------|---------------|
| 9Be (KED)  | 0.019 ppb             | 2 cps             | 86.6 %        |
| 11B (KED)  | 3.100 ppb             | 238 cps           | 12.6 %        |
| 24Mg (KED) | 670.367 ppb           | 313,354 cps       | 0.3 %         |
| 27Al (KED) | 523.326 ppb           | 60,366 cps        | 2.2 %         |
| 51V (KED)  | 0.999 ppb             | 7,454 cps         | 2.1 %         |
| 52Cr (KED) | 2.791 ppb             | 32,559 cps        | 1.7 %         |
| 55Mn (KED) | 19.161 ppb            | 104,261 cps       | 0.9 %         |
| 56Fe (KED) | 389.574 ppb           | 4,080,938 cps     | 1.7 %         |
| 58Ni (KED) | 2.165 ppb             | 32,168 cps        | 1.2 %         |
| 59Co (KED) | 0.241 ppb             | 5,488 cps         | 7.1 %         |

| Category    | Concentration average | Intensity average | Intensity RSD |
|-------------|-----------------------|-------------------|---------------|
| 63Cu (KED)  | 10.752 ppb            | 190,309 cps       | 1.5 %         |
| 64Zn (KED)  | 172.722 ppb           | 739,686 cps       | 1.0 %         |
| 69Ga (KED)  | 3.002 ppb             | 16,146 cps        | 1.6 %         |
| 75As (KED)  | 0.606 ppb             | 820 cps           | 5.9 %         |
| 80Se (KED)  | 2.461 ppb             | 1,716 cps         | 3.1 %         |
| 85Rb (KED)  | 2.753 ppb             | 13,148 cps        | 3.3 %         |
| 88Sr (KED)  | 8.117 ppb             | 52,803 cps        | 1.1 %         |
| 107Ag (KED) | 0.085 ppb             | 3,966 cps         | 3.1 %         |
| 114Cd (KED) | 0.375 ppb             | 6,464 cps         | 0.2 %         |
| 133Cs (KED) | 0.084 ppb             | 2,151 cps         | 5.7 %         |
| 138Ba (KED) | 9.061 ppb             | 322,507 cps       | 2.6 %         |
| 139La (KED) | 0.375 ppb             | 26,666 cps        | 3.6 %         |
| 140Ce (KED) | 0.757 ppb             | 72,762 cps        | 6.5 %         |
| 141Pr (KED) | 0.092 ppb             | 8,961 cps         | 3.2 %         |
| 142Nd (KED) | 0.460 ppb             | 19,366 cps        | 2.6 %         |
| 152Sm (KED) | 0.066 ppb             | 2,611 cps         | 4.0 %         |
| 153Eu (KED) | 0.016 ppb             | 1,183 cps         | 3.4 %         |
| 158Gd (KED) | 0.063 ppb             | 3,372 cps         | 3.3 %         |
| 164Dy (KED) | 0.047 ppb             | 2,714 cps         | 2.9 %         |
| 165Ho (KED) | 0.011 ppb             | 2,193 cps         | 29.0 %        |
| 166Er (KED) | 0.026 ppb             | 1,852 cps         | 3.2 %         |
| 169Tm (KED) | 0.004 ppb             | 844 cps           | 9.3 %         |
| 174Yb (KED) | 0.020 ppb             | 1,688 cps         | 3.7 %         |
| 175Lu (KED) | 0.003 ppb             | 387 cps           | 9.7 %         |
| 205Tl (KED) | 0.009 ppb             | 1,562 cps         | 3.4 %         |
| 208Pb (KED) | 0.969 ppb             | 119,551 cps       | 0.9 %         |
| 232Th (KED) | 0.107 ppb             | 25,534 cps        | 2.5 %         |
| 238U (KED)  | 0.022 ppb             | 6,017 cps         | 2.0 %         |

## Sample Summary

Instrument ID: iCAP Q

Analysis index: 15

Analysis name: 1801068jian

Analysis started at: 8/27/2021 5:12:44 PM

User name: WINDOWS-UPCI4ER\Administrator

| Category    | Concentration average | Concentration RSD |
|-------------|-----------------------|-------------------|
| 9Be (KED)   | 0.019 ppb             | 86.6 %            |
| 11B (KED)   | 5.173 ppb             | 7.0 %             |
| 24Mg (KED)  | 614.126 ppb           | 2.6 %             |
| 27Al (KED)  | 438.375 ppb           | 3.1 %             |
| 51V (KED)   | 0.931 ppb             | 1.3 %             |
| 52Cr (KED)  | 3.294 ppb             | 2.8 %             |
| 55Mn (KED)  | 20.946 ppb            | 2.4 %             |
| 56Fe (KED)  | 378.558 ppb           | 2.5 %             |
| 58Ni (KED)  | 2.282 ppb             | 0.7 %             |
| 59Co (KED)  | 0.261 ppb             | 3.9 %             |
| 63Cu (KED)  | 28.831 ppb            | 1.1 %             |
| 64Zn (KED)  | 163.173 ppb           | 1.3 %             |
| 69Ga (KED)  | 3.317 ppb             | 1.4 %             |
| 75As (KED)  | 0.425 ppb             | 7.2 %             |
| 80Se (KED)  | 2.999 ppb             | 4.4 %             |
| 85Rb (KED)  | 2.284 ppb             | 3.5 %             |
| 88Sr (KED)  | 8.828 ppb             | 1.7 %             |
| 107Ag (KED) | 0.147 ppb             | 0.5 %             |
| 114Cd (KED) | 0.466 ppb             | 1.9 %             |
| 133Cs (KED) | 0.073 ppb             | 3.4 %             |
| 138Ba (KED) | 10.826 ppb            | 1.3 %             |
| 139La (KED) | 0.510 ppb             | 0.2 %             |
| 140Ce (KED) | 0.964 ppb             | 1.7 %             |
| 141Pr (KED) | 0.119 ppb             | 0.2 %             |
| 142Nd (KED) | 0.589 ppb             | 0.7 %             |
| 152Sm (KED) | 0.084 ppb             | 3.2 %             |
| 153Eu (KED) | 0.017 ppb             | 3.8 %             |
| 158Gd (KED) | 0.076 ppb             | 2.7 %             |
| 164Dy (KED) | 0.055 ppb             | 2.8 %             |
| 165Ho (KED) | 0.010 ppb             | 8.1 %             |
| 166Er (KED) | 0.026 ppb             | 6.1 %             |
| 169Tm (KED) | 0.003 ppb             | 4.9 %             |
| 174Yb (KED) | 0.020 ppb             | 2.9 %             |
| 175Lu (KED) | 0.003 ppb             | 4.1 %             |
| 205Tl (KED) | 0.008 ppb             | 1.8 %             |
| 208Pb (KED) | 3.405 ppb             | 2.3 %             |
| 232Th (KED) | 0.095 ppb             | 1.8 %             |
| 238U (KED)  | 0.027 ppb             | 2.7 %             |

| Category   | Concentration average | Intensity average | Intensity RSD |
|------------|-----------------------|-------------------|---------------|
| 9Be (KED)  | 0.019 ppb             | 2 cps             | 86.6 %        |
| 11B (KED)  | 5.173 ppb             | 372 cps           | 6.3 %         |
| 24Mg (KED) | 614.126 ppb           | 287,081 cps       | 2.6 %         |
| 27Al (KED) | 438.375 ppb           | 50,581 cps        | 3.1 %         |
| 51V (KED)  | 0.931 ppb             | 6,945 cps         | 1.3 %         |
| 52Cr (KED) | 3.294 ppb             | 38,398 cps        | 2.8 %         |
| 55Mn (KED) | 20.946 ppb            | 113,952 cps       | 2.4 %         |
| 56Fe (KED) | 378.558 ppb           | 3,965,695 cps     | 2.5 %         |
| 58Ni (KED) | 2.282 ppb             | 33,807 cps        | 0.6 %         |
| 59Co (KED) | 0.261 ppb             | 5,950 cps         | 3.9 %         |

| Category    | Concentration average | Intensity average | Intensity RSD |
|-------------|-----------------------|-------------------|---------------|
| 63Cu (KED)  | 28.831 ppb            | 508,924 cps       | 1.1 %         |
| 64Zn (KED)  | 163.173 ppb           | 698,836 cps       | 1.3 %         |
| 69Ga (KED)  | 3.317 ppb             | 17,826 cps        | 1.4 %         |
| 75As (KED)  | 0.425 ppb             | 593 cps           | 6.5 %         |
| 80Se (KED)  | 2.999 ppb             | 1,909 cps         | 2.5 %         |
| 85Rb (KED)  | 2.284 ppb             | 10,913 cps        | 3.5 %         |
| 88Sr (KED)  | 8.828 ppb             | 57,420 cps        | 1.7 %         |
| 107Ag (KED) | 0.147 ppb             | 6,791 cps         | 0.5 %         |
| 114Cd (KED) | 0.466 ppb             | 8,027 cps         | 1.9 %         |
| 133Cs (KED) | 0.073 ppb             | 1,876 cps         | 3.2 %         |
| 138Ba (KED) | 10.826 ppb            | 384,683 cps       | 1.3 %         |
| 139La (KED) | 0.510 ppb             | 36,226 cps        | 0.2 %         |
| 140Ce (KED) | 0.964 ppb             | 92,707 cps        | 1.7 %         |
| 141Pr (KED) | 0.119 ppb             | 11,568 cps        | 0.2 %         |
| 142Nd (KED) | 0.589 ppb             | 24,770 cps        | 0.7 %         |
| 152Sm (KED) | 0.084 ppb             | 3,312 cps         | 3.2 %         |
| 153Eu (KED) | 0.017 ppb             | 1,276 cps         | 3.8 %         |
| 158Gd (KED) | 0.076 ppb             | 4,077 cps         | 2.7 %         |
| 164Dy (KED) | 0.055 ppb             | 3,194 cps         | 2.8 %         |
| 165Ho (KED) | 0.010 ppb             | 2,006 cps         | 8.1 %         |
| 166Er (KED) | 0.026 ppb             | 1,876 cps         | 6.0 %         |
| 169Tm (KED) | 0.003 ppb             | 804 cps           | 4.9 %         |
| 174Yb (KED) | 0.020 ppb             | 1,702 cps         | 2.9 %         |
| 175Lu (KED) | 0.003 ppb             | 389 cps           | 4.1 %         |
| 205Tl (KED) | 0.008 ppb             | 1,432 cps         | 1.7 %         |
| 208Pb (KED) | 3.405 ppb             | 416,497 cps       | 2.3 %         |
| 232Th (KED) | 0.095 ppb             | 22,627 cps        | 1.7 %         |
| 238U (KED)  | 0.027 ppb             | 7,400 cps         | 2.7 %         |

## Sample Summary

Instrument ID: iCAP Q

Analysis index: 16

Analysis name: 18008jian

Analysis started at: 8/27/2021 5:16:00 PM

User name: WINDOWS-UPCI4ER\Administrator

| Category    | Concentration average | Concentration RSD |
|-------------|-----------------------|-------------------|
| 9Be (KED)   | 0.047 ppb             | 34.6 %            |
| 11B (KED)   | 6.235 ppb             | 8.6 %             |
| 24Mg (KED)  | 687.403 ppb           | 1.5 %             |
| 27Al (KED)  | 379.286 ppb           | 2.1 %             |
| 51V (KED)   | 0.803 ppb             | 1.5 %             |
| 52Cr (KED)  | 4.327 ppb             | 2.7 %             |
| 55Mn (KED)  | 17.772 ppb            | 1.2 %             |
| 56Fe (KED)  | 331.839 ppb           | 0.5 %             |
| 58Ni (KED)  | 2.319 ppb             | 1.9 %             |
| 59Co (KED)  | 0.569 ppb             | 111.0 %           |
| 63Cu (KED)  | 13.164 ppb            | 0.3 %             |
| 64Zn (KED)  | 177.423 ppb           | 0.4 %             |
| 69Ga (KED)  | 2.594 ppb             | 1.0 %             |
| 75As (KED)  | 0.435 ppb             | 11.0 %            |
| 80Se (KED)  | 3.459 ppb             | 5.5 %             |
| 85Rb (KED)  | 2.365 ppb             | 4.1 %             |
| 88Sr (KED)  | 8.774 ppb             | 1.6 %             |
| 107Ag (KED) | 0.142 ppb             | 3.7 %             |
| 114Cd (KED) | 0.589 ppb             | 1.9 %             |
| 133Cs (KED) | 0.066 ppb             | 3.7 %             |
| 138Ba (KED) | 8.631 ppb             | 2.6 %             |
| 139La (KED) | 0.353 ppb             | 1.4 %             |
| 140Ce (KED) | 0.732 ppb             | 0.3 %             |
| 141Pr (KED) | 0.084 ppb             | 1.6 %             |
| 142Nd (KED) | 0.426 ppb             | 1.7 %             |
| 152Sm (KED) | 0.058 ppb             | 3.1 %             |
| 153Eu (KED) | 0.014 ppb             | 0.6 %             |
| 158Gd (KED) | 0.055 ppb             | 8.2 %             |
| 164Dy (KED) | 0.040 ppb             | 5.6 %             |
| 165Ho (KED) | 0.008 ppb             | 3.2 %             |
| 166Er (KED) | 0.025 ppb             | 8.4 %             |
| 169Tm (KED) | 0.003 ppb             | 7.0 %             |
| 174Yb (KED) | 0.016 ppb             | 7.9 %             |
| 175Lu (KED) | 0.003 ppb             | 14.2 %            |
| 205Tl (KED) | 0.008 ppb             | 8.2 %             |
| 208Pb (KED) | 1.290 ppb             | 1.4 %             |
| 232Th (KED) | 0.090 ppb             | 1.4 %             |
| 238U (KED)  | 0.024 ppb             | 1.8 %             |

| Category   | Concentration average | Intensity average | Intensity RSD |
|------------|-----------------------|-------------------|---------------|
| 9Be (KED)  | 0.047 ppb             | 6 cps             | 34.6 %        |
| 11B (KED)  | 6.235 ppb             | 441 cps           | 7.9 %         |
| 24Mg (KED) | 687.403 ppb           | 321,312 cps       | 1.5 %         |
| 27Al (KED) | 379.286 ppb           | 43,776 cps        | 2.1 %         |
| 51V (KED)  | 0.803 ppb             | 5,996 cps         | 1.5 %         |
| 52Cr (KED) | 4.327 ppb             | 50,394 cps        | 2.7 %         |
| 55Mn (KED) | 17.772 ppb            | 96,721 cps        | 1.2 %         |
| 56Fe (KED) | 331.839 ppb           | 3,476,964 cps     | 0.5 %         |
| 58Ni (KED) | 2.319 ppb             | 34,325 cps        | 1.8 %         |
| 59Co (KED) | 0.569 ppb             | 12,956 cps        | 111.0 %       |

| Category    | Concentration average | Intensity average | Intensity RSD |
|-------------|-----------------------|-------------------|---------------|
| 63Cu (KED)  | 13.164 ppb            | 232,824 cps       | 0.3 %         |
| 64Zn (KED)  | 177.423 ppb           | 759,799 cps       | 0.4 %         |
| 69Ga (KED)  | 2.594 ppb             | 13,974 cps        | 1.0 %         |
| 75As (KED)  | 0.435 ppb             | 606 cps           | 9.9 %         |
| 80Se (KED)  | 3.459 ppb             | 2,075 cps         | 3.3 %         |
| 85Rb (KED)  | 2.365 ppb             | 11,300 cps        | 4.1 %         |
| 88Sr (KED)  | 8.774 ppb             | 57,066 cps        | 1.6 %         |
| 107Ag (KED) | 0.142 ppb             | 6,537 cps         | 3.6 %         |
| 114Cd (KED) | 0.589 ppb             | 10,130 cps        | 1.9 %         |
| 133Cs (KED) | 0.066 ppb             | 1,712 cps         | 3.5 %         |
| 138Ba (KED) | 8.631 ppb             | 307,345 cps       | 2.5 %         |
| 139La (KED) | 0.353 ppb             | 25,105 cps        | 1.4 %         |
| 140Ce (KED) | 0.732 ppb             | 70,440 cps        | 0.3 %         |
| 141Pr (KED) | 0.084 ppb             | 8,166 cps         | 1.6 %         |
| 142Nd (KED) | 0.426 ppb             | 17,915 cps        | 1.7 %         |
| 152Sm (KED) | 0.058 ppb             | 2,307 cps         | 3.1 %         |
| 153Eu (KED) | 0.014 ppb             | 990 cps           | 0.6 %         |
| 158Gd (KED) | 0.055 ppb             | 2,924 cps         | 8.2 %         |
| 164Dy (KED) | 0.040 ppb             | 2,290 cps         | 5.6 %         |
| 165Ho (KED) | 0.008 ppb             | 1,577 cps         | 3.2 %         |
| 166Er (KED) | 0.025 ppb             | 1,777 cps         | 8.2 %         |
| 169Tm (KED) | 0.003 ppb             | 604 cps           | 7.0 %         |
| 174Yb (KED) | 0.016 ppb             | 1,392 cps         | 7.9 %         |
| 175Lu (KED) | 0.003 ppb             | 328 cps           | 14.2 %        |
| 205Tl (KED) | 0.008 ppb             | 1,366 cps         | 8.2 %         |
| 208Pb (KED) | 1.290 ppb             | 158,633 cps       | 1.4 %         |
| 232Th (KED) | 0.090 ppb             | 21,387 cps        | 1.3 %         |
| 238U (KED)  | 0.024 ppb             | 6,445 cps         | 1.8 %         |

## Sample Summary

Instrument ID: iCAP Q

Analysis index: 17

Analysis name: 1701189jian

Analysis started at: 8/27/2021 5:19:19 PM

User name: WINDOWS-UPCI4ER\Administrator

| Category    | Concentration average | Concentration RSD |
|-------------|-----------------------|-------------------|
| 9Be (KED)   | 0.009 ppb             | 173.2 %           |
| 11B (KED)   | 3.134 ppb             | 4.9 %             |
| 24Mg (KED)  | 420.277 ppb           | 0.4 %             |
| 27Al (KED)  | 245.498 ppb           | 1.3 %             |
| 51V (KED)   | 0.461 ppb             | 2.9 %             |
| 52Cr (KED)  | 4.628 ppb             | 49.1 %            |
| 55Mn (KED)  | 8.008 ppb             | 0.7 %             |
| 56Fe (KED)  | 235.664 ppb           | 2.4 %             |
| 58Ni (KED)  | 1.817 ppb             | 0.9 %             |
| 59Co (KED)  | 0.140 ppb             | 8.4 %             |
| 63Cu (KED)  | 16.072 ppb            | 1.1 %             |
| 64Zn (KED)  | 181.921 ppb           | 0.7 %             |
| 69Ga (KED)  | 4.468 ppb             | 1.7 %             |
| 75As (KED)  | 0.352 ppb             | 13.6 %            |
| 80Se (KED)  | 2.507 ppb             | 4.0 %             |
| 85Rb (KED)  | 4.191 ppb             | 1.9 %             |
| 88Sr (KED)  | 3.677 ppb             | 1.2 %             |
| 107Ag (KED) | 0.343 ppb             | 1.8 %             |
| 114Cd (KED) | 0.386 ppb             | 2.1 %             |
| 133Cs (KED) | 0.041 ppb             | 4.6 %             |
| 138Ba (KED) | 14.427 ppb            | 1.7 %             |
| 139La (KED) | 0.212 ppb             | 0.8 %             |
| 140Ce (KED) | 0.430 ppb             | 1.5 %             |
| 141Pr (KED) | 0.051 ppb             | 3.4 %             |
| 142Nd (KED) | 0.257 ppb             | 2.8 %             |
| 152Sm (KED) | 0.037 ppb             | 1.3 %             |
| 153Eu (KED) | 0.010 ppb             | 17.3 %            |
| 158Gd (KED) | 0.033 ppb             | 8.5 %             |
| 164Dy (KED) | 0.023 ppb             | 4.2 %             |
| 165Ho (KED) | 0.005 ppb             | 7.2 %             |
| 166Er (KED) | 0.013 ppb             | 22.2 %            |
| 169Tm (KED) | 0.002 ppb             | 8.3 %             |
| 174Yb (KED) | 0.010 ppb             | 8.7 %             |
| 175Lu (KED) | 0.002 ppb             | 9.8 %             |
| 205Tl (KED) | 0.008 ppb             | 2.6 %             |
| 208Pb (KED) | 1.514 ppb             | 3.5 %             |
| 232Th (KED) | 0.061 ppb             | 4.7 %             |
| 238U (KED)  | 0.018 ppb             | 3.5 %             |

| Category   | Concentration average | Intensity average | Intensity RSD |
|------------|-----------------------|-------------------|---------------|
| 9Be (KED)  | 0.009 ppb             | 1 cps             | 173.2 %       |
| 11B (KED)  | 3.134 ppb             | 240 cps           | 4.2 %         |
| 24Mg (KED) | 420.277 ppb           | 196,522 cps       | 0.4 %         |
| 27Al (KED) | 245.498 ppb           | 28,367 cps        | 1.3 %         |
| 51V (KED)  | 0.461 ppb             | 3,446 cps         | 2.9 %         |
| 52Cr (KED) | 4.628 ppb             | 53,890 cps        | 49.0 %        |
| 55Mn (KED) | 8.008 ppb             | 43,712 cps        | 0.7 %         |
| 56Fe (KED) | 235.664 ppb           | 2,470,872 cps     | 2.4 %         |
| 58Ni (KED) | 1.817 ppb             | 27,280 cps        | 0.9 %         |
| 59Co (KED) | 0.140 ppb             | 3,203 cps         | 8.3 %         |

| Category    | Concentration average | Intensity average | Intensity RSD |
|-------------|-----------------------|-------------------|---------------|
| 63Cu (KED)  | 16.072 ppb            | 284,069 cps       | 1.1 %         |
| 64Zn (KED)  | 181.921 ppb           | 779,038 cps       | 0.7 %         |
| 69Ga (KED)  | 4.468 ppb             | 23,957 cps        | 1.7 %         |
| 75As (KED)  | 0.352 ppb             | 502 cps           | 12.0 %        |
| 80Se (KED)  | 2.507 ppb             | 1,732 cps         | 2.1 %         |
| 85Rb (KED)  | 4.191 ppb             | 19,990 cps        | 1.9 %         |
| 88Sr (KED)  | 3.677 ppb             | 23,965 cps        | 1.2 %         |
| 107Ag (KED) | 0.343 ppb             | 15,667 cps        | 1.7 %         |
| 114Cd (KED) | 0.386 ppb             | 6,652 cps         | 2.0 %         |
| 133Cs (KED) | 0.041 ppb             | 1,090 cps         | 4.2 %         |
| 138Ba (KED) | 14.427 ppb            | 511,586 cps       | 1.7 %         |
| 139La (KED) | 0.212 ppb             | 15,110 cps        | 0.8 %         |
| 140Ce (KED) | 0.430 ppb             | 41,395 cps        | 1.5 %         |
| 141Pr (KED) | 0.051 ppb             | 4,925 cps         | 3.4 %         |
| 142Nd (KED) | 0.257 ppb             | 10,845 cps        | 2.8 %         |
| 152Sm (KED) | 0.037 ppb             | 1,479 cps         | 1.3 %         |
| 153Eu (KED) | 0.010 ppb             | 733 cps           | 17.3 %        |
| 158Gd (KED) | 0.033 ppb             | 1,768 cps         | 8.5 %         |
| 164Dy (KED) | 0.023 ppb             | 1,335 cps         | 4.2 %         |
| 165Ho (KED) | 0.005 ppb             | 930 cps           | 7.2 %         |
| 166Er (KED) | 0.013 ppb             | 991 cps           | 21.2 %        |
| 169Tm (KED) | 0.002 ppb             | 390 cps           | 8.2 %         |
| 174Yb (KED) | 0.010 ppb             | 854 cps           | 8.6 %         |
| 175Lu (KED) | 0.002 ppb             | 188 cps           | 9.8 %         |
| 205Tl (KED) | 0.008 ppb             | 1,389 cps         | 2.6 %         |
| 208Pb (KED) | 1.514 ppb             | 185,977 cps       | 3.4 %         |
| 232Th (KED) | 0.061 ppb             | 14,635 cps        | 4.6 %         |
| 238U (KED)  | 0.018 ppb             | 4,979 cps         | 3.5 %         |

## Sample Summary

Instrument ID: iCAP Q

Analysis index: 18

Analysis name: 1701286jian

Analysis started at: 8/27/2021 5:22:29 PM

User name: WINDOWS-UPCI4ER\Administrator

| Category    | Concentration average | Concentration RSD |
|-------------|-----------------------|-------------------|
| 9Be (KED)   | 0.009 ppb             | 173.2 %           |
| 11B (KED)   | 2.055 ppb             | 19.8 %            |
| 24Mg (KED)  | 307.689 ppb           | 1.8 %             |
| 27Al (KED)  | 255.761 ppb           | 5.6 %             |
| 51V (KED)   | 0.496 ppb             | 1.0 %             |
| 52Cr (KED)  | 2.838 ppb             | 1.6 %             |
| 55Mn (KED)  | 9.942 ppb             | 3.1 %             |
| 56Fe (KED)  | 236.371 ppb           | 1.6 %             |
| 58Ni (KED)  | 1.696 ppb             | 1.5 %             |
| 59Co (KED)  | 0.125 ppb             | 4.1 %             |
| 63Cu (KED)  | 11.559 ppb            | 3.1 %             |
| 64Zn (KED)  | 175.154 ppb           | 1.3 %             |
| 69Ga (KED)  | 1.703 ppb             | 3.4 %             |
| 75As (KED)  | 0.469 ppb             | 7.0 %             |
| 80Se (KED)  | 2.937 ppb             | 3.8 %             |
| 85Rb (KED)  | 1.454 ppb             | 4.2 %             |
| 88Sr (KED)  | 3.859 ppb             | 1.4 %             |
| 107Ag (KED) | 0.101 ppb             | 5.2 %             |
| 114Cd (KED) | 0.523 ppb             | 1.2 %             |
| 133Cs (KED) | 0.040 ppb             | 3.5 %             |
| 138Ba (KED) | 5.520 ppb             | 1.0 %             |
| 139La (KED) | 0.197 ppb             | 3.6 %             |
| 140Ce (KED) | 0.417 ppb             | 3.2 %             |
| 141Pr (KED) | 0.048 ppb             | 2.0 %             |
| 142Nd (KED) | 0.250 ppb             | 3.2 %             |
| 152Sm (KED) | 0.035 ppb             | 2.1 %             |
| 153Eu (KED) | 0.009 ppb             | 2.2 %             |
| 158Gd (KED) | 0.032 ppb             | 5.6 %             |
| 164Dy (KED) | 0.026 ppb             | 5.9 %             |
| 165Ho (KED) | 0.005 ppb             | 4.1 %             |
| 166Er (KED) | 0.014 ppb             | 9.0 %             |
| 169Tm (KED) | 0.002 ppb             | 12.7 %            |
| 174Yb (KED) | 0.015 ppb             | 37.1 %            |
| 175Lu (KED) | 0.001 ppb             | 5.8 %             |
| 205Tl (KED) | 0.010 ppb             | 6.0 %             |
| 208Pb (KED) | 0.936 ppb             | 1.2 %             |
| 232Th (KED) | 0.055 ppb             | 3.5 %             |
| 238U (KED)  | 0.015 ppb             | 1.5 %             |

| Category   | Concentration average | Intensity average | Intensity RSD |
|------------|-----------------------|-------------------|---------------|
| 9Be (KED)  | 0.009 ppb             | 1 cps             | 173.2 %       |
| 11B (KED)  | 2.055 ppb             | 170 cps           | 15.6 %        |
| 24Mg (KED) | 307.689 ppb           | 143,926 cps       | 1.8 %         |
| 27Al (KED) | 255.761 ppb           | 29,549 cps        | 5.5 %         |
| 51V (KED)  | 0.496 ppb             | 3,705 cps         | 1.0 %         |
| 52Cr (KED) | 2.838 ppb             | 33,111 cps        | 1.6 %         |
| 55Mn (KED) | 9.942 ppb             | 54,213 cps        | 3.1 %         |
| 56Fe (KED) | 236.371 ppb           | 2,478,269 cps     | 1.6 %         |
| 58Ni (KED) | 1.696 ppb             | 25,586 cps        | 1.4 %         |
| 59Co (KED) | 0.125 ppb             | 2,844 cps         | 4.1 %         |

| Category    | Concentration average | Intensity average | Intensity RSD |
|-------------|-----------------------|-------------------|---------------|
| 63Cu (KED)  | 11.559 ppb            | 204,537 cps       | 3.1 %         |
| 64Zn (KED)  | 175.154 ppb           | 750,090 cps       | 1.3 %         |
| 69Ga (KED)  | 1.703 ppb             | 9,232 cps         | 3.3 %         |
| 75As (KED)  | 0.469 ppb             | 648 cps           | 6.3 %         |
| 80Se (KED)  | 2.937 ppb             | 1,887 cps         | 2.1 %         |
| 85Rb (KED)  | 1.454 ppb             | 6,965 cps         | 4.1 %         |
| 88Sr (KED)  | 3.859 ppb             | 25,149 cps        | 1.4 %         |
| 107Ag (KED) | 0.101 ppb             | 4,700 cps         | 5.1 %         |
| 114Cd (KED) | 0.523 ppb             | 9,011 cps         | 1.2 %         |
| 133Cs (KED) | 0.040 ppb             | 1,060 cps         | 3.2 %         |
| 138Ba (KED) | 5.520 ppb             | 197,708 cps       | 1.0 %         |
| 139La (KED) | 0.197 ppb             | 13,995 cps        | 3.6 %         |
| 140Ce (KED) | 0.417 ppb             | 40,151 cps        | 3.2 %         |
| 141Pr (KED) | 0.048 ppb             | 4,673 cps         | 2.0 %         |
| 142Nd (KED) | 0.250 ppb             | 10,529 cps        | 3.2 %         |
| 152Sm (KED) | 0.035 ppb             | 1,383 cps         | 2.1 %         |
| 153Eu (KED) | 0.009 ppb             | 638 cps           | 2.2 %         |
| 158Gd (KED) | 0.032 ppb             | 1,742 cps         | 5.6 %         |
| 164Dy (KED) | 0.026 ppb             | 1,480 cps         | 5.9 %         |
| 165Ho (KED) | 0.005 ppb             | 982 cps           | 4.1 %         |
| 166Er (KED) | 0.014 ppb             | 1,003 cps         | 8.6 %         |
| 169Tm (KED) | 0.002 ppb             | 390 cps           | 12.6 %        |
| 174Yb (KED) | 0.015 ppb             | 1,265 cps         | 36.9 %        |
| 175Lu (KED) | 0.001 ppb             | 184 cps           | 5.8 %         |
| 205Tl (KED) | 0.010 ppb             | 1,727 cps         | 6.0 %         |
| 208Pb (KED) | 0.936 ppb             | 115,485 cps       | 1.2 %         |
| 232Th (KED) | 0.055 ppb             | 13,298 cps        | 3.4 %         |
| 238U (KED)  | 0.015 ppb             | 4,215 cps         | 1.5 %         |

## Sample Summary

Instrument ID: iCAP Q

Analysis index: 19

Analysis name: 1701053jian

Analysis started at: 8/27/2021 5:25:37 PM

User name: WINDOWS-UPCI4ER\Administrator

| Category    | Concentration average | Concentration RSD |
|-------------|-----------------------|-------------------|
| 9Be (KED)   | 0.000 ppb             |                   |
| 11B (KED)   | 2.398 ppb             | 13.1 %            |
| 24Mg (KED)  | 413.402 ppb           | 1.6 %             |
| 27Al (KED)  | 544.546 ppb           | 2.0 %             |
| 51V (KED)   | 0.952 ppb             | 4.5 %             |
| 52Cr (KED)  | 2.499 ppb             | 1.3 %             |
| 55Mn (KED)  | 16.379 ppb            | 0.1 %             |
| 56Fe (KED)  | 460.413 ppb           | 0.4 %             |
| 58Ni (KED)  | 2.753 ppb             | 0.7 %             |
| 59Co (KED)  | 0.232 ppb             | 3.0 %             |
| 63Cu (KED)  | 35.039 ppb            | 1.0 %             |
| 64Zn (KED)  | 163.541 ppb           | 0.9 %             |
| 69Ga (KED)  | 2.371 ppb             | 2.7 %             |
| 75As (KED)  | 0.559 ppb             | 7.3 %             |
| 80Se (KED)  | 1.774 ppb             | 9.4 %             |
| 85Rb (KED)  | 2.253 ppb             | 1.5 %             |
| 88Sr (KED)  | 5.084 ppb             | 1.7 %             |
| 107Ag (KED) | 0.074 ppb             | 0.5 %             |
| 114Cd (KED) | 0.305 ppb             | 2.9 %             |
| 133Cs (KED) | 0.089 ppb             | 3.5 %             |
| 138Ba (KED) | 7.933 ppb             | 2.8 %             |
| 139La (KED) | 0.483 ppb             | 1.6 %             |
| 140Ce (KED) | 0.972 ppb             | 1.8 %             |
| 141Pr (KED) | 0.115 ppb             | 3.7 %             |
| 142Nd (KED) | 0.598 ppb             | 1.6 %             |
| 152Sm (KED) | 0.085 ppb             | 6.1 %             |
| 153Eu (KED) | 0.019 ppb             | 4.2 %             |
| 158Gd (KED) | 0.079 ppb             | 3.2 %             |
| 164Dy (KED) | 0.056 ppb             | 2.4 %             |
| 165Ho (KED) | 0.011 ppb             | 4.7 %             |
| 166Er (KED) | 0.032 ppb             | 2.6 %             |
| 169Tm (KED) | 0.004 ppb             | 5.5 %             |
| 174Yb (KED) | 0.028 ppb             | 14.2 %            |
| 175Lu (KED) | 0.004 ppb             | 10.7 %            |
| 205Tl (KED) | 0.013 ppb             | 3.6 %             |
| 208Pb (KED) | 3.294 ppb             | 2.3 %             |
| 232Th (KED) | 0.146 ppb             | 2.3 %             |
| 238U (KED)  | 0.029 ppb             | 12.3 %            |

| Category   | Concentration average | Intensity average | Intensity RSD |
|------------|-----------------------|-------------------|---------------|
| 9Be (KED)  | 0.000 ppb             | 0 cps             |               |
| 11B (KED)  | 2.398 ppb             | 192 cps           | 10.6 %        |
| 24Mg (KED) | 413.402 ppb           | 193,311 cps       | 1.6 %         |
| 27Al (KED) | 544.546 ppb           | 62,810 cps        | 2.0 %         |
| 51V (KED)  | 0.952 ppb             | 7,102 cps         | 4.5 %         |
| 52Cr (KED) | 2.499 ppb             | 29,163 cps        | 1.3 %         |
| 55Mn (KED) | 16.379 ppb            | 89,156 cps        | 0.1 %         |
| 56Fe (KED) | 460.413 ppb           | 4,821,983 cps     | 0.4 %         |
| 58Ni (KED) | 2.753 ppb             | 40,415 cps        | 0.6 %         |
| 59Co (KED) | 0.232 ppb             | 5,297 cps         | 2.9 %         |

| Category    | Concentration average | Intensity average | Intensity RSD |
|-------------|-----------------------|-------------------|---------------|
| 63Cu (KED)  | 35.039 ppb            | 618,338 cps       | 1.0 %         |
| 64Zn (KED)  | 163.541 ppb           | 700,411 cps       | 0.9 %         |
| 69Ga (KED)  | 2.371 ppb             | 12,790 cps        | 2.6 %         |
| 75As (KED)  | 0.559 ppb             | 761 cps           | 6.7 %         |
| 80Se (KED)  | 1.774 ppb             | 1,469 cps         | 4.1 %         |
| 85Rb (KED)  | 2.253 ppb             | 10,767 cps        | 1.5 %         |
| 88Sr (KED)  | 5.084 ppb             | 33,103 cps        | 1.7 %         |
| 107Ag (KED) | 0.074 ppb             | 3,479 cps         | 0.5 %         |
| 114Cd (KED) | 0.305 ppb             | 5,269 cps         | 2.9 %         |
| 133Cs (KED) | 0.089 ppb             | 2,274 cps         | 3.4 %         |
| 138Ba (KED) | 7.933 ppb             | 282,763 cps       | 2.8 %         |
| 139La (KED) | 0.483 ppb             | 34,295 cps        | 1.6 %         |
| 140Ce (KED) | 0.972 ppb             | 93,473 cps        | 1.8 %         |
| 141Pr (KED) | 0.115 ppb             | 11,129 cps        | 3.7 %         |
| 142Nd (KED) | 0.598 ppb             | 25,149 cps        | 1.6 %         |
| 152Sm (KED) | 0.085 ppb             | 3,365 cps         | 6.0 %         |
| 153Eu (KED) | 0.019 ppb             | 1,373 cps         | 4.1 %         |
| 158Gd (KED) | 0.079 ppb             | 4,261 cps         | 3.2 %         |
| 164Dy (KED) | 0.056 ppb             | 3,256 cps         | 2.4 %         |
| 165Ho (KED) | 0.011 ppb             | 2,180 cps         | 4.7 %         |
| 166Er (KED) | 0.032 ppb             | 2,255 cps         | 2.5 %         |
| 169Tm (KED) | 0.004 ppb             | 924 cps           | 5.5 %         |
| 174Yb (KED) | 0.028 ppb             | 2,368 cps         | 14.1 %        |
| 175Lu (KED) | 0.004 ppb             | 504 cps           | 10.7 %        |
| 205Tl (KED) | 0.013 ppb             | 2,187 cps         | 3.6 %         |
| 208Pb (KED) | 3.294 ppb             | 402,918 cps       | 2.3 %         |
| 232Th (KED) | 0.146 ppb             | 34,668 cps        | 2.3 %         |
| 238U (KED)  | 0.029 ppb             | 7,978 cps         | 12.3 %        |

## Sample Summary

Instrument ID: iCAP Q

Analysis index: 20

Analysis name: 1702067jian

Analysis started at: 8/27/2021 5:28:44 PM

User name: WINDOWS-UPCI4ER\Administrator

| Category    | Concentration average | Concentration RSD |
|-------------|-----------------------|-------------------|
| 9Be (KED)   | 0.000 ppb             |                   |
| 11B (KED)   | 3.545 ppb             | 21.6 %            |
| 24Mg (KED)  | 485.638 ppb           | 1.6 %             |
| 27Al (KED)  | 311.112 ppb           | 2.2 %             |
| 51V (KED)   | 0.549 ppb             | 1.6 %             |
| 52Cr (KED)  | 1.167 ppb             | 1.8 %             |
| 55Mn (KED)  | 10.145 ppb            | 2.1 %             |
| 56Fe (KED)  | 270.434 ppb           | 1.1 %             |
| 58Ni (KED)  | 1.561 ppb             | 2.6 %             |
| 59Co (KED)  | 0.142 ppb             | 5.3 %             |
| 63Cu (KED)  | 15.497 ppb            | 1.0 %             |
| 64Zn (KED)  | 203.829 ppb           | 1.1 %             |
| 69Ga (KED)  | 1.551 ppb             | 0.6 %             |
| 75As (KED)  | 0.349 ppb             | 4.2 %             |
| 80Se (KED)  | 3.082 ppb             | 6.6 %             |
| 85Rb (KED)  | 3.310 ppb             | 3.4 %             |
| 88Sr (KED)  | 4.263 ppb             | 1.8 %             |
| 107Ag (KED) | 0.082 ppb             | 1.2 %             |
| 114Cd (KED) | 0.408 ppb             | 2.0 %             |
| 133Cs (KED) | 0.051 ppb             | 2.9 %             |
| 138Ba (KED) | 5.132 ppb             | 2.3 %             |
| 139La (KED) | 0.220 ppb             | 2.0 %             |
| 140Ce (KED) | 0.466 ppb             | 1.4 %             |
| 141Pr (KED) | 0.054 ppb             | 4.5 %             |
| 142Nd (KED) | 0.281 ppb             | 1.1 %             |
| 152Sm (KED) | 0.041 ppb             | 7.2 %             |
| 153Eu (KED) | 0.009 ppb             | 1.6 %             |
| 158Gd (KED) | 0.036 ppb             | 5.3 %             |
| 164Dy (KED) | 0.028 ppb             | 5.0 %             |
| 165Ho (KED) | 0.005 ppb             | 7.1 %             |
| 166Er (KED) | 0.015 ppb             | 4.8 %             |
| 169Tm (KED) | 0.002 ppb             | 5.4 %             |
| 174Yb (KED) | 0.013 ppb             | 10.4 %            |
| 175Lu (KED) | 0.002 ppb             | 5.1 %             |
| 205Tl (KED) | 0.009 ppb             | 2.1 %             |
| 208Pb (KED) | 1.383 ppb             | 1.1 %             |
| 232Th (KED) | 0.066 ppb             | 2.7 %             |
| 238U (KED)  | 0.017 ppb             | 1.6 %             |

| Category   | Concentration average | Intensity average | Intensity RSD |
|------------|-----------------------|-------------------|---------------|
| 9Be (KED)  | 0.000 ppb             | 0 cps             |               |
| 11B (KED)  | 3.545 ppb             | 267 cps           | 18.7 %        |
| 24Mg (KED) | 485.638 ppb           | 227,056 cps       | 1.5 %         |
| 27Al (KED) | 311.112 ppb           | 35,924 cps        | 2.2 %         |
| 51V (KED)  | 0.549 ppb             | 4,102 cps         | 1.6 %         |
| 52Cr (KED) | 1.167 ppb             | 13,704 cps        | 1.8 %         |
| 55Mn (KED) | 10.145 ppb            | 55,318 cps        | 2.1 %         |
| 56Fe (KED) | 270.434 ppb           | 2,834,600 cps     | 1.1 %         |
| 58Ni (KED) | 1.561 ppb             | 23,687 cps        | 2.4 %         |
| 59Co (KED) | 0.142 ppb             | 3,239 cps         | 5.3 %         |

| Category    | Concentration average | Intensity average | Intensity RSD |
|-------------|-----------------------|-------------------|---------------|
| 63Cu (KED)  | 15.497 ppb            | 273,937 cps       | 1.0 %         |
| 64Zn (KED)  | 203.829 ppb           | 872,758 cps       | 1.1 %         |
| 69Ga (KED)  | 1.551 ppb             | 8,421 cps         | 0.6 %         |
| 75As (KED)  | 0.349 ppb             | 499 cps           | 3.7 %         |
| 80Se (KED)  | 3.082 ppb             | 1,939 cps         | 3.8 %         |
| 85Rb (KED)  | 3.310 ppb             | 15,796 cps        | 3.4 %         |
| 88Sr (KED)  | 4.263 ppb             | 27,773 cps        | 1.8 %         |
| 107Ag (KED) | 0.082 ppb             | 3,812 cps         | 1.1 %         |
| 114Cd (KED) | 0.408 ppb             | 7,031 cps         | 2.0 %         |
| 133Cs (KED) | 0.051 ppb             | 1,347 cps         | 2.7 %         |
| 138Ba (KED) | 5.132 ppb             | 184,031 cps       | 2.3 %         |
| 139La (KED) | 0.220 ppb             | 15,668 cps        | 2.0 %         |
| 140Ce (KED) | 0.466 ppb             | 44,866 cps        | 1.4 %         |
| 141Pr (KED) | 0.054 ppb             | 5,244 cps         | 4.5 %         |
| 142Nd (KED) | 0.281 ppb             | 11,841 cps        | 1.1 %         |
| 152Sm (KED) | 0.041 ppb             | 1,645 cps         | 7.1 %         |
| 153Eu (KED) | 0.009 ppb             | 684 cps           | 1.6 %         |
| 158Gd (KED) | 0.036 ppb             | 1,912 cps         | 5.3 %         |
| 164Dy (KED) | 0.028 ppb             | 1,598 cps         | 5.0 %         |
| 165Ho (KED) | 0.005 ppb             | 1,082 cps         | 7.1 %         |
| 166Er (KED) | 0.015 ppb             | 1,116 cps         | 4.6 %         |
| 169Tm (KED) | 0.002 ppb             | 532 cps           | 5.4 %         |
| 174Yb (KED) | 0.013 ppb             | 1,103 cps         | 10.3 %        |
| 175Lu (KED) | 0.002 ppb             | 201 cps           | 5.1 %         |
| 205Tl (KED) | 0.009 ppb             | 1,651 cps         | 2.1 %         |
| 208Pb (KED) | 1.383 ppb             | 169,957 cps       | 1.1 %         |
| 232Th (KED) | 0.066 ppb             | 15,987 cps        | 2.6 %         |
| 238U (KED)  | 0.017 ppb             | 4,738 cps         | 1.6 %         |

## Sample Summary

Instrument ID: iCAP Q

Analysis index: 21

Analysis name: 1801003jian

Analysis started at: 8/27/2021 5:31:55 PM

User name: WINDOWS-UPCI4ER\Administrator

| Category    | Concentration average | Concentration RSD |
|-------------|-----------------------|-------------------|
| 9Be (KED)   | 0.019 ppb             | 86.6 %            |
| 11B (KED)   | 3.751 ppb             | 17.1 %            |
| 24Mg (KED)  | 502.908 ppb           | 0.8 %             |
| 27Al (KED)  | 515.221 ppb           | 1.2 %             |
| 51V (KED)   | 0.886 ppb             | 2.1 %             |
| 52Cr (KED)  | 1.184 ppb             | 1.9 %             |
| 55Mn (KED)  | 18.777 ppb            | 1.0 %             |
| 56Fe (KED)  | 415.611 ppb           | 2.5 %             |
| 58Ni (KED)  | 2.317 ppb             | 0.5 %             |
| 59Co (KED)  | 0.219 ppb             | 3.1 %             |
| 63Cu (KED)  | 27.015 ppb            | 0.8 %             |
| 64Zn (KED)  | 180.839 ppb           | 0.5 %             |
| 69Ga (KED)  | 2.574 ppb             | 5.2 %             |
| 75As (KED)  | 0.804 ppb             | 38.2 %            |
| 80Se (KED)  | 2.544 ppb             | 2.2 %             |
| 85Rb (KED)  | 2.265 ppb             | 1.6 %             |
| 88Sr (KED)  | 6.702 ppb             | 2.1 %             |
| 107Ag (KED) | 0.077 ppb             | 0.7 %             |
| 114Cd (KED) | 0.424 ppb             | 1.2 %             |
| 133Cs (KED) | 0.081 ppb             | 8.3 %             |
| 138Ba (KED) | 8.276 ppb             | 1.3 %             |
| 139La (KED) | 0.465 ppb             | 11.8 %            |
| 140Ce (KED) | 0.921 ppb             | 1.8 %             |
| 141Pr (KED) | 0.104 ppb             | 4.6 %             |
| 142Nd (KED) | 0.533 ppb             | 2.3 %             |
| 152Sm (KED) | 0.076 ppb             | 5.6 %             |
| 153Eu (KED) | 0.016 ppb             | 4.4 %             |
| 158Gd (KED) | 0.069 ppb             | 4.6 %             |
| 164Dy (KED) | 0.051 ppb             | 3.7 %             |
| 165Ho (KED) | 0.009 ppb             | 2.4 %             |
| 166Er (KED) | 0.026 ppb             | 7.7 %             |
| 169Tm (KED) | 0.004 ppb             | 5.6 %             |
| 174Yb (KED) | 0.021 ppb             | 3.3 %             |
| 175Lu (KED) | 0.003 ppb             | 8.4 %             |
| 205Tl (KED) | 0.014 ppb             | 3.1 %             |
| 208Pb (KED) | 2.603 ppb             | 2.6 %             |
| 232Th (KED) | 0.119 ppb             | 0.8 %             |
| 238U (KED)  | 0.027 ppb             | 6.7 %             |

| Category   | Concentration average | Intensity average | Intensity RSD |
|------------|-----------------------|-------------------|---------------|
| 9Be (KED)  | 0.019 ppb             | 2 cps             | 86.6 %        |
| 11B (KED)  | 3.751 ppb             | 280 cps           | 14.9 %        |
| 24Mg (KED) | 502.908 ppb           | 235,124 cps       | 0.8 %         |
| 27Al (KED) | 515.221 ppb           | 59,432 cps        | 1.2 %         |
| 51V (KED)  | 0.886 ppb             | 6,616 cps         | 2.1 %         |
| 52Cr (KED) | 1.184 ppb             | 13,898 cps        | 1.9 %         |
| 55Mn (KED) | 18.777 ppb            | 102,178 cps       | 1.0 %         |
| 56Fe (KED) | 415.611 ppb           | 4,353,308 cps     | 2.5 %         |
| 58Ni (KED) | 2.317 ppb             | 34,294 cps        | 0.5 %         |
| 59Co (KED) | 0.219 ppb             | 5,003 cps         | 3.1 %         |

| Category    | Concentration average | Intensity average | Intensity RSD |
|-------------|-----------------------|-------------------|---------------|
| 63Cu (KED)  | 27.015 ppb            | 476,931 cps       | 0.8 %         |
| 64Zn (KED)  | 180.839 ppb           | 774,412 cps       | 0.5 %         |
| 69Ga (KED)  | 2.574 ppb             | 13,871 cps        | 5.1 %         |
| 75As (KED)  | 0.804 ppb             | 1,067 cps         | 35.9 %        |
| 80Se (KED)  | 2.544 ppb             | 1,746 cps         | 1.2 %         |
| 85Rb (KED)  | 2.265 ppb             | 10,825 cps        | 1.6 %         |
| 88Sr (KED)  | 6.702 ppb             | 43,611 cps        | 2.1 %         |
| 107Ag (KED) | 0.077 ppb             | 3,605 cps         | 0.7 %         |
| 114Cd (KED) | 0.424 ppb             | 7,314 cps         | 1.2 %         |
| 133Cs (KED) | 0.081 ppb             | 2,081 cps         | 8.0 %         |
| 138Ba (KED) | 8.276 ppb             | 294,821 cps       | 1.3 %         |
| 139La (KED) | 0.465 ppb             | 33,004 cps        | 11.8 %        |
| 140Ce (KED) | 0.921 ppb             | 88,530 cps        | 1.8 %         |
| 141Pr (KED) | 0.104 ppb             | 10,095 cps        | 4.6 %         |
| 142Nd (KED) | 0.533 ppb             | 22,425 cps        | 2.3 %         |
| 152Sm (KED) | 0.076 ppb             | 3,013 cps         | 5.6 %         |
| 153Eu (KED) | 0.016 ppb             | 1,203 cps         | 4.4 %         |
| 158Gd (KED) | 0.069 ppb             | 3,698 cps         | 4.6 %         |
| 164Dy (KED) | 0.051 ppb             | 2,949 cps         | 3.7 %         |
| 165Ho (KED) | 0.009 ppb             | 1,898 cps         | 2.4 %         |
| 166Er (KED) | 0.026 ppb             | 1,899 cps         | 7.5 %         |
| 169Tm (KED) | 0.004 ppb             | 854 cps           | 5.6 %         |
| 174Yb (KED) | 0.021 ppb             | 1,802 cps         | 3.3 %         |
| 175Lu (KED) | 0.003 ppb             | 397 cps           | 8.4 %         |
| 205Tl (KED) | 0.014 ppb             | 2,437 cps         | 3.1 %         |
| 208Pb (KED) | 2.603 ppb             | 318,746 cps       | 2.6 %         |
| 232Th (KED) | 0.119 ppb             | 28,392 cps        | 0.8 %         |
| 238U (KED)  | 0.027 ppb             | 7,468 cps         | 6.6 %         |

## Sample Summary

Instrument ID: iCAP Q

Analysis index: 22

Analysis name: 1705021jian

Analysis started at: 8/27/2021 5:35:17 PM

User name: WINDOWS-UPCI4ER\Administrator

| Category    | Concentration average | Concentration RSD |
|-------------|-----------------------|-------------------|
| 9Be (KED)   | 0.009 ppb             | 173.2 %           |
| 11B (KED)   | 5.121 ppb             | 17.2 %            |
| 24Mg (KED)  | 734.280 ppb           | 1.0 %             |
| 27Al (KED)  | 466.505 ppb           | 0.8 %             |
| 51V (KED)   | 0.853 ppb             | 1.2 %             |
| 52Cr (KED)  | 1.372 ppb             | 1.8 %             |
| 55Mn (KED)  | 18.804 ppb            | 1.8 %             |
| 56Fe (KED)  | 402.573 ppb           | 1.3 %             |
| 58Ni (KED)  | 2.313 ppb             | 1.0 %             |
| 59Co (KED)  | 0.251 ppb             | 1.8 %             |
| 63Cu (KED)  | 16.079 ppb            | 1.8 %             |
| 64Zn (KED)  | 207.271 ppb           | 0.6 %             |
| 69Ga (KED)  | 2.547 ppb             | 2.4 %             |
| 75As (KED)  | 0.454 ppb             | 5.8 %             |
| 80Se (KED)  | 2.371 ppb             | 2.8 %             |
| 85Rb (KED)  | 4.325 ppb             | 0.8 %             |
| 88Sr (KED)  | 8.435 ppb             | 2.4 %             |
| 107Ag (KED) | 0.067 ppb             | 2.5 %             |
| 114Cd (KED) | 0.421 ppb             | 3.0 %             |
| 133Cs (KED) | 0.080 ppb             | 2.1 %             |
| 138Ba (KED) | 8.430 ppb             | 0.7 %             |
| 139La (KED) | 0.389 ppb             | 1.5 %             |
| 140Ce (KED) | 0.794 ppb             | 1.9 %             |
| 141Pr (KED) | 0.096 ppb             | 3.8 %             |
| 142Nd (KED) | 0.487 ppb             | 2.4 %             |
| 152Sm (KED) | 0.070 ppb             | 1.3 %             |
| 153Eu (KED) | 0.016 ppb             | 2.9 %             |
| 158Gd (KED) | 0.064 ppb             | 2.3 %             |
| 164Dy (KED) | 0.049 ppb             | 8.2 %             |
| 165Ho (KED) | 0.009 ppb             | 2.8 %             |
| 166Er (KED) | 0.023 ppb             | 5.3 %             |
| 169Tm (KED) | 0.003 ppb             | 8.9 %             |
| 174Yb (KED) | 0.019 ppb             | 2.4 %             |
| 175Lu (KED) | 0.003 ppb             | 14.2 %            |
| 205Tl (KED) | 0.011 ppb             | 5.4 %             |
| 208Pb (KED) | 2.166 ppb             | 1.2 %             |
| 232Th (KED) | 0.111 ppb             | 4.3 %             |
| 238U (KED)  | 0.030 ppb             | 3.8 %             |

| Category   | Concentration average | Intensity average | Intensity RSD |
|------------|-----------------------|-------------------|---------------|
| 9Be (KED)  | 0.009 ppb             | 1 cps             | 173.2 %       |
| 11B (KED)  | 5.121 ppb             | 369 cps           | 15.5 %        |
| 24Mg (KED) | 734.280 ppb           | 343,212 cps       | 1.0 %         |
| 27Al (KED) | 466.505 ppb           | 53,821 cps        | 0.8 %         |
| 51V (KED)  | 0.853 ppb             | 6,364 cps         | 1.2 %         |
| 52Cr (KED) | 1.372 ppb             | 16,085 cps        | 1.8 %         |
| 55Mn (KED) | 18.804 ppb            | 102,321 cps       | 1.8 %         |
| 56Fe (KED) | 402.573 ppb           | 4,216,918 cps     | 1.3 %         |
| 58Ni (KED) | 2.313 ppb             | 34,237 cps        | 1.0 %         |
| 59Co (KED) | 0.251 ppb             | 5,718 cps         | 1.8 %         |

| Category    | Concentration average | Intensity average | Intensity RSD |
|-------------|-----------------------|-------------------|---------------|
| 63Cu (KED)  | 16.079 ppb            | 284,182 cps       | 1.8 %         |
| 64Zn (KED)  | 207.271 ppb           | 887,484 cps       | 0.6 %         |
| 69Ga (KED)  | 2.547 ppb             | 13,728 cps        | 2.4 %         |
| 75As (KED)  | 0.454 ppb             | 630 cps           | 5.2 %         |
| 80Se (KED)  | 2.371 ppb             | 1,683 cps         | 1.4 %         |
| 85Rb (KED)  | 4.325 ppb             | 20,626 cps        | 0.8 %         |
| 88Sr (KED)  | 8.435 ppb             | 54,866 cps        | 2.4 %         |
| 107Ag (KED) | 0.067 ppb             | 3,174 cps         | 2.5 %         |
| 114Cd (KED) | 0.421 ppb             | 7,257 cps         | 3.0 %         |
| 133Cs (KED) | 0.080 ppb             | 2,046 cps         | 2.0 %         |
| 138Ba (KED) | 8.430 ppb             | 300,268 cps       | 0.7 %         |
| 139La (KED) | 0.389 ppb             | 27,614 cps        | 1.5 %         |
| 140Ce (KED) | 0.794 ppb             | 76,362 cps        | 1.9 %         |
| 141Pr (KED) | 0.096 ppb             | 9,271 cps         | 3.8 %         |
| 142Nd (KED) | 0.487 ppb             | 20,486 cps        | 2.4 %         |
| 152Sm (KED) | 0.070 ppb             | 2,764 cps         | 1.3 %         |
| 153Eu (KED) | 0.016 ppb             | 1,168 cps         | 2.9 %         |
| 158Gd (KED) | 0.064 ppb             | 3,458 cps         | 2.3 %         |
| 164Dy (KED) | 0.049 ppb             | 2,815 cps         | 8.2 %         |
| 165Ho (KED) | 0.009 ppb             | 1,841 cps         | 2.8 %         |
| 166Er (KED) | 0.023 ppb             | 1,686 cps         | 5.2 %         |
| 169Tm (KED) | 0.003 ppb             | 732 cps           | 8.9 %         |
| 174Yb (KED) | 0.019 ppb             | 1,638 cps         | 2.4 %         |
| 175Lu (KED) | 0.003 ppb             | 407 cps           | 14.2 %        |
| 205Tl (KED) | 0.011 ppb             | 1,951 cps         | 5.4 %         |
| 208Pb (KED) | 2.166 ppb             | 265,426 cps       | 1.2 %         |
| 232Th (KED) | 0.111 ppb             | 26,399 cps        | 4.2 %         |
| 238U (KED)  | 0.030 ppb             | 8,160 cps         | 3.8 %         |

## Sample Summary

Instrument ID: iCAP Q

Analysis index: 23

Analysis name: 1802135jian

Analysis started at: 8/27/2021 5:38:28 PM

User name: WINDOWS-UPCI4ER\Administrator

| Category    | Concentration average | Concentration RSD |
|-------------|-----------------------|-------------------|
| 9Be (KED)   | 0.009 ppb             | 173.2 %           |
| 11B (KED)   | 6.611 ppb             | 8.5 %             |
| 24Mg (KED)  | 516.261 ppb           | 0.7 %             |
| 27Al (KED)  | 596.017 ppb           | 0.7 %             |
| 51V (KED)   | 1.092 ppb             | 3.0 %             |
| 52Cr (KED)  | 1.661 ppb             | 0.1 %             |
| 55Mn (KED)  | 21.007 ppb            | 1.1 %             |
| 56Fe (KED)  | 501.683 ppb           | 1.9 %             |
| 58Ni (KED)  | 2.444 ppb             | 2.0 %             |
| 59Co (KED)  | 0.262 ppb             | 2.7 %             |
| 63Cu (KED)  | 14.251 ppb            | 2.4 %             |
| 64Zn (KED)  | 167.811 ppb           | 1.0 %             |
| 69Ga (KED)  | 2.808 ppb             | 1.3 %             |
| 75As (KED)  | 0.701 ppb             | 2.7 %             |
| 80Se (KED)  | 1.836 ppb             | 5.9 %             |
| 85Rb (KED)  | 2.803 ppb             | 2.0 %             |
| 88Sr (KED)  | 6.586 ppb             | 1.9 %             |
| 107Ag (KED) | 0.065 ppb             | 3.2 %             |
| 114Cd (KED) | 0.254 ppb             | 1.6 %             |
| 133Cs (KED) | 0.097 ppb             | 3.0 %             |
| 138Ba (KED) | 9.119 ppb             | 0.9 %             |
| 139La (KED) | 0.525 ppb             | 3.5 %             |
| 140Ce (KED) | 1.100 ppb             | 1.9 %             |
| 141Pr (KED) | 0.129 ppb             | 0.4 %             |
| 142Nd (KED) | 0.665 ppb             | 0.9 %             |
| 152Sm (KED) | 0.094 ppb             | 4.9 %             |
| 153Eu (KED) | 0.022 ppb             | 1.9 %             |
| 158Gd (KED) | 0.086 ppb             | 0.7 %             |
| 164Dy (KED) | 0.062 ppb             | 4.7 %             |
| 165Ho (KED) | 0.012 ppb             | 4.4 %             |
| 166Er (KED) | 0.037 ppb             | 1.3 %             |
| 169Tm (KED) | 0.004 ppb             | 3.3 %             |
| 174Yb (KED) | 0.027 ppb             | 6.9 %             |
| 175Lu (KED) | 0.004 ppb             | 7.4 %             |
| 205Tl (KED) | 0.015 ppb             | 3.4 %             |
| 208Pb (KED) | 1.604 ppb             | 0.9 %             |
| 232Th (KED) | 0.141 ppb             | 1.1 %             |
| 238U (KED)  | 0.028 ppb             | 3.1 %             |

| Category   | Concentration average | Intensity average | Intensity RSD |
|------------|-----------------------|-------------------|---------------|
| 9Be (KED)  | 0.009 ppb             | 1 cps             | 173.2 %       |
| 11B (KED)  | 6.611 ppb             | 466 cps           | 7.9 %         |
| 24Mg (KED) | 516.261 ppb           | 241,362 cps       | 0.7 %         |
| 27Al (KED) | 596.017 ppb           | 68,738 cps        | 0.7 %         |
| 51V (KED)  | 1.092 ppb             | 8,146 cps         | 3.0 %         |
| 52Cr (KED) | 1.661 ppb             | 19,437 cps        | 0.1 %         |
| 55Mn (KED) | 21.007 ppb            | 114,283 cps       | 1.1 %         |
| 56Fe (KED) | 501.683 ppb           | 5,253,712 cps     | 1.9 %         |
| 58Ni (KED) | 2.444 ppb             | 36,083 cps        | 1.9 %         |
| 59Co (KED) | 0.262 ppb             | 5,966 cps         | 2.7 %         |

| Category    | Concentration average | Intensity average | Intensity RSD |
|-------------|-----------------------|-------------------|---------------|
| 63Cu (KED)  | 14.251 ppb            | 251,975 cps       | 2.4 %         |
| 64Zn (KED)  | 167.811 ppb           | 718,677 cps       | 1.0 %         |
| 69Ga (KED)  | 2.808 ppb             | 15,116 cps        | 1.3 %         |
| 75As (KED)  | 0.701 ppb             | 939 cps           | 2.5 %         |
| 80Se (KED)  | 1.836 ppb             | 1,491 cps         | 2.6 %         |
| 85Rb (KED)  | 2.803 ppb             | 13,383 cps        | 1.9 %         |
| 88Sr (KED)  | 6.586 ppb             | 42,860 cps        | 1.9 %         |
| 107Ag (KED) | 0.065 ppb             | 3,064 cps         | 3.1 %         |
| 114Cd (KED) | 0.254 ppb             | 4,394 cps         | 1.6 %         |
| 133Cs (KED) | 0.097 ppb             | 2,457 cps         | 2.9 %         |
| 138Ba (KED) | 9.119 ppb             | 324,551 cps       | 0.8 %         |
| 139La (KED) | 0.525 ppb             | 37,301 cps        | 3.5 %         |
| 140Ce (KED) | 1.100 ppb             | 105,678 cps       | 1.9 %         |
| 141Pr (KED) | 0.129 ppb             | 12,543 cps        | 0.4 %         |
| 142Nd (KED) | 0.665 ppb             | 27,948 cps        | 0.9 %         |
| 152Sm (KED) | 0.094 ppb             | 3,733 cps         | 4.9 %         |
| 153Eu (KED) | 0.022 ppb             | 1,587 cps         | 1.9 %         |
| 158Gd (KED) | 0.086 ppb             | 4,590 cps         | 0.7 %         |
| 164Dy (KED) | 0.062 ppb             | 3,565 cps         | 4.7 %         |
| 165Ho (KED) | 0.012 ppb             | 2,408 cps         | 4.4 %         |
| 166Er (KED) | 0.037 ppb             | 2,665 cps         | 1.3 %         |
| 169Tm (KED) | 0.004 ppb             | 964 cps           | 3.3 %         |
| 174Yb (KED) | 0.027 ppb             | 2,284 cps         | 6.8 %         |
| 175Lu (KED) | 0.004 ppb             | 538 cps           | 7.4 %         |
| 205Tl (KED) | 0.015 ppb             | 2,628 cps         | 3.3 %         |
| 208Pb (KED) | 1.604 ppb             | 196,953 cps       | 0.9 %         |
| 232Th (KED) | 0.141 ppb             | 33,513 cps        | 1.1 %         |
| 238U (KED)  | 0.028 ppb             | 7,778 cps         | 3.1 %         |
