# Supplementary material for: Geographic and breed-specific traceability of cashmere via mineral element profiling in Inner Mongolia (Ordos, Chifeng, and Alxa League)
Source: Royal Society of Chemistry journal article supplement (doi:10.1039/d5ra08122j), 2026-01-01
Supplement: d5ra08122j1.zip [file 20210830-chi feng 6+a zuo qi 14.pdf › ԭʼ޿/20210830-chi feng 6+a zuo qi 14.pdf]

## Instrument Summary:

Instrument ID: iCAP Q  
Serial Number: Undefined

## Labbook Summary:

Path and filename: \_Application Data\Workspace\LabBooks\wlw\20210830-1.imexp  
Labbook created by: Administrator  
Based on template:  
Hardware configuration: iCAPQ1  
Labbook type: eQuant  
Qtegra version (last saved): 2.7.2425.154  
Labbook started: 8/30/2021 4:15:20 PM  
Labbook finished: 8/30/2021 5:30:53 PM

## Method Summary:

| Isotope     | Mode | Dwell time (s) | # of Channels | Spacing | Resolution | IS |
|-------------|------|----------------|---------------|---------|------------|----|
| 9Be (KED)   | KED  | 0.03           | 3             | 0.1     | Normal     |    |
| 11B (KED)   | KED  | 0.03           | 3             | 0.1     | Normal     |    |
| 24Mg (KED)  | KED  | 0.03           | 3             | 0.1     | Normal     |    |
| 27Al (KED)  | KED  | 0.03           | 3             | 0.1     | Normal     |    |
| 51V (KED)   | KED  | 0.03           | 3             | 0.1     | Normal     |    |
| 52Cr (KED)  | KED  | 0.03           | 3             | 0.1     | Normal     |    |
| 55Mn (KED)  | KED  | 0.03           | 3             | 0.1     | Normal     |    |
| 56Fe (KED)  | KED  | 0.03           | 3             | 0.1     | Normal     |    |
| 58Ni (KED)  | KED  | 0.03           | 3             | 0.1     | Normal     |    |
| 59Co (KED)  | KED  | 0.03           | 3             | 0.1     | Normal     |    |
| 63Cu (KED)  | KED  | 0.03           | 3             | 0.1     | Normal     |    |
| 64Zn (KED)  | KED  | 0.03           | 3             | 0.1     | Normal     |    |
| 69Ga (KED)  | KED  | 0.03           | 3             | 0.1     | Normal     |    |
| 75As (KED)  | KED  | 0.03           | 3             | 0.1     | Normal     |    |
| 80Se (KED)  | KED  | 0.03           | 3             | 0.1     | Normal     |    |
| 85Rb (KED)  | KED  | 0.03           | 3             | 0.1     | Normal     |    |
| 88Sr (KED)  | KED  | 0.03           | 3             | 0.1     | Normal     |    |
| 107Ag (KED) | KED  | 0.03           | 3             | 0.1     | Normal     |    |
| 114Cd (KED) | KED  | 0.03           | 3             | 0.1     | Normal     |    |
| 133Cs (KED) | KED  | 0.03           | 3             | 0.1     | Normal     |    |
| 138Ba (KED) | KED  | 0.03           | 3             | 0.1     | Normal     |    |
| 139La (KED) | KED  | 0.03           | 3             | 0.1     | Normal     |    |
| 140Ce (KED) | KED  | 0.03           | 3             | 0.1     | Normal     |    |
| 141Pr (KED) | KED  | 0.03           | 3             | 0.1     | Normal     |    |
| 142Nd (KED) | KED  | 0.03           | 3             | 0.1     | Normal     |    |
| 152Sm (KED) | KED  | 0.03           | 3             | 0.1     | Normal     |    |
| 153Eu (KED) | KED  | 0.03           | 3             | 0.1     | Normal     |    |
| 158Gd (KED) | KED  | 0.03           | 3             | 0.1     | Normal     |    |
| 164Dy (KED) | KED  | 0.03           | 3             | 0.1     | Normal     |    |
| 165Ho (KED) | KED  | 0.03           | 3             | 0.1     | Normal     |    |
| 166Er (KED) | KED  | 0.03           | 3             | 0.1     | Normal     |    |
| 169Tm (KED) | KED  | 0.03           | 3             | 0.1     | Normal     |    |
| 174Yb (KED) | KED  | 0.03           | 3             | 0.1     | Normal     |    |
| 175Lu (KED) | KED  | 0.03           | 3             | 0.1     | Normal     |    |
| 205Tl (KED) | KED  | 0.03           | 3             | 0.1     | Normal     |    |
| 208Pb (KED) | KED  | 0.03           | 3             | 0.1     | Normal     |    |
| 232Th (KED) | KED  | 0.03           | 3             | 0.1     | Normal     |    |
| 238U (KED)  | KED  | 0.03           | 3             | 0.1     | Normal     |    |

| Isotope    | Mode | Dwell time (s) | # of Channels | Spacing | Resolution |
|------------|------|----------------|---------------|---------|------------|
| 9Be (KED)  | KED  | 0.03           | 3             | 0.1     | Normal     |
| 11B (KED)  | KED  | 0.03           | 3             | 0.1     | Normal     |
| 24Mg (KED) | KED  | 0.03           | 3             | 0.1     | Normal     |
| 27Al (KED) | KED  | 0.03           | 3             | 0.1     | Normal     |
| 51V (KED)  | KED  | 0.03           | 3             | 0.1     | Normal     |
| 52Cr (KED) | KED  | 0.03           | 3             | 0.1     | Normal     |
| 55Mn (KED) | KED  | 0.03           | 3             | 0.1     | Normal     |
| 56Fe (KED) | KED  | 0.03           | 3             | 0.1     | Normal     |
| 58Ni (KED) | KED  | 0.03           | 3             | 0.1     | Normal     |
| 59Co (KED) | KED  | 0.03           | 3             | 0.1     | Normal     |
| 63Cu (KED) | KED  | 0.03           | 3             | 0.1     | Normal     |
| 64Zn (KED) | KED  | 0.03           | 3             | 0.1     | Normal     |
| 69Ga (KED) | KED  | 0.03           | 3             | 0.1     | Normal     |
| 75As (KED) | KED  | 0.03           | 3             | 0.1     | Normal     |
| 80Se (KED) | KED  | 0.03           | 3             | 0.1     | Normal     |
| 85Rb (KED) | KED  | 0.03           | 3             | 0.1     | Normal     |
| 88Sr (KED) | KED  | 0.03           | 3             | 0.1     | Normal     |

| Isotope     | Mode | Dwell time (s) | # of Channels | Spacing | Resolution |
|-------------|------|----------------|---------------|---------|------------|
| 107Ag (KED) | KED  | 0.03           | 3             | 0.1     | Normal     |
| 114Cd (KED) | KED  | 0.03           | 3             | 0.1     | Normal     |
| 133Cs (KED) | KED  | 0.03           | 3             | 0.1     | Normal     |
| 138Ba (KED) | KED  | 0.03           | 3             | 0.1     | Normal     |
| 139La (KED) | KED  | 0.03           | 3             | 0.1     | Normal     |
| 140Ce (KED) | KED  | 0.03           | 3             | 0.1     | Normal     |
| 141Pr (KED) | KED  | 0.03           | 3             | 0.1     | Normal     |
| 142Nd (KED) | KED  | 0.03           | 3             | 0.1     | Normal     |
| 152Sm (KED) | KED  | 0.03           | 3             | 0.1     | Normal     |
| 153Eu (KED) | KED  | 0.03           | 3             | 0.1     | Normal     |
| 158Gd (KED) | KED  | 0.03           | 3             | 0.1     | Normal     |
| 164Dy (KED) | KED  | 0.03           | 3             | 0.1     | Normal     |
| 165Ho (KED) | KED  | 0.03           | 3             | 0.1     | Normal     |
| 166Er (KED) | KED  | 0.03           | 3             | 0.1     | Normal     |
| 169Tm (KED) | KED  | 0.03           | 3             | 0.1     | Normal     |
| 174Yb (KED) | KED  | 0.03           | 3             | 0.1     | Normal     |
| 175Lu (KED) | KED  | 0.03           | 3             | 0.1     | Normal     |
| 205Tl (KED) | KED  | 0.03           | 3             | 0.1     | Normal     |
| 208Pb (KED) | KED  | 0.03           | 3             | 0.1     | Normal     |
| 232Th (KED) | KED  | 0.03           | 3             | 0.1     | Normal     |
| 238U (KED)  | KED  | 0.03           | 3             | 0.1     | Normal     |

| No. of sweeps | Time per sweep[s] | Time per main run[s] |
|---------------|-------------------|----------------------|
| 10            | 3.42              | 34.2                 |

## Calibration Curves:

9Be (KED)

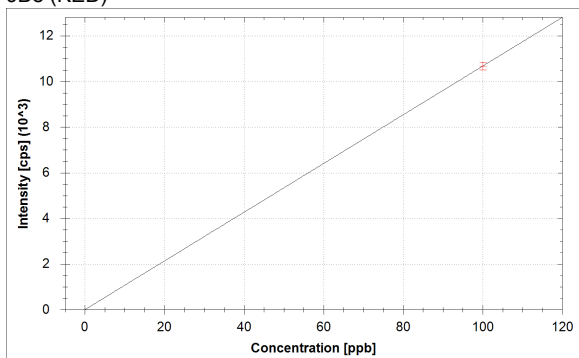

$$f(x) = 106.7235 \cdot x + 1.1111$$

$$R^2 = 1.0000$$

$$\text{BEC} = 0.010 \text{ ppb}$$

$$\text{LoD} = 0.0541 \text{ ppb}$$

11B (KED)

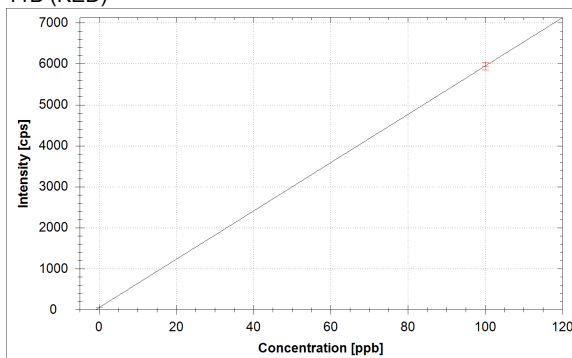

$$f(x) = 58.9143 \cdot x + 53.3335$$

$$R^2 = 1.0000$$

$$\text{BEC} = 0.905 \text{ ppb}$$

$$\text{LoD} = 0.1697 \text{ ppb}$$

24Mg (KED)

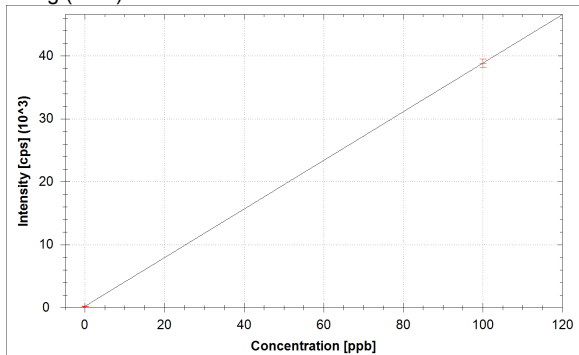

$$f(x) = 386.3589 \cdot x + 195.5574$$

$$R^2 = 1.0000$$

$$\text{BEC} = 0.506 \text{ ppb}$$

$$\text{LoD} = 0.1836 \text{ ppb}$$

27Al (KED)

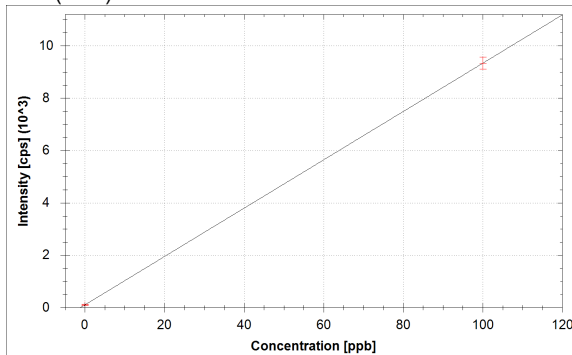

$$f(x) = 92.2905 \cdot x + 102.2227$$

$$R^2 = 1.0000$$

$$\text{BEC} = 1.108 \text{ ppb}$$

$$\text{LoD} = 1.0068 \text{ ppb}$$

51V (KED)

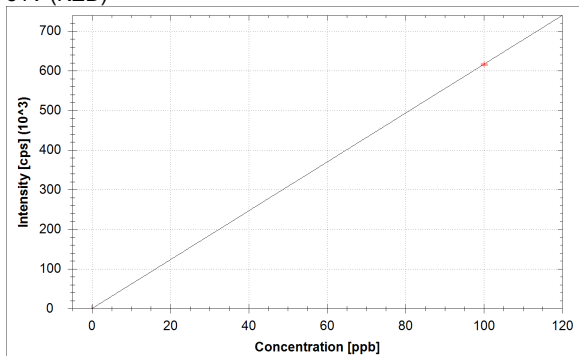

$$f(x) = 6164.0783 \cdot x + 11.1111$$

$$R^2 = 1.0000$$

$$\text{BEC} = 0.002 \text{ ppb}$$

$$\text{LoD} = 0.0037 \text{ ppb}$$

52Cr (KED)

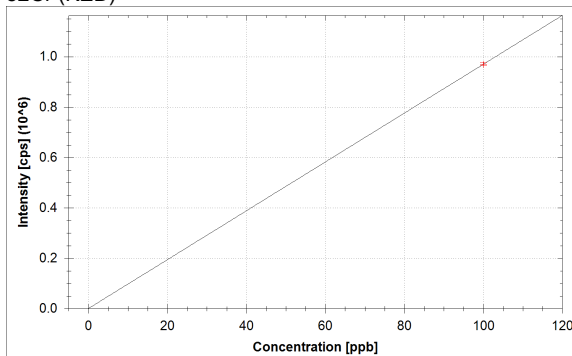

$$f(x) = 9700.4248 \cdot x + 240.0027$$

$$R^2 = 1.0000$$

$$\text{BEC} = 0.025 \text{ ppb}$$

$$\text{LoD} = 0.0162 \text{ ppb}$$

55Mn (KED)

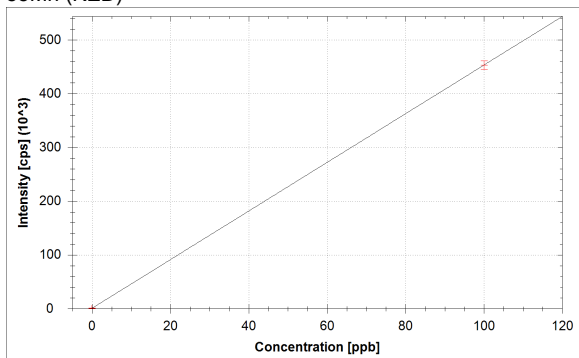

$$f(x) = 4523.0216 \cdot x + 823.3616$$

$$R^2 = 1.0000$$

$$\text{BEC} = 0.182 \text{ ppb}$$

$$\text{LoD} = 0.0378 \text{ ppb}$$

56Fe (KED)

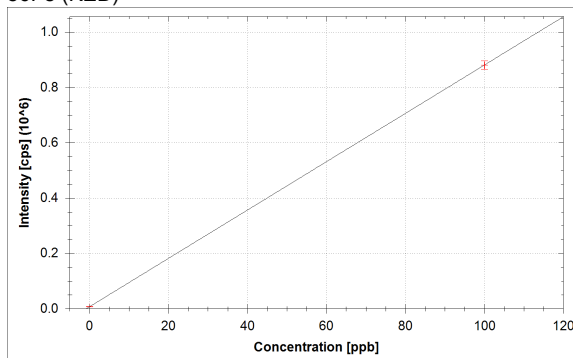

$$f(x) = 8735.8345 \cdot x + 7163.1729$$

$$R^2 = 1.0000$$

$$\text{BEC} = 0.820 \text{ ppb}$$

$$\text{LoD} = 0.1037 \text{ ppb}$$

58Ni (KED)

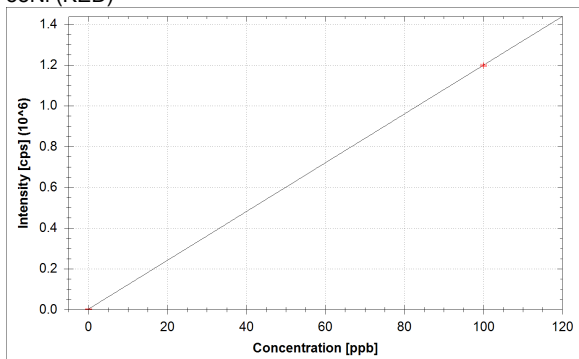

$$f(x) = 11963.5644 \cdot x + 2274.6540$$

$$R^2 = 1.0000$$

$$\text{BEC} = 0.190 \text{ ppb}$$

$$\text{LoD} = 0.0245 \text{ ppb}$$

59Co (KED)

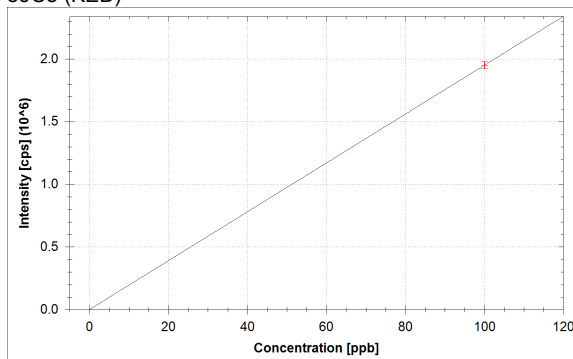

$$f(x) = 19503.3400 \cdot x + 13.3334$$

$$R^2 = 1.0000$$

$$\text{BEC} = 0.001 \text{ ppb}$$

$$\text{LoD} = 0.0005 \text{ ppb}$$

63Cu (KED)

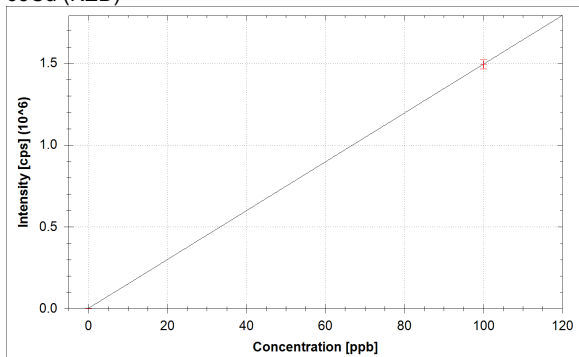

$$f(x) = 14927.2876 \cdot x + 1393.4134$$

$$R^2 = 1.0000$$

$$\text{BEC} = 0.093 \text{ ppb}$$

$$\text{LoD} = 0.0370 \text{ ppb}$$

64Zn (KED)

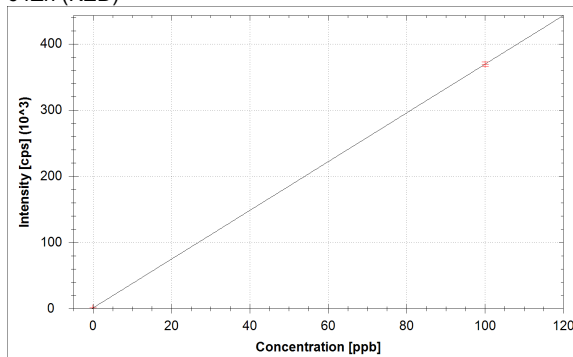

$$f(x) = 3682.4821 \cdot x + 986.7071$$

$$R^2 = 1.0000$$

$$\text{BEC} = 0.268 \text{ ppb}$$

$$\text{LoD} = 0.0394 \text{ ppb}$$

69Ga (KED)

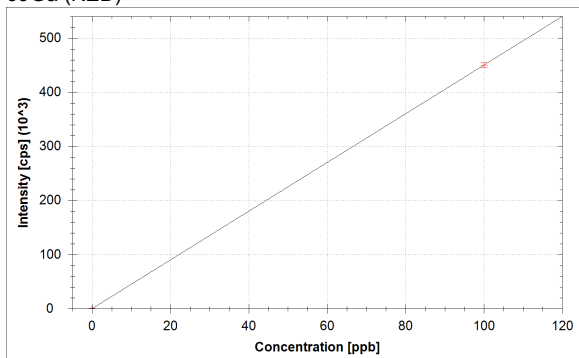

$$f(x) = 4500.7331 \cdot x + 136.6676$$

$$R^2 = 1.0000$$

$$\text{BEC} = 0.030 \text{ ppb}$$

$$\text{LoD} = 0.0333 \text{ ppb}$$

75As (KED)

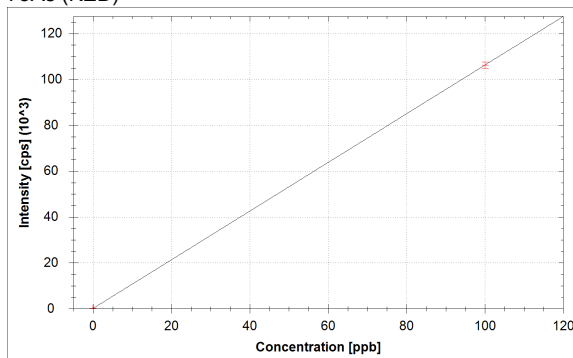

$$f(x) = 1061.2329 \cdot x + 110.0006$$

$$R^2 = 1.0000$$

$$\text{BEC} = 0.104 \text{ ppb}$$

$$\text{LoD} = 0.0000 \text{ ppb}$$

80Se (KED)

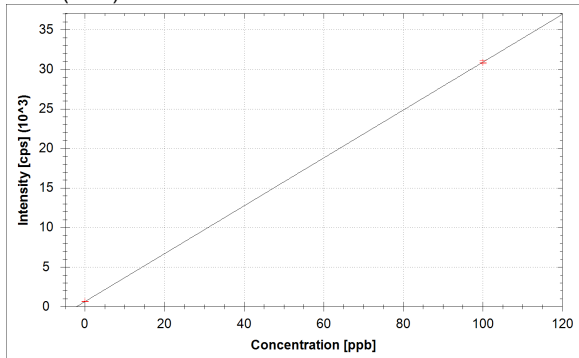

$$f(x) = 302.5931 \cdot x + 625.5720$$

$$R^2 = 1.0000$$

$$\text{BEC} = 2.067 \text{ ppb}$$

$$\text{LoD} = 0.2436 \text{ ppb}$$

85Rb (KED)

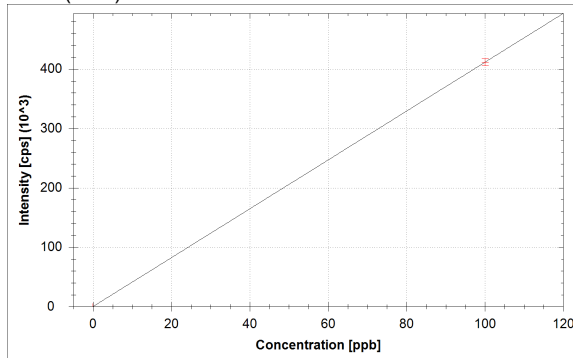

$$f(x) = 4114.2131 \cdot x + 34.4446$$

$$R^2 = 1.0000$$

$$\text{BEC} = 0.008 \text{ ppb}$$

$$\text{LoD} = 0.0028 \text{ ppb}$$

88Sr (KED)

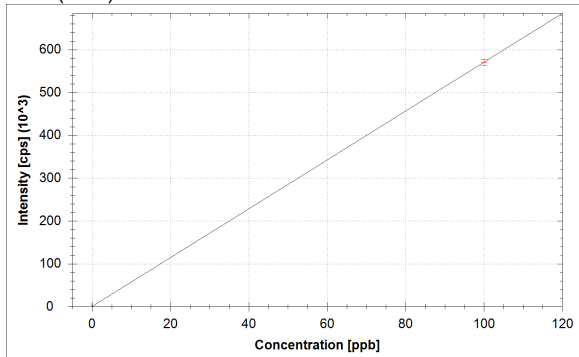

$$f(x) = 5704.3642 \cdot x + 78.8892$$

$$R^2 = 1.0000$$

$$\text{BEC} = 0.014 \text{ ppb}$$

$$\text{LoD} = 0.0044 \text{ ppb}$$

107Ag (KED)

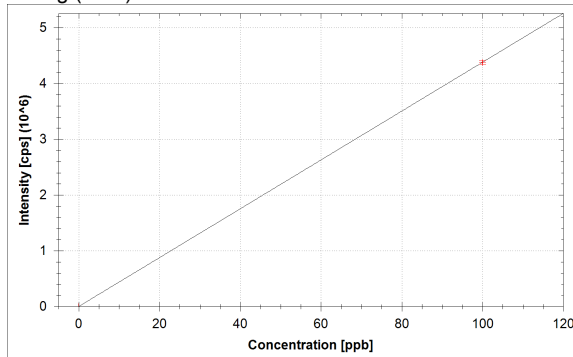

$$f(x) = 43795.8662 \cdot x + 718.9104$$

$$R^2 = 1.0000$$

$$\text{BEC} = 0.016 \text{ ppb}$$

$$\text{LoD} = 0.0009 \text{ ppb}$$

**<sup>114</sup>Cd (KED)**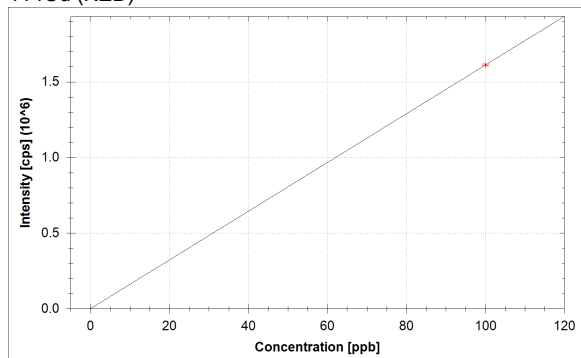

$$f(x) = 16104.4595 \cdot x + 157.7790$$

$$R^2 = 1.0000$$

$$\text{BEC} = 0.010 \text{ ppb}$$

$$\text{LoD} = 0.0025 \text{ ppb}$$

**<sup>133</sup>Cs (KED)**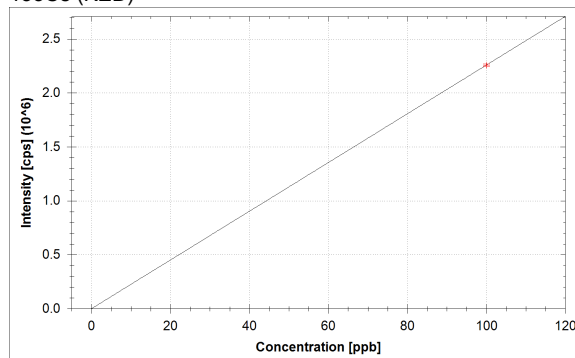

$$f(x) = 22574.0869 \cdot x + 114.4451$$

$$R^2 = 1.0000$$

$$\text{BEC} = 0.005 \text{ ppb}$$

$$\text{LoD} = 0.0026 \text{ ppb}$$

**<sup>138</sup>Ba (KED)**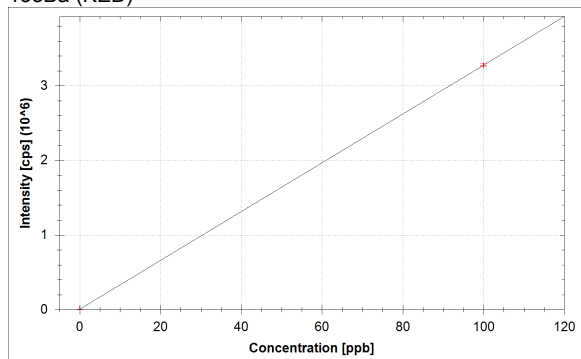

$$f(x) = 32705.9543 \cdot x + 4107.3510$$

$$R^2 = 1.0000$$

$$\text{BEC} = 0.126 \text{ ppb}$$

$$\text{LoD} = 0.0069 \text{ ppb}$$

**<sup>139</sup>La (KED)**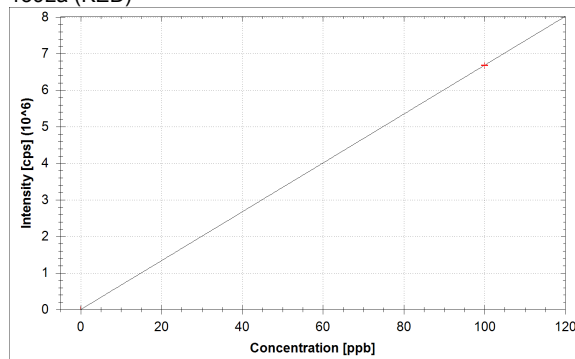

$$f(x) = 66831.8325 \cdot x + 21.1112$$

$$R^2 = 1.0000$$

$$\text{BEC} = 0.000 \text{ ppb}$$

$$\text{LoD} = 0.0004 \text{ ppb}$$

**<sup>140</sup>Ce (KED)**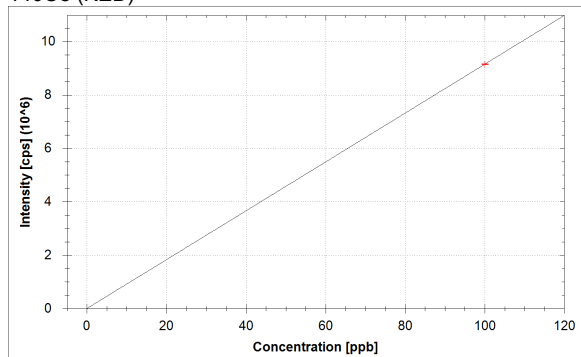

$$f(x) = 91481.7029 \cdot x + 241.1138$$

$$R^2 = 1.0000$$

$$\text{BEC} = 0.003 \text{ ppb}$$

$$\text{LoD} = 0.0005 \text{ ppb}$$

**<sup>141</sup>Pr (KED)**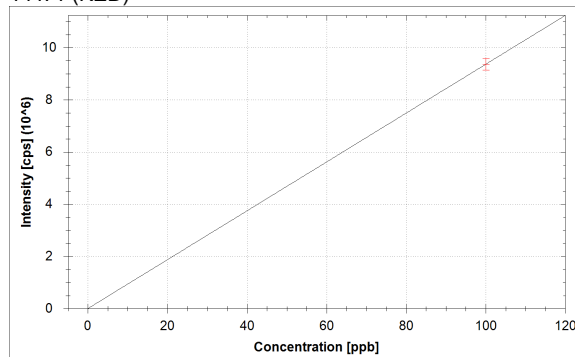

$$f(x) = 93642.7145 \cdot x + 20.0000$$

$$R^2 = 1.0000$$

$$\text{BEC} = 0.000 \text{ ppb}$$

$$\text{LoD} = 0.0001 \text{ ppb}$$

**<sup>142</sup>Nd (KED)**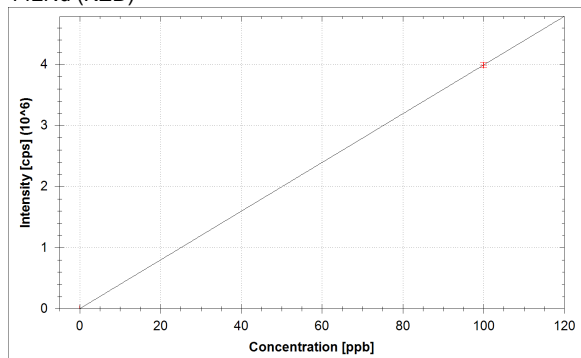

$$f(x) = 39897.5337 \cdot x + 61.1113$$

$$R^2 = 1.0000$$

$$\text{BEC} = 0.002 \text{ ppb}$$

$$\text{LoD} = 0.0006 \text{ ppb}$$

**<sup>152</sup>Sm (KED)**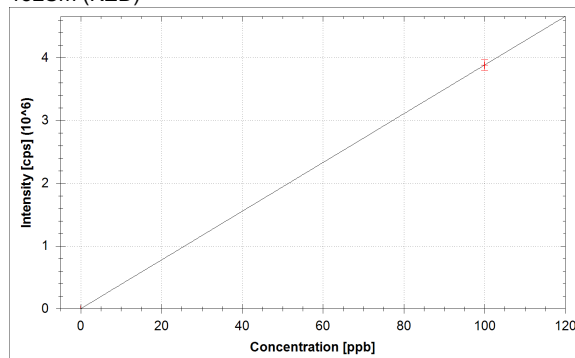

$$f(x) = 38834.6751 \cdot x + 6.6667$$

$$R^2 = 1.0000$$

$$\text{BEC} = 0.000 \text{ ppb}$$

$$\text{LoD} = 0.0000 \text{ ppb}$$

**<sup>153</sup>Eu (KED)**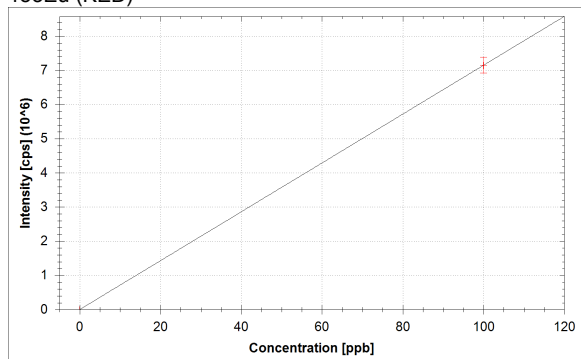

$$f(x) = 71488.4796 \cdot x + 4.4445$$

$$R^2 = 1.0000$$

$$\text{BEC} = 0.000 \text{ ppb}$$

$$\text{LoD} = 0.0002 \text{ ppb}$$

**<sup>158</sup>Gd (KED)**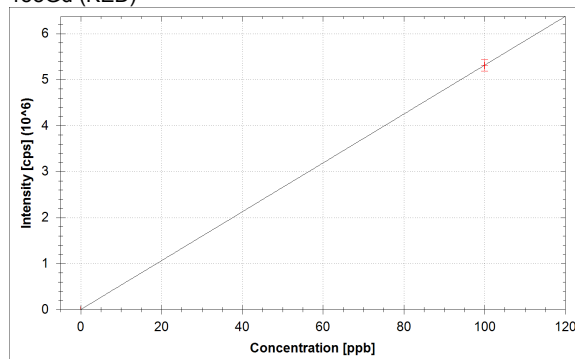

$$f(x) = 53129.1083 \cdot x + 3.3333$$

$$R^2 = 1.0000$$

$$\text{BEC} = 0.000 \text{ ppb}$$

$$\text{LoD} = 0.0000 \text{ ppb}$$

**<sup>164</sup>Dy (KED)**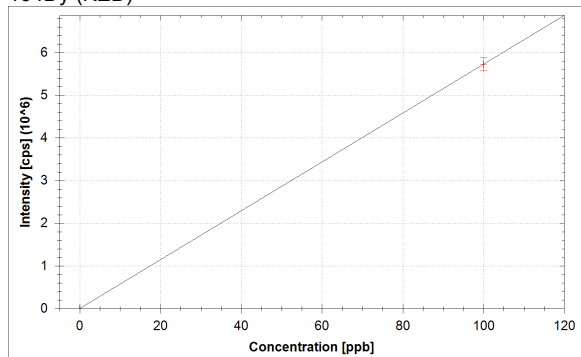

$$f(x) = 57250.8475 \cdot x + 8.8889$$

$$R^2 = 1.0000$$

$$\text{BEC} = 0.000 \text{ ppb}$$

$$\text{LoD} = 0.0001 \text{ ppb}$$

**<sup>165</sup>Ho (KED)**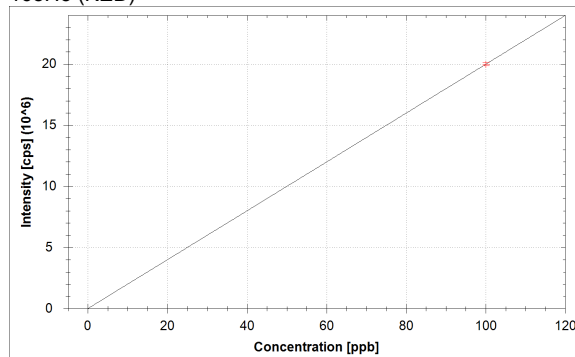

$$f(x) = 199856.0625 \cdot x + 4.4445$$

$$R^2 = 1.0000$$

$$\text{BEC} = 0.000 \text{ ppb}$$

$$\text{LoD} = 0.0000 \text{ ppb}$$

166Er (KED)

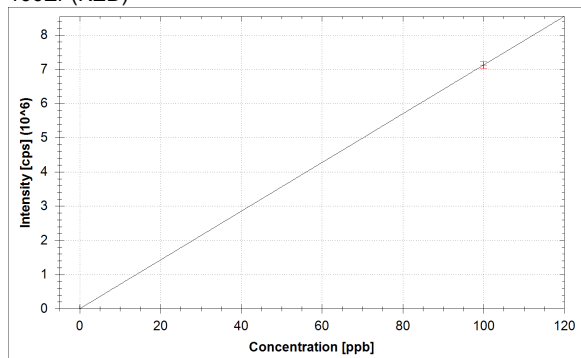

$$f(x) = 71229.6256 \cdot x + 56.6669$$

$$R^2 = 1.0000$$

$$\text{BEC} = 0.001 \text{ ppb}$$

$$\text{LoD} = 0.0005 \text{ ppb}$$

169Tm (KED)

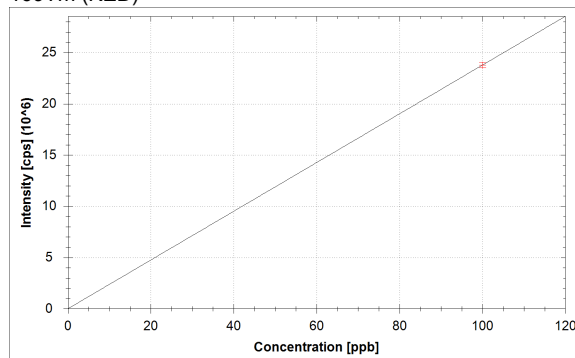

$$f(x) = 237777.0568 \cdot x$$

$$R^2 = 1.0000$$

$$\text{BEC} = 0.000 \text{ ppb}$$

$$\text{LoD} = 0.0000 \text{ ppb}$$

174Yb (KED)

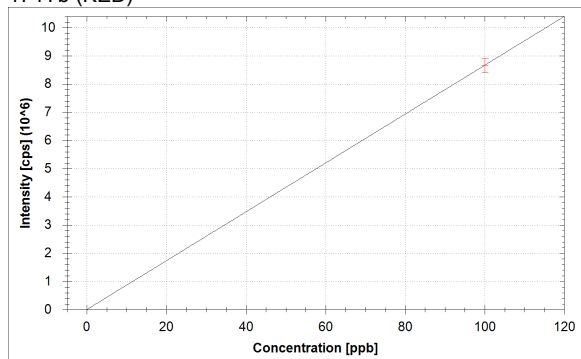

$$f(x) = 86673.9581 \cdot x + 1.1111$$

$$R^2 = 1.0000$$

$$\text{BEC} = 0.000 \text{ ppb}$$

$$\text{LoD} = 0.0001 \text{ ppb}$$

175Lu (KED)

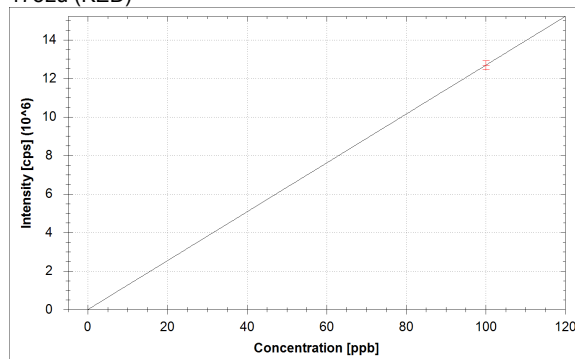

$$f(x) = 126791.5176 \cdot x + 1.1111$$

$$R^2 = 1.0000$$

$$\text{BEC} = 0.000 \text{ ppb}$$

$$\text{LoD} = 0.0000 \text{ ppb}$$

205Tl (KED)

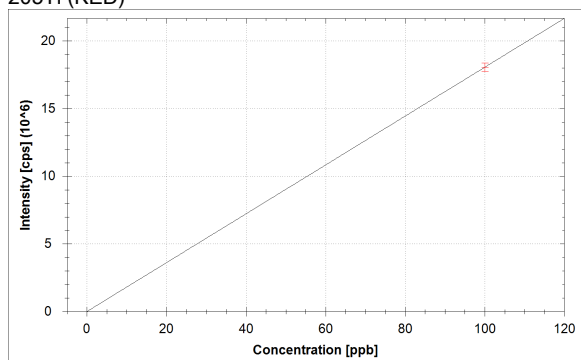

$$f(x) = 180530.4622 \cdot x + 12.2223$$

$$R^2 = 1.0000$$

$$\text{BEC} = 0.000 \text{ ppb}$$

$$\text{LoD} = 0.0000 \text{ ppb}$$

208Pb (KED)

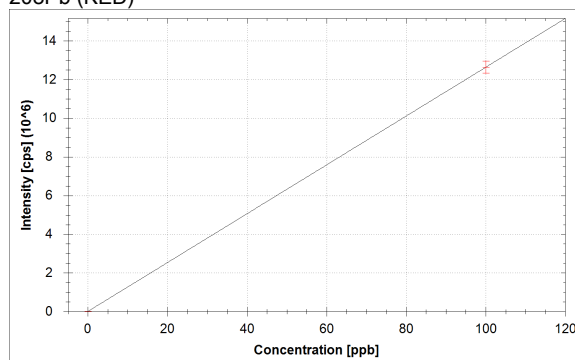

$$f(x) = 126278.3173 \cdot x + 7036.6033$$

$$R^2 = 1.0000$$

$$\text{BEC} = 0.056 \text{ ppb}$$

$$\text{LoD} = 0.0520 \text{ ppb}$$

232Th (KED)

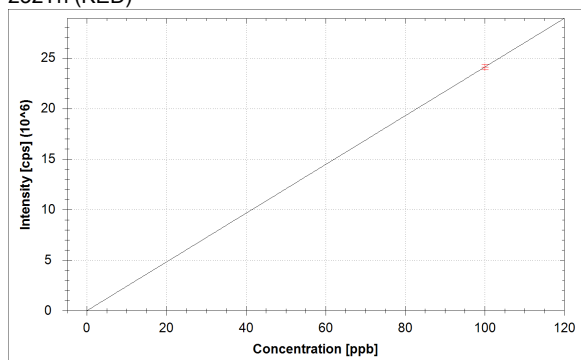

$$f(x) = 240987.5611 \cdot x + 433.3416$$

$$R^2 = 1.0000$$

$$\text{BEC} = 0.002 \text{ ppb}$$

$$\text{LoD} = 0.0011 \text{ ppb}$$

238U (KED)

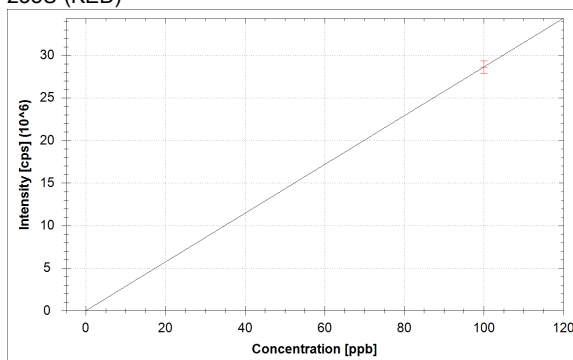

$$f(x) = 286119.6661 \cdot x + 108.8896$$

$$R^2 = 1.0000$$

$$\text{BEC} = 0.000 \text{ ppb}$$

$$\text{LoD} = 0.0002 \text{ ppb}$$

**Standards:**

Analysis Index: 3  
 Analysis Name: std1  
 Analysis Type: STD  
 Analysis Started at: 8/30/2021 4:21:30 PM  
 Standard (Stock): std1  
 Standard DF: 1

| Category    | Concentration average | Concentration RSD | Standard Concentration |
|-------------|-----------------------|-------------------|------------------------|
| 9Be (KED)   | 100.000 ppb           | 1.6 %             | 100.000 ppb            |
| 11B (KED)   | 100.000 ppb           | 1.6 %             | 100.000 ppb            |
| 24Mg (KED)  | 100.000 ppb           | 1.7 %             | 100.000 ppb            |
| 27Al (KED)  | 100.000 ppb           | 2.5 %             | 100.000 ppb            |
| 51V (KED)   | 100.000 ppb           | 0.5 %             | 100.000 ppb            |
| 52Cr (KED)  | 100.000 ppb           | 0.5 %             | 100.000 ppb            |
| 55Mn (KED)  | 100.000 ppb           | 1.8 %             | 100.000 ppb            |
| 56Fe (KED)  | 100.000 ppb           | 1.8 %             | 100.000 ppb            |
| 58Ni (KED)  | 100.000 ppb           | 0.5 %             | 100.000 ppb            |
| 59Co (KED)  | 100.000 ppb           | 1.5 %             | 100.000 ppb            |
| 63Cu (KED)  | 100.000 ppb           | 1.9 %             | 100.000 ppb            |
| 64Zn (KED)  | 100.000 ppb           | 0.9 %             | 100.000 ppb            |
| 69Ga (KED)  | 100.000 ppb           | 1.0 %             | 100.000 ppb            |
| 75As (KED)  | 100.000 ppb           | 1.2 %             | 100.000 ppb            |
| 80Se (KED)  | 100.000 ppb           | 0.7 %             | 100.000 ppb            |
| 85Rb (KED)  | 100.000 ppb           | 1.4 %             | 100.000 ppb            |
| 88Sr (KED)  | 100.000 ppb           | 1.3 %             | 100.000 ppb            |
| 107Ag (KED) | 100.000 ppb           | 0.8 %             | 100.000 ppb            |
| 114Cd (KED) | 100.000 ppb           | 0.4 %             | 100.000 ppb            |
| 133Cs (KED) | 100.000 ppb           | 0.4 %             | 100.000 ppb            |
| 138Ba (KED) | 100.000 ppb           | 0.6 %             | 100.000 ppb            |
| 139La (KED) | 100.000 ppb           | 0.1 %             | 100.000 ppb            |
| 140Ce (KED) | 100.000 ppb           | 0.2 %             | 100.000 ppb            |
| 141Pr (KED) | 100.000 ppb           | 2.4 %             | 100.000 ppb            |
| 142Nd (KED) | 100.000 ppb           | 1.1 %             | 100.000 ppb            |
| 152Sm (KED) | 100.000 ppb           | 2.2 %             | 100.000 ppb            |
| 153Eu (KED) | 100.000 ppb           | 3.3 %             | 100.000 ppb            |
| 158Gd (KED) | 100.000 ppb           | 2.4 %             | 100.000 ppb            |
| 164Dy (KED) | 100.000 ppb           | 2.8 %             | 100.000 ppb            |
| 165Ho (KED) | 100.000 ppb           | 0.6 %             | 100.000 ppb            |
| 166Er (KED) | 100.000 ppb           | 1.4 %             | 100.000 ppb            |
| 169Tm (KED) | 100.000 ppb           | 1.1 %             | 100.000 ppb            |
| 174Yb (KED) | 100.000 ppb           | 2.9 %             | 100.000 ppb            |
| 175Lu (KED) | 100.000 ppb           | 1.8 %             | 100.000 ppb            |
| 205Tl (KED) | 100.000 ppb           | 1.7 %             | 100.000 ppb            |
| 208Pb (KED) | 100.000 ppb           | 2.5 %             | 100.000 ppb            |
| 232Th (KED) | 100.000 ppb           | 1.1 %             | 100.000 ppb            |
| 238U (KED)  | 100.000 ppb           | 2.5 %             | 100.000 ppb            |

## Sample List Summary:

Instrument ID: iCAP Q

| Index: | Label:      | Main<br>Runs: | Survey<br>Runs: | Start Time:          | User name:                    |
|--------|-------------|---------------|-----------------|----------------------|-------------------------------|
| 1      | water       | 3             | 0               | 8/30/2021 4:15:26 PM | WINDOWS-UPCI4ER\Administrator |
| 2      | blk         | 3             | 0               | 8/30/2021 4:18:23 PM | WINDOWS-UPCI4ER\Administrator |
| 3      | std1        | 3             | 0               | 8/30/2021 4:21:30 PM | WINDOWS-UPCI4ER\Administrator |
| 4      | 1701502jian | 3             | 0               | 8/30/2021 4:25:08 PM | WINDOWS-UPCI4ER\Administrator |
| 5      | 18006jian   | 3             | 0               | 8/30/2021 4:28:40 PM | WINDOWS-UPCI4ER\Administrator |
| 6      | 1701637jian | 3             | 0               | 8/30/2021 4:31:55 PM | WINDOWS-UPCI4ER\Administrator |
| 7      | 17004jian   | 3             | 0               | 8/30/2021 4:35:24 PM | WINDOWS-UPCI4ER\Administrator |
| 8      | 1702003jian | 3             | 0               | 8/30/2021 4:38:51 PM | WINDOWS-UPCI4ER\Administrator |
| 9      | 1701508jian | 3             | 0               | 8/30/2021 4:42:04 PM | WINDOWS-UPCI4ER\Administrator |
| 10     | 18096jian   | 3             | 0               | 8/30/2021 4:45:23 PM | WINDOWS-UPCI4ER\Administrator |
| 11     | 18003jian   | 3             | 0               | 8/30/2021 4:48:50 PM | WINDOWS-UPCI4ER\Administrator |
| 12     | 18001jian   | 3             | 0               | 8/30/2021 4:52:14 PM | WINDOWS-UPCI4ER\Administrator |
| 13     | 268jian     | 3             | 0               | 8/30/2021 4:55:16 PM | WINDOWS-UPCI4ER\Administrator |
| 14     | 17174jian   | 3             | 0               | 8/30/2021 4:58:28 PM | WINDOWS-UPCI4ER\Administrator |
| 15     | 17148jian   | 3             | 0               | 8/30/2021 5:01:39 PM | WINDOWS-UPCI4ER\Administrator |
| 16     | 18094jian   | 3             | 0               | 8/30/2021 5:04:48 PM | WINDOWS-UPCI4ER\Administrator |
| 17     | 17180jian   | 3             | 0               | 8/30/2021 5:07:53 PM | WINDOWS-UPCI4ER\Administrator |
| 18     | 17186jian   | 3             | 0               | 8/30/2021 5:11:33 PM | WINDOWS-UPCI4ER\Administrator |
| 19     | 17210jian   | 3             | 0               | 8/30/2021 5:14:51 PM | WINDOWS-UPCI4ER\Administrator |
| 20     | 17013jian   | 3             | 0               | 8/30/2021 5:18:00 PM | WINDOWS-UPCI4ER\Administrator |
| 21     | 17011jian   | 3             | 0               | 8/30/2021 5:21:26 PM | WINDOWS-UPCI4ER\Administrator |
| 22     | 18120jian   | 3             | 0               | 8/30/2021 5:24:33 PM | WINDOWS-UPCI4ER\Administrator |
| 23     | 18060jian   | 3             | 0               | 8/30/2021 5:27:39 PM | WINDOWS-UPCI4ER\Administrator |

## Sample Summary

Instrument ID: iCAP Q

Analysis index: 1

Analysis name: water

Analysis started at: 8/30/2021 4:15:26 PM

User name: WINDOWS-UPCI4ER\Administrator

| Category    | Concentration average | Concentration RSD |
|-------------|-----------------------|-------------------|
| 9Be (KED)   | -0.010 ppb            | 0.0 %             |
| 11B (KED)   | -0.905 ppb            | 0.0 %             |
| 24Mg (KED)  | -0.414 ppb            | 9.8 %             |
| 27Al (KED)  | -1.023 ppb            | 14.3 %            |
| 51V (KED)   | -0.001 ppb            | 43.3 %            |
| 52Cr (KED)  | -0.020 ppb            | 5.2 %             |
| 55Mn (KED)  | -0.161 ppb            | 2.5 %             |
| 56Fe (KED)  | -0.789 ppb            | 0.6 %             |
| 58Ni (KED)  | -0.069 ppb            | 3.9 %             |
| 59Co (KED)  | -0.001 ppb            | 34.6 %            |
| 63Cu (KED)  | -0.082 ppb            | 1.3 %             |
| 64Zn (KED)  | -0.155 ppb            | 7.1 %             |
| 69Ga (KED)  | -0.028 ppb            | 5.4 %             |
| 75As (KED)  | -0.094 ppb            | 6.7 %             |
| 80Se (KED)  | 0.066 ppb             | 249.6 %           |
| 85Rb (KED)  | -0.006 ppb            | 26.0 %            |
| 88Sr (KED)  | -0.011 ppb            | 11.6 %            |
| 107Ag (KED) | -0.016 ppb            | 0.3 %             |
| 114Cd (KED) | -0.009 ppb            | 0.0 %             |
| 133Cs (KED) | -0.005 ppb            | 0.0 %             |
| 138Ba (KED) | -0.118 ppb            | 0.6 %             |
| 139La (KED) | 0.000 ppb             | 0.0 %             |
| 140Ce (KED) | -0.003 ppb            | 1.6 %             |
| 141Pr (KED) | 0.000 ppb             | 0.0 %             |
| 142Nd (KED) | -0.001 ppb            | 3.3 %             |
| 152Sm (KED) | 0.000 ppb             | 34.6 %            |
| 153Eu (KED) | 0.000 ppb             | 0.0 %             |
| 158Gd (KED) | 0.000 ppb             | 86.6 %            |
| 164Dy (KED) | 0.000 ppb             | 0.0 %             |
| 165Ho (KED) | 0.000 ppb             | 0.0 %             |
| 166Er (KED) | -0.001 ppb            | 0.0 %             |
| 169Tm (KED) | 0.000 ppb             |                   |
| 174Yb (KED) | 0.000 ppb             | 0.0 %             |
| 175Lu (KED) | 0.000 ppb             | 0.0 %             |
| 205Tl (KED) | 0.000 ppb             | 964.4 %           |
| 208Pb (KED) | -0.055 ppb            | 0.3 %             |
| 232Th (KED) | -0.002 ppb            | 0.0 %             |
| 238U (KED)  | 0.000 ppb             | 1.8 %             |

| Category   | Concentration average | Intensity average | Intensity RSD |
|------------|-----------------------|-------------------|---------------|
| 9Be (KED)  | -0.010 ppb            | 0 cps             |               |
| 11B (KED)  | -0.905 ppb            | 0 cps             |               |
| 24Mg (KED) | -0.414 ppb            | 36 cps            | 44.3 %        |
| 27Al (KED) | -1.023 ppb            | 8 cps             | 173.2 %       |
| 51V (KED)  | -0.001 ppb            | 2 cps             | 173.2 %       |
| 52Cr (KED) | -0.020 ppb            | 46 cps            | 22.4 %        |
| 55Mn (KED) | -0.161 ppb            | 96 cps            | 19.2 %        |
| 56Fe (KED) | -0.789 ppb            | 273 cps           | 15.9 %        |
| 58Ni (KED) | -0.069 ppb            | 1,452 cps         | 2.2 %         |
| 59Co (KED) | -0.001 ppb            | 2 cps             | 173.2 %       |

| Category    | Concentration average | Intensity average | Intensity RSD |
|-------------|-----------------------|-------------------|---------------|
| 63Cu (KED)  | -0.082 ppb            | 162 cps           | 9.5 %         |
| 64Zn (KED)  | -0.155 ppb            | 417 cps           | 9.7 %         |
| 69Ga (KED)  | -0.028 ppb            | 9 cps             | 78.1 %        |
| 75As (KED)  | -0.094 ppb            | 10 cps            | 66.7 %        |
| 80Se (KED)  | 0.066 ppb             | 646 cps           | 7.7 %         |
| 85Rb (KED)  | -0.006 ppb            | 8 cps             | 89.2 %        |
| 88Sr (KED)  | -0.011 ppb            | 19 cps            | 36.7 %        |
| 107Ag (KED) | -0.016 ppb            | 1 cps             | 173.2 %       |
| 114Cd (KED) | -0.009 ppb            | 7 cps             | 0.0 %         |
| 133Cs (KED) | -0.005 ppb            | 7 cps             | 0.0 %         |
| 138Ba (KED) | -0.118 ppb            | 263 cps           | 8.9 %         |
| 139La (KED) | 0.000 ppb             | 0 cps             |               |
| 140Ce (KED) | -0.003 ppb            | 2 cps             | 173.2 %       |
| 141Pr (KED) | 0.000 ppb             | 0 cps             |               |
| 142Nd (KED) | -0.001 ppb            | 2 cps             | 86.6 %        |
| 152Sm (KED) | 0.000 ppb             | 1 cps             | 173.2 %       |
| 153Eu (KED) | 0.000 ppb             | 0 cps             |               |
| 158Gd (KED) | 0.000 ppb             | 1 cps             | 173.2 %       |
| 164Dy (KED) | 0.000 ppb             | 0 cps             |               |
| 165Ho (KED) | 0.000 ppb             | 0 cps             |               |
| 166Er (KED) | -0.001 ppb            | 0 cps             |               |
| 169Tm (KED) | 0.000 ppb             | 0 cps             |               |
| 174Yb (KED) | 0.000 ppb             | 0 cps             |               |
| 175Lu (KED) | 0.000 ppb             | 0 cps             |               |
| 205Tl (KED) | 0.000 ppb             | 11 cps            | 96.4 %        |
| 208Pb (KED) | -0.055 ppb            | 138 cps           | 14.2 %        |
| 232Th (KED) | -0.002 ppb            | 0 cps             |               |
| 238U (KED)  | 0.000 ppb             | 1 cps             | 173.2 %       |

## Sample Summary

Instrument ID: iCAP Q

Analysis index: 2

Analysis name: blk

Analysis started at: 8/30/2021 4:18:23 PM

User name: WINDOWS-UPCI4ER\Administrator

| Category    | Concentration average | Concentration RSD |
|-------------|-----------------------|-------------------|
| 9Be (KED)   | 0.000 ppb             | 173.2 %           |
| 11B (KED)   | 0.000 ppb             | 6.3 %             |
| 24Mg (KED)  | 0.000 ppb             | 12.1 %            |
| 27Al (KED)  | 0.000 ppb             | 30.3 %            |
| 51V (KED)   | 0.000 ppb             | 69.3 %            |
| 52Cr (KED)  | 0.000 ppb             | 21.8 %            |
| 55Mn (KED)  | 0.000 ppb             | 6.9 %             |
| 56Fe (KED)  | 0.000 ppb             | 4.2 %             |
| 58Ni (KED)  | 0.000 ppb             | 4.3 %             |
| 59Co (KED)  | 0.000 ppb             | 25.0 %            |
| 63Cu (KED)  | 0.000 ppb             | 13.2 %            |
| 64Zn (KED)  | 0.000 ppb             | 4.9 %             |
| 69Ga (KED)  | 0.000 ppb             | 36.6 %            |
| 75As (KED)  | 0.000 ppb             | 0.0 %             |
| 80Se (KED)  | 0.000 ppb             | 3.9 %             |
| 85Rb (KED)  | 0.000 ppb             | 11.2 %            |
| 88Sr (KED)  | 0.000 ppb             | 10.6 %            |
| 107Ag (KED) | 0.000 ppb             | 1.9 %             |
| 114Cd (KED) | 0.000 ppb             | 8.5 %             |
| 133Cs (KED) | 0.000 ppb             | 17.1 %            |
| 138Ba (KED) | 0.000 ppb             | 1.8 %             |
| 139La (KED) | 0.000 ppb             | 39.7 %            |
| 140Ce (KED) | 0.000 ppb             | 6.8 %             |
| 141Pr (KED) | 0.000 ppb             | 16.7 %            |
| 142Nd (KED) | 0.000 ppb             | 12.6 %            |
| 152Sm (KED) | 0.000 ppb             | 0.0 %             |
| 153Eu (KED) | 0.000 ppb             | 114.6 %           |
| 158Gd (KED) | 0.000 ppb             | 0.0 %             |
| 164Dy (KED) | 0.000 ppb             | 21.7 %            |
| 165Ho (KED) | 0.000 ppb             | 43.3 %            |
| 166Er (KED) | 0.000 ppb             | 21.2 %            |
| 169Tm (KED) | 0.000 ppb             |                   |
| 174Yb (KED) | 0.000 ppb             | 173.2 %           |
| 175Lu (KED) | 0.000 ppb             | 173.2 %           |
| 205Tl (KED) | 0.000 ppb             | 15.7 %            |
| 208Pb (KED) | 0.000 ppb             | 31.1 %            |
| 232Th (KED) | 0.000 ppb             | 20.2 %            |
| 238U (KED)  | 0.000 ppb             | 20.4 %            |

| Category   | Concentration average | Intensity average | Intensity RSD |
|------------|-----------------------|-------------------|---------------|
| 9Be (KED)  | 0.000 ppb             | 1 cps             | 173.2 %       |
| 11B (KED)  | 0.000 ppb             | 53 cps            | 6.3 %         |
| 24Mg (KED) | 0.000 ppb             | 196 cps           | 12.1 %        |
| 27Al (KED) | 0.000 ppb             | 102 cps           | 30.3 %        |
| 51V (KED)  | 0.000 ppb             | 11 cps            | 69.3 %        |
| 52Cr (KED) | 0.000 ppb             | 240 cps           | 21.8 %        |
| 55Mn (KED) | 0.000 ppb             | 823 cps           | 6.9 %         |
| 56Fe (KED) | 0.000 ppb             | 7,163 cps         | 4.2 %         |
| 58Ni (KED) | 0.000 ppb             | 2,275 cps         | 4.3 %         |
| 59Co (KED) | 0.000 ppb             | 13 cps            | 25.0 %        |

| Category    | Concentration average | Intensity average | Intensity RSD |
|-------------|-----------------------|-------------------|---------------|
| 63Cu (KED)  | 0.000 ppb             | 1,393 cps         | 13.2 %        |
| 64Zn (KED)  | 0.000 ppb             | 987 cps           | 4.9 %         |
| 69Ga (KED)  | 0.000 ppb             | 137 cps           | 36.6 %        |
| 75As (KED)  | 0.000 ppb             | 110 cps           | 0.0 %         |
| 80Se (KED)  | 0.000 ppb             | 626 cps           | 3.9 %         |
| 85Rb (KED)  | 0.000 ppb             | 34 cps            | 11.2 %        |
| 88Sr (KED)  | 0.000 ppb             | 79 cps            | 10.6 %        |
| 107Ag (KED) | 0.000 ppb             | 719 cps           | 1.9 %         |
| 114Cd (KED) | 0.000 ppb             | 158 cps           | 8.5 %         |
| 133Cs (KED) | 0.000 ppb             | 114 cps           | 17.1 %        |
| 138Ba (KED) | 0.000 ppb             | 4,107 cps         | 1.8 %         |
| 139La (KED) | 0.000 ppb             | 21 cps            | 39.7 %        |
| 140Ce (KED) | 0.000 ppb             | 241 cps           | 6.8 %         |
| 141Pr (KED) | 0.000 ppb             | 20 cps            | 16.7 %        |
| 142Nd (KED) | 0.000 ppb             | 61 cps            | 12.6 %        |
| 152Sm (KED) | 0.000 ppb             | 7 cps             | 0.0 %         |
| 153Eu (KED) | 0.000 ppb             | 4 cps             | 114.6 %       |
| 158Gd (KED) | 0.000 ppb             | 3 cps             | 0.0 %         |
| 164Dy (KED) | 0.000 ppb             | 9 cps             | 21.7 %        |
| 165Ho (KED) | 0.000 ppb             | 4 cps             | 43.3 %        |
| 166Er (KED) | 0.000 ppb             | 57 cps            | 21.2 %        |
| 169Tm (KED) | 0.000 ppb             | 0 cps             |               |
| 174Yb (KED) | 0.000 ppb             | 1 cps             | 173.2 %       |
| 175Lu (KED) | 0.000 ppb             | 1 cps             | 173.2 %       |
| 205Tl (KED) | 0.000 ppb             | 12 cps            | 15.7 %        |
| 208Pb (KED) | 0.000 ppb             | 7,037 cps         | 31.1 %        |
| 232Th (KED) | 0.000 ppb             | 433 cps           | 20.2 %        |
| 238U (KED)  | 0.000 ppb             | 109 cps           | 20.4 %        |

## Sample Summary

Instrument ID: iCAP Q

Analysis index: 3

Analysis name: std1

Analysis started at: 8/30/2021 4:21:30 PM

User name: WINDOWS-UPCI4ER\Administrator

| Category    | Concentration average | Concentration RSD |
|-------------|-----------------------|-------------------|
| 9Be (KED)   | 100.000 ppb           | 1.6 %             |
| 11B (KED)   | 100.000 ppb           | 1.6 %             |
| 24Mg (KED)  | 100.000 ppb           | 1.7 %             |
| 27Al (KED)  | 100.000 ppb           | 2.5 %             |
| 51V (KED)   | 100.000 ppb           | 0.5 %             |
| 52Cr (KED)  | 100.000 ppb           | 0.5 %             |
| 55Mn (KED)  | 100.000 ppb           | 1.8 %             |
| 56Fe (KED)  | 100.000 ppb           | 1.8 %             |
| 58Ni (KED)  | 100.000 ppb           | 0.5 %             |
| 59Co (KED)  | 100.000 ppb           | 1.5 %             |
| 63Cu (KED)  | 100.000 ppb           | 1.9 %             |
| 64Zn (KED)  | 100.000 ppb           | 0.9 %             |
| 69Ga (KED)  | 100.000 ppb           | 1.0 %             |
| 75As (KED)  | 100.000 ppb           | 1.2 %             |
| 80Se (KED)  | 100.000 ppb           | 0.7 %             |
| 85Rb (KED)  | 100.000 ppb           | 1.4 %             |
| 88Sr (KED)  | 100.000 ppb           | 1.3 %             |
| 107Ag (KED) | 100.000 ppb           | 0.8 %             |
| 114Cd (KED) | 100.000 ppb           | 0.4 %             |
| 133Cs (KED) | 100.000 ppb           | 0.4 %             |
| 138Ba (KED) | 100.000 ppb           | 0.6 %             |
| 139La (KED) | 100.000 ppb           | 0.1 %             |
| 140Ce (KED) | 100.000 ppb           | 0.2 %             |
| 141Pr (KED) | 100.000 ppb           | 2.4 %             |
| 142Nd (KED) | 100.000 ppb           | 1.1 %             |
| 152Sm (KED) | 100.000 ppb           | 2.2 %             |
| 153Eu (KED) | 100.000 ppb           | 3.3 %             |
| 158Gd (KED) | 100.000 ppb           | 2.4 %             |
| 164Dy (KED) | 100.000 ppb           | 2.8 %             |
| 165Ho (KED) | 100.000 ppb           | 0.6 %             |
| 166Er (KED) | 100.000 ppb           | 1.4 %             |
| 169Tm (KED) | 100.000 ppb           | 1.1 %             |
| 174Yb (KED) | 100.000 ppb           | 2.9 %             |
| 175Lu (KED) | 100.000 ppb           | 1.8 %             |
| 205Tl (KED) | 100.000 ppb           | 1.7 %             |
| 208Pb (KED) | 100.000 ppb           | 2.5 %             |
| 232Th (KED) | 100.000 ppb           | 1.1 %             |
| 238U (KED)  | 100.000 ppb           | 2.5 %             |

| Category   | Concentration average | Intensity average | Intensity RSD |
|------------|-----------------------|-------------------|---------------|
| 9Be (KED)  | 100.000 ppb           | 10,673 cps        | 1.6 %         |
| 11B (KED)  | 100.000 ppb           | 5,945 cps         | 1.6 %         |
| 24Mg (KED) | 100.000 ppb           | 38,831 cps        | 1.7 %         |
| 27Al (KED) | 100.000 ppb           | 9,331 cps         | 2.4 %         |
| 51V (KED)  | 100.000 ppb           | 616,419 cps       | 0.5 %         |
| 52Cr (KED) | 100.000 ppb           | 970,282 cps       | 0.5 %         |
| 55Mn (KED) | 100.000 ppb           | 453,126 cps       | 1.8 %         |
| 56Fe (KED) | 100.000 ppb           | 880,747 cps       | 1.7 %         |
| 58Ni (KED) | 100.000 ppb           | 1,198,631 cps     | 0.5 %         |
| 59Co (KED) | 100.000 ppb           | 1,950,347 cps     | 1.5 %         |

| Category    | Concentration average | Intensity average | Intensity RSD |
|-------------|-----------------------|-------------------|---------------|
| 63Cu (KED)  | 100.000 ppb           | 1,494,122 cps     | 1.9 %         |
| 64Zn (KED)  | 100.000 ppb           | 369,235 cps       | 0.9 %         |
| 69Ga (KED)  | 100.000 ppb           | 450,210 cps       | 1.0 %         |
| 75As (KED)  | 100.000 ppb           | 106,233 cps       | 1.2 %         |
| 80Se (KED)  | 100.000 ppb           | 30,885 cps        | 0.7 %         |
| 85Rb (KED)  | 100.000 ppb           | 411,456 cps       | 1.4 %         |
| 88Sr (KED)  | 100.000 ppb           | 570,515 cps       | 1.3 %         |
| 107Ag (KED) | 100.000 ppb           | 4,380,306 cps     | 0.8 %         |
| 114Cd (KED) | 100.000 ppb           | 1,610,604 cps     | 0.4 %         |
| 133Cs (KED) | 100.000 ppb           | 2,257,523 cps     | 0.4 %         |
| 138Ba (KED) | 100.000 ppb           | 3,274,703 cps     | 0.6 %         |
| 139La (KED) | 100.000 ppb           | 6,683,204 cps     | 0.1 %         |
| 140Ce (KED) | 100.000 ppb           | 9,148,411 cps     | 0.2 %         |
| 141Pr (KED) | 100.000 ppb           | 9,364,291 cps     | 2.4 %         |
| 142Nd (KED) | 100.000 ppb           | 3,989,814 cps     | 1.1 %         |
| 152Sm (KED) | 100.000 ppb           | 3,883,474 cps     | 2.2 %         |
| 153Eu (KED) | 100.000 ppb           | 7,148,852 cps     | 3.3 %         |
| 158Gd (KED) | 100.000 ppb           | 5,312,914 cps     | 2.4 %         |
| 164Dy (KED) | 100.000 ppb           | 5,725,094 cps     | 2.8 %         |
| 165Ho (KED) | 100.000 ppb           | 19,985,611 cps    | 0.6 %         |
| 166Er (KED) | 100.000 ppb           | 7,123,019 cps     | 1.4 %         |
| 169Tm (KED) | 100.000 ppb           | 23,777,706 cps    | 1.1 %         |
| 174Yb (KED) | 100.000 ppb           | 8,667,397 cps     | 2.9 %         |
| 175Lu (KED) | 100.000 ppb           | 12,679,153 cps    | 1.8 %         |
| 205Tl (KED) | 100.000 ppb           | 18,053,058 cps    | 1.7 %         |
| 208Pb (KED) | 100.000 ppb           | 12,634,868 cps    | 2.5 %         |
| 232Th (KED) | 100.000 ppb           | 24,099,189 cps    | 1.1 %         |
| 238U (KED)  | 100.000 ppb           | 28,612,076 cps    | 2.5 %         |

## Sample Summary

Instrument ID: iCAP Q

Analysis index: 4

Analysis name: 1701502jian

Analysis started at: 8/30/2021 4:25:08 PM

User name: WINDOWS-UPCI4ER\Administrator

| Category    | Concentration average | Concentration RSD |
|-------------|-----------------------|-------------------|
| 9Be (KED)   | 0.031 ppb             | 152.8 %           |
| 11B (KED)   | 2.716 ppb             | 15.0 %            |
| 24Mg (KED)  | 485.790 ppb           | 4.4 %             |
| 27Al (KED)  | 447.244 ppb           | 5.1 %             |
| 51V (KED)   | 0.877 ppb             | 4.0 %             |
| 52Cr (KED)  | 5.207 ppb             | 3.5 %             |
| 55Mn (KED)  | 19.521 ppb            | 2.6 %             |
| 56Fe (KED)  | 435.686 ppb           | 3.5 %             |
| 58Ni (KED)  | 3.092 ppb             | 3.6 %             |
| 59Co (KED)  | 0.261 ppb             | 2.0 %             |
| 63Cu (KED)  | 14.576 ppb            | 3.4 %             |
| 64Zn (KED)  | 185.920 ppb           | 2.1 %             |
| 69Ga (KED)  | 2.526 ppb             | 6.6 %             |
| 75As (KED)  | 0.454 ppb             | 6.2 %             |
| 80Se (KED)  | 3.338 ppb             | 15.4 %            |
| 85Rb (KED)  | 2.534 ppb             | 2.6 %             |
| 88Sr (KED)  | 6.906 ppb             | 2.7 %             |
| 107Ag (KED) | 0.133 ppb             | 2.8 %             |
| 114Cd (KED) | 0.604 ppb             | 1.6 %             |
| 133Cs (KED) | 0.083 ppb             | 7.3 %             |
| 138Ba (KED) | 9.660 ppb             | 1.3 %             |
| 139La (KED) | 0.448 ppb             | 1.3 %             |
| 140Ce (KED) | 0.893 ppb             | 1.3 %             |
| 141Pr (KED) | 0.111 ppb             | 2.8 %             |
| 142Nd (KED) | 0.551 ppb             | 1.9 %             |
| 152Sm (KED) | 0.081 ppb             | 11.2 %            |
| 153Eu (KED) | 0.020 ppb             | 7.5 %             |
| 158Gd (KED) | 0.074 ppb             | 3.9 %             |
| 164Dy (KED) | 0.053 ppb             | 3.0 %             |
| 165Ho (KED) | 0.011 ppb             | 4.0 %             |
| 166Er (KED) | 0.027 ppb             | 9.2 %             |
| 169Tm (KED) | 0.004 ppb             | 13.0 %            |
| 174Yb (KED) | 0.022 ppb             | 3.9 %             |
| 175Lu (KED) | 0.005 ppb             | 10.0 %            |
| 205Tl (KED) | 0.016 ppb             | 11.2 %            |
| 208Pb (KED) | 2.167 ppb             | 2.0 %             |
| 232Th (KED) | 0.232 ppb             | 13.4 %            |
| 238U (KED)  | 0.040 ppb             | 6.0 %             |

| Category   | Concentration average | Intensity average | Intensity RSD |
|------------|-----------------------|-------------------|---------------|
| 9Be (KED)  | 0.031 ppb             | 4 cps             | 114.6 %       |
| 11B (KED)  | 2.716 ppb             | 213 cps           | 11.3 %        |
| 24Mg (KED) | 485.790 ppb           | 187,885 cps       | 4.4 %         |
| 27Al (KED) | 447.244 ppb           | 41,379 cps        | 5.1 %         |
| 51V (KED)  | 0.877 ppb             | 5,415 cps         | 4.0 %         |
| 52Cr (KED) | 5.207 ppb             | 50,752 cps        | 3.5 %         |
| 55Mn (KED) | 19.521 ppb            | 89,119 cps        | 2.6 %         |
| 56Fe (KED) | 435.686 ppb           | 3,813,248 cps     | 3.5 %         |
| 58Ni (KED) | 3.092 ppb             | 39,265 cps        | 3.4 %         |
| 59Co (KED) | 0.261 ppb             | 5,100 cps         | 2.0 %         |

| Category    | Concentration average | Intensity average | Intensity RSD |
|-------------|-----------------------|-------------------|---------------|
| 63Cu (KED)  | 14.576 ppb            | 218,969 cps       | 3.4 %         |
| 64Zn (KED)  | 185.920 ppb           | 685,633 cps       | 2.1 %         |
| 69Ga (KED)  | 2.526 ppb             | 11,508 cps        | 6.5 %         |
| 75As (KED)  | 0.454 ppb             | 592 cps           | 5.0 %         |
| 80Se (KED)  | 3.338 ppb             | 1,636 cps         | 9.5 %         |
| 85Rb (KED)  | 2.534 ppb             | 10,461 cps        | 2.6 %         |
| 88Sr (KED)  | 6.906 ppb             | 39,471 cps        | 2.6 %         |
| 107Ag (KED) | 0.133 ppb             | 6,548 cps         | 2.5 %         |
| 114Cd (KED) | 0.604 ppb             | 9,884 cps         | 1.6 %         |
| 133Cs (KED) | 0.083 ppb             | 1,991 cps         | 6.8 %         |
| 138Ba (KED) | 9.660 ppb             | 320,049 cps       | 1.3 %         |
| 139La (KED) | 0.448 ppb             | 29,970 cps        | 1.3 %         |
| 140Ce (KED) | 0.893 ppb             | 81,926 cps        | 1.3 %         |
| 141Pr (KED) | 0.111 ppb             | 10,433 cps        | 2.8 %         |
| 142Nd (KED) | 0.551 ppb             | 22,059 cps        | 1.9 %         |
| 152Sm (KED) | 0.081 ppb             | 3,145 cps         | 11.1 %        |
| 153Eu (KED) | 0.020 ppb             | 1,399 cps         | 7.5 %         |
| 158Gd (KED) | 0.074 ppb             | 3,918 cps         | 3.9 %         |
| 164Dy (KED) | 0.053 ppb             | 3,053 cps         | 3.0 %         |
| 165Ho (KED) | 0.011 ppb             | 2,227 cps         | 4.0 %         |
| 166Er (KED) | 0.027 ppb             | 1,947 cps         | 8.9 %         |
| 169Tm (KED) | 0.004 ppb             | 1,064 cps         | 13.0 %        |
| 174Yb (KED) | 0.022 ppb             | 1,951 cps         | 3.9 %         |
| 175Lu (KED) | 0.005 ppb             | 591 cps           | 10.0 %        |
| 205Tl (KED) | 0.016 ppb             | 2,894 cps         | 11.2 %        |
| 208Pb (KED) | 2.167 ppb             | 280,648 cps       | 1.9 %         |
| 232Th (KED) | 0.232 ppb             | 56,325 cps        | 13.3 %        |
| 238U (KED)  | 0.040 ppb             | 11,692 cps        | 5.9 %         |

## Sample Summary

Instrument ID: iCAP Q

Analysis index: 5

Analysis name: 18006jian

Analysis started at: 8/30/2021 4:28:40 PM

User name: WINDOWS-UPCI4ER\Administrator

| Category    | Concentration average | Concentration RSD |
|-------------|-----------------------|-------------------|
| 9Be (KED)   | 0.021 ppb             | 150.0 %           |
| 11B (KED)   | 9.883 ppb             | 4.6 %             |
| 24Mg (KED)  | 731.359 ppb           | 3.6 %             |
| 27Al (KED)  | 556.145 ppb           | 3.0 %             |
| 51V (KED)   | 1.125 ppb             | 1.1 %             |
| 52Cr (KED)  | 5.720 ppb             | 0.9 %             |
| 55Mn (KED)  | 19.267 ppb            | 3.3 %             |
| 56Fe (KED)  | 440.274 ppb           | 2.2 %             |
| 58Ni (KED)  | 2.979 ppb             | 1.5 %             |
| 59Co (KED)  | 0.284 ppb             | 4.1 %             |
| 63Cu (KED)  | 10.894 ppb            | 2.4 %             |
| 64Zn (KED)  | 176.656 ppb           | 1.2 %             |
| 69Ga (KED)  | 2.705 ppb             | 4.1 %             |
| 75As (KED)  | 0.496 ppb             | 8.8 %             |
| 80Se (KED)  | 3.716 ppb             | 9.8 %             |
| 85Rb (KED)  | 2.834 ppb             | 2.3 %             |
| 88Sr (KED)  | 7.945 ppb             | 1.9 %             |
| 107Ag (KED) | 0.091 ppb             | 2.2 %             |
| 114Cd (KED) | 0.510 ppb             | 2.2 %             |
| 133Cs (KED) | 0.084 ppb             | 2.0 %             |
| 138Ba (KED) | 8.599 ppb             | 2.0 %             |
| 139La (KED) | 0.438 ppb             | 1.8 %             |
| 140Ce (KED) | 0.863 ppb             | 0.6 %             |
| 141Pr (KED) | 0.099 ppb             | 3.0 %             |
| 142Nd (KED) | 0.523 ppb             | 4.1 %             |
| 152Sm (KED) | 0.070 ppb             | 3.6 %             |
| 153Eu (KED) | 0.016 ppb             | 8.9 %             |
| 158Gd (KED) | 0.065 ppb             | 1.8 %             |
| 164Dy (KED) | 0.046 ppb             | 1.0 %             |
| 165Ho (KED) | 0.009 ppb             | 5.7 %             |
| 166Er (KED) | 0.026 ppb             | 5.3 %             |
| 169Tm (KED) | 0.003 ppb             | 7.3 %             |
| 174Yb (KED) | 0.019 ppb             | 0.8 %             |
| 175Lu (KED) | 0.003 ppb             | 7.2 %             |
| 205Tl (KED) | 0.010 ppb             | 10.1 %            |
| 208Pb (KED) | 1.175 ppb             | 2.8 %             |
| 232Th (KED) | 0.132 ppb             | 2.5 %             |
| 238U (KED)  | 0.032 ppb             | 21.7 %            |

| Category   | Concentration average | Intensity average | Intensity RSD |
|------------|-----------------------|-------------------|---------------|
| 9Be (KED)  | 0.021 ppb             | 3 cps             | 100.0 %       |
| 11B (KED)  | 9.883 ppb             | 636 cps           | 4.2 %         |
| 24Mg (KED) | 731.359 ppb           | 282,762 cps       | 3.6 %         |
| 27Al (KED) | 556.145 ppb           | 51,429 cps        | 3.0 %         |
| 51V (KED)  | 1.125 ppb             | 6,944 cps         | 1.1 %         |
| 52Cr (KED) | 5.720 ppb             | 55,725 cps        | 0.8 %         |
| 55Mn (KED) | 19.267 ppb            | 87,970 cps        | 3.3 %         |
| 56Fe (KED) | 440.274 ppb           | 3,853,325 cps     | 2.2 %         |
| 58Ni (KED) | 2.979 ppb             | 37,919 cps        | 1.4 %         |
| 59Co (KED) | 0.284 ppb             | 5,561 cps         | 4.1 %         |

| Category    | Concentration average | Intensity average | Intensity RSD |
|-------------|-----------------------|-------------------|---------------|
| 63Cu (KED)  | 10.894 ppb            | 164,008 cps       | 2.4 %         |
| 64Zn (KED)  | 176.656 ppb           | 651,520 cps       | 1.2 %         |
| 69Ga (KED)  | 2.705 ppb             | 12,309 cps        | 4.1 %         |
| 75As (KED)  | 0.496 ppb             | 637 cps           | 7.3 %         |
| 80Se (KED)  | 3.716 ppb             | 1,750 cps         | 6.3 %         |
| 85Rb (KED)  | 2.834 ppb             | 11,694 cps        | 2.3 %         |
| 88Sr (KED)  | 7.945 ppb             | 45,398 cps        | 1.9 %         |
| 107Ag (KED) | 0.091 ppb             | 4,724 cps         | 1.8 %         |
| 114Cd (KED) | 0.510 ppb             | 8,376 cps         | 2.1 %         |
| 133Cs (KED) | 0.084 ppb             | 2,003 cps         | 1.9 %         |
| 138Ba (KED) | 8.599 ppb             | 285,332 cps       | 2.0 %         |
| 139La (KED) | 0.438 ppb             | 29,312 cps        | 1.8 %         |
| 140Ce (KED) | 0.863 ppb             | 79,151 cps        | 0.6 %         |
| 141Pr (KED) | 0.099 ppb             | 9,258 cps         | 3.0 %         |
| 142Nd (KED) | 0.523 ppb             | 20,913 cps        | 4.1 %         |
| 152Sm (KED) | 0.070 ppb             | 2,706 cps         | 3.6 %         |
| 153Eu (KED) | 0.016 ppb             | 1,123 cps         | 8.9 %         |
| 158Gd (KED) | 0.065 ppb             | 3,479 cps         | 1.8 %         |
| 164Dy (KED) | 0.046 ppb             | 2,646 cps         | 1.0 %         |
| 165Ho (KED) | 0.009 ppb             | 1,868 cps         | 5.7 %         |
| 166Er (KED) | 0.026 ppb             | 1,891 cps         | 5.2 %         |
| 169Tm (KED) | 0.003 ppb             | 690 cps           | 7.3 %         |
| 174Yb (KED) | 0.019 ppb             | 1,689 cps         | 0.8 %         |
| 175Lu (KED) | 0.003 ppb             | 392 cps           | 7.2 %         |
| 205Tl (KED) | 0.010 ppb             | 1,787 cps         | 10.0 %        |
| 208Pb (KED) | 1.175 ppb             | 155,445 cps       | 2.6 %         |
| 232Th (KED) | 0.132 ppb             | 32,362 cps        | 2.5 %         |
| 238U (KED)  | 0.032 ppb             | 9,376 cps         | 21.5 %        |

## Sample Summary

Instrument ID: iCAP Q

Analysis index: 6

Analysis name: 1701637jian

Analysis started at: 8/30/2021 4:31:55 PM

User name: WINDOWS-UPCI4ER\Administrator

| Category    | Concentration average | Concentration RSD             |
|-------------|-----------------------|-------------------------------|
| 9Be (KED)   | 0.000 ppb             | 1,596,686,889,329,620,000.0 % |
| 11B (KED)   | 10.882 ppb            | 4.8 %                         |
| 24Mg (KED)  | 910.162 ppb           | 1.8 %                         |
| 27Al (KED)  | 655.990 ppb           | 1.4 %                         |
| 51V (KED)   | 1.314 ppb             | 1.5 %                         |
| 52Cr (KED)  | 6.419 ppb             | 1.6 %                         |
| 55Mn (KED)  | 21.229 ppb            | 1.0 %                         |
| 56Fe (KED)  | 545.099 ppb           | 1.8 %                         |
| 58Ni (KED)  | 3.995 ppb             | 2.0 %                         |
| 59Co (KED)  | 0.299 ppb             | 2.2 %                         |
| 63Cu (KED)  | 14.712 ppb            | 0.7 %                         |
| 64Zn (KED)  | 199.389 ppb           | 1.6 %                         |
| 69Ga (KED)  | 4.200 ppb             | 3.3 %                         |
| 75As (KED)  | 0.681 ppb             | 3.0 %                         |
| 80Se (KED)  | 3.408 ppb             | 1.4 %                         |
| 85Rb (KED)  | 2.803 ppb             | 0.8 %                         |
| 88Sr (KED)  | 9.419 ppb             | 0.1 %                         |
| 107Ag (KED) | 0.256 ppb             | 0.4 %                         |
| 114Cd (KED) | 0.489 ppb             | 3.5 %                         |
| 133Cs (KED) | 0.093 ppb             | 3.4 %                         |
| 138Ba (KED) | 12.007 ppb            | 2.5 %                         |
| 139La (KED) | 0.626 ppb             | 1.9 %                         |
| 140Ce (KED) | 1.221 ppb             | 4.1 %                         |
| 141Pr (KED) | 0.136 ppb             | 2.6 %                         |
| 142Nd (KED) | 0.692 ppb             | 2.8 %                         |
| 152Sm (KED) | 0.080 ppb             | 1.9 %                         |
| 153Eu (KED) | 0.019 ppb             | 1.7 %                         |
| 158Gd (KED) | 0.071 ppb             | 2.7 %                         |
| 164Dy (KED) | 0.048 ppb             | 2.1 %                         |
| 165Ho (KED) | 0.009 ppb             | 8.3 %                         |
| 166Er (KED) | 0.025 ppb             | 5.6 %                         |
| 169Tm (KED) | 0.004 ppb             | 11.8 %                        |
| 174Yb (KED) | 0.020 ppb             | 6.3 %                         |
| 175Lu (KED) | 0.003 ppb             | 11.7 %                        |
| 205Tl (KED) | 0.010 ppb             | 3.3 %                         |
| 208Pb (KED) | 1.198 ppb             | 0.8 %                         |
| 232Th (KED) | 0.118 ppb             | 5.1 %                         |
| 238U (KED)  | 0.029 ppb             | 3.2 %                         |

| Category   | Concentration average | Intensity average | Intensity RSD |
|------------|-----------------------|-------------------|---------------|
| 9Be (KED)  | 0.000 ppb             | 1 cps             | 173.2 %       |
| 11B (KED)  | 10.882 ppb            | 694 cps           | 4.5 %         |
| 24Mg (KED) | 910.162 ppb           | 351,845 cps       | 1.8 %         |
| 27Al (KED) | 655.990 ppb           | 60,644 cps        | 1.4 %         |
| 51V (KED)  | 1.314 ppb             | 8,108 cps         | 1.5 %         |
| 52Cr (KED) | 6.419 ppb             | 62,506 cps        | 1.6 %         |
| 55Mn (KED) | 21.229 ppb            | 96,844 cps        | 1.0 %         |
| 56Fe (KED) | 545.099 ppb           | 4,769,055 cps     | 1.8 %         |
| 58Ni (KED) | 3.995 ppb             | 50,070 cps        | 1.9 %         |
| 59Co (KED) | 0.299 ppb             | 5,848 cps         | 2.2 %         |

| Category    | Concentration average | Intensity average | Intensity RSD |
|-------------|-----------------------|-------------------|---------------|
| 63Cu (KED)  | 14.712 ppb            | 221,001 cps       | 0.7 %         |
| 64Zn (KED)  | 199.389 ppb           | 735,233 cps       | 1.6 %         |
| 69Ga (KED)  | 4.200 ppb             | 19,041 cps        | 3.3 %         |
| 75As (KED)  | 0.681 ppb             | 832 cps           | 2.6 %         |
| 80Se (KED)  | 3.408 ppb             | 1,657 cps         | 0.9 %         |
| 85Rb (KED)  | 2.803 ppb             | 11,565 cps        | 0.8 %         |
| 88Sr (KED)  | 9.419 ppb             | 53,807 cps        | 0.1 %         |
| 107Ag (KED) | 0.256 ppb             | 11,946 cps        | 0.4 %         |
| 114Cd (KED) | 0.489 ppb             | 8,029 cps         | 3.4 %         |
| 133Cs (KED) | 0.093 ppb             | 2,209 cps         | 3.2 %         |
| 138Ba (KED) | 12.007 ppb            | 396,816 cps       | 2.5 %         |
| 139La (KED) | 0.626 ppb             | 41,860 cps        | 1.9 %         |
| 140Ce (KED) | 1.221 ppb             | 111,970 cps       | 4.0 %         |
| 141Pr (KED) | 0.136 ppb             | 12,765 cps        | 2.6 %         |
| 142Nd (KED) | 0.692 ppb             | 27,657 cps        | 2.8 %         |
| 152Sm (KED) | 0.080 ppb             | 3,129 cps         | 1.9 %         |
| 153Eu (KED) | 0.019 ppb             | 1,382 cps         | 1.7 %         |
| 158Gd (KED) | 0.071 ppb             | 3,775 cps         | 2.7 %         |
| 164Dy (KED) | 0.048 ppb             | 2,773 cps         | 2.0 %         |
| 165Ho (KED) | 0.009 ppb             | 1,768 cps         | 8.3 %         |
| 166Er (KED) | 0.025 ppb             | 1,805 cps         | 5.4 %         |
| 169Tm (KED) | 0.004 ppb             | 882 cps           | 11.8 %        |
| 174Yb (KED) | 0.020 ppb             | 1,692 cps         | 6.3 %         |
| 175Lu (KED) | 0.003 ppb             | 391 cps           | 11.6 %        |
| 205Tl (KED) | 0.010 ppb             | 1,806 cps         | 3.3 %         |
| 208Pb (KED) | 1.198 ppb             | 158,295 cps       | 0.7 %         |
| 232Th (KED) | 0.118 ppb             | 28,826 cps        | 5.0 %         |
| 238U (KED)  | 0.029 ppb             | 8,412 cps         | 3.1 %         |

# Comprehensive

8/30/2021 5:35:01 PM

## Sample Summary

Instrument ID: iCAP Q

Analysis index: 7

Analysis name: 17004jian

Analysis started at: 8/30/2021 4:35:24 PM

User name: WINDOWS-UPCI4ER\Administrator

| Category    | Concentration average | Concentration RSD |
|-------------|-----------------------|-------------------|
| 9Be (KED)   | -0.010 ppb            | 0.0 %             |
| 11B (KED)   | 4.809 ppb             | 2.0 %             |
| 24Mg (KED)  | 1,028.549 ppb         | 1.9 %             |
| 27Al (KED)  | 858.828 ppb           | 1.1 %             |
| 51V (KED)   | 1.676 ppb             | 5.3 %             |
| 52Cr (KED)  | 5.774 ppb             | 2.3 %             |
| 55Mn (KED)  | 22.776 ppb            | 0.7 %             |
| 56Fe (KED)  | 655.514 ppb           | 1.3 %             |
| 58Ni (KED)  | 3.696 ppb             | 2.0 %             |
| 59Co (KED)  | 0.381 ppb             | 2.5 %             |
| 63Cu (KED)  | 11.852 ppb            | 0.6 %             |
| 64Zn (KED)  | 180.056 ppb           | 1.1 %             |
| 69Ga (KED)  | 4.549 ppb             | 3.5 %             |
| 75As (KED)  | 0.934 ppb             | 11.6 %            |
| 80Se (KED)  | 3.092 ppb             | 10.4 %            |
| 85Rb (KED)  | 4.681 ppb             | 1.8 %             |
| 88Sr (KED)  | 9.852 ppb             | 1.7 %             |
| 107Ag (KED) | 0.117 ppb             | 3.7 %             |
| 114Cd (KED) | 0.424 ppb             | 5.0 %             |
| 133Cs (KED) | 0.111 ppb             | 9.3 %             |
| 138Ba (KED) | 11.711 ppb            | 1.4 %             |
| 139La (KED) | 0.577 ppb             | 2.7 %             |
| 140Ce (KED) | 1.174 ppb             | 3.9 %             |
| 141Pr (KED) | 0.139 ppb             | 3.4 %             |
| 142Nd (KED) | 0.716 ppb             | 6.3 %             |
| 152Sm (KED) | 0.101 ppb             | 4.1 %             |
| 153Eu (KED) | 0.021 ppb             | 8.2 %             |
| 158Gd (KED) | 0.089 ppb             | 2.4 %             |
| 164Dy (KED) | 0.063 ppb             | 4.7 %             |
| 165Ho (KED) | 0.013 ppb             | 1.3 %             |
| 166Er (KED) | 0.034 ppb             | 2.0 %             |
| 169Tm (KED) | 0.004 ppb             | 12.5 %            |
| 174Yb (KED) | 0.027 ppb             | 5.8 %             |
| 175Lu (KED) | 0.004 ppb             | 10.3 %            |
| 205Tl (KED) | 0.010 ppb             | 8.1 %             |
| 208Pb (KED) | 1.510 ppb             | 3.3 %             |
| 232Th (KED) | 0.148 ppb             | 2.5 %             |
| 238U (KED)  | 0.032 ppb             | 4.1 %             |

| Category   | Concentration average | Intensity average | Intensity RSD |
|------------|-----------------------|-------------------|---------------|
| 9Be (KED)  | -0.010 ppb            | 0 cps             |               |
| 11B (KED)  | 4.809 ppb             | 337 cps           | 1.7 %         |
| 24Mg (KED) | 1,028.549 ppb         | 397,584 cps       | 1.9 %         |
| 27Al (KED) | 858.828 ppb           | 79,364 cps        | 1.1 %         |
| 51V (KED)  | 1.676 ppb             | 10,344 cps        | 5.3 %         |
| 52Cr (KED) | 5.774 ppb             | 56,249 cps        | 2.3 %         |
| 55Mn (KED) | 22.776 ppb            | 103,841 cps       | 0.7 %         |
| 56Fe (KED) | 655.514 ppb           | 5,733,629 cps     | 1.3 %         |
| 58Ni (KED) | 3.696 ppb             | 46,493 cps        | 1.9 %         |
| 59Co (KED) | 0.381 ppb             | 7,453 cps         | 2.5 %         |

| Category    | Concentration average | Intensity average | Intensity RSD |
|-------------|-----------------------|-------------------|---------------|
| 63Cu (KED)  | 11.852 ppb            | 178,312 cps       | 0.6 %         |
| 64Zn (KED)  | 180.056 ppb           | 664,041 cps       | 1.1 %         |
| 69Ga (KED)  | 4.549 ppb             | 20,609 cps        | 3.5 %         |
| 75As (KED)  | 0.934 ppb             | 1,101 cps         | 10.5 %        |
| 80Se (KED)  | 3.092 ppb             | 1,561 cps         | 6.2 %         |
| 85Rb (KED)  | 4.681 ppb             | 19,295 cps        | 1.8 %         |
| 88Sr (KED)  | 9.852 ppb             | 56,280 cps        | 1.7 %         |
| 107Ag (KED) | 0.117 ppb             | 5,831 cps         | 3.2 %         |
| 114Cd (KED) | 0.424 ppb             | 6,979 cps         | 4.9 %         |
| 133Cs (KED) | 0.111 ppb             | 2,619 cps         | 8.9 %         |
| 138Ba (KED) | 11.711 ppb            | 387,135 cps       | 1.3 %         |
| 139La (KED) | 0.577 ppb             | 38,561 cps        | 2.7 %         |
| 140Ce (KED) | 1.174 ppb             | 107,628 cps       | 3.9 %         |
| 141Pr (KED) | 0.139 ppb             | 13,057 cps        | 3.4 %         |
| 142Nd (KED) | 0.716 ppb             | 28,642 cps        | 6.3 %         |
| 152Sm (KED) | 0.101 ppb             | 3,926 cps         | 4.1 %         |
| 153Eu (KED) | 0.021 ppb             | 1,513 cps         | 8.2 %         |
| 158Gd (KED) | 0.089 ppb             | 4,729 cps         | 2.4 %         |
| 164Dy (KED) | 0.063 ppb             | 3,609 cps         | 4.7 %         |
| 165Ho (KED) | 0.013 ppb             | 2,531 cps         | 1.3 %         |
| 166Er (KED) | 0.034 ppb             | 2,495 cps         | 1.9 %         |
| 169Tm (KED) | 0.004 ppb             | 1,046 cps         | 12.5 %        |
| 174Yb (KED) | 0.027 ppb             | 2,364 cps         | 5.8 %         |
| 175Lu (KED) | 0.004 ppb             | 480 cps           | 10.3 %        |
| 205Tl (KED) | 0.010 ppb             | 1,858 cps         | 8.0 %         |
| 208Pb (KED) | 1.510 ppb             | 197,678 cps       | 3.2 %         |
| 232Th (KED) | 0.148 ppb             | 36,004 cps        | 2.4 %         |
| 238U (KED)  | 0.032 ppb             | 9,172 cps         | 4.0 %         |

# Comprehensive

8/30/2021 5:35:01 PM

## Sample Summary

Instrument ID: iCAP Q

Analysis index: 8

Analysis name: 1702003jian

Analysis started at: 8/30/2021 4:38:51 PM

User name: WINDOWS-UPCI4ER\Administrator

| Category    | Concentration average | Concentration RSD |
|-------------|-----------------------|-------------------|
| 9Be (KED)   | 0.021 ppb             | 150.0 %           |
| 11B (KED)   | 2.433 ppb             | 12.9 %            |
| 24Mg (KED)  | 595.173 ppb           | 0.9 %             |
| 27Al (KED)  | 468.047 ppb           | 1.8 %             |
| 51V (KED)   | 0.829 ppb             | 1.5 %             |
| 52Cr (KED)  | 4.593 ppb             | 3.3 %             |
| 55Mn (KED)  | 15.524 ppb            | 1.9 %             |
| 56Fe (KED)  | 435.497 ppb           | 0.7 %             |
| 58Ni (KED)  | 2.682 ppb             | 1.1 %             |
| 59Co (KED)  | 0.259 ppb             | 1.7 %             |
| 63Cu (KED)  | 14.627 ppb            | 1.1 %             |
| 64Zn (KED)  | 192.870 ppb           | 1.1 %             |
| 69Ga (KED)  | 4.908 ppb             | 0.9 %             |
| 75As (KED)  | 0.695 ppb             | 13.7 %            |
| 80Se (KED)  | 3.691 ppb             | 6.4 %             |
| 85Rb (KED)  | 2.443 ppb             | 4.8 %             |
| 88Sr (KED)  | 5.518 ppb             | 1.7 %             |
| 107Ag (KED) | 0.296 ppb             | 1.4 %             |
| 114Cd (KED) | 0.557 ppb             | 2.5 %             |
| 133Cs (KED) | 0.058 ppb             | 6.5 %             |
| 138Ba (KED) | 12.397 ppb            | 0.7 %             |
| 139La (KED) | 0.294 ppb             | 2.8 %             |
| 140Ce (KED) | 0.598 ppb             | 2.3 %             |
| 141Pr (KED) | 0.068 ppb             | 1.3 %             |
| 142Nd (KED) | 0.356 ppb             | 2.9 %             |
| 152Sm (KED) | 0.050 ppb             | 0.3 %             |
| 153Eu (KED) | 0.012 ppb             | 6.0 %             |
| 158Gd (KED) | 0.042 ppb             | 6.7 %             |
| 164Dy (KED) | 0.031 ppb             | 6.9 %             |
| 165Ho (KED) | 0.006 ppb             | 8.8 %             |
| 166Er (KED) | 0.015 ppb             | 11.7 %            |
| 169Tm (KED) | 0.002 ppb             | 5.2 %             |
| 174Yb (KED) | 0.014 ppb             | 3.3 %             |
| 175Lu (KED) | 0.002 ppb             | 7.9 %             |
| 205Tl (KED) | 0.011 ppb             | 7.5 %             |
| 208Pb (KED) | 1.092 ppb             | 3.2 %             |
| 232Th (KED) | 0.072 ppb             | 5.0 %             |
| 238U (KED)  | 0.022 ppb             | 5.1 %             |

| Category   | Concentration average | Intensity average | Intensity RSD |
|------------|-----------------------|-------------------|---------------|
| 9Be (KED)  | 0.021 ppb             | 3 cps             | 100.0 %       |
| 11B (KED)  | 2.433 ppb             | 197 cps           | 9.4 %         |
| 24Mg (KED) | 595.173 ppb           | 230,146 cps       | 0.9 %         |
| 27Al (KED) | 468.047 ppb           | 43,299 cps        | 1.8 %         |
| 51V (KED)  | 0.829 ppb             | 5,119 cps         | 1.5 %         |
| 52Cr (KED) | 4.593 ppb             | 44,795 cps        | 3.3 %         |
| 55Mn (KED) | 15.524 ppb            | 71,038 cps        | 1.9 %         |
| 56Fe (KED) | 435.497 ppb           | 3,811,592 cps     | 0.7 %         |
| 58Ni (KED) | 2.682 ppb             | 34,361 cps        | 1.0 %         |
| 59Co (KED) | 0.259 ppb             | 5,069 cps         | 1.7 %         |

| Category    | Concentration average | Intensity average | Intensity RSD |
|-------------|-----------------------|-------------------|---------------|
| 63Cu (KED)  | 14.627 ppb            | 219,736 cps       | 1.1 %         |
| 64Zn (KED)  | 192.870 ppb           | 711,228 cps       | 1.1 %         |
| 69Ga (KED)  | 4.908 ppb             | 22,224 cps        | 0.9 %         |
| 75As (KED)  | 0.695 ppb             | 848 cps           | 11.9 %        |
| 80Se (KED)  | 3.691 ppb             | 1,742 cps         | 4.1 %         |
| 85Rb (KED)  | 2.443 ppb             | 10,084 cps        | 4.8 %         |
| 88Sr (KED)  | 5.518 ppb             | 31,555 cps        | 1.7 %         |
| 107Ag (KED) | 0.296 ppb             | 13,663 cps        | 1.3 %         |
| 114Cd (KED) | 0.557 ppb             | 9,121 cps         | 2.5 %         |
| 133Cs (KED) | 0.058 ppb             | 1,428 cps         | 6.0 %         |
| 138Ba (KED) | 12.397 ppb            | 409,567 cps       | 0.7 %         |
| 139La (KED) | 0.294 ppb             | 19,673 cps        | 2.8 %         |
| 140Ce (KED) | 0.598 ppb             | 54,962 cps        | 2.3 %         |
| 141Pr (KED) | 0.068 ppb             | 6,386 cps         | 1.3 %         |
| 142Nd (KED) | 0.356 ppb             | 14,279 cps        | 2.9 %         |
| 152Sm (KED) | 0.050 ppb             | 1,956 cps         | 0.3 %         |
| 153Eu (KED) | 0.012 ppb             | 888 cps           | 5.9 %         |
| 158Gd (KED) | 0.042 ppb             | 2,246 cps         | 6.7 %         |
| 164Dy (KED) | 0.031 ppb             | 1,777 cps         | 6.9 %         |
| 165Ho (KED) | 0.006 ppb             | 1,180 cps         | 8.8 %         |
| 166Er (KED) | 0.015 ppb             | 1,107 cps         | 11.1 %        |
| 169Tm (KED) | 0.002 ppb             | 459 cps           | 5.2 %         |
| 174Yb (KED) | 0.014 ppb             | 1,179 cps         | 3.3 %         |
| 175Lu (KED) | 0.002 ppb             | 242 cps           | 7.8 %         |
| 205Tl (KED) | 0.011 ppb             | 1,925 cps         | 7.4 %         |
| 208Pb (KED) | 1.092 ppb             | 144,944 cps       | 3.1 %         |
| 232Th (KED) | 0.072 ppb             | 17,814 cps        | 4.8 %         |
| 238U (KED)  | 0.022 ppb             | 6,346 cps         | 5.0 %         |

# Comprehensive

8/30/2021 5:35:01 PM

## Sample Summary

Instrument ID: iCAP Q

Analysis index: 9

Analysis name: 1701508jian

Analysis started at: 8/30/2021 4:42:04 PM

User name: WINDOWS-UPCI4ER\Administrator

| Category    | Concentration average | Concentration RSD |
|-------------|-----------------------|-------------------|
| 9Be (KED)   | -0.010 ppb            | 0.0 %             |
| 11B (KED)   | 2.282 ppb             | 10.0 %            |
| 24Mg (KED)  | 431.733 ppb           | 1.6 %             |
| 27Al (KED)  | 421.507 ppb           | 3.6 %             |
| 51V (KED)   | 0.808 ppb             | 1.6 %             |
| 52Cr (KED)  | 5.554 ppb             | 6.1 %             |
| 55Mn (KED)  | 14.873 ppb            | 1.0 %             |
| 56Fe (KED)  | 364.784 ppb           | 1.3 %             |
| 58Ni (KED)  | 2.342 ppb             | 0.8 %             |
| 59Co (KED)  | 0.234 ppb             | 2.1 %             |
| 63Cu (KED)  | 9.758 ppb             | 1.5 %             |
| 64Zn (KED)  | 190.264 ppb           | 1.6 %             |
| 69Ga (KED)  | 2.460 ppb             | 2.3 %             |
| 75As (KED)  | 0.598 ppb             | 7.5 %             |
| 80Se (KED)  | 3.379 ppb             | 7.4 %             |
| 85Rb (KED)  | 1.317 ppb             | 4.2 %             |
| 88Sr (KED)  | 4.824 ppb             | 2.1 %             |
| 107Ag (KED) | 0.102 ppb             | 1.9 %             |
| 114Cd (KED) | 0.471 ppb             | 2.0 %             |
| 133Cs (KED) | 0.051 ppb             | 4.7 %             |
| 138Ba (KED) | 6.708 ppb             | 1.3 %             |
| 139La (KED) | 0.275 ppb             | 1.9 %             |
| 140Ce (KED) | 0.562 ppb             | 2.6 %             |
| 141Pr (KED) | 0.064 ppb             | 2.3 %             |
| 142Nd (KED) | 0.331 ppb             | 1.9 %             |
| 152Sm (KED) | 0.044 ppb             | 8.5 %             |
| 153Eu (KED) | 0.010 ppb             | 6.1 %             |
| 158Gd (KED) | 0.040 ppb             | 9.0 %             |
| 164Dy (KED) | 0.030 ppb             | 5.0 %             |
| 165Ho (KED) | 0.006 ppb             | 3.1 %             |
| 166Er (KED) | 0.014 ppb             | 5.1 %             |
| 169Tm (KED) | 0.002 ppb             | 5.1 %             |
| 174Yb (KED) | 0.014 ppb             | 17.8 %            |
| 175Lu (KED) | 0.002 ppb             | 15.1 %            |
| 205Tl (KED) | 0.008 ppb             | 9.2 %             |
| 208Pb (KED) | 1.355 ppb             | 1.7 %             |
| 232Th (KED) | 0.065 ppb             | 4.6 %             |
| 238U (KED)  | 0.020 ppb             | 1.1 %             |

| Category   | Concentration average | Intensity average | Intensity RSD |
|------------|-----------------------|-------------------|---------------|
| 9Be (KED)  | -0.010 ppb            | 0 cps             |               |
| 11B (KED)  | 2.282 ppb             | 188 cps           | 7.2 %         |
| 24Mg (KED) | 431.733 ppb           | 166,999 cps       | 1.6 %         |
| 27Al (KED) | 421.507 ppb           | 39,003 cps        | 3.5 %         |
| 51V (KED)  | 0.808 ppb             | 4,993 cps         | 1.6 %         |
| 52Cr (KED) | 5.554 ppb             | 54,116 cps        | 6.1 %         |
| 55Mn (KED) | 14.873 ppb            | 68,095 cps        | 1.0 %         |
| 56Fe (KED) | 364.784 ppb           | 3,193,852 cps     | 1.3 %         |
| 58Ni (KED) | 2.342 ppb             | 30,297 cps        | 0.8 %         |
| 59Co (KED) | 0.234 ppb             | 4,576 cps         | 2.1 %         |

| Category    | Concentration average | Intensity average | Intensity RSD |
|-------------|-----------------------|-------------------|---------------|
| 63Cu (KED)  | 9.758 ppb             | 147,050 cps       | 1.5 %         |
| 64Zn (KED)  | 190.264 ppb           | 701,630 cps       | 1.6 %         |
| 69Ga (KED)  | 2.460 ppb             | 11,209 cps        | 2.3 %         |
| 75As (KED)  | 0.598 ppb             | 744 cps           | 6.4 %         |
| 80Se (KED)  | 3.379 ppb             | 1,648 cps         | 4.6 %         |
| 85Rb (KED)  | 1.317 ppb             | 5,453 cps         | 4.2 %         |
| 88Sr (KED)  | 4.824 ppb             | 27,596 cps        | 2.1 %         |
| 107Ag (KED) | 0.102 ppb             | 5,174 cps         | 1.6 %         |
| 114Cd (KED) | 0.471 ppb             | 7,749 cps         | 2.0 %         |
| 133Cs (KED) | 0.051 ppb             | 1,271 cps         | 4.3 %         |
| 138Ba (KED) | 6.708 ppb             | 223,489 cps       | 1.3 %         |
| 139La (KED) | 0.275 ppb             | 18,428 cps        | 1.9 %         |
| 140Ce (KED) | 0.562 ppb             | 51,654 cps        | 2.6 %         |
| 141Pr (KED) | 0.064 ppb             | 5,986 cps         | 2.2 %         |
| 142Nd (KED) | 0.331 ppb             | 13,287 cps        | 1.9 %         |
| 152Sm (KED) | 0.044 ppb             | 1,715 cps         | 8.5 %         |
| 153Eu (KED) | 0.010 ppb             | 714 cps           | 6.1 %         |
| 158Gd (KED) | 0.040 ppb             | 2,137 cps         | 9.0 %         |
| 164Dy (KED) | 0.030 ppb             | 1,753 cps         | 5.0 %         |
| 165Ho (KED) | 0.006 ppb             | 1,156 cps         | 3.1 %         |
| 166Er (KED) | 0.014 ppb             | 1,083 cps         | 4.8 %         |
| 169Tm (KED) | 0.002 ppb             | 529 cps           | 5.1 %         |
| 174Yb (KED) | 0.014 ppb             | 1,199 cps         | 17.8 %        |
| 175Lu (KED) | 0.002 ppb             | 243 cps           | 15.1 %        |
| 205Tl (KED) | 0.008 ppb             | 1,530 cps         | 9.1 %         |
| 208Pb (KED) | 1.355 ppb             | 178,167 cps       | 1.6 %         |
| 232Th (KED) | 0.065 ppb             | 16,077 cps        | 4.5 %         |
| 238U (KED)  | 0.020 ppb             | 5,905 cps         | 1.1 %         |

# Comprehensive

8/30/2021 5:35:01 PM

## Sample Summary

Instrument ID: iCAP Q

Analysis index: 10

Analysis name: 18096jian

Analysis started at: 8/30/2021 4:45:23 PM

User name: WINDOWS-UPCI4ER\Administrator

| Category    | Concentration average | Concentration RSD |
|-------------|-----------------------|-------------------|
| 9Be (KED)   | 0.073 ppb             | 65.5 %            |
| 11B (KED)   | 4.017 ppb             | 23.9 %            |
| 24Mg (KED)  | 532.414 ppb           | 1.0 %             |
| 27Al (KED)  | 684.627 ppb           | 2.5 %             |
| 51V (KED)   | 1.364 ppb             | 1.6 %             |
| 52Cr (KED)  | 5.409 ppb             | 0.4 %             |
| 55Mn (KED)  | 19.208 ppb            | 1.8 %             |
| 56Fe (KED)  | 650.666 ppb           | 1.2 %             |
| 58Ni (KED)  | 3.232 ppb             | 1.8 %             |
| 59Co (KED)  | 0.309 ppb             | 2.5 %             |
| 63Cu (KED)  | 8.609 ppb             | 1.2 %             |
| 64Zn (KED)  | 192.442 ppb           | 0.8 %             |
| 69Ga (KED)  | 2.138 ppb             | 2.0 %             |
| 75As (KED)  | 0.747 ppb             | 4.4 %             |
| 80Se (KED)  | 1.597 ppb             | 2.9 %             |
| 85Rb (KED)  | 1.548 ppb             | 2.3 %             |
| 88Sr (KED)  | 6.169 ppb             | 3.5 %             |
| 107Ag (KED) | 0.032 ppb             | 3.8 %             |
| 114Cd (KED) | 0.219 ppb             | 3.4 %             |
| 133Cs (KED) | 0.118 ppb             | 2.5 %             |
| 138Ba (KED) | 6.187 ppb             | 2.3 %             |
| 139La (KED) | 0.519 ppb             | 1.2 %             |
| 140Ce (KED) | 1.307 ppb             | 33.0 %            |
| 141Pr (KED) | 0.118 ppb             | 3.2 %             |
| 142Nd (KED) | 0.643 ppb             | 6.1 %             |
| 152Sm (KED) | 0.078 ppb             | 5.2 %             |
| 153Eu (KED) | 0.016 ppb             | 12.4 %            |
| 158Gd (KED) | 0.071 ppb             | 4.9 %             |
| 164Dy (KED) | 0.048 ppb             | 1.1 %             |
| 165Ho (KED) | 0.009 ppb             | 1.3 %             |
| 166Er (KED) | 0.024 ppb             | 1.9 %             |
| 169Tm (KED) | 0.003 ppb             | 4.3 %             |
| 174Yb (KED) | 0.020 ppb             | 8.9 %             |
| 175Lu (KED) | 0.003 ppb             | 7.6 %             |
| 205Tl (KED) | 0.012 ppb             | 8.4 %             |
| 208Pb (KED) | 1.259 ppb             | 2.2 %             |
| 232Th (KED) | 0.140 ppb             | 0.6 %             |
| 238U (KED)  | 0.038 ppb             | 1.4 %             |

| Category   | Concentration average | Intensity average | Intensity RSD |
|------------|-----------------------|-------------------|---------------|
| 9Be (KED)  | 0.073 ppb             | 9 cps             | 57.3 %        |
| 11B (KED)  | 4.017 ppb             | 290 cps           | 19.5 %        |
| 24Mg (KED) | 532.414 ppb           | 205,899 cps       | 1.0 %         |
| 27Al (KED) | 684.627 ppb           | 63,287 cps        | 2.5 %         |
| 51V (KED)  | 1.364 ppb             | 8,422 cps         | 1.6 %         |
| 52Cr (KED) | 5.409 ppb             | 52,708 cps        | 0.4 %         |
| 55Mn (KED) | 19.208 ppb            | 87,700 cps        | 1.7 %         |
| 56Fe (KED) | 650.666 ppb           | 5,691,275 cps     | 1.2 %         |
| 58Ni (KED) | 3.232 ppb             | 40,943 cps        | 1.7 %         |
| 59Co (KED) | 0.309 ppb             | 6,046 cps         | 2.5 %         |

| Category    | Concentration average | Intensity average | Intensity RSD |
|-------------|-----------------------|-------------------|---------------|
| 63Cu (KED)  | 8.609 ppb             | 129,898 cps       | 1.2 %         |
| 64Zn (KED)  | 192.442 ppb           | 709,650 cps       | 0.8 %         |
| 69Ga (KED)  | 2.138 ppb             | 9,759 cps         | 2.0 %         |
| 75As (KED)  | 0.747 ppb             | 902 cps           | 3.8 %         |
| 80Se (KED)  | 1.597 ppb             | 1,109 cps         | 1.3 %         |
| 85Rb (KED)  | 1.548 ppb             | 6,403 cps         | 2.3 %         |
| 88Sr (KED)  | 6.169 ppb             | 35,268 cps        | 3.5 %         |
| 107Ag (KED) | 0.032 ppb             | 2,124 cps         | 2.5 %         |
| 114Cd (KED) | 0.219 ppb             | 3,678 cps         | 3.3 %         |
| 133Cs (KED) | 0.118 ppb             | 2,780 cps         | 2.4 %         |
| 138Ba (KED) | 6.187 ppb             | 206,447 cps       | 2.3 %         |
| 139La (KED) | 0.519 ppb             | 34,674 cps        | 1.2 %         |
| 140Ce (KED) | 1.307 ppb             | 119,844 cps       | 32.9 %        |
| 141Pr (KED) | 0.118 ppb             | 11,052 cps        | 3.2 %         |
| 142Nd (KED) | 0.643 ppb             | 25,696 cps        | 6.1 %         |
| 152Sm (KED) | 0.078 ppb             | 3,049 cps         | 5.2 %         |
| 153Eu (KED) | 0.016 ppb             | 1,162 cps         | 12.3 %        |
| 158Gd (KED) | 0.071 ppb             | 3,765 cps         | 4.9 %         |
| 164Dy (KED) | 0.048 ppb             | 2,735 cps         | 1.1 %         |
| 165Ho (KED) | 0.009 ppb             | 1,833 cps         | 1.3 %         |
| 166Er (KED) | 0.024 ppb             | 1,772 cps         | 1.8 %         |
| 169Tm (KED) | 0.003 ppb             | 808 cps           | 4.3 %         |
| 174Yb (KED) | 0.020 ppb             | 1,746 cps         | 8.9 %         |
| 175Lu (KED) | 0.003 ppb             | 414 cps           | 7.6 %         |
| 205Tl (KED) | 0.012 ppb             | 2,196 cps         | 8.3 %         |
| 208Pb (KED) | 1.259 ppb             | 166,010 cps       | 2.1 %         |
| 232Th (KED) | 0.140 ppb             | 34,142 cps        | 0.6 %         |
| 238U (KED)  | 0.038 ppb             | 10,969 cps        | 1.4 %         |

# Comprehensive

8/30/2021 5:35:01 PM

## Sample Summary

Instrument ID: iCAP Q

Analysis index: 11

Analysis name: 18003jian

Analysis started at: 8/30/2021 4:48:50 PM

User name: WINDOWS-UPCI4ER\Administrator

| Category    | Concentration average | Concentration RSD |
|-------------|-----------------------|-------------------|
| 9Be (KED)   | 0.010 ppb             | 173.2 %           |
| 11B (KED)   | 9.694 ppb             | 13.3 %            |
| 24Mg (KED)  | 432.852 ppb           | 1.0 %             |
| 27Al (KED)  | 628.010 ppb           | 2.9 %             |
| 51V (KED)   | 1.160 ppb             | 2.9 %             |
| 52Cr (KED)  | 4.383 ppb             | 1.4 %             |
| 55Mn (KED)  | 16.839 ppb            | 1.6 %             |
| 56Fe (KED)  | 490.804 ppb           | 1.0 %             |
| 58Ni (KED)  | 2.324 ppb             | 2.2 %             |
| 59Co (KED)  | 0.259 ppb             | 2.5 %             |
| 63Cu (KED)  | 6.703 ppb             | 1.6 %             |
| 64Zn (KED)  | 181.794 ppb           | 1.1 %             |
| 69Ga (KED)  | 1.781 ppb             | 3.0 %             |
| 75As (KED)  | 0.546 ppb             | 1.2 %             |
| 80Se (KED)  | 2.905 ppb             | 6.7 %             |
| 85Rb (KED)  | 1.237 ppb             | 1.2 %             |
| 88Sr (KED)  | 5.867 ppb             | 2.8 %             |
| 107Ag (KED) | 0.069 ppb             | 2.2 %             |
| 114Cd (KED) | 0.421 ppb             | 0.9 %             |
| 133Cs (KED) | 0.100 ppb             | 3.0 %             |
| 138Ba (KED) | 5.228 ppb             | 3.8 %             |
| 139La (KED) | 0.425 ppb             | 3.1 %             |
| 140Ce (KED) | 0.838 ppb             | 1.6 %             |
| 141Pr (KED) | 0.094 ppb             | 2.0 %             |
| 142Nd (KED) | 0.490 ppb             | 2.8 %             |
| 152Sm (KED) | 0.064 ppb             | 5.4 %             |
| 153Eu (KED) | 0.013 ppb             | 1.1 %             |
| 158Gd (KED) | 0.061 ppb             | 12.7 %            |
| 164Dy (KED) | 0.043 ppb             | 3.0 %             |
| 165Ho (KED) | 0.008 ppb             | 2.6 %             |
| 166Er (KED) | 0.022 ppb             | 4.9 %             |
| 169Tm (KED) | 0.003 ppb             | 13.0 %            |
| 174Yb (KED) | 0.018 ppb             | 1.5 %             |
| 175Lu (KED) | 0.003 ppb             | 4.6 %             |
| 205Tl (KED) | 0.010 ppb             | 7.7 %             |
| 208Pb (KED) | 1.026 ppb             | 2.9 %             |
| 232Th (KED) | 0.123 ppb             | 4.1 %             |
| 238U (KED)  | 0.037 ppb             | 13.7 %            |

| Category   | Concentration average | Intensity average | Intensity RSD |
|------------|-----------------------|-------------------|---------------|
| 9Be (KED)  | 0.010 ppb             | 2 cps             | 86.6 %        |
| 11B (KED)  | 9.694 ppb             | 624 cps           | 12.1 %        |
| 24Mg (KED) | 432.852 ppb           | 167,432 cps       | 1.0 %         |
| 27Al (KED) | 628.010 ppb           | 58,062 cps        | 2.9 %         |
| 51V (KED)  | 1.160 ppb             | 7,164 cps         | 2.9 %         |
| 52Cr (KED) | 4.383 ppb             | 42,760 cps        | 1.4 %         |
| 55Mn (KED) | 16.839 ppb            | 76,988 cps        | 1.6 %         |
| 56Fe (KED) | 490.804 ppb           | 4,294,744 cps     | 1.0 %         |
| 58Ni (KED) | 2.324 ppb             | 30,079 cps        | 2.1 %         |
| 59Co (KED) | 0.259 ppb             | 5,064 cps         | 2.5 %         |

| Category    | Concentration average | Intensity average | Intensity RSD |
|-------------|-----------------------|-------------------|---------------|
| 63Cu (KED)  | 6.703 ppb             | 101,454 cps       | 1.5 %         |
| 64Zn (KED)  | 181.794 ppb           | 670,440 cps       | 1.1 %         |
| 69Ga (KED)  | 1.781 ppb             | 8,150 cps         | 3.0 %         |
| 75As (KED)  | 0.546 ppb             | 689 cps           | 1.0 %         |
| 80Se (KED)  | 2.905 ppb             | 1,505 cps         | 3.9 %         |
| 85Rb (KED)  | 1.237 ppb             | 5,124 cps         | 1.2 %         |
| 88Sr (KED)  | 5.867 ppb             | 33,544 cps        | 2.8 %         |
| 107Ag (KED) | 0.069 ppb             | 3,726 cps         | 1.8 %         |
| 114Cd (KED) | 0.421 ppb             | 6,935 cps         | 0.9 %         |
| 133Cs (KED) | 0.100 ppb             | 2,372 cps         | 2.8 %         |
| 138Ba (KED) | 5.228 ppb             | 175,082 cps       | 3.7 %         |
| 139La (KED) | 0.425 ppb             | 28,425 cps        | 3.1 %         |
| 140Ce (KED) | 0.838 ppb             | 76,929 cps        | 1.6 %         |
| 141Pr (KED) | 0.094 ppb             | 8,815 cps         | 2.0 %         |
| 142Nd (KED) | 0.490 ppb             | 19,630 cps        | 2.8 %         |
| 152Sm (KED) | 0.064 ppb             | 2,502 cps         | 5.4 %         |
| 153Eu (KED) | 0.013 ppb             | 952 cps           | 1.1 %         |
| 158Gd (KED) | 0.061 ppb             | 3,253 cps         | 12.7 %        |
| 164Dy (KED) | 0.043 ppb             | 2,444 cps         | 3.0 %         |
| 165Ho (KED) | 0.008 ppb             | 1,540 cps         | 2.6 %         |
| 166Er (KED) | 0.022 ppb             | 1,627 cps         | 4.8 %         |
| 169Tm (KED) | 0.003 ppb             | 651 cps           | 13.0 %        |
| 174Yb (KED) | 0.018 ppb             | 1,520 cps         | 1.5 %         |
| 175Lu (KED) | 0.003 ppb             | 372 cps           | 4.6 %         |
| 205Tl (KED) | 0.010 ppb             | 1,830 cps         | 7.7 %         |
| 208Pb (KED) | 1.026 ppb             | 136,572 cps       | 2.8 %         |
| 232Th (KED) | 0.123 ppb             | 30,144 cps        | 4.0 %         |
| 238U (KED)  | 0.037 ppb             | 10,755 cps        | 13.6 %        |

# Comprehensive

8/30/2021 5:35:01 PM

## Sample Summary

Instrument ID: iCAP Q

Analysis index: 12

Analysis name: 18001jian

Analysis started at: 8/30/2021 4:52:14 PM

User name: WINDOWS-UPCI4ER\Administrator

| Category    | Concentration average | Concentration RSD             |
|-------------|-----------------------|-------------------------------|
| 9Be (KED)   | 0.000 ppb             | 1,596,686,889,329,620,000.0 % |
| 11B (KED)   | 4.281 ppb             | 10.6 %                        |
| 24Mg (KED)  | 593.484 ppb           | 1.9 %                         |
| 27Al (KED)  | 723.018 ppb           | 3.6 %                         |
| 51V (KED)   | 1.323 ppb             | 1.8 %                         |
| 52Cr (KED)  | 3.902 ppb             | 2.8 %                         |
| 55Mn (KED)  | 18.911 ppb            | 1.7 %                         |
| 56Fe (KED)  | 595.050 ppb           | 1.6 %                         |
| 58Ni (KED)  | 3.095 ppb             | 0.4 %                         |
| 59Co (KED)  | 1.142 ppb             | 126.0 %                       |
| 63Cu (KED)  | 7.735 ppb             | 1.6 %                         |
| 64Zn (KED)  | 186.128 ppb           | 0.3 %                         |
| 69Ga (KED)  | 2.213 ppb             | 3.8 %                         |
| 75As (KED)  | 0.819 ppb             | 3.8 %                         |
| 80Se (KED)  | 3.474 ppb             | 6.1 %                         |
| 85Rb (KED)  | 1.925 ppb             | 0.4 %                         |
| 88Sr (KED)  | 6.483 ppb             | 0.7 %                         |
| 107Ag (KED) | 0.097 ppb             | 5.2 %                         |
| 114Cd (KED) | 0.425 ppb             | 1.1 %                         |
| 133Cs (KED) | 0.118 ppb             | 4.4 %                         |
| 138Ba (KED) | 6.275 ppb             | 1.7 %                         |
| 139La (KED) | 0.550 ppb             | 2.3 %                         |
| 140Ce (KED) | 1.068 ppb             | 3.3 %                         |
| 141Pr (KED) | 0.125 ppb             | 9.4 %                         |
| 142Nd (KED) | 0.650 ppb             | 2.6 %                         |
| 152Sm (KED) | 0.080 ppb             | 3.2 %                         |
| 153Eu (KED) | 0.018 ppb             | 1.7 %                         |
| 158Gd (KED) | 0.070 ppb             | 7.5 %                         |
| 164Dy (KED) | 0.049 ppb             | 0.8 %                         |
| 165Ho (KED) | 0.009 ppb             | 4.3 %                         |
| 166Er (KED) | 0.025 ppb             | 4.1 %                         |
| 169Tm (KED) | 0.003 ppb             | 6.1 %                         |
| 174Yb (KED) | 0.023 ppb             | 12.6 %                        |
| 175Lu (KED) | 0.003 ppb             | 14.3 %                        |
| 205Tl (KED) | 0.013 ppb             | 5.5 %                         |
| 208Pb (KED) | 1.076 ppb             | 2.2 %                         |
| 232Th (KED) | 0.151 ppb             | 1.0 %                         |
| 238U (KED)  | 0.042 ppb             | 12.6 %                        |

| Category   | Concentration average | Intensity average | Intensity RSD |
|------------|-----------------------|-------------------|---------------|
| 9Be (KED)  | 0.000 ppb             | 1 cps             | 173.2 %       |
| 11B (KED)  | 4.281 ppb             | 306 cps           | 8.8 %         |
| 24Mg (KED) | 593.484 ppb           | 229,493 cps       | 1.9 %         |
| 27Al (KED) | 723.018 ppb           | 66,830 cps        | 3.6 %         |
| 51V (KED)  | 1.323 ppb             | 8,168 cps         | 1.8 %         |
| 52Cr (KED) | 3.902 ppb             | 38,091 cps        | 2.8 %         |
| 55Mn (KED) | 18.911 ppb            | 86,359 cps        | 1.7 %         |
| 56Fe (KED) | 595.050 ppb           | 5,205,418 cps     | 1.6 %         |
| 58Ni (KED) | 3.095 ppb             | 39,301 cps        | 0.4 %         |
| 59Co (KED) | 1.142 ppb             | 22,282 cps        | 126.0 %       |

| Category    | Concentration average | Intensity average | Intensity RSD |
|-------------|-----------------------|-------------------|---------------|
| 63Cu (KED)  | 7.735 ppb             | 116,850 cps       | 1.5 %         |
| 64Zn (KED)  | 186.128 ppb           | 686,399 cps       | 0.3 %         |
| 69Ga (KED)  | 2.213 ppb             | 10,096 cps        | 3.7 %         |
| 75As (KED)  | 0.819 ppb             | 979 cps           | 3.4 %         |
| 80Se (KED)  | 3.474 ppb             | 1,677 cps         | 3.8 %         |
| 85Rb (KED)  | 1.925 ppb             | 7,954 cps         | 0.4 %         |
| 88Sr (KED)  | 6.483 ppb             | 37,061 cps        | 0.7 %         |
| 107Ag (KED) | 0.097 ppb             | 4,972 cps         | 4.5 %         |
| 114Cd (KED) | 0.425 ppb             | 6,998 cps         | 1.1 %         |
| 133Cs (KED) | 0.118 ppb             | 2,783 cps         | 4.3 %         |
| 138Ba (KED) | 6.275 ppb             | 209,353 cps       | 1.7 %         |
| 139La (KED) | 0.550 ppb             | 36,809 cps        | 2.3 %         |
| 140Ce (KED) | 1.068 ppb             | 97,899 cps        | 3.2 %         |
| 141Pr (KED) | 0.125 ppb             | 11,770 cps        | 9.4 %         |
| 142Nd (KED) | 0.650 ppb             | 25,982 cps        | 2.6 %         |
| 152Sm (KED) | 0.080 ppb             | 3,102 cps         | 3.2 %         |
| 153Eu (KED) | 0.018 ppb             | 1,282 cps         | 1.7 %         |
| 158Gd (KED) | 0.070 ppb             | 3,746 cps         | 7.5 %         |
| 164Dy (KED) | 0.049 ppb             | 2,815 cps         | 0.8 %         |
| 165Ho (KED) | 0.009 ppb             | 1,840 cps         | 4.3 %         |
| 166Er (KED) | 0.025 ppb             | 1,848 cps         | 3.9 %         |
| 169Tm (KED) | 0.003 ppb             | 790 cps           | 6.1 %         |
| 174Yb (KED) | 0.023 ppb             | 1,956 cps         | 12.6 %        |
| 175Lu (KED) | 0.003 ppb             | 386 cps           | 14.3 %        |
| 205Tl (KED) | 0.013 ppb             | 2,384 cps         | 5.5 %         |
| 208Pb (KED) | 1.076 ppb             | 142,906 cps       | 2.1 %         |
| 232Th (KED) | 0.151 ppb             | 36,814 cps        | 0.9 %         |
| 238U (KED)  | 0.042 ppb             | 12,240 cps        | 12.5 %        |

# Comprehensive

8/30/2021 5:35:01 PM

## Sample Summary

Instrument ID: iCAP Q

Analysis index: 13

Analysis name: 268jian

Analysis started at: 8/30/2021 4:55:16 PM

User name: WINDOWS-UPCI4ER\Administrator

| Category    | Concentration average | Concentration RSD |
|-------------|-----------------------|-------------------|
| 9Be (KED)   | 0.031 ppb             | 230.9 %           |
| 11B (KED)   | 3.546 ppb             | 5.1 %             |
| 24Mg (KED)  | 795.895 ppb           | 1.1 %             |
| 27Al (KED)  | 1,166.361 ppb         | 1.3 %             |
| 51V (KED)   | 2.201 ppb             | 3.4 %             |
| 52Cr (KED)  | 7.789 ppb             | 2.2 %             |
| 55Mn (KED)  | 31.251 ppb            | 0.6 %             |
| 56Fe (KED)  | 1,016.488 ppb         | 0.5 %             |
| 58Ni (KED)  | 4.586 ppb             | 2.5 %             |
| 59Co (KED)  | 0.580 ppb             | 16.9 %            |
| 63Cu (KED)  | 6.234 ppb             | 1.9 %             |
| 64Zn (KED)  | 196.513 ppb           | 1.0 %             |
| 69Ga (KED)  | 5.064 ppb             | 1.3 %             |
| 75As (KED)  | 1.123 ppb             | 9.8 %             |
| 80Se (KED)  | 4.403 ppb             | 8.4 %             |
| 85Rb (KED)  | 2.426 ppb             | 3.0 %             |
| 88Sr (KED)  | 10.003 ppb            | 2.7 %             |
| 107Ag (KED) | 0.127 ppb             | 4.1 %             |
| 114Cd (KED) | 0.445 ppb             | 2.4 %             |
| 133Cs (KED) | 0.186 ppb             | 2.3 %             |
| 138Ba (KED) | 14.996 ppb            | 1.6 %             |
| 139La (KED) | 0.846 ppb             | 2.1 %             |
| 140Ce (KED) | 1.693 ppb             | 4.4 %             |
| 141Pr (KED) | 0.192 ppb             | 6.2 %             |
| 142Nd (KED) | 0.961 ppb             | 1.9 %             |
| 152Sm (KED) | 0.128 ppb             | 4.1 %             |
| 153Eu (KED) | 0.028 ppb             | 5.7 %             |
| 158Gd (KED) | 0.116 ppb             | 2.2 %             |
| 164Dy (KED) | 0.082 ppb             | 4.8 %             |
| 165Ho (KED) | 0.015 ppb             | 1.7 %             |
| 166Er (KED) | 0.041 ppb             | 4.3 %             |
| 169Tm (KED) | 0.007 ppb             | 12.3 %            |
| 174Yb (KED) | 0.034 ppb             | 8.0 %             |
| 175Lu (KED) | 0.005 ppb             | 10.0 %            |
| 205Tl (KED) | 0.014 ppb             | 4.4 %             |
| 208Pb (KED) | 1.587 ppb             | 2.8 %             |
| 232Th (KED) | 0.225 ppb             | 3.0 %             |
| 238U (KED)  | 0.059 ppb             | 5.9 %             |

| Category   | Concentration average | Intensity average | Intensity RSD |
|------------|-----------------------|-------------------|---------------|
| 9Be (KED)  | 0.031 ppb             | 4 cps             | 173.2 %       |
| 11B (KED)  | 3.546 ppb             | 262 cps           | 4.1 %         |
| 24Mg (KED) | 795.895 ppb           | 307,696 cps       | 1.1 %         |
| 27Al (KED) | 1,166.361 ppb         | 107,746 cps       | 1.3 %         |
| 51V (KED)  | 2.201 ppb             | 13,579 cps        | 3.4 %         |
| 52Cr (KED) | 7.789 ppb             | 75,801 cps        | 2.2 %         |
| 55Mn (KED) | 31.251 ppb            | 142,172 cps       | 0.6 %         |
| 56Fe (KED) | 1,016.488 ppb         | 8,887,034 cps     | 0.5 %         |
| 58Ni (KED) | 4.586 ppb             | 57,144 cps        | 2.4 %         |
| 59Co (KED) | 0.580 ppb             | 11,321 cps        | 16.9 %        |

| Category    | Concentration average | Intensity average | Intensity RSD |
|-------------|-----------------------|-------------------|---------------|
| 63Cu (KED)  | 6.234 ppb             | 94,445 cps        | 1.8 %         |
| 64Zn (KED)  | 196.513 ppb           | 724,642 cps       | 1.0 %         |
| 69Ga (KED)  | 5.064 ppb             | 22,927 cps        | 1.3 %         |
| 75As (KED)  | 1.123 ppb             | 1,302 cps         | 9.0 %         |
| 80Se (KED)  | 4.403 ppb             | 1,958 cps         | 5.7 %         |
| 85Rb (KED)  | 2.426 ppb             | 10,014 cps        | 3.0 %         |
| 88Sr (KED)  | 10.003 ppb            | 57,139 cps        | 2.7 %         |
| 107Ag (KED) | 0.127 ppb             | 6,267 cps         | 3.6 %         |
| 114Cd (KED) | 0.445 ppb             | 7,322 cps         | 2.3 %         |
| 133Cs (KED) | 0.186 ppb             | 4,323 cps         | 2.2 %         |
| 138Ba (KED) | 14.996 ppb            | 494,566 cps       | 1.6 %         |
| 139La (KED) | 0.846 ppb             | 56,561 cps        | 2.1 %         |
| 140Ce (KED) | 1.693 ppb             | 155,083 cps       | 4.4 %         |
| 141Pr (KED) | 0.192 ppb             | 18,037 cps        | 6.2 %         |
| 142Nd (KED) | 0.961 ppb             | 38,390 cps        | 1.9 %         |
| 152Sm (KED) | 0.128 ppb             | 4,973 cps         | 4.1 %         |
| 153Eu (KED) | 0.028 ppb             | 2,024 cps         | 5.7 %         |
| 158Gd (KED) | 0.116 ppb             | 6,179 cps         | 2.2 %         |
| 164Dy (KED) | 0.082 ppb             | 4,685 cps         | 4.8 %         |
| 165Ho (KED) | 0.015 ppb             | 3,049 cps         | 1.7 %         |
| 166Er (KED) | 0.041 ppb             | 2,974 cps         | 4.2 %         |
| 169Tm (KED) | 0.007 ppb             | 1,561 cps         | 12.3 %        |
| 174Yb (KED) | 0.034 ppb             | 2,967 cps         | 8.0 %         |
| 175Lu (KED) | 0.005 ppb             | 619 cps           | 10.0 %        |
| 205Tl (KED) | 0.014 ppb             | 2,552 cps         | 4.4 %         |
| 208Pb (KED) | 1.587 ppb             | 207,480 cps       | 2.7 %         |
| 232Th (KED) | 0.225 ppb             | 54,612 cps        | 3.0 %         |
| 238U (KED)  | 0.059 ppb             | 16,925 cps        | 5.9 %         |

# Comprehensive

8/30/2021 5:35:01 PM

## Sample Summary

Instrument ID: iCAP Q

Analysis index: 14

Analysis name: 17174jian

Analysis started at: 8/30/2021 4:58:28 PM

User name: WINDOWS-UPCI4ER\Administrator

| Category    | Concentration average | Concentration RSD |
|-------------|-----------------------|-------------------|
| 9Be (KED)   | -0.010 ppb            | 0.0 %             |
| 11B (KED)   | 3.187 ppb             | 10.1 %            |
| 24Mg (KED)  | 317.055 ppb           | 0.7 %             |
| 27Al (KED)  | 425.695 ppb           | 0.9 %             |
| 51V (KED)   | 0.746 ppb             | 3.6 %             |
| 52Cr (KED)  | 3.877 ppb             | 1.0 %             |
| 55Mn (KED)  | 10.298 ppb            | 0.8 %             |
| 56Fe (KED)  | 356.057 ppb           | 0.3 %             |
| 58Ni (KED)  | 1.940 ppb             | 2.3 %             |
| 59Co (KED)  | 0.201 ppb             | 15.6 %            |
| 63Cu (KED)  | 6.707 ppb             | 1.3 %             |
| 64Zn (KED)  | 198.287 ppb           | 0.6 %             |
| 69Ga (KED)  | 1.520 ppb             | 0.6 %             |
| 75As (KED)  | 0.939 ppb             | 4.7 %             |
| 80Se (KED)  | 3.669 ppb             | 5.9 %             |
| 85Rb (KED)  | 1.297 ppb             | 3.4 %             |
| 88Sr (KED)  | 3.722 ppb             | 1.4 %             |
| 107Ag (KED) | 0.161 ppb             | 2.7 %             |
| 114Cd (KED) | 0.469 ppb             | 0.7 %             |
| 133Cs (KED) | 0.090 ppb             | 7.0 %             |
| 138Ba (KED) | 4.459 ppb             | 2.6 %             |
| 139La (KED) | 0.332 ppb             | 4.8 %             |
| 140Ce (KED) | 0.656 ppb             | 1.2 %             |
| 141Pr (KED) | 0.071 ppb             | 1.5 %             |
| 142Nd (KED) | 0.359 ppb             | 3.5 %             |
| 152Sm (KED) | 0.045 ppb             | 3.6 %             |
| 153Eu (KED) | 0.010 ppb             | 13.2 %            |
| 158Gd (KED) | 0.040 ppb             | 3.1 %             |
| 164Dy (KED) | 0.030 ppb             | 5.5 %             |
| 165Ho (KED) | 0.006 ppb             | 7.8 %             |
| 166Er (KED) | 0.018 ppb             | 8.1 %             |
| 169Tm (KED) | 0.002 ppb             | 5.3 %             |
| 174Yb (KED) | 0.013 ppb             | 1.6 %             |
| 175Lu (KED) | 0.002 ppb             | 21.4 %            |
| 205Tl (KED) | 0.010 ppb             | 5.8 %             |
| 208Pb (KED) | 0.967 ppb             | 2.2 %             |
| 232Th (KED) | 0.088 ppb             | 1.6 %             |
| 238U (KED)  | 0.024 ppb             | 2.1 %             |

| Category   | Concentration average | Intensity average | Intensity RSD |
|------------|-----------------------|-------------------|---------------|
| 9Be (KED)  | -0.010 ppb            | 0 cps             |               |
| 11B (KED)  | 3.187 ppb             | 241 cps           | 7.9 %         |
| 24Mg (KED) | 317.055 ppb           | 122,693 cps       | 0.7 %         |
| 27Al (KED) | 425.695 ppb           | 39,390 cps        | 0.9 %         |
| 51V (KED)  | 0.746 ppb             | 4,608 cps         | 3.6 %         |
| 52Cr (KED) | 3.877 ppb             | 37,844 cps        | 0.9 %         |
| 55Mn (KED) | 10.298 ppb            | 47,402 cps        | 0.8 %         |
| 56Fe (KED) | 356.057 ppb           | 3,117,616 cps     | 0.3 %         |
| 58Ni (KED) | 1.940 ppb             | 25,486 cps        | 2.1 %         |
| 59Co (KED) | 0.201 ppb             | 3,935 cps         | 15.5 %        |

| Category    | Concentration average | Intensity average | Intensity RSD |
|-------------|-----------------------|-------------------|---------------|
| 63Cu (KED)  | 6.707 ppb             | 101,511 cps       | 1.3 %         |
| 64Zn (KED)  | 198.287 ppb           | 731,175 cps       | 0.6 %         |
| 69Ga (KED)  | 1.520 ppb             | 6,979 cps         | 0.6 %         |
| 75As (KED)  | 0.939 ppb             | 1,107 cps         | 4.2 %         |
| 80Se (KED)  | 3.669 ppb             | 1,736 cps         | 3.7 %         |
| 85Rb (KED)  | 1.297 ppb             | 5,370 cps         | 3.4 %         |
| 88Sr (KED)  | 3.722 ppb             | 21,310 cps        | 1.4 %         |
| 107Ag (KED) | 0.161 ppb             | 7,766 cps         | 2.5 %         |
| 114Cd (KED) | 0.469 ppb             | 7,710 cps         | 0.7 %         |
| 133Cs (KED) | 0.090 ppb             | 2,149 cps         | 6.7 %         |
| 138Ba (KED) | 4.459 ppb             | 149,945 cps       | 2.5 %         |
| 139La (KED) | 0.332 ppb             | 22,220 cps        | 4.8 %         |
| 140Ce (KED) | 0.656 ppb             | 60,245 cps        | 1.2 %         |
| 141Pr (KED) | 0.071 ppb             | 6,672 cps         | 1.5 %         |
| 142Nd (KED) | 0.359 ppb             | 14,369 cps        | 3.5 %         |
| 152Sm (KED) | 0.045 ppb             | 1,758 cps         | 3.6 %         |
| 153Eu (KED) | 0.010 ppb             | 698 cps           | 13.1 %        |
| 158Gd (KED) | 0.040 ppb             | 2,114 cps         | 3.1 %         |
| 164Dy (KED) | 0.030 ppb             | 1,748 cps         | 5.5 %         |
| 165Ho (KED) | 0.006 ppb             | 1,130 cps         | 7.7 %         |
| 166Er (KED) | 0.018 ppb             | 1,318 cps         | 7.8 %         |
| 169Tm (KED) | 0.002 ppb             | 451 cps           | 5.3 %         |
| 174Yb (KED) | 0.013 ppb             | 1,142 cps         | 1.6 %         |
| 175Lu (KED) | 0.002 ppb             | 273 cps           | 21.3 %        |
| 205Tl (KED) | 0.010 ppb             | 1,901 cps         | 5.8 %         |
| 208Pb (KED) | 0.967 ppb             | 129,159 cps       | 2.1 %         |
| 232Th (KED) | 0.088 ppb             | 21,522 cps        | 1.5 %         |
| 238U (KED)  | 0.024 ppb             | 7,001 cps         | 2.1 %         |

# Comprehensive

8/30/2021 5:35:01 PM

## Sample Summary

Instrument ID: iCAP Q

Analysis index: 15

Analysis name: 17148jian

Analysis started at: 8/30/2021 5:01:39 PM

User name: WINDOWS-UPCI4ER\Administrator

| Category    | Concentration average | Concentration RSD |
|-------------|-----------------------|-------------------|
| 9Be (KED)   | -0.010 ppb            | 0.0 %             |
| 11B (KED)   | 2.640 ppb             | 10.6 %            |
| 24Mg (KED)  | 410.646 ppb           | 2.9 %             |
| 27Al (KED)  | 478.412 ppb           | 2.2 %             |
| 51V (KED)   | 0.887 ppb             | 3.0 %             |
| 52Cr (KED)  | 4.870 ppb             | 2.9 %             |
| 55Mn (KED)  | 11.672 ppb            | 2.8 %             |
| 56Fe (KED)  | 412.579 ppb           | 2.4 %             |
| 58Ni (KED)  | 2.401 ppb             | 1.9 %             |
| 59Co (KED)  | 0.203 ppb             | 2.8 %             |
| 63Cu (KED)  | 8.259 ppb             | 3.2 %             |
| 64Zn (KED)  | 201.300 ppb           | 1.3 %             |
| 69Ga (KED)  | 1.747 ppb             | 5.3 %             |
| 75As (KED)  | 0.739 ppb             | 4.4 %             |
| 80Se (KED)  | 4.300 ppb             | 7.4 %             |
| 85Rb (KED)  | 2.421 ppb             | 2.4 %             |
| 88Sr (KED)  | 4.163 ppb             | 1.8 %             |
| 107Ag (KED) | 0.083 ppb             | 17.5 %            |
| 114Cd (KED) | 0.517 ppb             | 3.7 %             |
| 133Cs (KED) | 0.071 ppb             | 1.0 %             |
| 138Ba (KED) | 5.062 ppb             | 0.3 %             |
| 139La (KED) | 0.343 ppb             | 2.9 %             |
| 140Ce (KED) | 0.671 ppb             | 2.0 %             |
| 141Pr (KED) | 0.072 ppb             | 4.4 %             |
| 142Nd (KED) | 0.382 ppb             | 1.9 %             |
| 152Sm (KED) | 0.049 ppb             | 5.1 %             |
| 153Eu (KED) | 0.010 ppb             | 6.6 %             |
| 158Gd (KED) | 0.044 ppb             | 3.5 %             |
| 164Dy (KED) | 0.034 ppb             | 6.4 %             |
| 165Ho (KED) | 0.006 ppb             | 2.3 %             |
| 166Er (KED) | 0.016 ppb             | 10.9 %            |
| 169Tm (KED) | 0.002 ppb             | 3.5 %             |
| 174Yb (KED) | 0.017 ppb             | 39.5 %            |
| 175Lu (KED) | 0.002 ppb             | 18.1 %            |
| 205Tl (KED) | 0.010 ppb             | 4.5 %             |
| 208Pb (KED) | 0.800 ppb             | 3.4 %             |
| 232Th (KED) | 0.090 ppb             | 5.3 %             |
| 238U (KED)  | 0.025 ppb             | 6.3 %             |

| Category   | Concentration average | Intensity average | Intensity RSD |
|------------|-----------------------|-------------------|---------------|
| 9Be (KED)  | -0.010 ppb            | 0 cps             |               |
| 11B (KED)  | 2.640 ppb             | 209 cps           | 7.9 %         |
| 24Mg (KED) | 410.646 ppb           | 158,852 cps       | 2.9 %         |
| 27Al (KED) | 478.412 ppb           | 44,255 cps        | 2.2 %         |
| 51V (KED)  | 0.887 ppb             | 5,480 cps         | 3.0 %         |
| 52Cr (KED) | 4.870 ppb             | 47,477 cps        | 2.9 %         |
| 55Mn (KED) | 11.672 ppb            | 53,616 cps        | 2.8 %         |
| 56Fe (KED) | 412.579 ppb           | 3,611,387 cps     | 2.4 %         |
| 58Ni (KED) | 2.401 ppb             | 30,997 cps        | 1.7 %         |
| 59Co (KED) | 0.203 ppb             | 3,963 cps         | 2.8 %         |

| Category    | Concentration average | Intensity average | Intensity RSD |
|-------------|-----------------------|-------------------|---------------|
| 63Cu (KED)  | 8.259 ppb             | 124,684 cps       | 3.2 %         |
| 64Zn (KED)  | 201.300 ppb           | 742,269 cps       | 1.3 %         |
| 69Ga (KED)  | 1.747 ppb             | 7,999 cps         | 5.2 %         |
| 75As (KED)  | 0.739 ppb             | 894 cps           | 3.9 %         |
| 80Se (KED)  | 4.300 ppb             | 1,927 cps         | 5.0 %         |
| 85Rb (KED)  | 2.421 ppb             | 9,996 cps         | 2.4 %         |
| 88Sr (KED)  | 4.163 ppb             | 23,828 cps        | 1.8 %         |
| 107Ag (KED) | 0.083 ppb             | 4,336 cps         | 14.6 %        |
| 114Cd (KED) | 0.517 ppb             | 8,492 cps         | 3.6 %         |
| 133Cs (KED) | 0.071 ppb             | 1,722 cps         | 1.0 %         |
| 138Ba (KED) | 5.062 ppb             | 169,667 cps       | 0.3 %         |
| 139La (KED) | 0.343 ppb             | 22,919 cps        | 2.9 %         |
| 140Ce (KED) | 0.671 ppb             | 61,638 cps        | 2.0 %         |
| 141Pr (KED) | 0.072 ppb             | 6,794 cps         | 4.4 %         |
| 142Nd (KED) | 0.382 ppb             | 15,287 cps        | 1.9 %         |
| 152Sm (KED) | 0.049 ppb             | 1,907 cps         | 5.1 %         |
| 153Eu (KED) | 0.010 ppb             | 744 cps           | 6.6 %         |
| 158Gd (KED) | 0.044 ppb             | 2,318 cps         | 3.5 %         |
| 164Dy (KED) | 0.034 ppb             | 1,928 cps         | 6.4 %         |
| 165Ho (KED) | 0.006 ppb             | 1,222 cps         | 2.3 %         |
| 166Er (KED) | 0.016 ppb             | 1,200 cps         | 10.4 %        |
| 169Tm (KED) | 0.002 ppb             | 568 cps           | 3.5 %         |
| 174Yb (KED) | 0.017 ppb             | 1,496 cps         | 39.5 %        |
| 175Lu (KED) | 0.002 ppb             | 317 cps           | 18.0 %        |
| 205Tl (KED) | 0.010 ppb             | 1,845 cps         | 4.4 %         |
| 208Pb (KED) | 0.800 ppb             | 107,997 cps       | 3.2 %         |
| 232Th (KED) | 0.090 ppb             | 22,140 cps        | 5.2 %         |
| 238U (KED)  | 0.025 ppb             | 7,129 cps         | 6.2 %         |

# Comprehensive

8/30/2021 5:35:01 PM

## Sample Summary

Instrument ID: iCAP Q

Analysis index: 16

Analysis name: 18094jian

Analysis started at: 8/30/2021 5:04:48 PM

User name: WINDOWS-UPCI4ER\Administrator

| Category    | Concentration average | Concentration RSD |
|-------------|-----------------------|-------------------|
| 9Be (KED)   | 0.031 ppb             | 57.7 %            |
| 11B (KED)   | 5.960 ppb             | 2.0 %             |
| 24Mg (KED)  | 463.447 ppb           | 1.0 %             |
| 27Al (KED)  | 548.604 ppb           | 2.6 %             |
| 51V (KED)   | 1.023 ppb             | 2.3 %             |
| 52Cr (KED)  | 5.085 ppb             | 1.6 %             |
| 55Mn (KED)  | 13.685 ppb            | 0.5 %             |
| 56Fe (KED)  | 477.414 ppb           | 0.3 %             |
| 58Ni (KED)  | 2.533 ppb             | 1.2 %             |
| 59Co (KED)  | 0.245 ppb             | 1.4 %             |
| 63Cu (KED)  | 10.065 ppb            | 0.9 %             |
| 64Zn (KED)  | 219.408 ppb           | 0.6 %             |
| 69Ga (KED)  | 1.849 ppb             | 4.9 %             |
| 75As (KED)  | 0.819 ppb             | 2.5 %             |
| 80Se (KED)  | 4.374 ppb             | 4.8 %             |
| 85Rb (KED)  | 1.888 ppb             | 2.3 %             |
| 88Sr (KED)  | 4.894 ppb             | 2.4 %             |
| 107Ag (KED) | 0.085 ppb             | 1.1 %             |
| 114Cd (KED) | 0.459 ppb             | 3.4 %             |
| 133Cs (KED) | 0.087 ppb             | 4.6 %             |
| 138Ba (KED) | 5.152 ppb             | 2.6 %             |
| 139La (KED) | 0.444 ppb             | 8.4 %             |
| 140Ce (KED) | 0.840 ppb             | 1.3 %             |
| 141Pr (KED) | 0.094 ppb             | 2.8 %             |
| 142Nd (KED) | 0.485 ppb             | 5.2 %             |
| 152Sm (KED) | 0.061 ppb             | 6.5 %             |
| 153Eu (KED) | 0.013 ppb             | 8.7 %             |
| 158Gd (KED) | 0.056 ppb             | 1.7 %             |
| 164Dy (KED) | 0.036 ppb             | 4.1 %             |
| 165Ho (KED) | 0.007 ppb             | 4.5 %             |
| 166Er (KED) | 0.018 ppb             | 3.1 %             |
| 169Tm (KED) | 0.003 ppb             | 2.2 %             |
| 174Yb (KED) | 0.015 ppb             | 5.1 %             |
| 175Lu (KED) | 0.002 ppb             | 6.6 %             |
| 205Tl (KED) | 0.010 ppb             | 2.4 %             |
| 208Pb (KED) | 1.018 ppb             | 0.4 %             |
| 232Th (KED) | 0.109 ppb             | 1.3 %             |
| 238U (KED)  | 0.034 ppb             | 11.6 %            |

| Category   | Concentration average | Intensity average | Intensity RSD |
|------------|-----------------------|-------------------|---------------|
| 9Be (KED)  | 0.031 ppb             | 4 cps             | 43.3 %        |
| 11B (KED)  | 5.960 ppb             | 404 cps           | 1.7 %         |
| 24Mg (KED) | 463.447 ppb           | 179,253 cps       | 1.0 %         |
| 27Al (KED) | 548.604 ppb           | 50,733 cps        | 2.6 %         |
| 51V (KED)  | 1.023 ppb             | 6,318 cps         | 2.3 %         |
| 52Cr (KED) | 5.085 ppb             | 49,563 cps        | 1.6 %         |
| 55Mn (KED) | 13.685 ppb            | 62,719 cps        | 0.5 %         |
| 56Fe (KED) | 477.414 ppb           | 4,177,769 cps     | 0.3 %         |
| 58Ni (KED) | 2.533 ppb             | 32,581 cps        | 1.1 %         |
| 59Co (KED) | 0.245 ppb             | 4,794 cps         | 1.4 %         |

| Category    | Concentration average | Intensity average | Intensity RSD |
|-------------|-----------------------|-------------------|---------------|
| 63Cu (KED)  | 10.065 ppb            | 151,636 cps       | 0.9 %         |
| 64Zn (KED)  | 219.408 ppb           | 808,953 cps       | 0.6 %         |
| 69Ga (KED)  | 1.849 ppb             | 8,457 cps         | 4.8 %         |
| 75As (KED)  | 0.819 ppb             | 979 cps           | 2.2 %         |
| 80Se (KED)  | 4.374 ppb             | 1,949 cps         | 3.3 %         |
| 85Rb (KED)  | 1.888 ppb             | 7,801 cps         | 2.3 %         |
| 88Sr (KED)  | 4.894 ppb             | 27,995 cps        | 2.4 %         |
| 107Ag (KED) | 0.085 ppb             | 4,444 cps         | 0.9 %         |
| 114Cd (KED) | 0.459 ppb             | 7,556 cps         | 3.4 %         |
| 133Cs (KED) | 0.087 ppb             | 2,082 cps         | 4.4 %         |
| 138Ba (KED) | 5.152 ppb             | 172,622 cps       | 2.6 %         |
| 139La (KED) | 0.444 ppb             | 29,671 cps        | 8.4 %         |
| 140Ce (KED) | 0.840 ppb             | 77,068 cps        | 1.3 %         |
| 141Pr (KED) | 0.094 ppb             | 8,864 cps         | 2.8 %         |
| 142Nd (KED) | 0.485 ppb             | 19,426 cps        | 5.2 %         |
| 152Sm (KED) | 0.061 ppb             | 2,380 cps         | 6.5 %         |
| 153Eu (KED) | 0.013 ppb             | 939 cps           | 8.7 %         |
| 158Gd (KED) | 0.056 ppb             | 2,984 cps         | 1.7 %         |
| 164Dy (KED) | 0.036 ppb             | 2,084 cps         | 4.1 %         |
| 165Ho (KED) | 0.007 ppb             | 1,419 cps         | 4.5 %         |
| 166Er (KED) | 0.018 ppb             | 1,328 cps         | 2.9 %         |
| 169Tm (KED) | 0.003 ppb             | 612 cps           | 2.2 %         |
| 174Yb (KED) | 0.015 ppb             | 1,302 cps         | 5.1 %         |
| 175Lu (KED) | 0.002 ppb             | 289 cps           | 6.6 %         |
| 205Tl (KED) | 0.010 ppb             | 1,736 cps         | 2.4 %         |
| 208Pb (KED) | 1.018 ppb             | 135,559 cps       | 0.4 %         |
| 232Th (KED) | 0.109 ppb             | 26,699 cps        | 1.3 %         |
| 238U (KED)  | 0.034 ppb             | 9,839 cps         | 11.4 %        |

# Comprehensive

8/30/2021 5:35:01 PM

## Sample Summary

Instrument ID: iCAP Q

Analysis index: 17

Analysis name: 17180jian

Analysis started at: 8/30/2021 5:07:53 PM

User name: WINDOWS-UPCI4ER\Administrator

| Category    | Concentration average | Concentration RSD             |
|-------------|-----------------------|-------------------------------|
| 9Be (KED)   | 0.000 ppb             | 1,596,686,889,329,620,000.0 % |
| 11B (KED)   | 3.602 ppb             | 5.0 %                         |
| 24Mg (KED)  | 480.831 ppb           | 1.0 %                         |
| 27Al (KED)  | 651.925 ppb           | 1.8 %                         |
| 51V (KED)   | 1.191 ppb             | 1.6 %                         |
| 52Cr (KED)  | 4.126 ppb             | 31.2 %                        |
| 55Mn (KED)  | 16.052 ppb            | 1.1 %                         |
| 56Fe (KED)  | 513.218 ppb           | 0.5 %                         |
| 58Ni (KED)  | 2.430 ppb             | 2.0 %                         |
| 59Co (KED)  | 0.701 ppb             | 104.5 %                       |
| 63Cu (KED)  | 6.926 ppb             | 1.2 %                         |
| 64Zn (KED)  | 195.222 ppb           | 1.7 %                         |
| 69Ga (KED)  | 2.081 ppb             | 3.1 %                         |
| 75As (KED)  | 0.691 ppb             | 9.5 %                         |
| 80Se (KED)  | 3.764 ppb             | 3.0 %                         |
| 85Rb (KED)  | 1.799 ppb             | 1.6 %                         |
| 88Sr (KED)  | 5.643 ppb             | 2.8 %                         |
| 107Ag (KED) | 0.148 ppb             | 4.6 %                         |
| 114Cd (KED) | 0.429 ppb             | 2.1 %                         |
| 133Cs (KED) | 0.122 ppb             | 3.8 %                         |
| 138Ba (KED) | 5.825 ppb             | 0.2 %                         |
| 139La (KED) | 0.428 ppb             | 0.9 %                         |
| 140Ce (KED) | 0.842 ppb             | 2.2 %                         |
| 141Pr (KED) | 0.093 ppb             | 5.9 %                         |
| 142Nd (KED) | 0.496 ppb             | 5.4 %                         |
| 152Sm (KED) | 0.059 ppb             | 1.2 %                         |
| 153Eu (KED) | 0.014 ppb             | 9.1 %                         |
| 158Gd (KED) | 0.055 ppb             | 3.6 %                         |
| 164Dy (KED) | 0.041 ppb             | 2.2 %                         |
| 165Ho (KED) | 0.008 ppb             | 7.3 %                         |
| 166Er (KED) | 0.019 ppb             | 4.0 %                         |
| 169Tm (KED) | 0.003 ppb             | 10.1 %                        |
| 174Yb (KED) | 0.018 ppb             | 9.9 %                         |
| 175Lu (KED) | 0.004 ppb             | 66.8 %                        |
| 205Tl (KED) | 0.012 ppb             | 4.2 %                         |
| 208Pb (KED) | 1.559 ppb             | 10.9 %                        |
| 232Th (KED) | 0.124 ppb             | 2.9 %                         |
| 238U (KED)  | 0.032 ppb             | 5.7 %                         |

| Category   | Concentration average | Intensity average | Intensity RSD |
|------------|-----------------------|-------------------|---------------|
| 9Be (KED)  | 0.000 ppb             | 1 cps             | 173.2 %       |
| 11B (KED)  | 3.602 ppb             | 266 cps           | 4.0 %         |
| 24Mg (KED) | 480.831 ppb           | 185,969 cps       | 1.0 %         |
| 27Al (KED) | 651.925 ppb           | 60,269 cps        | 1.8 %         |
| 51V (KED)  | 1.191 ppb             | 7,354 cps         | 1.6 %         |
| 52Cr (KED) | 4.126 ppb             | 40,263 cps        | 31.0 %        |
| 55Mn (KED) | 16.052 ppb            | 73,427 cps        | 1.1 %         |
| 56Fe (KED) | 513.218 ppb           | 4,490,548 cps     | 0.5 %         |
| 58Ni (KED) | 2.430 ppb             | 31,347 cps        | 1.9 %         |
| 59Co (KED) | 0.701 ppb             | 13,687 cps        | 104.4 %       |

| Category    | Concentration average | Intensity average | Intensity RSD |
|-------------|-----------------------|-------------------|---------------|
| 63Cu (KED)  | 6.926 ppb             | 104,778 cps       | 1.2 %         |
| 64Zn (KED)  | 195.222 ppb           | 719,888 cps       | 1.7 %         |
| 69Ga (KED)  | 2.081 ppb             | 9,501 cps         | 3.1 %         |
| 75As (KED)  | 0.691 ppb             | 843 cps           | 8.2 %         |
| 80Se (KED)  | 3.764 ppb             | 1,765 cps         | 2.0 %         |
| 85Rb (KED)  | 1.799 ppb             | 7,438 cps         | 1.6 %         |
| 88Sr (KED)  | 5.643 ppb             | 32,266 cps        | 2.8 %         |
| 107Ag (KED) | 0.148 ppb             | 7,183 cps         | 4.2 %         |
| 114Cd (KED) | 0.429 ppb             | 7,061 cps         | 2.1 %         |
| 133Cs (KED) | 0.122 ppb             | 2,868 cps         | 3.6 %         |
| 138Ba (KED) | 5.825 ppb             | 194,632 cps       | 0.2 %         |
| 139La (KED) | 0.428 ppb             | 28,622 cps        | 0.9 %         |
| 140Ce (KED) | 0.842 ppb             | 77,231 cps        | 2.2 %         |
| 141Pr (KED) | 0.093 ppb             | 8,684 cps         | 5.9 %         |
| 142Nd (KED) | 0.496 ppb             | 19,840 cps        | 5.4 %         |
| 152Sm (KED) | 0.059 ppb             | 2,312 cps         | 1.2 %         |
| 153Eu (KED) | 0.014 ppb             | 981 cps           | 9.1 %         |
| 158Gd (KED) | 0.055 ppb             | 2,926 cps         | 3.6 %         |
| 164Dy (KED) | 0.041 ppb             | 2,370 cps         | 2.2 %         |
| 165Ho (KED) | 0.008 ppb             | 1,598 cps         | 7.2 %         |
| 166Er (KED) | 0.019 ppb             | 1,423 cps         | 3.9 %         |
| 169Tm (KED) | 0.003 ppb             | 634 cps           | 10.1 %        |
| 174Yb (KED) | 0.018 ppb             | 1,520 cps         | 9.9 %         |
| 175Lu (KED) | 0.004 ppb             | 563 cps           | 66.7 %        |
| 205Tl (KED) | 0.012 ppb             | 2,237 cps         | 4.2 %         |
| 208Pb (KED) | 1.559 ppb             | 203,929 cps       | 10.5 %        |
| 232Th (KED) | 0.124 ppb             | 30,276 cps        | 2.8 %         |
| 238U (KED)  | 0.032 ppb             | 9,319 cps         | 5.6 %         |

# Comprehensive

8/30/2021 5:35:01 PM

## Sample Summary

Instrument ID: iCAP Q

Analysis index: 18

Analysis name: 17186jian

Analysis started at: 8/30/2021 5:11:33 PM

User name: WINDOWS-UPCI4ER\Administrator

| Category    | Concentration average | Concentration RSD |
|-------------|-----------------------|-------------------|
| 9Be (KED)   | 0.031 ppb             | 152.8 %           |
| 11B (KED)   | 2.584 ppb             | 12.1 %            |
| 24Mg (KED)  | 314.568 ppb           | 1.3 %             |
| 27Al (KED)  | 419.078 ppb           | 2.8 %             |
| 51V (KED)   | 0.801 ppb             | 6.1 %             |
| 52Cr (KED)  | 4.071 ppb             | 2.9 %             |
| 55Mn (KED)  | 9.749 ppb             | 2.1 %             |
| 56Fe (KED)  | 371.267 ppb           | 0.3 %             |
| 58Ni (KED)  | 1.730 ppb             | 1.2 %             |
| 59Co (KED)  | 0.186 ppb             | 3.7 %             |
| 63Cu (KED)  | 7.710 ppb             | 2.0 %             |
| 64Zn (KED)  | 195.099 ppb           | 0.7 %             |
| 69Ga (KED)  | 1.320 ppb             | 1.7 %             |
| 75As (KED)  | 0.811 ppb             | 7.7 %             |
| 80Se (KED)  | 3.228 ppb             | 10.0 %            |
| 85Rb (KED)  | 1.360 ppb             | 3.5 %             |
| 88Sr (KED)  | 3.415 ppb             | 2.0 %             |
| 107Ag (KED) | 0.064 ppb             | 4.4 %             |
| 114Cd (KED) | 0.367 ppb             | 1.6 %             |
| 133Cs (KED) | 0.071 ppb             | 4.4 %             |
| 138Ba (KED) | 4.112 ppb             | 0.8 %             |
| 139La (KED) | 0.357 ppb             | 1.3 %             |
| 140Ce (KED) | 0.715 ppb             | 1.9 %             |
| 141Pr (KED) | 0.081 ppb             | 3.0 %             |
| 142Nd (KED) | 0.410 ppb             | 4.2 %             |
| 152Sm (KED) | 0.052 ppb             | 3.6 %             |
| 153Eu (KED) | 0.012 ppb             | 10.2 %            |
| 158Gd (KED) | 0.047 ppb             | 5.1 %             |
| 164Dy (KED) | 0.032 ppb             | 4.6 %             |
| 165Ho (KED) | 0.006 ppb             | 4.9 %             |
| 166Er (KED) | 0.016 ppb             | 2.1 %             |
| 169Tm (KED) | 0.002 ppb             | 5.8 %             |
| 174Yb (KED) | 0.013 ppb             | 2.5 %             |
| 175Lu (KED) | 0.002 ppb             | 32.3 %            |
| 205Tl (KED) | 0.007 ppb             | 3.6 %             |
| 208Pb (KED) | 0.646 ppb             | 1.1 %             |
| 232Th (KED) | 0.093 ppb             | 3.1 %             |
| 238U (KED)  | 0.023 ppb             | 5.2 %             |

| Category   | Concentration average | Intensity average | Intensity RSD |
|------------|-----------------------|-------------------|---------------|
| 9Be (KED)  | 0.031 ppb             | 4 cps             | 114.6 %       |
| 11B (KED)  | 2.584 ppb             | 206 cps           | 8.9 %         |
| 24Mg (KED) | 314.568 ppb           | 121,732 cps       | 1.3 %         |
| 27Al (KED) | 419.078 ppb           | 38,779 cps        | 2.8 %         |
| 51V (KED)  | 0.801 ppb             | 4,951 cps         | 6.0 %         |
| 52Cr (KED) | 4.071 ppb             | 39,733 cps        | 2.9 %         |
| 55Mn (KED) | 9.749 ppb             | 44,919 cps        | 2.0 %         |
| 56Fe (KED) | 371.267 ppb           | 3,250,489 cps     | 0.3 %         |
| 58Ni (KED) | 1.730 ppb             | 22,969 cps        | 1.1 %         |
| 59Co (KED) | 0.186 ppb             | 3,637 cps         | 3.7 %         |

| Category    | Concentration average | Intensity average | Intensity RSD |
|-------------|-----------------------|-------------------|---------------|
| 63Cu (KED)  | 7.710 ppb             | 116,486 cps       | 2.0 %         |
| 64Zn (KED)  | 195.099 ppb           | 719,437 cps       | 0.7 %         |
| 69Ga (KED)  | 1.320 ppb             | 6,078 cps         | 1.7 %         |
| 75As (KED)  | 0.811 ppb             | 971 cps           | 6.8 %         |
| 80Se (KED)  | 3.228 ppb             | 1,602 cps         | 6.1 %         |
| 85Rb (KED)  | 1.360 ppb             | 5,630 cps         | 3.5 %         |
| 88Sr (KED)  | 3.415 ppb             | 19,556 cps        | 2.0 %         |
| 107Ag (KED) | 0.064 ppb             | 3,533 cps         | 3.5 %         |
| 114Cd (KED) | 0.367 ppb             | 6,068 cps         | 1.5 %         |
| 133Cs (KED) | 0.071 ppb             | 1,713 cps         | 4.1 %         |
| 138Ba (KED) | 4.112 ppb             | 138,604 cps       | 0.8 %         |
| 139La (KED) | 0.357 ppb             | 23,875 cps        | 1.3 %         |
| 140Ce (KED) | 0.715 ppb             | 65,657 cps        | 1.9 %         |
| 141Pr (KED) | 0.081 ppb             | 7,608 cps         | 3.0 %         |
| 142Nd (KED) | 0.410 ppb             | 16,429 cps        | 4.2 %         |
| 152Sm (KED) | 0.052 ppb             | 2,044 cps         | 3.6 %         |
| 153Eu (KED) | 0.012 ppb             | 827 cps           | 10.1 %        |
| 158Gd (KED) | 0.047 ppb             | 2,506 cps         | 5.1 %         |
| 164Dy (KED) | 0.032 ppb             | 1,843 cps         | 4.6 %         |
| 165Ho (KED) | 0.006 ppb             | 1,232 cps         | 4.9 %         |
| 166Er (KED) | 0.016 ppb             | 1,182 cps         | 2.0 %         |
| 169Tm (KED) | 0.002 ppb             | 567 cps           | 5.8 %         |
| 174Yb (KED) | 0.013 ppb             | 1,131 cps         | 2.5 %         |
| 175Lu (KED) | 0.002 ppb             | 259 cps           | 32.1 %        |
| 205Tl (KED) | 0.007 ppb             | 1,339 cps         | 3.6 %         |
| 208Pb (KED) | 0.646 ppb             | 88,650 cps        | 1.0 %         |
| 232Th (KED) | 0.093 ppb             | 22,830 cps        | 3.0 %         |
| 238U (KED)  | 0.023 ppb             | 6,790 cps         | 5.1 %         |

# Comprehensive

8/30/2021 5:35:01 PM

## Sample Summary

Instrument ID: iCAP Q

Analysis index: 19

Analysis name: 17210jian

Analysis started at: 8/30/2021 5:14:51 PM

User name: WINDOWS-UPCI4ER\Administrator

| Category    | Concentration average | Concentration RSD |
|-------------|-----------------------|-------------------|
| 9Be (KED)   | 0.031 ppb             | 115.5 %           |
| 11B (KED)   | 2.414 ppb             | 9.5 %             |
| 24Mg (KED)  | 357.811 ppb           | 1.3 %             |
| 27Al (KED)  | 416.107 ppb           | 1.0 %             |
| 51V (KED)   | 0.773 ppb             | 1.5 %             |
| 52Cr (KED)  | 3.707 ppb             | 3.4 %             |
| 55Mn (KED)  | 10.407 ppb            | 0.4 %             |
| 56Fe (KED)  | 369.822 ppb           | 1.5 %             |
| 58Ni (KED)  | 1.854 ppb             | 0.5 %             |
| 59Co (KED)  | 3.347 ppb             | 161.8 %           |
| 63Cu (KED)  | 5.942 ppb             | 0.7 %             |
| 64Zn (KED)  | 197.395 ppb           | 1.0 %             |
| 69Ga (KED)  | 1.352 ppb             | 1.9 %             |
| 75As (KED)  | 0.883 ppb             | 1.2 %             |
| 80Se (KED)  | 3.614 ppb             | 11.9 %            |
| 85Rb (KED)  | 1.508 ppb             | 4.7 %             |
| 88Sr (KED)  | 4.005 ppb             | 1.4 %             |
| 107Ag (KED) | 0.062 ppb             | 5.6 %             |
| 114Cd (KED) | 0.389 ppb             | 1.6 %             |
| 133Cs (KED) | 0.067 ppb             | 1.8 %             |
| 138Ba (KED) | 3.994 ppb             | 0.3 %             |
| 139La (KED) | 0.303 ppb             | 1.6 %             |
| 140Ce (KED) | 0.586 ppb             | 3.6 %             |
| 141Pr (KED) | 0.071 ppb             | 1.3 %             |
| 142Nd (KED) | 0.361 ppb             | 1.6 %             |
| 152Sm (KED) | 0.045 ppb             | 6.2 %             |
| 153Eu (KED) | 0.010 ppb             | 6.1 %             |
| 158Gd (KED) | 0.040 ppb             | 2.8 %             |
| 164Dy (KED) | 0.030 ppb             | 1.5 %             |
| 165Ho (KED) | 0.006 ppb             | 13.6 %            |
| 166Er (KED) | 0.014 ppb             | 7.1 %             |
| 169Tm (KED) | 0.002 ppb             | 14.2 %            |
| 174Yb (KED) | 0.012 ppb             | 6.1 %             |
| 175Lu (KED) | 0.002 ppb             | 8.8 %             |
| 205Tl (KED) | 0.008 ppb             | 2.8 %             |
| 208Pb (KED) | 1.914 ppb             | 0.8 %             |
| 232Th (KED) | 0.086 ppb             | 3.2 %             |
| 238U (KED)  | 0.025 ppb             | 7.3 %             |

| Category   | Concentration average | Intensity average | Intensity RSD |
|------------|-----------------------|-------------------|---------------|
| 9Be (KED)  | 0.031 ppb             | 4 cps             | 86.6 %        |
| 11B (KED)  | 2.414 ppb             | 196 cps           | 6.9 %         |
| 24Mg (KED) | 357.811 ppb           | 138,439 cps       | 1.3 %         |
| 27Al (KED) | 416.107 ppb           | 38,505 cps        | 1.0 %         |
| 51V (KED)  | 0.773 ppb             | 4,774 cps         | 1.5 %         |
| 52Cr (KED) | 3.707 ppb             | 36,199 cps        | 3.4 %         |
| 55Mn (KED) | 10.407 ppb            | 47,894 cps        | 0.4 %         |
| 56Fe (KED) | 369.822 ppb           | 3,237,870 cps     | 1.5 %         |
| 58Ni (KED) | 1.854 ppb             | 24,456 cps        | 0.5 %         |
| 59Co (KED) | 3.347 ppb             | 65,294 cps        | 161.7 %       |

| Category    | Concentration average | Intensity average | Intensity RSD |
|-------------|-----------------------|-------------------|---------------|
| 63Cu (KED)  | 5.942 ppb             | 90,091 cps        | 0.7 %         |
| 64Zn (KED)  | 197.395 ppb           | 727,889 cps       | 1.0 %         |
| 69Ga (KED)  | 1.352 ppb             | 6,220 cps         | 1.8 %         |
| 75As (KED)  | 0.883 ppb             | 1,047 cps         | 1.1 %         |
| 80Se (KED)  | 3.614 ppb             | 1,719 cps         | 7.5 %         |
| 85Rb (KED)  | 1.508 ppb             | 6,239 cps         | 4.7 %         |
| 88Sr (KED)  | 4.005 ppb             | 22,926 cps        | 1.4 %         |
| 107Ag (KED) | 0.062 ppb             | 3,419 cps         | 4.4 %         |
| 114Cd (KED) | 0.389 ppb             | 6,422 cps         | 1.6 %         |
| 133Cs (KED) | 0.067 ppb             | 1,621 cps         | 1.7 %         |
| 138Ba (KED) | 3.994 ppb             | 134,723 cps       | 0.3 %         |
| 139La (KED) | 0.303 ppb             | 20,254 cps        | 1.6 %         |
| 140Ce (KED) | 0.586 ppb             | 53,830 cps        | 3.6 %         |
| 141Pr (KED) | 0.071 ppb             | 6,642 cps         | 1.3 %         |
| 142Nd (KED) | 0.361 ppb             | 14,453 cps        | 1.6 %         |
| 152Sm (KED) | 0.045 ppb             | 1,773 cps         | 6.2 %         |
| 153Eu (KED) | 0.010 ppb             | 693 cps           | 6.0 %         |
| 158Gd (KED) | 0.040 ppb             | 2,137 cps         | 2.8 %         |
| 164Dy (KED) | 0.030 ppb             | 1,706 cps         | 1.5 %         |
| 165Ho (KED) | 0.006 ppb             | 1,222 cps         | 13.5 %        |
| 166Er (KED) | 0.014 ppb             | 1,050 cps         | 6.8 %         |
| 169Tm (KED) | 0.002 ppb             | 461 cps           | 14.2 %        |
| 174Yb (KED) | 0.012 ppb             | 1,063 cps         | 6.1 %         |
| 175Lu (KED) | 0.002 ppb             | 248 cps           | 8.8 %         |
| 205Tl (KED) | 0.008 ppb             | 1,493 cps         | 2.7 %         |
| 208Pb (KED) | 1.914 ppb             | 248,787 cps       | 0.8 %         |
| 232Th (KED) | 0.086 ppb             | 21,111 cps        | 3.2 %         |
| 238U (KED)  | 0.025 ppb             | 7,259 cps         | 7.2 %         |

# Comprehensive

8/30/2021 5:35:01 PM

## Sample Summary

Instrument ID: iCAP Q

Analysis index: 20

Analysis name: 17013jian

Analysis started at: 8/30/2021 5:18:00 PM

User name: WINDOWS-UPCI4ER\Administrator

| Category    | Concentration average | Concentration RSD |
|-------------|-----------------------|-------------------|
| 9Be (KED)   | 0.010 ppb             | 173.2 %           |
| 11B (KED)   | 3.470 ppb             | 16.3 %            |
| 24Mg (KED)  | 465.501 ppb           | 0.3 %             |
| 27Al (KED)  | 577.485 ppb           | 1.7 %             |
| 51V (KED)   | 1.050 ppb             | 2.1 %             |
| 52Cr (KED)  | 4.402 ppb             | 0.6 %             |
| 55Mn (KED)  | 15.889 ppb            | 2.0 %             |
| 56Fe (KED)  | 485.983 ppb           | 0.8 %             |
| 58Ni (KED)  | 2.679 ppb             | 2.2 %             |
| 59Co (KED)  | 0.267 ppb             | 15.1 %            |
| 63Cu (KED)  | 4.353 ppb             | 1.9 %             |
| 64Zn (KED)  | 224.252 ppb           | 0.5 %             |
| 69Ga (KED)  | 1.841 ppb             | 2.6 %             |
| 75As (KED)  | 0.654 ppb             | 14.4 %            |
| 80Se (KED)  | 4.565 ppb             | 3.2 %             |
| 85Rb (KED)  | 2.429 ppb             | 0.7 %             |
| 88Sr (KED)  | 6.031 ppb             | 2.3 %             |
| 107Ag (KED) | 0.062 ppb             | 4.6 %             |
| 114Cd (KED) | 0.431 ppb             | 2.0 %             |
| 133Cs (KED) | 0.096 ppb             | 2.5 %             |
| 138Ba (KED) | 5.466 ppb             | 2.1 %             |
| 139La (KED) | 0.415 ppb             | 1.6 %             |
| 140Ce (KED) | 0.836 ppb             | 1.0 %             |
| 141Pr (KED) | 0.090 ppb             | 2.2 %             |
| 142Nd (KED) | 0.486 ppb             | 3.9 %             |
| 152Sm (KED) | 0.061 ppb             | 2.6 %             |
| 153Eu (KED) | 0.012 ppb             | 2.7 %             |
| 158Gd (KED) | 0.054 ppb             | 1.3 %             |
| 164Dy (KED) | 0.040 ppb             | 2.0 %             |
| 165Ho (KED) | 0.008 ppb             | 7.6 %             |
| 166Er (KED) | 0.019 ppb             | 6.5 %             |
| 169Tm (KED) | 0.003 ppb             | 4.5 %             |
| 174Yb (KED) | 0.015 ppb             | 5.9 %             |
| 175Lu (KED) | 0.002 ppb             | 13.2 %            |
| 205Tl (KED) | 0.010 ppb             | 12.0 %            |
| 208Pb (KED) | 0.808 ppb             | 3.0 %             |
| 232Th (KED) | 0.109 ppb             | 4.2 %             |
| 238U (KED)  | 0.033 ppb             | 10.3 %            |

| Category   | Concentration average | Intensity average | Intensity RSD |
|------------|-----------------------|-------------------|---------------|
| 9Be (KED)  | 0.010 ppb             | 2 cps             | 86.6 %        |
| 11B (KED)  | 3.470 ppb             | 258 cps           | 13.0 %        |
| 24Mg (KED) | 465.501 ppb           | 180,046 cps       | 0.3 %         |
| 27Al (KED) | 577.485 ppb           | 53,399 cps        | 1.7 %         |
| 51V (KED)  | 1.050 ppb             | 6,481 cps         | 2.1 %         |
| 52Cr (KED) | 4.402 ppb             | 42,945 cps        | 0.6 %         |
| 55Mn (KED) | 15.889 ppb            | 72,689 cps        | 1.9 %         |
| 56Fe (KED) | 485.983 ppb           | 4,252,633 cps     | 0.8 %         |
| 58Ni (KED) | 2.679 ppb             | 34,327 cps        | 2.0 %         |
| 59Co (KED) | 0.267 ppb             | 5,214 cps         | 15.1 %        |

| Category    | Concentration average | Intensity average | Intensity RSD |
|-------------|-----------------------|-------------------|---------------|
| 63Cu (KED)  | 4.353 ppb             | 66,365 cps        | 1.8 %         |
| 64Zn (KED)  | 224.252 ppb           | 826,790 cps       | 0.5 %         |
| 69Ga (KED)  | 1.841 ppb             | 8,424 cps         | 2.5 %         |
| 75As (KED)  | 0.654 ppb             | 804 cps           | 12.4 %        |
| 80Se (KED)  | 4.565 ppb             | 2,007 cps         | 2.2 %         |
| 85Rb (KED)  | 2.429 ppb             | 10,028 cps        | 0.7 %         |
| 88Sr (KED)  | 6.031 ppb             | 34,482 cps        | 2.3 %         |
| 107Ag (KED) | 0.062 ppb             | 3,443 cps         | 3.6 %         |
| 114Cd (KED) | 0.431 ppb             | 7,094 cps         | 2.0 %         |
| 133Cs (KED) | 0.096 ppb             | 2,287 cps         | 2.4 %         |
| 138Ba (KED) | 5.466 ppb             | 182,888 cps       | 2.0 %         |
| 139La (KED) | 0.415 ppb             | 27,783 cps        | 1.6 %         |
| 140Ce (KED) | 0.836 ppb             | 76,684 cps        | 0.9 %         |
| 141Pr (KED) | 0.090 ppb             | 8,458 cps         | 2.2 %         |
| 142Nd (KED) | 0.486 ppb             | 19,436 cps        | 3.9 %         |
| 152Sm (KED) | 0.061 ppb             | 2,367 cps         | 2.6 %         |
| 153Eu (KED) | 0.012 ppb             | 888 cps           | 2.7 %         |
| 158Gd (KED) | 0.054 ppb             | 2,848 cps         | 1.3 %         |
| 164Dy (KED) | 0.040 ppb             | 2,287 cps         | 2.0 %         |
| 165Ho (KED) | 0.008 ppb             | 1,523 cps         | 7.6 %         |
| 166Er (KED) | 0.019 ppb             | 1,443 cps         | 6.3 %         |
| 169Tm (KED) | 0.003 ppb             | 671 cps           | 4.5 %         |
| 174Yb (KED) | 0.015 ppb             | 1,298 cps         | 5.9 %         |
| 175Lu (KED) | 0.002 ppb             | 294 cps           | 13.1 %        |
| 205Tl (KED) | 0.010 ppb             | 1,832 cps         | 11.9 %        |
| 208Pb (KED) | 0.808 ppb             | 109,054 cps       | 2.8 %         |
| 232Th (KED) | 0.109 ppb             | 26,798 cps        | 4.1 %         |
| 238U (KED)  | 0.033 ppb             | 9,652 cps         | 10.2 %        |

# Comprehensive

8/30/2021 5:35:01 PM

## Sample Summary

Instrument ID: iCAP Q

Analysis index: 21

Analysis name: 17011jian

Analysis started at: 8/30/2021 5:21:26 PM

User name: WINDOWS-UPCI4ER\Administrator

| Category    | Concentration average | Concentration RSD |
|-------------|-----------------------|-------------------|
| 9Be (KED)   | 0.021 ppb             | 259.8 %           |
| 11B (KED)   | 6.318 ppb             | 15.8 %            |
| 24Mg (KED)  | 557.197 ppb           | 1.1 %             |
| 27Al (KED)  | 486.749 ppb           | 2.0 %             |
| 51V (KED)   | 0.991 ppb             | 1.9 %             |
| 52Cr (KED)  | 4.146 ppb             | 1.3 %             |
| 55Mn (KED)  | 13.846 ppb            | 1.8 %             |
| 56Fe (KED)  | 443.783 ppb           | 0.3 %             |
| 58Ni (KED)  | 2.512 ppb             | 0.4 %             |
| 59Co (KED)  | 0.775 ppb             | 123.9 %           |
| 63Cu (KED)  | 7.759 ppb             | 0.3 %             |
| 64Zn (KED)  | 203.391 ppb           | 0.9 %             |
| 69Ga (KED)  | 1.558 ppb             | 1.1 %             |
| 75As (KED)  | 0.654 ppb             | 0.7 %             |
| 80Se (KED)  | 5.027 ppb             | 3.9 %             |
| 85Rb (KED)  | 1.276 ppb             | 2.5 %             |
| 88Sr (KED)  | 6.666 ppb             | 0.7 %             |
| 107Ag (KED) | 0.252 ppb             | 1.7 %             |
| 114Cd (KED) | 0.534 ppb             | 6.0 %             |
| 133Cs (KED) | 0.083 ppb             | 5.1 %             |
| 138Ba (KED) | 4.756 ppb             | 0.9 %             |
| 139La (KED) | 0.360 ppb             | 1.9 %             |
| 140Ce (KED) | 0.759 ppb             | 3.8 %             |
| 141Pr (KED) | 0.084 ppb             | 1.6 %             |
| 142Nd (KED) | 0.434 ppb             | 1.2 %             |
| 152Sm (KED) | 0.055 ppb             | 5.2 %             |
| 153Eu (KED) | 0.012 ppb             | 3.4 %             |
| 158Gd (KED) | 0.059 ppb             | 16.4 %            |
| 164Dy (KED) | 0.039 ppb             | 3.5 %             |
| 165Ho (KED) | 0.007 ppb             | 9.9 %             |
| 166Er (KED) | 0.021 ppb             | 17.8 %            |
| 169Tm (KED) | 0.002 ppb             | 7.1 %             |
| 174Yb (KED) | 0.019 ppb             | 8.8 %             |
| 175Lu (KED) | 0.003 ppb             | 42.4 %            |
| 205Tl (KED) | 0.009 ppb             | 6.6 %             |
| 208Pb (KED) | 1.018 ppb             | 2.1 %             |
| 232Th (KED) | 0.103 ppb             | 0.6 %             |
| 238U (KED)  | 0.075 ppb             | 2.5 %             |

| Category   | Concentration average | Intensity average | Intensity RSD |
|------------|-----------------------|-------------------|---------------|
| 9Be (KED)  | 0.021 ppb             | 3 cps             | 173.2 %       |
| 11B (KED)  | 6.318 ppb             | 426 cps           | 13.8 %        |
| 24Mg (KED) | 557.197 ppb           | 215,473 cps       | 1.1 %         |
| 27Al (KED) | 486.749 ppb           | 45,025 cps        | 2.0 %         |
| 51V (KED)  | 0.991 ppb             | 6,122 cps         | 1.9 %         |
| 52Cr (KED) | 4.146 ppb             | 40,453 cps        | 1.3 %         |
| 55Mn (KED) | 13.846 ppb            | 63,451 cps        | 1.8 %         |
| 56Fe (KED) | 443.783 ppb           | 3,883,979 cps     | 0.3 %         |
| 58Ni (KED) | 2.512 ppb             | 32,324 cps        | 0.4 %         |
| 59Co (KED) | 0.775 ppb             | 15,126 cps        | 123.8 %       |

| Category    | Concentration average | Intensity average | Intensity RSD |
|-------------|-----------------------|-------------------|---------------|
| 63Cu (KED)  | 7.759 ppb             | 117,214 cps       | 0.2 %         |
| 64Zn (KED)  | 203.391 ppb           | 749,970 cps       | 0.9 %         |
| 69Ga (KED)  | 1.558 ppb             | 7,148 cps         | 1.1 %         |
| 75As (KED)  | 0.654 ppb             | 804 cps           | 0.6 %         |
| 80Se (KED)  | 5.027 ppb             | 2,147 cps         | 2.7 %         |
| 85Rb (KED)  | 1.276 ppb             | 5,283 cps         | 2.5 %         |
| 88Sr (KED)  | 6.666 ppb             | 38,102 cps        | 0.7 %         |
| 107Ag (KED) | 0.252 ppb             | 11,748 cps        | 1.6 %         |
| 114Cd (KED) | 0.534 ppb             | 8,763 cps         | 5.9 %         |
| 133Cs (KED) | 0.083 ppb             | 1,995 cps         | 4.8 %         |
| 138Ba (KED) | 4.756 ppb             | 159,652 cps       | 0.9 %         |
| 139La (KED) | 0.360 ppb             | 24,096 cps        | 1.9 %         |
| 140Ce (KED) | 0.759 ppb             | 69,646 cps        | 3.8 %         |
| 141Pr (KED) | 0.084 ppb             | 7,923 cps         | 1.6 %         |
| 142Nd (KED) | 0.434 ppb             | 17,375 cps        | 1.2 %         |
| 152Sm (KED) | 0.055 ppb             | 2,144 cps         | 5.1 %         |
| 153Eu (KED) | 0.012 ppb             | 893 cps           | 3.4 %         |
| 158Gd (KED) | 0.059 ppb             | 3,140 cps         | 16.4 %        |
| 164Dy (KED) | 0.039 ppb             | 2,246 cps         | 3.5 %         |
| 165Ho (KED) | 0.007 ppb             | 1,388 cps         | 9.9 %         |
| 166Er (KED) | 0.021 ppb             | 1,533 cps         | 17.1 %        |
| 169Tm (KED) | 0.002 ppb             | 589 cps           | 7.1 %         |
| 174Yb (KED) | 0.019 ppb             | 1,617 cps         | 8.8 %         |
| 175Lu (KED) | 0.003 ppb             | 319 cps           | 42.2 %        |
| 205Tl (KED) | 0.009 ppb             | 1,565 cps         | 6.5 %         |
| 208Pb (KED) | 1.018 ppb             | 135,545 cps       | 1.9 %         |
| 232Th (KED) | 0.103 ppb             | 25,179 cps        | 0.6 %         |
| 238U (KED)  | 0.075 ppb             | 21,459 cps        | 2.5 %         |

# Comprehensive

8/30/2021 5:35:01 PM

## Sample Summary

Instrument ID: iCAP Q

Analysis index: 22

Analysis name: 18120jian

Analysis started at: 8/30/2021 5:24:33 PM

User name: WINDOWS-UPCI4ER\Administrator

| Category    | Concentration average | Concentration RSD |
|-------------|-----------------------|-------------------|
| 9Be (KED)   | 0.010 ppb             | 173.2 %           |
| 11B (KED)   | 6.130 ppb             | 9.8 %             |
| 24Mg (KED)  | 442.598 ppb           | 0.8 %             |
| 27Al (KED)  | 562.989 ppb           | 0.5 %             |
| 51V (KED)   | 1.066 ppb             | 4.7 %             |
| 52Cr (KED)  | 4.332 ppb             | 2.3 %             |
| 55Mn (KED)  | 14.281 ppb            | 2.4 %             |
| 56Fe (KED)  | 500.339 ppb           | 0.6 %             |
| 58Ni (KED)  | 2.342 ppb             | 1.7 %             |
| 59Co (KED)  | 0.292 ppb             | 21.9 %            |
| 63Cu (KED)  | 10.198 ppb            | 0.3 %             |
| 64Zn (KED)  | 204.695 ppb           | 1.3 %             |
| 69Ga (KED)  | 1.636 ppb             | 1.3 %             |
| 75As (KED)  | 0.831 ppb             | 7.0 %             |
| 80Se (KED)  | 2.930 ppb             | 8.6 %             |
| 85Rb (KED)  | 1.873 ppb             | 0.7 %             |
| 88Sr (KED)  | 5.159 ppb             | 1.2 %             |
| 107Ag (KED) | 0.070 ppb             | 2.3 %             |
| 114Cd (KED) | 0.272 ppb             | 3.3 %             |
| 133Cs (KED) | 0.095 ppb             | 8.6 %             |
| 138Ba (KED) | 5.026 ppb             | 0.8 %             |
| 139La (KED) | 0.419 ppb             | 1.8 %             |
| 140Ce (KED) | 0.830 ppb             | 1.9 %             |
| 141Pr (KED) | 0.094 ppb             | 4.4 %             |
| 142Nd (KED) | 0.489 ppb             | 2.0 %             |
| 152Sm (KED) | 0.059 ppb             | 5.1 %             |
| 153Eu (KED) | 0.013 ppb             | 5.3 %             |
| 158Gd (KED) | 0.058 ppb             | 4.5 %             |
| 164Dy (KED) | 0.043 ppb             | 6.7 %             |
| 165Ho (KED) | 0.008 ppb             | 2.8 %             |
| 166Er (KED) | 0.020 ppb             | 2.8 %             |
| 169Tm (KED) | 0.003 ppb             | 9.5 %             |
| 174Yb (KED) | 0.017 ppb             | 4.2 %             |
| 175Lu (KED) | 0.003 ppb             | 13.4 %            |
| 205Tl (KED) | 0.011 ppb             | 6.5 %             |
| 208Pb (KED) | 0.984 ppb             | 1.1 %             |
| 232Th (KED) | 0.115 ppb             | 1.2 %             |
| 238U (KED)  | 0.031 ppb             | 1.1 %             |

| Category   | Concentration average | Intensity average | Intensity RSD |
|------------|-----------------------|-------------------|---------------|
| 9Be (KED)  | 0.010 ppb             | 2 cps             | 86.6 %        |
| 11B (KED)  | 6.130 ppb             | 414 cps           | 8.5 %         |
| 24Mg (KED) | 442.598 ppb           | 171,197 cps       | 0.8 %         |
| 27Al (KED) | 562.989 ppb           | 52,061 cps        | 0.5 %         |
| 51V (KED)  | 1.066 ppb             | 6,581 cps         | 4.7 %         |
| 52Cr (KED) | 4.332 ppb             | 42,262 cps        | 2.3 %         |
| 55Mn (KED) | 14.281 ppb            | 65,414 cps        | 2.4 %         |
| 56Fe (KED) | 500.339 ppb           | 4,378,040 cps     | 0.6 %         |
| 58Ni (KED) | 2.342 ppb             | 30,295 cps        | 1.5 %         |
| 59Co (KED) | 0.292 ppb             | 5,716 cps         | 21.9 %        |

| Category    | Concentration average | Intensity average | Intensity RSD |
|-------------|-----------------------|-------------------|---------------|
| 63Cu (KED)  | 10.198 ppb            | 153,628 cps       | 0.3 %         |
| 64Zn (KED)  | 204.695 ppb           | 754,772 cps       | 1.3 %         |
| 69Ga (KED)  | 1.636 ppb             | 7,501 cps         | 1.3 %         |
| 75As (KED)  | 0.831 ppb             | 992 cps           | 6.2 %         |
| 80Se (KED)  | 2.930 ppb             | 1,512 cps         | 5.1 %         |
| 85Rb (KED)  | 1.873 ppb             | 7,740 cps         | 0.7 %         |
| 88Sr (KED)  | 5.159 ppb             | 29,511 cps        | 1.2 %         |
| 107Ag (KED) | 0.070 ppb             | 3,796 cps         | 1.8 %         |
| 114Cd (KED) | 0.272 ppb             | 4,532 cps         | 3.2 %         |
| 133Cs (KED) | 0.095 ppb             | 2,257 cps         | 8.2 %         |
| 138Ba (KED) | 5.026 ppb             | 168,503 cps       | 0.8 %         |
| 139La (KED) | 0.419 ppb             | 28,036 cps        | 1.8 %         |
| 140Ce (KED) | 0.830 ppb             | 76,140 cps        | 1.8 %         |
| 141Pr (KED) | 0.094 ppb             | 8,785 cps         | 4.4 %         |
| 142Nd (KED) | 0.489 ppb             | 19,572 cps        | 2.0 %         |
| 152Sm (KED) | 0.059 ppb             | 2,298 cps         | 5.1 %         |
| 153Eu (KED) | 0.013 ppb             | 928 cps           | 5.3 %         |
| 158Gd (KED) | 0.058 ppb             | 3,105 cps         | 4.5 %         |
| 164Dy (KED) | 0.043 ppb             | 2,470 cps         | 6.7 %         |
| 165Ho (KED) | 0.008 ppb             | 1,682 cps         | 2.8 %         |
| 166Er (KED) | 0.020 ppb             | 1,462 cps         | 2.7 %         |
| 169Tm (KED) | 0.003 ppb             | 696 cps           | 9.5 %         |
| 174Yb (KED) | 0.017 ppb             | 1,510 cps         | 4.2 %         |
| 175Lu (KED) | 0.003 ppb             | 367 cps           | 13.4 %        |
| 205Tl (KED) | 0.011 ppb             | 1,910 cps         | 6.4 %         |
| 208Pb (KED) | 0.984 ppb             | 131,275 cps       | 1.1 %         |
| 232Th (KED) | 0.115 ppb             | 28,254 cps        | 1.1 %         |
| 238U (KED)  | 0.031 ppb             | 9,111 cps         | 1.1 %         |

# Comprehensive

8/30/2021 5:35:01 PM

## Sample Summary

Instrument ID: iCAP Q

Analysis index: 23

Analysis name: 18060jian

Analysis started at: 8/30/2021 5:27:39 PM

User name: WINDOWS-UPCI4ER\Administrator

| Category    | Concentration average | Concentration RSD |
|-------------|-----------------------|-------------------|
| 9Be (KED)   | 0.021 ppb             | 150.0 %           |
| 11B (KED)   | 5.828 ppb             | 5.4 %             |
| 24Mg (KED)  | 499.747 ppb           | 0.5 %             |
| 27Al (KED)  | 636.731 ppb           | 1.0 %             |
| 51V (KED)   | 1.156 ppb             | 0.6 %             |
| 52Cr (KED)  | 4.026 ppb             | 26.8 %            |
| 55Mn (KED)  | 15.730 ppb            | 0.8 %             |
| 56Fe (KED)  | 512.183 ppb           | 1.7 %             |
| 58Ni (KED)  | 2.321 ppb             | 2.6 %             |
| 59Co (KED)  | 0.285 ppb             | 2.4 %             |
| 63Cu (KED)  | 9.500 ppb             | 0.8 %             |
| 64Zn (KED)  | 185.219 ppb           | 0.5 %             |
| 69Ga (KED)  | 2.031 ppb             | 0.5 %             |
| 75As (KED)  | 0.780 ppb             | 4.4 %             |
| 80Se (KED)  | 4.752 ppb             | 5.3 %             |
| 85Rb (KED)  | 1.796 ppb             | 3.0 %             |
| 88Sr (KED)  | 5.804 ppb             | 3.2 %             |
| 107Ag (KED) | 0.132 ppb             | 4.1 %             |
| 114Cd (KED) | 0.482 ppb             | 0.4 %             |
| 133Cs (KED) | 0.102 ppb             | 4.7 %             |
| 138Ba (KED) | 6.357 ppb             | 3.6 %             |
| 139La (KED) | 0.465 ppb             | 0.9 %             |
| 140Ce (KED) | 0.959 ppb             | 6.6 %             |
| 141Pr (KED) | 0.105 ppb             | 7.0 %             |
| 142Nd (KED) | 0.533 ppb             | 3.0 %             |
| 152Sm (KED) | 0.068 ppb             | 1.5 %             |
| 153Eu (KED) | 0.015 ppb             | 6.3 %             |
| 158Gd (KED) | 0.061 ppb             | 3.7 %             |
| 164Dy (KED) | 0.044 ppb             | 4.1 %             |
| 165Ho (KED) | 0.009 ppb             | 13.4 %            |
| 166Er (KED) | 0.024 ppb             | 5.1 %             |
| 169Tm (KED) | 0.003 ppb             | 11.4 %            |
| 174Yb (KED) | 0.019 ppb             | 2.0 %             |
| 175Lu (KED) | 0.003 ppb             | 18.6 %            |
| 205Tl (KED) | 0.012 ppb             | 1.5 %             |
| 208Pb (KED) | 0.987 ppb             | 0.9 %             |
| 232Th (KED) | 0.128 ppb             | 2.3 %             |
| 238U (KED)  | 0.033 ppb             | 3.9 %             |

| Category   | Concentration average | Intensity average | Intensity RSD |
|------------|-----------------------|-------------------|---------------|
| 9Be (KED)  | 0.021 ppb             | 3 cps             | 100.0 %       |
| 11B (KED)  | 5.828 ppb             | 397 cps           | 4.7 %         |
| 24Mg (KED) | 499.747 ppb           | 193,277 cps       | 0.5 %         |
| 27Al (KED) | 636.731 ppb           | 58,866 cps        | 1.0 %         |
| 51V (KED)  | 1.156 ppb             | 7,136 cps         | 0.6 %         |
| 52Cr (KED) | 4.026 ppb             | 39,290 cps        | 26.6 %        |
| 55Mn (KED) | 15.730 ppb            | 71,969 cps        | 0.8 %         |
| 56Fe (KED) | 512.183 ppb           | 4,481,509 cps     | 1.7 %         |
| 58Ni (KED) | 2.321 ppb             | 30,038 cps        | 2.4 %         |
| 59Co (KED) | 0.285 ppb             | 5,572 cps         | 2.4 %         |

| Category    | Concentration average | Intensity average | Intensity RSD |
|-------------|-----------------------|-------------------|---------------|
| 63Cu (KED)  | 9.500 ppb             | 143,198 cps       | 0.8 %         |
| 64Zn (KED)  | 185.219 ppb           | 683,051 cps       | 0.5 %         |
| 69Ga (KED)  | 2.031 ppb             | 9,279 cps         | 0.5 %         |
| 75As (KED)  | 0.780 ppb             | 938 cps           | 3.9 %         |
| 80Se (KED)  | 4.752 ppb             | 2,064 cps         | 3.7 %         |
| 85Rb (KED)  | 1.796 ppb             | 7,424 cps         | 3.0 %         |
| 88Sr (KED)  | 5.804 ppb             | 33,189 cps        | 3.2 %         |
| 107Ag (KED) | 0.132 ppb             | 6,516 cps         | 3.7 %         |
| 114Cd (KED) | 0.482 ppb             | 7,918 cps         | 0.4 %         |
| 133Cs (KED) | 0.102 ppb             | 2,426 cps         | 4.5 %         |
| 138Ba (KED) | 6.357 ppb             | 212,013 cps       | 3.5 %         |
| 139La (KED) | 0.465 ppb             | 31,074 cps        | 0.9 %         |
| 140Ce (KED) | 0.959 ppb             | 87,941 cps        | 6.6 %         |
| 141Pr (KED) | 0.105 ppb             | 9,842 cps         | 7.0 %         |
| 142Nd (KED) | 0.533 ppb             | 21,307 cps        | 3.0 %         |
| 152Sm (KED) | 0.068 ppb             | 2,654 cps         | 1.5 %         |
| 153Eu (KED) | 0.015 ppb             | 1,063 cps         | 6.3 %         |
| 158Gd (KED) | 0.061 ppb             | 3,226 cps         | 3.7 %         |
| 164Dy (KED) | 0.044 ppb             | 2,545 cps         | 4.1 %         |
| 165Ho (KED) | 0.009 ppb             | 1,805 cps         | 13.4 %        |
| 166Er (KED) | 0.024 ppb             | 1,748 cps         | 4.9 %         |
| 169Tm (KED) | 0.003 ppb             | 804 cps           | 11.4 %        |
| 174Yb (KED) | 0.019 ppb             | 1,622 cps         | 2.0 %         |
| 175Lu (KED) | 0.003 ppb             | 351 cps           | 18.5 %        |
| 205Tl (KED) | 0.012 ppb             | 2,097 cps         | 1.5 %         |
| 208Pb (KED) | 0.987 ppb             | 131,686 cps       | 0.8 %         |
| 232Th (KED) | 0.128 ppb             | 31,268 cps        | 2.3 %         |
| 238U (KED)  | 0.033 ppb             | 9,579 cps         | 3.9 %         |
