# Supplementary material for: Geographic and breed-specific traceability of cashmere via mineral element profiling in Inner Mongolia (Ordos, Chifeng, and Alxa League)
Source: Royal Society of Chemistry journal article supplement (doi:10.1039/d5ra08122j), 2026-01-01
Supplement: d5ra08122j1.zip [file 20210831-a zuo qi de er tu 6+a zuo qi zha de gai 14.pdf › ԭʼ޿/20210831-a zuo qi de er tu 6+a zuo qi zha de gai 14.pdf]

## Instrument Summary:

Instrument ID: iCAP Q  
Serial Number: Undefined

## Labbook Summary:

Path and filename: \_Application Data\Workspace\LabBooks\wlw\20210831-2.imexp  
Labbook created by: Administrator  
Based on template:  
Hardware configuration: iCAPQ1  
Labbook type: eQuant  
Qtegra version (last saved): 2.7.2425.154  
Labbook started: 8/31/2021 4:11:02 PM  
Labbook finished: 8/31/2021 5:32:23 PM

## Method Summary:

| Isotope     | Mode | Dwell time (s) | # of Channels | Spacing | Resolution | IS |
|-------------|------|----------------|---------------|---------|------------|----|
| 9Be (KED)   | KED  | 0.03           | 3             | 0.1     | Normal     |    |
| 11B (KED)   | KED  | 0.03           | 3             | 0.1     | Normal     |    |
| 24Mg (KED)  | KED  | 0.03           | 3             | 0.1     | Normal     |    |
| 27Al (KED)  | KED  | 0.03           | 3             | 0.1     | Normal     |    |
| 51V (KED)   | KED  | 0.03           | 3             | 0.1     | Normal     |    |
| 52Cr (KED)  | KED  | 0.03           | 3             | 0.1     | Normal     |    |
| 55Mn (KED)  | KED  | 0.03           | 3             | 0.1     | Normal     |    |
| 56Fe (KED)  | KED  | 0.03           | 3             | 0.1     | Normal     |    |
| 58Ni (KED)  | KED  | 0.03           | 3             | 0.1     | Normal     |    |
| 59Co (KED)  | KED  | 0.03           | 3             | 0.1     | Normal     |    |
| 63Cu (KED)  | KED  | 0.03           | 3             | 0.1     | Normal     |    |
| 64Zn (KED)  | KED  | 0.03           | 3             | 0.1     | Normal     |    |
| 69Ga (KED)  | KED  | 0.03           | 3             | 0.1     | Normal     |    |
| 75As (KED)  | KED  | 0.03           | 3             | 0.1     | Normal     |    |
| 80Se (KED)  | KED  | 0.03           | 3             | 0.1     | Normal     |    |
| 85Rb (KED)  | KED  | 0.03           | 3             | 0.1     | Normal     |    |
| 88Sr (KED)  | KED  | 0.03           | 3             | 0.1     | Normal     |    |
| 107Ag (KED) | KED  | 0.03           | 3             | 0.1     | Normal     |    |
| 114Cd (KED) | KED  | 0.03           | 3             | 0.1     | Normal     |    |
| 133Cs (KED) | KED  | 0.03           | 3             | 0.1     | Normal     |    |
| 138Ba (KED) | KED  | 0.03           | 3             | 0.1     | Normal     |    |
| 139La (KED) | KED  | 0.03           | 3             | 0.1     | Normal     |    |
| 140Ce (KED) | KED  | 0.03           | 3             | 0.1     | Normal     |    |
| 141Pr (KED) | KED  | 0.03           | 3             | 0.1     | Normal     |    |
| 142Nd (KED) | KED  | 0.03           | 3             | 0.1     | Normal     |    |
| 152Sm (KED) | KED  | 0.03           | 3             | 0.1     | Normal     |    |
| 153Eu (KED) | KED  | 0.03           | 3             | 0.1     | Normal     |    |
| 158Gd (KED) | KED  | 0.03           | 3             | 0.1     | Normal     |    |
| 164Dy (KED) | KED  | 0.03           | 3             | 0.1     | Normal     |    |
| 165Ho (KED) | KED  | 0.03           | 3             | 0.1     | Normal     |    |
| 166Er (KED) | KED  | 0.03           | 3             | 0.1     | Normal     |    |
| 169Tm (KED) | KED  | 0.03           | 3             | 0.1     | Normal     |    |
| 174Yb (KED) | KED  | 0.03           | 3             | 0.1     | Normal     |    |
| 175Lu (KED) | KED  | 0.03           | 3             | 0.1     | Normal     |    |
| 205Tl (KED) | KED  | 0.03           | 3             | 0.1     | Normal     |    |
| 208Pb (KED) | KED  | 0.03           | 3             | 0.1     | Normal     |    |
| 232Th (KED) | KED  | 0.03           | 3             | 0.1     | Normal     |    |
| 238U (KED)  | KED  | 0.03           | 3             | 0.1     | Normal     |    |

| Isotope    | Mode | Dwell time (s) | # of Channels | Spacing | Resolution |
|------------|------|----------------|---------------|---------|------------|
| 9Be (KED)  | KED  | 0.03           | 3             | 0.1     | Normal     |
| 11B (KED)  | KED  | 0.03           | 3             | 0.1     | Normal     |
| 24Mg (KED) | KED  | 0.03           | 3             | 0.1     | Normal     |
| 27Al (KED) | KED  | 0.03           | 3             | 0.1     | Normal     |
| 51V (KED)  | KED  | 0.03           | 3             | 0.1     | Normal     |
| 52Cr (KED) | KED  | 0.03           | 3             | 0.1     | Normal     |
| 55Mn (KED) | KED  | 0.03           | 3             | 0.1     | Normal     |
| 56Fe (KED) | KED  | 0.03           | 3             | 0.1     | Normal     |
| 58Ni (KED) | KED  | 0.03           | 3             | 0.1     | Normal     |
| 59Co (KED) | KED  | 0.03           | 3             | 0.1     | Normal     |
| 63Cu (KED) | KED  | 0.03           | 3             | 0.1     | Normal     |
| 64Zn (KED) | KED  | 0.03           | 3             | 0.1     | Normal     |
| 69Ga (KED) | KED  | 0.03           | 3             | 0.1     | Normal     |
| 75As (KED) | KED  | 0.03           | 3             | 0.1     | Normal     |
| 80Se (KED) | KED  | 0.03           | 3             | 0.1     | Normal     |
| 85Rb (KED) | KED  | 0.03           | 3             | 0.1     | Normal     |
| 88Sr (KED) | KED  | 0.03           | 3             | 0.1     | Normal     |

| Isotope     | Mode | Dwell time (s) | # of Channels | Spacing | Resolution |
|-------------|------|----------------|---------------|---------|------------|
| 107Ag (KED) | KED  | 0.03           | 3             | 0.1     | Normal     |
| 114Cd (KED) | KED  | 0.03           | 3             | 0.1     | Normal     |
| 133Cs (KED) | KED  | 0.03           | 3             | 0.1     | Normal     |
| 138Ba (KED) | KED  | 0.03           | 3             | 0.1     | Normal     |
| 139La (KED) | KED  | 0.03           | 3             | 0.1     | Normal     |
| 140Ce (KED) | KED  | 0.03           | 3             | 0.1     | Normal     |
| 141Pr (KED) | KED  | 0.03           | 3             | 0.1     | Normal     |
| 142Nd (KED) | KED  | 0.03           | 3             | 0.1     | Normal     |
| 152Sm (KED) | KED  | 0.03           | 3             | 0.1     | Normal     |
| 153Eu (KED) | KED  | 0.03           | 3             | 0.1     | Normal     |
| 158Gd (KED) | KED  | 0.03           | 3             | 0.1     | Normal     |
| 164Dy (KED) | KED  | 0.03           | 3             | 0.1     | Normal     |
| 165Ho (KED) | KED  | 0.03           | 3             | 0.1     | Normal     |
| 166Er (KED) | KED  | 0.03           | 3             | 0.1     | Normal     |
| 169Tm (KED) | KED  | 0.03           | 3             | 0.1     | Normal     |
| 174Yb (KED) | KED  | 0.03           | 3             | 0.1     | Normal     |
| 175Lu (KED) | KED  | 0.03           | 3             | 0.1     | Normal     |
| 205Tl (KED) | KED  | 0.03           | 3             | 0.1     | Normal     |
| 208Pb (KED) | KED  | 0.03           | 3             | 0.1     | Normal     |
| 232Th (KED) | KED  | 0.03           | 3             | 0.1     | Normal     |
| 238U (KED)  | KED  | 0.03           | 3             | 0.1     | Normal     |

| No. of sweeps | Time per sweep[s] | Time per main run[s] |
|---------------|-------------------|----------------------|
| 10            | 3.42              | 34.2                 |

## Calibration Curves:

9Be (KED)

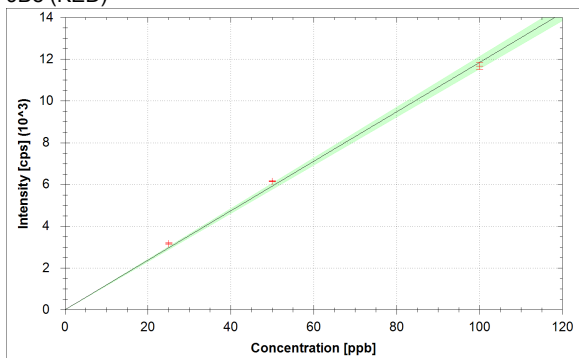

$$f(x) = 118.3741 \cdot x$$

$$R^2 = 0.9982$$

$$\text{BEC} = 0.000 \text{ ppb}$$

$$\text{LoD} = 0.0000 \text{ ppb}$$

11B (KED)

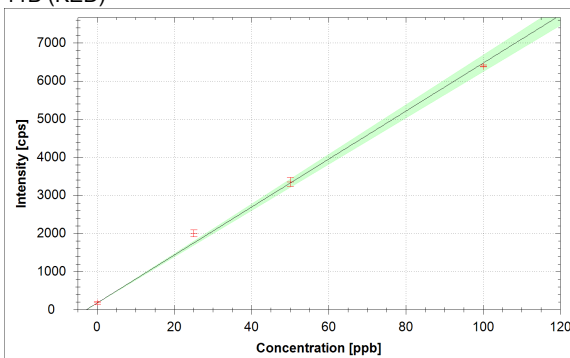

$$f(x) = 62.8886 \cdot x + 177.7797$$

$$R^2 = 0.9966$$

$$\text{BEC} = 2.827 \text{ ppb}$$

$$\text{LoD} = 2.2338 \text{ ppb}$$

24Mg (KED)

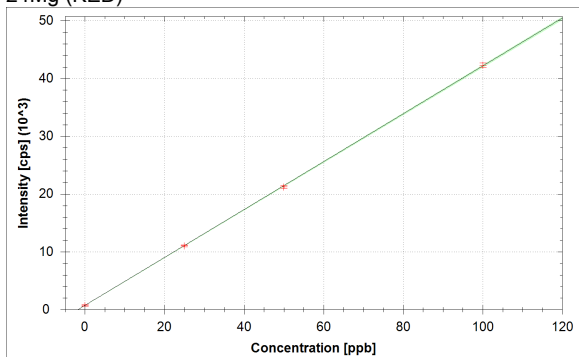

$$f(x) = 414.3832 \cdot x + 723.3589$$

$$R^2 = 0.9999$$

$$\text{BEC} = 1.746 \text{ ppb}$$

$$\text{LoD} = 0.9123 \text{ ppb}$$

27Al (KED)

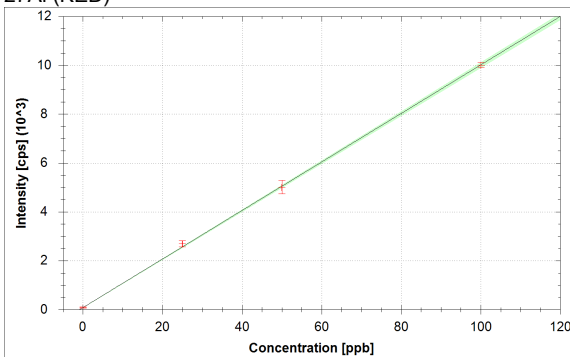

$$f(x) = 99.2837 \cdot x + 81.1115$$

$$R^2 = 0.9997$$

$$\text{BEC} = 0.817 \text{ ppb}$$

$$\text{LoD} = 0.8800 \text{ ppb}$$

51V (KED)

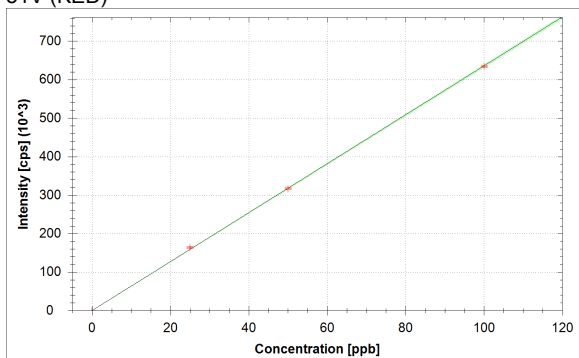

$$f(x) = 6355.9489 \cdot x + 2.2222$$

$$R^2 = 0.9999$$

$$\text{BEC} = 0.000 \text{ ppb}$$

$$\text{LoD} = 0.0009 \text{ ppb}$$

52Cr (KED)

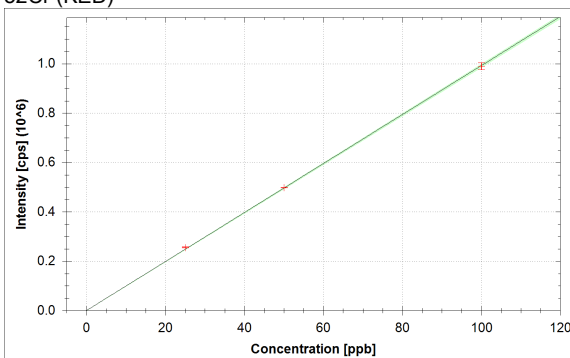

$$f(x) = 9925.6005 \cdot x + 212.2250$$

$$R^2 = 0.9999$$

$$\text{BEC} = 0.021 \text{ ppb}$$

$$\text{LoD} = 0.0219 \text{ ppb}$$

55Mn (KED)

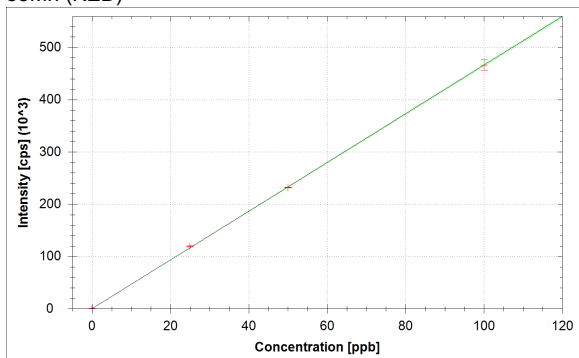

$$f(x) = 4658.6165 \cdot x + 194.4462$$

$$R^2 = 0.9999$$

$$\text{BEC} = 0.042 \text{ ppb}$$

$$\text{LoD} = 0.0126 \text{ ppb}$$

56Fe (KED)

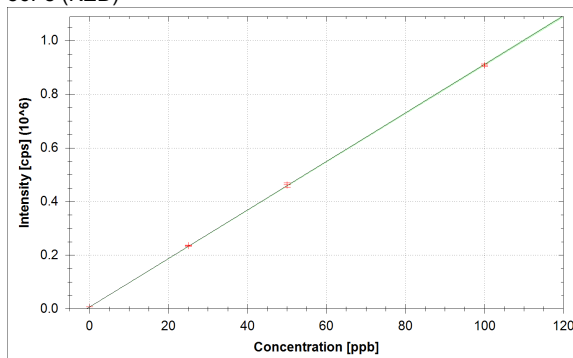

$$f(x) = 9045.2431 \cdot x + 6188.2127$$

$$R^2 = 1.0000$$

$$\text{BEC} = 0.684 \text{ ppb}$$

$$\text{LoD} = 0.0290 \text{ ppb}$$

58Ni (KED)

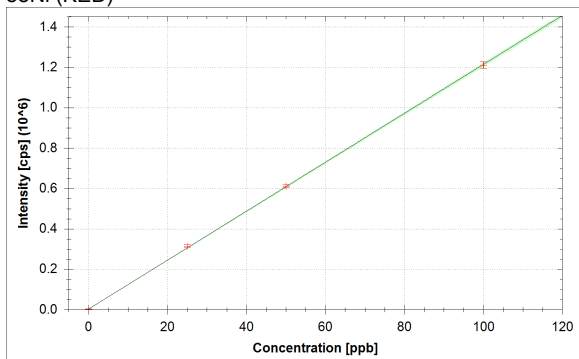

$$f(x) = 12117.1452 \cdot x + 2352.4469$$

$$R^2 = 0.9999$$

$$\text{BEC} = 0.194 \text{ ppb}$$

$$\text{LoD} = 0.0087 \text{ ppb}$$

59Co (KED)

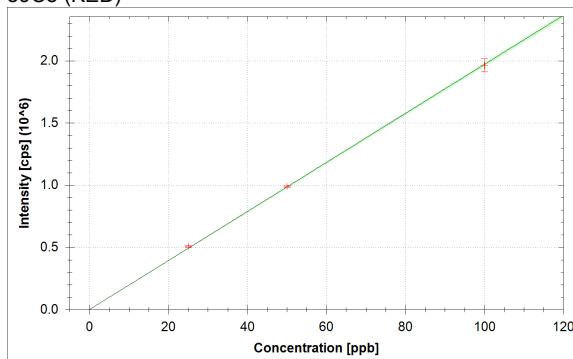

$$f(x) = 19704.4947 \cdot x + 12.2222$$

$$R^2 = 0.9998$$

$$\text{BEC} = 0.001 \text{ ppb}$$

$$\text{LoD} = 0.0012 \text{ ppb}$$

63Cu (KED)

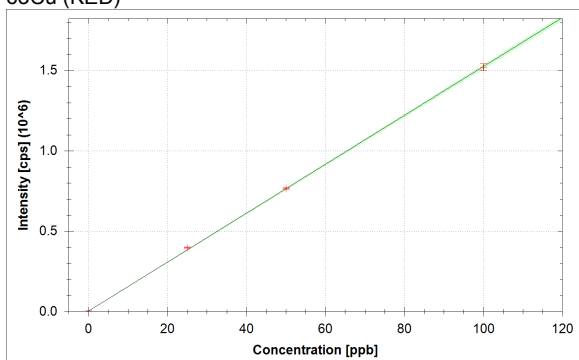

$$f(x) = 15218.4712 \cdot x + 3183.7459$$

$$R^2 = 0.9998$$

$$\text{BEC} = 0.209 \text{ ppb}$$

$$\text{LoD} = 0.0053 \text{ ppb}$$

64Zn (KED)

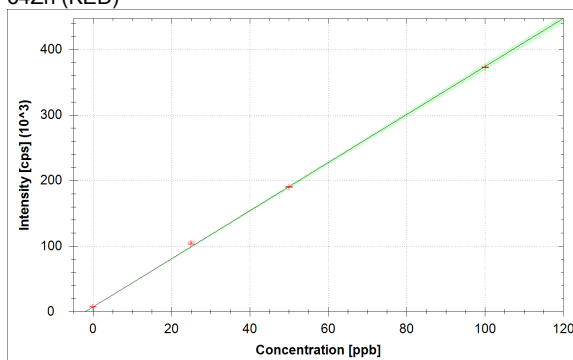

$$f(x) = 3669.3705 \cdot x + 7069.8304$$

$$R^2 = 0.9996$$

$$\text{BEC} = 1.927 \text{ ppb}$$

$$\text{LoD} = 0.3403 \text{ ppb}$$

69Ga (KED)

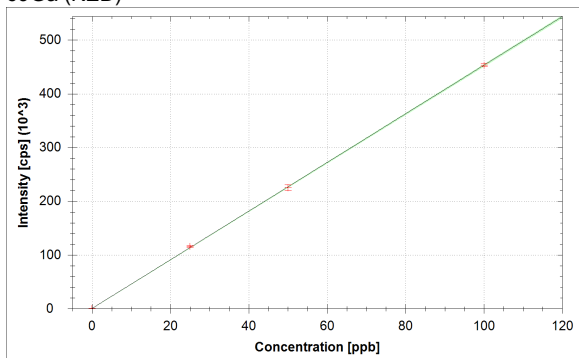

$$f(x) = 4525.6527 \cdot x + 577.8070$$

$$R^2 = 0.9999$$

$$\text{BEC} = 0.128 \text{ ppb}$$

$$\text{LoD} = 0.1525 \text{ ppb}$$

75As (KED)

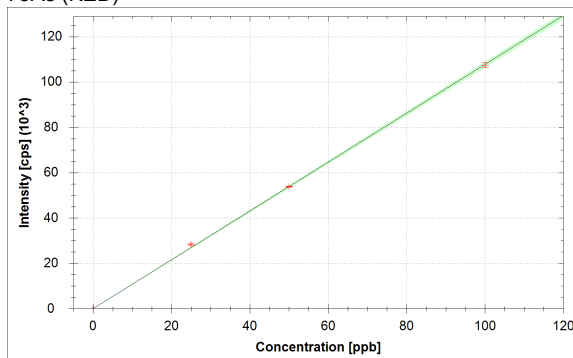

$$f(x) = 1077.0659 \cdot x + 22.2223$$

$$R^2 = 0.9997$$

$$\text{BEC} = 0.021 \text{ ppb}$$

$$\text{LoD} = 0.0054 \text{ ppb}$$

80Se (KED)

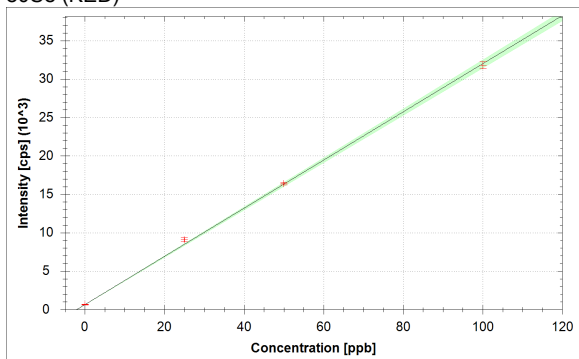

$$f(x) = 313.4548 \cdot x + 644.4620$$

$$R^2 = 0.9992$$

$$\text{BEC} = 2.056 \text{ ppb}$$

$$\text{LoD} = 0.4649 \text{ ppb}$$

85Rb (KED)

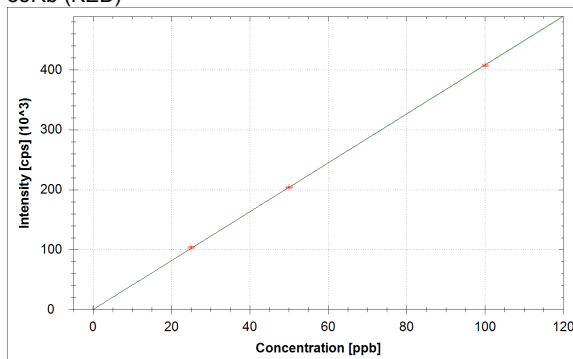

$$f(x) = 4079.7866 \cdot x + 58.8891$$

$$R^2 = 1.0000$$

$$\text{BEC} = 0.014 \text{ ppb}$$

$$\text{LoD} = 0.0163 \text{ ppb}$$

88Sr (KED)

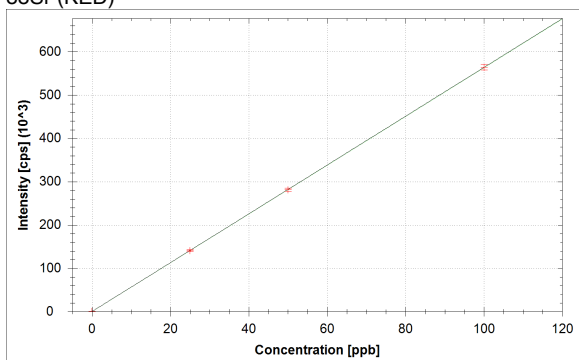

$$f(x) = 5636.5016 \cdot x + 211.1132$$

$$R^2 = 1.0000$$

$$\text{BEC} = 0.037 \text{ ppb}$$

$$\text{LoD} = 0.0101 \text{ ppb}$$

107Ag (KED)

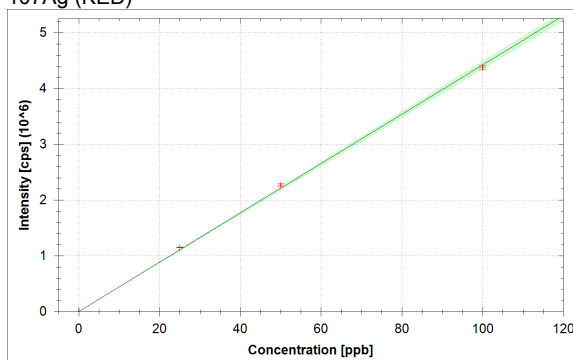

$$f(x) = 44205.3281 \cdot x + 174.4458$$

$$R^2 = 0.9993$$

$$\text{BEC} = 0.004 \text{ ppb}$$

$$\text{LoD} = 0.0007 \text{ ppb}$$

**<sup>114</sup>Cd (KED)**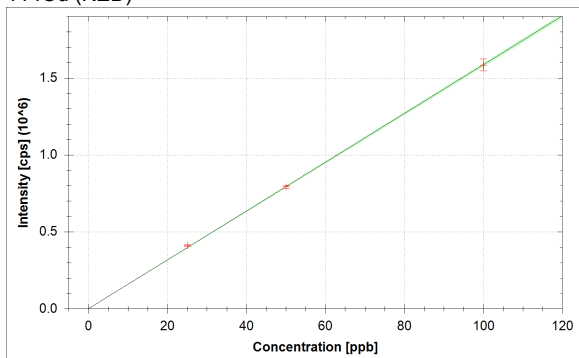

$$f(x) = 15857.2242 \cdot x + 354.4501$$

$$R^2 = 0.9999$$

$$\text{BEC} = 0.022 \text{ ppb}$$

$$\text{LoD} = 0.0018 \text{ ppb}$$

**<sup>133</sup>Cs (KED)**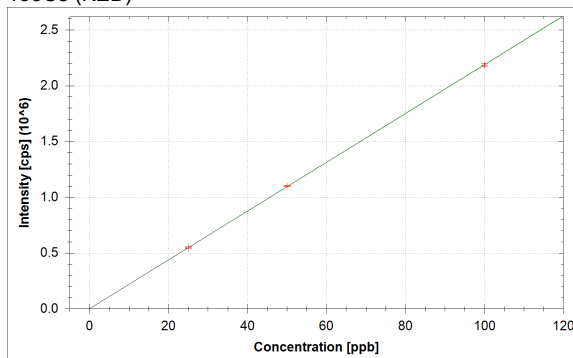

$$f(x) = 21876.4479 \cdot x + 15.5556$$

$$R^2 = 1.0000$$

$$\text{BEC} = 0.001 \text{ ppb}$$

$$\text{LoD} = 0.0011 \text{ ppb}$$

**<sup>138</sup>Ba (KED)**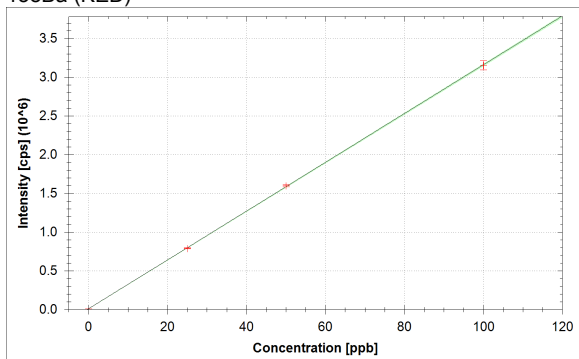

$$f(x) = 31511.0651 \cdot x + 10406.8222$$

$$R^2 = 0.9999$$

$$\text{BEC} = 0.330 \text{ ppb}$$

$$\text{LoD} = 0.0598 \text{ ppb}$$

**<sup>139</sup>La (KED)**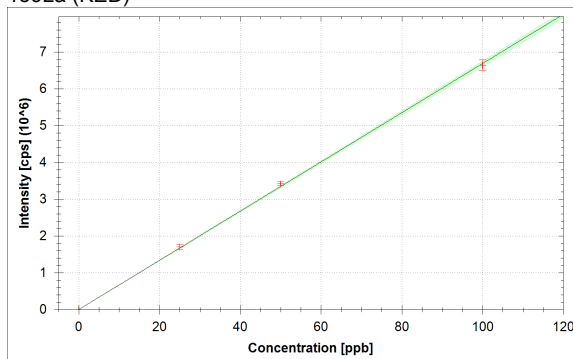

$$f(x) = 66882.7558 \cdot x + 43.3335$$

$$R^2 = 0.9996$$

$$\text{BEC} = 0.001 \text{ ppb}$$

$$\text{LoD} = 0.0003 \text{ ppb}$$

**<sup>140</sup>Ce (KED)**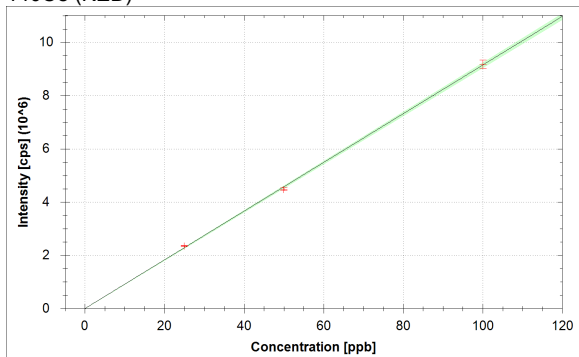

$$f(x) = 91479.8211 \cdot x + 128.8898$$

$$R^2 = 0.9997$$

$$\text{BEC} = 0.001 \text{ ppb}$$

$$\text{LoD} = 0.0006 \text{ ppb}$$

**<sup>141</sup>Pr (KED)**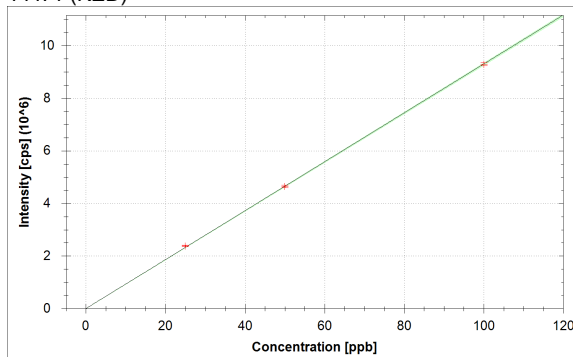

$$f(x) = 93032.9040 \cdot x + 26.6667$$

$$R^2 = 0.9999$$

$$\text{BEC} = 0.000 \text{ ppb}$$

$$\text{LoD} = 0.0005 \text{ ppb}$$

142Nd (KED)

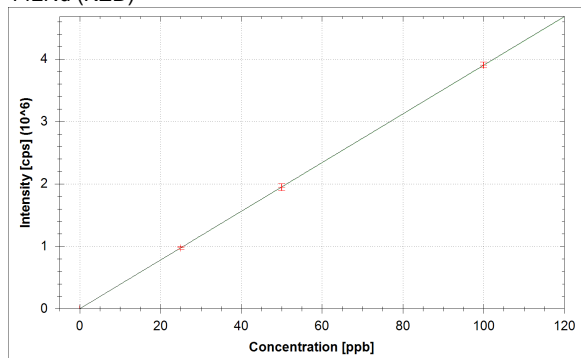

$$f(x) = 38999.9550 \cdot x + 40.0001$$

$$R^2 = 1.0000$$

$$\text{BEC} = 0.001 \text{ ppb}$$

$$\text{LoD} = 0.0016 \text{ ppb}$$

152Sm (KED)

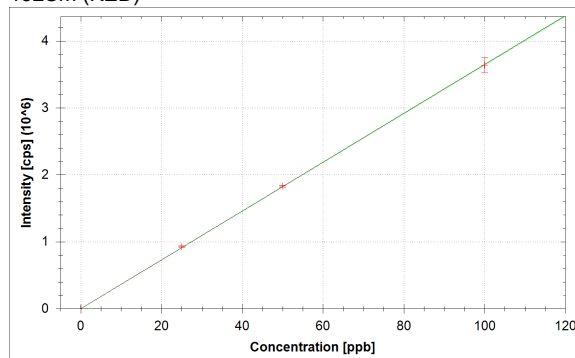

$$f(x) = 36462.5511 \cdot x + 2.2222$$

$$R^2 = 1.0000$$

$$\text{BEC} = 0.000 \text{ ppb}$$

$$\text{LoD} = 0.0003 \text{ ppb}$$

153Eu (KED)

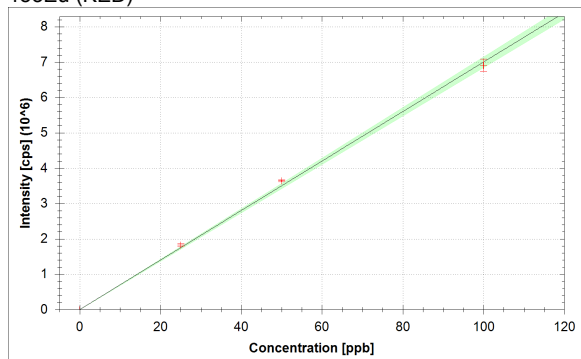

$$f(x) = 69998.1544 \cdot x + 2.2222$$

$$R^2 = 0.9987$$

$$\text{BEC} = 0.000 \text{ ppb}$$

$$\text{LoD} = 0.0001 \text{ ppb}$$

158Gd (KED)

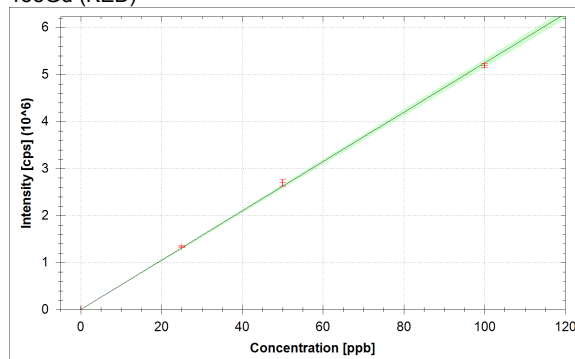

$$f(x) = 52456.0665 \cdot x + 2.2222$$

$$R^2 = 0.9994$$

$$\text{BEC} = 0.000 \text{ ppb}$$

$$\text{LoD} = 0.0002 \text{ ppb}$$

164Dy (KED)

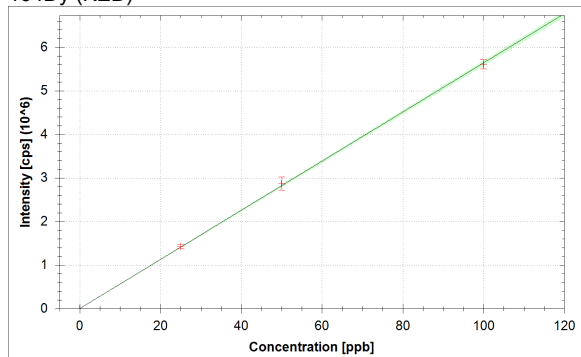

$$f(x) = 56400.6871 \cdot x + 17.7778$$

$$R^2 = 0.9998$$

$$\text{BEC} = 0.000 \text{ ppb}$$

$$\text{LoD} = 0.0004 \text{ ppb}$$

165Ho (KED)

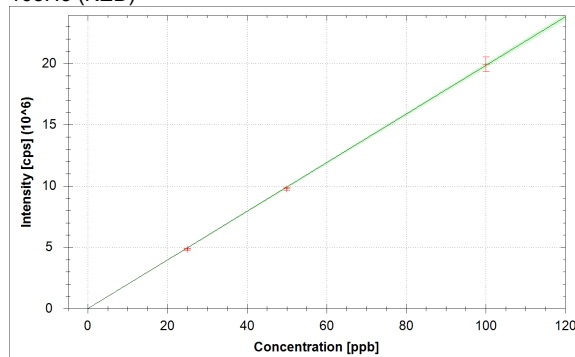

$$f(x) = 198333.7770 \cdot x + 4.4445$$

$$R^2 = 0.9998$$

$$\text{BEC} = 0.000 \text{ ppb}$$

$$\text{LoD} = 0.0001 \text{ ppb}$$

**<sup>166</sup>Er (KED)**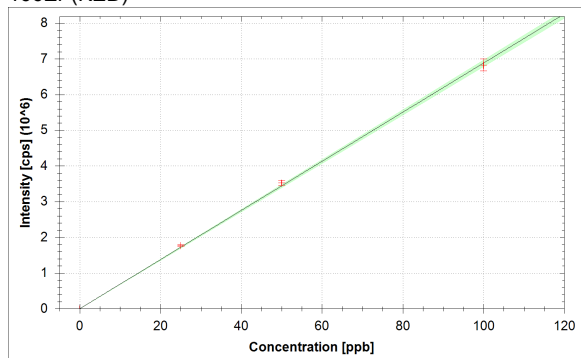

$$f(x) = 68791.3780 \cdot x + 245.5590$$

$$R^2 = 0.9995$$

$$\text{BEC} = 0.004 \text{ ppb}$$

$$\text{LoD} = 0.0034 \text{ ppb}$$

**<sup>169</sup>Tm (KED)**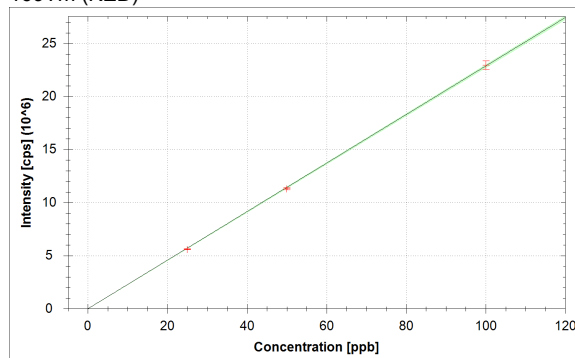

$$f(x) = 228638.3914 \cdot x + 1.1111$$

$$R^2 = 0.9999$$

$$\text{BEC} = 0.000 \text{ ppb}$$

$$\text{LoD} = 0.0000 \text{ ppb}$$

**<sup>174</sup>Yb (KED)**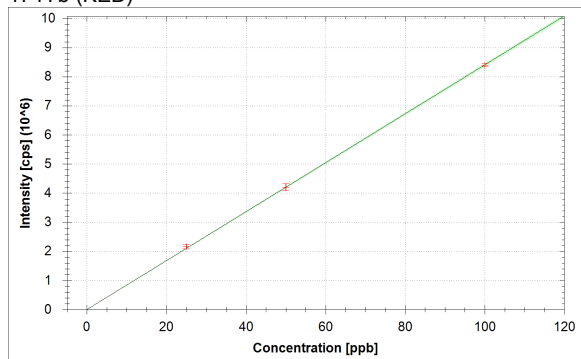

$$f(x) = 84044.4356 \cdot x + 2.2222$$

$$R^2 = 0.9999$$

$$\text{BEC} = 0.000 \text{ ppb}$$

$$\text{LoD} = 0.0001 \text{ ppb}$$

**<sup>175</sup>Lu (KED)**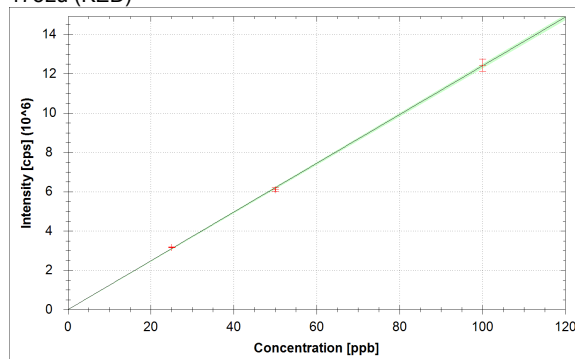

$$f(x) = 124006.4492 \cdot x$$

$$R^2 = 0.9998$$

$$\text{BEC} = 0.000 \text{ ppb}$$

$$\text{LoD} = 0.0000 \text{ ppb}$$

**<sup>205</sup>Tl (KED)**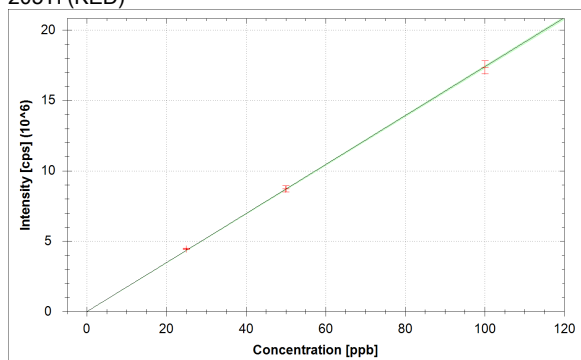

$$f(x) = 173946.9804 \cdot x + 6.6667$$

$$R^2 = 0.9999$$

$$\text{BEC} = 0.000 \text{ ppb}$$

$$\text{LoD} = 0.0001 \text{ ppb}$$

**<sup>208</sup>Pb (KED)**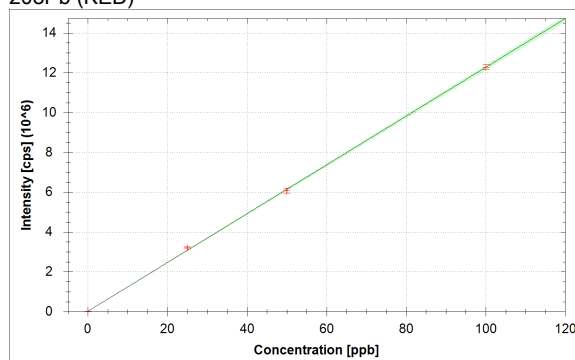

$$f(x) = 122586.5725 \cdot x + 13839.9282$$

$$R^2 = 0.9997$$

$$\text{BEC} = 0.113 \text{ ppb}$$

$$\text{LoD} = 0.0042 \text{ ppb}$$

**<sup>232</sup>Th (KED)**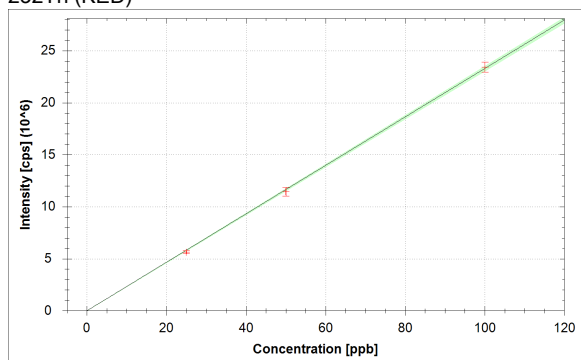

$$f(x) = 232882.1490 \cdot x + 218.8911$$

$$R^2 = 0.9997$$

$$\text{BEC} = 0.001 \text{ ppb}$$

$$\text{LoD} = 0.0000 \text{ ppb}$$

**<sup>238</sup>U (KED)**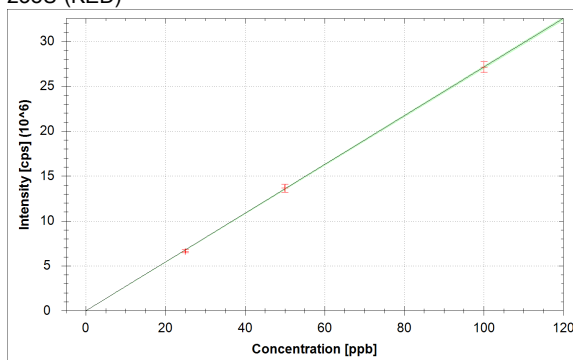

$$f(x) = 271167.6352 \cdot x + 70.0003$$

$$R^2 = 0.9999$$

$$\text{BEC} = 0.000 \text{ ppb}$$

$$\text{LoD} = 0.0001 \text{ ppb}$$

## Standards:

Analysis Index: 3  
 Analysis Name: std1  
 Analysis Type: STD  
 Analysis Started at: 8/31/2021 4:16:56 PM  
 Standard (Stock): std1  
 Standard DF: 1

| Category    | Concentration average | Concentration RSD | Standard Concentration |
|-------------|-----------------------|-------------------|------------------------|
| 9Be (KED)   | 26.802 ppb            | 1.3 %             | 25.000 ppb             |
| 11B (KED)   | 28.978 ppb            | 4.9 %             | 25.000 ppb             |
| 24Mg (KED)  | 24.820 ppb            | 1.5 %             | 25.000 ppb             |
| 27Al (KED)  | 26.269 ppb            | 4.7 %             | 25.000 ppb             |
| 51V (KED)   | 25.779 ppb            | 1.5 %             | 25.000 ppb             |
| 52Cr (KED)  | 25.782 ppb            | 0.9 %             | 25.000 ppb             |
| 55Mn (KED)  | 25.605 ppb            | 1.3 %             | 25.000 ppb             |
| 56Fe (KED)  | 25.309 ppb            | 0.7 %             | 25.000 ppb             |
| 58Ni (KED)  | 25.772 ppb            | 2.2 %             | 25.000 ppb             |
| 59Co (KED)  | 25.813 ppb            | 1.6 %             | 25.000 ppb             |
| 63Cu (KED)  | 25.946 ppb            | 1.0 %             | 25.000 ppb             |
| 64Zn (KED)  | 26.501 ppb            | 1.7 %             | 25.000 ppb             |
| 69Ga (KED)  | 25.481 ppb            | 1.5 %             | 25.000 ppb             |
| 75As (KED)  | 26.326 ppb            | 1.8 %             | 25.000 ppb             |
| 80Se (KED)  | 26.947 ppb            | 3.1 %             | 25.000 ppb             |
| 85Rb (KED)  | 25.335 ppb            | 2.2 %             | 25.000 ppb             |
| 88Sr (KED)  | 24.937 ppb            | 1.8 %             | 25.000 ppb             |
| 107Ag (KED) | 25.967 ppb            | 0.7 %             | 25.000 ppb             |
| 114Cd (KED) | 25.855 ppb            | 1.1 %             | 25.000 ppb             |
| 133Cs (KED) | 25.096 ppb            | 1.1 %             | 25.000 ppb             |
| 138Ba (KED) | 24.766 ppb            | 1.1 %             | 25.000 ppb             |
| 139La (KED) | 25.425 ppb            | 3.8 %             | 25.000 ppb             |
| 140Ce (KED) | 25.696 ppb            | 0.9 %             | 25.000 ppb             |
| 141Pr (KED) | 25.627 ppb            | 1.1 %             | 25.000 ppb             |
| 142Nd (KED) | 25.009 ppb            | 2.6 %             | 25.000 ppb             |
| 152Sm (KED) | 25.406 ppb            | 1.1 %             | 25.000 ppb             |
| 153Eu (KED) | 26.089 ppb            | 1.9 %             | 25.000 ppb             |
| 158Gd (KED) | 25.573 ppb            | 1.7 %             | 25.000 ppb             |
| 164Dy (KED) | 25.386 ppb            | 3.1 %             | 25.000 ppb             |
| 165Ho (KED) | 24.412 ppb            | 1.8 %             | 25.000 ppb             |
| 166Er (KED) | 25.706 ppb            | 1.6 %             | 25.000 ppb             |
| 169Tm (KED) | 24.515 ppb            | 0.8 %             | 25.000 ppb             |
| 174Yb (KED) | 25.784 ppb            | 3.8 %             | 25.000 ppb             |
| 175Lu (KED) | 25.557 ppb            | 0.5 %             | 25.000 ppb             |
| 205Tl (KED) | 25.652 ppb            | 1.1 %             | 25.000 ppb             |
| 208Pb (KED) | 26.028 ppb            | 1.6 %             | 25.000 ppb             |
| 232Th (KED) | 24.240 ppb            | 2.4 %             | 25.000 ppb             |
| 238U (KED)  | 24.357 ppb            | 2.8 %             | 25.000 ppb             |

**Standards:**

Analysis Index: 4  
 Analysis Name: std2  
 Analysis Type: STD  
 Analysis Started at: 8/31/2021 4:20:09 PM  
 Standard (Stock): std2  
 Standard DF: 1

| Category    | Concentration average | Concentration RSD | Standard Concentration |
|-------------|-----------------------|-------------------|------------------------|
| 9Be (KED)   | 52.004 ppb            | 0.4 %             | 50.000 ppb             |
| 11B (KED)   | 50.467 ppb            | 3.9 %             | 50.000 ppb             |
| 24Mg (KED)  | 49.485 ppb            | 1.2 %             | 50.000 ppb             |
| 27Al (KED)  | 49.632 ppb            | 5.5 %             | 50.000 ppb             |
| 51V (KED)   | 49.889 ppb            | 1.0 %             | 50.000 ppb             |
| 52Cr (KED)  | 50.169 ppb            | 0.2 %             | 50.000 ppb             |
| 55Mn (KED)  | 49.682 ppb            | 0.3 %             | 50.000 ppb             |
| 56Fe (KED)  | 50.315 ppb            | 1.8 %             | 50.000 ppb             |
| 58Ni (KED)  | 50.279 ppb            | 1.3 %             | 50.000 ppb             |
| 59Co (KED)  | 50.248 ppb            | 0.8 %             | 50.000 ppb             |
| 63Cu (KED)  | 50.138 ppb            | 0.6 %             | 50.000 ppb             |
| 64Zn (KED)  | 49.854 ppb            | 0.6 %             | 50.000 ppb             |
| 69Ga (KED)  | 49.671 ppb            | 2.4 %             | 50.000 ppb             |
| 75As (KED)  | 49.879 ppb            | 0.3 %             | 50.000 ppb             |
| 80Se (KED)  | 50.256 ppb            | 1.1 %             | 50.000 ppb             |
| 85Rb (KED)  | 49.990 ppb            | 0.8 %             | 50.000 ppb             |
| 88Sr (KED)  | 49.884 ppb            | 1.3 %             | 50.000 ppb             |
| 107Ag (KED) | 51.331 ppb            | 1.3 %             | 50.000 ppb             |
| 114Cd (KED) | 49.899 ppb            | 1.3 %             | 50.000 ppb             |
| 133Cs (KED) | 50.251 ppb            | 0.5 %             | 50.000 ppb             |
| 138Ba (KED) | 50.485 ppb            | 1.0 %             | 50.000 ppb             |
| 139La (KED) | 51.185 ppb            | 1.3 %             | 50.000 ppb             |
| 140Ce (KED) | 48.975 ppb            | 1.1 %             | 50.000 ppb             |
| 141Pr (KED) | 49.924 ppb            | 1.1 %             | 50.000 ppb             |
| 142Nd (KED) | 49.874 ppb            | 2.8 %             | 50.000 ppb             |
| 152Sm (KED) | 50.201 ppb            | 0.7 %             | 50.000 ppb             |
| 153Eu (KED) | 52.018 ppb            | 0.8 %             | 50.000 ppb             |
| 158Gd (KED) | 51.520 ppb            | 2.7 %             | 50.000 ppb             |
| 164Dy (KED) | 50.903 ppb            | 5.2 %             | 50.000 ppb             |
| 165Ho (KED) | 49.284 ppb            | 1.2 %             | 50.000 ppb             |
| 166Er (KED) | 51.248 ppb            | 2.0 %             | 50.000 ppb             |
| 169Tm (KED) | 49.464 ppb            | 1.0 %             | 50.000 ppb             |
| 174Yb (KED) | 49.920 ppb            | 2.9 %             | 50.000 ppb             |
| 175Lu (KED) | 49.191 ppb            | 1.7 %             | 50.000 ppb             |
| 205Tl (KED) | 50.102 ppb            | 2.4 %             | 50.000 ppb             |
| 208Pb (KED) | 49.432 ppb            | 2.1 %             | 50.000 ppb             |
| 232Th (KED) | 49.195 ppb            | 3.7 %             | 50.000 ppb             |
| 238U (KED)  | 50.301 ppb            | 3.2 %             | 50.000 ppb             |

**Standards:**

Analysis Index: 5  
 Analysis Name: std3  
 Analysis Type: STD  
 Analysis Started at: 8/31/2021 4:23:16 PM  
 Standard (Stock): std3  
 Standard DF: 1

| Category    | Concentration average | Concentration RSD | Standard Concentration |
|-------------|-----------------------|-------------------|------------------------|
| 9Be (KED)   | 98.547 ppb            | 1.5 %             | 100.000 ppb            |
| 11B (KED)   | 98.772 ppb            | 0.4 %             | 100.000 ppb            |
| 24Mg (KED)  | 100.303 ppb           | 0.9 %             | 100.000 ppb            |
| 27Al (KED)  | 99.867 ppb            | 1.1 %             | 100.000 ppb            |
| 51V (KED)   | 99.861 ppb            | 0.5 %             | 100.000 ppb            |
| 52Cr (KED)  | 99.720 ppb            | 1.4 %             | 100.000 ppb            |
| 55Mn (KED)  | 100.008 ppb           | 2.2 %             | 100.000 ppb            |
| 56Fe (KED)  | 99.765 ppb            | 0.5 %             | 100.000 ppb            |
| 58Ni (KED)  | 99.668 ppb            | 1.3 %             | 100.000 ppb            |
| 59Co (KED)  | 99.673 ppb            | 2.7 %             | 100.000 ppb            |
| 63Cu (KED)  | 99.695 ppb            | 1.3 %             | 100.000 ppb            |
| 64Zn (KED)  | 99.698 ppb            | 0.2 %             | 100.000 ppb            |
| 69Ga (KED)  | 100.044 ppb           | 0.7 %             | 100.000 ppb            |
| 75As (KED)  | 99.729 ppb            | 1.2 %             | 100.000 ppb            |
| 80Se (KED)  | 99.385 ppb            | 1.5 %             | 100.000 ppb            |
| 85Rb (KED)  | 99.921 ppb            | 0.5 %             | 100.000 ppb            |
| 88Sr (KED)  | 100.074 ppb           | 1.2 %             | 100.000 ppb            |
| 107Ag (KED) | 99.093 ppb            | 0.8 %             | 100.000 ppb            |
| 114Cd (KED) | 99.837 ppb            | 2.5 %             | 100.000 ppb            |
| 133Cs (KED) | 99.851 ppb            | 0.7 %             | 100.000 ppb            |
| 138Ba (KED) | 99.816 ppb            | 1.9 %             | 100.000 ppb            |
| 139La (KED) | 99.302 ppb            | 2.3 %             | 100.000 ppb            |
| 140Ce (KED) | 100.339 ppb           | 1.7 %             | 100.000 ppb            |
| 141Pr (KED) | 99.881 ppb            | 0.7 %             | 100.000 ppb            |
| 142Nd (KED) | 100.061 ppb           | 1.2 %             | 100.000 ppb            |
| 152Sm (KED) | 99.798 ppb            | 3.1 %             | 100.000 ppb            |
| 153Eu (KED) | 98.719 ppb            | 2.6 %             | 100.000 ppb            |
| 158Gd (KED) | 99.097 ppb            | 0.8 %             | 100.000 ppb            |
| 164Dy (KED) | 99.452 ppb            | 2.0 %             | 100.000 ppb            |
| 165Ho (KED) | 100.505 ppb           | 3.0 %             | 100.000 ppb            |
| 166Er (KED) | 99.200 ppb            | 2.5 %             | 100.000 ppb            |
| 169Tm (KED) | 100.389 ppb           | 1.7 %             | 100.000 ppb            |
| 174Yb (KED) | 99.844 ppb            | 0.7 %             | 100.000 ppb            |
| 175Lu (KED) | 100.265 ppb           | 2.5 %             | 100.000 ppb            |
| 205Tl (KED) | 99.786 ppb            | 2.7 %             | 100.000 ppb            |
| 208Pb (KED) | 100.027 ppb           | 1.0 %             | 100.000 ppb            |
| 232Th (KED) | 100.593 ppb           | 2.1 %             | 100.000 ppb            |
| 238U (KED)  | 100.010 ppb           | 2.1 %             | 100.000 ppb            |

## Sample List Summary:

Instrument ID: iCAP Q

| Index: | Label:    | Main<br>Runs: | Survey<br>Runs: | Start Time:          | User name:                    |
|--------|-----------|---------------|-----------------|----------------------|-------------------------------|
| 1      | water     | 3             | 0               | 8/31/2021 4:11:06 PM | WINDOWS-UPC14ER\Administrator |
| 2      | blk       | 3             | 0               | 8/31/2021 4:13:50 PM | WINDOWS-UPC14ER\Administrator |
| 3      | std1      | 3             | 0               | 8/31/2021 4:16:56 PM | WINDOWS-UPC14ER\Administrator |
| 4      | std2      | 3             | 0               | 8/31/2021 4:20:09 PM | WINDOWS-UPC14ER\Administrator |
| 5      | std3      | 3             | 0               | 8/31/2021 4:23:16 PM | WINDOWS-UPC14ER\Administrator |
| 6      | 18110jian | 3             | 0               | 8/31/2021 4:26:30 PM | WINDOWS-UPC14ER\Administrator |
| 7      | 17426jian | 3             | 0               | 8/31/2021 4:29:36 PM | WINDOWS-UPC14ER\Administrator |
| 8      | 18052jian | 3             | 0               | 8/31/2021 4:32:39 PM | WINDOWS-UPC14ER\Administrator |
| 9      | 18062jian | 3             | 0               | 8/31/2021 4:35:50 PM | WINDOWS-UPC14ER\Administrator |
| 10     | 17196jian | 3             | 0               | 8/31/2021 4:38:58 PM | WINDOWS-UPC14ER\Administrator |
| 11     | 17640jian | 3             | 0               | 8/31/2021 4:42:11 PM | WINDOWS-UPC14ER\Administrator |
| 12     | 296jian   | 3             | 0               | 8/31/2021 4:45:24 PM | WINDOWS-UPC14ER\Administrator |
| 13     | 292jian   | 3             | 0               | 8/31/2021 4:48:36 PM | WINDOWS-UPC14ER\Administrator |
| 14     | 286jian   | 3             | 0               | 8/31/2021 4:52:01 PM | WINDOWS-UPC14ER\Administrator |
| 15     | 300jian   | 3             | 0               | 8/31/2021 4:55:10 PM | WINDOWS-UPC14ER\Administrator |
| 16     | 298jian   | 3             | 0               | 8/31/2021 4:58:28 PM | WINDOWS-UPC14ER\Administrator |
| 17     | 17020jian | 3             | 0               | 8/31/2021 5:01:36 PM | WINDOWS-UPC14ER\Administrator |
| 18     | 288jian   | 3             | 0               | 8/31/2021 5:04:40 PM | WINDOWS-UPC14ER\Administrator |
| 19     | 282jian   | 3             | 0               | 8/31/2021 5:08:00 PM | WINDOWS-UPC14ER\Administrator |
| 20     | 17013jian | 3             | 0               | 8/31/2021 5:11:29 PM | WINDOWS-UPC14ER\Administrator |
| 21     | 284jian   | 3             | 0               | 8/31/2021 5:14:49 PM | WINDOWS-UPC14ER\Administrator |
| 22     | 294jian   | 3             | 0               | 8/31/2021 5:18:34 PM | WINDOWS-UPC14ER\Administrator |
| 23     | 316jian   | 3             | 0               | 8/31/2021 5:22:03 PM | WINDOWS-UPC14ER\Administrator |
| 24     | 308jian   | 3             | 0               | 8/31/2021 5:25:37 PM | WINDOWS-UPC14ER\Administrator |
| 25     | 302jian   | 3             | 0               | 8/31/2021 5:29:04 PM | WINDOWS-UPC14ER\Administrator |

## Sample Summary

Instrument ID: iCAP Q

Analysis index: 1

Analysis name: water

Analysis started at: 8/31/2021 4:11:06 PM

User name: WINDOWS-UPCI4ER\Administrator

| Category    | Concentration average | Concentration RSD |
|-------------|-----------------------|-------------------|
| 9Be (KED)   | 0.000 ppb             |                   |
| 11B (KED)   | -2.721 ppb            | 1.9 %             |
| 24Mg (KED)  | -1.574 ppb            | 0.8 %             |
| 27Al (KED)  | -0.772 ppb            | 2.5 %             |
| 51V (KED)   | 0.001 ppb             | 0.0 %             |
| 52Cr (KED)  | -0.016 ppb            | 10.5 %            |
| 55Mn (KED)  | -0.019 ppb            | 34.0 %            |
| 56Fe (KED)  | -0.647 ppb            | 0.1 %             |
| 58Ni (KED)  | -0.093 ppb            | 4.9 %             |
| 59Co (KED)  | 0.000 ppb             | 158.7 %           |
| 63Cu (KED)  | -0.196 ppb            | 0.9 %             |
| 64Zn (KED)  | -1.814 ppb            | 0.6 %             |
| 69Ga (KED)  | -0.122 ppb            | 2.5 %             |
| 75As (KED)  | -0.008 ppb            | 99.2 %            |
| 80Se (KED)  | 0.060 ppb             | 153.8 %           |
| 85Rb (KED)  | -0.013 ppb            | 15.1 %            |
| 88Sr (KED)  | -0.035 ppb            | 2.0 %             |
| 107Ag (KED) | -0.004 ppb            | 1.2 %             |
| 114Cd (KED) | -0.022 ppb            | 1.1 %             |
| 133Cs (KED) | -0.001 ppb            | 27.3 %            |
| 138Ba (KED) | -0.322 ppb            | 0.6 %             |
| 139La (KED) | -0.001 ppb            | 4.6 %             |
| 140Ce (KED) | -0.001 ppb            |                   |
| 141Pr (KED) | 0.000 ppb             | 24.7 %            |
| 142Nd (KED) | -0.001 ppb            | 0.0 %             |
| 152Sm (KED) | 0.000 ppb             | 0.0 %             |
| 153Eu (KED) | 0.000 ppb             | 0.0 %             |
| 158Gd (KED) | 0.000 ppb             | 0.0 %             |
| 164Dy (KED) | 0.000 ppb             | 0.0 %             |
| 165Ho (KED) | 0.000 ppb             | 0.0 %             |
| 166Er (KED) | -0.004 ppb            | 0.8 %             |
| 169Tm (KED) | 0.000 ppb             | 0.0 %             |
| 174Yb (KED) | 0.000 ppb             | 0.0 %             |
| 175Lu (KED) | 0.000 ppb             |                   |
| 205Tl (KED) | 0.000 ppb             | 89.2 %            |
| 208Pb (KED) | -0.112 ppb            | 0.2 %             |
| 232Th (KED) | -0.001 ppb            | 1.8 %             |
| 238U (KED)  | 0.000 ppb             | 2.8 %             |

| Category   | Concentration average | Intensity average | Intensity RSD |
|------------|-----------------------|-------------------|---------------|
| 9Be (KED)  | 0.000 ppb             | 0 cps             |               |
| 11B (KED)  | -2.721 ppb            | 7 cps             | 50.0 %        |
| 24Mg (KED) | -1.574 ppb            | 71 cps            | 7.2 %         |
| 27Al (KED) | -0.772 ppb            | 4 cps             | 43.3 %        |
| 51V (KED)  | 0.001 ppb             | 7 cps             | 0.0 %         |
| 52Cr (KED) | -0.016 ppb            | 53 cps            | 31.3 %        |
| 55Mn (KED) | -0.019 ppb            | 106 cps           | 28.7 %        |
| 56Fe (KED) | -0.647 ppb            | 339 cps           | 2.5 %         |
| 58Ni (KED) | -0.093 ppb            | 1,227 cps         | 4.5 %         |
| 59Co (KED) | 0.000 ppb             | 7 cps             | 132.3 %       |

| Category    | Concentration average | Intensity average | Intensity RSD |
|-------------|-----------------------|-------------------|---------------|
| 63Cu (KED)  | -0.196 ppb            | 198 cps           | 12.9 %        |
| 64Zn (KED)  | -1.814 ppb            | 414 cps           | 9.5 %         |
| 69Ga (KED)  | -0.122 ppb            | 24 cps            | 56.8 %        |
| 75As (KED)  | -0.008 ppb            | 13 cps            | 66.1 %        |
| 80Se (KED)  | 0.060 ppb             | 663 cps           | 4.4 %         |
| 85Rb (KED)  | -0.013 ppb            | 8 cps             | 99.0 %        |
| 88Sr (KED)  | -0.035 ppb            | 16 cps            | 24.7 %        |
| 107Ag (KED) | -0.004 ppb            | 11 cps            | 17.3 %        |
| 114Cd (KED) | -0.022 ppb            | 6 cps             | 69.3 %        |
| 133Cs (KED) | -0.001 ppb            | 3 cps             | 100.0 %       |
| 138Ba (KED) | -0.322 ppb            | 264 cps           | 22.2 %        |
| 139La (KED) | -0.001 ppb            | 1 cps             | 173.2 %       |
| 140Ce (KED) | -0.001 ppb            | 0 cps             |               |
| 141Pr (KED) | 0.000 ppb             | 3 cps             | 173.2 %       |
| 142Nd (KED) | -0.001 ppb            | 0 cps             |               |
| 152Sm (KED) | 0.000 ppb             | 0 cps             |               |
| 153Eu (KED) | 0.000 ppb             | 0 cps             |               |
| 158Gd (KED) | 0.000 ppb             | 0 cps             |               |
| 164Dy (KED) | 0.000 ppb             | 0 cps             |               |
| 165Ho (KED) | 0.000 ppb             | 0 cps             |               |
| 166Er (KED) | -0.004 ppb            | 1 cps             | 173.2 %       |
| 169Tm (KED) | 0.000 ppb             | 0 cps             |               |
| 174Yb (KED) | 0.000 ppb             | 0 cps             |               |
| 175Lu (KED) | 0.000 ppb             | 0 cps             |               |
| 205Tl (KED) | 0.000 ppb             | 14 cps            | 48.0 %        |
| 208Pb (KED) | -0.112 ppb            | 112 cps           | 27.6 %        |
| 232Th (KED) | -0.001 ppb            | 2 cps             | 173.2 %       |
| 238U (KED)  | 0.000 ppb             | 2 cps             | 86.6 %        |

## Sample Summary

Instrument ID: iCAP Q

Analysis index: 2

Analysis name: blk

Analysis started at: 8/31/2021 4:13:50 PM

User name: WINDOWS-UPCI4ER\Administrator

| Category    | Concentration average | Concentration RSD |
|-------------|-----------------------|-------------------|
| 9Be (KED)   | 0.000 ppb             |                   |
| 11B (KED)   | 0.000 ppb             | 26.3 %            |
| 24Mg (KED)  | 0.000 ppb             | 17.4 %            |
| 27Al (KED)  | 0.000 ppb             | 35.9 %            |
| 51V (KED)   | 0.000 ppb             | 86.6 %            |
| 52Cr (KED)  | 0.000 ppb             | 34.2 %            |
| 55Mn (KED)  | 0.000 ppb             | 10.0 %            |
| 56Fe (KED)  | 0.000 ppb             | 1.4 %             |
| 58Ni (KED)  | 0.000 ppb             | 1.5 %             |
| 59Co (KED)  | 0.000 ppb             | 63.0 %            |
| 63Cu (KED)  | 0.000 ppb             | 0.8 %             |
| 64Zn (KED)  | 0.000 ppb             | 5.9 %             |
| 69Ga (KED)  | 0.000 ppb             | 39.8 %            |
| 75As (KED)  | 0.000 ppb             | 8.7 %             |
| 80Se (KED)  | 0.000 ppb             | 7.5 %             |
| 85Rb (KED)  | 0.000 ppb             | 37.7 %            |
| 88Sr (KED)  | 0.000 ppb             | 9.0 %             |
| 107Ag (KED) | 0.000 ppb             | 5.8 %             |
| 114Cd (KED) | 0.000 ppb             | 2.7 %             |
| 133Cs (KED) | 0.000 ppb             | 49.5 %            |
| 138Ba (KED) | 0.000 ppb             | 6.0 %             |
| 139La (KED) | 0.000 ppb             | 15.4 %            |
| 140Ce (KED) | 0.000 ppb             | 14.7 %            |
| 141Pr (KED) | 0.000 ppb             | 54.5 %            |
| 142Nd (KED) | 0.000 ppb             | 50.7 %            |
| 152Sm (KED) | 0.000 ppb             | 173.2 %           |
| 153Eu (KED) | 0.000 ppb             | 86.6 %            |
| 158Gd (KED) | 0.000 ppb             | 173.2 %           |
| 164Dy (KED) | 0.000 ppb             | 47.2 %            |
| 165Ho (KED) | 0.000 ppb             | 114.6 %           |
| 166Er (KED) | 0.000 ppb             | 31.8 %            |
| 169Tm (KED) | 0.000 ppb             | 173.2 %           |
| 174Yb (KED) | 0.000 ppb             | 86.6 %            |
| 175Lu (KED) | 0.000 ppb             |                   |
| 205Tl (KED) | 0.000 ppb             | 50.0 %            |
| 208Pb (KED) | 0.000 ppb             | 1.2 %             |
| 232Th (KED) | 0.000 ppb             | 1.8 %             |
| 238U (KED)  | 0.000 ppb             | 12.6 %            |

| Category   | Concentration average | Intensity average | Intensity RSD |
|------------|-----------------------|-------------------|---------------|
| 9Be (KED)  | 0.000 ppb             | 0 cps             |               |
| 11B (KED)  | 0.000 ppb             | 178 cps           | 26.3 %        |
| 24Mg (KED) | 0.000 ppb             | 723 cps           | 17.4 %        |
| 27Al (KED) | 0.000 ppb             | 81 cps            | 35.9 %        |
| 51V (KED)  | 0.000 ppb             | 2 cps             | 86.6 %        |
| 52Cr (KED) | 0.000 ppb             | 212 cps           | 34.2 %        |
| 55Mn (KED) | 0.000 ppb             | 194 cps           | 10.0 %        |
| 56Fe (KED) | 0.000 ppb             | 6,188 cps         | 1.4 %         |
| 58Ni (KED) | 0.000 ppb             | 2,352 cps         | 1.5 %         |
| 59Co (KED) | 0.000 ppb             | 12 cps            | 63.0 %        |

| Category    | Concentration average | Intensity average | Intensity RSD |
|-------------|-----------------------|-------------------|---------------|
| 63Cu (KED)  | 0.000 ppb             | 3,184 cps         | 0.8 %         |
| 64Zn (KED)  | 0.000 ppb             | 7,070 cps         | 5.9 %         |
| 69Ga (KED)  | 0.000 ppb             | 578 cps           | 39.8 %        |
| 75As (KED)  | 0.000 ppb             | 22 cps            | 8.7 %         |
| 80Se (KED)  | 0.000 ppb             | 644 cps           | 7.5 %         |
| 85Rb (KED)  | 0.000 ppb             | 59 cps            | 37.7 %        |
| 88Sr (KED)  | 0.000 ppb             | 211 cps           | 9.0 %         |
| 107Ag (KED) | 0.000 ppb             | 174 cps           | 5.8 %         |
| 114Cd (KED) | 0.000 ppb             | 354 cps           | 2.7 %         |
| 133Cs (KED) | 0.000 ppb             | 16 cps            | 49.5 %        |
| 138Ba (KED) | 0.000 ppb             | 10,407 cps        | 6.0 %         |
| 139La (KED) | 0.000 ppb             | 43 cps            | 15.4 %        |
| 140Ce (KED) | 0.000 ppb             | 129 cps           | 14.7 %        |
| 141Pr (KED) | 0.000 ppb             | 27 cps            | 54.5 %        |
| 142Nd (KED) | 0.000 ppb             | 40 cps            | 50.7 %        |
| 152Sm (KED) | 0.000 ppb             | 2 cps             | 173.2 %       |
| 153Eu (KED) | 0.000 ppb             | 2 cps             | 86.6 %        |
| 158Gd (KED) | 0.000 ppb             | 2 cps             | 173.2 %       |
| 164Dy (KED) | 0.000 ppb             | 18 cps            | 47.2 %        |
| 165Ho (KED) | 0.000 ppb             | 4 cps             | 114.6 %       |
| 166Er (KED) | 0.000 ppb             | 246 cps           | 31.8 %        |
| 169Tm (KED) | 0.000 ppb             | 1 cps             | 173.2 %       |
| 174Yb (KED) | 0.000 ppb             | 2 cps             | 86.6 %        |
| 175Lu (KED) | 0.000 ppb             | 0 cps             |               |
| 205Tl (KED) | 0.000 ppb             | 7 cps             | 50.0 %        |
| 208Pb (KED) | 0.000 ppb             | 13,840 cps        | 1.2 %         |
| 232Th (KED) | 0.000 ppb             | 219 cps           | 1.8 %         |
| 238U (KED)  | 0.000 ppb             | 70 cps            | 12.6 %        |

## Sample Summary

Instrument ID: iCAP Q

Analysis index: 3

Analysis name: std1

Analysis started at: 8/31/2021 4:16:56 PM

User name: WINDOWS-UPCI4ER\Administrator

| Category    | Concentration average | Concentration RSD |
|-------------|-----------------------|-------------------|
| 9Be (KED)   | 26.802 ppb            | 1.3 %             |
| 11B (KED)   | 28.978 ppb            | 4.9 %             |
| 24Mg (KED)  | 24.820 ppb            | 1.5 %             |
| 27Al (KED)  | 26.269 ppb            | 4.7 %             |
| 51V (KED)   | 25.779 ppb            | 1.5 %             |
| 52Cr (KED)  | 25.782 ppb            | 0.9 %             |
| 55Mn (KED)  | 25.605 ppb            | 1.3 %             |
| 56Fe (KED)  | 25.309 ppb            | 0.7 %             |
| 58Ni (KED)  | 25.772 ppb            | 2.2 %             |
| 59Co (KED)  | 25.813 ppb            | 1.6 %             |
| 63Cu (KED)  | 25.946 ppb            | 1.0 %             |
| 64Zn (KED)  | 26.501 ppb            | 1.7 %             |
| 69Ga (KED)  | 25.481 ppb            | 1.5 %             |
| 75As (KED)  | 26.326 ppb            | 1.8 %             |
| 80Se (KED)  | 26.947 ppb            | 3.1 %             |
| 85Rb (KED)  | 25.335 ppb            | 2.2 %             |
| 88Sr (KED)  | 24.937 ppb            | 1.8 %             |
| 107Ag (KED) | 25.967 ppb            | 0.7 %             |
| 114Cd (KED) | 25.855 ppb            | 1.1 %             |
| 133Cs (KED) | 25.096 ppb            | 1.1 %             |
| 138Ba (KED) | 24.766 ppb            | 1.1 %             |
| 139La (KED) | 25.425 ppb            | 3.8 %             |
| 140Ce (KED) | 25.696 ppb            | 0.9 %             |
| 141Pr (KED) | 25.627 ppb            | 1.1 %             |
| 142Nd (KED) | 25.009 ppb            | 2.6 %             |
| 152Sm (KED) | 25.406 ppb            | 1.1 %             |
| 153Eu (KED) | 26.089 ppb            | 1.9 %             |
| 158Gd (KED) | 25.573 ppb            | 1.7 %             |
| 164Dy (KED) | 25.386 ppb            | 3.1 %             |
| 165Ho (KED) | 24.412 ppb            | 1.8 %             |
| 166Er (KED) | 25.706 ppb            | 1.6 %             |
| 169Tm (KED) | 24.515 ppb            | 0.8 %             |
| 174Yb (KED) | 25.784 ppb            | 3.8 %             |
| 175Lu (KED) | 25.557 ppb            | 0.5 %             |
| 205Tl (KED) | 25.652 ppb            | 1.1 %             |
| 208Pb (KED) | 26.028 ppb            | 1.6 %             |
| 232Th (KED) | 24.240 ppb            | 2.4 %             |
| 238U (KED)  | 24.357 ppb            | 2.8 %             |

| Category   | Concentration average | Intensity average | Intensity RSD |
|------------|-----------------------|-------------------|---------------|
| 9Be (KED)  | 26.802 ppb            | 3,173 cps         | 1.3 %         |
| 11B (KED)  | 28.978 ppb            | 2,000 cps         | 4.4 %         |
| 24Mg (KED) | 24.820 ppb            | 11,008 cps        | 1.4 %         |
| 27Al (KED) | 26.269 ppb            | 2,689 cps         | 4.5 %         |
| 51V (KED)  | 25.779 ppb            | 163,854 cps       | 1.5 %         |
| 52Cr (KED) | 25.782 ppb            | 256,110 cps       | 0.9 %         |
| 55Mn (KED) | 25.605 ppb            | 119,478 cps       | 1.3 %         |
| 56Fe (KED) | 25.309 ppb            | 235,113 cps       | 0.7 %         |
| 58Ni (KED) | 25.772 ppb            | 314,634 cps       | 2.1 %         |
| 59Co (KED) | 25.813 ppb            | 508,639 cps       | 1.6 %         |

| Category    | Concentration average | Intensity average | Intensity RSD |
|-------------|-----------------------|-------------------|---------------|
| 63Cu (KED)  | 25.946 ppb            | 398,050 cps       | 1.0 %         |
| 64Zn (KED)  | 26.501 ppb            | 104,313 cps       | 1.6 %         |
| 69Ga (KED)  | 25.481 ppb            | 115,895 cps       | 1.5 %         |
| 75As (KED)  | 26.326 ppb            | 28,377 cps        | 1.8 %         |
| 80Se (KED)  | 26.947 ppb            | 9,091 cps         | 2.8 %         |
| 85Rb (KED)  | 25.335 ppb            | 103,421 cps       | 2.1 %         |
| 88Sr (KED)  | 24.937 ppb            | 140,770 cps       | 1.8 %         |
| 107Ag (KED) | 25.967 ppb            | 1,148,061 cps     | 0.7 %         |
| 114Cd (KED) | 25.855 ppb            | 410,349 cps       | 1.1 %         |
| 133Cs (KED) | 25.096 ppb            | 549,024 cps       | 1.1 %         |
| 138Ba (KED) | 24.766 ppb            | 790,816 cps       | 1.1 %         |
| 139La (KED) | 25.425 ppb            | 1,700,507 cps     | 3.8 %         |
| 140Ce (KED) | 25.696 ppb            | 2,350,812 cps     | 0.9 %         |
| 141Pr (KED) | 25.627 ppb            | 2,384,218 cps     | 1.1 %         |
| 142Nd (KED) | 25.009 ppb            | 975,404 cps       | 2.6 %         |
| 152Sm (KED) | 25.406 ppb            | 926,365 cps       | 1.1 %         |
| 153Eu (KED) | 26.089 ppb            | 1,826,191 cps     | 1.9 %         |
| 158Gd (KED) | 25.573 ppb            | 1,341,468 cps     | 1.7 %         |
| 164Dy (KED) | 25.386 ppb            | 1,431,829 cps     | 3.1 %         |
| 165Ho (KED) | 24.412 ppb            | 4,841,634 cps     | 1.8 %         |
| 166Er (KED) | 25.706 ppb            | 1,768,609 cps     | 1.6 %         |
| 169Tm (KED) | 24.515 ppb            | 5,605,103 cps     | 0.8 %         |
| 174Yb (KED) | 25.784 ppb            | 2,166,981 cps     | 3.8 %         |
| 175Lu (KED) | 25.557 ppb            | 3,169,268 cps     | 0.5 %         |
| 205Tl (KED) | 25.652 ppb            | 4,462,114 cps     | 1.1 %         |
| 208Pb (KED) | 26.028 ppb            | 3,204,517 cps     | 1.5 %         |
| 232Th (KED) | 24.240 ppb            | 5,645,238 cps     | 2.4 %         |
| 238U (KED)  | 24.357 ppb            | 6,605,028 cps     | 2.8 %         |

## Sample Summary

Instrument ID: iCAP Q

Analysis index: 4

Analysis name: std2

Analysis started at: 8/31/2021 4:20:09 PM

User name: WINDOWS-UPCI4ER\Administrator

| Category    | Concentration average | Concentration RSD |
|-------------|-----------------------|-------------------|
| 9Be (KED)   | 52.004 ppb            | 0.4 %             |
| 11B (KED)   | 50.467 ppb            | 3.9 %             |
| 24Mg (KED)  | 49.485 ppb            | 1.2 %             |
| 27Al (KED)  | 49.632 ppb            | 5.5 %             |
| 51V (KED)   | 49.889 ppb            | 1.0 %             |
| 52Cr (KED)  | 50.169 ppb            | 0.2 %             |
| 55Mn (KED)  | 49.682 ppb            | 0.3 %             |
| 56Fe (KED)  | 50.315 ppb            | 1.8 %             |
| 58Ni (KED)  | 50.279 ppb            | 1.3 %             |
| 59Co (KED)  | 50.248 ppb            | 0.8 %             |
| 63Cu (KED)  | 50.138 ppb            | 0.6 %             |
| 64Zn (KED)  | 49.854 ppb            | 0.6 %             |
| 69Ga (KED)  | 49.671 ppb            | 2.4 %             |
| 75As (KED)  | 49.879 ppb            | 0.3 %             |
| 80Se (KED)  | 50.256 ppb            | 1.1 %             |
| 85Rb (KED)  | 49.990 ppb            | 0.8 %             |
| 88Sr (KED)  | 49.884 ppb            | 1.3 %             |
| 107Ag (KED) | 51.331 ppb            | 1.3 %             |
| 114Cd (KED) | 49.899 ppb            | 1.3 %             |
| 133Cs (KED) | 50.251 ppb            | 0.5 %             |
| 138Ba (KED) | 50.485 ppb            | 1.0 %             |
| 139La (KED) | 51.185 ppb            | 1.3 %             |
| 140Ce (KED) | 48.975 ppb            | 1.1 %             |
| 141Pr (KED) | 49.924 ppb            | 1.1 %             |
| 142Nd (KED) | 49.874 ppb            | 2.8 %             |
| 152Sm (KED) | 50.201 ppb            | 0.7 %             |
| 153Eu (KED) | 52.018 ppb            | 0.8 %             |
| 158Gd (KED) | 51.520 ppb            | 2.7 %             |
| 164Dy (KED) | 50.903 ppb            | 5.2 %             |
| 165Ho (KED) | 49.284 ppb            | 1.2 %             |
| 166Er (KED) | 51.248 ppb            | 2.0 %             |
| 169Tm (KED) | 49.464 ppb            | 1.0 %             |
| 174Yb (KED) | 49.920 ppb            | 2.9 %             |
| 175Lu (KED) | 49.191 ppb            | 1.7 %             |
| 205Tl (KED) | 50.102 ppb            | 2.4 %             |
| 208Pb (KED) | 49.432 ppb            | 2.1 %             |
| 232Th (KED) | 49.195 ppb            | 3.7 %             |
| 238U (KED)  | 50.301 ppb            | 3.2 %             |

| Category   | Concentration average | Intensity average | Intensity RSD |
|------------|-----------------------|-------------------|---------------|
| 9Be (KED)  | 52.004 ppb            | 6,156 cps         | 0.4 %         |
| 11B (KED)  | 50.467 ppb            | 3,352 cps         | 3.7 %         |
| 24Mg (KED) | 49.485 ppb            | 21,229 cps        | 1.2 %         |
| 27Al (KED) | 49.632 ppb            | 5,009 cps         | 5.4 %         |
| 51V (KED)  | 49.889 ppb            | 317,091 cps       | 1.0 %         |
| 52Cr (KED) | 50.169 ppb            | 498,165 cps       | 0.2 %         |
| 55Mn (KED) | 49.682 ppb            | 231,643 cps       | 0.3 %         |
| 56Fe (KED) | 50.315 ppb            | 461,302 cps       | 1.8 %         |
| 58Ni (KED) | 50.279 ppb            | 611,588 cps       | 1.3 %         |
| 59Co (KED) | 50.248 ppb            | 990,116 cps       | 0.8 %         |

| Category    | Concentration average | Intensity average | Intensity RSD |
|-------------|-----------------------|-------------------|---------------|
| 63Cu (KED)  | 50.138 ppb            | 766,200 cps       | 0.6 %         |
| 64Zn (KED)  | 49.854 ppb            | 190,003 cps       | 0.6 %         |
| 69Ga (KED)  | 49.671 ppb            | 225,371 cps       | 2.4 %         |
| 75As (KED)  | 49.879 ppb            | 53,746 cps        | 0.2 %         |
| 80Se (KED)  | 50.256 ppb            | 16,397 cps        | 1.1 %         |
| 85Rb (KED)  | 49.990 ppb            | 204,007 cps       | 0.8 %         |
| 88Sr (KED)  | 49.884 ppb            | 281,384 cps       | 1.3 %         |
| 107Ag (KED) | 51.331 ppb            | 2,269,268 cps     | 1.3 %         |
| 114Cd (KED) | 49.899 ppb            | 791,612 cps       | 1.3 %         |
| 133Cs (KED) | 50.251 ppb            | 1,099,318 cps     | 0.5 %         |
| 138Ba (KED) | 50.485 ppb            | 1,601,250 cps     | 0.9 %         |
| 139La (KED) | 51.185 ppb            | 3,423,415 cps     | 1.3 %         |
| 140Ce (KED) | 48.975 ppb            | 4,480,336 cps     | 1.1 %         |
| 141Pr (KED) | 49.924 ppb            | 4,644,575 cps     | 1.1 %         |
| 142Nd (KED) | 49.874 ppb            | 1,945,108 cps     | 2.8 %         |
| 152Sm (KED) | 50.201 ppb            | 1,830,443 cps     | 0.7 %         |
| 153Eu (KED) | 52.018 ppb            | 3,641,136 cps     | 0.8 %         |
| 158Gd (KED) | 51.520 ppb            | 2,702,557 cps     | 2.7 %         |
| 164Dy (KED) | 50.903 ppb            | 2,870,956 cps     | 5.2 %         |
| 165Ho (KED) | 49.284 ppb            | 9,774,619 cps     | 1.2 %         |
| 166Er (KED) | 51.248 ppb            | 3,525,646 cps     | 2.0 %         |
| 169Tm (KED) | 49.464 ppb            | 11,309,290 cps    | 1.0 %         |
| 174Yb (KED) | 49.920 ppb            | 4,195,542 cps     | 2.9 %         |
| 175Lu (KED) | 49.191 ppb            | 6,100,050 cps     | 1.7 %         |
| 205Tl (KED) | 50.102 ppb            | 8,715,038 cps     | 2.4 %         |
| 208Pb (KED) | 49.432 ppb            | 6,073,575 cps     | 2.1 %         |
| 232Th (KED) | 49.195 ppb            | 11,456,786 cps    | 3.7 %         |
| 238U (KED)  | 50.301 ppb            | 13,640,100 cps    | 3.2 %         |

## Sample Summary

Instrument ID: iCAP Q

Analysis index: 5

Analysis name: std3

Analysis started at: 8/31/2021 4:23:16 PM

User name: WINDOWS-UPCI4ER\Administrator

| Category    | Concentration average | Concentration RSD |
|-------------|-----------------------|-------------------|
| 9Be (KED)   | 98.547 ppb            | 1.5 %             |
| 11B (KED)   | 98.772 ppb            | 0.4 %             |
| 24Mg (KED)  | 100.303 ppb           | 0.9 %             |
| 27Al (KED)  | 99.867 ppb            | 1.1 %             |
| 51V (KED)   | 99.861 ppb            | 0.5 %             |
| 52Cr (KED)  | 99.720 ppb            | 1.4 %             |
| 55Mn (KED)  | 100.008 ppb           | 2.2 %             |
| 56Fe (KED)  | 99.765 ppb            | 0.5 %             |
| 58Ni (KED)  | 99.668 ppb            | 1.3 %             |
| 59Co (KED)  | 99.673 ppb            | 2.7 %             |
| 63Cu (KED)  | 99.695 ppb            | 1.3 %             |
| 64Zn (KED)  | 99.698 ppb            | 0.2 %             |
| 69Ga (KED)  | 100.044 ppb           | 0.7 %             |
| 75As (KED)  | 99.729 ppb            | 1.2 %             |
| 80Se (KED)  | 99.385 ppb            | 1.5 %             |
| 85Rb (KED)  | 99.921 ppb            | 0.5 %             |
| 88Sr (KED)  | 100.074 ppb           | 1.2 %             |
| 107Ag (KED) | 99.093 ppb            | 0.8 %             |
| 114Cd (KED) | 99.837 ppb            | 2.5 %             |
| 133Cs (KED) | 99.851 ppb            | 0.7 %             |
| 138Ba (KED) | 99.816 ppb            | 1.9 %             |
| 139La (KED) | 99.302 ppb            | 2.3 %             |
| 140Ce (KED) | 100.339 ppb           | 1.7 %             |
| 141Pr (KED) | 99.881 ppb            | 0.7 %             |
| 142Nd (KED) | 100.061 ppb           | 1.2 %             |
| 152Sm (KED) | 99.798 ppb            | 3.1 %             |
| 153Eu (KED) | 98.719 ppb            | 2.6 %             |
| 158Gd (KED) | 99.097 ppb            | 0.8 %             |
| 164Dy (KED) | 99.452 ppb            | 2.0 %             |
| 165Ho (KED) | 100.505 ppb           | 3.0 %             |
| 166Er (KED) | 99.200 ppb            | 2.5 %             |
| 169Tm (KED) | 100.389 ppb           | 1.7 %             |
| 174Yb (KED) | 99.844 ppb            | 0.7 %             |
| 175Lu (KED) | 100.265 ppb           | 2.5 %             |
| 205Tl (KED) | 99.786 ppb            | 2.7 %             |
| 208Pb (KED) | 100.027 ppb           | 1.0 %             |
| 232Th (KED) | 100.593 ppb           | 2.1 %             |
| 238U (KED)  | 100.010 ppb           | 2.1 %             |

| Category   | Concentration average | Intensity average | Intensity RSD |
|------------|-----------------------|-------------------|---------------|
| 9Be (KED)  | 98.547 ppb            | 11,665 cps        | 1.5 %         |
| 11B (KED)  | 98.772 ppb            | 6,389 cps         | 0.4 %         |
| 24Mg (KED) | 100.303 ppb           | 42,287 cps        | 0.9 %         |
| 27Al (KED) | 99.867 ppb            | 9,996 cps         | 1.0 %         |
| 51V (KED)  | 99.861 ppb            | 634,713 cps       | 0.5 %         |
| 52Cr (KED) | 99.720 ppb            | 989,997 cps       | 1.4 %         |
| 55Mn (KED) | 100.008 ppb           | 466,093 cps       | 2.2 %         |
| 56Fe (KED) | 99.765 ppb            | 908,588 cps       | 0.5 %         |
| 58Ni (KED) | 99.668 ppb            | 1,210,040 cps     | 1.3 %         |
| 59Co (KED) | 99.673 ppb            | 1,964,019 cps     | 2.7 %         |

| Category    | Concentration average | Intensity average | Intensity RSD |
|-------------|-----------------------|-------------------|---------------|
| 63Cu (KED)  | 99.695 ppb            | 1,520,383 cps     | 1.3 %         |
| 64Zn (KED)  | 99.698 ppb            | 372,897 cps       | 0.2 %         |
| 69Ga (KED)  | 100.044 ppb           | 453,344 cps       | 0.7 %         |
| 75As (KED)  | 99.729 ppb            | 107,437 cps       | 1.2 %         |
| 80Se (KED)  | 99.385 ppb            | 31,797 cps        | 1.5 %         |
| 85Rb (KED)  | 99.921 ppb            | 407,716 cps       | 0.5 %         |
| 88Sr (KED)  | 100.074 ppb           | 564,276 cps       | 1.2 %         |
| 107Ag (KED) | 99.093 ppb            | 4,380,605 cps     | 0.8 %         |
| 114Cd (KED) | 99.837 ppb            | 1,583,488 cps     | 2.5 %         |
| 133Cs (KED) | 99.851 ppb            | 2,184,396 cps     | 0.7 %         |
| 138Ba (KED) | 99.816 ppb            | 3,155,710 cps     | 1.9 %         |
| 139La (KED) | 99.302 ppb            | 6,641,603 cps     | 2.3 %         |
| 140Ce (KED) | 100.339 ppb           | 9,179,081 cps     | 1.7 %         |
| 141Pr (KED) | 99.881 ppb            | 9,292,273 cps     | 0.7 %         |
| 142Nd (KED) | 100.061 ppb           | 3,902,409 cps     | 1.2 %         |
| 152Sm (KED) | 99.798 ppb            | 3,638,901 cps     | 3.1 %         |
| 153Eu (KED) | 98.719 ppb            | 6,910,146 cps     | 2.6 %         |
| 158Gd (KED) | 99.097 ppb            | 5,198,217 cps     | 0.8 %         |
| 164Dy (KED) | 99.452 ppb            | 5,609,186 cps     | 2.0 %         |
| 165Ho (KED) | 100.505 ppb           | 19,933,598 cps    | 3.0 %         |
| 166Er (KED) | 99.200 ppb            | 6,824,323 cps     | 2.5 %         |
| 169Tm (KED) | 100.389 ppb           | 22,952,870 cps    | 1.7 %         |
| 174Yb (KED) | 99.844 ppb            | 8,391,320 cps     | 0.7 %         |
| 175Lu (KED) | 100.265 ppb           | 12,433,504 cps    | 2.5 %         |
| 205Tl (KED) | 99.786 ppb            | 17,357,505 cps    | 2.7 %         |
| 208Pb (KED) | 100.027 ppb           | 12,275,791 cps    | 1.0 %         |
| 232Th (KED) | 100.593 ppb           | 23,426,462 cps    | 2.1 %         |
| 238U (KED)  | 100.010 ppb           | 27,119,568 cps    | 2.1 %         |

## Sample Summary

Instrument ID: iCAP Q

Analysis index: 6

Analysis name: 18110jian

Analysis started at: 8/31/2021 4:26:30 PM

User name: WINDOWS-UPCI4ER\Administrator

| Category    | Concentration average | Concentration RSD |
|-------------|-----------------------|-------------------|
| 9Be (KED)   | 0.066 ppb             | 24.7 %            |
| 11B (KED)   | 1.272 ppb             | 48.7 %            |
| 24Mg (KED)  | 433.150 ppb           | 2.3 %             |
| 27Al (KED)  | 485.286 ppb           | 4.1 %             |
| 51V (KED)   | 0.890 ppb             | 7.1 %             |
| 52Cr (KED)  | 2.880 ppb             | 2.7 %             |
| 55Mn (KED)  | 13.929 ppb            | 3.4 %             |
| 56Fe (KED)  | 471.966 ppb           | 1.9 %             |
| 58Ni (KED)  | 2.487 ppb             | 2.8 %             |
| 59Co (KED)  | 0.241 ppb             | 2.0 %             |
| 63Cu (KED)  | 7.608 ppb             | 1.7 %             |
| 64Zn (KED)  | 175.107 ppb           | 1.0 %             |
| 69Ga (KED)  | 1.655 ppb             | 1.7 %             |
| 75As (KED)  | 0.829 ppb             | 1.9 %             |
| 80Se (KED)  | 1.351 ppb             | 30.4 %            |
| 85Rb (KED)  | 1.499 ppb             | 2.4 %             |
| 88Sr (KED)  | 5.811 ppb             | 0.8 %             |
| 107Ag (KED) | 0.080 ppb             | 16.2 %            |
| 114Cd (KED) | 0.170 ppb             | 2.1 %             |
| 133Cs (KED) | 0.136 ppb             | 10.1 %            |
| 138Ba (KED) | 6.747 ppb             | 0.7 %             |
| 139La (KED) | 0.476 ppb             | 3.1 %             |
| 140Ce (KED) | 0.917 ppb             | 1.4 %             |
| 141Pr (KED) | 0.123 ppb             | 11.9 %            |
| 142Nd (KED) | 0.560 ppb             | 1.8 %             |
| 152Sm (KED) | 0.091 ppb             | 11.0 %            |
| 153Eu (KED) | 0.033 ppb             | 40.7 %            |
| 158Gd (KED) | 0.083 ppb             | 14.8 %            |
| 164Dy (KED) | 0.063 ppb             | 21.6 %            |
| 165Ho (KED) | 0.026 ppb             | 52.2 %            |
| 166Er (KED) | 0.036 ppb             | 38.2 %            |
| 169Tm (KED) | 0.020 ppb             | 69.6 %            |
| 174Yb (KED) | 0.034 ppb             | 36.6 %            |
| 175Lu (KED) | 0.019 ppb             | 66.7 %            |
| 205Tl (KED) | 0.034 ppb             | 41.7 %            |
| 208Pb (KED) | 2.179 ppb             | 2.2 %             |
| 232Th (KED) | 0.305 ppb             | 16.0 %            |
| 238U (KED)  | 0.057 ppb             | 28.2 %            |

| Category   | Concentration average | Intensity average | Intensity RSD |
|------------|-----------------------|-------------------|---------------|
| 9Be (KED)  | 0.066 ppb             | 8 cps             | 24.7 %        |
| 11B (KED)  | 1.272 ppb             | 258 cps           | 15.1 %        |
| 24Mg (KED) | 433.150 ppb           | 180,214 cps       | 2.3 %         |
| 27Al (KED) | 485.286 ppb           | 48,262 cps        | 4.1 %         |
| 51V (KED)  | 0.890 ppb             | 5,660 cps         | 7.1 %         |
| 52Cr (KED) | 2.880 ppb             | 28,798 cps        | 2.6 %         |
| 55Mn (KED) | 13.929 ppb            | 65,083 cps        | 3.4 %         |
| 56Fe (KED) | 471.966 ppb           | 4,275,238 cps     | 1.9 %         |
| 58Ni (KED) | 2.487 ppb             | 32,488 cps        | 2.6 %         |
| 59Co (KED) | 0.241 ppb             | 4,753 cps         | 2.0 %         |

| Category    | Concentration average | Intensity average | Intensity RSD |
|-------------|-----------------------|-------------------|---------------|
| 63Cu (KED)  | 7.608 ppb             | 118,972 cps       | 1.6 %         |
| 64Zn (KED)  | 175.107 ppb           | 649,603 cps       | 1.0 %         |
| 69Ga (KED)  | 1.655 ppb             | 8,068 cps         | 1.6 %         |
| 75As (KED)  | 0.829 ppb             | 916 cps           | 1.9 %         |
| 80Se (KED)  | 1.351 ppb             | 1,068 cps         | 12.1 %        |
| 85Rb (KED)  | 1.499 ppb             | 6,175 cps         | 2.4 %         |
| 88Sr (KED)  | 5.811 ppb             | 32,966 cps        | 0.8 %         |
| 107Ag (KED) | 0.080 ppb             | 3,697 cps         | 15.5 %        |
| 114Cd (KED) | 0.170 ppb             | 3,055 cps         | 1.9 %         |
| 133Cs (KED) | 0.136 ppb             | 2,988 cps         | 10.0 %        |
| 138Ba (KED) | 6.747 ppb             | 222,999 cps       | 0.7 %         |
| 139La (KED) | 0.476 ppb             | 31,880 cps        | 3.1 %         |
| 140Ce (KED) | 0.917 ppb             | 84,040 cps        | 1.4 %         |
| 141Pr (KED) | 0.123 ppb             | 11,471 cps        | 11.8 %        |
| 142Nd (KED) | 0.560 ppb             | 21,871 cps        | 1.8 %         |
| 152Sm (KED) | 0.091 ppb             | 3,322 cps         | 11.0 %        |
| 153Eu (KED) | 0.033 ppb             | 2,304 cps         | 40.7 %        |
| 158Gd (KED) | 0.083 ppb             | 4,382 cps         | 14.8 %        |
| 164Dy (KED) | 0.063 ppb             | 3,551 cps         | 21.5 %        |
| 165Ho (KED) | 0.026 ppb             | 5,124 cps         | 52.1 %        |
| 166Er (KED) | 0.036 ppb             | 2,714 cps         | 34.7 %        |
| 169Tm (KED) | 0.020 ppb             | 4,582 cps         | 69.6 %        |
| 174Yb (KED) | 0.034 ppb             | 2,837 cps         | 36.6 %        |
| 175Lu (KED) | 0.019 ppb             | 2,388 cps         | 66.7 %        |
| 205Tl (KED) | 0.034 ppb             | 5,884 cps         | 41.6 %        |
| 208Pb (KED) | 2.179 ppb             | 281,009 cps       | 2.1 %         |
| 232Th (KED) | 0.305 ppb             | 71,223 cps        | 16.0 %        |
| 238U (KED)  | 0.057 ppb             | 15,550 cps        | 28.1 %        |

## Sample Summary

Instrument ID: iCAP Q

Analysis index: 7

Analysis name: 17426jian

Analysis started at: 8/31/2021 4:29:36 PM

User name: WINDOWS-UPCI4ER\Administrator

| Category    | Concentration average | Concentration RSD |
|-------------|-----------------------|-------------------|
| 9Be (KED)   | 0.019 ppb             | 86.6 %            |
| 11B (KED)   | 3.463 ppb             | 23.4 %            |
| 24Mg (KED)  | 328.459 ppb           | 2.6 %             |
| 27Al (KED)  | 411.833 ppb           | 1.1 %             |
| 51V (KED)   | 0.750 ppb             | 3.9 %             |
| 52Cr (KED)  | 4.544 ppb             | 1.7 %             |
| 55Mn (KED)  | 10.914 ppb            | 0.9 %             |
| 56Fe (KED)  | 380.573 ppb           | 1.3 %             |
| 58Ni (KED)  | 2.011 ppb             | 3.2 %             |
| 59Co (KED)  | 0.192 ppb             | 2.7 %             |
| 63Cu (KED)  | 4.521 ppb             | 1.3 %             |
| 64Zn (KED)  | 189.885 ppb           | 1.0 %             |
| 69Ga (KED)  | 1.108 ppb             | 1.3 %             |
| 75As (KED)  | 0.972 ppb             | 8.2 %             |
| 80Se (KED)  | 2.240 ppb             | 5.9 %             |
| 85Rb (KED)  | 1.282 ppb             | 2.1 %             |
| 88Sr (KED)  | 4.300 ppb             | 1.3 %             |
| 107Ag (KED) | 0.069 ppb             | 7.9 %             |
| 114Cd (KED) | 0.211 ppb             | 2.7 %             |
| 133Cs (KED) | 0.083 ppb             | 3.3 %             |
| 138Ba (KED) | 4.162 ppb             | 1.2 %             |
| 139La (KED) | 0.344 ppb             | 0.8 %             |
| 140Ce (KED) | 0.681 ppb             | 1.1 %             |
| 141Pr (KED) | 0.080 ppb             | 3.1 %             |
| 142Nd (KED) | 0.412 ppb             | 1.0 %             |
| 152Sm (KED) | 0.055 ppb             | 2.9 %             |
| 153Eu (KED) | 0.013 ppb             | 9.1 %             |
| 158Gd (KED) | 0.048 ppb             | 1.2 %             |
| 164Dy (KED) | 0.033 ppb             | 2.2 %             |
| 165Ho (KED) | 0.008 ppb             | 8.5 %             |
| 166Er (KED) | 0.017 ppb             | 9.4 %             |
| 169Tm (KED) | 0.004 ppb             | 30.3 %            |
| 174Yb (KED) | 0.015 ppb             | 8.2 %             |
| 175Lu (KED) | 0.004 ppb             | 29.1 %            |
| 205Tl (KED) | 0.013 ppb             | 5.0 %             |
| 208Pb (KED) | 1.801 ppb             | 0.4 %             |
| 232Th (KED) | 0.132 ppb             | 3.6 %             |
| 238U (KED)  | 0.030 ppb             | 2.6 %             |

| Category   | Concentration average | Intensity average | Intensity RSD |
|------------|-----------------------|-------------------|---------------|
| 9Be (KED)  | 0.019 ppb             | 2 cps             | 86.6 %        |
| 11B (KED)  | 3.463 ppb             | 396 cps           | 12.9 %        |
| 24Mg (KED) | 328.459 ppb           | 136,831 cps       | 2.6 %         |
| 27Al (KED) | 411.833 ppb           | 40,969 cps        | 1.1 %         |
| 51V (KED)  | 0.750 ppb             | 4,770 cps         | 3.9 %         |
| 52Cr (KED) | 4.544 ppb             | 45,310 cps        | 1.7 %         |
| 55Mn (KED) | 10.914 ppb            | 51,041 cps        | 0.9 %         |
| 56Fe (KED) | 380.573 ppb           | 3,448,568 cps     | 1.3 %         |
| 58Ni (KED) | 2.011 ppb             | 26,717 cps        | 2.9 %         |
| 59Co (KED) | 0.192 ppb             | 3,795 cps         | 2.7 %         |

| Category    | Concentration average | Intensity average | Intensity RSD |
|-------------|-----------------------|-------------------|---------------|
| 63Cu (KED)  | 4.521 ppb             | 71,989 cps        | 1.2 %         |
| 64Zn (KED)  | 189.885 ppb           | 703,829 cps       | 1.0 %         |
| 69Ga (KED)  | 1.108 ppb             | 5,591 cps         | 1.2 %         |
| 75As (KED)  | 0.972 ppb             | 1,069 cps         | 8.0 %         |
| 80Se (KED)  | 2.240 ppb             | 1,347 cps         | 3.1 %         |
| 85Rb (KED)  | 1.282 ppb             | 5,288 cps         | 2.1 %         |
| 88Sr (KED)  | 4.300 ppb             | 24,448 cps        | 1.3 %         |
| 107Ag (KED) | 0.069 ppb             | 3,229 cps         | 7.5 %         |
| 114Cd (KED) | 0.211 ppb             | 3,703 cps         | 2.5 %         |
| 133Cs (KED) | 0.083 ppb             | 1,827 cps         | 3.3 %         |
| 138Ba (KED) | 4.162 ppb             | 141,555 cps       | 1.1 %         |
| 139La (KED) | 0.344 ppb             | 23,050 cps        | 0.8 %         |
| 140Ce (KED) | 0.681 ppb             | 62,389 cps        | 1.1 %         |
| 141Pr (KED) | 0.080 ppb             | 7,438 cps         | 3.1 %         |
| 142Nd (KED) | 0.412 ppb             | 16,093 cps        | 1.0 %         |
| 152Sm (KED) | 0.055 ppb             | 2,026 cps         | 2.9 %         |
| 153Eu (KED) | 0.013 ppb             | 902 cps           | 9.1 %         |
| 158Gd (KED) | 0.048 ppb             | 2,525 cps         | 1.2 %         |
| 164Dy (KED) | 0.033 ppb             | 1,861 cps         | 2.1 %         |
| 165Ho (KED) | 0.008 ppb             | 1,680 cps         | 8.5 %         |
| 166Er (KED) | 0.017 ppb             | 1,393 cps         | 7.7 %         |
| 169Tm (KED) | 0.004 ppb             | 852 cps           | 30.3 %        |
| 174Yb (KED) | 0.015 ppb             | 1,242 cps         | 8.2 %         |
| 175Lu (KED) | 0.004 ppb             | 454 cps           | 29.1 %        |
| 205Tl (KED) | 0.013 ppb             | 2,261 cps         | 5.0 %         |
| 208Pb (KED) | 1.801 ppb             | 234,592 cps       | 0.4 %         |
| 232Th (KED) | 0.132 ppb             | 31,029 cps        | 3.6 %         |
| 238U (KED)  | 0.030 ppb             | 8,192 cps         | 2.6 %         |

## Sample Summary

Instrument ID: iCAP Q

Analysis index: 8

Analysis name: 18052jian

Analysis started at: 8/31/2021 4:32:39 PM

User name: WINDOWS-UPCI4ER\Administrator

| Category    | Concentration average | Concentration RSD |
|-------------|-----------------------|-------------------|
| 9Be (KED)   | 0.028 ppb             | 0.0 %             |
| 11B (KED)   | 12.456 ppb            | 12.5 %            |
| 24Mg (KED)  | 750.723 ppb           | 1.5 %             |
| 27Al (KED)  | 914.109 ppb           | 0.3 %             |
| 51V (KED)   | 1.728 ppb             | 2.5 %             |
| 52Cr (KED)  | 5.315 ppb             | 1.8 %             |
| 55Mn (KED)  | 25.608 ppb            | 0.6 %             |
| 56Fe (KED)  | 918.002 ppb           | 1.0 %             |
| 58Ni (KED)  | 4.148 ppb             | 1.0 %             |
| 59Co (KED)  | 0.431 ppb             | 8.0 %             |
| 63Cu (KED)  | 8.337 ppb             | 0.6 %             |
| 64Zn (KED)  | 195.548 ppb           | 0.8 %             |
| 69Ga (KED)  | 2.954 ppb             | 4.6 %             |
| 75As (KED)  | 0.966 ppb             | 6.7 %             |
| 80Se (KED)  | 1.549 ppb             | 9.0 %             |
| 85Rb (KED)  | 2.902 ppb             | 3.1 %             |
| 88Sr (KED)  | 8.360 ppb             | 2.3 %             |
| 107Ag (KED) | 0.078 ppb             | 5.9 %             |
| 114Cd (KED) | 0.134 ppb             | 6.6 %             |
| 133Cs (KED) | 0.199 ppb             | 4.4 %             |
| 138Ba (KED) | 9.538 ppb             | 2.6 %             |
| 139La (KED) | 0.759 ppb             | 0.1 %             |
| 140Ce (KED) | 1.514 ppb             | 1.3 %             |
| 141Pr (KED) | 0.174 ppb             | 2.5 %             |
| 142Nd (KED) | 0.886 ppb             | 3.0 %             |
| 152Sm (KED) | 0.122 ppb             | 2.5 %             |
| 153Eu (KED) | 0.026 ppb             | 4.5 %             |
| 158Gd (KED) | 0.105 ppb             | 1.9 %             |
| 164Dy (KED) | 0.075 ppb             | 2.0 %             |
| 165Ho (KED) | 0.015 ppb             | 8.7 %             |
| 166Er (KED) | 0.035 ppb             | 3.6 %             |
| 169Tm (KED) | 0.006 ppb             | 11.4 %            |
| 174Yb (KED) | 0.029 ppb             | 4.8 %             |
| 175Lu (KED) | 0.005 ppb             | 8.5 %             |
| 205Tl (KED) | 0.017 ppb             | 2.9 %             |
| 208Pb (KED) | 1.312 ppb             | 0.5 %             |
| 232Th (KED) | 0.229 ppb             | 3.6 %             |
| 238U (KED)  | 0.048 ppb             | 5.4 %             |

| Category   | Concentration average | Intensity average | Intensity RSD |
|------------|-----------------------|-------------------|---------------|
| 9Be (KED)  | 0.028 ppb             | 3 cps             | 0.0 %         |
| 11B (KED)  | 12.456 ppb            | 961 cps           | 10.1 %        |
| 24Mg (KED) | 750.723 ppb           | 311,810 cps       | 1.5 %         |
| 27Al (KED) | 914.109 ppb           | 90,837 cps        | 0.3 %         |
| 51V (KED)  | 1.728 ppb             | 10,984 cps        | 2.5 %         |
| 52Cr (KED) | 5.315 ppb             | 52,968 cps        | 1.8 %         |
| 55Mn (KED) | 25.608 ppb            | 119,490 cps       | 0.6 %         |
| 56Fe (KED) | 918.002 ppb           | 8,309,739 cps     | 1.0 %         |
| 58Ni (KED) | 4.148 ppb             | 52,616 cps        | 1.0 %         |
| 59Co (KED) | 0.431 ppb             | 8,496 cps         | 8.0 %         |

| Category    | Concentration average | Intensity average | Intensity RSD |
|-------------|-----------------------|-------------------|---------------|
| 63Cu (KED)  | 8.337 ppb             | 130,062 cps       | 0.6 %         |
| 64Zn (KED)  | 195.548 ppb           | 724,607 cps       | 0.8 %         |
| 69Ga (KED)  | 2.954 ppb             | 13,948 cps        | 4.4 %         |
| 75As (KED)  | 0.966 ppb             | 1,062 cps         | 6.5 %         |
| 80Se (KED)  | 1.549 ppb             | 1,130 cps         | 3.9 %         |
| 85Rb (KED)  | 2.902 ppb             | 11,898 cps        | 3.1 %         |
| 88Sr (KED)  | 8.360 ppb             | 47,331 cps        | 2.3 %         |
| 107Ag (KED) | 0.078 ppb             | 3,625 cps         | 5.6 %         |
| 114Cd (KED) | 0.134 ppb             | 2,472 cps         | 5.6 %         |
| 133Cs (KED) | 0.199 ppb             | 4,362 cps         | 4.4 %         |
| 138Ba (KED) | 9.538 ppb             | 310,960 cps       | 2.5 %         |
| 139La (KED) | 0.759 ppb             | 50,825 cps        | 0.1 %         |
| 140Ce (KED) | 1.514 ppb             | 138,672 cps       | 1.3 %         |
| 141Pr (KED) | 0.174 ppb             | 16,261 cps        | 2.5 %         |
| 142Nd (KED) | 0.886 ppb             | 34,605 cps        | 3.0 %         |
| 152Sm (KED) | 0.122 ppb             | 4,453 cps         | 2.5 %         |
| 153Eu (KED) | 0.026 ppb             | 1,853 cps         | 4.5 %         |
| 158Gd (KED) | 0.105 ppb             | 5,523 cps         | 1.9 %         |
| 164Dy (KED) | 0.075 ppb             | 4,235 cps         | 2.0 %         |
| 165Ho (KED) | 0.015 ppb             | 2,923 cps         | 8.7 %         |
| 166Er (KED) | 0.035 ppb             | 2,676 cps         | 3.3 %         |
| 169Tm (KED) | 0.006 ppb             | 1,320 cps         | 11.4 %        |
| 174Yb (KED) | 0.029 ppb             | 2,465 cps         | 4.8 %         |
| 175Lu (KED) | 0.005 ppb             | 614 cps           | 8.5 %         |
| 205Tl (KED) | 0.017 ppb             | 2,973 cps         | 2.9 %         |
| 208Pb (KED) | 1.312 ppb             | 174,629 cps       | 0.5 %         |
| 232Th (KED) | 0.229 ppb             | 53,534 cps        | 3.6 %         |
| 238U (KED)  | 0.048 ppb             | 13,126 cps        | 5.4 %         |

## Sample Summary

Instrument ID: iCAP Q

Analysis index: 9

Analysis name: 18062jian

Analysis started at: 8/31/2021 4:35:50 PM

User name: WINDOWS-UPCI4ER\Administrator

| Category    | Concentration average | Concentration RSD |
|-------------|-----------------------|-------------------|
| 9Be (KED)   | 0.019 ppb             | 173.2 %           |
| 11B (KED)   | 3.975 ppb             | 6.8 %             |
| 24Mg (KED)  | 580.102 ppb           | 1.0 %             |
| 27Al (KED)  | 631.072 ppb           | 1.3 %             |
| 51V (KED)   | 1.177 ppb             | 2.4 %             |
| 52Cr (KED)  | 4.226 ppb             | 1.2 %             |
| 55Mn (KED)  | 18.121 ppb            | 1.0 %             |
| 56Fe (KED)  | 581.981 ppb           | 1.6 %             |
| 58Ni (KED)  | 2.705 ppb             | 0.2 %             |
| 59Co (KED)  | 0.369 ppb             | 3.0 %             |
| 63Cu (KED)  | 12.258 ppb            | 0.8 %             |
| 64Zn (KED)  | 195.588 ppb           | 0.3 %             |
| 69Ga (KED)  | 2.062 ppb             | 1.1 %             |
| 75As (KED)  | 0.670 ppb             | 2.8 %             |
| 80Se (KED)  | 1.443 ppb             | 11.6 %            |
| 85Rb (KED)  | 2.092 ppb             | 2.1 %             |
| 88Sr (KED)  | 6.516 ppb             | 2.8 %             |
| 107Ag (KED) | 0.066 ppb             | 1.0 %             |
| 114Cd (KED) | 0.122 ppb             | 3.0 %             |
| 133Cs (KED) | 0.116 ppb             | 0.1 %             |
| 138Ba (KED) | 6.229 ppb             | 0.9 %             |
| 139La (KED) | 0.481 ppb             | 1.6 %             |
| 140Ce (KED) | 0.950 ppb             | 0.9 %             |
| 141Pr (KED) | 0.110 ppb             | 2.4 %             |
| 142Nd (KED) | 0.568 ppb             | 1.2 %             |
| 152Sm (KED) | 0.076 ppb             | 2.4 %             |
| 153Eu (KED) | 0.016 ppb             | 2.6 %             |
| 158Gd (KED) | 0.065 ppb             | 4.2 %             |
| 164Dy (KED) | 0.046 ppb             | 1.5 %             |
| 165Ho (KED) | 0.009 ppb             | 4.5 %             |
| 166Er (KED) | 0.021 ppb             | 7.1 %             |
| 169Tm (KED) | 0.003 ppb             | 11.9 %            |
| 174Yb (KED) | 0.018 ppb             | 3.6 %             |
| 175Lu (KED) | 0.003 ppb             | 12.7 %            |
| 205Tl (KED) | 0.013 ppb             | 4.4 %             |
| 208Pb (KED) | 1.455 ppb             | 4.5 %             |
| 232Th (KED) | 0.142 ppb             | 1.0 %             |
| 238U (KED)  | 0.036 ppb             | 2.7 %             |

| Category   | Concentration average | Intensity average | Intensity RSD |
|------------|-----------------------|-------------------|---------------|
| 9Be (KED)  | 0.019 ppb             | 2 cps             | 173.2 %       |
| 11B (KED)  | 3.975 ppb             | 428 cps           | 4.0 %         |
| 24Mg (KED) | 580.102 ppb           | 241,108 cps       | 1.0 %         |
| 27Al (KED) | 631.072 ppb           | 62,736 cps        | 1.3 %         |
| 51V (KED)  | 1.177 ppb             | 7,480 cps         | 2.4 %         |
| 52Cr (KED) | 4.226 ppb             | 42,162 cps        | 1.1 %         |
| 55Mn (KED) | 18.121 ppb            | 84,615 cps        | 1.0 %         |
| 56Fe (KED) | 581.981 ppb           | 5,270,347 cps     | 1.6 %         |
| 58Ni (KED) | 2.705 ppb             | 35,126 cps        | 0.2 %         |
| 59Co (KED) | 0.369 ppb             | 7,289 cps         | 3.0 %         |

| Category    | Concentration average | Intensity average | Intensity RSD |
|-------------|-----------------------|-------------------|---------------|
| 63Cu (KED)  | 12.258 ppb            | 189,738 cps       | 0.8 %         |
| 64Zn (KED)  | 195.588 ppb           | 724,755 cps       | 0.3 %         |
| 69Ga (KED)  | 2.062 ppb             | 9,909 cps         | 1.1 %         |
| 75As (KED)  | 0.670 ppb             | 743 cps           | 2.7 %         |
| 80Se (KED)  | 1.443 ppb             | 1,097 cps         | 4.8 %         |
| 85Rb (KED)  | 2.092 ppb             | 8,592 cps         | 2.1 %         |
| 88Sr (KED)  | 6.516 ppb             | 36,939 cps        | 2.8 %         |
| 107Ag (KED) | 0.066 ppb             | 3,106 cps         | 0.9 %         |
| 114Cd (KED) | 0.122 ppb             | 2,289 cps         | 2.6 %         |
| 133Cs (KED) | 0.116 ppb             | 2,544 cps         | 0.1 %         |
| 138Ba (KED) | 6.229 ppb             | 206,680 cps       | 0.9 %         |
| 139La (KED) | 0.481 ppb             | 32,196 cps        | 1.6 %         |
| 140Ce (KED) | 0.950 ppb             | 86,993 cps        | 0.9 %         |
| 141Pr (KED) | 0.110 ppb             | 10,266 cps        | 2.4 %         |
| 142Nd (KED) | 0.568 ppb             | 22,191 cps        | 1.2 %         |
| 152Sm (KED) | 0.076 ppb             | 2,764 cps         | 2.4 %         |
| 153Eu (KED) | 0.016 ppb             | 1,132 cps         | 2.6 %         |
| 158Gd (KED) | 0.065 ppb             | 3,387 cps         | 4.2 %         |
| 164Dy (KED) | 0.046 ppb             | 2,607 cps         | 1.4 %         |
| 165Ho (KED) | 0.009 ppb             | 1,746 cps         | 4.5 %         |
| 166Er (KED) | 0.021 ppb             | 1,668 cps         | 6.1 %         |
| 169Tm (KED) | 0.003 ppb             | 784 cps           | 11.9 %        |
| 174Yb (KED) | 0.018 ppb             | 1,542 cps         | 3.6 %         |
| 175Lu (KED) | 0.003 ppb             | 356 cps           | 12.7 %        |
| 205Tl (KED) | 0.013 ppb             | 2,191 cps         | 4.3 %         |
| 208Pb (KED) | 1.455 ppb             | 192,236 cps       | 4.2 %         |
| 232Th (KED) | 0.142 ppb             | 33,251 cps        | 1.0 %         |
| 238U (KED)  | 0.036 ppb             | 9,738 cps         | 2.7 %         |

## Sample Summary

Instrument ID: iCAP Q

Analysis index: 10

Analysis name: 17196jian

Analysis started at: 8/31/2021 4:38:58 PM

User name: WINDOWS-UPCI4ER\Administrator

| Category    | Concentration average | Concentration RSD |
|-------------|-----------------------|-------------------|
| 9Be (KED)   | 0.019 ppb             | 86.6 %            |
| 11B (KED)   | 1.502 ppb             | 41.4 %            |
| 24Mg (KED)  | 547.503 ppb           | 1.7 %             |
| 27Al (KED)  | 550.802 ppb           | 1.6 %             |
| 51V (KED)   | 1.022 ppb             | 4.0 %             |
| 52Cr (KED)  | 3.726 ppb             | 1.6 %             |
| 55Mn (KED)  | 19.426 ppb            | 1.1 %             |
| 56Fe (KED)  | 496.193 ppb           | 1.3 %             |
| 58Ni (KED)  | 2.400 ppb             | 0.6 %             |
| 59Co (KED)  | 0.283 ppb             | 1.5 %             |
| 63Cu (KED)  | 5.384 ppb             | 0.9 %             |
| 64Zn (KED)  | 205.122 ppb           | 1.5 %             |
| 69Ga (KED)  | 1.958 ppb             | 0.7 %             |
| 75As (KED)  | 1.063 ppb             | 2.9 %             |
| 80Se (KED)  | 1.450 ppb             | 5.5 %             |
| 85Rb (KED)  | 1.318 ppb             | 3.0 %             |
| 88Sr (KED)  | 6.607 ppb             | 1.2 %             |
| 107Ag (KED) | 0.080 ppb             | 5.9 %             |
| 114Cd (KED) | 0.129 ppb             | 7.7 %             |
| 133Cs (KED) | 0.099 ppb             | 1.7 %             |
| 138Ba (KED) | 6.066 ppb             | 2.2 %             |
| 139La (KED) | 0.406 ppb             | 2.5 %             |
| 140Ce (KED) | 0.799 ppb             | 2.6 %             |
| 141Pr (KED) | 0.088 ppb             | 2.8 %             |
| 142Nd (KED) | 0.475 ppb             | 1.5 %             |
| 152Sm (KED) | 0.066 ppb             | 0.4 %             |
| 153Eu (KED) | 0.014 ppb             | 1.8 %             |
| 158Gd (KED) | 0.056 ppb             | 3.0 %             |
| 164Dy (KED) | 0.038 ppb             | 8.7 %             |
| 165Ho (KED) | 0.007 ppb             | 10.9 %            |
| 166Er (KED) | 0.016 ppb             | 9.9 %             |
| 169Tm (KED) | 0.003 ppb             | 13.1 %            |
| 174Yb (KED) | 0.015 ppb             | 10.2 %            |
| 175Lu (KED) | 0.002 ppb             | 20.7 %            |
| 205Tl (KED) | 0.011 ppb             | 6.4 %             |
| 208Pb (KED) | 1.386 ppb             | 2.6 %             |
| 232Th (KED) | 0.118 ppb             | 3.0 %             |
| 238U (KED)  | 0.028 ppb             | 3.3 %             |

| Category   | Concentration average | Intensity average | Intensity RSD |
|------------|-----------------------|-------------------|---------------|
| 9Be (KED)  | 0.019 ppb             | 2 cps             | 86.6 %        |
| 11B (KED)  | 1.502 ppb             | 272 cps           | 14.3 %        |
| 24Mg (KED) | 547.503 ppb           | 227,599 cps       | 1.7 %         |
| 27Al (KED) | 550.802 ppb           | 54,767 cps        | 1.6 %         |
| 51V (KED)  | 1.022 ppb             | 6,497 cps         | 4.0 %         |
| 52Cr (KED) | 3.726 ppb             | 37,200 cps        | 1.6 %         |
| 55Mn (KED) | 19.426 ppb            | 90,691 cps        | 1.0 %         |
| 56Fe (KED) | 496.193 ppb           | 4,494,377 cps     | 1.3 %         |
| 58Ni (KED) | 2.400 ppb             | 31,440 cps        | 0.5 %         |
| 59Co (KED) | 0.283 ppb             | 5,579 cps         | 1.5 %         |

| Category    | Concentration average | Intensity average | Intensity RSD |
|-------------|-----------------------|-------------------|---------------|
| 63Cu (KED)  | 5.384 ppb             | 85,120 cps        | 0.8 %         |
| 64Zn (KED)  | 205.122 ppb           | 759,738 cps       | 1.4 %         |
| 69Ga (KED)  | 1.958 ppb             | 9,440 cps         | 0.7 %         |
| 75As (KED)  | 1.063 ppb             | 1,167 cps         | 2.8 %         |
| 80Se (KED)  | 1.450 ppb             | 1,099 cps         | 2.3 %         |
| 85Rb (KED)  | 1.318 ppb             | 5,436 cps         | 2.9 %         |
| 88Sr (KED)  | 6.607 ppb             | 37,450 cps        | 1.2 %         |
| 107Ag (KED) | 0.080 ppb             | 3,707 cps         | 5.6 %         |
| 114Cd (KED) | 0.129 ppb             | 2,396 cps         | 6.5 %         |
| 133Cs (KED) | 0.099 ppb             | 2,175 cps         | 1.6 %         |
| 138Ba (KED) | 6.066 ppb             | 201,547 cps       | 2.1 %         |
| 139La (KED) | 0.406 ppb             | 27,219 cps        | 2.5 %         |
| 140Ce (KED) | 0.799 ppb             | 73,249 cps        | 2.6 %         |
| 141Pr (KED) | 0.088 ppb             | 8,197 cps         | 2.8 %         |
| 142Nd (KED) | 0.475 ppb             | 18,562 cps        | 1.5 %         |
| 152Sm (KED) | 0.066 ppb             | 2,411 cps         | 0.4 %         |
| 153Eu (KED) | 0.014 ppb             | 948 cps           | 1.8 %         |
| 158Gd (KED) | 0.056 ppb             | 2,917 cps         | 3.0 %         |
| 164Dy (KED) | 0.038 ppb             | 2,164 cps         | 8.7 %         |
| 165Ho (KED) | 0.007 ppb             | 1,462 cps         | 10.9 %        |
| 166Er (KED) | 0.016 ppb             | 1,369 cps         | 8.1 %         |
| 169Tm (KED) | 0.003 ppb             | 583 cps           | 13.1 %        |
| 174Yb (KED) | 0.015 ppb             | 1,272 cps         | 10.2 %        |
| 175Lu (KED) | 0.002 ppb             | 263 cps           | 20.7 %        |
| 205Tl (KED) | 0.011 ppb             | 1,921 cps         | 6.3 %         |
| 208Pb (KED) | 1.386 ppb             | 183,745 cps       | 2.4 %         |
| 232Th (KED) | 0.118 ppb             | 27,765 cps        | 3.0 %         |
| 238U (KED)  | 0.028 ppb             | 7,663 cps         | 3.3 %         |

## Sample Summary

Instrument ID: iCAP Q

Analysis index: 11

Analysis name: 17640jian

Analysis started at: 8/31/2021 4:42:11 PM

User name: WINDOWS-UPCI4ER\Administrator

| Category    | Concentration average | Concentration RSD |
|-------------|-----------------------|-------------------|
| 9Be (KED)   | 0.028 ppb             | 100.0 %           |
| 11B (KED)   | 0.848 ppb             | 15.7 %            |
| 24Mg (KED)  | 394.399 ppb           | 1.1 %             |
| 27Al (KED)  | 469.424 ppb           | 1.2 %             |
| 51V (KED)   | 0.856 ppb             | 3.5 %             |
| 52Cr (KED)  | 2.166 ppb             | 1.7 %             |
| 55Mn (KED)  | 11.993 ppb            | 1.7 %             |
| 56Fe (KED)  | 418.914 ppb           | 0.6 %             |
| 58Ni (KED)  | 1.954 ppb             | 1.9 %             |
| 59Co (KED)  | 0.207 ppb             | 1.7 %             |
| 63Cu (KED)  | 7.786 ppb             | 3.4 %             |
| 64Zn (KED)  | 174.615 ppb           | 0.3 %             |
| 69Ga (KED)  | 1.399 ppb             | 4.3 %             |
| 75As (KED)  | 0.763 ppb             | 12.4 %            |
| 80Se (KED)  | 1.790 ppb             | 17.0 %            |
| 85Rb (KED)  | 1.851 ppb             | 0.6 %             |
| 88Sr (KED)  | 4.503 ppb             | 0.4 %             |
| 107Ag (KED) | 0.049 ppb             | 7.3 %             |
| 114Cd (KED) | 0.143 ppb             | 1.8 %             |
| 133Cs (KED) | 0.083 ppb             | 7.4 %             |
| 138Ba (KED) | 4.381 ppb             | 2.2 %             |
| 139La (KED) | 0.378 ppb             | 1.3 %             |
| 140Ce (KED) | 0.725 ppb             | 1.9 %             |
| 141Pr (KED) | 0.088 ppb             | 3.9 %             |
| 142Nd (KED) | 0.447 ppb             | 1.2 %             |
| 152Sm (KED) | 0.058 ppb             | 3.8 %             |
| 153Eu (KED) | 0.011 ppb             | 10.1 %            |
| 158Gd (KED) | 0.051 ppb             | 4.9 %             |
| 164Dy (KED) | 0.035 ppb             | 2.3 %             |
| 165Ho (KED) | 0.007 ppb             | 1.3 %             |
| 166Er (KED) | 0.015 ppb             | 4.2 %             |
| 169Tm (KED) | 0.002 ppb             | 11.5 %            |
| 174Yb (KED) | 0.014 ppb             | 5.8 %             |
| 175Lu (KED) | 0.002 ppb             | 9.9 %             |
| 205Tl (KED) | 0.008 ppb             | 9.0 %             |
| 208Pb (KED) | 0.683 ppb             | 3.4 %             |
| 232Th (KED) | 0.102 ppb             | 3.1 %             |
| 238U (KED)  | 0.025 ppb             | 2.5 %             |

| Category   | Concentration average | Intensity average | Intensity RSD |
|------------|-----------------------|-------------------|---------------|
| 9Be (KED)  | 0.028 ppb             | 3 cps             | 100.0 %       |
| 11B (KED)  | 0.848 ppb             | 231 cps           | 3.6 %         |
| 24Mg (KED) | 394.399 ppb           | 164,156 cps       | 1.1 %         |
| 27Al (KED) | 469.424 ppb           | 46,687 cps        | 1.2 %         |
| 51V (KED)  | 0.856 ppb             | 5,442 cps         | 3.5 %         |
| 52Cr (KED) | 2.166 ppb             | 21,716 cps        | 1.7 %         |
| 55Mn (KED) | 11.993 ppb            | 56,066 cps        | 1.7 %         |
| 56Fe (KED) | 418.914 ppb           | 3,795,366 cps     | 0.6 %         |
| 58Ni (KED) | 1.954 ppb             | 26,025 cps        | 1.8 %         |
| 59Co (KED) | 0.207 ppb             | 4,086 cps         | 1.7 %         |

| Category    | Concentration average | Intensity average | Intensity RSD |
|-------------|-----------------------|-------------------|---------------|
| 63Cu (KED)  | 7.786 ppb             | 121,674 cps       | 3.3 %         |
| 64Zn (KED)  | 174.615 ppb           | 647,797 cps       | 0.3 %         |
| 69Ga (KED)  | 1.399 ppb             | 6,909 cps         | 4.0 %         |
| 75As (KED)  | 0.763 ppb             | 844 cps           | 12.1 %        |
| 80Se (KED)  | 1.790 ppb             | 1,206 cps         | 7.9 %         |
| 85Rb (KED)  | 1.851 ppb             | 7,609 cps         | 0.6 %         |
| 88Sr (KED)  | 4.503 ppb             | 25,590 cps        | 0.4 %         |
| 107Ag (KED) | 0.049 ppb             | 2,346 cps         | 6.8 %         |
| 114Cd (KED) | 0.143 ppb             | 2,616 cps         | 1.6 %         |
| 133Cs (KED) | 0.083 ppb             | 1,841 cps         | 7.4 %         |
| 138Ba (KED) | 4.381 ppb             | 148,460 cps       | 2.1 %         |
| 139La (KED) | 0.378 ppb             | 25,293 cps        | 1.3 %         |
| 140Ce (KED) | 0.725 ppb             | 66,467 cps        | 1.9 %         |
| 141Pr (KED) | 0.088 ppb             | 8,221 cps         | 3.9 %         |
| 142Nd (KED) | 0.447 ppb             | 17,470 cps        | 1.2 %         |
| 152Sm (KED) | 0.058 ppb             | 2,102 cps         | 3.8 %         |
| 153Eu (KED) | 0.011 ppb             | 803 cps           | 10.1 %        |
| 158Gd (KED) | 0.051 ppb             | 2,681 cps         | 4.9 %         |
| 164Dy (KED) | 0.035 ppb             | 2,001 cps         | 2.3 %         |
| 165Ho (KED) | 0.007 ppb             | 1,397 cps         | 1.3 %         |
| 166Er (KED) | 0.015 ppb             | 1,243 cps         | 3.3 %         |
| 169Tm (KED) | 0.002 ppb             | 528 cps           | 11.5 %        |
| 174Yb (KED) | 0.014 ppb             | 1,190 cps         | 5.8 %         |
| 175Lu (KED) | 0.002 ppb             | 271 cps           | 9.9 %         |
| 205Tl (KED) | 0.008 ppb             | 1,457 cps         | 9.0 %         |
| 208Pb (KED) | 0.683 ppb             | 97,599 cps        | 3.0 %         |
| 232Th (KED) | 0.102 ppb             | 23,877 cps        | 3.1 %         |
| 238U (KED)  | 0.025 ppb             | 6,761 cps         | 2.5 %         |

## Sample Summary

Instrument ID: iCAP Q

Analysis index: 12

Analysis name: 296jian

Analysis started at: 8/31/2021 4:45:24 PM

User name: WINDOWS-UPCI4ER\Administrator

| Category    | Concentration average | Concentration RSD |
|-------------|-----------------------|-------------------|
| 9Be (KED)   | 0.047 ppb             | 124.9 %           |
| 11B (KED)   | 8.375 ppb             | 5.1 %             |
| 24Mg (KED)  | 1,648.139 ppb         | 1.2 %             |
| 27Al (KED)  | 2,383.751 ppb         | 0.3 %             |
| 51V (KED)   | 4.709 ppb             | 0.8 %             |
| 52Cr (KED)  | 8.009 ppb             | 0.4 %             |
| 55Mn (KED)  | 58.294 ppb            | 1.2 %             |
| 56Fe (KED)  | 2,577.706 ppb         | 0.3 %             |
| 58Ni (KED)  | 13.398 ppb            | 0.3 %             |
| 59Co (KED)  | 1.201 ppb             | 0.5 %             |
| 63Cu (KED)  | 16.206 ppb            | 0.6 %             |
| 64Zn (KED)  | 203.140 ppb           | 0.4 %             |
| 69Ga (KED)  | 5.419 ppb             | 4.0 %             |
| 75As (KED)  | 1.292 ppb             | 2.9 %             |
| 80Se (KED)  | 1.709 ppb             | 2.2 %             |
| 85Rb (KED)  | 6.672 ppb             | 0.7 %             |
| 88Sr (KED)  | 18.218 ppb            | 0.7 %             |
| 107Ag (KED) | 0.215 ppb             | 3.2 %             |
| 114Cd (KED) | 0.108 ppb             | 4.4 %             |
| 133Cs (KED) | 0.524 ppb             | 5.1 %             |
| 138Ba (KED) | 15.491 ppb            | 0.5 %             |
| 139La (KED) | 1.792 ppb             | 2.0 %             |
| 140Ce (KED) | 3.759 ppb             | 2.3 %             |
| 141Pr (KED) | 0.452 ppb             | 0.5 %             |
| 142Nd (KED) | 2.383 ppb             | 1.9 %             |
| 152Sm (KED) | 0.320 ppb             | 3.6 %             |
| 153Eu (KED) | 0.063 ppb             | 4.8 %             |
| 158Gd (KED) | 0.291 ppb             | 0.8 %             |
| 164Dy (KED) | 0.210 ppb             | 0.7 %             |
| 165Ho (KED) | 0.040 ppb             | 3.0 %             |
| 166Er (KED) | 0.107 ppb             | 1.9 %             |
| 169Tm (KED) | 0.015 ppb             | 3.1 %             |
| 174Yb (KED) | 0.089 ppb             | 6.5 %             |
| 175Lu (KED) | 0.013 ppb             | 10.2 %            |
| 205Tl (KED) | 0.024 ppb             | 4.3 %             |
| 208Pb (KED) | 1.653 ppb             | 1.4 %             |
| 232Th (KED) | 0.491 ppb             | 2.7 %             |
| 238U (KED)  | 0.121 ppb             | 3.3 %             |

| Category   | Concentration average | Intensity average | Intensity RSD |
|------------|-----------------------|-------------------|---------------|
| 9Be (KED)  | 0.047 ppb             | 6 cps             | 124.9 %       |
| 11B (KED)  | 8.375 ppb             | 704 cps           | 3.8 %         |
| 24Mg (KED) | 1,648.139 ppb         | 683,684 cps       | 1.2 %         |
| 27Al (KED) | 2,383.751 ppb         | 236,749 cps       | 0.3 %         |
| 51V (KED)  | 4.709 ppb             | 29,935 cps        | 0.8 %         |
| 52Cr (KED) | 8.009 ppb             | 79,710 cps        | 0.4 %         |
| 55Mn (KED) | 58.294 ppb            | 271,762 cps       | 1.2 %         |
| 56Fe (KED) | 2,577.706 ppb         | 23,322,167 cps    | 0.3 %         |
| 58Ni (KED) | 13.398 ppb            | 164,692 cps       | 0.3 %         |
| 59Co (KED) | 1.201 ppb             | 23,674 cps        | 0.5 %         |

| Category    | Concentration average | Intensity average | Intensity RSD |
|-------------|-----------------------|-------------------|---------------|
| 63Cu (KED)  | 16.206 ppb            | 249,809 cps       | 0.6 %         |
| 64Zn (KED)  | 203.140 ppb           | 752,466 cps       | 0.4 %         |
| 69Ga (KED)  | 5.419 ppb             | 25,102 cps        | 3.9 %         |
| 75As (KED)  | 1.292 ppb             | 1,413 cps         | 2.9 %         |
| 80Se (KED)  | 1.709 ppb             | 1,180 cps         | 1.0 %         |
| 85Rb (KED)  | 6.672 ppb             | 27,278 cps        | 0.7 %         |
| 88Sr (KED)  | 18.218 ppb            | 102,898 cps       | 0.6 %         |
| 107Ag (KED) | 0.215 ppb             | 9,672 cps         | 3.1 %         |
| 114Cd (KED) | 0.108 ppb             | 2,070 cps         | 3.6 %         |
| 133Cs (KED) | 0.524 ppb             | 11,483 cps        | 5.1 %         |
| 138Ba (KED) | 15.491 ppb            | 498,542 cps       | 0.5 %         |
| 139La (KED) | 1.792 ppb             | 119,878 cps       | 2.0 %         |
| 140Ce (KED) | 3.759 ppb             | 343,997 cps       | 2.3 %         |
| 141Pr (KED) | 0.452 ppb             | 42,034 cps        | 0.5 %         |
| 142Nd (KED) | 2.383 ppb             | 92,987 cps        | 1.9 %         |
| 152Sm (KED) | 0.320 ppb             | 11,654 cps        | 3.6 %         |
| 153Eu (KED) | 0.063 ppb             | 4,437 cps         | 4.8 %         |
| 158Gd (KED) | 0.291 ppb             | 15,257 cps        | 0.8 %         |
| 164Dy (KED) | 0.210 ppb             | 11,866 cps        | 0.7 %         |
| 165Ho (KED) | 0.040 ppb             | 7,921 cps         | 3.0 %         |
| 166Er (KED) | 0.107 ppb             | 7,578 cps         | 1.9 %         |
| 169Tm (KED) | 0.015 ppb             | 3,317 cps         | 3.1 %         |
| 174Yb (KED) | 0.089 ppb             | 7,500 cps         | 6.5 %         |
| 175Lu (KED) | 0.013 ppb             | 1,617 cps         | 10.2 %        |
| 205Tl (KED) | 0.024 ppb             | 4,221 cps         | 4.3 %         |
| 208Pb (KED) | 1.653 ppb             | 216,476 cps       | 1.3 %         |
| 232Th (KED) | 0.491 ppb             | 114,662 cps       | 2.6 %         |
| 238U (KED)  | 0.121 ppb             | 32,880 cps        | 3.3 %         |

## Sample Summary

Instrument ID: iCAP Q

Analysis index: 13

Analysis name: 292jian

Analysis started at: 8/31/2021 4:48:36 PM

User name: WINDOWS-UPCI4ER\Administrator

| Category    | Concentration average | Concentration RSD |
|-------------|-----------------------|-------------------|
| 9Be (KED)   | 0.075 ppb             | 78.1 %            |
| 11B (KED)   | 4.806 ppb             | 16.7 %            |
| 24Mg (KED)  | 1,416.215 ppb         | 1.8 %             |
| 27Al (KED)  | 2,108.695 ppb         | 0.6 %             |
| 51V (KED)   | 4.262 ppb             | 0.9 %             |
| 52Cr (KED)  | 8.654 ppb             | 2.0 %             |
| 55Mn (KED)  | 48.652 ppb            | 1.9 %             |
| 56Fe (KED)  | 2,304.677 ppb         | 1.0 %             |
| 58Ni (KED)  | 11.307 ppb            | 0.8 %             |
| 59Co (KED)  | 1.024 ppb             | 2.3 %             |
| 63Cu (KED)  | 13.871 ppb            | 0.5 %             |
| 64Zn (KED)  | 198.164 ppb           | 0.6 %             |
| 69Ga (KED)  | 5.321 ppb             | 2.7 %             |
| 75As (KED)  | 1.096 ppb             | 2.6 %             |
| 80Se (KED)  | 1.375 ppb             | 11.6 %            |
| 85Rb (KED)  | 5.484 ppb             | 1.1 %             |
| 88Sr (KED)  | 13.903 ppb            | 3.8 %             |
| 107Ag (KED) | 0.128 ppb             | 3.2 %             |
| 114Cd (KED) | 0.067 ppb             | 8.0 %             |
| 133Cs (KED) | 0.441 ppb             | 2.0 %             |
| 138Ba (KED) | 14.877 ppb            | 2.1 %             |
| 139La (KED) | 1.558 ppb             | 1.2 %             |
| 140Ce (KED) | 3.106 ppb             | 0.9 %             |
| 141Pr (KED) | 0.373 ppb             | 4.8 %             |
| 142Nd (KED) | 1.927 ppb             | 2.0 %             |
| 152Sm (KED) | 0.272 ppb             | 3.7 %             |
| 153Eu (KED) | 0.054 ppb             | 4.2 %             |
| 158Gd (KED) | 0.244 ppb             | 0.5 %             |
| 164Dy (KED) | 0.177 ppb             | 3.2 %             |
| 165Ho (KED) | 0.033 ppb             | 3.1 %             |
| 166Er (KED) | 0.087 ppb             | 3.7 %             |
| 169Tm (KED) | 0.012 ppb             | 2.1 %             |
| 174Yb (KED) | 0.073 ppb             | 2.3 %             |
| 175Lu (KED) | 0.010 ppb             | 5.5 %             |
| 205Tl (KED) | 0.020 ppb             | 3.1 %             |
| 208Pb (KED) | 1.325 ppb             | 3.4 %             |
| 232Th (KED) | 0.391 ppb             | 1.2 %             |
| 238U (KED)  | 0.100 ppb             | 5.2 %             |

| Category   | Concentration average | Intensity average | Intensity RSD |
|------------|-----------------------|-------------------|---------------|
| 9Be (KED)  | 0.075 ppb             | 9 cps             | 78.1 %        |
| 11B (KED)  | 4.806 ppb             | 480 cps           | 10.5 %        |
| 24Mg (KED) | 1,416.215 ppb         | 587,579 cps       | 1.8 %         |
| 27Al (KED) | 2,108.695 ppb         | 209,440 cps       | 0.6 %         |
| 51V (KED)  | 4.262 ppb             | 27,094 cps        | 0.9 %         |
| 52Cr (KED) | 8.654 ppb             | 86,105 cps        | 2.0 %         |
| 55Mn (KED) | 48.652 ppb            | 226,845 cps       | 1.9 %         |
| 56Fe (KED) | 2,304.677 ppb         | 20,852,550 cps    | 1.0 %         |
| 58Ni (KED) | 11.307 ppb            | 139,356 cps       | 0.8 %         |
| 59Co (KED) | 1.024 ppb             | 20,181 cps        | 2.3 %         |

| Category    | Concentration average | Intensity average | Intensity RSD |
|-------------|-----------------------|-------------------|---------------|
| 63Cu (KED)  | 13.871 ppb            | 214,286 cps       | 0.5 %         |
| 64Zn (KED)  | 198.164 ppb           | 734,209 cps       | 0.6 %         |
| 69Ga (KED)  | 5.321 ppb             | 24,657 cps        | 2.7 %         |
| 75As (KED)  | 1.096 ppb             | 1,202 cps         | 2.6 %         |
| 80Se (KED)  | 1.375 ppb             | 1,076 cps         | 4.7 %         |
| 85Rb (KED)  | 5.484 ppb             | 22,432 cps        | 1.1 %         |
| 88Sr (KED)  | 13.903 ppb            | 78,573 cps        | 3.8 %         |
| 107Ag (KED) | 0.128 ppb             | 5,852 cps         | 3.1 %         |
| 114Cd (KED) | 0.067 ppb             | 1,413 cps         | 6.0 %         |
| 133Cs (KED) | 0.441 ppb             | 9,667 cps         | 2.0 %         |
| 138Ba (KED) | 14.877 ppb            | 479,185 cps       | 2.0 %         |
| 139La (KED) | 1.558 ppb             | 104,278 cps       | 1.2 %         |
| 140Ce (KED) | 3.106 ppb             | 284,294 cps       | 0.9 %         |
| 141Pr (KED) | 0.373 ppb             | 34,708 cps        | 4.7 %         |
| 142Nd (KED) | 1.927 ppb             | 75,200 cps        | 2.0 %         |
| 152Sm (KED) | 0.272 ppb             | 9,937 cps         | 3.7 %         |
| 153Eu (KED) | 0.054 ppb             | 3,758 cps         | 4.2 %         |
| 158Gd (KED) | 0.244 ppb             | 12,807 cps        | 0.5 %         |
| 164Dy (KED) | 0.177 ppb             | 9,996 cps         | 3.2 %         |
| 165Ho (KED) | 0.033 ppb             | 6,593 cps         | 3.1 %         |
| 166Er (KED) | 0.087 ppb             | 6,264 cps         | 3.6 %         |
| 169Tm (KED) | 0.012 ppb             | 2,663 cps         | 2.1 %         |
| 174Yb (KED) | 0.073 ppb             | 6,107 cps         | 2.3 %         |
| 175Lu (KED) | 0.010 ppb             | 1,286 cps         | 5.5 %         |
| 205Tl (KED) | 0.020 ppb             | 3,462 cps         | 3.1 %         |
| 208Pb (KED) | 1.325 ppb             | 176,212 cps       | 3.1 %         |
| 232Th (KED) | 0.391 ppb             | 91,201 cps        | 1.2 %         |
| 238U (KED)  | 0.100 ppb             | 27,159 cps        | 5.2 %         |

## Sample Summary

Instrument ID: iCAP Q

Analysis index: 14

Analysis name: 286jian

Analysis started at: 8/31/2021 4:52:01 PM

User name: WINDOWS-UPCI4ER\Administrator

| Category    | Concentration average | Concentration RSD |
|-------------|-----------------------|-------------------|
| 9Be (KED)   | 0.047 ppb             | 34.6 %            |
| 11B (KED)   | 3.481 ppb             | 9.5 %             |
| 24Mg (KED)  | 1,100.504 ppb         | 0.8 %             |
| 27Al (KED)  | 1,532.225 ppb         | 1.4 %             |
| 51V (KED)   | 3.014 ppb             | 2.8 %             |
| 52Cr (KED)  | 6.009 ppb             | 0.4 %             |
| 55Mn (KED)  | 37.390 ppb            | 1.6 %             |
| 56Fe (KED)  | 1,670.222 ppb         | 1.6 %             |
| 58Ni (KED)  | 7.368 ppb             | 0.2 %             |
| 59Co (KED)  | 0.786 ppb             | 1.0 %             |
| 63Cu (KED)  | 7.465 ppb             | 0.1 %             |
| 64Zn (KED)  | 207.270 ppb           | 0.9 %             |
| 69Ga (KED)  | 3.676 ppb             | 1.2 %             |
| 75As (KED)  | 1.001 ppb             | 7.3 %             |
| 80Se (KED)  | 1.687 ppb             | 5.6 %             |
| 85Rb (KED)  | 4.266 ppb             | 0.9 %             |
| 88Sr (KED)  | 11.598 ppb            | 1.2 %             |
| 107Ag (KED) | 0.109 ppb             | 1.6 %             |
| 114Cd (KED) | 0.109 ppb             | 6.5 %             |
| 133Cs (KED) | 0.339 ppb             | 2.8 %             |
| 138Ba (KED) | 9.984 ppb             | 1.1 %             |
| 139La (KED) | 1.138 ppb             | 2.5 %             |
| 140Ce (KED) | 2.320 ppb             | 1.4 %             |
| 141Pr (KED) | 0.281 ppb             | 3.6 %             |
| 142Nd (KED) | 1.440 ppb             | 1.1 %             |
| 152Sm (KED) | 0.200 ppb             | 3.0 %             |
| 153Eu (KED) | 0.040 ppb             | 3.4 %             |
| 158Gd (KED) | 0.180 ppb             | 3.6 %             |
| 164Dy (KED) | 0.129 ppb             | 0.7 %             |
| 165Ho (KED) | 0.024 ppb             | 1.9 %             |
| 166Er (KED) | 0.066 ppb             | 1.9 %             |
| 169Tm (KED) | 0.008 ppb             | 5.2 %             |
| 174Yb (KED) | 0.049 ppb             | 1.5 %             |
| 175Lu (KED) | 0.007 ppb             | 3.2 %             |
| 205Tl (KED) | 0.015 ppb             | 4.0 %             |
| 208Pb (KED) | 1.077 ppb             | 1.5 %             |
| 232Th (KED) | 0.303 ppb             | 2.8 %             |
| 238U (KED)  | 0.075 ppb             | 3.4 %             |

| Category   | Concentration average | Intensity average | Intensity RSD |
|------------|-----------------------|-------------------|---------------|
| 9Be (KED)  | 0.047 ppb             | 6 cps             | 34.6 %        |
| 11B (KED)  | 3.481 ppb             | 397 cps           | 5.2 %         |
| 24Mg (KED) | 1,100.504 ppb         | 456,754 cps       | 0.8 %         |
| 27Al (KED) | 1,532.225 ppb         | 152,206 cps       | 1.4 %         |
| 51V (KED)  | 3.014 ppb             | 19,157 cps        | 2.8 %         |
| 52Cr (KED) | 6.009 ppb             | 59,857 cps        | 0.4 %         |
| 55Mn (KED) | 37.390 ppb            | 174,378 cps       | 1.6 %         |
| 56Fe (KED) | 1,670.222 ppb         | 15,113,753 cps    | 1.6 %         |
| 58Ni (KED) | 7.368 ppb             | 91,627 cps        | 0.2 %         |
| 59Co (KED) | 0.786 ppb             | 15,493 cps        | 1.0 %         |

| Category    | Concentration average | Intensity average | Intensity RSD |
|-------------|-----------------------|-------------------|---------------|
| 63Cu (KED)  | 7.465 ppb             | 116,788 cps       | 0.1 %         |
| 64Zn (KED)  | 207.270 ppb           | 767,620 cps       | 0.9 %         |
| 69Ga (KED)  | 3.676 ppb             | 17,215 cps        | 1.1 %         |
| 75As (KED)  | 1.001 ppb             | 1,100 cps         | 7.2 %         |
| 80Se (KED)  | 1.687 ppb             | 1,173 cps         | 2.5 %         |
| 85Rb (KED)  | 4.266 ppb             | 17,464 cps        | 0.9 %         |
| 88Sr (KED)  | 11.598 ppb            | 65,584 cps        | 1.2 %         |
| 107Ag (KED) | 0.109 ppb             | 4,981 cps         | 1.6 %         |
| 114Cd (KED) | 0.109 ppb             | 2,080 cps         | 5.4 %         |
| 133Cs (KED) | 0.339 ppb             | 7,429 cps         | 2.8 %         |
| 138Ba (KED) | 9.984 ppb             | 325,028 cps       | 1.1 %         |
| 139La (KED) | 1.138 ppb             | 76,188 cps        | 2.5 %         |
| 140Ce (KED) | 2.320 ppb             | 212,356 cps       | 1.4 %         |
| 141Pr (KED) | 0.281 ppb             | 26,124 cps        | 3.6 %         |
| 142Nd (KED) | 1.440 ppb             | 56,183 cps        | 1.1 %         |
| 152Sm (KED) | 0.200 ppb             | 7,292 cps         | 3.0 %         |
| 153Eu (KED) | 0.040 ppb             | 2,837 cps         | 3.4 %         |
| 158Gd (KED) | 0.180 ppb             | 9,421 cps         | 3.6 %         |
| 164Dy (KED) | 0.129 ppb             | 7,298 cps         | 0.7 %         |
| 165Ho (KED) | 0.024 ppb             | 4,713 cps         | 1.9 %         |
| 166Er (KED) | 0.066 ppb             | 4,815 cps         | 1.8 %         |
| 169Tm (KED) | 0.008 ppb             | 1,913 cps         | 5.2 %         |
| 174Yb (KED) | 0.049 ppb             | 4,157 cps         | 1.5 %         |
| 175Lu (KED) | 0.007 ppb             | 886 cps           | 3.2 %         |
| 205Tl (KED) | 0.015 ppb             | 2,695 cps         | 4.0 %         |
| 208Pb (KED) | 1.077 ppb             | 145,869 cps       | 1.3 %         |
| 232Th (KED) | 0.303 ppb             | 70,779 cps        | 2.8 %         |
| 238U (KED)  | 0.075 ppb             | 20,407 cps        | 3.4 %         |

## Sample Summary

Instrument ID: iCAP Q

Analysis index: 15

Analysis name: 300jian

Analysis started at: 8/31/2021 4:55:10 PM

User name: WINDOWS-UPCI4ER\Administrator

| Category    | Concentration average | Concentration RSD |
|-------------|-----------------------|-------------------|
| 9Be (KED)   | 0.047 ppb             | 69.3 %            |
| 11B (KED)   | 3.180 ppb             | 13.4 %            |
| 24Mg (KED)  | 461.840 ppb           | 1.1 %             |
| 27Al (KED)  | 665.258 ppb           | 1.7 %             |
| 51V (KED)   | 1.243 ppb             | 2.0 %             |
| 52Cr (KED)  | 4.311 ppb             | 1.0 %             |
| 55Mn (KED)  | 14.914 ppb            | 2.5 %             |
| 56Fe (KED)  | 676.759 ppb           | 1.5 %             |
| 58Ni (KED)  | 3.435 ppb             | 0.8 %             |
| 59Co (KED)  | 0.373 ppb             | 3.0 %             |
| 63Cu (KED)  | 8.458 ppb             | 0.8 %             |
| 64Zn (KED)  | 202.313 ppb           | 1.5 %             |
| 69Ga (KED)  | 1.713 ppb             | 0.6 %             |
| 75As (KED)  | 0.570 ppb             | 19.3 %            |
| 80Se (KED)  | 1.900 ppb             | 10.4 %            |
| 85Rb (KED)  | 2.515 ppb             | 2.1 %             |
| 88Sr (KED)  | 5.217 ppb             | 2.2 %             |
| 107Ag (KED) | 0.064 ppb             | 4.3 %             |
| 114Cd (KED) | 0.118 ppb             | 4.4 %             |
| 133Cs (KED) | 0.166 ppb             | 2.2 %             |
| 138Ba (KED) | 5.018 ppb             | 2.2 %             |
| 139La (KED) | 0.605 ppb             | 1.0 %             |
| 140Ce (KED) | 1.204 ppb             | 2.0 %             |
| 141Pr (KED) | 0.141 ppb             | 1.9 %             |
| 142Nd (KED) | 0.708 ppb             | 2.4 %             |
| 152Sm (KED) | 0.090 ppb             | 5.7 %             |
| 153Eu (KED) | 0.018 ppb             | 2.7 %             |
| 158Gd (KED) | 0.075 ppb             | 2.1 %             |
| 164Dy (KED) | 0.052 ppb             | 5.3 %             |
| 165Ho (KED) | 0.011 ppb             | 0.2 %             |
| 166Er (KED) | 0.023 ppb             | 4.5 %             |
| 169Tm (KED) | 0.003 ppb             | 7.6 %             |
| 174Yb (KED) | 0.021 ppb             | 10.2 %            |
| 175Lu (KED) | 0.003 ppb             | 6.5 %             |
| 205Tl (KED) | 0.007 ppb             | 2.1 %             |
| 208Pb (KED) | 0.972 ppb             | 1.3 %             |
| 232Th (KED) | 0.153 ppb             | 3.9 %             |
| 238U (KED)  | 0.036 ppb             | 4.5 %             |

| Category   | Concentration average | Intensity average | Intensity RSD |
|------------|-----------------------|-------------------|---------------|
| 9Be (KED)  | 0.047 ppb             | 6 cps             | 69.3 %        |
| 11B (KED)  | 3.180 ppb             | 378 cps           | 7.1 %         |
| 24Mg (KED) | 461.840 ppb           | 192,102 cps       | 1.1 %         |
| 27Al (KED) | 665.258 ppb           | 66,130 cps        | 1.7 %         |
| 51V (KED)  | 1.243 ppb             | 7,900 cps         | 2.0 %         |
| 52Cr (KED) | 4.311 ppb             | 43,006 cps        | 1.0 %         |
| 55Mn (KED) | 14.914 ppb            | 69,671 cps        | 2.5 %         |
| 56Fe (KED) | 676.759 ppb           | 6,127,637 cps     | 1.5 %         |
| 58Ni (KED) | 3.435 ppb             | 43,973 cps        | 0.8 %         |
| 59Co (KED) | 0.373 ppb             | 7,357 cps         | 3.0 %         |

| Category    | Concentration average | Intensity average | Intensity RSD |
|-------------|-----------------------|-------------------|---------------|
| 63Cu (KED)  | 8.458 ppb             | 131,899 cps       | 0.8 %         |
| 64Zn (KED)  | 202.313 ppb           | 749,430 cps       | 1.4 %         |
| 69Ga (KED)  | 1.713 ppb             | 8,332 cps         | 0.5 %         |
| 75As (KED)  | 0.570 ppb             | 637 cps           | 18.6 %        |
| 80Se (KED)  | 1.900 ppb             | 1,240 cps         | 5.0 %         |
| 85Rb (KED)  | 2.515 ppb             | 10,320 cps        | 2.1 %         |
| 88Sr (KED)  | 5.217 ppb             | 29,616 cps        | 2.2 %         |
| 107Ag (KED) | 0.064 ppb             | 2,994 cps         | 4.1 %         |
| 114Cd (KED) | 0.118 ppb             | 2,232 cps         | 3.7 %         |
| 133Cs (KED) | 0.166 ppb             | 3,647 cps         | 2.2 %         |
| 138Ba (KED) | 5.018 ppb             | 168,520 cps       | 2.1 %         |
| 139La (KED) | 0.605 ppb             | 40,526 cps        | 1.0 %         |
| 140Ce (KED) | 1.204 ppb             | 110,270 cps       | 2.0 %         |
| 141Pr (KED) | 0.141 ppb             | 13,124 cps        | 1.9 %         |
| 142Nd (KED) | 0.708 ppb             | 27,649 cps        | 2.4 %         |
| 152Sm (KED) | 0.090 ppb             | 3,269 cps         | 5.6 %         |
| 153Eu (KED) | 0.018 ppb             | 1,280 cps         | 2.7 %         |
| 158Gd (KED) | 0.075 ppb             | 3,938 cps         | 2.1 %         |
| 164Dy (KED) | 0.052 ppb             | 2,940 cps         | 5.3 %         |
| 165Ho (KED) | 0.011 ppb             | 2,099 cps         | 0.2 %         |
| 166Er (KED) | 0.023 ppb             | 1,809 cps         | 3.9 %         |
| 169Tm (KED) | 0.003 ppb             | 774 cps           | 7.6 %         |
| 174Yb (KED) | 0.021 ppb             | 1,777 cps         | 10.2 %        |
| 175Lu (KED) | 0.003 ppb             | 390 cps           | 6.5 %         |
| 205Tl (KED) | 0.007 ppb             | 1,290 cps         | 2.1 %         |
| 208Pb (KED) | 0.972 ppb             | 133,023 cps       | 1.2 %         |
| 232Th (KED) | 0.153 ppb             | 35,804 cps        | 3.9 %         |
| 238U (KED)  | 0.036 ppb             | 9,834 cps         | 4.5 %         |

## Sample Summary

Instrument ID: iCAP Q

Analysis index: 16

Analysis name: 298jian

Analysis started at: 8/31/2021 4:58:28 PM

User name: WINDOWS-UPCI4ER\Administrator

| Category    | Concentration average | Concentration RSD |
|-------------|-----------------------|-------------------|
| 9Be (KED)   | 0.066 ppb             | 89.2 %            |
| 11B (KED)   | 4.558 ppb             | 8.9 %             |
| 24Mg (KED)  | 1,403.566 ppb         | 2.3 %             |
| 27Al (KED)  | 2,065.812 ppb         | 0.5 %             |
| 51V (KED)   | 4.394 ppb             | 1.1 %             |
| 52Cr (KED)  | 7.068 ppb             | 0.8 %             |
| 55Mn (KED)  | 47.562 ppb            | 2.6 %             |
| 56Fe (KED)  | 2,312.935 ppb         | 2.4 %             |
| 58Ni (KED)  | 10.630 ppb            | 0.9 %             |
| 59Co (KED)  | 1.075 ppb             | 0.2 %             |
| 63Cu (KED)  | 8.821 ppb             | 2.2 %             |
| 64Zn (KED)  | 185.580 ppb           | 0.7 %             |
| 69Ga (KED)  | 4.346 ppb             | 4.7 %             |
| 75As (KED)  | 1.123 ppb             | 6.9 %             |
| 80Se (KED)  | 1.340 ppb             | 34.6 %            |
| 85Rb (KED)  | 6.023 ppb             | 1.4 %             |
| 88Sr (KED)  | 14.005 ppb            | 1.8 %             |
| 107Ag (KED) | 0.060 ppb             | 3.4 %             |
| 114Cd (KED) | 0.090 ppb             | 2.4 %             |
| 133Cs (KED) | 0.444 ppb             | 0.9 %             |
| 138Ba (KED) | 12.594 ppb            | 2.1 %             |
| 139La (KED) | 1.854 ppb             | 2.8 %             |
| 140Ce (KED) | 3.726 ppb             | 4.0 %             |
| 141Pr (KED) | 0.433 ppb             | 1.9 %             |
| 142Nd (KED) | 2.225 ppb             | 3.2 %             |
| 152Sm (KED) | 0.301 ppb             | 1.4 %             |
| 153Eu (KED) | 0.060 ppb             | 3.0 %             |
| 158Gd (KED) | 0.255 ppb             | 4.2 %             |
| 164Dy (KED) | 0.180 ppb             | 3.3 %             |
| 165Ho (KED) | 0.033 ppb             | 3.7 %             |
| 166Er (KED) | 0.092 ppb             | 1.7 %             |
| 169Tm (KED) | 0.012 ppb             | 4.4 %             |
| 174Yb (KED) | 0.078 ppb             | 5.2 %             |
| 175Lu (KED) | 0.012 ppb             | 8.8 %             |
| 205Tl (KED) | 0.020 ppb             | 2.3 %             |
| 208Pb (KED) | 1.627 ppb             | 1.9 %             |
| 232Th (KED) | 0.407 ppb             | 2.6 %             |
| 238U (KED)  | 0.108 ppb             | 4.7 %             |

| Category   | Concentration average | Intensity average | Intensity RSD |
|------------|-----------------------|-------------------|---------------|
| 9Be (KED)  | 0.066 ppb             | 8 cps             | 89.2 %        |
| 11B (KED)  | 4.558 ppb             | 464 cps           | 5.5 %         |
| 24Mg (KED) | 1,403.566 ppb         | 582,338 cps       | 2.3 %         |
| 27Al (KED) | 2,065.812 ppb         | 205,183 cps       | 0.5 %         |
| 51V (KED)  | 4.394 ppb             | 27,931 cps        | 1.1 %         |
| 52Cr (KED) | 7.068 ppb             | 70,370 cps        | 0.8 %         |
| 55Mn (KED) | 47.562 ppb            | 221,768 cps       | 2.6 %         |
| 56Fe (KED) | 2,312.935 ppb         | 20,927,247 cps    | 2.4 %         |
| 58Ni (KED) | 10.630 ppb            | 131,156 cps       | 0.9 %         |
| 59Co (KED) | 1.075 ppb             | 21,198 cps        | 0.2 %         |

| Category    | Concentration average | Intensity average | Intensity RSD |
|-------------|-----------------------|-------------------|---------------|
| 63Cu (KED)  | 8.821 ppb             | 137,431 cps       | 2.1 %         |
| 64Zn (KED)  | 185.580 ppb           | 688,032 cps       | 0.7 %         |
| 69Ga (KED)  | 4.346 ppb             | 20,244 cps        | 4.6 %         |
| 75As (KED)  | 1.123 ppb             | 1,232 cps         | 6.8 %         |
| 80Se (KED)  | 1.340 ppb             | 1,064 cps         | 13.6 %        |
| 85Rb (KED)  | 6.023 ppb             | 24,633 cps        | 1.4 %         |
| 88Sr (KED)  | 14.005 ppb            | 79,150 cps        | 1.8 %         |
| 107Ag (KED) | 0.060 ppb             | 2,836 cps         | 3.2 %         |
| 114Cd (KED) | 0.090 ppb             | 1,786 cps         | 1.9 %         |
| 133Cs (KED) | 0.444 ppb             | 9,725 cps         | 0.9 %         |
| 138Ba (KED) | 12.594 ppb            | 407,257 cps       | 2.0 %         |
| 139La (KED) | 1.854 ppb             | 124,020 cps       | 2.8 %         |
| 140Ce (KED) | 3.726 ppb             | 340,968 cps       | 4.0 %         |
| 141Pr (KED) | 0.433 ppb             | 40,305 cps        | 1.9 %         |
| 142Nd (KED) | 2.225 ppb             | 86,807 cps        | 3.2 %         |
| 152Sm (KED) | 0.301 ppb             | 10,994 cps        | 1.4 %         |
| 153Eu (KED) | 0.060 ppb             | 4,173 cps         | 3.0 %         |
| 158Gd (KED) | 0.255 ppb             | 13,385 cps        | 4.2 %         |
| 164Dy (KED) | 0.180 ppb             | 10,142 cps        | 3.3 %         |
| 165Ho (KED) | 0.033 ppb             | 6,628 cps         | 3.7 %         |
| 166Er (KED) | 0.092 ppb             | 6,597 cps         | 1.7 %         |
| 169Tm (KED) | 0.012 ppb             | 2,831 cps         | 4.4 %         |
| 174Yb (KED) | 0.078 ppb             | 6,537 cps         | 5.2 %         |
| 175Lu (KED) | 0.012 ppb             | 1,437 cps         | 8.8 %         |
| 205Tl (KED) | 0.020 ppb             | 3,492 cps         | 2.3 %         |
| 208Pb (KED) | 1.627 ppb             | 213,293 cps       | 1.7 %         |
| 232Th (KED) | 0.407 ppb             | 94,897 cps        | 2.6 %         |
| 238U (KED)  | 0.108 ppb             | 29,279 cps        | 4.6 %         |

## Sample Summary

Instrument ID: iCAP Q

Analysis index: 17

Analysis name: 17020jian

Analysis started at: 8/31/2021 5:01:36 PM

User name: WINDOWS-UPCI4ER\Administrator

| Category    | Concentration average | Concentration RSD |
|-------------|-----------------------|-------------------|
| 9Be (KED)   | 0.038 ppb             | 86.6 %            |
| 11B (KED)   | 5.142 ppb             | 6.7 %             |
| 24Mg (KED)  | 1,004.901 ppb         | 1.1 %             |
| 27Al (KED)  | 1,393.701 ppb         | 0.7 %             |
| 51V (KED)   | 2.804 ppb             | 2.6 %             |
| 52Cr (KED)  | 6.402 ppb             | 0.8 %             |
| 55Mn (KED)  | 33.862 ppb            | 1.2 %             |
| 56Fe (KED)  | 1,509.940 ppb         | 0.8 %             |
| 58Ni (KED)  | 7.285 ppb             | 1.7 %             |
| 59Co (KED)  | 0.841 ppb             | 2.1 %             |
| 63Cu (KED)  | 10.904 ppb            | 0.5 %             |
| 64Zn (KED)  | 219.046 ppb           | 0.2 %             |
| 69Ga (KED)  | 3.180 ppb             | 1.3 %             |
| 75As (KED)  | 0.933 ppb             | 11.2 %            |
| 80Se (KED)  | 1.893 ppb             | 12.3 %            |
| 85Rb (KED)  | 4.870 ppb             | 2.1 %             |
| 88Sr (KED)  | 12.487 ppb            | 1.9 %             |
| 107Ag (KED) | 0.120 ppb             | 2.1 %             |
| 114Cd (KED) | 0.157 ppb             | 5.6 %             |
| 133Cs (KED) | 0.293 ppb             | 0.1 %             |
| 138Ba (KED) | 8.791 ppb             | 3.1 %             |
| 139La (KED) | 1.131 ppb             | 3.3 %             |
| 140Ce (KED) | 2.304 ppb             | 2.6 %             |
| 141Pr (KED) | 0.264 ppb             | 2.3 %             |
| 142Nd (KED) | 1.382 ppb             | 1.9 %             |
| 152Sm (KED) | 0.178 ppb             | 5.0 %             |
| 153Eu (KED) | 0.033 ppb             | 5.4 %             |
| 158Gd (KED) | 0.159 ppb             | 6.3 %             |
| 164Dy (KED) | 0.115 ppb             | 6.0 %             |
| 165Ho (KED) | 0.022 ppb             | 4.3 %             |
| 166Er (KED) | 0.054 ppb             | 4.3 %             |
| 169Tm (KED) | 0.008 ppb             | 3.1 %             |
| 174Yb (KED) | 0.047 ppb             | 8.0 %             |
| 175Lu (KED) | 0.007 ppb             | 9.6 %             |
| 205Tl (KED) | 0.016 ppb             | 5.2 %             |
| 208Pb (KED) | 1.426 ppb             | 1.4 %             |
| 232Th (KED) | 0.311 ppb             | 1.4 %             |
| 238U (KED)  | 0.070 ppb             | 0.9 %             |

| Category   | Concentration average | Intensity average | Intensity RSD |
|------------|-----------------------|-------------------|---------------|
| 9Be (KED)  | 0.038 ppb             | 4 cps             | 86.6 %        |
| 11B (KED)  | 5.142 ppb             | 501 cps           | 4.3 %         |
| 24Mg (KED) | 1,004.901 ppb         | 417,137 cps       | 1.1 %         |
| 27Al (KED) | 1,393.701 ppb         | 138,453 cps       | 0.7 %         |
| 51V (KED)  | 2.804 ppb             | 17,825 cps        | 2.6 %         |
| 52Cr (KED) | 6.402 ppb             | 63,758 cps        | 0.8 %         |
| 55Mn (KED) | 33.862 ppb            | 157,944 cps       | 1.2 %         |
| 56Fe (KED) | 1,509.940 ppb         | 13,663,961 cps    | 0.8 %         |
| 58Ni (KED) | 7.285 ppb             | 90,630 cps        | 1.6 %         |
| 59Co (KED) | 0.841 ppb             | 16,591 cps        | 2.1 %         |

| Category    | Concentration average | Intensity average | Intensity RSD |
|-------------|-----------------------|-------------------|---------------|
| 63Cu (KED)  | 10.904 ppb            | 169,126 cps       | 0.5 %         |
| 64Zn (KED)  | 219.046 ppb           | 810,832 cps       | 0.2 %         |
| 69Ga (KED)  | 3.180 ppb             | 14,969 cps        | 1.3 %         |
| 75As (KED)  | 0.933 ppb             | 1,027 cps         | 10.9 %        |
| 80Se (KED)  | 1.893 ppb             | 1,238 cps         | 5.9 %         |
| 85Rb (KED)  | 4.870 ppb             | 19,928 cps        | 2.1 %         |
| 88Sr (KED)  | 12.487 ppb            | 70,592 cps        | 1.9 %         |
| 107Ag (KED) | 0.120 ppb             | 5,471 cps         | 2.1 %         |
| 114Cd (KED) | 0.157 ppb             | 2,848 cps         | 4.9 %         |
| 133Cs (KED) | 0.293 ppb             | 6,422 cps         | 0.1 %         |
| 138Ba (KED) | 8.791 ppb             | 287,425 cps       | 3.0 %         |
| 139La (KED) | 1.131 ppb             | 75,663 cps        | 3.3 %         |
| 140Ce (KED) | 2.304 ppb             | 210,940 cps       | 2.6 %         |
| 141Pr (KED) | 0.264 ppb             | 24,627 cps        | 2.3 %         |
| 142Nd (KED) | 1.382 ppb             | 53,957 cps        | 1.9 %         |
| 152Sm (KED) | 0.178 ppb             | 6,497 cps         | 5.0 %         |
| 153Eu (KED) | 0.033 ppb             | 2,316 cps         | 5.4 %         |
| 158Gd (KED) | 0.159 ppb             | 8,362 cps         | 6.3 %         |
| 164Dy (KED) | 0.115 ppb             | 6,503 cps         | 6.0 %         |
| 165Ho (KED) | 0.022 ppb             | 4,344 cps         | 4.3 %         |
| 166Er (KED) | 0.054 ppb             | 3,985 cps         | 4.1 %         |
| 169Tm (KED) | 0.008 ppb             | 1,722 cps         | 3.1 %         |
| 174Yb (KED) | 0.047 ppb             | 3,966 cps         | 8.0 %         |
| 175Lu (KED) | 0.007 ppb             | 843 cps           | 9.6 %         |
| 205Tl (KED) | 0.016 ppb             | 2,751 cps         | 5.2 %         |
| 208Pb (KED) | 1.426 ppb             | 188,655 cps       | 1.3 %         |
| 232Th (KED) | 0.311 ppb             | 72,657 cps        | 1.4 %         |
| 238U (KED)  | 0.070 ppb             | 19,166 cps        | 0.9 %         |

## Sample Summary

Instrument ID: iCAP Q

Analysis index: 18

Analysis name: 288jian

Analysis started at: 8/31/2021 5:04:40 PM

User name: WINDOWS-UPCI4ER\Administrator

| Category    | Concentration average | Concentration RSD |
|-------------|-----------------------|-------------------|
| 9Be (KED)   | 0.094 ppb             | 34.6 %            |
| 11B (KED)   | 7.739 ppb             | 8.9 %             |
| 24Mg (KED)  | 1,322.877 ppb         | 1.1 %             |
| 27Al (KED)  | 1,891.084 ppb         | 1.0 %             |
| 51V (KED)   | 4.480 ppb             | 1.2 %             |
| 52Cr (KED)  | 8.056 ppb             | 0.7 %             |
| 55Mn (KED)  | 44.679 ppb            | 0.4 %             |
| 56Fe (KED)  | 2,301.961 ppb         | 0.7 %             |
| 58Ni (KED)  | 9.758 ppb             | 0.3 %             |
| 59Co (KED)  | 1.033 ppb             | 0.5 %             |
| 63Cu (KED)  | 14.388 ppb            | 0.1 %             |
| 64Zn (KED)  | 202.056 ppb           | 1.0 %             |
| 69Ga (KED)  | 3.887 ppb             | 2.6 %             |
| 75As (KED)  | 1.031 ppb             | 1.8 %             |
| 80Se (KED)  | 2.042 ppb             | 20.6 %            |
| 85Rb (KED)  | 4.937 ppb             | 0.5 %             |
| 88Sr (KED)  | 11.988 ppb            | 0.2 %             |
| 107Ag (KED) | 0.042 ppb             | 2.0 %             |
| 114Cd (KED) | 0.126 ppb             | 4.1 %             |
| 133Cs (KED) | 0.486 ppb             | 1.5 %             |
| 138Ba (KED) | 11.061 ppb            | 1.5 %             |
| 139La (KED) | 1.536 ppb             | 1.6 %             |
| 140Ce (KED) | 3.038 ppb             | 1.3 %             |
| 141Pr (KED) | 0.386 ppb             | 1.1 %             |
| 142Nd (KED) | 1.945 ppb             | 0.7 %             |
| 152Sm (KED) | 0.274 ppb             | 2.6 %             |
| 153Eu (KED) | 0.051 ppb             | 3.6 %             |
| 158Gd (KED) | 0.248 ppb             | 4.7 %             |
| 164Dy (KED) | 0.188 ppb             | 4.6 %             |
| 165Ho (KED) | 0.035 ppb             | 2.0 %             |
| 166Er (KED) | 0.094 ppb             | 0.9 %             |
| 169Tm (KED) | 0.014 ppb             | 5.4 %             |
| 174Yb (KED) | 0.081 ppb             | 4.9 %             |
| 175Lu (KED) | 0.012 ppb             | 6.7 %             |
| 205Tl (KED) | 0.017 ppb             | 3.6 %             |
| 208Pb (KED) | 1.121 ppb             | 2.8 %             |
| 232Th (KED) | 0.364 ppb             | 1.9 %             |
| 238U (KED)  | 0.090 ppb             | 3.7 %             |

| Category   | Concentration average | Intensity average | Intensity RSD |
|------------|-----------------------|-------------------|---------------|
| 9Be (KED)  | 0.094 ppb             | 11 cps            | 34.6 %        |
| 11B (KED)  | 7.739 ppb             | 664 cps           | 6.5 %         |
| 24Mg (KED) | 1,322.877 ppb         | 548,901 cps       | 1.1 %         |
| 27Al (KED) | 1,891.084 ppb         | 187,835 cps       | 1.0 %         |
| 51V (KED)  | 4.480 ppb             | 28,477 cps        | 1.2 %         |
| 52Cr (KED) | 8.056 ppb             | 80,169 cps        | 0.7 %         |
| 55Mn (KED) | 44.679 ppb            | 208,336 cps       | 0.4 %         |
| 56Fe (KED) | 2,301.961 ppb         | 20,827,986 cps    | 0.7 %         |
| 58Ni (KED) | 9.758 ppb             | 120,595 cps       | 0.3 %         |
| 59Co (KED) | 1.033 ppb             | 20,358 cps        | 0.5 %         |

| Category    | Concentration average | Intensity average | Intensity RSD |
|-------------|-----------------------|-------------------|---------------|
| 63Cu (KED)  | 14.388 ppb            | 222,145 cps       | 0.1 %         |
| 64Zn (KED)  | 202.056 ppb           | 748,488 cps       | 0.9 %         |
| 69Ga (KED)  | 3.887 ppb             | 18,171 cps        | 2.5 %         |
| 75As (KED)  | 1.031 ppb             | 1,132 cps         | 1.8 %         |
| 80Se (KED)  | 2.042 ppb             | 1,285 cps         | 10.3 %        |
| 85Rb (KED)  | 4.937 ppb             | 20,200 cps        | 0.5 %         |
| 88Sr (KED)  | 11.988 ppb            | 67,783 cps        | 0.2 %         |
| 107Ag (KED) | 0.042 ppb             | 2,052 cps         | 1.8 %         |
| 114Cd (KED) | 0.126 ppb             | 2,347 cps         | 3.5 %         |
| 133Cs (KED) | 0.486 ppb             | 10,652 cps        | 1.5 %         |
| 138Ba (KED) | 11.061 ppb            | 358,949 cps       | 1.4 %         |
| 139La (KED) | 1.536 ppb             | 102,744 cps       | 1.6 %         |
| 140Ce (KED) | 3.038 ppb             | 278,028 cps       | 1.3 %         |
| 141Pr (KED) | 0.386 ppb             | 35,896 cps        | 1.1 %         |
| 142Nd (KED) | 1.945 ppb             | 75,896 cps        | 0.7 %         |
| 152Sm (KED) | 0.274 ppb             | 9,995 cps         | 2.6 %         |
| 153Eu (KED) | 0.051 ppb             | 3,561 cps         | 3.6 %         |
| 158Gd (KED) | 0.248 ppb             | 13,029 cps        | 4.7 %         |
| 164Dy (KED) | 0.188 ppb             | 10,600 cps        | 4.6 %         |
| 165Ho (KED) | 0.035 ppb             | 6,921 cps         | 2.0 %         |
| 166Er (KED) | 0.094 ppb             | 6,744 cps         | 0.9 %         |
| 169Tm (KED) | 0.014 ppb             | 3,107 cps         | 5.4 %         |
| 174Yb (KED) | 0.081 ppb             | 6,844 cps         | 4.9 %         |
| 175Lu (KED) | 0.012 ppb             | 1,538 cps         | 6.7 %         |
| 205Tl (KED) | 0.017 ppb             | 3,027 cps         | 3.6 %         |
| 208Pb (KED) | 1.121 ppb             | 151,280 cps       | 2.6 %         |
| 232Th (KED) | 0.364 ppb             | 84,972 cps        | 1.9 %         |
| 238U (KED)  | 0.090 ppb             | 24,352 cps        | 3.7 %         |

## Sample Summary

Instrument ID: iCAP Q

Analysis index: 19

Analysis name: 282jian

Analysis started at: 8/31/2021 5:08:00 PM

User name: WINDOWS-UPCI4ER\Administrator

| Category    | Concentration average | Concentration RSD |
|-------------|-----------------------|-------------------|
| 9Be (KED)   | 0.066 ppb             | 49.5 %            |
| 11B (KED)   | 5.424 ppb             | 8.8 %             |
| 24Mg (KED)  | 1,188.106 ppb         | 2.3 %             |
| 27Al (KED)  | 1,721.812 ppb         | 0.5 %             |
| 51V (KED)   | 3.415 ppb             | 2.2 %             |
| 52Cr (KED)  | 6.868 ppb             | 0.6 %             |
| 55Mn (KED)  | 41.143 ppb            | 2.8 %             |
| 56Fe (KED)  | 1,847.231 ppb         | 0.4 %             |
| 58Ni (KED)  | 8.304 ppb             | 1.0 %             |
| 59Co (KED)  | 0.870 ppb             | 0.3 %             |
| 63Cu (KED)  | 9.550 ppb             | 0.8 %             |
| 64Zn (KED)  | 209.099 ppb           | 0.4 %             |
| 69Ga (KED)  | 3.668 ppb             | 2.5 %             |
| 75As (KED)  | 1.027 ppb             | 3.6 %             |
| 80Se (KED)  | 2.120 ppb             | 7.7 %             |
| 85Rb (KED)  | 4.587 ppb             | 1.1 %             |
| 88Sr (KED)  | 12.284 ppb            | 3.4 %             |
| 107Ag (KED) | 0.059 ppb             | 4.2 %             |
| 114Cd (KED) | 0.157 ppb             | 3.3 %             |
| 133Cs (KED) | 0.370 ppb             | 4.3 %             |
| 138Ba (KED) | 9.492 ppb             | 5.6 %             |
| 139La (KED) | 1.309 ppb             | 4.6 %             |
| 140Ce (KED) | 2.726 ppb             | 2.9 %             |
| 141Pr (KED) | 0.308 ppb             | 2.0 %             |
| 142Nd (KED) | 1.645 ppb             | 4.2 %             |
| 152Sm (KED) | 0.214 ppb             | 5.1 %             |
| 153Eu (KED) | 0.044 ppb             | 2.9 %             |
| 158Gd (KED) | 0.188 ppb             | 5.7 %             |
| 164Dy (KED) | 0.130 ppb             | 6.4 %             |
| 165Ho (KED) | 0.024 ppb             | 6.3 %             |
| 166Er (KED) | 0.061 ppb             | 4.3 %             |
| 169Tm (KED) | 0.009 ppb             | 4.9 %             |
| 174Yb (KED) | 0.053 ppb             | 10.5 %            |
| 175Lu (KED) | 0.008 ppb             | 7.0 %             |
| 205Tl (KED) | 0.015 ppb             | 3.4 %             |
| 208Pb (KED) | 1.218 ppb             | 5.8 %             |
| 232Th (KED) | 0.312 ppb             | 5.8 %             |
| 238U (KED)  | 0.075 ppb             | 4.7 %             |

| Category   | Concentration average | Intensity average | Intensity RSD |
|------------|-----------------------|-------------------|---------------|
| 9Be (KED)  | 0.066 ppb             | 8 cps             | 49.5 %        |
| 11B (KED)  | 5.424 ppb             | 519 cps           | 5.8 %         |
| 24Mg (KED) | 1,188.106 ppb         | 493,055 cps       | 2.3 %         |
| 27Al (KED) | 1,721.812 ppb         | 171,029 cps       | 0.5 %         |
| 51V (KED)  | 3.415 ppb             | 21,709 cps        | 2.2 %         |
| 52Cr (KED) | 6.868 ppb             | 68,380 cps        | 0.6 %         |
| 55Mn (KED) | 41.143 ppb            | 191,865 cps       | 2.8 %         |
| 56Fe (KED) | 1,847.231 ppb         | 16,714,838 cps    | 0.4 %         |
| 58Ni (KED) | 8.304 ppb             | 102,972 cps       | 1.0 %         |
| 59Co (KED) | 0.870 ppb             | 17,157 cps        | 0.3 %         |

| Category    | Concentration average | Intensity average | Intensity RSD |
|-------------|-----------------------|-------------------|---------------|
| 63Cu (KED)  | 9.550 ppb             | 148,520 cps       | 0.8 %         |
| 64Zn (KED)  | 209.099 ppb           | 774,331 cps       | 0.4 %         |
| 69Ga (KED)  | 3.668 ppb             | 17,176 cps        | 2.4 %         |
| 75As (KED)  | 1.027 ppb             | 1,128 cps         | 3.5 %         |
| 80Se (KED)  | 2.120 ppb             | 1,309 cps         | 3.9 %         |
| 85Rb (KED)  | 4.587 ppb             | 18,773 cps        | 1.1 %         |
| 88Sr (KED)  | 12.284 ppb            | 69,450 cps        | 3.4 %         |
| 107Ag (KED) | 0.059 ppb             | 2,770 cps         | 3.9 %         |
| 114Cd (KED) | 0.157 ppb             | 2,839 cps         | 2.9 %         |
| 133Cs (KED) | 0.370 ppb             | 8,110 cps         | 4.3 %         |
| 138Ba (KED) | 9.492 ppb             | 309,501 cps       | 5.5 %         |
| 139La (KED) | 1.309 ppb             | 87,564 cps        | 4.6 %         |
| 140Ce (KED) | 2.726 ppb             | 249,490 cps       | 2.9 %         |
| 141Pr (KED) | 0.308 ppb             | 28,690 cps        | 2.0 %         |
| 142Nd (KED) | 1.645 ppb             | 64,191 cps        | 4.2 %         |
| 152Sm (KED) | 0.214 ppb             | 7,820 cps         | 5.1 %         |
| 153Eu (KED) | 0.044 ppb             | 3,085 cps         | 2.9 %         |
| 158Gd (KED) | 0.188 ppb             | 9,881 cps         | 5.6 %         |
| 164Dy (KED) | 0.130 ppb             | 7,329 cps         | 6.4 %         |
| 165Ho (KED) | 0.024 ppb             | 4,858 cps         | 6.3 %         |
| 166Er (KED) | 0.061 ppb             | 4,472 cps         | 4.1 %         |
| 169Tm (KED) | 0.009 ppb             | 2,068 cps         | 4.8 %         |
| 174Yb (KED) | 0.053 ppb             | 4,487 cps         | 10.5 %        |
| 175Lu (KED) | 0.008 ppb             | 964 cps           | 7.0 %         |
| 205Tl (KED) | 0.015 ppb             | 2,578 cps         | 3.4 %         |
| 208Pb (KED) | 1.218 ppb             | 163,108 cps       | 5.3 %         |
| 232Th (KED) | 0.312 ppb             | 72,818 cps        | 5.8 %         |
| 238U (KED)  | 0.075 ppb             | 20,304 cps        | 4.7 %         |

## Sample Summary

Instrument ID: iCAP Q

Analysis index: 20

Analysis name: 17013jian

Analysis started at: 8/31/2021 5:11:29 PM

User name: WINDOWS-UPCI4ER\Administrator

| Category    | Concentration average | Concentration RSD |
|-------------|-----------------------|-------------------|
| 9Be (KED)   | 0.038 ppb             | 43.3 %            |
| 11B (KED)   | 10.743 ppb            | 15.0 %            |
| 24Mg (KED)  | 1,718.639 ppb         | 2.6 %             |
| 27Al (KED)  | 1,332.363 ppb         | 2.0 %             |
| 51V (KED)   | 2.764 ppb             | 2.9 %             |
| 52Cr (KED)  | 6.674 ppb             | 3.6 %             |
| 55Mn (KED)  | 38.769 ppb            | 2.8 %             |
| 56Fe (KED)  | 1,473.518 ppb         | 2.1 %             |
| 58Ni (KED)  | 6.320 ppb             | 1.0 %             |
| 59Co (KED)  | 0.717 ppb             | 3.4 %             |
| 63Cu (KED)  | 12.635 ppb            | 2.9 %             |
| 64Zn (KED)  | 182.246 ppb           | 1.6 %             |
| 69Ga (KED)  | 3.645 ppb             | 1.8 %             |
| 75As (KED)  | 0.705 ppb             | 6.0 %             |
| 80Se (KED)  | 1.790 ppb             | 7.6 %             |
| 85Rb (KED)  | 4.297 ppb             | 0.7 %             |
| 88Sr (KED)  | 21.704 ppb            | 1.3 %             |
| 107Ag (KED) | 0.575 ppb             | 2.5 %             |
| 114Cd (KED) | 0.110 ppb             | 2.7 %             |
| 133Cs (KED) | 0.291 ppb             | 2.9 %             |
| 138Ba (KED) | 9.750 ppb             | 0.9 %             |
| 139La (KED) | 1.027 ppb             | 3.0 %             |
| 140Ce (KED) | 2.123 ppb             | 0.6 %             |
| 141Pr (KED) | 0.239 ppb             | 1.4 %             |
| 142Nd (KED) | 1.261 ppb             | 1.8 %             |
| 152Sm (KED) | 0.168 ppb             | 2.9 %             |
| 153Eu (KED) | 0.034 ppb             | 5.1 %             |
| 158Gd (KED) | 0.146 ppb             | 3.2 %             |
| 164Dy (KED) | 0.106 ppb             | 2.4 %             |
| 165Ho (KED) | 0.021 ppb             | 4.3 %             |
| 166Er (KED) | 0.053 ppb             | 4.8 %             |
| 169Tm (KED) | 0.007 ppb             | 3.6 %             |
| 174Yb (KED) | 0.046 ppb             | 2.0 %             |
| 175Lu (KED) | 0.006 ppb             | 2.8 %             |
| 205Tl (KED) | 0.015 ppb             | 2.9 %             |
| 208Pb (KED) | 0.983 ppb             | 2.1 %             |
| 232Th (KED) | 0.230 ppb             | 2.1 %             |
| 238U (KED)  | 0.072 ppb             | 1.5 %             |

| Category   | Concentration average | Intensity average | Intensity RSD |
|------------|-----------------------|-------------------|---------------|
| 9Be (KED)  | 0.038 ppb             | 4 cps             | 43.3 %        |
| 11B (KED)  | 10.743 ppb            | 853 cps           | 11.9 %        |
| 24Mg (KED) | 1,718.639 ppb         | 712,898 cps       | 2.6 %         |
| 27Al (KED) | 1,332.363 ppb         | 132,363 cps       | 2.0 %         |
| 51V (KED)  | 2.764 ppb             | 17,570 cps        | 2.9 %         |
| 52Cr (KED) | 6.674 ppb             | 66,457 cps        | 3.5 %         |
| 55Mn (KED) | 38.769 ppb            | 180,804 cps       | 2.8 %         |
| 56Fe (KED) | 1,473.518 ppb         | 13,334,517 cps    | 2.1 %         |
| 58Ni (KED) | 6.320 ppb             | 78,939 cps        | 1.0 %         |
| 59Co (KED) | 0.717 ppb             | 14,131 cps        | 3.4 %         |

| Category    | Concentration average | Intensity average | Intensity RSD |
|-------------|-----------------------|-------------------|---------------|
| 63Cu (KED)  | 12.635 ppb            | 195,466 cps       | 2.9 %         |
| 64Zn (KED)  | 182.246 ppb           | 675,797 cps       | 1.6 %         |
| 69Ga (KED)  | 3.645 ppb             | 17,072 cps        | 1.8 %         |
| 75As (KED)  | 0.705 ppb             | 781 cps           | 5.8 %         |
| 80Se (KED)  | 1.790 ppb             | 1,206 cps         | 3.6 %         |
| 85Rb (KED)  | 4.297 ppb             | 17,588 cps        | 0.7 %         |
| 88Sr (KED)  | 21.704 ppb            | 122,548 cps       | 1.3 %         |
| 107Ag (KED) | 0.575 ppb             | 25,606 cps        | 2.5 %         |
| 114Cd (KED) | 0.110 ppb             | 2,106 cps         | 2.2 %         |
| 133Cs (KED) | 0.291 ppb             | 6,389 cps         | 2.9 %         |
| 138Ba (KED) | 9.750 ppb             | 317,647 cps       | 0.9 %         |
| 139La (KED) | 1.027 ppb             | 68,764 cps        | 3.0 %         |
| 140Ce (KED) | 2.123 ppb             | 194,317 cps       | 0.6 %         |
| 141Pr (KED) | 0.239 ppb             | 22,242 cps        | 1.4 %         |
| 142Nd (KED) | 1.261 ppb             | 49,228 cps        | 1.8 %         |
| 152Sm (KED) | 0.168 ppb             | 6,118 cps         | 2.9 %         |
| 153Eu (KED) | 0.034 ppb             | 2,367 cps         | 5.1 %         |
| 158Gd (KED) | 0.146 ppb             | 7,645 cps         | 3.2 %         |
| 164Dy (KED) | 0.106 ppb             | 5,998 cps         | 2.4 %         |
| 165Ho (KED) | 0.021 ppb             | 4,162 cps         | 4.3 %         |
| 166Er (KED) | 0.053 ppb             | 3,873 cps         | 4.5 %         |
| 169Tm (KED) | 0.007 ppb             | 1,661 cps         | 3.6 %         |
| 174Yb (KED) | 0.046 ppb             | 3,829 cps         | 2.0 %         |
| 175Lu (KED) | 0.006 ppb             | 787 cps           | 2.8 %         |
| 205Tl (KED) | 0.015 ppb             | 2,569 cps         | 2.9 %         |
| 208Pb (KED) | 0.983 ppb             | 134,291 cps       | 1.9 %         |
| 232Th (KED) | 0.230 ppb             | 53,832 cps        | 2.1 %         |
| 238U (KED)  | 0.072 ppb             | 19,473 cps        | 1.5 %         |

## Sample Summary

Instrument ID: iCAP Q

Analysis index: 21

Analysis name: 284jian

Analysis started at: 8/31/2021 5:14:49 PM

User name: WINDOWS-UPCI4ER\Administrator

| Category    | Concentration average | Concentration RSD |
|-------------|-----------------------|-------------------|
| 9Be (KED)   | 0.047 ppb             | 34.6 %            |
| 11B (KED)   | 7.385 ppb             | 6.8 %             |
| 24Mg (KED)  | 883.181 ppb           | 1.1 %             |
| 27Al (KED)  | 1,263.081 ppb         | 0.9 %             |
| 51V (KED)   | 2.522 ppb             | 2.4 %             |
| 52Cr (KED)  | 6.172 ppb             | 0.8 %             |
| 55Mn (KED)  | 30.098 ppb            | 1.3 %             |
| 56Fe (KED)  | 1,418.465 ppb         | 0.6 %             |
| 58Ni (KED)  | 6.872 ppb             | 1.5 %             |
| 59Co (KED)  | 0.676 ppb             | 1.2 %             |
| 63Cu (KED)  | 9.588 ppb             | 0.6 %             |
| 64Zn (KED)  | 182.263 ppb           | 0.4 %             |
| 69Ga (KED)  | 2.941 ppb             | 1.5 %             |
| 75As (KED)  | 0.934 ppb             | 5.6 %             |
| 80Se (KED)  | 1.911 ppb             | 8.7 %             |
| 85Rb (KED)  | 4.601 ppb             | 1.5 %             |
| 88Sr (KED)  | 10.314 ppb            | 1.7 %             |
| 107Ag (KED) | 0.071 ppb             | 5.4 %             |
| 114Cd (KED) | 0.101 ppb             | 2.6 %             |
| 133Cs (KED) | 0.277 ppb             | 4.9 %             |
| 138Ba (KED) | 7.995 ppb             | 1.2 %             |
| 139La (KED) | 0.948 ppb             | 2.5 %             |
| 140Ce (KED) | 1.957 ppb             | 1.2 %             |
| 141Pr (KED) | 0.228 ppb             | 1.3 %             |
| 142Nd (KED) | 1.197 ppb             | 2.1 %             |
| 152Sm (KED) | 0.166 ppb             | 6.4 %             |
| 153Eu (KED) | 0.031 ppb             | 6.4 %             |
| 158Gd (KED) | 0.138 ppb             | 2.7 %             |
| 164Dy (KED) | 0.102 ppb             | 3.0 %             |
| 165Ho (KED) | 0.019 ppb             | 2.3 %             |
| 166Er (KED) | 0.048 ppb             | 5.4 %             |
| 169Tm (KED) | 0.007 ppb             | 1.5 %             |
| 174Yb (KED) | 0.040 ppb             | 2.4 %             |
| 175Lu (KED) | 0.006 ppb             | 17.0 %            |
| 205Tl (KED) | 0.014 ppb             | 2.3 %             |
| 208Pb (KED) | 1.346 ppb             | 1.9 %             |
| 232Th (KED) | 0.226 ppb             | 2.2 %             |
| 238U (KED)  | 0.065 ppb             | 1.9 %             |

| Category   | Concentration average | Intensity average | Intensity RSD |
|------------|-----------------------|-------------------|---------------|
| 9Be (KED)  | 0.047 ppb             | 6 cps             | 34.6 %        |
| 11B (KED)  | 7.385 ppb             | 642 cps           | 4.9 %         |
| 24Mg (KED) | 883.181 ppb           | 366,699 cps       | 1.1 %         |
| 27Al (KED) | 1,263.081 ppb         | 125,484 cps       | 0.9 %         |
| 51V (KED)  | 2.522 ppb             | 16,035 cps        | 2.4 %         |
| 52Cr (KED) | 6.172 ppb             | 61,474 cps        | 0.8 %         |
| 55Mn (KED) | 30.098 ppb            | 140,412 cps       | 1.3 %         |
| 56Fe (KED) | 1,418.465 ppb         | 12,836,553 cps    | 0.6 %         |
| 58Ni (KED) | 6.872 ppb             | 85,623 cps        | 1.5 %         |
| 59Co (KED) | 0.676 ppb             | 13,328 cps        | 1.2 %         |

| Category    | Concentration average | Intensity average | Intensity RSD |
|-------------|-----------------------|-------------------|---------------|
| 63Cu (KED)  | 9.588 ppb             | 149,094 cps       | 0.6 %         |
| 64Zn (KED)  | 182.263 ppb           | 675,860 cps       | 0.4 %         |
| 69Ga (KED)  | 2.941 ppb             | 13,890 cps        | 1.4 %         |
| 75As (KED)  | 0.934 ppb             | 1,028 cps         | 5.4 %         |
| 80Se (KED)  | 1.911 ppb             | 1,243 cps         | 4.2 %         |
| 85Rb (KED)  | 4.601 ppb             | 18,832 cps        | 1.5 %         |
| 88Sr (KED)  | 10.314 ppb            | 58,349 cps        | 1.7 %         |
| 107Ag (KED) | 0.071 ppb             | 3,303 cps         | 5.1 %         |
| 114Cd (KED) | 0.101 ppb             | 1,952 cps         | 2.2 %         |
| 133Cs (KED) | 0.277 ppb             | 6,074 cps         | 4.9 %         |
| 138Ba (KED) | 7.995 ppb             | 262,326 cps       | 1.2 %         |
| 139La (KED) | 0.948 ppb             | 63,442 cps        | 2.5 %         |
| 140Ce (KED) | 1.957 ppb             | 179,148 cps       | 1.2 %         |
| 141Pr (KED) | 0.228 ppb             | 21,228 cps        | 1.3 %         |
| 142Nd (KED) | 1.197 ppb             | 46,711 cps        | 2.1 %         |
| 152Sm (KED) | 0.166 ppb             | 6,038 cps         | 6.4 %         |
| 153Eu (KED) | 0.031 ppb             | 2,154 cps         | 6.4 %         |
| 158Gd (KED) | 0.138 ppb             | 7,238 cps         | 2.7 %         |
| 164Dy (KED) | 0.102 ppb             | 5,771 cps         | 3.0 %         |
| 165Ho (KED) | 0.019 ppb             | 3,766 cps         | 2.3 %         |
| 166Er (KED) | 0.048 ppb             | 3,557 cps         | 5.1 %         |
| 169Tm (KED) | 0.007 ppb             | 1,557 cps         | 1.5 %         |
| 174Yb (KED) | 0.040 ppb             | 3,339 cps         | 2.4 %         |
| 175Lu (KED) | 0.006 ppb             | 764 cps           | 17.0 %        |
| 205Tl (KED) | 0.014 ppb             | 2,367 cps         | 2.3 %         |
| 208Pb (KED) | 1.346 ppb             | 178,851 cps       | 1.7 %         |
| 232Th (KED) | 0.226 ppb             | 52,847 cps        | 2.2 %         |
| 238U (KED)  | 0.065 ppb             | 17,601 cps        | 1.9 %         |

## Sample Summary

Instrument ID: iCAP Q

Analysis index: 22

Analysis name: 294jian

Analysis started at: 8/31/2021 5:18:34 PM

User name: WINDOWS-UPCI4ER\Administrator

| Category    | Concentration average | Concentration RSD |
|-------------|-----------------------|-------------------|
| 9Be (KED)   | 0.038 ppb             | 86.6 %            |
| 11B (KED)   | 2.597 ppb             | 25.7 %            |
| 24Mg (KED)  | 604.941 ppb           | 0.7 %             |
| 27Al (KED)  | 850.614 ppb           | 1.7 %             |
| 51V (KED)   | 1.498 ppb             | 1.5 %             |
| 52Cr (KED)  | 4.885 ppb             | 1.2 %             |
| 55Mn (KED)  | 18.753 ppb            | 0.8 %             |
| 56Fe (KED)  | 768.279 ppb           | 1.3 %             |
| 58Ni (KED)  | 3.697 ppb             | 0.5 %             |
| 59Co (KED)  | 0.458 ppb             | 1.5 %             |
| 63Cu (KED)  | 7.492 ppb             | 1.6 %             |
| 64Zn (KED)  | 216.754 ppb           | 0.6 %             |
| 69Ga (KED)  | 2.158 ppb             | 1.5 %             |
| 75As (KED)  | 0.582 ppb             | 4.3 %             |
| 80Se (KED)  | 1.971 ppb             | 5.7 %             |
| 85Rb (KED)  | 4.262 ppb             | 0.9 %             |
| 88Sr (KED)  | 8.064 ppb             | 0.6 %             |
| 107Ag (KED) | 0.140 ppb             | 2.5 %             |
| 114Cd (KED) | 0.152 ppb             | 2.9 %             |
| 133Cs (KED) | 0.168 ppb             | 1.7 %             |
| 138Ba (KED) | 6.088 ppb             | 0.9 %             |
| 139La (KED) | 0.552 ppb             | 1.8 %             |
| 140Ce (KED) | 1.132 ppb             | 1.9 %             |
| 141Pr (KED) | 0.125 ppb             | 3.5 %             |
| 142Nd (KED) | 0.678 ppb             | 1.4 %             |
| 152Sm (KED) | 0.095 ppb             | 3.4 %             |
| 153Eu (KED) | 0.018 ppb             | 8.2 %             |
| 158Gd (KED) | 0.080 ppb             | 1.7 %             |
| 164Dy (KED) | 0.057 ppb             | 6.0 %             |
| 165Ho (KED) | 0.011 ppb             | 2.0 %             |
| 166Er (KED) | 0.025 ppb             | 6.9 %             |
| 169Tm (KED) | 0.004 ppb             | 8.1 %             |
| 174Yb (KED) | 0.023 ppb             | 7.1 %             |
| 175Lu (KED) | 0.003 ppb             | 7.3 %             |
| 205Tl (KED) | 0.011 ppb             | 7.8 %             |
| 208Pb (KED) | 1.039 ppb             | 1.6 %             |
| 232Th (KED) | 0.155 ppb             | 2.0 %             |
| 238U (KED)  | 0.044 ppb             | 1.9 %             |

| Category   | Concentration average | Intensity average | Intensity RSD |
|------------|-----------------------|-------------------|---------------|
| 9Be (KED)  | 0.038 ppb             | 4 cps             | 86.6 %        |
| 11B (KED)  | 2.597 ppb             | 341 cps           | 12.3 %        |
| 24Mg (KED) | 604.941 ppb           | 251,401 cps       | 0.7 %         |
| 27Al (KED) | 850.614 ppb           | 84,533 cps        | 1.7 %         |
| 51V (KED)  | 1.498 ppb             | 9,520 cps         | 1.5 %         |
| 52Cr (KED) | 4.885 ppb             | 48,697 cps        | 1.2 %         |
| 55Mn (KED) | 18.753 ppb            | 87,558 cps        | 0.8 %         |
| 56Fe (KED) | 768.279 ppb           | 6,955,456 cps     | 1.3 %         |
| 58Ni (KED) | 3.697 ppb             | 47,149 cps        | 0.5 %         |
| 59Co (KED) | 0.458 ppb             | 9,043 cps         | 1.5 %         |

| Category    | Concentration average | Intensity average | Intensity RSD |
|-------------|-----------------------|-------------------|---------------|
| 63Cu (KED)  | 7.492 ppb             | 117,200 cps       | 1.6 %         |
| 64Zn (KED)  | 216.754 ppb           | 802,420 cps       | 0.6 %         |
| 69Ga (KED)  | 2.158 ppb             | 10,345 cps        | 1.4 %         |
| 75As (KED)  | 0.582 ppb             | 649 cps           | 4.2 %         |
| 80Se (KED)  | 1.971 ppb             | 1,262 cps         | 2.8 %         |
| 85Rb (KED)  | 4.262 ppb             | 17,446 cps        | 0.9 %         |
| 88Sr (KED)  | 8.064 ppb             | 45,662 cps        | 0.6 %         |
| 107Ag (KED) | 0.140 ppb             | 6,373 cps         | 2.5 %         |
| 114Cd (KED) | 0.152 ppb             | 2,764 cps         | 2.5 %         |
| 133Cs (KED) | 0.168 ppb             | 3,684 cps         | 1.7 %         |
| 138Ba (KED) | 6.088 ppb             | 202,242 cps       | 0.9 %         |
| 139La (KED) | 0.552 ppb             | 36,970 cps        | 1.8 %         |
| 140Ce (KED) | 1.132 ppb             | 103,678 cps       | 1.9 %         |
| 141Pr (KED) | 0.125 ppb             | 11,661 cps        | 3.5 %         |
| 142Nd (KED) | 0.678 ppb             | 26,480 cps        | 1.4 %         |
| 152Sm (KED) | 0.095 ppb             | 3,453 cps         | 3.4 %         |
| 153Eu (KED) | 0.018 ppb             | 1,242 cps         | 8.1 %         |
| 158Gd (KED) | 0.080 ppb             | 4,181 cps         | 1.7 %         |
| 164Dy (KED) | 0.057 ppb             | 3,213 cps         | 6.0 %         |
| 165Ho (KED) | 0.011 ppb             | 2,144 cps         | 2.0 %         |
| 166Er (KED) | 0.025 ppb             | 1,995 cps         | 6.1 %         |
| 169Tm (KED) | 0.004 ppb             | 842 cps           | 8.1 %         |
| 174Yb (KED) | 0.023 ppb             | 1,911 cps         | 7.1 %         |
| 175Lu (KED) | 0.003 ppb             | 426 cps           | 7.3 %         |
| 205Tl (KED) | 0.011 ppb             | 1,908 cps         | 7.8 %         |
| 208Pb (KED) | 1.039 ppb             | 141,165 cps       | 1.5 %         |
| 232Th (KED) | 0.155 ppb             | 36,206 cps        | 2.0 %         |
| 238U (KED)  | 0.044 ppb             | 12,079 cps        | 1.9 %         |

## Sample Summary

Instrument ID: iCAP Q

Analysis index: 23

Analysis name: 316jian

Analysis started at: 8/31/2021 5:22:03 PM

User name: WINDOWS-UPCI4ER\Administrator

| Category    | Concentration average | Concentration RSD |
|-------------|-----------------------|-------------------|
| 9Be (KED)   | 0.019 ppb             | 86.6 %            |
| 11B (KED)   | 4.435 ppb             | 12.9 %            |
| 24Mg (KED)  | 634.257 ppb           | 1.5 %             |
| 27Al (KED)  | 841.949 ppb           | 0.6 %             |
| 51V (KED)   | 1.551 ppb             | 1.1 %             |
| 52Cr (KED)  | 4.749 ppb             | 1.2 %             |
| 55Mn (KED)  | 20.663 ppb            | 1.4 %             |
| 56Fe (KED)  | 837.577 ppb           | 0.5 %             |
| 58Ni (KED)  | 4.101 ppb             | 2.9 %             |
| 59Co (KED)  | 0.388 ppb             | 3.1 %             |
| 63Cu (KED)  | 7.224 ppb             | 1.5 %             |
| 64Zn (KED)  | 188.240 ppb           | 1.1 %             |
| 69Ga (KED)  | 1.942 ppb             | 2.3 %             |
| 75As (KED)  | 0.691 ppb             | 1.6 %             |
| 80Se (KED)  | 1.836 ppb             | 27.7 %            |
| 85Rb (KED)  | 4.552 ppb             | 0.5 %             |
| 88Sr (KED)  | 7.106 ppb             | 1.5 %             |
| 107Ag (KED) | 0.040 ppb             | 2.1 %             |
| 114Cd (KED) | 0.148 ppb             | 4.5 %             |
| 133Cs (KED) | 0.185 ppb             | 5.4 %             |
| 138Ba (KED) | 5.674 ppb             | 1.4 %             |
| 139La (KED) | 0.625 ppb             | 1.4 %             |
| 140Ce (KED) | 1.301 ppb             | 0.6 %             |
| 141Pr (KED) | 0.146 ppb             | 1.6 %             |
| 142Nd (KED) | 0.780 ppb             | 4.6 %             |
| 152Sm (KED) | 0.108 ppb             | 3.2 %             |
| 153Eu (KED) | 0.020 ppb             | 7.7 %             |
| 158Gd (KED) | 0.093 ppb             | 1.9 %             |
| 164Dy (KED) | 0.064 ppb             | 2.0 %             |
| 165Ho (KED) | 0.013 ppb             | 4.4 %             |
| 166Er (KED) | 0.030 ppb             | 1.1 %             |
| 169Tm (KED) | 0.004 ppb             | 4.6 %             |
| 174Yb (KED) | 0.026 ppb             | 5.8 %             |
| 175Lu (KED) | 0.004 ppb             | 12.5 %            |
| 205Tl (KED) | 0.010 ppb             | 1.3 %             |
| 208Pb (KED) | 0.926 ppb             | 3.0 %             |
| 232Th (KED) | 0.161 ppb             | 3.7 %             |
| 238U (KED)  | 0.043 ppb             | 3.3 %             |

| Category   | Concentration average | Intensity average | Intensity RSD |
|------------|-----------------------|-------------------|---------------|
| 9Be (KED)  | 0.019 ppb             | 2 cps             | 86.6 %        |
| 11B (KED)  | 4.435 ppb             | 457 cps           | 7.9 %         |
| 24Mg (KED) | 634.257 ppb           | 263,549 cps       | 1.5 %         |
| 27Al (KED) | 841.949 ppb           | 83,673 cps        | 0.6 %         |
| 51V (KED)  | 1.551 ppb             | 9,859 cps         | 1.1 %         |
| 52Cr (KED) | 4.749 ppb             | 47,353 cps        | 1.2 %         |
| 55Mn (KED) | 20.663 ppb            | 96,456 cps        | 1.4 %         |
| 56Fe (KED) | 837.577 ppb           | 7,582,275 cps     | 0.5 %         |
| 58Ni (KED) | 4.101 ppb             | 52,039 cps        | 2.8 %         |
| 59Co (KED) | 0.388 ppb             | 7,653 cps         | 3.1 %         |

| Category    | Concentration average | Intensity average | Intensity RSD |
|-------------|-----------------------|-------------------|---------------|
| 63Cu (KED)  | 7.224 ppb             | 113,129 cps       | 1.5 %         |
| 64Zn (KED)  | 188.240 ppb           | 697,792 cps       | 1.0 %         |
| 69Ga (KED)  | 1.942 ppb             | 9,367 cps         | 2.2 %         |
| 75As (KED)  | 0.691 ppb             | 767 cps           | 1.6 %         |
| 80Se (KED)  | 1.836 ppb             | 1,220 cps         | 13.1 %        |
| 85Rb (KED)  | 4.552 ppb             | 18,628 cps        | 0.5 %         |
| 88Sr (KED)  | 7.106 ppb             | 40,266 cps        | 1.5 %         |
| 107Ag (KED) | 0.040 ppb             | 1,922 cps         | 1.9 %         |
| 114Cd (KED) | 0.148 ppb             | 2,705 cps         | 3.9 %         |
| 133Cs (KED) | 0.185 ppb             | 4,063 cps         | 5.4 %         |
| 138Ba (KED) | 5.674 ppb             | 189,185 cps       | 1.4 %         |
| 139La (KED) | 0.625 ppb             | 41,852 cps        | 1.4 %         |
| 140Ce (KED) | 1.301 ppb             | 119,112 cps       | 0.6 %         |
| 141Pr (KED) | 0.146 ppb             | 13,645 cps        | 1.6 %         |
| 142Nd (KED) | 0.780 ppb             | 30,465 cps        | 4.6 %         |
| 152Sm (KED) | 0.108 ppb             | 3,951 cps         | 3.2 %         |
| 153Eu (KED) | 0.020 ppb             | 1,409 cps         | 7.6 %         |
| 158Gd (KED) | 0.093 ppb             | 4,869 cps         | 1.9 %         |
| 164Dy (KED) | 0.064 ppb             | 3,603 cps         | 2.0 %         |
| 165Ho (KED) | 0.013 ppb             | 2,531 cps         | 4.4 %         |
| 166Er (KED) | 0.030 ppb             | 2,287 cps         | 1.0 %         |
| 169Tm (KED) | 0.004 ppb             | 968 cps           | 4.6 %         |
| 174Yb (KED) | 0.026 ppb             | 2,188 cps         | 5.8 %         |
| 175Lu (KED) | 0.004 ppb             | 473 cps           | 12.5 %        |
| 205Tl (KED) | 0.010 ppb             | 1,826 cps         | 1.3 %         |
| 208Pb (KED) | 0.926 ppb             | 127,334 cps       | 2.7 %         |
| 232Th (KED) | 0.161 ppb             | 37,765 cps        | 3.7 %         |
| 238U (KED)  | 0.043 ppb             | 11,750 cps        | 3.3 %         |

## Sample Summary

Instrument ID: iCAP Q

Analysis index: 24

Analysis name: 308jian

Analysis started at: 8/31/2021 5:25:37 PM

User name: WINDOWS-UPCI4ER\Administrator

| Category    | Concentration average | Concentration RSD |
|-------------|-----------------------|-------------------|
| 9Be (KED)   | 0.009 ppb             | 173.2 %           |
| 11B (KED)   | 6.626 ppb             | 4.8 %             |
| 24Mg (KED)  | 802.130 ppb           | 1.8 %             |
| 27Al (KED)  | 1,248.072 ppb         | 1.0 %             |
| 51V (KED)   | 2.223 ppb             | 0.9 %             |
| 52Cr (KED)  | 5.224 ppb             | 0.4 %             |
| 55Mn (KED)  | 26.894 ppb            | 0.9 %             |
| 56Fe (KED)  | 1,187.264 ppb         | 1.1 %             |
| 58Ni (KED)  | 5.268 ppb             | 1.3 %             |
| 59Co (KED)  | 0.576 ppb             | 2.2 %             |
| 63Cu (KED)  | 8.171 ppb             | 0.9 %             |
| 64Zn (KED)  | 203.162 ppb           | 0.4 %             |
| 69Ga (KED)  | 2.649 ppb             | 2.0 %             |
| 75As (KED)  | 0.917 ppb             | 2.9 %             |
| 80Se (KED)  | 2.191 ppb             | 7.8 %             |
| 85Rb (KED)  | 3.795 ppb             | 3.3 %             |
| 88Sr (KED)  | 9.822 ppb             | 1.3 %             |
| 107Ag (KED) | 0.074 ppb             | 2.5 %             |
| 114Cd (KED) | 0.125 ppb             | 8.4 %             |
| 133Cs (KED) | 0.284 ppb             | 2.4 %             |
| 138Ba (KED) | 8.208 ppb             | 1.1 %             |
| 139La (KED) | 0.850 ppb             | 1.0 %             |
| 140Ce (KED) | 1.788 ppb             | 2.5 %             |
| 141Pr (KED) | 0.207 ppb             | 3.0 %             |
| 142Nd (KED) | 1.081 ppb             | 2.6 %             |
| 152Sm (KED) | 0.144 ppb             | 4.5 %             |
| 153Eu (KED) | 0.029 ppb             | 4.4 %             |
| 158Gd (KED) | 0.130 ppb             | 2.2 %             |
| 164Dy (KED) | 0.093 ppb             | 2.1 %             |
| 165Ho (KED) | 0.018 ppb             | 1.7 %             |
| 166Er (KED) | 0.044 ppb             | 2.6 %             |
| 169Tm (KED) | 0.007 ppb             | 5.3 %             |
| 174Yb (KED) | 0.039 ppb             | 2.7 %             |
| 175Lu (KED) | 0.005 ppb             | 9.1 %             |
| 205Tl (KED) | 0.014 ppb             | 5.3 %             |
| 208Pb (KED) | 1.072 ppb             | 2.4 %             |
| 232Th (KED) | 0.229 ppb             | 2.3 %             |
| 238U (KED)  | 0.063 ppb             | 2.0 %             |

| Category   | Concentration average | Intensity average | Intensity RSD |
|------------|-----------------------|-------------------|---------------|
| 9Be (KED)  | 0.009 ppb             | 1 cps             | 173.2 %       |
| 11B (KED)  | 6.626 ppb             | 594 cps           | 3.4 %         |
| 24Mg (KED) | 802.130 ppb           | 333,113 cps       | 1.8 %         |
| 27Al (KED) | 1,248.072 ppb         | 123,994 cps       | 1.0 %         |
| 51V (KED)  | 2.223 ppb             | 14,130 cps        | 0.9 %         |
| 52Cr (KED) | 5.224 ppb             | 52,059 cps        | 0.4 %         |
| 55Mn (KED) | 26.894 ppb            | 125,485 cps       | 0.9 %         |
| 56Fe (KED) | 1,187.264 ppb         | 10,745,281 cps    | 1.1 %         |
| 58Ni (KED) | 5.268 ppb             | 66,191 cps        | 1.3 %         |
| 59Co (KED) | 0.576 ppb             | 11,370 cps        | 2.2 %         |

| Category    | Concentration average | Intensity average | Intensity RSD |
|-------------|-----------------------|-------------------|---------------|
| 63Cu (KED)  | 8.171 ppb             | 127,535 cps       | 0.9 %         |
| 64Zn (KED)  | 203.162 ppb           | 752,545 cps       | 0.4 %         |
| 69Ga (KED)  | 2.649 ppb             | 12,566 cps        | 1.9 %         |
| 75As (KED)  | 0.917 ppb             | 1,010 cps         | 2.9 %         |
| 80Se (KED)  | 2.191 ppb             | 1,331 cps         | 4.0 %         |
| 85Rb (KED)  | 3.795 ppb             | 15,541 cps        | 3.3 %         |
| 88Sr (KED)  | 9.822 ppb             | 55,571 cps        | 1.3 %         |
| 107Ag (KED) | 0.074 ppb             | 3,453 cps         | 2.4 %         |
| 114Cd (KED) | 0.125 ppb             | 2,342 cps         | 7.1 %         |
| 133Cs (KED) | 0.284 ppb             | 6,238 cps         | 2.4 %         |
| 138Ba (KED) | 8.208 ppb             | 269,065 cps       | 1.1 %         |
| 139La (KED) | 0.850 ppb             | 56,867 cps        | 1.0 %         |
| 140Ce (KED) | 1.788 ppb             | 163,702 cps       | 2.5 %         |
| 141Pr (KED) | 0.207 ppb             | 19,266 cps        | 3.0 %         |
| 142Nd (KED) | 1.081 ppb             | 42,201 cps        | 2.6 %         |
| 152Sm (KED) | 0.144 ppb             | 5,243 cps         | 4.5 %         |
| 153Eu (KED) | 0.029 ppb             | 2,024 cps         | 4.4 %         |
| 158Gd (KED) | 0.130 ppb             | 6,819 cps         | 2.2 %         |
| 164Dy (KED) | 0.093 ppb             | 5,280 cps         | 2.1 %         |
| 165Ho (KED) | 0.018 ppb             | 3,609 cps         | 1.7 %         |
| 166Er (KED) | 0.044 ppb             | 3,244 cps         | 2.4 %         |
| 169Tm (KED) | 0.007 ppb             | 1,490 cps         | 5.3 %         |
| 174Yb (KED) | 0.039 ppb             | 3,240 cps         | 2.7 %         |
| 175Lu (KED) | 0.005 ppb             | 658 cps           | 9.1 %         |
| 205Tl (KED) | 0.014 ppb             | 2,380 cps         | 5.3 %         |
| 208Pb (KED) | 1.072 ppb             | 145,233 cps       | 2.2 %         |
| 232Th (KED) | 0.229 ppb             | 53,508 cps        | 2.3 %         |
| 238U (KED)  | 0.063 ppb             | 17,199 cps        | 2.0 %         |

## Sample Summary

Instrument ID: iCAP Q

Analysis index: 25

Analysis name: 302jian

Analysis started at: 8/31/2021 5:29:04 PM

User name: WINDOWS-UPCI4ER\Administrator

| Category    | Concentration average | Concentration RSD |
|-------------|-----------------------|-------------------|
| 9Be (KED)   | 0.028 ppb             | 100.0 %           |
| 11B (KED)   | 8.799 ppb             | 12.7 %            |
| 24Mg (KED)  | 1,088.917 ppb         | 1.1 %             |
| 27Al (KED)  | 1,514.936 ppb         | 1.3 %             |
| 51V (KED)   | 3.000 ppb             | 1.0 %             |
| 52Cr (KED)  | 10.791 ppb            | 1.0 %             |
| 55Mn (KED)  | 37.490 ppb            | 0.8 %             |
| 56Fe (KED)  | 1,603.505 ppb         | 1.2 %             |
| 58Ni (KED)  | 7.354 ppb             | 1.2 %             |
| 59Co (KED)  | 0.783 ppb             | 1.0 %             |
| 63Cu (KED)  | 8.969 ppb             | 0.6 %             |
| 64Zn (KED)  | 194.217 ppb           | 0.5 %             |
| 69Ga (KED)  | 3.256 ppb             | 2.5 %             |
| 75As (KED)  | 0.996 ppb             | 10.0 %            |
| 80Se (KED)  | 2.014 ppb             | 7.3 %             |
| 85Rb (KED)  | 5.300 ppb             | 1.0 %             |
| 88Sr (KED)  | 13.135 ppb            | 1.4 %             |
| 107Ag (KED) | 0.064 ppb             | 5.3 %             |
| 114Cd (KED) | 0.139 ppb             | 5.3 %             |
| 133Cs (KED) | 0.336 ppb             | 2.4 %             |
| 138Ba (KED) | 9.726 ppb             | 1.1 %             |
| 139La (KED) | 1.194 ppb             | 1.6 %             |
| 140Ce (KED) | 2.524 ppb             | 3.0 %             |
| 141Pr (KED) | 0.290 ppb             | 4.5 %             |
| 142Nd (KED) | 1.529 ppb             | 0.5 %             |
| 152Sm (KED) | 0.214 ppb             | 3.3 %             |
| 153Eu (KED) | 0.042 ppb             | 3.4 %             |
| 158Gd (KED) | 0.184 ppb             | 3.0 %             |
| 164Dy (KED) | 0.129 ppb             | 1.2 %             |
| 165Ho (KED) | 0.023 ppb             | 0.6 %             |
| 166Er (KED) | 0.064 ppb             | 3.0 %             |
| 169Tm (KED) | 0.009 ppb             | 7.3 %             |
| 174Yb (KED) | 0.050 ppb             | 5.0 %             |
| 175Lu (KED) | 0.008 ppb             | 4.9 %             |
| 205Tl (KED) | 0.016 ppb             | 2.5 %             |
| 208Pb (KED) | 1.446 ppb             | 2.3 %             |
| 232Th (KED) | 0.308 ppb             | 1.3 %             |
| 238U (KED)  | 0.078 ppb             | 0.6 %             |

| Category   | Concentration average | Intensity average | Intensity RSD |
|------------|-----------------------|-------------------|---------------|
| 9Be (KED)  | 0.028 ppb             | 3 cps             | 100.0 %       |
| 11B (KED)  | 8.799 ppb             | 731 cps           | 9.6 %         |
| 24Mg (KED) | 1,088.917 ppb         | 451,952 cps       | 1.1 %         |
| 27Al (KED) | 1,514.936 ppb         | 150,490 cps       | 1.3 %         |
| 51V (KED)  | 3.000 ppb             | 19,071 cps        | 1.0 %         |
| 52Cr (KED) | 10.791 ppb            | 107,324 cps       | 1.0 %         |
| 55Mn (KED) | 37.490 ppb            | 174,845 cps       | 0.8 %         |
| 56Fe (KED) | 1,603.505 ppb         | 14,510,283 cps    | 1.2 %         |
| 58Ni (KED) | 7.354 ppb             | 91,467 cps        | 1.2 %         |
| 59Co (KED) | 0.783 ppb             | 15,441 cps        | 1.0 %         |

| Category    | Concentration average | Intensity average | Intensity RSD |
|-------------|-----------------------|-------------------|---------------|
| 63Cu (KED)  | 8.969 ppb             | 139,682 cps       | 0.6 %         |
| 64Zn (KED)  | 194.217 ppb           | 719,724 cps       | 0.5 %         |
| 69Ga (KED)  | 3.256 ppb             | 15,314 cps        | 2.4 %         |
| 75As (KED)  | 0.996 ppb             | 1,094 cps         | 9.8 %         |
| 80Se (KED)  | 2.014 ppb             | 1,276 cps         | 3.6 %         |
| 85Rb (KED)  | 5.300 ppb             | 21,682 cps        | 1.0 %         |
| 88Sr (KED)  | 13.135 ppb            | 74,249 cps        | 1.4 %         |
| 107Ag (KED) | 0.064 ppb             | 3,006 cps         | 5.0 %         |
| 114Cd (KED) | 0.139 ppb             | 2,566 cps         | 4.6 %         |
| 133Cs (KED) | 0.336 ppb             | 7,356 cps         | 2.4 %         |
| 138Ba (KED) | 9.726 ppb             | 316,875 cps       | 1.0 %         |
| 139La (KED) | 1.194 ppb             | 79,909 cps        | 1.6 %         |
| 140Ce (KED) | 2.524 ppb             | 230,995 cps       | 3.0 %         |
| 141Pr (KED) | 0.290 ppb             | 27,018 cps        | 4.5 %         |
| 142Nd (KED) | 1.529 ppb             | 59,652 cps        | 0.5 %         |
| 152Sm (KED) | 0.214 ppb             | 7,796 cps         | 3.3 %         |
| 153Eu (KED) | 0.042 ppb             | 2,945 cps         | 3.4 %         |
| 158Gd (KED) | 0.184 ppb             | 9,645 cps         | 3.0 %         |
| 164Dy (KED) | 0.129 ppb             | 7,318 cps         | 1.2 %         |
| 165Ho (KED) | 0.023 ppb             | 4,662 cps         | 0.6 %         |
| 166Er (KED) | 0.064 ppb             | 4,658 cps         | 2.8 %         |
| 169Tm (KED) | 0.009 ppb             | 1,982 cps         | 7.3 %         |
| 174Yb (KED) | 0.050 ppb             | 4,206 cps         | 5.0 %         |
| 175Lu (KED) | 0.008 ppb             | 944 cps           | 4.9 %         |
| 205Tl (KED) | 0.016 ppb             | 2,758 cps         | 2.5 %         |
| 208Pb (KED) | 1.446 ppb             | 191,100 cps       | 2.1 %         |
| 232Th (KED) | 0.308 ppb             | 71,898 cps        | 1.3 %         |
| 238U (KED)  | 0.078 ppb             | 21,271 cps        | 0.6 %         |
