# Supplementary material for: Geographic and breed-specific traceability of cashmere via mineral element profiling in Inner Mongolia (Ordos, Chifeng, and Alxa League)
Source: Royal Society of Chemistry journal article supplement (doi:10.1039/d5ra08122j), 2026-01-01
Supplement: d5ra08122j1.zip [file 20210901-a zuo qi ̧1+Ų19.pdf › ԭʼ޿/20210901-a zuo qi ̧1+Ų19.pdf]

## Instrument Summary:

Instrument ID: iCAP Q  
Serial Number: Undefined

## Labbook Summary:

Path and filename: \_Application Data\Workspace\LabBooks\wlw\20210901-1.imexp  
Labbook created by: Administrator  
Based on template:  
Hardware configuration: iCAPQ1  
Labbook type: eQuant  
Qtegra version (last saved): 2.7.2425.154  
Labbook started: 9/1/2021 3:47:06 PM  
Labbook finished: 9/1/2021 5:14:16 PM

## Method Summary:

| Isotope     | Mode | Dwell time (s) | # of Channels | Spacing | Resolution | IS |
|-------------|------|----------------|---------------|---------|------------|----|
| 9Be (KED)   | KED  | 0.03           | 3             | 0.1     | Normal     |    |
| 11B (KED)   | KED  | 0.03           | 3             | 0.1     | Normal     |    |
| 24Mg (KED)  | KED  | 0.03           | 3             | 0.1     | Normal     |    |
| 27Al (KED)  | KED  | 0.03           | 3             | 0.1     | Normal     |    |
| 51V (KED)   | KED  | 0.03           | 3             | 0.1     | Normal     |    |
| 52Cr (KED)  | KED  | 0.03           | 3             | 0.1     | Normal     |    |
| 55Mn (KED)  | KED  | 0.03           | 3             | 0.1     | Normal     |    |
| 56Fe (KED)  | KED  | 0.03           | 3             | 0.1     | Normal     |    |
| 58Ni (KED)  | KED  | 0.03           | 3             | 0.1     | Normal     |    |
| 59Co (KED)  | KED  | 0.03           | 3             | 0.1     | Normal     |    |
| 63Cu (KED)  | KED  | 0.03           | 3             | 0.1     | Normal     |    |
| 64Zn (KED)  | KED  | 0.03           | 3             | 0.1     | Normal     |    |
| 69Ga (KED)  | KED  | 0.03           | 3             | 0.1     | Normal     |    |
| 75As (KED)  | KED  | 0.03           | 3             | 0.1     | Normal     |    |
| 80Se (KED)  | KED  | 0.03           | 3             | 0.1     | Normal     |    |
| 85Rb (KED)  | KED  | 0.03           | 3             | 0.1     | Normal     |    |
| 88Sr (KED)  | KED  | 0.03           | 3             | 0.1     | Normal     |    |
| 107Ag (KED) | KED  | 0.03           | 3             | 0.1     | Normal     |    |
| 114Cd (KED) | KED  | 0.03           | 3             | 0.1     | Normal     |    |
| 133Cs (KED) | KED  | 0.03           | 3             | 0.1     | Normal     |    |
| 138Ba (KED) | KED  | 0.03           | 3             | 0.1     | Normal     |    |
| 139La (KED) | KED  | 0.03           | 3             | 0.1     | Normal     |    |
| 140Ce (KED) | KED  | 0.03           | 3             | 0.1     | Normal     |    |
| 141Pr (KED) | KED  | 0.03           | 3             | 0.1     | Normal     |    |
| 142Nd (KED) | KED  | 0.03           | 3             | 0.1     | Normal     |    |
| 152Sm (KED) | KED  | 0.03           | 3             | 0.1     | Normal     |    |
| 153Eu (KED) | KED  | 0.03           | 3             | 0.1     | Normal     |    |
| 158Gd (KED) | KED  | 0.03           | 3             | 0.1     | Normal     |    |
| 164Dy (KED) | KED  | 0.03           | 3             | 0.1     | Normal     |    |
| 165Ho (KED) | KED  | 0.03           | 3             | 0.1     | Normal     |    |
| 166Er (KED) | KED  | 0.03           | 3             | 0.1     | Normal     |    |
| 169Tm (KED) | KED  | 0.03           | 3             | 0.1     | Normal     |    |
| 174Yb (KED) | KED  | 0.03           | 3             | 0.1     | Normal     |    |
| 175Lu (KED) | KED  | 0.03           | 3             | 0.1     | Normal     |    |
| 205Tl (KED) | KED  | 0.03           | 3             | 0.1     | Normal     |    |
| 208Pb (KED) | KED  | 0.03           | 3             | 0.1     | Normal     |    |
| 232Th (KED) | KED  | 0.03           | 3             | 0.1     | Normal     |    |
| 238U (KED)  | KED  | 0.03           | 3             | 0.1     | Normal     |    |

| Isotope    | Mode | Dwell time (s) | # of Channels | Spacing | Resolution |
|------------|------|----------------|---------------|---------|------------|
| 9Be (KED)  | KED  | 0.03           | 3             | 0.1     | Normal     |
| 11B (KED)  | KED  | 0.03           | 3             | 0.1     | Normal     |
| 24Mg (KED) | KED  | 0.03           | 3             | 0.1     | Normal     |
| 27Al (KED) | KED  | 0.03           | 3             | 0.1     | Normal     |
| 51V (KED)  | KED  | 0.03           | 3             | 0.1     | Normal     |
| 52Cr (KED) | KED  | 0.03           | 3             | 0.1     | Normal     |
| 55Mn (KED) | KED  | 0.03           | 3             | 0.1     | Normal     |
| 56Fe (KED) | KED  | 0.03           | 3             | 0.1     | Normal     |
| 58Ni (KED) | KED  | 0.03           | 3             | 0.1     | Normal     |
| 59Co (KED) | KED  | 0.03           | 3             | 0.1     | Normal     |
| 63Cu (KED) | KED  | 0.03           | 3             | 0.1     | Normal     |
| 64Zn (KED) | KED  | 0.03           | 3             | 0.1     | Normal     |
| 69Ga (KED) | KED  | 0.03           | 3             | 0.1     | Normal     |
| 75As (KED) | KED  | 0.03           | 3             | 0.1     | Normal     |
| 80Se (KED) | KED  | 0.03           | 3             | 0.1     | Normal     |
| 85Rb (KED) | KED  | 0.03           | 3             | 0.1     | Normal     |
| 88Sr (KED) | KED  | 0.03           | 3             | 0.1     | Normal     |

| Isotope     | Mode | Dwell time (s) | # of Channels | Spacing | Resolution |
|-------------|------|----------------|---------------|---------|------------|
| 107Ag (KED) | KED  | 0.03           | 3             | 0.1     | Normal     |
| 114Cd (KED) | KED  | 0.03           | 3             | 0.1     | Normal     |
| 133Cs (KED) | KED  | 0.03           | 3             | 0.1     | Normal     |
| 138Ba (KED) | KED  | 0.03           | 3             | 0.1     | Normal     |
| 139La (KED) | KED  | 0.03           | 3             | 0.1     | Normal     |
| 140Ce (KED) | KED  | 0.03           | 3             | 0.1     | Normal     |
| 141Pr (KED) | KED  | 0.03           | 3             | 0.1     | Normal     |
| 142Nd (KED) | KED  | 0.03           | 3             | 0.1     | Normal     |
| 152Sm (KED) | KED  | 0.03           | 3             | 0.1     | Normal     |
| 153Eu (KED) | KED  | 0.03           | 3             | 0.1     | Normal     |
| 158Gd (KED) | KED  | 0.03           | 3             | 0.1     | Normal     |
| 164Dy (KED) | KED  | 0.03           | 3             | 0.1     | Normal     |
| 165Ho (KED) | KED  | 0.03           | 3             | 0.1     | Normal     |
| 166Er (KED) | KED  | 0.03           | 3             | 0.1     | Normal     |
| 169Tm (KED) | KED  | 0.03           | 3             | 0.1     | Normal     |
| 174Yb (KED) | KED  | 0.03           | 3             | 0.1     | Normal     |
| 175Lu (KED) | KED  | 0.03           | 3             | 0.1     | Normal     |
| 205Tl (KED) | KED  | 0.03           | 3             | 0.1     | Normal     |
| 208Pb (KED) | KED  | 0.03           | 3             | 0.1     | Normal     |
| 232Th (KED) | KED  | 0.03           | 3             | 0.1     | Normal     |
| 238U (KED)  | KED  | 0.03           | 3             | 0.1     | Normal     |

| No. of sweeps | Time per sweep[s] | Time per main run[s] |
|---------------|-------------------|----------------------|
| 10            | 3.42              | 34.2                 |

## Calibration Curves:

9Be (KED)

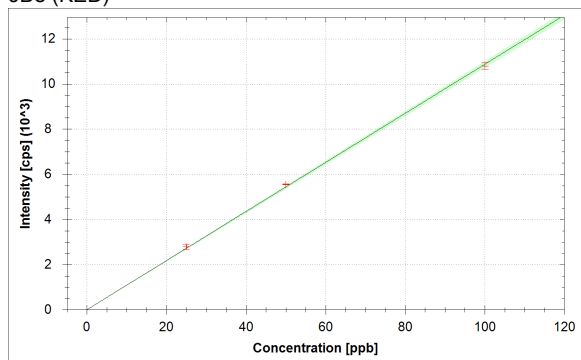

$$f(x) = 108.6843 \cdot x + 1.1111$$

$$R^2 = 0.9996$$

$$\text{BEC} = 0.010 \text{ ppb}$$

$$\text{LoD} = 0.0531 \text{ ppb}$$

11B (KED)

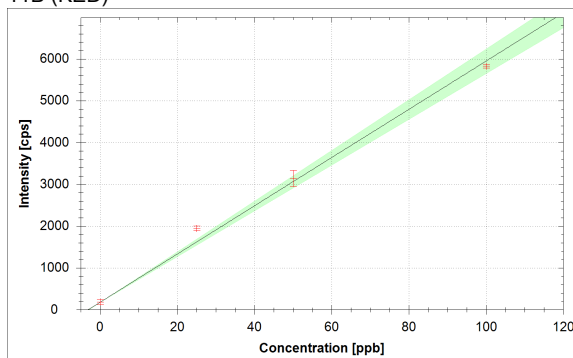

$$f(x) = 57.6693 \cdot x + 180.0022$$

$$R^2 = 0.9925$$

$$\text{BEC} = 3.121 \text{ ppb}$$

$$\text{LoD} = 3.1549 \text{ ppb}$$

24Mg (KED)

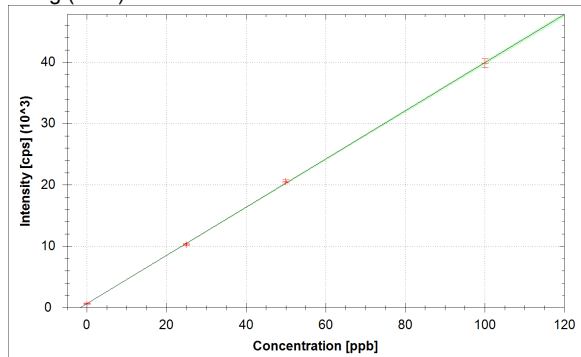

$$f(x) = 392.7357 \cdot x + 641.1292$$

$$R^2 = 0.9999$$

$$\text{BEC} = 1.632 \text{ ppb}$$

$$\text{LoD} = 0.8618 \text{ ppb}$$

27Al (KED)

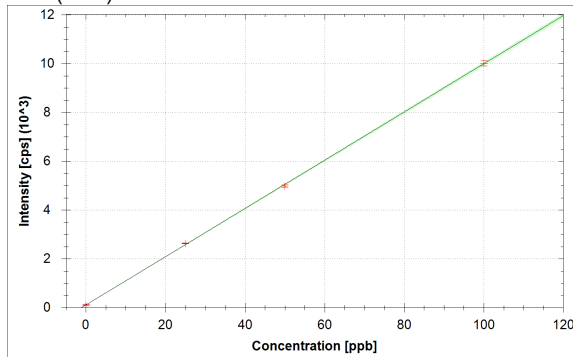

$$f(x) = 98.8540 \cdot x + 107.7784$$

$$R^2 = 0.9998$$

$$\text{BEC} = 1.090 \text{ ppb}$$

$$\text{LoD} = 0.7177 \text{ ppb}$$

51V (KED)

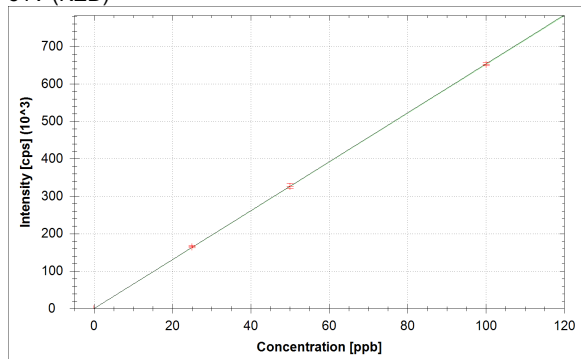

$$f(x) = 6530.2349 \cdot x + 10.0000$$

$$R^2 = 1.0000$$

$$\text{BEC} = 0.002 \text{ ppb}$$

$$\text{LoD} = 0.0041 \text{ ppb}$$

52Cr (KED)

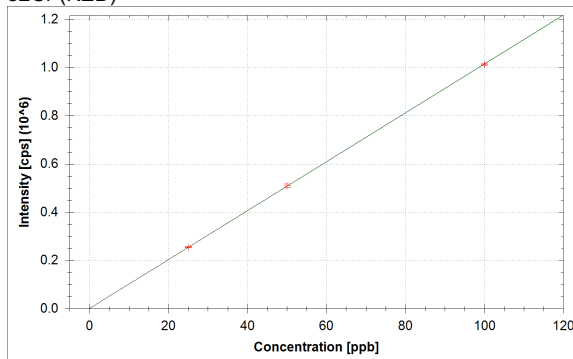

$$f(x) = 10141.9696 \cdot x + 256.6698$$

$$R^2 = 1.0000$$

$$\text{BEC} = 0.025 \text{ ppb}$$

$$\text{LoD} = 0.0088 \text{ ppb}$$

55Mn (KED)

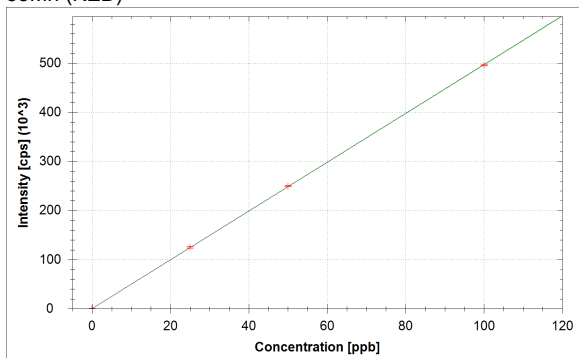

$$f(x) = 4967.0963 \cdot x + 238.8915$$

$$R^2 = 1.0000$$

$$\text{BEC} = 0.048 \text{ ppb}$$

$$\text{LoD} = 0.0176 \text{ ppb}$$

56Fe (KED)

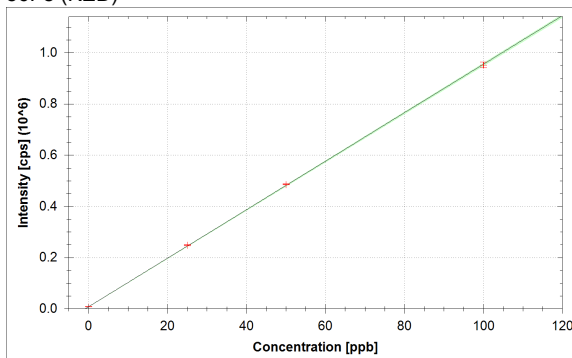

$$f(x) = 9471.8537 \cdot x + 7665.6995$$

$$R^2 = 0.9999$$

$$\text{BEC} = 0.809 \text{ ppb}$$

$$\text{LoD} = 0.0840 \text{ ppb}$$

58Ni (KED)

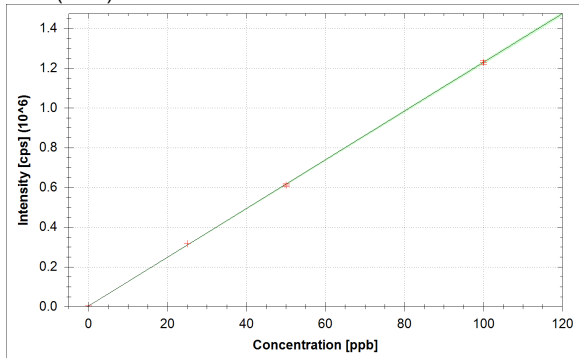

$$f(x) = 12260.6982 \cdot x + 2923.6791$$

$$R^2 = 0.9999$$

$$\text{BEC} = 0.238 \text{ ppb}$$

$$\text{LoD} = 0.0185 \text{ ppb}$$

59Co (KED)

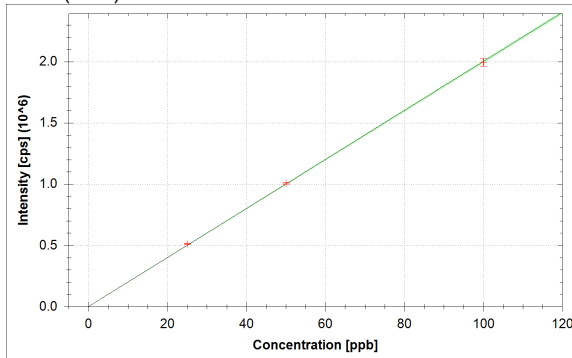

$$f(x) = 20014.0107 \cdot x + 16.6667$$

$$R^2 = 0.9999$$

$$\text{BEC} = 0.001 \text{ ppb}$$

$$\text{LoD} = 0.0005 \text{ ppb}$$

63Cu (KED)

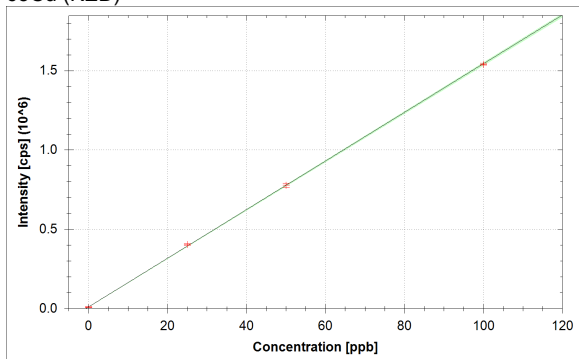

$$f(x) = 15327.7277 \cdot x + 10093.3970$$

$$R^2 = 0.9999$$

$$\text{BEC} = 0.659 \text{ ppb}$$

$$\text{LoD} = 0.6470 \text{ ppb}$$

64Zn (KED)

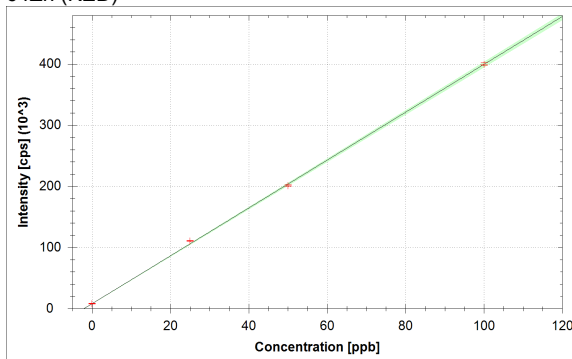

$$f(x) = 3914.4747 \cdot x + 8009.2539$$

$$R^2 = 0.9997$$

$$\text{BEC} = 2.046 \text{ ppb}$$

$$\text{LoD} = 0.3464 \text{ ppb}$$

69Ga (KED)

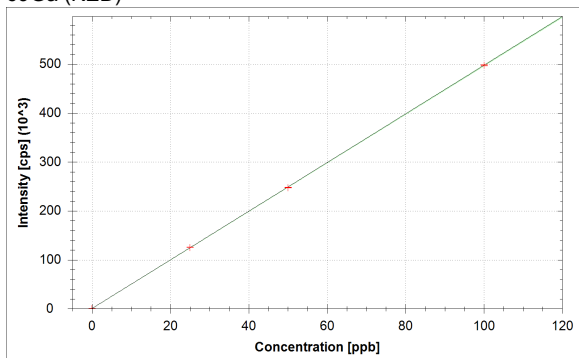

$$f(x) = 4971.0277 \cdot x + 491.1238$$

$$R^2 = 1.0000$$

$$\text{BEC} = 0.099 \text{ ppb}$$

$$\text{LoD} = 0.0493 \text{ ppb}$$

75As (KED)

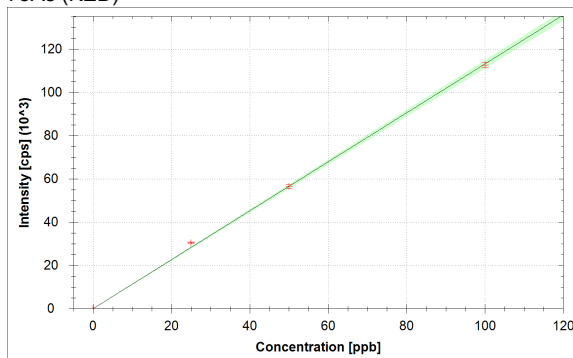

$$f(x) = 1131.8055 \cdot x + 31.1112$$

$$R^2 = 0.9993$$

$$\text{BEC} = 0.027 \text{ ppb}$$

$$\text{LoD} = 0.0051 \text{ ppb}$$

80Se (KED)

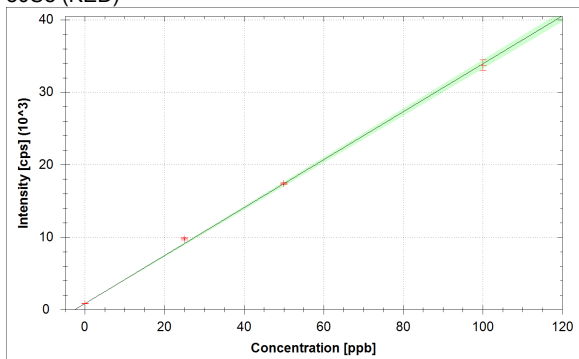

$$f(x) = 330.7985 \cdot x + 826.6956$$

$$R^2 = 0.9992$$

$$\text{BEC} = 2.499 \text{ ppb}$$

$$\text{LoD} = 0.1839 \text{ ppb}$$

85Rb (KED)

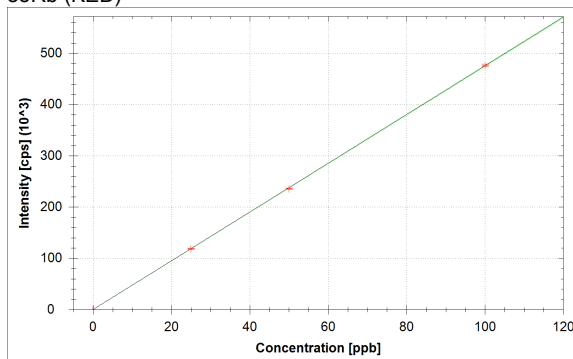

$$f(x) = 4754.0260 \cdot x + 77.7782$$

$$R^2 = 1.0000$$

$$\text{BEC} = 0.016 \text{ ppb}$$

$$\text{LoD} = 0.0191 \text{ ppb}$$

88Sr (KED)

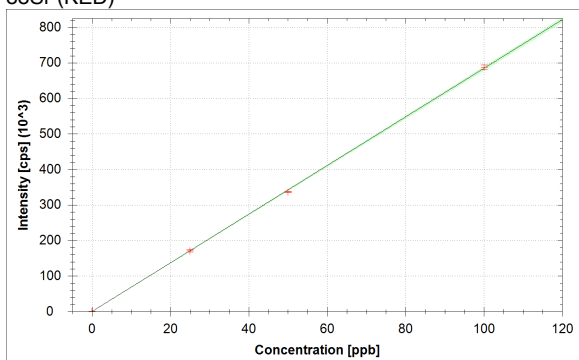

$$f(x) = 6843.0428 \cdot x + 280.0038$$

$$R^2 = 0.9998$$

$$\text{BEC} = 0.041 \text{ ppb}$$

$$\text{LoD} = 0.0279 \text{ ppb}$$

107Ag (KED)

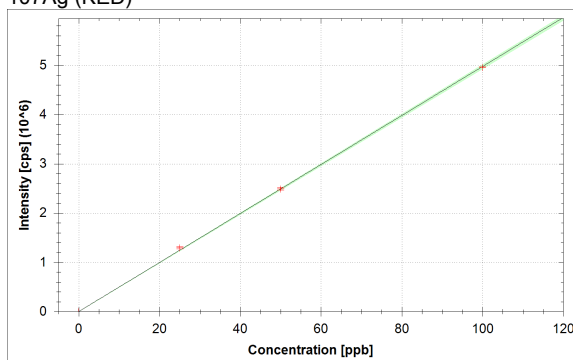

$$f(x) = 49743.8577 \cdot x + 533.3455$$

$$R^2 = 0.9998$$

$$\text{BEC} = 0.011 \text{ ppb}$$

$$\text{LoD} = 0.0019 \text{ ppb}$$

**<sup>114</sup>Cd (KED)**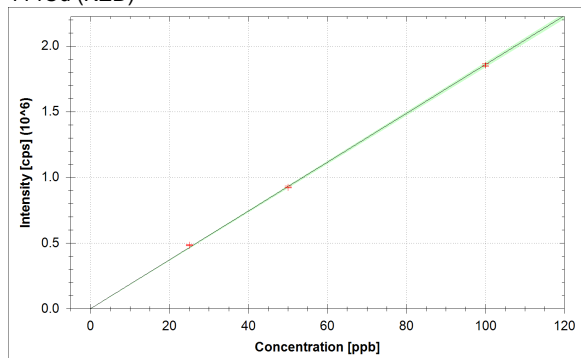

$$f(x) = 18576.3307 \cdot x + 496.6770$$

$$R^2 = 0.9998$$

$$\text{BEC} = 0.027 \text{ ppb}$$

$$\text{LoD} = 0.0081 \text{ ppb}$$

**<sup>133</sup>Cs (KED)**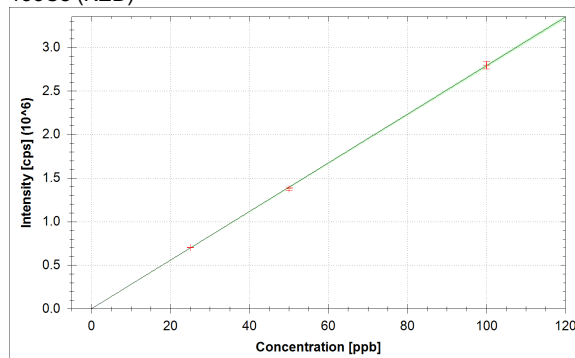

$$f(x) = 27885.8712 \cdot x + 20.0000$$

$$R^2 = 0.9999$$

$$\text{BEC} = 0.001 \text{ ppb}$$

$$\text{LoD} = 0.0004 \text{ ppb}$$

**<sup>138</sup>Ba (KED)**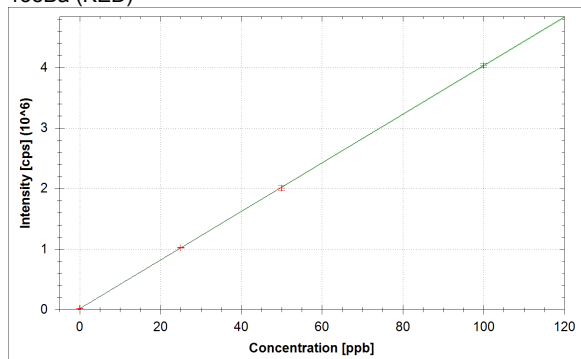

$$f(x) = 40167.7687 \cdot x + 15176.1651$$

$$R^2 = 1.0000$$

$$\text{BEC} = 0.378 \text{ ppb}$$

$$\text{LoD} = 0.1410 \text{ ppb}$$

**<sup>139</sup>La (KED)**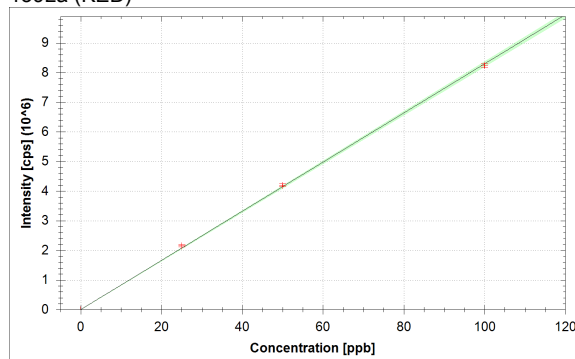

$$f(x) = 82925.0581 \cdot x + 52.2224$$

$$R^2 = 0.9997$$

$$\text{BEC} = 0.001 \text{ ppb}$$

$$\text{LoD} = 0.0004 \text{ ppb}$$

**<sup>140</sup>Ce (KED)**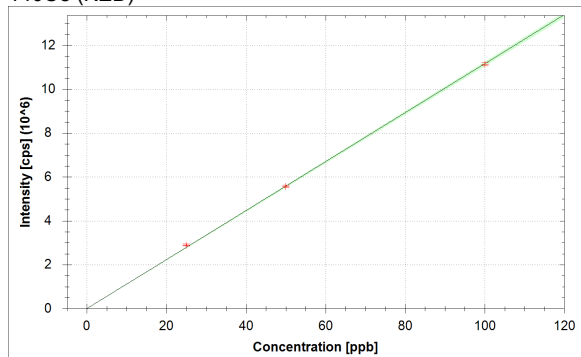

$$f(x) = 111589.0218 \cdot x + 161.1124$$

$$R^2 = 0.9998$$

$$\text{BEC} = 0.001 \text{ ppb}$$

$$\text{LoD} = 0.0005 \text{ ppb}$$

**<sup>141</sup>Pr (KED)**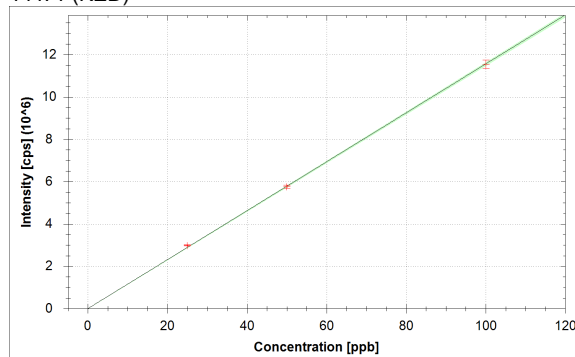

$$f(x) = 115604.0274 \cdot x + 30.0001$$

$$R^2 = 0.9999$$

$$\text{BEC} = 0.000 \text{ ppb}$$

$$\text{LoD} = 0.0002 \text{ ppb}$$

**<sup>142</sup>Nd (KED)**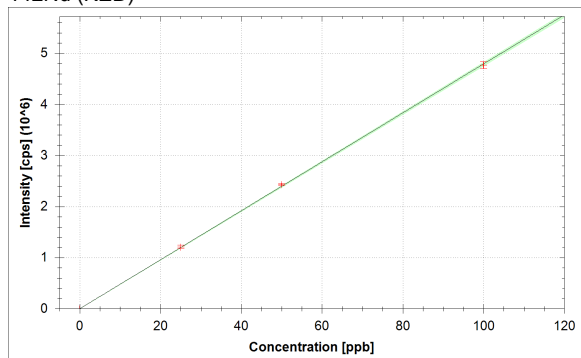

$$f(x) = 47919.5634 \cdot x + 52.2224$$

$$R^2 = 0.9998$$

$$\text{BEC} = 0.001 \text{ ppb}$$

$$\text{LoD} = 0.0010 \text{ ppb}$$

**<sup>152</sup>Sm (KED)**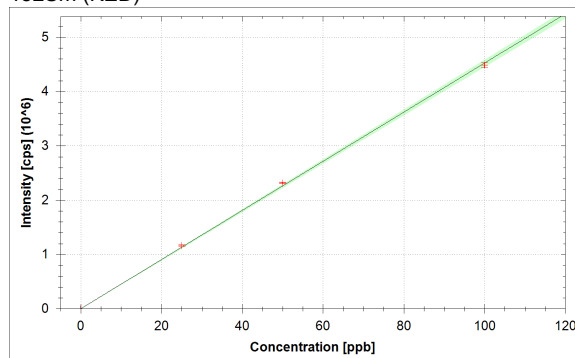

$$f(x) = 45241.9336 \cdot x + 14.4445$$

$$R^2 = 0.9995$$

$$\text{BEC} = 0.000 \text{ ppb}$$

$$\text{LoD} = 0.0005 \text{ ppb}$$

**<sup>153</sup>Eu (KED)**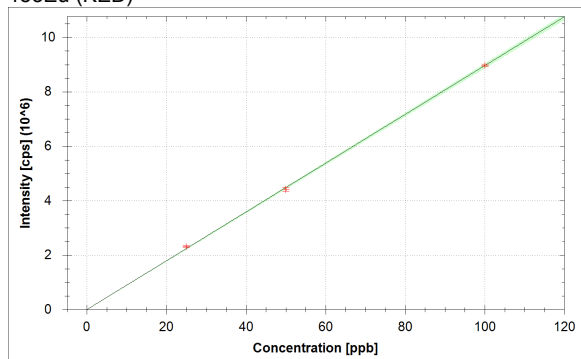

$$f(x) = 89615.0141 \cdot x + 21.1111$$

$$R^2 = 0.9998$$

$$\text{BEC} = 0.000 \text{ ppb}$$

$$\text{LoD} = 0.0003 \text{ ppb}$$

**<sup>158</sup>Gd (KED)**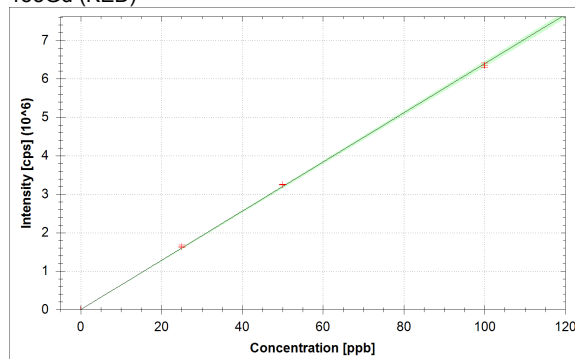

$$f(x) = 63922.7264 \cdot x + 12.2222$$

$$R^2 = 0.9997$$

$$\text{BEC} = 0.000 \text{ ppb}$$

$$\text{LoD} = 0.0003 \text{ ppb}$$

**<sup>164</sup>Dy (KED)**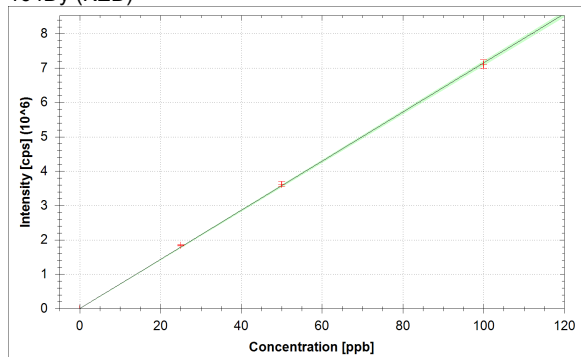

$$f(x) = 71469.8353 \cdot x + 15.5556$$

$$R^2 = 0.9998$$

$$\text{BEC} = 0.000 \text{ ppb}$$

$$\text{LoD} = 0.0003 \text{ ppb}$$

**<sup>165</sup>Ho (KED)**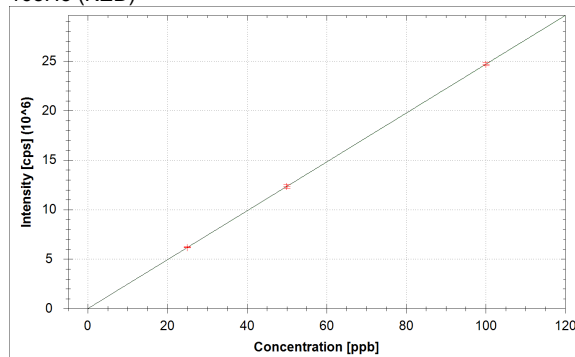

$$f(x) = 246918.6143 \cdot x + 10.0000$$

$$R^2 = 1.0000$$

$$\text{BEC} = 0.000 \text{ ppb}$$

$$\text{LoD} = 0.0000 \text{ ppb}$$

**<sup>166</sup>Er (KED)**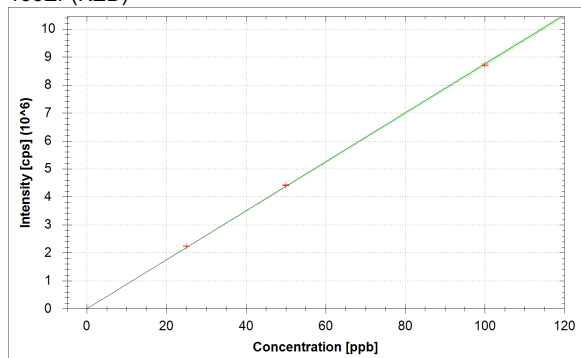

$$f(x) = 87426.9531 \cdot x + 442.2345$$

$$R^2 = 0.9999$$

$$\text{BEC} = 0.005 \text{ ppb}$$

$$\text{LoD} = 0.0058 \text{ ppb}$$

**<sup>169</sup>Tm (KED)**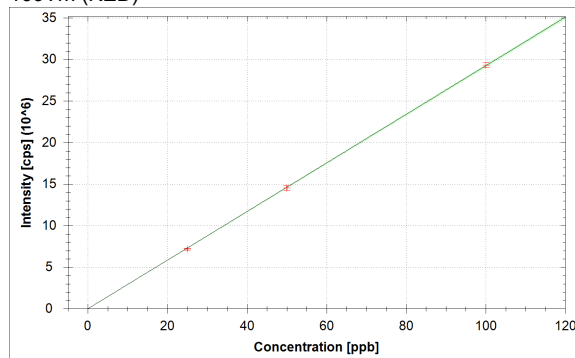

$$f(x) = 292499.0241 \cdot x + 21.1112$$

$$R^2 = 0.9999$$

$$\text{BEC} = 0.000 \text{ ppb}$$

$$\text{LoD} = 0.0001 \text{ ppb}$$

**<sup>174</sup>Yb (KED)**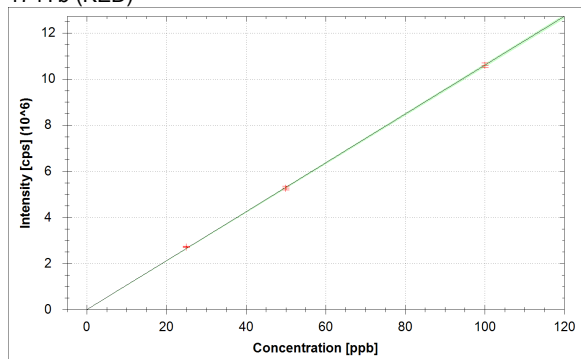

$$f(x) = 105991.3676 \cdot x + 7.7778$$

$$R^2 = 0.9999$$

$$\text{BEC} = 0.000 \text{ ppb}$$

$$\text{LoD} = 0.0001 \text{ ppb}$$

**<sup>175</sup>Lu (KED)**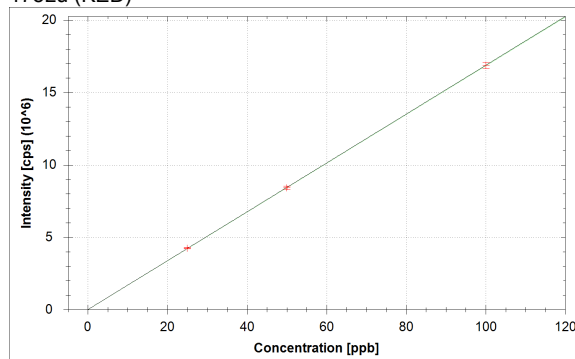

$$f(x) = 168768.4821 \cdot x + 7.7778$$

$$R^2 = 1.0000$$

$$\text{BEC} = 0.000 \text{ ppb}$$

$$\text{LoD} = 0.0001 \text{ ppb}$$

**<sup>205</sup>Tl (KED)**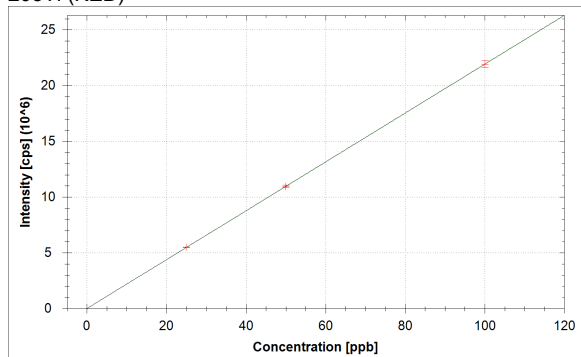

$$f(x) = 219191.7743 \cdot x + 28.8889$$

$$R^2 = 1.0000$$

$$\text{BEC} = 0.000 \text{ ppb}$$

$$\text{LoD} = 0.0001 \text{ ppb}$$

**<sup>208</sup>Pb (KED)**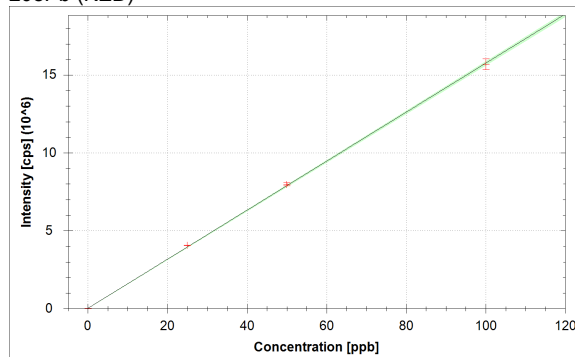

$$f(x) = 157366.5372 \cdot x + 19736.7451$$

$$R^2 = 0.9998$$

$$\text{BEC} = 0.125 \text{ ppb}$$

$$\text{LoD} = 0.0061 \text{ ppb}$$

**<sup>232</sup>Th (KED)**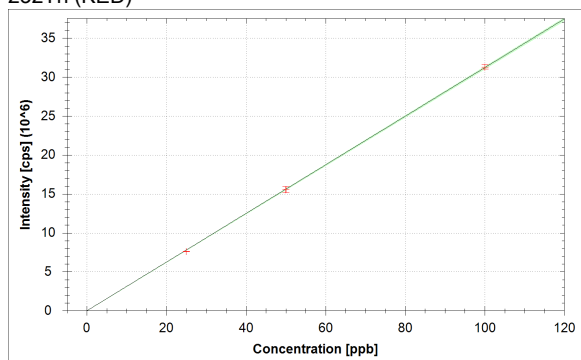

$$f(x) = 312175.6172 \cdot x + 1277.8456$$

$$R^2 = 0.9999$$

$$\text{BEC} = 0.004 \text{ ppb}$$

$$\text{LoD} = 0.0009 \text{ ppb}$$

**<sup>238</sup>U (KED)**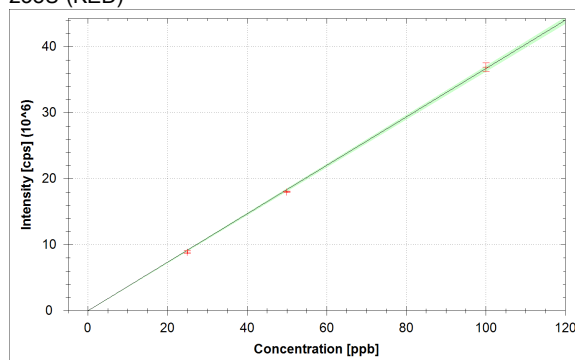

$$f(x) = 366730.8644 \cdot x + 166.6682$$

$$R^2 = 0.9997$$

$$\text{BEC} = 0.000 \text{ ppb}$$

$$\text{LoD} = 0.0003 \text{ ppb}$$

**Standards:**

Analysis Index: 3  
 Analysis Name: std1  
 Analysis Type: STD  
 Analysis Started at: 9/1/2021 3:53:47 PM  
 Standard (Stock): std1  
 Standard DF: 1

| Category    | Concentration average | Concentration RSD | Standard Concentration |
|-------------|-----------------------|-------------------|------------------------|
| 9Be (KED)   | 25.704 ppb            | 4.1 %             | 25.000 ppb             |
| 11B (KED)   | 30.656 ppb            | 2.8 %             | 25.000 ppb             |
| 24Mg (KED)  | 24.514 ppb            | 1.8 %             | 25.000 ppb             |
| 27Al (KED)  | 25.540 ppb            | 0.4 %             | 25.000 ppb             |
| 51V (KED)   | 25.275 ppb            | 1.7 %             | 25.000 ppb             |
| 52Cr (KED)  | 25.173 ppb            | 1.2 %             | 25.000 ppb             |
| 55Mn (KED)  | 25.167 ppb            | 1.4 %             | 25.000 ppb             |
| 56Fe (KED)  | 25.394 ppb            | 1.0 %             | 25.000 ppb             |
| 58Ni (KED)  | 25.627 ppb            | 0.2 %             | 25.000 ppb             |
| 59Co (KED)  | 25.600 ppb            | 0.9 %             | 25.000 ppb             |
| 63Cu (KED)  | 25.718 ppb            | 1.8 %             | 25.000 ppb             |
| 64Zn (KED)  | 26.152 ppb            | 1.1 %             | 25.000 ppb             |
| 69Ga (KED)  | 25.176 ppb            | 0.6 %             | 25.000 ppb             |
| 75As (KED)  | 26.848 ppb            | 1.2 %             | 25.000 ppb             |
| 80Se (KED)  | 27.027 ppb            | 1.8 %             | 25.000 ppb             |
| 85Rb (KED)  | 24.914 ppb            | 1.0 %             | 25.000 ppb             |
| 88Sr (KED)  | 24.899 ppb            | 1.7 %             | 25.000 ppb             |
| 107Ag (KED) | 26.038 ppb            | 2.0 %             | 25.000 ppb             |
| 114Cd (KED) | 26.092 ppb            | 1.2 %             | 25.000 ppb             |
| 133Cs (KED) | 25.163 ppb            | 0.5 %             | 25.000 ppb             |
| 138Ba (KED) | 25.079 ppb            | 0.8 %             | 25.000 ppb             |
| 139La (KED) | 25.962 ppb            | 1.9 %             | 25.000 ppb             |
| 140Ce (KED) | 25.964 ppb            | 1.3 %             | 25.000 ppb             |
| 141Pr (KED) | 25.797 ppb            | 0.9 %             | 25.000 ppb             |
| 142Nd (KED) | 25.269 ppb            | 2.7 %             | 25.000 ppb             |
| 152Sm (KED) | 25.786 ppb            | 1.8 %             | 25.000 ppb             |
| 153Eu (KED) | 25.834 ppb            | 1.0 %             | 25.000 ppb             |
| 158Gd (KED) | 25.708 ppb            | 1.9 %             | 25.000 ppb             |
| 164Dy (KED) | 25.765 ppb            | 1.2 %             | 25.000 ppb             |
| 165Ho (KED) | 25.061 ppb            | 0.8 %             | 25.000 ppb             |
| 166Er (KED) | 25.598 ppb            | 0.6 %             | 25.000 ppb             |
| 169Tm (KED) | 24.523 ppb            | 1.8 %             | 25.000 ppb             |
| 174Yb (KED) | 25.682 ppb            | 0.8 %             | 25.000 ppb             |
| 175Lu (KED) | 25.181 ppb            | 1.3 %             | 25.000 ppb             |
| 205Tl (KED) | 25.122 ppb            | 0.3 %             | 25.000 ppb             |
| 208Pb (KED) | 25.679 ppb            | 0.3 %             | 25.000 ppb             |
| 232Th (KED) | 24.386 ppb            | 0.4 %             | 25.000 ppb             |
| 238U (KED)  | 24.232 ppb            | 2.7 %             | 25.000 ppb             |

**Standards:**

Analysis Index: 4  
 Analysis Name: std2  
 Analysis Type: STD  
 Analysis Started at: 9/1/2021 3:57:46 PM  
 Standard (Stock): std2  
 Standard DF: 1

| Category    | Concentration average | Concentration RSD | Standard Concentration |
|-------------|-----------------------|-------------------|------------------------|
| 9Be (KED)   | 51.107 ppb            | 0.3 %             | 50.000 ppb             |
| 11B (KED)   | 51.334 ppb            | 6.6 %             | 50.000 ppb             |
| 24Mg (KED)  | 50.679 ppb            | 1.2 %             | 50.000 ppb             |
| 27Al (KED)  | 49.286 ppb            | 1.0 %             | 50.000 ppb             |
| 51V (KED)   | 50.049 ppb            | 2.1 %             | 50.000 ppb             |
| 52Cr (KED)  | 50.128 ppb            | 1.6 %             | 50.000 ppb             |
| 55Mn (KED)  | 50.279 ppb            | 0.6 %             | 50.000 ppb             |
| 56Fe (KED)  | 50.480 ppb            | 0.5 %             | 50.000 ppb             |
| 58Ni (KED)  | 49.571 ppb            | 1.2 %             | 50.000 ppb             |
| 59Co (KED)  | 50.323 ppb            | 0.8 %             | 50.000 ppb             |
| 63Cu (KED)  | 50.045 ppb            | 1.8 %             | 50.000 ppb             |
| 64Zn (KED)  | 49.319 ppb            | 1.0 %             | 50.000 ppb             |
| 69Ga (KED)  | 49.727 ppb            | 0.3 %             | 50.000 ppb             |
| 75As (KED)  | 49.990 ppb            | 1.6 %             | 50.000 ppb             |
| 80Se (KED)  | 50.094 ppb            | 0.8 %             | 50.000 ppb             |
| 85Rb (KED)  | 49.566 ppb            | 0.5 %             | 50.000 ppb             |
| 88Sr (KED)  | 49.187 ppb            | 0.7 %             | 50.000 ppb             |
| 107Ag (KED) | 50.084 ppb            | 1.1 %             | 50.000 ppb             |
| 114Cd (KED) | 49.850 ppb            | 0.7 %             | 50.000 ppb             |
| 133Cs (KED) | 49.370 ppb            | 1.2 %             | 50.000 ppb             |
| 138Ba (KED) | 49.586 ppb            | 1.9 %             | 50.000 ppb             |
| 139La (KED) | 50.623 ppb            | 1.2 %             | 50.000 ppb             |
| 140Ce (KED) | 49.973 ppb            | 0.9 %             | 50.000 ppb             |
| 141Pr (KED) | 49.867 ppb            | 1.2 %             | 50.000 ppb             |
| 142Nd (KED) | 50.795 ppb            | 0.9 %             | 50.000 ppb             |
| 152Sm (KED) | 51.232 ppb            | 0.5 %             | 50.000 ppb             |
| 153Eu (KED) | 49.276 ppb            | 1.6 %             | 50.000 ppb             |
| 158Gd (KED) | 50.884 ppb            | 0.3 %             | 50.000 ppb             |
| 164Dy (KED) | 50.630 ppb            | 2.0 %             | 50.000 ppb             |
| 165Ho (KED) | 49.978 ppb            | 1.4 %             | 50.000 ppb             |
| 166Er (KED) | 50.510 ppb            | 0.4 %             | 50.000 ppb             |
| 169Tm (KED) | 49.689 ppb            | 1.9 %             | 50.000 ppb             |
| 174Yb (KED) | 49.687 ppb            | 1.6 %             | 50.000 ppb             |
| 175Lu (KED) | 49.849 ppb            | 1.4 %             | 50.000 ppb             |
| 205Tl (KED) | 50.012 ppb            | 0.8 %             | 50.000 ppb             |
| 208Pb (KED) | 50.533 ppb            | 1.1 %             | 50.000 ppb             |
| 232Th (KED) | 49.870 ppb            | 2.5 %             | 50.000 ppb             |
| 238U (KED)  | 49.115 ppb            | 0.7 %             | 50.000 ppb             |

**Standards:**

Analysis Index: 5  
 Analysis Name: std3  
 Analysis Type: STD  
 Analysis Started at: 9/1/2021 4:01:34 PM  
 Standard (Stock): std3  
 Standard DF: 1

| Category    | Concentration average | Concentration RSD | Standard Concentration |
|-------------|-----------------------|-------------------|------------------------|
| 9Be (KED)   | 99.270 ppb            | 1.4 %             | 100.000 ppb            |
| 11B (KED)   | 97.919 ppb            | 0.8 %             | 100.000 ppb            |
| 24Mg (KED)  | 99.782 ppb            | 1.9 %             | 100.000 ppb            |
| 27Al (KED)  | 100.222 ppb           | 1.1 %             | 100.000 ppb            |
| 51V (KED)   | 99.907 ppb            | 0.7 %             | 100.000 ppb            |
| 52Cr (KED)  | 99.892 ppb            | 0.5 %             | 100.000 ppb            |
| 55Mn (KED)  | 99.819 ppb            | 0.3 %             | 100.000 ppb            |
| 56Fe (KED)  | 99.661 ppb            | 1.2 %             | 100.000 ppb            |
| 58Ni (KED)  | 100.058 ppb           | 0.8 %             | 100.000 ppb            |
| 59Co (KED)  | 99.689 ppb            | 1.6 %             | 100.000 ppb            |
| 63Cu (KED)  | 99.798 ppb            | 0.4 %             | 100.000 ppb            |
| 64Zn (KED)  | 100.053 ppb           | 0.6 %             | 100.000 ppb            |
| 69Ga (KED)  | 100.093 ppb           | 0.3 %             | 100.000 ppb            |
| 75As (KED)  | 99.543 ppb            | 1.1 %             | 100.000 ppb            |
| 80Se (KED)  | 99.446 ppb            | 2.3 %             | 100.000 ppb            |
| 85Rb (KED)  | 100.239 ppb           | 0.5 %             | 100.000 ppb            |
| 88Sr (KED)  | 100.432 ppb           | 1.0 %             | 100.000 ppb            |
| 107Ag (KED) | 99.699 ppb            | 0.1 %             | 100.000 ppb            |
| 114Cd (KED) | 99.802 ppb            | 0.7 %             | 100.000 ppb            |
| 133Cs (KED) | 100.274 ppb           | 1.6 %             | 100.000 ppb            |
| 138Ba (KED) | 100.187 ppb           | 0.8 %             | 100.000 ppb            |
| 139La (KED) | 99.448 ppb            | 0.8 %             | 100.000 ppb            |
| 140Ce (KED) | 99.772 ppb            | 0.6 %             | 100.000 ppb            |
| 141Pr (KED) | 99.867 ppb            | 1.8 %             | 100.000 ppb            |
| 142Nd (KED) | 99.535 ppb            | 1.4 %             | 100.000 ppb            |
| 152Sm (KED) | 99.187 ppb            | 1.0 %             | 100.000 ppb            |
| 153Eu (KED) | 100.154 ppb           | 0.5 %             | 100.000 ppb            |
| 158Gd (KED) | 99.381 ppb            | 0.9 %             | 100.000 ppb            |
| 164Dy (KED) | 99.494 ppb            | 1.8 %             | 100.000 ppb            |
| 165Ho (KED) | 99.996 ppb            | 0.7 %             | 100.000 ppb            |
| 166Er (KED) | 99.596 ppb            | 0.4 %             | 100.000 ppb            |
| 169Tm (KED) | 100.275 ppb           | 0.9 %             | 100.000 ppb            |
| 174Yb (KED) | 99.986 ppb            | 1.0 %             | 100.000 ppb            |
| 175Lu (KED) | 100.030 ppb           | 1.2 %             | 100.000 ppb            |
| 205Tl (KED) | 99.963 ppb            | 1.3 %             | 100.000 ppb            |
| 208Pb (KED) | 99.564 ppb            | 2.2 %             | 100.000 ppb            |
| 232Th (KED) | 100.218 ppb           | 0.9 %             | 100.000 ppb            |
| 238U (KED)  | 100.635 ppb           | 1.8 %             | 100.000 ppb            |

## Sample List Summary:

Instrument ID: iCAP Q

| Index: | Label:             | Main<br>Runs: | Survey<br>Runs: | Start Time:         | User name:                    |
|--------|--------------------|---------------|-----------------|---------------------|-------------------------------|
| 1      | water              | 3             | 0               | 9/1/2021 3:47:12 PM | WINDOWS-UPCI4ER\Administrator |
| 2      | blk                | 3             | 0               | 9/1/2021 3:50:03 PM | WINDOWS-UPCI4ER\Administrator |
| 3      | std1               | 3             | 0               | 9/1/2021 3:53:47 PM | WINDOWS-UPCI4ER\Administrator |
| 4      | std2               | 3             | 0               | 9/1/2021 3:57:46 PM | WINDOWS-UPCI4ER\Administrator |
| 5      | std3               | 3             | 0               | 9/1/2021 4:01:34 PM | WINDOWS-UPCI4ER\Administrator |
| 6      | 复测                 | 3             | 0               | 9/1/2021 4:05:18 PM | WINDOWS-UPCI4ER\Administrator |
| 7      | 290jian            | 3             | 0               | 9/1/2021 4:08:57 PM | WINDOWS-UPCI4ER\Administrator |
| 8      | 179386jian         | 3             | 0               | 9/1/2021 4:12:27 PM | WINDOWS-UPCI4ER\Administrator |
| 9      | 179420jian         | 3             | 0               | 9/1/2021 4:15:44 PM | WINDOWS-UPCI4ER\Administrator |
| 10     | 179412jian         | 3             | 0               | 9/1/2021 4:19:05 PM | WINDOWS-UPCI4ER\Administrator |
| 11     | 179348jian         | 3             | 0               | 9/1/2021 4:22:20 PM | WINDOWS-UPCI4ER\Administrator |
| 12     | 179362jian         | 3             | 0               | 9/1/2021 4:25:41 PM | WINDOWS-UPCI4ER\Administrator |
| 13     | 179402jian         | 3             | 0               | 9/1/2021 4:29:00 PM | WINDOWS-UPCI4ER\Administrator |
| 14     | 179363jian         | 3             | 0               | 9/1/2021 4:32:31 PM | WINDOWS-UPCI4ER\Administrator |
| 15     | 179401jian         | 3             | 0               | 9/1/2021 4:35:35 PM | WINDOWS-UPCI4ER\Administrator |
| 16     | 179411jian         | 3             | 0               | 9/1/2021 4:38:43 PM | WINDOWS-UPCI4ER\Administrator |
| 17     | 179409jian         | 3             | 0               | 9/1/2021 4:42:01 PM | WINDOWS-UPCI4ER\Administrator |
| 18     | 634755jian         | 3             | 0               | 9/1/2021 4:45:23 PM | WINDOWS-UPCI4ER\Administrator |
| 19     | 046681(178563)jian | 3             | 0               | 9/1/2021 4:48:38 PM | WINDOWS-UPCI4ER\Administrator |
| 20     | 027918(178637)jian | 3             | 0               | 9/1/2021 4:51:50 PM | WINDOWS-UPCI4ER\Administrator |
| 21     | 046377(178684)jian | 3             | 0               | 9/1/2021 4:55:01 PM | WINDOWS-UPCI4ER\Administrator |
| 22     | 046002(178603)jian | 3             | 0               | 9/1/2021 4:58:17 PM | WINDOWS-UPCI4ER\Administrator |
| 23     | 024066(178585)jian | 3             | 0               | 9/1/2021 5:01:33 PM | WINDOWS-UPCI4ER\Administrator |
| 24     | 015366(178647)jian | 3             | 0               | 9/1/2021 5:04:50 PM | WINDOWS-UPCI4ER\Administrator |
| 25     | 04380(178516)jian  | 3             | 0               | 9/1/2021 5:07:51 PM | WINDOWS-UPCI4ER\Administrator |
| 26     | 034758(179419)jian | 3             | 0               | 9/1/2021 5:11:01 PM | WINDOWS-UPCI4ER\Administrator |

## Sample Summary

Instrument ID: iCAP Q

Analysis index: 1

Analysis name: water

Analysis started at: 9/1/2021 3:47:12 PM

User name: WINDOWS-UPCI4ER\Administrator

| Category    | Concentration average | Concentration RSD |
|-------------|-----------------------|-------------------|
| 9Be (KED)   | -0.010 ppb            | 0.0 %             |
| 11B (KED)   | -3.063 ppb            | 1.9 %             |
| 24Mg (KED)  | -1.474 ppb            | 1.2 %             |
| 27Al (KED)  | -1.079 ppb            | 1.8 %             |
| 51V (KED)   | -0.002 ppb            |                   |
| 52Cr (KED)  | -0.022 ppb            | 7.0 %             |
| 55Mn (KED)  | -0.025 ppb            | 22.5 %            |
| 56Fe (KED)  | -0.788 ppb            | 0.3 %             |
| 58Ni (KED)  | -0.093 ppb            | 9.8 %             |
| 59Co (KED)  | -0.001 ppb            | 25.0 %            |
| 63Cu (KED)  | -0.632 ppb            | 0.3 %             |
| 64Zn (KED)  | -1.903 ppb            | 0.9 %             |
| 69Ga (KED)  | -0.095 ppb            | 1.6 %             |
| 75As (KED)  | -0.017 ppb            | 66.8 %            |
| 80Se (KED)  | 0.249 ppb             | 52.1 %            |
| 85Rb (KED)  | -0.016 ppb            | 2.5 %             |
| 88Sr (KED)  | -0.036 ppb            | 1.4 %             |
| 107Ag (KED) | -0.011 ppb            | 0.7 %             |
| 114Cd (KED) | -0.026 ppb            | 1.8 %             |
| 133Cs (KED) | -0.001 ppb            | 48.0 %            |
| 138Ba (KED) | -0.362 ppb            | 0.4 %             |
| 139La (KED) | -0.001 ppb            | 3.8 %             |
| 140Ce (KED) | -0.001 ppb            | 1.2 %             |
| 141Pr (KED) | 0.000 ppb             | 0.0 %             |
| 142Nd (KED) | -0.001 ppb            | 3.8 %             |
| 152Sm (KED) | 0.000 ppb             | 0.0 %             |
| 153Eu (KED) | 0.000 ppb             | 0.0 %             |
| 158Gd (KED) | 0.000 ppb             | 0.0 %             |
| 164Dy (KED) | 0.000 ppb             | 0.0 %             |
| 165Ho (KED) | 0.000 ppb             | 0.0 %             |
| 166Er (KED) | -0.005 ppb            | 0.4 %             |
| 169Tm (KED) | 0.000 ppb             | 0.0 %             |
| 174Yb (KED) | 0.000 ppb             | 0.0 %             |
| 175Lu (KED) | 0.000 ppb             | 0.0 %             |
| 205Tl (KED) | 0.000 ppb             | 300.0 %           |
| 208Pb (KED) | -0.124 ppb            | 0.1 %             |
| 232Th (KED) | -0.004 ppb            | 0.3 %             |
| 238U (KED)  | 0.000 ppb             | 2.0 %             |

| Category   | Concentration average | Intensity average | Intensity RSD |
|------------|-----------------------|-------------------|---------------|
| 9Be (KED)  | -0.010 ppb            | 0 cps             |               |
| 11B (KED)  | -3.063 ppb            | 3 cps             | 100.0 %       |
| 24Mg (KED) | -1.474 ppb            | 62 cps            | 11.2 %        |
| 27Al (KED) | -1.079 ppb            | 1 cps             | 173.2 %       |
| 51V (KED)  | -0.002 ppb            | 0 cps             |               |
| 52Cr (KED) | -0.022 ppb            | 36 cps            | 43.3 %        |
| 55Mn (KED) | -0.025 ppb            | 116 cps           | 24.0 %        |
| 56Fe (KED) | -0.788 ppb            | 199 cps           | 10.6 %        |
| 58Ni (KED) | -0.093 ppb            | 1,781 cps         | 6.3 %         |
| 59Co (KED) | -0.001 ppb            | 3 cps             | 100.0 %       |

| Category    | Concentration average | Intensity average | Intensity RSD |
|-------------|-----------------------|-------------------|---------------|
| 63Cu (KED)  | -0.632 ppb            | 413 cps           | 6.5 %         |
| 64Zn (KED)  | -1.903 ppb            | 561 cps           | 12.6 %        |
| 69Ga (KED)  | -0.095 ppb            | 18 cps            | 43.3 %        |
| 75As (KED)  | -0.017 ppb            | 12 cps            | 103.3 %       |
| 80Se (KED)  | 0.249 ppb             | 909 cps           | 4.7 %         |
| 85Rb (KED)  | -0.016 ppb            | 2 cps             | 86.6 %        |
| 88Sr (KED)  | -0.036 ppb            | 37 cps            | 9.1 %         |
| 107Ag (KED) | -0.011 ppb            | 4 cps             | 86.6 %        |
| 114Cd (KED) | -0.026 ppb            | 10 cps            | 88.2 %        |
| 133Cs (KED) | -0.001 ppb            | 6 cps             | 124.9 %       |
| 138Ba (KED) | -0.362 ppb            | 646 cps           | 8.4 %         |
| 139La (KED) | -0.001 ppb            | 1 cps             | 173.2 %       |
| 140Ce (KED) | -0.001 ppb            | 4 cps             | 43.3 %        |
| 141Pr (KED) | 0.000 ppb             | 0 cps             |               |
| 142Nd (KED) | -0.001 ppb            | 2 cps             | 86.6 %        |
| 152Sm (KED) | 0.000 ppb             | 0 cps             |               |
| 153Eu (KED) | 0.000 ppb             | 0 cps             |               |
| 158Gd (KED) | 0.000 ppb             | 0 cps             |               |
| 164Dy (KED) | 0.000 ppb             | 0 cps             |               |
| 165Ho (KED) | 0.000 ppb             | 0 cps             |               |
| 166Er (KED) | -0.005 ppb            | 1 cps             | 173.2 %       |
| 169Tm (KED) | 0.000 ppb             | 0 cps             |               |
| 174Yb (KED) | 0.000 ppb             | 0 cps             |               |
| 175Lu (KED) | 0.000 ppb             | 0 cps             |               |
| 205Tl (KED) | 0.000 ppb             | 33 cps            | 40.0 %        |
| 208Pb (KED) | -0.124 ppb            | 286 cps           | 5.9 %         |
| 232Th (KED) | -0.004 ppb            | 4 cps             | 86.6 %        |
| 238U (KED)  | 0.000 ppb             | 3 cps             | 100.0 %       |

## Sample Summary

Instrument ID: iCAP Q

Analysis index: 2

Analysis name: blk

Analysis started at: 9/1/2021 3:50:03 PM

User name: WINDOWS-UPCI4ER\Administrator

| Category    | Concentration average | Concentration RSD |
|-------------|-----------------------|-------------------|
| 9Be (KED)   | 0.000 ppb             | 173.2 %           |
| 11B (KED)   | 0.000 ppb             | 33.7 %            |
| 24Mg (KED)  | 0.000 ppb             | 17.6 %            |
| 27Al (KED)  | 0.000 ppb             | 21.9 %            |
| 51V (KED)   | 0.000 ppb             | 88.2 %            |
| 52Cr (KED)  | 0.000 ppb             | 11.5 %            |
| 55Mn (KED)  | 0.000 ppb             | 12.2 %            |
| 56Fe (KED)  | 0.000 ppb             | 3.5 %             |
| 58Ni (KED)  | 0.000 ppb             | 2.6 %             |
| 59Co (KED)  | 0.000 ppb             | 20.0 %            |
| 63Cu (KED)  | 0.000 ppb             | 32.7 %            |
| 64Zn (KED)  | 0.000 ppb             | 5.6 %             |
| 69Ga (KED)  | 0.000 ppb             | 16.6 %            |
| 75As (KED)  | 0.000 ppb             | 6.2 %             |
| 80Se (KED)  | 0.000 ppb             | 2.5 %             |
| 85Rb (KED)  | 0.000 ppb             | 38.9 %            |
| 88Sr (KED)  | 0.000 ppb             | 22.7 %            |
| 107Ag (KED) | 0.000 ppb             | 6.0 %             |
| 114Cd (KED) | 0.000 ppb             | 10.1 %            |
| 133Cs (KED) | 0.000 ppb             | 16.7 %            |
| 138Ba (KED) | 0.000 ppb             | 12.4 %            |
| 139La (KED) | 0.000 ppb             | 22.4 %            |
| 140Ce (KED) | 0.000 ppb             | 10.4 %            |
| 141Pr (KED) | 0.000 ppb             | 22.2 %            |
| 142Nd (KED) | 0.000 ppb             | 29.5 %            |
| 152Sm (KED) | 0.000 ppb             | 48.0 %            |
| 153Eu (KED) | 0.000 ppb             | 36.5 %            |
| 158Gd (KED) | 0.000 ppb             | 56.8 %            |
| 164Dy (KED) | 0.000 ppb             | 44.6 %            |
| 165Ho (KED) | 0.000 ppb             | 33.3 %            |
| 166Er (KED) | 0.000 ppb             | 37.9 %            |
| 169Tm (KED) | 0.000 ppb             | 36.5 %            |
| 174Yb (KED) | 0.000 ppb             | 49.5 %            |
| 175Lu (KED) | 0.000 ppb             | 89.2 %            |
| 205Tl (KED) | 0.000 ppb             | 26.6 %            |
| 208Pb (KED) | 0.000 ppb             | 1.6 %             |
| 232Th (KED) | 0.000 ppb             | 7.3 %             |
| 238U (KED)  | 0.000 ppb             | 20.8 %            |

| Category   | Concentration average | Intensity average | Intensity RSD |
|------------|-----------------------|-------------------|---------------|
| 9Be (KED)  | 0.000 ppb             | 1 cps             | 173.2 %       |
| 11B (KED)  | 0.000 ppb             | 180 cps           | 33.7 %        |
| 24Mg (KED) | 0.000 ppb             | 641 cps           | 17.6 %        |
| 27Al (KED) | 0.000 ppb             | 108 cps           | 21.9 %        |
| 51V (KED)  | 0.000 ppb             | 10 cps            | 88.2 %        |
| 52Cr (KED) | 0.000 ppb             | 257 cps           | 11.5 %        |
| 55Mn (KED) | 0.000 ppb             | 239 cps           | 12.2 %        |
| 56Fe (KED) | 0.000 ppb             | 7,666 cps         | 3.5 %         |
| 58Ni (KED) | 0.000 ppb             | 2,924 cps         | 2.6 %         |
| 59Co (KED) | 0.000 ppb             | 17 cps            | 20.0 %        |

| Category    | Concentration average | Intensity average | Intensity RSD |
|-------------|-----------------------|-------------------|---------------|
| 63Cu (KED)  | 0.000 ppb             | 10,093 cps        | 32.7 %        |
| 64Zn (KED)  | 0.000 ppb             | 8,009 cps         | 5.6 %         |
| 69Ga (KED)  | 0.000 ppb             | 491 cps           | 16.6 %        |
| 75As (KED)  | 0.000 ppb             | 31 cps            | 6.2 %         |
| 80Se (KED)  | 0.000 ppb             | 827 cps           | 2.5 %         |
| 85Rb (KED)  | 0.000 ppb             | 78 cps            | 38.9 %        |
| 88Sr (KED)  | 0.000 ppb             | 280 cps           | 22.7 %        |
| 107Ag (KED) | 0.000 ppb             | 533 cps           | 6.0 %         |
| 114Cd (KED) | 0.000 ppb             | 497 cps           | 10.1 %        |
| 133Cs (KED) | 0.000 ppb             | 20 cps            | 16.7 %        |
| 138Ba (KED) | 0.000 ppb             | 15,176 cps        | 12.4 %        |
| 139La (KED) | 0.000 ppb             | 52 cps            | 22.4 %        |
| 140Ce (KED) | 0.000 ppb             | 161 cps           | 10.4 %        |
| 141Pr (KED) | 0.000 ppb             | 30 cps            | 22.2 %        |
| 142Nd (KED) | 0.000 ppb             | 52 cps            | 29.5 %        |
| 152Sm (KED) | 0.000 ppb             | 14 cps            | 48.0 %        |
| 153Eu (KED) | 0.000 ppb             | 21 cps            | 36.5 %        |
| 158Gd (KED) | 0.000 ppb             | 12 cps            | 56.8 %        |
| 164Dy (KED) | 0.000 ppb             | 16 cps            | 44.6 %        |
| 165Ho (KED) | 0.000 ppb             | 10 cps            | 33.3 %        |
| 166Er (KED) | 0.000 ppb             | 442 cps           | 37.9 %        |
| 169Tm (KED) | 0.000 ppb             | 21 cps            | 36.5 %        |
| 174Yb (KED) | 0.000 ppb             | 8 cps             | 49.5 %        |
| 175Lu (KED) | 0.000 ppb             | 8 cps             | 89.2 %        |
| 205Tl (KED) | 0.000 ppb             | 29 cps            | 26.6 %        |
| 208Pb (KED) | 0.000 ppb             | 19,737 cps        | 1.6 %         |
| 232Th (KED) | 0.000 ppb             | 1,278 cps         | 7.3 %         |
| 238U (KED)  | 0.000 ppb             | 167 cps           | 20.8 %        |

## Sample Summary

Instrument ID: iCAP Q

Analysis index: 3

Analysis name: std1

Analysis started at: 9/1/2021 3:53:47 PM

User name: WINDOWS-UPCI4ER\Administrator

| Category    | Concentration average | Concentration RSD |
|-------------|-----------------------|-------------------|
| 9Be (KED)   | 25.704 ppb            | 4.1 %             |
| 11B (KED)   | 30.656 ppb            | 2.8 %             |
| 24Mg (KED)  | 24.514 ppb            | 1.8 %             |
| 27Al (KED)  | 25.540 ppb            | 0.4 %             |
| 51V (KED)   | 25.275 ppb            | 1.7 %             |
| 52Cr (KED)  | 25.173 ppb            | 1.2 %             |
| 55Mn (KED)  | 25.167 ppb            | 1.4 %             |
| 56Fe (KED)  | 25.394 ppb            | 1.0 %             |
| 58Ni (KED)  | 25.627 ppb            | 0.2 %             |
| 59Co (KED)  | 25.600 ppb            | 0.9 %             |
| 63Cu (KED)  | 25.718 ppb            | 1.8 %             |
| 64Zn (KED)  | 26.152 ppb            | 1.1 %             |
| 69Ga (KED)  | 25.176 ppb            | 0.6 %             |
| 75As (KED)  | 26.848 ppb            | 1.2 %             |
| 80Se (KED)  | 27.027 ppb            | 1.8 %             |
| 85Rb (KED)  | 24.914 ppb            | 1.0 %             |
| 88Sr (KED)  | 24.899 ppb            | 1.7 %             |
| 107Ag (KED) | 26.038 ppb            | 2.0 %             |
| 114Cd (KED) | 26.092 ppb            | 1.2 %             |
| 133Cs (KED) | 25.163 ppb            | 0.5 %             |
| 138Ba (KED) | 25.079 ppb            | 0.8 %             |
| 139La (KED) | 25.962 ppb            | 1.9 %             |
| 140Ce (KED) | 25.964 ppb            | 1.3 %             |
| 141Pr (KED) | 25.797 ppb            | 0.9 %             |
| 142Nd (KED) | 25.269 ppb            | 2.7 %             |
| 152Sm (KED) | 25.786 ppb            | 1.8 %             |
| 153Eu (KED) | 25.834 ppb            | 1.0 %             |
| 158Gd (KED) | 25.708 ppb            | 1.9 %             |
| 164Dy (KED) | 25.765 ppb            | 1.2 %             |
| 165Ho (KED) | 25.061 ppb            | 0.8 %             |
| 166Er (KED) | 25.598 ppb            | 0.6 %             |
| 169Tm (KED) | 24.523 ppb            | 1.8 %             |
| 174Yb (KED) | 25.682 ppb            | 0.8 %             |
| 175Lu (KED) | 25.181 ppb            | 1.3 %             |
| 205Tl (KED) | 25.122 ppb            | 0.3 %             |
| 208Pb (KED) | 25.679 ppb            | 0.3 %             |
| 232Th (KED) | 24.386 ppb            | 0.4 %             |
| 238U (KED)  | 24.232 ppb            | 2.7 %             |

| Category   | Concentration average | Intensity average | Intensity RSD |
|------------|-----------------------|-------------------|---------------|
| 9Be (KED)  | 25.704 ppb            | 2,795 cps         | 4.1 %         |
| 11B (KED)  | 30.656 ppb            | 1,948 cps         | 2.5 %         |
| 24Mg (KED) | 24.514 ppb            | 10,269 cps        | 1.7 %         |
| 27Al (KED) | 25.540 ppb            | 2,633 cps         | 0.4 %         |
| 51V (KED)  | 25.275 ppb            | 165,058 cps       | 1.7 %         |
| 52Cr (KED) | 25.173 ppb            | 255,566 cps       | 1.2 %         |
| 55Mn (KED) | 25.167 ppb            | 125,244 cps       | 1.4 %         |
| 56Fe (KED) | 25.394 ppb            | 248,196 cps       | 1.0 %         |
| 58Ni (KED) | 25.627 ppb            | 317,132 cps       | 0.2 %         |
| 59Co (KED) | 25.600 ppb            | 512,382 cps       | 0.9 %         |

| Category    | Concentration average | Intensity average | Intensity RSD |
|-------------|-----------------------|-------------------|---------------|
| 63Cu (KED)  | 25.718 ppb            | 404,289 cps       | 1.7 %         |
| 64Zn (KED)  | 26.152 ppb            | 110,379 cps       | 1.0 %         |
| 69Ga (KED)  | 25.176 ppb            | 125,640 cps       | 0.6 %         |
| 75As (KED)  | 26.848 ppb            | 30,418 cps        | 1.2 %         |
| 80Se (KED)  | 27.027 ppb            | 9,767 cps         | 1.7 %         |
| 85Rb (KED)  | 24.914 ppb            | 118,522 cps       | 1.0 %         |
| 88Sr (KED)  | 24.899 ppb            | 170,664 cps       | 1.7 %         |
| 107Ag (KED) | 26.038 ppb            | 1,295,766 cps     | 2.0 %         |
| 114Cd (KED) | 26.092 ppb            | 485,191 cps       | 1.2 %         |
| 133Cs (KED) | 25.163 ppb            | 701,698 cps       | 0.5 %         |
| 138Ba (KED) | 25.079 ppb            | 1,022,557 cps     | 0.8 %         |
| 139La (KED) | 25.962 ppb            | 2,152,949 cps     | 1.9 %         |
| 140Ce (KED) | 25.964 ppb            | 2,897,418 cps     | 1.3 %         |
| 141Pr (KED) | 25.797 ppb            | 2,982,288 cps     | 0.9 %         |
| 142Nd (KED) | 25.269 ppb            | 1,210,908 cps     | 2.7 %         |
| 152Sm (KED) | 25.786 ppb            | 1,166,605 cps     | 1.8 %         |
| 153Eu (KED) | 25.834 ppb            | 2,315,144 cps     | 1.0 %         |
| 158Gd (KED) | 25.708 ppb            | 1,643,324 cps     | 1.9 %         |
| 164Dy (KED) | 25.765 ppb            | 1,841,441 cps     | 1.2 %         |
| 165Ho (KED) | 25.061 ppb            | 6,188,092 cps     | 0.8 %         |
| 166Er (KED) | 25.598 ppb            | 2,238,356 cps     | 0.6 %         |
| 169Tm (KED) | 24.523 ppb            | 7,172,938 cps     | 1.8 %         |
| 174Yb (KED) | 25.682 ppb            | 2,722,081 cps     | 0.8 %         |
| 175Lu (KED) | 25.181 ppb            | 4,249,810 cps     | 1.3 %         |
| 205Tl (KED) | 25.122 ppb            | 5,506,557 cps     | 0.3 %         |
| 208Pb (KED) | 25.679 ppb            | 4,060,725 cps     | 0.3 %         |
| 232Th (KED) | 24.386 ppb            | 7,614,117 cps     | 0.4 %         |
| 238U (KED)  | 24.232 ppb            | 8,886,699 cps     | 2.7 %         |

## Sample Summary

Instrument ID: iCAP Q

Analysis index: 4

Analysis name: std2

Analysis started at: 9/1/2021 3:57:46 PM

User name: WINDOWS-UPCI4ER\Administrator

| Category    | Concentration average | Concentration RSD |
|-------------|-----------------------|-------------------|
| 9Be (KED)   | 51.107 ppb            | 0.3 %             |
| 11B (KED)   | 51.334 ppb            | 6.6 %             |
| 24Mg (KED)  | 50.679 ppb            | 1.2 %             |
| 27Al (KED)  | 49.286 ppb            | 1.0 %             |
| 51V (KED)   | 50.049 ppb            | 2.1 %             |
| 52Cr (KED)  | 50.128 ppb            | 1.6 %             |
| 55Mn (KED)  | 50.279 ppb            | 0.6 %             |
| 56Fe (KED)  | 50.480 ppb            | 0.5 %             |
| 58Ni (KED)  | 49.571 ppb            | 1.2 %             |
| 59Co (KED)  | 50.323 ppb            | 0.8 %             |
| 63Cu (KED)  | 50.045 ppb            | 1.8 %             |
| 64Zn (KED)  | 49.319 ppb            | 1.0 %             |
| 69Ga (KED)  | 49.727 ppb            | 0.3 %             |
| 75As (KED)  | 49.990 ppb            | 1.6 %             |
| 80Se (KED)  | 50.094 ppb            | 0.8 %             |
| 85Rb (KED)  | 49.566 ppb            | 0.5 %             |
| 88Sr (KED)  | 49.187 ppb            | 0.7 %             |
| 107Ag (KED) | 50.084 ppb            | 1.1 %             |
| 114Cd (KED) | 49.850 ppb            | 0.7 %             |
| 133Cs (KED) | 49.370 ppb            | 1.2 %             |
| 138Ba (KED) | 49.586 ppb            | 1.9 %             |
| 139La (KED) | 50.623 ppb            | 1.2 %             |
| 140Ce (KED) | 49.973 ppb            | 0.9 %             |
| 141Pr (KED) | 49.867 ppb            | 1.2 %             |
| 142Nd (KED) | 50.795 ppb            | 0.9 %             |
| 152Sm (KED) | 51.232 ppb            | 0.5 %             |
| 153Eu (KED) | 49.276 ppb            | 1.6 %             |
| 158Gd (KED) | 50.884 ppb            | 0.3 %             |
| 164Dy (KED) | 50.630 ppb            | 2.0 %             |
| 165Ho (KED) | 49.978 ppb            | 1.4 %             |
| 166Er (KED) | 50.510 ppb            | 0.4 %             |
| 169Tm (KED) | 49.689 ppb            | 1.9 %             |
| 174Yb (KED) | 49.687 ppb            | 1.6 %             |
| 175Lu (KED) | 49.849 ppb            | 1.4 %             |
| 205Tl (KED) | 50.012 ppb            | 0.8 %             |
| 208Pb (KED) | 50.533 ppb            | 1.1 %             |
| 232Th (KED) | 49.870 ppb            | 2.5 %             |
| 238U (KED)  | 49.115 ppb            | 0.7 %             |

| Category   | Concentration average | Intensity average | Intensity RSD |
|------------|-----------------------|-------------------|---------------|
| 9Be (KED)  | 51.107 ppb            | 5,556 cps         | 0.3 %         |
| 11B (KED)  | 51.334 ppb            | 3,140 cps         | 6.2 %         |
| 24Mg (KED) | 50.679 ppb            | 20,545 cps        | 1.2 %         |
| 27Al (KED) | 49.286 ppb            | 4,980 cps         | 1.0 %         |
| 51V (KED)  | 50.049 ppb            | 326,845 cps       | 2.1 %         |
| 52Cr (KED) | 50.128 ppb            | 508,656 cps       | 1.6 %         |
| 55Mn (KED) | 50.279 ppb            | 249,978 cps       | 0.6 %         |
| 56Fe (KED) | 50.480 ppb            | 485,807 cps       | 0.5 %         |
| 58Ni (KED) | 49.571 ppb            | 610,701 cps       | 1.2 %         |
| 59Co (KED) | 50.323 ppb            | 1,007,173 cps     | 0.8 %         |

| Category    | Concentration average | Intensity average | Intensity RSD |
|-------------|-----------------------|-------------------|---------------|
| 63Cu (KED)  | 50.045 ppb            | 777,166 cps       | 1.8 %         |
| 64Zn (KED)  | 49.319 ppb            | 201,067 cps       | 1.0 %         |
| 69Ga (KED)  | 49.727 ppb            | 247,684 cps       | 0.3 %         |
| 75As (KED)  | 49.990 ppb            | 56,610 cps        | 1.6 %         |
| 80Se (KED)  | 50.094 ppb            | 17,398 cps        | 0.8 %         |
| 85Rb (KED)  | 49.566 ppb            | 235,714 cps       | 0.5 %         |
| 88Sr (KED)  | 49.187 ppb            | 336,872 cps       | 0.7 %         |
| 107Ag (KED) | 50.084 ppb            | 2,491,901 cps     | 1.1 %         |
| 114Cd (KED) | 49.850 ppb            | 926,529 cps       | 0.7 %         |
| 133Cs (KED) | 49.370 ppb            | 1,376,744 cps     | 1.2 %         |
| 138Ba (KED) | 49.586 ppb            | 2,006,924 cps     | 1.9 %         |
| 139La (KED) | 50.623 ppb            | 4,197,955 cps     | 1.2 %         |
| 140Ce (KED) | 49.973 ppb            | 5,576,620 cps     | 0.9 %         |
| 141Pr (KED) | 49.867 ppb            | 5,764,802 cps     | 1.2 %         |
| 142Nd (KED) | 50.795 ppb            | 2,434,123 cps     | 0.9 %         |
| 152Sm (KED) | 51.232 ppb            | 2,317,869 cps     | 0.5 %         |
| 153Eu (KED) | 49.276 ppb            | 4,415,848 cps     | 1.6 %         |
| 158Gd (KED) | 50.884 ppb            | 3,252,635 cps     | 0.3 %         |
| 164Dy (KED) | 50.630 ppb            | 3,618,527 cps     | 2.0 %         |
| 165Ho (KED) | 49.978 ppb            | 12,340,460 cps    | 1.4 %         |
| 166Er (KED) | 50.510 ppb            | 4,416,354 cps     | 0.4 %         |
| 169Tm (KED) | 49.689 ppb            | 14,533,990 cps    | 1.9 %         |
| 174Yb (KED) | 49.687 ppb            | 5,266,380 cps     | 1.6 %         |
| 175Lu (KED) | 49.849 ppb            | 8,412,959 cps     | 1.4 %         |
| 205Tl (KED) | 50.012 ppb            | 10,962,340 cps    | 0.8 %         |
| 208Pb (KED) | 50.533 ppb            | 7,971,929 cps     | 1.1 %         |
| 232Th (KED) | 49.870 ppb            | 15,569,554 cps    | 2.5 %         |
| 238U (KED)  | 49.115 ppb            | 18,012,084 cps    | 0.7 %         |

## Sample Summary

Instrument ID: iCAP Q

Analysis index: 5

Analysis name: std3

Analysis started at: 9/1/2021 4:01:34 PM

User name: WINDOWS-UPCI4ER\Administrator

| Category    | Concentration average | Concentration RSD |
|-------------|-----------------------|-------------------|
| 9Be (KED)   | 99.270 ppb            | 1.4 %             |
| 11B (KED)   | 97.919 ppb            | 0.8 %             |
| 24Mg (KED)  | 99.782 ppb            | 1.9 %             |
| 27Al (KED)  | 100.222 ppb           | 1.1 %             |
| 51V (KED)   | 99.907 ppb            | 0.7 %             |
| 52Cr (KED)  | 99.892 ppb            | 0.5 %             |
| 55Mn (KED)  | 99.819 ppb            | 0.3 %             |
| 56Fe (KED)  | 99.661 ppb            | 1.2 %             |
| 58Ni (KED)  | 100.058 ppb           | 0.8 %             |
| 59Co (KED)  | 99.689 ppb            | 1.6 %             |
| 63Cu (KED)  | 99.798 ppb            | 0.4 %             |
| 64Zn (KED)  | 100.053 ppb           | 0.6 %             |
| 69Ga (KED)  | 100.093 ppb           | 0.3 %             |
| 75As (KED)  | 99.543 ppb            | 1.1 %             |
| 80Se (KED)  | 99.446 ppb            | 2.3 %             |
| 85Rb (KED)  | 100.239 ppb           | 0.5 %             |
| 88Sr (KED)  | 100.432 ppb           | 1.0 %             |
| 107Ag (KED) | 99.699 ppb            | 0.1 %             |
| 114Cd (KED) | 99.802 ppb            | 0.7 %             |
| 133Cs (KED) | 100.274 ppb           | 1.6 %             |
| 138Ba (KED) | 100.187 ppb           | 0.8 %             |
| 139La (KED) | 99.448 ppb            | 0.8 %             |
| 140Ce (KED) | 99.772 ppb            | 0.6 %             |
| 141Pr (KED) | 99.867 ppb            | 1.8 %             |
| 142Nd (KED) | 99.535 ppb            | 1.4 %             |
| 152Sm (KED) | 99.187 ppb            | 1.0 %             |
| 153Eu (KED) | 100.154 ppb           | 0.5 %             |
| 158Gd (KED) | 99.381 ppb            | 0.9 %             |
| 164Dy (KED) | 99.494 ppb            | 1.8 %             |
| 165Ho (KED) | 99.996 ppb            | 0.7 %             |
| 166Er (KED) | 99.596 ppb            | 0.4 %             |
| 169Tm (KED) | 100.275 ppb           | 0.9 %             |
| 174Yb (KED) | 99.986 ppb            | 1.0 %             |
| 175Lu (KED) | 100.030 ppb           | 1.2 %             |
| 205Tl (KED) | 99.963 ppb            | 1.3 %             |
| 208Pb (KED) | 99.564 ppb            | 2.2 %             |
| 232Th (KED) | 100.218 ppb           | 0.9 %             |
| 238U (KED)  | 100.635 ppb           | 1.8 %             |

| Category   | Concentration average | Intensity average | Intensity RSD |
|------------|-----------------------|-------------------|---------------|
| 9Be (KED)  | 99.270 ppb            | 10,790 cps        | 1.4 %         |
| 11B (KED)  | 97.919 ppb            | 5,827 cps         | 0.8 %         |
| 24Mg (KED) | 99.782 ppb            | 39,829 cps        | 1.8 %         |
| 27Al (KED) | 100.222 ppb           | 10,015 cps        | 1.1 %         |
| 51V (KED)  | 99.907 ppb            | 652,424 cps       | 0.7 %         |
| 52Cr (KED) | 99.892 ppb            | 1,013,363 cps     | 0.5 %         |
| 55Mn (KED) | 99.819 ppb            | 496,050 cps       | 0.3 %         |
| 56Fe (KED) | 99.661 ppb            | 951,643 cps       | 1.2 %         |
| 58Ni (KED) | 100.058 ppb           | 1,229,700 cps     | 0.8 %         |
| 59Co (KED) | 99.689 ppb            | 1,995,186 cps     | 1.6 %         |

| Category    | Concentration average | Intensity average | Intensity RSD |
|-------------|-----------------------|-------------------|---------------|
| 63Cu (KED)  | 99.798 ppb            | 1,539,772 cps     | 0.4 %         |
| 64Zn (KED)  | 100.053 ppb           | 399,663 cps       | 0.6 %         |
| 69Ga (KED)  | 100.093 ppb           | 498,055 cps       | 0.3 %         |
| 75As (KED)  | 99.543 ppb            | 112,694 cps       | 1.1 %         |
| 80Se (KED)  | 99.446 ppb            | 33,723 cps        | 2.2 %         |
| 85Rb (KED)  | 100.239 ppb           | 476,615 cps       | 0.5 %         |
| 88Sr (KED)  | 100.432 ppb           | 687,537 cps       | 1.0 %         |
| 107Ag (KED) | 99.699 ppb            | 4,959,922 cps     | 0.1 %         |
| 114Cd (KED) | 99.802 ppb            | 1,854,451 cps     | 0.7 %         |
| 133Cs (KED) | 100.274 ppb           | 2,796,259 cps     | 1.6 %         |
| 138Ba (KED) | 100.187 ppb           | 4,039,477 cps     | 0.8 %         |
| 139La (KED) | 99.448 ppb            | 8,246,790 cps     | 0.8 %         |
| 140Ce (KED) | 99.772 ppb            | 11,133,677 cps    | 0.6 %         |
| 141Pr (KED) | 99.867 ppb            | 11,545,108 cps    | 1.8 %         |
| 142Nd (KED) | 99.535 ppb            | 4,769,746 cps     | 1.4 %         |
| 152Sm (KED) | 99.187 ppb            | 4,487,444 cps     | 1.0 %         |
| 153Eu (KED) | 100.154 ppb           | 8,975,298 cps     | 0.5 %         |
| 158Gd (KED) | 99.381 ppb            | 6,352,731 cps     | 0.9 %         |
| 164Dy (KED) | 99.494 ppb            | 7,110,819 cps     | 1.8 %         |
| 165Ho (KED) | 99.996 ppb            | 24,690,833 cps    | 0.7 %         |
| 166Er (KED) | 99.596 ppb            | 8,707,795 cps     | 0.4 %         |
| 169Tm (KED) | 100.275 ppb           | 29,330,305 cps    | 0.9 %         |
| 174Yb (KED) | 99.986 ppb            | 10,597,670 cps    | 1.0 %         |
| 175Lu (KED) | 100.030 ppb           | 16,881,945 cps    | 1.2 %         |
| 205Tl (KED) | 99.963 ppb            | 21,911,162 cps    | 1.3 %         |
| 208Pb (KED) | 99.564 ppb            | 15,687,752 cps    | 2.2 %         |
| 232Th (KED) | 100.218 ppb           | 31,286,980 cps    | 0.9 %         |
| 238U (KED)  | 100.635 ppb           | 36,906,001 cps    | 1.8 %         |

## Sample Summary

Instrument ID: iCAP Q

Analysis index: 6

Analysis name: 复测

Analysis started at: 9/1/2021 4:05:18 PM

User name: WINDOWS-UPCI4ER\Administrator

| Category    | Concentration average | Concentration RSD |
|-------------|-----------------------|-------------------|
| 9Be (KED)   | 0.061 ppb             | 28.9 %            |
| 11B (KED)   | 9.826 ppb             | 6.9 %             |
| 24Mg (KED)  | 906.870 ppb           | 1.8 %             |
| 27Al (KED)  | 1,223.270 ppb         | 3.3 %             |
| 51V (KED)   | 2.466 ppb             | 2.2 %             |
| 52Cr (KED)  | 8.929 ppb             | 1.5 %             |
| 55Mn (KED)  | 30.347 ppb            | 2.0 %             |
| 56Fe (KED)  | 1,345.240 ppb         | 1.0 %             |
| 58Ni (KED)  | 6.196 ppb             | 2.4 %             |
| 59Co (KED)  | 0.697 ppb             | 1.9 %             |
| 63Cu (KED)  | 7.418 ppb             | 1.2 %             |
| 64Zn (KED)  | 164.194 ppb           | 0.3 %             |
| 69Ga (KED)  | 2.322 ppb             | 4.6 %             |
| 75As (KED)  | 0.886 ppb             | 4.3 %             |
| 80Se (KED)  | 1.216 ppb             | 3.8 %             |
| 85Rb (KED)  | 4.286 ppb             | 0.8 %             |
| 88Sr (KED)  | 10.893 ppb            | 0.2 %             |
| 107Ag (KED) | 0.079 ppb             | 3.9 %             |
| 114Cd (KED) | 0.128 ppb             | 0.3 %             |
| 133Cs (KED) | 0.312 ppb             | 2.4 %             |
| 138Ba (KED) | 8.331 ppb             | 2.1 %             |
| 139La (KED) | 1.073 ppb             | 1.7 %             |
| 140Ce (KED) | 2.258 ppb             | 0.9 %             |
| 141Pr (KED) | 0.284 ppb             | 1.7 %             |
| 142Nd (KED) | 1.418 ppb             | 1.0 %             |
| 152Sm (KED) | 0.215 ppb             | 2.7 %             |
| 153Eu (KED) | 0.056 ppb             | 3.5 %             |
| 158Gd (KED) | 0.192 ppb             | 2.2 %             |
| 164Dy (KED) | 0.139 ppb             | 0.7 %             |
| 165Ho (KED) | 0.041 ppb             | 1.9 %             |
| 166Er (KED) | 0.072 ppb             | 3.0 %             |
| 169Tm (KED) | 0.025 ppb             | 2.2 %             |
| 174Yb (KED) | 0.064 ppb             | 1.6 %             |
| 175Lu (KED) | 0.025 ppb             | 2.0 %             |
| 205Tl (KED) | 0.038 ppb             | 2.5 %             |
| 208Pb (KED) | 1.416 ppb             | 2.7 %             |
| 232Th (KED) | 0.425 ppb             | 4.3 %             |
| 238U (KED)  | 0.099 ppb             | 1.0 %             |

| Category   | Concentration average | Intensity average | Intensity RSD |
|------------|-----------------------|-------------------|---------------|
| 9Be (KED)  | 0.061 ppb             | 8 cps             | 24.7 %        |
| 11B (KED)  | 9.826 ppb             | 747 cps           | 5.3 %         |
| 24Mg (KED) | 906.870 ppb           | 356,801 cps       | 1.8 %         |
| 27Al (KED) | 1,223.270 ppb         | 121,033 cps       | 3.3 %         |
| 51V (KED)  | 2.466 ppb             | 16,114 cps        | 2.2 %         |
| 52Cr (KED) | 8.929 ppb             | 90,811 cps        | 1.5 %         |
| 55Mn (KED) | 30.347 ppb            | 150,976 cps       | 2.0 %         |
| 56Fe (KED) | 1,345.240 ppb         | 12,749,581 cps    | 1.0 %         |
| 58Ni (KED) | 6.196 ppb             | 78,894 cps        | 2.3 %         |
| 59Co (KED) | 0.697 ppb             | 13,959 cps        | 1.9 %         |

| Category    | Concentration average | Intensity average | Intensity RSD |
|-------------|-----------------------|-------------------|---------------|
| 63Cu (KED)  | 7.418 ppb             | 123,796 cps       | 1.1 %         |
| 64Zn (KED)  | 164.194 ppb           | 650,742 cps       | 0.3 %         |
| 69Ga (KED)  | 2.322 ppb             | 12,036 cps        | 4.5 %         |
| 75As (KED)  | 0.886 ppb             | 1,033 cps         | 4.2 %         |
| 80Se (KED)  | 1.216 ppb             | 1,229 cps         | 1.3 %         |
| 85Rb (KED)  | 4.286 ppb             | 20,452 cps        | 0.8 %         |
| 88Sr (KED)  | 10.893 ppb            | 74,818 cps        | 0.2 %         |
| 107Ag (KED) | 0.079 ppb             | 4,462 cps         | 3.5 %         |
| 114Cd (KED) | 0.128 ppb             | 2,879 cps         | 0.3 %         |
| 133Cs (KED) | 0.312 ppb             | 8,716 cps         | 2.4 %         |
| 138Ba (KED) | 8.331 ppb             | 349,799 cps       | 2.0 %         |
| 139La (KED) | 1.073 ppb             | 89,039 cps        | 1.7 %         |
| 140Ce (KED) | 2.258 ppb             | 252,183 cps       | 0.9 %         |
| 141Pr (KED) | 0.284 ppb             | 32,837 cps        | 1.7 %         |
| 142Nd (KED) | 1.418 ppb             | 68,011 cps        | 1.0 %         |
| 152Sm (KED) | 0.215 ppb             | 9,737 cps         | 2.7 %         |
| 153Eu (KED) | 0.056 ppb             | 4,995 cps         | 3.5 %         |
| 158Gd (KED) | 0.192 ppb             | 12,264 cps        | 2.2 %         |
| 164Dy (KED) | 0.139 ppb             | 9,951 cps         | 0.7 %         |
| 165Ho (KED) | 0.041 ppb             | 10,056 cps        | 1.9 %         |
| 166Er (KED) | 0.072 ppb             | 6,771 cps         | 2.8 %         |
| 169Tm (KED) | 0.025 ppb             | 7,470 cps         | 2.2 %         |
| 174Yb (KED) | 0.064 ppb             | 6,805 cps         | 1.6 %         |
| 175Lu (KED) | 0.025 ppb             | 4,279 cps         | 2.0 %         |
| 205Tl (KED) | 0.038 ppb             | 8,281 cps         | 2.5 %         |
| 208Pb (KED) | 1.416 ppb             | 242,592 cps       | 2.4 %         |
| 232Th (KED) | 0.425 ppb             | 134,039 cps       | 4.3 %         |
| 238U (KED)  | 0.099 ppb             | 36,554 cps        | 1.0 %         |

## Sample Summary

Instrument ID: iCAP Q

Analysis index: 7

Analysis name: 290jian

Analysis started at: 9/1/2021 4:08:57 PM

User name: WINDOWS-UPCI4ER\Administrator

| Category    | Concentration average | Concentration RSD |
|-------------|-----------------------|-------------------|
| 9Be (KED)   | 0.082 ppb             | 75.0 %            |
| 11B (KED)   | 6.397 ppb             | 14.9 %            |
| 24Mg (KED)  | 1,256.898 ppb         | 3.1 %             |
| 27Al (KED)  | 1,597.661 ppb         | 3.7 %             |
| 51V (KED)   | 3.106 ppb             | 1.9 %             |
| 52Cr (KED)  | 5.547 ppb             | 2.1 %             |
| 55Mn (KED)  | 40.198 ppb            | 1.9 %             |
| 56Fe (KED)  | 1,803.571 ppb         | 0.8 %             |
| 58Ni (KED)  | 8.293 ppb             | 1.9 %             |
| 59Co (KED)  | 0.863 ppb             | 3.9 %             |
| 63Cu (KED)  | 8.752 ppb             | 3.6 %             |
| 64Zn (KED)  | 181.069 ppb           | 2.5 %             |
| 69Ga (KED)  | 3.086 ppb             | 5.5 %             |
| 75As (KED)  | 0.959 ppb             | 3.5 %             |
| 80Se (KED)  | 1.280 ppb             | 8.7 %             |
| 85Rb (KED)  | 6.965 ppb             | 1.1 %             |
| 88Sr (KED)  | 12.877 ppb            | 0.6 %             |
| 107Ag (KED) | 0.076 ppb             | 4.3 %             |
| 114Cd (KED) | 0.100 ppb             | 1.8 %             |
| 133Cs (KED) | 0.336 ppb             | 1.6 %             |
| 138Ba (KED) | 9.569 ppb             | 1.8 %             |
| 139La (KED) | 1.226 ppb             | 0.2 %             |
| 140Ce (KED) | 2.559 ppb             | 0.6 %             |
| 141Pr (KED) | 0.308 ppb             | 1.7 %             |
| 142Nd (KED) | 1.598 ppb             | 2.0 %             |
| 152Sm (KED) | 0.238 ppb             | 0.6 %             |
| 153Eu (KED) | 0.048 ppb             | 4.6 %             |
| 158Gd (KED) | 0.216 ppb             | 3.1 %             |
| 164Dy (KED) | 0.153 ppb             | 1.4 %             |
| 165Ho (KED) | 0.033 ppb             | 5.1 %             |
| 166Er (KED) | 0.075 ppb             | 5.1 %             |
| 169Tm (KED) | 0.013 ppb             | 10.3 %            |
| 174Yb (KED) | 0.064 ppb             | 2.2 %             |
| 175Lu (KED) | 0.012 ppb             | 3.0 %             |
| 205Tl (KED) | 0.023 ppb             | 2.1 %             |
| 208Pb (KED) | 1.495 ppb             | 2.5 %             |
| 232Th (KED) | 0.383 ppb             | 1.6 %             |
| 238U (KED)  | 0.094 ppb             | 1.9 %             |

| Category   | Concentration average | Intensity average | Intensity RSD |
|------------|-----------------------|-------------------|---------------|
| 9Be (KED)  | 0.082 ppb             | 10 cps            | 66.7 %        |
| 11B (KED)  | 6.397 ppb             | 549 cps           | 10.0 %        |
| 24Mg (KED) | 1,256.898 ppb         | 494,270 cps       | 3.1 %         |
| 27Al (KED) | 1,597.661 ppb         | 158,043 cps       | 3.7 %         |
| 51V (KED)  | 3.106 ppb             | 20,291 cps        | 1.9 %         |
| 52Cr (KED) | 5.547 ppb             | 56,519 cps        | 2.1 %         |
| 55Mn (KED) | 40.198 ppb            | 199,905 cps       | 1.9 %         |
| 56Fe (KED) | 1,803.571 ppb         | 17,090,830 cps    | 0.8 %         |
| 58Ni (KED) | 8.293 ppb             | 104,599 cps       | 1.8 %         |
| 59Co (KED) | 0.863 ppb             | 17,285 cps        | 3.9 %         |

| Category    | Concentration average | Intensity average | Intensity RSD |
|-------------|-----------------------|-------------------|---------------|
| 63Cu (KED)  | 8.752 ppb             | 144,247 cps       | 3.3 %         |
| 64Zn (KED)  | 181.069 ppb           | 716,798 cps       | 2.5 %         |
| 69Ga (KED)  | 3.086 ppb             | 15,831 cps        | 5.3 %         |
| 75As (KED)  | 0.959 ppb             | 1,117 cps         | 3.4 %         |
| 80Se (KED)  | 1.280 ppb             | 1,250 cps         | 2.9 %         |
| 85Rb (KED)  | 6.965 ppb             | 33,189 cps        | 1.1 %         |
| 88Sr (KED)  | 12.877 ppb            | 88,400 cps        | 0.6 %         |
| 107Ag (KED) | 0.076 ppb             | 4,294 cps         | 3.7 %         |
| 114Cd (KED) | 0.100 ppb             | 2,348 cps         | 1.4 %         |
| 133Cs (KED) | 0.336 ppb             | 9,389 cps         | 1.6 %         |
| 138Ba (KED) | 9.569 ppb             | 399,560 cps       | 1.7 %         |
| 139La (KED) | 1.226 ppb             | 101,743 cps       | 0.2 %         |
| 140Ce (KED) | 2.559 ppb             | 285,708 cps       | 0.6 %         |
| 141Pr (KED) | 0.308 ppb             | 35,612 cps        | 1.7 %         |
| 142Nd (KED) | 1.598 ppb             | 76,620 cps        | 2.0 %         |
| 152Sm (KED) | 0.238 ppb             | 10,770 cps        | 0.6 %         |
| 153Eu (KED) | 0.048 ppb             | 4,286 cps         | 4.6 %         |
| 158Gd (KED) | 0.216 ppb             | 13,834 cps        | 3.1 %         |
| 164Dy (KED) | 0.153 ppb             | 10,980 cps        | 1.4 %         |
| 165Ho (KED) | 0.033 ppb             | 8,134 cps         | 5.1 %         |
| 166Er (KED) | 0.075 ppb             | 7,033 cps         | 4.8 %         |
| 169Tm (KED) | 0.013 ppb             | 3,917 cps         | 10.3 %        |
| 174Yb (KED) | 0.064 ppb             | 6,807 cps         | 2.2 %         |
| 175Lu (KED) | 0.012 ppb             | 2,109 cps         | 3.0 %         |
| 205Tl (KED) | 0.023 ppb             | 4,998 cps         | 2.1 %         |
| 208Pb (KED) | 1.495 ppb             | 254,926 cps       | 2.3 %         |
| 232Th (KED) | 0.383 ppb             | 120,879 cps       | 1.6 %         |
| 238U (KED)  | 0.094 ppb             | 34,507 cps        | 1.8 %         |

## Sample Summary

Instrument ID: iCAP Q

Analysis index: 8

Analysis name: 179386jian

Analysis started at: 9/1/2021 4:12:27 PM

User name: WINDOWS-UPCI4ER\Administrator

| Category    | Concentration average | Concentration RSD |
|-------------|-----------------------|-------------------|
| 9Be (KED)   | 0.031 ppb             | 152.8 %           |
| 11B (KED)   | 11.175 ppb            | 8.6 %             |
| 24Mg (KED)  | 640.178 ppb           | 1.7 %             |
| 27Al (KED)  | 487.892 ppb           | 2.0 %             |
| 51V (KED)   | 0.890 ppb             | 1.7 %             |
| 52Cr (KED)  | 3.217 ppb             | 1.1 %             |
| 55Mn (KED)  | 13.100 ppb            | 0.5 %             |
| 56Fe (KED)  | 489.169 ppb           | 0.7 %             |
| 58Ni (KED)  | 2.434 ppb             | 2.0 %             |
| 59Co (KED)  | 0.330 ppb             | 3.9 %             |
| 63Cu (KED)  | 12.882 ppb            | 1.3 %             |
| 64Zn (KED)  | 191.098 ppb           | 0.7 %             |
| 69Ga (KED)  | 1.331 ppb             | 1.7 %             |
| 75As (KED)  | 0.341 ppb             | 6.2 %             |
| 80Se (KED)  | 1.377 ppb             | 7.2 %             |
| 85Rb (KED)  | 3.551 ppb             | 3.4 %             |
| 88Sr (KED)  | 11.225 ppb            | 0.8 %             |
| 107Ag (KED) | 0.042 ppb             | 4.3 %             |
| 114Cd (KED) | 0.093 ppb             | 3.3 %             |
| 133Cs (KED) | 0.082 ppb             | 5.3 %             |
| 138Ba (KED) | 3.857 ppb             | 1.0 %             |
| 139La (KED) | 0.321 ppb             | 1.9 %             |
| 140Ce (KED) | 0.658 ppb             | 1.0 %             |
| 141Pr (KED) | 0.077 ppb             | 2.4 %             |
| 142Nd (KED) | 0.395 ppb             | 1.7 %             |
| 152Sm (KED) | 0.057 ppb             | 8.4 %             |
| 153Eu (KED) | 0.013 ppb             | 7.5 %             |
| 158Gd (KED) | 0.051 ppb             | 2.8 %             |
| 164Dy (KED) | 0.033 ppb             | 6.9 %             |
| 165Ho (KED) | 0.008 ppb             | 2.2 %             |
| 166Er (KED) | 0.016 ppb             | 6.4 %             |
| 169Tm (KED) | 0.003 ppb             | 7.4 %             |
| 174Yb (KED) | 0.014 ppb             | 7.2 %             |
| 175Lu (KED) | 0.003 ppb             | 2.6 %             |
| 205Tl (KED) | 0.008 ppb             | 8.1 %             |
| 208Pb (KED) | 0.612 ppb             | 2.1 %             |
| 232Th (KED) | 0.104 ppb             | 3.5 %             |
| 238U (KED)  | 0.027 ppb             | 2.9 %             |

| Category   | Concentration average | Intensity average | Intensity RSD |
|------------|-----------------------|-------------------|---------------|
| 9Be (KED)  | 0.031 ppb             | 4 cps             | 114.6 %       |
| 11B (KED)  | 11.175 ppb            | 824 cps           | 6.7 %         |
| 24Mg (KED) | 640.178 ppb           | 252,062 cps       | 1.7 %         |
| 27Al (KED) | 487.892 ppb           | 48,338 cps        | 2.0 %         |
| 51V (KED)  | 0.890 ppb             | 5,822 cps         | 1.7 %         |
| 52Cr (KED) | 3.217 ppb             | 32,881 cps        | 1.0 %         |
| 55Mn (KED) | 13.100 ppb            | 65,306 cps        | 0.5 %         |
| 56Fe (KED) | 489.169 ppb           | 4,641,006 cps     | 0.7 %         |
| 58Ni (KED) | 2.434 ppb             | 32,770 cps        | 1.8 %         |
| 59Co (KED) | 0.330 ppb             | 6,614 cps         | 3.9 %         |

| Category    | Concentration average | Intensity average | Intensity RSD |
|-------------|-----------------------|-------------------|---------------|
| 63Cu (KED)  | 12.882 ppb            | 207,550 cps       | 1.3 %         |
| 64Zn (KED)  | 191.098 ppb           | 756,056 cps       | 0.7 %         |
| 69Ga (KED)  | 1.331 ppb             | 7,109 cps         | 1.6 %         |
| 75As (KED)  | 0.341 ppb             | 417 cps           | 5.8 %         |
| 80Se (KED)  | 1.377 ppb             | 1,282 cps         | 2.6 %         |
| 85Rb (KED)  | 3.551 ppb             | 16,957 cps        | 3.4 %         |
| 88Sr (KED)  | 11.225 ppb            | 77,095 cps        | 0.7 %         |
| 107Ag (KED) | 0.042 ppb             | 2,637 cps         | 3.4 %         |
| 114Cd (KED) | 0.093 ppb             | 2,226 cps         | 2.6 %         |
| 133Cs (KED) | 0.082 ppb             | 2,312 cps         | 5.3 %         |
| 138Ba (KED) | 3.857 ppb             | 170,099 cps       | 1.0 %         |
| 139La (KED) | 0.321 ppb             | 26,687 cps        | 1.9 %         |
| 140Ce (KED) | 0.658 ppb             | 73,638 cps        | 1.0 %         |
| 141Pr (KED) | 0.077 ppb             | 8,979 cps         | 2.4 %         |
| 142Nd (KED) | 0.395 ppb             | 18,987 cps        | 1.7 %         |
| 152Sm (KED) | 0.057 ppb             | 2,571 cps         | 8.3 %         |
| 153Eu (KED) | 0.013 ppb             | 1,154 cps         | 7.3 %         |
| 158Gd (KED) | 0.051 ppb             | 3,303 cps         | 2.7 %         |
| 164Dy (KED) | 0.033 ppb             | 2,409 cps         | 6.8 %         |
| 165Ho (KED) | 0.008 ppb             | 2,072 cps         | 2.1 %         |
| 166Er (KED) | 0.016 ppb             | 1,847 cps         | 4.8 %         |
| 169Tm (KED) | 0.003 ppb             | 1,014 cps         | 7.3 %         |
| 174Yb (KED) | 0.014 ppb             | 1,493 cps         | 7.2 %         |
| 175Lu (KED) | 0.003 ppb             | 538 cps           | 2.6 %         |
| 205Tl (KED) | 0.008 ppb             | 1,723 cps         | 8.0 %         |
| 208Pb (KED) | 0.612 ppb             | 115,973 cps       | 1.7 %         |
| 232Th (KED) | 0.104 ppb             | 33,745 cps        | 3.4 %         |
| 238U (KED)  | 0.027 ppb             | 10,016 cps        | 2.9 %         |

## Sample Summary

Instrument ID: iCAP Q

Analysis index: 9

Analysis name: 179420jian

Analysis started at: 9/1/2021 4:15:44 PM

User name: WINDOWS-UPCI4ER\Administrator

| Category    | Concentration average | Concentration RSD             |
|-------------|-----------------------|-------------------------------|
| 9Be (KED)   | 0.000 ppb             | 1,567,880,022,109,980,000.0 % |
| 11B (KED)   | 12.813 ppb            | 3.0 %                         |
| 24Mg (KED)  | 549.415 ppb           | 0.1 %                         |
| 27Al (KED)  | 339.343 ppb           | 1.2 %                         |
| 51V (KED)   | 0.615 ppb             | 2.4 %                         |
| 52Cr (KED)  | 3.991 ppb             | 2.3 %                         |
| 55Mn (KED)  | 9.169 ppb             | 1.7 %                         |
| 56Fe (KED)  | 357.665 ppb           | 1.2 %                         |
| 58Ni (KED)  | 1.838 ppb             | 2.3 %                         |
| 59Co (KED)  | 0.216 ppb             | 3.9 %                         |
| 63Cu (KED)  | 13.150 ppb            | 0.4 %                         |
| 64Zn (KED)  | 185.992 ppb           | 1.0 %                         |
| 69Ga (KED)  | 0.911 ppb             | 1.3 %                         |
| 75As (KED)  | 0.231 ppb             | 12.3 %                        |
| 80Se (KED)  | 1.135 ppb             | 8.0 %                         |
| 85Rb (KED)  | 3.690 ppb             | 1.8 %                         |
| 88Sr (KED)  | 8.473 ppb             | 1.7 %                         |
| 107Ag (KED) | 0.039 ppb             | 4.5 %                         |
| 114Cd (KED) | 0.052 ppb             | 4.4 %                         |
| 133Cs (KED) | 0.055 ppb             | 7.0 %                         |
| 138Ba (KED) | 2.516 ppb             | 1.5 %                         |
| 139La (KED) | 0.212 ppb             | 2.1 %                         |
| 140Ce (KED) | 0.428 ppb             | 0.8 %                         |
| 141Pr (KED) | 0.052 ppb             | 2.3 %                         |
| 142Nd (KED) | 0.266 ppb             | 1.8 %                         |
| 152Sm (KED) | 0.039 ppb             | 2.4 %                         |
| 153Eu (KED) | 0.008 ppb             | 5.7 %                         |
| 158Gd (KED) | 0.034 ppb             | 2.0 %                         |
| 164Dy (KED) | 0.024 ppb             | 2.5 %                         |
| 165Ho (KED) | 0.005 ppb             | 4.0 %                         |
| 166Er (KED) | 0.008 ppb             | 8.4 %                         |
| 169Tm (KED) | 0.002 ppb             | 13.1 %                        |
| 174Yb (KED) | 0.010 ppb             | 5.3 %                         |
| 175Lu (KED) | 0.001 ppb             | 17.6 %                        |
| 205Tl (KED) | 0.005 ppb             | 7.6 %                         |
| 208Pb (KED) | 0.753 ppb             | 3.6 %                         |
| 232Th (KED) | 0.071 ppb             | 2.1 %                         |
| 238U (KED)  | 0.018 ppb             | 3.9 %                         |

| Category   | Concentration average | Intensity average | Intensity RSD |
|------------|-----------------------|-------------------|---------------|
| 9Be (KED)  | 0.000 ppb             | 1 cps             | 173.2 %       |
| 11B (KED)  | 12.813 ppb            | 919 cps           | 2.4 %         |
| 24Mg (KED) | 549.415 ppb           | 216,416 cps       | 0.1 %         |
| 27Al (KED) | 339.343 ppb           | 33,653 cps        | 1.2 %         |
| 51V (KED)  | 0.615 ppb             | 4,026 cps         | 2.4 %         |
| 52Cr (KED) | 3.991 ppb             | 40,729 cps        | 2.3 %         |
| 55Mn (KED) | 9.169 ppb             | 45,784 cps        | 1.7 %         |
| 56Fe (KED) | 357.665 ppb           | 3,395,417 cps     | 1.2 %         |
| 58Ni (KED) | 1.838 ppb             | 25,459 cps        | 2.1 %         |
| 59Co (KED) | 0.216 ppb             | 4,346 cps         | 3.9 %         |

| Category    | Concentration average | Intensity average | Intensity RSD |
|-------------|-----------------------|-------------------|---------------|
| 63Cu (KED)  | 13.150 ppb            | 211,658 cps       | 0.4 %         |
| 64Zn (KED)  | 185.992 ppb           | 736,070 cps       | 1.0 %         |
| 69Ga (KED)  | 0.911 ppb             | 5,021 cps         | 1.2 %         |
| 75As (KED)  | 0.231 ppb             | 292 cps           | 11.0 %        |
| 80Se (KED)  | 1.135 ppb             | 1,202 cps         | 2.5 %         |
| 85Rb (KED)  | 3.690 ppb             | 17,622 cps        | 1.7 %         |
| 88Sr (KED)  | 8.473 ppb             | 58,264 cps        | 1.7 %         |
| 107Ag (KED) | 0.039 ppb             | 2,460 cps         | 3.5 %         |
| 114Cd (KED) | 0.052 ppb             | 1,459 cps         | 2.9 %         |
| 133Cs (KED) | 0.055 ppb             | 1,566 cps         | 6.9 %         |
| 138Ba (KED) | 2.516 ppb             | 116,244 cps       | 1.3 %         |
| 139La (KED) | 0.212 ppb             | 17,591 cps        | 2.1 %         |
| 140Ce (KED) | 0.428 ppb             | 47,917 cps        | 0.8 %         |
| 141Pr (KED) | 0.052 ppb             | 5,987 cps         | 2.3 %         |
| 142Nd (KED) | 0.266 ppb             | 12,812 cps        | 1.8 %         |
| 152Sm (KED) | 0.039 ppb             | 1,770 cps         | 2.4 %         |
| 153Eu (KED) | 0.008 ppb             | 699 cps           | 5.5 %         |
| 158Gd (KED) | 0.034 ppb             | 2,180 cps         | 2.0 %         |
| 164Dy (KED) | 0.024 ppb             | 1,750 cps         | 2.5 %         |
| 165Ho (KED) | 0.005 ppb             | 1,212 cps         | 3.9 %         |
| 166Er (KED) | 0.008 ppb             | 1,166 cps         | 5.2 %         |
| 169Tm (KED) | 0.002 ppb             | 533 cps           | 12.5 %        |
| 174Yb (KED) | 0.010 ppb             | 1,071 cps         | 5.2 %         |
| 175Lu (KED) | 0.001 ppb             | 257 cps           | 17.0 %        |
| 205Tl (KED) | 0.005 ppb             | 1,195 cps         | 7.4 %         |
| 208Pb (KED) | 0.753 ppb             | 138,201 cps       | 3.1 %         |
| 232Th (KED) | 0.071 ppb             | 23,561 cps        | 2.0 %         |
| 238U (KED)  | 0.018 ppb             | 6,934 cps         | 3.8 %         |

## Sample Summary

Instrument ID: iCAP Q

Analysis index: 10

Analysis name: 179412jian

Analysis started at: 9/1/2021 4:19:05 PM

User name: WINDOWS-UPCI4ER\Administrator

| Category    | Concentration average | Concentration RSD |
|-------------|-----------------------|-------------------|
| 9Be (KED)   | 0.020 ppb             | 150.0 %           |
| 11B (KED)   | 3.699 ppb             | 18.0 %            |
| 24Mg (KED)  | 910.638 ppb           | 0.7 %             |
| 27Al (KED)  | 778.177 ppb           | 1.0 %             |
| 51V (KED)   | 1.422 ppb             | 1.2 %             |
| 52Cr (KED)  | 3.996 ppb             | 1.7 %             |
| 55Mn (KED)  | 21.217 ppb            | 1.0 %             |
| 56Fe (KED)  | 784.768 ppb           | 0.5 %             |
| 58Ni (KED)  | 3.859 ppb             | 1.4 %             |
| 59Co (KED)  | 0.397 ppb             | 2.8 %             |
| 63Cu (KED)  | 14.390 ppb            | 1.0 %             |
| 64Zn (KED)  | 185.355 ppb           | 0.5 %             |
| 69Ga (KED)  | 1.998 ppb             | 4.6 %             |
| 75As (KED)  | 0.569 ppb             | 9.2 %             |
| 80Se (KED)  | 1.008 ppb             | 12.2 %            |
| 85Rb (KED)  | 4.002 ppb             | 1.5 %             |
| 88Sr (KED)  | 14.892 ppb            | 0.5 %             |
| 107Ag (KED) | 0.031 ppb             | 3.5 %             |
| 114Cd (KED) | 0.039 ppb             | 12.3 %            |
| 133Cs (KED) | 0.120 ppb             | 1.0 %             |
| 138Ba (KED) | 5.426 ppb             | 1.0 %             |
| 139La (KED) | 0.554 ppb             | 0.9 %             |
| 140Ce (KED) | 1.108 ppb             | 1.5 %             |
| 141Pr (KED) | 0.129 ppb             | 1.7 %             |
| 142Nd (KED) | 0.693 ppb             | 0.2 %             |
| 152Sm (KED) | 0.091 ppb             | 4.1 %             |
| 153Eu (KED) | 0.018 ppb             | 4.3 %             |
| 158Gd (KED) | 0.080 ppb             | 0.8 %             |
| 164Dy (KED) | 0.054 ppb             | 2.5 %             |
| 165Ho (KED) | 0.010 ppb             | 2.0 %             |
| 166Er (KED) | 0.022 ppb             | 6.8 %             |
| 169Tm (KED) | 0.004 ppb             | 3.6 %             |
| 174Yb (KED) | 0.023 ppb             | 3.4 %             |
| 175Lu (KED) | 0.003 ppb             | 13.0 %            |
| 205Tl (KED) | 0.008 ppb             | 6.5 %             |
| 208Pb (KED) | 1.588 ppb             | 1.0 %             |
| 232Th (KED) | 0.146 ppb             | 0.5 %             |
| 238U (KED)  | 0.039 ppb             | 3.4 %             |

| Category   | Concentration average | Intensity average | Intensity RSD |
|------------|-----------------------|-------------------|---------------|
| 9Be (KED)  | 0.020 ppb             | 3 cps             | 100.0 %       |
| 11B (KED)  | 3.699 ppb             | 393 cps           | 9.8 %         |
| 24Mg (KED) | 910.638 ppb           | 358,281 cps       | 0.7 %         |
| 27Al (KED) | 778.177 ppb           | 77,034 cps        | 1.0 %         |
| 51V (KED)  | 1.422 ppb             | 9,298 cps         | 1.1 %         |
| 52Cr (KED) | 3.996 ppb             | 40,782 cps        | 1.7 %         |
| 55Mn (KED) | 21.217 ppb            | 105,624 cps       | 1.0 %         |
| 56Fe (KED) | 784.768 ppb           | 7,440,872 cps     | 0.5 %         |
| 58Ni (KED) | 3.859 ppb             | 50,237 cps        | 1.3 %         |
| 59Co (KED) | 0.397 ppb             | 7,963 cps         | 2.8 %         |

| Category    | Concentration average | Intensity average | Intensity RSD |
|-------------|-----------------------|-------------------|---------------|
| 63Cu (KED)  | 14.390 ppb            | 230,654 cps       | 1.0 %         |
| 64Zn (KED)  | 185.355 ppb           | 733,575 cps       | 0.5 %         |
| 69Ga (KED)  | 1.998 ppb             | 10,424 cps        | 4.4 %         |
| 75As (KED)  | 0.569 ppb             | 676 cps           | 8.8 %         |
| 80Se (KED)  | 1.008 ppb             | 1,160 cps         | 3.5 %         |
| 85Rb (KED)  | 4.002 ppb             | 19,105 cps        | 1.5 %         |
| 88Sr (KED)  | 14.892 ppb            | 102,186 cps       | 0.5 %         |
| 107Ag (KED) | 0.031 ppb             | 2,097 cps         | 2.6 %         |
| 114Cd (KED) | 0.039 ppb             | 1,219 cps         | 7.3 %         |
| 133Cs (KED) | 0.120 ppb             | 3,370 cps         | 1.0 %         |
| 138Ba (KED) | 5.426 ppb             | 233,117 cps       | 0.9 %         |
| 139La (KED) | 0.554 ppb             | 45,964 cps        | 0.9 %         |
| 140Ce (KED) | 1.108 ppb             | 123,758 cps       | 1.5 %         |
| 141Pr (KED) | 0.129 ppb             | 14,952 cps        | 1.7 %         |
| 142Nd (KED) | 0.693 ppb             | 33,243 cps        | 0.2 %         |
| 152Sm (KED) | 0.091 ppb             | 4,142 cps         | 4.1 %         |
| 153Eu (KED) | 0.018 ppb             | 1,658 cps         | 4.2 %         |
| 158Gd (KED) | 0.080 ppb             | 5,153 cps         | 0.8 %         |
| 164Dy (KED) | 0.054 ppb             | 3,900 cps         | 2.5 %         |
| 165Ho (KED) | 0.010 ppb             | 2,590 cps         | 2.0 %         |
| 166Er (KED) | 0.022 ppb             | 2,372 cps         | 5.6 %         |
| 169Tm (KED) | 0.004 ppb             | 1,048 cps         | 3.5 %         |
| 174Yb (KED) | 0.023 ppb             | 2,395 cps         | 3.4 %         |
| 175Lu (KED) | 0.003 ppb             | 510 cps           | 12.8 %        |
| 205Tl (KED) | 0.008 ppb             | 1,799 cps         | 6.4 %         |
| 208Pb (KED) | 1.588 ppb             | 269,618 cps       | 0.9 %         |
| 232Th (KED) | 0.146 ppb             | 46,906 cps        | 0.5 %         |
| 238U (KED)  | 0.039 ppb             | 14,579 cps        | 3.4 %         |

## Sample Summary

Instrument ID: iCAP Q

Analysis index: 11

Analysis name: 179348jian

Analysis started at: 9/1/2021 4:22:20 PM

User name: WINDOWS-UPCI4ER\Administrator

| Category    | Concentration average | Concentration RSD |
|-------------|-----------------------|-------------------|
| 9Be (KED)   | 0.051 ppb             | 120.0 %           |
| 11B (KED)   | 3.661 ppb             | 23.8 %            |
| 24Mg (KED)  | 858.552 ppb           | 0.6 %             |
| 27Al (KED)  | 792.054 ppb           | 1.4 %             |
| 51V (KED)   | 1.389 ppb             | 2.8 %             |
| 52Cr (KED)  | 5.001 ppb             | 1.2 %             |
| 55Mn (KED)  | 21.235 ppb            | 1.7 %             |
| 56Fe (KED)  | 803.544 ppb           | 1.4 %             |
| 58Ni (KED)  | 3.721 ppb             | 1.6 %             |
| 59Co (KED)  | 0.422 ppb             | 0.5 %             |
| 63Cu (KED)  | 16.304 ppb            | 1.3 %             |
| 64Zn (KED)  | 179.011 ppb           | 1.3 %             |
| 69Ga (KED)  | 1.991 ppb             | 2.3 %             |
| 75As (KED)  | 0.404 ppb             | 9.6 %             |
| 80Se (KED)  | 1.364 ppb             | 19.2 %            |
| 85Rb (KED)  | 3.650 ppb             | 1.6 %             |
| 88Sr (KED)  | 14.369 ppb            | 1.7 %             |
| 107Ag (KED) | 0.069 ppb             | 1.0 %             |
| 114Cd (KED) | 0.083 ppb             | 10.3 %            |
| 133Cs (KED) | 0.122 ppb             | 1.8 %             |
| 138Ba (KED) | 5.425 ppb             | 2.4 %             |
| 139La (KED) | 0.478 ppb             | 0.9 %             |
| 140Ce (KED) | 0.963 ppb             | 2.4 %             |
| 141Pr (KED) | 0.118 ppb             | 3.2 %             |
| 142Nd (KED) | 0.602 ppb             | 0.7 %             |
| 152Sm (KED) | 0.087 ppb             | 1.6 %             |
| 153Eu (KED) | 0.017 ppb             | 8.0 %             |
| 158Gd (KED) | 0.082 ppb             | 1.7 %             |
| 164Dy (KED) | 0.054 ppb             | 0.8 %             |
| 165Ho (KED) | 0.010 ppb             | 9.1 %             |
| 166Er (KED) | 0.024 ppb             | 8.9 %             |
| 169Tm (KED) | 0.004 ppb             | 1.4 %             |
| 174Yb (KED) | 0.022 ppb             | 2.2 %             |
| 175Lu (KED) | 0.003 ppb             | 18.4 %            |
| 205Tl (KED) | 0.008 ppb             | 4.6 %             |
| 208Pb (KED) | 1.014 ppb             | 2.2 %             |
| 232Th (KED) | 0.134 ppb             | 0.8 %             |
| 238U (KED)  | 0.042 ppb             | 2.7 %             |

| Category   | Concentration average | Intensity average | Intensity RSD |
|------------|-----------------------|-------------------|---------------|
| 9Be (KED)  | 0.051 ppb             | 7 cps             | 100.0 %       |
| 11B (KED)  | 3.661 ppb             | 391 cps           | 12.8 %        |
| 24Mg (KED) | 858.552 ppb           | 337,825 cps       | 0.6 %         |
| 27Al (KED) | 792.054 ppb           | 78,405 cps        | 1.4 %         |
| 51V (KED)  | 1.389 ppb             | 9,078 cps         | 2.8 %         |
| 52Cr (KED) | 5.001 ppb             | 50,979 cps        | 1.2 %         |
| 55Mn (KED) | 21.235 ppb            | 105,715 cps       | 1.6 %         |
| 56Fe (KED) | 803.544 ppb           | 7,618,720 cps     | 1.4 %         |
| 58Ni (KED) | 3.721 ppb             | 48,549 cps        | 1.5 %         |
| 59Co (KED) | 0.422 ppb             | 8,455 cps         | 0.5 %         |

| Category    | Concentration average | Intensity average | Intensity RSD |
|-------------|-----------------------|-------------------|---------------|
| 63Cu (KED)  | 16.304 ppb            | 260,001 cps       | 1.2 %         |
| 64Zn (KED)  | 179.011 ppb           | 708,743 cps       | 1.3 %         |
| 69Ga (KED)  | 1.991 ppb             | 10,387 cps        | 2.2 %         |
| 75As (KED)  | 0.404 ppb             | 489 cps           | 9.0 %         |
| 80Se (KED)  | 1.364 ppb             | 1,278 cps         | 6.8 %         |
| 85Rb (KED)  | 3.650 ppb             | 17,432 cps        | 1.6 %         |
| 88Sr (KED)  | 14.369 ppb            | 98,608 cps        | 1.7 %         |
| 107Ag (KED) | 0.069 ppb             | 3,950 cps         | 0.9 %         |
| 114Cd (KED) | 0.083 ppb             | 2,031 cps         | 7.8 %         |
| 133Cs (KED) | 0.122 ppb             | 3,425 cps         | 1.8 %         |
| 138Ba (KED) | 5.425 ppb             | 233,096 cps       | 2.2 %         |
| 139La (KED) | 0.478 ppb             | 39,695 cps        | 0.9 %         |
| 140Ce (KED) | 0.963 ppb             | 107,666 cps       | 2.4 %         |
| 141Pr (KED) | 0.118 ppb             | 13,694 cps        | 3.2 %         |
| 142Nd (KED) | 0.602 ppb             | 28,913 cps        | 0.7 %         |
| 152Sm (KED) | 0.087 ppb             | 3,960 cps         | 1.6 %         |
| 153Eu (KED) | 0.017 ppb             | 1,565 cps         | 7.9 %         |
| 158Gd (KED) | 0.082 ppb             | 5,262 cps         | 1.7 %         |
| 164Dy (KED) | 0.054 ppb             | 3,846 cps         | 0.8 %         |
| 165Ho (KED) | 0.010 ppb             | 2,581 cps         | 9.0 %         |
| 166Er (KED) | 0.024 ppb             | 2,500 cps         | 7.3 %         |
| 169Tm (KED) | 0.004 ppb             | 1,104 cps         | 1.4 %         |
| 174Yb (KED) | 0.022 ppb             | 2,308 cps         | 2.2 %         |
| 175Lu (KED) | 0.003 ppb             | 517 cps           | 18.2 %        |
| 205Tl (KED) | 0.008 ppb             | 1,765 cps         | 4.5 %         |
| 208Pb (KED) | 1.014 ppb             | 179,257 cps       | 2.0 %         |
| 232Th (KED) | 0.134 ppb             | 43,036 cps        | 0.7 %         |
| 238U (KED)  | 0.042 ppb             | 15,467 cps        | 2.7 %         |

## Sample Summary

Instrument ID: iCAP Q

Analysis index: 12

Analysis name: 179362jian

Analysis started at: 9/1/2021 4:25:41 PM

User name: WINDOWS-UPCI4ER\Administrator

| Category    | Concentration average | Concentration RSD |
|-------------|-----------------------|-------------------|
| 9Be (KED)   | 0.020 ppb             | 150.0 %           |
| 11B (KED)   | 1.214 ppb             | 107.9 %           |
| 24Mg (KED)  | 698.736 ppb           | 0.8 %             |
| 27Al (KED)  | 616.296 ppb           | 1.5 %             |
| 51V (KED)   | 1.080 ppb             | 1.1 %             |
| 52Cr (KED)  | 3.501 ppb             | 0.5 %             |
| 55Mn (KED)  | 15.806 ppb            | 1.2 %             |
| 56Fe (KED)  | 602.070 ppb           | 0.8 %             |
| 58Ni (KED)  | 2.863 ppb             | 2.1 %             |
| 59Co (KED)  | 0.306 ppb             | 2.2 %             |
| 63Cu (KED)  | 14.201 ppb            | 0.3 %             |
| 64Zn (KED)  | 183.550 ppb           | 0.5 %             |
| 69Ga (KED)  | 1.535 ppb             | 1.4 %             |
| 75As (KED)  | 0.406 ppb             | 10.9 %            |
| 80Se (KED)  | 1.092 ppb             | 8.4 %             |
| 85Rb (KED)  | 2.556 ppb             | 1.8 %             |
| 88Sr (KED)  | 11.171 ppb            | 2.0 %             |
| 107Ag (KED) | 0.036 ppb             | 3.0 %             |
| 114Cd (KED) | 0.046 ppb             | 8.6 %             |
| 133Cs (KED) | 0.096 ppb             | 6.5 %             |
| 138Ba (KED) | 4.181 ppb             | 1.8 %             |
| 139La (KED) | 0.372 ppb             | 1.5 %             |
| 140Ce (KED) | 0.759 ppb             | 3.4 %             |
| 141Pr (KED) | 0.089 ppb             | 3.7 %             |
| 142Nd (KED) | 0.462 ppb             | 2.3 %             |
| 152Sm (KED) | 0.064 ppb             | 5.1 %             |
| 153Eu (KED) | 0.013 ppb             | 5.8 %             |
| 158Gd (KED) | 0.057 ppb             | 5.3 %             |
| 164Dy (KED) | 0.041 ppb             | 1.4 %             |
| 165Ho (KED) | 0.008 ppb             | 8.1 %             |
| 166Er (KED) | 0.016 ppb             | 7.7 %             |
| 169Tm (KED) | 0.003 ppb             | 3.5 %             |
| 174Yb (KED) | 0.016 ppb             | 4.9 %             |
| 175Lu (KED) | 0.002 ppb             | 12.6 %            |
| 205Tl (KED) | 0.007 ppb             | 2.0 %             |
| 208Pb (KED) | 0.639 ppb             | 2.5 %             |
| 232Th (KED) | 0.100 ppb             | 0.9 %             |
| 238U (KED)  | 0.028 ppb             | 3.2 %             |

| Category   | Concentration average | Intensity average | Intensity RSD |
|------------|-----------------------|-------------------|---------------|
| 9Be (KED)  | 0.020 ppb             | 3 cps             | 100.0 %       |
| 11B (KED)  | 1.214 ppb             | 250 cps           | 30.2 %        |
| 24Mg (KED) | 698.736 ppb           | 275,060 cps       | 0.8 %         |
| 27Al (KED) | 616.296 ppb           | 61,031 cps        | 1.5 %         |
| 51V (KED)  | 1.080 ppb             | 7,063 cps         | 1.1 %         |
| 52Cr (KED) | 3.501 ppb             | 35,762 cps        | 0.5 %         |
| 55Mn (KED) | 15.806 ppb            | 78,748 cps        | 1.2 %         |
| 56Fe (KED) | 602.070 ppb           | 5,710,386 cps     | 0.8 %         |
| 58Ni (KED) | 2.863 ppb             | 38,021 cps        | 1.9 %         |
| 59Co (KED) | 0.306 ppb             | 6,139 cps         | 2.2 %         |

| Category    | Concentration average | Intensity average | Intensity RSD |
|-------------|-----------------------|-------------------|---------------|
| 63Cu (KED)  | 14.201 ppb            | 227,768 cps       | 0.3 %         |
| 64Zn (KED)  | 183.550 ppb           | 726,510 cps       | 0.5 %         |
| 69Ga (KED)  | 1.535 ppb             | 8,122 cps         | 1.3 %         |
| 75As (KED)  | 0.406 ppb             | 491 cps           | 10.2 %        |
| 80Se (KED)  | 1.092 ppb             | 1,188 cps         | 2.5 %         |
| 85Rb (KED)  | 2.556 ppb             | 12,229 cps        | 1.8 %         |
| 88Sr (KED)  | 11.171 ppb            | 76,723 cps        | 2.0 %         |
| 107Ag (KED) | 0.036 ppb             | 2,307 cps         | 2.3 %         |
| 114Cd (KED) | 0.046 ppb             | 1,356 cps         | 5.4 %         |
| 133Cs (KED) | 0.096 ppb             | 2,706 cps         | 6.4 %         |
| 138Ba (KED) | 4.181 ppb             | 183,108 cps       | 1.7 %         |
| 139La (KED) | 0.372 ppb             | 30,902 cps        | 1.5 %         |
| 140Ce (KED) | 0.759 ppb             | 84,832 cps        | 3.4 %         |
| 141Pr (KED) | 0.089 ppb             | 10,292 cps        | 3.7 %         |
| 142Nd (KED) | 0.462 ppb             | 22,196 cps        | 2.3 %         |
| 152Sm (KED) | 0.064 ppb             | 2,894 cps         | 5.1 %         |
| 153Eu (KED) | 0.013 ppb             | 1,144 cps         | 5.7 %         |
| 158Gd (KED) | 0.057 ppb             | 3,652 cps         | 5.3 %         |
| 164Dy (KED) | 0.041 ppb             | 2,911 cps         | 1.4 %         |
| 165Ho (KED) | 0.008 ppb             | 1,979 cps         | 8.1 %         |
| 166Er (KED) | 0.016 ppb             | 1,812 cps         | 5.8 %         |
| 169Tm (KED) | 0.003 ppb             | 838 cps           | 3.4 %         |
| 174Yb (KED) | 0.016 ppb             | 1,678 cps         | 4.9 %         |
| 175Lu (KED) | 0.002 ppb             | 362 cps           | 12.4 %        |
| 205Tl (KED) | 0.007 ppb             | 1,586 cps         | 2.0 %         |
| 208Pb (KED) | 0.639 ppb             | 120,364 cps       | 2.0 %         |
| 232Th (KED) | 0.100 ppb             | 32,596 cps        | 0.8 %         |
| 238U (KED)  | 0.028 ppb             | 10,524 cps        | 3.1 %         |

## Sample Summary

Instrument ID: iCAP Q

Analysis index: 13

Analysis name: 179402jian

Analysis started at: 9/1/2021 4:29:00 PM

User name: WINDOWS-UPCI4ER\Administrator

| Category    | Concentration average | Concentration RSD |
|-------------|-----------------------|-------------------|
| 9Be (KED)   | 0.020 ppb             | 150.0 %           |
| 11B (KED)   | 3.969 ppb             | 11.7 %            |
| 24Mg (KED)  | 297.238 ppb           | 2.1 %             |
| 27Al (KED)  | 212.829 ppb           | 1.5 %             |
| 51V (KED)   | 0.372 ppb             | 2.5 %             |
| 52Cr (KED)  | 3.056 ppb             | 1.2 %             |
| 55Mn (KED)  | 5.200 ppb             | 1.4 %             |
| 56Fe (KED)  | 217.899 ppb           | 0.8 %             |
| 58Ni (KED)  | 1.206 ppb             | 2.3 %             |
| 59Co (KED)  | 0.184 ppb             | 5.1 %             |
| 63Cu (KED)  | 13.790 ppb            | 2.1 %             |
| 64Zn (KED)  | 188.871 ppb           | 1.0 %             |
| 69Ga (KED)  | 0.511 ppb             | 2.8 %             |
| 75As (KED)  | 0.195 ppb             | 12.8 %            |
| 80Se (KED)  | 1.317 ppb             | 10.2 %            |
| 85Rb (KED)  | 1.950 ppb             | 0.5 %             |
| 88Sr (KED)  | 4.487 ppb             | 0.5 %             |
| 107Ag (KED) | 0.048 ppb             | 3.0 %             |
| 114Cd (KED) | 0.121 ppb             | 2.3 %             |
| 133Cs (KED) | 0.031 ppb             | 6.3 %             |
| 138Ba (KED) | 1.387 ppb             | 2.0 %             |
| 139La (KED) | 0.118 ppb             | 1.9 %             |
| 140Ce (KED) | 0.249 ppb             | 2.0 %             |
| 141Pr (KED) | 0.029 ppb             | 1.9 %             |
| 142Nd (KED) | 0.161 ppb             | 1.6 %             |
| 152Sm (KED) | 0.022 ppb             | 6.9 %             |
| 153Eu (KED) | 0.004 ppb             | 6.6 %             |
| 158Gd (KED) | 0.019 ppb             | 4.8 %             |
| 164Dy (KED) | 0.014 ppb             | 5.0 %             |
| 165Ho (KED) | 0.003 ppb             | 8.1 %             |
| 166Er (KED) | 0.003 ppb             | 17.1 %            |
| 169Tm (KED) | 0.001 ppb             | 14.3 %            |
| 174Yb (KED) | 0.006 ppb             | 16.3 %            |
| 175Lu (KED) | 0.001 ppb             | 24.3 %            |
| 205Tl (KED) | 0.003 ppb             | 8.8 %             |
| 208Pb (KED) | 0.357 ppb             | 2.0 %             |
| 232Th (KED) | 0.035 ppb             | 5.2 %             |
| 238U (KED)  | 0.013 ppb             | 2.6 %             |

| Category   | Concentration average | Intensity average | Intensity RSD |
|------------|-----------------------|-------------------|---------------|
| 9Be (KED)  | 0.020 ppb             | 3 cps             | 100.0 %       |
| 11B (KED)  | 3.969 ppb             | 409 cps           | 6.5 %         |
| 24Mg (KED) | 297.238 ppb           | 117,377 cps       | 2.0 %         |
| 27Al (KED) | 212.829 ppb           | 21,147 cps        | 1.4 %         |
| 51V (KED)  | 0.372 ppb             | 2,442 cps         | 2.5 %         |
| 52Cr (KED) | 3.056 ppb             | 31,254 cps        | 1.2 %         |
| 55Mn (KED) | 5.200 ppb             | 26,067 cps        | 1.3 %         |
| 56Fe (KED) | 217.899 ppb           | 2,071,576 cps     | 0.8 %         |
| 58Ni (KED) | 1.206 ppb             | 17,713 cps        | 2.0 %         |
| 59Co (KED) | 0.184 ppb             | 3,693 cps         | 5.1 %         |

| Category    | Concentration average | Intensity average | Intensity RSD |
|-------------|-----------------------|-------------------|---------------|
| 63Cu (KED)  | 13.790 ppb            | 221,458 cps       | 2.0 %         |
| 64Zn (KED)  | 188.871 ppb           | 747,338 cps       | 1.0 %         |
| 69Ga (KED)  | 0.511 ppb             | 3,034 cps         | 2.4 %         |
| 75As (KED)  | 0.195 ppb             | 252 cps           | 11.2 %        |
| 80Se (KED)  | 1.317 ppb             | 1,262 cps         | 3.5 %         |
| 85Rb (KED)  | 1.950 ppb             | 9,349 cps         | 0.5 %         |
| 88Sr (KED)  | 4.487 ppb             | 30,984 cps        | 0.5 %         |
| 107Ag (KED) | 0.048 ppb             | 2,925 cps         | 2.5 %         |
| 114Cd (KED) | 0.121 ppb             | 2,738 cps         | 1.8 %         |
| 133Cs (KED) | 0.031 ppb             | 882 cps           | 6.1 %         |
| 138Ba (KED) | 1.387 ppb             | 70,882 cps        | 1.6 %         |
| 139La (KED) | 0.118 ppb             | 9,815 cps         | 1.9 %         |
| 140Ce (KED) | 0.249 ppb             | 27,941 cps        | 2.0 %         |
| 141Pr (KED) | 0.029 ppb             | 3,369 cps         | 1.8 %         |
| 142Nd (KED) | 0.161 ppb             | 7,775 cps         | 1.6 %         |
| 152Sm (KED) | 0.022 ppb             | 1,011 cps         | 6.8 %         |
| 153Eu (KED) | 0.004 ppb             | 406 cps           | 6.2 %         |
| 158Gd (KED) | 0.019 ppb             | 1,230 cps         | 4.7 %         |
| 164Dy (KED) | 0.014 ppb             | 1,048 cps         | 4.9 %         |
| 165Ho (KED) | 0.003 ppb             | 696 cps           | 8.0 %         |
| 166Er (KED) | 0.003 ppb             | 708 cps           | 6.4 %         |
| 169Tm (KED) | 0.001 ppb             | 299 cps           | 13.3 %        |
| 174Yb (KED) | 0.006 ppb             | 592 cps           | 16.1 %        |
| 175Lu (KED) | 0.001 ppb             | 141 cps           | 22.9 %        |
| 205Tl (KED) | 0.003 ppb             | 780 cps           | 8.5 %         |
| 208Pb (KED) | 0.357 ppb             | 75,874 cps        | 1.5 %         |
| 232Th (KED) | 0.035 ppb             | 12,283 cps        | 4.7 %         |
| 238U (KED)  | 0.013 ppb             | 4,804 cps         | 2.5 %         |

## Sample Summary

Instrument ID: iCAP Q

Analysis index: 14

Analysis name: 179363jian

Analysis started at: 9/1/2021 4:32:31 PM

User name: WINDOWS-UPCI4ER\Administrator

| Category    | Concentration average | Concentration RSD |
|-------------|-----------------------|-------------------|
| 9Be (KED)   | 0.010 ppb             | 173.2 %           |
| 11B (KED)   | 4.740 ppb             | 12.0 %            |
| 24Mg (KED)  | 554.105 ppb           | 0.9 %             |
| 27Al (KED)  | 437.544 ppb           | 1.9 %             |
| 51V (KED)   | 0.790 ppb             | 4.3 %             |
| 52Cr (KED)  | 2.875 ppb             | 1.0 %             |
| 55Mn (KED)  | 11.400 ppb            | 0.8 %             |
| 56Fe (KED)  | 433.554 ppb           | 0.1 %             |
| 58Ni (KED)  | 2.308 ppb             | 1.1 %             |
| 59Co (KED)  | 0.230 ppb             | 3.0 %             |
| 63Cu (KED)  | 14.030 ppb            | 0.5 %             |
| 64Zn (KED)  | 175.496 ppb           | 0.4 %             |
| 69Ga (KED)  | 1.107 ppb             | 2.9 %             |
| 75As (KED)  | 0.292 ppb             | 12.1 %            |
| 80Se (KED)  | 0.763 ppb             | 46.2 %            |
| 85Rb (KED)  | 2.397 ppb             | 1.5 %             |
| 88Sr (KED)  | 9.256 ppb             | 2.0 %             |
| 107Ag (KED) | 0.028 ppb             | 5.8 %             |
| 114Cd (KED) | 0.048 ppb             | 1.7 %             |
| 133Cs (KED) | 0.069 ppb             | 2.6 %             |
| 138Ba (KED) | 3.162 ppb             | 1.9 %             |
| 139La (KED) | 0.279 ppb             | 1.9 %             |
| 140Ce (KED) | 0.576 ppb             | 1.8 %             |
| 141Pr (KED) | 0.070 ppb             | 5.5 %             |
| 142Nd (KED) | 0.360 ppb             | 1.3 %             |
| 152Sm (KED) | 0.049 ppb             | 5.2 %             |
| 153Eu (KED) | 0.010 ppb             | 10.2 %            |
| 158Gd (KED) | 0.043 ppb             | 2.5 %             |
| 164Dy (KED) | 0.031 ppb             | 5.4 %             |
| 165Ho (KED) | 0.006 ppb             | 6.0 %             |
| 166Er (KED) | 0.010 ppb             | 7.4 %             |
| 169Tm (KED) | 0.002 ppb             | 3.9 %             |
| 174Yb (KED) | 0.013 ppb             | 5.0 %             |
| 175Lu (KED) | 0.002 ppb             | 16.8 %            |
| 205Tl (KED) | 0.005 ppb             | 5.9 %             |
| 208Pb (KED) | 0.634 ppb             | 3.0 %             |
| 232Th (KED) | 0.073 ppb             | 3.6 %             |
| 238U (KED)  | 0.024 ppb             | 3.6 %             |

| Category   | Concentration average | Intensity average | Intensity RSD |
|------------|-----------------------|-------------------|---------------|
| 9Be (KED)  | 0.010 ppb             | 2 cps             | 86.6 %        |
| 11B (KED)  | 4.740 ppb             | 453 cps           | 7.2 %         |
| 24Mg (KED) | 554.105 ppb           | 218,258 cps       | 0.9 %         |
| 27Al (KED) | 437.544 ppb           | 43,361 cps        | 1.9 %         |
| 51V (KED)  | 0.790 ppb             | 5,170 cps         | 4.3 %         |
| 52Cr (KED) | 2.875 ppb             | 29,411 cps        | 1.0 %         |
| 55Mn (KED) | 11.400 ppb            | 56,863 cps        | 0.8 %         |
| 56Fe (KED) | 433.554 ppb           | 4,114,223 cps     | 0.1 %         |
| 58Ni (KED) | 2.308 ppb             | 31,222 cps        | 1.0 %         |
| 59Co (KED) | 0.230 ppb             | 4,626 cps         | 3.0 %         |

| Category    | Concentration average | Intensity average | Intensity RSD |
|-------------|-----------------------|-------------------|---------------|
| 63Cu (KED)  | 14.030 ppb            | 225,144 cps       | 0.4 %         |
| 64Zn (KED)  | 175.496 ppb           | 694,984 cps       | 0.4 %         |
| 69Ga (KED)  | 1.107 ppb             | 5,994 cps         | 2.7 %         |
| 75As (KED)  | 0.292 ppb             | 361 cps           | 11.1 %        |
| 80Se (KED)  | 0.763 ppb             | 1,079 cps         | 10.8 %        |
| 85Rb (KED)  | 2.397 ppb             | 11,472 cps        | 1.5 %         |
| 88Sr (KED)  | 9.256 ppb             | 63,622 cps        | 2.0 %         |
| 107Ag (KED) | 0.028 ppb             | 1,945 cps         | 4.2 %         |
| 114Cd (KED) | 0.048 ppb             | 1,397 cps         | 1.1 %         |
| 133Cs (KED) | 0.069 ppb             | 1,936 cps         | 2.6 %         |
| 138Ba (KED) | 3.162 ppb             | 142,206 cps       | 1.7 %         |
| 139La (KED) | 0.279 ppb             | 23,187 cps        | 1.9 %         |
| 140Ce (KED) | 0.576 ppb             | 64,430 cps        | 1.8 %         |
| 141Pr (KED) | 0.070 ppb             | 8,176 cps         | 5.5 %         |
| 142Nd (KED) | 0.360 ppb             | 17,327 cps        | 1.3 %         |
| 152Sm (KED) | 0.049 ppb             | 2,244 cps         | 5.2 %         |
| 153Eu (KED) | 0.010 ppb             | 919 cps           | 10.0 %        |
| 158Gd (KED) | 0.043 ppb             | 2,780 cps         | 2.5 %         |
| 164Dy (KED) | 0.031 ppb             | 2,261 cps         | 5.4 %         |
| 165Ho (KED) | 0.006 ppb             | 1,546 cps         | 6.0 %         |
| 166Er (KED) | 0.010 ppb             | 1,349 cps         | 5.0 %         |
| 169Tm (KED) | 0.002 ppb             | 660 cps           | 3.8 %         |
| 174Yb (KED) | 0.013 ppb             | 1,358 cps         | 5.0 %         |
| 175Lu (KED) | 0.002 ppb             | 307 cps           | 16.4 %        |
| 205Tl (KED) | 0.005 ppb             | 1,199 cps         | 5.7 %         |
| 208Pb (KED) | 0.634 ppb             | 119,490 cps       | 2.5 %         |
| 232Th (KED) | 0.073 ppb             | 24,084 cps        | 3.4 %         |
| 238U (KED)  | 0.024 ppb             | 8,963 cps         | 3.6 %         |

## Sample Summary

Instrument ID: iCAP Q

Analysis index: 15

Analysis name: 179401jian

Analysis started at: 9/1/2021 4:35:35 PM

User name: WINDOWS-UPCI4ER\Administrator

| Category    | Concentration average | Concentration RSD |
|-------------|-----------------------|-------------------|
| 9Be (KED)   | 0.020 ppb             | 0.0 %             |
| 11B (KED)   | 1.985 ppb             | 62.3 %            |
| 24Mg (KED)  | 605.716 ppb           | 0.3 %             |
| 27Al (KED)  | 442.304 ppb           | 2.2 %             |
| 51V (KED)   | 0.822 ppb             | 3.8 %             |
| 52Cr (KED)  | 4.406 ppb             | 1.2 %             |
| 55Mn (KED)  | 12.062 ppb            | 1.2 %             |
| 56Fe (KED)  | 479.107 ppb           | 0.8 %             |
| 58Ni (KED)  | 3.581 ppb             | 2.2 %             |
| 59Co (KED)  | 0.241 ppb             | 3.5 %             |
| 63Cu (KED)  | 12.043 ppb            | 0.4 %             |
| 64Zn (KED)  | 171.961 ppb           | 1.1 %             |
| 69Ga (KED)  | 1.182 ppb             | 2.0 %             |
| 75As (KED)  | 0.338 ppb             | 7.6 %             |
| 80Se (KED)  | 1.125 ppb             | 11.7 %            |
| 85Rb (KED)  | 2.465 ppb             | 0.7 %             |
| 88Sr (KED)  | 10.922 ppb            | 2.6 %             |
| 107Ag (KED) | 0.103 ppb             | 4.2 %             |
| 114Cd (KED) | 0.070 ppb             | 1.2 %             |
| 133Cs (KED) | 0.073 ppb             | 4.1 %             |
| 138Ba (KED) | 3.330 ppb             | 0.9 %             |
| 139La (KED) | 0.277 ppb             | 2.5 %             |
| 140Ce (KED) | 0.569 ppb             | 2.2 %             |
| 141Pr (KED) | 0.069 ppb             | 2.0 %             |
| 142Nd (KED) | 0.355 ppb             | 2.5 %             |
| 152Sm (KED) | 0.052 ppb             | 1.8 %             |
| 153Eu (KED) | 0.010 ppb             | 5.3 %             |
| 158Gd (KED) | 0.046 ppb             | 3.1 %             |
| 164Dy (KED) | 0.032 ppb             | 1.9 %             |
| 165Ho (KED) | 0.006 ppb             | 5.6 %             |
| 166Er (KED) | 0.011 ppb             | 4.9 %             |
| 169Tm (KED) | 0.002 ppb             | 12.6 %            |
| 174Yb (KED) | 0.013 ppb             | 4.4 %             |
| 175Lu (KED) | 0.002 ppb             | 7.7 %             |
| 205Tl (KED) | 0.006 ppb             | 10.7 %            |
| 208Pb (KED) | 0.660 ppb             | 1.8 %             |
| 232Th (KED) | 0.074 ppb             | 3.7 %             |
| 238U (KED)  | 0.026 ppb             | 3.0 %             |

| Category   | Concentration average | Intensity average | Intensity RSD |
|------------|-----------------------|-------------------|---------------|
| 9Be (KED)  | 0.020 ppb             | 3 cps             | 0.0 %         |
| 11B (KED)  | 1.985 ppb             | 294 cps           | 24.2 %        |
| 24Mg (KED) | 605.716 ppb           | 238,528 cps       | 0.3 %         |
| 27Al (KED) | 442.304 ppb           | 43,831 cps        | 2.2 %         |
| 51V (KED)  | 0.822 ppb             | 5,379 cps         | 3.8 %         |
| 52Cr (KED) | 4.406 ppb             | 44,939 cps        | 1.2 %         |
| 55Mn (KED) | 12.062 ppb            | 60,152 cps        | 1.2 %         |
| 56Fe (KED) | 479.107 ppb           | 4,545,694 cps     | 0.8 %         |
| 58Ni (KED) | 3.581 ppb             | 46,826 cps        | 2.1 %         |
| 59Co (KED) | 0.241 ppb             | 4,833 cps         | 3.5 %         |

| Category    | Concentration average | Intensity average | Intensity RSD |
|-------------|-----------------------|-------------------|---------------|
| 63Cu (KED)  | 12.043 ppb            | 194,687 cps       | 0.3 %         |
| 64Zn (KED)  | 171.961 ppb           | 681,146 cps       | 1.1 %         |
| 69Ga (KED)  | 1.182 ppb             | 6,367 cps         | 1.9 %         |
| 75As (KED)  | 0.338 ppb             | 413 cps           | 7.0 %         |
| 80Se (KED)  | 1.125 ppb             | 1,199 cps         | 3.6 %         |
| 85Rb (KED)  | 2.465 ppb             | 11,794 cps        | 0.7 %         |
| 88Sr (KED)  | 10.922 ppb            | 75,021 cps        | 2.6 %         |
| 107Ag (KED) | 0.103 ppb             | 5,667 cps         | 3.8 %         |
| 114Cd (KED) | 0.070 ppb             | 1,802 cps         | 0.9 %         |
| 133Cs (KED) | 0.073 ppb             | 2,059 cps         | 4.0 %         |
| 138Ba (KED) | 3.330 ppb             | 148,923 cps       | 0.8 %         |
| 139La (KED) | 0.277 ppb             | 22,989 cps        | 2.5 %         |
| 140Ce (KED) | 0.569 ppb             | 63,668 cps        | 2.2 %         |
| 141Pr (KED) | 0.069 ppb             | 7,960 cps         | 1.9 %         |
| 142Nd (KED) | 0.355 ppb             | 17,055 cps        | 2.5 %         |
| 152Sm (KED) | 0.052 ppb             | 2,352 cps         | 1.8 %         |
| 153Eu (KED) | 0.010 ppb             | 890 cps           | 5.2 %         |
| 158Gd (KED) | 0.046 ppb             | 2,950 cps         | 3.1 %         |
| 164Dy (KED) | 0.032 ppb             | 2,322 cps         | 1.9 %         |
| 165Ho (KED) | 0.006 ppb             | 1,525 cps         | 5.5 %         |
| 166Er (KED) | 0.011 ppb             | 1,400 cps         | 3.3 %         |
| 169Tm (KED) | 0.002 ppb             | 632 cps           | 12.2 %        |
| 174Yb (KED) | 0.013 ppb             | 1,352 cps         | 4.4 %         |
| 175Lu (KED) | 0.002 ppb             | 298 cps           | 7.5 %         |
| 205Tl (KED) | 0.006 ppb             | 1,241 cps         | 10.4 %        |
| 208Pb (KED) | 0.660 ppb             | 123,557 cps       | 1.5 %         |
| 232Th (KED) | 0.074 ppb             | 24,497 cps        | 3.5 %         |
| 238U (KED)  | 0.026 ppb             | 9,619 cps         | 2.9 %         |

## Sample Summary

Instrument ID: iCAP Q

Analysis index: 16

Analysis name: 179411jian

Analysis started at: 9/1/2021 4:38:43 PM

User name: WINDOWS-UPCI4ER\Administrator

| Category    | Concentration average | Concentration RSD |
|-------------|-----------------------|-------------------|
| 9Be (KED)   | 0.020 ppb             | 150.0 %           |
| 11B (KED)   | 2.505 ppb             | 27.0 %            |
| 24Mg (KED)  | 499.808 ppb           | 0.7 %             |
| 27Al (KED)  | 452.648 ppb           | 0.9 %             |
| 51V (KED)   | 0.799 ppb             | 2.2 %             |
| 52Cr (KED)  | 3.620 ppb             | 1.2 %             |
| 55Mn (KED)  | 11.902 ppb            | 1.6 %             |
| 56Fe (KED)  | 431.254 ppb           | 1.5 %             |
| 58Ni (KED)  | 2.498 ppb             | 1.1 %             |
| 59Co (KED)  | 0.246 ppb             | 3.1 %             |
| 63Cu (KED)  | 13.315 ppb            | 0.9 %             |
| 64Zn (KED)  | 311.245 ppb           | 1.9 %             |
| 69Ga (KED)  | 1.075 ppb             | 2.8 %             |
| 75As (KED)  | 0.321 ppb             | 5.8 %             |
| 80Se (KED)  | 1.149 ppb             | 16.2 %            |
| 85Rb (KED)  | 2.697 ppb             | 0.9 %             |
| 88Sr (KED)  | 7.809 ppb             | 1.4 %             |
| 107Ag (KED) | 0.049 ppb             | 1.7 %             |
| 114Cd (KED) | 0.083 ppb             | 5.4 %             |
| 133Cs (KED) | 0.074 ppb             | 4.2 %             |
| 138Ba (KED) | 3.115 ppb             | 3.7 %             |
| 139La (KED) | 0.274 ppb             | 3.7 %             |
| 140Ce (KED) | 0.578 ppb             | 0.4 %             |
| 141Pr (KED) | 0.068 ppb             | 2.9 %             |
| 142Nd (KED) | 0.354 ppb             | 3.0 %             |
| 152Sm (KED) | 0.049 ppb             | 0.5 %             |
| 153Eu (KED) | 0.011 ppb             | 7.5 %             |
| 158Gd (KED) | 0.043 ppb             | 3.8 %             |
| 164Dy (KED) | 0.032 ppb             | 3.1 %             |
| 165Ho (KED) | 0.006 ppb             | 6.7 %             |
| 166Er (KED) | 0.011 ppb             | 6.8 %             |
| 169Tm (KED) | 0.002 ppb             | 1.4 %             |
| 174Yb (KED) | 0.014 ppb             | 1.8 %             |
| 175Lu (KED) | 0.002 ppb             | 10.5 %            |
| 205Tl (KED) | 0.006 ppb             | 5.1 %             |
| 208Pb (KED) | 0.665 ppb             | 1.1 %             |
| 232Th (KED) | 0.076 ppb             | 3.0 %             |
| 238U (KED)  | 0.030 ppb             | 2.5 %             |

| Category   | Concentration average | Intensity average | Intensity RSD |
|------------|-----------------------|-------------------|---------------|
| 9Be (KED)  | 0.020 ppb             | 3 cps             | 100.0 %       |
| 11B (KED)  | 2.505 ppb             | 324 cps           | 12.0 %        |
| 24Mg (KED) | 499.808 ppb           | 196,934 cps       | 0.7 %         |
| 27Al (KED) | 452.648 ppb           | 44,854 cps        | 0.9 %         |
| 51V (KED)  | 0.799 ppb             | 5,229 cps         | 2.2 %         |
| 52Cr (KED) | 3.620 ppb             | 36,969 cps        | 1.2 %         |
| 55Mn (KED) | 11.902 ppb            | 59,356 cps        | 1.5 %         |
| 56Fe (KED) | 431.254 ppb           | 4,092,438 cps     | 1.5 %         |
| 58Ni (KED) | 2.498 ppb             | 33,551 cps        | 1.0 %         |
| 59Co (KED) | 0.246 ppb             | 4,944 cps         | 3.1 %         |

| Category    | Concentration average | Intensity average | Intensity RSD |
|-------------|-----------------------|-------------------|---------------|
| 63Cu (KED)  | 13.315 ppb            | 214,182 cps       | 0.9 %         |
| 64Zn (KED)  | 311.245 ppb           | 1,226,371 cps     | 1.9 %         |
| 69Ga (KED)  | 1.075 ppb             | 5,836 cps         | 2.5 %         |
| 75As (KED)  | 0.321 ppb             | 394 cps           | 5.4 %         |
| 80Se (KED)  | 1.149 ppb             | 1,207 cps         | 5.1 %         |
| 85Rb (KED)  | 2.697 ppb             | 12,898 cps        | 0.9 %         |
| 88Sr (KED)  | 7.809 ppb             | 53,720 cps        | 1.4 %         |
| 107Ag (KED) | 0.049 ppb             | 2,956 cps         | 1.4 %         |
| 114Cd (KED) | 0.083 ppb             | 2,036 cps         | 4.1 %         |
| 133Cs (KED) | 0.074 ppb             | 2,075 cps         | 4.1 %         |
| 138Ba (KED) | 3.115 ppb             | 140,297 cps       | 3.3 %         |
| 139La (KED) | 0.274 ppb             | 22,798 cps        | 3.7 %         |
| 140Ce (KED) | 0.578 ppb             | 64,638 cps        | 0.4 %         |
| 141Pr (KED) | 0.068 ppb             | 7,854 cps         | 2.8 %         |
| 142Nd (KED) | 0.354 ppb             | 17,034 cps        | 3.0 %         |
| 152Sm (KED) | 0.049 ppb             | 2,246 cps         | 0.5 %         |
| 153Eu (KED) | 0.011 ppb             | 966 cps           | 7.4 %         |
| 158Gd (KED) | 0.043 ppb             | 2,787 cps         | 3.7 %         |
| 164Dy (KED) | 0.032 ppb             | 2,305 cps         | 3.0 %         |
| 165Ho (KED) | 0.006 ppb             | 1,550 cps         | 6.6 %         |
| 166Er (KED) | 0.011 ppb             | 1,409 cps         | 4.6 %         |
| 169Tm (KED) | 0.002 ppb             | 626 cps           | 1.3 %         |
| 174Yb (KED) | 0.014 ppb             | 1,451 cps         | 1.8 %         |
| 175Lu (KED) | 0.002 ppb             | 322 cps           | 10.2 %        |
| 205Tl (KED) | 0.006 ppb             | 1,400 cps         | 5.0 %         |
| 208Pb (KED) | 0.665 ppb             | 124,393 cps       | 0.9 %         |
| 232Th (KED) | 0.076 ppb             | 25,066 cps        | 2.8 %         |
| 238U (KED)  | 0.030 ppb             | 11,240 cps        | 2.5 %         |

## Sample Summary

Instrument ID: iCAP Q

Analysis index: 17

Analysis name: 179409jian

Analysis started at: 9/1/2021 4:42:01 PM

User name: WINDOWS-UPCI4ER\Administrator

| Category    | Concentration average | Concentration RSD             |
|-------------|-----------------------|-------------------------------|
| 9Be (KED)   | 0.000 ppb             | 1,567,880,022,109,980,000.0 % |
| 11B (KED)   | 1.464 ppb             | 12.1 %                        |
| 24Mg (KED)  | 429.786 ppb           | 0.9 %                         |
| 27Al (KED)  | 296.026 ppb           | 2.1 %                         |
| 51V (KED)   | 0.504 ppb             | 4.1 %                         |
| 52Cr (KED)  | 2.126 ppb             | 3.2 %                         |
| 55Mn (KED)  | 7.432 ppb             | 0.8 %                         |
| 56Fe (KED)  | 292.031 ppb           | 2.2 %                         |
| 58Ni (KED)  | 1.626 ppb             | 2.1 %                         |
| 59Co (KED)  | 0.165 ppb             | 4.0 %                         |
| 63Cu (KED)  | 11.909 ppb            | 0.2 %                         |
| 64Zn (KED)  | 173.507 ppb           | 1.2 %                         |
| 69Ga (KED)  | 0.753 ppb             | 8.3 %                         |
| 75As (KED)  | 0.193 ppb             | 8.1 %                         |
| 80Se (KED)  | 1.078 ppb             | 13.3 %                        |
| 85Rb (KED)  | 3.252 ppb             | 1.1 %                         |
| 88Sr (KED)  | 6.887 ppb             | 0.6 %                         |
| 107Ag (KED) | 0.027 ppb             | 3.1 %                         |
| 114Cd (KED) | 0.064 ppb             | 12.2 %                        |
| 133Cs (KED) | 0.045 ppb             | 7.0 %                         |
| 138Ba (KED) | 2.034 ppb             | 2.9 %                         |
| 139La (KED) | 0.162 ppb             | 2.0 %                         |
| 140Ce (KED) | 0.344 ppb             | 0.5 %                         |
| 141Pr (KED) | 0.039 ppb             | 1.0 %                         |
| 142Nd (KED) | 0.211 ppb             | 1.1 %                         |
| 152Sm (KED) | 0.031 ppb             | 4.6 %                         |
| 153Eu (KED) | 0.006 ppb             | 14.2 %                        |
| 158Gd (KED) | 0.027 ppb             | 5.4 %                         |
| 164Dy (KED) | 0.021 ppb             | 1.4 %                         |
| 165Ho (KED) | 0.004 ppb             | 3.6 %                         |
| 166Er (KED) | 0.005 ppb             | 3.8 %                         |
| 169Tm (KED) | 0.001 ppb             | 14.2 %                        |
| 174Yb (KED) | 0.008 ppb             | 8.4 %                         |
| 175Lu (KED) | 0.001 ppb             | 9.4 %                         |
| 205Tl (KED) | 0.004 ppb             | 10.9 %                        |
| 208Pb (KED) | 0.430 ppb             | 3.6 %                         |
| 232Th (KED) | 0.046 ppb             | 3.9 %                         |
| 238U (KED)  | 0.016 ppb             | 2.6 %                         |

| Category   | Concentration average | Intensity average | Intensity RSD |
|------------|-----------------------|-------------------|---------------|
| 9Be (KED)  | 0.000 ppb             | 1 cps             | 173.2 %       |
| 11B (KED)  | 1.464 ppb             | 264 cps           | 3.9 %         |
| 24Mg (KED) | 429.786 ppb           | 169,433 cps       | 0.9 %         |
| 27Al (KED) | 296.026 ppb           | 29,371 cps        | 2.1 %         |
| 51V (KED)  | 0.504 ppb             | 3,300 cps         | 4.1 %         |
| 52Cr (KED) | 2.126 ppb             | 21,821 cps        | 3.2 %         |
| 55Mn (KED) | 7.432 ppb             | 37,152 cps        | 0.8 %         |
| 56Fe (KED) | 292.031 ppb           | 2,773,739 cps     | 2.1 %         |
| 58Ni (KED) | 1.626 ppb             | 22,864 cps        | 1.8 %         |
| 59Co (KED) | 0.165 ppb             | 3,309 cps         | 4.0 %         |

| Category    | Concentration average | Intensity average | Intensity RSD |
|-------------|-----------------------|-------------------|---------------|
| 63Cu (KED)  | 11.909 ppb            | 192,637 cps       | 0.2 %         |
| 64Zn (KED)  | 173.507 ppb           | 687,198 cps       | 1.2 %         |
| 69Ga (KED)  | 0.753 ppb             | 4,236 cps         | 7.3 %         |
| 75As (KED)  | 0.193 ppb             | 250 cps           | 7.1 %         |
| 80Se (KED)  | 1.078 ppb             | 1,183 cps         | 4.0 %         |
| 85Rb (KED)  | 3.252 ppb             | 15,539 cps        | 1.1 %         |
| 88Sr (KED)  | 6.887 ppb             | 47,409 cps        | 0.6 %         |
| 107Ag (KED) | 0.027 ppb             | 1,878 cps         | 2.2 %         |
| 114Cd (KED) | 0.064 ppb             | 1,690 cps         | 8.6 %         |
| 133Cs (KED) | 0.045 ppb             | 1,272 cps         | 6.9 %         |
| 138Ba (KED) | 2.034 ppb             | 96,876 cps        | 2.5 %         |
| 139La (KED) | 0.162 ppb             | 13,469 cps        | 1.9 %         |
| 140Ce (KED) | 0.344 ppb             | 38,509 cps        | 0.5 %         |
| 141Pr (KED) | 0.039 ppb             | 4,575 cps         | 1.0 %         |
| 142Nd (KED) | 0.211 ppb             | 10,144 cps        | 1.1 %         |
| 152Sm (KED) | 0.031 ppb             | 1,409 cps         | 4.6 %         |
| 153Eu (KED) | 0.006 ppb             | 588 cps           | 13.7 %        |
| 158Gd (KED) | 0.027 ppb             | 1,748 cps         | 5.4 %         |
| 164Dy (KED) | 0.021 ppb             | 1,491 cps         | 1.3 %         |
| 165Ho (KED) | 0.004 ppb             | 967 cps           | 3.6 %         |
| 166Er (KED) | 0.005 ppb             | 841 cps           | 1.8 %         |
| 169Tm (KED) | 0.001 ppb             | 400 cps           | 13.4 %        |
| 174Yb (KED) | 0.008 ppb             | 824 cps           | 8.3 %         |
| 175Lu (KED) | 0.001 ppb             | 182 cps           | 9.0 %         |
| 205Tl (KED) | 0.004 ppb             | 983 cps           | 10.5 %        |
| 208Pb (KED) | 0.430 ppb             | 87,379 cps        | 2.8 %         |
| 232Th (KED) | 0.046 ppb             | 15,614 cps        | 3.6 %         |
| 238U (KED)  | 0.016 ppb             | 6,113 cps         | 2.5 %         |

## Sample Summary

Instrument ID: iCAP Q

Analysis index: 18

Analysis name: 634755jian

Analysis started at: 9/1/2021 4:45:23 PM

User name: WINDOWS-UPCI4ER\Administrator

| Category    | Concentration average | Concentration RSD |
|-------------|-----------------------|-------------------|
| 9Be (KED)   | 0.031 ppb             | 152.8 %           |
| 11B (KED)   | 6.936 ppb             | 14.2 %            |
| 24Mg (KED)  | 840.246 ppb           | 1.1 %             |
| 27Al (KED)  | 1,050.913 ppb         | 0.5 %             |
| 51V (KED)   | 1.979 ppb             | 2.9 %             |
| 52Cr (KED)  | 4.794 ppb             | 0.3 %             |
| 55Mn (KED)  | 27.832 ppb            | 3.0 %             |
| 56Fe (KED)  | 1,087.193 ppb         | 1.1 %             |
| 58Ni (KED)  | 4.844 ppb             | 0.6 %             |
| 59Co (KED)  | 0.544 ppb             | 2.0 %             |
| 63Cu (KED)  | 10.260 ppb            | 1.0 %             |
| 64Zn (KED)  | 176.722 ppb           | 0.5 %             |
| 69Ga (KED)  | 2.314 ppb             | 2.3 %             |
| 75As (KED)  | 0.689 ppb             | 3.5 %             |
| 80Se (KED)  | 0.887 ppb             | 51.5 %            |
| 85Rb (KED)  | 2.485 ppb             | 0.7 %             |
| 88Sr (KED)  | 10.182 ppb            | 1.1 %             |
| 107Ag (KED) | 0.052 ppb             | 5.6 %             |
| 114Cd (KED) | 0.058 ppb             | 5.4 %             |
| 133Cs (KED) | 0.190 ppb             | 3.3 %             |
| 138Ba (KED) | 6.792 ppb             | 2.2 %             |
| 139La (KED) | 0.795 ppb             | 0.4 %             |
| 140Ce (KED) | 1.633 ppb             | 1.2 %             |
| 141Pr (KED) | 0.193 ppb             | 0.4 %             |
| 142Nd (KED) | 0.994 ppb             | 1.3 %             |
| 152Sm (KED) | 0.139 ppb             | 3.0 %             |
| 153Eu (KED) | 0.026 ppb             | 3.2 %             |
| 158Gd (KED) | 0.130 ppb             | 3.6 %             |
| 164Dy (KED) | 0.092 ppb             | 2.9 %             |
| 165Ho (KED) | 0.017 ppb             | 1.6 %             |
| 166Er (KED) | 0.040 ppb             | 3.8 %             |
| 169Tm (KED) | 0.006 ppb             | 6.6 %             |
| 174Yb (KED) | 0.037 ppb             | 3.7 %             |
| 175Lu (KED) | 0.005 ppb             | 3.2 %             |
| 205Tl (KED) | 0.013 ppb             | 2.9 %             |
| 208Pb (KED) | 0.922 ppb             | 1.2 %             |
| 232Th (KED) | 0.208 ppb             | 1.2 %             |
| 238U (KED)  | 0.056 ppb             | 0.3 %             |

| Category   | Concentration average | Intensity average | Intensity RSD |
|------------|-----------------------|-------------------|---------------|
| 9Be (KED)  | 0.031 ppb             | 4 cps             | 114.6 %       |
| 11B (KED)  | 6.936 ppb             | 580 cps           | 9.8 %         |
| 24Mg (KED) | 840.246 ppb           | 330,636 cps       | 1.1 %         |
| 27Al (KED) | 1,050.913 ppb         | 103,995 cps       | 0.5 %         |
| 51V (KED)  | 1.979 ppb             | 12,933 cps        | 2.9 %         |
| 52Cr (KED) | 4.794 ppb             | 48,879 cps        | 0.2 %         |
| 55Mn (KED) | 27.832 ppb            | 138,482 cps       | 3.0 %         |
| 56Fe (KED) | 1,087.193 ppb         | 10,305,394 cps    | 1.1 %         |
| 58Ni (KED) | 4.844 ppb             | 62,314 cps        | 0.5 %         |
| 59Co (KED) | 0.544 ppb             | 10,903 cps        | 2.0 %         |

| Category    | Concentration average | Intensity average | Intensity RSD |
|-------------|-----------------------|-------------------|---------------|
| 63Cu (KED)  | 10.260 ppb            | 167,361 cps       | 1.0 %         |
| 64Zn (KED)  | 176.722 ppb           | 699,783 cps       | 0.5 %         |
| 69Ga (KED)  | 2.314 ppb             | 11,996 cps        | 2.2 %         |
| 75As (KED)  | 0.689 ppb             | 811 cps           | 3.3 %         |
| 80Se (KED)  | 0.887 ppb             | 1,120 cps         | 13.5 %        |
| 85Rb (KED)  | 2.485 ppb             | 11,892 cps        | 0.7 %         |
| 88Sr (KED)  | 10.182 ppb            | 69,955 cps        | 1.1 %         |
| 107Ag (KED) | 0.052 ppb             | 3,133 cps         | 4.7 %         |
| 114Cd (KED) | 0.058 ppb             | 1,582 cps         | 3.7 %         |
| 133Cs (KED) | 0.190 ppb             | 5,318 cps         | 3.3 %         |
| 138Ba (KED) | 6.792 ppb             | 287,986 cps       | 2.1 %         |
| 139La (KED) | 0.795 ppb             | 65,951 cps        | 0.4 %         |
| 140Ce (KED) | 1.633 ppb             | 182,348 cps       | 1.2 %         |
| 141Pr (KED) | 0.193 ppb             | 22,382 cps        | 0.4 %         |
| 142Nd (KED) | 0.994 ppb             | 47,684 cps        | 1.3 %         |
| 152Sm (KED) | 0.139 ppb             | 6,310 cps         | 3.0 %         |
| 153Eu (KED) | 0.026 ppb             | 2,357 cps         | 3.2 %         |
| 158Gd (KED) | 0.130 ppb             | 8,324 cps         | 3.6 %         |
| 164Dy (KED) | 0.092 ppb             | 6,626 cps         | 2.9 %         |
| 165Ho (KED) | 0.017 ppb             | 4,297 cps         | 1.6 %         |
| 166Er (KED) | 0.040 ppb             | 3,954 cps         | 3.4 %         |
| 169Tm (KED) | 0.006 ppb             | 1,842 cps         | 6.5 %         |
| 174Yb (KED) | 0.037 ppb             | 3,877 cps         | 3.7 %         |
| 175Lu (KED) | 0.005 ppb             | 904 cps           | 3.1 %         |
| 205Tl (KED) | 0.013 ppb             | 2,907 cps         | 2.9 %         |
| 208Pb (KED) | 0.922 ppb             | 164,759 cps       | 1.0 %         |
| 232Th (KED) | 0.208 ppb             | 66,099 cps        | 1.1 %         |
| 238U (KED)  | 0.056 ppb             | 20,691 cps        | 0.3 %         |

## Sample Summary

Instrument ID: iCAP Q

Analysis index: 19

Analysis name: 046681(178563)jian

Analysis started at: 9/1/2021 4:48:38 PM

User name: WINDOWS-UPCI4ER\Administrator

| Category    | Concentration average | Concentration RSD |
|-------------|-----------------------|-------------------|
| 9Be (KED)   | 0.010 ppb             | 173.2 %           |
| 11B (KED)   | 10.539 ppb            | 11.7 %            |
| 24Mg (KED)  | 661.828 ppb           | 0.9 %             |
| 27Al (KED)  | 857.818 ppb           | 0.8 %             |
| 51V (KED)   | 1.393 ppb             | 0.7 %             |
| 52Cr (KED)  | 2.841 ppb             | 1.2 %             |
| 55Mn (KED)  | 19.903 ppb            | 0.8 %             |
| 56Fe (KED)  | 719.051 ppb           | 0.9 %             |
| 58Ni (KED)  | 3.462 ppb             | 1.3 %             |
| 59Co (KED)  | 0.373 ppb             | 5.0 %             |
| 63Cu (KED)  | 10.956 ppb            | 1.4 %             |
| 64Zn (KED)  | 156.479 ppb           | 0.8 %             |
| 69Ga (KED)  | 1.849 ppb             | 2.2 %             |
| 75As (KED)  | 0.576 ppb             | 2.2 %             |
| 80Se (KED)  | 1.011 ppb             | 37.7 %            |
| 85Rb (KED)  | 1.971 ppb             | 2.0 %             |
| 88Sr (KED)  | 8.076 ppb             | 1.0 %             |
| 107Ag (KED) | 0.025 ppb             | 5.0 %             |
| 114Cd (KED) | 0.074 ppb             | 4.9 %             |
| 133Cs (KED) | 0.133 ppb             | 7.8 %             |
| 138Ba (KED) | 5.339 ppb             | 1.5 %             |
| 139La (KED) | 0.445 ppb             | 0.7 %             |
| 140Ce (KED) | 0.939 ppb             | 0.9 %             |
| 141Pr (KED) | 0.107 ppb             | 2.4 %             |
| 142Nd (KED) | 0.563 ppb             | 1.4 %             |
| 152Sm (KED) | 0.081 ppb             | 3.1 %             |
| 153Eu (KED) | 0.016 ppb             | 0.8 %             |
| 158Gd (KED) | 0.075 ppb             | 5.2 %             |
| 164Dy (KED) | 0.052 ppb             | 4.0 %             |
| 165Ho (KED) | 0.010 ppb             | 1.3 %             |
| 166Er (KED) | 0.022 ppb             | 1.9 %             |
| 169Tm (KED) | 0.003 ppb             | 5.2 %             |
| 174Yb (KED) | 0.021 ppb             | 5.3 %             |
| 175Lu (KED) | 0.003 ppb             | 3.6 %             |
| 205Tl (KED) | 0.012 ppb             | 3.1 %             |
| 208Pb (KED) | 0.950 ppb             | 2.8 %             |
| 232Th (KED) | 0.136 ppb             | 1.5 %             |
| 238U (KED)  | 0.040 ppb             | 2.8 %             |

| Category   | Concentration average | Intensity average | Intensity RSD |
|------------|-----------------------|-------------------|---------------|
| 9Be (KED)  | 0.010 ppb             | 2 cps             | 86.6 %        |
| 11B (KED)  | 10.539 ppb            | 788 cps           | 9.0 %         |
| 24Mg (KED) | 661.828 ppb           | 260,565 cps       | 0.9 %         |
| 27Al (KED) | 857.818 ppb           | 84,907 cps        | 0.8 %         |
| 51V (KED)  | 1.393 ppb             | 9,104 cps         | 0.7 %         |
| 52Cr (KED) | 2.841 ppb             | 29,075 cps        | 1.2 %         |
| 55Mn (KED) | 19.903 ppb            | 99,097 cps        | 0.8 %         |
| 56Fe (KED) | 719.051 ppb           | 6,818,413 cps     | 0.9 %         |
| 58Ni (KED) | 3.462 ppb             | 45,365 cps        | 1.3 %         |
| 59Co (KED) | 0.373 ppb             | 7,479 cps         | 5.0 %         |

| Category    | Concentration average | Intensity average | Intensity RSD |
|-------------|-----------------------|-------------------|---------------|
| 63Cu (KED)  | 10.956 ppb            | 178,030 cps       | 1.4 %         |
| 64Zn (KED)  | 156.479 ppb           | 620,543 cps       | 0.8 %         |
| 69Ga (KED)  | 1.849 ppb             | 9,683 cps         | 2.1 %         |
| 75As (KED)  | 0.576 ppb             | 683 cps           | 2.1 %         |
| 80Se (KED)  | 1.011 ppb             | 1,161 cps         | 10.9 %        |
| 85Rb (KED)  | 1.971 ppb             | 9,448 cps         | 2.0 %         |
| 88Sr (KED)  | 8.076 ppb             | 55,545 cps        | 0.9 %         |
| 107Ag (KED) | 0.025 ppb             | 1,765 cps         | 3.5 %         |
| 114Cd (KED) | 0.074 ppb             | 1,878 cps         | 3.6 %         |
| 133Cs (KED) | 0.133 ppb             | 3,731 cps         | 7.7 %         |
| 138Ba (KED) | 5.339 ppb             | 229,633 cps       | 1.4 %         |
| 139La (KED) | 0.445 ppb             | 36,925 cps        | 0.7 %         |
| 140Ce (KED) | 0.939 ppb             | 104,956 cps       | 0.9 %         |
| 141Pr (KED) | 0.107 ppb             | 12,387 cps        | 2.4 %         |
| 142Nd (KED) | 0.563 ppb             | 27,042 cps        | 1.4 %         |
| 152Sm (KED) | 0.081 ppb             | 3,663 cps         | 3.1 %         |
| 153Eu (KED) | 0.016 ppb             | 1,497 cps         | 0.8 %         |
| 158Gd (KED) | 0.075 ppb             | 4,786 cps         | 5.2 %         |
| 164Dy (KED) | 0.052 ppb             | 3,748 cps         | 4.0 %         |
| 165Ho (KED) | 0.010 ppb             | 2,419 cps         | 1.3 %         |
| 166Er (KED) | 0.022 ppb             | 2,387 cps         | 1.6 %         |
| 169Tm (KED) | 0.003 ppb             | 1,019 cps         | 5.1 %         |
| 174Yb (KED) | 0.021 ppb             | 2,185 cps         | 5.3 %         |
| 175Lu (KED) | 0.003 ppb             | 469 cps           | 3.5 %         |
| 205Tl (KED) | 0.012 ppb             | 2,639 cps         | 3.1 %         |
| 208Pb (KED) | 0.950 ppb             | 169,203 cps       | 2.5 %         |
| 232Th (KED) | 0.136 ppb             | 43,717 cps        | 1.5 %         |
| 238U (KED)  | 0.040 ppb             | 14,792 cps        | 2.8 %         |

## Sample Summary

Instrument ID: iCAP Q

Analysis index: 20

Analysis name: 027918(178637)jian

Analysis started at: 9/1/2021 4:51:50 PM

User name: WINDOWS-UPCI4ER\Administrator

| Category    | Concentration average | Concentration RSD |
|-------------|-----------------------|-------------------|
| 9Be (KED)   | 0.041 ppb             | 86.6 %            |
| 11B (KED)   | 4.162 ppb             | 26.5 %            |
| 24Mg (KED)  | 879.068 ppb           | 1.5 %             |
| 27Al (KED)  | 1,043.830 ppb         | 1.7 %             |
| 51V (KED)   | 1.943 ppb             | 1.9 %             |
| 52Cr (KED)  | 4.362 ppb             | 1.2 %             |
| 55Mn (KED)  | 27.614 ppb            | 2.0 %             |
| 56Fe (KED)  | 1,067.236 ppb         | 1.5 %             |
| 58Ni (KED)  | 5.178 ppb             | 1.1 %             |
| 59Co (KED)  | 0.501 ppb             | 0.8 %             |
| 63Cu (KED)  | 12.117 ppb            | 1.1 %             |
| 64Zn (KED)  | 158.639 ppb           | 0.4 %             |
| 69Ga (KED)  | 2.709 ppb             | 0.6 %             |
| 75As (KED)  | 0.629 ppb             | 3.7 %             |
| 80Se (KED)  | 0.766 ppb             | 14.9 %            |
| 85Rb (KED)  | 3.319 ppb             | 2.6 %             |
| 88Sr (KED)  | 11.183 ppb            | 1.0 %             |
| 107Ag (KED) | 0.131 ppb             | 0.3 %             |
| 114Cd (KED) | 0.132 ppb             | 5.8 %             |
| 133Cs (KED) | 0.173 ppb             | 5.1 %             |
| 138Ba (KED) | 8.157 ppb             | 1.0 %             |
| 139La (KED) | 0.737 ppb             | 0.4 %             |
| 140Ce (KED) | 1.576 ppb             | 1.2 %             |
| 141Pr (KED) | 0.178 ppb             | 1.6 %             |
| 142Nd (KED) | 0.948 ppb             | 1.3 %             |
| 152Sm (KED) | 0.135 ppb             | 5.9 %             |
| 153Eu (KED) | 0.024 ppb             | 1.0 %             |
| 158Gd (KED) | 0.121 ppb             | 2.2 %             |
| 164Dy (KED) | 0.083 ppb             | 0.6 %             |
| 165Ho (KED) | 0.016 ppb             | 0.8 %             |
| 166Er (KED) | 0.038 ppb             | 6.3 %             |
| 169Tm (KED) | 0.006 ppb             | 5.2 %             |
| 174Yb (KED) | 0.035 ppb             | 2.9 %             |
| 175Lu (KED) | 0.005 ppb             | 5.1 %             |
| 205Tl (KED) | 0.012 ppb             | 1.7 %             |
| 208Pb (KED) | 1.071 ppb             | 2.0 %             |
| 232Th (KED) | 0.223 ppb             | 2.6 %             |
| 238U (KED)  | 0.060 ppb             | 1.2 %             |

| Category   | Concentration average | Intensity average | Intensity RSD |
|------------|-----------------------|-------------------|---------------|
| 9Be (KED)  | 0.041 ppb             | 6 cps             | 69.3 %        |
| 11B (KED)  | 4.162 ppb             | 420 cps           | 15.1 %        |
| 24Mg (KED) | 879.068 ppb           | 345,883 cps       | 1.5 %         |
| 27Al (KED) | 1,043.830 ppb         | 103,295 cps       | 1.7 %         |
| 51V (KED)  | 1.943 ppb             | 12,696 cps        | 1.9 %         |
| 52Cr (KED) | 4.362 ppb             | 44,492 cps        | 1.2 %         |
| 55Mn (KED) | 27.614 ppb            | 137,401 cps       | 1.9 %         |
| 56Fe (KED) | 1,067.236 ppb         | 10,116,366 cps    | 1.5 %         |
| 58Ni (KED) | 5.178 ppb             | 66,415 cps        | 1.1 %         |
| 59Co (KED) | 0.501 ppb             | 10,034 cps        | 0.8 %         |

| Category    | Concentration average | Intensity average | Intensity RSD |
|-------------|-----------------------|-------------------|---------------|
| 63Cu (KED)  | 12.117 ppb            | 195,822 cps       | 1.0 %         |
| 64Zn (KED)  | 158.639 ppb           | 628,999 cps       | 0.4 %         |
| 69Ga (KED)  | 2.709 ppb             | 13,959 cps        | 0.6 %         |
| 75As (KED)  | 0.629 ppb             | 743 cps           | 3.6 %         |
| 80Se (KED)  | 0.766 ppb             | 1,080 cps         | 3.5 %         |
| 85Rb (KED)  | 3.319 ppb             | 15,858 cps        | 2.6 %         |
| 88Sr (KED)  | 11.183 ppb            | 76,808 cps        | 1.0 %         |
| 107Ag (KED) | 0.131 ppb             | 7,039 cps         | 0.3 %         |
| 114Cd (KED) | 0.132 ppb             | 2,956 cps         | 4.9 %         |
| 133Cs (KED) | 0.173 ppb             | 4,835 cps         | 5.1 %         |
| 138Ba (KED) | 8.157 ppb             | 342,814 cps       | 0.9 %         |
| 139La (KED) | 0.737 ppb             | 61,208 cps        | 0.4 %         |
| 140Ce (KED) | 1.576 ppb             | 176,072 cps       | 1.2 %         |
| 141Pr (KED) | 0.178 ppb             | 20,555 cps        | 1.6 %         |
| 142Nd (KED) | 0.948 ppb             | 45,491 cps        | 1.3 %         |
| 152Sm (KED) | 0.135 ppb             | 6,128 cps         | 5.8 %         |
| 153Eu (KED) | 0.024 ppb             | 2,136 cps         | 1.0 %         |
| 158Gd (KED) | 0.121 ppb             | 7,754 cps         | 2.2 %         |
| 164Dy (KED) | 0.083 ppb             | 5,975 cps         | 0.6 %         |
| 165Ho (KED) | 0.016 ppb             | 3,975 cps         | 0.8 %         |
| 166Er (KED) | 0.038 ppb             | 3,723 cps         | 5.5 %         |
| 169Tm (KED) | 0.006 ppb             | 1,712 cps         | 5.2 %         |
| 174Yb (KED) | 0.035 ppb             | 3,762 cps         | 2.9 %         |
| 175Lu (KED) | 0.005 ppb             | 846 cps           | 5.0 %         |
| 205Tl (KED) | 0.012 ppb             | 2,694 cps         | 1.7 %         |
| 208Pb (KED) | 1.071 ppb             | 188,326 cps       | 1.7 %         |
| 232Th (KED) | 0.223 ppb             | 70,878 cps        | 2.6 %         |
| 238U (KED)  | 0.060 ppb             | 21,991 cps        | 1.2 %         |

## Sample Summary

Instrument ID: iCAP Q

Analysis index: 21

Analysis name: 046377(178684)jian

Analysis started at: 9/1/2021 4:55:01 PM

User name: WINDOWS-UPCI4ER\Administrator

| Category    | Concentration average | Concentration RSD |
|-------------|-----------------------|-------------------|
| 9Be (KED)   | 0.010 ppb             | 346.4 %           |
| 11B (KED)   | 3.141 ppb             | 25.8 %            |
| 24Mg (KED)  | 636.976 ppb           | 2.2 %             |
| 27Al (KED)  | 657.621 ppb           | 2.4 %             |
| 51V (KED)   | 1.196 ppb             | 4.0 %             |
| 52Cr (KED)  | 2.733 ppb             | 2.6 %             |
| 55Mn (KED)  | 18.189 ppb            | 1.4 %             |
| 56Fe (KED)  | 646.309 ppb           | 2.6 %             |
| 58Ni (KED)  | 3.039 ppb             | 2.3 %             |
| 59Co (KED)  | 0.392 ppb             | 2.9 %             |
| 63Cu (KED)  | 10.203 ppb            | 1.6 %             |
| 64Zn (KED)  | 173.275 ppb           | 1.6 %             |
| 69Ga (KED)  | 1.665 ppb             | 3.0 %             |
| 75As (KED)  | 0.458 ppb             | 3.4 %             |
| 80Se (KED)  | 1.428 ppb             | 23.6 %            |
| 85Rb (KED)  | 3.397 ppb             | 3.2 %             |
| 88Sr (KED)  | 7.945 ppb             | 1.8 %             |
| 107Ag (KED) | 0.057 ppb             | 6.0 %             |
| 114Cd (KED) | 0.081 ppb             | 4.2 %             |
| 133Cs (KED) | 0.102 ppb             | 2.4 %             |
| 138Ba (KED) | 4.624 ppb             | 1.9 %             |
| 139La (KED) | 0.469 ppb             | 0.6 %             |
| 140Ce (KED) | 0.987 ppb             | 0.8 %             |
| 141Pr (KED) | 0.113 ppb             | 0.9 %             |
| 142Nd (KED) | 0.601 ppb             | 1.2 %             |
| 152Sm (KED) | 0.085 ppb             | 2.6 %             |
| 153Eu (KED) | 0.016 ppb             | 2.7 %             |
| 158Gd (KED) | 0.071 ppb             | 3.0 %             |
| 164Dy (KED) | 0.050 ppb             | 2.7 %             |
| 165Ho (KED) | 0.009 ppb             | 3.7 %             |
| 166Er (KED) | 0.019 ppb             | 7.0 %             |
| 169Tm (KED) | 0.003 ppb             | 9.3 %             |
| 174Yb (KED) | 0.020 ppb             | 2.3 %             |
| 175Lu (KED) | 0.003 ppb             | 7.4 %             |
| 205Tl (KED) | 0.012 ppb             | 1.3 %             |
| 208Pb (KED) | 0.674 ppb             | 1.6 %             |
| 232Th (KED) | 0.114 ppb             | 0.7 %             |
| 238U (KED)  | 0.032 ppb             | 0.8 %             |

| Category   | Concentration average | Intensity average | Intensity RSD |
|------------|-----------------------|-------------------|---------------|
| 9Be (KED)  | 0.010 ppb             | 2 cps             | 173.2 %       |
| 11B (KED)  | 3.141 ppb             | 361 cps           | 12.9 %        |
| 24Mg (KED) | 636.976 ppb           | 250,804 cps       | 2.2 %         |
| 27Al (KED) | 657.621 ppb           | 65,116 cps        | 2.4 %         |
| 51V (KED)  | 1.196 ppb             | 7,819 cps         | 4.0 %         |
| 52Cr (KED) | 2.733 ppb             | 27,972 cps        | 2.5 %         |
| 55Mn (KED) | 18.189 ppb            | 90,587 cps        | 1.4 %         |
| 56Fe (KED) | 646.309 ppb           | 6,129,415 cps     | 2.6 %         |
| 58Ni (KED) | 3.039 ppb             | 40,178 cps        | 2.2 %         |
| 59Co (KED) | 0.392 ppb             | 7,868 cps         | 2.9 %         |

| Category    | Concentration average | Intensity average | Intensity RSD |
|-------------|-----------------------|-------------------|---------------|
| 63Cu (KED)  | 10.203 ppb            | 166,488 cps       | 1.5 %         |
| 64Zn (KED)  | 173.275 ppb           | 686,290 cps       | 1.5 %         |
| 69Ga (KED)  | 1.665 ppb             | 8,766 cps         | 2.9 %         |
| 75As (KED)  | 0.458 ppb             | 550 cps           | 3.2 %         |
| 80Se (KED)  | 1.428 ppb             | 1,299 cps         | 8.6 %         |
| 85Rb (KED)  | 3.397 ppb             | 16,229 cps        | 3.2 %         |
| 88Sr (KED)  | 7.945 ppb             | 54,645 cps        | 1.8 %         |
| 107Ag (KED) | 0.057 ppb             | 3,348 cps         | 5.0 %         |
| 114Cd (KED) | 0.081 ppb             | 2,008 cps         | 3.2 %         |
| 133Cs (KED) | 0.102 ppb             | 2,853 cps         | 2.4 %         |
| 138Ba (KED) | 4.624 ppb             | 200,918 cps       | 1.8 %         |
| 139La (KED) | 0.469 ppb             | 38,975 cps        | 0.6 %         |
| 140Ce (KED) | 0.987 ppb             | 110,301 cps       | 0.8 %         |
| 141Pr (KED) | 0.113 ppb             | 13,143 cps        | 0.9 %         |
| 142Nd (KED) | 0.601 ppb             | 28,868 cps        | 1.2 %         |
| 152Sm (KED) | 0.085 ppb             | 3,842 cps         | 2.5 %         |
| 153Eu (KED) | 0.016 ppb             | 1,476 cps         | 2.7 %         |
| 158Gd (KED) | 0.071 ppb             | 4,582 cps         | 3.0 %         |
| 164Dy (KED) | 0.050 ppb             | 3,588 cps         | 2.7 %         |
| 165Ho (KED) | 0.009 ppb             | 2,297 cps         | 3.7 %         |
| 166Er (KED) | 0.019 ppb             | 2,102 cps         | 5.5 %         |
| 169Tm (KED) | 0.003 ppb             | 1,001 cps         | 9.1 %         |
| 174Yb (KED) | 0.020 ppb             | 2,078 cps         | 2.3 %         |
| 175Lu (KED) | 0.003 ppb             | 459 cps           | 7.3 %         |
| 205Tl (KED) | 0.012 ppb             | 2,700 cps         | 1.3 %         |
| 208Pb (KED) | 0.674 ppb             | 125,855 cps       | 1.3 %         |
| 232Th (KED) | 0.114 ppb             | 36,893 cps        | 0.7 %         |
| 238U (KED)  | 0.032 ppb             | 11,987 cps        | 0.8 %         |

## Sample Summary

Instrument ID: iCAP Q

Analysis index: 22

Analysis name: 046002(178603)jian

Analysis started at: 9/1/2021 4:58:17 PM

User name: WINDOWS-UPCI4ER\Administrator

| Category    | Concentration average | Concentration RSD             |
|-------------|-----------------------|-------------------------------|
| 9Be (KED)   | 0.000 ppb             | 1,567,880,022,109,980,000.0 % |
| 11B (KED)   | 5.414 ppb             | 16.2 %                        |
| 24Mg (KED)  | 419.357 ppb           | 0.9 %                         |
| 27Al (KED)  | 401.693 ppb           | 1.4 %                         |
| 51V (KED)   | 0.722 ppb             | 0.8 %                         |
| 52Cr (KED)  | 3.886 ppb             | 1.6 %                         |
| 55Mn (KED)  | 10.464 ppb            | 0.6 %                         |
| 56Fe (KED)  | 397.314 ppb           | 0.7 %                         |
| 58Ni (KED)  | 2.674 ppb             | 1.4 %                         |
| 59Co (KED)  | 0.217 ppb             | 3.3 %                         |
| 63Cu (KED)  | 14.923 ppb            | 0.4 %                         |
| 64Zn (KED)  | 173.729 ppb           | 0.8 %                         |
| 69Ga (KED)  | 1.282 ppb             | 3.1 %                         |
| 75As (KED)  | 0.708 ppb             | 3.0 %                         |
| 80Se (KED)  | 0.920 ppb             | 22.8 %                        |
| 85Rb (KED)  | 1.942 ppb             | 3.4 %                         |
| 88Sr (KED)  | 4.749 ppb             | 1.8 %                         |
| 107Ag (KED) | 0.106 ppb             | 4.9 %                         |
| 114Cd (KED) | 0.073 ppb             | 1.4 %                         |
| 133Cs (KED) | 0.061 ppb             | 5.3 %                         |
| 138Ba (KED) | 3.648 ppb             | 1.7 %                         |
| 139La (KED) | 0.287 ppb             | 1.6 %                         |
| 140Ce (KED) | 0.595 ppb             | 1.0 %                         |
| 141Pr (KED) | 0.067 ppb             | 1.2 %                         |
| 142Nd (KED) | 0.361 ppb             | 4.4 %                         |
| 152Sm (KED) | 0.053 ppb             | 2.6 %                         |
| 153Eu (KED) | 0.009 ppb             | 5.3 %                         |
| 158Gd (KED) | 0.045 ppb             | 2.6 %                         |
| 164Dy (KED) | 0.031 ppb             | 5.8 %                         |
| 165Ho (KED) | 0.006 ppb             | 2.8 %                         |
| 166Er (KED) | 0.010 ppb             | 7.3 %                         |
| 169Tm (KED) | 0.002 ppb             | 6.2 %                         |
| 174Yb (KED) | 0.012 ppb             | 2.0 %                         |
| 175Lu (KED) | 0.002 ppb             | 13.5 %                        |
| 205Tl (KED) | 0.008 ppb             | 2.6 %                         |
| 208Pb (KED) | 1.421 ppb             | 3.8 %                         |
| 232Th (KED) | 0.064 ppb             | 3.6 %                         |
| 238U (KED)  | 0.023 ppb             | 3.7 %                         |

| Category   | Concentration average | Intensity average | Intensity RSD |
|------------|-----------------------|-------------------|---------------|
| 9Be (KED)  | 0.000 ppb             | 1 cps             | 173.2 %       |
| 11B (KED)  | 5.414 ppb             | 492 cps           | 10.3 %        |
| 24Mg (KED) | 419.357 ppb           | 165,338 cps       | 0.9 %         |
| 27Al (KED) | 401.693 ppb           | 39,817 cps        | 1.3 %         |
| 51V (KED)  | 0.722 ppb             | 4,726 cps         | 0.8 %         |
| 52Cr (KED) | 3.886 ppb             | 39,667 cps        | 1.6 %         |
| 55Mn (KED) | 10.464 ppb            | 52,217 cps        | 0.6 %         |
| 56Fe (KED) | 397.314 ppb           | 3,770,963 cps     | 0.7 %         |
| 58Ni (KED) | 2.674 ppb             | 35,703 cps        | 1.3 %         |
| 59Co (KED) | 0.217 ppb             | 4,352 cps         | 3.3 %         |

| Category    | Concentration average | Intensity average | Intensity RSD |
|-------------|-----------------------|-------------------|---------------|
| 63Cu (KED)  | 14.923 ppb            | 238,828 cps       | 0.4 %         |
| 64Zn (KED)  | 173.729 ppb           | 688,066 cps       | 0.8 %         |
| 69Ga (KED)  | 1.282 ppb             | 6,862 cps         | 2.9 %         |
| 75As (KED)  | 0.708 ppb             | 832 cps           | 2.9 %         |
| 80Se (KED)  | 0.920 ppb             | 1,131 cps         | 6.1 %         |
| 85Rb (KED)  | 1.942 ppb             | 9,308 cps         | 3.4 %         |
| 88Sr (KED)  | 4.749 ppb             | 32,776 cps        | 1.8 %         |
| 107Ag (KED) | 0.106 ppb             | 5,781 cps         | 4.4 %         |
| 114Cd (KED) | 0.073 ppb             | 1,845 cps         | 1.1 %         |
| 133Cs (KED) | 0.061 ppb             | 1,735 cps         | 5.2 %         |
| 138Ba (KED) | 3.648 ppb             | 161,691 cps       | 1.6 %         |
| 139La (KED) | 0.287 ppb             | 23,829 cps        | 1.6 %         |
| 140Ce (KED) | 0.595 ppb             | 66,603 cps        | 1.0 %         |
| 141Pr (KED) | 0.067 ppb             | 7,766 cps         | 1.2 %         |
| 142Nd (KED) | 0.361 ppb             | 17,334 cps        | 4.4 %         |
| 152Sm (KED) | 0.053 ppb             | 2,428 cps         | 2.6 %         |
| 153Eu (KED) | 0.009 ppb             | 844 cps           | 5.2 %         |
| 158Gd (KED) | 0.045 ppb             | 2,888 cps         | 2.6 %         |
| 164Dy (KED) | 0.031 ppb             | 2,264 cps         | 5.8 %         |
| 165Ho (KED) | 0.006 ppb             | 1,459 cps         | 2.8 %         |
| 166Er (KED) | 0.010 ppb             | 1,292 cps         | 4.8 %         |
| 169Tm (KED) | 0.002 ppb             | 593 cps           | 5.9 %         |
| 174Yb (KED) | 0.012 ppb             | 1,262 cps         | 2.0 %         |
| 175Lu (KED) | 0.002 ppb             | 307 cps           | 13.2 %        |
| 205Tl (KED) | 0.008 ppb             | 1,881 cps         | 2.6 %         |
| 208Pb (KED) | 1.421 ppb             | 243,297 cps       | 3.4 %         |
| 232Th (KED) | 0.064 ppb             | 21,298 cps        | 3.4 %         |
| 238U (KED)  | 0.023 ppb             | 8,595 cps         | 3.6 %         |

## Sample Summary

Instrument ID: iCAP Q

Analysis index: 23

Analysis name: 024066(178585)jian

Analysis started at: 9/1/2021 5:01:33 PM

User name: WINDOWS-UPCI4ER\Administrator

| Category    | Concentration average | Concentration RSD |
|-------------|-----------------------|-------------------|
| 9Be (KED)   | 0.010 ppb             | 346.4 %           |
| 11B (KED)   | 6.859 ppb             | 15.7 %            |
| 24Mg (KED)  | 1,114.984 ppb         | 0.9 %             |
| 27Al (KED)  | 1,377.484 ppb         | 1.4 %             |
| 51V (KED)   | 2.605 ppb             | 3.7 %             |
| 52Cr (KED)  | 5.871 ppb             | 0.1 %             |
| 55Mn (KED)  | 34.072 ppb            | 0.2 %             |
| 56Fe (KED)  | 1,407.997 ppb         | 1.2 %             |
| 58Ni (KED)  | 6.191 ppb             | 0.8 %             |
| 59Co (KED)  | 0.709 ppb             | 3.5 %             |
| 63Cu (KED)  | 11.689 ppb            | 1.8 %             |
| 64Zn (KED)  | 160.001 ppb           | 0.8 %             |
| 69Ga (KED)  | 2.928 ppb             | 2.4 %             |
| 75As (KED)  | 0.838 ppb             | 7.1 %             |
| 80Se (KED)  | 1.817 ppb             | 16.8 %            |
| 85Rb (KED)  | 3.614 ppb             | 1.3 %             |
| 88Sr (KED)  | 12.703 ppb            | 2.2 %             |
| 107Ag (KED) | 0.046 ppb             | 6.9 %             |
| 114Cd (KED) | 0.126 ppb             | 3.6 %             |
| 133Cs (KED) | 0.237 ppb             | 0.7 %             |
| 138Ba (KED) | 8.076 ppb             | 2.5 %             |
| 139La (KED) | 0.963 ppb             | 1.1 %             |
| 140Ce (KED) | 2.059 ppb             | 1.2 %             |
| 141Pr (KED) | 0.238 ppb             | 1.8 %             |
| 142Nd (KED) | 1.253 ppb             | 3.2 %             |
| 152Sm (KED) | 0.171 ppb             | 0.7 %             |
| 153Eu (KED) | 0.032 ppb             | 3.7 %             |
| 158Gd (KED) | 0.154 ppb             | 2.0 %             |
| 164Dy (KED) | 0.106 ppb             | 1.2 %             |
| 165Ho (KED) | 0.021 ppb             | 4.2 %             |
| 166Er (KED) | 0.048 ppb             | 4.3 %             |
| 169Tm (KED) | 0.007 ppb             | 4.2 %             |
| 174Yb (KED) | 0.044 ppb             | 2.2 %             |
| 175Lu (KED) | 0.006 ppb             | 8.0 %             |
| 205Tl (KED) | 0.015 ppb             | 5.8 %             |
| 208Pb (KED) | 1.579 ppb             | 0.6 %             |
| 232Th (KED) | 0.247 ppb             | 1.1 %             |
| 238U (KED)  | 0.064 ppb             | 2.9 %             |

| Category   | Concentration average | Intensity average | Intensity RSD |
|------------|-----------------------|-------------------|---------------|
| 9Be (KED)  | 0.010 ppb             | 2 cps             | 173.2 %       |
| 11B (KED)  | 6.859 ppb             | 576 cps           | 10.8 %        |
| 24Mg (KED) | 1,114.984 ppb         | 438,535 cps       | 0.9 %         |
| 27Al (KED) | 1,377.484 ppb         | 136,278 cps       | 1.4 %         |
| 51V (KED)  | 2.605 ppb             | 17,023 cps        | 3.7 %         |
| 52Cr (KED) | 5.871 ppb             | 59,796 cps        | 0.1 %         |
| 55Mn (KED) | 34.072 ppb            | 169,475 cps       | 0.2 %         |
| 56Fe (KED) | 1,407.997 ppb         | 13,344,012 cps    | 1.2 %         |
| 58Ni (KED) | 6.191 ppb             | 78,835 cps        | 0.8 %         |
| 59Co (KED) | 0.709 ppb             | 14,203 cps        | 3.5 %         |

| Category    | Concentration average | Intensity average | Intensity RSD |
|-------------|-----------------------|-------------------|---------------|
| 63Cu (KED)  | 11.689 ppb            | 189,252 cps       | 1.7 %         |
| 64Zn (KED)  | 160.001 ppb           | 634,327 cps       | 0.8 %         |
| 69Ga (KED)  | 2.928 ppb             | 15,045 cps        | 2.3 %         |
| 75As (KED)  | 0.838 ppb             | 980 cps           | 6.8 %         |
| 80Se (KED)  | 1.817 ppb             | 1,428 cps         | 7.1 %         |
| 85Rb (KED)  | 3.614 ppb             | 17,261 cps        | 1.3 %         |
| 88Sr (KED)  | 12.703 ppb            | 87,205 cps        | 2.2 %         |
| 107Ag (KED) | 0.046 ppb             | 2,826 cps         | 5.6 %         |
| 114Cd (KED) | 0.126 ppb             | 2,837 cps         | 3.0 %         |
| 133Cs (KED) | 0.237 ppb             | 6,643 cps         | 0.7 %         |
| 138Ba (KED) | 8.076 ppb             | 339,584 cps       | 2.4 %         |
| 139La (KED) | 0.963 ppb             | 79,897 cps        | 1.1 %         |
| 140Ce (KED) | 2.059 ppb             | 229,937 cps       | 1.2 %         |
| 141Pr (KED) | 0.238 ppb             | 27,514 cps        | 1.8 %         |
| 142Nd (KED) | 1.253 ppb             | 60,089 cps        | 3.2 %         |
| 152Sm (KED) | 0.171 ppb             | 7,740 cps         | 0.7 %         |
| 153Eu (KED) | 0.032 ppb             | 2,890 cps         | 3.7 %         |
| 158Gd (KED) | 0.154 ppb             | 9,834 cps         | 2.0 %         |
| 164Dy (KED) | 0.106 ppb             | 7,602 cps         | 1.2 %         |
| 165Ho (KED) | 0.021 ppb             | 5,196 cps         | 4.2 %         |
| 166Er (KED) | 0.048 ppb             | 4,671 cps         | 3.9 %         |
| 169Tm (KED) | 0.007 ppb             | 2,027 cps         | 4.2 %         |
| 174Yb (KED) | 0.044 ppb             | 4,651 cps         | 2.2 %         |
| 175Lu (KED) | 0.006 ppb             | 1,038 cps         | 7.9 %         |
| 205Tl (KED) | 0.015 ppb             | 3,324 cps         | 5.8 %         |
| 208Pb (KED) | 1.579 ppb             | 268,221 cps       | 0.6 %         |
| 232Th (KED) | 0.247 ppb             | 78,403 cps        | 1.1 %         |
| 238U (KED)  | 0.064 ppb             | 23,461 cps        | 2.9 %         |

## Sample Summary

Instrument ID: iCAP Q

Analysis index: 24

Analysis name: 015366(178647)jian

Analysis started at: 9/1/2021 5:04:50 PM

User name: WINDOWS-UPCI4ER\Administrator

| Category    | Concentration average | Concentration RSD |
|-------------|-----------------------|-------------------|
| 9Be (KED)   | 0.020 ppb             | 150.0 %           |
| 11B (KED)   | 3.584 ppb             | 27.1 %            |
| 24Mg (KED)  | 507.006 ppb           | 0.4 %             |
| 27Al (KED)  | 599.874 ppb           | 0.9 %             |
| 51V (KED)   | 1.063 ppb             | 3.2 %             |
| 52Cr (KED)  | 3.973 ppb             | 2.3 %             |
| 55Mn (KED)  | 15.462 ppb            | 1.9 %             |
| 56Fe (KED)  | 535.750 ppb           | 2.1 %             |
| 58Ni (KED)  | 2.683 ppb             | 0.7 %             |
| 59Co (KED)  | 0.292 ppb             | 1.8 %             |
| 63Cu (KED)  | 10.606 ppb            | 0.8 %             |
| 64Zn (KED)  | 172.178 ppb           | 0.6 %             |
| 69Ga (KED)  | 1.346 ppb             | 4.4 %             |
| 75As (KED)  | 0.542 ppb             | 3.0 %             |
| 80Se (KED)  | 1.035 ppb             | 26.3 %            |
| 85Rb (KED)  | 1.535 ppb             | 2.2 %             |
| 88Sr (KED)  | 6.149 ppb             | 0.5 %             |
| 107Ag (KED) | 0.048 ppb             | 2.1 %             |
| 114Cd (KED) | 0.089 ppb             | 0.3 %             |
| 133Cs (KED) | 0.093 ppb             | 7.2 %             |
| 138Ba (KED) | 3.888 ppb             | 2.1 %             |
| 139La (KED) | 0.344 ppb             | 2.1 %             |
| 140Ce (KED) | 0.713 ppb             | 1.4 %             |
| 141Pr (KED) | 0.082 ppb             | 4.1 %             |
| 142Nd (KED) | 0.435 ppb             | 1.5 %             |
| 152Sm (KED) | 0.062 ppb             | 8.1 %             |
| 153Eu (KED) | 0.013 ppb             | 7.2 %             |
| 158Gd (KED) | 0.057 ppb             | 2.0 %             |
| 164Dy (KED) | 0.042 ppb             | 2.1 %             |
| 165Ho (KED) | 0.008 ppb             | 4.6 %             |
| 166Er (KED) | 0.015 ppb             | 3.7 %             |
| 169Tm (KED) | 0.003 ppb             | 7.7 %             |
| 174Yb (KED) | 0.016 ppb             | 2.7 %             |
| 175Lu (KED) | 0.002 ppb             | 8.3 %             |
| 205Tl (KED) | 0.011 ppb             | 4.3 %             |
| 208Pb (KED) | 0.721 ppb             | 1.3 %             |
| 232Th (KED) | 0.098 ppb             | 2.3 %             |
| 238U (KED)  | 0.028 ppb             | 0.4 %             |

| Category   | Concentration average | Intensity average | Intensity RSD |
|------------|-----------------------|-------------------|---------------|
| 9Be (KED)  | 0.020 ppb             | 3 cps             | 100.0 %       |
| 11B (KED)  | 3.584 ppb             | 387 cps           | 14.5 %        |
| 24Mg (KED) | 507.006 ppb           | 199,761 cps       | 0.4 %         |
| 27Al (KED) | 599.874 ppb           | 59,408 cps        | 0.9 %         |
| 51V (KED)  | 1.063 ppb             | 6,951 cps         | 3.2 %         |
| 52Cr (KED) | 3.973 ppb             | 40,550 cps        | 2.3 %         |
| 55Mn (KED) | 15.462 ppb            | 77,042 cps        | 1.8 %         |
| 56Fe (KED) | 535.750 ppb           | 5,082,214 cps     | 2.1 %         |
| 58Ni (KED) | 2.683 ppb             | 35,817 cps        | 0.6 %         |
| 59Co (KED) | 0.292 ppb             | 5,854 cps         | 1.7 %         |

| Category    | Concentration average | Intensity average | Intensity RSD |
|-------------|-----------------------|-------------------|---------------|
| 63Cu (KED)  | 10.606 ppb            | 172,659 cps       | 0.8 %         |
| 64Zn (KED)  | 172.178 ppb           | 681,995 cps       | 0.6 %         |
| 69Ga (KED)  | 1.346 ppb             | 7,183 cps         | 4.1 %         |
| 75As (KED)  | 0.542 ppb             | 644 cps           | 2.8 %         |
| 80Se (KED)  | 1.035 ppb             | 1,169 cps         | 7.7 %         |
| 85Rb (KED)  | 1.535 ppb             | 7,376 cps         | 2.2 %         |
| 88Sr (KED)  | 6.149 ppb             | 42,358 cps        | 0.5 %         |
| 107Ag (KED) | 0.048 ppb             | 2,936 cps         | 1.7 %         |
| 114Cd (KED) | 0.089 ppb             | 2,150 cps         | 0.3 %         |
| 133Cs (KED) | 0.093 ppb             | 2,626 cps         | 7.1 %         |
| 138Ba (KED) | 3.888 ppb             | 171,333 cps       | 1.9 %         |
| 139La (KED) | 0.344 ppb             | 28,544 cps        | 2.1 %         |
| 140Ce (KED) | 0.713 ppb             | 79,674 cps        | 1.4 %         |
| 141Pr (KED) | 0.082 ppb             | 9,491 cps         | 4.1 %         |
| 142Nd (KED) | 0.435 ppb             | 20,911 cps        | 1.5 %         |
| 152Sm (KED) | 0.062 ppb             | 2,805 cps         | 8.0 %         |
| 153Eu (KED) | 0.013 ppb             | 1,176 cps         | 7.1 %         |
| 158Gd (KED) | 0.057 ppb             | 3,667 cps         | 2.0 %         |
| 164Dy (KED) | 0.042 ppb             | 2,994 cps         | 2.1 %         |
| 165Ho (KED) | 0.008 ppb             | 1,982 cps         | 4.6 %         |
| 166Er (KED) | 0.015 ppb             | 1,753 cps         | 2.7 %         |
| 169Tm (KED) | 0.003 ppb             | 778 cps           | 7.5 %         |
| 174Yb (KED) | 0.016 ppb             | 1,733 cps         | 2.7 %         |
| 175Lu (KED) | 0.002 ppb             | 348 cps           | 8.2 %         |
| 205Tl (KED) | 0.011 ppb             | 2,380 cps         | 4.3 %         |
| 208Pb (KED) | 0.721 ppb             | 133,121 cps       | 1.1 %         |
| 232Th (KED) | 0.098 ppb             | 31,958 cps        | 2.2 %         |
| 238U (KED)  | 0.028 ppb             | 10,329 cps        | 0.4 %         |

## Sample Summary

Instrument ID: iCAP Q

Analysis index: 25

Analysis name: 04380(178516)jian

Analysis started at: 9/1/2021 5:07:51 PM

User name: WINDOWS-UPCI4ER\Administrator

| Category    | Concentration average | Concentration RSD |
|-------------|-----------------------|-------------------|
| 9Be (KED)   | 0.041 ppb             | 86.6 %            |
| 11B (KED)   | 5.800 ppb             | 17.0 %            |
| 24Mg (KED)  | 1,105.846 ppb         | 1.1 %             |
| 27Al (KED)  | 1,307.351 ppb         | 1.1 %             |
| 51V (KED)   | 2.526 ppb             | 1.6 %             |
| 52Cr (KED)  | 3.859 ppb             | 1.2 %             |
| 55Mn (KED)  | 34.683 ppb            | 0.5 %             |
| 56Fe (KED)  | 1,332.082 ppb         | 0.7 %             |
| 58Ni (KED)  | 6.187 ppb             | 1.1 %             |
| 59Co (KED)  | 0.658 ppb             | 2.3 %             |
| 63Cu (KED)  | 13.033 ppb            | 1.3 %             |
| 64Zn (KED)  | 164.396 ppb           | 1.2 %             |
| 69Ga (KED)  | 2.816 ppb             | 2.2 %             |
| 75As (KED)  | 0.796 ppb             | 1.3 %             |
| 80Se (KED)  | 0.930 ppb             | 26.0 %            |
| 85Rb (KED)  | 2.935 ppb             | 1.1 %             |
| 88Sr (KED)  | 13.242 ppb            | 0.6 %             |
| 107Ag (KED) | 0.023 ppb             | 9.1 %             |
| 114Cd (KED) | 0.071 ppb             | 1.0 %             |
| 133Cs (KED) | 0.249 ppb             | 0.7 %             |
| 138Ba (KED) | 8.415 ppb             | 2.0 %             |
| 139La (KED) | 1.062 ppb             | 0.7 %             |
| 140Ce (KED) | 2.143 ppb             | 0.7 %             |
| 141Pr (KED) | 0.253 ppb             | 1.4 %             |
| 142Nd (KED) | 1.315 ppb             | 0.9 %             |
| 152Sm (KED) | 0.185 ppb             | 2.1 %             |
| 153Eu (KED) | 0.032 ppb             | 1.2 %             |
| 158Gd (KED) | 0.160 ppb             | 2.2 %             |
| 164Dy (KED) | 0.113 ppb             | 3.8 %             |
| 165Ho (KED) | 0.021 ppb             | 2.2 %             |
| 166Er (KED) | 0.050 ppb             | 7.6 %             |
| 169Tm (KED) | 0.007 ppb             | 3.7 %             |
| 174Yb (KED) | 0.043 ppb             | 1.2 %             |
| 175Lu (KED) | 0.006 ppb             | 5.7 %             |
| 205Tl (KED) | 0.017 ppb             | 1.8 %             |
| 208Pb (KED) | 1.086 ppb             | 1.9 %             |
| 232Th (KED) | 0.328 ppb             | 1.6 %             |
| 238U (KED)  | 0.069 ppb             | 1.4 %             |

| Category   | Concentration average | Intensity average | Intensity RSD |
|------------|-----------------------|-------------------|---------------|
| 9Be (KED)  | 0.041 ppb             | 6 cps             | 69.3 %        |
| 11B (KED)  | 5.800 ppb             | 514 cps           | 11.1 %        |
| 24Mg (KED) | 1,105.846 ppb         | 434,946 cps       | 1.1 %         |
| 27Al (KED) | 1,307.351 ppb         | 129,345 cps       | 1.1 %         |
| 51V (KED)  | 2.526 ppb             | 16,506 cps        | 1.6 %         |
| 52Cr (KED) | 3.859 ppb             | 39,397 cps        | 1.2 %         |
| 55Mn (KED) | 34.683 ppb            | 172,514 cps       | 0.5 %         |
| 56Fe (KED) | 1,332.082 ppb         | 12,624,949 cps    | 0.7 %         |
| 58Ni (KED) | 6.187 ppb             | 78,780 cps        | 1.1 %         |
| 59Co (KED) | 0.658 ppb             | 13,181 cps        | 2.3 %         |

| Category    | Concentration average | Intensity average | Intensity RSD |
|-------------|-----------------------|-------------------|---------------|
| 63Cu (KED)  | 13.033 ppb            | 209,856 cps       | 1.2 %         |
| 64Zn (KED)  | 164.396 ppb           | 651,533 cps       | 1.2 %         |
| 69Ga (KED)  | 2.816 ppb             | 14,487 cps        | 2.1 %         |
| 75As (KED)  | 0.796 ppb             | 932 cps           | 1.3 %         |
| 80Se (KED)  | 0.930 ppb             | 1,134 cps         | 7.1 %         |
| 85Rb (KED)  | 2.935 ppb             | 14,030 cps        | 1.1 %         |
| 88Sr (KED)  | 13.242 ppb            | 90,897 cps        | 0.6 %         |
| 107Ag (KED) | 0.023 ppb             | 1,671 cps         | 6.2 %         |
| 114Cd (KED) | 0.071 ppb             | 1,818 cps         | 0.7 %         |
| 133Cs (KED) | 0.249 ppb             | 6,956 cps         | 0.7 %         |
| 138Ba (KED) | 8.415 ppb             | 353,201 cps       | 1.9 %         |
| 139La (KED) | 1.062 ppb             | 88,149 cps        | 0.7 %         |
| 140Ce (KED) | 2.143 ppb             | 239,244 cps       | 0.7 %         |
| 141Pr (KED) | 0.253 ppb             | 29,309 cps        | 1.4 %         |
| 142Nd (KED) | 1.315 ppb             | 63,080 cps        | 0.9 %         |
| 152Sm (KED) | 0.185 ppb             | 8,391 cps         | 2.1 %         |
| 153Eu (KED) | 0.032 ppb             | 2,915 cps         | 1.2 %         |
| 158Gd (KED) | 0.160 ppb             | 10,246 cps        | 2.2 %         |
| 164Dy (KED) | 0.113 ppb             | 8,089 cps         | 3.7 %         |
| 165Ho (KED) | 0.021 ppb             | 5,271 cps         | 2.2 %         |
| 166Er (KED) | 0.050 ppb             | 4,810 cps         | 6.9 %         |
| 169Tm (KED) | 0.007 ppb             | 2,099 cps         | 3.6 %         |
| 174Yb (KED) | 0.043 ppb             | 4,612 cps         | 1.2 %         |
| 175Lu (KED) | 0.006 ppb             | 1,010 cps         | 5.6 %         |
| 205Tl (KED) | 0.017 ppb             | 3,825 cps         | 1.8 %         |
| 208Pb (KED) | 1.086 ppb             | 190,645 cps       | 1.7 %         |
| 232Th (KED) | 0.328 ppb             | 103,596 cps       | 1.6 %         |
| 238U (KED)  | 0.069 ppb             | 25,609 cps        | 1.4 %         |

## Sample Summary

Instrument ID: iCAP Q

Analysis index: 26

Analysis name: 034758(179419)jian

Analysis started at: 9/1/2021 5:11:01 PM

User name: WINDOWS-UPCI4ER\Administrator

| Category    | Concentration average | Concentration RSD |
|-------------|-----------------------|-------------------|
| 9Be (KED)   | 0.020 ppb             | 150.0 %           |
| 11B (KED)   | 3.834 ppb             | 3.1 %             |
| 24Mg (KED)  | 543.882 ppb           | 1.1 %             |
| 27Al (KED)  | 646.015 ppb           | 1.9 %             |
| 51V (KED)   | 1.135 ppb             | 2.4 %             |
| 52Cr (KED)  | 4.932 ppb             | 2.0 %             |
| 55Mn (KED)  | 16.846 ppb            | 2.4 %             |
| 56Fe (KED)  | 598.065 ppb           | 1.3 %             |
| 58Ni (KED)  | 3.120 ppb             | 1.1 %             |
| 59Co (KED)  | 0.289 ppb             | 2.0 %             |
| 63Cu (KED)  | 10.247 ppb            | 0.1 %             |
| 64Zn (KED)  | 170.966 ppb           | 0.5 %             |
| 69Ga (KED)  | 1.405 ppb             | 1.0 %             |
| 75As (KED)  | 0.397 ppb             | 7.8 %             |
| 80Se (KED)  | 1.072 ppb             | 15.8 %            |
| 85Rb (KED)  | 1.908 ppb             | 6.2 %             |
| 88Sr (KED)  | 6.908 ppb             | 0.5 %             |
| 107Ag (KED) | 0.015 ppb             | 6.1 %             |
| 114Cd (KED) | 0.070 ppb             | 7.3 %             |
| 133Cs (KED) | 0.105 ppb             | 4.9 %             |
| 138Ba (KED) | 4.306 ppb             | 0.6 %             |
| 139La (KED) | 0.388 ppb             | 2.1 %             |
| 140Ce (KED) | 0.812 ppb             | 1.1 %             |
| 141Pr (KED) | 0.095 ppb             | 1.1 %             |
| 142Nd (KED) | 0.508 ppb             | 2.6 %             |
| 152Sm (KED) | 0.072 ppb             | 3.9 %             |
| 153Eu (KED) | 0.015 ppb             | 4.1 %             |
| 158Gd (KED) | 0.066 ppb             | 3.3 %             |
| 164Dy (KED) | 0.046 ppb             | 5.6 %             |
| 165Ho (KED) | 0.009 ppb             | 9.8 %             |
| 166Er (KED) | 0.020 ppb             | 2.6 %             |
| 169Tm (KED) | 0.003 ppb             | 6.7 %             |
| 174Yb (KED) | 0.019 ppb             | 3.5 %             |
| 175Lu (KED) | 0.002 ppb             | 7.5 %             |
| 205Tl (KED) | 0.011 ppb             | 4.9 %             |
| 208Pb (KED) | 0.771 ppb             | 0.7 %             |
| 232Th (KED) | 0.111 ppb             | 2.7 %             |
| 238U (KED)  | 0.031 ppb             | 2.3 %             |

| Category   | Concentration average | Intensity average | Intensity RSD |
|------------|-----------------------|-------------------|---------------|
| 9Be (KED)  | 0.020 ppb             | 3 cps             | 100.0 %       |
| 11B (KED)  | 3.834 ppb             | 401 cps           | 1.7 %         |
| 24Mg (KED) | 543.882 ppb           | 214,243 cps       | 1.1 %         |
| 27Al (KED) | 646.015 ppb           | 63,969 cps        | 1.9 %         |
| 51V (KED)  | 1.135 ppb             | 7,423 cps         | 2.4 %         |
| 52Cr (KED) | 4.932 ppb             | 50,273 cps        | 2.0 %         |
| 55Mn (KED) | 16.846 ppb            | 83,917 cps        | 2.4 %         |
| 56Fe (KED) | 598.065 ppb           | 5,672,452 cps     | 1.3 %         |
| 58Ni (KED) | 3.120 ppb             | 41,180 cps        | 1.0 %         |
| 59Co (KED) | 0.289 ppb             | 5,800 cps         | 2.0 %         |

| Category    | Concentration average | Intensity average | Intensity RSD |
|-------------|-----------------------|-------------------|---------------|
| 63Cu (KED)  | 10.247 ppb            | 167,164 cps       | 0.1 %         |
| 64Zn (KED)  | 170.966 ppb           | 677,250 cps       | 0.5 %         |
| 69Ga (KED)  | 1.405 ppb             | 7,476 cps         | 0.9 %         |
| 75As (KED)  | 0.397 ppb             | 480 cps           | 7.3 %         |
| 80Se (KED)  | 1.072 ppb             | 1,181 cps         | 4.7 %         |
| 85Rb (KED)  | 1.908 ppb             | 9,147 cps         | 6.2 %         |
| 88Sr (KED)  | 6.908 ppb             | 47,555 cps        | 0.5 %         |
| 107Ag (KED) | 0.015 ppb             | 1,291 cps         | 3.6 %         |
| 114Cd (KED) | 0.070 ppb             | 1,797 cps         | 5.3 %         |
| 133Cs (KED) | 0.105 ppb             | 2,955 cps         | 4.8 %         |
| 138Ba (KED) | 4.306 ppb             | 188,122 cps       | 0.5 %         |
| 139La (KED) | 0.388 ppb             | 32,199 cps        | 2.1 %         |
| 140Ce (KED) | 0.812 ppb             | 90,775 cps        | 1.1 %         |
| 141Pr (KED) | 0.095 ppb             | 10,987 cps        | 1.1 %         |
| 142Nd (KED) | 0.508 ppb             | 24,397 cps        | 2.6 %         |
| 152Sm (KED) | 0.072 ppb             | 3,288 cps         | 3.9 %         |
| 153Eu (KED) | 0.015 ppb             | 1,340 cps         | 4.0 %         |
| 158Gd (KED) | 0.066 ppb             | 4,210 cps         | 3.3 %         |
| 164Dy (KED) | 0.046 ppb             | 3,287 cps         | 5.6 %         |
| 165Ho (KED) | 0.009 ppb             | 2,140 cps         | 9.7 %         |
| 166Er (KED) | 0.020 ppb             | 2,161 cps         | 2.1 %         |
| 169Tm (KED) | 0.003 ppb             | 904 cps           | 6.6 %         |
| 174Yb (KED) | 0.019 ppb             | 2,047 cps         | 3.5 %         |
| 175Lu (KED) | 0.002 ppb             | 428 cps           | 7.4 %         |
| 205Tl (KED) | 0.011 ppb             | 2,391 cps         | 4.8 %         |
| 208Pb (KED) | 0.771 ppb             | 141,080 cps       | 0.6 %         |
| 232Th (KED) | 0.111 ppb             | 35,984 cps        | 2.6 %         |
| 238U (KED)  | 0.031 ppb             | 11,434 cps        | 2.2 %         |
