# Supplementary material for: Geographic and breed-specific traceability of cashmere via mineral element profiling in Inner Mongolia (Ordos, Chifeng, and Alxa League)
Source: Royal Society of Chemistry journal article supplement (doi:10.1039/d5ra08122j), 2026-01-01
Supplement: d5ra08122j1.zip [file 20210902-a you qi ya bu lai 2+a zuo qi zha de gai 16+a zuo qi yin gen su mu cha gan zha de gai 2.pdf › ԭʼ޿/20210902-a you qi ya bu lai 2+a zuo qi zha de gai 16+a zuo qi yin gen su mu cha gan zha de gai 2.pdf]

## Instrument Summary:

Instrument ID: iCAP Q  
Serial Number: Undefined

## Labbook Summary:

Path and filename: \_Application Data\Workspace\LabBooks\wlw\20210902-1.imexp  
Labbook created by: Administrator  
Based on template:  
Hardware configuration: iCAPQ1  
Labbook type: eQuant  
Qtegra version (last saved): 2.7.2425.154  
Labbook started: 9/2/2021 4:16:40 PM  
Labbook finished: 9/2/2021 5:36:35 PM

## Method Summary:

| Isotope     | Mode | Dwell time (s) | # of Channels | Spacing | Resolution | IS          |
|-------------|------|----------------|---------------|---------|------------|-------------|
| 6Li (KED)   | KED  | 0.03           | 3             | 0.1     | Normal     |             |
| 9Be (KED)   | KED  | 0.03           | 3             | 0.1     | Normal     | 6Li (KED)   |
| 11B (KED)   | KED  | 0.03           | 3             | 0.1     | Normal     | 6Li (KED)   |
| 24Mg (KED)  | KED  | 0.03           | 3             | 0.1     | Normal     | 6Li (KED)   |
| 27Al (KED)  | KED  | 0.03           | 3             | 0.1     | Normal     | 45Sc (KED)  |
| 45Sc (KED)  | KED  | 0.03           | 3             | 0.1     | Normal     |             |
| 51V (KED)   | KED  | 0.03           | 3             | 0.1     | Normal     | 45Sc (KED)  |
| 52Cr (KED)  | KED  | 0.03           | 3             | 0.1     | Normal     | 45Sc (KED)  |
| 55Mn (KED)  | KED  | 0.03           | 3             | 0.1     | Normal     | 45Sc (KED)  |
| 56Fe (KED)  | KED  | 0.03           | 3             | 0.1     | Normal     | 45Sc (KED)  |
| 58Ni (KED)  | KED  | 0.03           | 3             | 0.1     | Normal     | 45Sc (KED)  |
| 59Co (KED)  | KED  | 0.03           | 3             | 0.1     | Normal     | 45Sc (KED)  |
| 63Cu (KED)  | KED  | 0.03           | 3             | 0.1     | Normal     | 89Y (KED)   |
| 64Zn (KED)  | KED  | 0.03           | 3             | 0.1     | Normal     | 89Y (KED)   |
| 69Ga (KED)  | KED  | 0.03           | 3             | 0.1     | Normal     | 89Y (KED)   |
| 75As (KED)  | KED  | 0.03           | 3             | 0.1     | Normal     | 89Y (KED)   |
| 80Se (KED)  | KED  | 0.03           | 3             | 0.1     | Normal     | 89Y (KED)   |
| 85Rb (KED)  | KED  | 0.03           | 3             | 0.1     | Normal     | 89Y (KED)   |
| 88Sr (KED)  | KED  | 0.03           | 3             | 0.1     | Normal     | 89Y (KED)   |
| 89Y (KED)   | KED  | 0.03           | 3             | 0.1     | Normal     |             |
| 107Ag (KED) | KED  | 0.03           | 3             | 0.1     | Normal     | 115In (KED) |
| 114Cd (KED) | KED  | 0.03           | 3             | 0.1     | Normal     | 115In (KED) |
| 115In (KED) | KED  | 0.03           | 3             | 0.1     | Normal     |             |
| 133Cs (KED) | KED  | 0.03           | 3             | 0.1     | Normal     | 115In (KED) |
| 138Ba (KED) | KED  | 0.03           | 3             | 0.1     | Normal     | 159Tb (KED) |
| 139La (KED) | KED  | 0.03           | 3             | 0.1     | Normal     | 159Tb (KED) |
| 140Ce (KED) | KED  | 0.03           | 3             | 0.1     | Normal     | 159Tb (KED) |
| 141Pr (KED) | KED  | 0.03           | 3             | 0.1     | Normal     | 159Tb (KED) |
| 142Nd (KED) | KED  | 0.03           | 3             | 0.1     | Normal     | 159Tb (KED) |
| 152Sm (KED) | KED  | 0.03           | 3             | 0.1     | Normal     | 159Tb (KED) |
| 153Eu (KED) | KED  | 0.03           | 3             | 0.1     | Normal     | 159Tb (KED) |
| 158Gd (KED) | KED  | 0.03           | 3             | 0.1     | Normal     | 159Tb (KED) |
| 159Tb (KED) | KED  | 0.03           | 3             | 0.1     | Normal     |             |
| 164Dy (KED) | KED  | 0.03           | 3             | 0.1     | Normal     | 159Tb (KED) |
| 166Er (KED) | KED  | 0.03           | 3             | 0.1     | Normal     | 159Tb (KED) |
| 169Tm (KED) | KED  | 0.03           | 3             | 0.1     | Normal     | 159Tb (KED) |
| 174Yb (KED) | KED  | 0.03           | 3             | 0.1     | Normal     | 159Tb (KED) |
| 175Lu (KED) | KED  | 0.03           | 3             | 0.1     | Normal     | 159Tb (KED) |
| 205Tl (KED) | KED  | 0.03           | 3             | 0.1     | Normal     | 209Bi (KED) |
| 208Pb (KED) | KED  | 0.03           | 3             | 0.1     | Normal     | 209Bi (KED) |
| 209Bi (KED) | KED  | 0.03           | 3             | 0.1     | Normal     |             |
| 232Th (KED) | KED  | 0.03           | 3             | 0.1     | Normal     | 209Bi (KED) |
| 238U (KED)  | KED  | 0.03           | 3             | 0.1     | Normal     | 209Bi (KED) |

| Isotope     | Mode | Dwell time (s) | # of Channels | Spacing | Resolution |
|-------------|------|----------------|---------------|---------|------------|
| 6Li (KED)   | KED  | 0.03           | 3             | 0.1     | Normal     |
| 45Sc (KED)  | KED  | 0.03           | 3             | 0.1     | Normal     |
| 89Y (KED)   | KED  | 0.03           | 3             | 0.1     | Normal     |
| 115In (KED) | KED  | 0.03           | 3             | 0.1     | Normal     |
| 159Tb (KED) | KED  | 0.03           | 3             | 0.1     | Normal     |
| 209Bi (KED) | KED  | 0.03           | 3             | 0.1     | Normal     |

| No. of sweeps | Time per sweep[s] | Time per main run[s] |
|---------------|-------------------|----------------------|
| 10            | 3.87              | 38.7                 |

## Calibration Curves:

9Be (KED)

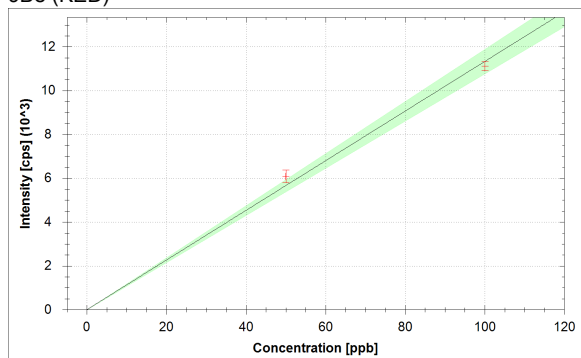

$$f(x) = 113.2724 \cdot x + 1.1143$$

$$R^2 = 0.9964$$

$$\text{BEC} = 0.010 \text{ ppb}$$

$$\text{LoD} = 0.0511 \text{ ppb}$$

11B (KED)

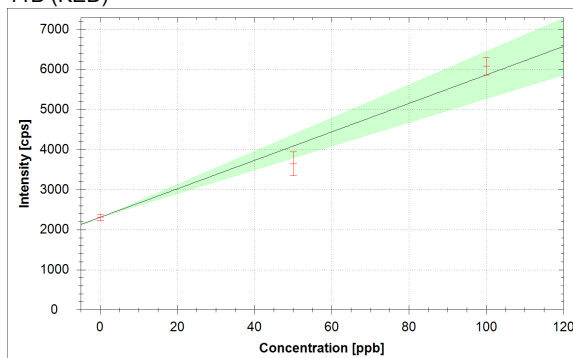

$$f(x) = 35.5351 \cdot x + 2308.1174$$

$$R^2 = 0.9665$$

$$\text{BEC} = 64.953 \text{ ppb}$$

$$\text{LoD} = 6.3010 \text{ ppb}$$

24Mg (KED)

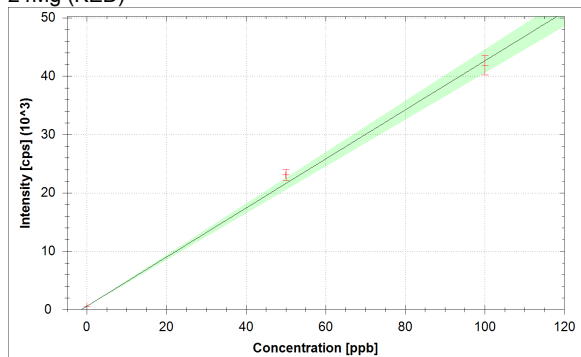

$$f(x) = 420.2140 \cdot x + 576.6735$$

$$R^2 = 0.9968$$

$$\text{BEC} = 1.372 \text{ ppb}$$

$$\text{LoD} = 0.2161 \text{ ppb}$$

27Al (KED)

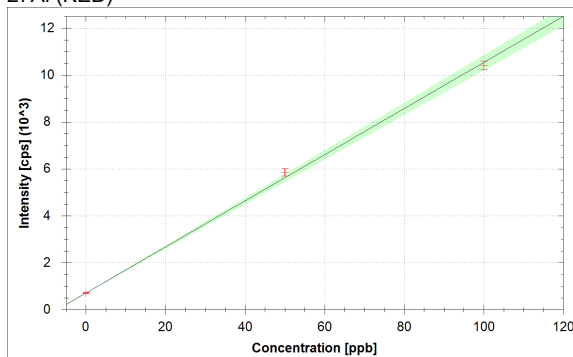

$$f(x) = 98.3384 \cdot x + 703.4215$$

$$R^2 = 0.9985$$

$$\text{BEC} = 7.153 \text{ ppb}$$

$$\text{LoD} = 1.1748 \text{ ppb}$$

51V (KED)

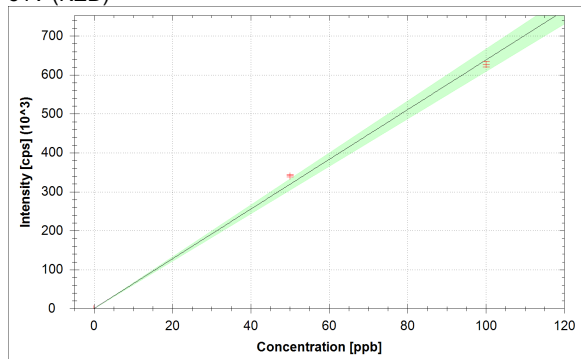

$$f(x) = 6381.7349 \cdot x + 77.9697$$

$$R^2 = 0.9970$$

$$\text{BEC} = 0.012 \text{ ppb}$$

$$\text{LoD} = 0.0084 \text{ ppb}$$

52Cr (KED)

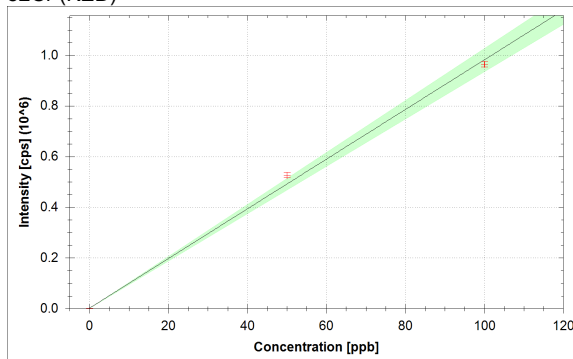

$$f(x) = 9803.6240 \cdot x + 1501.9397$$

$$R^2 = 0.9968$$

$$\text{BEC} = 0.153 \text{ ppb}$$

$$\text{LoD} = 0.0195 \text{ ppb}$$

55Mn (KED)

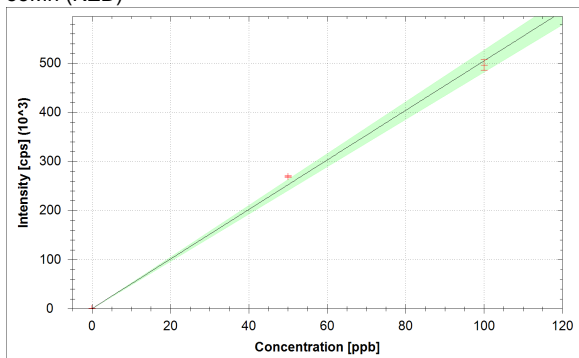

$$f(x) = 5043.7126 \cdot x + 240.1792$$

$$R^2 = 0.9971$$

$$\text{BEC} = 0.048 \text{ ppb}$$

$$\text{LoD} = 0.0121 \text{ ppb}$$

56Fe (KED)

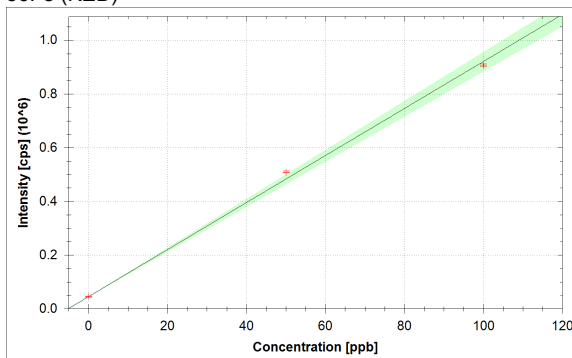

$$f(x) = 8757.7509 \cdot x + 44916.9182$$

$$R^2 = 0.9977$$

$$\text{BEC} = 5.129 \text{ ppb}$$

$$\text{LoD} = 0.5538 \text{ ppb}$$

58Ni (KED)

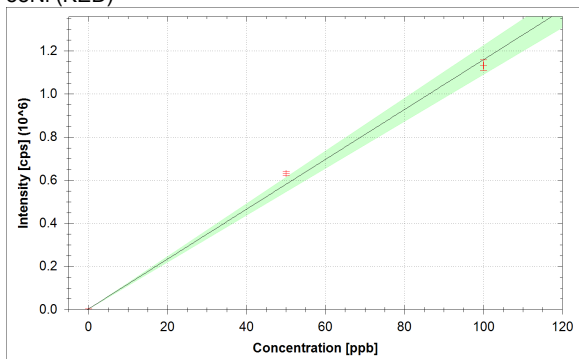

$$f(x) = 11556.8772 \cdot x + 2726.1090$$

$$R^2 = 0.9950$$

$$\text{BEC} = 0.236 \text{ ppb}$$

$$\text{LoD} = 0.0062 \text{ ppb}$$

59Co (KED)

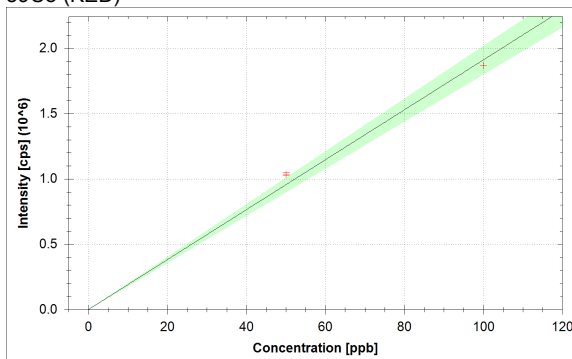

$$f(x) = 19101.9139 \cdot x + 163.2418$$

$$R^2 = 0.9953$$

$$\text{BEC} = 0.009 \text{ ppb}$$

$$\text{LoD} = 0.0054 \text{ ppb}$$

63Cu (KED)

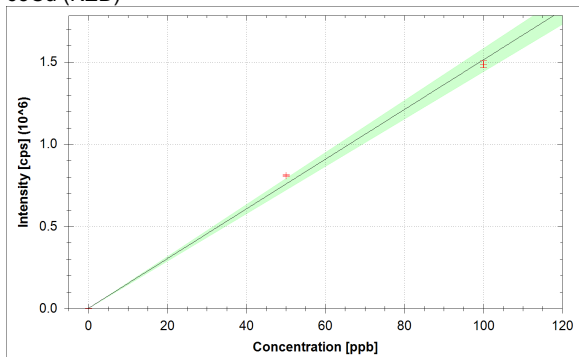

$$f(x) = 15118.3532 \cdot x + 1701.0887$$

$$R^2 = 0.9968$$

$$\text{BEC} = 0.113 \text{ ppb}$$

$$\text{LoD} = 0.0187 \text{ ppb}$$

64Zn (KED)

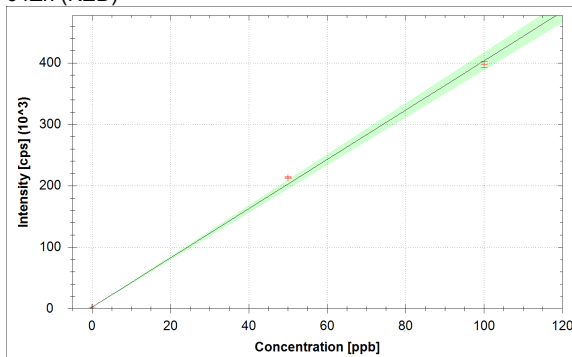

$$f(x) = 4007.7224 \cdot x + 2256.9934$$

$$R^2 = 0.9982$$

$$\text{BEC} = 0.563 \text{ ppb}$$

$$\text{LoD} = 0.0269 \text{ ppb}$$

69Ga (KED)

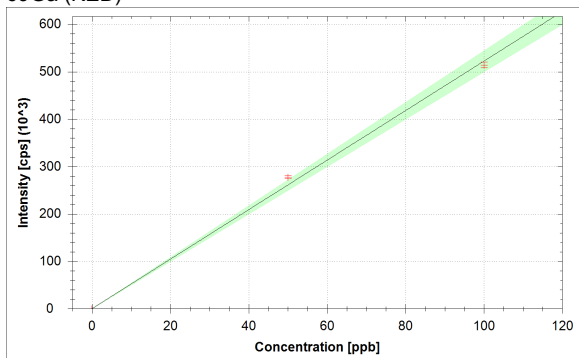

$$f(x) = 5223.3293 \cdot x + 129.9381$$

$$R^2 = 0.9974$$

$$\text{BEC} = 0.025 \text{ ppb}$$

$$\text{LoD} = 0.0083 \text{ ppb}$$

75As (KED)

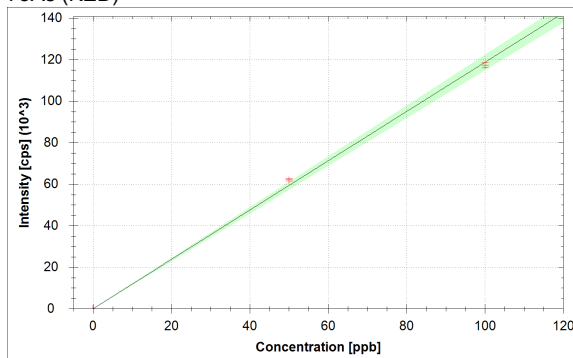

$$f(x) = 1187.0995 \cdot x + 12.2174$$

$$R^2 = 0.9987$$

$$\text{BEC} = 0.010 \text{ ppb}$$

$$\text{LoD} = 0.0048 \text{ ppb}$$

80Se (KED)

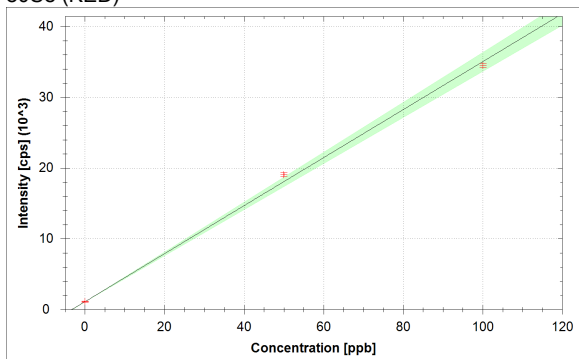

$$f(x) = 339.1908 \cdot x + 1111.9215$$

$$R^2 = 0.9977$$

$$\text{BEC} = 3.278 \text{ ppb}$$

$$\text{LoD} = 0.7629 \text{ ppb}$$

85Rb (KED)

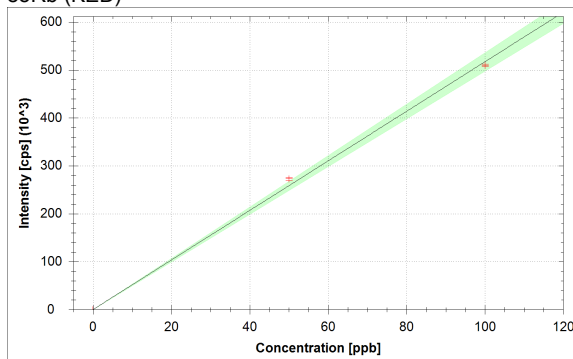

$$f(x) = 5170.7160 \cdot x + 41.1452$$

$$R^2 = 0.9980$$

$$\text{BEC} = 0.008 \text{ ppb}$$

$$\text{LoD} = 0.0112 \text{ ppb}$$

88Sr (KED)

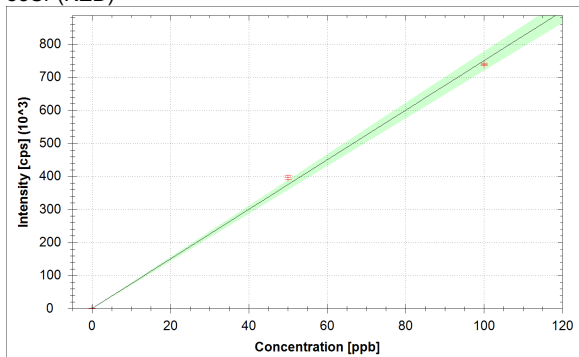

$$f(x) = 7497.0883 \cdot x + 228.8419$$

$$R^2 = 0.9979$$

$$\text{BEC} = 0.031 \text{ ppb}$$

$$\text{LoD} = 0.0098 \text{ ppb}$$

107Ag (KED)

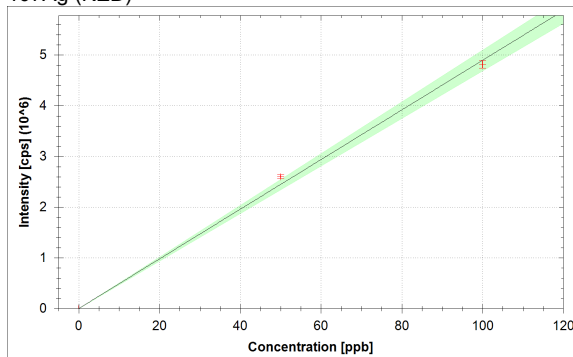

$$f(x) = 48951.6953 \cdot x + 88.9608$$

$$R^2 = 0.9974$$

$$\text{BEC} = 0.002 \text{ ppb}$$

$$\text{LoD} = 0.0005 \text{ ppb}$$

**<sup>114</sup>Cd (KED)**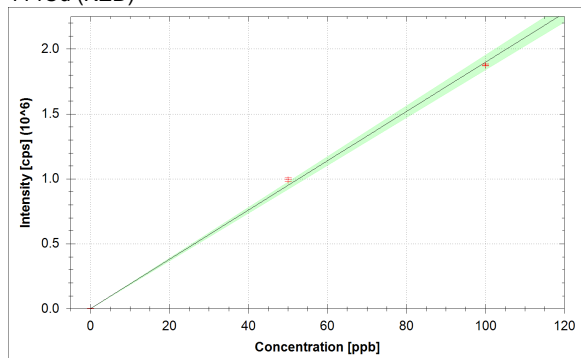

$$f(x) = 18959.3397 \cdot x + 846.6805$$

$$R^2 = 0.9987$$

$$\text{BEC} = 0.045 \text{ ppb}$$

$$\text{LoD} = 0.0190 \text{ ppb}$$

**<sup>133</sup>Cs (KED)**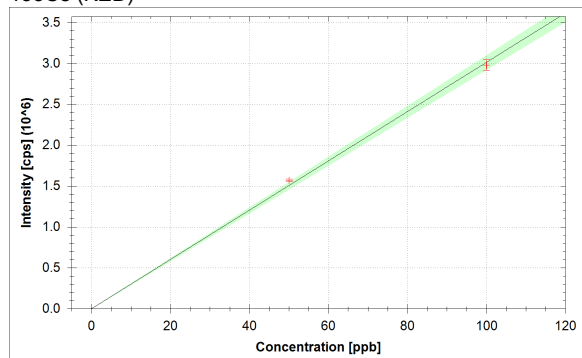

$$f(x) = 30124.7249 \cdot x + 191.4587$$

$$R^2 = 0.9988$$

$$\text{BEC} = 0.006 \text{ ppb}$$

$$\text{LoD} = 0.0039 \text{ ppb}$$

**<sup>138</sup>Ba (KED)**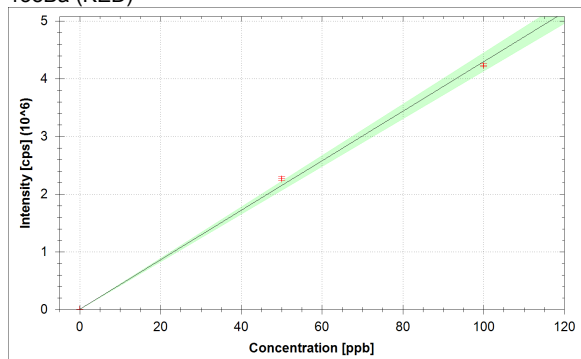

$$f(x) = 42903.8947 \cdot x + 3621.6714$$

$$R^2 = 0.9980$$

$$\text{BEC} = 0.084 \text{ ppb}$$

$$\text{LoD} = 0.0036 \text{ ppb}$$

**<sup>139</sup>La (KED)**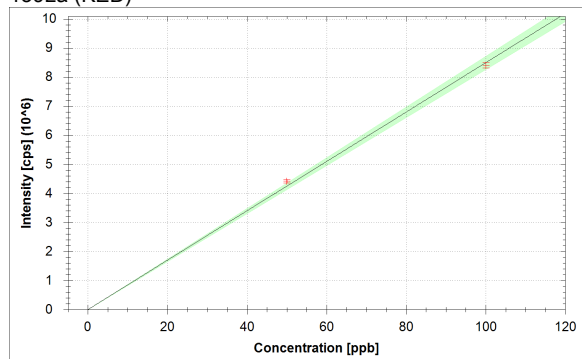

$$f(x) = 84937.8751 \cdot x + 246.7815$$

$$R^2 = 0.9990$$

$$\text{BEC} = 0.003 \text{ ppb}$$

$$\text{LoD} = 0.0010 \text{ ppb}$$

**<sup>140</sup>Ce (KED)**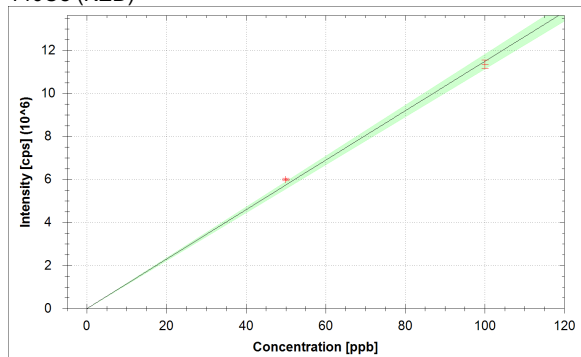

$$f(x) = 114787.5355 \cdot x + 805.2054$$

$$R^2 = 0.9987$$

$$\text{BEC} = 0.007 \text{ ppb}$$

$$\text{LoD} = 0.0023 \text{ ppb}$$

**<sup>141</sup>Pr (KED)**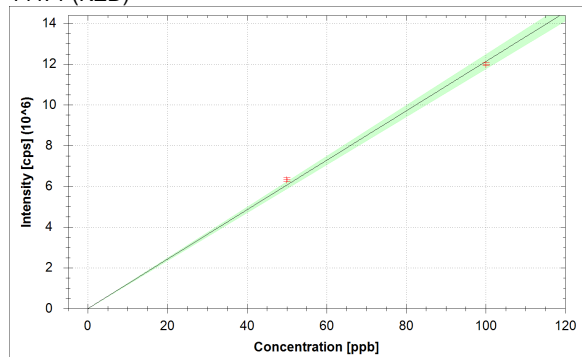

$$f(x) = 121238.8355 \cdot x + 83.4457$$

$$R^2 = 0.9988$$

$$\text{BEC} = 0.001 \text{ ppb}$$

$$\text{LoD} = 0.0006 \text{ ppb}$$

**<sup>142</sup>Nd (KED)**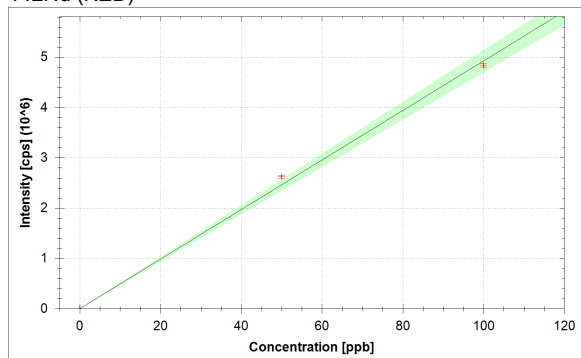

$$f(x) = 49247.8996 \cdot x + 154.5310$$

$$R^2 = 0.9972$$

$$\text{BEC} = 0.003 \text{ ppb}$$

$$\text{LoD} = 0.0020 \text{ ppb}$$

**<sup>152</sup>Sm (KED)**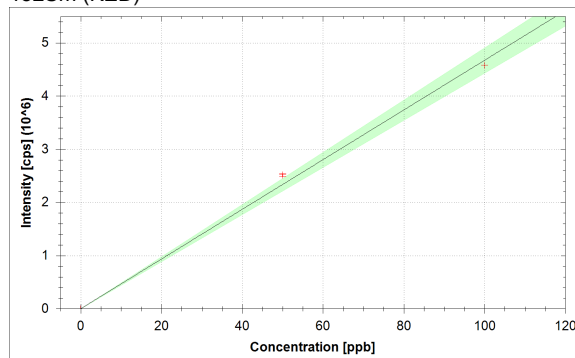

$$f(x) = 46715.5819 \cdot x + 18.8957$$

$$R^2 = 0.9962$$

$$\text{BEC} = 0.000 \text{ ppb}$$

$$\text{LoD} = 0.0001 \text{ ppb}$$

**<sup>153</sup>Eu (KED)**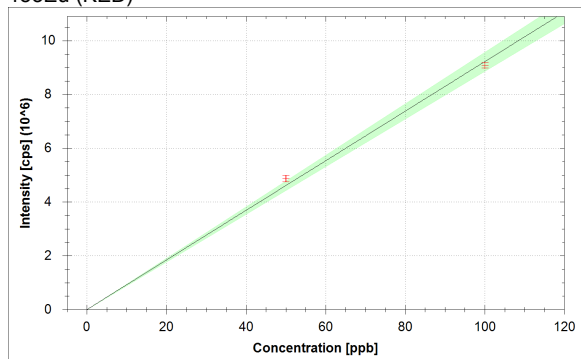

$$f(x) = 92188.4333 \cdot x + 24.4623$$

$$R^2 = 0.9979$$

$$\text{BEC} = 0.000 \text{ ppb}$$

$$\text{LoD} = 0.0003 \text{ ppb}$$

**<sup>158</sup>Gd (KED)**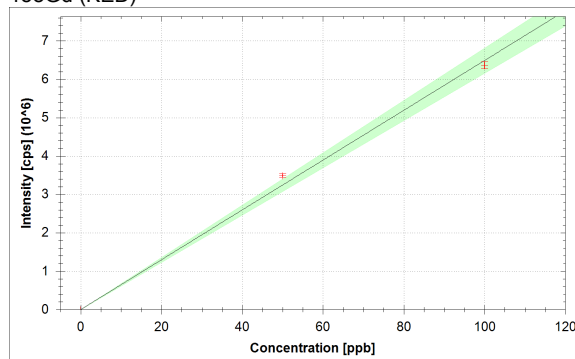

$$f(x) = 64884.8408 \cdot x + 25.5287$$

$$R^2 = 0.9963$$

$$\text{BEC} = 0.000 \text{ ppb}$$

$$\text{LoD} = 0.0003 \text{ ppb}$$

**<sup>164</sup>Dy (KED)**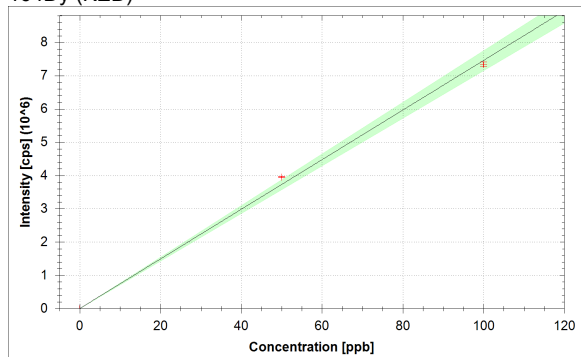

$$f(x) = 74568.3776 \cdot x + 46.5735$$

$$R^2 = 0.9976$$

$$\text{BEC} = 0.001 \text{ ppb}$$

$$\text{LoD} = 0.0008 \text{ ppb}$$

**<sup>166</sup>Er (KED)**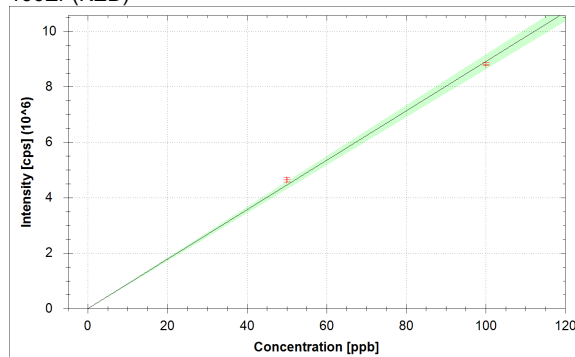

$$f(x) = 89053.8805 \cdot x + 526.8576$$

$$R^2 = 0.9988$$

$$\text{BEC} = 0.006 \text{ ppb}$$

$$\text{LoD} = 0.0012 \text{ ppb}$$

# Comprehensive

9/2/2021 5:36:52 PM

**<sup>169</sup>Tm (KED)**

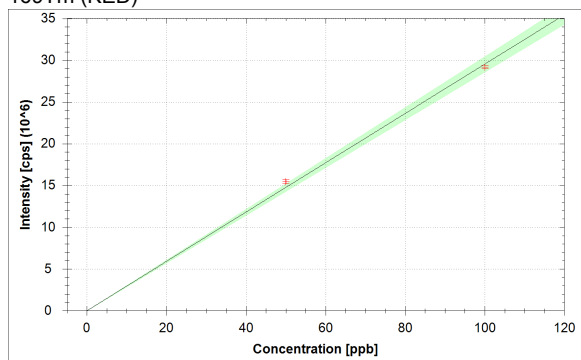

$$f(x) = 295287.5547 \cdot x + 47.8302$$

$$R^2 = 0.9986$$

$$\text{BEC} = 0.000 \text{ ppb}$$

$$\text{LoD} = 0.0001 \text{ ppb}$$

**<sup>174</sup>Yb (KED)**

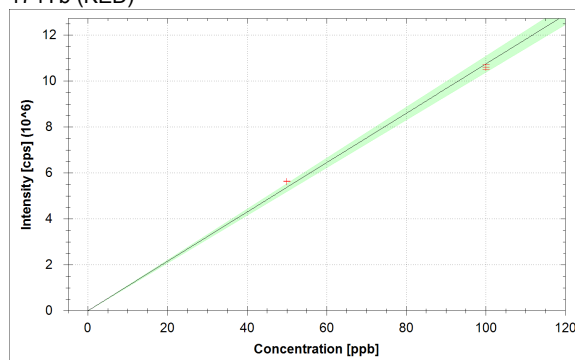

$$f(x) = 107384.4317 \cdot x + 86.7545$$

$$R^2 = 0.9985$$

$$\text{BEC} = 0.001 \text{ ppb}$$

$$\text{LoD} = 0.0006 \text{ ppb}$$

**<sup>175</sup>Lu (KED)**

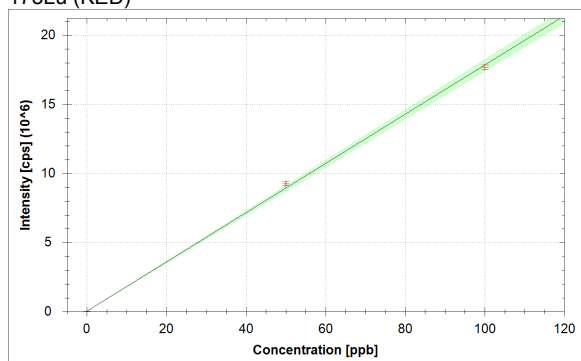

$$f(x) = 178180.3368 \cdot x + 28680.1334$$

$$R^2 = 0.9992$$

$$\text{BEC} = 0.161 \text{ ppb}$$

$$\text{LoD} = 0.0077 \text{ ppb}$$

**<sup>205</sup>Tl (KED)**

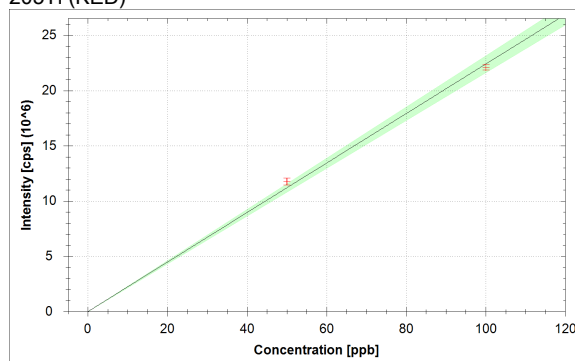

$$f(x) = 223989.2832 \cdot x + 61.0743$$

$$R^2 = 0.9983$$

$$\text{BEC} = 0.000 \text{ ppb}$$

$$\text{LoD} = 0.0002 \text{ ppb}$$

**<sup>208</sup>Pb (KED)**

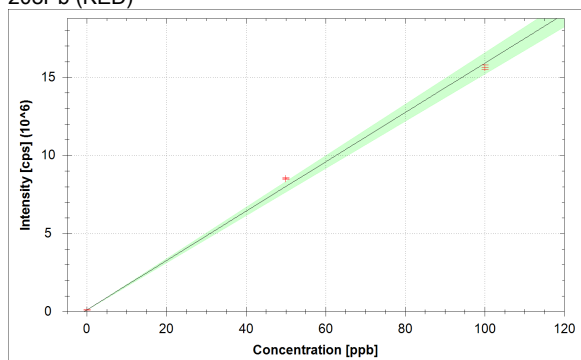

$$f(x) = 157918.7359 \cdot x + 104601.1280$$

$$R^2 = 0.9973$$

$$\text{BEC} = 0.662 \text{ ppb}$$

$$\text{LoD} = 0.0568 \text{ ppb}$$

**<sup>232</sup>Th (KED)**

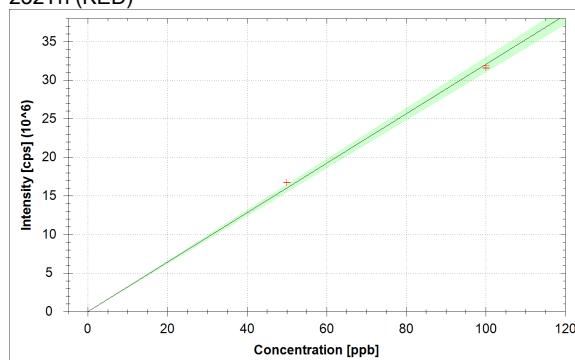

$$f(x) = 320324.9636 \cdot x + 1447.5197$$

$$R^2 = 0.9987$$

$$\text{BEC} = 0.005 \text{ ppb}$$

$$\text{LoD} = 0.0021 \text{ ppb}$$

# Comprehensive

9/2/2021 5:36:52 PM

238U (KED)

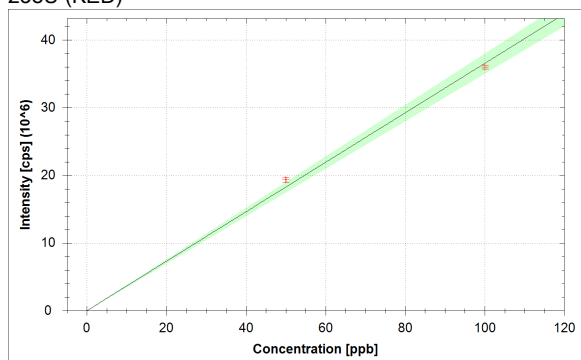

$$f(x) = 365414.0117 \cdot x + 1096.4179$$

$$R^2 = 0.9977$$

$$\text{BEC} = 0.003 \text{ ppb}$$

$$\text{LoD} = 0.0008 \text{ ppb}$$

# Comprehensive

9/2/2021 5:36:52 PM

## Standards:

Analysis Index: 3  
Analysis Name: 50+20  
Analysis Type: STD  
Analysis Started at: 9/2/2021 4:23:01 PM  
Standard (Stock): std1  
Standard DF: 1

| Category    | Concentration average | Concentration RSD | Standard Concentration |
|-------------|-----------------------|-------------------|------------------------|
| 6Li (KED)   | 94.603 %              |                   |                        |
| 9Be (KED)   | 53.717 ppb            | 4.7 %             | 50.000 ppb             |
| 11B (KED)   | 37.531 ppb            | 22.5 %            | 50.000 ppb             |
| 24Mg (KED)  | 53.506 ppb            | 4.1 %             | 50.000 ppb             |
| 27Al (KED)  | 52.389 ppb            | 3.2 %             | 50.000 ppb             |
| 45Sc (KED)  | 101.318 %             |                   |                        |
| 51V (KED)   | 53.407 ppb            | 0.8 %             | 50.000 ppb             |
| 52Cr (KED)  | 53.519 ppb            | 1.9 %             | 50.000 ppb             |
| 55Mn (KED)  | 53.342 ppb            | 0.8 %             | 50.000 ppb             |
| 56Fe (KED)  | 53.017 ppb            | 0.7 %             | 50.000 ppb             |
| 58Ni (KED)  | 54.366 ppb            | 1.2 %             | 50.000 ppb             |
| 59Co (KED)  | 54.256 ppb            | 1.1 %             | 50.000 ppb             |
| 63Cu (KED)  | 53.514 ppb            | 0.7 %             | 50.000 ppb             |
| 64Zn (KED)  | 52.655 ppb            | 0.8 %             | 50.000 ppb             |
| 69Ga (KED)  | 53.204 ppb            | 1.4 %             | 50.000 ppb             |
| 75As (KED)  | 52.277 ppb            | 0.9 %             | 50.000 ppb             |
| 80Se (KED)  | 52.967 ppb            | 1.5 %             | 50.000 ppb             |
| 85Rb (KED)  | 52.800 ppb            | 1.1 %             | 50.000 ppb             |
| 88Sr (KED)  | 52.830 ppb            | 1.4 %             | 50.000 ppb             |
| 89Y (KED)   | 98.387 %              |                   |                        |
| 107Ag (KED) | 53.154 ppb            | 1.5 %             | 50.000 ppb             |
| 114Cd (KED) | 52.258 ppb            | 1.6 %             | 50.000 ppb             |
| 115In (KED) | 99.756 %              |                   |                        |
| 133Cs (KED) | 52.162 ppb            | 1.0 %             | 50.000 ppb             |
| 138Ba (KED) | 52.785 ppb            | 1.6 %             | 50.000 ppb             |
| 139La (KED) | 52.028 ppb            | 1.4 %             | 50.000 ppb             |
| 140Ce (KED) | 52.239 ppb            | 1.1 %             | 50.000 ppb             |
| 141Pr (KED) | 52.193 ppb            | 1.6 %             | 50.000 ppb             |
| 142Nd (KED) | 53.313 ppb            | 1.2 %             | 50.000 ppb             |
| 152Sm (KED) | 53.832 ppb            | 1.1 %             | 50.000 ppb             |
| 153Eu (KED) | 52.889 ppb            | 2.5 %             | 50.000 ppb             |
| 158Gd (KED) | 53.805 ppb            | 1.3 %             | 50.000 ppb             |
| 159Tb (KED) | 100.228 %             |                   |                        |
| 164Dy (KED) | 53.037 ppb            | 0.7 %             | 50.000 ppb             |
| 166Er (KED) | 52.151 ppb            | 1.8 %             | 50.000 ppb             |
| 169Tm (KED) | 52.352 ppb            | 1.6 %             | 50.000 ppb             |
| 174Yb (KED) | 52.458 ppb            | 0.2 %             | 50.000 ppb             |
| 175Lu (KED) | 51.790 ppb            | 1.7 %             | 50.000 ppb             |
| 205Tl (KED) | 52.567 ppb            | 2.7 %             | 50.000 ppb             |
| 208Pb (KED) | 53.247 ppb            | 0.6 %             | 50.000 ppb             |
| 209Bi (KED) | 99.497 %              |                   |                        |
| 232Th (KED) | 52.236 ppb            | 0.3 %             | 50.000 ppb             |
| 238U (KED)  | 52.974 ppb            | 2.0 %             | 50.000 ppb             |

# Comprehensive

9/2/2021 5:36:52 PM

## Standards:

Analysis Index: 4  
Analysis Name: 100+20  
Analysis Type: STD  
Analysis Started at: 9/2/2021 4:26:29 PM  
Standard (Stock): std2  
Standard DF: 1

| Category    | Concentration average | Concentration RSD | Standard Concentration |
|-------------|-----------------------|-------------------|------------------------|
| 6Li (KED)   | 97.230 %              |                   |                        |
| 9Be (KED)   | 98.141 ppb            | 1.9 %             | 100.000 ppb            |
| 11B (KED)   | 106.235 ppb           | 5.9 %             | 100.000 ppb            |
| 24Mg (KED)  | 98.247 ppb            | 4.0 %             | 100.000 ppb            |
| 27Al (KED)  | 98.805 ppb            | 1.9 %             | 100.000 ppb            |
| 45Sc (KED)  | 103.194 %             |                   |                        |
| 51V (KED)   | 98.296 ppb            | 1.2 %             | 100.000 ppb            |
| 52Cr (KED)  | 98.241 ppb            | 1.1 %             | 100.000 ppb            |
| 55Mn (KED)  | 98.329 ppb            | 2.1 %             | 100.000 ppb            |
| 56Fe (KED)  | 98.491 ppb            | 0.5 %             | 100.000 ppb            |
| 58Ni (KED)  | 97.817 ppb            | 2.2 %             | 100.000 ppb            |
| 59Co (KED)  | 97.872 ppb            | 0.0 %             | 100.000 ppb            |
| 63Cu (KED)  | 98.243 ppb            | 1.4 %             | 100.000 ppb            |
| 64Zn (KED)  | 98.673 ppb            | 1.3 %             | 100.000 ppb            |
| 69Ga (KED)  | 98.398 ppb            | 1.2 %             | 100.000 ppb            |
| 75As (KED)  | 98.862 ppb            | 1.1 %             | 100.000 ppb            |
| 80Se (KED)  | 98.517 ppb            | 0.8 %             | 100.000 ppb            |
| 85Rb (KED)  | 98.600 ppb            | 0.5 %             | 100.000 ppb            |
| 88Sr (KED)  | 98.585 ppb            | 0.5 %             | 100.000 ppb            |
| 89Y (KED)   | 98.908 %              |                   |                        |
| 107Ag (KED) | 98.423 ppb            | 1.6 %             | 100.000 ppb            |
| 114Cd (KED) | 98.871 ppb            | 0.4 %             | 100.000 ppb            |
| 115In (KED) | 98.799 %              |                   |                        |
| 133Cs (KED) | 98.919 ppb            | 2.2 %             | 100.000 ppb            |
| 138Ba (KED) | 98.608 ppb            | 0.7 %             | 100.000 ppb            |
| 139La (KED) | 98.986 ppb            | 1.2 %             | 100.000 ppb            |
| 140Ce (KED) | 98.880 ppb            | 1.7 %             | 100.000 ppb            |
| 141Pr (KED) | 98.903 ppb            | 0.6 %             | 100.000 ppb            |
| 142Nd (KED) | 98.343 ppb            | 0.8 %             | 100.000 ppb            |
| 152Sm (KED) | 98.084 ppb            | 0.0 %             | 100.000 ppb            |
| 153Eu (KED) | 98.556 ppb            | 1.1 %             | 100.000 ppb            |
| 158Gd (KED) | 98.098 ppb            | 1.5 %             | 100.000 ppb            |
| 159Tb (KED) | 98.597 %              |                   |                        |
| 164Dy (KED) | 98.482 ppb            | 0.9 %             | 100.000 ppb            |
| 166Er (KED) | 98.925 ppb            | 0.6 %             | 100.000 ppb            |
| 169Tm (KED) | 98.824 ppb            | 0.7 %             | 100.000 ppb            |
| 174Yb (KED) | 98.771 ppb            | 1.0 %             | 100.000 ppb            |
| 175Lu (KED) | 99.105 ppb            | 1.0 %             | 100.000 ppb            |
| 205Tl (KED) | 98.716 ppb            | 1.2 %             | 100.000 ppb            |
| 208Pb (KED) | 98.376 ppb            | 0.9 %             | 100.000 ppb            |
| 209Bi (KED) | 98.687 %              |                   |                        |
| 232Th (KED) | 98.882 ppb            | 0.6 %             | 100.000 ppb            |
| 238U (KED)  | 98.513 ppb            | 0.8 %             | 100.000 ppb            |

# Comprehensive

9/2/2021 5:36:52 PM

## Sample List Summary:

Instrument ID: iCAP Q

| Index: | Label:             | Main<br>Runs: | Survey<br>Runs: | Start Time:         | User name:                    |
|--------|--------------------|---------------|-----------------|---------------------|-------------------------------|
| 1      | water              | 3             | 0               | 9/2/2021 4:16:47 PM | WINDOWS-UPCI4ER\Administrator |
| 2      | blk                | 3             | 0               | 9/2/2021 4:19:46 PM | WINDOWS-UPCI4ER\Administrator |
| 3      | 50+20              | 3             | 0               | 9/2/2021 4:23:01 PM | WINDOWS-UPCI4ER\Administrator |
| 4      | 100+20             | 3             | 0               | 9/2/2021 4:26:29 PM | WINDOWS-UPCI4ER\Administrator |
| 5      | 046055(178579)jian | 3             | 0               | 9/2/2021 4:29:44 PM | WINDOWS-UPCI4ER\Administrator |
| 6      | 022849(178574)jian | 3             | 0               | 9/2/2021 4:33:07 PM | WINDOWS-UPCI4ER\Administrator |
| 7      | 386jian            | 3             | 0               | 9/2/2021 4:36:19 PM | WINDOWS-UPCI4ER\Administrator |
| 8      | 364jian            | 3             | 0               | 9/2/2021 4:39:37 PM | WINDOWS-UPCI4ER\Administrator |
| 9      | 378jian            | 3             | 0               | 9/2/2021 4:43:06 PM | WINDOWS-UPCI4ER\Administrator |
| 10     | 372jian            | 3             | 0               | 9/2/2021 4:46:24 PM | WINDOWS-UPCI4ER\Administrator |
| 11     | 374jian            | 3             | 0               | 9/2/2021 4:49:50 PM | WINDOWS-UPCI4ER\Administrator |
| 12     | 366jian            | 3             | 0               | 9/2/2021 4:53:05 PM | WINDOWS-UPCI4ER\Administrator |
| 13     | 370jian            | 3             | 0               | 9/2/2021 4:56:18 PM | WINDOWS-UPCI4ER\Administrator |
| 14     | 392jian            | 3             | 0               | 9/2/2021 4:59:40 PM | WINDOWS-UPCI4ER\Administrator |
| 15     | 374jian            | 3             | 0               | 9/2/2021 5:02:57 PM | WINDOWS-UPCI4ER\Administrator |
| 16     | 384jian            | 3             | 0               | 9/2/2021 5:06:18 PM | WINDOWS-UPCI4ER\Administrator |
| 17     | 376jian            | 3             | 0               | 9/2/2021 5:09:43 PM | WINDOWS-UPCI4ER\Administrator |
| 18     | 390jian            | 3             | 0               | 9/2/2021 5:13:05 PM | WINDOWS-UPCI4ER\Administrator |
| 19     | 388jian            | 3             | 0               | 9/2/2021 5:16:22 PM | WINDOWS-UPCI4ER\Administrator |
| 20     | 368jian            | 3             | 0               | 9/2/2021 5:19:47 PM | WINDOWS-UPCI4ER\Administrator |
| 21     | 382jian            | 3             | 0               | 9/2/2021 5:23:09 PM | WINDOWS-UPCI4ER\Administrator |
| 22     | 380jian            | 3             | 0               | 9/2/2021 5:26:32 PM | WINDOWS-UPCI4ER\Administrator |
| 23     | 324jian            | 3             | 0               | 9/2/2021 5:29:51 PM | WINDOWS-UPCI4ER\Administrator |
| 24     | 328jian            | 3             | 0               | 9/2/2021 5:33:10 PM | WINDOWS-UPCI4ER\Administrator |

# Comprehensive

9/2/2021 5:36:52 PM

## Sample Summary

Instrument ID: iCAP Q

Analysis index: 1

Analysis name: water

Analysis started at: 9/2/2021 4:16:47 PM

User name: WINDOWS-UPCI4ER\Administrator

| Category    | Concentration average | Concentration RSD |
|-------------|-----------------------|-------------------|
| 6Li (KED)   | 0.048 %               | 173.2 %           |
| 11B (KED)   | Infinity ppb          |                   |
| 24Mg (KED)  | Infinity ppb          |                   |
| 27Al (KED)  | 60.346 ppb            | 33.7 %            |
| 45Sc (KED)  | 0.053 %               | 27.0 %            |
| 51V (KED)   | 2.909 ppb             | 7.9 %             |
| 52Cr (KED)  | 71.761 ppb            | 17.9 %            |
| 55Mn (KED)  | 57.327 ppb            | 37.6 %            |
| 56Fe (KED)  | 50.345 ppb            | 45.4 %            |
| 58Ni (KED)  | 419.327 ppb           | 34.8 %            |
| 59Co (KED)  | 10.461 ppb            | 44.8 %            |
| 63Cu (KED)  | Infinity ppb          |                   |
| 64Zn (KED)  | Infinity ppb          |                   |
| 69Ga (KED)  | Infinity ppb          |                   |
| 75As (KED)  | Infinity ppb          |                   |
| 80Se (KED)  | Infinity ppb          |                   |
| 85Rb (KED)  | Infinity ppb          |                   |
| 88Sr (KED)  | Infinity ppb          |                   |
| 89Y (KED)   | 0.000 %               |                   |
| 114Cd (KED) | Infinity ppb          |                   |
| 115In (KED) | 0.000 %               | 173.2 %           |
| 133Cs (KED) | Infinity ppb          |                   |
| 138Ba (KED) | Infinity ppb          |                   |
| 159Tb (KED) | 0.000 %               |                   |
| 205Tl (KED) | 52.538 ppb            | 52.1 %            |
| 208Pb (KED) | 92.291 ppb            | 65.8 %            |
| 209Bi (KED) | 0.000 %               | 74.2 %            |
| 232Th (KED) | 2.122 ppb             | 110.5 %           |
| 238U (KED)  | 17.116 ppb            | 40.3 %            |

| Category   | Concentration average | Intensity average | Intensity RSD |
|------------|-----------------------|-------------------|---------------|
| 6Li (KED)  | 0.048 %               | 1 cps             | 173.2 %       |
| 9Be (KED)  |                       | 0 cps             |               |
| 11B (KED)  | Infinity ppb          | 112 cps           | 9.5 %         |
| 24Mg (KED) | Infinity ppb          | 523 cps           | 17.1 %        |
| 27Al (KED) | 60.346 ppb            | 3 cps             | 0.0 %         |
| 45Sc (KED) | 0.053 %               | 19 cps            | 27.0 %        |
| 51V (KED)  | 2.909 ppb             | 10 cps            | 33.3 %        |
| 52Cr (KED) | 71.761 ppb            | 362 cps           | 11.7 %        |
| 55Mn (KED) | 57.327 ppb            | 143 cps           | 14.5 %        |
| 56Fe (KED) | 50.345 ppb            | 239 cps           | 10.7 %        |
| 58Ni (KED) | 419.327 ppb           | 2,414 cps         | 4.6 %         |
| 59Co (KED) | 10.461 ppb            | 98 cps            | 13.8 %        |
| 63Cu (KED) | Infinity ppb          | 29 cps            | 46.6 %        |
| 64Zn (KED) | Infinity ppb          | 103 cps           | 21.2 %        |
| 69Ga (KED) | Infinity ppb          | 29 cps            | 59.2 %        |
| 75As (KED) | Infinity ppb          | 10 cps            | 33.3 %        |
| 80Se (KED) | Infinity ppb          | 1,039 cps         | 6.0 %         |
| 85Rb (KED) | Infinity ppb          | 18 cps            | 78.1 %        |
| 88Sr (KED) | Infinity ppb          | 190 cps           | 15.6 %        |

# Comprehensive

9/2/2021 5:36:52 PM

---

| Category    | Concentration average | Intensity average | Intensity RSD |
|-------------|-----------------------|-------------------|---------------|
| 89Y (KED)   | 0.000 %               | 0 cps             |               |
| 107Ag (KED) |                       | 0 cps             |               |
| 114Cd (KED) | Infinity ppb          | 3 cps             | 100.0 %       |
| 115In (KED) | 0.000 %               | 1 cps             | 173.2 %       |
| 133Cs (KED) | Infinity ppb          | 3 cps             | 100.0 %       |
| 138Ba (KED) | Infinity ppb          | 754 cps           | 10.8 %        |
| 139La (KED) |                       | 0 cps             |               |
| 140Ce (KED) |                       | 4 cps             | 114.6 %       |
| 141Pr (KED) |                       | 1 cps             | 173.2 %       |
| 142Nd (KED) |                       | 1 cps             | 173.2 %       |
| 152Sm (KED) |                       | 0 cps             |               |
| 153Eu (KED) |                       | 1 cps             | 173.2 %       |
| 158Gd (KED) |                       | 0 cps             |               |
| 159Tb (KED) | 0.000 %               | 0 cps             |               |
| 164Dy (KED) |                       | 0 cps             |               |
| 166Er (KED) |                       | 0 cps             |               |
| 169Tm (KED) |                       | 0 cps             |               |
| 174Yb (KED) |                       | 0 cps             |               |
| 175Lu (KED) |                       | 0 cps             |               |
| 205Tl (KED) | 52.538 ppb            | 29 cps            | 13.3 %        |
| 208Pb (KED) | 92.291 ppb            | 32 cps            | 26.0 %        |
| 209Bi (KED) | 0.000 %               | 14 cps            | 74.2 %        |
| 232Th (KED) | 2.122 ppb             | 2 cps             | 86.6 %        |
| 238U (KED)  | 17.116 ppb            | 17 cps            | 34.6 %        |

# Comprehensive

9/2/2021 5:36:52 PM

## Sample Summary

Instrument ID: iCAP Q

Analysis index: 2

Analysis name: blk

Analysis started at: 9/2/2021 4:19:46 PM

User name: WINDOWS-UPCI4ER\Administrator

| Category    | Concentration average | Concentration RSD |
|-------------|-----------------------|-------------------|
| 6Li (KED)   | 100.000 %             |                   |
| 9Be (KED)   | 0.000 ppb             | 1.7 %             |
| 11B (KED)   | 0.000 ppb             | 0.0 %             |
| 24Mg (KED)  | 0.000 ppb             | 0.1 %             |
| 27Al (KED)  | 0.000 ppb             | 0.1 %             |
| 45Sc (KED)  | 100.000 %             |                   |
| 51V (KED)   | 0.000 ppb             | 0.2 %             |
| 52Cr (KED)  | 0.000 ppb             | 0.0 %             |
| 55Mn (KED)  | 0.000 ppb             | 0.1 %             |
| 56Fe (KED)  | 0.000 ppb             | 0.0 %             |
| 58Ni (KED)  | 0.000 ppb             | 0.0 %             |
| 59Co (KED)  | 0.000 ppb             | 0.2 %             |
| 63Cu (KED)  | 0.000 ppb             | 0.1 %             |
| 64Zn (KED)  | 0.000 ppb             | 0.0 %             |
| 69Ga (KED)  | 0.000 ppb             | 0.1 %             |
| 75As (KED)  | 0.000 ppb             | 0.2 %             |
| 80Se (KED)  | 0.000 ppb             | 0.1 %             |
| 85Rb (KED)  | 0.000 ppb             | 0.5 %             |
| 88Sr (KED)  | 0.000 ppb             | 0.1 %             |
| 89Y (KED)   | 100.000 %             |                   |
| 107Ag (KED) | 0.000 ppb             | 0.1 %             |
| 114Cd (KED) | 0.000 ppb             | 0.1 %             |
| 115In (KED) | 100.000 %             |                   |
| 133Cs (KED) | 0.000 ppb             | 0.2 %             |
| 138Ba (KED) | 0.000 ppb             | 0.0 %             |
| 139La (KED) | 0.000 ppb             | 0.1 %             |
| 140Ce (KED) | 0.000 ppb             | 0.1 %             |
| 141Pr (KED) | 0.000 ppb             | 0.3 %             |
| 142Nd (KED) | 0.000 ppb             | 0.2 %             |
| 152Sm (KED) | 0.000 ppb             | 0.1 %             |
| 153Eu (KED) | 0.000 ppb             | 0.4 %             |
| 158Gd (KED) | 0.000 ppb             | 0.3 %             |
| 159Tb (KED) | 100.000 %             |                   |
| 164Dy (KED) | 0.000 ppb             | 0.4 %             |
| 166Er (KED) | 0.000 ppb             | 0.1 %             |
| 169Tm (KED) | 0.000 ppb             | 0.3 %             |
| 174Yb (KED) | 0.000 ppb             | 0.2 %             |
| 175Lu (KED) | 0.000 ppb             | 0.0 %             |
| 205Tl (KED) | 0.000 ppb             | 0.2 %             |
| 208Pb (KED) | 0.000 ppb             | 0.0 %             |
| 209Bi (KED) | 100.000 %             |                   |
| 232Th (KED) | 0.000 ppb             | 0.2 %             |
| 238U (KED)  | 0.000 ppb             | 0.1 %             |

| Category   | Concentration average | Intensity average | Intensity RSD |
|------------|-----------------------|-------------------|---------------|
| 6Li (KED)  | 100.000 %             | 2,327 cps         | 0.2 %         |
| 9Be (KED)  | 0.000 ppb             | 1 cps             | 173.2 %       |
| 11B (KED)  | 0.000 ppb             | 2,308 cps         | 3.0 %         |
| 24Mg (KED) | 0.000 ppb             | 577 cps           | 5.3 %         |
| 27Al (KED) | 0.000 ppb             | 703 cps           | 5.5 %         |

# Comprehensive

9/2/2021 5:36:52 PM

| Category    | Concentration average | Intensity average | Intensity RSD |
|-------------|-----------------------|-------------------|---------------|
| 45Sc (KED)  | 100.000 %             | 35,590 cps        | 1.8 %         |
| 51V (KED)   | 0.000 ppb             | 78 cps            | 21.6 %        |
| 52Cr (KED)  | 0.000 ppb             | 1,502 cps         | 5.4 %         |
| 55Mn (KED)  | 0.000 ppb             | 240 cps           | 7.2 %         |
| 56Fe (KED)  | 0.000 ppb             | 44,915 cps        | 3.9 %         |
| 58Ni (KED)  | 0.000 ppb             | 2,726 cps         | 1.1 %         |
| 59Co (KED)  | 0.000 ppb             | 163 cps           | 21.3 %        |
| 63Cu (KED)  | 0.000 ppb             | 1,701 cps         | 5.8 %         |
| 64Zn (KED)  | 0.000 ppb             | 2,257 cps         | 1.2 %         |
| 69Ga (KED)  | 0.000 ppb             | 130 cps           | 11.8 %        |
| 75As (KED)  | 0.000 ppb             | 12 cps            | 15.7 %        |
| 80Se (KED)  | 0.000 ppb             | 1,112 cps         | 8.4 %         |
| 85Rb (KED)  | 0.000 ppb             | 41 cps            | 46.8 %        |
| 88Sr (KED)  | 0.000 ppb             | 229 cps           | 11.0 %        |
| 89Y (KED)   | 100.000 %             | 385,585 cps       | 0.7 %         |
| 107Ag (KED) | 0.000 ppb             | 89 cps            | 7.8 %         |
| 114Cd (KED) | 0.000 ppb             | 846 cps           | 12.8 %        |
| 115In (KED) | 100.000 %             | 795,693 cps       | 1.4 %         |
| 133Cs (KED) | 0.000 ppb             | 191 cps           | 19.1 %        |
| 138Ba (KED) | 0.000 ppb             | 3,622 cps         | 1.6 %         |
| 139La (KED) | 0.000 ppb             | 247 cps           | 10.7 %        |
| 140Ce (KED) | 0.000 ppb             | 806 cps           | 11.6 %        |
| 141Pr (KED) | 0.000 ppb             | 83 cps            | 26.2 %        |
| 142Nd (KED) | 0.000 ppb             | 154 cps           | 21.3 %        |
| 152Sm (KED) | 0.000 ppb             | 19 cps            | 10.2 %        |
| 153Eu (KED) | 0.000 ppb             | 24 cps            | 41.7 %        |
| 158Gd (KED) | 0.000 ppb             | 26 cps            | 27.2 %        |
| 159Tb (KED) | 100.000 %             | 4,522,525 cps     | 0.8 %         |
| 164Dy (KED) | 0.000 ppb             | 47 cps            | 42.9 %        |
| 166Er (KED) | 0.000 ppb             | 527 cps           | 6.1 %         |
| 169Tm (KED) | 0.000 ppb             | 48 cps            | 24.5 %        |
| 174Yb (KED) | 0.000 ppb             | 87 cps            | 24.0 %        |
| 175Lu (KED) | 0.000 ppb             | 28,680 cps        | 1.6 %         |
| 205Tl (KED) | 0.000 ppb             | 61 cps            | 20.7 %        |
| 208Pb (KED) | 0.000 ppb             | 104,590 cps       | 2.3 %         |
| 209Bi (KED) | 100.000 %             | 4,459,471 cps     | 0.5 %         |
| 232Th (KED) | 0.000 ppb             | 1,447 cps         | 14.9 %        |
| 238U (KED)  | 0.000 ppb             | 1,097 cps         | 9.4 %         |

# Comprehensive

9/2/2021 5:36:52 PM

## Sample Summary

Instrument ID: iCAP Q

Analysis index: 3

Analysis name: 50+20

Analysis started at: 9/2/2021 4:23:01 PM

User name: WINDOWS-UPCI4ER\Administrator

| Category    | Concentration average | Concentration RSD |
|-------------|-----------------------|-------------------|
| 6Li (KED)   | 94.603 %              |                   |
| 9Be (KED)   | 53.717 ppb            | 4.7 %             |
| 11B (KED)   | 37.531 ppb            | 22.5 %            |
| 24Mg (KED)  | 53.506 ppb            | 4.1 %             |
| 27Al (KED)  | 52.389 ppb            | 3.2 %             |
| 45Sc (KED)  | 101.318 %             |                   |
| 51V (KED)   | 53.407 ppb            | 0.8 %             |
| 52Cr (KED)  | 53.519 ppb            | 1.9 %             |
| 55Mn (KED)  | 53.342 ppb            | 0.8 %             |
| 56Fe (KED)  | 53.017 ppb            | 0.7 %             |
| 58Ni (KED)  | 54.366 ppb            | 1.2 %             |
| 59Co (KED)  | 54.256 ppb            | 1.1 %             |
| 63Cu (KED)  | 53.514 ppb            | 0.7 %             |
| 64Zn (KED)  | 52.655 ppb            | 0.8 %             |
| 69Ga (KED)  | 53.204 ppb            | 1.4 %             |
| 75As (KED)  | 52.277 ppb            | 0.9 %             |
| 80Se (KED)  | 52.967 ppb            | 1.5 %             |
| 85Rb (KED)  | 52.800 ppb            | 1.1 %             |
| 88Sr (KED)  | 52.830 ppb            | 1.4 %             |
| 89Y (KED)   | 98.387 %              |                   |
| 107Ag (KED) | 53.154 ppb            | 1.5 %             |
| 114Cd (KED) | 52.258 ppb            | 1.6 %             |
| 115In (KED) | 99.756 %              |                   |
| 133Cs (KED) | 52.162 ppb            | 1.0 %             |
| 138Ba (KED) | 52.785 ppb            | 1.6 %             |
| 139La (KED) | 52.028 ppb            | 1.4 %             |
| 140Ce (KED) | 52.239 ppb            | 1.1 %             |
| 141Pr (KED) | 52.193 ppb            | 1.6 %             |
| 142Nd (KED) | 53.313 ppb            | 1.2 %             |
| 152Sm (KED) | 53.832 ppb            | 1.1 %             |
| 153Eu (KED) | 52.889 ppb            | 2.5 %             |
| 158Gd (KED) | 53.805 ppb            | 1.3 %             |
| 159Tb (KED) | 100.228 %             |                   |
| 164Dy (KED) | 53.037 ppb            | 0.7 %             |
| 166Er (KED) | 52.151 ppb            | 1.8 %             |
| 169Tm (KED) | 52.352 ppb            | 1.6 %             |
| 174Yb (KED) | 52.458 ppb            | 0.2 %             |
| 175Lu (KED) | 51.790 ppb            | 1.7 %             |
| 205Tl (KED) | 52.567 ppb            | 2.7 %             |
| 208Pb (KED) | 53.247 ppb            | 0.6 %             |
| 209Bi (KED) | 99.497 %              |                   |
| 232Th (KED) | 52.236 ppb            | 0.3 %             |
| 238U (KED)  | 52.974 ppb            | 2.0 %             |

| Category   | Concentration average | Intensity average | Intensity RSD |
|------------|-----------------------|-------------------|---------------|
| 6Li (KED)  | 94.603 %              | 2,201 cps         | 5.2 %         |
| 9Be (KED)  | 53.717 ppb            | 5,748 cps         | 0.7 %         |
| 11B (KED)  | 37.531 ppb            | 3,436 cps         | 3.8 %         |
| 24Mg (KED) | 53.506 ppb            | 21,789 cps        | 2.5 %         |
| 27Al (KED) | 52.389 ppb            | 5,933 cps         | 3.0 %         |

# Comprehensive

9/2/2021 5:36:52 PM

| Category    | Concentration average | Intensity average | Intensity RSD |
|-------------|-----------------------|-------------------|---------------|
| 45Sc (KED)  | 101.318 %             | 36,059 cps        | 0.9 %         |
| 51V (KED)   | 53.407 ppb            | 345,388 cps       | 0.2 %         |
| 52Cr (KED)  | 53.519 ppb            | 533,093 cps       | 1.8 %         |
| 55Mn (KED)  | 53.342 ppb            | 272,823 cps       | 0.9 %         |
| 56Fe (KED)  | 53.017 ppb            | 515,929 cps       | 0.7 %         |
| 58Ni (KED)  | 54.366 ppb            | 639,320 cps       | 1.1 %         |
| 59Co (KED)  | 54.256 ppb            | 1,050,168 cps     | 0.5 %         |
| 63Cu (KED)  | 53.514 ppb            | 797,676 cps       | 1.3 %         |
| 64Zn (KED)  | 52.655 ppb            | 209,833 cps       | 0.2 %         |
| 69Ga (KED)  | 53.204 ppb            | 273,547 cps       | 1.6 %         |
| 75As (KED)  | 52.277 ppb            | 61,068 cps        | 1.1 %         |
| 80Se (KED)  | 52.967 ppb            | 18,769 cps        | 0.7 %         |
| 85Rb (KED)  | 52.800 ppb            | 268,632 cps       | 0.3 %         |
| 88Sr (KED)  | 52.830 ppb            | 389,899 cps       | 1.4 %         |
| 89Y (KED)   | 98.387 %              | 379,365 cps       | 0.9 %         |
| 107Ag (KED) | 53.154 ppb            | 2,595,497 cps     | 0.6 %         |
| 114Cd (KED) | 52.258 ppb            | 989,113 cps       | 0.7 %         |
| 115In (KED) | 99.756 %              | 793,753 cps       | 1.0 %         |
| 133Cs (KED) | 52.162 ppb            | 1,567,828 cps     | 2.0 %         |
| 138Ba (KED) | 52.785 ppb            | 2,273,112 cps     | 0.2 %         |
| 139La (KED) | 52.028 ppb            | 4,428,848 cps     | 0.4 %         |
| 140Ce (KED) | 52.239 ppb            | 6,010,251 cps     | 0.4 %         |
| 141Pr (KED) | 52.193 ppb            | 6,341,335 cps     | 0.2 %         |
| 142Nd (KED) | 53.313 ppb            | 2,631,416 cps     | 0.7 %         |
| 152Sm (KED) | 53.832 ppb            | 2,520,471 cps     | 1.6 %         |
| 153Eu (KED) | 52.889 ppb            | 4,885,650 cps     | 1.2 %         |
| 158Gd (KED) | 53.805 ppb            | 3,498,682 cps     | 0.6 %         |
| 159Tb (KED) | 100.228 %             | 4,532,847 cps     | 1.5 %         |
| 164Dy (KED) | 53.037 ppb            | 3,963,857 cps     | 1.5 %         |
| 166Er (KED) | 52.151 ppb            | 4,654,658 cps     | 1.1 %         |
| 169Tm (KED) | 52.352 ppb            | 15,491,694 cps    | 0.1 %         |
| 174Yb (KED) | 52.458 ppb            | 5,646,057 cps     | 1.4 %         |
| 175Lu (KED) | 51.790 ppb            | 9,276,254 cps     | 0.4 %         |
| 205Tl (KED) | 52.567 ppb            | 11,714,723 cps    | 2.3 %         |
| 208Pb (KED) | 53.247 ppb            | 8,470,386 cps     | 0.2 %         |
| 209Bi (KED) | 99.497 %              | 4,437,056 cps     | 0.4 %         |
| 232Th (KED) | 52.236 ppb            | 16,649,759 cps    | 0.4 %         |
| 238U (KED)  | 52.974 ppb            | 19,260,035 cps    | 1.6 %         |

# Comprehensive

9/2/2021 5:36:52 PM

## Sample Summary

Instrument ID: iCAP Q

Analysis index: 4

Analysis name: 100+20

Analysis started at: 9/2/2021 4:26:29 PM

User name: WINDOWS-UPCI4ER\Administrator

| Category    | Concentration average | Concentration RSD |
|-------------|-----------------------|-------------------|
| 6Li (KED)   | 97.230 %              |                   |
| 9Be (KED)   | 98.141 ppb            | 1.9 %             |
| 11B (KED)   | 106.235 ppb           | 5.9 %             |
| 24Mg (KED)  | 98.247 ppb            | 4.0 %             |
| 27Al (KED)  | 98.805 ppb            | 1.9 %             |
| 45Sc (KED)  | 103.194 %             |                   |
| 51V (KED)   | 98.296 ppb            | 1.2 %             |
| 52Cr (KED)  | 98.241 ppb            | 1.1 %             |
| 55Mn (KED)  | 98.329 ppb            | 2.1 %             |
| 56Fe (KED)  | 98.491 ppb            | 0.5 %             |
| 58Ni (KED)  | 97.817 ppb            | 2.2 %             |
| 59Co (KED)  | 97.872 ppb            | 0.0 %             |
| 63Cu (KED)  | 98.243 ppb            | 1.4 %             |
| 64Zn (KED)  | 98.673 ppb            | 1.3 %             |
| 69Ga (KED)  | 98.398 ppb            | 1.2 %             |
| 75As (KED)  | 98.862 ppb            | 1.1 %             |
| 80Se (KED)  | 98.517 ppb            | 0.8 %             |
| 85Rb (KED)  | 98.600 ppb            | 0.5 %             |
| 88Sr (KED)  | 98.585 ppb            | 0.5 %             |
| 89Y (KED)   | 98.908 %              |                   |
| 107Ag (KED) | 98.423 ppb            | 1.6 %             |
| 114Cd (KED) | 98.871 ppb            | 0.4 %             |
| 115In (KED) | 98.799 %              |                   |
| 133Cs (KED) | 98.919 ppb            | 2.2 %             |
| 138Ba (KED) | 98.608 ppb            | 0.7 %             |
| 139La (KED) | 98.986 ppb            | 1.2 %             |
| 140Ce (KED) | 98.880 ppb            | 1.7 %             |
| 141Pr (KED) | 98.903 ppb            | 0.6 %             |
| 142Nd (KED) | 98.343 ppb            | 0.8 %             |
| 152Sm (KED) | 98.084 ppb            | 0.0 %             |
| 153Eu (KED) | 98.556 ppb            | 1.1 %             |
| 158Gd (KED) | 98.098 ppb            | 1.5 %             |
| 159Tb (KED) | 98.597 %              |                   |
| 164Dy (KED) | 98.482 ppb            | 0.9 %             |
| 166Er (KED) | 98.925 ppb            | 0.6 %             |
| 169Tm (KED) | 98.824 ppb            | 0.7 %             |
| 174Yb (KED) | 98.771 ppb            | 1.0 %             |
| 175Lu (KED) | 99.105 ppb            | 1.0 %             |
| 205Tl (KED) | 98.716 ppb            | 1.2 %             |
| 208Pb (KED) | 98.376 ppb            | 0.9 %             |
| 209Bi (KED) | 98.687 %              |                   |
| 232Th (KED) | 98.882 ppb            | 0.6 %             |
| 238U (KED)  | 98.513 ppb            | 0.8 %             |

| Category   | Concentration average | Intensity average | Intensity RSD |
|------------|-----------------------|-------------------|---------------|
| 6Li (KED)  | 97.230 %              | 2,262 cps         | 3.8 %         |
| 9Be (KED)  | 98.141 ppb            | 10,805 cps        | 1.9 %         |
| 11B (KED)  | 106.235 ppb           | 5,909 cps         | 0.1 %         |
| 24Mg (KED) | 98.247 ppb            | 40,662 cps        | 0.3 %         |
| 27Al (KED) | 98.805 ppb            | 10,752 cps        | 1.7 %         |

# Comprehensive

9/2/2021 5:36:52 PM

| Category    | Concentration average | Intensity average | Intensity RSD |
|-------------|-----------------------|-------------------|---------------|
| 45Sc (KED)  | 103.194 %             | 36,726 cps        | 0.5 %         |
| 51V (KED)   | 98.296 ppb            | 647,402 cps       | 1.0 %         |
| 52Cr (KED)  | 98.241 ppb            | 995,394 cps       | 0.8 %         |
| 55Mn (KED)  | 98.329 ppb            | 512,058 cps       | 2.5 %         |
| 56Fe (KED)  | 98.491 ppb            | 936,474 cps       | 0.9 %         |
| 58Ni (KED)  | 97.817 ppb            | 1,169,300 cps     | 1.8 %         |
| 59Co (KED)  | 97.872 ppb            | 1,929,416 cps     | 0.5 %         |
| 63Cu (KED)  | 98.243 ppb            | 1,470,646 cps     | 1.4 %         |
| 64Zn (KED)  | 98.673 ppb            | 393,331 cps       | 1.0 %         |
| 69Ga (KED)  | 98.398 ppb            | 508,436 cps       | 0.9 %         |
| 75As (KED)  | 98.862 ppb            | 116,078 cps       | 0.7 %         |
| 80Se (KED)  | 98.517 ppb            | 34,151 cps        | 1.7 %         |
| 85Rb (KED)  | 98.600 ppb            | 504,284 cps       | 1.0 %         |
| 88Sr (KED)  | 98.585 ppb            | 731,219 cps       | 0.9 %         |
| 89Y (KED)   | 98.908 %              | 381,374 cps       | 1.4 %         |
| 107Ag (KED) | 98.423 ppb            | 4,759,514 cps     | 0.6 %         |
| 114Cd (KED) | 98.871 ppb            | 1,852,810 cps     | 1.3 %         |
| 115In (KED) | 98.799 %              | 786,136 cps       | 1.5 %         |
| 133Cs (KED) | 98.919 ppb            | 2,943,939 cps     | 1.8 %         |
| 138Ba (KED) | 98.608 ppb            | 4,174,711 cps     | 0.3 %         |
| 139La (KED) | 98.986 ppb            | 8,289,549 cps     | 0.7 %         |
| 140Ce (KED) | 98.880 ppb            | 11,190,743 cps    | 0.9 %         |
| 141Pr (KED) | 98.903 ppb            | 11,822,420 cps    | 0.3 %         |
| 142Nd (KED) | 98.343 ppb            | 4,775,207 cps     | 0.1 %         |
| 152Sm (KED) | 98.084 ppb            | 4,517,795 cps     | 0.9 %         |
| 153Eu (KED) | 98.556 ppb            | 8,957,715 cps     | 0.3 %         |
| 158Gd (KED) | 98.098 ppb            | 6,275,228 cps     | 0.7 %         |
| 159Tb (KED) | 98.597 %              | 4,459,084 cps     | 0.9 %         |
| 164Dy (KED) | 98.482 ppb            | 7,240,255 cps     | 0.1 %         |
| 166Er (KED) | 98.925 ppb            | 8,686,563 cps     | 1.0 %         |
| 169Tm (KED) | 98.824 ppb            | 28,771,045 cps    | 0.2 %         |
| 174Yb (KED) | 98.771 ppb            | 10,457,282 cps    | 0.6 %         |
| 175Lu (KED) | 99.105 ppb            | 17,438,316 cps    | 0.6 %         |
| 205Tl (KED) | 98.716 ppb            | 21,820,104 cps    | 1.0 %         |
| 208Pb (KED) | 98.376 ppb            | 15,434,031 cps    | 0.6 %         |
| 209Bi (KED) | 98.687 %              | 4,400,919 cps     | 1.0 %         |
| 232Th (KED) | 98.882 ppb            | 31,259,951 cps    | 1.2 %         |
| 238U (KED)  | 98.513 ppb            | 35,525,994 cps    | 1.1 %         |

# Comprehensive

9/2/2021 5:36:52 PM

## Sample Summary

Instrument ID: iCAP Q

Analysis index: 5

Analysis name: 046055(178579)jian

Analysis started at: 9/2/2021 4:29:44 PM

User name: WINDOWS-UPCI4ER\Administrator

| Category    | Concentration average | Concentration RSD |
|-------------|-----------------------|-------------------|
| 6Li (KED)   | 110.316 %             | 5.2 %             |
| 9Be (KED)   | 0.071 ppb             | 42.6 %            |
| 11B (KED)   | -52.316 ppb           | 2.2 %             |
| 24Mg (KED)  | 875.773 ppb           | 2.3 %             |
| 27Al (KED)  | 1,192.725 ppb         | 0.7 %             |
| 45Sc (KED)  | 111.477 %             | 3.0 %             |
| 51V (KED)   | 2.245 ppb             | 2.6 %             |
| 52Cr (KED)  | 3.676 ppb             | 1.0 %             |
| 55Mn (KED)  | 32.696 ppb            | 0.2 %             |
| 56Fe (KED)  | 1,392.529 ppb         | 1.1 %             |
| 58Ni (KED)  | 5.867 ppb             | 0.6 %             |
| 59Co (KED)  | 0.607 ppb             | 3.1 %             |
| 63Cu (KED)  | 11.952 ppb            | 0.6 %             |
| 64Zn (KED)  | 166.185 ppb           | 0.0 %             |
| 69Ga (KED)  | 2.884 ppb             | 16.6 %            |
| 75As (KED)  | 1.052 ppb             | 38.2 %            |
| 80Se (KED)  | 0.312 ppb             | 77.9 %            |
| 85Rb (KED)  | 3.386 ppb             | 9.8 %             |
| 88Sr (KED)  | 13.765 ppb            | 1.6 %             |
| 89Y (KED)   | 102.891 %             | 2.1 %             |
| 107Ag (KED) | 0.240 ppb             | 90.7 %            |
| 114Cd (KED) | 0.224 ppb             | 71.3 %            |
| 115In (KED) | 94.056 %              | 1.1 %             |
| 133Cs (KED) | 0.418 ppb             | 38.5 %            |
| 138Ba (KED) | 10.795 ppb            | 0.7 %             |
| 139La (KED) | 1.339 ppb             | 6.3 %             |
| 140Ce (KED) | 2.659 ppb             | 0.7 %             |
| 141Pr (KED) | 0.366 ppb             | 18.8 %            |
| 142Nd (KED) | 1.706 ppb             | 2.5 %             |
| 152Sm (KED) | 0.273 ppb             | 21.1 %            |
| 153Eu (KED) | 0.081 ppb             | 65.9 %            |
| 158Gd (KED) | 0.235 ppb             | 16.2 %            |
| 159Tb (KED) | 99.102 %              | 1.5 %             |
| 164Dy (KED) | 0.168 ppb             | 19.7 %            |
| 166Er (KED) | 0.095 ppb             | 30.1 %            |
| 169Tm (KED) | 0.033 ppb             | 89.4 %            |
| 174Yb (KED) | 0.081 ppb             | 33.8 %            |
| 175Lu (KED) | 0.020 ppb             | 130.5 %           |
| 205Tl (KED) | 0.047 ppb             | 43.7 %            |
| 208Pb (KED) | 1.098 ppb             | 3.5 %             |
| 209Bi (KED) | 87.410 %              | 2.6 %             |
| 232Th (KED) | 0.521 ppb             | 9.1 %             |
| 238U (KED)  | 0.127 ppb             | 14.8 %            |

| Category   | Concentration average | Intensity average | Intensity RSD |
|------------|-----------------------|-------------------|---------------|
| 6Li (KED)  | 110.316 %             | 2,567 cps         | 5.2 %         |
| 9Be (KED)  | 0.071 ppb             | 10 cps            | 33.3 %        |
| 11B (KED)  | -52.316 ppb           | 494 cps           | 7.0 %         |
| 24Mg (KED) | 875.773 ppb           | 406,326 cps       | 3.2 %         |
| 27Al (KED) | 1,192.725 ppb         | 131,528 cps       | 2.8 %         |

# Comprehensive

9/2/2021 5:36:52 PM

| Category    | Concentration average | Intensity average | Intensity RSD |
|-------------|-----------------------|-------------------|---------------|
| 45Sc (KED)  | 111.477 %             | 39,674 cps        | 3.0 %         |
| 51V (KED)   | 2.245 ppb             | 16,065 cps        | 5.3 %         |
| 52Cr (KED)  | 3.676 ppb             | 41,850 cps        | 2.8 %         |
| 55Mn (KED)  | 32.696 ppb            | 184,095 cps       | 2.9 %         |
| 56Fe (KED)  | 1,392.529 ppb         | 13,642,283 cps    | 2.0 %         |
| 58Ni (KED)  | 5.867 ppb             | 78,611 cps        | 2.4 %         |
| 59Co (KED)  | 0.607 ppb             | 13,104 cps        | 0.4 %         |
| 63Cu (KED)  | 11.952 ppb            | 187,659 cps       | 1.5 %         |
| 64Zn (KED)  | 166.185 ppb           | 687,597 cps       | 2.1 %         |
| 69Ga (KED)  | 2.884 ppb             | 15,620 cps        | 15.8 %        |
| 75As (KED)  | 1.052 ppb             | 1,296 cps         | 36.9 %        |
| 80Se (KED)  | 0.312 ppb             | 1,252 cps         | 5.6 %         |
| 85Rb (KED)  | 3.386 ppb             | 18,041 cps        | 8.6 %         |
| 88Sr (KED)  | 13.765 ppb            | 106,404 cps       | 1.6 %         |
| 89Y (KED)   | 102.891 %             | 396,732 cps       | 2.1 %         |
| 107Ag (KED) | 0.240 ppb             | 11,122 cps        | 89.8 %        |
| 114Cd (KED) | 0.224 ppb             | 4,785 cps         | 59.1 %        |
| 115In (KED) | 94.056 %              | 748,401 cps       | 1.1 %         |
| 133Cs (KED) | 0.418 ppb             | 12,022 cps        | 37.6 %        |
| 138Ba (KED) | 10.795 ppb            | 462,554 cps       | 1.1 %         |
| 139La (KED) | 1.339 ppb             | 112,990 cps       | 7.8 %         |
| 140Ce (KED) | 2.659 ppb             | 303,320 cps       | 2.0 %         |
| 141Pr (KED) | 0.366 ppb             | 44,191 cps        | 20.4 %        |
| 142Nd (KED) | 1.706 ppb             | 83,432 cps        | 4.0 %         |
| 152Sm (KED) | 0.273 ppb             | 12,672 cps        | 22.7 %        |
| 153Eu (KED) | 0.081 ppb             | 7,456 cps         | 67.3 %        |
| 158Gd (KED) | 0.235 ppb             | 15,184 cps        | 17.8 %        |
| 159Tb (KED) | 99.102 %              | 4,481,891 cps     | 1.5 %         |
| 164Dy (KED) | 0.168 ppb             | 12,451 cps        | 21.2 %        |
| 166Er (KED) | 0.095 ppb             | 8,944 cps         | 30.0 %        |
| 169Tm (KED) | 0.033 ppb             | 9,833 cps         | 90.5 %        |
| 174Yb (KED) | 0.081 ppb             | 8,758 cps         | 35.2 %        |
| 175Lu (KED) | 0.020 ppb             | 31,934 cps        | 15.8 %        |
| 205Tl (KED) | 0.047 ppb             | 9,242 cps         | 45.1 %        |
| 208Pb (KED) | 1.098 ppb             | 242,983 cps       | 1.7 %         |
| 209Bi (KED) | 87.410 %              | 3,898,034 cps     | 2.6 %         |
| 232Th (KED) | 0.521 ppb             | 147,387 cps       | 11.1 %        |
| 238U (KED)  | 0.127 ppb             | 41,436 cps        | 15.9 %        |

# Comprehensive

9/2/2021 5:36:52 PM

## Sample Summary

Instrument ID: iCAP Q

Analysis index: 6

Analysis name: 022849(178574)jian

Analysis started at: 9/2/2021 4:33:07 PM

User name: WINDOWS-UPCI4ER\Administrator

| Category    | Concentration average | Concentration RSD |
|-------------|-----------------------|-------------------|
| 6Li (KED)   | 126.364 %             | 3.2 %             |
| 9Be (KED)   | 0.107 ppb             | 78.7 %            |
| 11B (KED)   | -49.653 ppb           | 1.9 %             |
| 24Mg (KED)  | 508.640 ppb           | 3.9 %             |
| 27Al (KED)  | 657.239 ppb           | 0.9 %             |
| 45Sc (KED)  | 124.229 %             | 2.9 %             |
| 51V (KED)   | 1.233 ppb             | 5.5 %             |
| 52Cr (KED)  | 3.126 ppb             | 1.8 %             |
| 55Mn (KED)  | 17.558 ppb            | 0.9 %             |
| 56Fe (KED)  | 672.339 ppb           | 2.1 %             |
| 58Ni (KED)  | 3.456 ppb             | 2.8 %             |
| 59Co (KED)  | 0.325 ppb             | 9.2 %             |
| 63Cu (KED)  | 13.163 ppb            | 2.1 %             |
| 64Zn (KED)  | 159.535 ppb           | 1.7 %             |
| 69Ga (KED)  | 1.956 ppb             | 2.4 %             |
| 75As (KED)  | 0.511 ppb             | 5.3 %             |
| 80Se (KED)  | 0.092 ppb             | 303.2 %           |
| 85Rb (KED)  | 2.438 ppb             | 2.2 %             |
| 88Sr (KED)  | 9.246 ppb             | 2.1 %             |
| 89Y (KED)   | 105.387 %             | 0.7 %             |
| 107Ag (KED) | 0.219 ppb             | 5.1 %             |
| 114Cd (KED) | 0.298 ppb             | 1.8 %             |
| 115In (KED) | 95.695 %              | 0.7 %             |
| 133Cs (KED) | 0.158 ppb             | 8.5 %             |
| 138Ba (KED) | 7.407 ppb             | 0.7 %             |
| 139La (KED) | 0.588 ppb             | 0.2 %             |
| 140Ce (KED) | 1.200 ppb             | 2.9 %             |
| 141Pr (KED) | 0.145 ppb             | 7.8 %             |
| 142Nd (KED) | 0.759 ppb             | 0.9 %             |
| 152Sm (KED) | 0.110 ppb             | 8.7 %             |
| 153Eu (KED) | 0.030 ppb             | 26.3 %            |
| 158Gd (KED) | 0.100 ppb             | 9.9 %             |
| 159Tb (KED) | 95.730 %              | 0.9 %             |
| 164Dy (KED) | 0.071 ppb             | 6.7 %             |
| 166Er (KED) | 0.044 ppb             | 25.7 %            |
| 169Tm (KED) | 0.012 ppb             | 56.4 %            |
| 174Yb (KED) | 0.036 ppb             | 14.9 %            |
| 175Lu (KED) | -0.005 ppb            | 155.8 %           |
| 205Tl (KED) | 0.026 ppb             | 28.3 %            |
| 208Pb (KED) | 1.422 ppb             | 4.2 %             |
| 209Bi (KED) | 82.036 %              | 1.9 %             |
| 232Th (KED) | 0.215 ppb             | 4.4 %             |
| 238U (KED)  | 0.068 ppb             | 22.7 %            |

| Category   | Concentration average | Intensity average | Intensity RSD |
|------------|-----------------------|-------------------|---------------|
| 6Li (KED)  | 126.364 %             | 2,940 cps         | 3.2 %         |
| 9Be (KED)  | 0.107 ppb             | 17 cps            | 72.1 %        |
| 11B (KED)  | -49.653 ppb           | 687 cps           | 6.0 %         |
| 24Mg (KED) | 508.640 ppb           | 270,655 cps       | 2.7 %         |
| 27Al (KED) | 657.239 ppb           | 81,168 cps        | 3.1 %         |

# Comprehensive

9/2/2021 5:36:52 PM

| Category    | Concentration average | Intensity average | Intensity RSD |
|-------------|-----------------------|-------------------|---------------|
| 45Sc (KED)  | 124.229 %             | 44,213 cps        | 2.9 %         |
| 51V (KED)   | 1.233 ppb             | 9,870 cps         | 5.1 %         |
| 52Cr (KED)  | 3.126 ppb             | 39,925 cps        | 1.1 %         |
| 55Mn (KED)  | 17.558 ppb            | 110,296 cps       | 2.1 %         |
| 56Fe (KED)  | 672.339 ppb           | 7,369,244 cps     | 2.5 %         |
| 58Ni (KED)  | 3.456 ppb             | 52,979 cps        | 1.5 %         |
| 59Co (KED)  | 0.325 ppb             | 7,907 cps         | 7.6 %         |
| 63Cu (KED)  | 13.163 ppb            | 211,497 cps       | 1.7 %         |
| 64Zn (KED)  | 159.535 ppb           | 676,157 cps       | 1.2 %         |
| 69Ga (KED)  | 1.956 ppb             | 10,906 cps        | 2.2 %         |
| 75As (KED)  | 0.511 ppb             | 652 cps           | 5.5 %         |
| 80Se (KED)  | 0.092 ppb             | 1,205 cps         | 8.2 %         |
| 85Rb (KED)  | 2.438 ppb             | 13,327 cps        | 1.5 %         |
| 88Sr (KED)  | 9.246 ppb             | 73,288 cps        | 1.5 %         |
| 89Y (KED)   | 105.387 %             | 406,358 cps       | 0.7 %         |
| 107Ag (KED) | 0.219 ppb             | 10,357 cps        | 4.4 %         |
| 114Cd (KED) | 0.298 ppb             | 6,224 cps         | 1.8 %         |
| 115In (KED) | 95.695 %              | 761,439 cps       | 0.7 %         |
| 133Cs (KED) | 0.158 ppb             | 4,741 cps         | 7.6 %         |
| 138Ba (KED) | 7.407 ppb             | 307,676 cps       | 0.5 %         |
| 139La (KED) | 0.588 ppb             | 48,021 cps        | 0.7 %         |
| 140Ce (KED) | 1.200 ppb             | 132,673 cps       | 2.4 %         |
| 141Pr (KED) | 0.145 ppb             | 16,927 cps        | 7.4 %         |
| 142Nd (KED) | 0.759 ppb             | 35,916 cps        | 1.2 %         |
| 152Sm (KED) | 0.110 ppb             | 4,924 cps         | 8.3 %         |
| 153Eu (KED) | 0.030 ppb             | 2,680 cps         | 25.6 %        |
| 158Gd (KED) | 0.100 ppb             | 6,216 cps         | 9.1 %         |
| 159Tb (KED) | 95.730 %              | 4,329,428 cps     | 0.9 %         |
| 164Dy (KED) | 0.071 ppb             | 5,133 cps         | 6.2 %         |
| 166Er (KED) | 0.044 ppb             | 4,250 cps         | 22.1 %        |
| 169Tm (KED) | 0.012 ppb             | 3,548 cps         | 55.2 %        |
| 174Yb (KED) | 0.036 ppb             | 3,788 cps         | 14.0 %        |
| 175Lu (KED) | -0.005 ppb            | 26,656 cps        | 3.9 %         |
| 205Tl (KED) | 0.026 ppb             | 4,789 cps         | 27.7 %        |
| 208Pb (KED) | 1.422 ppb             | 270,002 cps       | 2.4 %         |
| 209Bi (KED) | 82.036 %              | 3,658,388 cps     | 1.9 %         |
| 232Th (KED) | 0.215 ppb             | 57,748 cps        | 4.4 %         |
| 238U (KED)  | 0.068 ppb             | 21,192 cps        | 21.7 %        |

# Comprehensive

9/2/2021 5:36:52 PM

## Sample Summary

Instrument ID: iCAP Q

Analysis index: 7

Analysis name: 386jian

Analysis started at: 9/2/2021 4:36:19 PM

User name: WINDOWS-UPCI4ER\Administrator

| Category    | Concentration average | Concentration RSD |
|-------------|-----------------------|-------------------|
| 6Li (KED)   | 140.693 %             | 2.8 %             |
| 9Be (KED)   | -0.003 ppb            | 382.6 %           |
| 11B (KED)   | -41.971 ppb           | 6.6 %             |
| 24Mg (KED)  | 526.893 ppb           | 2.7 %             |
| 27Al (KED)  | 601.645 ppb           | 1.3 %             |
| 45Sc (KED)  | 134.721 %             | 1.4 %             |
| 51V (KED)   | 1.079 ppb             | 1.5 %             |
| 52Cr (KED)  | 3.349 ppb             | 0.8 %             |
| 55Mn (KED)  | 17.258 ppb            | 0.8 %             |
| 56Fe (KED)  | 552.015 ppb           | 1.0 %             |
| 58Ni (KED)  | 2.610 ppb             | 1.6 %             |
| 59Co (KED)  | 0.358 ppb             | 1.9 %             |
| 63Cu (KED)  | 5.562 ppb             | 0.4 %             |
| 64Zn (KED)  | 166.075 ppb           | 0.7 %             |
| 69Ga (KED)  | 17.044 ppb            | 1.9 %             |
| 75As (KED)  | 0.713 ppb             | 9.4 %             |
| 80Se (KED)  | 0.317 ppb             | 32.4 %            |
| 85Rb (KED)  | 2.429 ppb             | 1.3 %             |
| 88Sr (KED)  | 9.771 ppb             | 1.4 %             |
| 89Y (KED)   | 108.282 %             | 1.1 %             |
| 107Ag (KED) | 0.118 ppb             | 13.0 %            |
| 114Cd (KED) | 0.071 ppb             | 29.0 %            |
| 115In (KED) | 95.786 %              | 0.5 %             |
| 133Cs (KED) | 0.148 ppb             | 6.2 %             |
| 138Ba (KED) | 63.673 ppb            | 1.3 %             |
| 139La (KED) | 0.494 ppb             | 1.4 %             |
| 140Ce (KED) | 1.014 ppb             | 0.6 %             |
| 141Pr (KED) | 0.121 ppb             | 6.8 %             |
| 142Nd (KED) | 0.624 ppb             | 3.1 %             |
| 152Sm (KED) | 0.113 ppb             | 3.0 %             |
| 153Eu (KED) | 0.038 ppb             | 5.1 %             |
| 158Gd (KED) | 0.080 ppb             | 10.7 %            |
| 159Tb (KED) | 96.364 %              | 0.8 %             |
| 164Dy (KED) | 0.058 ppb             | 6.2 %             |
| 166Er (KED) | 0.031 ppb             | 8.5 %             |
| 169Tm (KED) | 0.008 ppb             | 20.4 %            |
| 174Yb (KED) | 0.027 ppb             | 7.5 %             |
| 175Lu (KED) | -0.013 ppb            | 36.4 %            |
| 205Tl (KED) | 0.020 ppb             | 6.6 %             |
| 208Pb (KED) | 0.763 ppb             | 3.2 %             |
| 209Bi (KED) | 79.921 %              | 1.4 %             |
| 232Th (KED) | 0.174 ppb             | 2.3 %             |
| 238U (KED)  | 0.061 ppb             | 2.6 %             |

| Category   | Concentration average | Intensity average | Intensity RSD |
|------------|-----------------------|-------------------|---------------|
| 6Li (KED)  | 140.693 %             | 3,274 cps         | 2.8 %         |
| 9Be (KED)  | -0.003 ppb            | 1 cps             | 173.2 %       |
| 11B (KED)  | -41.971 ppb           | 1,147 cps         | 9.6 %         |
| 24Mg (KED) | 526.893 ppb           | 312,171 cps       | 0.8 %         |
| 27Al (KED) | 601.645 ppb           | 80,661 cps        | 2.4 %         |

# Comprehensive

9/2/2021 5:36:52 PM

| Category    | Concentration average | Intensity average | Intensity RSD |
|-------------|-----------------------|-------------------|---------------|
| 45Sc (KED)  | 134.721 %             | 47,946 cps        | 1.4 %         |
| 51V (KED)   | 1.079 ppb             | 9,381 cps         | 2.9 %         |
| 52Cr (KED)  | 3.349 ppb             | 46,253 cps        | 1.3 %         |
| 55Mn (KED)  | 17.258 ppb            | 117,588 cps       | 1.3 %         |
| 56Fe (KED)  | 552.015 ppb           | 6,572,872 cps     | 0.6 %         |
| 58Ni (KED)  | 2.610 ppb             | 44,309 cps        | 1.9 %         |
| 59Co (KED)  | 0.358 ppb             | 9,429 cps         | 2.7 %         |
| 63Cu (KED)  | 5.562 ppb             | 92,898 cps        | 1.6 %         |
| 64Zn (KED)  | 166.075 ppb           | 723,131 cps       | 1.1 %         |
| 69Ga (KED)  | 17.044 ppb            | 96,549 cps        | 2.6 %         |
| 75As (KED)  | 0.713 ppb             | 929 cps           | 8.8 %         |
| 80Se (KED)  | 0.317 ppb             | 1,320 cps         | 1.8 %         |
| 85Rb (KED)  | 2.429 ppb             | 13,644 cps        | 1.9 %         |
| 88Sr (KED)  | 9.771 ppb             | 79,564 cps        | 0.9 %         |
| 89Y (KED)   | 108.282 %             | 417,519 cps       | 1.1 %         |
| 107Ag (KED) | 0.118 ppb             | 5,605 cps         | 12.5 %        |
| 114Cd (KED) | 0.071 ppb             | 2,099 cps         | 17.5 %        |
| 115In (KED) | 95.786 %              | 762,166 cps       | 0.5 %         |
| 133Cs (KED) | 0.148 ppb             | 4,467 cps         | 5.7 %         |
| 138Ba (KED) | 63.673 ppb            | 2,636,061 cps     | 1.7 %         |
| 139La (KED) | 0.494 ppb             | 40,688 cps        | 0.8 %         |
| 140Ce (KED) | 1.014 ppb             | 112,895 cps       | 0.9 %         |
| 141Pr (KED) | 0.121 ppb             | 14,236 cps        | 5.9 %         |
| 142Nd (KED) | 0.624 ppb             | 29,762 cps        | 3.1 %         |
| 152Sm (KED) | 0.113 ppb             | 5,091 cps         | 2.4 %         |
| 153Eu (KED) | 0.038 ppb             | 3,369 cps         | 4.3 %         |
| 158Gd (KED) | 0.080 ppb             | 5,045 cps         | 10.0 %        |
| 159Tb (KED) | 96.364 %              | 4,358,070 cps     | 0.8 %         |
| 164Dy (KED) | 0.058 ppb             | 4,211 cps         | 5.8 %         |
| 166Er (KED) | 0.031 ppb             | 3,159 cps         | 6.4 %         |
| 169Tm (KED) | 0.008 ppb             | 2,407 cps         | 19.3 %        |
| 174Yb (KED) | 0.027 ppb             | 2,841 cps         | 6.5 %         |
| 175Lu (KED) | -0.013 ppb            | 25,438 cps        | 2.9 %         |
| 205Tl (KED) | 0.020 ppb             | 3,609 cps         | 7.5 %         |
| 208Pb (KED) | 0.763 ppb             | 179,872 cps       | 2.2 %         |
| 209Bi (KED) | 79.921 %              | 3,564,073 cps     | 1.4 %         |
| 232Th (KED) | 0.174 ppb             | 45,636 cps        | 2.3 %         |
| 238U (KED)  | 0.061 ppb             | 18,697 cps        | 3.0 %         |

# Comprehensive

9/2/2021 5:36:52 PM

## Sample Summary

Instrument ID: iCAP Q

Analysis index: 8

Analysis name: 364jian

Analysis started at: 9/2/2021 4:39:37 PM

User name: WINDOWS-UPCI4ER\Administrator

| Category    | Concentration average | Concentration RSD |
|-------------|-----------------------|-------------------|
| 6Li (KED)   | 143.033 %             | 4.8 %             |
| 9Be (KED)   | 0.024 ppb             | 178.0 %           |
| 11B (KED)   | -56.033 ppb           | 0.2 %             |
| 24Mg (KED)  | 359.780 ppb           | 4.9 %             |
| 27Al (KED)  | 545.271 ppb           | 2.8 %             |
| 45Sc (KED)  | 136.369 %             | 1.1 %             |
| 51V (KED)   | 0.897 ppb             | 2.1 %             |
| 52Cr (KED)  | 3.407 ppb             | 3.4 %             |
| 55Mn (KED)  | 11.236 ppb            | 2.6 %             |
| 56Fe (KED)  | 488.719 ppb           | 1.4 %             |
| 58Ni (KED)  | 2.273 ppb             | 1.1 %             |
| 59Co (KED)  | 0.231 ppb             | 3.3 %             |
| 63Cu (KED)  | 6.483 ppb             | 0.6 %             |
| 64Zn (KED)  | 184.166 ppb           | 0.1 %             |
| 69Ga (KED)  | 1.444 ppb             | 2.7 %             |
| 75As (KED)  | 0.452 ppb             | 3.4 %             |
| 80Se (KED)  | 0.376 ppb             | 44.9 %            |
| 85Rb (KED)  | 2.369 ppb             | 2.4 %             |
| 88Sr (KED)  | 5.480 ppb             | 0.9 %             |
| 89Y (KED)   | 107.245 %             | 0.8 %             |
| 107Ag (KED) | 0.048 ppb             | 6.1 %             |
| 114Cd (KED) | 0.030 ppb             | 17.0 %            |
| 115In (KED) | 94.387 %              | 1.4 %             |
| 133Cs (KED) | 0.125 ppb             | 3.2 %             |
| 138Ba (KED) | 4.868 ppb             | 1.5 %             |
| 139La (KED) | 0.486 ppb             | 2.0 %             |
| 140Ce (KED) | 0.888 ppb             | 1.4 %             |
| 141Pr (KED) | 0.101 ppb             | 0.7 %             |
| 142Nd (KED) | 0.532 ppb             | 2.4 %             |
| 152Sm (KED) | 0.075 ppb             | 2.5 %             |
| 153Eu (KED) | 0.017 ppb             | 2.0 %             |
| 158Gd (KED) | 0.070 ppb             | 2.3 %             |
| 159Tb (KED) | 93.531 %              | 0.2 %             |
| 164Dy (KED) | 0.047 ppb             | 2.1 %             |
| 166Er (KED) | 0.024 ppb             | 2.1 %             |
| 169Tm (KED) | 0.006 ppb             | 2.7 %             |
| 174Yb (KED) | 0.020 ppb             | 3.7 %             |
| 175Lu (KED) | -0.014 ppb            | 34.7 %            |
| 205Tl (KED) | 0.015 ppb             | 4.2 %             |
| 208Pb (KED) | 0.346 ppb             | 7.0 %             |
| 209Bi (KED) | 75.995 %              | 3.5 %             |
| 232Th (KED) | 0.148 ppb             | 3.5 %             |
| 238U (KED)  | 0.039 ppb             | 1.1 %             |

| Category   | Concentration average | Intensity average | Intensity RSD |
|------------|-----------------------|-------------------|---------------|
| 6Li (KED)  | 143.033 %             | 3,328 cps         | 4.8 %         |
| 9Be (KED)  | 0.024 ppb             | 6 cps             | 124.9 %       |
| 11B (KED)  | -56.033 ppb           | 453 cps           | 4.6 %         |
| 24Mg (KED) | 359.780 ppb           | 216,733 cps       | 0.2 %         |
| 27Al (KED) | 545.271 ppb           | 74,070 cps        | 2.0 %         |

# Comprehensive

9/2/2021 5:36:52 PM

| Category    | Concentration average | Intensity average | Intensity RSD |
|-------------|-----------------------|-------------------|---------------|
| 45Sc (KED)  | 136.369 %             | 48,533 cps        | 1.1 %         |
| 51V (KED)   | 0.897 ppb             | 7,911 cps         | 1.0 %         |
| 52Cr (KED)  | 3.407 ppb             | 47,586 cps        | 2.2 %         |
| 55Mn (KED)  | 11.236 ppb            | 77,595 cps        | 1.6 %         |
| 56Fe (KED)  | 488.719 ppb           | 5,897,379 cps     | 0.5 %         |
| 58Ni (KED)  | 2.273 ppb             | 39,531 cps        | 0.7 %         |
| 59Co (KED)  | 0.231 ppb             | 6,252 cps         | 2.3 %         |
| 63Cu (KED)  | 6.483 ppb             | 106,940 cps       | 0.4 %         |
| 64Zn (KED)  | 184.166 ppb           | 793,975 cps       | 0.7 %         |
| 69Ga (KED)  | 1.444 ppb             | 8,228 cps         | 3.4 %         |
| 75As (KED)  | 0.452 ppb             | 589 cps           | 2.9 %         |
| 80Se (KED)  | 0.376 ppb             | 1,329 cps         | 4.2 %         |
| 85Rb (KED)  | 2.369 ppb             | 13,178 cps        | 1.8 %         |
| 88Sr (KED)  | 5.480 ppb             | 44,304 cps        | 1.7 %         |
| 89Y (KED)   | 107.245 %             | 413,521 cps       | 0.8 %         |
| 107Ag (KED) | 0.048 ppb             | 2,301 cps         | 7.0 %         |
| 114Cd (KED) | 0.030 ppb             | 1,329 cps         | 7.9 %         |
| 115In (KED) | 94.387 %              | 751,033 cps       | 1.4 %         |
| 133Cs (KED) | 0.125 ppb             | 3,736 cps         | 4.4 %         |
| 138Ba (KED) | 4.868 ppb             | 198,748 cps       | 1.6 %         |
| 139La (KED) | 0.486 ppb             | 38,859 cps        | 2.2 %         |
| 140Ce (KED) | 0.888 ppb             | 96,101 cps        | 1.3 %         |
| 141Pr (KED) | 0.101 ppb             | 11,476 cps        | 0.5 %         |
| 142Nd (KED) | 0.532 ppb             | 24,672 cps        | 2.3 %         |
| 152Sm (KED) | 0.075 ppb             | 3,283 cps         | 2.7 %         |
| 153Eu (KED) | 0.017 ppb             | 1,515 cps         | 1.9 %         |
| 158Gd (KED) | 0.070 ppb             | 4,280 cps         | 2.2 %         |
| 159Tb (KED) | 93.531 %              | 4,229,966 cps     | 0.2 %         |
| 164Dy (KED) | 0.047 ppb             | 3,318 cps         | 2.1 %         |
| 166Er (KED) | 0.024 ppb             | 2,531 cps         | 1.7 %         |
| 169Tm (KED) | 0.006 ppb             | 1,742 cps         | 2.8 %         |
| 174Yb (KED) | 0.020 ppb             | 2,094 cps         | 3.8 %         |
| 175Lu (KED) | -0.014 ppb            | 24,470 cps        | 3.4 %         |
| 205Tl (KED) | 0.015 ppb             | 2,673 cps         | 4.5 %         |
| 208Pb (KED) | 0.346 ppb             | 120,946 cps       | 1.2 %         |
| 209Bi (KED) | 75.995 %              | 3,388,983 cps     | 3.5 %         |
| 232Th (KED) | 0.148 ppb             | 37,008 cps        | 0.9 %         |
| 238U (KED)  | 0.039 ppb             | 11,784 cps        | 2.5 %         |

# Comprehensive

9/2/2021 5:36:52 PM

## Sample Summary

Instrument ID: iCAP Q

Analysis index: 9

Analysis name: 378jian

Analysis started at: 9/2/2021 4:43:06 PM

User name: WINDOWS-UPCI4ER\Administrator

| Category    | Concentration average | Concentration RSD |
|-------------|-----------------------|-------------------|
| 6Li (KED)   | 149.912 %             | 2.2 %             |
| 9Be (KED)   | 0.010 ppb             | 200.4 %           |
| 11B (KED)   | -52.043 ppb           | 0.8 %             |
| 24Mg (KED)  | 531.756 ppb           | 2.1 %             |
| 27Al (KED)  | 738.047 ppb           | 1.0 %             |
| 45Sc (KED)  | 139.309 %             | 1.4 %             |
| 51V (KED)   | 1.346 ppb             | 1.9 %             |
| 52Cr (KED)  | 3.211 ppb             | 2.5 %             |
| 55Mn (KED)  | 17.858 ppb            | 2.2 %             |
| 56Fe (KED)  | 736.589 ppb           | 2.2 %             |
| 58Ni (KED)  | 3.153 ppb             | 0.7 %             |
| 59Co (KED)  | 0.372 ppb             | 0.2 %             |
| 63Cu (KED)  | 7.868 ppb             | 0.9 %             |
| 64Zn (KED)  | 184.207 ppb           | 0.5 %             |
| 69Ga (KED)  | 1.941 ppb             | 1.2 %             |
| 75As (KED)  | 0.848 ppb             | 8.6 %             |
| 80Se (KED)  | 0.468 ppb             | 18.1 %            |
| 85Rb (KED)  | 4.199 ppb             | 0.3 %             |
| 88Sr (KED)  | 7.580 ppb             | 0.8 %             |
| 89Y (KED)   | 107.567 %             | 0.2 %             |
| 107Ag (KED) | 0.073 ppb             | 5.3 %             |
| 114Cd (KED) | 0.049 ppb             | 13.3 %            |
| 115In (KED) | 94.129 %              | 2.2 %             |
| 133Cs (KED) | 0.185 ppb             | 1.4 %             |
| 138Ba (KED) | 6.531 ppb             | 3.2 %             |
| 139La (KED) | 0.642 ppb             | 3.5 %             |
| 140Ce (KED) | 1.346 ppb             | 3.2 %             |
| 141Pr (KED) | 0.156 ppb             | 3.1 %             |
| 142Nd (KED) | 0.821 ppb             | 3.0 %             |
| 152Sm (KED) | 0.120 ppb             | 0.6 %             |
| 153Eu (KED) | 0.027 ppb             | 3.2 %             |
| 158Gd (KED) | 0.107 ppb             | 3.3 %             |
| 159Tb (KED) | 90.730 %              | 3.3 %             |
| 164Dy (KED) | 0.075 ppb             | 2.4 %             |
| 166Er (KED) | 0.040 ppb             | 6.4 %             |
| 169Tm (KED) | 0.007 ppb             | 5.4 %             |
| 174Yb (KED) | 0.032 ppb             | 1.5 %             |
| 175Lu (KED) | -0.011 ppb            | 45.8 %            |
| 205Tl (KED) | 0.017 ppb             | 3.4 %             |
| 208Pb (KED) | 0.419 ppb             | 2.6 %             |
| 209Bi (KED) | 74.312 %              | 0.9 %             |
| 232Th (KED) | 0.212 ppb             | 2.7 %             |
| 238U (KED)  | 0.058 ppb             | 0.9 %             |

| Category   | Concentration average | Intensity average | Intensity RSD |
|------------|-----------------------|-------------------|---------------|
| 6Li (KED)  | 149.912 %             | 3,488 cps         | 2.2 %         |
| 9Be (KED)  | 0.010 ppb             | 3 cps             | 100.0 %       |
| 11B (KED)  | -52.043 ppb           | 688 cps           | 4.1 %         |
| 24Mg (KED) | 531.756 ppb           | 335,741 cps       | 0.3 %         |
| 27Al (KED) | 738.047 ppb           | 102,081 cps       | 1.0 %         |

# Comprehensive

9/2/2021 5:36:52 PM

| Category    | Concentration average | Intensity average | Intensity RSD |
|-------------|-----------------------|-------------------|---------------|
| 45Sc (KED)  | 139.309 %             | 49,579 cps        | 1.4 %         |
| 51V (KED)   | 1.346 ppb             | 12,074 cps        | 1.2 %         |
| 52Cr (KED)  | 3.211 ppb             | 45,943 cps        | 1.8 %         |
| 55Mn (KED)  | 17.858 ppb            | 125,782 cps       | 1.0 %         |
| 56Fe (KED)  | 736.589 ppb           | 9,047,335 cps     | 0.8 %         |
| 58Ni (KED)  | 3.153 ppb             | 54,558 cps        | 1.1 %         |
| 59Co (KED)  | 0.372 ppb             | 10,121 cps        | 1.4 %         |
| 63Cu (KED)  | 7.868 ppb             | 129,774 cps       | 0.6 %         |
| 64Zn (KED)  | 184.207 ppb           | 796,536 cps       | 0.4 %         |
| 69Ga (KED)  | 1.941 ppb             | 11,047 cps        | 1.0 %         |
| 75As (KED)  | 0.848 ppb             | 1,097 cps         | 8.7 %         |
| 80Se (KED)  | 0.468 ppb             | 1,367 cps         | 2.3 %         |
| 85Rb (KED)  | 4.199 ppb             | 23,399 cps        | 0.4 %         |
| 88Sr (KED)  | 7.580 ppb             | 61,376 cps        | 0.6 %         |
| 89Y (KED)   | 107.567 %             | 414,761 cps       | 0.2 %         |
| 107Ag (KED) | 0.073 ppb             | 3,442 cps         | 5.8 %         |
| 114Cd (KED) | 0.049 ppb             | 1,666 cps         | 7.5 %         |
| 115In (KED) | 94.129 %              | 748,976 cps       | 2.2 %         |
| 133Cs (KED) | 0.185 ppb             | 5,415 cps         | 3.4 %         |
| 138Ba (KED) | 6.531 ppb             | 257,345 cps       | 0.8 %         |
| 139La (KED) | 0.642 ppb             | 49,696 cps        | 0.2 %         |
| 140Ce (KED) | 1.346 ppb             | 140,830 cps       | 0.1 %         |
| 141Pr (KED) | 0.156 ppb             | 17,262 cps        | 1.9 %         |
| 142Nd (KED) | 0.821 ppb             | 36,815 cps        | 0.6 %         |
| 152Sm (KED) | 0.120 ppb             | 5,101 cps         | 3.3 %         |
| 153Eu (KED) | 0.027 ppb             | 2,252 cps         | 3.6 %         |
| 158Gd (KED) | 0.107 ppb             | 6,328 cps         | 1.3 %         |
| 159Tb (KED) | 90.730 %              | 4,103,270 cps     | 3.3 %         |
| 164Dy (KED) | 0.075 ppb             | 5,121 cps         | 5.4 %         |
| 166Er (KED) | 0.040 ppb             | 3,719 cps         | 3.0 %         |
| 169Tm (KED) | 0.007 ppb             | 2,020 cps         | 2.3 %         |
| 174Yb (KED) | 0.032 ppb             | 3,237 cps         | 4.7 %         |
| 175Lu (KED) | -0.011 ppb            | 24,186 cps        | 4.6 %         |
| 205Tl (KED) | 0.017 ppb             | 2,816 cps         | 4.3 %         |
| 208Pb (KED) | 0.419 ppb             | 126,936 cps       | 1.7 %         |
| 209Bi (KED) | 74.312 %              | 3,313,912 cps     | 0.9 %         |
| 232Th (KED) | 0.212 ppb             | 51,458 cps        | 1.8 %         |
| 238U (KED)  | 0.058 ppb             | 16,570 cps        | 1.0 %         |

# Comprehensive

9/2/2021 5:36:52 PM

## Sample Summary

Instrument ID: iCAP Q

Analysis index: 10

Analysis name: 372jian

Analysis started at: 9/2/2021 4:46:24 PM

User name: WINDOWS-UPCI4ER\Administrator

| Category    | Concentration average | Concentration RSD |
|-------------|-----------------------|-------------------|
| 6Li (KED)   | 149.482 %             | 1.1 %             |
| 9Be (KED)   | 0.029 ppb             | 65.8 %            |
| 11B (KED)   | -54.786 ppb           | 0.2 %             |
| 24Mg (KED)  | 619.340 ppb           | 1.6 %             |
| 27Al (KED)  | 949.800 ppb           | 1.8 %             |
| 45Sc (KED)  | 143.343 %             | 0.5 %             |
| 51V (KED)   | 1.686 ppb             | 2.0 %             |
| 52Cr (KED)  | 3.185 ppb             | 1.4 %             |
| 55Mn (KED)  | 20.280 ppb            | 1.2 %             |
| 56Fe (KED)  | 889.027 ppb           | 0.5 %             |
| 58Ni (KED)  | 3.872 ppb             | 2.6 %             |
| 59Co (KED)  | 0.389 ppb             | 4.6 %             |
| 63Cu (KED)  | 7.447 ppb             | 0.5 %             |
| 64Zn (KED)  | 180.617 ppb           | 1.4 %             |
| 69Ga (KED)  | 2.470 ppb             | 2.8 %             |
| 75As (KED)  | 0.886 ppb             | 4.8 %             |
| 80Se (KED)  | 0.154 ppb             | 129.7 %           |
| 85Rb (KED)  | 3.603 ppb             | 0.6 %             |
| 88Sr (KED)  | 8.374 ppb             | 1.6 %             |
| 89Y (KED)   | 107.973 %             | 1.4 %             |
| 107Ag (KED) | 0.128 ppb             | 1.9 %             |
| 114Cd (KED) | 0.026 ppb             | 8.5 %             |
| 115In (KED) | 92.438 %              | 0.4 %             |
| 133Cs (KED) | 0.237 ppb             | 3.9 %             |
| 138Ba (KED) | 8.180 ppb             | 1.1 %             |
| 139La (KED) | 0.828 ppb             | 4.3 %             |
| 140Ce (KED) | 1.708 ppb             | 2.8 %             |
| 141Pr (KED) | 0.198 ppb             | 2.8 %             |
| 142Nd (KED) | 1.056 ppb             | 0.6 %             |
| 152Sm (KED) | 0.150 ppb             | 3.6 %             |
| 153Eu (KED) | 0.032 ppb             | 5.4 %             |
| 158Gd (KED) | 0.128 ppb             | 2.3 %             |
| 159Tb (KED) | 89.248 %              | 1.4 %             |
| 164Dy (KED) | 0.093 ppb             | 4.1 %             |
| 166Er (KED) | 0.048 ppb             | 0.6 %             |
| 169Tm (KED) | 0.009 ppb             | 3.2 %             |
| 174Yb (KED) | 0.041 ppb             | 2.0 %             |
| 175Lu (KED) | -0.012 ppb            | 33.9 %            |
| 205Tl (KED) | 0.019 ppb             | 5.8 %             |
| 208Pb (KED) | 0.583 ppb             | 5.1 %             |
| 209Bi (KED) | 71.324 %              | 0.6 %             |
| 232Th (KED) | 0.249 ppb             | 1.3 %             |
| 238U (KED)  | 0.069 ppb             | 3.0 %             |

| Category   | Concentration average | Intensity average | Intensity RSD |
|------------|-----------------------|-------------------|---------------|
| 6Li (KED)  | 149.482 %             | 3,478 cps         | 1.1 %         |
| 9Be (KED)  | 0.029 ppb             | 7 cps             | 50.0 %        |
| 11B (KED)  | -54.786 ppb           | 540 cps           | 0.0 %         |
| 24Mg (KED) | 619.340 ppb           | 389,878 cps       | 1.5 %         |
| 27Al (KED) | 949.800 ppb           | 134,888 cps       | 1.5 %         |

# Comprehensive

9/2/2021 5:36:52 PM

| Category    | Concentration average | Intensity average | Intensity RSD |
|-------------|-----------------------|-------------------|---------------|
| 45Sc (KED)  | 143.343 %             | 51,015 cps        | 0.5 %         |
| 51V (KED)   | 1.686 ppb             | 15,539 cps        | 1.6 %         |
| 52Cr (KED)  | 3.185 ppb             | 46,912 cps        | 1.0 %         |
| 55Mn (KED)  | 20.280 ppb            | 146,960 cps       | 1.0 %         |
| 56Fe (KED)  | 889.027 ppb           | 11,224,773 cps    | 0.3 %         |
| 58Ni (KED)  | 3.872 ppb             | 68,050 cps        | 2.2 %         |
| 59Co (KED)  | 0.389 ppb             | 10,885 cps        | 4.1 %         |
| 63Cu (KED)  | 7.447 ppb             | 123,397 cps       | 1.0 %         |
| 64Zn (KED)  | 180.617 ppb           | 783,922 cps       | 0.7 %         |
| 69Ga (KED)  | 2.470 ppb             | 14,066 cps        | 2.2 %         |
| 75As (KED)  | 0.886 ppb             | 1,149 cps         | 3.4 %         |
| 80Se (KED)  | 0.154 ppb             | 1,257 cps         | 5.6 %         |
| 85Rb (KED)  | 3.603 ppb             | 20,161 cps        | 1.3 %         |
| 88Sr (KED)  | 8.374 ppb             | 68,027 cps        | 0.9 %         |
| 89Y (KED)   | 107.973 %             | 416,327 cps       | 1.4 %         |
| 107Ag (KED) | 0.128 ppb             | 5,869 cps         | 2.2 %         |
| 114Cd (KED) | 0.026 ppb             | 1,232 cps         | 3.4 %         |
| 115In (KED) | 92.438 %              | 735,521 cps       | 0.4 %         |
| 133Cs (KED) | 0.237 ppb             | 6,782 cps         | 3.6 %         |
| 138Ba (KED) | 8.180 ppb             | 316,413 cps       | 0.8 %         |
| 139La (KED) | 0.828 ppb             | 62,962 cps        | 3.4 %         |
| 140Ce (KED) | 1.708 ppb             | 175,618 cps       | 1.4 %         |
| 141Pr (KED) | 0.198 ppb             | 21,546 cps        | 3.1 %         |
| 142Nd (KED) | 1.056 ppb             | 46,564 cps        | 0.8 %         |
| 152Sm (KED) | 0.150 ppb             | 6,267 cps         | 3.2 %         |
| 153Eu (KED) | 0.032 ppb             | 2,671 cps         | 4.3 %         |
| 158Gd (KED) | 0.128 ppb             | 7,461 cps         | 1.4 %         |
| 159Tb (KED) | 89.248 %              | 4,036,283 cps     | 1.4 %         |
| 164Dy (KED) | 0.093 ppb             | 6,254 cps         | 3.5 %         |
| 166Er (KED) | 0.048 ppb             | 4,256 cps         | 0.9 %         |
| 169Tm (KED) | 0.009 ppb             | 2,455 cps         | 2.6 %         |
| 174Yb (KED) | 0.041 ppb             | 4,051 cps         | 0.9 %         |
| 175Lu (KED) | -0.012 ppb            | 23,624 cps        | 2.2 %         |
| 205Tl (KED) | 0.019 ppb             | 3,145 cps         | 5.1 %         |
| 208Pb (KED) | 0.583 ppb             | 140,299 cps       | 1.9 %         |
| 209Bi (KED) | 71.324 %              | 3,180,680 cps     | 0.6 %         |
| 232Th (KED) | 0.249 ppb             | 57,856 cps        | 1.5 %         |
| 238U (KED)  | 0.069 ppb             | 18,764 cps        | 2.4 %         |

# Comprehensive

9/2/2021 5:36:52 PM

## Sample Summary

Instrument ID: iCAP Q

Analysis index: 11

Analysis name: 374jian

Analysis started at: 9/2/2021 4:49:50 PM

User name: WINDOWS-UPCI4ER\Administrator

| Category    | Concentration average | Concentration RSD |
|-------------|-----------------------|-------------------|
| 6Li (KED)   | 150.246 %             | 3.7 %             |
| 9Be (KED)   | -0.003 ppb            | 358.7 %           |
| 11B (KED)   | -50.783 ppb           | 0.3 %             |
| 24Mg (KED)  | 340.654 ppb           | 2.2 %             |
| 27Al (KED)  | 494.098 ppb           | 1.9 %             |
| 45Sc (KED)  | 139.466 %             | 1.3 %             |
| 51V (KED)   | 0.883 ppb             | 4.2 %             |
| 52Cr (KED)  | 3.366 ppb             | 0.3 %             |
| 55Mn (KED)  | 11.074 ppb            | 0.9 %             |
| 56Fe (KED)  | 478.883 ppb           | 2.0 %             |
| 58Ni (KED)  | 2.502 ppb             | 1.6 %             |
| 59Co (KED)  | 0.217 ppb             | 1.1 %             |
| 63Cu (KED)  | 11.155 ppb            | 1.8 %             |
| 64Zn (KED)  | 195.205 ppb           | 0.6 %             |
| 69Ga (KED)  | 1.531 ppb             | 2.3 %             |
| 75As (KED)  | 0.512 ppb             | 4.1 %             |
| 80Se (KED)  | 0.403 ppb             | 52.8 %            |
| 85Rb (KED)  | 2.251 ppb             | 1.5 %             |
| 88Sr (KED)  | 4.935 ppb             | 1.4 %             |
| 89Y (KED)   | 104.225 %             | 1.5 %             |
| 107Ag (KED) | 0.234 ppb             | 3.6 %             |
| 114Cd (KED) | 0.071 ppb             | 4.2 %             |
| 115In (KED) | 92.499 %              | 2.9 %             |
| 133Cs (KED) | 0.117 ppb             | 3.0 %             |
| 138Ba (KED) | 4.969 ppb             | 1.9 %             |
| 139La (KED) | 0.472 ppb             | 2.2 %             |
| 140Ce (KED) | 0.871 ppb             | 2.5 %             |
| 141Pr (KED) | 0.102 ppb             | 1.0 %             |
| 142Nd (KED) | 0.531 ppb             | 1.2 %             |
| 152Sm (KED) | 0.075 ppb             | 8.4 %             |
| 153Eu (KED) | 0.017 ppb             | 3.2 %             |
| 158Gd (KED) | 0.072 ppb             | 3.6 %             |
| 159Tb (KED) | 89.965 %              | 1.7 %             |
| 164Dy (KED) | 0.047 ppb             | 2.6 %             |
| 166Er (KED) | 0.022 ppb             | 9.5 %             |
| 169Tm (KED) | 0.005 ppb             | 2.2 %             |
| 174Yb (KED) | 0.021 ppb             | 1.8 %             |
| 175Lu (KED) | -0.021 ppb            | 2.3 %             |
| 205Tl (KED) | 0.012 ppb             | 2.2 %             |
| 208Pb (KED) | 0.275 ppb             | 4.4 %             |
| 209Bi (KED) | 73.577 %              | 1.1 %             |
| 232Th (KED) | 0.139 ppb             | 2.8 %             |
| 238U (KED)  | 0.043 ppb             | 1.9 %             |

| Category   | Concentration average | Intensity average | Intensity RSD |
|------------|-----------------------|-------------------|---------------|
| 6Li (KED)  | 150.246 %             | 3,496 cps         | 3.7 %         |
| 9Be (KED)  | -0.003 ppb            | 1 cps             | 173.2 %       |
| 11B (KED)  | -50.783 ppb           | 757 cps           | 4.5 %         |
| 24Mg (KED) | 340.654 ppb           | 215,825 cps       | 1.5 %         |
| 27Al (KED) | 494.098 ppb           | 68,737 cps        | 1.1 %         |

# Comprehensive

9/2/2021 5:36:52 PM

| Category    | Concentration average | Intensity average | Intensity RSD |
|-------------|-----------------------|-------------------|---------------|
| 45Sc (KED)  | 139.466 %             | 49,635 cps        | 1.3 %         |
| 51V (KED)   | 0.883 ppb             | 7,970 cps         | 4.0 %         |
| 52Cr (KED)  | 3.366 ppb             | 48,116 cps        | 1.3 %         |
| 55Mn (KED)  | 11.074 ppb            | 78,236 cps        | 1.6 %         |
| 56Fe (KED)  | 478.883 ppb           | 5,912,737 cps     | 3.3 %         |
| 58Ni (KED)  | 2.502 ppb             | 44,129 cps        | 0.2 %         |
| 59Co (KED)  | 0.217 ppb             | 6,001 cps         | 2.3 %         |
| 63Cu (KED)  | 11.155 ppb            | 177,505 cps       | 0.4 %         |
| 64Zn (KED)  | 195.205 ppb           | 817,685 cps       | 0.9 %         |
| 69Ga (KED)  | 1.531 ppb             | 8,470 cps         | 0.8 %         |
| 75As (KED)  | 0.512 ppb             | 646 cps           | 3.1 %         |
| 80Se (KED)  | 0.403 ppb             | 1,301 cps         | 5.3 %         |
| 85Rb (KED)  | 2.251 ppb             | 12,173 cps        | 2.3 %         |
| 88Sr (KED)  | 4.935 ppb             | 38,796 cps        | 1.5 %         |
| 89Y (KED)   | 104.225 %             | 401,874 cps       | 1.5 %         |
| 107Ag (KED) | 0.234 ppb             | 10,688 cps        | 1.9 %         |
| 114Cd (KED) | 0.071 ppb             | 2,026 cps         | 1.9 %         |
| 115In (KED) | 92.499 %              | 736,006 cps       | 2.9 %         |
| 133Cs (KED) | 0.117 ppb             | 3,435 cps         | 2.3 %         |
| 138Ba (KED) | 4.969 ppb             | 195,026 cps       | 0.5 %         |
| 139La (KED) | 0.472 ppb             | 36,304 cps        | 1.0 %         |
| 140Ce (KED) | 0.871 ppb             | 90,604 cps        | 1.5 %         |
| 141Pr (KED) | 0.102 ppb             | 11,183 cps        | 2.7 %         |
| 142Nd (KED) | 0.531 ppb             | 23,679 cps        | 1.6 %         |
| 152Sm (KED) | 0.075 ppb             | 3,173 cps         | 8.4 %         |
| 153Eu (KED) | 0.017 ppb             | 1,461 cps         | 3.9 %         |
| 158Gd (KED) | 0.072 ppb             | 4,216 cps         | 2.7 %         |
| 159Tb (KED) | 89.965 %              | 4,068,684 cps     | 1.7 %         |
| 164Dy (KED) | 0.047 ppb             | 3,209 cps         | 2.8 %         |
| 166Er (KED) | 0.022 ppb             | 2,235 cps         | 7.0 %         |
| 169Tm (KED) | 0.005 ppb             | 1,496 cps         | 3.3 %         |
| 174Yb (KED) | 0.021 ppb             | 2,100 cps         | 3.4 %         |
| 175Lu (KED) | -0.021 ppb            | 22,359 cps        | 1.9 %         |
| 205Tl (KED) | 0.012 ppb             | 2,062 cps         | 1.1 %         |
| 208Pb (KED) | 0.275 ppb             | 108,909 cps       | 1.4 %         |
| 209Bi (KED) | 73.577 %              | 3,281,155 cps     | 1.1 %         |
| 232Th (KED) | 0.139 ppb             | 33,793 cps        | 1.8 %         |
| 238U (KED)  | 0.043 ppb             | 12,348 cps        | 1.1 %         |

# Comprehensive

9/2/2021 5:36:52 PM

## Sample Summary

Instrument ID: iCAP Q

Analysis index: 12

Analysis name: 366jian

Analysis started at: 9/2/2021 4:53:05 PM

User name: WINDOWS-UPCI4ER\Administrator

| Category    | Concentration average | Concentration RSD |
|-------------|-----------------------|-------------------|
| 6Li (KED)   | 145.326 %             | 2.0 %             |
| 9Be (KED)   | 0.044 ppb             | 70.1 %            |
| 11B (KED)   | -54.778 ppb           | 1.2 %             |
| 24Mg (KED)  | 616.642 ppb           | 1.7 %             |
| 27Al (KED)  | 1,041.604 ppb         | 1.3 %             |
| 45Sc (KED)  | 136.563 %             | 1.7 %             |
| 51V (KED)   | 1.763 ppb             | 3.2 %             |
| 52Cr (KED)  | 2.874 ppb             | 1.1 %             |
| 55Mn (KED)  | 22.208 ppb            | 1.6 %             |
| 56Fe (KED)  | 919.992 ppb           | 2.7 %             |
| 58Ni (KED)  | 3.785 ppb             | 3.1 %             |
| 59Co (KED)  | 0.401 ppb             | 3.3 %             |
| 63Cu (KED)  | 8.982 ppb             | 0.7 %             |
| 64Zn (KED)  | 174.076 ppb           | 0.5 %             |
| 69Ga (KED)  | 2.434 ppb             | 1.5 %             |
| 75As (KED)  | 0.723 ppb             | 10.0 %            |
| 80Se (KED)  | 0.392 ppb             | 25.5 %            |
| 85Rb (KED)  | 2.830 ppb             | 2.9 %             |
| 88Sr (KED)  | 9.260 ppb             | 1.6 %             |
| 89Y (KED)   | 105.422 %             | 0.3 %             |
| 107Ag (KED) | 0.052 ppb             | 2.3 %             |
| 114Cd (KED) | 0.040 ppb             | 4.9 %             |
| 115In (KED) | 91.499 %              | 1.0 %             |
| 133Cs (KED) | 0.241 ppb             | 2.0 %             |
| 138Ba (KED) | 7.993 ppb             | 1.4 %             |
| 139La (KED) | 0.772 ppb             | 0.4 %             |
| 140Ce (KED) | 1.604 ppb             | 1.8 %             |
| 141Pr (KED) | 0.185 ppb             | 2.6 %             |
| 142Nd (KED) | 0.996 ppb             | 1.3 %             |
| 152Sm (KED) | 0.139 ppb             | 3.1 %             |
| 153Eu (KED) | 0.028 ppb             | 3.7 %             |
| 158Gd (KED) | 0.127 ppb             | 1.2 %             |
| 159Tb (KED) | 89.440 %              | 0.9 %             |
| 164Dy (KED) | 0.085 ppb             | 3.1 %             |
| 166Er (KED) | 0.041 ppb             | 5.6 %             |
| 169Tm (KED) | 0.006 ppb             | 9.7 %             |
| 174Yb (KED) | 0.036 ppb             | 4.5 %             |
| 175Lu (KED) | -0.020 ppb            | 7.5 %             |
| 205Tl (KED) | 0.019 ppb             | 3.6 %             |
| 208Pb (KED) | 0.453 ppb             | 6.4 %             |
| 209Bi (KED) | 72.838 %              | 0.6 %             |
| 232Th (KED) | 0.253 ppb             | 1.4 %             |
| 238U (KED)  | 0.065 ppb             | 1.4 %             |

| Category   | Concentration average | Intensity average | Intensity RSD |
|------------|-----------------------|-------------------|---------------|
| 6Li (KED)  | 145.326 %             | 3,382 cps         | 2.0 %         |
| 9Be (KED)  | 0.044 ppb             | 9 cps             | 57.3 %        |
| 11B (KED)  | -54.778 ppb           | 526 cps           | 7.2 %         |
| 24Mg (KED) | 616.642 ppb           | 377,327 cps       | 0.4 %         |
| 27Al (KED) | 1,041.604 ppb         | 140,844 cps       | 2.2 %         |

# Comprehensive

9/2/2021 5:36:52 PM

| Category    | Concentration average | Intensity average | Intensity RSD |
|-------------|-----------------------|-------------------|---------------|
| 45Sc (KED)  | 136.563 %             | 48,602 cps        | 1.7 %         |
| 51V (KED)   | 1.763 ppb             | 15,463 cps        | 2.0 %         |
| 52Cr (KED)  | 2.874 ppb             | 40,524 cps        | 0.6 %         |
| 55Mn (KED)  | 22.208 ppb            | 153,273 cps       | 1.0 %         |
| 56Fe (KED)  | 919.992 ppb           | 11,062,162 cps    | 2.0 %         |
| 58Ni (KED)  | 3.785 ppb             | 63,448 cps        | 1.9 %         |
| 59Co (KED)  | 0.401 ppb             | 10,668 cps        | 2.4 %         |
| 63Cu (KED)  | 8.982 ppb             | 144,956 cps       | 1.0 %         |
| 64Zn (KED)  | 174.076 ppb           | 737,862 cps       | 0.8 %         |
| 69Ga (KED)  | 2.434 ppb             | 13,541 cps        | 1.7 %         |
| 75As (KED)  | 0.723 ppb             | 918 cps           | 9.9 %         |
| 80Se (KED)  | 0.392 ppb             | 1,312 cps         | 2.9 %         |
| 85Rb (KED)  | 2.830 ppb             | 15,473 cps        | 3.0 %         |
| 88Sr (KED)  | 9.260 ppb             | 73,429 cps        | 1.7 %         |
| 89Y (KED)   | 105.422 %             | 406,492 cps       | 0.3 %         |
| 107Ag (KED) | 0.052 ppb             | 2,401 cps         | 1.5 %         |
| 114Cd (KED) | 0.040 ppb             | 1,469 cps         | 1.5 %         |
| 115In (KED) | 91.499 %              | 728,051 cps       | 1.0 %         |
| 133Cs (KED) | 0.241 ppb             | 6,815 cps         | 2.7 %         |
| 138Ba (KED) | 7.993 ppb             | 309,946 cps       | 1.9 %         |
| 139La (KED) | 0.772 ppb             | 58,868 cps        | 1.0 %         |
| 140Ce (KED) | 1.604 ppb             | 165,375 cps       | 1.0 %         |
| 141Pr (KED) | 0.185 ppb             | 20,174 cps        | 1.7 %         |
| 142Nd (KED) | 0.996 ppb             | 43,986 cps        | 1.1 %         |
| 152Sm (KED) | 0.139 ppb             | 5,840 cps         | 2.1 %         |
| 153Eu (KED) | 0.028 ppb             | 2,316 cps         | 4.3 %         |
| 158Gd (KED) | 0.127 ppb             | 7,380 cps         | 1.4 %         |
| 159Tb (KED) | 89.440 %              | 4,044,941 cps     | 0.9 %         |
| 164Dy (KED) | 0.085 ppb             | 5,740 cps         | 3.4 %         |
| 166Er (KED) | 0.041 ppb             | 3,768 cps         | 4.0 %         |
| 169Tm (KED) | 0.006 ppb             | 1,703 cps         | 9.1 %         |
| 174Yb (KED) | 0.036 ppb             | 3,509 cps         | 5.3 %         |
| 175Lu (KED) | -0.020 ppb            | 22,526 cps        | 1.3 %         |
| 205Tl (KED) | 0.019 ppb             | 3,116 cps         | 4.0 %         |
| 208Pb (KED) | 0.453 ppb             | 128,316 cps       | 2.1 %         |
| 209Bi (KED) | 72.838 %              | 3,248,195 cps     | 0.6 %         |
| 232Th (KED) | 0.253 ppb             | 60,172 cps        | 1.0 %         |
| 238U (KED)  | 0.065 ppb             | 18,138 cps        | 0.7 %         |

# Comprehensive

9/2/2021 5:36:52 PM

## Sample Summary

Instrument ID: iCAP Q

Analysis index: 13

Analysis name: 370jian

Analysis started at: 9/2/2021 4:56:18 PM

User name: WINDOWS-UPCI4ER\Administrator

| Category    | Concentration average | Concentration RSD |
|-------------|-----------------------|-------------------|
| 6Li (KED)   | 143.941 %             | 3.1 %             |
| 9Be (KED)   | 0.011 ppb             | 189.9 %           |
| 11B (KED)   | -55.411 ppb           | 1.6 %             |
| 24Mg (KED)  | 550.141 ppb           | 4.2 %             |
| 27Al (KED)  | 620.677 ppb           | 0.8 %             |
| 45Sc (KED)  | 137.482 %             | 1.9 %             |
| 51V (KED)   | 1.064 ppb             | 3.7 %             |
| 52Cr (KED)  | 2.587 ppb             | 1.5 %             |
| 55Mn (KED)  | 15.926 ppb            | 2.1 %             |
| 56Fe (KED)  | 584.133 ppb           | 1.6 %             |
| 58Ni (KED)  | 2.725 ppb             | 1.8 %             |
| 59Co (KED)  | 0.278 ppb             | 1.7 %             |
| 63Cu (KED)  | 9.846 ppb             | 0.6 %             |
| 64Zn (KED)  | 190.917 ppb           | 1.0 %             |
| 69Ga (KED)  | 1.852 ppb             | 1.7 %             |
| 75As (KED)  | 0.596 ppb             | 4.5 %             |
| 80Se (KED)  | 0.473 ppb             | 32.4 %            |
| 85Rb (KED)  | 2.895 ppb             | 1.9 %             |
| 88Sr (KED)  | 10.162 ppb            | 3.3 %             |
| 89Y (KED)   | 104.994 %             | 0.4 %             |
| 107Ag (KED) | 0.238 ppb             | 3.2 %             |
| 114Cd (KED) | 0.054 ppb             | 7.3 %             |
| 115In (KED) | 89.884 %              | 0.2 %             |
| 133Cs (KED) | 0.147 ppb             | 3.9 %             |
| 138Ba (KED) | 6.105 ppb             | 2.4 %             |
| 139La (KED) | 0.514 ppb             | 2.1 %             |
| 140Ce (KED) | 1.031 ppb             | 1.3 %             |
| 141Pr (KED) | 0.121 ppb             | 3.0 %             |
| 142Nd (KED) | 0.633 ppb             | 2.6 %             |
| 152Sm (KED) | 0.092 ppb             | 4.1 %             |
| 153Eu (KED) | 0.019 ppb             | 0.4 %             |
| 158Gd (KED) | 0.083 ppb             | 0.2 %             |
| 159Tb (KED) | 89.343 %              | 0.4 %             |
| 164Dy (KED) | 0.054 ppb             | 0.6 %             |
| 166Er (KED) | 0.025 ppb             | 3.2 %             |
| 169Tm (KED) | 0.004 ppb             | 5.2 %             |
| 174Yb (KED) | 0.023 ppb             | 2.2 %             |
| 175Lu (KED) | -0.023 ppb            | 8.2 %             |
| 205Tl (KED) | 0.015 ppb             | 8.4 %             |
| 208Pb (KED) | 0.386 ppb             | 5.8 %             |
| 209Bi (KED) | 71.340 %              | 2.0 %             |
| 232Th (KED) | 0.172 ppb             | 1.6 %             |
| 238U (KED)  | 0.048 ppb             | 3.8 %             |

| Category   | Concentration average | Intensity average | Intensity RSD |
|------------|-----------------------|-------------------|---------------|
| 6Li (KED)  | 143.941 %             | 3,349 cps         | 3.1 %         |
| 9Be (KED)  | 0.011 ppb             | 3 cps             | 100.0 %       |
| 11B (KED)  | -55.411 ppb           | 489 cps           | 12.0 %        |
| 24Mg (KED) | 550.141 ppb           | 333,307 cps       | 1.3 %         |
| 27Al (KED) | 620.677 ppb           | 84,877 cps        | 1.6 %         |

# Comprehensive

9/2/2021 5:36:52 PM

| Category    | Concentration average | Intensity average | Intensity RSD |
|-------------|-----------------------|-------------------|---------------|
| 45Sc (KED)  | 137.482 %             | 48,929 cps        | 1.9 %         |
| 51V (KED)   | 1.064 ppb             | 9,441 cps         | 2.1 %         |
| 52Cr (KED)  | 2.587 ppb             | 36,930 cps        | 0.5 %         |
| 55Mn (KED)  | 15.926 ppb            | 110,736 cps       | 0.7 %         |
| 56Fe (KED)  | 584.133 ppb           | 7,093,745 cps     | 1.0 %         |
| 58Ni (KED)  | 2.725 ppb             | 47,042 cps        | 1.5 %         |
| 59Co (KED)  | 0.278 ppb             | 7,530 cps         | 3.2 %         |
| 63Cu (KED)  | 9.846 ppb             | 158,077 cps       | 1.0 %         |
| 64Zn (KED)  | 190.917 ppb           | 805,742 cps       | 1.4 %         |
| 69Ga (KED)  | 1.852 ppb             | 10,293 cps        | 1.7 %         |
| 75As (KED)  | 0.596 ppb             | 756 cps           | 4.4 %         |
| 80Se (KED)  | 0.473 ppb             | 1,336 cps         | 3.6 %         |
| 85Rb (KED)  | 2.895 ppb             | 15,761 cps        | 1.8 %         |
| 88Sr (KED)  | 10.162 ppb            | 80,223 cps        | 3.0 %         |
| 89Y (KED)   | 104.994 %             | 404,841 cps       | 0.4 %         |
| 107Ag (KED) | 0.238 ppb             | 10,567 cps        | 3.2 %         |
| 114Cd (KED) | 0.054 ppb             | 1,686 cps         | 4.2 %         |
| 115In (KED) | 89.884 %              | 715,197 cps       | 0.2 %         |
| 133Cs (KED) | 0.147 ppb             | 4,150 cps         | 3.6 %         |
| 138Ba (KED) | 6.105 ppb             | 237,264 cps       | 2.4 %         |
| 139La (KED) | 0.514 ppb             | 39,225 cps        | 1.7 %         |
| 140Ce (KED) | 1.031 ppb             | 106,402 cps       | 1.3 %         |
| 141Pr (KED) | 0.121 ppb             | 13,195 cps        | 2.6 %         |
| 142Nd (KED) | 0.633 ppb             | 27,983 cps        | 2.3 %         |
| 152Sm (KED) | 0.092 ppb             | 3,848 cps         | 3.8 %         |
| 153Eu (KED) | 0.019 ppb             | 1,561 cps         | 0.7 %         |
| 158Gd (KED) | 0.083 ppb             | 4,812 cps         | 0.2 %         |
| 159Tb (KED) | 89.343 %              | 4,040,567 cps     | 0.4 %         |
| 164Dy (KED) | 0.054 ppb             | 3,633 cps         | 0.7 %         |
| 166Er (KED) | 0.025 ppb             | 2,485 cps         | 2.6 %         |
| 169Tm (KED) | 0.004 ppb             | 1,212 cps         | 5.4 %         |
| 174Yb (KED) | 0.023 ppb             | 2,246 cps         | 2.4 %         |
| 175Lu (KED) | -0.023 ppb            | 21,938 cps        | 1.7 %         |
| 205Tl (KED) | 0.015 ppb             | 2,489 cps         | 8.1 %         |
| 208Pb (KED) | 0.386 ppb             | 118,062 cps       | 0.9 %         |
| 209Bi (KED) | 71.340 %              | 3,181,370 cps     | 2.0 %         |
| 232Th (KED) | 0.172 ppb             | 40,279 cps        | 2.1 %         |
| 238U (KED)  | 0.048 ppb             | 13,325 cps        | 1.6 %         |

# Comprehensive

9/2/2021 5:36:52 PM

## Sample Summary

Instrument ID: iCAP Q

Analysis index: 14

Analysis name: 392jian

Analysis started at: 9/2/2021 4:59:40 PM

User name: WINDOWS-UPCI4ER\Administrator

| Category    | Concentration average | Concentration RSD |
|-------------|-----------------------|-------------------|
| 6Li (KED)   | 146.902 %             | 3.0 %             |
| 9Be (KED)   | 0.031 ppb             | 69.5 %            |
| 11B (KED)   | -56.043 ppb           | 1.6 %             |
| 24Mg (KED)  | 474.690 ppb           | 3.3 %             |
| 27Al (KED)  | 723.975 ppb           | 0.6 %             |
| 45Sc (KED)  | 137.999 %             | 1.8 %             |
| 51V (KED)   | 1.166 ppb             | 1.3 %             |
| 52Cr (KED)  | 2.031 ppb             | 1.6 %             |
| 55Mn (KED)  | 16.077 ppb            | 0.9 %             |
| 56Fe (KED)  | 605.954 ppb           | 1.9 %             |
| 58Ni (KED)  | 2.664 ppb             | 1.3 %             |
| 59Co (KED)  | 0.262 ppb             | 1.4 %             |
| 63Cu (KED)  | 7.605 ppb             | 0.6 %             |
| 64Zn (KED)  | 166.187 ppb           | 2.2 %             |
| 69Ga (KED)  | 1.727 ppb             | 2.2 %             |
| 75As (KED)  | 0.714 ppb             | 3.3 %             |
| 80Se (KED)  | 0.593 ppb             | 12.9 %            |
| 85Rb (KED)  | 3.302 ppb             | 0.8 %             |
| 88Sr (KED)  | 7.284 ppb             | 0.2 %             |
| 89Y (KED)   | 105.384 %             | 1.4 %             |
| 107Ag (KED) | 0.058 ppb             | 3.5 %             |
| 114Cd (KED) | 0.058 ppb             | 9.9 %             |
| 115In (KED) | 91.122 %              | 1.5 %             |
| 133Cs (KED) | 0.152 ppb             | 5.1 %             |
| 138Ba (KED) | 5.813 ppb             | 1.5 %             |
| 139La (KED) | 0.623 ppb             | 2.4 %             |
| 140Ce (KED) | 1.268 ppb             | 2.5 %             |
| 141Pr (KED) | 0.147 ppb             | 2.8 %             |
| 142Nd (KED) | 0.774 ppb             | 0.8 %             |
| 152Sm (KED) | 0.106 ppb             | 1.5 %             |
| 153Eu (KED) | 0.021 ppb             | 8.4 %             |
| 158Gd (KED) | 0.095 ppb             | 1.0 %             |
| 159Tb (KED) | 88.827 %              | 1.7 %             |
| 164Dy (KED) | 0.071 ppb             | 2.6 %             |
| 166Er (KED) | 0.036 ppb             | 4.3 %             |
| 169Tm (KED) | 0.006 ppb             | 9.4 %             |
| 174Yb (KED) | 0.031 ppb             | 5.3 %             |
| 175Lu (KED) | -0.018 ppb            | 34.0 %            |
| 205Tl (KED) | 0.014 ppb             | 8.4 %             |
| 208Pb (KED) | 0.387 ppb             | 12.6 %            |
| 209Bi (KED) | 72.820 %              | 1.9 %             |
| 232Th (KED) | 0.199 ppb             | 0.8 %             |
| 238U (KED)  | 0.056 ppb             | 1.4 %             |

| Category   | Concentration average | Intensity average | Intensity RSD |
|------------|-----------------------|-------------------|---------------|
| 6Li (KED)  | 146.902 %             | 3,418 cps         | 3.0 %         |
| 9Be (KED)  | 0.031 ppb             | 7 cps             | 50.0 %        |
| 11B (KED)  | -56.043 ppb           | 466 cps           | 11.5 %        |
| 24Mg (KED) | 474.690 ppb           | 293,677 cps       | 0.3 %         |
| 27Al (KED) | 723.975 ppb           | 99,223 cps        | 2.2 %         |

# Comprehensive

9/2/2021 5:36:52 PM

| Category    | Concentration average | Intensity average | Intensity RSD |
|-------------|-----------------------|-------------------|---------------|
| 45Sc (KED)  | 137.999 %             | 49,113 cps        | 1.8 %         |
| 51V (KED)   | 1.166 ppb             | 10,379 cps        | 1.8 %         |
| 52Cr (KED)  | 2.031 ppb             | 29,551 cps        | 0.8 %         |
| 55Mn (KED)  | 16.077 ppb            | 112,223 cps       | 1.6 %         |
| 56Fe (KED)  | 605.954 ppb           | 7,383,615 cps     | 0.2 %         |
| 58Ni (KED)  | 2.664 ppb             | 46,246 cps        | 0.7 %         |
| 59Co (KED)  | 0.262 ppb             | 7,142 cps         | 1.2 %         |
| 63Cu (KED)  | 7.605 ppb             | 122,961 cps       | 1.6 %         |
| 64Zn (KED)  | 166.187 ppb           | 704,130 cps       | 0.9 %         |
| 69Ga (KED)  | 1.727 ppb             | 9,644 cps         | 1.5 %         |
| 75As (KED)  | 0.714 ppb             | 906 cps           | 3.3 %         |
| 80Se (KED)  | 0.593 ppb             | 1,383 cps         | 1.2 %         |
| 85Rb (KED)  | 3.302 ppb             | 18,033 cps        | 1.1 %         |
| 88Sr (KED)  | 7.284 ppb             | 57,789 cps        | 1.2 %         |
| 89Y (KED)   | 105.384 %             | 406,347 cps       | 1.4 %         |
| 107Ag (KED) | 0.058 ppb             | 2,673 cps         | 3.2 %         |
| 114Cd (KED) | 0.058 ppb             | 1,771 cps         | 4.1 %         |
| 115In (KED) | 91.122 %              | 725,050 cps       | 1.5 %         |
| 133Cs (KED) | 0.152 ppb             | 4,354 cps         | 3.4 %         |
| 138Ba (KED) | 5.813 ppb             | 224,714 cps       | 0.8 %         |
| 139La (KED) | 0.623 ppb             | 47,233 cps        | 0.8 %         |
| 140Ce (KED) | 1.268 ppb             | 129,999 cps       | 1.1 %         |
| 141Pr (KED) | 0.147 ppb             | 15,907 cps        | 2.0 %         |
| 142Nd (KED) | 0.774 ppb             | 33,989 cps        | 1.6 %         |
| 152Sm (KED) | 0.106 ppb             | 4,410 cps         | 2.4 %         |
| 153Eu (KED) | 0.021 ppb             | 1,742 cps         | 9.2 %         |
| 158Gd (KED) | 0.095 ppb             | 5,527 cps         | 1.9 %         |
| 159Tb (KED) | 88.827 %              | 4,017,242 cps     | 1.7 %         |
| 164Dy (KED) | 0.071 ppb             | 4,750 cps         | 2.2 %         |
| 166Er (KED) | 0.036 ppb             | 3,333 cps         | 2.4 %         |
| 169Tm (KED) | 0.006 ppb             | 1,667 cps         | 8.3 %         |
| 174Yb (KED) | 0.031 ppb             | 2,994 cps         | 4.2 %         |
| 175Lu (KED) | -0.018 ppb            | 22,564 cps        | 2.7 %         |
| 205Tl (KED) | 0.014 ppb             | 2,348 cps         | 6.6 %         |
| 208Pb (KED) | 0.387 ppb             | 120,625 cps       | 2.7 %         |
| 209Bi (KED) | 72.820 %              | 3,247,381 cps     | 1.9 %         |
| 232Th (KED) | 0.199 ppb             | 47,498 cps        | 1.8 %         |
| 238U (KED)  | 0.056 ppb             | 15,594 cps        | 2.5 %         |

# Comprehensive

9/2/2021 5:36:52 PM

## Sample Summary

Instrument ID: iCAP Q

Analysis index: 15

Analysis name: 374jian

Analysis started at: 9/2/2021 5:02:57 PM

User name: WINDOWS-UPCI4ER\Administrator

| Category    | Concentration average | Concentration RSD |
|-------------|-----------------------|-------------------|
| 6Li (KED)   | 138.066 %             | 2.6 %             |
| 9Be (KED)   | 0.005 ppb             | 528.8 %           |
| 11B (KED)   | -56.559 ppb           | 1.1 %             |
| 24Mg (KED)  | 326.231 ppb           | 3.7 %             |
| 27Al (KED)  | 450.544 ppb           | 0.9 %             |
| 45Sc (KED)  | 138.607 %             | 2.2 %             |
| 51V (KED)   | 0.794 ppb             | 0.9 %             |
| 52Cr (KED)  | 2.266 ppb             | 2.3 %             |
| 55Mn (KED)  | 9.944 ppb             | 0.9 %             |
| 56Fe (KED)  | 416.583 ppb           | 1.7 %             |
| 58Ni (KED)  | 2.181 ppb             | 2.5 %             |
| 59Co (KED)  | 0.181 ppb             | 1.5 %             |
| 63Cu (KED)  | 10.686 ppb            | 7.2 %             |
| 64Zn (KED)  | 188.146 ppb           | 6.5 %             |
| 69Ga (KED)  | 1.410 ppb             | 17.5 %            |
| 75As (KED)  | 0.521 ppb             | 0.8 %             |
| 80Se (KED)  | 0.686 ppb             | 16.6 %            |
| 85Rb (KED)  | 2.094 ppb             | 1.3 %             |
| 88Sr (KED)  | 4.548 ppb             | 1.3 %             |
| 89Y (KED)   | 99.729 %              | 4.9 %             |
| 107Ag (KED) | 0.195 ppb             | 2.7 %             |
| 114Cd (KED) | 0.044 ppb             | 6.6 %             |
| 115In (KED) | 86.772 %              | 8.3 %             |
| 133Cs (KED) | 0.097 ppb             | 4.9 %             |
| 138Ba (KED) | 4.151 ppb             | 0.6 %             |
| 139La (KED) | 0.435 ppb             | 4.1 %             |
| 140Ce (KED) | 0.935 ppb             | 3.2 %             |
| 141Pr (KED) | 0.097 ppb             | 1.0 %             |
| 142Nd (KED) | 0.545 ppb             | 2.2 %             |
| 152Sm (KED) | 0.068 ppb             | 6.7 %             |
| 153Eu (KED) | 0.013 ppb             | 7.7 %             |
| 158Gd (KED) | 0.060 ppb             | 3.6 %             |
| 159Tb (KED) | 82.908 %              | 8.8 %             |
| 164Dy (KED) | 0.039 ppb             | 7.9 %             |
| 166Er (KED) | 0.018 ppb             | 4.8 %             |
| 169Tm (KED) | 0.004 ppb             | 11.4 %            |
| 174Yb (KED) | 0.017 ppb             | 8.7 %             |
| 175Lu (KED) | -0.026 ppb            | 20.0 %            |
| 205Tl (KED) | 0.009 ppb             | 4.2 %             |
| 208Pb (KED) | 0.186 ppb             | 16.6 %            |
| 209Bi (KED) | 65.909 %              | 12.9 %            |
| 232Th (KED) | 0.158 ppb             | 3.2 %             |
| 238U (KED)  | 0.037 ppb             | 3.1 %             |

| Category   | Concentration average | Intensity average | Intensity RSD |
|------------|-----------------------|-------------------|---------------|
| 6Li (KED)  | 138.066 %             | 3,213 cps         | 2.6 %         |
| 9Be (KED)  | 0.005 ppb             | 2 cps             | 173.2 %       |
| 11B (KED)  | -56.559 ppb           | 412 cps           | 9.6 %         |
| 24Mg (KED) | 326.231 ppb           | 189,950 cps       | 1.3 %         |
| 27Al (KED) | 450.544 ppb           | 62,378 cps        | 1.4 %         |

# Comprehensive

9/2/2021 5:36:52 PM

| Category    | Concentration average | Intensity average | Intensity RSD |
|-------------|-----------------------|-------------------|---------------|
| 45Sc (KED)  | 138.607 %             | 49,330 cps        | 2.2 %         |
| 51V (KED)   | 0.794 ppb             | 7,134 cps         | 3.0 %         |
| 52Cr (KED)  | 2.266 ppb             | 32,869 cps        | 0.8 %         |
| 55Mn (KED)  | 9.944 ppb             | 69,857 cps        | 2.7 %         |
| 56Fe (KED)  | 416.583 ppb           | 5,118,112 cps     | 1.5 %         |
| 58Ni (KED)  | 2.181 ppb             | 38,713 cps        | 3.0 %         |
| 59Co (KED)  | 0.181 ppb             | 5,027 cps         | 3.7 %         |
| 63Cu (KED)  | 10.686 ppb            | 162,430 cps       | 2.3 %         |
| 64Zn (KED)  | 188.146 ppb           | 752,767 cps       | 2.9 %         |
| 69Ga (KED)  | 1.410 ppb             | 7,431 cps         | 12.0 %        |
| 75As (KED)  | 0.521 ppb             | 629 cps           | 4.4 %         |
| 80Se (KED)  | 0.686 ppb             | 1,341 cps         | 6.1 %         |
| 85Rb (KED)  | 2.094 ppb             | 10,833 cps        | 3.7 %         |
| 88Sr (KED)  | 4.548 ppb             | 34,239 cps        | 5.7 %         |
| 89Y (KED)   | 99.729 %              | 384,539 cps       | 4.9 %         |
| 107Ag (KED) | 0.195 ppb             | 8,364 cps         | 5.9 %         |
| 114Cd (KED) | 0.044 ppb             | 1,463 cps         | 6.7 %         |
| 115In (KED) | 86.772 %              | 690,438 cps       | 8.3 %         |
| 133Cs (KED) | 0.097 ppb             | 2,715 cps         | 11.3 %        |
| 138Ba (KED) | 4.151 ppb             | 150,678 cps       | 9.1 %         |
| 139La (KED) | 0.435 ppb             | 30,740 cps        | 4.9 %         |
| 140Ce (KED) | 0.935 ppb             | 89,517 cps        | 7.0 %         |
| 141Pr (KED) | 0.097 ppb             | 9,855 cps         | 9.8 %         |
| 142Nd (KED) | 0.545 ppb             | 22,374 cps        | 8.7 %         |
| 152Sm (KED) | 0.068 ppb             | 2,658 cps         | 15.3 %        |
| 153Eu (KED) | 0.013 ppb             | 1,044 cps         | 15.4 %        |
| 158Gd (KED) | 0.060 ppb             | 3,243 cps         | 12.3 %        |
| 159Tb (KED) | 82.908 %              | 3,749,527 cps     | 8.8 %         |
| 164Dy (KED) | 0.039 ppb             | 2,461 cps         | 15.8 %        |
| 166Er (KED) | 0.018 ppb             | 1,751 cps         | 12.2 %        |
| 169Tm (KED) | 0.004 ppb             | 903 cps           | 19.4 %        |
| 174Yb (KED) | 0.017 ppb             | 1,592 cps         | 15.4 %        |
| 175Lu (KED) | -0.026 ppb            | 19,942 cps        | 11.5 %        |
| 205Tl (KED) | 0.009 ppb             | 1,440 cps         | 13.9 %        |
| 208Pb (KED) | 0.186 ppb             | 88,342 cps        | 13.8 %        |
| 209Bi (KED) | 65.909 %              | 2,939,196 cps     | 12.9 %        |
| 232Th (KED) | 0.158 ppb             | 34,336 cps        | 13.8 %        |
| 238U (KED)  | 0.037 ppb             | 9,596 cps         | 14.9 %        |

# Comprehensive

9/2/2021 5:36:52 PM

## Sample Summary

Instrument ID: iCAP Q

Analysis index: 16

Analysis name: 384jian

Analysis started at: 9/2/2021 5:06:18 PM

User name: WINDOWS-UPCI4ER\Administrator

| Category    | Concentration average | Concentration RSD |
|-------------|-----------------------|-------------------|
| 6Li (KED)   | 136.777 %             | 4.3 %             |
| 9Be (KED)   | 0.019 ppb             | 67.4 %            |
| 11B (KED)   | -53.092 ppb           | 1.3 %             |
| 24Mg (KED)  | 442.191 ppb           | 4.2 %             |
| 27Al (KED)  | 624.535 ppb           | 0.6 %             |
| 45Sc (KED)  | 133.210 %             | 1.3 %             |
| 51V (KED)   | 1.030 ppb             | 4.0 %             |
| 52Cr (KED)  | 2.031 ppb             | 2.1 %             |
| 55Mn (KED)  | 13.839 ppb            | 1.5 %             |
| 56Fe (KED)  | 544.857 ppb           | 2.4 %             |
| 58Ni (KED)  | 2.341 ppb             | 1.9 %             |
| 59Co (KED)  | 0.251 ppb             | 2.4 %             |
| 63Cu (KED)  | 6.044 ppb             | 0.4 %             |
| 64Zn (KED)  | 177.348 ppb           | 1.1 %             |
| 69Ga (KED)  | 1.635 ppb             | 0.6 %             |
| 75As (KED)  | 0.655 ppb             | 2.7 %             |
| 80Se (KED)  | 0.362 ppb             | 85.2 %            |
| 85Rb (KED)  | 2.865 ppb             | 3.1 %             |
| 88Sr (KED)  | 6.346 ppb             | 4.0 %             |
| 89Y (KED)   | 104.801 %             | 0.7 %             |
| 107Ag (KED) | 0.055 ppb             | 1.5 %             |
| 114Cd (KED) | 0.037 ppb             | 14.4 %            |
| 115In (KED) | 90.876 %              | 0.9 %             |
| 133Cs (KED) | 0.135 ppb             | 3.3 %             |
| 138Ba (KED) | 5.455 ppb             | 1.6 %             |
| 139La (KED) | 0.508 ppb             | 0.6 %             |
| 140Ce (KED) | 1.071 ppb             | 0.6 %             |
| 141Pr (KED) | 0.119 ppb             | 1.0 %             |
| 142Nd (KED) | 0.637 ppb             | 1.8 %             |
| 152Sm (KED) | 0.089 ppb             | 1.8 %             |
| 153Eu (KED) | 0.017 ppb             | 5.0 %             |
| 158Gd (KED) | 0.080 ppb             | 4.6 %             |
| 159Tb (KED) | 88.431 %              | 0.3 %             |
| 164Dy (KED) | 0.054 ppb             | 2.8 %             |
| 166Er (KED) | 0.025 ppb             | 3.8 %             |
| 169Tm (KED) | 0.004 ppb             | 1.6 %             |
| 174Yb (KED) | 0.021 ppb             | 5.8 %             |
| 175Lu (KED) | -0.029 ppb            | 14.2 %            |
| 205Tl (KED) | 0.012 ppb             | 2.9 %             |
| 208Pb (KED) | 0.296 ppb             | 6.3 %             |
| 209Bi (KED) | 72.789 %              | 2.4 %             |
| 232Th (KED) | 0.183 ppb             | 3.7 %             |
| 238U (KED)  | 0.042 ppb             | 1.8 %             |

| Category   | Concentration average | Intensity average | Intensity RSD |
|------------|-----------------------|-------------------|---------------|
| 6Li (KED)  | 136.777 %             | 3,183 cps         | 4.3 %         |
| 9Be (KED)  | 0.019 ppb             | 4 cps             | 43.3 %        |
| 11B (KED)  | -53.092 ppb           | 576 cps           | 2.2 %         |
| 24Mg (KED) | 442.191 ppb           | 254,632 cps       | 0.4 %         |
| 27Al (KED) | 624.535 ppb           | 82,747 cps        | 1.1 %         |

# Comprehensive

9/2/2021 5:36:52 PM

| Category    | Concentration average | Intensity average | Intensity RSD |
|-------------|-----------------------|-------------------|---------------|
| 45Sc (KED)  | 133.210 %             | 47,409 cps        | 1.3 %         |
| 51V (KED)   | 1.030 ppb             | 8,858 cps         | 3.2 %         |
| 52Cr (KED)  | 2.031 ppb             | 28,520 cps        | 0.9 %         |
| 55Mn (KED)  | 13.839 ppb            | 93,290 cps        | 0.2 %         |
| 56Fe (KED)  | 544.857 ppb           | 6,414,910 cps     | 1.1 %         |
| 58Ni (KED)  | 2.341 ppb             | 39,670 cps        | 0.8 %         |
| 59Co (KED)  | 0.251 ppb             | 6,605 cps         | 1.0 %         |
| 63Cu (KED)  | 6.044 ppb             | 97,546 cps        | 0.3 %         |
| 64Zn (KED)  | 177.348 ppb           | 747,229 cps       | 0.9 %         |
| 69Ga (KED)  | 1.635 ppb             | 9,086 cps         | 1.3 %         |
| 75As (KED)  | 0.655 ppb             | 828 cps           | 2.5 %         |
| 80Se (KED)  | 0.362 ppb             | 1,293 cps         | 7.8 %         |
| 85Rb (KED)  | 2.865 ppb             | 15,568 cps        | 2.6 %         |
| 88Sr (KED)  | 6.346 ppb             | 50,102 cps        | 4.1 %         |
| 89Y (KED)   | 104.801 %             | 404,096 cps       | 0.7 %         |
| 107Ag (KED) | 0.055 ppb             | 2,539 cps         | 0.7 %         |
| 114Cd (KED) | 0.037 ppb             | 1,411 cps         | 6.7 %         |
| 115In (KED) | 90.876 %              | 723,096 cps       | 0.9 %         |
| 133Cs (KED) | 0.135 ppb             | 3,863 cps         | 2.3 %         |
| 138Ba (KED) | 5.455 ppb             | 210,186 cps       | 1.8 %         |
| 139La (KED) | 0.508 ppb             | 38,404 cps        | 0.6 %         |
| 140Ce (KED) | 1.071 ppb             | 109,406 cps       | 0.3 %         |
| 141Pr (KED) | 0.119 ppb             | 12,785 cps        | 0.7 %         |
| 142Nd (KED) | 0.637 ppb             | 27,876 cps        | 2.1 %         |
| 152Sm (KED) | 0.089 ppb             | 3,697 cps         | 1.5 %         |
| 153Eu (KED) | 0.017 ppb             | 1,419 cps         | 5.3 %         |
| 158Gd (KED) | 0.080 ppb             | 4,615 cps         | 4.8 %         |
| 159Tb (KED) | 88.431 %              | 3,999,324 cps     | 0.3 %         |
| 164Dy (KED) | 0.054 ppb             | 3,574 cps         | 2.7 %         |
| 166Er (KED) | 0.025 ppb             | 2,446 cps         | 2.8 %         |
| 169Tm (KED) | 0.004 ppb             | 1,138 cps         | 1.2 %         |
| 174Yb (KED) | 0.021 ppb             | 2,085 cps         | 5.2 %         |
| 175Lu (KED) | -0.029 ppb            | 20,750 cps        | 2.9 %         |
| 205Tl (KED) | 0.012 ppb             | 1,928 cps         | 4.1 %         |
| 208Pb (KED) | 0.296 ppb             | 110,185 cps       | 1.3 %         |
| 209Bi (KED) | 72.789 %              | 3,245,992 cps     | 2.4 %         |
| 232Th (KED) | 0.183 ppb             | 43,642 cps        | 1.3 %         |
| 238U (KED)  | 0.042 ppb             | 11,966 cps        | 3.8 %         |

# Comprehensive

9/2/2021 5:36:52 PM

## Sample Summary

Instrument ID: iCAP Q

Analysis index: 17

Analysis name: 376jian

Analysis started at: 9/2/2021 5:09:43 PM

User name: WINDOWS-UPCI4ER\Administrator

| Category    | Concentration average | Concentration RSD |
|-------------|-----------------------|-------------------|
| 6Li (KED)   | 136.203 %             | 1.6 %             |
| 9Be (KED)   | 0.026 ppb             | 48.0 %            |
| 11B (KED)   | -50.458 ppb           | 2.3 %             |
| 24Mg (KED)  | 400.319 ppb           | 2.2 %             |
| 27Al (KED)  | 650.311 ppb           | 1.0 %             |
| 45Sc (KED)  | 131.769 %             | 1.0 %             |
| 51V (KED)   | 1.022 ppb             | 1.4 %             |
| 52Cr (KED)  | 2.374 ppb             | 0.8 %             |
| 55Mn (KED)  | 13.932 ppb            | 0.5 %             |
| 56Fe (KED)  | 536.214 ppb           | 1.7 %             |
| 58Ni (KED)  | 2.527 ppb             | 1.9 %             |
| 59Co (KED)  | 0.285 ppb             | 1.4 %             |
| 63Cu (KED)  | 7.172 ppb             | 2.9 %             |
| 64Zn (KED)  | 168.705 ppb           | 2.9 %             |
| 69Ga (KED)  | 1.620 ppb             | 4.3 %             |
| 75As (KED)  | 0.732 ppb             | 8.8 %             |
| 80Se (KED)  | 0.333 ppb             | 45.0 %            |
| 85Rb (KED)  | 1.805 ppb             | 1.0 %             |
| 88Sr (KED)  | 6.323 ppb             | 1.7 %             |
| 89Y (KED)   | 102.266 %             | 2.0 %             |
| 107Ag (KED) | 0.044 ppb             | 8.7 %             |
| 114Cd (KED) | 0.024 ppb             | 6.0 %             |
| 115In (KED) | 91.354 %              | 1.2 %             |
| 133Cs (KED) | 0.147 ppb             | 2.9 %             |
| 138Ba (KED) | 5.395 ppb             | 1.3 %             |
| 139La (KED) | 0.468 ppb             | 1.3 %             |
| 140Ce (KED) | 0.973 ppb             | 0.2 %             |
| 141Pr (KED) | 0.110 ppb             | 1.6 %             |
| 142Nd (KED) | 0.592 ppb             | 0.7 %             |
| 152Sm (KED) | 0.080 ppb             | 3.0 %             |
| 153Eu (KED) | 0.016 ppb             | 6.9 %             |
| 158Gd (KED) | 0.071 ppb             | 2.5 %             |
| 159Tb (KED) | 89.282 %              | 0.7 %             |
| 164Dy (KED) | 0.050 ppb             | 3.4 %             |
| 166Er (KED) | 0.025 ppb             | 3.6 %             |
| 169Tm (KED) | 0.004 ppb             | 3.6 %             |
| 174Yb (KED) | 0.021 ppb             | 4.2 %             |
| 175Lu (KED) | -0.024 ppb            | 12.4 %            |
| 205Tl (KED) | 0.012 ppb             | 2.3 %             |
| 208Pb (KED) | 0.306 ppb             | 6.8 %             |
| 209Bi (KED) | 73.374 %              | 0.6 %             |
| 232Th (KED) | 0.170 ppb             | 1.1 %             |
| 238U (KED)  | 0.043 ppb             | 2.8 %             |

| Category   | Concentration average | Intensity average | Intensity RSD |
|------------|-----------------------|-------------------|---------------|
| 6Li (KED)  | 136.203 %             | 3,169 cps         | 1.6 %         |
| 9Be (KED)  | 0.026 ppb             | 6 cps             | 34.6 %        |
| 11B (KED)  | -50.458 ppb           | 701 cps           | 7.2 %         |
| 24Mg (KED) | 400.319 ppb           | 229,856 cps       | 0.9 %         |
| 27Al (KED) | 650.311 ppb           | 85,189 cps        | 0.4 %         |

# Comprehensive

9/2/2021 5:36:52 PM

| Category    | Concentration average | Intensity average | Intensity RSD |
|-------------|-----------------------|-------------------|---------------|
| 45Sc (KED)  | 131.769 %             | 46,896 cps        | 1.0 %         |
| 51V (KED)   | 1.022 ppb             | 8,696 cps         | 0.4 %         |
| 52Cr (KED)  | 2.374 ppb             | 32,654 cps        | 1.7 %         |
| 55Mn (KED)  | 13.932 ppb            | 92,907 cps        | 0.5 %         |
| 56Fe (KED)  | 536.214 ppb           | 6,246,952 cps     | 1.8 %         |
| 58Ni (KED)  | 2.527 ppb             | 42,072 cps        | 1.6 %         |
| 59Co (KED)  | 0.285 ppb             | 7,382 cps         | 0.7 %         |
| 63Cu (KED)  | 7.172 ppb             | 112,578 cps       | 1.1 %         |
| 64Zn (KED)  | 168.705 ppb           | 693,487 cps       | 1.0 %         |
| 69Ga (KED)  | 1.620 ppb             | 8,784 cps         | 2.4 %         |
| 75As (KED)  | 0.732 ppb             | 901 cps           | 9.8 %         |
| 80Se (KED)  | 0.333 ppb             | 1,252 cps         | 3.2 %         |
| 85Rb (KED)  | 1.805 ppb             | 9,585 cps         | 1.4 %         |
| 88Sr (KED)  | 6.323 ppb             | 48,715 cps        | 3.0 %         |
| 89Y (KED)   | 102.266 %             | 394,323 cps       | 2.0 %         |
| 107Ag (KED) | 0.044 ppb             | 2,045 cps         | 7.5 %         |
| 114Cd (KED) | 0.024 ppb             | 1,185 cps         | 2.8 %         |
| 115In (KED) | 91.354 %              | 726,896 cps       | 1.2 %         |
| 133Cs (KED) | 0.147 ppb             | 4,222 cps         | 1.7 %         |
| 138Ba (KED) | 5.395 ppb             | 209,892 cps       | 0.6 %         |
| 139La (KED) | 0.468 ppb             | 35,678 cps        | 0.6 %         |
| 140Ce (KED) | 0.973 ppb             | 100,412 cps       | 0.8 %         |
| 141Pr (KED) | 0.110 ppb             | 12,030 cps        | 2.1 %         |
| 142Nd (KED) | 0.592 ppb             | 26,153 cps        | 1.4 %         |
| 152Sm (KED) | 0.080 ppb             | 3,353 cps         | 2.7 %         |
| 153Eu (KED) | 0.016 ppb             | 1,336 cps         | 6.8 %         |
| 158Gd (KED) | 0.071 ppb             | 4,163 cps         | 2.3 %         |
| 159Tb (KED) | 89.282 %              | 4,037,806 cps     | 0.7 %         |
| 164Dy (KED) | 0.050 ppb             | 3,373 cps         | 2.9 %         |
| 166Er (KED) | 0.025 ppb             | 2,470 cps         | 2.3 %         |
| 169Tm (KED) | 0.004 ppb             | 1,131 cps         | 2.8 %         |
| 174Yb (KED) | 0.021 ppb             | 2,050 cps         | 4.6 %         |
| 175Lu (KED) | -0.024 ppb            | 21,798 cps        | 1.8 %         |
| 205Tl (KED) | 0.012 ppb             | 2,017 cps         | 1.9 %         |
| 208Pb (KED) | 0.306 ppb             | 112,165 cps       | 2.7 %         |
| 209Bi (KED) | 73.374 %              | 3,272,083 cps     | 0.6 %         |
| 232Th (KED) | 0.170 ppb             | 40,973 cps        | 1.4 %         |
| 238U (KED)  | 0.043 ppb             | 12,391 cps        | 2.2 %         |

# Comprehensive

9/2/2021 5:36:52 PM

## Sample Summary

Instrument ID: iCAP Q

Analysis index: 18

Analysis name: 390jian

Analysis started at: 9/2/2021 5:13:05 PM

User name: WINDOWS-UPCI4ER\Administrator

| Category    | Concentration average | Concentration RSD |
|-------------|-----------------------|-------------------|
| 6Li (KED)   | 141.457 %             | 4.7 %             |
| 9Be (KED)   | 0.010 ppb             | 340.2 %           |
| 11B (KED)   | -54.920 ppb           | 1.2 %             |
| 24Mg (KED)  | 539.874 ppb           | 5.3 %             |
| 27Al (KED)  | 862.431 ppb           | 3.0 %             |
| 45Sc (KED)  | 127.099 %             | 2.0 %             |
| 51V (KED)   | 1.653 ppb             | 1.7 %             |
| 52Cr (KED)  | 2.496 ppb             | 2.6 %             |
| 55Mn (KED)  | 20.288 ppb            | 1.4 %             |
| 56Fe (KED)  | 866.609 ppb           | 1.9 %             |
| 58Ni (KED)  | 3.573 ppb             | 2.9 %             |
| 59Co (KED)  | 0.376 ppb             | 3.8 %             |
| 63Cu (KED)  | 7.759 ppb             | 2.5 %             |
| 64Zn (KED)  | 158.562 ppb           | 1.7 %             |
| 69Ga (KED)  | 1.935 ppb             | 1.5 %             |
| 75As (KED)  | 0.742 ppb             | 6.7 %             |
| 80Se (KED)  | 0.411 ppb             | 37.1 %            |
| 85Rb (KED)  | 2.673 ppb             | 3.0 %             |
| 88Sr (KED)  | 7.385 ppb             | 0.8 %             |
| 89Y (KED)   | 102.104 %             | 1.9 %             |
| 107Ag (KED) | 0.041 ppb             | 7.0 %             |
| 114Cd (KED) | 0.029 ppb             | 13.6 %            |
| 115In (KED) | 89.991 %              | 1.4 %             |
| 133Cs (KED) | 0.205 ppb             | 5.5 %             |
| 138Ba (KED) | 6.631 ppb             | 0.8 %             |
| 139La (KED) | 0.747 ppb             | 1.9 %             |
| 140Ce (KED) | 1.513 ppb             | 0.9 %             |
| 141Pr (KED) | 0.180 ppb             | 2.4 %             |
| 142Nd (KED) | 0.941 ppb             | 2.9 %             |
| 152Sm (KED) | 0.130 ppb             | 0.6 %             |
| 153Eu (KED) | 0.028 ppb             | 4.6 %             |
| 158Gd (KED) | 0.119 ppb             | 2.8 %             |
| 159Tb (KED) | 90.164 %              | 1.7 %             |
| 164Dy (KED) | 0.084 ppb             | 3.5 %             |
| 166Er (KED) | 0.040 ppb             | 2.2 %             |
| 169Tm (KED) | 0.006 ppb             | 11.3 %            |
| 174Yb (KED) | 0.033 ppb             | 3.7 %             |
| 175Lu (KED) | -0.026 ppb            | 12.8 %            |
| 205Tl (KED) | 0.014 ppb             | 3.1 %             |
| 208Pb (KED) | 0.321 ppb             | 2.8 %             |
| 209Bi (KED) | 74.568 %              | 1.2 %             |
| 232Th (KED) | 0.243 ppb             | 0.9 %             |
| 238U (KED)  | 0.057 ppb             | 2.8 %             |

| Category   | Concentration average | Intensity average | Intensity RSD |
|------------|-----------------------|-------------------|---------------|
| 6Li (KED)  | 141.457 %             | 3,292 cps         | 4.7 %         |
| 9Be (KED)  | 0.010 ppb             | 3 cps             | 173.2 %       |
| 11B (KED)  | -54.920 ppb           | 503 cps           | 2.0 %         |
| 24Mg (KED) | 539.874 ppb           | 321,200 cps       | 0.9 %         |
| 27Al (KED) | 862.431 ppb           | 108,645 cps       | 1.3 %         |

# Comprehensive

9/2/2021 5:36:52 PM

| Category    | Concentration average | Intensity average | Intensity RSD |
|-------------|-----------------------|-------------------|---------------|
| 45Sc (KED)  | 127.099 %             | 45,234 cps        | 2.0 %         |
| 51V (KED)   | 1.653 ppb             | 13,505 cps        | 0.3 %         |
| 52Cr (KED)  | 2.496 ppb             | 33,001 cps        | 1.4 %         |
| 55Mn (KED)  | 20.288 ppb            | 130,346 cps       | 1.3 %         |
| 56Fe (KED)  | 866.609 ppb           | 9,701,271 cps     | 1.0 %         |
| 58Ni (KED)  | 3.573 ppb             | 55,925 cps        | 1.5 %         |
| 59Co (KED)  | 0.376 ppb             | 9,339 cps         | 2.7 %         |
| 63Cu (KED)  | 7.759 ppb             | 121,481 cps       | 1.1 %         |
| 64Zn (KED)  | 158.562 ppb           | 651,017 cps       | 0.3 %         |
| 69Ga (KED)  | 1.935 ppb             | 10,450 cps        | 0.4 %         |
| 75As (KED)  | 0.742 ppb             | 911 cps           | 4.8 %         |
| 80Se (KED)  | 0.411 ppb             | 1,278 cps         | 5.1 %         |
| 85Rb (KED)  | 2.673 ppb             | 14,154 cps        | 2.8 %         |
| 88Sr (KED)  | 7.385 ppb             | 56,757 cps        | 1.1 %         |
| 89Y (KED)   | 102.104 %             | 393,700 cps       | 1.9 %         |
| 107Ag (KED) | 0.041 ppb             | 1,885 cps         | 5.6 %         |
| 114Cd (KED) | 0.029 ppb             | 1,258 cps         | 6.0 %         |
| 115In (KED) | 89.991 %              | 716,055 cps       | 1.4 %         |
| 133Cs (KED) | 0.205 ppb             | 5,735 cps         | 5.3 %         |
| 138Ba (KED) | 6.631 ppb             | 259,787 cps       | 1.9 %         |
| 139La (KED) | 0.747 ppb             | 57,451 cps        | 0.6 %         |
| 140Ce (KED) | 1.513 ppb             | 157,304 cps       | 1.5 %         |
| 141Pr (KED) | 0.180 ppb             | 19,751 cps        | 1.3 %         |
| 142Nd (KED) | 0.941 ppb             | 41,909 cps        | 1.2 %         |
| 152Sm (KED) | 0.130 ppb             | 5,492 cps         | 1.6 %         |
| 153Eu (KED) | 0.028 ppb             | 2,328 cps         | 3.0 %         |
| 158Gd (KED) | 0.119 ppb             | 6,971 cps         | 1.9 %         |
| 159Tb (KED) | 90.164 %              | 4,077,703 cps     | 1.7 %         |
| 164Dy (KED) | 0.084 ppb             | 5,689 cps         | 1.7 %         |
| 166Er (KED) | 0.040 ppb             | 3,715 cps         | 3.3 %         |
| 169Tm (KED) | 0.006 ppb             | 1,702 cps         | 10.5 %        |
| 174Yb (KED) | 0.033 ppb             | 3,300 cps         | 3.5 %         |
| 175Lu (KED) | -0.026 ppb            | 21,658 cps        | 2.0 %         |
| 205Tl (KED) | 0.014 ppb             | 2,457 cps         | 3.9 %         |
| 208Pb (KED) | 0.321 ppb             | 115,799 cps       | 0.2 %         |
| 209Bi (KED) | 74.568 %              | 3,325,355 cps     | 1.2 %         |
| 232Th (KED) | 0.243 ppb             | 59,079 cps        | 0.4 %         |
| 238U (KED)  | 0.057 ppb             | 16,324 cps        | 3.9 %         |

# Comprehensive

9/2/2021 5:36:52 PM

## Sample Summary

Instrument ID: iCAP Q

Analysis index: 19

Analysis name: 388jian

Analysis started at: 9/2/2021 5:16:22 PM

User name: WINDOWS-UPCI4ER\Administrator

| Category    | Concentration average | Concentration RSD |
|-------------|-----------------------|-------------------|
| 6Li (KED)   | 137.923 %             | 1.6 %             |
| 9Be (KED)   | 0.033 ppb             | 64.4 %            |
| 11B (KED)   | -58.087 ppb           | 0.6 %             |
| 24Mg (KED)  | 371.089 ppb           | 1.1 %             |
| 27Al (KED)  | 475.430 ppb           | 1.2 %             |
| 45Sc (KED)  | 128.917 %             | 1.8 %             |
| 51V (KED)   | 0.884 ppb             | 1.1 %             |
| 52Cr (KED)  | 2.668 ppb             | 0.6 %             |
| 55Mn (KED)  | 11.027 ppb            | 1.7 %             |
| 56Fe (KED)  | 513.159 ppb           | 0.9 %             |
| 58Ni (KED)  | 2.281 ppb             | 1.7 %             |
| 59Co (KED)  | 0.206 ppb             | 3.7 %             |
| 63Cu (KED)  | 7.634 ppb             | 0.8 %             |
| 64Zn (KED)  | 178.421 ppb           | 1.4 %             |
| 69Ga (KED)  | 1.230 ppb             | 4.0 %             |
| 75As (KED)  | 0.546 ppb             | 5.8 %             |
| 80Se (KED)  | 0.271 ppb             | 39.3 %            |
| 85Rb (KED)  | 3.230 ppb             | 1.9 %             |
| 88Sr (KED)  | 4.598 ppb             | 0.4 %             |
| 89Y (KED)   | 103.726 %             | 1.1 %             |
| 107Ag (KED) | 0.090 ppb             | 3.1 %             |
| 114Cd (KED) | 0.037 ppb             | 9.2 %             |
| 115In (KED) | 90.285 %              | 2.7 %             |
| 133Cs (KED) | 0.112 ppb             | 2.9 %             |
| 138Ba (KED) | 4.342 ppb             | 1.7 %             |
| 139La (KED) | 0.495 ppb             | 1.2 %             |
| 140Ce (KED) | 0.951 ppb             | 2.6 %             |
| 141Pr (KED) | 0.113 ppb             | 1.6 %             |
| 142Nd (KED) | 0.599 ppb             | 2.1 %             |
| 152Sm (KED) | 0.080 ppb             | 5.9 %             |
| 153Eu (KED) | 0.015 ppb             | 10.7 %            |
| 158Gd (KED) | 0.069 ppb             | 1.2 %             |
| 159Tb (KED) | 90.869 %              | 0.3 %             |
| 164Dy (KED) | 0.047 ppb             | 4.5 %             |
| 166Er (KED) | 0.021 ppb             | 3.7 %             |
| 169Tm (KED) | 0.004 ppb             | 8.0 %             |
| 174Yb (KED) | 0.019 ppb             | 3.6 %             |
| 175Lu (KED) | -0.029 ppb            | 17.0 %            |
| 205Tl (KED) | 0.009 ppb             | 4.7 %             |
| 208Pb (KED) | 0.176 ppb             | 12.3 %            |
| 209Bi (KED) | 75.444 %              | 0.7 %             |
| 232Th (KED) | 0.157 ppb             | 1.3 %             |
| 238U (KED)  | 0.041 ppb             | 4.1 %             |

| Category   | Concentration average | Intensity average | Intensity RSD |
|------------|-----------------------|-------------------|---------------|
| 6Li (KED)  | 137.923 %             | 3,209 cps         | 1.6 %         |
| 9Be (KED)  | 0.033 ppb             | 7 cps             | 50.0 %        |
| 11B (KED)  | -58.087 ppb           | 337 cps           | 6.5 %         |
| 24Mg (KED) | 371.089 ppb           | 215,860 cps       | 1.7 %         |
| 27Al (KED) | 475.430 ppb           | 61,176 cps        | 1.8 %         |

# Comprehensive

9/2/2021 5:36:52 PM

| Category    | Concentration average | Intensity average | Intensity RSD |
|-------------|-----------------------|-------------------|---------------|
| 45Sc (KED)  | 128.917 %             | 45,881 cps        | 1.8 %         |
| 51V (KED)   | 0.884 ppb             | 7,374 cps         | 2.1 %         |
| 52Cr (KED)  | 2.668 ppb             | 35,653 cps        | 2.0 %         |
| 55Mn (KED)  | 11.027 ppb            | 71,997 cps        | 0.4 %         |
| 56Fe (KED)  | 513.159 ppb           | 5,850,953 cps     | 1.0 %         |
| 58Ni (KED)  | 2.281 ppb             | 37,494 cps        | 2.5 %         |
| 59Co (KED)  | 0.206 ppb             | 5,286 cps         | 4.0 %         |
| 63Cu (KED)  | 7.634 ppb             | 121,477 cps       | 1.6 %         |
| 64Zn (KED)  | 178.421 ppb           | 743,968 cps       | 0.3 %         |
| 69Ga (KED)  | 1.230 ppb             | 6,796 cps         | 2.8 %         |
| 75As (KED)  | 0.546 ppb             | 684 cps           | 6.1 %         |
| 80Se (KED)  | 0.271 ppb             | 1,249 cps         | 4.1 %         |
| 85Rb (KED)  | 3.230 ppb             | 17,365 cps        | 0.9 %         |
| 88Sr (KED)  | 4.598 ppb             | 35,992 cps        | 1.4 %         |
| 89Y (KED)   | 103.726 %             | 399,954 cps       | 1.1 %         |
| 107Ag (KED) | 0.090 ppb             | 4,066 cps         | 1.5 %         |
| 114Cd (KED) | 0.037 ppb             | 1,403 cps         | 4.3 %         |
| 115In (KED) | 90.285 %              | 718,388 cps       | 2.7 %         |
| 133Cs (KED) | 0.112 ppb             | 3,223 cps         | 0.6 %         |
| 138Ba (KED) | 4.342 ppb             | 172,584 cps       | 1.9 %         |
| 139La (KED) | 0.495 ppb             | 38,449 cps        | 1.4 %         |
| 140Ce (KED) | 0.951 ppb             | 99,922 cps        | 2.3 %         |
| 141Pr (KED) | 0.113 ppb             | 12,504 cps        | 1.8 %         |
| 142Nd (KED) | 0.599 ppb             | 26,926 cps        | 2.3 %         |
| 152Sm (KED) | 0.080 ppb             | 3,396 cps         | 6.0 %         |
| 153Eu (KED) | 0.015 ppb             | 1,300 cps         | 10.4 %        |
| 158Gd (KED) | 0.069 ppb             | 4,105 cps         | 1.1 %         |
| 159Tb (KED) | 90.869 %              | 4,109,578 cps     | 0.3 %         |
| 164Dy (KED) | 0.047 ppb             | 3,227 cps         | 4.4 %         |
| 166Er (KED) | 0.021 ppb             | 2,215 cps         | 2.7 %         |
| 169Tm (KED) | 0.004 ppb             | 1,039 cps         | 7.9 %         |
| 174Yb (KED) | 0.019 ppb             | 1,976 cps         | 3.3 %         |
| 175Lu (KED) | -0.029 ppb            | 21,340 cps        | 3.7 %         |
| 205Tl (KED) | 0.009 ppb             | 1,613 cps         | 4.0 %         |
| 208Pb (KED) | 0.176 ppb             | 99,881 cps        | 2.0 %         |
| 209Bi (KED) | 75.444 %              | 3,364,398 cps     | 0.7 %         |
| 232Th (KED) | 0.157 ppb             | 39,076 cps        | 1.8 %         |
| 238U (KED)  | 0.041 ppb             | 12,144 cps        | 3.8 %         |

# Comprehensive

9/2/2021 5:36:52 PM

## Sample Summary

Instrument ID: iCAP Q

Analysis index: 20

Analysis name: 368jian

Analysis started at: 9/2/2021 5:19:47 PM

User name: WINDOWS-UPCI4ER\Administrator

| Category    | Concentration average | Concentration RSD |
|-------------|-----------------------|-------------------|
| 6Li (KED)   | 141.935 %             | 1.6 %             |
| 9Be (KED)   | -0.003 ppb            | 400.4 %           |
| 11B (KED)   | -55.592 ppb           | 0.8 %             |
| 24Mg (KED)  | 456.653 ppb           | 0.7 %             |
| 27Al (KED)  | 685.090 ppb           | 0.2 %             |
| 45Sc (KED)  | 132.683 %             | 1.5 %             |
| 51V (KED)   | 1.139 ppb             | 1.6 %             |
| 52Cr (KED)  | 3.316 ppb             | 1.4 %             |
| 55Mn (KED)  | 15.345 ppb            | 1.3 %             |
| 56Fe (KED)  | 619.836 ppb           | 1.2 %             |
| 58Ni (KED)  | 2.771 ppb             | 0.8 %             |
| 59Co (KED)  | 0.318 ppb             | 2.3 %             |
| 63Cu (KED)  | 5.365 ppb             | 2.0 %             |
| 64Zn (KED)  | 170.860 ppb           | 1.0 %             |
| 69Ga (KED)  | 1.844 ppb             | 1.8 %             |
| 75As (KED)  | 0.685 ppb             | 6.1 %             |
| 80Se (KED)  | 0.373 ppb             | 16.1 %            |
| 85Rb (KED)  | 2.258 ppb             | 3.2 %             |
| 88Sr (KED)  | 7.510 ppb             | 1.1 %             |
| 89Y (KED)   | 102.096 %             | 1.1 %             |
| 107Ag (KED) | 0.051 ppb             | 5.9 %             |
| 114Cd (KED) | 0.042 ppb             | 11.7 %            |
| 115In (KED) | 91.779 %              | 1.1 %             |
| 133Cs (KED) | 0.165 ppb             | 4.4 %             |
| 138Ba (KED) | 5.929 ppb             | 1.6 %             |
| 139La (KED) | 0.477 ppb             | 3.5 %             |
| 140Ce (KED) | 1.006 ppb             | 0.8 %             |
| 141Pr (KED) | 0.115 ppb             | 1.8 %             |
| 142Nd (KED) | 0.607 ppb             | 1.9 %             |
| 152Sm (KED) | 0.082 ppb             | 2.0 %             |
| 153Eu (KED) | 0.018 ppb             | 6.9 %             |
| 158Gd (KED) | 0.074 ppb             | 2.3 %             |
| 159Tb (KED) | 91.455 %              | 1.3 %             |
| 164Dy (KED) | 0.053 ppb             | 5.3 %             |
| 166Er (KED) | 0.026 ppb             | 3.7 %             |
| 169Tm (KED) | 0.004 ppb             | 6.1 %             |
| 174Yb (KED) | 0.022 ppb             | 2.6 %             |
| 175Lu (KED) | -0.029 ppb            | 10.6 %            |
| 205Tl (KED) | 0.013 ppb             | 5.8 %             |
| 208Pb (KED) | 0.220 ppb             | 10.2 %            |
| 209Bi (KED) | 76.433 %              | 0.4 %             |
| 232Th (KED) | 0.163 ppb             | 2.3 %             |
| 238U (KED)  | 0.046 ppb             | 2.1 %             |

| Category   | Concentration average | Intensity average | Intensity RSD |
|------------|-----------------------|-------------------|---------------|
| 6Li (KED)  | 141.935 %             | 3,303 cps         | 1.6 %         |
| 9Be (KED)  | -0.003 ppb            | 1 cps             | 173.2 %       |
| 11B (KED)  | -55.592 ppb           | 472 cps           | 5.7 %         |
| 24Mg (KED) | 456.653 ppb           | 273,161 cps       | 0.9 %         |
| 27Al (KED) | 685.090 ppb           | 90,323 cps        | 1.4 %         |

# Comprehensive

9/2/2021 5:36:52 PM

| Category    | Concentration average | Intensity average | Intensity RSD |
|-------------|-----------------------|-------------------|---------------|
| 45Sc (KED)  | 132.683 %             | 47,221 cps        | 1.5 %         |
| 51V (KED)   | 1.139 ppb             | 9,748 cps         | 2.0 %         |
| 52Cr (KED)  | 3.316 ppb             | 45,121 cps        | 1.9 %         |
| 55Mn (KED)  | 15.345 ppb            | 103,000 cps       | 0.4 %         |
| 56Fe (KED)  | 619.836 ppb           | 7,261,262 cps     | 0.3 %         |
| 58Ni (KED)  | 2.771 ppb             | 46,104 cps        | 2.2 %         |
| 59Co (KED)  | 0.318 ppb             | 8,285 cps         | 2.7 %         |
| 63Cu (KED)  | 5.365 ppb             | 84,545 cps        | 1.6 %         |
| 64Zn (KED)  | 170.860 ppb           | 701,420 cps       | 1.5 %         |
| 69Ga (KED)  | 1.844 ppb             | 9,968 cps         | 2.8 %         |
| 75As (KED)  | 0.685 ppb             | 842 cps           | 5.3 %         |
| 80Se (KED)  | 0.373 ppb             | 1,265 cps         | 1.6 %         |
| 85Rb (KED)  | 2.258 ppb             | 11,959 cps        | 2.5 %         |
| 88Sr (KED)  | 7.510 ppb             | 57,717 cps        | 1.4 %         |
| 89Y (KED)   | 102.096 %             | 393,667 cps       | 1.1 %         |
| 107Ag (KED) | 0.051 ppb             | 2,395 cps         | 5.2 %         |
| 114Cd (KED) | 0.042 ppb             | 1,508 cps         | 5.9 %         |
| 115In (KED) | 91.779 %              | 730,276 cps       | 1.1 %         |
| 133Cs (KED) | 0.165 ppb             | 4,743 cps         | 4.5 %         |
| 138Ba (KED) | 5.929 ppb             | 235,924 cps       | 1.4 %         |
| 139La (KED) | 0.477 ppb             | 37,292 cps        | 2.3 %         |
| 140Ce (KED) | 1.006 ppb             | 106,342 cps       | 0.6 %         |
| 141Pr (KED) | 0.115 ppb             | 12,792 cps        | 2.4 %         |
| 142Nd (KED) | 0.607 ppb             | 27,497 cps        | 1.2 %         |
| 152Sm (KED) | 0.082 ppb             | 3,516 cps         | 3.0 %         |
| 153Eu (KED) | 0.018 ppb             | 1,499 cps         | 5.6 %         |
| 158Gd (KED) | 0.074 ppb             | 4,437 cps         | 1.6 %         |
| 159Tb (KED) | 91.455 %              | 4,136,060 cps     | 1.3 %         |
| 164Dy (KED) | 0.053 ppb             | 3,689 cps         | 4.7 %         |
| 166Er (KED) | 0.026 ppb             | 2,561 cps         | 3.0 %         |
| 169Tm (KED) | 0.004 ppb             | 1,010 cps         | 4.6 %         |
| 174Yb (KED) | 0.022 ppb             | 2,256 cps         | 3.0 %         |
| 175Lu (KED) | -0.029 ppb            | 21,451 cps        | 1.1 %         |
| 205Tl (KED) | 0.013 ppb             | 2,287 cps         | 5.9 %         |
| 208Pb (KED) | 0.220 ppb             | 106,535 cps       | 2.6 %         |
| 209Bi (KED) | 76.433 %              | 3,408,518 cps     | 0.4 %         |
| 232Th (KED) | 0.163 ppb             | 40,899 cps        | 1.9 %         |
| 238U (KED)  | 0.046 ppb             | 13,669 cps        | 1.6 %         |

# Comprehensive

9/2/2021 5:36:52 PM

## Sample Summary

Instrument ID: iCAP Q

Analysis index: 21

Analysis name: 382jian

Analysis started at: 9/2/2021 5:23:09 PM

User name: WINDOWS-UPCI4ER\Administrator

| Category    | Concentration average | Concentration RSD |
|-------------|-----------------------|-------------------|
| 6Li (KED)   | 146.568 %             | 2.1 %             |
| 9Be (KED)   | 0.031 ppb             | 67.2 %            |
| 11B (KED)   | -55.004 ppb           | 1.8 %             |
| 24Mg (KED)  | 602.168 ppb           | 1.9 %             |
| 27Al (KED)  | 872.068 ppb           | 2.0 %             |
| 45Sc (KED)  | 132.759 %             | 3.0 %             |
| 51V (KED)   | 1.638 ppb             | 2.9 %             |
| 52Cr (KED)  | 4.568 ppb             | 1.3 %             |
| 55Mn (KED)  | 21.726 ppb            | 2.9 %             |
| 56Fe (KED)  | 889.714 ppb           | 3.2 %             |
| 58Ni (KED)  | 3.781 ppb             | 2.5 %             |
| 59Co (KED)  | 0.451 ppb             | 1.6 %             |
| 63Cu (KED)  | 8.446 ppb             | 2.5 %             |
| 64Zn (KED)  | 153.633 ppb           | 0.7 %             |
| 69Ga (KED)  | 1.941 ppb             | 4.0 %             |
| 75As (KED)  | 0.681 ppb             | 4.7 %             |
| 80Se (KED)  | 0.485 ppb             | 40.3 %            |
| 85Rb (KED)  | 4.336 ppb             | 2.0 %             |
| 88Sr (KED)  | 8.659 ppb             | 1.9 %             |
| 89Y (KED)   | 105.184 %             | 1.2 %             |
| 107Ag (KED) | 0.036 ppb             | 5.0 %             |
| 114Cd (KED) | 0.040 ppb             | 17.2 %            |
| 115In (KED) | 90.971 %              | 1.4 %             |
| 133Cs (KED) | 0.226 ppb             | 1.7 %             |
| 138Ba (KED) | 6.568 ppb             | 1.5 %             |
| 139La (KED) | 0.897 ppb             | 0.5 %             |
| 140Ce (KED) | 1.844 ppb             | 1.8 %             |
| 141Pr (KED) | 0.213 ppb             | 1.5 %             |
| 142Nd (KED) | 1.120 ppb             | 0.7 %             |
| 152Sm (KED) | 0.156 ppb             | 0.5 %             |
| 153Eu (KED) | 0.028 ppb             | 2.5 %             |
| 158Gd (KED) | 0.134 ppb             | 2.1 %             |
| 159Tb (KED) | 89.916 %              | 0.5 %             |
| 164Dy (KED) | 0.091 ppb             | 0.3 %             |
| 166Er (KED) | 0.045 ppb             | 3.5 %             |
| 169Tm (KED) | 0.006 ppb             | 3.8 %             |
| 174Yb (KED) | 0.037 ppb             | 6.4 %             |
| 175Lu (KED) | -0.024 ppb            | 5.8 %             |
| 205Tl (KED) | 0.014 ppb             | 3.8 %             |
| 208Pb (KED) | 0.494 ppb             | 3.6 %             |
| 209Bi (KED) | 73.317 %              | 1.7 %             |
| 232Th (KED) | 0.276 ppb             | 2.8 %             |
| 238U (KED)  | 0.067 ppb             | 0.4 %             |

| Category   | Concentration average | Intensity average | Intensity RSD |
|------------|-----------------------|-------------------|---------------|
| 6Li (KED)  | 146.568 %             | 3,410 cps         | 2.1 %         |
| 9Be (KED)  | 0.031 ppb             | 7 cps             | 50.0 %        |
| 11B (KED)  | -55.004 ppb           | 519 cps           | 12.1 %        |
| 24Mg (KED) | 602.168 ppb           | 371,635 cps       | 1.0 %         |
| 27Al (KED) | 872.068 ppb           | 114,740 cps       | 1.2 %         |

# Comprehensive

9/2/2021 5:36:52 PM

| Category    | Concentration average | Intensity average | Intensity RSD |
|-------------|-----------------------|-------------------|---------------|
| 45Sc (KED)  | 132.759 %             | 47,248 cps        | 3.0 %         |
| 51V (KED)   | 1.638 ppb             | 13,977 cps        | 1.7 %         |
| 52Cr (KED)  | 4.568 ppb             | 61,431 cps        | 1.9 %         |
| 55Mn (KED)  | 21.726 ppb            | 145,709 cps       | 0.3 %         |
| 56Fe (KED)  | 889.714 ppb           | 10,397,455 cps    | 0.4 %         |
| 58Ni (KED)  | 3.781 ppb             | 61,599 cps        | 0.7 %         |
| 59Co (KED)  | 0.451 ppb             | 11,658 cps        | 2.1 %         |
| 63Cu (KED)  | 8.446 ppb             | 136,070 cps       | 1.4 %         |
| 64Zn (KED)  | 153.633 ppb           | 649,976 cps       | 0.6 %         |
| 69Ga (KED)  | 1.941 ppb             | 10,798 cps        | 3.1 %         |
| 75As (KED)  | 0.681 ppb             | 863 cps           | 4.1 %         |
| 80Se (KED)  | 0.485 ppb             | 1,342 cps         | 4.4 %         |
| 85Rb (KED)  | 4.336 ppb             | 23,625 cps        | 0.8 %         |
| 88Sr (KED)  | 8.659 ppb             | 68,520 cps        | 1.8 %         |
| 89Y (KED)   | 105.184 %             | 405,574 cps       | 1.2 %         |
| 107Ag (KED) | 0.036 ppb             | 1,695 cps         | 3.7 %         |
| 114Cd (KED) | 0.040 ppb             | 1,455 cps         | 8.4 %         |
| 115In (KED) | 90.971 %              | 723,849 cps       | 1.4 %         |
| 133Cs (KED) | 0.226 ppb             | 6,374 cps         | 0.5 %         |
| 138Ba (KED) | 6.568 ppb             | 256,619 cps       | 1.2 %         |
| 139La (KED) | 0.897 ppb             | 68,735 cps        | 0.9 %         |
| 140Ce (KED) | 1.844 ppb             | 191,059 cps       | 1.9 %         |
| 141Pr (KED) | 0.213 ppb             | 23,266 cps        | 1.2 %         |
| 142Nd (KED) | 1.120 ppb             | 49,730 cps        | 1.1 %         |
| 152Sm (KED) | 0.156 ppb             | 6,583 cps         | 1.0 %         |
| 153Eu (KED) | 0.028 ppb             | 2,382 cps         | 2.7 %         |
| 158Gd (KED) | 0.134 ppb             | 7,866 cps         | 1.8 %         |
| 159Tb (KED) | 89.916 %              | 4,066,491 cps     | 0.5 %         |
| 164Dy (KED) | 0.091 ppb             | 6,130 cps         | 0.7 %         |
| 166Er (KED) | 0.045 ppb             | 4,091 cps         | 3.6 %         |
| 169Tm (KED) | 0.006 ppb             | 1,760 cps         | 3.7 %         |
| 174Yb (KED) | 0.037 ppb             | 3,616 cps         | 5.8 %         |
| 175Lu (KED) | -0.024 ppb            | 21,930 cps        | 1.0 %         |
| 205Tl (KED) | 0.014 ppb             | 2,277 cps         | 2.6 %         |
| 208Pb (KED) | 0.494 ppb             | 133,919 cps       | 1.7 %         |
| 209Bi (KED) | 73.317 %              | 3,269,560 cps     | 1.7 %         |
| 232Th (KED) | 0.276 ppb             | 65,961 cps        | 2.1 %         |
| 238U (KED)  | 0.067 ppb             | 18,692 cps        | 2.1 %         |

# Comprehensive

9/2/2021 5:36:52 PM

## Sample Summary

Instrument ID: iCAP Q

Analysis index: 22

Analysis name: 380jian

Analysis started at: 9/2/2021 5:26:32 PM

User name: WINDOWS-UPCI4ER\Administrator

| Category    | Concentration average | Concentration RSD |
|-------------|-----------------------|-------------------|
| 6Li (KED)   | 142.842 %             | 1.4 %             |
| 9Be (KED)   | 0.045 ppb             | 70.8 %            |
| 11B (KED)   | -55.119 ppb           | 2.4 %             |
| 24Mg (KED)  | 788.503 ppb           | 0.8 %             |
| 27Al (KED)  | 1,280.831 ppb         | 0.8 %             |
| 45Sc (KED)  | 136.993 %             | 0.2 %             |
| 51V (KED)   | 2.238 ppb             | 0.8 %             |
| 52Cr (KED)  | 3.021 ppb             | 1.2 %             |
| 55Mn (KED)  | 28.478 ppb            | 0.9 %             |
| 56Fe (KED)  | 1,174.282 ppb         | 2.1 %             |
| 58Ni (KED)  | 5.075 ppb             | 0.9 %             |
| 59Co (KED)  | 0.530 ppb             | 1.7 %             |
| 63Cu (KED)  | 9.505 ppb             | 1.1 %             |
| 64Zn (KED)  | 178.054 ppb           | 0.6 %             |
| 69Ga (KED)  | 3.138 ppb             | 2.9 %             |
| 75As (KED)  | 0.974 ppb             | 1.5 %             |
| 80Se (KED)  | 0.359 ppb             | 20.6 %            |
| 85Rb (KED)  | 4.198 ppb             | 0.1 %             |
| 88Sr (KED)  | 11.327 ppb            | 1.6 %             |
| 89Y (KED)   | 107.464 %             | 0.6 %             |
| 107Ag (KED) | 0.258 ppb             | 0.7 %             |
| 114Cd (KED) | 0.048 ppb             | 7.3 %             |
| 115In (KED) | 91.065 %              | 1.8 %             |
| 133Cs (KED) | 0.309 ppb             | 2.9 %             |
| 138Ba (KED) | 10.958 ppb            | 1.7 %             |
| 139La (KED) | 1.068 ppb             | 2.2 %             |
| 140Ce (KED) | 2.164 ppb             | 2.6 %             |
| 141Pr (KED) | 0.254 ppb             | 4.2 %             |
| 142Nd (KED) | 1.312 ppb             | 2.4 %             |
| 152Sm (KED) | 0.191 ppb             | 2.6 %             |
| 153Eu (KED) | 0.038 ppb             | 2.2 %             |
| 158Gd (KED) | 0.163 ppb             | 4.0 %             |
| 159Tb (KED) | 89.356 %              | 1.9 %             |
| 164Dy (KED) | 0.119 ppb             | 5.1 %             |
| 166Er (KED) | 0.059 ppb             | 3.3 %             |
| 169Tm (KED) | 0.008 ppb             | 3.8 %             |
| 174Yb (KED) | 0.049 ppb             | 5.2 %             |
| 175Lu (KED) | -0.022 ppb            | 40.6 %            |
| 205Tl (KED) | 0.022 ppb             | 0.8 %             |
| 208Pb (KED) | 0.783 ppb             | 1.4 %             |
| 209Bi (KED) | 73.434 %              | 1.0 %             |
| 232Th (KED) | 0.346 ppb             | 1.5 %             |
| 238U (KED)  | 0.087 ppb             | 1.3 %             |

| Category   | Concentration average | Intensity average | Intensity RSD |
|------------|-----------------------|-------------------|---------------|
| 6Li (KED)  | 142.842 %             | 3,324 cps         | 1.4 %         |
| 9Be (KED)  | 0.045 ppb             | 9 cps             | 57.3 %        |
| 11B (KED)  | -55.119 ppb           | 499 cps           | 12.9 %        |
| 24Mg (KED) | 788.503 ppb           | 474,085 cps       | 0.6 %         |
| 27Al (KED) | 1,280.831 ppb         | 173,511 cps       | 0.6 %         |

# Comprehensive

9/2/2021 5:36:52 PM

| Category    | Concentration average | Intensity average | Intensity RSD |
|-------------|-----------------------|-------------------|---------------|
| 45Sc (KED)  | 136.993 %             | 48,755 cps        | 0.2 %         |
| 51V (KED)   | 2.238 ppb             | 19,674 cps        | 0.8 %         |
| 52Cr (KED)  | 3.021 ppb             | 42,635 cps        | 1.2 %         |
| 55Mn (KED)  | 28.478 ppb            | 197,093 cps       | 0.7 %         |
| 56Fe (KED)  | 1,174.282 ppb         | 14,149,712 cps    | 1.9 %         |
| 58Ni (KED)  | 5.075 ppb             | 84,082 cps        | 0.8 %         |
| 59Co (KED)  | 0.530 ppb             | 14,106 cps        | 1.6 %         |
| 63Cu (KED)  | 9.505 ppb             | 156,241 cps       | 0.7 %         |
| 64Zn (KED)  | 178.054 ppb           | 769,258 cps       | 0.0 %         |
| 69Ga (KED)  | 3.138 ppb             | 17,753 cps        | 2.3 %         |
| 75As (KED)  | 0.974 ppb             | 1,256 cps         | 0.9 %         |
| 80Se (KED)  | 0.359 ppb             | 1,326 cps         | 1.5 %         |
| 85Rb (KED)  | 4.198 ppb             | 23,373 cps        | 0.6 %         |
| 88Sr (KED)  | 11.327 ppb            | 91,502 cps        | 1.5 %         |
| 89Y (KED)   | 107.464 %             | 414,365 cps       | 0.6 %         |
| 107Ag (KED) | 0.258 ppb             | 11,594 cps        | 2.4 %         |
| 114Cd (KED) | 0.048 ppb             | 1,592 cps         | 2.8 %         |
| 115In (KED) | 91.065 %              | 724,596 cps       | 1.8 %         |
| 133Cs (KED) | 0.309 ppb             | 8,656 cps         | 3.4 %         |
| 138Ba (KED) | 10.958 ppb            | 423,244 cps       | 0.4 %         |
| 139La (KED) | 1.068 ppb             | 81,241 cps        | 2.8 %         |
| 140Ce (KED) | 2.164 ppb             | 222,624 cps       | 0.6 %         |
| 141Pr (KED) | 0.254 ppb             | 27,542 cps        | 2.4 %         |
| 142Nd (KED) | 1.312 ppb             | 57,871 cps        | 0.7 %         |
| 152Sm (KED) | 0.191 ppb             | 8,006 cps         | 1.7 %         |
| 153Eu (KED) | 0.038 ppb             | 3,126 cps         | 1.1 %         |
| 158Gd (KED) | 0.163 ppb             | 9,460 cps         | 2.0 %         |
| 159Tb (KED) | 89.356 %              | 4,041,159 cps     | 1.9 %         |
| 164Dy (KED) | 0.119 ppb             | 7,976 cps         | 3.2 %         |
| 166Er (KED) | 0.059 ppb             | 5,146 cps         | 1.1 %         |
| 169Tm (KED) | 0.008 ppb             | 2,255 cps         | 3.9 %         |
| 174Yb (KED) | 0.049 ppb             | 4,803 cps         | 4.0 %         |
| 175Lu (KED) | -0.022 ppb            | 22,120 cps        | 4.5 %         |
| 205Tl (KED) | 0.022 ppb             | 3,603 cps         | 1.4 %         |
| 208Pb (KED) | 0.783 ppb             | 167,659 cps       | 0.3 %         |
| 209Bi (KED) | 73.434 %              | 3,274,783 cps     | 1.0 %         |
| 232Th (KED) | 0.346 ppb             | 82,431 cps        | 0.8 %         |
| 238U (KED)  | 0.087 ppb             | 24,071 cps        | 1.3 %         |

# Comprehensive

9/2/2021 5:36:52 PM

## Sample Summary

Instrument ID: iCAP Q

Analysis index: 23

Analysis name: 324jian

Analysis started at: 9/2/2021 5:29:51 PM

User name: WINDOWS-UPCI4ER\Administrator

| Category    | Concentration average | Concentration RSD |
|-------------|-----------------------|-------------------|
| 6Li (KED)   | 141.075 %             | 0.6 %             |
| 9Be (KED)   | 0.018 ppb             | 67.8 %            |
| 11B (KED)   | -57.039 ppb           | 0.9 %             |
| 24Mg (KED)  | 284.384 ppb           | 0.5 %             |
| 27Al (KED)  | 330.583 ppb           | 3.2 %             |
| 45Sc (KED)  | 132.649 %             | 2.2 %             |
| 51V (KED)   | 0.578 ppb             | 1.0 %             |
| 52Cr (KED)  | 1.255 ppb             | 4.8 %             |
| 55Mn (KED)  | 7.882 ppb             | 3.5 %             |
| 56Fe (KED)  | 333.733 ppb           | 2.9 %             |
| 58Ni (KED)  | 1.367 ppb             | 2.2 %             |
| 59Co (KED)  | 0.192 ppb             | 3.6 %             |
| 63Cu (KED)  | 6.382 ppb             | 2.2 %             |
| 64Zn (KED)  | 176.796 ppb           | 0.6 %             |
| 69Ga (KED)  | 0.833 ppb             | 5.4 %             |
| 75As (KED)  | 0.263 ppb             | 14.8 %            |
| 80Se (KED)  | 0.419 ppb             | 43.0 %            |
| 85Rb (KED)  | 1.718 ppb             | 1.0 %             |
| 88Sr (KED)  | 5.068 ppb             | 2.1 %             |
| 89Y (KED)   | 102.881 %             | 1.3 %             |
| 107Ag (KED) | 0.030 ppb             | 2.6 %             |
| 114Cd (KED) | 0.043 ppb             | 3.9 %             |
| 115In (KED) | 93.133 %              | 0.8 %             |
| 133Cs (KED) | 0.067 ppb             | 3.2 %             |
| 138Ba (KED) | 2.866 ppb             | 2.4 %             |
| 139La (KED) | 0.279 ppb             | 2.4 %             |
| 140Ce (KED) | 0.573 ppb             | 1.5 %             |
| 141Pr (KED) | 0.066 ppb             | 1.9 %             |
| 142Nd (KED) | 0.349 ppb             | 0.4 %             |
| 152Sm (KED) | 0.047 ppb             | 3.9 %             |
| 153Eu (KED) | 0.009 ppb             | 4.8 %             |
| 158Gd (KED) | 0.039 ppb             | 4.1 %             |
| 159Tb (KED) | 90.900 %              | 0.8 %             |
| 164Dy (KED) | 0.028 ppb             | 3.7 %             |
| 166Er (KED) | 0.012 ppb             | 15.7 %            |
| 169Tm (KED) | 0.002 ppb             | 10.5 %            |
| 174Yb (KED) | 0.011 ppb             | 9.4 %             |
| 175Lu (KED) | -0.031 ppb            | 9.6 %             |
| 205Tl (KED) | 0.006 ppb             | 12.3 %            |
| 208Pb (KED) | 0.041 ppb             | 20.1 %            |
| 209Bi (KED) | 75.680 %              | 2.6 %             |
| 232Th (KED) | 0.091 ppb             | 2.0 %             |
| 238U (KED)  | 0.024 ppb             | 4.1 %             |

| Category   | Concentration average | Intensity average | Intensity RSD |
|------------|-----------------------|-------------------|---------------|
| 6Li (KED)  | 141.075 %             | 3,283 cps         | 0.6 %         |
| 9Be (KED)  | 0.018 ppb             | 4 cps             | 43.3 %        |
| 11B (KED)  | -57.039 ppb           | 397 cps           | 5.9 %         |
| 24Mg (KED) | 284.384 ppb           | 169,399 cps       | 0.4 %         |
| 27Al (KED) | 330.583 ppb           | 44,035 cps        | 1.0 %         |

# Comprehensive

9/2/2021 5:36:52 PM

| Category    | Concentration average | Intensity average | Intensity RSD |
|-------------|-----------------------|-------------------|---------------|
| 45Sc (KED)  | 132.649 %             | 47,209 cps        | 2.2 %         |
| 51V (KED)   | 0.578 ppb             | 4,997 cps         | 2.2 %         |
| 52Cr (KED)  | 1.255 ppb             | 18,302 cps        | 2.4 %         |
| 55Mn (KED)  | 7.882 ppb             | 53,027 cps        | 1.5 %         |
| 56Fe (KED)  | 333.733 ppb           | 3,934,975 cps     | 0.7 %         |
| 58Ni (KED)  | 1.367 ppb             | 24,572 cps        | 0.7 %         |
| 59Co (KED)  | 0.192 ppb             | 5,069 cps         | 2.6 %         |
| 63Cu (KED)  | 6.382 ppb             | 101,007 cps       | 1.3 %         |
| 64Zn (KED)  | 176.796 ppb           | 731,249 cps       | 0.8 %         |
| 69Ga (KED)  | 0.833 ppb             | 4,606 cps         | 4.1 %         |
| 75As (KED)  | 0.263 ppb             | 333 cps           | 14.7 %        |
| 80Se (KED)  | 0.419 ppb             | 1,290 cps         | 4.7 %         |
| 85Rb (KED)  | 1.718 ppb             | 9,182 cps         | 1.1 %         |
| 88Sr (KED)  | 5.068 ppb             | 39,322 cps        | 1.0 %         |
| 89Y (KED)   | 102.881 %             | 396,695 cps       | 1.3 %         |
| 107Ag (KED) | 0.030 ppb             | 1,450 cps         | 2.6 %         |
| 114Cd (KED) | 0.043 ppb             | 1,540 cps         | 2.3 %         |
| 115In (KED) | 93.133 %              | 741,051 cps       | 0.8 %         |
| 133Cs (KED) | 0.067 ppb             | 2,068 cps         | 3.7 %         |
| 138Ba (KED) | 2.866 ppb             | 115,049 cps       | 1.5 %         |
| 139La (KED) | 0.279 ppb             | 21,797 cps        | 2.1 %         |
| 140Ce (KED) | 0.573 ppb             | 60,489 cps        | 1.0 %         |
| 141Pr (KED) | 0.066 ppb             | 7,378 cps         | 1.7 %         |
| 142Nd (KED) | 0.349 ppb             | 15,767 cps        | 1.3 %         |
| 152Sm (KED) | 0.047 ppb             | 2,012 cps         | 4.7 %         |
| 153Eu (KED) | 0.009 ppb             | 762 cps           | 5.5 %         |
| 158Gd (KED) | 0.039 ppb             | 2,310 cps         | 3.2 %         |
| 159Tb (KED) | 90.900 %              | 4,110,984 cps     | 0.8 %         |
| 164Dy (KED) | 0.028 ppb             | 1,967 cps         | 4.4 %         |
| 166Er (KED) | 0.012 ppb             | 1,481 cps         | 9.8 %         |
| 169Tm (KED) | 0.002 ppb             | 634 cps           | 9.0 %         |
| 174Yb (KED) | 0.011 ppb             | 1,161 cps         | 9.6 %         |
| 175Lu (KED) | -0.031 ppb            | 20,988 cps        | 1.7 %         |
| 205Tl (KED) | 0.006 ppb             | 1,121 cps         | 9.4 %         |
| 208Pb (KED) | 0.041 ppb             | 84,034 cps        | 1.5 %         |
| 209Bi (KED) | 75.680 %              | 3,374,932 cps     | 2.6 %         |
| 232Th (KED) | 0.091 ppb             | 23,196 cps        | 1.1 %         |
| 238U (KED)  | 0.024 ppb             | 7,560 cps         | 1.3 %         |

# Comprehensive

9/2/2021 5:36:52 PM

## Sample Summary

Instrument ID: iCAP Q

Analysis index: 24

Analysis name: 328jian

Analysis started at: 9/2/2021 5:33:10 PM

User name: WINDOWS-UPCI4ER\Administrator

| Category    | Concentration average | Concentration RSD |
|-------------|-----------------------|-------------------|
| 6Li (KED)   | 139.308 %             | 3.0 %             |
| 9Be (KED)   | -0.003 ppb            | 405.8 %           |
| 11B (KED)   | -50.863 ppb           | 3.5 %             |
| 24Mg (KED)  | 386.054 ppb           | 2.9 %             |
| 27Al (KED)  | 458.575 ppb           | 2.8 %             |
| 45Sc (KED)  | 132.235 %             | 2.3 %             |
| 51V (KED)   | 0.853 ppb             | 3.4 %             |
| 52Cr (KED)  | 2.264 ppb             | 4.3 %             |
| 55Mn (KED)  | 11.187 ppb            | 1.7 %             |
| 56Fe (KED)  | 475.310 ppb           | 2.9 %             |
| 58Ni (KED)  | 1.994 ppb             | 4.0 %             |
| 59Co (KED)  | 0.209 ppb             | 1.9 %             |
| 63Cu (KED)  | 6.839 ppb             | 0.2 %             |
| 64Zn (KED)  | 206.637 ppb           | 0.7 %             |
| 69Ga (KED)  | 1.257 ppb             | 4.2 %             |
| 75As (KED)  | 0.344 ppb             | 8.9 %             |
| 80Se (KED)  | 0.463 ppb             | 71.2 %            |
| 85Rb (KED)  | 1.889 ppb             | 1.1 %             |
| 88Sr (KED)  | 6.495 ppb             | 0.8 %             |
| 89Y (KED)   | 103.848 %             | 0.2 %             |
| 107Ag (KED) | 0.041 ppb             | 4.3 %             |
| 114Cd (KED) | 0.063 ppb             | 8.1 %             |
| 115In (KED) | 91.011 %              | 2.8 %             |
| 133Cs (KED) | 0.119 ppb             | 2.3 %             |
| 138Ba (KED) | 4.414 ppb             | 2.0 %             |
| 139La (KED) | 0.555 ppb             | 2.2 %             |
| 140Ce (KED) | 1.011 ppb             | 1.4 %             |
| 141Pr (KED) | 0.110 ppb             | 4.0 %             |
| 142Nd (KED) | 0.598 ppb             | 2.2 %             |
| 152Sm (KED) | 0.073 ppb             | 4.9 %             |
| 153Eu (KED) | 0.014 ppb             | 2.7 %             |
| 158Gd (KED) | 0.063 ppb             | 6.4 %             |
| 159Tb (KED) | 91.687 %              | 1.9 %             |
| 164Dy (KED) | 0.042 ppb             | 5.2 %             |
| 166Er (KED) | 0.021 ppb             | 4.2 %             |
| 169Tm (KED) | 0.003 ppb             | 4.5 %             |
| 174Yb (KED) | 0.018 ppb             | 2.4 %             |
| 175Lu (KED) | -0.032 ppb            | 9.4 %             |
| 205Tl (KED) | 0.011 ppb             | 5.7 %             |
| 208Pb (KED) | 0.251 ppb             | 5.4 %             |
| 209Bi (KED) | 75.314 %              | 1.9 %             |
| 232Th (KED) | 0.126 ppb             | 1.0 %             |
| 238U (KED)  | 0.037 ppb             | 2.3 %             |

| Category   | Concentration average | Intensity average | Intensity RSD |
|------------|-----------------------|-------------------|---------------|
| 6Li (KED)  | 139.308 %             | 3,242 cps         | 3.0 %         |
| 9Be (KED)  | -0.003 ppb            | 1 cps             | 173.2 %       |
| 11B (KED)  | -50.863 ppb           | 697 cps           | 11.8 %        |
| 24Mg (KED) | 386.054 ppb           | 226,669 cps       | 0.7 %         |
| 27Al (KED) | 458.575 ppb           | 60,537 cps        | 0.8 %         |

# Comprehensive

9/2/2021 5:36:52 PM

| Category    | Concentration average | Intensity average | Intensity RSD |
|-------------|-----------------------|-------------------|---------------|
| 45Sc (KED)  | 132.235 %             | 47,062 cps        | 2.3 %         |
| 51V (KED)   | 0.853 ppb             | 7,295 cps         | 1.3 %         |
| 52Cr (KED)  | 2.264 ppb             | 31,315 cps        | 1.9 %         |
| 55Mn (KED)  | 11.187 ppb            | 74,913 cps        | 0.9 %         |
| 56Fe (KED)  | 475.310 ppb           | 5,561,417 cps     | 0.6 %         |
| 58Ni (KED)  | 1.994 ppb             | 34,063 cps        | 1.3 %         |
| 59Co (KED)  | 0.209 ppb             | 5,489 cps         | 3.7 %         |
| 63Cu (KED)  | 6.839 ppb             | 109,141 cps       | 0.4 %         |
| 64Zn (KED)  | 206.637 ppb           | 862,355 cps       | 0.7 %         |
| 69Ga (KED)  | 1.257 ppb             | 6,954 cps         | 4.0 %         |
| 75As (KED)  | 0.344 ppb             | 437 cps           | 8.5 %         |
| 80Se (KED)  | 0.463 ppb             | 1,318 cps         | 8.9 %         |
| 85Rb (KED)  | 1.889 ppb             | 10,186 cps        | 1.1 %         |
| 88Sr (KED)  | 6.495 ppb             | 50,804 cps        | 0.7 %         |
| 89Y (KED)   | 103.848 %             | 400,421 cps       | 0.2 %         |
| 107Ag (KED) | 0.041 ppb             | 1,895 cps         | 1.6 %         |
| 114Cd (KED) | 0.063 ppb             | 1,853 cps         | 2.6 %         |
| 115In (KED) | 91.011 %              | 724,166 cps       | 2.8 %         |
| 133Cs (KED) | 0.119 ppb             | 3,426 cps         | 2.4 %         |
| 138Ba (KED) | 4.414 ppb             | 176,934 cps       | 2.0 %         |
| 139La (KED) | 0.555 ppb             | 43,403 cps        | 0.3 %         |
| 140Ce (KED) | 1.011 ppb             | 107,108 cps       | 0.5 %         |
| 141Pr (KED) | 0.110 ppb             | 12,254 cps        | 2.2 %         |
| 142Nd (KED) | 0.598 ppb             | 27,152 cps        | 1.1 %         |
| 152Sm (KED) | 0.073 ppb             | 3,152 cps         | 3.0 %         |
| 153Eu (KED) | 0.014 ppb             | 1,220 cps         | 4.5 %         |
| 158Gd (KED) | 0.063 ppb             | 3,784 cps         | 4.5 %         |
| 159Tb (KED) | 91.687 %              | 4,146,579 cps     | 1.9 %         |
| 164Dy (KED) | 0.042 ppb             | 2,930 cps         | 3.9 %         |
| 166Er (KED) | 0.021 ppb             | 2,228 cps         | 2.3 %         |
| 169Tm (KED) | 0.003 ppb             | 874 cps           | 6.2 %         |
| 174Yb (KED) | 0.018 ppb             | 1,803 cps         | 1.6 %         |
| 175Lu (KED) | -0.032 ppb            | 21,098 cps        | 3.4 %         |
| 205Tl (KED) | 0.011 ppb             | 1,838 cps         | 3.7 %         |
| 208Pb (KED) | 0.251 ppb             | 108,565 cps       | 0.4 %         |
| 209Bi (KED) | 75.314 %              | 3,358,628 cps     | 1.9 %         |
| 232Th (KED) | 0.126 ppb             | 31,544 cps        | 1.3 %         |
| 238U (KED)  | 0.037 ppb             | 10,871 cps        | 0.4 %         |
