# Supplementary material for: Geographic and breed-specific traceability of cashmere via mineral element profiling in Inner Mongolia (Ordos, Chifeng, and Alxa League)
Source: Royal Society of Chemistry journal article supplement (doi:10.1039/d5ra08122j), 2026-01-01
Supplement: d5ra08122j1.zip [file 20210903-a zuo qi yin gen su mu cha gan zha de gai 8+a you qi ba yan gao le wu lan ta la 10+a zuo qi zha de gai 2.pdf › ԭʼ޿/20210903-a zuo qi yin gen su mu cha gan zha de gai 8+a you qi ba yan gao le wu lan ta la 10+a zuo qi zha de gai 2.pdf]

## Instrument Summary:

Instrument ID: iCAP Q  
Serial Number: Undefined

## Labbook Summary:

Path and filename: \_Application Data\Workspace\LabBooks\wlw\20210903-1.imexp  
Labbook created by: Administrator  
Based on template:  
Hardware configuration: iCAPQ1  
Labbook type: eQuant  
Qtegra version (last saved): 2.7.2425.154  
Labbook started: 9/3/2021 3:47:38 PM  
Labbook finished: 9/3/2021 5:11:39 PM

## Method Summary:

| Isotope     | Mode | Dwell time (s) | # of Channels | Spacing | Resolution | IS          |
|-------------|------|----------------|---------------|---------|------------|-------------|
| 6Li (KED)   | KED  | 0.03           | 3             | 0.1     | Normal     |             |
| 9Be (KED)   | KED  | 0.03           | 3             | 0.1     | Normal     | 6Li (KED)   |
| 11B (KED)   | KED  | 0.03           | 3             | 0.1     | Normal     | 6Li (KED)   |
| 24Mg (KED)  | KED  | 0.03           | 3             | 0.1     | Normal     | 6Li (KED)   |
| 27Al (KED)  | KED  | 0.03           | 3             | 0.1     | Normal     | 45Sc (KED)  |
| 45Sc (KED)  | KED  | 0.03           | 3             | 0.1     | Normal     |             |
| 51V (KED)   | KED  | 0.03           | 3             | 0.1     | Normal     | 45Sc (KED)  |
| 52Cr (KED)  | KED  | 0.03           | 3             | 0.1     | Normal     | 45Sc (KED)  |
| 55Mn (KED)  | KED  | 0.03           | 3             | 0.1     | Normal     | 45Sc (KED)  |
| 56Fe (KED)  | KED  | 0.03           | 3             | 0.1     | Normal     | 45Sc (KED)  |
| 58Ni (KED)  | KED  | 0.03           | 3             | 0.1     | Normal     | 45Sc (KED)  |
| 59Co (KED)  | KED  | 0.03           | 3             | 0.1     | Normal     | 45Sc (KED)  |
| 63Cu (KED)  | KED  | 0.03           | 3             | 0.1     | Normal     | 89Y (KED)   |
| 64Zn (KED)  | KED  | 0.03           | 3             | 0.1     | Normal     | 89Y (KED)   |
| 69Ga (KED)  | KED  | 0.03           | 3             | 0.1     | Normal     | 89Y (KED)   |
| 75As (KED)  | KED  | 0.03           | 3             | 0.1     | Normal     | 89Y (KED)   |
| 80Se (KED)  | KED  | 0.03           | 3             | 0.1     | Normal     | 89Y (KED)   |
| 85Rb (KED)  | KED  | 0.03           | 3             | 0.1     | Normal     | 89Y (KED)   |
| 88Sr (KED)  | KED  | 0.03           | 3             | 0.1     | Normal     | 89Y (KED)   |
| 89Y (KED)   | KED  | 0.03           | 3             | 0.1     | Normal     |             |
| 107Ag (KED) | KED  | 0.03           | 3             | 0.1     | Normal     | 115In (KED) |
| 114Cd (KED) | KED  | 0.03           | 3             | 0.1     | Normal     | 115In (KED) |
| 115In (KED) | KED  | 0.03           | 3             | 0.1     | Normal     |             |
| 133Cs (KED) | KED  | 0.03           | 3             | 0.1     | Normal     | 115In (KED) |
| 138Ba (KED) | KED  | 0.03           | 3             | 0.1     | Normal     | 159Tb (KED) |
| 139La (KED) | KED  | 0.03           | 3             | 0.1     | Normal     | 159Tb (KED) |
| 140Ce (KED) | KED  | 0.03           | 3             | 0.1     | Normal     | 159Tb (KED) |
| 141Pr (KED) | KED  | 0.03           | 3             | 0.1     | Normal     | 159Tb (KED) |
| 142Nd (KED) | KED  | 0.03           | 3             | 0.1     | Normal     | 159Tb (KED) |
| 152Sm (KED) | KED  | 0.03           | 3             | 0.1     | Normal     | 159Tb (KED) |
| 153Eu (KED) | KED  | 0.03           | 3             | 0.1     | Normal     | 159Tb (KED) |
| 158Gd (KED) | KED  | 0.03           | 3             | 0.1     | Normal     | 159Tb (KED) |
| 159Tb (KED) | KED  | 0.03           | 3             | 0.1     | Normal     |             |
| 164Dy (KED) | KED  | 0.03           | 3             | 0.1     | Normal     | 159Tb (KED) |
| 166Er (KED) | KED  | 0.03           | 3             | 0.1     | Normal     | 159Tb (KED) |
| 169Tm (KED) | KED  | 0.03           | 3             | 0.1     | Normal     | 159Tb (KED) |
| 174Yb (KED) | KED  | 0.03           | 3             | 0.1     | Normal     | 159Tb (KED) |
| 175Lu (KED) | KED  | 0.03           | 3             | 0.1     | Normal     | 159Tb (KED) |
| 205Tl (KED) | KED  | 0.03           | 3             | 0.1     | Normal     | 209Bi (KED) |
| 208Pb (KED) | KED  | 0.03           | 3             | 0.1     | Normal     | 209Bi (KED) |
| 209Bi (KED) | KED  | 0.03           | 3             | 0.1     | Normal     |             |
| 232Th (KED) | KED  | 0.03           | 3             | 0.1     | Normal     | 209Bi (KED) |
| 238U (KED)  | KED  | 0.03           | 3             | 0.1     | Normal     | 209Bi (KED) |

| Isotope     | Mode | Dwell time (s) | # of Channels | Spacing | Resolution |
|-------------|------|----------------|---------------|---------|------------|
| 6Li (KED)   | KED  | 0.03           | 3             | 0.1     | Normal     |
| 45Sc (KED)  | KED  | 0.03           | 3             | 0.1     | Normal     |
| 89Y (KED)   | KED  | 0.03           | 3             | 0.1     | Normal     |
| 115In (KED) | KED  | 0.03           | 3             | 0.1     | Normal     |
| 159Tb (KED) | KED  | 0.03           | 3             | 0.1     | Normal     |
| 209Bi (KED) | KED  | 0.03           | 3             | 0.1     | Normal     |

| No. of sweeps | Time per sweep[s] | Time per main run[s] |
|---------------|-------------------|----------------------|
| 10            | 3.87              | 38.7                 |

## Calibration Curves:

9Be (KED)

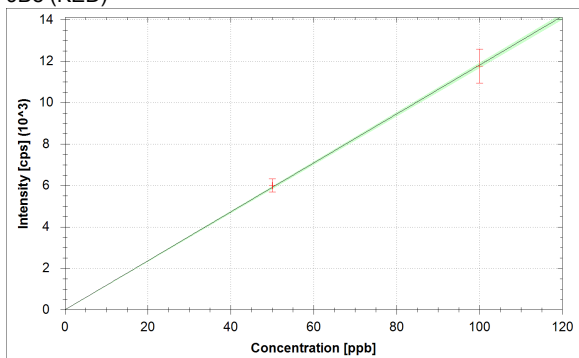

$$f(x) = 118.0565 \cdot x$$

$$R^2 = 0.9999$$

$$\text{BEC} = 0.000 \text{ ppb}$$

$$\text{LoD} = 0.0000 \text{ ppb}$$

11B (KED)

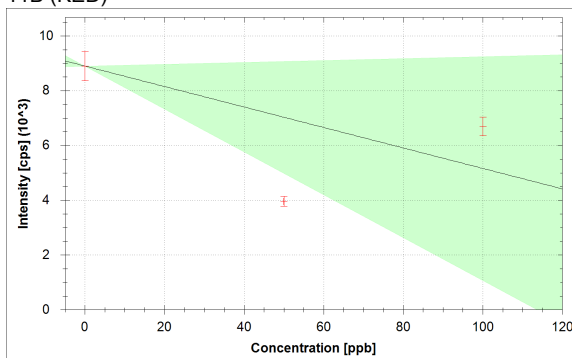

$$f(x) = -37.3909 \cdot x + 8897.1040$$

$$R^2 = 0.0390$$

$$\text{BEC} = -237.948 \text{ ppb}$$

$$\text{LoD} = \text{N/A}$$

24Mg (KED)

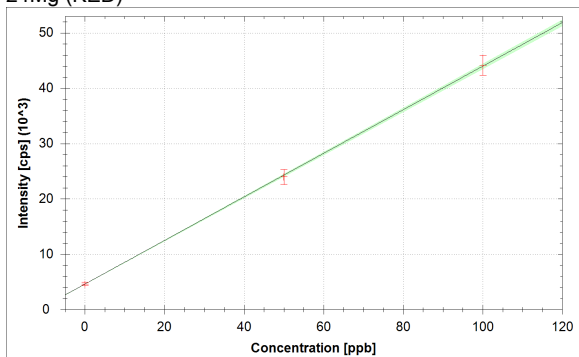

$$f(x) = 393.8311 \cdot x + 4609.8861$$

$$R^2 = 0.9998$$

$$\text{BEC} = 11.705 \text{ ppb}$$

$$\text{LoD} = 2.4225 \text{ ppb}$$

27Al (KED)

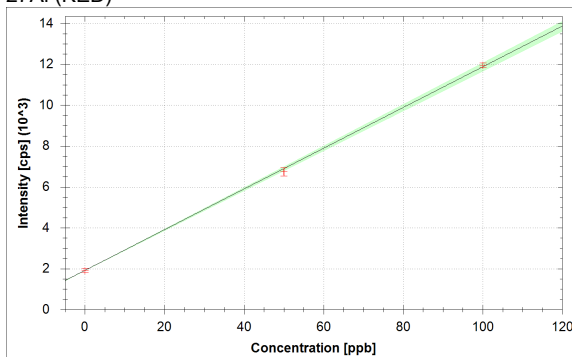

$$f(x) = 99.6117 \cdot x + 1916.4061$$

$$R^2 = 0.9994$$

$$\text{BEC} = 19.239 \text{ ppb}$$

$$\text{LoD} = 3.3690 \text{ ppb}$$

51V (KED)

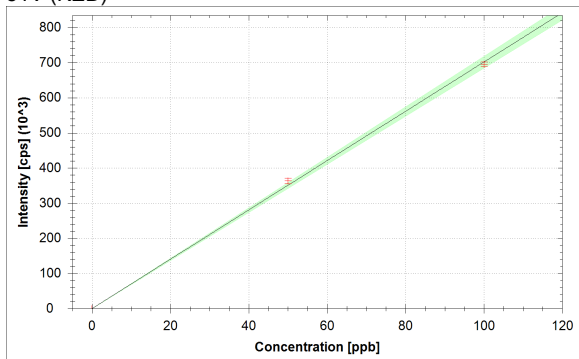

$$f(x) = 7016.6265 \cdot x + 95.4094$$

$$R^2 = 0.9992$$

$$\text{BEC} = 0.014 \text{ ppb}$$

$$\text{LoD} = 0.0090 \text{ ppb}$$

52Cr (KED)

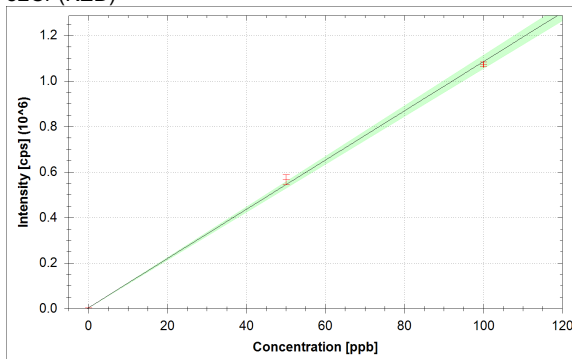

$$f(x) = 10809.5893 \cdot x + 3556.6313$$

$$R^2 = 0.9989$$

$$\text{BEC} = 0.329 \text{ ppb}$$

$$\text{LoD} = 0.0221 \text{ ppb}$$

55Mn (KED)

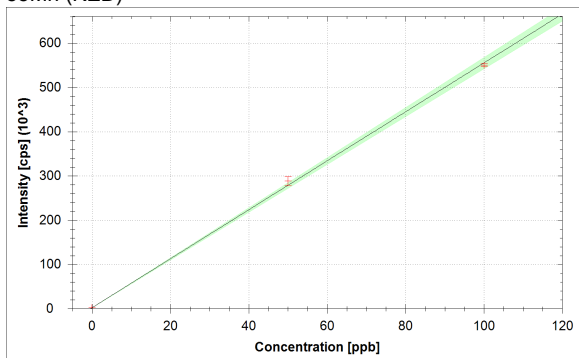

$$f(x) = 5531.1543 \cdot x + 2361.9100$$

$$R^2 = 0.9992$$

$$\text{BEC} = 0.427 \text{ ppb}$$

$$\text{LoD} = 0.0672 \text{ ppb}$$

56Fe (KED)

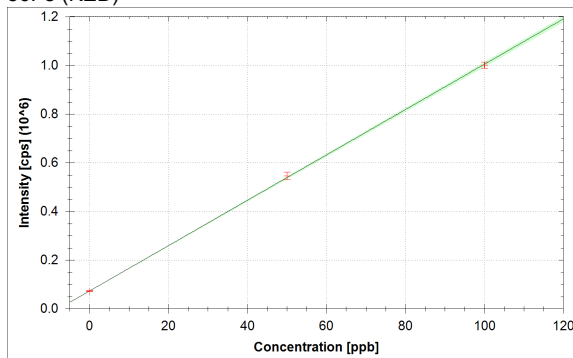

$$f(x) = 9321.3302 \cdot x + 72870.9329$$

$$R^2 = 0.9999$$

$$\text{BEC} = 7.818 \text{ ppb}$$

$$\text{LoD} = 0.5204 \text{ ppb}$$

58Ni (KED)

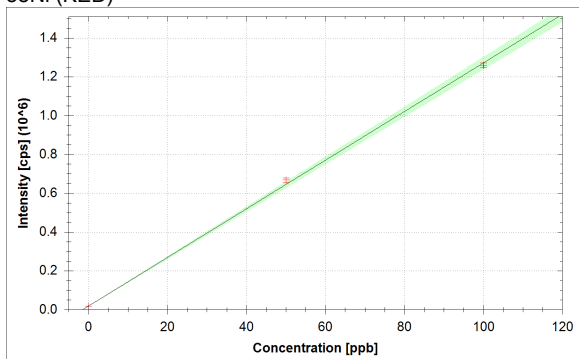

$$f(x) = 12529.1825 \cdot x + 17909.2671$$

$$R^2 = 0.9991$$

$$\text{BEC} = 1.429 \text{ ppb}$$

$$\text{LoD} = 0.0520 \text{ ppb}$$

59Co (KED)

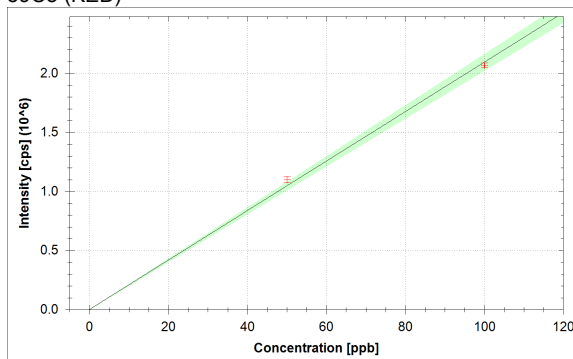

$$f(x) = 20935.3778 \cdot x + 341.4703$$

$$R^2 = 0.9984$$

$$\text{BEC} = 0.016 \text{ ppb}$$

$$\text{LoD} = 0.0076 \text{ ppb}$$

63Cu (KED)

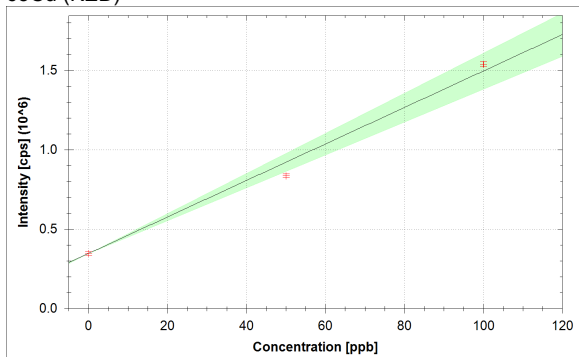

$$f(x) = 11494.1852 \cdot x + 347092.0122$$

$$R^2 = 0.9873$$

$$\text{BEC} = 30.197 \text{ ppb}$$

$$\text{LoD} = 2.8488 \text{ ppb}$$

64Zn (KED)

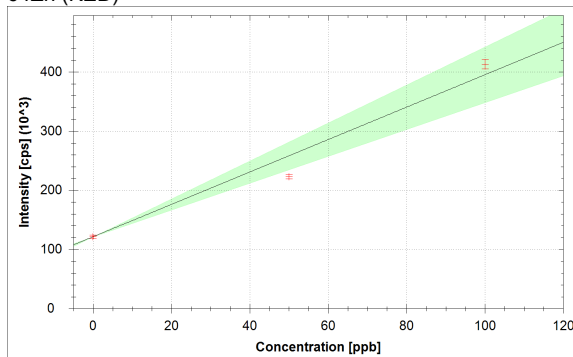

$$f(x) = 2740.8742 \cdot x + 121406.2761$$

$$R^2 = 0.9645$$

$$\text{BEC} = 44.295 \text{ ppb}$$

$$\text{LoD} = 3.2193 \text{ ppb}$$

69Ga (KED)

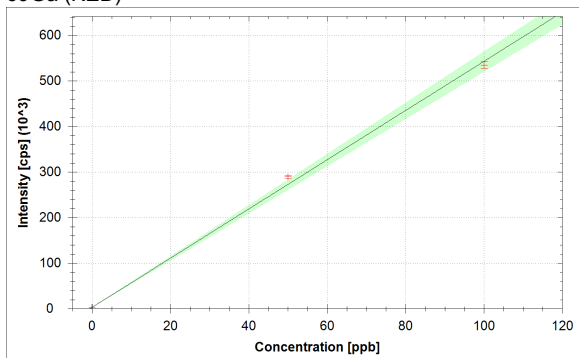

$$f(x) = 5399.4819x + 2950.5744$$

$$R^2 = 0.9977$$

$$\text{BEC} = 0.546 \text{ ppb}$$

$$\text{LoD} = 0.0495 \text{ ppb}$$

75As (KED)

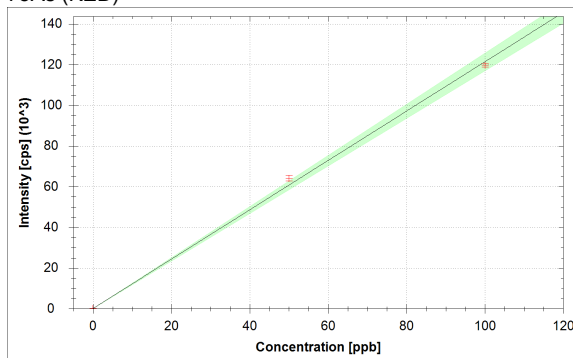

$$f(x) = 1212.7386x + 123.6274$$

$$R^2 = 0.9981$$

$$\text{BEC} = 0.102 \text{ ppb}$$

$$\text{LoD} = 0.0833 \text{ ppb}$$

80Se (KED)

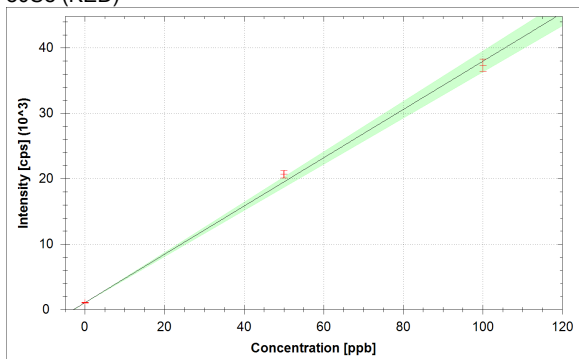

$$f(x) = 368.8344x + 1056.5123$$

$$R^2 = 0.9973$$

$$\text{BEC} = 2.864 \text{ ppb}$$

$$\text{LoD} = 0.5167 \text{ ppb}$$

85Rb (KED)

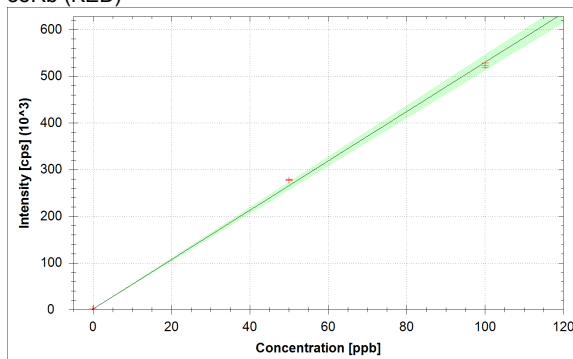

$$f(x) = 5285.1889x + 1261.1236$$

$$R^2 = 0.9986$$

$$\text{BEC} = 0.239 \text{ ppb}$$

$$\text{LoD} = 0.0049 \text{ ppb}$$

88Sr (KED)

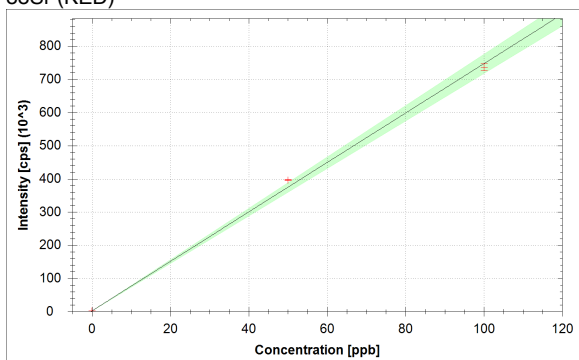

$$f(x) = 7450.7673x + 2301.3304$$

$$R^2 = 0.9978$$

$$\text{BEC} = 0.309 \text{ ppb}$$

$$\text{LoD} = 0.0092 \text{ ppb}$$

107Ag (KED)

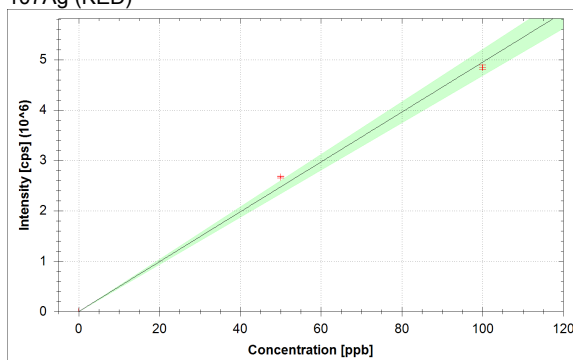

$$f(x) = 49469.7452x + 173.1884$$

$$R^2 = 0.9959$$

$$\text{BEC} = 0.004 \text{ ppb}$$

$$\text{LoD} = 0.0019 \text{ ppb}$$

114Cd (KED)

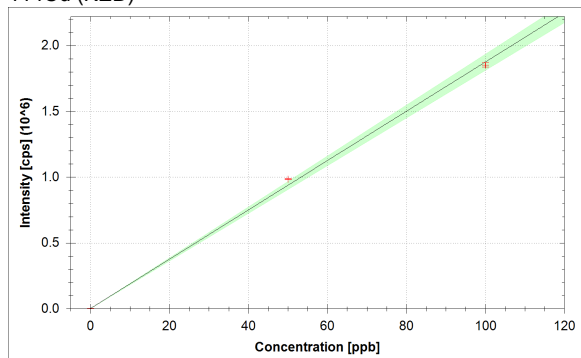

$$f(x) = 18726.2116 \cdot x + 1776.6081$$

$$R^2 = 0.9984$$

$$\text{BEC} = 0.095 \text{ ppb}$$

$$\text{LoD} = 0.0063 \text{ ppb}$$

133Cs (KED)

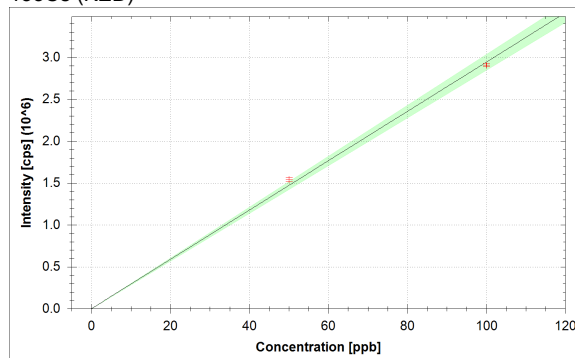

$$f(x) = 29423.0492 \cdot x + 382.2701$$

$$R^2 = 0.9985$$

$$\text{BEC} = 0.013 \text{ ppb}$$

$$\text{LoD} = 0.0047 \text{ ppb}$$

138Ba (KED)

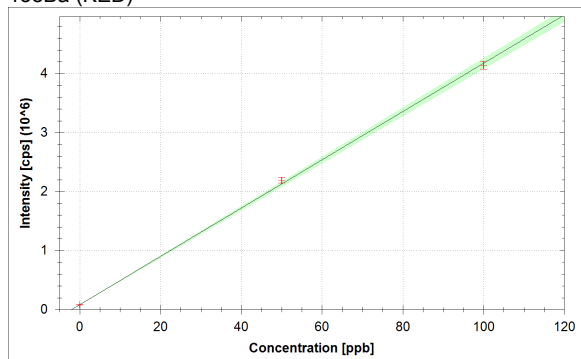

$$f(x) = 40906.6451 \cdot x + 82059.2268$$

$$R^2 = 0.9993$$

$$\text{BEC} = 2.006 \text{ ppb}$$

$$\text{LoD} = 0.1612 \text{ ppb}$$

139La (KED)

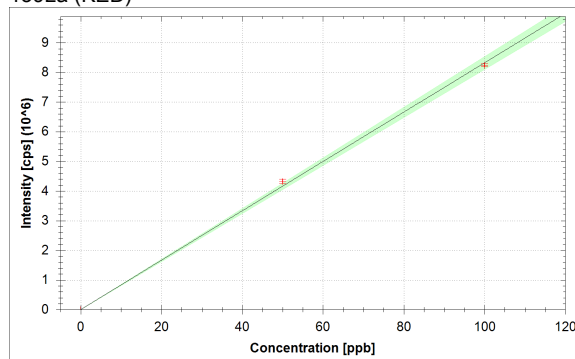

$$f(x) = 83243.4753 \cdot x + 1135.5377$$

$$R^2 = 0.9990$$

$$\text{BEC} = 0.014 \text{ ppb}$$

$$\text{LoD} = 0.0012 \text{ ppb}$$

140Ce (KED)

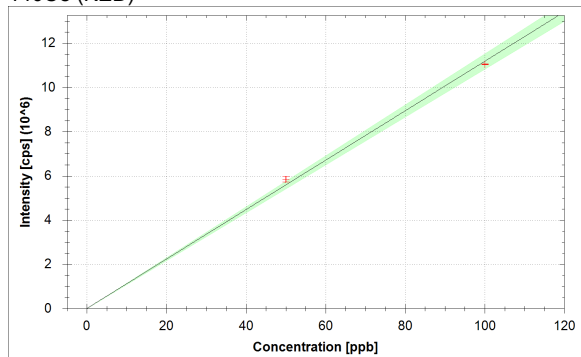

$$f(x) = 111743.5826 \cdot x + 3147.0717$$

$$R^2 = 0.9986$$

$$\text{BEC} = 0.028 \text{ ppb}$$

$$\text{LoD} = 0.0053 \text{ ppb}$$

141Pr (KED)

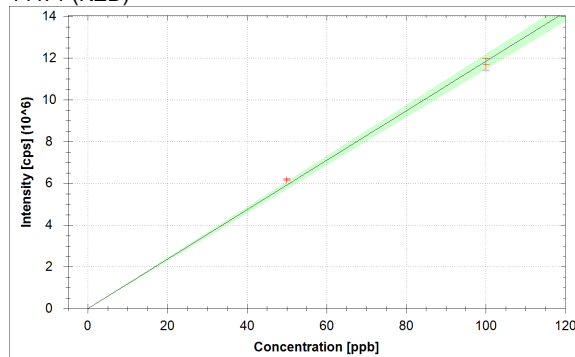

$$f(x) = 118372.1565 \cdot x + 504.1133$$

$$R^2 = 0.9987$$

$$\text{BEC} = 0.004 \text{ ppb}$$

$$\text{LoD} = 0.0015 \text{ ppb}$$

142Nd (KED)

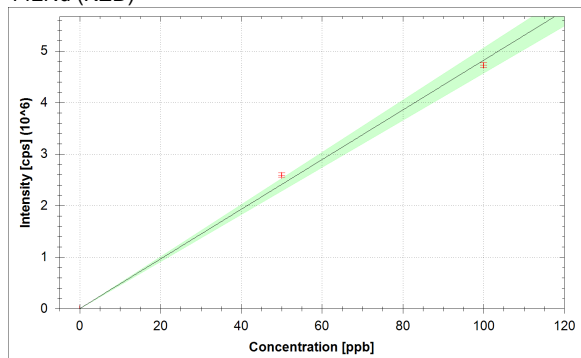

$$f(x) = 48169.3748 \cdot x + 948.9754$$

$$R^2 = 0.9962$$

$$\text{BEC} = 0.020 \text{ ppb}$$

$$\text{LoD} = 0.0022 \text{ ppb}$$

152Sm (KED)

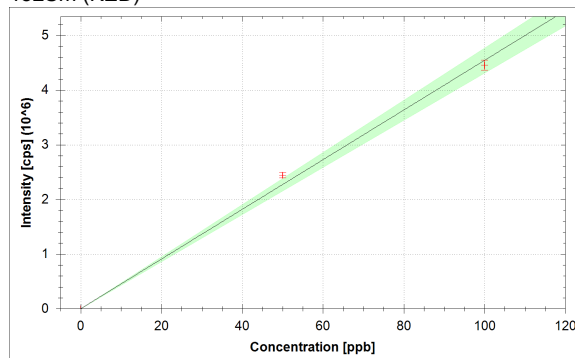

$$f(x) = 45428.9308 \cdot x + 153.2386$$

$$R^2 = 0.9963$$

$$\text{BEC} = 0.003 \text{ ppb}$$

$$\text{LoD} = 0.0011 \text{ ppb}$$

153Eu (KED)

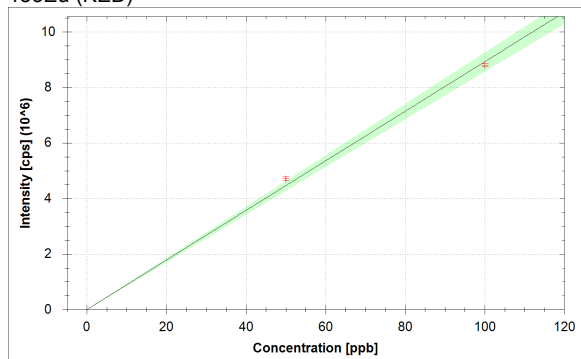

$$f(x) = 89221.1440 \cdot x + 91.1887$$

$$R^2 = 0.9980$$

$$\text{BEC} = 0.001 \text{ ppb}$$

$$\text{LoD} = 0.0005 \text{ ppb}$$

158Gd (KED)

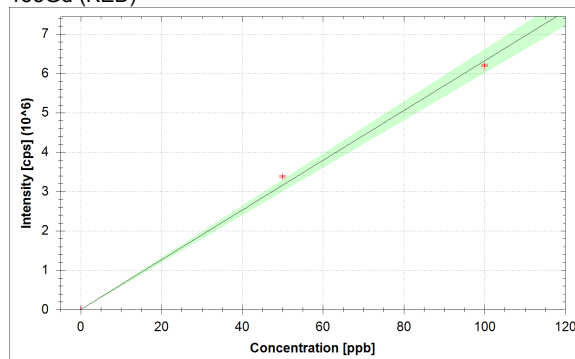

$$f(x) = 63162.8789 \cdot x + 137.8253$$

$$R^2 = 0.9968$$

$$\text{BEC} = 0.002 \text{ ppb}$$

$$\text{LoD} = 0.0004 \text{ ppb}$$

164Dy (KED)

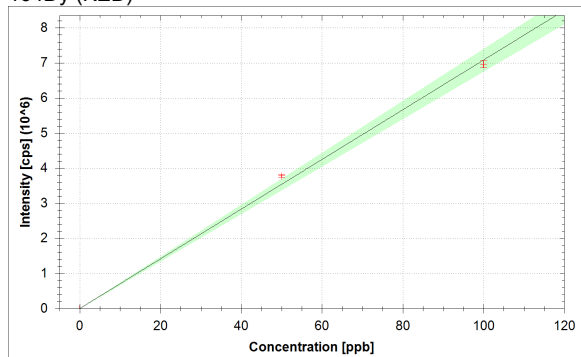

$$f(x) = 70809.0828 \cdot x + 136.7255$$

$$R^2 = 0.9971$$

$$\text{BEC} = 0.002 \text{ ppb}$$

$$\text{LoD} = 0.0004 \text{ ppb}$$

166Er (KED)

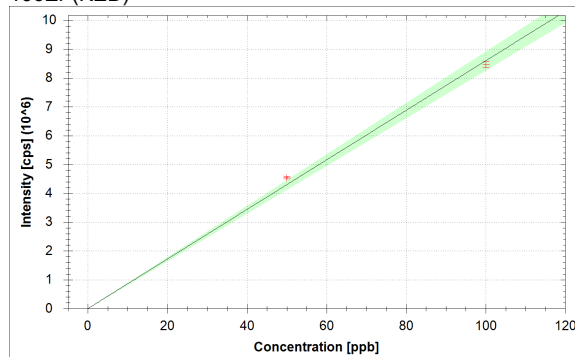

$$f(x) = 85963.2795 \cdot x + 612.3747$$

$$R^2 = 0.9980$$

$$\text{BEC} = 0.007 \text{ ppb}$$

$$\text{LoD} = 0.0010 \text{ ppb}$$

169Tm (KED)

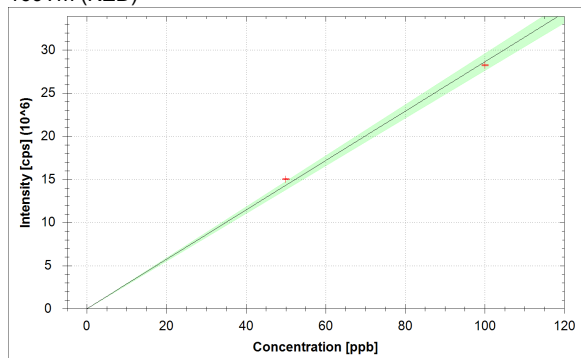

$$f(x) = 286195.4314 \cdot x + 68.7711$$

$$R^2 = 0.9983$$

$$\text{BEC} = 0.000 \text{ ppb}$$

$$\text{LoD} = 0.0002 \text{ ppb}$$

174Yb (KED)

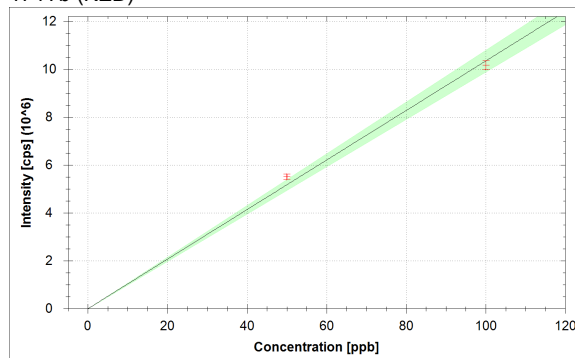

$$f(x) = 103491.8212 \cdot x + 146.7999$$

$$R^2 = 0.9972$$

$$\text{BEC} = 0.001 \text{ ppb}$$

$$\text{LoD} = 0.0007 \text{ ppb}$$

175Lu (KED)

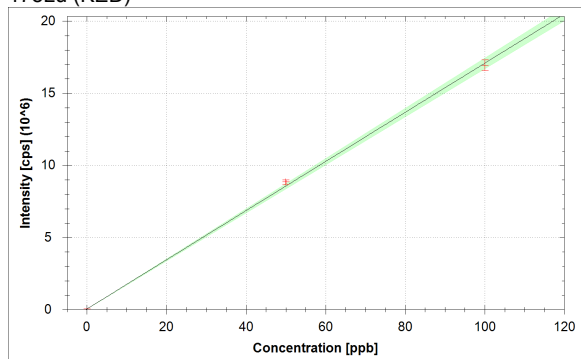

$$f(x) = 170404.3920 \cdot x + 41420.3193$$

$$R^2 = 0.9993$$

$$\text{BEC} = 0.243 \text{ ppb}$$

$$\text{LoD} = 0.0080 \text{ ppb}$$

205Tl (KED)

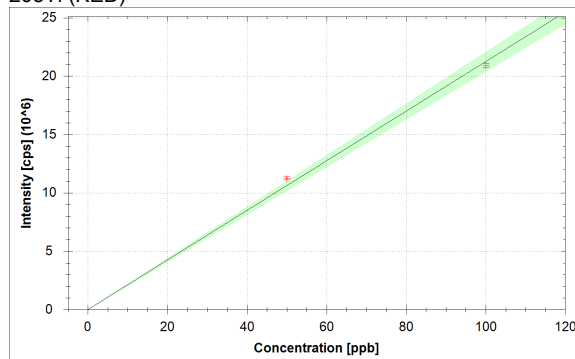

$$f(x) = 212399.9992 \cdot x + 157.6006$$

$$R^2 = 0.9978$$

$$\text{BEC} = 0.001 \text{ ppb}$$

$$\text{LoD} = 0.0004 \text{ ppb}$$

208Pb (KED)

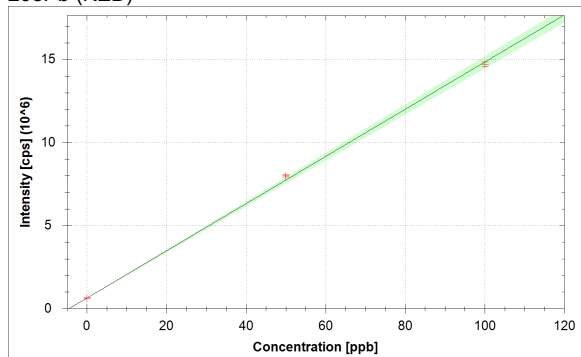

$$f(x) = 142087.0490 \cdot x + 630598.2910$$

$$R^2 = 0.9992$$

$$\text{BEC} = 4.438 \text{ ppb}$$

$$\text{LoD} = 0.0894 \text{ ppb}$$

232Th (KED)

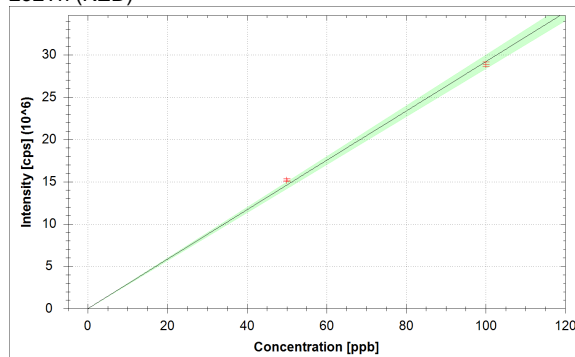

$$f(x) = 291851.8076 \cdot x + 1068.7444$$

$$R^2 = 0.9989$$

$$\text{BEC} = 0.004 \text{ ppb}$$

$$\text{LoD} = 0.0008 \text{ ppb}$$

<sup>238</sup>U (KED)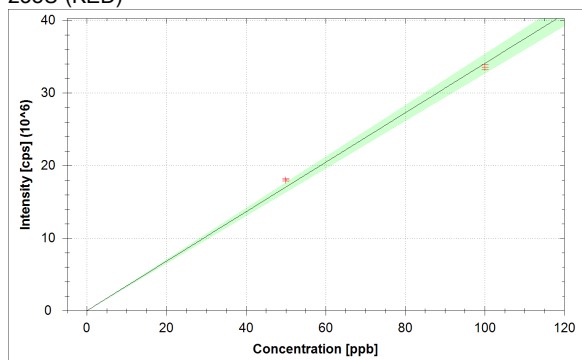

$$f(x) = 340678.9368 \cdot x + 2600.9069$$

$$R^2 = 0.9978$$

$$\text{BEC} = 0.008 \text{ ppb}$$

$$\text{LoD} = 0.0013 \text{ ppb}$$

**Standards:**

Analysis Index: 3  
 Analysis Name: 50+20  
 Analysis Type: STD  
 Analysis Started at: 9/3/2021 3:54:31 PM  
 Standard (Stock): std1  
 Standard DF: 1

| Category    | Concentration average | Concentration RSD | Standard Concentration |
|-------------|-----------------------|-------------------|------------------------|
| 6Li (KED)   | 107.974 %             |                   |                        |
| 9Be (KED)   | 50.749 ppb            | 5.3 %             | 50.000 ppb             |
| 11B (KED)   | 131.980 ppb           | 3.7 %             | 50.000 ppb             |
| 24Mg (KED)  | 49.139 ppb            | 6.9 %             | 50.000 ppb             |
| 27Al (KED)  | 48.475 ppb            | 4.4 %             | 50.000 ppb             |
| 45Sc (KED)  | 105.227 %             |                   |                        |
| 51V (KED)   | 51.807 ppb            | 2.2 %             | 50.000 ppb             |
| 52Cr (KED)  | 52.042 ppb            | 3.9 %             | 50.000 ppb             |
| 55Mn (KED)  | 51.755 ppb            | 3.2 %             | 50.000 ppb             |
| 56Fe (KED)  | 50.731 ppb            | 3.4 %             | 50.000 ppb             |
| 58Ni (KED)  | 51.860 ppb            | 1.7 %             | 50.000 ppb             |
| 59Co (KED)  | 52.486 ppb            | 2.1 %             | 50.000 ppb             |
| 63Cu (KED)  | 42.581 ppb            | 2.5 %             | 50.000 ppb             |
| 64Zn (KED)  | 37.126 ppb            | 3.8 %             | 50.000 ppb             |
| 69Ga (KED)  | 53.017 ppb            | 0.9 %             | 50.000 ppb             |
| 75As (KED)  | 52.701 ppb            | 2.1 %             | 50.000 ppb             |
| 80Se (KED)  | 53.262 ppb            | 3.0 %             | 50.000 ppb             |
| 85Rb (KED)  | 52.344 ppb            | 0.6 %             | 50.000 ppb             |
| 88Sr (KED)  | 52.930 ppb            | 0.6 %             | 50.000 ppb             |
| 89Y (KED)   | 103.806 %             |                   |                        |
| 107Ag (KED) | 53.962 ppb            | 0.7 %             | 50.000 ppb             |
| 114Cd (KED) | 52.469 ppb            | 0.6 %             | 50.000 ppb             |
| 115In (KED) | 103.457 %             |                   |                        |
| 133Cs (KED) | 52.411 ppb            | 1.4 %             | 50.000 ppb             |
| 138Ba (KED) | 51.605 ppb            | 2.4 %             | 50.000 ppb             |
| 139La (KED) | 51.974 ppb            | 1.6 %             | 50.000 ppb             |
| 140Ce (KED) | 52.338 ppb            | 2.3 %             | 50.000 ppb             |
| 141Pr (KED) | 52.222 ppb            | 0.9 %             | 50.000 ppb             |
| 142Nd (KED) | 53.819 ppb            | 1.5 %             | 50.000 ppb             |
| 152Sm (KED) | 53.794 ppb            | 2.0 %             | 50.000 ppb             |
| 153Eu (KED) | 52.810 ppb            | 1.5 %             | 50.000 ppb             |
| 158Gd (KED) | 53.498 ppb            | 1.0 %             | 50.000 ppb             |
| 159Tb (KED) | 102.701 %             |                   |                        |
| 164Dy (KED) | 53.356 ppb            | 0.9 %             | 50.000 ppb             |
| 166Er (KED) | 52.796 ppb            | 1.0 %             | 50.000 ppb             |
| 169Tm (KED) | 52.574 ppb            | 0.6 %             | 50.000 ppb             |
| 174Yb (KED) | 53.313 ppb            | 2.0 %             | 50.000 ppb             |
| 175Lu (KED) | 51.649 ppb            | 1.6 %             | 50.000 ppb             |
| 205Tl (KED) | 52.943 ppb            | 1.2 %             | 50.000 ppb             |
| 208Pb (KED) | 51.811 ppb            | 0.8 %             | 50.000 ppb             |
| 209Bi (KED) | 103.340 %             |                   |                        |
| 232Th (KED) | 52.078 ppb            | 1.3 %             | 50.000 ppb             |
| 238U (KED)  | 52.914 ppb            | 0.8 %             | 50.000 ppb             |

## Standards:

Analysis Index: 4  
 Analysis Name: 100+20  
 Analysis Type: STD  
 Analysis Started at: 9/3/2021 3:58:09 PM  
 Standard (Stock): std2  
 Standard DF: 1

| Category    | Concentration average | Concentration RSD | Standard Concentration |
|-------------|-----------------------|-------------------|------------------------|
| 6Li (KED)   | 108.327 %             |                   |                        |
| 9Be (KED)   | 99.626 ppb            | 7.0 %             | 100.000 ppb            |
| 11B (KED)   | 59.010 ppb            | 15.4 %            | 100.000 ppb            |
| 24Mg (KED)  | 100.431 ppb           | 4.6 %             | 100.000 ppb            |
| 27Al (KED)  | 100.763 ppb           | 1.1 %             | 100.000 ppb            |
| 45Sc (KED)  | 103.797 %             |                   |                        |
| 51V (KED)   | 99.097 ppb            | 1.0 %             | 100.000 ppb            |
| 52Cr (KED)  | 98.979 ppb            | 0.9 %             | 100.000 ppb            |
| 55Mn (KED)  | 99.123 ppb            | 0.7 %             | 100.000 ppb            |
| 56Fe (KED)  | 99.635 ppb            | 1.4 %             | 100.000 ppb            |
| 58Ni (KED)  | 99.070 ppb            | 1.0 %             | 100.000 ppb            |
| 59Co (KED)  | 98.757 ppb            | 0.9 %             | 100.000 ppb            |
| 63Cu (KED)  | 103.709 ppb           | 1.3 %             | 100.000 ppb            |
| 64Zn (KED)  | 106.437 ppb           | 2.8 %             | 100.000 ppb            |
| 69Ga (KED)  | 98.491 ppb            | 1.4 %             | 100.000 ppb            |
| 75As (KED)  | 98.650 ppb            | 0.8 %             | 100.000 ppb            |
| 80Se (KED)  | 98.369 ppb            | 2.6 %             | 100.000 ppb            |
| 85Rb (KED)  | 98.828 ppb            | 0.9 %             | 100.000 ppb            |
| 88Sr (KED)  | 98.535 ppb            | 1.5 %             | 100.000 ppb            |
| 89Y (KED)   | 103.920 %             |                   |                        |
| 107Ag (KED) | 98.019 ppb            | 0.9 %             | 100.000 ppb            |
| 114Cd (KED) | 98.766 ppb            | 0.8 %             | 100.000 ppb            |
| 115In (KED) | 102.866 %             |                   |                        |
| 133Cs (KED) | 98.795 ppb            | 0.7 %             | 100.000 ppb            |
| 138Ba (KED) | 99.198 ppb            | 1.6 %             | 100.000 ppb            |
| 139La (KED) | 99.013 ppb            | 0.5 %             | 100.000 ppb            |
| 140Ce (KED) | 98.831 ppb            | 0.1 %             | 100.000 ppb            |
| 141Pr (KED) | 98.889 ppb            | 2.3 %             | 100.000 ppb            |
| 142Nd (KED) | 98.091 ppb            | 1.0 %             | 100.000 ppb            |
| 152Sm (KED) | 98.103 ppb            | 2.1 %             | 100.000 ppb            |
| 153Eu (KED) | 98.595 ppb            | 0.6 %             | 100.000 ppb            |
| 158Gd (KED) | 98.251 ppb            | 0.5 %             | 100.000 ppb            |
| 159Tb (KED) | 101.752 %             |                   |                        |
| 164Dy (KED) | 98.322 ppb            | 1.4 %             | 100.000 ppb            |
| 166Er (KED) | 98.602 ppb            | 1.2 %             | 100.000 ppb            |
| 169Tm (KED) | 98.713 ppb            | 0.3 %             | 100.000 ppb            |
| 174Yb (KED) | 98.343 ppb            | 1.9 %             | 100.000 ppb            |
| 175Lu (KED) | 99.176 ppb            | 2.3 %             | 100.000 ppb            |
| 205Tl (KED) | 98.529 ppb            | 0.7 %             | 100.000 ppb            |
| 208Pb (KED) | 99.095 ppb            | 1.0 %             | 100.000 ppb            |
| 209Bi (KED) | 102.019 %             |                   |                        |
| 232Th (KED) | 98.961 ppb            | 1.0 %             | 100.000 ppb            |
| 238U (KED)  | 98.543 ppb            | 1.1 %             | 100.000 ppb            |

## Sample List Summary:

Instrument ID: iCAP Q

| Index: | Label:        | Main<br>Runs: | Survey<br>Runs: | Start Time:         | User name:                    |
|--------|---------------|---------------|-----------------|---------------------|-------------------------------|
| 1      | water         | 3             | 0               | 9/3/2021 3:47:44 PM | WINDOWS-UPCI4ER\Administrator |
| 2      | blk           | 3             | 0               | 9/3/2021 3:50:43 PM | WINDOWS-UPCI4ER\Administrator |
| 3      | 50+20         | 3             | 0               | 9/3/2021 3:54:31 PM | WINDOWS-UPCI4ER\Administrator |
| 4      | 100+20        | 3             | 0               | 9/3/2021 3:58:09 PM | WINDOWS-UPCI4ER\Administrator |
| 5      | 338jian       | 3             | 0               | 9/3/2021 4:02:05 PM | WINDOWS-UPCI4ER\Administrator |
| 6      | 322jian       | 3             | 0               | 9/3/2021 4:05:52 PM | WINDOWS-UPCI4ER\Administrator |
| 7      | 334jian       | 3             | 0               | 9/3/2021 4:09:47 PM | WINDOWS-UPCI4ER\Administrator |
| 8      | 340jian       | 3             | 0               | 9/3/2021 4:13:14 PM | WINDOWS-UPCI4ER\Administrator |
| 9      | 336jian       | 3             | 0               | 9/3/2021 4:16:41 PM | WINDOWS-UPCI4ER\Administrator |
| 10     | 332jian       | 3             | 0               | 9/3/2021 4:20:15 PM | WINDOWS-UPCI4ER\Administrator |
| 11     | 330jian       | 3             | 0               | 9/3/2021 4:23:34 PM | WINDOWS-UPCI4ER\Administrator |
| 12     | 326jian       | 3             | 0               | 9/3/2021 4:26:51 PM | WINDOWS-UPCI4ER\Administrator |
| 13     | 00026jian     | 3             | 0               | 9/3/2021 4:30:18 PM | WINDOWS-UPCI4ER\Administrator |
| 14     | 178607jian    | 3             | 0               | 9/3/2021 4:33:38 PM | WINDOWS-UPCI4ER\Administrator |
| 15     | 178578jian    | 3             | 0               | 9/3/2021 4:37:06 PM | WINDOWS-UPCI4ER\Administrator |
| 16     | 00029jian     | 3             | 0               | 9/3/2021 4:40:34 PM | WINDOWS-UPCI4ER\Administrator |
| 17     | 178588jian    | 3             | 0               | 9/3/2021 4:44:04 PM | WINDOWS-UPCI4ER\Administrator |
| 18     | 00025jian     | 3             | 0               | 9/3/2021 4:47:23 PM | WINDOWS-UPCI4ER\Administrator |
| 19     | 178606jian    | 3             | 0               | 9/3/2021 4:50:50 PM | WINDOWS-UPCI4ER\Administrator |
| 20     | 00027jian     | 3             | 0               | 9/3/2021 4:54:21 PM | WINDOWS-UPCI4ER\Administrator |
| 21     | 179338jian    | 3             | 0               | 9/3/2021 4:57:41 PM | WINDOWS-UPCI4ER\Administrator |
| 22     | 00028jian     | 3             | 0               | 9/3/2021 5:01:07 PM | WINDOWS-UPCI4ER\Administrator |
| 23     | 921144279jian | 3             | 0               | 9/3/2021 5:04:48 PM | WINDOWS-UPCI4ER\Administrator |
| 24     | 921057709jian | 3             | 0               | 9/3/2021 5:08:10 PM | WINDOWS-UPCI4ER\Administrator |

## Sample Summary

Instrument ID: iCAP Q

Analysis index: 1

Analysis name: water

Analysis started at: 9/3/2021 3:47:44 PM

User name: WINDOWS-UPCI4ER\Administrator

| Category    | Concentration average | Concentration RSD |
|-------------|-----------------------|-------------------|
| 6Li (KED)   | 0.000 %               |                   |
| 11B (KED)   | -Infinity ppb         |                   |
| 24Mg (KED)  | Infinity ppb          |                   |
| 27Al (KED)  | 42.975 ppb            | 126.0 %           |
| 45Sc (KED)  | 0.079 %               | 27.0 %            |
| 51V (KED)   | 0.884 ppb             | 69.6 %            |
| 52Cr (KED)  | 46.828 ppb            | 23.7 %            |
| 55Mn (KED)  | 38.440 ppb            | 25.0 %            |
| 56Fe (KED)  | 22.458 ppb            | 40.0 %            |
| 58Ni (KED)  | 278.147 ppb           | 27.1 %            |
| 59Co (KED)  | 6.116 ppb             | 26.6 %            |
| 63Cu (KED)  | Infinity ppb          |                   |
| 64Zn (KED)  | Infinity ppb          |                   |
| 69Ga (KED)  | Infinity ppb          |                   |
| 75As (KED)  | Infinity ppb          |                   |
| 80Se (KED)  | Infinity ppb          |                   |
| 85Rb (KED)  | Infinity ppb          |                   |
| 88Sr (KED)  | Infinity ppb          |                   |
| 89Y (KED)   | 0.000 %               |                   |
| 114Cd (KED) | Infinity ppb          |                   |
| 115In (KED) | 0.000 %               | 86.6 %            |
| 138Ba (KED) | Infinity ppb          |                   |
| 159Tb (KED) | 0.000 %               |                   |
| 205Tl (KED) | 45.697 ppb            | 13.0 %            |
| 208Pb (KED) | 77.339 ppb            | 16.0 %            |
| 209Bi (KED) | 0.000 %               | 32.7 %            |
| 232Th (KED) | -0.004 ppb            | 0.0 %             |
| 238U (KED)  | 3.554 ppb             | 118.7 %           |

| Category   | Concentration average | Intensity average | Intensity RSD |
|------------|-----------------------|-------------------|---------------|
| 6Li (KED)  | 0.000 %               | 0 cps             |               |
| 9Be (KED)  |                       | 0 cps             |               |
| 11B (KED)  | -Infinity ppb         | 122 cps           | 19.2 %        |
| 24Mg (KED) | Infinity ppb          | 581 cps           | 3.5 %         |
| 27Al (KED) | 42.975 ppb            | 6 cps             | 91.7 %        |
| 45Sc (KED) | 0.079 %               | 31 cps            | 27.0 %        |
| 51V (KED)  | 0.884 ppb             | 4 cps             | 43.3 %        |
| 52Cr (KED) | 46.828 ppb            | 387 cps           | 6.2 %         |
| 55Mn (KED) | 38.440 ppb            | 164 cps           | 20.4 %        |
| 56Fe (KED) | 22.458 ppb            | 211 cps           | 6.4 %         |
| 58Ni (KED) | 278.147 ppb           | 2,636 cps         | 0.8 %         |
| 59Co (KED) | 6.116 ppb             | 97 cps            | 0.0 %         |
| 63Cu (KED) | Infinity ppb          | 52 cps            | 38.5 %        |
| 64Zn (KED) | Infinity ppb          | 134 cps           | 10.3 %        |
| 69Ga (KED) | Infinity ppb          | 27 cps            | 57.3 %        |
| 75As (KED) | Infinity ppb          | 9 cps             | 57.3 %        |
| 80Se (KED) | Infinity ppb          | 983 cps           | 9.2 %         |
| 85Rb (KED) | Infinity ppb          | 27 cps            | 45.1 %        |
| 88Sr (KED) | Infinity ppb          | 226 cps           | 6.0 %         |
| 89Y (KED)  | 0.000 %               | 0 cps             |               |

| Category    | Concentration average | Intensity average | Intensity RSD |
|-------------|-----------------------|-------------------|---------------|
| 107Ag (KED) |                       | 1 cps             | 173.2 %       |
| 114Cd (KED) | Infinity ppb          | 1 cps             | 173.2 %       |
| 115In (KED) | 0.000 %               | 2 cps             | 86.6 %        |
| 133Cs (KED) |                       | 3 cps             | 100.0 %       |
| 138Ba (KED) | Infinity ppb          | 628 cps           | 10.4 %        |
| 139La (KED) |                       | 2 cps             | 86.6 %        |
| 140Ce (KED) |                       | 2 cps             | 173.2 %       |
| 141Pr (KED) |                       | 0 cps             |               |
| 142Nd (KED) |                       | 1 cps             | 173.2 %       |
| 152Sm (KED) |                       | 0 cps             |               |
| 153Eu (KED) |                       | 0 cps             |               |
| 158Gd (KED) |                       | 0 cps             |               |
| 159Tb (KED) | 0.000 %               | 0 cps             |               |
| 164Dy (KED) |                       | 0 cps             |               |
| 166Er (KED) |                       | 0 cps             |               |
| 169Tm (KED) |                       | 0 cps             |               |
| 174Yb (KED) |                       | 0 cps             |               |
| 175Lu (KED) |                       | 0 cps             |               |
| 205Tl (KED) | 45.697 ppb            | 36 cps            | 30.1 %        |
| 208Pb (KED) | 77.339 ppb            | 44 cps            | 45.2 %        |
| 209Bi (KED) | 0.000 %               | 16 cps            | 32.7 %        |
| 232Th (KED) | -0.004 ppb            | 0 cps             |               |
| 238U (KED)  | 3.554 ppb             | 3 cps             | 100.0 %       |

## Sample Summary

Instrument ID: iCAP Q

Analysis index: 2

Analysis name: blk

Analysis started at: 9/3/2021 3:50:43 PM

User name: WINDOWS-UPCI4ER\Administrator

| Category    | Concentration average | Concentration RSD |
|-------------|-----------------------|-------------------|
| 6Li (KED)   | 100.000 %             |                   |
| 9Be (KED)   | 0.000 ppb             |                   |
| 11B (KED)   | 0.000 ppb             | 0.1 %             |
| 24Mg (KED)  | 0.000 ppb             | 0.1 %             |
| 27Al (KED)  | 0.000 ppb             | 0.1 %             |
| 45Sc (KED)  | 100.000 %             |                   |
| 51V (KED)   | 0.000 ppb             | 0.2 %             |
| 52Cr (KED)  | 0.000 ppb             | 0.0 %             |
| 55Mn (KED)  | 0.000 ppb             | 0.1 %             |
| 56Fe (KED)  | 0.000 ppb             | 0.0 %             |
| 58Ni (KED)  | 0.000 ppb             | 0.0 %             |
| 59Co (KED)  | 0.000 ppb             | 0.2 %             |
| 63Cu (KED)  | 0.000 ppb             | 0.0 %             |
| 64Zn (KED)  | 0.000 ppb             | 0.0 %             |
| 69Ga (KED)  | 0.000 ppb             | 0.0 %             |
| 75As (KED)  | 0.000 ppb             | 0.3 %             |
| 80Se (KED)  | 0.000 ppb             | 0.1 %             |
| 85Rb (KED)  | 0.000 ppb             | 0.0 %             |
| 88Sr (KED)  | 0.000 ppb             | 0.0 %             |
| 89Y (KED)   | 100.000 %             |                   |
| 107Ag (KED) | 0.000 ppb             | 0.2 %             |
| 114Cd (KED) | 0.000 ppb             | 0.0 %             |
| 115In (KED) | 100.000 %             |                   |
| 133Cs (KED) | 0.000 ppb             | 0.1 %             |
| 138Ba (KED) | 0.000 ppb             | 0.0 %             |
| 139La (KED) | 0.000 ppb             | 0.0 %             |
| 140Ce (KED) | 0.000 ppb             | 0.1 %             |
| 141Pr (KED) | 0.000 ppb             | 0.1 %             |
| 142Nd (KED) | 0.000 ppb             | 0.0 %             |
| 152Sm (KED) | 0.000 ppb             | 0.1 %             |
| 153Eu (KED) | 0.000 ppb             | 0.2 %             |
| 158Gd (KED) | 0.000 ppb             | 0.1 %             |
| 159Tb (KED) | 100.000 %             |                   |
| 164Dy (KED) | 0.000 ppb             | 0.1 %             |
| 166Er (KED) | 0.000 ppb             | 0.0 %             |
| 169Tm (KED) | 0.000 ppb             | 0.3 %             |
| 174Yb (KED) | 0.000 ppb             | 0.2 %             |
| 175Lu (KED) | 0.000 ppb             | 0.0 %             |
| 205Tl (KED) | 0.000 ppb             | 0.2 %             |
| 208Pb (KED) | 0.000 ppb             | 0.0 %             |
| 209Bi (KED) | 100.000 %             |                   |
| 232Th (KED) | 0.000 ppb             | 0.1 %             |
| 238U (KED)  | 0.000 ppb             | 0.1 %             |

| Category   | Concentration average | Intensity average | Intensity RSD |
|------------|-----------------------|-------------------|---------------|
| 6Li (KED)  | 100.000 %             | 2,522 cps         | 5.3 %         |
| 9Be (KED)  | 0.000 ppb             | 0 cps             |               |
| 11B (KED)  | 0.000 ppb             | 8,880 cps         | 2.3 %         |
| 24Mg (KED) | 0.000 ppb             | 4,599 cps         | 1.4 %         |
| 27Al (KED) | 0.000 ppb             | 1,917 cps         | 6.5 %         |

| Category    | Concentration average | Intensity average | Intensity RSD |
|-------------|-----------------------|-------------------|---------------|
| 45Sc (KED)  | 100.000 %             | 39,371 cps        | 1.0 %         |
| 51V (KED)   | 0.000 ppb             | 96 cps            | 23.2 %        |
| 52Cr (KED)  | 0.000 ppb             | 3,557 cps         | 3.3 %         |
| 55Mn (KED)  | 0.000 ppb             | 2,361 cps         | 4.6 %         |
| 56Fe (KED)  | 0.000 ppb             | 72,877 cps        | 2.9 %         |
| 58Ni (KED)  | 0.000 ppb             | 17,908 cps        | 1.1 %         |
| 59Co (KED)  | 0.000 ppb             | 341 cps           | 14.7 %        |
| 63Cu (KED)  | 0.000 ppb             | 347,001 cps       | 2.7 %         |
| 64Zn (KED)  | 0.000 ppb             | 121,361 cps       | 0.4 %         |
| 69Ga (KED)  | 0.000 ppb             | 2,949 cps         | 1.0 %         |
| 75As (KED)  | 0.000 ppb             | 123 cps           | 25.8 %        |
| 80Se (KED)  | 0.000 ppb             | 1,056 cps         | 4.0 %         |
| 85Rb (KED)  | 0.000 ppb             | 1,261 cps         | 2.6 %         |
| 88Sr (KED)  | 0.000 ppb             | 2,301 cps         | 2.5 %         |
| 89Y (KED)   | 100.000 %             | 387,495 cps       | 2.3 %         |
| 107Ag (KED) | 0.000 ppb             | 173 cps           | 18.9 %        |
| 114Cd (KED) | 0.000 ppb             | 1,777 cps         | 2.9 %         |
| 115In (KED) | 100.000 %             | 779,774 cps       | 0.7 %         |
| 133Cs (KED) | 0.000 ppb             | 382 cps           | 11.8 %        |
| 138Ba (KED) | 0.000 ppb             | 82,052 cps        | 2.3 %         |
| 139La (KED) | 0.000 ppb             | 1,136 cps         | 3.3 %         |
| 140Ce (KED) | 0.000 ppb             | 3,146 cps         | 5.5 %         |
| 141Pr (KED) | 0.000 ppb             | 504 cps           | 12.4 %        |
| 142Nd (KED) | 0.000 ppb             | 949 cps           | 3.5 %         |
| 152Sm (KED) | 0.000 ppb             | 153 cps           | 11.5 %        |
| 153Eu (KED) | 0.000 ppb             | 91 cps            | 14.8 %        |
| 158Gd (KED) | 0.000 ppb             | 138 cps           | 5.0 %         |
| 159Tb (KED) | 100.000 %             | 4,330,050 cps     | 0.9 %         |
| 164Dy (KED) | 0.000 ppb             | 137 cps           | 6.5 %         |
| 166Er (KED) | 0.000 ppb             | 612 cps           | 4.0 %         |
| 169Tm (KED) | 0.000 ppb             | 69 cps            | 34.0 %        |
| 174Yb (KED) | 0.000 ppb             | 147 cps           | 15.9 %        |
| 175Lu (KED) | 0.000 ppb             | 41,418 cps        | 0.4 %         |
| 205Tl (KED) | 0.000 ppb             | 158 cps           | 20.5 %        |
| 208Pb (KED) | 0.000 ppb             | 630,619 cps       | 1.9 %         |
| 209Bi (KED) | 100.000 %             | 4,199,819 cps     | 1.5 %         |
| 232Th (KED) | 0.000 ppb             | 1,069 cps         | 7.7 %         |
| 238U (KED)  | 0.000 ppb             | 2,600 cps         | 4.9 %         |

## Sample Summary

Instrument ID: iCAP Q

Analysis index: 3

Analysis name: 50+20

Analysis started at: 9/3/2021 3:54:31 PM

User name: WINDOWS-UPCI4ER\Administrator

| Category    | Concentration average | Concentration RSD |
|-------------|-----------------------|-------------------|
| 6Li (KED)   | 107.974 %             |                   |
| 9Be (KED)   | 50.749 ppb            | 5.3 %             |
| 11B (KED)   | 131.980 ppb           | 3.7 %             |
| 24Mg (KED)  | 49.139 ppb            | 6.9 %             |
| 27Al (KED)  | 48.475 ppb            | 4.4 %             |
| 45Sc (KED)  | 105.227 %             |                   |
| 51V (KED)   | 51.807 ppb            | 2.2 %             |
| 52Cr (KED)  | 52.042 ppb            | 3.9 %             |
| 55Mn (KED)  | 51.755 ppb            | 3.2 %             |
| 56Fe (KED)  | 50.731 ppb            | 3.4 %             |
| 58Ni (KED)  | 51.860 ppb            | 1.7 %             |
| 59Co (KED)  | 52.486 ppb            | 2.1 %             |
| 63Cu (KED)  | 42.581 ppb            | 2.5 %             |
| 64Zn (KED)  | 37.126 ppb            | 3.8 %             |
| 69Ga (KED)  | 53.017 ppb            | 0.9 %             |
| 75As (KED)  | 52.701 ppb            | 2.1 %             |
| 80Se (KED)  | 53.262 ppb            | 3.0 %             |
| 85Rb (KED)  | 52.344 ppb            | 0.6 %             |
| 88Sr (KED)  | 52.930 ppb            | 0.6 %             |
| 89Y (KED)   | 103.806 %             |                   |
| 107Ag (KED) | 53.962 ppb            | 0.7 %             |
| 114Cd (KED) | 52.469 ppb            | 0.6 %             |
| 115In (KED) | 103.457 %             |                   |
| 133Cs (KED) | 52.411 ppb            | 1.4 %             |
| 138Ba (KED) | 51.605 ppb            | 2.4 %             |
| 139La (KED) | 51.974 ppb            | 1.6 %             |
| 140Ce (KED) | 52.338 ppb            | 2.3 %             |
| 141Pr (KED) | 52.222 ppb            | 0.9 %             |
| 142Nd (KED) | 53.819 ppb            | 1.5 %             |
| 152Sm (KED) | 53.794 ppb            | 2.0 %             |
| 153Eu (KED) | 52.810 ppb            | 1.5 %             |
| 158Gd (KED) | 53.498 ppb            | 1.0 %             |
| 159Tb (KED) | 102.701 %             |                   |
| 164Dy (KED) | 53.356 ppb            | 0.9 %             |
| 166Er (KED) | 52.796 ppb            | 1.0 %             |
| 169Tm (KED) | 52.574 ppb            | 0.6 %             |
| 174Yb (KED) | 53.313 ppb            | 2.0 %             |
| 175Lu (KED) | 51.649 ppb            | 1.6 %             |
| 205Tl (KED) | 52.943 ppb            | 1.2 %             |
| 208Pb (KED) | 51.811 ppb            | 0.8 %             |
| 209Bi (KED) | 103.340 %             |                   |
| 232Th (KED) | 52.078 ppb            | 1.3 %             |
| 238U (KED)  | 52.914 ppb            | 0.8 %             |

| Category   | Concentration average | Intensity average | Intensity RSD |
|------------|-----------------------|-------------------|---------------|
| 6Li (KED)  | 107.974 %             | 2,724 cps         | 4.2 %         |
| 9Be (KED)  | 50.749 ppb            | 6,461 cps         | 2.6 %         |
| 11B (KED)  | 131.980 ppb           | 4,273 cps         | 1.4 %         |
| 24Mg (KED) | 49.139 ppb            | 25,835 cps        | 1.8 %         |
| 27Al (KED) | 48.475 ppb            | 7,095 cps         | 1.8 %         |

| Category    | Concentration average | Intensity average | Intensity RSD |
|-------------|-----------------------|-------------------|---------------|
| 45Sc (KED)  | 105.227 %             | 41,429 cps        | 1.8 %         |
| 51V (KED)   | 51.807 ppb            | 382,507 cps       | 0.5 %         |
| 52Cr (KED)  | 52.042 ppb            | 595,414 cps       | 2.1 %         |
| 55Mn (KED)  | 51.755 ppb            | 303,594 cps       | 1.4 %         |
| 56Fe (KED)  | 50.731 ppb            | 574,076 cps       | 1.2 %         |
| 58Ni (KED)  | 51.860 ppb            | 702,421 cps       | 0.2 %         |
| 59Co (KED)  | 52.486 ppb            | 1,156,417 cps     | 1.7 %         |
| 63Cu (KED)  | 42.581 ppb            | 868,355 cps       | 1.3 %         |
| 64Zn (KED)  | 37.126 ppb            | 231,649 cps       | 1.4 %         |
| 69Ga (KED)  | 53.017 ppb            | 300,220 cps       | 0.7 %         |
| 75As (KED)  | 52.701 ppb            | 66,471 cps        | 1.8 %         |
| 80Se (KED)  | 53.262 ppb            | 21,489 cps        | 2.7 %         |
| 85Rb (KED)  | 52.344 ppb            | 288,481 cps       | 0.3 %         |
| 88Sr (KED)  | 52.930 ppb            | 411,776 cps       | 0.9 %         |
| 89Y (KED)   | 103.806 %             | 402,244 cps       | 0.3 %         |
| 107Ag (KED) | 53.962 ppb            | 2,761,974 cps     | 1.1 %         |
| 114Cd (KED) | 52.469 ppb            | 1,018,342 cps     | 0.7 %         |
| 115In (KED) | 103.457 %             | 806,727 cps       | 0.5 %         |
| 133Cs (KED) | 52.411 ppb            | 1,595,744 cps     | 1.3 %         |
| 138Ba (KED) | 51.605 ppb            | 2,251,800 cps     | 1.1 %         |
| 139La (KED) | 51.974 ppb            | 4,443,833 cps     | 0.2 %         |
| 140Ce (KED) | 52.338 ppb            | 6,008,333 cps     | 0.9 %         |
| 141Pr (KED) | 52.222 ppb            | 6,348,621 cps     | 0.6 %         |
| 142Nd (KED) | 53.819 ppb            | 2,663,110 cps     | 0.9 %         |
| 152Sm (KED) | 53.794 ppb            | 2,509,487 cps     | 0.7 %         |
| 153Eu (KED) | 52.810 ppb            | 4,838,687 cps     | 1.2 %         |
| 158Gd (KED) | 53.498 ppb            | 3,470,308 cps     | 1.2 %         |
| 159Tb (KED) | 102.701 %             | 4,446,992 cps     | 1.4 %         |
| 164Dy (KED) | 53.356 ppb            | 3,880,166 cps     | 1.5 %         |
| 166Er (KED) | 52.796 ppb            | 4,661,580 cps     | 1.4 %         |
| 169Tm (KED) | 52.574 ppb            | 15,452,260 cps    | 1.0 %         |
| 174Yb (KED) | 53.313 ppb            | 5,665,648 cps     | 0.8 %         |
| 175Lu (KED) | 51.649 ppb            | 9,080,233 cps     | 0.6 %         |
| 205Tl (KED) | 52.943 ppb            | 11,621,616 cps    | 2.1 %         |
| 208Pb (KED) | 51.811 ppb            | 8,259,424 cps     | 1.6 %         |
| 209Bi (KED) | 103.340 %             | 4,340,097 cps     | 0.9 %         |
| 232Th (KED) | 52.078 ppb            | 15,706,859 cps    | 0.5 %         |
| 238U (KED)  | 52.914 ppb            | 18,631,134 cps    | 0.9 %         |

## Sample Summary

Instrument ID: iCAP Q

Analysis index: 4

Analysis name: 100+20

Analysis started at: 9/3/2021 3:58:09 PM

User name: WINDOWS-UPCI4ER\Administrator

| Category    | Concentration average | Concentration RSD |
|-------------|-----------------------|-------------------|
| 6Li (KED)   | 108.327 %             |                   |
| 9Be (KED)   | 99.626 ppb            | 7.0 %             |
| 11B (KED)   | 59.010 ppb            | 15.4 %            |
| 24Mg (KED)  | 100.431 ppb           | 4.6 %             |
| 27Al (KED)  | 100.763 ppb           | 1.1 %             |
| 45Sc (KED)  | 103.797 %             |                   |
| 51V (KED)   | 99.097 ppb            | 1.0 %             |
| 52Cr (KED)  | 98.979 ppb            | 0.9 %             |
| 55Mn (KED)  | 99.123 ppb            | 0.7 %             |
| 56Fe (KED)  | 99.635 ppb            | 1.4 %             |
| 58Ni (KED)  | 99.070 ppb            | 1.0 %             |
| 59Co (KED)  | 98.757 ppb            | 0.9 %             |
| 63Cu (KED)  | 103.709 ppb           | 1.3 %             |
| 64Zn (KED)  | 106.437 ppb           | 2.8 %             |
| 69Ga (KED)  | 98.491 ppb            | 1.4 %             |
| 75As (KED)  | 98.650 ppb            | 0.8 %             |
| 80Se (KED)  | 98.369 ppb            | 2.6 %             |
| 85Rb (KED)  | 98.828 ppb            | 0.9 %             |
| 88Sr (KED)  | 98.535 ppb            | 1.5 %             |
| 89Y (KED)   | 103.920 %             |                   |
| 107Ag (KED) | 98.019 ppb            | 0.9 %             |
| 114Cd (KED) | 98.766 ppb            | 0.8 %             |
| 115In (KED) | 102.866 %             |                   |
| 133Cs (KED) | 98.795 ppb            | 0.7 %             |
| 138Ba (KED) | 99.198 ppb            | 1.6 %             |
| 139La (KED) | 99.013 ppb            | 0.5 %             |
| 140Ce (KED) | 98.831 ppb            | 0.1 %             |
| 141Pr (KED) | 98.889 ppb            | 2.3 %             |
| 142Nd (KED) | 98.091 ppb            | 1.0 %             |
| 152Sm (KED) | 98.103 ppb            | 2.1 %             |
| 153Eu (KED) | 98.595 ppb            | 0.6 %             |
| 158Gd (KED) | 98.251 ppb            | 0.5 %             |
| 159Tb (KED) | 101.752 %             |                   |
| 164Dy (KED) | 98.322 ppb            | 1.4 %             |
| 166Er (KED) | 98.602 ppb            | 1.2 %             |
| 169Tm (KED) | 98.713 ppb            | 0.3 %             |
| 174Yb (KED) | 98.343 ppb            | 1.9 %             |
| 175Lu (KED) | 99.176 ppb            | 2.3 %             |
| 205Tl (KED) | 98.529 ppb            | 0.7 %             |
| 208Pb (KED) | 99.095 ppb            | 1.0 %             |
| 209Bi (KED) | 102.019 %             |                   |
| 232Th (KED) | 98.961 ppb            | 1.0 %             |
| 238U (KED)  | 98.543 ppb            | 1.1 %             |

| Category   | Concentration average | Intensity average | Intensity RSD |
|------------|-----------------------|-------------------|---------------|
| 6Li (KED)  | 108.327 %             | 2,733 cps         | 4.1 %         |
| 9Be (KED)  | 99.626 ppb            | 12,716 cps        | 2.7 %         |
| 11B (KED)  | 59.010 ppb            | 7,238 cps         | 0.8 %         |
| 24Mg (KED) | 100.431 ppb           | 47,786 cps        | 0.1 %         |
| 27Al (KED) | 100.763 ppb           | 12,407 cps        | 0.8 %         |

| Category    | Concentration average | Intensity average | Intensity RSD |
|-------------|-----------------------|-------------------|---------------|
| 45Sc (KED)  | 103.797 %             | 40,866 cps        | 0.3 %         |
| 51V (KED)   | 99.097 ppb            | 721,813 cps       | 0.8 %         |
| 52Cr (KED)  | 98.979 ppb            | 1,114,220 cps     | 0.6 %         |
| 55Mn (KED)  | 99.123 ppb            | 571,522 cps       | 0.5 %         |
| 56Fe (KED)  | 99.635 ppb            | 1,039,622 cps     | 1.3 %         |
| 58Ni (KED)  | 99.070 ppb            | 1,306,988 cps     | 1.0 %         |
| 59Co (KED)  | 98.757 ppb            | 2,146,360 cps     | 1.0 %         |
| 63Cu (KED)  | 103.709 ppb           | 1,599,402 cps     | 0.4 %         |
| 64Zn (KED)  | 106.437 ppb           | 429,288 cps       | 1.2 %         |
| 69Ga (KED)  | 98.491 ppb            | 555,674 cps       | 0.7 %         |
| 75As (KED)  | 98.650 ppb            | 124,449 cps       | 0.2 %         |
| 80Se (KED)  | 98.369 ppb            | 38,798 cps        | 2.0 %         |
| 85Rb (KED)  | 98.828 ppb            | 544,087 cps       | 0.4 %         |
| 88Sr (KED)  | 98.535 ppb            | 765,278 cps       | 0.8 %         |
| 89Y (KED)   | 103.920 %             | 402,685 cps       | 0.8 %         |
| 107Ag (KED) | 98.019 ppb            | 4,988,118 cps     | 0.9 %         |
| 114Cd (KED) | 98.766 ppb            | 1,904,335 cps     | 0.9 %         |
| 115In (KED) | 102.866 %             | 802,120 cps       | 0.0 %         |
| 133Cs (KED) | 98.795 ppb            | 2,990,534 cps     | 0.7 %         |
| 138Ba (KED) | 99.198 ppb            | 4,212,117 cps     | 0.8 %         |
| 139La (KED) | 99.013 ppb            | 8,387,989 cps     | 1.2 %         |
| 140Ce (KED) | 98.831 ppb            | 11,240,490 cps    | 0.8 %         |
| 141Pr (KED) | 98.889 ppb            | 11,910,039 cps    | 1.7 %         |
| 142Nd (KED) | 98.091 ppb            | 4,808,500 cps     | 0.3 %         |
| 152Sm (KED) | 98.103 ppb            | 4,534,517 cps     | 1.3 %         |
| 153Eu (KED) | 98.595 ppb            | 8,950,730 cps     | 0.1 %         |
| 158Gd (KED) | 98.251 ppb            | 6,314,815 cps     | 1.2 %         |
| 159Tb (KED) | 101.752 %             | 4,405,924 cps     | 0.7 %         |
| 164Dy (KED) | 98.322 ppb            | 7,083,745 cps     | 0.7 %         |
| 166Er (KED) | 98.602 ppb            | 8,624,925 cps     | 0.9 %         |
| 169Tm (KED) | 98.713 ppb            | 28,746,770 cps    | 1.0 %         |
| 174Yb (KED) | 98.343 ppb            | 10,355,914 cps    | 1.8 %         |
| 175Lu (KED) | 99.176 ppb            | 17,236,353 cps    | 1.5 %         |
| 205Tl (KED) | 98.529 ppb            | 21,349,226 cps    | 0.3 %         |
| 208Pb (KED) | 99.095 ppb            | 15,006,870 cps    | 0.3 %         |
| 209Bi (KED) | 102.019 %             | 4,284,634 cps     | 1.0 %         |
| 232Th (KED) | 98.961 ppb            | 29,464,841 cps    | 0.7 %         |
| 238U (KED)  | 98.543 ppb            | 34,252,203 cps    | 1.5 %         |

## Sample Summary

Instrument ID: iCAP Q

Analysis index: 5

Analysis name: 338jian

Analysis started at: 9/3/2021 4:02:05 PM

User name: WINDOWS-UPCI4ER\Administrator

| Category    | Concentration average | Concentration RSD |
|-------------|-----------------------|-------------------|
| 6Li (KED)   | 122.029 %             | 1.0 %             |
| 9Be (KED)   | 0.031 ppb             | 113.9 %           |
| 11B (KED)   | 230.977 ppb           | 0.4 %             |
| 24Mg (KED)  | 223.864 ppb           | 1.2 %             |
| 27Al (KED)  | 230.319 ppb           | 1.6 %             |
| 45Sc (KED)  | 112.782 %             | 2.1 %             |
| 51V (KED)   | 0.491 ppb             | 25.8 %            |
| 52Cr (KED)  | 2.916 ppb             | 12.9 %            |
| 55Mn (KED)  | 5.590 ppb             | 6.9 %             |
| 56Fe (KED)  | 250.740 ppb           | 0.7 %             |
| 58Ni (KED)  | 0.734 ppb             | 35.6 %            |
| 59Co (KED)  | 0.337 ppb             | 74.2 %            |
| 63Cu (KED)  | -20.353 ppb           | 0.5 %             |
| 64Zn (KED)  | 236.229 ppb           | 0.3 %             |
| 69Ga (KED)  | 0.237 ppb             | 80.2 %            |
| 75As (KED)  | 0.180 ppb             | 69.0 %            |
| 80Se (KED)  | 0.200 ppb             | 110.0 %           |
| 85Rb (KED)  | 1.358 ppb             | 9.1 %             |
| 88Sr (KED)  | 3.620 ppb             | 4.6 %             |
| 89Y (KED)   | 105.703 %             | 1.4 %             |
| 107Ag (KED) | 0.132 ppb             | 49.9 %            |
| 114Cd (KED) | 0.010 ppb             | 485.1 %           |
| 115In (KED) | 100.219 %             | 0.7 %             |
| 133Cs (KED) | 0.074 ppb             | 59.8 %            |
| 138Ba (KED) | 0.989 ppb             | 7.1 %             |
| 139La (KED) | 0.214 ppb             | 15.9 %            |
| 140Ce (KED) | 0.413 ppb             | 4.7 %             |
| 141Pr (KED) | 0.062 ppb             | 38.1 %            |
| 142Nd (KED) | 0.261 ppb             | 6.8 %             |
| 152Sm (KED) | 0.053 ppb             | 33.4 %            |
| 153Eu (KED) | 0.020 ppb             | 87.3 %            |
| 158Gd (KED) | 0.042 ppb             | 34.5 %            |
| 159Tb (KED) | 103.990 %             | 2.3 %             |
| 164Dy (KED) | 0.032 ppb             | 42.6 %            |
| 166Er (KED) | 0.019 ppb             | 54.8 %            |
| 169Tm (KED) | 0.010 ppb             | 89.0 %            |
| 174Yb (KED) | 0.016 ppb             | 43.1 %            |
| 175Lu (KED) | -0.044 ppb            | 4.8 %             |
| 205Tl (KED) | 0.017 ppb             | 44.4 %            |
| 208Pb (KED) | -3.754 ppb            | 0.6 %             |
| 209Bi (KED) | 90.625 %              | 1.2 %             |
| 232Th (KED) | 0.167 ppb             | 23.3 %            |
| 238U (KED)  | 0.034 ppb             | 26.7 %            |

| Category   | Concentration average | Intensity average | Intensity RSD |
|------------|-----------------------|-------------------|---------------|
| 6Li (KED)  | 122.029 %             | 3,078 cps         | 1.0 %         |
| 9Be (KED)  | 0.031 ppb             | 4 cps             | 114.6 %       |
| 11B (KED)  | 230.977 ppb           | 318 cps           | 13.7 %        |
| 24Mg (KED) | 223.864 ppb           | 113,217 cps       | 1.9 %         |
| 27Al (KED) | 230.319 ppb           | 28,034 cps        | 2.0 %         |

| Category    | Concentration average | Intensity average | Intensity RSD |
|-------------|-----------------------|-------------------|---------------|
| 45Sc (KED)  | 112.782 %             | 44,403 cps        | 2.1 %         |
| 51V (KED)   | 0.491 ppb             | 3,983 cps         | 22.9 %        |
| 52Cr (KED)  | 2.916 ppb             | 39,492 cps        | 9.4 %         |
| 55Mn (KED)  | 5.590 ppb             | 37,498 cps        | 4.3 %         |
| 56Fe (KED)  | 250.740 ppb           | 2,718,167 cps     | 2.3 %         |
| 58Ni (KED)  | 0.734 ppb             | 30,524 cps        | 9.9 %         |
| 59Co (KED)  | 0.337 ppb             | 8,267 cps         | 68.6 %        |
| 63Cu (KED)  | -20.353 ppb           | 119,591 cps       | 0.9 %         |
| 64Zn (KED)  | 236.229 ppb           | 812,745 cps       | 1.6 %         |
| 69Ga (KED)  | 0.237 ppb             | 4,463 cps         | 22.9 %        |
| 75As (KED)  | 0.180 ppb             | 360 cps           | 42.7 %        |
| 80Se (KED)  | 0.200 ppb             | 1,195 cps         | 7.1 %         |
| 85Rb (KED)  | 1.358 ppb             | 8,912 cps         | 6.6 %         |
| 88Sr (KED)  | 3.620 ppb             | 30,931 cps        | 3.0 %         |
| 89Y (KED)   | 105.703 %             | 409,593 cps       | 1.4 %         |
| 107Ag (KED) | 0.132 ppb             | 6,720 cps         | 48.4 %        |
| 114Cd (KED) | 0.010 ppb             | 1,968 cps         | 46.3 %        |
| 115In (KED) | 100.219 %             | 781,480 cps       | 0.7 %         |
| 133Cs (KED) | 0.074 ppb             | 2,556 cps         | 50.6 %        |
| 138Ba (KED) | 0.989 ppb             | 127,380 cps       | 1.0 %         |
| 139La (KED) | 0.214 ppb             | 19,751 cps        | 16.5 %        |
| 140Ce (KED) | 0.413 ppb             | 51,321 cps        | 6.1 %         |
| 141Pr (KED) | 0.062 ppb             | 8,244 cps         | 37.3 %        |
| 142Nd (KED) | 0.261 ppb             | 14,075 cps        | 7.3 %         |
| 152Sm (KED) | 0.053 ppb             | 2,676 cps         | 33.2 %        |
| 153Eu (KED) | 0.020 ppb             | 1,962 cps         | 84.6 %        |
| 158Gd (KED) | 0.042 ppb             | 2,901 cps         | 34.6 %        |
| 159Tb (KED) | 103.990 %             | 4,502,835 cps     | 2.3 %         |
| 164Dy (KED) | 0.032 ppb             | 2,503 cps         | 41.9 %        |
| 166Er (KED) | 0.019 ppb             | 2,368 cps         | 41.8 %        |
| 169Tm (KED) | 0.010 ppb             | 3,205 cps         | 88.6 %        |
| 174Yb (KED) | 0.016 ppb             | 1,895 cps         | 41.3 %        |
| 175Lu (KED) | -0.044 ppb            | 35,221 cps        | 3.3 %         |
| 205Tl (KED) | 0.017 ppb             | 3,466 cps         | 42.7 %        |
| 208Pb (KED) | -3.754 ppb            | 88,085 cps        | 2.1 %         |
| 209Bi (KED) | 90.625 %              | 3,806,076 cps     | 1.2 %         |
| 232Th (KED) | 0.167 ppb             | 45,252 cps        | 23.2 %        |
| 238U (KED)  | 0.034 ppb             | 12,898 cps        | 22.0 %        |

## Sample Summary

Instrument ID: iCAP Q

Analysis index: 6

Analysis name: 322jian

Analysis started at: 9/3/2021 4:05:52 PM

User name: WINDOWS-UPCI4ER\Administrator

| Category    | Concentration average | Concentration RSD |
|-------------|-----------------------|-------------------|
| 6Li (KED)   | 131.017 %             | 3.6 %             |
| 9Be (KED)   | 0.028 ppb             | 39.6 %            |
| 11B (KED)   | 228.366 ppb           | 0.2 %             |
| 24Mg (KED)  | 277.158 ppb           | 2.1 %             |
| 27Al (KED)  | 274.590 ppb           | 1.7 %             |
| 45Sc (KED)  | 119.937 %             | 1.6 %             |
| 51V (KED)   | 0.469 ppb             | 1.8 %             |
| 52Cr (KED)  | 1.829 ppb             | 0.6 %             |
| 55Mn (KED)  | 5.736 ppb             | 1.7 %             |
| 56Fe (KED)  | 282.768 ppb           | 0.8 %             |
| 58Ni (KED)  | 0.238 ppb             | 14.2 %            |
| 59Co (KED)  | 0.167 ppb             | 6.2 %             |
| 63Cu (KED)  | -19.960 ppb           | 1.5 %             |
| 64Zn (KED)  | 216.007 ppb           | 2.4 %             |
| 69Ga (KED)  | 0.179 ppb             | 6.3 %             |
| 75As (KED)  | 0.117 ppb             | 39.6 %            |
| 80Se (KED)  | 0.913 ppb             | 23.9 %            |
| 85Rb (KED)  | 1.268 ppb             | 1.7 %             |
| 88Sr (KED)  | 3.885 ppb             | 2.6 %             |
| 89Y (KED)   | 106.892 %             | 0.9 %             |
| 107Ag (KED) | 0.176 ppb             | 60.2 %            |
| 114Cd (KED) | 0.109 ppb             | 72.7 %            |
| 115In (KED) | 98.063 %              | 0.2 %             |
| 133Cs (KED) | 0.086 ppb             | 84.1 %            |
| 138Ba (KED) | 0.692 ppb             | 19.4 %            |
| 139La (KED) | 0.237 ppb             | 18.0 %            |
| 140Ce (KED) | 0.473 ppb             | 8.1 %             |
| 141Pr (KED) | 0.072 ppb             | 47.5 %            |
| 142Nd (KED) | 0.283 ppb             | 9.3 %             |
| 152Sm (KED) | 0.048 ppb             | 45.6 %            |
| 153Eu (KED) | 0.020 ppb             | 103.9 %           |
| 158Gd (KED) | 0.044 ppb             | 39.7 %            |
| 159Tb (KED) | 99.659 %              | 2.5 %             |
| 164Dy (KED) | 0.029 ppb             | 42.9 %            |
| 166Er (KED) | 0.016 ppb             | 63.5 %            |
| 169Tm (KED) | 0.008 ppb             | 121.1 %           |
| 174Yb (KED) | 0.015 ppb             | 63.1 %            |
| 175Lu (KED) | -0.063 ppb            | 7.7 %             |
| 205Tl (KED) | 0.011 ppb             | 57.1 %            |
| 208Pb (KED) | -3.721 ppb            | 0.3 %             |
| 209Bi (KED) | 86.001 %              | 0.8 %             |
| 232Th (KED) | 0.092 ppb             | 9.4 %             |
| 238U (KED)  | 0.023 ppb             | 23.0 %            |

| Category   | Concentration average | Intensity average | Intensity RSD |
|------------|-----------------------|-------------------|---------------|
| 6Li (KED)  | 131.017 %             | 3,305 cps         | 3.6 %         |
| 9Be (KED)  | 0.028 ppb             | 4 cps             | 43.3 %        |
| 11B (KED)  | 228.366 ppb           | 469 cps           | 3.4 %         |
| 24Mg (KED) | 277.158 ppb           | 148,984 cps       | 2.0 %         |
| 27Al (KED) | 274.590 ppb           | 35,098 cps        | 0.2 %         |

| Category    | Concentration average | Intensity average | Intensity RSD |
|-------------|-----------------------|-------------------|---------------|
| 45Sc (KED)  | 119.937 %             | 47,220 cps        | 1.6 %         |
| 51V (KED)   | 0.469 ppb             | 4,060 cps         | 0.3 %         |
| 52Cr (KED)  | 1.829 ppb             | 27,976 cps        | 1.3 %         |
| 55Mn (KED)  | 5.736 ppb             | 40,885 cps        | 1.7 %         |
| 56Fe (KED)  | 282.768 ppb           | 3,248,447 cps     | 1.0 %         |
| 58Ni (KED)  | 0.238 ppb             | 25,055 cps        | 0.9 %         |
| 59Co (KED)  | 0.167 ppb             | 4,604 cps         | 5.9 %         |
| 63Cu (KED)  | -19.960 ppb           | 125,773 cps       | 2.6 %         |
| 64Zn (KED)  | 216.007 ppb           | 762,538 cps       | 1.2 %         |
| 69Ga (KED)  | 0.179 ppb             | 4,190 cps         | 1.1 %         |
| 75As (KED)  | 0.117 ppb             | 284 cps           | 21.9 %        |
| 80Se (KED)  | 0.913 ppb             | 1,489 cps         | 5.1 %         |
| 85Rb (KED)  | 1.268 ppb             | 8,513 cps         | 0.8 %         |
| 88Sr (KED)  | 3.885 ppb             | 33,406 cps        | 3.0 %         |
| 89Y (KED)   | 106.892 %             | 414,201 cps       | 0.9 %         |
| 107Ag (KED) | 0.176 ppb             | 8,707 cps         | 58.9 %        |
| 114Cd (KED) | 0.109 ppb             | 3,738 cps         | 38.8 %        |
| 115In (KED) | 98.063 %              | 764,667 cps       | 0.2 %         |
| 133Cs (KED) | 0.086 ppb             | 2,845 cps         | 73.0 %        |
| 138Ba (KED) | 0.692 ppb             | 109,964 cps       | 5.2 %         |
| 139La (KED) | 0.237 ppb             | 20,859 cps        | 18.5 %        |
| 140Ce (KED) | 0.473 ppb             | 55,838 cps        | 9.0 %         |
| 141Pr (KED) | 0.072 ppb             | 9,002 cps         | 46.6 %        |
| 142Nd (KED) | 0.283 ppb             | 14,541 cps        | 9.7 %         |
| 152Sm (KED) | 0.048 ppb             | 2,330 cps         | 44.3 %        |
| 153Eu (KED) | 0.020 ppb             | 1,877 cps         | 100.2 %       |
| 158Gd (KED) | 0.044 ppb             | 2,890 cps         | 39.6 %        |
| 159Tb (KED) | 99.659 %              | 4,315,292 cps     | 2.5 %         |
| 164Dy (KED) | 0.029 ppb             | 2,210 cps         | 42.0 %        |
| 166Er (KED) | 0.016 ppb             | 2,017 cps         | 46.0 %        |
| 169Tm (KED) | 0.008 ppb             | 2,364 cps         | 118.8 %       |
| 174Yb (KED) | 0.015 ppb             | 1,654 cps         | 59.2 %        |
| 175Lu (KED) | -0.063 ppb            | 30,517 cps        | 3.6 %         |
| 205Tl (KED) | 0.011 ppb             | 2,169 cps         | 53.5 %        |
| 208Pb (KED) | -3.721 ppb            | 87,568 cps        | 0.8 %         |
| 209Bi (KED) | 86.001 %              | 3,611,871 cps     | 0.8 %         |
| 232Th (KED) | 0.092 ppb             | 23,964 cps        | 9.3 %         |
| 238U (KED)  | 0.023 ppb             | 9,018 cps         | 17.3 %        |

## Sample Summary

Instrument ID: iCAP Q

Analysis index: 7

Analysis name: 334jian

Analysis started at: 9/3/2021 4:09:47 PM

User name: WINDOWS-UPCI4ER\Administrator

| Category    | Concentration average | Concentration RSD |
|-------------|-----------------------|-------------------|
| 6Li (KED)   | 135.071 %             | 4.4 %             |
| 9Be (KED)   | 0.055 ppb             | 54.6 %            |
| 11B (KED)   | 214.125 ppb           | 1.0 %             |
| 24Mg (KED)  | 473.593 ppb           | 5.4 %             |
| 27Al (KED)  | 512.893 ppb           | 1.5 %             |
| 45Sc (KED)  | 118.178 %             | 2.2 %             |
| 51V (KED)   | 0.967 ppb             | 1.5 %             |
| 52Cr (KED)  | 2.181 ppb             | 4.9 %             |
| 55Mn (KED)  | 12.469 ppb            | 2.2 %             |
| 56Fe (KED)  | 538.535 ppb           | 1.7 %             |
| 58Ni (KED)  | 1.241 ppb             | 8.4 %             |
| 59Co (KED)  | 0.232 ppb             | 4.2 %             |
| 63Cu (KED)  | -23.081 ppb           | 0.6 %             |
| 64Zn (KED)  | 234.362 ppb           | 2.0 %             |
| 69Ga (KED)  | 0.634 ppb             | 5.8 %             |
| 75As (KED)  | 0.328 ppb             | 2.8 %             |
| 80Se (KED)  | 0.535 ppb             | 33.4 %            |
| 85Rb (KED)  | 1.629 ppb             | 4.0 %             |
| 88Sr (KED)  | 7.391 ppb             | 0.3 %             |
| 89Y (KED)   | 99.486 %              | 1.0 %             |
| 107Ag (KED) | 0.182 ppb             | 4.4 %             |
| 114Cd (KED) | -0.002 ppb            | 264.3 %           |
| 115In (KED) | 90.509 %              | 0.4 %             |
| 133Cs (KED) | 0.098 ppb             | 3.5 %             |
| 138Ba (KED) | 2.210 ppb             | 4.3 %             |
| 139La (KED) | 0.407 ppb             | 0.5 %             |
| 140Ce (KED) | 0.833 ppb             | 0.8 %             |
| 141Pr (KED) | 0.094 ppb             | 0.6 %             |
| 142Nd (KED) | 0.498 ppb             | 2.7 %             |
| 152Sm (KED) | 0.069 ppb             | 2.6 %             |
| 153Eu (KED) | 0.013 ppb             | 7.1 %             |
| 158Gd (KED) | 0.062 ppb             | 1.6 %             |
| 159Tb (KED) | 90.363 %              | 1.6 %             |
| 164Dy (KED) | 0.046 ppb             | 0.7 %             |
| 166Er (KED) | 0.022 ppb             | 3.0 %             |
| 169Tm (KED) | 0.004 ppb             | 16.3 %            |
| 174Yb (KED) | 0.018 ppb             | 1.8 %             |
| 175Lu (KED) | -0.074 ppb            | 5.5 %             |
| 205Tl (KED) | 0.014 ppb             | 52.9 %            |
| 208Pb (KED) | -3.134 ppb            | 1.5 %             |
| 209Bi (KED) | 75.553 %              | 0.4 %             |
| 232Th (KED) | 0.158 ppb             | 17.8 %            |
| 238U (KED)  | 0.051 ppb             | 46.5 %            |

| Category   | Concentration average | Intensity average | Intensity RSD |
|------------|-----------------------|-------------------|---------------|
| 6Li (KED)  | 135.071 %             | 3,407 cps         | 4.4 %         |
| 9Be (KED)  | 0.055 ppb             | 9 cps             | 57.3 %        |
| 11B (KED)  | 214.125 ppb           | 1,201 cps         | 7.6 %         |
| 24Mg (KED) | 473.593 ppb           | 257,764 cps       | 1.3 %         |
| 27Al (KED) | 512.893 ppb           | 62,632 cps        | 1.5 %         |

| Category    | Concentration average | Intensity average | Intensity RSD |
|-------------|-----------------------|-------------------|---------------|
| 45Sc (KED)  | 118.178 %             | 46,528 cps        | 2.2 %         |
| 51V (KED)   | 0.967 ppb             | 8,127 cps         | 1.8 %         |
| 52Cr (KED)  | 2.181 ppb             | 32,039 cps        | 2.2 %         |
| 55Mn (KED)  | 12.469 ppb            | 84,268 cps        | 0.3 %         |
| 56Fe (KED)  | 538.535 ppb           | 6,017,073 cps     | 0.7 %         |
| 58Ni (KED)  | 1.241 ppb             | 39,512 cps        | 1.8 %         |
| 59Co (KED)  | 0.232 ppb             | 6,135 cps         | 1.8 %         |
| 63Cu (KED)  | -23.081 ppb           | 81,379 cps        | 2.6 %         |
| 64Zn (KED)  | 234.362 ppb           | 759,798 cps       | 1.5 %         |
| 69Ga (KED)  | 0.634 ppb             | 6,341 cps         | 2.1 %         |
| 75As (KED)  | 0.328 ppb             | 519 cps           | 1.3 %         |
| 80Se (KED)  | 0.535 ppb             | 1,248 cps         | 6.0 %         |
| 85Rb (KED)  | 1.629 ppb             | 9,817 cps         | 3.1 %         |
| 88Sr (KED)  | 7.391 ppb             | 57,074 cps        | 1.0 %         |
| 89Y (KED)   | 99.486 %              | 385,505 cps       | 1.0 %         |
| 107Ag (KED) | 0.182 ppb             | 8,307 cps         | 4.2 %         |
| 114Cd (KED) | -0.002 ppb            | 1,576 cps         | 5.7 %         |
| 115In (KED) | 90.509 %              | 705,768 cps       | 0.4 %         |
| 133Cs (KED) | 0.098 ppb             | 2,946 cps         | 3.4 %         |
| 138Ba (KED) | 2.210 ppb             | 155,856 cps       | 3.2 %         |
| 139La (KED) | 0.407 ppb             | 31,623 cps        | 1.8 %         |
| 140Ce (KED) | 0.833 ppb             | 87,003 cps        | 2.4 %         |
| 141Pr (KED) | 0.094 ppb             | 10,521 cps        | 2.2 %         |
| 142Nd (KED) | 0.498 ppb             | 22,519 cps        | 1.8 %         |
| 152Sm (KED) | 0.069 ppb             | 2,968 cps         | 1.2 %         |
| 153Eu (KED) | 0.013 ppb             | 1,147 cps         | 8.1 %         |
| 158Gd (KED) | 0.062 ppb             | 3,676 cps         | 3.1 %         |
| 159Tb (KED) | 90.363 %              | 3,912,760 cps     | 1.6 %         |
| 164Dy (KED) | 0.046 ppb             | 3,061 cps         | 2.2 %         |
| 166Er (KED) | 0.022 ppb             | 2,300 cps         | 3.7 %         |
| 169Tm (KED) | 0.004 ppb             | 987 cps           | 16.7 %        |
| 174Yb (KED) | 0.018 ppb             | 1,862 cps         | 2.6 %         |
| 175Lu (KED) | -0.074 ppb            | 26,035 cps        | 3.0 %         |
| 205Tl (KED) | 0.014 ppb             | 2,346 cps         | 50.2 %        |
| 208Pb (KED) | -3.134 ppb            | 139,967 cps       | 3.5 %         |
| 209Bi (KED) | 75.553 %              | 3,173,104 cps     | 0.4 %         |
| 232Th (KED) | 0.158 ppb             | 35,660 cps        | 17.4 %        |
| 238U (KED)  | 0.051 ppb             | 14,977 cps        | 40.4 %        |

## Sample Summary

Instrument ID: iCAP Q

Analysis index: 8

Analysis name: 340jian

Analysis started at: 9/3/2021 4:13:14 PM

User name: WINDOWS-UPCI4ER\Administrator

| Category    | Concentration average | Concentration RSD |
|-------------|-----------------------|-------------------|
| 6Li (KED)   | 142.429 %             | 0.6 %             |
| 9Be (KED)   | 0.020 ppb             | 0.6 %             |
| 11B (KED)   | 230.709 ppb           | 0.2 %             |
| 24Mg (KED)  | 254.161 ppb           | 1.4 %             |
| 27Al (KED)  | 309.176 ppb           | 0.5 %             |
| 45Sc (KED)  | 122.937 %             | 1.0 %             |
| 51V (KED)   | 0.494 ppb             | 2.6 %             |
| 52Cr (KED)  | 2.008 ppb             | 2.0 %             |
| 55Mn (KED)  | 6.051 ppb             | 1.8 %             |
| 56Fe (KED)  | 294.641 ppb           | 1.8 %             |
| 58Ni (KED)  | 0.625 ppb             | 5.6 %             |
| 59Co (KED)  | 0.111 ppb             | 10.3 %            |
| 63Cu (KED)  | -20.404 ppb           | 1.0 %             |
| 64Zn (KED)  | 252.612 ppb           | 4.4 %             |
| 69Ga (KED)  | 0.279 ppb             | 18.2 %            |
| 75As (KED)  | 0.172 ppb             | 9.3 %             |
| 80Se (KED)  | 0.700 ppb             | 15.8 %            |
| 85Rb (KED)  | 1.086 ppb             | 7.0 %             |
| 88Sr (KED)  | 3.654 ppb             | 3.6 %             |
| 89Y (KED)   | 103.474 %             | 3.0 %             |
| 107Ag (KED) | 0.078 ppb             | 2.1 %             |
| 114Cd (KED) | 0.009 ppb             | 8.7 %             |
| 115In (KED) | 92.406 %              | 1.6 %             |
| 133Cs (KED) | 0.049 ppb             | 9.0 %             |
| 138Ba (KED) | 0.822 ppb             | 5.8 %             |
| 139La (KED) | 0.236 ppb             | 2.0 %             |
| 140Ce (KED) | 0.493 ppb             | 0.5 %             |
| 141Pr (KED) | 0.053 ppb             | 3.8 %             |
| 142Nd (KED) | 0.298 ppb             | 3.2 %             |
| 152Sm (KED) | 0.039 ppb             | 5.1 %             |
| 153Eu (KED) | 0.009 ppb             | 3.9 %             |
| 158Gd (KED) | 0.035 ppb             | 1.3 %             |
| 159Tb (KED) | 93.120 %              | 1.3 %             |
| 164Dy (KED) | 0.026 ppb             | 6.6 %             |
| 166Er (KED) | 0.011 ppb             | 6.3 %             |
| 169Tm (KED) | 0.002 ppb             | 25.5 %            |
| 174Yb (KED) | 0.009 ppb             | 5.0 %             |
| 175Lu (KED) | -0.079 ppb            | 1.7 %             |
| 205Tl (KED) | 0.006 ppb             | 6.3 %             |
| 208Pb (KED) | -3.641 ppb            | 0.3 %             |
| 209Bi (KED) | 78.640 %              | 2.0 %             |
| 232Th (KED) | 0.079 ppb             | 2.1 %             |
| 238U (KED)  | 0.019 ppb             | 4.8 %             |

| Category   | Concentration average | Intensity average | Intensity RSD |
|------------|-----------------------|-------------------|---------------|
| 6Li (KED)  | 142.429 %             | 3,593 cps         | 0.6 %         |
| 9Be (KED)  | 0.020 ppb             | 3 cps             | 0.0 %         |
| 11B (KED)  | 230.709 ppb           | 386 cps           | 7.4 %         |
| 24Mg (KED) | 254.161 ppb           | 149,125 cps       | 0.9 %         |
| 27Al (KED) | 309.176 ppb           | 40,218 cps        | 1.3 %         |

| Category    | Concentration average | Intensity average | Intensity RSD |
|-------------|-----------------------|-------------------|---------------|
| 45Sc (KED)  | 122.937 %             | 48,401 cps        | 1.0 %         |
| 51V (KED)   | 0.494 ppb             | 4,383 cps         | 3.1 %         |
| 52Cr (KED)  | 2.008 ppb             | 31,051 cps        | 1.8 %         |
| 55Mn (KED)  | 6.051 ppb             | 44,045 cps        | 1.5 %         |
| 56Fe (KED)  | 294.641 ppb           | 3,465,581 cps     | 0.8 %         |
| 58Ni (KED)  | 0.625 ppb             | 31,641 cps        | 0.8 %         |
| 59Co (KED)  | 0.111 ppb             | 3,277 cps         | 8.2 %         |
| 63Cu (KED)  | -20.404 ppb           | 116,428 cps       | 0.9 %         |
| 64Zn (KED)  | 252.612 ppb           | 841,439 cps       | 1.1 %         |
| 69Ga (KED)  | 0.279 ppb             | 4,605 cps         | 3.5 %         |
| 75As (KED)  | 0.172 ppb             | 343 cps           | 2.9 %         |
| 80Se (KED)  | 0.700 ppb             | 1,361 cps         | 6.1 %         |
| 85Rb (KED)  | 1.086 ppb             | 7,234 cps         | 3.1 %         |
| 88Sr (KED)  | 3.654 ppb             | 30,533 cps        | 2.1 %         |
| 89Y (KED)   | 103.474 %             | 400,957 cps       | 3.0 %         |
| 107Ag (KED) | 0.078 ppb             | 3,743 cps         | 3.5 %         |
| 114Cd (KED) | 0.009 ppb             | 1,798 cps         | 2.2 %         |
| 115In (KED) | 92.406 %              | 720,557 cps       | 1.6 %         |
| 133Cs (KED) | 0.049 ppb             | 1,687 cps         | 5.9 %         |
| 138Ba (KED) | 0.822 ppb             | 107,708 cps       | 2.0 %         |
| 139La (KED) | 0.236 ppb             | 19,323 cps        | 2.6 %         |
| 140Ce (KED) | 0.493 ppb             | 54,265 cps        | 1.5 %         |
| 141Pr (KED) | 0.053 ppb             | 6,258 cps         | 3.9 %         |
| 142Nd (KED) | 0.298 ppb             | 14,252 cps        | 3.2 %         |
| 152Sm (KED) | 0.039 ppb             | 1,781 cps         | 3.6 %         |
| 153Eu (KED) | 0.009 ppb             | 817 cps           | 4.5 %         |
| 158Gd (KED) | 0.035 ppb             | 2,178 cps         | 2.0 %         |
| 159Tb (KED) | 93.120 %              | 4,032,148 cps     | 1.3 %         |
| 164Dy (KED) | 0.026 ppb             | 1,853 cps         | 7.3 %         |
| 166Er (KED) | 0.011 ppb             | 1,482 cps         | 4.9 %         |
| 169Tm (KED) | 0.002 ppb             | 597 cps           | 23.8 %        |
| 174Yb (KED) | 0.009 ppb             | 1,041 cps         | 5.6 %         |
| 175Lu (KED) | -0.079 ppb            | 26,045 cps        | 0.9 %         |
| 205Tl (KED) | 0.006 ppb             | 1,196 cps         | 6.8 %         |
| 208Pb (KED) | -3.641 ppb            | 89,041 cps        | 0.9 %         |
| 209Bi (KED) | 78.640 %              | 3,302,720 cps     | 2.0 %         |
| 232Th (KED) | 0.079 ppb             | 19,020 cps        | 1.8 %         |
| 238U (KED)  | 0.019 ppb             | 7,112 cps         | 3.1 %         |

## Sample Summary

Instrument ID: iCAP Q

Analysis index: 9

Analysis name: 336jian

Analysis started at: 9/3/2021 4:16:41 PM

User name: WINDOWS-UPCI4ER\Administrator

| Category    | Concentration average | Concentration RSD |
|-------------|-----------------------|-------------------|
| 6Li (KED)   | 141.548 %             | 3.5 %             |
| 9Be (KED)   | 0.013 ppb             | 86.6 %            |
| 11B (KED)   | 222.673 ppb           | 0.2 %             |
| 24Mg (KED)  | 272.258 ppb           | 5.1 %             |
| 27Al (KED)  | 254.642 ppb           | 2.5 %             |
| 45Sc (KED)  | 126.468 %             | 1.9 %             |
| 51V (KED)   | 0.414 ppb             | 3.0 %             |
| 52Cr (KED)  | 1.265 ppb             | 1.2 %             |
| 55Mn (KED)  | 5.765 ppb             | 0.2 %             |
| 56Fe (KED)  | 243.649 ppb           | 0.7 %             |
| 58Ni (KED)  | 0.047 ppb             | 73.3 %            |
| 59Co (KED)  | 0.095 ppb             | 7.5 %             |
| 63Cu (KED)  | -19.944 ppb           | 1.6 %             |
| 64Zn (KED)  | 230.568 ppb           | 1.2 %             |
| 69Ga (KED)  | 0.545 ppb             | 1.0 %             |
| 75As (KED)  | 0.132 ppb             | 26.9 %            |
| 80Se (KED)  | 0.630 ppb             | 25.3 %            |
| 85Rb (KED)  | 1.275 ppb             | 0.6 %             |
| 88Sr (KED)  | 4.129 ppb             | 1.4 %             |
| 89Y (KED)   | 102.682 %             | 0.5 %             |
| 107Ag (KED) | 0.046 ppb             | 9.8 %             |
| 114Cd (KED) | 0.011 ppb             | 32.3 %            |
| 115In (KED) | 91.571 %              | 0.6 %             |
| 133Cs (KED) | 0.049 ppb             | 12.2 %            |
| 138Ba (KED) | 1.794 ppb             | 7.8 %             |
| 139La (KED) | 0.194 ppb             | 3.7 %             |
| 140Ce (KED) | 0.408 ppb             | 2.9 %             |
| 141Pr (KED) | 0.044 ppb             | 5.0 %             |
| 142Nd (KED) | 0.236 ppb             | 3.4 %             |
| 152Sm (KED) | 0.033 ppb             | 5.6 %             |
| 153Eu (KED) | 0.006 ppb             | 12.1 %            |
| 158Gd (KED) | 0.029 ppb             | 8.6 %             |
| 159Tb (KED) | 91.546 %              | 2.5 %             |
| 164Dy (KED) | 0.021 ppb             | 8.8 %             |
| 166Er (KED) | 0.010 ppb             | 9.1 %             |
| 169Tm (KED) | 0.002 ppb             | 4.2 %             |
| 174Yb (KED) | 0.008 ppb             | 2.3 %             |
| 175Lu (KED) | -0.082 ppb            | 5.9 %             |
| 205Tl (KED) | 0.008 ppb             | 5.5 %             |
| 208Pb (KED) | -3.438 ppb            | 0.7 %             |
| 209Bi (KED) | 73.376 %              | 1.5 %             |
| 232Th (KED) | 0.071 ppb             | 1.3 %             |
| 238U (KED)  | 0.018 ppb             | 3.2 %             |

| Category   | Concentration average | Intensity average | Intensity RSD |
|------------|-----------------------|-------------------|---------------|
| 6Li (KED)  | 141.548 %             | 3,571 cps         | 3.5 %         |
| 9Be (KED)  | 0.013 ppb             | 2 cps             | 86.6 %        |
| 11B (KED)  | 222.673 ppb           | 809 cps           | 6.4 %         |
| 24Mg (KED) | 272.258 ppb           | 158,121 cps       | 1.4 %         |
| 27Al (KED) | 254.642 ppb           | 34,492 cps        | 0.6 %         |

| Category    | Concentration average | Intensity average | Intensity RSD |
|-------------|-----------------------|-------------------|---------------|
| 45Sc (KED)  | 126.468 %             | 49,791 cps        | 1.9 %         |
| 51V (KED)   | 0.414 ppb             | 3,797 cps         | 1.6 %         |
| 52Cr (KED)  | 1.265 ppb             | 21,796 cps        | 1.2 %         |
| 55Mn (KED)  | 5.765 ppb             | 43,315 cps        | 2.0 %         |
| 56Fe (KED)  | 243.649 ppb           | 2,964,148 cps     | 1.3 %         |
| 58Ni (KED)  | 0.047 ppb             | 23,380 cps        | 0.6 %         |
| 59Co (KED)  | 0.095 ppb             | 2,946 cps         | 4.9 %         |
| 63Cu (KED)  | -19.944 ppb           | 121,023 cps       | 3.5 %         |
| 64Zn (KED)  | 230.568 ppb           | 773,592 cps       | 1.4 %         |
| 69Ga (KED)  | 0.545 ppb             | 6,054 cps         | 0.7 %         |
| 75As (KED)  | 0.132 ppb             | 291 cps           | 14.8 %        |
| 80Se (KED)  | 0.630 ppb             | 1,323 cps         | 4.6 %         |
| 85Rb (KED)  | 1.275 ppb             | 8,215 cps         | 0.1 %         |
| 88Sr (KED)  | 4.129 ppb             | 33,950 cps        | 1.1 %         |
| 89Y (KED)   | 102.682 %             | 397,888 cps       | 0.5 %         |
| 107Ag (KED) | 0.046 ppb             | 2,238 cps         | 9.2 %         |
| 114Cd (KED) | 0.011 ppb             | 1,808 cps         | 3.8 %         |
| 115In (KED) | 91.571 %              | 714,047 cps       | 0.6 %         |
| 133Cs (KED) | 0.049 ppb             | 1,667 cps         | 9.2 %         |
| 138Ba (KED) | 1.794 ppb             | 142,233 cps       | 2.1 %         |
| 139La (KED) | 0.194 ppb             | 15,800 cps        | 1.5 %         |
| 140Ce (KED) | 0.408 ppb             | 44,623 cps        | 0.4 %         |
| 141Pr (KED) | 0.044 ppb             | 5,243 cps         | 3.4 %         |
| 142Nd (KED) | 0.236 ppb             | 11,290 cps        | 2.2 %         |
| 152Sm (KED) | 0.033 ppb             | 1,503 cps         | 6.7 %         |
| 153Eu (KED) | 0.006 ppb             | 607 cps           | 8.3 %         |
| 158Gd (KED) | 0.029 ppb             | 1,826 cps         | 5.8 %         |
| 159Tb (KED) | 91.546 %              | 3,963,978 cps     | 2.5 %         |
| 164Dy (KED) | 0.021 ppb             | 1,502 cps         | 5.7 %         |
| 166Er (KED) | 0.010 ppb             | 1,312 cps         | 5.2 %         |
| 169Tm (KED) | 0.002 ppb             | 477 cps           | 3.6 %         |
| 174Yb (KED) | 0.008 ppb             | 930 cps           | 1.9 %         |
| 175Lu (KED) | -0.082 ppb            | 25,181 cps        | 0.6 %         |
| 205Tl (KED) | 0.008 ppb             | 1,310 cps         | 5.0 %         |
| 208Pb (KED) | -3.438 ppb            | 104,327 cps       | 3.2 %         |
| 209Bi (KED) | 73.376 %              | 3,081,667 cps     | 1.5 %         |
| 232Th (KED) | 0.071 ppb             | 15,906 cps        | 2.3 %         |
| 238U (KED)  | 0.018 ppb             | 6,528 cps         | 1.4 %         |

## Sample Summary

Instrument ID: iCAP Q

Analysis index: 10

Analysis name: 332jian

Analysis started at: 9/3/2021 4:20:15 PM

User name: WINDOWS-UPCI4ER\Administrator

| Category    | Concentration average | Concentration RSD |
|-------------|-----------------------|-------------------|
| 6Li (KED)   | 141.239 %             | 1.1 %             |
| 9Be (KED)   | 0.020 ppb             | 100.2 %           |
| 11B (KED)   | 231.450 ppb           | 0.3 %             |
| 24Mg (KED)  | 323.264 ppb           | 1.8 %             |
| 27Al (KED)  | 426.006 ppb           | 0.9 %             |
| 45Sc (KED)  | 124.920 %             | 1.6 %             |
| 51V (KED)   | 0.680 ppb             | 1.5 %             |
| 52Cr (KED)  | 1.888 ppb             | 2.2 %             |
| 55Mn (KED)  | 8.251 ppb             | 3.3 %             |
| 56Fe (KED)  | 411.079 ppb           | 1.0 %             |
| 58Ni (KED)  | 0.610 ppb             | 8.6 %             |
| 59Co (KED)  | 0.213 ppb             | 8.1 %             |
| 63Cu (KED)  | -22.297 ppb           | 0.5 %             |
| 64Zn (KED)  | 258.660 ppb           | 0.5 %             |
| 69Ga (KED)  | 0.527 ppb             | 5.6 %             |
| 75As (KED)  | 0.246 ppb             | 12.8 %            |
| 80Se (KED)  | 0.664 ppb             | 8.6 %             |
| 85Rb (KED)  | 1.320 ppb             | 4.5 %             |
| 88Sr (KED)  | 4.498 ppb             | 3.0 %             |
| 89Y (KED)   | 102.546 %             | 1.1 %             |
| 107Ag (KED) | 0.069 ppb             | 4.8 %             |
| 114Cd (KED) | 0.021 ppb             | 11.0 %            |
| 115In (KED) | 89.268 %              | 0.4 %             |
| 133Cs (KED) | 0.074 ppb             | 2.3 %             |
| 138Ba (KED) | 1.568 ppb             | 13.6 %            |
| 139La (KED) | 0.371 ppb             | 2.5 %             |
| 140Ce (KED) | 0.759 ppb             | 1.6 %             |
| 141Pr (KED) | 0.079 ppb             | 5.7 %             |
| 142Nd (KED) | 0.445 ppb             | 0.9 %             |
| 152Sm (KED) | 0.054 ppb             | 4.7 %             |
| 153Eu (KED) | 0.011 ppb             | 3.2 %             |
| 158Gd (KED) | 0.047 ppb             | 1.6 %             |
| 159Tb (KED) | 89.232 %              | 1.9 %             |
| 164Dy (KED) | 0.032 ppb             | 4.6 %             |
| 166Er (KED) | 0.015 ppb             | 8.7 %             |
| 169Tm (KED) | 0.002 ppb             | 7.0 %             |
| 174Yb (KED) | 0.013 ppb             | 4.8 %             |
| 175Lu (KED) | -0.090 ppb            | 11.1 %            |
| 205Tl (KED) | 0.007 ppb             | 7.3 %             |
| 208Pb (KED) | -3.533 ppb            | 0.4 %             |
| 209Bi (KED) | 74.208 %              | 1.2 %             |
| 232Th (KED) | 0.104 ppb             | 1.3 %             |
| 238U (KED)  | 0.030 ppb             | 2.3 %             |

| Category   | Concentration average | Intensity average | Intensity RSD |
|------------|-----------------------|-------------------|---------------|
| 6Li (KED)  | 141.239 %             | 3,563 cps         | 1.1 %         |
| 9Be (KED)  | 0.020 ppb             | 3 cps             | 100.0 %       |
| 11B (KED)  | 231.450 ppb           | 343 cps           | 9.9 %         |
| 24Mg (KED) | 323.264 ppb           | 186,310 cps       | 1.2 %         |
| 27Al (KED) | 426.006 ppb           | 55,403 cps        | 1.6 %         |

| Category    | Concentration average | Intensity average | Intensity RSD |
|-------------|-----------------------|-------------------|---------------|
| 45Sc (KED)  | 124.920 %             | 49,182 cps        | 1.6 %         |
| 51V (KED)   | 0.680 ppb             | 6,077 cps         | 2.7 %         |
| 52Cr (KED)  | 1.888 ppb             | 29,930 cps        | 0.3 %         |
| 55Mn (KED)  | 8.251 ppb             | 59,938 cps        | 1.5 %         |
| 56Fe (KED)  | 411.079 ppb           | 4,877,235 cps     | 0.6 %         |
| 58Ni (KED)  | 0.610 ppb             | 31,915 cps        | 1.6 %         |
| 59Co (KED)  | 0.213 ppb             | 5,993 cps         | 8.7 %         |
| 63Cu (KED)  | -22.297 ppb           | 93,109 cps        | 0.5 %         |
| 64Zn (KED)  | 258.660 ppb           | 851,526 cps       | 1.5 %         |
| 69Ga (KED)  | 0.527 ppb             | 5,941 cps         | 3.3 %         |
| 75As (KED)  | 0.246 ppb             | 432 cps           | 8.2 %         |
| 80Se (KED)  | 0.664 ppb             | 1,335 cps         | 1.7 %         |
| 85Rb (KED)  | 1.320 ppb             | 8,443 cps         | 2.8 %         |
| 88Sr (KED)  | 4.498 ppb             | 36,718 cps        | 1.8 %         |
| 89Y (KED)   | 102.546 %             | 397,359 cps       | 1.1 %         |
| 107Ag (KED) | 0.069 ppb             | 3,208 cps         | 4.3 %         |
| 114Cd (KED) | 0.021 ppb             | 1,929 cps         | 1.9 %         |
| 115In (KED) | 89.268 %              | 696,086 cps       | 0.4 %         |
| 133Cs (KED) | 0.074 ppb             | 2,297 cps         | 2.1 %         |
| 138Ba (KED) | 1.568 ppb             | 130,380 cps       | 4.3 %         |
| 139La (KED) | 0.371 ppb             | 28,527 cps        | 0.5 %         |
| 140Ce (KED) | 0.759 ppb             | 78,499 cps        | 0.7 %         |
| 141Pr (KED) | 0.079 ppb             | 8,834 cps         | 3.5 %         |
| 142Nd (KED) | 0.445 ppb             | 19,994 cps        | 2.1 %         |
| 152Sm (KED) | 0.054 ppb             | 2,311 cps         | 4.4 %         |
| 153Eu (KED) | 0.011 ppb             | 937 cps           | 2.2 %         |
| 158Gd (KED) | 0.047 ppb             | 2,748 cps         | 0.9 %         |
| 159Tb (KED) | 89.232 %              | 3,863,774 cps     | 1.9 %         |
| 164Dy (KED) | 0.032 ppb             | 2,142 cps         | 4.2 %         |
| 166Er (KED) | 0.015 ppb             | 1,681 cps         | 6.8 %         |
| 169Tm (KED) | 0.002 ppb             | 654 cps           | 4.5 %         |
| 174Yb (KED) | 0.013 ppb             | 1,295 cps         | 6.2 %         |
| 175Lu (KED) | -0.090 ppb            | 23,202 cps        | 6.5 %         |
| 205Tl (KED) | 0.007 ppb             | 1,231 cps         | 7.6 %         |
| 208Pb (KED) | -3.533 ppb            | 95,462 cps        | 0.3 %         |
| 209Bi (KED) | 74.208 %              | 3,116,620 cps     | 1.2 %         |
| 232Th (KED) | 0.104 ppb             | 23,400 cps        | 2.3 %         |
| 238U (KED)  | 0.030 ppb             | 9,420 cps         | 1.8 %         |

## Sample Summary

Instrument ID: iCAP Q

Analysis index: 11

Analysis name: 330jian

Analysis started at: 9/3/2021 4:23:34 PM

User name: WINDOWS-UPCI4ER\Administrator

| Category    | Concentration average | Concentration RSD |
|-------------|-----------------------|-------------------|
| 6Li (KED)   | 142.693 %             | 5.9 %             |
| 9Be (KED)   | 0.007 ppb             | 173.2 %           |
| 11B (KED)   | 227.447 ppb           | 0.5 %             |
| 24Mg (KED)  | 313.591 ppb           | 5.9 %             |
| 27Al (KED)  | 389.227 ppb           | 1.1 %             |
| 45Sc (KED)  | 123.359 %             | 1.7 %             |
| 51V (KED)   | 0.616 ppb             | 1.2 %             |
| 52Cr (KED)  | 1.505 ppb             | 2.1 %             |
| 55Mn (KED)  | 8.574 ppb             | 1.2 %             |
| 56Fe (KED)  | 369.731 ppb           | 0.7 %             |
| 58Ni (KED)  | 0.437 ppb             | 13.1 %            |
| 59Co (KED)  | 0.260 ppb             | 3.7 %             |
| 63Cu (KED)  | -18.788 ppb           | 1.4 %             |
| 64Zn (KED)  | 259.724 ppb           | 3.1 %             |
| 69Ga (KED)  | 0.415 ppb             | 4.2 %             |
| 75As (KED)  | 0.176 ppb             | 8.1 %             |
| 80Se (KED)  | 0.348 ppb             | 35.7 %            |
| 85Rb (KED)  | 1.097 ppb             | 2.2 %             |
| 88Sr (KED)  | 5.191 ppb             | 5.1 %             |
| 89Y (KED)   | 99.729 %              | 2.7 %             |
| 107Ag (KED) | 0.037 ppb             | 3.8 %             |
| 114Cd (KED) | -0.027 ppb            | 15.8 %            |
| 115In (KED) | 89.799 %              | 0.9 %             |
| 133Cs (KED) | 0.070 ppb             | 5.0 %             |
| 138Ba (KED) | 1.175 ppb             | 1.4 %             |
| 139La (KED) | 0.315 ppb             | 3.6 %             |
| 140Ce (KED) | 0.680 ppb             | 3.4 %             |
| 141Pr (KED) | 0.071 ppb             | 2.4 %             |
| 142Nd (KED) | 0.406 ppb             | 1.1 %             |
| 152Sm (KED) | 0.053 ppb             | 3.7 %             |
| 153Eu (KED) | 0.010 ppb             | 4.6 %             |
| 158Gd (KED) | 0.050 ppb             | 5.2 %             |
| 159Tb (KED) | 90.291 %              | 1.2 %             |
| 164Dy (KED) | 0.035 ppb             | 4.2 %             |
| 166Er (KED) | 0.015 ppb             | 6.3 %             |
| 169Tm (KED) | 0.002 ppb             | 8.7 %             |
| 174Yb (KED) | 0.013 ppb             | 7.5 %             |
| 175Lu (KED) | -0.094 ppb            | 1.5 %             |
| 205Tl (KED) | 0.006 ppb             | 2.4 %             |
| 208Pb (KED) | -3.660 ppb            | 0.7 %             |
| 209Bi (KED) | 73.058 %              | 1.1 %             |
| 232Th (KED) | 0.117 ppb             | 4.6 %             |
| 238U (KED)  | 0.025 ppb             | 8.0 %             |

| Category   | Concentration average | Intensity average | Intensity RSD |
|------------|-----------------------|-------------------|---------------|
| 6Li (KED)  | 142.693 %             | 3,599 cps         | 5.9 %         |
| 9Be (KED)  | 0.007 ppb             | 1 cps             | 173.2 %       |
| 11B (KED)  | 227.447 ppb           | 558 cps           | 6.7 %         |
| 24Mg (KED) | 313.591 ppb           | 182,412 cps       | 1.4 %         |
| 27Al (KED) | 389.227 ppb           | 50,188 cps        | 1.0 %         |

| Category    | Concentration average | Intensity average | Intensity RSD |
|-------------|-----------------------|-------------------|---------------|
| 45Sc (KED)  | 123.359 %             | 48,568 cps        | 1.7 %         |
| 51V (KED)   | 0.616 ppb             | 5,449 cps         | 0.7 %         |
| 52Cr (KED)  | 1.505 ppb             | 24,457 cps        | 3.4 %         |
| 55Mn (KED)  | 8.574 ppb             | 61,423 cps        | 2.6 %         |
| 56Fe (KED)  | 369.731 ppb           | 4,341,018 cps     | 1.0 %         |
| 58Ni (KED)  | 0.437 ppb             | 28,840 cps        | 2.0 %         |
| 59Co (KED)  | 0.260 ppb             | 7,143 cps         | 4.3 %         |
| 63Cu (KED)  | -18.788 ppb           | 130,730 cps       | 0.6 %         |
| 64Zn (KED)  | 259.724 ppb           | 830,622 cps       | 0.1 %         |
| 69Ga (KED)  | 0.415 ppb             | 5,177 cps         | 1.3 %         |
| 75As (KED)  | 0.176 ppb             | 337 cps           | 6.2 %         |
| 80Se (KED)  | 0.348 ppb             | 1,181 cps         | 2.4 %         |
| 85Rb (KED)  | 1.097 ppb             | 7,041 cps         | 2.6 %         |
| 88Sr (KED)  | 5.191 ppb             | 40,829 cps        | 2.0 %         |
| 89Y (KED)   | 99.729 %              | 386,444 cps       | 2.7 %         |
| 107Ag (KED) | 0.037 ppb             | 1,788 cps         | 4.1 %         |
| 114Cd (KED) | -0.027 ppb            | 1,141 cps         | 5.4 %         |
| 115In (KED) | 89.799 %              | 700,228 cps       | 0.9 %         |
| 133Cs (KED) | 0.070 ppb             | 2,191 cps         | 3.5 %         |
| 138Ba (KED) | 1.175 ppb             | 117,497 cps       | 0.7 %         |
| 139La (KED) | 0.315 ppb             | 24,721 cps        | 2.4 %         |
| 140Ce (KED) | 0.680 ppb             | 71,385 cps        | 2.1 %         |
| 141Pr (KED) | 0.071 ppb             | 8,056 cps         | 1.9 %         |
| 142Nd (KED) | 0.406 ppb             | 18,510 cps        | 0.5 %         |
| 152Sm (KED) | 0.053 ppb             | 2,295 cps         | 4.2 %         |
| 153Eu (KED) | 0.010 ppb             | 864 cps           | 4.2 %         |
| 158Gd (KED) | 0.050 ppb             | 2,961 cps         | 4.2 %         |
| 159Tb (KED) | 90.291 %              | 3,909,661 cps     | 1.2 %         |
| 164Dy (KED) | 0.035 ppb             | 2,365 cps         | 4.5 %         |
| 166Er (KED) | 0.015 ppb             | 1,705 cps         | 4.8 %         |
| 169Tm (KED) | 0.002 ppb             | 620 cps           | 7.5 %         |
| 174Yb (KED) | 0.013 ppb             | 1,361 cps         | 5.6 %         |
| 175Lu (KED) | -0.094 ppb            | 22,967 cps        | 0.2 %         |
| 205Tl (KED) | 0.006 ppb             | 1,048 cps         | 1.3 %         |
| 208Pb (KED) | -3.660 ppb            | 80,714 cps        | 2.3 %         |
| 209Bi (KED) | 73.058 %              | 3,068,293 cps     | 1.1 %         |
| 232Th (KED) | 0.117 ppb             | 25,698 cps        | 3.4 %         |
| 238U (KED)  | 0.025 ppb             | 8,227 cps         | 5.6 %         |

## Sample Summary

Instrument ID: iCAP Q

Analysis index: 12

Analysis name: 326jian

Analysis started at: 9/3/2021 4:26:51 PM

User name: WINDOWS-UPCI4ER\Administrator

| Category    | Concentration average | Concentration RSD |
|-------------|-----------------------|-------------------|
| 6Li (KED)   | 143.795 %             | 2.2 %             |
| 9Be (KED)   | 0.020 ppb             | 173.2 %           |
| 11B (KED)   | 228.233 ppb           | 0.1 %             |
| 24Mg (KED)  | 211.241 ppb           | 2.2 %             |
| 27Al (KED)  | 240.841 ppb           | 1.1 %             |
| 45Sc (KED)  | 124.980 %             | 2.3 %             |
| 51V (KED)   | 0.388 ppb             | 4.4 %             |
| 52Cr (KED)  | 2.362 ppb             | 2.0 %             |
| 55Mn (KED)  | 4.492 ppb             | 1.0 %             |
| 56Fe (KED)  | 229.969 ppb           | 3.9 %             |
| 58Ni (KED)  | -0.142 ppb            | 28.8 %            |
| 59Co (KED)  | 0.130 ppb             | 3.8 %             |
| 63Cu (KED)  | -24.887 ppb           | 0.5 %             |
| 64Zn (KED)  | 275.070 ppb           | 3.1 %             |
| 69Ga (KED)  | 0.095 ppb             | 3.1 %             |
| 75As (KED)  | 0.169 ppb             | 19.9 %            |
| 80Se (KED)  | 0.969 ppb             | 30.8 %            |
| 85Rb (KED)  | 0.815 ppb             | 5.0 %             |
| 88Sr (KED)  | 3.196 ppb             | 2.1 %             |
| 89Y (KED)   | 101.596 %             | 1.3 %             |
| 107Ag (KED) | 0.042 ppb             | 11.1 %            |
| 114Cd (KED) | 0.051 ppb             | 7.0 %             |
| 115In (KED) | 93.442 %              | 1.6 %             |
| 133Cs (KED) | 0.036 ppb             | 13.5 %            |
| 138Ba (KED) | 0.135 ppb             | 41.4 %            |
| 139La (KED) | 0.191 ppb             | 2.2 %             |
| 140Ce (KED) | 0.398 ppb             | 3.0 %             |
| 141Pr (KED) | 0.043 ppb             | 6.8 %             |
| 142Nd (KED) | 0.240 ppb             | 1.5 %             |
| 152Sm (KED) | 0.029 ppb             | 9.1 %             |
| 153Eu (KED) | 0.005 ppb             | 5.6 %             |
| 158Gd (KED) | 0.026 ppb             | 3.8 %             |
| 159Tb (KED) | 91.646 %              | 1.3 %             |
| 164Dy (KED) | 0.018 ppb             | 5.1 %             |
| 166Er (KED) | 0.007 ppb             | 14.4 %            |
| 169Tm (KED) | 0.001 ppb             | 4.2 %             |
| 174Yb (KED) | 0.007 ppb             | 9.9 %             |
| 175Lu (KED) | -0.096 ppb            | 1.0 %             |
| 205Tl (KED) | 0.005 ppb             | 7.4 %             |
| 208Pb (KED) | -3.710 ppb            | 0.5 %             |
| 209Bi (KED) | 78.051 %              | 1.0 %             |
| 232Th (KED) | 0.064 ppb             | 3.8 %             |
| 238U (KED)  | 0.015 ppb             | 3.5 %             |

| Category   | Concentration average | Intensity average | Intensity RSD |
|------------|-----------------------|-------------------|---------------|
| 6Li (KED)  | 143.795 %             | 3,627 cps         | 2.2 %         |
| 9Be (KED)  | 0.020 ppb             | 3 cps             | 173.2 %       |
| 11B (KED)  | 228.233 ppb           | 522 cps           | 2.2 %         |
| 24Mg (KED) | 211.241 ppb           | 126,219 cps       | 0.6 %         |
| 27Al (KED) | 240.841 ppb           | 32,374 cps        | 1.5 %         |

| Category    | Concentration average | Intensity average | Intensity RSD |
|-------------|-----------------------|-------------------|---------------|
| 45Sc (KED)  | 124.980 %             | 49,206 cps        | 2.3 %         |
| 51V (KED)   | 0.388 ppb             | 3,524 cps         | 3.0 %         |
| 52Cr (KED)  | 2.362 ppb             | 36,348 cps        | 1.7 %         |
| 55Mn (KED)  | 4.492 ppb             | 34,000 cps        | 1.4 %         |
| 56Fe (KED)  | 229.969 ppb           | 2,768,606 cps     | 1.7 %         |
| 58Ni (KED)  | -0.142 ppb            | 20,154 cps        | 1.0 %         |
| 59Co (KED)  | 0.130 ppb             | 3,833 cps         | 4.5 %         |
| 63Cu (KED)  | -24.887 ppb           | 61,997 cps        | 1.0 %         |
| 64Zn (KED)  | 275.070 ppb           | 889,116 cps       | 1.5 %         |
| 69Ga (KED)  | 0.095 ppb             | 3,522 cps         | 1.7 %         |
| 75As (KED)  | 0.169 ppb             | 333 cps           | 12.1 %        |
| 80Se (KED)  | 0.969 ppb             | 1,436 cps         | 6.7 %         |
| 85Rb (KED)  | 0.815 ppb             | 5,659 cps         | 4.1 %         |
| 88Sr (KED)  | 3.196 ppb             | 26,528 cps        | 1.8 %         |
| 89Y (KED)   | 101.596 %             | 393,678 cps       | 1.3 %         |
| 107Ag (KED) | 0.042 ppb             | 2,118 cps         | 9.2 %         |
| 114Cd (KED) | 0.051 ppb             | 2,558 cps         | 0.9 %         |
| 115In (KED) | 93.442 %              | 728,636 cps       | 1.6 %         |
| 133Cs (KED) | 0.036 ppb             | 1,355 cps         | 11.0 %        |
| 138Ba (KED) | 0.135 ppb             | 80,254 cps        | 1.4 %         |
| 139La (KED) | 0.191 ppb             | 15,579 cps        | 1.0 %         |
| 140Ce (KED) | 0.398 ppb             | 43,623 cps        | 1.6 %         |
| 141Pr (KED) | 0.043 ppb             | 5,177 cps         | 5.0 %         |
| 142Nd (KED) | 0.240 ppb             | 11,469 cps        | 2.1 %         |
| 152Sm (KED) | 0.029 ppb             | 1,356 cps         | 8.5 %         |
| 153Eu (KED) | 0.005 ppb             | 510 cps           | 3.5 %         |
| 158Gd (KED) | 0.026 ppb             | 1,660 cps         | 4.0 %         |
| 159Tb (KED) | 91.646 %              | 3,968,299 cps     | 1.3 %         |
| 164Dy (KED) | 0.018 ppb             | 1,269 cps         | 4.0 %         |
| 166Er (KED) | 0.007 ppb             | 1,086 cps         | 6.8 %         |
| 169Tm (KED) | 0.001 ppb             | 361 cps           | 2.3 %         |
| 174Yb (KED) | 0.007 ppb             | 754 cps           | 7.1 %         |
| 175Lu (KED) | -0.096 ppb            | 23,007 cps        | 0.8 %         |
| 205Tl (KED) | 0.005 ppb             | 914 cps           | 5.7 %         |
| 208Pb (KED) | -3.710 ppb            | 80,689 cps        | 2.5 %         |
| 209Bi (KED) | 78.051 %              | 3,277,982 cps     | 1.0 %         |
| 232Th (KED) | 0.064 ppb             | 15,312 cps        | 2.6 %         |
| 238U (KED)  | 0.015 ppb             | 6,017 cps         | 2.2 %         |

## Sample Summary

Instrument ID: iCAP Q

Analysis index: 13

Analysis name: 00026jian

Analysis started at: 9/3/2021 4:30:18 PM

User name: WINDOWS-UPCI4ER\Administrator

| Category    | Concentration average | Concentration RSD |
|-------------|-----------------------|-------------------|
| 6Li (KED)   | 142.341 %             | 2.1 %             |
| 9Be (KED)   | 0.020 ppb             | 99.9 %            |
| 11B (KED)   | 229.031 ppb           | 0.6 %             |
| 24Mg (KED)  | 372.199 ppb           | 2.9 %             |
| 27Al (KED)  | 391.985 ppb           | 1.9 %             |
| 45Sc (KED)  | 127.663 %             | 0.8 %             |
| 51V (KED)   | 0.647 ppb             | 3.3 %             |
| 52Cr (KED)  | 6.862 ppb             | 1.4 %             |
| 55Mn (KED)  | 8.824 ppb             | 1.5 %             |
| 56Fe (KED)  | 452.940 ppb           | 1.3 %             |
| 58Ni (KED)  | 1.160 ppb             | 3.6 %             |
| 59Co (KED)  | 0.212 ppb             | 2.5 %             |
| 63Cu (KED)  | -13.635 ppb           | 1.6 %             |
| 64Zn (KED)  | 236.267 ppb           | 0.4 %             |
| 69Ga (KED)  | 1.368 ppb             | 0.9 %             |
| 75As (KED)  | 0.491 ppb             | 4.3 %             |
| 80Se (KED)  | 0.461 ppb             | 12.5 %            |
| 85Rb (KED)  | 2.125 ppb             | 3.6 %             |
| 88Sr (KED)  | 4.490 ppb             | 0.9 %             |
| 89Y (KED)   | 102.357 %             | 1.3 %             |
| 107Ag (KED) | 0.082 ppb             | 2.6 %             |
| 114Cd (KED) | 0.077 ppb             | 7.0 %             |
| 115In (KED) | 90.146 %              | 1.3 %             |
| 133Cs (KED) | 0.068 ppb             | 2.5 %             |
| 138Ba (KED) | 4.374 ppb             | 1.0 %             |
| 139La (KED) | 0.299 ppb             | 2.2 %             |
| 140Ce (KED) | 0.625 ppb             | 0.6 %             |
| 141Pr (KED) | 0.075 ppb             | 1.7 %             |
| 142Nd (KED) | 0.380 ppb             | 1.1 %             |
| 152Sm (KED) | 0.053 ppb             | 7.5 %             |
| 153Eu (KED) | 0.012 ppb             | 8.0 %             |
| 158Gd (KED) | 0.045 ppb             | 4.5 %             |
| 159Tb (KED) | 91.452 %              | 0.5 %             |
| 164Dy (KED) | 0.031 ppb             | 8.8 %             |
| 166Er (KED) | 0.015 ppb             | 4.7 %             |
| 169Tm (KED) | 0.002 ppb             | 9.9 %             |
| 174Yb (KED) | 0.012 ppb             | 5.7 %             |
| 175Lu (KED) | -0.101 ppb            | 1.9 %             |
| 205Tl (KED) | 0.011 ppb             | 9.1 %             |
| 208Pb (KED) | -3.128 ppb            | 2.0 %             |
| 209Bi (KED) | 73.032 %              | 2.1 %             |
| 232Th (KED) | 0.111 ppb             | 0.6 %             |
| 238U (KED)  | 0.037 ppb             | 3.0 %             |

| Category   | Concentration average | Intensity average | Intensity RSD |
|------------|-----------------------|-------------------|---------------|
| 6Li (KED)  | 142.341 %             | 3,591 cps         | 2.1 %         |
| 9Be (KED)  | 0.020 ppb             | 3 cps             | 100.0 %       |
| 11B (KED)  | 229.031 ppb           | 474 cps           | 14.8 %        |
| 24Mg (KED) | 372.199 ppb           | 215,128 cps       | 1.0 %         |
| 27Al (KED) | 391.985 ppb           | 52,297 cps        | 2.4 %         |

| Category    | Concentration average | Intensity average | Intensity RSD |
|-------------|-----------------------|-------------------|---------------|
| 45Sc (KED)  | 127.663 %             | 50,262 cps        | 0.8 %         |
| 51V (KED)   | 0.647 ppb             | 5,916 cps         | 3.7 %         |
| 52Cr (KED)  | 6.862 ppb             | 99,234 cps        | 1.3 %         |
| 55Mn (KED)  | 8.824 ppb             | 65,324 cps        | 2.0 %         |
| 56Fe (KED)  | 452.940 ppb           | 5,482,619 cps     | 0.5 %         |
| 58Ni (KED)  | 1.160 ppb             | 41,407 cps        | 1.1 %         |
| 59Co (KED)  | 0.212 ppb             | 6,107 cps         | 2.8 %         |
| 63Cu (KED)  | -13.635 ppb           | 194,837 cps       | 0.7 %         |
| 64Zn (KED)  | 236.267 ppb           | 787,087 cps       | 1.0 %         |
| 69Ga (KED)  | 1.368 ppb             | 10,580 cps        | 1.1 %         |
| 75As (KED)  | 0.491 ppb             | 736 cps           | 2.9 %         |
| 80Se (KED)  | 0.461 ppb             | 1,256 cps         | 2.9 %         |
| 85Rb (KED)  | 2.125 ppb             | 12,791 cps        | 4.1 %         |
| 88Sr (KED)  | 4.490 ppb             | 36,597 cps        | 1.2 %         |
| 89Y (KED)   | 102.357 %             | 396,629 cps       | 1.3 %         |
| 107Ag (KED) | 0.082 ppb             | 3,791 cps         | 2.4 %         |
| 114Cd (KED) | 0.077 ppb             | 2,895 cps         | 3.3 %         |
| 115In (KED) | 90.146 %              | 702,938 cps       | 1.3 %         |
| 133Cs (KED) | 0.068 ppb             | 2,136 cps         | 2.5 %         |
| 138Ba (KED) | 4.374 ppb             | 238,664 cps       | 0.5 %         |
| 139La (KED) | 0.299 ppb             | 23,768 cps        | 2.1 %         |
| 140Ce (KED) | 0.625 ppb             | 66,754 cps        | 0.8 %         |
| 141Pr (KED) | 0.075 ppb             | 8,550 cps         | 1.7 %         |
| 142Nd (KED) | 0.380 ppb             | 17,614 cps        | 0.9 %         |
| 152Sm (KED) | 0.053 ppb             | 2,324 cps         | 7.1 %         |
| 153Eu (KED) | 0.012 ppb             | 1,023 cps         | 7.8 %         |
| 158Gd (KED) | 0.045 ppb             | 2,747 cps         | 4.2 %         |
| 159Tb (KED) | 91.452 %              | 3,959,917 cps     | 0.5 %         |
| 164Dy (KED) | 0.031 ppb             | 2,164 cps         | 7.9 %         |
| 166Er (KED) | 0.015 ppb             | 1,742 cps         | 3.2 %         |
| 169Tm (KED) | 0.002 ppb             | 582 cps           | 8.6 %         |
| 174Yb (KED) | 0.012 ppb             | 1,309 cps         | 4.7 %         |
| 175Lu (KED) | -0.101 ppb            | 22,143 cps        | 1.8 %         |
| 205Tl (KED) | 0.011 ppb             | 1,852 cps         | 7.1 %         |
| 208Pb (KED) | -3.128 ppb            | 135,856 cps       | 3.2 %         |
| 209Bi (KED) | 73.032 %              | 3,067,233 cps     | 2.1 %         |
| 232Th (KED) | 0.111 ppb             | 24,526 cps        | 1.9 %         |
| 238U (KED)  | 0.037 ppb             | 11,166 cps        | 2.0 %         |

## Sample Summary

Instrument ID: iCAP Q

Analysis index: 14

Analysis name: 178607jian

Analysis started at: 9/3/2021 4:33:38 PM

User name: WINDOWS-UPCI4ER\Administrator

| Category    | Concentration average | Concentration RSD |
|-------------|-----------------------|-------------------|
| 6Li (KED)   | 146.042 %             | 2.2 %             |
| 9Be (KED)   | 0.026 ppb             | 173.2 %           |
| 11B (KED)   | 229.016 ppb           | 0.2 %             |
| 24Mg (KED)  | 451.760 ppb           | 0.9 %             |
| 27Al (KED)  | 351.272 ppb           | 1.6 %             |
| 45Sc (KED)  | 132.263 %             | 1.0 %             |
| 51V (KED)   | 0.586 ppb             | 0.9 %             |
| 52Cr (KED)  | 2.414 ppb             | 13.5 %            |
| 55Mn (KED)  | 8.333 ppb             | 1.1 %             |
| 56Fe (KED)  | 331.274 ppb           | 1.7 %             |
| 58Ni (KED)  | 1.263 ppb             | 6.0 %             |
| 59Co (KED)  | 0.200 ppb             | 2.4 %             |
| 63Cu (KED)  | -5.029 ppb            | 11.0 %            |
| 64Zn (KED)  | 259.907 ppb           | 3.1 %             |
| 69Ga (KED)  | 1.242 ppb             | 1.2 %             |
| 75As (KED)  | 0.218 ppb             | 16.3 %            |
| 80Se (KED)  | 0.783 ppb             | 28.9 %            |
| 85Rb (KED)  | 3.847 ppb             | 2.3 %             |
| 88Sr (KED)  | 8.960 ppb             | 3.9 %             |
| 89Y (KED)   | 105.288 %             | 2.5 %             |
| 107Ag (KED) | 0.460 ppb             | 4.1 %             |
| 114Cd (KED) | 0.047 ppb             | 2.9 %             |
| 115In (KED) | 90.575 %              | 2.2 %             |
| 133Cs (KED) | 0.050 ppb             | 5.1 %             |
| 138Ba (KED) | 4.139 ppb             | 6.1 %             |
| 139La (KED) | 0.284 ppb             | 4.3 %             |
| 140Ce (KED) | 0.581 ppb             | 2.3 %             |
| 141Pr (KED) | 0.066 ppb             | 5.9 %             |
| 142Nd (KED) | 0.356 ppb             | 2.6 %             |
| 152Sm (KED) | 0.044 ppb             | 9.2 %             |
| 153Eu (KED) | 0.009 ppb             | 13.3 %            |
| 158Gd (KED) | 0.040 ppb             | 1.2 %             |
| 159Tb (KED) | 89.063 %              | 1.7 %             |
| 164Dy (KED) | 0.026 ppb             | 6.7 %             |
| 166Er (KED) | 0.012 ppb             | 6.2 %             |
| 169Tm (KED) | 0.002 ppb             | 13.5 %            |
| 174Yb (KED) | 0.017 ppb             | 6.5 %             |
| 175Lu (KED) | -0.099 ppb            | 4.1 %             |
| 205Tl (KED) | 0.007 ppb             | 0.4 %             |
| 208Pb (KED) | -3.323 ppb            | 0.2 %             |
| 209Bi (KED) | 71.725 %              | 2.4 %             |
| 232Th (KED) | 0.089 ppb             | 2.2 %             |
| 238U (KED)  | 0.025 ppb             | 4.9 %             |

| Category   | Concentration average | Intensity average | Intensity RSD |
|------------|-----------------------|-------------------|---------------|
| 6Li (KED)  | 146.042 %             | 3,684 cps         | 2.2 %         |
| 9Be (KED)  | 0.026 ppb             | 4 cps             | 173.2 %       |
| 11B (KED)  | 229.016 ppb           | 488 cps           | 4.8 %         |
| 24Mg (KED) | 451.760 ppb           | 266,543 cps       | 1.7 %         |
| 27Al (KED) | 351.272 ppb           | 48,812 cps        | 1.3 %         |

| Category    | Concentration average | Intensity average | Intensity RSD |
|-------------|-----------------------|-------------------|---------------|
| 45Sc (KED)  | 132.263 %             | 52,073 cps        | 1.0 %         |
| 51V (KED)   | 0.586 ppb             | 5,563 cps         | 1.8 %         |
| 52Cr (KED)  | 2.414 ppb             | 39,196 cps        | 11.4 %        |
| 55Mn (KED)  | 8.333 ppb             | 64,084 cps        | 1.1 %         |
| 56Fe (KED)  | 331.274 ppb           | 4,180,169 cps     | 1.0 %         |
| 58Ni (KED)  | 1.263 ppb             | 44,619 cps        | 3.1 %         |
| 59Co (KED)  | 0.200 ppb             | 6,001 cps         | 2.4 %         |
| 63Cu (KED)  | -5.029 ppb            | 304,476 cps       | 0.5 %         |
| 64Zn (KED)  | 259.907 ppb           | 877,530 cps       | 1.4 %         |
| 69Ga (KED)  | 1.242 ppb             | 10,169 cps        | 3.4 %         |
| 75As (KED)  | 0.218 ppb             | 409 cps           | 12.9 %        |
| 80Se (KED)  | 0.783 ppb             | 1,416 cps         | 4.9 %         |
| 85Rb (KED)  | 3.847 ppb             | 22,731 cps        | 1.4 %         |
| 88Sr (KED)  | 8.960 ppb             | 72,666 cps        | 1.2 %         |
| 89Y (KED)   | 105.288 %             | 407,986 cps       | 2.5 %         |
| 107Ag (KED) | 0.460 ppb             | 20,765 cps        | 2.0 %         |
| 114Cd (KED) | 0.047 ppb             | 2,410 cps         | 2.2 %         |
| 115In (KED) | 90.575 %              | 706,283 cps       | 2.2 %         |
| 133Cs (KED) | 0.050 ppb             | 1,681 cps         | 6.0 %         |
| 138Ba (KED) | 4.139 ppb             | 223,791 cps       | 2.8 %         |
| 139La (KED) | 0.284 ppb             | 22,072 cps        | 2.6 %         |
| 140Ce (KED) | 0.581 ppb             | 60,568 cps        | 0.7 %         |
| 141Pr (KED) | 0.066 ppb             | 7,437 cps         | 6.7 %         |
| 142Nd (KED) | 0.356 ppb             | 16,100 cps        | 2.4 %         |
| 152Sm (KED) | 0.044 ppb             | 1,907 cps         | 9.2 %         |
| 153Eu (KED) | 0.009 ppb             | 822 cps           | 10.3 %        |
| 158Gd (KED) | 0.040 ppb             | 2,365 cps         | 0.5 %         |
| 159Tb (KED) | 89.063 %              | 3,856,469 cps     | 1.7 %         |
| 164Dy (KED) | 0.026 ppb             | 1,746 cps         | 5.2 %         |
| 166Er (KED) | 0.012 ppb             | 1,455 cps         | 4.9 %         |
| 169Tm (KED) | 0.002 ppb             | 454 cps           | 12.1 %        |
| 174Yb (KED) | 0.017 ppb             | 1,678 cps         | 6.4 %         |
| 175Lu (KED) | -0.099 ppb            | 21,821 cps        | 1.5 %         |
| 205Tl (KED) | 0.007 ppb             | 1,252 cps         | 2.4 %         |
| 208Pb (KED) | -3.323 ppb            | 113,598 cps       | 2.4 %         |
| 209Bi (KED) | 71.725 %              | 3,012,320 cps     | 2.4 %         |
| 232Th (KED) | 0.089 ppb             | 19,479 cps        | 0.3 %         |
| 238U (KED)  | 0.025 ppb             | 7,974 cps         | 6.0 %         |

## Sample Summary

Instrument ID: iCAP Q

Analysis index: 15

Analysis name: 178578jian

Analysis started at: 9/3/2021 4:37:06 PM

User name: WINDOWS-UPCI4ER\Administrator

| Category    | Concentration average | Concentration RSD |
|-------------|-----------------------|-------------------|
| 6Li (KED)   | 165.165 %             | 2.1 %             |
| 9Be (KED)   | 0.040 ppb             | 25.7 %            |
| 11B (KED)   | 231.253 ppb           | 0.1 %             |
| 24Mg (KED)  | 329.171 ppb           | 1.0 %             |
| 27Al (KED)  | 319.218 ppb           | 2.6 %             |
| 45Sc (KED)  | 148.261 %             | 2.4 %             |
| 51V (KED)   | 0.500 ppb             | 3.3 %             |
| 52Cr (KED)  | 2.322 ppb             | 1.3 %             |
| 55Mn (KED)  | 6.832 ppb             | 1.8 %             |
| 56Fe (KED)  | 327.993 ppb           | 2.0 %             |
| 58Ni (KED)  | 1.381 ppb             | 4.7 %             |
| 59Co (KED)  | 0.140 ppb             | 4.4 %             |
| 63Cu (KED)  | -11.600 ppb           | 3.6 %             |
| 64Zn (KED)  | 216.558 ppb           | 4.1 %             |
| 69Ga (KED)  | 0.728 ppb             | 10.5 %            |
| 75As (KED)  | 0.232 ppb             | 6.2 %             |
| 80Se (KED)  | 0.721 ppb             | 8.5 %             |
| 85Rb (KED)  | 3.018 ppb             | 1.2 %             |
| 88Sr (KED)  | 5.435 ppb             | 2.1 %             |
| 89Y (KED)   | 110.666 %             | 2.4 %             |
| 107Ag (KED) | 0.579 ppb             | 2.3 %             |
| 114Cd (KED) | 0.094 ppb             | 4.3 %             |
| 115In (KED) | 94.831 %              | 1.0 %             |
| 133Cs (KED) | 0.071 ppb             | 1.4 %             |
| 138Ba (KED) | 2.201 ppb             | 2.3 %             |
| 139La (KED) | 0.246 ppb             | 2.0 %             |
| 140Ce (KED) | 0.506 ppb             | 2.8 %             |
| 141Pr (KED) | 0.059 ppb             | 0.9 %             |
| 142Nd (KED) | 0.313 ppb             | 2.8 %             |
| 152Sm (KED) | 0.043 ppb             | 4.3 %             |
| 153Eu (KED) | 0.009 ppb             | 8.8 %             |
| 158Gd (KED) | 0.040 ppb             | 8.3 %             |
| 159Tb (KED) | 92.568 %              | 1.4 %             |
| 164Dy (KED) | 0.026 ppb             | 4.3 %             |
| 166Er (KED) | 0.011 ppb             | 10.9 %            |
| 169Tm (KED) | 0.002 ppb             | 9.2 %             |
| 174Yb (KED) | 0.010 ppb             | 6.5 %             |
| 175Lu (KED) | -0.096 ppb            | 5.6 %             |
| 205Tl (KED) | 0.008 ppb             | 6.2 %             |
| 208Pb (KED) | -3.556 ppb            | 1.0 %             |
| 209Bi (KED) | 72.159 %              | 3.6 %             |
| 232Th (KED) | 0.100 ppb             | 3.6 %             |
| 238U (KED)  | 0.024 ppb             | 5.6 %             |

| Category   | Concentration average | Intensity average | Intensity RSD |
|------------|-----------------------|-------------------|---------------|
| 6Li (KED)  | 165.165 %             | 4,166 cps         | 2.1 %         |
| 9Be (KED)  | 0.040 ppb             | 8 cps             | 24.7 %        |
| 11B (KED)  | 231.253 ppb           | 413 cps           | 0.8 %         |
| 24Mg (KED) | 329.171 ppb           | 221,707 cps       | 1.5 %         |
| 27Al (KED) | 319.218 ppb           | 49,969 cps        | 1.4 %         |

| Category    | Concentration average | Intensity average | Intensity RSD |
|-------------|-----------------------|-------------------|---------------|
| 45Sc (KED)  | 148.261 %             | 58,372 cps        | 2.4 %         |
| 51V (KED)   | 0.500 ppb             | 5,338 cps         | 4.0 %         |
| 52Cr (KED)  | 2.322 ppb             | 42,484 cps        | 1.8 %         |
| 55Mn (KED)  | 6.832 ppb             | 59,514 cps        | 1.0 %         |
| 56Fe (KED)  | 327.993 ppb           | 4,639,623 cps     | 1.1 %         |
| 58Ni (KED)  | 1.381 ppb             | 52,189 cps        | 1.5 %         |
| 59Co (KED)  | 0.140 ppb             | 4,849 cps         | 1.6 %         |
| 63Cu (KED)  | -11.600 ppb           | 236,487 cps       | 1.1 %         |
| 64Zn (KED)  | 216.558 ppb           | 790,794 cps       | 1.1 %         |
| 69Ga (KED)  | 0.728 ppb             | 7,612 cps         | 5.4 %         |
| 75As (KED)  | 0.232 ppb             | 449 cps           | 6.0 %         |
| 80Se (KED)  | 0.721 ppb             | 1,463 cps         | 3.2 %         |
| 85Rb (KED)  | 3.018 ppb             | 19,046 cps        | 2.1 %         |
| 88Sr (KED)  | 5.435 ppb             | 47,348 cps        | 0.4 %         |
| 89Y (KED)   | 110.666 %             | 428,826 cps       | 2.4 %         |
| 107Ag (KED) | 0.579 ppb             | 27,347 cps        | 2.0 %         |
| 114Cd (KED) | 0.094 ppb             | 3,346 cps         | 2.5 %         |
| 115In (KED) | 94.831 %              | 739,466 cps       | 1.0 %         |
| 133Cs (KED) | 0.071 ppb             | 2,330 cps         | 0.7 %         |
| 138Ba (KED) | 2.201 ppb             | 159,327 cps       | 2.5 %         |
| 139La (KED) | 0.246 ppb             | 20,031 cps        | 0.5 %         |
| 140Ce (KED) | 0.506 ppb             | 55,233 cps        | 1.2 %         |
| 141Pr (KED) | 0.059 ppb             | 6,909 cps         | 0.6 %         |
| 142Nd (KED) | 0.313 ppb             | 14,814 cps        | 1.2 %         |
| 152Sm (KED) | 0.043 ppb             | 1,938 cps         | 2.7 %         |
| 153Eu (KED) | 0.009 ppb             | 792 cps           | 7.2 %         |
| 158Gd (KED) | 0.040 ppb             | 2,450 cps         | 6.5 %         |
| 159Tb (KED) | 92.568 %              | 4,008,235 cps     | 1.4 %         |
| 164Dy (KED) | 0.026 ppb             | 1,833 cps         | 2.6 %         |
| 166Er (KED) | 0.011 ppb             | 1,456 cps         | 8.0 %         |
| 169Tm (KED) | 0.002 ppb             | 501 cps           | 9.0 %         |
| 174Yb (KED) | 0.010 ppb             | 1,110 cps         | 4.8 %         |
| 175Lu (KED) | -0.096 ppb            | 23,220 cps        | 2.5 %         |
| 205Tl (KED) | 0.008 ppb             | 1,402 cps         | 3.8 %         |
| 208Pb (KED) | -3.556 ppb            | 90,415 cps        | 3.1 %         |
| 209Bi (KED) | 72.159 %              | 3,030,534 cps     | 3.6 %         |
| 232Th (KED) | 0.100 ppb             | 21,782 cps        | 0.5 %         |
| 238U (KED)  | 0.024 ppb             | 7,831 cps         | 2.8 %         |

## Sample Summary

Instrument ID: iCAP Q

Analysis index: 16

Analysis name: 00029jian

Analysis started at: 9/3/2021 4:40:34 PM

User name: WINDOWS-UPCI4ER\Administrator

| Category    | Concentration average | Concentration RSD |
|-------------|-----------------------|-------------------|
| 6Li (KED)   | 157.675 %             | 3.1 %             |
| 9Be (KED)   | 0.037 ppb             | 133.8 %           |
| 11B (KED)   | 226.449 ppb           | 0.2 %             |
| 24Mg (KED)  | 441.902 ppb           | 2.9 %             |
| 27Al (KED)  | 534.840 ppb           | 2.0 %             |
| 45Sc (KED)  | 136.806 %             | 0.5 %             |
| 51V (KED)   | 0.839 ppb             | 2.8 %             |
| 52Cr (KED)  | 2.642 ppb             | 0.6 %             |
| 55Mn (KED)  | 12.314 ppb            | 1.1 %             |
| 56Fe (KED)  | 511.561 ppb           | 1.2 %             |
| 58Ni (KED)  | 1.740 ppb             | 3.0 %             |
| 59Co (KED)  | 0.256 ppb             | 1.4 %             |
| 63Cu (KED)  | -8.005 ppb            | 1.5 %             |
| 64Zn (KED)  | 247.587 ppb           | 2.1 %             |
| 69Ga (KED)  | 1.324 ppb             | 2.6 %             |
| 75As (KED)  | 0.527 ppb             | 7.4 %             |
| 80Se (KED)  | 0.770 ppb             | 33.2 %            |
| 85Rb (KED)  | 1.929 ppb             | 4.5 %             |
| 88Sr (KED)  | 6.491 ppb             | 2.4 %             |
| 89Y (KED)   | 107.819 %             | 1.3 %             |
| 107Ag (KED) | 0.131 ppb             | 2.1 %             |
| 114Cd (KED) | 0.028 ppb             | 21.3 %            |
| 115In (KED) | 90.636 %              | 0.4 %             |
| 133Cs (KED) | 0.090 ppb             | 1.8 %             |
| 138Ba (KED) | 4.197 ppb             | 3.0 %             |
| 139La (KED) | 0.414 ppb             | 1.1 %             |
| 140Ce (KED) | 0.879 ppb             | 0.9 %             |
| 141Pr (KED) | 0.087 ppb             | 3.4 %             |
| 142Nd (KED) | 0.509 ppb             | 2.9 %             |
| 152Sm (KED) | 0.065 ppb             | 3.6 %             |
| 153Eu (KED) | 0.014 ppb             | 7.1 %             |
| 158Gd (KED) | 0.060 ppb             | 3.0 %             |
| 159Tb (KED) | 88.987 %              | 1.2 %             |
| 164Dy (KED) | 0.038 ppb             | 1.6 %             |
| 166Er (KED) | 0.016 ppb             | 3.9 %             |
| 169Tm (KED) | 0.002 ppb             | 6.6 %             |
| 174Yb (KED) | 0.016 ppb             | 11.2 %            |
| 175Lu (KED) | -0.103 ppb            | 1.3 %             |
| 205Tl (KED) | 0.015 ppb             | 3.8 %             |
| 208Pb (KED) | -2.918 ppb            | 1.3 %             |
| 209Bi (KED) | 70.609 %              | 1.3 %             |
| 232Th (KED) | 0.133 ppb             | 1.4 %             |
| 238U (KED)  | 0.043 ppb             | 2.3 %             |

| Category   | Concentration average | Intensity average | Intensity RSD |
|------------|-----------------------|-------------------|---------------|
| 6Li (KED)  | 157.675 %             | 3,977 cps         | 3.1 %         |
| 9Be (KED)  | 0.037 ppb             | 7 cps             | 132.3 %       |
| 11B (KED)  | 226.449 ppb           | 678 cps           | 4.8 %         |
| 24Mg (KED) | 441.902 ppb           | 281,541 cps       | 1.8 %         |
| 27Al (KED) | 534.840 ppb           | 75,505 cps        | 1.7 %         |

| Category    | Concentration average | Intensity average | Intensity RSD |
|-------------|-----------------------|-------------------|---------------|
| 45Sc (KED)  | 136.806 %             | 53,862 cps        | 0.5 %         |
| 51V (KED)   | 0.839 ppb             | 8,182 cps         | 2.4 %         |
| 52Cr (KED)  | 2.642 ppb             | 43,942 cps        | 1.0 %         |
| 55Mn (KED)  | 12.314 ppb            | 96,413 cps        | 1.1 %         |
| 56Fe (KED)  | 511.561 ppb           | 6,622,989 cps     | 0.8 %         |
| 58Ni (KED)  | 1.740 ppb             | 54,333 cps        | 1.7 %         |
| 59Co (KED)  | 0.256 ppb             | 7,797 cps         | 0.9 %         |
| 63Cu (KED)  | -8.005 ppb            | 275,019 cps       | 1.0 %         |
| 64Zn (KED)  | 247.587 ppb           | 862,456 cps       | 0.9 %         |
| 69Ga (KED)  | 1.324 ppb             | 10,886 cps        | 0.6 %         |
| 75As (KED)  | 0.527 ppb             | 822 cps           | 5.0 %         |
| 80Se (KED)  | 0.770 ppb             | 1,445 cps         | 5.8 %         |
| 85Rb (KED)  | 1.929 ppb             | 12,349 cps        | 3.0 %         |
| 88Sr (KED)  | 6.491 ppb             | 54,619 cps        | 1.1 %         |
| 89Y (KED)   | 107.819 %             | 417,795 cps       | 1.3 %         |
| 107Ag (KED) | 0.131 ppb             | 6,044 cps         | 2.2 %         |
| 114Cd (KED) | 0.028 ppb             | 2,089 cps         | 4.5 %         |
| 115In (KED) | 90.636 %              | 706,756 cps       | 0.4 %         |
| 133Cs (KED) | 0.090 ppb             | 2,745 cps         | 2.0 %         |
| 138Ba (KED) | 4.197 ppb             | 225,776 cps       | 0.9 %         |
| 139La (KED) | 0.414 ppb             | 31,669 cps        | 1.6 %         |
| 140Ce (KED) | 0.879 ppb             | 90,223 cps        | 0.5 %         |
| 141Pr (KED) | 0.087 ppb             | 9,578 cps         | 2.1 %         |
| 142Nd (KED) | 0.509 ppb             | 22,664 cps        | 2.1 %         |
| 152Sm (KED) | 0.065 ppb             | 2,766 cps         | 3.5 %         |
| 153Eu (KED) | 0.014 ppb             | 1,182 cps         | 5.7 %         |
| 158Gd (KED) | 0.060 ppb             | 3,499 cps         | 3.1 %         |
| 159Tb (KED) | 88.987 %              | 3,853,197 cps     | 1.2 %         |
| 164Dy (KED) | 0.038 ppb             | 2,488 cps         | 2.3 %         |
| 166Er (KED) | 0.016 ppb             | 1,766 cps         | 3.0 %         |
| 169Tm (KED) | 0.002 ppb             | 677 cps           | 4.9 %         |
| 174Yb (KED) | 0.016 ppb             | 1,623 cps         | 10.6 %        |
| 175Lu (KED) | -0.103 ppb            | 21,227 cps        | 1.6 %         |
| 205Tl (KED) | 0.015 ppb             | 2,354 cps         | 3.0 %         |
| 208Pb (KED) | -2.918 ppb            | 152,546 cps       | 2.7 %         |
| 209Bi (KED) | 70.609 %              | 2,965,467 cps     | 1.3 %         |
| 232Th (KED) | 0.133 ppb             | 28,092 cps        | 1.1 %         |
| 238U (KED)  | 0.043 ppb             | 12,119 cps        | 0.7 %         |

## Sample Summary

Instrument ID: iCAP Q

Analysis index: 17

Analysis name: 178588jian

Analysis started at: 9/3/2021 4:44:04 PM

User name: WINDOWS-UPCI4ER\Administrator

| Category    | Concentration average | Concentration RSD |
|-------------|-----------------------|-------------------|
| 6Li (KED)   | 148.950 %             | 6.0 %             |
| 9Be (KED)   | 0.019 ppb             | 6.1 %             |
| 11B (KED)   | 224.335 ppb           | 0.2 %             |
| 24Mg (KED)  | 429.428 ppb           | 6.7 %             |
| 27Al (KED)  | 482.381 ppb           | 3.9 %             |
| 45Sc (KED)  | 135.349 %             | 3.6 %             |
| 51V (KED)   | 0.751 ppb             | 3.8 %             |
| 52Cr (KED)  | 1.821 ppb             | 4.2 %             |
| 55Mn (KED)  | 10.454 ppb            | 4.9 %             |
| 56Fe (KED)  | 543.845 ppb           | 2.6 %             |
| 58Ni (KED)  | 1.417 ppb             | 6.7 %             |
| 59Co (KED)  | 0.221 ppb             | 6.9 %             |
| 63Cu (KED)  | -9.408 ppb            | 4.3 %             |
| 64Zn (KED)  | 242.419 ppb           | 1.4 %             |
| 69Ga (KED)  | 1.103 ppb             | 2.7 %             |
| 75As (KED)  | 0.305 ppb             | 5.9 %             |
| 80Se (KED)  | 1.025 ppb             | 12.0 %            |
| 85Rb (KED)  | 2.017 ppb             | 1.3 %             |
| 88Sr (KED)  | 7.545 ppb             | 0.3 %             |
| 89Y (KED)   | 106.845 %             | 1.5 %             |
| 107Ag (KED) | 0.229 ppb             | 4.6 %             |
| 114Cd (KED) | 0.061 ppb             | 4.1 %             |
| 115In (KED) | 93.354 %              | 1.7 %             |
| 133Cs (KED) | 0.069 ppb             | 7.5 %             |
| 138Ba (KED) | 3.619 ppb             | 2.9 %             |
| 139La (KED) | 0.391 ppb             | 3.6 %             |
| 140Ce (KED) | 0.812 ppb             | 1.9 %             |
| 141Pr (KED) | 0.094 ppb             | 1.9 %             |
| 142Nd (KED) | 0.492 ppb             | 3.6 %             |
| 152Sm (KED) | 0.069 ppb             | 1.0 %             |
| 153Eu (KED) | 0.013 ppb             | 1.3 %             |
| 158Gd (KED) | 0.060 ppb             | 4.7 %             |
| 159Tb (KED) | 91.274 %              | 1.6 %             |
| 164Dy (KED) | 0.039 ppb             | 8.0 %             |
| 166Er (KED) | 0.016 ppb             | 4.5 %             |
| 169Tm (KED) | 0.002 ppb             | 15.0 %            |
| 174Yb (KED) | 0.014 ppb             | 2.7 %             |
| 175Lu (KED) | -0.104 ppb            | 4.6 %             |
| 205Tl (KED) | 0.007 ppb             | 6.1 %             |
| 208Pb (KED) | -3.251 ppb            | 0.6 %             |
| 209Bi (KED) | 74.509 %              | 1.0 %             |
| 232Th (KED) | 0.141 ppb             | 2.0 %             |
| 238U (KED)  | 0.037 ppb             | 3.0 %             |

| Category   | Concentration average | Intensity average | Intensity RSD |
|------------|-----------------------|-------------------|---------------|
| 6Li (KED)  | 148.950 %             | 3,757 cps         | 6.0 %         |
| 9Be (KED)  | 0.019 ppb             | 3 cps             | 0.0 %         |
| 11B (KED)  | 224.335 ppb           | 759 cps           | 8.4 %         |
| 24Mg (KED) | 429.428 ppb           | 258,112 cps       | 0.9 %         |
| 27Al (KED) | 482.381 ppb           | 67,574 cps        | 1.2 %         |

| Category    | Concentration average | Intensity average | Intensity RSD |
|-------------|-----------------------|-------------------|---------------|
| 45Sc (KED)  | 135.349 %             | 53,288 cps        | 3.6 %         |
| 51V (KED)   | 0.751 ppb             | 7,257 cps         | 2.6 %         |
| 52Cr (KED)  | 1.821 ppb             | 31,428 cps        | 0.8 %         |
| 55Mn (KED)  | 10.454 ppb            | 81,364 cps        | 1.2 %         |
| 56Fe (KED)  | 543.845 ppb           | 6,955,790 cps     | 1.2 %         |
| 58Ni (KED)  | 1.417 ppb             | 48,225 cps        | 0.2 %         |
| 59Co (KED)  | 0.221 ppb             | 6,722 cps         | 3.6 %         |
| 63Cu (KED)  | -9.408 ppb            | 255,270 cps       | 1.1 %         |
| 64Zn (KED)  | 242.419 ppb           | 839,537 cps       | 0.3 %         |
| 69Ga (KED)  | 1.103 ppb             | 9,516 cps         | 1.1 %         |
| 75As (KED)  | 0.305 ppb             | 528 cps           | 5.9 %         |
| 80Se (KED)  | 1.025 ppb             | 1,532 cps         | 1.8 %         |
| 85Rb (KED)  | 2.017 ppb             | 12,734 cps        | 1.7 %         |
| 88Sr (KED)  | 7.545 ppb             | 62,528 cps        | 1.8 %         |
| 89Y (KED)   | 106.845 %             | 414,018 cps       | 1.5 %         |
| 107Ag (KED) | 0.229 ppb             | 10,710 cps        | 2.7 %         |
| 114Cd (KED) | 0.061 ppb             | 2,718 cps         | 1.1 %         |
| 115In (KED) | 93.354 %              | 727,953 cps       | 1.7 %         |
| 133Cs (KED) | 0.069 ppb             | 2,237 cps         | 4.5 %         |
| 138Ba (KED) | 3.619 ppb             | 210,004 cps       | 1.7 %         |
| 139La (KED) | 0.391 ppb             | 30,759 cps        | 1.9 %         |
| 140Ce (KED) | 0.812 ppb             | 85,708 cps        | 1.1 %         |
| 141Pr (KED) | 0.094 ppb             | 10,598 cps        | 1.7 %         |
| 142Nd (KED) | 0.492 ppb             | 22,497 cps        | 2.0 %         |
| 152Sm (KED) | 0.069 ppb             | 3,017 cps         | 2.6 %         |
| 153Eu (KED) | 0.013 ppb             | 1,114 cps         | 2.8 %         |
| 158Gd (KED) | 0.060 ppb             | 3,574 cps         | 3.0 %         |
| 159Tb (KED) | 91.274 %              | 3,952,203 cps     | 1.6 %         |
| 164Dy (KED) | 0.039 ppb             | 2,670 cps         | 9.2 %         |
| 166Er (KED) | 0.016 ppb             | 1,835 cps         | 4.5 %         |
| 169Tm (KED) | 0.002 ppb             | 692 cps           | 15.2 %        |
| 174Yb (KED) | 0.014 ppb             | 1,458 cps         | 2.6 %         |
| 175Lu (KED) | -0.104 ppb            | 21,628 cps        | 2.9 %         |
| 205Tl (KED) | 0.007 ppb             | 1,228 cps         | 4.8 %         |
| 208Pb (KED) | -3.251 ppb            | 125,633 cps       | 2.1 %         |
| 209Bi (KED) | 74.509 %              | 3,129,239 cps     | 1.0 %         |
| 232Th (KED) | 0.141 ppb             | 31,485 cps        | 1.2 %         |
| 238U (KED)  | 0.037 ppb             | 11,268 cps        | 2.5 %         |

## Sample Summary

Instrument ID: iCAP Q

Analysis index: 18

Analysis name: 00025jian

Analysis started at: 9/3/2021 4:47:23 PM

User name: WINDOWS-UPCI4ER\Administrator

| Category    | Concentration average | Concentration RSD |
|-------------|-----------------------|-------------------|
| 6Li (KED)   | 147.055 %             | 0.5 %             |
| 9Be (KED)   | 0.032 ppb             | 34.7 %            |
| 11B (KED)   | 225.688 ppb           | 0.9 %             |
| 24Mg (KED)  | 381.851 ppb           | 0.4 %             |
| 27Al (KED)  | 483.820 ppb           | 1.7 %             |
| 45Sc (KED)  | 132.962 %             | 2.0 %             |
| 51V (KED)   | 0.727 ppb             | 5.1 %             |
| 52Cr (KED)  | 1.990 ppb             | 1.1 %             |
| 55Mn (KED)  | 9.278 ppb             | 3.5 %             |
| 56Fe (KED)  | 469.086 ppb           | 1.2 %             |
| 58Ni (KED)  | 1.206 ppb             | 6.8 %             |
| 59Co (KED)  | 0.218 ppb             | 0.4 %             |
| 63Cu (KED)  | -9.464 ppb            | 2.0 %             |
| 64Zn (KED)  | 217.479 ppb           | 2.0 %             |
| 69Ga (KED)  | 1.794 ppb             | 3.7 %             |
| 75As (KED)  | 0.426 ppb             | 1.8 %             |
| 80Se (KED)  | 0.727 ppb             | 24.0 %            |
| 85Rb (KED)  | 1.693 ppb             | 0.4 %             |
| 88Sr (KED)  | 4.611 ppb             | 3.8 %             |
| 89Y (KED)   | 105.658 %             | 1.4 %             |
| 107Ag (KED) | 0.082 ppb             | 1.4 %             |
| 114Cd (KED) | -0.006 ppb            | 20.5 %            |
| 115In (KED) | 94.145 %              | 0.3 %             |
| 133Cs (KED) | 0.076 ppb             | 6.7 %             |
| 138Ba (KED) | 6.262 ppb             | 2.5 %             |
| 139La (KED) | 0.317 ppb             | 3.0 %             |
| 140Ce (KED) | 0.662 ppb             | 1.0 %             |
| 141Pr (KED) | 0.073 ppb             | 2.0 %             |
| 142Nd (KED) | 0.396 ppb             | 1.0 %             |
| 152Sm (KED) | 0.055 ppb             | 6.7 %             |
| 153Eu (KED) | 0.012 ppb             | 7.5 %             |
| 158Gd (KED) | 0.046 ppb             | 1.7 %             |
| 159Tb (KED) | 92.403 %              | 1.2 %             |
| 164Dy (KED) | 0.032 ppb             | 2.5 %             |
| 166Er (KED) | 0.013 ppb             | 5.7 %             |
| 169Tm (KED) | 0.002 ppb             | 5.4 %             |
| 174Yb (KED) | 0.014 ppb             | 1.9 %             |
| 175Lu (KED) | -0.108 ppb            | 2.8 %             |
| 205Tl (KED) | 0.009 ppb             | 5.7 %             |
| 208Pb (KED) | -3.243 ppb            | 1.8 %             |
| 209Bi (KED) | 75.280 %              | 1.4 %             |
| 232Th (KED) | 0.116 ppb             | 3.5 %             |
| 238U (KED)  | 0.038 ppb             | 0.5 %             |

| Category   | Concentration average | Intensity average | Intensity RSD |
|------------|-----------------------|-------------------|---------------|
| 6Li (KED)  | 147.055 %             | 3,709 cps         | 0.5 %         |
| 9Be (KED)  | 0.032 ppb             | 6 cps             | 34.6 %        |
| 11B (KED)  | 225.688 ppb           | 674 cps           | 16.4 %        |
| 24Mg (KED) | 381.851 ppb           | 227,931 cps       | 0.9 %         |
| 27Al (KED) | 483.820 ppb           | 66,613 cps        | 0.4 %         |

| Category    | Concentration average | Intensity average | Intensity RSD |
|-------------|-----------------------|-------------------|---------------|
| 45Sc (KED)  | 132.962 %             | 52,348 cps        | 2.0 %         |
| 51V (KED)   | 0.727 ppb             | 6,902 cps         | 3.5 %         |
| 52Cr (KED)  | 1.990 ppb             | 33,330 cps        | 1.3 %         |
| 55Mn (KED)  | 9.278 ppb             | 71,342 cps        | 1.3 %         |
| 56Fe (KED)  | 469.086 ppb           | 5,909,790 cps     | 1.0 %         |
| 58Ni (KED)  | 1.206 ppb             | 43,891 cps        | 1.6 %         |
| 59Co (KED)  | 0.218 ppb             | 6,532 cps         | 1.7 %         |
| 63Cu (KED)  | -9.464 ppb            | 251,773 cps       | 0.5 %         |
| 64Zn (KED)  | 217.479 ppb           | 757,974 cps       | 0.4 %         |
| 69Ga (KED)  | 1.794 ppb             | 13,350 cps        | 1.5 %         |
| 75As (KED)  | 0.426 ppb             | 677 cps           | 1.8 %         |
| 80Se (KED)  | 0.727 ppb             | 1,399 cps         | 3.7 %         |
| 85Rb (KED)  | 1.693 ppb             | 10,787 cps        | 1.5 %         |
| 88Sr (KED)  | 4.611 ppb             | 38,717 cps        | 2.5 %         |
| 89Y (KED)   | 105.658 %             | 409,419 cps       | 1.4 %         |
| 107Ag (KED) | 0.082 ppb             | 4,000 cps         | 1.4 %         |
| 114Cd (KED) | -0.006 ppb            | 1,568 cps         | 1.2 %         |
| 115In (KED) | 94.145 %              | 734,121 cps       | 0.3 %         |
| 133Cs (KED) | 0.076 ppb             | 2,462 cps         | 6.0 %         |
| 138Ba (KED) | 6.262 ppb             | 312,500 cps       | 1.1 %         |
| 139La (KED) | 0.317 ppb             | 25,403 cps        | 1.8 %         |
| 140Ce (KED) | 0.662 ppb             | 71,295 cps        | 1.2 %         |
| 141Pr (KED) | 0.073 ppb             | 8,423 cps         | 2.1 %         |
| 142Nd (KED) | 0.396 ppb             | 18,500 cps        | 1.2 %         |
| 152Sm (KED) | 0.055 ppb             | 2,431 cps         | 5.2 %         |
| 153Eu (KED) | 0.012 ppb             | 1,040 cps         | 6.2 %         |
| 158Gd (KED) | 0.046 ppb             | 2,836 cps         | 1.1 %         |
| 159Tb (KED) | 92.403 %              | 4,001,116 cps     | 1.2 %         |
| 164Dy (KED) | 0.032 ppb             | 2,234 cps         | 1.7 %         |
| 166Er (KED) | 0.013 ppb             | 1,602 cps         | 4.8 %         |
| 169Tm (KED) | 0.002 ppb             | 627 cps           | 5.4 %         |
| 174Yb (KED) | 0.014 ppb             | 1,442 cps         | 0.5 %         |
| 175Lu (KED) | -0.108 ppb            | 21,311 cps        | 1.0 %         |
| 205Tl (KED) | 0.009 ppb             | 1,587 cps         | 3.8 %         |
| 208Pb (KED) | -3.243 ppb            | 127,772 cps       | 4.3 %         |
| 209Bi (KED) | 75.280 %              | 3,161,630 cps     | 1.4 %         |
| 232Th (KED) | 0.116 ppb             | 26,242 cps        | 2.1 %         |
| 238U (KED)  | 0.038 ppb             | 11,701 cps        | 1.1 %         |

## Sample Summary

Instrument ID: iCAP Q

Analysis index: 19

Analysis name: 178606jian

Analysis started at: 9/3/2021 4:50:50 PM

User name: WINDOWS-UPCI4ER\Administrator

| Category    | Concentration average | Concentration RSD |
|-------------|-----------------------|-------------------|
| 6Li (KED)   | 144.896 %             | 5.1 %             |
| 9Be (KED)   | 0.020 ppb             | 97.7 %            |
| 11B (KED)   | 229.074 ppb           | 0.5 %             |
| 24Mg (KED)  | 406.685 ppb           | 6.5 %             |
| 27Al (KED)  | 387.194 ppb           | 3.3 %             |
| 45Sc (KED)  | 131.849 %             | 2.4 %             |
| 51V (KED)   | 0.644 ppb             | 4.7 %             |
| 52Cr (KED)  | 1.624 ppb             | 3.1 %             |
| 55Mn (KED)  | 8.827 ppb             | 4.0 %             |
| 56Fe (KED)  | 388.158 ppb           | 2.3 %             |
| 58Ni (KED)  | 0.988 ppb             | 1.8 %             |
| 59Co (KED)  | 0.214 ppb             | 1.7 %             |
| 63Cu (KED)  | -10.544 ppb           | 1.0 %             |
| 64Zn (KED)  | 215.656 ppb           | 2.2 %             |
| 69Ga (KED)  | 0.871 ppb             | 0.5 %             |
| 75As (KED)  | 0.227 ppb             | 9.5 %             |
| 80Se (KED)  | 0.631 ppb             | 54.2 %            |
| 85Rb (KED)  | 2.751 ppb             | 1.3 %             |
| 88Sr (KED)  | 6.606 ppb             | 3.8 %             |
| 89Y (KED)   | 105.363 %             | 0.7 %             |
| 107Ag (KED) | 0.274 ppb             | 1.3 %             |
| 114Cd (KED) | 0.020 ppb             | 13.1 %            |
| 115In (KED) | 93.032 %              | 1.4 %             |
| 133Cs (KED) | 0.062 ppb             | 1.2 %             |
| 138Ba (KED) | 2.964 ppb             | 0.7 %             |
| 139La (KED) | 0.297 ppb             | 2.5 %             |
| 140Ce (KED) | 0.601 ppb             | 3.1 %             |
| 141Pr (KED) | 0.069 ppb             | 4.2 %             |
| 142Nd (KED) | 0.367 ppb             | 1.8 %             |
| 152Sm (KED) | 0.051 ppb             | 7.0 %             |
| 153Eu (KED) | 0.011 ppb             | 7.1 %             |
| 158Gd (KED) | 0.045 ppb             | 2.6 %             |
| 159Tb (KED) | 90.366 %              | 1.3 %             |
| 164Dy (KED) | 0.031 ppb             | 2.0 %             |
| 166Er (KED) | 0.014 ppb             | 9.8 %             |
| 169Tm (KED) | 0.002 ppb             | 7.0 %             |
| 174Yb (KED) | 0.015 ppb             | 3.1 %             |
| 175Lu (KED) | -0.105 ppb            | 6.3 %             |
| 205Tl (KED) | 0.007 ppb             | 6.1 %             |
| 208Pb (KED) | -3.458 ppb            | 0.6 %             |
| 209Bi (KED) | 72.630 %              | 1.0 %             |
| 232Th (KED) | 0.117 ppb             | 1.1 %             |
| 238U (KED)  | 0.030 ppb             | 2.0 %             |

| Category   | Concentration average | Intensity average | Intensity RSD |
|------------|-----------------------|-------------------|---------------|
| 6Li (KED)  | 144.896 %             | 3,655 cps         | 5.1 %         |
| 9Be (KED)  | 0.020 ppb             | 3 cps             | 100.0 %       |
| 11B (KED)  | 229.074 ppb           | 479 cps           | 8.1 %         |
| 24Mg (KED) | 406.685 ppb           | 238,250 cps       | 1.6 %         |
| 27Al (KED) | 387.194 ppb           | 53,355 cps        | 1.3 %         |

| Category    | Concentration average | Intensity average | Intensity RSD |
|-------------|-----------------------|-------------------|---------------|
| 45Sc (KED)  | 131.849 %             | 51,910 cps        | 2.4 %         |
| 51V (KED)   | 0.644 ppb             | 6,078 cps         | 2.4 %         |
| 52Cr (KED)  | 1.624 ppb             | 27,829 cps        | 2.4 %         |
| 55Mn (KED)  | 8.827 ppb             | 67,450 cps        | 1.5 %         |
| 56Fe (KED)  | 388.158 ppb           | 4,864,975 cps     | 0.9 %         |
| 58Ni (KED)  | 0.988 ppb             | 39,936 cps        | 1.7 %         |
| 59Co (KED)  | 0.214 ppb             | 6,362 cps         | 0.8 %         |
| 63Cu (KED)  | -10.544 ppb           | 238,004 cps       | 0.6 %         |
| 64Zn (KED)  | 215.656 ppb           | 750,658 cps       | 1.4 %         |
| 69Ga (KED)  | 0.871 ppb             | 8,062 cps         | 0.6 %         |
| 75As (KED)  | 0.227 ppb             | 420 cps           | 6.0 %         |
| 80Se (KED)  | 0.631 ppb             | 1,359 cps         | 10.5 %        |
| 85Rb (KED)  | 2.751 ppb             | 16,646 cps        | 1.0 %         |
| 88Sr (KED)  | 6.606 ppb             | 54,279 cps        | 3.3 %         |
| 89Y (KED)   | 105.363 %             | 408,276 cps       | 0.7 %         |
| 107Ag (KED) | 0.274 ppb             | 12,760 cps        | 0.8 %         |
| 114Cd (KED) | 0.020 ppb             | 1,996 cps         | 3.4 %         |
| 115In (KED) | 93.032 %              | 725,439 cps       | 1.4 %         |
| 133Cs (KED) | 0.062 ppb             | 2,066 cps         | 2.3 %         |
| 138Ba (KED) | 2.964 ppb             | 183,729 cps       | 0.8 %         |
| 139La (KED) | 0.297 ppb             | 23,350 cps        | 1.1 %         |
| 140Ce (KED) | 0.601 ppb             | 63,559 cps        | 1.7 %         |
| 141Pr (KED) | 0.069 ppb             | 7,874 cps         | 2.8 %         |
| 142Nd (KED) | 0.367 ppb             | 16,848 cps        | 0.8 %         |
| 152Sm (KED) | 0.051 ppb             | 2,217 cps         | 6.8 %         |
| 153Eu (KED) | 0.011 ppb             | 932 cps           | 7.3 %         |
| 158Gd (KED) | 0.045 ppb             | 2,669 cps         | 1.4 %         |
| 159Tb (KED) | 90.366 %              | 3,912,897 cps     | 1.3 %         |
| 164Dy (KED) | 0.031 ppb             | 2,117 cps         | 1.3 %         |
| 166Er (KED) | 0.014 ppb             | 1,652 cps         | 7.5 %         |
| 169Tm (KED) | 0.002 ppb             | 583 cps           | 5.1 %         |
| 174Yb (KED) | 0.015 ppb             | 1,573 cps         | 1.7 %         |
| 175Lu (KED) | -0.105 ppb            | 21,211 cps        | 3.6 %         |
| 205Tl (KED) | 0.007 ppb             | 1,248 cps         | 6.5 %         |
| 208Pb (KED) | -3.458 ppb            | 101,148 cps       | 1.1 %         |
| 209Bi (KED) | 72.630 %              | 3,050,330 cps     | 1.0 %         |
| 232Th (KED) | 0.117 ppb             | 25,640 cps        | 0.8 %         |
| 238U (KED)  | 0.030 ppb             | 9,347 cps         | 0.6 %         |

## Sample Summary

Instrument ID: iCAP Q

Analysis index: 20

Analysis name: 00027jian

Analysis started at: 9/3/2021 4:54:21 PM

User name: WINDOWS-UPCI4ER\Administrator

| Category    | Concentration average | Concentration RSD |
|-------------|-----------------------|-------------------|
| 6Li (KED)   | 150.052 %             | 3.1 %             |
| 9Be (KED)   | 0.032 ppb             | 92.7 %            |
| 11B (KED)   | 223.251 ppb           | 0.6 %             |
| 24Mg (KED)  | 891.440 ppb           | 1.5 %             |
| 27Al (KED)  | 964.177 ppb           | 2.8 %             |
| 45Sc (KED)  | 135.983 %             | 0.8 %             |
| 51V (KED)   | 1.403 ppb             | 1.8 %             |
| 52Cr (KED)  | 3.226 ppb             | 1.1 %             |
| 55Mn (KED)  | 18.566 ppb            | 2.7 %             |
| 56Fe (KED)  | 830.192 ppb           | 1.2 %             |
| 58Ni (KED)  | 2.647 ppb             | 3.4 %             |
| 59Co (KED)  | 0.387 ppb             | 2.1 %             |
| 63Cu (KED)  | -12.075 ppb           | 1.6 %             |
| 64Zn (KED)  | 233.234 ppb           | 2.9 %             |
| 69Ga (KED)  | 2.002 ppb             | 8.4 %             |
| 75As (KED)  | 0.783 ppb             | 5.0 %             |
| 80Se (KED)  | 0.881 ppb             | 12.5 %            |
| 85Rb (KED)  | 2.945 ppb             | 2.3 %             |
| 88Sr (KED)  | 11.056 ppb            | 2.0 %             |
| 89Y (KED)   | 106.242 %             | 1.0 %             |
| 107Ag (KED) | 0.117 ppb             | 4.1 %             |
| 114Cd (KED) | 0.031 ppb             | 4.1 %             |
| 115In (KED) | 90.775 %              | 0.4 %             |
| 133Cs (KED) | 0.167 ppb             | 1.9 %             |
| 138Ba (KED) | 6.582 ppb             | 4.3 %             |
| 139La (KED) | 0.747 ppb             | 3.6 %             |
| 140Ce (KED) | 1.521 ppb             | 4.3 %             |
| 141Pr (KED) | 0.171 ppb             | 3.9 %             |
| 142Nd (KED) | 0.945 ppb             | 2.9 %             |
| 152Sm (KED) | 0.120 ppb             | 4.5 %             |
| 153Eu (KED) | 0.023 ppb             | 2.5 %             |
| 158Gd (KED) | 0.106 ppb             | 5.3 %             |
| 159Tb (KED) | 90.615 %              | 2.2 %             |
| 164Dy (KED) | 0.070 ppb             | 3.3 %             |
| 166Er (KED) | 0.032 ppb             | 6.5 %             |
| 169Tm (KED) | 0.005 ppb             | 3.7 %             |
| 174Yb (KED) | 0.027 ppb             | 1.4 %             |
| 175Lu (KED) | -0.102 ppb            | 1.2 %             |
| 205Tl (KED) | 0.018 ppb             | 5.9 %             |
| 208Pb (KED) | -2.365 ppb            | 0.6 %             |
| 209Bi (KED) | 71.006 %              | 2.7 %             |
| 232Th (KED) | 0.271 ppb             | 1.2 %             |
| 238U (KED)  | 0.088 ppb             | 3.7 %             |

| Category   | Concentration average | Intensity average | Intensity RSD |
|------------|-----------------------|-------------------|---------------|
| 6Li (KED)  | 150.052 %             | 3,785 cps         | 3.1 %         |
| 9Be (KED)  | 0.032 ppb             | 6 cps             | 91.7 %        |
| 11B (KED)  | 223.251 ppb           | 824 cps           | 9.9 %         |
| 24Mg (KED) | 891.440 ppb           | 533,567 cps       | 1.9 %         |
| 27Al (KED) | 964.177 ppb           | 133,201 cps       | 2.5 %         |

| Category    | Concentration average | Intensity average | Intensity RSD |
|-------------|-----------------------|-------------------|---------------|
| 45Sc (KED)  | 135.983 %             | 53,538 cps        | 0.8 %         |
| 51V (KED)   | 1.403 ppb             | 13,521 cps        | 2.6 %         |
| 52Cr (KED)  | 3.226 ppb             | 52,258 cps        | 0.4 %         |
| 55Mn (KED)  | 18.566 ppb            | 142,857 cps       | 2.8 %         |
| 56Fe (KED)  | 830.192 ppb           | 10,622,078 cps    | 1.3 %         |
| 58Ni (KED)  | 2.647 ppb             | 69,461 cps        | 2.9 %         |
| 59Co (KED)  | 0.387 ppb             | 11,471 cps        | 2.2 %         |
| 63Cu (KED)  | -12.075 ppb           | 221,281 cps       | 0.0 %         |
| 64Zn (KED)  | 233.234 ppb           | 808,014 cps       | 1.4 %         |
| 69Ga (KED)  | 2.002 ppb             | 14,613 cps        | 5.6 %         |
| 75As (KED)  | 0.783 ppb             | 1,140 cps         | 4.1 %         |
| 80Se (KED)  | 0.881 ppb             | 1,468 cps         | 3.9 %         |
| 85Rb (KED)  | 2.945 ppb             | 17,874 cps        | 1.2 %         |
| 88Sr (KED)  | 11.056 ppb            | 89,952 cps        | 1.0 %         |
| 89Y (KED)   | 106.242 %             | 411,681 cps       | 1.0 %         |
| 107Ag (KED) | 0.117 ppb             | 5,402 cps         | 3.6 %         |
| 114Cd (KED) | 0.031 ppb             | 2,139 cps         | 1.3 %         |
| 115In (KED) | 90.775 %              | 707,842 cps       | 0.4 %         |
| 133Cs (KED) | 0.167 ppb             | 4,815 cps         | 1.4 %         |
| 138Ba (KED) | 6.582 ppb             | 318,205 cps       | 1.1 %         |
| 139La (KED) | 0.747 ppb             | 57,311 cps        | 1.4 %         |
| 140Ce (KED) | 1.521 ppb             | 156,767 cps       | 2.1 %         |
| 141Pr (KED) | 0.171 ppb             | 18,783 cps        | 2.9 %         |
| 142Nd (KED) | 0.945 ppb             | 42,073 cps        | 0.9 %         |
| 152Sm (KED) | 0.120 ppb             | 5,079 cps         | 3.3 %         |
| 153Eu (KED) | 0.023 ppb             | 1,952 cps         | 1.0 %         |
| 158Gd (KED) | 0.106 ppb             | 6,178 cps         | 3.0 %         |
| 159Tb (KED) | 90.615 %              | 3,923,686 cps     | 2.2 %         |
| 164Dy (KED) | 0.070 ppb             | 4,591 cps         | 4.0 %         |
| 166Er (KED) | 0.032 ppb             | 3,084 cps         | 5.0 %         |
| 169Tm (KED) | 0.005 ppb             | 1,253 cps         | 3.7 %         |
| 174Yb (KED) | 0.027 ppb             | 2,694 cps         | 1.1 %         |
| 175Lu (KED) | -0.102 ppb            | 21,833 cps        | 2.8 %         |
| 205Tl (KED) | 0.018 ppb             | 2,894 cps         | 4.8 %         |
| 208Pb (KED) | -2.365 ppb            | 209,158 cps       | 3.4 %         |
| 209Bi (KED) | 71.006 %              | 2,982,123 cps     | 2.7 %         |
| 232Th (KED) | 0.271 ppb             | 56,857 cps        | 2.0 %         |
| 238U (KED)  | 0.088 ppb             | 23,147 cps        | 0.8 %         |

## Sample Summary

Instrument ID: iCAP Q

Analysis index: 21

Analysis name: 179338jian

Analysis started at: 9/3/2021 4:57:41 PM

User name: WINDOWS-UPCI4ER\Administrator

| Category    | Concentration average | Concentration RSD |
|-------------|-----------------------|-------------------|
| 6Li (KED)   | 148.950 %             | 4.1 %             |
| 9Be (KED)   | 0.025 ppb             | 112.1 %           |
| 11B (KED)   | 229.916 ppb           | 0.1 %             |
| 24Mg (KED)  | 447.767 ppb           | 4.0 %             |
| 27Al (KED)  | 482.367 ppb           | 2.1 %             |
| 45Sc (KED)  | 133.730 %             | 0.2 %             |
| 51V (KED)   | 0.740 ppb             | 1.2 %             |
| 52Cr (KED)  | 1.325 ppb             | 0.6 %             |
| 55Mn (KED)  | 10.485 ppb            | 1.2 %             |
| 56Fe (KED)  | 428.043 ppb           | 0.3 %             |
| 58Ni (KED)  | 0.909 ppb             | 5.2 %             |
| 59Co (KED)  | 0.231 ppb             | 2.1 %             |
| 63Cu (KED)  | -11.675 ppb           | 3.1 %             |
| 64Zn (KED)  | 243.599 ppb           | 2.1 %             |
| 69Ga (KED)  | 1.030 ppb             | 0.6 %             |
| 75As (KED)  | 0.178 ppb             | 7.1 %             |
| 80Se (KED)  | 0.357 ppb             | 45.5 %            |
| 85Rb (KED)  | 2.050 ppb             | 0.7 %             |
| 88Sr (KED)  | 8.408 ppb             | 2.6 %             |
| 89Y (KED)   | 107.737 %             | 1.4 %             |
| 107Ag (KED) | 0.060 ppb             | 1.2 %             |
| 114Cd (KED) | -0.025 ppb            | 5.0 %             |
| 115In (KED) | 94.353 %              | 0.9 %             |
| 133Cs (KED) | 0.068 ppb             | 2.8 %             |
| 138Ba (KED) | 3.510 ppb             | 3.4 %             |
| 139La (KED) | 0.368 ppb             | 2.2 %             |
| 140Ce (KED) | 0.757 ppb             | 1.5 %             |
| 141Pr (KED) | 0.084 ppb             | 1.9 %             |
| 142Nd (KED) | 0.446 ppb             | 3.8 %             |
| 152Sm (KED) | 0.060 ppb             | 7.5 %             |
| 153Eu (KED) | 0.013 ppb             | 3.1 %             |
| 158Gd (KED) | 0.052 ppb             | 6.2 %             |
| 159Tb (KED) | 91.547 %              | 1.8 %             |
| 164Dy (KED) | 0.036 ppb             | 3.8 %             |
| 166Er (KED) | 0.015 ppb             | 7.2 %             |
| 169Tm (KED) | 0.002 ppb             | 19.2 %            |
| 174Yb (KED) | 0.013 ppb             | 3.2 %             |
| 175Lu (KED) | -0.104 ppb            | 2.9 %             |
| 205Tl (KED) | 0.008 ppb             | 2.9 %             |
| 208Pb (KED) | -3.387 ppb            | 0.6 %             |
| 209Bi (KED) | 73.105 %              | 1.1 %             |
| 232Th (KED) | 0.127 ppb             | 1.5 %             |
| 238U (KED)  | 0.038 ppb             | 1.0 %             |

| Category   | Concentration average | Intensity average | Intensity RSD |
|------------|-----------------------|-------------------|---------------|
| 6Li (KED)  | 148.950 %             | 3,757 cps         | 4.1 %         |
| 9Be (KED)  | 0.025 ppb             | 4 cps             | 114.6 %       |
| 11B (KED)  | 229.916 ppb           | 448 cps           | 7.6 %         |
| 24Mg (KED) | 447.767 ppb           | 269,261 cps       | 1.2 %         |
| 27Al (KED) | 482.367 ppb           | 66,818 cps        | 1.9 %         |

| Category    | Concentration average | Intensity average | Intensity RSD |
|-------------|-----------------------|-------------------|---------------|
| 45Sc (KED)  | 133.730 %             | 52,651 cps        | 0.2 %         |
| 51V (KED)   | 0.740 ppb             | 7,074 cps         | 1.4 %         |
| 52Cr (KED)  | 1.325 ppb             | 23,916 cps        | 0.4 %         |
| 55Mn (KED)  | 10.485 ppb            | 80,711 cps        | 1.0 %         |
| 56Fe (KED)  | 428.043 ppb           | 5,433,200 cps     | 0.4 %         |
| 58Ni (KED)  | 0.909 ppb             | 39,183 cps        | 1.8 %         |
| 59Co (KED)  | 0.231 ppb             | 6,922 cps         | 1.9 %         |
| 63Cu (KED)  | -11.675 ppb           | 229,325 cps       | 0.7 %         |
| 64Zn (KED)  | 243.599 ppb           | 850,002 cps       | 0.5 %         |
| 69Ga (KED)  | 1.030 ppb             | 9,172 cps         | 1.0 %         |
| 75As (KED)  | 0.178 ppb             | 366 cps           | 5.9 %         |
| 80Se (KED)  | 0.357 ppb             | 1,280 cps         | 5.4 %         |
| 85Rb (KED)  | 2.050 ppb             | 13,032 cps        | 1.4 %         |
| 88Sr (KED)  | 8.408 ppb             | 69,960 cps        | 1.6 %         |
| 89Y (KED)   | 107.737 %             | 417,477 cps       | 1.4 %         |
| 107Ag (KED) | 0.060 ppb             | 2,956 cps         | 1.9 %         |
| 114Cd (KED) | -0.025 ppb            | 1,231 cps         | 1.1 %         |
| 115In (KED) | 94.353 %              | 735,741 cps       | 0.9 %         |
| 133Cs (KED) | 0.068 ppb             | 2,246 cps         | 2.4 %         |
| 138Ba (KED) | 3.510 ppb             | 206,509 cps       | 1.1 %         |
| 139La (KED) | 0.368 ppb             | 29,048 cps        | 0.3 %         |
| 140Ce (KED) | 0.757 ppb             | 80,333 cps        | 2.0 %         |
| 141Pr (KED) | 0.084 ppb             | 9,570 cps         | 0.9 %         |
| 142Nd (KED) | 0.446 ppb             | 20,529 cps        | 2.9 %         |
| 152Sm (KED) | 0.060 ppb             | 2,641 cps         | 5.6 %         |
| 153Eu (KED) | 0.013 ppb             | 1,106 cps         | 2.3 %         |
| 158Gd (KED) | 0.052 ppb             | 3,130 cps         | 4.7 %         |
| 159Tb (KED) | 91.547 %              | 3,964,017 cps     | 1.8 %         |
| 164Dy (KED) | 0.036 ppb             | 2,455 cps         | 2.0 %         |
| 166Er (KED) | 0.015 ppb             | 1,759 cps         | 3.6 %         |
| 169Tm (KED) | 0.002 ppb             | 627 cps           | 15.7 %        |
| 174Yb (KED) | 0.013 ppb             | 1,378 cps         | 4.6 %         |
| 175Lu (KED) | -0.104 ppb            | 21,640 cps        | 1.2 %         |
| 205Tl (KED) | 0.008 ppb             | 1,286 cps         | 1.7 %         |
| 208Pb (KED) | -3.387 ppb            | 109,213 cps       | 1.7 %         |
| 209Bi (KED) | 73.105 %              | 3,070,262 cps     | 1.1 %         |
| 232Th (KED) | 0.127 ppb             | 27,804 cps        | 2.6 %         |
| 238U (KED)  | 0.038 ppb             | 11,295 cps        | 2.0 %         |

## Sample Summary

Instrument ID: iCAP Q

Analysis index: 22

Analysis name: 00028jian

Analysis started at: 9/3/2021 5:01:07 PM

User name: WINDOWS-UPCI4ER\Administrator

| Category    | Concentration average | Concentration RSD |
|-------------|-----------------------|-------------------|
| 6Li (KED)   | 145.602 %             | 8.4 %             |
| 9Be (KED)   | 0.020 ppb             | 95.6 %            |
| 11B (KED)   | 224.547 ppb           | 0.6 %             |
| 24Mg (KED)  | 538.783 ppb           | 8.4 %             |
| 27Al (KED)  | 710.250 ppb           | 0.7 %             |
| 45Sc (KED)  | 128.581 %             | 1.2 %             |
| 51V (KED)   | 1.062 ppb             | 2.4 %             |
| 52Cr (KED)  | 2.939 ppb             | 1.0 %             |
| 55Mn (KED)  | 16.606 ppb            | 0.7 %             |
| 56Fe (KED)  | 716.983 ppb           | 2.1 %             |
| 58Ni (KED)  | 4.554 ppb             | 2.8 %             |
| 59Co (KED)  | 0.313 ppb             | 0.4 %             |
| 63Cu (KED)  | -11.896 ppb           | 2.2 %             |
| 64Zn (KED)  | 200.165 ppb           | 2.2 %             |
| 69Ga (KED)  | 1.482 ppb             | 5.4 %             |
| 75As (KED)  | 0.739 ppb             | 1.3 %             |
| 80Se (KED)  | 0.875 ppb             | 10.7 %            |
| 85Rb (KED)  | 1.524 ppb             | 1.7 %             |
| 88Sr (KED)  | 6.821 ppb             | 1.6 %             |
| 89Y (KED)   | 106.946 %             | 1.7 %             |
| 107Ag (KED) | 0.071 ppb             | 2.8 %             |
| 114Cd (KED) | 0.033 ppb             | 9.5 %             |
| 115In (KED) | 94.515 %              | 1.3 %             |
| 133Cs (KED) | 0.133 ppb             | 1.6 %             |
| 138Ba (KED) | 5.284 ppb             | 1.3 %             |
| 139La (KED) | 0.462 ppb             | 0.1 %             |
| 140Ce (KED) | 0.930 ppb             | 1.9 %             |
| 141Pr (KED) | 0.107 ppb             | 4.1 %             |
| 142Nd (KED) | 0.576 ppb             | 0.7 %             |
| 152Sm (KED) | 0.079 ppb             | 4.2 %             |
| 153Eu (KED) | 0.016 ppb             | 1.9 %             |
| 158Gd (KED) | 0.072 ppb             | 4.4 %             |
| 159Tb (KED) | 93.100 %              | 1.6 %             |
| 164Dy (KED) | 0.047 ppb             | 1.0 %             |
| 166Er (KED) | 0.022 ppb             | 1.6 %             |
| 169Tm (KED) | 0.003 ppb             | 9.5 %             |
| 174Yb (KED) | 0.020 ppb             | 2.5 %             |
| 175Lu (KED) | -0.103 ppb            | 2.9 %             |
| 205Tl (KED) | 0.016 ppb             | 6.2 %             |
| 208Pb (KED) | -2.834 ppb            | 1.8 %             |
| 209Bi (KED) | 75.253 %              | 2.1 %             |
| 232Th (KED) | 0.182 ppb             | 3.2 %             |
| 238U (KED)  | 0.055 ppb             | 3.1 %             |

| Category   | Concentration average | Intensity average | Intensity RSD |
|------------|-----------------------|-------------------|---------------|
| 6Li (KED)  | 145.602 %             | 3,673 cps         | 8.4 %         |
| 9Be (KED)  | 0.020 ppb             | 3 cps             | 100.0 %       |
| 11B (KED)  | 224.547 ppb           | 727 cps           | 7.4 %         |
| 24Mg (KED) | 538.783 ppb           | 314,225 cps       | 0.6 %         |
| 27Al (KED) | 710.250 ppb           | 93,435 cps        | 1.5 %         |

| Category    | Concentration average | Intensity average | Intensity RSD |
|-------------|-----------------------|-------------------|---------------|
| 45Sc (KED)  | 128.581 %             | 50,624 cps        | 1.2 %         |
| 51V (KED)   | 1.062 ppb             | 9,699 cps         | 2.1 %         |
| 52Cr (KED)  | 2.939 ppb             | 45,419 cps        | 0.4 %         |
| 55Mn (KED)  | 16.606 ppb            | 121,139 cps       | 1.1 %         |
| 56Fe (KED)  | 716.983 ppb           | 8,685,578 cps     | 0.9 %         |
| 58Ni (KED)  | 4.554 ppb             | 96,372 cps        | 1.0 %         |
| 59Co (KED)  | 0.313 ppb             | 8,870 cps         | 1.6 %         |
| 63Cu (KED)  | -11.896 ppb           | 224,939 cps       | 0.7 %         |
| 64Zn (KED)  | 200.165 ppb           | 716,426 cps       | 0.1 %         |
| 69Ga (KED)  | 1.482 ppb             | 11,713 cps        | 3.8 %         |
| 75As (KED)  | 0.739 ppb             | 1,091 cps         | 0.8 %         |
| 80Se (KED)  | 0.875 ppb             | 1,475 cps         | 1.4 %         |
| 85Rb (KED)  | 1.524 ppb             | 9,963 cps         | 1.2 %         |
| 88Sr (KED)  | 6.821 ppb             | 56,810 cps        | 1.6 %         |
| 89Y (KED)   | 106.946 %             | 414,411 cps       | 1.7 %         |
| 107Ag (KED) | 0.071 ppb             | 3,462 cps         | 1.4 %         |
| 114Cd (KED) | 0.033 ppb             | 2,271 cps         | 3.8 %         |
| 115In (KED) | 94.515 %              | 737,006 cps       | 1.3 %         |
| 133Cs (KED) | 0.133 ppb             | 4,064 cps         | 1.0 %         |
| 138Ba (KED) | 5.284 ppb             | 277,593 cps       | 0.7 %         |
| 139La (KED) | 0.462 ppb             | 36,853 cps        | 1.6 %         |
| 140Ce (KED) | 0.930 ppb             | 99,678 cps        | 0.6 %         |
| 141Pr (KED) | 0.107 ppb             | 12,295 cps        | 2.7 %         |
| 142Nd (KED) | 0.576 ppb             | 26,728 cps        | 1.5 %         |
| 152Sm (KED) | 0.079 ppb             | 3,474 cps         | 2.8 %         |
| 153Eu (KED) | 0.016 ppb             | 1,375 cps         | 2.7 %         |
| 158Gd (KED) | 0.072 ppb             | 4,350 cps         | 2.6 %         |
| 159Tb (KED) | 93.100 %              | 4,031,289 cps     | 1.6 %         |
| 164Dy (KED) | 0.047 ppb             | 3,249 cps         | 2.0 %         |
| 166Er (KED) | 0.022 ppb             | 2,364 cps         | 2.7 %         |
| 169Tm (KED) | 0.003 ppb             | 868 cps           | 7.9 %         |
| 174Yb (KED) | 0.020 ppb             | 2,066 cps         | 2.7 %         |
| 175Lu (KED) | -0.103 ppb            | 22,185 cps        | 3.1 %         |
| 205Tl (KED) | 0.016 ppb             | 2,650 cps         | 3.8 %         |
| 208Pb (KED) | -2.834 ppb            | 171,460 cps       | 1.8 %         |
| 209Bi (KED) | 75.253 %              | 3,160,489 cps     | 2.1 %         |
| 232Th (KED) | 0.182 ppb             | 40,742 cps        | 1.3 %         |
| 238U (KED)  | 0.055 ppb             | 15,983 cps        | 0.8 %         |

## Sample Summary

Instrument ID: iCAP Q

Analysis index: 23

Analysis name: 921144279jian

Analysis started at: 9/3/2021 5:04:48 PM

User name: WINDOWS-UPCI4ER\Administrator

| Category    | Concentration average | Concentration RSD |
|-------------|-----------------------|-------------------|
| 6Li (KED)   | 142.297 %             | 1.6 %             |
| 9Be (KED)   | 0.027 ppb             | 115.6 %           |
| 11B (KED)   | 222.547 ppb           | 0.5 %             |
| 24Mg (KED)  | 543.825 ppb           | 2.9 %             |
| 27Al (KED)  | 888.080 ppb           | 1.0 %             |
| 45Sc (KED)  | 126.847 %             | 0.4 %             |
| 51V (KED)   | 1.235 ppb             | 0.7 %             |
| 52Cr (KED)  | 1.557 ppb             | 1.6 %             |
| 55Mn (KED)  | 15.893 ppb            | 1.0 %             |
| 56Fe (KED)  | 689.464 ppb           | 0.6 %             |
| 58Ni (KED)  | 1.518 ppb             | 3.2 %             |
| 59Co (KED)  | 0.278 ppb             | 1.7 %             |
| 63Cu (KED)  | -23.720 ppb           | 0.2 %             |
| 64Zn (KED)  | 207.689 ppb           | 0.5 %             |
| 69Ga (KED)  | 1.246 ppb             | 5.3 %             |
| 75As (KED)  | 0.608 ppb             | 8.1 %             |
| 80Se (KED)  | 0.773 ppb             | 34.2 %            |
| 85Rb (KED)  | 1.483 ppb             | 2.8 %             |
| 88Sr (KED)  | 7.532 ppb             | 2.6 %             |
| 89Y (KED)   | 107.414 %             | 0.3 %             |
| 107Ag (KED) | 0.032 ppb             | 3.5 %             |
| 114Cd (KED) | -0.007 ppb            | 8.5 %             |
| 115In (KED) | 93.952 %              | 0.3 %             |
| 133Cs (KED) | 0.190 ppb             | 2.8 %             |
| 138Ba (KED) | 4.388 ppb             | 1.9 %             |
| 139La (KED) | 0.566 ppb             | 0.4 %             |
| 140Ce (KED) | 1.211 ppb             | 2.5 %             |
| 141Pr (KED) | 0.134 ppb             | 3.6 %             |
| 142Nd (KED) | 0.713 ppb             | 1.2 %             |
| 152Sm (KED) | 0.097 ppb             | 1.1 %             |
| 153Eu (KED) | 0.020 ppb             | 1.9 %             |
| 158Gd (KED) | 0.086 ppb             | 2.3 %             |
| 159Tb (KED) | 94.822 %              | 0.3 %             |
| 164Dy (KED) | 0.061 ppb             | 1.8 %             |
| 166Er (KED) | 0.026 ppb             | 3.9 %             |
| 169Tm (KED) | 0.004 ppb             | 3.8 %             |
| 174Yb (KED) | 0.023 ppb             | 4.0 %             |
| 175Lu (KED) | -0.106 ppb            | 2.4 %             |
| 205Tl (KED) | 0.014 ppb             | 6.0 %             |
| 208Pb (KED) | -3.309 ppb            | 0.8 %             |
| 209Bi (KED) | 77.873 %              | 0.3 %             |
| 232Th (KED) | 0.213 ppb             | 0.7 %             |
| 238U (KED)  | 0.053 ppb             | 3.3 %             |

| Category   | Concentration average | Intensity average | Intensity RSD |
|------------|-----------------------|-------------------|---------------|
| 6Li (KED)  | 142.297 %             | 3,589 cps         | 1.6 %         |
| 9Be (KED)  | 0.027 ppb             | 4 cps             | 114.6 %       |
| 11B (KED)  | 222.547 ppb           | 819 cps           | 5.6 %         |
| 24Mg (KED) | 543.825 ppb           | 311,231 cps       | 1.3 %         |
| 27Al (KED) | 888.080 ppb           | 114,646 cps       | 1.3 %         |

| Category    | Concentration average | Intensity average | Intensity RSD |
|-------------|-----------------------|-------------------|---------------|
| 45Sc (KED)  | 126.847 %             | 49,941 cps        | 0.4 %         |
| 51V (KED)   | 1.235 ppb             | 11,109 cps        | 1.0 %         |
| 52Cr (KED)  | 1.557 ppb             | 25,867 cps        | 1.4 %         |
| 55Mn (KED)  | 15.893 ppb            | 114,507 cps       | 1.2 %         |
| 56Fe (KED)  | 689.464 ppb           | 8,244,582 cps     | 0.8 %         |
| 58Ni (KED)  | 1.518 ppb             | 46,846 cps        | 1.3 %         |
| 59Co (KED)  | 0.278 ppb             | 7,804 cps         | 1.3 %         |
| 63Cu (KED)  | -23.720 ppb           | 79,970 cps        | 0.9 %         |
| 64Zn (KED)  | 207.689 ppb           | 741,864 cps       | 0.6 %         |
| 69Ga (KED)  | 1.246 ppb             | 10,398 cps        | 4.0 %         |
| 75As (KED)  | 0.608 ppb             | 924 cps           | 7.1 %         |
| 80Se (KED)  | 0.773 ppb             | 1,441 cps         | 7.3 %         |
| 85Rb (KED)  | 1.483 ppb             | 9,776 cps         | 2.6 %         |
| 88Sr (KED)  | 7.532 ppb             | 62,749 cps        | 2.3 %         |
| 89Y (KED)   | 107.414 %             | 416,225 cps       | 0.3 %         |
| 107Ag (KED) | 0.032 ppb             | 1,639 cps         | 3.3 %         |
| 114Cd (KED) | -0.007 ppb            | 1,543 cps         | 0.4 %         |
| 115In (KED) | 93.952 %              | 732,612 cps       | 0.3 %         |
| 133Cs (KED) | 0.190 ppb             | 5,599 cps         | 2.3 %         |
| 138Ba (KED) | 4.388 ppb             | 247,996 cps       | 1.1 %         |
| 139La (KED) | 0.566 ppb             | 45,787 cps        | 0.2 %         |
| 140Ce (KED) | 1.211 ppb             | 131,297 cps       | 2.1 %         |
| 141Pr (KED) | 0.134 ppb             | 15,524 cps        | 3.6 %         |
| 142Nd (KED) | 0.713 ppb             | 33,487 cps        | 0.9 %         |
| 152Sm (KED) | 0.097 ppb             | 4,321 cps         | 0.7 %         |
| 153Eu (KED) | 0.020 ppb             | 1,740 cps         | 2.1 %         |
| 158Gd (KED) | 0.086 ppb             | 5,291 cps         | 2.0 %         |
| 159Tb (KED) | 94.822 %              | 4,105,826 cps     | 0.3 %         |
| 164Dy (KED) | 0.061 ppb             | 4,224 cps         | 1.6 %         |
| 166Er (KED) | 0.026 ppb             | 2,700 cps         | 3.4 %         |
| 169Tm (KED) | 0.004 ppb             | 1,131 cps         | 3.2 %         |
| 174Yb (KED) | 0.023 ppb             | 2,435 cps         | 4.0 %         |
| 175Lu (KED) | -0.106 ppb            | 22,229 cps        | 2.1 %         |
| 205Tl (KED) | 0.014 ppb             | 2,517 cps         | 6.0 %         |
| 208Pb (KED) | -3.309 ppb            | 124,954 cps       | 1.9 %         |
| 209Bi (KED) | 77.873 %              | 3,270,532 cps     | 0.3 %         |
| 232Th (KED) | 0.213 ppb             | 49,307 cps        | 1.0 %         |
| 238U (KED)  | 0.053 ppb             | 16,065 cps        | 3.2 %         |

## Sample Summary

Instrument ID: iCAP Q

Analysis index: 24

Analysis name: 921057709jian

Analysis started at: 9/3/2021 5:08:10 PM

User name: WINDOWS-UPCI4ER\Administrator

| Category    | Concentration average | Concentration RSD |
|-------------|-----------------------|-------------------|
| 6Li (KED)   | 138.111 %             | 3.7 %             |
| 9Be (KED)   | 0.047 ppb             | 47.5 %            |
| 11B (KED)   | 210.771 ppb           | 0.4 %             |
| 24Mg (KED)  | 488.193 ppb           | 4.4 %             |
| 27Al (KED)  | 786.355 ppb           | 0.6 %             |
| 45Sc (KED)  | 125.824 %             | 0.6 %             |
| 51V (KED)   | 1.063 ppb             | 2.1 %             |
| 52Cr (KED)  | 2.576 ppb             | 1.3 %             |
| 55Mn (KED)  | 14.116 ppb            | 0.5 %             |
| 56Fe (KED)  | 566.377 ppb           | 1.5 %             |
| 58Ni (KED)  | 1.320 ppb             | 2.1 %             |
| 59Co (KED)  | 0.282 ppb             | 1.1 %             |
| 63Cu (KED)  | -22.495 ppb           | 0.3 %             |
| 64Zn (KED)  | 190.817 ppb           | 0.3 %             |
| 69Ga (KED)  | 1.035 ppb             | 2.0 %             |
| 75As (KED)  | 0.535 ppb             | 3.8 %             |
| 80Se (KED)  | 0.383 ppb             | 57.3 %            |
| 85Rb (KED)  | 1.439 ppb             | 1.5 %             |
| 88Sr (KED)  | 6.992 ppb             | 2.7 %             |
| 89Y (KED)   | 107.208 %             | 0.8 %             |
| 107Ag (KED) | 0.033 ppb             | 8.8 %             |
| 114Cd (KED) | -0.005 ppb            | 89.1 %            |
| 115In (KED) | 95.558 %              | 1.1 %             |
| 133Cs (KED) | 0.152 ppb             | 2.2 %             |
| 138Ba (KED) | 3.734 ppb             | 2.1 %             |
| 139La (KED) | 0.584 ppb             | 2.0 %             |
| 140Ce (KED) | 1.232 ppb             | 2.1 %             |
| 141Pr (KED) | 0.138 ppb             | 1.7 %             |
| 142Nd (KED) | 0.741 ppb             | 1.6 %             |
| 152Sm (KED) | 0.094 ppb             | 9.5 %             |
| 153Eu (KED) | 0.020 ppb             | 4.1 %             |
| 158Gd (KED) | 0.086 ppb             | 5.4 %             |
| 159Tb (KED) | 96.570 %              | 0.8 %             |
| 164Dy (KED) | 0.057 ppb             | 3.7 %             |
| 166Er (KED) | 0.027 ppb             | 2.3 %             |
| 169Tm (KED) | 0.004 ppb             | 4.7 %             |
| 174Yb (KED) | 0.023 ppb             | 2.3 %             |
| 175Lu (KED) | -0.106 ppb            | 3.4 %             |
| 205Tl (KED) | 0.011 ppb             | 9.8 %             |
| 208Pb (KED) | -3.318 ppb            | 1.2 %             |
| 209Bi (KED) | 79.453 %              | 3.6 %             |
| 232Th (KED) | 0.214 ppb             | 3.2 %             |
| 238U (KED)  | 0.050 ppb             | 3.8 %             |

| Category   | Concentration average | Intensity average | Intensity RSD |
|------------|-----------------------|-------------------|---------------|
| 6Li (KED)  | 138.111 %             | 3,484 cps         | 3.7 %         |
| 9Be (KED)  | 0.047 ppb             | 8 cps             | 49.5 %        |
| 11B (KED)  | 210.771 ppb           | 1,402 cps         | 0.4 %         |
| 24Mg (KED) | 488.193 ppb           | 271,624 cps       | 0.8 %         |
| 27Al (KED) | 786.355 ppb           | 100,967 cps       | 0.3 %         |

| Category    | Concentration average | Intensity average | Intensity RSD |
|-------------|-----------------------|-------------------|---------------|
| 45Sc (KED)  | 125.824 %             | 49,538 cps        | 0.6 %         |
| 51V (KED)   | 1.063 ppb             | 9,504 cps         | 2.4 %         |
| 52Cr (KED)  | 2.576 ppb             | 39,505 cps        | 0.5 %         |
| 55Mn (KED)  | 14.116 ppb            | 101,210 cps       | 0.8 %         |
| 56Fe (KED)  | 566.377 ppb           | 6,734,085 cps     | 1.0 %         |
| 58Ni (KED)  | 1.320 ppb             | 43,346 cps        | 0.9 %         |
| 59Co (KED)  | 0.282 ppb             | 7,871 cps         | 1.5 %         |
| 63Cu (KED)  | -22.495 ppb           | 94,908 cps        | 0.9 %         |
| 64Zn (KED)  | 190.817 ppb           | 690,859 cps       | 0.8 %         |
| 69Ga (KED)  | 1.035 ppb             | 9,153 cps         | 2.2 %         |
| 75As (KED)  | 0.535 ppb             | 828 cps           | 2.8 %         |
| 80Se (KED)  | 0.383 ppb             | 1,285 cps         | 7.5 %         |
| 85Rb (KED)  | 1.439 ppb             | 9,507 cps         | 1.2 %         |
| 88Sr (KED)  | 6.992 ppb             | 58,314 cps        | 1.9 %         |
| 89Y (KED)   | 107.208 %             | 415,427 cps       | 0.8 %         |
| 107Ag (KED) | 0.033 ppb             | 1,746 cps         | 8.1 %         |
| 114Cd (KED) | -0.005 ppb            | 1,610 cps         | 3.8 %         |
| 115In (KED) | 95.558 %              | 745,136 cps       | 1.1 %         |
| 133Cs (KED) | 0.152 ppb             | 4,630 cps         | 0.9 %         |
| 138Ba (KED) | 3.734 ppb             | 226,726 cps       | 0.7 %         |
| 139La (KED) | 0.584 ppb             | 48,021 cps        | 1.2 %         |
| 140Ce (KED) | 1.232 ppb             | 135,919 cps       | 1.4 %         |
| 141Pr (KED) | 0.138 ppb             | 16,237 cps        | 2.0 %         |
| 142Nd (KED) | 0.741 ppb             | 35,404 cps        | 1.4 %         |
| 152Sm (KED) | 0.094 ppb             | 4,262 cps         | 8.4 %         |
| 153Eu (KED) | 0.020 ppb             | 1,812 cps         | 4.3 %         |
| 158Gd (KED) | 0.086 ppb             | 5,403 cps         | 4.5 %         |
| 159Tb (KED) | 96.570 %              | 4,181,510 cps     | 0.8 %         |
| 164Dy (KED) | 0.057 ppb             | 4,054 cps         | 3.0 %         |
| 166Er (KED) | 0.027 ppb             | 2,841 cps         | 2.5 %         |
| 169Tm (KED) | 0.004 ppb             | 1,165 cps         | 4.4 %         |
| 174Yb (KED) | 0.023 ppb             | 2,456 cps         | 2.9 %         |
| 175Lu (KED) | -0.106 ppb            | 22,601 cps        | 3.3 %         |
| 205Tl (KED) | 0.011 ppb             | 2,056 cps         | 7.0 %         |
| 208Pb (KED) | -3.318 ppb            | 126,353 cps       | 1.6 %         |
| 209Bi (KED) | 79.453 %              | 3,336,893 cps     | 3.6 %         |
| 232Th (KED) | 0.214 ppb             | 50,466 cps        | 1.7 %         |
| 238U (KED)  | 0.050 ppb             | 15,661 cps        | 2.8 %         |
