# Supplementary material for: Geographic and breed-specific traceability of cashmere via mineral element profiling in Inner Mongolia (Ordos, Chifeng, and Alxa League)
Source: Royal Society of Chemistry journal article supplement (doi:10.1039/d5ra08122j), 2026-01-01
Supplement: d5ra08122j1.zip [file 20210907-a zuo qi yin gen su mu zha de gai 3+a la shan dong feng zhen e ga cha 8+e qi 9.pdf › ԭʼ޿/20210907-a zuo qi yin gen su mu zha de gai 3+a la shan dong feng zhen e ga cha 8+e qi 9.pdf]

## Instrument Summary:

Instrument ID: iCAP Q  
Serial Number: Undefined

## Labbook Summary:

Path and filename: \_Application Data\Workspace\LabBooks\wlw\20210907-1.imexp  
Labbook created by: Administrator  
Based on template:  
Hardware configuration: iCAPQ1  
Labbook type: eQuant  
Qtegra version (last saved): 2.7.2425.154  
Labbook started: 9/7/2021 3:23:48 PM  
Labbook finished: 9/7/2021 4:53:23 PM

## Method Summary:

| Isotope     | Mode | Dwell time (s) | # of Channels | Spacing | Resolution | IS          |
|-------------|------|----------------|---------------|---------|------------|-------------|
| 6Li (KED)   | KED  | 0.03           | 3             | 0.1     | Normal     |             |
| 9Be (KED)   | KED  | 0.03           | 3             | 0.1     | Normal     | 6Li (KED)   |
| 11B (KED)   | KED  | 0.03           | 3             | 0.1     | Normal     | 6Li (KED)   |
| 24Mg (KED)  | KED  | 0.03           | 3             | 0.1     | Normal     | 6Li (KED)   |
| 27Al (KED)  | KED  | 0.03           | 3             | 0.1     | Normal     | 45Sc (KED)  |
| 45Sc (KED)  | KED  | 0.03           | 3             | 0.1     | Normal     |             |
| 51V (KED)   | KED  | 0.03           | 3             | 0.1     | Normal     | 45Sc (KED)  |
| 52Cr (KED)  | KED  | 0.03           | 3             | 0.1     | Normal     | 45Sc (KED)  |
| 55Mn (KED)  | KED  | 0.03           | 3             | 0.1     | Normal     | 45Sc (KED)  |
| 56Fe (KED)  | KED  | 0.03           | 3             | 0.1     | Normal     | 45Sc (KED)  |
| 58Ni (KED)  | KED  | 0.03           | 3             | 0.1     | Normal     | 45Sc (KED)  |
| 59Co (KED)  | KED  | 0.03           | 3             | 0.1     | Normal     | 45Sc (KED)  |
| 63Cu (KED)  | KED  | 0.03           | 3             | 0.1     | Normal     | 89Y (KED)   |
| 64Zn (KED)  | KED  | 0.03           | 3             | 0.1     | Normal     | 89Y (KED)   |
| 69Ga (KED)  | KED  | 0.03           | 3             | 0.1     | Normal     | 89Y (KED)   |
| 75As (KED)  | KED  | 0.03           | 3             | 0.1     | Normal     | 89Y (KED)   |
| 80Se (KED)  | KED  | 0.03           | 3             | 0.1     | Normal     | 89Y (KED)   |
| 85Rb (KED)  | KED  | 0.03           | 3             | 0.1     | Normal     | 89Y (KED)   |
| 88Sr (KED)  | KED  | 0.03           | 3             | 0.1     | Normal     | 89Y (KED)   |
| 89Y (KED)   | KED  | 0.03           | 3             | 0.1     | Normal     |             |
| 107Ag (KED) | KED  | 0.03           | 3             | 0.1     | Normal     | 115In (KED) |
| 114Cd (KED) | KED  | 0.03           | 3             | 0.1     | Normal     | 115In (KED) |
| 115In (KED) | KED  | 0.03           | 3             | 0.1     | Normal     |             |
| 133Cs (KED) | KED  | 0.03           | 3             | 0.1     | Normal     | 115In (KED) |
| 138Ba (KED) | KED  | 0.03           | 3             | 0.1     | Normal     | 159Tb (KED) |
| 139La (KED) | KED  | 0.03           | 3             | 0.1     | Normal     | 159Tb (KED) |
| 140Ce (KED) | KED  | 0.03           | 3             | 0.1     | Normal     | 159Tb (KED) |
| 141Pr (KED) | KED  | 0.03           | 3             | 0.1     | Normal     | 159Tb (KED) |
| 142Nd (KED) | KED  | 0.03           | 3             | 0.1     | Normal     | 159Tb (KED) |
| 152Sm (KED) | KED  | 0.03           | 3             | 0.1     | Normal     | 159Tb (KED) |
| 153Eu (KED) | KED  | 0.03           | 3             | 0.1     | Normal     | 159Tb (KED) |
| 158Gd (KED) | KED  | 0.03           | 3             | 0.1     | Normal     | 159Tb (KED) |
| 159Tb (KED) | KED  | 0.03           | 3             | 0.1     | Normal     |             |
| 164Dy (KED) | KED  | 0.03           | 3             | 0.1     | Normal     | 159Tb (KED) |
| 166Er (KED) | KED  | 0.03           | 3             | 0.1     | Normal     | 159Tb (KED) |
| 169Tm (KED) | KED  | 0.03           | 3             | 0.1     | Normal     | 159Tb (KED) |
| 174Yb (KED) | KED  | 0.03           | 3             | 0.1     | Normal     | 159Tb (KED) |
| 175Lu (KED) | KED  | 0.03           | 3             | 0.1     | Normal     | 159Tb (KED) |
| 205Tl (KED) | KED  | 0.03           | 3             | 0.1     | Normal     | 209Bi (KED) |
| 208Pb (KED) | KED  | 0.03           | 3             | 0.1     | Normal     | 209Bi (KED) |
| 209Bi (KED) | KED  | 0.03           | 3             | 0.1     | Normal     |             |
| 232Th (KED) | KED  | 0.03           | 3             | 0.1     | Normal     | 209Bi (KED) |
| 238U (KED)  | KED  | 0.03           | 3             | 0.1     | Normal     | 209Bi (KED) |

| Isotope     | Mode | Dwell time (s) | # of Channels | Spacing | Resolution |
|-------------|------|----------------|---------------|---------|------------|
| 6Li (KED)   | KED  | 0.03           | 3             | 0.1     | Normal     |
| 45Sc (KED)  | KED  | 0.03           | 3             | 0.1     | Normal     |
| 89Y (KED)   | KED  | 0.03           | 3             | 0.1     | Normal     |
| 115In (KED) | KED  | 0.03           | 3             | 0.1     | Normal     |
| 159Tb (KED) | KED  | 0.03           | 3             | 0.1     | Normal     |
| 209Bi (KED) | KED  | 0.03           | 3             | 0.1     | Normal     |

| No. of sweeps | Time per sweep[s] | Time per main run[s] |
|---------------|-------------------|----------------------|
| 10            | 3.87              | 38.7                 |

## Calibration Curves:

9Be (KED)

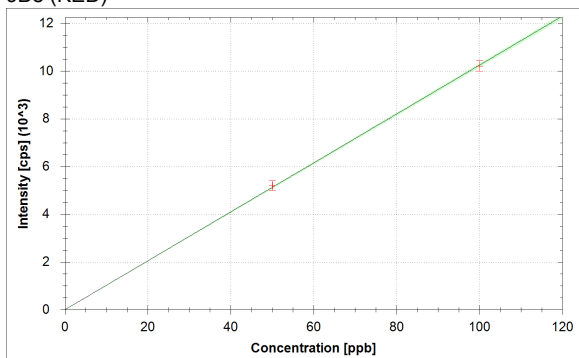

$$f(x) = 102.4500 \cdot x + 1.0916$$

$$R^2 = 0.9999$$

$$\text{BEC} = 0.011 \text{ ppb}$$

$$\text{LoD} = 0.0000 \text{ ppb}$$

11B (KED)

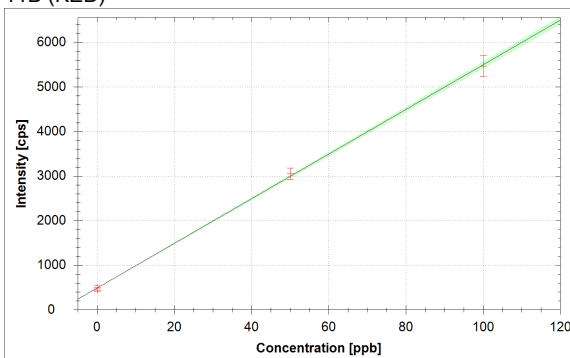

$$f(x) = 50.0727 \cdot x + 488.6825$$

$$R^2 = 0.9996$$

$$\text{BEC} = 9.759 \text{ ppb}$$

$$\text{LoD} = 1.8367 \text{ ppb}$$

24Mg (KED)

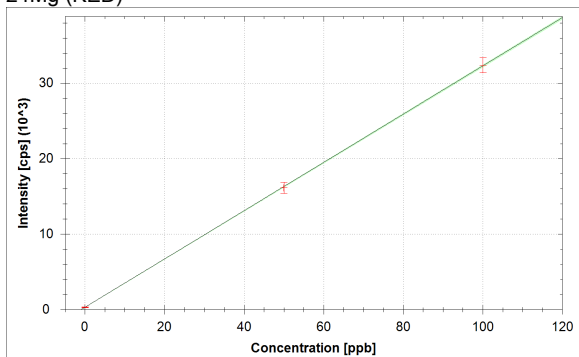

$$f(x) = 319.9341 \cdot x + 299.4187$$

$$R^2 = 0.9999$$

$$\text{BEC} = 0.936 \text{ ppb}$$

$$\text{LoD} = 0.2879 \text{ ppb}$$

27Al (KED)

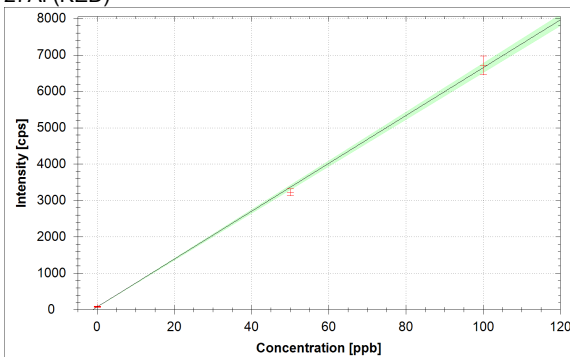

$$f(x) = 65.7333 \cdot x + 73.9979$$

$$R^2 = 0.9992$$

$$\text{BEC} = 1.126 \text{ ppb}$$

$$\text{LoD} = 0.4120 \text{ ppb}$$

51V (KED)

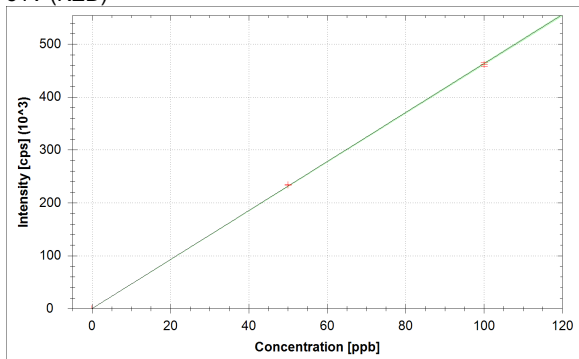

$$f(x) = 4630.4647 \cdot x + 7.5109$$

$$R^2 = 1.0000$$

$$\text{BEC} = 0.002 \text{ ppb}$$

$$\text{LoD} = 0.0025 \text{ ppb}$$

52Cr (KED)

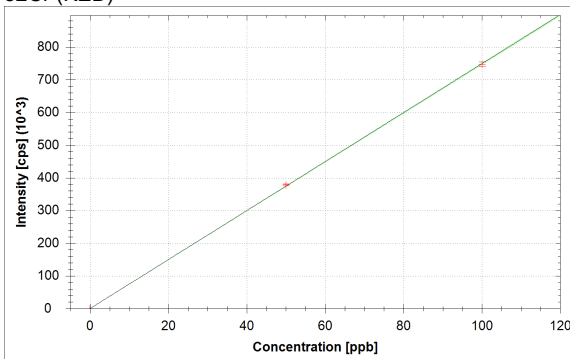

$$f(x) = 7491.6281 \cdot x + 102.5563$$

$$R^2 = 1.0000$$

$$\text{BEC} = 0.014 \text{ ppb}$$

$$\text{LoD} = 0.0091 \text{ ppb}$$

55Mn (KED)

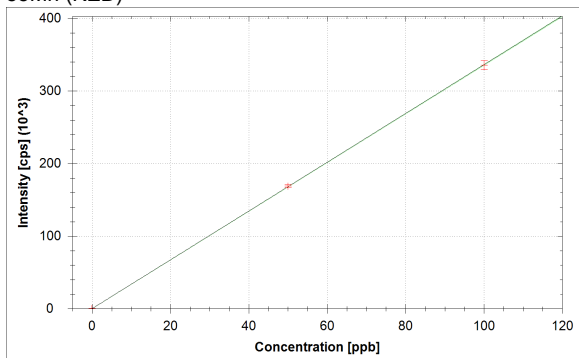

$$f(x) = 3360.3138 \cdot x + 124.2832$$

$$R^2 = 1.0000$$

$$\text{BEC} = 0.037 \text{ ppb}$$

$$\text{LoD} = 0.0119 \text{ ppb}$$

56Fe (KED)

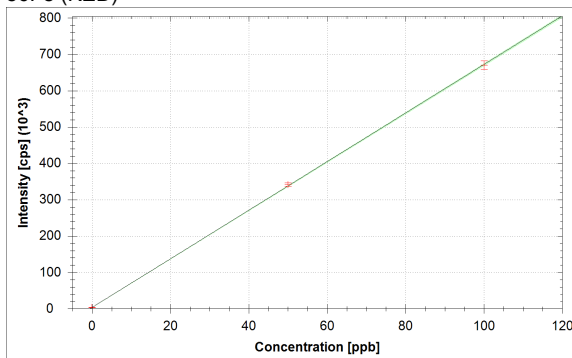

$$f(x) = 6685.3726 \cdot x + 3571.9145$$

$$R^2 = 1.0000$$

$$\text{BEC} = 0.534 \text{ ppb}$$

$$\text{LoD} = 0.1094 \text{ ppb}$$

58Ni (KED)

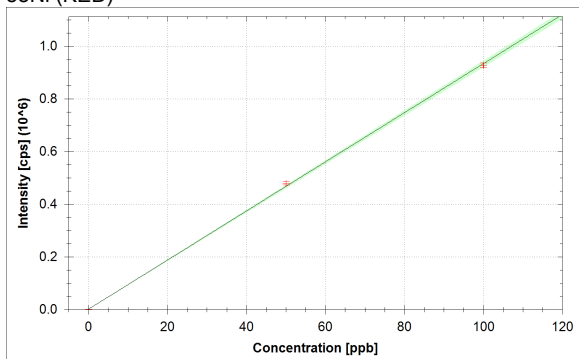

$$f(x) = 9322.9971 \cdot x + 1407.9880$$

$$R^2 = 0.9997$$

$$\text{BEC} = 0.151 \text{ ppb}$$

$$\text{LoD} = 0.0263 \text{ ppb}$$

59Co (KED)

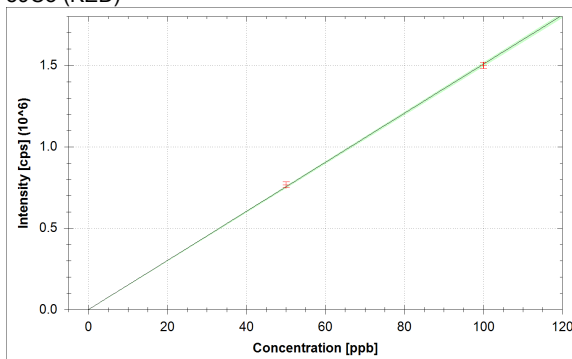

$$f(x) = 15064.8666 \cdot x + 162.2361$$

$$R^2 = 0.9999$$

$$\text{BEC} = 0.011 \text{ ppb}$$

$$\text{LoD} = 0.0026 \text{ ppb}$$

63Cu (KED)

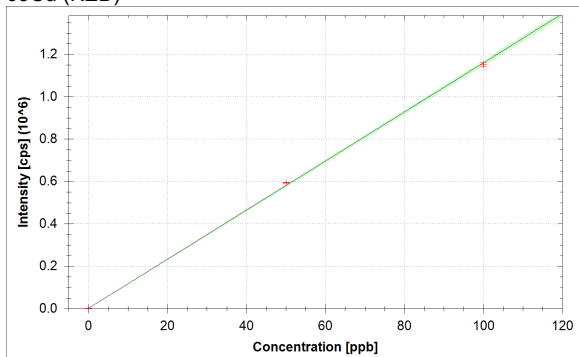

$$f(x) = 11581.0582 \cdot x + 1184.8155$$

$$R^2 = 0.9998$$

$$\text{BEC} = 0.102 \text{ ppb}$$

$$\text{LoD} = 0.0123 \text{ ppb}$$

64Zn (KED)

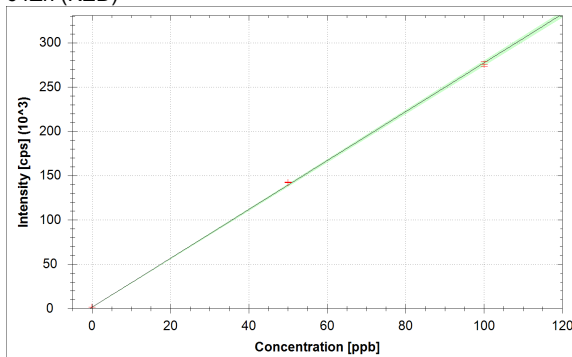

$$f(x) = 2756.5136 \cdot x + 1527.8725$$

$$R^2 = 0.9998$$

$$\text{BEC} = 0.554 \text{ ppb}$$

$$\text{LoD} = 0.0569 \text{ ppb}$$

69Ga (KED)

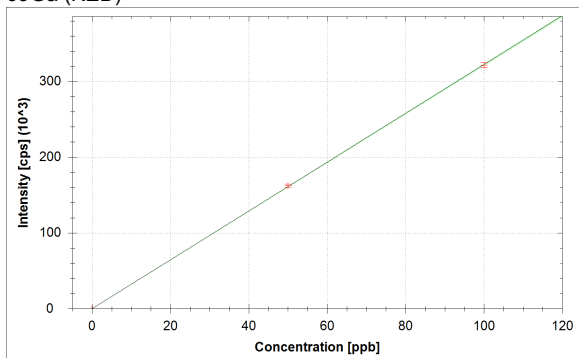

$$f(x) = 3221.3891 \cdot x + 64.8231$$

$$R^2 = 1.0000$$

$$\text{BEC} = 0.020 \text{ ppb}$$

$$\text{LoD} = 0.0034 \text{ ppb}$$

75As (KED)

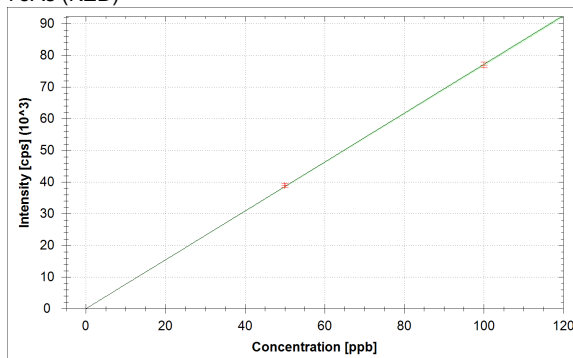

$$f(x) = 771.2574 \cdot x + 4.2711$$

$$R^2 = 1.0000$$

$$\text{BEC} = 0.006 \text{ ppb}$$

$$\text{LoD} = 0.0315 \text{ ppb}$$

80Se (KED)

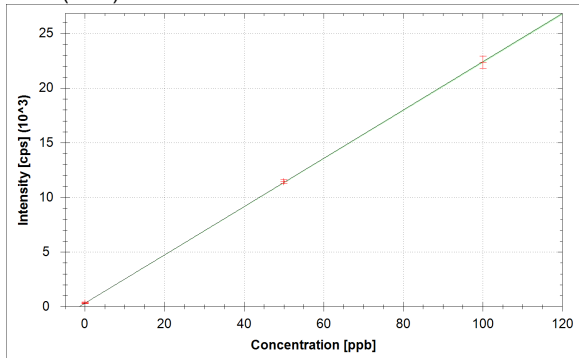

$$f(x) = 220.9615 \cdot x + 301.7525$$

$$R^2 = 1.0000$$

$$\text{BEC} = 1.366 \text{ ppb}$$

$$\text{LoD} = 0.9759 \text{ ppb}$$

85Rb (KED)

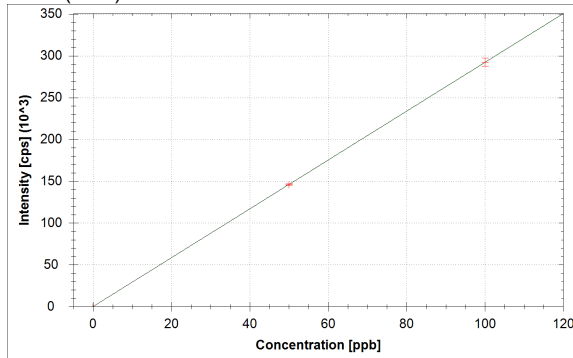

$$f(x) = 2921.9364 \cdot x + 39.8233$$

$$R^2 = 1.0000$$

$$\text{BEC} = 0.014 \text{ ppb}$$

$$\text{LoD} = 0.0270 \text{ ppb}$$

88Sr (KED)

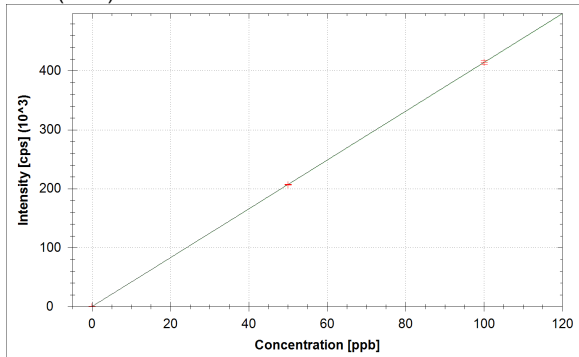

$$f(x) = 4141.3409 \cdot x + 140.2032$$

$$R^2 = 1.0000$$

$$\text{BEC} = 0.034 \text{ ppb}$$

$$\text{LoD} = 0.0095 \text{ ppb}$$

107Ag (KED)

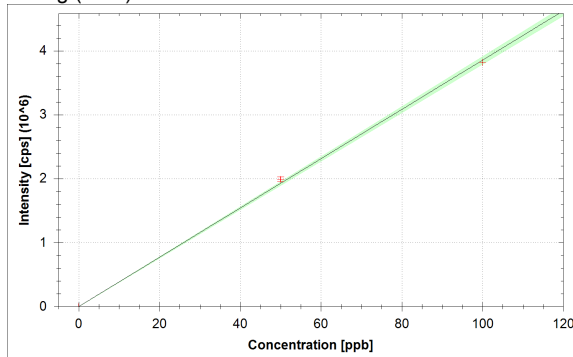

$$f(x) = 38536.2976 \cdot x + 30.5892$$

$$R^2 = 0.9995$$

$$\text{BEC} = 0.001 \text{ ppb}$$

$$\text{LoD} = 0.0003 \text{ ppb}$$

114Cd (KED)

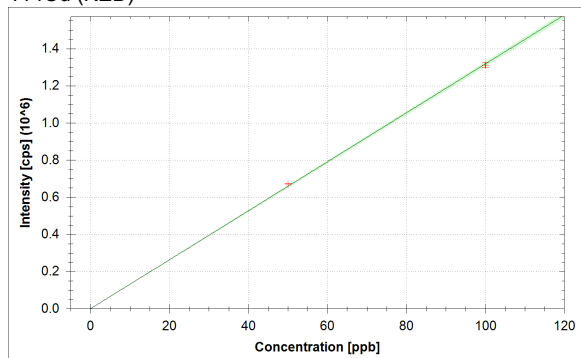

$$f(x) = 13174.4067 \cdot x + 124.9011$$

$$R^2 = 0.9998$$

$$\text{BEC} = 0.009 \text{ ppb}$$

$$\text{LoD} = 0.0025 \text{ ppb}$$

133Cs (KED)

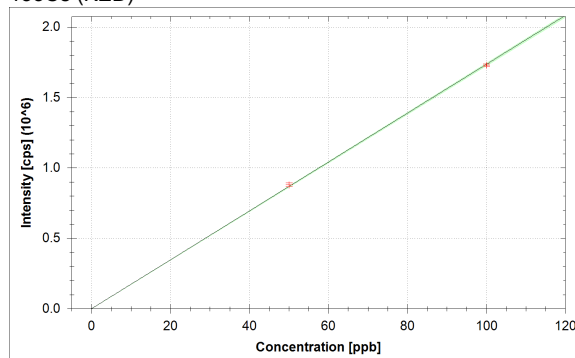

$$f(x) = 17352.1544 \cdot x + 29.5633$$

$$R^2 = 0.9999$$

$$\text{BEC} = 0.002 \text{ ppb}$$

$$\text{LoD} = 0.0000 \text{ ppb}$$

138Ba (KED)

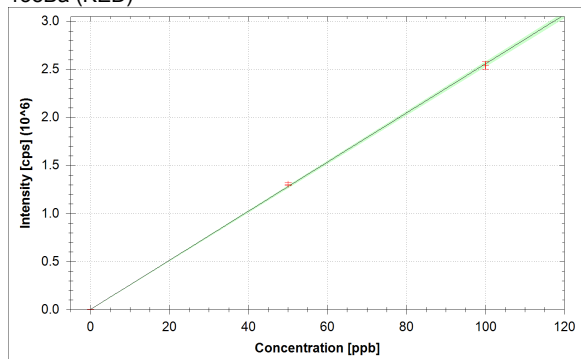

$$f(x) = 25546.2363 \cdot x + 1497.2447$$

$$R^2 = 0.9998$$

$$\text{BEC} = 0.059 \text{ ppb}$$

$$\text{LoD} = 0.0069 \text{ ppb}$$

139La (KED)

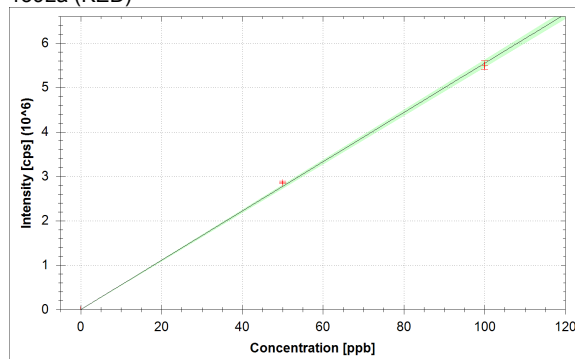

$$f(x) = 55450.5511 \cdot x + 99.5164$$

$$R^2 = 0.9995$$

$$\text{BEC} = 0.002 \text{ ppb}$$

$$\text{LoD} = 0.0014 \text{ ppb}$$

140Ce (KED)

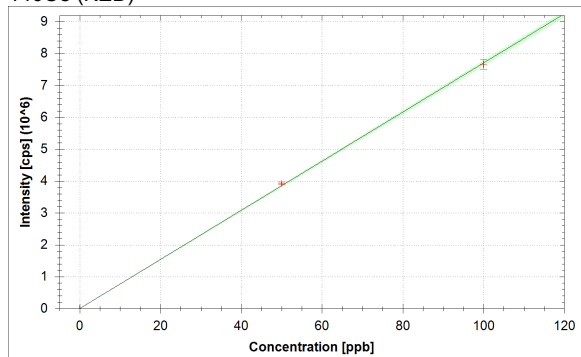

$$f(x) = 77047.2826 \cdot x + 412.1716$$

$$R^2 = 0.9998$$

$$\text{BEC} = 0.005 \text{ ppb}$$

$$\text{LoD} = 0.0001 \text{ ppb}$$

141Pr (KED)

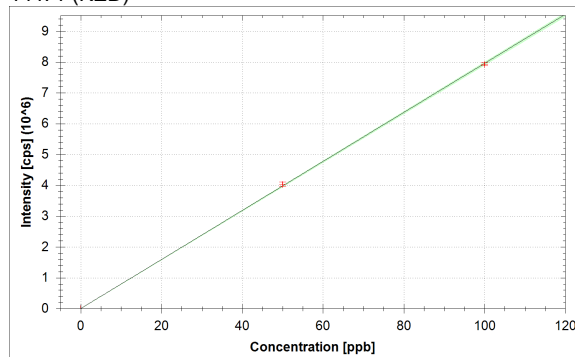

$$f(x) = 79586.0084 \cdot x + 38.9020$$

$$R^2 = 0.9999$$

$$\text{BEC} = 0.000 \text{ ppb}$$

$$\text{LoD} = 0.0006 \text{ ppb}$$

**<sup>142</sup>Nd (KED)**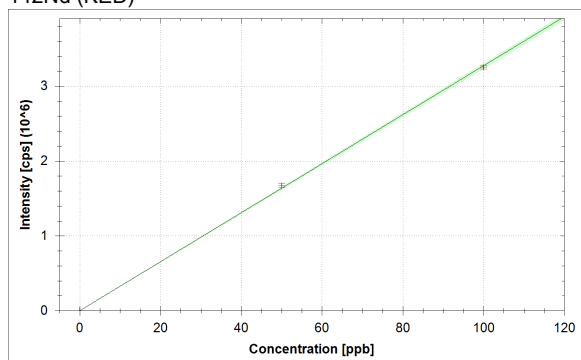

$$f(x) = 32731.0711 \cdot x + 79.9450$$

$$R^2 = 0.9998$$

$$\text{BEC} = 0.002 \text{ ppb}$$

$$\text{LoD} = 0.0008 \text{ ppb}$$

**<sup>152</sup>Sm (KED)**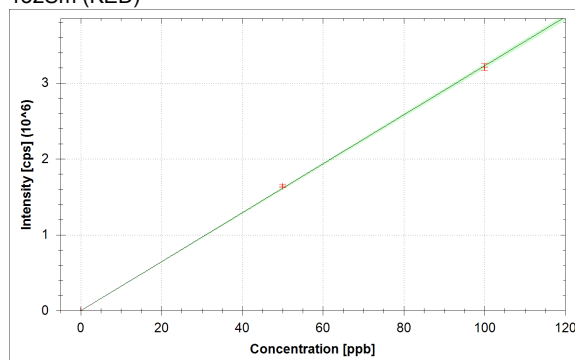

$$f(x) = 32254.4076 \cdot x + 11.8595$$

$$R^2 = 0.9998$$

$$\text{BEC} = 0.000 \text{ ppb}$$

$$\text{LoD} = 0.0008 \text{ ppb}$$

**<sup>153</sup>Eu (KED)**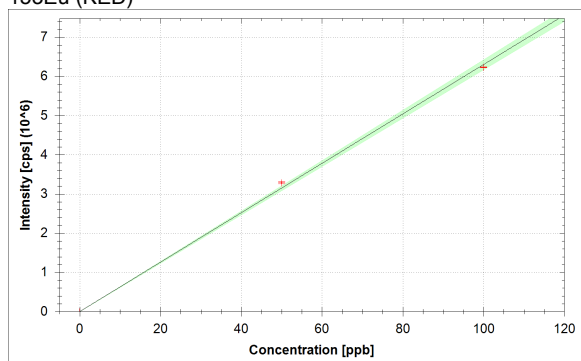

$$f(x) = 63017.8622 \cdot x + 12.9853$$

$$R^2 = 0.9991$$

$$\text{BEC} = 0.000 \text{ ppb}$$

$$\text{LoD} = 0.0001 \text{ ppb}$$

**<sup>158</sup>Gd (KED)**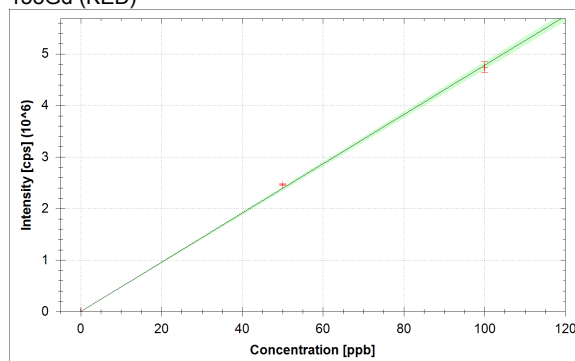

$$f(x) = 47784.6244 \cdot x + 16.2074$$

$$R^2 = 0.9996$$

$$\text{BEC} = 0.000 \text{ ppb}$$

$$\text{LoD} = 0.0006 \text{ ppb}$$

**<sup>164</sup>Dy (KED)**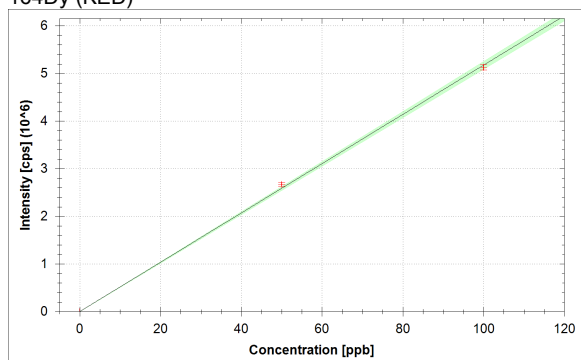

$$f(x) = 51735.1200 \cdot x + 27.0378$$

$$R^2 = 0.9995$$

$$\text{BEC} = 0.001 \text{ ppb}$$

$$\text{LoD} = 0.0008 \text{ ppb}$$

**<sup>166</sup>Er (KED)**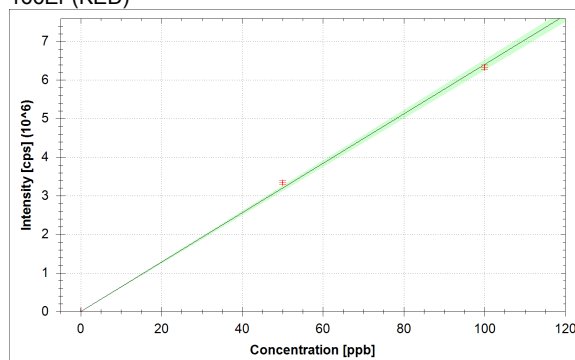

$$f(x) = 63996.7913 \cdot x + 403.3586$$

$$R^2 = 0.9992$$

$$\text{BEC} = 0.006 \text{ ppb}$$

$$\text{LoD} = 0.0022 \text{ ppb}$$

169Tm (KED)

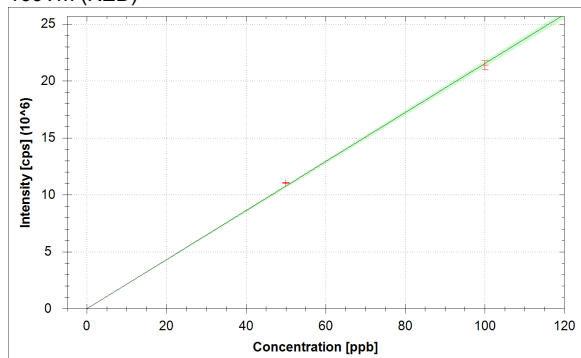

$$f(x) = 215211.1656 \cdot x + 19.4677$$

$$R^2 = 0.9997$$

$$\text{BEC} = 0.000 \text{ ppb}$$

$$\text{LoD} = 0.0002 \text{ ppb}$$

174Yb (KED)

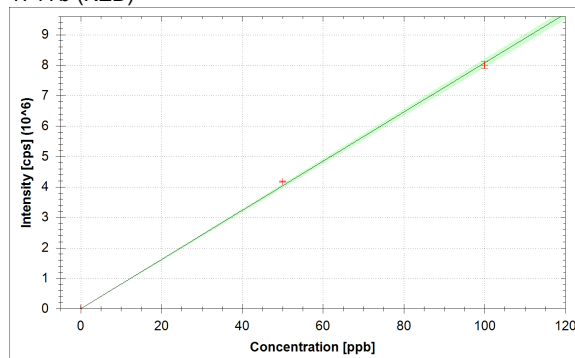

$$f(x) = 80725.9692 \cdot x + 47.5415$$

$$R^2 = 0.9994$$

$$\text{BEC} = 0.001 \text{ ppb}$$

$$\text{LoD} = 0.0008 \text{ ppb}$$

175Lu (KED)

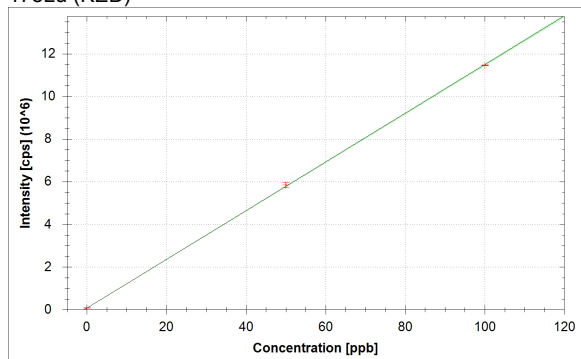

$$f(x) = 114235.6952 \cdot x + 68442.8194$$

$$R^2 = 1.0000$$

$$\text{BEC} = 0.599 \text{ ppb}$$

$$\text{LoD} = 0.0067 \text{ ppb}$$

205TI (KED)

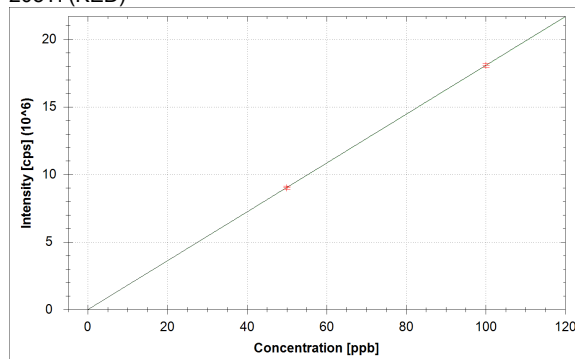

$$f(x) = 180719.5098 \cdot x + 34.5487$$

$$R^2 = 1.0000$$

$$\text{BEC} = 0.000 \text{ ppb}$$

$$\text{LoD} = 0.0005 \text{ ppb}$$

208Pb (KED)

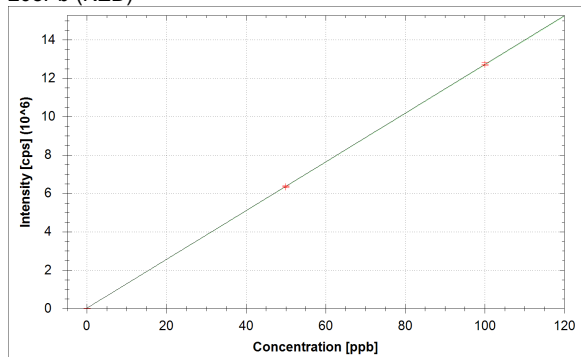

$$f(x) = 126909.3270 \cdot x + 22489.4599$$

$$R^2 = 1.0000$$

$$\text{BEC} = 0.177 \text{ ppb}$$

$$\text{LoD} = 0.0116 \text{ ppb}$$

232Th (KED)

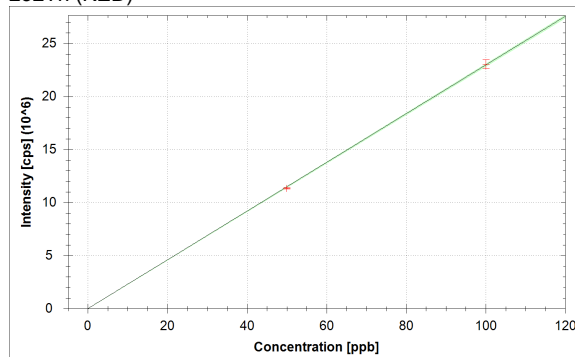

$$f(x) = 229678.6753 \cdot x + 347.8497$$

$$R^2 = 0.9999$$

$$\text{BEC} = 0.002 \text{ ppb}$$

$$\text{LoD} = 0.0008 \text{ ppb}$$

238U (KED)

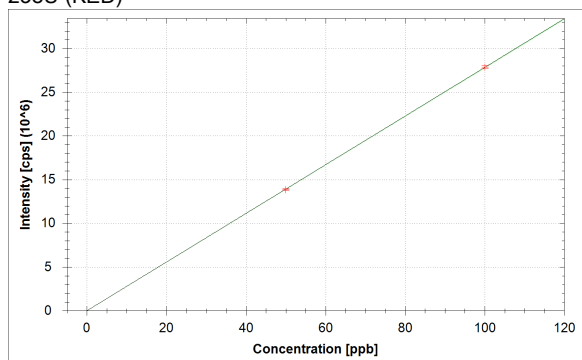

$$f(x) = 278346.9802 \cdot x + 120.5050$$

$$R^2 = 1.0000$$

$$\text{BEC} = 0.000 \text{ ppb}$$

$$\text{LoD} = 0.0009 \text{ ppb}$$

**Standards:**

Analysis Index: 3  
 Analysis Name: 0+20  
 Analysis Type: STD  
 Analysis Started at: 9/7/2021 3:30:42 PM  
 Standard (Stock): std0  
 Standard DF: 1

| Category    | Concentration average | Concentration RSD | Standard Concentration |
|-------------|-----------------------|-------------------|------------------------|
| 6Li (KED)   | 100.306 %             |                   |                        |
| 9Be (KED)   | 0.000 ppb             | 1.7 %             | 0.000 ppb              |
| 11B (KED)   | 0.000 ppb             | 0.1 %             | 0.000 ppb              |
| 24Mg (KED)  | 0.000 ppb             | 0.1 %             | 0.000 ppb              |
| 27Al (KED)  | 0.000 ppb             | 0.2 %             | 0.000 ppb              |
| 45Sc (KED)  | 103.057 %             |                   |                        |
| 51V (KED)   | 0.000 ppb             | 0.2 %             | 0.000 ppb              |
| 52Cr (KED)  | 0.000 ppb             | 0.1 %             | 0.000 ppb              |
| 55Mn (KED)  | 0.000 ppb             | 0.2 %             | 0.000 ppb              |
| 56Fe (KED)  | 0.000 ppb             | 0.1 %             | 0.000 ppb              |
| 58Ni (KED)  | 0.000 ppb             | 0.1 %             | 0.000 ppb              |
| 59Co (KED)  | 0.000 ppb             | 0.2 %             | 0.000 ppb              |
| 63Cu (KED)  | 0.000 ppb             | 0.0 %             | 0.000 ppb              |
| 64Zn (KED)  | 0.000 ppb             | 0.0 %             | 0.000 ppb              |
| 69Ga (KED)  | 0.000 ppb             | 0.2 %             | 0.000 ppb              |
| 75As (KED)  | 0.000 ppb             | 1.1 %             | 0.000 ppb              |
| 80Se (KED)  | 0.000 ppb             | 0.1 %             | 0.000 ppb              |
| 85Rb (KED)  | 0.000 ppb             | 0.2 %             | 0.000 ppb              |
| 88Sr (KED)  | 0.000 ppb             | 0.0 %             | 0.000 ppb              |
| 89Y (KED)   | 102.986 %             |                   |                        |
| 107Ag (KED) | 0.000 ppb             | 0.4 %             | 0.000 ppb              |
| 114Cd (KED) | 0.000 ppb             | 0.2 %             | 0.000 ppb              |
| 115In (KED) | 101.524 %             |                   |                        |
| 133Cs (KED) | 0.000 ppb             | 0.3 %             | 0.000 ppb              |
| 138Ba (KED) | 0.000 ppb             | 0.1 %             | 0.000 ppb              |
| 139La (KED) | 0.000 ppb             | 0.1 %             | 0.000 ppb              |
| 140Ce (KED) | 0.000 ppb             | 0.1 %             | 0.000 ppb              |
| 141Pr (KED) | 0.000 ppb             | 0.2 %             | 0.000 ppb              |
| 142Nd (KED) | 0.000 ppb             | 0.3 %             | 0.000 ppb              |
| 152Sm (KED) | 0.000 ppb             | 0.8 %             | 0.000 ppb              |
| 153Eu (KED) | 0.000 ppb             | 0.3 %             | 0.000 ppb              |
| 158Gd (KED) | 0.000 ppb             | 0.2 %             | 0.000 ppb              |
| 159Tb (KED) | 102.738 %             |                   |                        |
| 164Dy (KED) | 0.000 ppb             | 0.1 %             | 0.000 ppb              |
| 166Er (KED) | 0.000 ppb             | 0.1 %             | 0.000 ppb              |
| 169Tm (KED) | 0.000 ppb             | 0.0 %             | 0.000 ppb              |
| 174Yb (KED) | 0.000 ppb             | 0.2 %             | 0.000 ppb              |
| 175Lu (KED) | 0.000 ppb             | 0.0 %             | 0.000 ppb              |
| 205Tl (KED) | 0.000 ppb             | 0.1 %             | 0.000 ppb              |
| 208Pb (KED) | 0.000 ppb             | 0.0 %             | 0.000 ppb              |
| 209Bi (KED) | 99.685 %              |                   |                        |
| 232Th (KED) | 0.000 ppb             | 0.1 %             | 0.000 ppb              |
| 238U (KED)  | 0.000 ppb             | 0.2 %             | 0.000 ppb              |

**Standards:**

Analysis Index: 4  
 Analysis Name: 50+20  
 Analysis Type: STD  
 Analysis Started at: 9/7/2021 3:34:13 PM  
 Standard (Stock): std1  
 Standard DF: 1

| Category    | Concentration average | Concentration RSD | Standard Concentration |
|-------------|-----------------------|-------------------|------------------------|
| 6Li (KED)   | 98.472 %              |                   |                        |
| 9Be (KED)   | 50.758 ppb            | 3.8 %             | 50.000 ppb             |
| 11B (KED)   | 51.164 ppb            | 5.0 %             | 50.000 ppb             |
| 24Mg (KED)  | 49.474 ppb            | 4.6 %             | 50.000 ppb             |
| 27Al (KED)  | 47.915 ppb            | 3.1 %             | 50.000 ppb             |
| 45Sc (KED)  | 105.985 %             |                   |                        |
| 51V (KED)   | 50.477 ppb            | 0.3 %             | 50.000 ppb             |
| 52Cr (KED)  | 50.475 ppb            | 0.9 %             | 50.000 ppb             |
| 55Mn (KED)  | 50.290 ppb            | 1.2 %             | 50.000 ppb             |
| 56Fe (KED)  | 50.520 ppb            | 1.5 %             | 50.000 ppb             |
| 58Ni (KED)  | 51.281 ppb            | 1.3 %             | 50.000 ppb             |
| 59Co (KED)  | 50.835 ppb            | 2.3 %             | 50.000 ppb             |
| 63Cu (KED)  | 51.080 ppb            | 0.6 %             | 50.000 ppb             |
| 64Zn (KED)  | 51.073 ppb            | 0.3 %             | 50.000 ppb             |
| 69Ga (KED)  | 50.440 ppb            | 1.3 %             | 50.000 ppb             |
| 75As (KED)  | 50.484 ppb            | 1.8 %             | 50.000 ppb             |
| 80Se (KED)  | 50.328 ppb            | 1.6 %             | 50.000 ppb             |
| 85Rb (KED)  | 49.919 ppb            | 0.7 %             | 50.000 ppb             |
| 88Sr (KED)  | 49.862 ppb            | 0.3 %             | 50.000 ppb             |
| 89Y (KED)   | 108.379 %             |                   |                        |
| 107Ag (KED) | 51.683 ppb            | 1.8 %             | 50.000 ppb             |
| 114Cd (KED) | 50.957 ppb            | 0.1 %             | 50.000 ppb             |
| 115In (KED) | 105.895 %             |                   |                        |
| 133Cs (KED) | 50.636 ppb            | 1.5 %             | 50.000 ppb             |
| 138Ba (KED) | 51.073 ppb            | 1.5 %             | 50.000 ppb             |
| 139La (KED) | 51.568 ppb            | 1.1 %             | 50.000 ppb             |
| 140Ce (KED) | 51.030 ppb            | 1.0 %             | 50.000 ppb             |
| 141Pr (KED) | 50.702 ppb            | 1.8 %             | 50.000 ppb             |
| 142Nd (KED) | 51.081 ppb            | 1.6 %             | 50.000 ppb             |
| 152Sm (KED) | 50.976 ppb            | 1.3 %             | 50.000 ppb             |
| 153Eu (KED) | 52.159 ppb            | 0.9 %             | 50.000 ppb             |
| 158Gd (KED) | 51.557 ppb            | 0.6 %             | 50.000 ppb             |
| 159Tb (KED) | 105.682 %             |                   |                        |
| 164Dy (KED) | 51.696 ppb            | 1.5 %             | 50.000 ppb             |
| 166Er (KED) | 52.140 ppb            | 1.5 %             | 50.000 ppb             |
| 169Tm (KED) | 51.232 ppb            | 0.4 %             | 50.000 ppb             |
| 174Yb (KED) | 51.742 ppb            | 0.5 %             | 50.000 ppb             |
| 175Lu (KED) | 50.505 ppb            | 2.0 %             | 50.000 ppb             |
| 205Tl (KED) | 49.897 ppb            | 1.2 %             | 50.000 ppb             |
| 208Pb (KED) | 49.788 ppb            | 0.7 %             | 50.000 ppb             |
| 209Bi (KED) | 103.709 %             |                   |                        |
| 232Th (KED) | 49.382 ppb            | 0.6 %             | 50.000 ppb             |
| 238U (KED)  | 49.737 ppb            | 0.6 %             | 50.000 ppb             |

**Standards:**

Analysis Index: 5  
 Analysis Name: 100+20  
 Analysis Type: STD  
 Analysis Started at: 9/7/2021 3:37:35 PM  
 Standard (Stock): std2  
 Standard DF: 1

| Category    | Concentration average | Concentration RSD | Standard Concentration |
|-------------|-----------------------|-------------------|------------------------|
| 6Li (KED)   | 96.128 %              |                   |                        |
| 9Be (KED)   | 99.621 ppb            | 2.1 %             | 100.000 ppb            |
| 11B (KED)   | 99.418 ppb            | 4.7 %             | 100.000 ppb            |
| 24Mg (KED)  | 100.263 ppb           | 3.1 %             | 100.000 ppb            |
| 27Al (KED)  | 101.043 ppb           | 3.8 %             | 100.000 ppb            |
| 45Sc (KED)  | 103.861 %             |                   |                        |
| 51V (KED)   | 99.762 ppb            | 0.8 %             | 100.000 ppb            |
| 52Cr (KED)  | 99.762 ppb            | 1.0 %             | 100.000 ppb            |
| 55Mn (KED)  | 99.855 ppb            | 1.9 %             | 100.000 ppb            |
| 56Fe (KED)  | 99.740 ppb            | 1.7 %             | 100.000 ppb            |
| 58Ni (KED)  | 99.359 ppb            | 1.0 %             | 100.000 ppb            |
| 59Co (KED)  | 99.582 ppb            | 1.3 %             | 100.000 ppb            |
| 63Cu (KED)  | 99.460 ppb            | 0.8 %             | 100.000 ppb            |
| 64Zn (KED)  | 99.463 ppb            | 1.0 %             | 100.000 ppb            |
| 69Ga (KED)  | 99.780 ppb            | 1.0 %             | 100.000 ppb            |
| 75As (KED)  | 99.758 ppb            | 1.2 %             | 100.000 ppb            |
| 80Se (KED)  | 99.836 ppb            | 2.6 %             | 100.000 ppb            |
| 85Rb (KED)  | 100.040 ppb           | 1.7 %             | 100.000 ppb            |
| 88Sr (KED)  | 100.069 ppb           | 0.8 %             | 100.000 ppb            |
| 89Y (KED)   | 106.155 %             |                   |                        |
| 107Ag (KED) | 99.158 ppb            | 0.0 %             | 100.000 ppb            |
| 114Cd (KED) | 99.522 ppb            | 1.1 %             | 100.000 ppb            |
| 115In (KED) | 104.882 %             |                   |                        |
| 133Cs (KED) | 99.682 ppb            | 0.5 %             | 100.000 ppb            |
| 138Ba (KED) | 99.464 ppb            | 1.6 %             | 100.000 ppb            |
| 139La (KED) | 99.216 ppb            | 1.8 %             | 100.000 ppb            |
| 140Ce (KED) | 99.485 ppb            | 2.1 %             | 100.000 ppb            |
| 141Pr (KED) | 99.649 ppb            | 0.7 %             | 100.000 ppb            |
| 142Nd (KED) | 99.460 ppb            | 0.8 %             | 100.000 ppb            |
| 152Sm (KED) | 99.512 ppb            | 1.3 %             | 100.000 ppb            |
| 153Eu (KED) | 98.921 ppb            | 0.2 %             | 100.000 ppb            |
| 158Gd (KED) | 99.222 ppb            | 2.3 %             | 100.000 ppb            |
| 159Tb (KED) | 105.873 %             |                   |                        |
| 164Dy (KED) | 99.152 ppb            | 1.1 %             | 100.000 ppb            |
| 166Er (KED) | 98.930 ppb            | 0.9 %             | 100.000 ppb            |
| 169Tm (KED) | 99.384 ppb            | 1.8 %             | 100.000 ppb            |
| 174Yb (KED) | 99.129 ppb            | 1.4 %             | 100.000 ppb            |
| 175Lu (KED) | 99.748 ppb            | 0.1 %             | 100.000 ppb            |
| 205Tl (KED) | 100.051 ppb           | 0.8 %             | 100.000 ppb            |
| 208Pb (KED) | 100.106 ppb           | 0.6 %             | 100.000 ppb            |
| 209Bi (KED) | 101.444 %             |                   |                        |
| 232Th (KED) | 100.309 ppb           | 1.9 %             | 100.000 ppb            |
| 238U (KED)  | 100.132 ppb           | 0.6 %             | 100.000 ppb            |

## Sample List Summary:

Instrument ID: iCAP Q

| Index: | Label:        | Main<br>Runs: | Survey<br>Runs: | Start Time:         | User name:                    |
|--------|---------------|---------------|-----------------|---------------------|-------------------------------|
| 1      | water         | 3             | 0               | 9/7/2021 3:23:54 PM | WINDOWS-UPCI4ER\Administrator |
| 2      | blk           | 3             | 0               | 9/7/2021 3:26:53 PM | WINDOWS-UPCI4ER\Administrator |
| 3      | 0+20          | 3             | 0               | 9/7/2021 3:30:42 PM | WINDOWS-UPCI4ER\Administrator |
| 4      | 50+20         | 3             | 0               | 9/7/2021 3:34:13 PM | WINDOWS-UPCI4ER\Administrator |
| 5      | 100+20        | 3             | 0               | 9/7/2021 3:37:35 PM | WINDOWS-UPCI4ER\Administrator |
| 6      | 921171362jian | 3             | 0               | 9/7/2021 3:41:01 PM | WINDOWS-UPCI4ER\Administrator |
| 7      | 921171377jian | 3             | 0               | 9/7/2021 3:44:31 PM | WINDOWS-UPCI4ER\Administrator |
| 8      | 921144406jian | 3             | 0               | 9/7/2021 3:48:13 PM | WINDOWS-UPCI4ER\Administrator |
| 9      | 028736jian    | 3             | 0               | 9/7/2021 3:52:07 PM | WINDOWS-UPCI4ER\Administrator |
| 10     | 028733jian    | 3             | 0               | 9/7/2021 3:55:51 PM | WINDOWS-UPCI4ER\Administrator |
| 11     | 011907jian    | 3             | 0               | 9/7/2021 3:59:15 PM | WINDOWS-UPCI4ER\Administrator |
| 12     | 025899jian    | 3             | 0               | 9/7/2021 4:02:47 PM | WINDOWS-UPCI4ER\Administrator |
| 13     | 028674jian    | 3             | 0               | 9/7/2021 4:06:16 PM | WINDOWS-UPCI4ER\Administrator |
| 14     | 028732jian    | 3             | 0               | 9/7/2021 4:09:46 PM | WINDOWS-UPCI4ER\Administrator |
| 15     | 026077jian    | 3             | 0               | 9/7/2021 4:13:21 PM | WINDOWS-UPCI4ER\Administrator |
| 16     | 027060jian    | 3             | 0               | 9/7/2021 4:17:00 PM | WINDOWS-UPCI4ER\Administrator |
| 17     | 019243ti      | 3             | 0               | 9/7/2021 4:20:34 PM | WINDOWS-UPCI4ER\Administrator |
| 18     | 19000009wu    | 3             | 0               | 9/7/2021 4:24:13 PM | WINDOWS-UPCI4ER\Administrator |
| 19     | wuhao fu      | 3             | 0               | 9/7/2021 4:27:43 PM | WINDOWS-UPCI4ER\Administrator |
| 20     | wuhao ti      | 3             | 0               | 9/7/2021 4:31:19 PM | WINDOWS-UPCI4ER\Administrator |
| 21     | 19304ti       | 3             | 0               | 9/7/2021 4:34:53 PM | WINDOWS-UPCI4ER\Administrator |
| 22     | 19-1fu        | 3             | 0               | 9/7/2021 4:38:32 PM | WINDOWS-UPCI4ER\Administrator |
| 23     | 19-20fu       | 3             | 0               | 9/7/2021 4:42:04 PM | WINDOWS-UPCI4ER\Administrator |
| 24     | 19-10fu       | 3             | 0               | 9/7/2021 4:46:00 PM | WINDOWS-UPCI4ER\Administrator |
| 25     | 028729ti      | 3             | 0               | 9/7/2021 4:49:59 PM | WINDOWS-UPCI4ER\Administrator |

## Sample Summary

Instrument ID: iCAP Q

Analysis index: 1

Analysis name: water

Analysis started at: 9/7/2021 3:23:54 PM

User name: WINDOWS-UPCI4ER\Administrator

| Category    | Concentration average | Concentration RSD |
|-------------|-----------------------|-------------------|
| 6Li (KED)   | 0.000 %               |                   |
| 11B (KED)   | Infinity ppb          |                   |
| 24Mg (KED)  | Infinity ppb          |                   |
| 27Al (KED)  | 18.291 ppb            | 100.8 %           |
| 45Sc (KED)  | 0.290 %               | 21.8 %            |
| 51V (KED)   | 0.371 ppb             | 130.1 %           |
| 52Cr (KED)  | 1.171 ppb             | 69.8 %            |
| 55Mn (KED)  | 1.844 ppb             | 23.6 %            |
| 56Fe (KED)  | 10.080 ppb            | 13.9 %            |
| 58Ni (KED)  | 47.359 ppb            | 25.7 %            |
| 59Co (KED)  | 0.178 ppb             | 46.9 %            |
| 63Cu (KED)  | Infinity ppb          |                   |
| 64Zn (KED)  | Infinity ppb          |                   |
| 80Se (KED)  | Infinity ppb          |                   |
| 85Rb (KED)  | Infinity ppb          |                   |
| 88Sr (KED)  | Infinity ppb          |                   |
| 89Y (KED)   | 0.000 %               |                   |
| 114Cd (KED) | Infinity ppb          |                   |
| 115In (KED) | 0.000 %               | 86.6 %            |
| 138Ba (KED) | Infinity ppb          |                   |
| 140Ce (KED) | Infinity ppb          |                   |
| 159Tb (KED) | 0.000 %               |                   |
| 205Tl (KED) | 2.064 ppb             | 66.8 %            |
| 208Pb (KED) | 27.225 ppb            | 50.8 %            |
| 209Bi (KED) | 0.002 %               | 24.1 %            |
| 232Th (KED) | 0.190 ppb             | 174.6 %           |
| 238U (KED)  | 0.688 ppb             | 103.7 %           |

| Category    | Concentration average | Intensity average | Intensity RSD |
|-------------|-----------------------|-------------------|---------------|
| 6Li (KED)   | 0.000 %               | 0 cps             |               |
| 9Be (KED)   |                       | 0 cps             |               |
| 11B (KED)   | Infinity ppb          | 81 cps            | 22.6 %        |
| 24Mg (KED)  | Infinity ppb          | 29 cps            | 33.3 %        |
| 27Al (KED)  | 18.291 ppb            | 3 cps             | 100.0 %       |
| 45Sc (KED)  | 0.290 %               | 70 cps            | 21.8 %        |
| 51V (KED)   | 0.371 ppb             | 4 cps             | 114.6 %       |
| 52Cr (KED)  | 1.171 ppb             | 24 cps            | 55.1 %        |
| 55Mn (KED)  | 1.844 ppb             | 18 cps            | 10.8 %        |
| 56Fe (KED)  | 10.080 ppb            | 202 cps           | 9.1 %         |
| 58Ni (KED)  | 47.359 ppb            | 1,239 cps         | 9.3 %         |
| 59Co (KED)  | 0.178 ppb             | 8 cps             | 24.7 %        |
| 63Cu (KED)  | Infinity ppb          | 250 cps           | 9.6 %         |
| 64Zn (KED)  | Infinity ppb          | 152 cps           | 7.7 %         |
| 69Ga (KED)  |                       | 2 cps             | 173.2 %       |
| 75As (KED)  |                       | 2 cps             | 86.6 %        |
| 80Se (KED)  | Infinity ppb          | 312 cps           | 8.6 %         |
| 85Rb (KED)  | Infinity ppb          | 8 cps             | 65.5 %        |
| 88Sr (KED)  | Infinity ppb          | 10 cps            | 66.7 %        |
| 89Y (KED)   | 0.000 %               | 0 cps             |               |
| 107Ag (KED) |                       | 1 cps             | 173.2 %       |

| Category    | Concentration average | Intensity average | Intensity RSD |
|-------------|-----------------------|-------------------|---------------|
| 114Cd (KED) | Infinity ppb          | 3 cps             | 100.0 %       |
| 115In (KED) | 0.000 %               | 2 cps             | 86.6 %        |
| 133Cs (KED) |                       | 0 cps             |               |
| 138Ba (KED) | Infinity ppb          | 89 cps            | 21.7 %        |
| 139La (KED) |                       | 3 cps             | 173.2 %       |
| 140Ce (KED) | Infinity ppb          | 3 cps             | 0.0 %         |
| 141Pr (KED) |                       | 2 cps             | 86.6 %        |
| 142Nd (KED) |                       | 2 cps             | 173.2 %       |
| 152Sm (KED) |                       | 0 cps             |               |
| 153Eu (KED) |                       | 0 cps             |               |
| 158Gd (KED) |                       | 0 cps             |               |
| 159Tb (KED) | 0.000 %               | 0 cps             |               |
| 164Dy (KED) |                       | 0 cps             |               |
| 166Er (KED) |                       | 2 cps             | 173.2 %       |
| 169Tm (KED) |                       | 0 cps             |               |
| 174Yb (KED) |                       | 0 cps             |               |
| 175Lu (KED) |                       | 0 cps             |               |
| 205Tl (KED) | 2.064 ppb             | 7 cps             | 50.0 %        |
| 208Pb (KED) | 27.225 ppb            | 64 cps            | 29.9 %        |
| 209Bi (KED) | 0.002 %               | 71 cps            | 24.1 %        |
| 232Th (KED) | 0.190 ppb             | 1 cps             | 173.2 %       |
| 238U (KED)  | 0.688 ppb             | 4 cps             | 114.6 %       |

## Sample Summary

Instrument ID: iCAP Q

Analysis index: 2

Analysis name: blk

Analysis started at: 9/7/2021 3:26:53 PM

User name: WINDOWS-UPCI4ER\Administrator

| Category    | Concentration average | Concentration RSD |
|-------------|-----------------------|-------------------|
| 6Li (KED)   | 100.000 %             |                   |
| 9Be (KED)   | -0.011 ppb            | 0.0 %             |
| 11B (KED)   | -0.995 ppb            | 61.5 %            |
| 24Mg (KED)  | -0.010 ppb            | 922.2 %           |
| 27Al (KED)  | -0.094 ppb            | 146.5 %           |
| 45Sc (KED)  | 100.000 %             |                   |
| 51V (KED)   | 0.000 ppb             | 191.4 %           |
| 52Cr (KED)  | 0.000 ppb             | 1,294.8 %         |
| 55Mn (KED)  | -0.012 ppb            | 33.5 %            |
| 56Fe (KED)  | -0.017 ppb            | 218.4 %           |
| 58Ni (KED)  | 0.014 ppb             | 61.9 %            |
| 59Co (KED)  | 0.000 ppb             | 1,098.5 %         |
| 63Cu (KED)  | 0.005 ppb             | 80.3 %            |
| 64Zn (KED)  | 0.036 ppb             | 52.4 %            |
| 69Ga (KED)  | -0.001 ppb            | 139.2 %           |
| 75As (KED)  | 0.009 ppb             | 116.1 %           |
| 80Se (KED)  | 0.137 ppb             | 237.8 %           |
| 85Rb (KED)  | -0.002 ppb            | 588.2 %           |
| 88Sr (KED)  | 0.000 ppb             | 858.6 %           |
| 89Y (KED)   | 100.000 %             |                   |
| 107Ag (KED) | 0.000 ppb             | 34.4 %            |
| 114Cd (KED) | -0.001 ppb            | 69.0 %            |
| 115In (KED) | 100.000 %             |                   |
| 133Cs (KED) | 0.000 ppb             | 54.8 %            |
| 138Ba (KED) | 0.003 ppb             | 79.4 %            |
| 139La (KED) | 0.000 ppb             | 273.7 %           |
| 140Ce (KED) | 0.000 ppb             | 13.5 %            |
| 141Pr (KED) | 0.000 ppb             | 744.9 %           |
| 142Nd (KED) | 0.000 ppb             | 68.2 %            |
| 152Sm (KED) | 0.000 ppb             | 601.4 %           |
| 153Eu (KED) | 0.000 ppb             | 46.4 %            |
| 158Gd (KED) | 0.000 ppb             | 1,928.2 %         |
| 159Tb (KED) | 100.000 %             |                   |
| 164Dy (KED) | 0.000 ppb             | 121.0 %           |
| 166Er (KED) | 0.000 ppb             | 180.3 %           |
| 169Tm (KED) | 0.000 ppb             | 133.7 %           |
| 174Yb (KED) | 0.000 ppb             | 254.3 %           |
| 175Lu (KED) | 0.095 ppb             | 2.4 %             |
| 205Tl (KED) | 0.000 ppb             | 432.7 %           |
| 208Pb (KED) | -0.006 ppb            | 60.1 %            |
| 209Bi (KED) | 100.000 %             |                   |
| 232Th (KED) | 0.001 ppb             | 31.0 %            |
| 238U (KED)  | 0.000 ppb             | 106.6 %           |

| Category   | Concentration average | Intensity average | Intensity RSD |
|------------|-----------------------|-------------------|---------------|
| 6Li (KED)  | 100.000 %             | 2,181 cps         | 3.9 %         |
| 9Be (KED)  | -0.011 ppb            | 0 cps             |               |
| 11B (KED)  | -0.995 ppb            | 439 cps           | 8.3 %         |
| 24Mg (KED) | -0.010 ppb            | 297 cps           | 13.2 %        |
| 27Al (KED) | -0.094 ppb            | 68 cps            | 12.4 %        |

| Category    | Concentration average | Intensity average | Intensity RSD |
|-------------|-----------------------|-------------------|---------------|
| 45Sc (KED)  | 100.000 %             | 24,109 cps        | 0.9 %         |
| 51V (KED)   | 0.000 ppb             | 6 cps             | 69.3 %        |
| 52Cr (KED)  | 0.000 ppb             | 104 cps           | 22.6 %        |
| 55Mn (KED)  | -0.012 ppb            | 84 cps            | 14.9 %        |
| 56Fe (KED)  | -0.017 ppb            | 3,462 cps         | 7.9 %         |
| 58Ni (KED)  | 0.014 ppb             | 1,540 cps         | 5.4 %         |
| 59Co (KED)  | 0.000 ppb             | 163 cps           | 7.1 %         |
| 63Cu (KED)  | 0.005 ppb             | 1,243 cps         | 1.5 %         |
| 64Zn (KED)  | 0.036 ppb             | 1,627 cps         | 1.1 %         |
| 69Ga (KED)  | -0.001 ppb            | 62 cps            | 8.2 %         |
| 75As (KED)  | 0.009 ppb             | 11 cps            | 69.3 %        |
| 80Se (KED)  | 0.137 ppb             | 332 cps           | 22.6 %        |
| 85Rb (KED)  | -0.002 ppb            | 36 cps            | 75.8 %        |
| 88Sr (KED)  | 0.000 ppb             | 139 cps           | 11.8 %        |
| 89Y (KED)   | 100.000 %             | 237,870 cps       | 2.5 %         |
| 107Ag (KED) | 0.000 ppb             | 19 cps            | 20.4 %        |
| 114Cd (KED) | -0.001 ppb            | 109 cps           | 9.4 %         |
| 115In (KED) | 100.000 %             | 509,129 cps       | 0.8 %         |
| 133Cs (KED) | 0.000 ppb             | 30 cps            | 0.0 %         |
| 138Ba (KED) | 0.003 ppb             | 1,571 cps         | 3.5 %         |
| 139La (KED) | 0.000 ppb             | 109 cps           | 23.4 %        |
| 140Ce (KED) | 0.000 ppb             | 393 cps           | 0.8 %         |
| 141Pr (KED) | 0.000 ppb             | 41 cps            | 40.0 %        |
| 142Nd (KED) | 0.000 ppb             | 92 cps            | 9.1 %         |
| 152Sm (KED) | 0.000 ppb             | 13 cps            | 66.1 %        |
| 153Eu (KED) | 0.000 ppb             | 9 cps             | 21.7 %        |
| 158Gd (KED) | 0.000 ppb             | 17 cps            | 52.9 %        |
| 159Tb (KED) | 100.000 %             | 3,343,206 cps     | 0.3 %         |
| 164Dy (KED) | 0.000 ppb             | 16 cps            | 89.2 %        |
| 166Er (KED) | 0.000 ppb             | 378 cps           | 12.5 %        |
| 169Tm (KED) | 0.000 ppb             | 29 cps            | 43.7 %        |
| 174Yb (KED) | 0.000 ppb             | 39 cps            | 57.1 %        |
| 175Lu (KED) | 0.095 ppb             | 79,252 cps        | 0.3 %         |
| 205Tl (KED) | 0.000 ppb             | 41 cps            | 69.0 %        |
| 208Pb (KED) | -0.006 ppb            | 21,672 cps        | 2.7 %         |
| 209Bi (KED) | 100.000 %             | 3,570,445 cps     | 1.1 %         |
| 232Th (KED) | 0.001 ppb             | 540 cps           | 12.0 %        |
| 238U (KED)  | 0.000 ppb             | 199 cps           | 41.9 %        |

## Sample Summary

Instrument ID: iCAP Q

Analysis index: 3

Analysis name: 0+20

Analysis started at: 9/7/2021 3:30:42 PM

User name: WINDOWS-UPCI4ER\Administrator

| Category    | Concentration average | Concentration RSD |
|-------------|-----------------------|-------------------|
| 6Li (KED)   | 100.306 %             |                   |
| 9Be (KED)   | 0.000 ppb             | 1.7 %             |
| 11B (KED)   | 0.000 ppb             | 0.1 %             |
| 24Mg (KED)  | 0.000 ppb             | 0.1 %             |
| 27Al (KED)  | 0.000 ppb             | 0.2 %             |
| 45Sc (KED)  | 103.057 %             |                   |
| 51V (KED)   | 0.000 ppb             | 0.2 %             |
| 52Cr (KED)  | 0.000 ppb             | 0.1 %             |
| 55Mn (KED)  | 0.000 ppb             | 0.2 %             |
| 56Fe (KED)  | 0.000 ppb             | 0.1 %             |
| 58Ni (KED)  | 0.000 ppb             | 0.1 %             |
| 59Co (KED)  | 0.000 ppb             | 0.2 %             |
| 63Cu (KED)  | 0.000 ppb             | 0.0 %             |
| 64Zn (KED)  | 0.000 ppb             | 0.0 %             |
| 69Ga (KED)  | 0.000 ppb             | 0.2 %             |
| 75As (KED)  | 0.000 ppb             | 1.1 %             |
| 80Se (KED)  | 0.000 ppb             | 0.1 %             |
| 85Rb (KED)  | 0.000 ppb             | 0.2 %             |
| 88Sr (KED)  | 0.000 ppb             | 0.0 %             |
| 89Y (KED)   | 102.986 %             |                   |
| 107Ag (KED) | 0.000 ppb             | 0.4 %             |
| 114Cd (KED) | 0.000 ppb             | 0.2 %             |
| 115In (KED) | 101.524 %             |                   |
| 133Cs (KED) | 0.000 ppb             | 0.3 %             |
| 138Ba (KED) | 0.000 ppb             | 0.1 %             |
| 139La (KED) | 0.000 ppb             | 0.1 %             |
| 140Ce (KED) | 0.000 ppb             | 0.1 %             |
| 141Pr (KED) | 0.000 ppb             | 0.2 %             |
| 142Nd (KED) | 0.000 ppb             | 0.3 %             |
| 152Sm (KED) | 0.000 ppb             | 0.8 %             |
| 153Eu (KED) | 0.000 ppb             | 0.3 %             |
| 158Gd (KED) | 0.000 ppb             | 0.2 %             |
| 159Tb (KED) | 102.738 %             |                   |
| 164Dy (KED) | 0.000 ppb             | 0.1 %             |
| 166Er (KED) | 0.000 ppb             | 0.1 %             |
| 169Tm (KED) | 0.000 ppb             | 0.0 %             |
| 174Yb (KED) | 0.000 ppb             | 0.2 %             |
| 175Lu (KED) | 0.000 ppb             | 0.0 %             |
| 205Tl (KED) | 0.000 ppb             | 0.1 %             |
| 208Pb (KED) | 0.000 ppb             | 0.0 %             |
| 209Bi (KED) | 99.685 %              |                   |
| 232Th (KED) | 0.000 ppb             | 0.1 %             |
| 238U (KED)  | 0.000 ppb             | 0.2 %             |

| Category   | Concentration average | Intensity average | Intensity RSD |
|------------|-----------------------|-------------------|---------------|
| 6Li (KED)  | 100.306 %             | 2,188 cps         | 1.3 %         |
| 9Be (KED)  | 0.000 ppb             | 1 cps             | 173.2 %       |
| 11B (KED)  | 0.000 ppb             | 490 cps           | 8.8 %         |
| 24Mg (KED) | 0.000 ppb             | 300 cps           | 12.2 %        |
| 27Al (KED) | 0.000 ppb             | 77 cps            | 26.4 %        |

| Category    | Concentration average | Intensity average | Intensity RSD |
|-------------|-----------------------|-------------------|---------------|
| 45Sc (KED)  | 103.057 %             | 24,846 cps        | 3.6 %         |
| 51V (KED)   | 0.000 ppb             | 8 cps             | 24.7 %        |
| 52Cr (KED)  | 0.000 ppb             | 106 cps           | 1.8 %         |
| 55Mn (KED)  | 0.000 ppb             | 128 cps           | 19.6 %        |
| 56Fe (KED)  | 0.000 ppb             | 3,676 cps         | 11.7 %        |
| 58Ni (KED)  | 0.000 ppb             | 1,448 cps         | 5.8 %         |
| 59Co (KED)  | 0.000 ppb             | 167 cps           | 22.3 %        |
| 63Cu (KED)  | 0.000 ppb             | 1,220 cps         | 3.7 %         |
| 64Zn (KED)  | 0.000 ppb             | 1,573 cps         | 1.3 %         |
| 69Ga (KED)  | 0.000 ppb             | 67 cps            | 17.3 %        |
| 75As (KED)  | 0.000 ppb             | 4 cps             | 114.6 %       |
| 80Se (KED)  | 0.000 ppb             | 311 cps           | 12.9 %        |
| 85Rb (KED)  | 0.000 ppb             | 41 cps            | 24.8 %        |
| 88Sr (KED)  | 0.000 ppb             | 144 cps           | 5.8 %         |
| 89Y (KED)   | 102.986 %             | 244,972 cps       | 1.6 %         |
| 107Ag (KED) | 0.000 ppb             | 31 cps            | 37.6 %        |
| 114Cd (KED) | 0.000 ppb             | 127 cps           | 21.5 %        |
| 115In (KED) | 101.524 %             | 516,890 cps       | 1.6 %         |
| 133Cs (KED) | 0.000 ppb             | 30 cps            | 29.4 %        |
| 138Ba (KED) | 0.000 ppb             | 1,538 cps         | 4.5 %         |
| 139La (KED) | 0.000 ppb             | 102 cps           | 5.0 %         |
| 140Ce (KED) | 0.000 ppb             | 423 cps           | 8.7 %         |
| 141Pr (KED) | 0.000 ppb             | 40 cps            | 22.0 %        |
| 142Nd (KED) | 0.000 ppb             | 82 cps            | 29.3 %        |
| 152Sm (KED) | 0.000 ppb             | 12 cps            | 78.7 %        |
| 153Eu (KED) | 0.000 ppb             | 13 cps            | 25.0 %        |
| 158Gd (KED) | 0.000 ppb             | 17 cps            | 20.0 %        |
| 159Tb (KED) | 102.738 %             | 3,434,741 cps     | 0.7 %         |
| 164Dy (KED) | 0.000 ppb             | 28 cps            | 6.9 %         |
| 166Er (KED) | 0.000 ppb             | 414 cps           | 11.4 %        |
| 169Tm (KED) | 0.000 ppb             | 20 cps            | 0.0 %         |
| 174Yb (KED) | 0.000 ppb             | 49 cps            | 20.8 %        |
| 175Lu (KED) | 0.000 ppb             | 70,303 cps        | 4.1 %         |
| 205Tl (KED) | 0.000 ppb             | 34 cps            | 11.2 %        |
| 208Pb (KED) | 0.000 ppb             | 22,418 cps        | 1.3 %         |
| 209Bi (KED) | 99.685 %              | 3,559,212 cps     | 0.7 %         |
| 232Th (KED) | 0.000 ppb             | 347 cps           | 5.8 %         |
| 238U (KED)  | 0.000 ppb             | 120 cps           | 22.2 %        |

## Sample Summary

Instrument ID: iCAP Q

Analysis index: 4

Analysis name: 50+20

Analysis started at: 9/7/2021 3:34:13 PM

User name: WINDOWS-UPCI4ER\Administrator

| Category    | Concentration average | Concentration RSD |
|-------------|-----------------------|-------------------|
| 6Li (KED)   | 98.472 %              |                   |
| 9Be (KED)   | 50.758 ppb            | 3.8 %             |
| 11B (KED)   | 51.164 ppb            | 5.0 %             |
| 24Mg (KED)  | 49.474 ppb            | 4.6 %             |
| 27Al (KED)  | 47.915 ppb            | 3.1 %             |
| 45Sc (KED)  | 105.985 %             |                   |
| 51V (KED)   | 50.477 ppb            | 0.3 %             |
| 52Cr (KED)  | 50.475 ppb            | 0.9 %             |
| 55Mn (KED)  | 50.290 ppb            | 1.2 %             |
| 56Fe (KED)  | 50.520 ppb            | 1.5 %             |
| 58Ni (KED)  | 51.281 ppb            | 1.3 %             |
| 59Co (KED)  | 50.835 ppb            | 2.3 %             |
| 63Cu (KED)  | 51.080 ppb            | 0.6 %             |
| 64Zn (KED)  | 51.073 ppb            | 0.3 %             |
| 69Ga (KED)  | 50.440 ppb            | 1.3 %             |
| 75As (KED)  | 50.484 ppb            | 1.8 %             |
| 80Se (KED)  | 50.328 ppb            | 1.6 %             |
| 85Rb (KED)  | 49.919 ppb            | 0.7 %             |
| 88Sr (KED)  | 49.862 ppb            | 0.3 %             |
| 89Y (KED)   | 108.379 %             |                   |
| 107Ag (KED) | 51.683 ppb            | 1.8 %             |
| 114Cd (KED) | 50.957 ppb            | 0.1 %             |
| 115In (KED) | 105.895 %             |                   |
| 133Cs (KED) | 50.636 ppb            | 1.5 %             |
| 138Ba (KED) | 51.073 ppb            | 1.5 %             |
| 139La (KED) | 51.568 ppb            | 1.1 %             |
| 140Ce (KED) | 51.030 ppb            | 1.0 %             |
| 141Pr (KED) | 50.702 ppb            | 1.8 %             |
| 142Nd (KED) | 51.081 ppb            | 1.6 %             |
| 152Sm (KED) | 50.976 ppb            | 1.3 %             |
| 153Eu (KED) | 52.159 ppb            | 0.9 %             |
| 158Gd (KED) | 51.557 ppb            | 0.6 %             |
| 159Tb (KED) | 105.682 %             |                   |
| 164Dy (KED) | 51.696 ppb            | 1.5 %             |
| 166Er (KED) | 52.140 ppb            | 1.5 %             |
| 169Tm (KED) | 51.232 ppb            | 0.4 %             |
| 174Yb (KED) | 51.742 ppb            | 0.5 %             |
| 175Lu (KED) | 50.505 ppb            | 2.0 %             |
| 205Tl (KED) | 49.897 ppb            | 1.2 %             |
| 208Pb (KED) | 49.788 ppb            | 0.7 %             |
| 209Bi (KED) | 103.709 %             |                   |
| 232Th (KED) | 49.382 ppb            | 0.6 %             |
| 238U (KED)  | 49.737 ppb            | 0.6 %             |

| Category   | Concentration average | Intensity average | Intensity RSD |
|------------|-----------------------|-------------------|---------------|
| 6Li (KED)  | 98.472 %              | 2,148 cps         | 3.1 %         |
| 9Be (KED)  | 50.758 ppb            | 5,118 cps         | 0.9 %         |
| 11B (KED)  | 51.164 ppb            | 3,001 cps         | 1.5 %         |
| 24Mg (KED) | 49.474 ppb            | 15,869 cps        | 2.6 %         |
| 27Al (KED) | 47.915 ppb            | 3,416 cps         | 2.4 %         |

| Category    | Concentration average | Intensity average | Intensity RSD |
|-------------|-----------------------|-------------------|---------------|
| 45Sc (KED)  | 105.985 %             | 25,552 cps        | 1.0 %         |
| 51V (KED)   | 50.477 ppb            | 247,724 cps       | 0.9 %         |
| 52Cr (KED)  | 50.475 ppb            | 400,889 cps       | 1.6 %         |
| 55Mn (KED)  | 50.290 ppb            | 179,229 cps       | 1.2 %         |
| 56Fe (KED)  | 50.520 ppb            | 361,707 cps       | 0.7 %         |
| 58Ni (KED)  | 51.281 ppb            | 508,161 cps       | 0.6 %         |
| 59Co (KED)  | 50.835 ppb            | 811,706 cps       | 1.4 %         |
| 63Cu (KED)  | 51.080 ppb            | 642,410 cps       | 0.5 %         |
| 64Zn (KED)  | 51.073 ppb            | 154,235 cps       | 0.1 %         |
| 69Ga (KED)  | 50.440 ppb            | 176,171 cps       | 1.2 %         |
| 75As (KED)  | 50.484 ppb            | 42,202 cps        | 1.7 %         |
| 80Se (KED)  | 50.328 ppb            | 12,379 cps        | 1.6 %         |
| 85Rb (KED)  | 49.919 ppb            | 158,124 cps       | 0.4 %         |
| 88Sr (KED)  | 49.862 ppb            | 223,951 cps       | 0.5 %         |
| 89Y (KED)   | 108.379 %             | 257,801 cps       | 0.3 %         |
| 107Ag (KED) | 51.683 ppb            | 2,108,976 cps     | 1.3 %         |
| 114Cd (KED) | 50.957 ppb            | 711,028 cps       | 0.6 %         |
| 115In (KED) | 105.895 %             | 539,140 cps       | 0.7 %         |
| 133Cs (KED) | 50.636 ppb            | 930,405 cps       | 0.8 %         |
| 138Ba (KED) | 51.073 ppb            | 1,380,378 cps     | 1.1 %         |
| 139La (KED) | 51.568 ppb            | 3,021,963 cps     | 0.7 %         |
| 140Ce (KED) | 51.030 ppb            | 4,155,470 cps     | 0.6 %         |
| 141Pr (KED) | 50.702 ppb            | 4,264,369 cps     | 1.6 %         |
| 142Nd (KED) | 51.081 ppb            | 1,766,936 cps     | 1.3 %         |
| 152Sm (KED) | 50.976 ppb            | 1,737,589 cps     | 0.8 %         |
| 153Eu (KED) | 52.159 ppb            | 3,473,728 cps     | 1.2 %         |
| 158Gd (KED) | 51.557 ppb            | 2,603,617 cps     | 0.7 %         |
| 159Tb (KED) | 105.682 %             | 3,533,172 cps     | 0.5 %         |
| 164Dy (KED) | 51.696 ppb            | 2,826,376 cps     | 1.1 %         |
| 166Er (KED) | 52.140 ppb            | 3,526,697 cps     | 1.2 %         |
| 169Tm (KED) | 51.232 ppb            | 11,652,387 cps    | 0.8 %         |
| 174Yb (KED) | 51.742 ppb            | 4,414,375 cps     | 1.0 %         |
| 175Lu (KED) | 50.505 ppb            | 6,169,703 cps     | 2.1 %         |
| 205Tl (KED) | 49.897 ppb            | 9,351,425 cps     | 1.0 %         |
| 208Pb (KED) | 49.788 ppb            | 6,575,874 cps     | 0.4 %         |
| 209Bi (KED) | 103.709 %             | 3,702,856 cps     | 1.1 %         |
| 232Th (KED) | 49.382 ppb            | 11,762,766 cps    | 1.1 %         |
| 238U (KED)  | 49.737 ppb            | 14,357,933 cps    | 1.5 %         |

## Sample Summary

Instrument ID: iCAP Q

Analysis index: 5

Analysis name: 100+20

Analysis started at: 9/7/2021 3:37:35 PM

User name: WINDOWS-UPCI4ER\Administrator

| Category    | Concentration average | Concentration RSD |
|-------------|-----------------------|-------------------|
| 6Li (KED)   | 96.128 %              |                   |
| 9Be (KED)   | 99.621 ppb            | 2.1 %             |
| 11B (KED)   | 99.418 ppb            | 4.7 %             |
| 24Mg (KED)  | 100.263 ppb           | 3.1 %             |
| 27Al (KED)  | 101.043 ppb           | 3.8 %             |
| 45Sc (KED)  | 103.861 %             |                   |
| 51V (KED)   | 99.762 ppb            | 0.8 %             |
| 52Cr (KED)  | 99.762 ppb            | 1.0 %             |
| 55Mn (KED)  | 99.855 ppb            | 1.9 %             |
| 56Fe (KED)  | 99.740 ppb            | 1.7 %             |
| 58Ni (KED)  | 99.359 ppb            | 1.0 %             |
| 59Co (KED)  | 99.582 ppb            | 1.3 %             |
| 63Cu (KED)  | 99.460 ppb            | 0.8 %             |
| 64Zn (KED)  | 99.463 ppb            | 1.0 %             |
| 69Ga (KED)  | 99.780 ppb            | 1.0 %             |
| 75As (KED)  | 99.758 ppb            | 1.2 %             |
| 80Se (KED)  | 99.836 ppb            | 2.6 %             |
| 85Rb (KED)  | 100.040 ppb           | 1.7 %             |
| 88Sr (KED)  | 100.069 ppb           | 0.8 %             |
| 89Y (KED)   | 106.155 %             |                   |
| 107Ag (KED) | 99.158 ppb            | 0.0 %             |
| 114Cd (KED) | 99.522 ppb            | 1.1 %             |
| 115In (KED) | 104.882 %             |                   |
| 133Cs (KED) | 99.682 ppb            | 0.5 %             |
| 138Ba (KED) | 99.464 ppb            | 1.6 %             |
| 139La (KED) | 99.216 ppb            | 1.8 %             |
| 140Ce (KED) | 99.485 ppb            | 2.1 %             |
| 141Pr (KED) | 99.649 ppb            | 0.7 %             |
| 142Nd (KED) | 99.460 ppb            | 0.8 %             |
| 152Sm (KED) | 99.512 ppb            | 1.3 %             |
| 153Eu (KED) | 98.921 ppb            | 0.2 %             |
| 158Gd (KED) | 99.222 ppb            | 2.3 %             |
| 159Tb (KED) | 105.873 %             |                   |
| 164Dy (KED) | 99.152 ppb            | 1.1 %             |
| 166Er (KED) | 98.930 ppb            | 0.9 %             |
| 169Tm (KED) | 99.384 ppb            | 1.8 %             |
| 174Yb (KED) | 99.129 ppb            | 1.4 %             |
| 175Lu (KED) | 99.748 ppb            | 0.1 %             |
| 205Tl (KED) | 100.051 ppb           | 0.8 %             |
| 208Pb (KED) | 100.106 ppb           | 0.6 %             |
| 209Bi (KED) | 101.444 %             |                   |
| 232Th (KED) | 100.309 ppb           | 1.9 %             |
| 238U (KED)  | 100.132 ppb           | 0.6 %             |

| Category   | Concentration average | Intensity average | Intensity RSD |
|------------|-----------------------|-------------------|---------------|
| 6Li (KED)  | 96.128 %              | 2,097 cps         | 2.7 %         |
| 9Be (KED)  | 99.621 ppb            | 9,808 cps         | 0.6 %         |
| 11B (KED)  | 99.418 ppb            | 5,251 cps         | 1.5 %         |
| 24Mg (KED) | 100.263 ppb           | 31,107 cps        | 0.9 %         |
| 27Al (KED) | 101.043 ppb           | 6,974 cps         | 3.2 %         |

| Category    | Concentration average | Intensity average | Intensity RSD |
|-------------|-----------------------|-------------------|---------------|
| 45Sc (KED)  | 103.861 %             | 25,040 cps        | 0.6 %         |
| 51V (KED)   | 99.762 ppb            | 479,770 cps       | 0.2 %         |
| 52Cr (KED)  | 99.762 ppb            | 776,311 cps       | 0.4 %         |
| 55Mn (KED)  | 99.855 ppb            | 348,604 cps       | 1.3 %         |
| 56Fe (KED)  | 99.740 ppb            | 696,226 cps       | 1.5 %         |
| 58Ni (KED)  | 99.359 ppb            | 963,545 cps       | 1.1 %         |
| 59Co (KED)  | 99.582 ppb            | 1,558,315 cps     | 1.7 %         |
| 63Cu (KED)  | 99.460 ppb            | 1,224,020 cps     | 1.1 %         |
| 64Zn (KED)  | 99.463 ppb            | 292,663 cps       | 0.7 %         |
| 69Ga (KED)  | 99.780 ppb            | 341,277 cps       | 0.7 %         |
| 75As (KED)  | 99.758 ppb            | 81,678 cps        | 0.9 %         |
| 80Se (KED)  | 99.836 ppb            | 23,737 cps        | 2.3 %         |
| 85Rb (KED)  | 100.040 ppb           | 310,334 cps       | 1.3 %         |
| 88Sr (KED)  | 100.069 ppb           | 440,071 cps       | 0.6 %         |
| 89Y (KED)   | 106.155 %             | 252,511 cps       | 0.3 %         |
| 107Ag (KED) | 99.158 ppb            | 4,007,800 cps     | 1.2 %         |
| 114Cd (KED) | 99.522 ppb            | 1,375,187 cps     | 0.7 %         |
| 115In (KED) | 104.882 %             | 533,986 cps       | 1.2 %         |
| 133Cs (KED) | 99.682 ppb            | 1,814,112 cps     | 0.8 %         |
| 138Ba (KED) | 99.464 ppb            | 2,691,337 cps     | 0.5 %         |
| 139La (KED) | 99.216 ppb            | 5,823,798 cps     | 0.5 %         |
| 140Ce (KED) | 99.485 ppb            | 8,114,090 cps     | 0.9 %         |
| 141Pr (KED) | 99.649 ppb            | 8,396,466 cps     | 1.6 %         |
| 142Nd (KED) | 99.460 ppb            | 3,446,597 cps     | 1.4 %         |
| 152Sm (KED) | 99.512 ppb            | 3,397,813 cps     | 0.6 %         |
| 153Eu (KED) | 98.921 ppb            | 6,599,753 cps     | 1.2 %         |
| 158Gd (KED) | 99.222 ppb            | 5,018,645 cps     | 0.9 %         |
| 159Tb (KED) | 105.873 %             | 3,539,536 cps     | 1.4 %         |
| 164Dy (KED) | 99.152 ppb            | 5,430,413 cps     | 0.6 %         |
| 166Er (KED) | 98.930 ppb            | 6,702,888 cps     | 0.5 %         |
| 169Tm (KED) | 99.384 ppb            | 22,640,792 cps    | 0.5 %         |
| 174Yb (KED) | 99.129 ppb            | 8,471,173 cps     | 0.1 %         |
| 175Lu (KED) | 99.748 ppb            | 12,136,447 cps    | 1.5 %         |
| 205Tl (KED) | 100.051 ppb           | 18,341,535 cps    | 0.1 %         |
| 208Pb (KED) | 100.106 ppb           | 12,910,627 cps    | 1.0 %         |
| 209Bi (KED) | 101.444 %             | 3,621,991 cps     | 0.8 %         |
| 232Th (KED) | 100.309 ppb           | 23,369,811 cps    | 1.2 %         |
| 238U (KED)  | 100.132 ppb           | 28,274,702 cps    | 1.4 %         |

## Sample Summary

Instrument ID: iCAP Q

Analysis index: 6

Analysis name: 921171362jian

Analysis started at: 9/7/2021 3:41:01 PM

User name: WINDOWS-UPCI4ER\Administrator

| Category    | Concentration average | Concentration RSD |
|-------------|-----------------------|-------------------|
| 6Li (KED)   | 116.150 %             | 5.7 %             |
| 9Be (KED)   | 0.065 ppb             | 57.8 %            |
| 11B (KED)   | -2.483 ppb            | 18.1 %            |
| 24Mg (KED)  | 445.981 ppb           | 3.4 %             |
| 27Al (KED)  | 599.443 ppb           | 1.7 %             |
| 45Sc (KED)  | 113.846 %             | 2.3 %             |
| 51V (KED)   | 0.990 ppb             | 3.6 %             |
| 52Cr (KED)  | 2.542 ppb             | 1.5 %             |
| 55Mn (KED)  | 13.453 ppb            | 2.1 %             |
| 56Fe (KED)  | 519.318 ppb           | 1.1 %             |
| 58Ni (KED)  | 2.381 ppb             | 2.2 %             |
| 59Co (KED)  | 0.300 ppb             | 3.7 %             |
| 63Cu (KED)  | 4.495 ppb             | 1.6 %             |
| 64Zn (KED)  | 156.615 ppb           | 1.9 %             |
| 69Ga (KED)  | 1.410 ppb             | 3.3 %             |
| 75As (KED)  | 0.592 ppb             | 2.7 %             |
| 80Se (KED)  | 0.580 ppb             | 35.1 %            |
| 85Rb (KED)  | 1.989 ppb             | 1.5 %             |
| 88Sr (KED)  | 6.158 ppb             | 1.9 %             |
| 89Y (KED)   | 111.303 %             | 1.3 %             |
| 107Ag (KED) | 0.083 ppb             | 8.8 %             |
| 114Cd (KED) | 0.070 ppb             | 7.0 %             |
| 115In (KED) | 101.415 %             | 1.5 %             |
| 133Cs (KED) | 0.153 ppb             | 1.9 %             |
| 138Ba (KED) | 5.303 ppb             | 2.2 %             |
| 139La (KED) | 0.435 ppb             | 0.7 %             |
| 140Ce (KED) | 0.936 ppb             | 1.5 %             |
| 141Pr (KED) | 0.111 ppb             | 4.3 %             |
| 142Nd (KED) | 0.563 ppb             | 2.0 %             |
| 152Sm (KED) | 0.173 ppb             | 96.9 %            |
| 153Eu (KED) | 0.286 ppb             | 161.4 %           |
| 158Gd (KED) | 0.299 ppb             | 131.7 %           |
| 159Tb (KED) | 105.862 %             | 0.4 %             |
| 164Dy (KED) | 0.234 ppb             | 135.1 %           |
| 166Er (KED) | 0.196 ppb             | 147.9 %           |
| 169Tm (KED) | 0.134 ppb             | 163.2 %           |
| 174Yb (KED) | 0.130 ppb             | 140.2 %           |
| 175Lu (KED) | -0.114 ppb            | 163.0 %           |
| 205Tl (KED) | 0.113 ppb             | 141.5 %           |
| 208Pb (KED) | 0.770 ppb             | 14.6 %            |
| 209Bi (KED) | 89.595 %              | 1.6 %             |
| 232Th (KED) | 0.343 ppb             | 42.3 %            |
| 238U (KED)  | 0.109 ppb             | 79.5 %            |

| Category   | Concentration average | Intensity average | Intensity RSD |
|------------|-----------------------|-------------------|---------------|
| 6Li (KED)  | 116.150 %             | 2,534 cps         | 5.7 %         |
| 9Be (KED)  | 0.065 ppb             | 9 cps             | 43.3 %        |
| 11B (KED)  | -2.483 ppb            | 422 cps           | 0.5 %         |
| 24Mg (KED) | 445.981 ppb           | 165,909 cps       | 3.9 %         |
| 27Al (KED) | 599.443 ppb           | 44,943 cps        | 2.9 %         |

| Category    | Concentration average | Intensity average | Intensity RSD |
|-------------|-----------------------|-------------------|---------------|
| 45Sc (KED)  | 113.846 %             | 27,447 cps        | 2.3 %         |
| 51V (KED)   | 0.990 ppb             | 5,227 cps         | 1.2 %         |
| 52Cr (KED)  | 2.542 ppb             | 21,797 cps        | 3.5 %         |
| 55Mn (KED)  | 13.453 ppb            | 51,622 cps        | 4.4 %         |
| 56Fe (KED)  | 519.318 ppb           | 3,956,641 cps     | 2.7 %         |
| 58Ni (KED)  | 2.381 ppb             | 26,863 cps        | 1.3 %         |
| 59Co (KED)  | 0.300 ppb             | 5,323 cps         | 1.7 %         |
| 63Cu (KED)  | 4.495 ppb             | 59,258 cps        | 2.4 %         |
| 64Zn (KED)  | 156.615 ppb           | 482,205 cps       | 2.2 %         |
| 69Ga (KED)  | 1.410 ppb             | 5,128 cps         | 3.6 %         |
| 75As (KED)  | 0.592 ppb             | 513 cps           | 3.4 %         |
| 80Se (KED)  | 0.580 ppb             | 479 cps           | 11.3 %        |
| 85Rb (KED)  | 1.989 ppb             | 6,513 cps         | 1.6 %         |
| 88Sr (KED)  | 6.158 ppb             | 28,546 cps        | 3.2 %         |
| 89Y (KED)   | 111.303 %             | 264,756 cps       | 1.3 %         |
| 107Ag (KED) | 0.083 ppb             | 3,255 cps         | 7.3 %         |
| 114Cd (KED) | 0.070 ppb             | 1,064 cps         | 5.8 %         |
| 115In (KED) | 101.415 %             | 516,334 cps       | 1.5 %         |
| 133Cs (KED) | 0.153 ppb             | 2,717 cps         | 1.7 %         |
| 138Ba (KED) | 5.303 ppb             | 144,998 cps       | 1.8 %         |
| 139La (KED) | 0.435 ppb             | 25,660 cps        | 1.1 %         |
| 140Ce (KED) | 0.936 ppb             | 76,749 cps        | 1.4 %         |
| 141Pr (KED) | 0.111 ppb             | 9,387 cps         | 4.2 %         |
| 142Nd (KED) | 0.563 ppb             | 19,602 cps        | 2.3 %         |
| 152Sm (KED) | 0.173 ppb             | 5,901 cps         | 96.6 %        |
| 153Eu (KED) | 0.286 ppb             | 19,082 cps        | 161.2 %       |
| 158Gd (KED) | 0.299 ppb             | 15,128 cps        | 131.5 %       |
| 159Tb (KED) | 105.862 %             | 3,539,192 cps     | 0.4 %         |
| 164Dy (KED) | 0.234 ppb             | 12,857 cps        | 134.8 %       |
| 166Er (KED) | 0.196 ppb             | 13,685 cps        | 143.2 %       |
| 169Tm (KED) | 0.134 ppb             | 30,634 cps        | 163.0 %       |
| 174Yb (KED) | 0.130 ppb             | 11,125 cps        | 139.6 %       |
| 175Lu (KED) | -0.114 ppb            | 58,712 cps        | 38.0 %        |
| 205Tl (KED) | 0.113 ppb             | 18,550 cps        | 142.0 %       |
| 208Pb (KED) | 0.770 ppb             | 107,794 cps       | 13.5 %        |
| 209Bi (KED) | 89.595 %              | 3,198,947 cps     | 1.6 %         |
| 232Th (KED) | 0.343 ppb             | 71,216 cps        | 43.8 %        |
| 238U (KED)  | 0.109 ppb             | 27,432 cps        | 80.7 %        |

## Sample Summary

Instrument ID: iCAP Q

Analysis index: 7

Analysis name: 921171377jian

Analysis started at: 9/7/2021 3:44:31 PM

User name: WINDOWS-UPCI4ER\Administrator

| Category    | Concentration average | Concentration RSD |
|-------------|-----------------------|-------------------|
| 6Li (KED)   | 120.379 %             | 2.3 %             |
| 9Be (KED)   | 0.035 ppb             | 119.0 %           |
| 11B (KED)   | -1.446 ppb            | 86.2 %            |
| 24Mg (KED)  | 618.272 ppb           | 3.0 %             |
| 27Al (KED)  | 1,175.538 ppb         | 3.1 %             |
| 45Sc (KED)  | 122.645 %             | 1.1 %             |
| 51V (KED)   | 1.868 ppb             | 3.5 %             |
| 52Cr (KED)  | 3.386 ppb             | 1.9 %             |
| 55Mn (KED)  | 22.428 ppb            | 1.2 %             |
| 56Fe (KED)  | 904.592 ppb           | 0.9 %             |
| 58Ni (KED)  | 3.738 ppb             | 2.0 %             |
| 59Co (KED)  | 0.433 ppb             | 1.2 %             |
| 63Cu (KED)  | 7.043 ppb             | 2.6 %             |
| 64Zn (KED)  | 168.154 ppb           | 2.1 %             |
| 69Ga (KED)  | 2.306 ppb             | 1.5 %             |
| 75As (KED)  | 0.763 ppb             | 2.6 %             |
| 80Se (KED)  | 1.108 ppb             | 21.0 %            |
| 85Rb (KED)  | 2.677 ppb             | 2.9 %             |
| 88Sr (KED)  | 9.652 ppb             | 2.5 %             |
| 89Y (KED)   | 113.542 %             | 1.8 %             |
| 107Ag (KED) | 0.072 ppb             | 7.7 %             |
| 114Cd (KED) | 0.108 ppb             | 9.3 %             |
| 115In (KED) | 99.344 %              | 0.6 %             |
| 133Cs (KED) | 0.270 ppb             | 4.4 %             |
| 138Ba (KED) | 8.076 ppb             | 1.3 %             |
| 139La (KED) | 0.849 ppb             | 2.4 %             |
| 140Ce (KED) | 1.775 ppb             | 1.1 %             |
| 141Pr (KED) | 0.206 ppb             | 1.8 %             |
| 142Nd (KED) | 1.084 ppb             | 1.7 %             |
| 152Sm (KED) | 0.154 ppb             | 5.4 %             |
| 153Eu (KED) | 0.040 ppb             | 6.3 %             |
| 158Gd (KED) | 0.143 ppb             | 3.9 %             |
| 159Tb (KED) | 100.934 %             | 0.3 %             |
| 164Dy (KED) | 0.101 ppb             | 6.8 %             |
| 166Er (KED) | 0.058 ppb             | 4.4 %             |
| 169Tm (KED) | 0.018 ppb             | 35.5 %            |
| 174Yb (KED) | 0.047 ppb             | 10.2 %            |
| 175Lu (KED) | -0.261 ppb            | 5.5 %             |
| 205Tl (KED) | 0.031 ppb             | 24.3 %            |
| 208Pb (KED) | 1.084 ppb             | 2.5 %             |
| 209Bi (KED) | 85.077 %              | 1.1 %             |
| 232Th (KED) | 0.335 ppb             | 2.5 %             |
| 238U (KED)  | 0.097 ppb             | 4.3 %             |

| Category   | Concentration average | Intensity average | Intensity RSD |
|------------|-----------------------|-------------------|---------------|
| 6Li (KED)  | 120.379 %             | 2,626 cps         | 2.3 %         |
| 9Be (KED)  | 0.035 ppb             | 6 cps             | 91.7 %        |
| 11B (KED)  | -1.446 ppb            | 500 cps           | 12.7 %        |
| 24Mg (KED) | 618.272 ppb           | 238,368 cps       | 0.7 %         |
| 27Al (KED) | 1,175.538 ppb         | 94,840 cps        | 2.0 %         |

| Category    | Concentration average | Intensity average | Intensity RSD |
|-------------|-----------------------|-------------------|---------------|
| 45Sc (KED)  | 122.645 %             | 29,568 cps        | 1.1 %         |
| 51V (KED)   | 1.868 ppb             | 10,616 cps        | 2.4 %         |
| 52Cr (KED)  | 3.386 ppb             | 31,233 cps        | 1.8 %         |
| 55Mn (KED)  | 22.428 ppb            | 92,579 cps        | 1.0 %         |
| 56Fe (KED)  | 904.592 ppb           | 7,420,941 cps     | 0.6 %         |
| 58Ni (KED)  | 3.738 ppb             | 44,459 cps        | 1.1 %         |
| 59Co (KED)  | 0.433 ppb             | 8,203 cps         | 1.2 %         |
| 63Cu (KED)  | 7.043 ppb             | 93,933 cps        | 1.2 %         |
| 64Zn (KED)  | 168.154 ppb           | 527,895 cps       | 0.5 %         |
| 69Ga (KED)  | 2.306 ppb             | 8,507 cps         | 1.8 %         |
| 75As (KED)  | 0.763 ppb             | 673 cps           | 3.0 %         |
| 80Se (KED)  | 1.108 ppb             | 620 cps           | 7.6 %         |
| 85Rb (KED)  | 2.677 ppb             | 8,924 cps         | 1.3 %         |
| 88Sr (KED)  | 9.652 ppb             | 45,539 cps        | 2.2 %         |
| 89Y (KED)   | 113.542 %             | 270,081 cps       | 1.8 %         |
| 107Ag (KED) | 0.072 ppb             | 2,769 cps         | 7.0 %         |
| 114Cd (KED) | 0.108 ppb             | 1,540 cps         | 7.9 %         |
| 115In (KED) | 99.344 %              | 505,788 cps       | 0.6 %         |
| 133Cs (KED) | 0.270 ppb             | 4,681 cps         | 4.3 %         |
| 138Ba (KED) | 8.076 ppb             | 209,749 cps       | 1.4 %         |
| 139La (KED) | 0.849 ppb             | 47,593 cps        | 2.5 %         |
| 140Ce (KED) | 1.775 ppb             | 138,460 cps       | 1.4 %         |
| 141Pr (KED) | 0.206 ppb             | 16,627 cps        | 2.0 %         |
| 142Nd (KED) | 1.084 ppb             | 35,893 cps        | 1.4 %         |
| 152Sm (KED) | 0.154 ppb             | 5,034 cps         | 5.7 %         |
| 153Eu (KED) | 0.040 ppb             | 2,557 cps         | 6.6 %         |
| 158Gd (KED) | 0.143 ppb             | 6,910 cps         | 4.2 %         |
| 159Tb (KED) | 100.934 %             | 3,374,416 cps     | 0.3 %         |
| 164Dy (KED) | 0.101 ppb             | 5,311 cps         | 7.0 %         |
| 166Er (KED) | 0.058 ppb             | 4,156 cps         | 4.3 %         |
| 169Tm (KED) | 0.018 ppb             | 3,904 cps         | 35.6 %        |
| 174Yb (KED) | 0.047 ppb             | 3,886 cps         | 10.4 %        |
| 175Lu (KED) | -0.261 ppb            | 39,028 cps        | 4.5 %         |
| 205Tl (KED) | 0.031 ppb             | 4,772 cps         | 24.8 %        |
| 208Pb (KED) | 1.084 ppb             | 136,146 cps       | 1.4 %         |
| 209Bi (KED) | 85.077 %              | 3,037,638 cps     | 1.1 %         |
| 232Th (KED) | 0.335 ppb             | 65,717 cps        | 3.3 %         |
| 238U (KED)  | 0.097 ppb             | 23,030 cps        | 4.9 %         |

## Sample Summary

Instrument ID: iCAP Q

Analysis index: 8

Analysis name: 921144406jian

Analysis started at: 9/7/2021 3:48:13 PM

User name: WINDOWS-UPCI4ER\Administrator

| Category    | Concentration average | Concentration RSD |
|-------------|-----------------------|-------------------|
| 6Li (KED)   | 127.563 %             | 0.4 %             |
| 9Be (KED)   | -0.002 ppb            | 699.0 %           |
| 11B (KED)   | -2.523 ppb            | 12.2 %            |
| 24Mg (KED)  | 306.921 ppb           | 1.2 %             |
| 27Al (KED)  | 458.137 ppb           | 0.5 %             |
| 45Sc (KED)  | 123.657 %             | 0.8 %             |
| 51V (KED)   | 0.797 ppb             | 3.2 %             |
| 52Cr (KED)  | 3.238 ppb             | 2.1 %             |
| 55Mn (KED)  | 9.769 ppb             | 1.1 %             |
| 56Fe (KED)  | 419.461 ppb           | 0.6 %             |
| 58Ni (KED)  | 1.953 ppb             | 0.5 %             |
| 59Co (KED)  | 0.199 ppb             | 4.0 %             |
| 63Cu (KED)  | 4.340 ppb             | 0.2 %             |
| 64Zn (KED)  | 173.630 ppb           | 0.2 %             |
| 69Ga (KED)  | 1.243 ppb             | 1.2 %             |
| 75As (KED)  | 0.843 ppb             | 8.1 %             |
| 80Se (KED)  | 0.772 ppb             | 26.2 %            |
| 85Rb (KED)  | 1.696 ppb             | 5.8 %             |
| 88Sr (KED)  | 5.027 ppb             | 0.9 %             |
| 89Y (KED)   | 111.536 %             | 0.9 %             |
| 107Ag (KED) | 0.072 ppb             | 1.5 %             |
| 114Cd (KED) | 0.053 ppb             | 5.0 %             |
| 115In (KED) | 99.993 %              | 1.5 %             |
| 133Cs (KED) | 0.113 ppb             | 4.3 %             |
| 138Ba (KED) | 4.254 ppb             | 0.5 %             |
| 139La (KED) | 0.390 ppb             | 1.2 %             |
| 140Ce (KED) | 0.830 ppb             | 0.6 %             |
| 141Pr (KED) | 0.091 ppb             | 3.8 %             |
| 142Nd (KED) | 0.502 ppb             | 1.2 %             |
| 152Sm (KED) | 0.064 ppb             | 6.4 %             |
| 153Eu (KED) | 0.019 ppb             | 46.3 %            |
| 158Gd (KED) | 0.075 ppb             | 40.5 %            |
| 159Tb (KED) | 101.112 %             | 1.0 %             |
| 164Dy (KED) | 0.060 ppb             | 58.2 %            |
| 166Er (KED) | 0.033 ppb             | 70.1 %            |
| 169Tm (KED) | 0.015 ppb             | 141.0 %           |
| 174Yb (KED) | 0.028 ppb             | 68.4 %            |
| 175Lu (KED) | -0.310 ppb            | 7.2 %             |
| 205Tl (KED) | 0.018 ppb             | 82.8 %            |
| 208Pb (KED) | 0.697 ppb             | 2.9 %             |
| 209Bi (KED) | 82.827 %              | 0.2 %             |
| 232Th (KED) | 0.154 ppb             | 7.1 %             |
| 238U (KED)  | 0.043 ppb             | 18.5 %            |

| Category   | Concentration average | Intensity average | Intensity RSD |
|------------|-----------------------|-------------------|---------------|
| 6Li (KED)  | 127.563 %             | 2,783 cps         | 0.4 %         |
| 9Be (KED)  | -0.002 ppb            | 1 cps             | 173.2 %       |
| 11B (KED)  | -2.523 ppb            | 462 cps           | 4.3 %         |
| 24Mg (KED) | 306.921 ppb           | 125,638 cps       | 0.8 %         |
| 27Al (KED) | 458.137 ppb           | 37,331 cps        | 1.2 %         |

| Category    | Concentration average | Intensity average | Intensity RSD |
|-------------|-----------------------|-------------------|---------------|
| 45Sc (KED)  | 123.657 %             | 29,812 cps        | 0.8 %         |
| 51V (KED)   | 0.797 ppb             | 4,572 cps         | 2.6 %         |
| 52Cr (KED)  | 3.238 ppb             | 30,125 cps        | 2.2 %         |
| 55Mn (KED)  | 9.769 ppb             | 40,744 cps        | 0.7 %         |
| 56Fe (KED)  | 419.461 ppb           | 3,472,149 cps     | 1.3 %         |
| 58Ni (KED)  | 1.953 ppb             | 24,255 cps        | 1.3 %         |
| 59Co (KED)  | 0.199 ppb             | 3,907 cps         | 3.2 %         |
| 63Cu (KED)  | 4.340 ppb             | 57,386 cps        | 0.7 %         |
| 64Zn (KED)  | 173.630 ppb           | 535,522 cps       | 0.7 %         |
| 69Ga (KED)  | 1.243 ppb             | 4,540 cps         | 1.6 %         |
| 75As (KED)  | 0.843 ppb             | 730 cps           | 9.0 %         |
| 80Se (KED)  | 0.772 ppb             | 527 cps           | 8.8 %         |
| 85Rb (KED)  | 1.696 ppb             | 5,571 cps         | 5.7 %         |
| 88Sr (KED)  | 5.027 ppb             | 23,377 cps        | 0.3 %         |
| 89Y (KED)   | 111.536 %             | 265,310 cps       | 0.9 %         |
| 107Ag (KED) | 0.072 ppb             | 2,818 cps         | 0.6 %         |
| 114Cd (KED) | 0.053 ppb             | 824 cps           | 3.2 %         |
| 115In (KED) | 99.993 %              | 509,094 cps       | 1.5 %         |
| 133Cs (KED) | 0.113 ppb             | 1,991 cps         | 4.2 %         |
| 138Ba (KED) | 4.254 ppb             | 111,396 cps       | 0.5 %         |
| 139La (KED) | 0.390 ppb             | 21,962 cps        | 0.4 %         |
| 140Ce (KED) | 0.830 ppb             | 65,109 cps        | 0.7 %         |
| 141Pr (KED) | 0.091 ppb             | 7,384 cps         | 4.5 %         |
| 142Nd (KED) | 0.502 ppb             | 16,706 cps        | 0.3 %         |
| 152Sm (KED) | 0.064 ppb             | 2,091 cps         | 7.3 %         |
| 153Eu (KED) | 0.019 ppb             | 1,229 cps         | 46.8 %        |
| 158Gd (KED) | 0.075 ppb             | 3,651 cps         | 41.4 %        |
| 159Tb (KED) | 101.112 %             | 3,380,380 cps     | 1.0 %         |
| 164Dy (KED) | 0.060 ppb             | 3,193 cps         | 58.7 %        |
| 166Er (KED) | 0.033 ppb             | 2,539 cps         | 59.8 %        |
| 169Tm (KED) | 0.015 ppb             | 3,352 cps         | 140.7 %       |
| 174Yb (KED) | 0.028 ppb             | 2,381 cps         | 68.0 %        |
| 175Lu (KED) | -0.310 ppb            | 33,467 cps        | 8.7 %         |
| 205Tl (KED) | 0.018 ppb             | 2,663 cps         | 82.1 %        |
| 208Pb (KED) | 0.697 ppb             | 91,878 cps        | 2.5 %         |
| 209Bi (KED) | 82.827 %              | 2,957,300 cps     | 0.2 %         |
| 232Th (KED) | 0.154 ppb             | 29,624 cps        | 7.2 %         |
| 238U (KED)  | 0.043 ppb             | 10,026 cps        | 18.6 %        |

## Sample Summary

Instrument ID: iCAP Q

Analysis index: 9

Analysis name: 028736jian

Analysis started at: 9/7/2021 3:52:07 PM

User name: WINDOWS-UPCI4ER\Administrator

| Category    | Concentration average | Concentration RSD |
|-------------|-----------------------|-------------------|
| 6Li (KED)   | 127.563 %             | 6.4 %             |
| 9Be (KED)   | 0.083 ppb             | 12.7 %            |
| 11B (KED)   | -1.383 ppb            | 27.1 %            |
| 24Mg (KED)  | 1,124.282 ppb         | 5.3 %             |
| 27Al (KED)  | 1,039.737 ppb         | 2.5 %             |
| 45Sc (KED)  | 127.284 %             | 2.3 %             |
| 51V (KED)   | 1.843 ppb             | 0.9 %             |
| 52Cr (KED)  | 4.697 ppb             | 2.9 %             |
| 55Mn (KED)  | 25.020 ppb            | 2.9 %             |
| 56Fe (KED)  | 861.850 ppb           | 2.2 %             |
| 58Ni (KED)  | 3.985 ppb             | 0.9 %             |
| 59Co (KED)  | 0.482 ppb             | 4.0 %             |
| 63Cu (KED)  | 8.373 ppb             | 0.8 %             |
| 64Zn (KED)  | 171.926 ppb           | 0.5 %             |
| 69Ga (KED)  | 4.339 ppb             | 3.2 %             |
| 75As (KED)  | 1.050 ppb             | 7.7 %             |
| 80Se (KED)  | 0.743 ppb             | 21.4 %            |
| 85Rb (KED)  | 2.080 ppb             | 2.4 %             |
| 88Sr (KED)  | 11.704 ppb            | 1.2 %             |
| 89Y (KED)   | 111.864 %             | 0.2 %             |
| 107Ag (KED) | 0.066 ppb             | 1.5 %             |
| 114Cd (KED) | 0.044 ppb             | 10.6 %            |
| 115In (KED) | 97.667 %              | 1.2 %             |
| 133Cs (KED) | 0.198 ppb             | 6.5 %             |
| 138Ba (KED) | 14.871 ppb            | 2.1 %             |
| 139La (KED) | 0.565 ppb             | 2.6 %             |
| 140Ce (KED) | 1.227 ppb             | 3.1 %             |
| 141Pr (KED) | 0.136 ppb             | 0.5 %             |
| 142Nd (KED) | 0.758 ppb             | 2.0 %             |
| 152Sm (KED) | 0.112 ppb             | 10.1 %            |
| 153Eu (KED) | 0.030 ppb             | 36.1 %            |
| 158Gd (KED) | 0.098 ppb             | 8.6 %             |
| 159Tb (KED) | 98.530 %              | 1.8 %             |
| 164Dy (KED) | 0.069 ppb             | 4.2 %             |
| 166Er (KED) | 0.032 ppb             | 14.8 %            |
| 169Tm (KED) | 0.007 ppb             | 53.4 %            |
| 174Yb (KED) | 0.028 ppb             | 12.9 %            |
| 175Lu (KED) | -0.344 ppb            | 3.0 %             |
| 205Tl (KED) | 0.017 ppb             | 12.3 %            |
| 208Pb (KED) | 2.152 ppb             | 3.6 %             |
| 209Bi (KED) | 78.722 %              | 2.6 %             |
| 232Th (KED) | 0.247 ppb             | 0.8 %             |
| 238U (KED)  | 0.106 ppb             | 2.3 %             |

| Category   | Concentration average | Intensity average | Intensity RSD |
|------------|-----------------------|-------------------|---------------|
| 6Li (KED)  | 127.563 %             | 2,783 cps         | 6.4 %         |
| 9Be (KED)  | 0.083 ppb             | 12 cps            | 15.7 %        |
| 11B (KED)  | -1.383 ppb            | 534 cps           | 5.2 %         |
| 24Mg (KED) | 1,124.282 ppb         | 458,180 cps       | 1.1 %         |
| 27Al (KED) | 1,039.737 ppb         | 87,053 cps        | 0.2 %         |

| Category    | Concentration average | Intensity average | Intensity RSD |
|-------------|-----------------------|-------------------|---------------|
| 45Sc (KED)  | 127.284 %             | 30,687 cps        | 2.3 %         |
| 51V (KED)   | 1.843 ppb             | 10,868 cps        | 1.4 %         |
| 52Cr (KED)  | 4.697 ppb             | 44,904 cps        | 1.6 %         |
| 55Mn (KED)  | 25.020 ppb            | 107,126 cps       | 1.1 %         |
| 56Fe (KED)  | 861.850 ppb           | 7,335,883 cps     | 0.2 %         |
| 58Ni (KED)  | 3.985 ppb             | 49,075 cps        | 1.5 %         |
| 59Co (KED)  | 0.482 ppb             | 9,437 cps         | 2.2 %         |
| 63Cu (KED)  | 8.373 ppb             | 109,791 cps       | 0.7 %         |
| 64Zn (KED)  | 171.926 ppb           | 531,847 cps       | 0.5 %         |
| 69Ga (KED)  | 4.339 ppb             | 15,709 cps        | 3.3 %         |
| 75As (KED)  | 1.050 ppb             | 911 cps           | 7.9 %         |
| 80Se (KED)  | 0.743 ppb             | 521 cps           | 7.6 %         |
| 85Rb (KED)  | 2.080 ppb             | 6,843 cps         | 2.4 %         |
| 88Sr (KED)  | 11.704 ppb            | 54,377 cps        | 1.4 %         |
| 89Y (KED)   | 111.864 %             | 266,089 cps       | 0.2 %         |
| 107Ag (KED) | 0.066 ppb             | 2,499 cps         | 2.5 %         |
| 114Cd (KED) | 0.044 ppb             | 691 cps           | 7.6 %         |
| 115In (KED) | 97.667 %              | 497,248 cps       | 1.2 %         |
| 133Cs (KED) | 0.198 ppb             | 3,376 cps         | 5.3 %         |
| 138Ba (KED) | 14.871 ppb            | 375,699 cps       | 0.9 %         |
| 139La (KED) | 0.565 ppb             | 30,939 cps        | 0.8 %         |
| 140Ce (KED) | 1.227 ppb             | 93,529 cps        | 1.3 %         |
| 141Pr (KED) | 0.136 ppb             | 10,694 cps        | 2.3 %         |
| 142Nd (KED) | 0.758 ppb             | 24,526 cps        | 3.5 %         |
| 152Sm (KED) | 0.112 ppb             | 3,584 cps         | 11.9 %        |
| 153Eu (KED) | 0.030 ppb             | 1,885 cps         | 37.8 %        |
| 158Gd (KED) | 0.098 ppb             | 4,618 cps         | 10.4 %        |
| 159Tb (KED) | 98.530 %              | 3,294,075 cps     | 1.8 %         |
| 164Dy (KED) | 0.069 ppb             | 3,521 cps         | 5.9 %         |
| 166Er (KED) | 0.032 ppb             | 2,428 cps         | 14.2 %        |
| 169Tm (KED) | 0.007 ppb             | 1,467 cps         | 54.6 %        |
| 174Yb (KED) | 0.028 ppb             | 2,244 cps         | 14.5 %        |
| 175Lu (KED) | -0.344 ppb            | 28,680 cps        | 5.4 %         |
| 205Tl (KED) | 0.017 ppb             | 2,476 cps         | 12.3 %        |
| 208Pb (KED) | 2.152 ppb             | 232,558 cps       | 2.0 %         |
| 209Bi (KED) | 78.722 %              | 2,810,724 cps     | 2.6 %         |
| 232Th (KED) | 0.247 ppb             | 45,012 cps        | 2.8 %         |
| 238U (KED)  | 0.106 ppb             | 23,361 cps        | 1.5 %         |

## Sample Summary

Instrument ID: iCAP Q

Analysis index: 10

Analysis name: 028733jian

Analysis started at: 9/7/2021 3:55:51 PM

User name: WINDOWS-UPCI4ER\Administrator

| Category    | Concentration average | Concentration RSD |
|-------------|-----------------------|-------------------|
| 6Li (KED)   | 136.734 %             | 2.9 %             |
| 9Be (KED)   | 0.045 ppb             | 79.8 %            |
| 11B (KED)   | -0.499 ppb            | 231.2 %           |
| 24Mg (KED)  | 712.319 ppb           | 3.6 %             |
| 27Al (KED)  | 939.641 ppb           | 3.6 %             |
| 45Sc (KED)  | 130.268 %             | 3.4 %             |
| 51V (KED)   | 1.782 ppb             | 0.5 %             |
| 52Cr (KED)  | 4.572 ppb             | 2.4 %             |
| 55Mn (KED)  | 24.348 ppb            | 2.0 %             |
| 56Fe (KED)  | 953.315 ppb           | 1.9 %             |
| 58Ni (KED)  | 4.351 ppb             | 2.3 %             |
| 59Co (KED)  | 0.480 ppb             | 3.7 %             |
| 63Cu (KED)  | 10.826 ppb            | 3.4 %             |
| 64Zn (KED)  | 166.230 ppb           | 1.7 %             |
| 69Ga (KED)  | 2.399 ppb             | 2.0 %             |
| 75As (KED)  | 0.794 ppb             | 3.2 %             |
| 80Se (KED)  | 1.037 ppb             | 20.3 %            |
| 85Rb (KED)  | 2.272 ppb             | 2.2 %             |
| 88Sr (KED)  | 8.961 ppb             | 1.6 %             |
| 89Y (KED)   | 114.521 %             | 2.3 %             |
| 107Ag (KED) | 0.062 ppb             | 8.2 %             |
| 114Cd (KED) | 0.064 ppb             | 16.2 %            |
| 115In (KED) | 97.322 %              | 1.2 %             |
| 133Cs (KED) | 0.193 ppb             | 1.0 %             |
| 138Ba (KED) | 8.276 ppb             | 2.2 %             |
| 139La (KED) | 0.575 ppb             | 1.8 %             |
| 140Ce (KED) | 1.302 ppb             | 1.2 %             |
| 141Pr (KED) | 0.138 ppb             | 4.3 %             |
| 142Nd (KED) | 0.782 ppb             | 1.0 %             |
| 152Sm (KED) | 0.106 ppb             | 4.2 %             |
| 153Eu (KED) | 0.024 ppb             | 2.9 %             |
| 158Gd (KED) | 0.098 ppb             | 2.0 %             |
| 159Tb (KED) | 97.803 %              | 0.6 %             |
| 164Dy (KED) | 0.068 ppb             | 4.2 %             |
| 166Er (KED) | 0.033 ppb             | 7.0 %             |
| 169Tm (KED) | 0.006 ppb             | 53.6 %            |
| 174Yb (KED) | 0.028 ppb             | 20.1 %            |
| 175Lu (KED) | -0.368 ppb            | 2.1 %             |
| 205Tl (KED) | 0.022 ppb             | 14.7 %            |
| 208Pb (KED) | 1.350 ppb             | 1.4 %             |
| 209Bi (KED) | 75.969 %              | 0.5 %             |
| 232Th (KED) | 0.311 ppb             | 1.4 %             |
| 238U (KED)  | 0.097 ppb             | 0.2 %             |

| Category   | Concentration average | Intensity average | Intensity RSD |
|------------|-----------------------|-------------------|---------------|
| 6Li (KED)  | 136.734 %             | 2,983 cps         | 2.9 %         |
| 9Be (KED)  | 0.045 ppb             | 8 cps             | 65.5 %        |
| 11B (KED)  | -0.499 ppb            | 633 cps           | 11.5 %        |
| 24Mg (KED) | 712.319 ppb           | 311,807 cps       | 1.0 %         |
| 27Al (KED) | 939.641 ppb           | 80,493 cps        | 0.7 %         |

| Category    | Concentration average | Intensity average | Intensity RSD |
|-------------|-----------------------|-------------------|---------------|
| 45Sc (KED)  | 130.268 %             | 31,406 cps        | 3.4 %         |
| 51V (KED)   | 1.782 ppb             | 10,757 cps        | 3.6 %         |
| 52Cr (KED)  | 4.572 ppb             | 44,734 cps        | 1.9 %         |
| 55Mn (KED)  | 24.348 ppb            | 106,697 cps       | 1.3 %         |
| 56Fe (KED)  | 953.315 ppb           | 8,303,450 cps     | 1.5 %         |
| 58Ni (KED)  | 4.351 ppb             | 54,649 cps        | 1.7 %         |
| 59Co (KED)  | 0.480 ppb             | 9,625 cps         | 3.6 %         |
| 63Cu (KED)  | 10.826 ppb            | 144,886 cps       | 2.3 %         |
| 64Zn (KED)  | 166.230 ppb           | 526,382 cps       | 1.1 %         |
| 69Ga (KED)  | 2.399 ppb             | 8,922 cps         | 2.6 %         |
| 75As (KED)  | 0.794 ppb             | 706 cps           | 2.7 %         |
| 80Se (KED)  | 1.037 ppb             | 608 cps           | 8.7 %         |
| 85Rb (KED)  | 2.272 ppb             | 7,649 cps         | 3.9 %         |
| 88Sr (KED)  | 8.961 ppb             | 42,650 cps        | 1.0 %         |
| 89Y (KED)   | 114.521 %             | 272,410 cps       | 2.3 %         |
| 107Ag (KED) | 0.062 ppb             | 2,340 cps         | 7.1 %         |
| 114Cd (KED) | 0.064 ppb             | 941 cps           | 13.1 %        |
| 115In (KED) | 97.322 %              | 495,495 cps       | 1.2 %         |
| 133Cs (KED) | 0.193 ppb             | 3,285 cps         | 2.2 %         |
| 138Ba (KED) | 8.276 ppb             | 208,236 cps       | 1.8 %         |
| 139La (KED) | 0.575 ppb             | 31,277 cps        | 2.3 %         |
| 140Ce (KED) | 1.302 ppb             | 98,501 cps        | 1.1 %         |
| 141Pr (KED) | 0.138 ppb             | 10,748 cps        | 3.7 %         |
| 142Nd (KED) | 0.782 ppb             | 25,111 cps        | 0.8 %         |
| 152Sm (KED) | 0.106 ppb             | 3,350 cps         | 4.3 %         |
| 153Eu (KED) | 0.024 ppb             | 1,483 cps         | 3.1 %         |
| 158Gd (KED) | 0.098 ppb             | 4,589 cps         | 2.5 %         |
| 159Tb (KED) | 97.803 %              | 3,269,742 cps     | 0.6 %         |
| 164Dy (KED) | 0.068 ppb             | 3,492 cps         | 4.8 %         |
| 166Er (KED) | 0.033 ppb             | 2,432 cps         | 5.8 %         |
| 169Tm (KED) | 0.006 ppb             | 1,372 cps         | 53.3 %        |
| 174Yb (KED) | 0.028 ppb             | 2,245 cps         | 20.2 %        |
| 175Lu (KED) | -0.368 ppb            | 25,820 cps        | 3.8 %         |
| 205Tl (KED) | 0.022 ppb             | 3,060 cps         | 14.8 %        |
| 208Pb (KED) | 1.350 ppb             | 147,267 cps       | 1.1 %         |
| 209Bi (KED) | 75.969 %              | 2,712,448 cps     | 0.5 %         |
| 232Th (KED) | 0.311 ppb             | 54,527 cps        | 1.9 %         |
| 238U (KED)  | 0.097 ppb             | 20,540 cps        | 0.7 %         |

## Sample Summary

Instrument ID: iCAP Q

Analysis index: 11

Analysis name: 011907jian

Analysis started at: 9/7/2021 3:59:15 PM

User name: WINDOWS-UPCI4ER\Administrator

| Category    | Concentration average | Concentration RSD |
|-------------|-----------------------|-------------------|
| 6Li (KED)   | 133.422 %             | 5.6 %             |
| 9Be (KED)   | 0.048 ppb             | 125.4 %           |
| 11B (KED)   | -2.788 ppb            | 21.3 %            |
| 24Mg (KED)  | 673.110 ppb           | 5.0 %             |
| 27Al (KED)  | 762.676 ppb           | 0.4 %             |
| 45Sc (KED)  | 136.307 %             | 1.5 %             |
| 51V (KED)   | 1.490 ppb             | 1.4 %             |
| 52Cr (KED)  | 4.908 ppb             | 1.5 %             |
| 55Mn (KED)  | 19.035 ppb            | 1.2 %             |
| 56Fe (KED)  | 728.029 ppb           | 2.0 %             |
| 58Ni (KED)  | 3.509 ppb             | 2.2 %             |
| 59Co (KED)  | 0.365 ppb             | 1.8 %             |
| 63Cu (KED)  | 9.523 ppb             | 1.9 %             |
| 64Zn (KED)  | 168.086 ppb           | 2.5 %             |
| 69Ga (KED)  | 2.557 ppb             | 4.4 %             |
| 75As (KED)  | 0.656 ppb             | 5.1 %             |
| 80Se (KED)  | 1.076 ppb             | 23.0 %            |
| 85Rb (KED)  | 2.603 ppb             | 0.8 %             |
| 88Sr (KED)  | 7.750 ppb             | 2.2 %             |
| 89Y (KED)   | 115.638 %             | 1.3 %             |
| 107Ag (KED) | 0.093 ppb             | 5.3 %             |
| 114Cd (KED) | 0.072 ppb             | 3.0 %             |
| 115In (KED) | 97.276 %              | 1.6 %             |
| 133Cs (KED) | 0.151 ppb             | 4.7 %             |
| 138Ba (KED) | 8.523 ppb             | 2.7 %             |
| 139La (KED) | 0.527 ppb             | 4.1 %             |
| 140Ce (KED) | 1.147 ppb             | 1.2 %             |
| 141Pr (KED) | 0.121 ppb             | 2.8 %             |
| 142Nd (KED) | 0.691 ppb             | 3.9 %             |
| 152Sm (KED) | 0.092 ppb             | 5.9 %             |
| 153Eu (KED) | 0.020 ppb             | 8.6 %             |
| 158Gd (KED) | 0.085 ppb             | 2.0 %             |
| 159Tb (KED) | 95.780 %              | 2.4 %             |
| 164Dy (KED) | 0.058 ppb             | 5.5 %             |
| 166Er (KED) | 0.027 ppb             | 1.8 %             |
| 169Tm (KED) | 0.004 ppb             | 8.2 %             |
| 174Yb (KED) | 0.022 ppb             | 7.1 %             |
| 175Lu (KED) | -0.383 ppb            | 2.2 %             |
| 205Tl (KED) | 0.014 ppb             | 6.1 %             |
| 208Pb (KED) | 1.133 ppb             | 3.2 %             |
| 209Bi (KED) | 75.397 %              | 1.1 %             |
| 232Th (KED) | 0.221 ppb             | 1.0 %             |
| 238U (KED)  | 0.076 ppb             | 3.1 %             |

| Category   | Concentration average | Intensity average | Intensity RSD |
|------------|-----------------------|-------------------|---------------|
| 6Li (KED)  | 133.422 %             | 2,910 cps         | 5.6 %         |
| 9Be (KED)  | 0.048 ppb             | 8 cps             | 99.0 %        |
| 11B (KED)  | -2.788 ppb            | 464 cps           | 4.4 %         |
| 24Mg (KED) | 673.110 ppb           | 287,196 cps       | 0.7 %         |
| 27Al (KED) | 762.676 ppb           | 68,435 cps        | 1.3 %         |

| Category    | Concentration average | Intensity average | Intensity RSD |
|-------------|-----------------------|-------------------|---------------|
| 45Sc (KED)  | 136.307 %             | 32,862 cps        | 1.5 %         |
| 51V (KED)   | 1.490 ppb             | 9,417 cps         | 2.4 %         |
| 52Cr (KED)  | 4.908 ppb             | 50,250 cps        | 0.4 %         |
| 55Mn (KED)  | 19.035 ppb            | 87,347 cps        | 0.8 %         |
| 56Fe (KED)  | 728.029 ppb           | 6,637,831 cps     | 0.6 %         |
| 58Ni (KED)  | 3.509 ppb             | 46,507 cps        | 0.7 %         |
| 59Co (KED)  | 0.365 ppb             | 7,725 cps         | 0.6 %         |
| 63Cu (KED)  | 9.523 ppb             | 128,879 cps       | 0.9 %         |
| 64Zn (KED)  | 168.086 ppb           | 537,442 cps       | 1.2 %         |
| 69Ga (KED)  | 2.557 ppb             | 9,596 cps         | 3.4 %         |
| 75As (KED)  | 0.656 ppb             | 590 cps           | 6.1 %         |
| 80Se (KED)  | 1.076 ppb             | 623 cps           | 8.9 %         |
| 85Rb (KED)  | 2.603 ppb             | 8,842 cps         | 1.0 %         |
| 88Sr (KED)  | 7.750 ppb             | 37,271 cps        | 1.3 %         |
| 89Y (KED)   | 115.638 %             | 275,068 cps       | 1.3 %         |
| 107Ag (KED) | 0.093 ppb             | 3,508 cps         | 5.1 %         |
| 114Cd (KED) | 0.072 ppb             | 1,049 cps         | 2.7 %         |
| 115In (KED) | 97.276 %              | 495,258 cps       | 1.6 %         |
| 133Cs (KED) | 0.151 ppb             | 2,582 cps         | 3.3 %         |
| 138Ba (KED) | 8.523 ppb             | 209,890 cps       | 1.0 %         |
| 139La (KED) | 0.527 ppb             | 28,070 cps        | 1.7 %         |
| 140Ce (KED) | 1.147 ppb             | 85,023 cps        | 1.3 %         |
| 141Pr (KED) | 0.121 ppb             | 9,253 cps         | 0.9 %         |
| 142Nd (KED) | 0.691 ppb             | 21,722 cps        | 1.6 %         |
| 152Sm (KED) | 0.092 ppb             | 2,846 cps         | 3.9 %         |
| 153Eu (KED) | 0.020 ppb             | 1,243 cps         | 6.3 %         |
| 158Gd (KED) | 0.085 ppb             | 3,902 cps         | 1.2 %         |
| 159Tb (KED) | 95.780 %              | 3,202,132 cps     | 2.4 %         |
| 164Dy (KED) | 0.058 ppb             | 2,901 cps         | 3.8 %         |
| 166Er (KED) | 0.027 ppb             | 2,034 cps         | 2.8 %         |
| 169Tm (KED) | 0.004 ppb             | 808 cps           | 7.2 %         |
| 174Yb (KED) | 0.022 ppb             | 1,741 cps         | 6.5 %         |
| 175Lu (KED) | -0.383 ppb            | 23,599 cps        | 2.4 %         |
| 205Tl (KED) | 0.014 ppb             | 1,981 cps         | 6.1 %         |
| 208Pb (KED) | 1.133 ppb             | 125,317 cps       | 1.7 %         |
| 209Bi (KED) | 75.397 %              | 2,692,025 cps     | 1.1 %         |
| 232Th (KED) | 0.221 ppb             | 38,474 cps        | 1.2 %         |
| 238U (KED)  | 0.076 ppb             | 16,098 cps        | 2.0 %         |

## Sample Summary

Instrument ID: iCAP Q

Analysis index: 12

Analysis name: 025899jian

Analysis started at: 9/7/2021 4:02:47 PM

User name: WINDOWS-UPCI4ER\Administrator

| Category    | Concentration average | Concentration RSD |
|-------------|-----------------------|-------------------|
| 6Li (KED)   | 137.396 %             | 2.8 %             |
| 9Be (KED)   | 0.013 ppb             | 178.6 %           |
| 11B (KED)   | -2.496 ppb            | 30.2 %            |
| 24Mg (KED)  | 797.559 ppb           | 3.7 %             |
| 27Al (KED)  | 705.349 ppb           | 1.1 %             |
| 45Sc (KED)  | 144.140 %             | 0.5 %             |
| 51V (KED)   | 1.387 ppb             | 2.8 %             |
| 52Cr (KED)  | 4.477 ppb             | 2.1 %             |
| 55Mn (KED)  | 19.601 ppb            | 1.0 %             |
| 56Fe (KED)  | 763.056 ppb           | 3.1 %             |
| 58Ni (KED)  | 3.473 ppb             | 2.0 %             |
| 59Co (KED)  | 0.373 ppb             | 2.1 %             |
| 63Cu (KED)  | 9.819 ppb             | 1.0 %             |
| 64Zn (KED)  | 143.449 ppb           | 1.5 %             |
| 69Ga (KED)  | 2.537 ppb             | 1.0 %             |
| 75As (KED)  | 0.797 ppb             | 8.2 %             |
| 80Se (KED)  | 0.951 ppb             | 13.0 %            |
| 85Rb (KED)  | 4.111 ppb             | 0.6 %             |
| 88Sr (KED)  | 11.706 ppb            | 1.1 %             |
| 89Y (KED)   | 118.799 %             | 2.6 %             |
| 107Ag (KED) | 0.058 ppb             | 5.3 %             |
| 114Cd (KED) | 0.076 ppb             | 5.4 %             |
| 115In (KED) | 100.365 %             | 2.4 %             |
| 133Cs (KED) | 0.158 ppb             | 4.0 %             |
| 138Ba (KED) | 8.318 ppb             | 1.6 %             |
| 139La (KED) | 0.577 ppb             | 0.8 %             |
| 140Ce (KED) | 1.276 ppb             | 0.9 %             |
| 141Pr (KED) | 0.139 ppb             | 2.6 %             |
| 142Nd (KED) | 0.752 ppb             | 2.7 %             |
| 152Sm (KED) | 0.100 ppb             | 2.9 %             |
| 153Eu (KED) | 0.021 ppb             | 2.6 %             |
| 158Gd (KED) | 0.089 ppb             | 3.3 %             |
| 159Tb (KED) | 96.644 %              | 0.5 %             |
| 164Dy (KED) | 0.062 ppb             | 3.5 %             |
| 166Er (KED) | 0.030 ppb             | 8.0 %             |
| 169Tm (KED) | 0.004 ppb             | 2.3 %             |
| 174Yb (KED) | 0.023 ppb             | 0.7 %             |
| 175Lu (KED) | -0.397 ppb            | 0.8 %             |
| 205Tl (KED) | 0.013 ppb             | 3.4 %             |
| 208Pb (KED) | 1.229 ppb             | 0.7 %             |
| 209Bi (KED) | 73.646 %              | 0.5 %             |
| 232Th (KED) | 0.236 ppb             | 3.5 %             |
| 238U (KED)  | 0.079 ppb             | 3.8 %             |

| Category   | Concentration average | Intensity average | Intensity RSD |
|------------|-----------------------|-------------------|---------------|
| 6Li (KED)  | 137.396 %             | 2,997 cps         | 2.8 %         |
| 9Be (KED)  | 0.013 ppb             | 3 cps             | 100.0 %       |
| 11B (KED)  | -2.496 ppb            | 499 cps           | 8.0 %         |
| 24Mg (KED) | 797.559 ppb           | 350,773 cps       | 1.5 %         |
| 27Al (KED) | 705.349 ppb           | 66,936 cps        | 0.9 %         |

| Category    | Concentration average | Intensity average | Intensity RSD |
|-------------|-----------------------|-------------------|---------------|
| 45Sc (KED)  | 144.140 %             | 34,751 cps        | 0.5 %         |
| 51V (KED)   | 1.387 ppb             | 9,267 cps         | 3.0 %         |
| 52Cr (KED)  | 4.477 ppb             | 48,491 cps        | 1.8 %         |
| 55Mn (KED)  | 19.601 ppb            | 95,113 cps        | 0.6 %         |
| 56Fe (KED)  | 763.056 ppb           | 7,357,926 cps     | 2.9 %         |
| 58Ni (KED)  | 3.473 ppb             | 48,699 cps        | 2.0 %         |
| 59Co (KED)  | 0.373 ppb             | 8,323 cps         | 2.0 %         |
| 63Cu (KED)  | 9.819 ppb             | 136,498 cps       | 3.0 %         |
| 64Zn (KED)  | 143.449 ppb           | 471,465 cps       | 1.7 %         |
| 69Ga (KED)  | 2.537 ppb             | 9,787 cps         | 3.0 %         |
| 75As (KED)  | 0.797 ppb             | 736 cps           | 8.9 %         |
| 80Se (KED)  | 0.951 ppb             | 608 cps           | 4.4 %         |
| 85Rb (KED)  | 4.111 ppb             | 14,319 cps        | 2.8 %         |
| 88Sr (KED)  | 11.706 ppb            | 57,749 cps        | 1.6 %         |
| 89Y (KED)   | 118.799 %             | 282,586 cps       | 2.6 %         |
| 107Ag (KED) | 0.058 ppb             | 2,267 cps         | 3.1 %         |
| 114Cd (KED) | 0.076 ppb             | 1,136 cps         | 2.5 %         |
| 115In (KED) | 100.365 %             | 510,989 cps       | 2.4 %         |
| 133Cs (KED) | 0.158 ppb             | 2,784 cps         | 2.2 %         |
| 138Ba (KED) | 8.318 ppb             | 206,810 cps       | 1.6 %         |
| 139La (KED) | 0.577 ppb             | 31,012 cps        | 1.2 %         |
| 140Ce (KED) | 1.276 ppb             | 95,385 cps        | 0.4 %         |
| 141Pr (KED) | 0.139 ppb             | 10,765 cps        | 2.7 %         |
| 142Nd (KED) | 0.752 ppb             | 23,874 cps        | 2.2 %         |
| 152Sm (KED) | 0.100 ppb             | 3,124 cps         | 3.4 %         |
| 153Eu (KED) | 0.021 ppb             | 1,308 cps         | 2.1 %         |
| 158Gd (KED) | 0.089 ppb             | 4,113 cps         | 3.0 %         |
| 159Tb (KED) | 96.644 %              | 3,231,006 cps     | 0.5 %         |
| 164Dy (KED) | 0.062 ppb             | 3,116 cps         | 4.0 %         |
| 166Er (KED) | 0.030 ppb             | 2,216 cps         | 6.4 %         |
| 169Tm (KED) | 0.004 ppb             | 843 cps           | 1.8 %         |
| 174Yb (KED) | 0.023 ppb             | 1,815 cps         | 0.4 %         |
| 175Lu (KED) | -0.397 ppb            | 22,349 cps        | 1.0 %         |
| 205Tl (KED) | 0.013 ppb             | 1,811 cps         | 3.7 %         |
| 208Pb (KED) | 1.229 ppb             | 131,399 cps       | 0.8 %         |
| 209Bi (KED) | 73.646 %              | 2,629,476 cps     | 0.5 %         |
| 232Th (KED) | 0.236 ppb             | 40,140 cps        | 3.6 %         |
| 238U (KED)  | 0.079 ppb             | 16,372 cps        | 4.1 %         |

## Sample Summary

Instrument ID: iCAP Q

Analysis index: 13

Analysis name: 028674jian

Analysis started at: 9/7/2021 4:06:16 PM

User name: WINDOWS-UPCI4ER\Administrator

| Category    | Concentration average | Concentration RSD |
|-------------|-----------------------|-------------------|
| 6Li (KED)   | 138.517 %             | 3.4 %             |
| 9Be (KED)   | -0.003 ppb            | 417.9 %           |
| 11B (KED)   | -4.427 ppb            | 6.0 %             |
| 24Mg (KED)  | 372.636 ppb           | 4.7 %             |
| 27Al (KED)  | 531.759 ppb           | 3.0 %             |
| 45Sc (KED)  | 143.253 %             | 3.3 %             |
| 51V (KED)   | 0.947 ppb             | 0.9 %             |
| 52Cr (KED)  | 5.154 ppb             | 2.5 %             |
| 55Mn (KED)  | 12.108 ppb            | 2.9 %             |
| 56Fe (KED)  | 500.407 ppb           | 2.6 %             |
| 58Ni (KED)  | 2.503 ppb             | 2.4 %             |
| 59Co (KED)  | 0.245 ppb             | 1.7 %             |
| 63Cu (KED)  | 7.711 ppb             | 3.0 %             |
| 64Zn (KED)  | 146.501 ppb           | 1.9 %             |
| 69Ga (KED)  | 2.190 ppb             | 2.4 %             |
| 75As (KED)  | 0.935 ppb             | 4.5 %             |
| 80Se (KED)  | 0.896 ppb             | 19.3 %            |
| 85Rb (KED)  | 1.540 ppb             | 5.2 %             |
| 88Sr (KED)  | 5.529 ppb             | 3.1 %             |
| 89Y (KED)   | 117.826 %             | 2.0 %             |
| 107Ag (KED) | 0.066 ppb             | 4.3 %             |
| 114Cd (KED) | 0.068 ppb             | 5.8 %             |
| 115In (KED) | 98.825 %              | 0.8 %             |
| 133Cs (KED) | 0.108 ppb             | 1.8 %             |
| 138Ba (KED) | 6.816 ppb             | 3.1 %             |
| 139La (KED) | 0.754 ppb             | 2.2 %             |
| 140Ce (KED) | 1.588 ppb             | 2.3 %             |
| 141Pr (KED) | 0.175 ppb             | 3.4 %             |
| 142Nd (KED) | 0.970 ppb             | 2.0 %             |
| 152Sm (KED) | 0.111 ppb             | 0.9 %             |
| 153Eu (KED) | 0.019 ppb             | 0.2 %             |
| 158Gd (KED) | 0.088 ppb             | 3.1 %             |
| 159Tb (KED) | 95.499 %              | 1.2 %             |
| 164Dy (KED) | 0.052 ppb             | 5.8 %             |
| 166Er (KED) | 0.021 ppb             | 1.9 %             |
| 169Tm (KED) | 0.003 ppb             | 6.5 %             |
| 174Yb (KED) | 0.018 ppb             | 3.1 %             |
| 175Lu (KED) | -0.411 ppb            | 0.7 %             |
| 205Tl (KED) | 0.011 ppb             | 4.3 %             |
| 208Pb (KED) | 1.593 ppb             | 2.7 %             |
| 209Bi (KED) | 74.935 %              | 1.6 %             |
| 232Th (KED) | 0.166 ppb             | 3.3 %             |
| 238U (KED)  | 0.050 ppb             | 3.8 %             |

| Category   | Concentration average | Intensity average | Intensity RSD |
|------------|-----------------------|-------------------|---------------|
| 6Li (KED)  | 138.517 %             | 3,021 cps         | 3.4 %         |
| 9Be (KED)  | -0.003 ppb            | 1 cps             | 173.2 %       |
| 11B (KED)  | -4.427 ppb            | 370 cps           | 6.8 %         |
| 24Mg (KED) | 372.636 ppb           | 165,377 cps       | 1.4 %         |
| 27Al (KED) | 531.759 ppb           | 50,147 cps        | 0.7 %         |

| Category    | Concentration average | Intensity average | Intensity RSD |
|-------------|-----------------------|-------------------|---------------|
| 45Sc (KED)  | 143.253 %             | 34,537 cps        | 3.3 %         |
| 51V (KED)   | 0.947 ppb             | 6,293 cps         | 3.7 %         |
| 52Cr (KED)  | 5.154 ppb             | 55,433 cps        | 1.3 %         |
| 55Mn (KED)  | 12.108 ppb            | 58,425 cps        | 0.9 %         |
| 56Fe (KED)  | 500.407 ppb           | 4,794,820 cps     | 0.8 %         |
| 58Ni (KED)  | 2.503 ppb             | 35,436 cps        | 2.1 %         |
| 59Co (KED)  | 0.245 ppb             | 5,527 cps         | 2.4 %         |
| 63Cu (KED)  | 7.711 ppb             | 106,571 cps       | 1.1 %         |
| 64Zn (KED)  | 146.501 ppb           | 477,499 cps       | 0.4 %         |
| 69Ga (KED)  | 2.190 ppb             | 8,388 cps         | 3.8 %         |
| 75As (KED)  | 0.935 ppb             | 854 cps           | 2.9 %         |
| 80Se (KED)  | 0.896 ppb             | 589 cps           | 8.5 %         |
| 85Rb (KED)  | 1.540 ppb             | 5,346 cps         | 4.6 %         |
| 88Sr (KED)  | 5.529 ppb             | 27,134 cps        | 1.8 %         |
| 89Y (KED)   | 117.826 %             | 280,272 cps       | 2.0 %         |
| 107Ag (KED) | 0.066 ppb             | 2,540 cps         | 4.4 %         |
| 114Cd (KED) | 0.068 ppb             | 1,007 cps         | 5.7 %         |
| 115In (KED) | 98.825 %              | 503,145 cps       | 0.8 %         |
| 133Cs (KED) | 0.108 ppb             | 1,883 cps         | 1.9 %         |
| 138Ba (KED) | 6.816 ppb             | 167,712 cps       | 3.4 %         |
| 139La (KED) | 0.754 ppb             | 40,009 cps        | 1.1 %         |
| 140Ce (KED) | 1.588 ppb             | 117,214 cps       | 1.7 %         |
| 141Pr (KED) | 0.175 ppb             | 13,300 cps        | 2.6 %         |
| 142Nd (KED) | 0.970 ppb             | 30,393 cps        | 2.2 %         |
| 152Sm (KED) | 0.111 ppb             | 3,432 cps         | 1.6 %         |
| 153Eu (KED) | 0.019 ppb             | 1,172 cps         | 1.3 %         |
| 158Gd (KED) | 0.088 ppb             | 4,054 cps         | 4.2 %         |
| 159Tb (KED) | 95.499 %              | 3,192,729 cps     | 1.2 %         |
| 164Dy (KED) | 0.052 ppb             | 2,576 cps         | 4.8 %         |
| 166Er (KED) | 0.021 ppb             | 1,651 cps         | 2.3 %         |
| 169Tm (KED) | 0.003 ppb             | 662 cps           | 7.6 %         |
| 174Yb (KED) | 0.018 ppb             | 1,432 cps         | 4.0 %         |
| 175Lu (KED) | -0.411 ppb            | 20,476 cps        | 1.3 %         |
| 205Tl (KED) | 0.011 ppb             | 1,485 cps         | 4.5 %         |
| 208Pb (KED) | 1.593 ppb             | 168,337 cps       | 2.8 %         |
| 209Bi (KED) | 74.935 %              | 2,675,513 cps     | 1.6 %         |
| 232Th (KED) | 0.166 ppb             | 28,745 cps        | 2.6 %         |
| 238U (KED)  | 0.050 ppb             | 10,599 cps        | 2.6 %         |

## Sample Summary

Instrument ID: iCAP Q

Analysis index: 14

Analysis name: 028732jian

Analysis started at: 9/7/2021 4:09:46 PM

User name: WINDOWS-UPCI4ER\Administrator

| Category    | Concentration average | Concentration RSD |
|-------------|-----------------------|-------------------|
| 6Li (KED)   | 136.224 %             | 0.9 %             |
| 9Be (KED)   | 0.021 ppb             | 66.4 %            |
| 11B (KED)   | -3.261 ppb            | 32.0 %            |
| 24Mg (KED)  | 793.868 ppb           | 1.9 %             |
| 27Al (KED)  | 792.878 ppb           | 0.3 %             |
| 45Sc (KED)  | 142.222 %             | 1.9 %             |
| 51V (KED)   | 1.564 ppb             | 4.8 %             |
| 52Cr (KED)  | 3.911 ppb             | 2.4 %             |
| 55Mn (KED)  | 21.422 ppb            | 2.0 %             |
| 56Fe (KED)  | 856.155 ppb           | 2.4 %             |
| 58Ni (KED)  | 3.904 ppb             | 1.5 %             |
| 59Co (KED)  | 0.433 ppb             | 2.9 %             |
| 63Cu (KED)  | 11.351 ppb            | 0.6 %             |
| 64Zn (KED)  | 174.704 ppb           | 1.3 %             |
| 69Ga (KED)  | 3.646 ppb             | 0.9 %             |
| 75As (KED)  | 0.755 ppb             | 8.2 %             |
| 80Se (KED)  | 1.226 ppb             | 21.0 %            |
| 85Rb (KED)  | 2.940 ppb             | 3.2 %             |
| 88Sr (KED)  | 10.717 ppb            | 1.9 %             |
| 89Y (KED)   | 117.288 %             | 1.4 %             |
| 107Ag (KED) | 0.058 ppb             | 3.0 %             |
| 114Cd (KED) | 0.060 ppb             | 9.1 %             |
| 115In (KED) | 97.768 %              | 2.4 %             |
| 133Cs (KED) | 0.170 ppb             | 4.5 %             |
| 138Ba (KED) | 11.758 ppb            | 1.9 %             |
| 139La (KED) | 0.616 ppb             | 1.4 %             |
| 140Ce (KED) | 1.349 ppb             | 1.4 %             |
| 141Pr (KED) | 0.145 ppb             | 3.1 %             |
| 142Nd (KED) | 0.804 ppb             | 1.2 %             |
| 152Sm (KED) | 0.106 ppb             | 2.3 %             |
| 153Eu (KED) | 0.023 ppb             | 4.9 %             |
| 158Gd (KED) | 0.095 ppb             | 0.5 %             |
| 159Tb (KED) | 93.458 %              | 0.7 %             |
| 164Dy (KED) | 0.063 ppb             | 0.6 %             |
| 166Er (KED) | 0.029 ppb             | 3.3 %             |
| 169Tm (KED) | 0.004 ppb             | 2.3 %             |
| 174Yb (KED) | 0.024 ppb             | 1.6 %             |
| 175Lu (KED) | -0.421 ppb            | 1.1 %             |
| 205Tl (KED) | 0.015 ppb             | 1.1 %             |
| 208Pb (KED) | 4.922 ppb             | 2.8 %             |
| 209Bi (KED) | 71.008 %              | 0.7 %             |
| 232Th (KED) | 0.259 ppb             | 1.8 %             |
| 238U (KED)  | 0.080 ppb             | 2.3 %             |

| Category   | Concentration average | Intensity average | Intensity RSD |
|------------|-----------------------|-------------------|---------------|
| 6Li (KED)  | 136.224 %             | 2,971 cps         | 0.9 %         |
| 9Be (KED)  | 0.021 ppb             | 4 cps             | 43.3 %        |
| 11B (KED)  | -3.261 ppb            | 443 cps           | 16.3 %        |
| 24Mg (KED) | 793.868 ppb           | 346,377 cps       | 1.6 %         |
| 27Al (KED) | 792.878 ppb           | 74,227 cps        | 1.7 %         |

| Category    | Concentration average | Intensity average | Intensity RSD |
|-------------|-----------------------|-------------------|---------------|
| 45Sc (KED)  | 142.222 %             | 34,288 cps        | 1.9 %         |
| 51V (KED)   | 1.564 ppb             | 10,305 cps        | 3.3 %         |
| 52Cr (KED)  | 3.911 ppb             | 41,799 cps        | 0.7 %         |
| 55Mn (KED)  | 21.422 ppb            | 102,530 cps       | 0.2 %         |
| 56Fe (KED)  | 856.155 ppb           | 8,143,163 cps     | 1.0 %         |
| 58Ni (KED)  | 3.904 ppb             | 53,756 cps        | 0.6 %         |
| 59Co (KED)  | 0.433 ppb             | 9,496 cps         | 1.5 %         |
| 63Cu (KED)  | 11.351 ppb            | 155,574 cps       | 1.2 %         |
| 64Zn (KED)  | 174.704 ppb           | 566,561 cps       | 0.6 %         |
| 69Ga (KED)  | 3.646 ppb             | 13,851 cps        | 0.6 %         |
| 75As (KED)  | 0.755 ppb             | 688 cps           | 7.3 %         |
| 80Se (KED)  | 1.226 ppb             | 671 cps           | 9.1 %         |
| 85Rb (KED)  | 2.940 ppb             | 10,120 cps        | 2.0 %         |
| 88Sr (KED)  | 10.717 ppb            | 52,212 cps        | 1.2 %         |
| 89Y (KED)   | 117.288 %             | 278,993 cps       | 1.4 %         |
| 107Ag (KED) | 0.058 ppb             | 2,209 cps         | 2.8 %         |
| 114Cd (KED) | 0.060 ppb             | 894 cps           | 7.0 %         |
| 115In (KED) | 97.768 %              | 497,765 cps       | 2.4 %         |
| 133Cs (KED) | 0.170 ppb             | 2,915 cps         | 2.0 %         |
| 138Ba (KED) | 11.758 ppb            | 282,110 cps       | 1.5 %         |
| 139La (KED) | 0.616 ppb             | 32,038 cps        | 1.2 %         |
| 140Ce (KED) | 1.349 ppb             | 97,548 cps        | 0.7 %         |
| 141Pr (KED) | 0.145 ppb             | 10,839 cps        | 3.4 %         |
| 142Nd (KED) | 0.804 ppb             | 24,664 cps        | 0.7 %         |
| 152Sm (KED) | 0.106 ppb             | 3,214 cps         | 2.8 %         |
| 153Eu (KED) | 0.023 ppb             | 1,356 cps         | 5.2 %         |
| 158Gd (KED) | 0.095 ppb             | 4,253 cps         | 1.0 %         |
| 159Tb (KED) | 93.458 %              | 3,124,508 cps     | 0.7 %         |
| 164Dy (KED) | 0.063 ppb             | 3,091 cps         | 1.1 %         |
| 166Er (KED) | 0.029 ppb             | 2,135 cps         | 3.1 %         |
| 169Tm (KED) | 0.004 ppb             | 889 cps           | 1.6 %         |
| 174Yb (KED) | 0.024 ppb             | 1,822 cps         | 0.9 %         |
| 175Lu (KED) | -0.421 ppb            | 19,011 cps        | 1.8 %         |
| 205Tl (KED) | 0.015 ppb             | 1,887 cps         | 1.1 %         |
| 208Pb (KED) | 4.922 ppb             | 459,541 cps       | 3.1 %         |
| 209Bi (KED) | 71.008 %              | 2,535,300 cps     | 0.7 %         |
| 232Th (KED) | 0.259 ppb             | 42,560 cps        | 1.3 %         |
| 238U (KED)  | 0.080 ppb             | 15,950 cps        | 2.5 %         |

## Sample Summary

Instrument ID: iCAP Q

Analysis index: 15

Analysis name: 026077jian

Analysis started at: 9/7/2021 4:13:21 PM

User name: WINDOWS-UPCI4ER\Administrator

| Category    | Concentration average | Concentration RSD |
|-------------|-----------------------|-------------------|
| 6Li (KED)   | 140.963 %             | 2.8 %             |
| 9Be (KED)   | 0.013 ppb             | 185.7 %           |
| 11B (KED)   | -1.776 ppb            | 20.5 %            |
| 24Mg (KED)  | 583.810 ppb           | 3.3 %             |
| 27Al (KED)  | 681.439 ppb           | 2.7 %             |
| 45Sc (KED)  | 140.235 %             | 1.8 %             |
| 51V (KED)   | 1.302 ppb             | 2.2 %             |
| 52Cr (KED)  | 3.410 ppb             | 3.2 %             |
| 55Mn (KED)  | 17.483 ppb            | 2.3 %             |
| 56Fe (KED)  | 701.428 ppb           | 2.1 %             |
| 58Ni (KED)  | 3.276 ppb             | 3.6 %             |
| 59Co (KED)  | 0.347 ppb             | 3.3 %             |
| 63Cu (KED)  | 11.226 ppb            | 2.2 %             |
| 64Zn (KED)  | 157.977 ppb           | 2.8 %             |
| 69Ga (KED)  | 2.513 ppb             | 1.5 %             |
| 75As (KED)  | 0.737 ppb             | 6.5 %             |
| 80Se (KED)  | 0.957 ppb             | 25.3 %            |
| 85Rb (KED)  | 2.190 ppb             | 4.3 %             |
| 88Sr (KED)  | 8.836 ppb             | 1.4 %             |
| 89Y (KED)   | 119.433 %             | 2.3 %             |
| 107Ag (KED) | 0.090 ppb             | 4.2 %             |
| 114Cd (KED) | 0.060 ppb             | 4.7 %             |
| 115In (KED) | 101.246 %             | 2.2 %             |
| 133Cs (KED) | 0.143 ppb             | 3.2 %             |
| 138Ba (KED) | 7.985 ppb             | 3.1 %             |
| 139La (KED) | 0.544 ppb             | 2.7 %             |
| 140Ce (KED) | 1.137 ppb             | 2.6 %             |
| 141Pr (KED) | 0.128 ppb             | 1.6 %             |
| 142Nd (KED) | 0.685 ppb             | 1.4 %             |
| 152Sm (KED) | 0.091 ppb             | 3.1 %             |
| 153Eu (KED) | 0.020 ppb             | 5.6 %             |
| 158Gd (KED) | 0.082 ppb             | 2.9 %             |
| 159Tb (KED) | 98.497 %              | 1.7 %             |
| 164Dy (KED) | 0.059 ppb             | 2.6 %             |
| 166Er (KED) | 0.026 ppb             | 8.0 %             |
| 169Tm (KED) | 0.004 ppb             | 9.8 %             |
| 174Yb (KED) | 0.021 ppb             | 2.2 %             |
| 175Lu (KED) | -0.429 ppb            | 1.4 %             |
| 205Tl (KED) | 0.010 ppb             | 7.0 %             |
| 208Pb (KED) | 1.443 ppb             | 1.3 %             |
| 209Bi (KED) | 76.880 %              | 0.9 %             |
| 232Th (KED) | 0.204 ppb             | 3.5 %             |
| 238U (KED)  | 0.069 ppb             | 0.2 %             |

| Category   | Concentration average | Intensity average | Intensity RSD |
|------------|-----------------------|-------------------|---------------|
| 6Li (KED)  | 140.963 %             | 3,075 cps         | 2.8 %         |
| 9Be (KED)  | 0.013 ppb             | 3 cps             | 100.0 %       |
| 11B (KED)  | -1.776 ppb            | 563 cps           | 4.6 %         |
| 24Mg (KED) | 583.810 ppb           | 263,559 cps       | 1.1 %         |
| 27Al (KED) | 681.439 ppb           | 62,904 cps        | 1.6 %         |

| Category    | Concentration average | Intensity average | Intensity RSD |
|-------------|-----------------------|-------------------|---------------|
| 45Sc (KED)  | 140.235 %             | 33,809 cps        | 1.8 %         |
| 51V (KED)   | 1.302 ppb             | 8,464 cps         | 1.6 %         |
| 52Cr (KED)  | 3.410 ppb             | 35,953 cps        | 1.4 %         |
| 55Mn (KED)  | 17.483 ppb            | 82,542 cps        | 1.2 %         |
| 56Fe (KED)  | 701.428 ppb           | 6,579,404 cps     | 0.3 %         |
| 58Ni (KED)  | 3.276 ppb             | 44,793 cps        | 1.6 %         |
| 59Co (KED)  | 0.347 ppb             | 7,567 cps         | 2.7 %         |
| 63Cu (KED)  | 11.226 ppb            | 156,639 cps       | 0.3 %         |
| 64Zn (KED)  | 157.977 ppb           | 521,691 cps       | 0.5 %         |
| 69Ga (KED)  | 2.513 ppb             | 9,747 cps         | 3.7 %         |
| 75As (KED)  | 0.737 ppb             | 683 cps           | 5.9 %         |
| 80Se (KED)  | 0.957 ppb             | 613 cps           | 11.4 %        |
| 85Rb (KED)  | 2.190 ppb             | 7,687 cps         | 3.4 %         |
| 88Sr (KED)  | 8.836 ppb             | 43,864 cps        | 1.5 %         |
| 89Y (KED)   | 119.433 %             | 284,095 cps       | 2.3 %         |
| 107Ag (KED) | 0.090 ppb             | 3,544 cps         | 2.1 %         |
| 114Cd (KED) | 0.060 ppb             | 929 cps           | 2.0 %         |
| 115In (KED) | 101.246 %             | 515,473 cps       | 2.2 %         |
| 133Cs (KED) | 0.143 ppb             | 2,536 cps         | 2.4 %         |
| 138Ba (KED) | 7.985 ppb             | 202,325 cps       | 1.5 %         |
| 139La (KED) | 0.544 ppb             | 29,783 cps        | 1.6 %         |
| 140Ce (KED) | 1.137 ppb             | 86,681 cps        | 1.0 %         |
| 141Pr (KED) | 0.128 ppb             | 10,069 cps        | 2.5 %         |
| 142Nd (KED) | 0.685 ppb             | 22,168 cps        | 2.8 %         |
| 152Sm (KED) | 0.091 ppb             | 2,896 cps         | 2.9 %         |
| 153Eu (KED) | 0.020 ppb             | 1,259 cps         | 4.4 %         |
| 158Gd (KED) | 0.082 ppb             | 3,865 cps         | 2.9 %         |
| 159Tb (KED) | 98.497 %              | 3,292,955 cps     | 1.7 %         |
| 164Dy (KED) | 0.059 ppb             | 3,013 cps         | 1.7 %         |
| 166Er (KED) | 0.026 ppb             | 2,055 cps         | 4.8 %         |
| 169Tm (KED) | 0.004 ppb             | 767 cps           | 8.6 %         |
| 174Yb (KED) | 0.021 ppb             | 1,749 cps         | 3.5 %         |
| 175Lu (KED) | -0.429 ppb            | 19,173 cps        | 2.1 %         |
| 205Tl (KED) | 0.010 ppb             | 1,441 cps         | 6.0 %         |
| 208Pb (KED) | 1.443 ppb             | 158,110 cps       | 0.7 %         |
| 209Bi (KED) | 76.880 %              | 2,744,959 cps     | 0.9 %         |
| 232Th (KED) | 0.204 ppb             | 36,232 cps        | 2.6 %         |
| 238U (KED)  | 0.069 ppb             | 14,896 cps        | 0.8 %         |

## Sample Summary

Instrument ID: iCAP Q

Analysis index: 16

Analysis name: 027060jian

Analysis started at: 9/7/2021 4:17:00 PM

User name: WINDOWS-UPCI4ER\Administrator

| Category    | Concentration average | Concentration RSD |
|-------------|-----------------------|-------------------|
| 6Li (KED)   | 136.377 %             | 4.7 %             |
| 9Be (KED)   | 0.022 ppb             | 72.3 %            |
| 11B (KED)   | -0.978 ppb            | 109.4 %           |
| 24Mg (KED)  | 1,040.342 ppb         | 3.9 %             |
| 27Al (KED)  | 1,225.830 ppb         | 1.5 %             |
| 45Sc (KED)  | 140.323 %             | 2.0 %             |
| 51V (KED)   | 2.327 ppb             | 4.3 %             |
| 52Cr (KED)  | 5.542 ppb             | 2.4 %             |
| 55Mn (KED)  | 30.951 ppb            | 1.5 %             |
| 56Fe (KED)  | 1,189.686 ppb         | 2.1 %             |
| 58Ni (KED)  | 5.366 ppb             | 1.7 %             |
| 59Co (KED)  | 0.606 ppb             | 3.3 %             |
| 63Cu (KED)  | 9.325 ppb             | 3.4 %             |
| 64Zn (KED)  | 157.113 ppb           | 2.2 %             |
| 69Ga (KED)  | 3.912 ppb             | 2.0 %             |
| 75As (KED)  | 0.963 ppb             | 7.3 %             |
| 80Se (KED)  | 0.758 ppb             | 18.6 %            |
| 85Rb (KED)  | 2.691 ppb             | 4.2 %             |
| 88Sr (KED)  | 13.020 ppb            | 2.1 %             |
| 89Y (KED)   | 122.488 %             | 2.1 %             |
| 107Ag (KED) | 0.069 ppb             | 4.3 %             |
| 114Cd (KED) | 0.046 ppb             | 11.8 %            |
| 115In (KED) | 101.706 %             | 1.9 %             |
| 133Cs (KED) | 0.260 ppb             | 2.8 %             |
| 138Ba (KED) | 13.120 ppb            | 2.9 %             |
| 139La (KED) | 0.882 ppb             | 2.3 %             |
| 140Ce (KED) | 1.897 ppb             | 4.1 %             |
| 141Pr (KED) | 0.204 ppb             | 3.4 %             |
| 142Nd (KED) | 1.138 ppb             | 3.1 %             |
| 152Sm (KED) | 0.152 ppb             | 1.2 %             |
| 153Eu (KED) | 0.032 ppb             | 5.7 %             |
| 158Gd (KED) | 0.138 ppb             | 2.7 %             |
| 159Tb (KED) | 101.332 %             | 2.8 %             |
| 164Dy (KED) | 0.096 ppb             | 0.7 %             |
| 166Er (KED) | 0.046 ppb             | 1.1 %             |
| 169Tm (KED) | 0.006 ppb             | 3.4 %             |
| 174Yb (KED) | 0.036 ppb             | 7.6 %             |
| 175Lu (KED) | -0.431 ppb            | 1.2 %             |
| 205Tl (KED) | 0.018 ppb             | 6.0 %             |
| 208Pb (KED) | 1.721 ppb             | 3.6 %             |
| 209Bi (KED) | 79.418 %              | 1.1 %             |
| 232Th (KED) | 0.359 ppb             | 2.2 %             |
| 238U (KED)  | 0.139 ppb             | 1.7 %             |

| Category   | Concentration average | Intensity average | Intensity RSD |
|------------|-----------------------|-------------------|---------------|
| 6Li (KED)  | 136.377 %             | 2,975 cps         | 4.7 %         |
| 9Be (KED)  | 0.022 ppb             | 4 cps             | 43.3 %        |
| 11B (KED)  | -0.978 ppb            | 601 cps           | 15.8 %        |
| 24Mg (KED) | 1,040.342 ppb         | 453,782 cps       | 1.0 %         |
| 27Al (KED) | 1,225.830 ppb         | 113,151 cps       | 0.5 %         |

# Comprehensive

9/7/2021 4:53:36 PM

| Category    | Concentration average | Intensity average | Intensity RSD |
|-------------|-----------------------|-------------------|---------------|
| 45Sc (KED)  | 140.323 %             | 33,830 cps        | 2.0 %         |
| 51V (KED)   | 2.327 ppb             | 15,120 cps        | 2.9 %         |
| 52Cr (KED)  | 5.542 ppb             | 58,386 cps        | 0.6 %         |
| 55Mn (KED)  | 30.951 ppb            | 146,098 cps       | 1.5 %         |
| 56Fe (KED)  | 1,189.686 ppb         | 11,162,685 cps    | 0.6 %         |
| 58Ni (KED)  | 5.366 ppb             | 72,167 cps        | 0.9 %         |
| 59Co (KED)  | 0.606 ppb             | 13,033 cps        | 2.2 %         |
| 63Cu (KED)  | 9.325 ppb             | 133,666 cps       | 1.4 %         |
| 64Zn (KED)  | 157.113 ppb           | 532,185 cps       | 0.1 %         |
| 69Ga (KED)  | 3.912 ppb             | 15,511 cps        | 0.1 %         |
| 75As (KED)  | 0.963 ppb             | 916 cps           | 9.3 %         |
| 80Se (KED)  | 0.758 ppb             | 574 cps           | 5.6 %         |
| 85Rb (KED)  | 2.691 ppb             | 9,675 cps         | 2.1 %         |
| 88Sr (KED)  | 13.020 ppb            | 66,200 cps        | 1.0 %         |
| 89Y (KED)   | 122.488 %             | 291,362 cps       | 2.1 %         |
| 107Ag (KED) | 0.069 ppb             | 2,750 cps         | 5.0 %         |
| 114Cd (KED) | 0.046 ppb             | 750 cps           | 11.8 %        |
| 115In (KED) | 101.706 %             | 517,814 cps       | 1.9 %         |
| 133Cs (KED) | 0.260 ppb             | 4,613 cps         | 0.8 %         |
| 138Ba (KED) | 13.120 ppb            | 340,965 cps       | 0.4 %         |
| 139La (KED) | 0.882 ppb             | 49,622 cps        | 1.7 %         |
| 140Ce (KED) | 1.897 ppb             | 148,414 cps       | 1.3 %         |
| 141Pr (KED) | 0.204 ppb             | 16,499 cps        | 0.6 %         |
| 142Nd (KED) | 1.138 ppb             | 37,806 cps        | 0.3 %         |
| 152Sm (KED) | 0.152 ppb             | 4,979 cps         | 4.1 %         |
| 153Eu (KED) | 0.032 ppb             | 2,067 cps         | 3.4 %         |
| 158Gd (KED) | 0.138 ppb             | 6,721 cps         | 3.0 %         |
| 159Tb (KED) | 101.332 %             | 3,387,749 cps     | 2.8 %         |
| 164Dy (KED) | 0.096 ppb             | 5,083 cps         | 2.6 %         |
| 166Er (KED) | 0.046 ppb             | 3,368 cps         | 2.0 %         |
| 169Tm (KED) | 0.006 ppb             | 1,359 cps         | 4.4 %         |
| 174Yb (KED) | 0.036 ppb             | 2,960 cps         | 5.4 %         |
| 175Lu (KED) | -0.431 ppb            | 19,487 cps        | 0.7 %         |
| 205Tl (KED) | 0.018 ppb             | 2,625 cps         | 5.2 %         |
| 208Pb (KED) | 1.721 ppb             | 191,318 cps       | 2.3 %         |
| 209Bi (KED) | 79.418 %              | 2,835,562 cps     | 1.1 %         |
| 232Th (KED) | 0.359 ppb             | 65,770 cps        | 2.9 %         |
| 238U (KED)  | 0.139 ppb             | 30,919 cps        | 2.8 %         |

## Sample Summary

Instrument ID: iCAP Q

Analysis index: 17

Analysis name: 019243ti

Analysis started at: 9/7/2021 4:20:34 PM

User name: WINDOWS-UPCI4ER\Administrator

| Category    | Concentration average | Concentration RSD |
|-------------|-----------------------|-------------------|
| 6Li (KED)   | 139.638 %             | 3.3 %             |
| 9Be (KED)   | 0.005 ppb             | 284.4 %           |
| 11B (KED)   | -2.520 ppb            | 31.7 %            |
| 24Mg (KED)  | 583.925 ppb           | 3.6 %             |
| 27Al (KED)  | 539.793 ppb           | 3.5 %             |
| 45Sc (KED)  | 140.416 %             | 2.7 %             |
| 51V (KED)   | 1.108 ppb             | 3.3 %             |
| 52Cr (KED)  | 5.516 ppb             | 1.8 %             |
| 55Mn (KED)  | 15.965 ppb            | 3.7 %             |
| 56Fe (KED)  | 637.606 ppb           | 2.8 %             |
| 58Ni (KED)  | 3.266 ppb             | 2.9 %             |
| 59Co (KED)  | 0.306 ppb             | 3.3 %             |
| 63Cu (KED)  | 11.253 ppb            | 1.2 %             |
| 64Zn (KED)  | 184.874 ppb           | 1.3 %             |
| 69Ga (KED)  | 2.136 ppb             | 0.9 %             |
| 75As (KED)  | 0.619 ppb             | 6.1 %             |
| 80Se (KED)  | 1.341 ppb             | 14.4 %            |
| 85Rb (KED)  | 1.995 ppb             | 4.4 %             |
| 88Sr (KED)  | 9.645 ppb             | 0.3 %             |
| 89Y (KED)   | 121.728 %             | 0.9 %             |
| 107Ag (KED) | 0.087 ppb             | 2.8 %             |
| 114Cd (KED) | 0.067 ppb             | 1.6 %             |
| 115In (KED) | 104.980 %             | 0.5 %             |
| 133Cs (KED) | 0.117 ppb             | 2.5 %             |
| 138Ba (KED) | 7.414 ppb             | 0.4 %             |
| 139La (KED) | 0.539 ppb             | 1.7 %             |
| 140Ce (KED) | 1.092 ppb             | 0.4 %             |
| 141Pr (KED) | 0.122 ppb             | 2.1 %             |
| 142Nd (KED) | 0.686 ppb             | 1.4 %             |
| 152Sm (KED) | 0.089 ppb             | 4.1 %             |
| 153Eu (KED) | 0.018 ppb             | 6.5 %             |
| 158Gd (KED) | 0.076 ppb             | 7.2 %             |
| 159Tb (KED) | 103.806 %             | 1.4 %             |
| 164Dy (KED) | 0.051 ppb             | 10.6 %            |
| 166Er (KED) | 0.022 ppb             | 2.4 %             |
| 169Tm (KED) | 0.003 ppb             | 3.9 %             |
| 174Yb (KED) | 0.020 ppb             | 2.2 %             |
| 175Lu (KED) | -0.440 ppb            | 0.4 %             |
| 205Tl (KED) | 0.010 ppb             | 3.8 %             |
| 208Pb (KED) | 1.559 ppb             | 1.8 %             |
| 209Bi (KED) | 79.949 %              | 1.1 %             |
| 232Th (KED) | 0.182 ppb             | 0.9 %             |
| 238U (KED)  | 0.068 ppb             | 2.3 %             |

| Category   | Concentration average | Intensity average | Intensity RSD |
|------------|-----------------------|-------------------|---------------|
| 6Li (KED)  | 139.638 %             | 3,046 cps         | 3.3 %         |
| 9Be (KED)  | 0.005 ppb             | 2 cps             | 86.6 %        |
| 11B (KED)  | -2.520 ppb            | 506 cps           | 9.9 %         |
| 24Mg (KED) | 583.925 ppb           | 261,081 cps       | 0.7 %         |
| 27Al (KED) | 539.793 ppb           | 49,895 cps        | 0.8 %         |

# Comprehensive

9/7/2021 4:53:36 PM

| Category    | Concentration average | Intensity average | Intensity RSD |
|-------------|-----------------------|-------------------|---------------|
| 45Sc (KED)  | 140.416 %             | 33,853 cps        | 2.7 %         |
| 51V (KED)   | 1.108 ppb             | 7,211 cps         | 1.2 %         |
| 52Cr (KED)  | 5.516 ppb             | 58,153 cps        | 1.3 %         |
| 55Mn (KED)  | 15.965 ppb            | 75,454 cps        | 1.1 %         |
| 56Fe (KED)  | 637.606 ppb           | 5,987,434 cps     | 0.2 %         |
| 58Ni (KED)  | 3.266 ppb             | 44,712 cps        | 0.9 %         |
| 59Co (KED)  | 0.306 ppb             | 6,701 cps         | 4.6 %         |
| 63Cu (KED)  | 11.253 ppb            | 160,074 cps       | 0.8 %         |
| 64Zn (KED)  | 184.874 ppb           | 622,147 cps       | 0.5 %         |
| 69Ga (KED)  | 2.136 ppb             | 8,455 cps         | 0.9 %         |
| 75As (KED)  | 0.619 ppb             | 587 cps           | 6.9 %         |
| 80Se (KED)  | 1.341 ppb             | 728 cps           | 6.3 %         |
| 85Rb (KED)  | 1.995 ppb             | 7,144 cps         | 4.9 %         |
| 88Sr (KED)  | 9.645 ppb             | 48,791 cps        | 0.6 %         |
| 89Y (KED)   | 121.728 %             | 289,553 cps       | 0.9 %         |
| 107Ag (KED) | 0.087 ppb             | 3,533 cps         | 2.3 %         |
| 114Cd (KED) | 0.067 ppb             | 1,060 cps         | 1.1 %         |
| 115In (KED) | 104.980 %             | 534,483 cps       | 0.5 %         |
| 133Cs (KED) | 0.117 ppb             | 2,158 cps         | 2.7 %         |
| 138Ba (KED) | 7.414 ppb             | 198,156 cps       | 1.2 %         |
| 139La (KED) | 0.539 ppb             | 31,097 cps        | 0.6 %         |
| 140Ce (KED) | 1.092 ppb             | 87,746 cps        | 1.1 %         |
| 141Pr (KED) | 0.122 ppb             | 10,136 cps        | 1.2 %         |
| 142Nd (KED) | 0.686 ppb             | 23,388 cps        | 0.2 %         |
| 152Sm (KED) | 0.089 ppb             | 3,008 cps         | 4.1 %         |
| 153Eu (KED) | 0.018 ppb             | 1,218 cps         | 5.0 %         |
| 158Gd (KED) | 0.076 ppb             | 3,773 cps         | 5.8 %         |
| 159Tb (KED) | 103.806 %             | 3,470,463 cps     | 1.4 %         |
| 164Dy (KED) | 0.051 ppb             | 2,763 cps         | 9.1 %         |
| 166Er (KED) | 0.022 ppb             | 1,891 cps         | 3.2 %         |
| 169Tm (KED) | 0.003 ppb             | 746 cps           | 2.9 %         |
| 174Yb (KED) | 0.020 ppb             | 1,730 cps         | 1.7 %         |
| 175Lu (KED) | -0.440 ppb            | 18,852 cps        | 1.2 %         |
| 205Tl (KED) | 0.010 ppb             | 1,535 cps         | 3.2 %         |
| 208Pb (KED) | 1.559 ppb             | 176,140 cps       | 1.3 %         |
| 209Bi (KED) | 79.949 %              | 2,854,534 cps     | 1.1 %         |
| 232Th (KED) | 0.182 ppb             | 33,641 cps        | 0.8 %         |
| 238U (KED)  | 0.068 ppb             | 15,301 cps        | 2.2 %         |

## Sample Summary

Instrument ID: iCAP Q

Analysis index: 18

Analysis name: 19000009wu

Analysis started at: 9/7/2021 4:24:13 PM

User name: WINDOWS-UPCI4ER\Administrator

| Category    | Concentration average | Concentration RSD |
|-------------|-----------------------|-------------------|
| 6Li (KED)   | 136.021 %             | 2.8 %             |
| 9Be (KED)   | 0.021 ppb             | 130.5 %           |
| 11B (KED)   | 0.074 ppb             | 2,108.3 %         |
| 24Mg (KED)  | 920.113 ppb           | 1.6 %             |
| 27Al (KED)  | 676.442 ppb           | 1.3 %             |
| 45Sc (KED)  | 143.045 %             | 1.7 %             |
| 51V (KED)   | 1.375 ppb             | 2.2 %             |
| 52Cr (KED)  | 3.560 ppb             | 1.4 %             |
| 55Mn (KED)  | 20.588 ppb            | 0.9 %             |
| 56Fe (KED)  | 805.883 ppb           | 1.4 %             |
| 58Ni (KED)  | 3.749 ppb             | 1.3 %             |
| 59Co (KED)  | 0.412 ppb             | 1.3 %             |
| 63Cu (KED)  | 9.746 ppb             | 1.1 %             |
| 64Zn (KED)  | 174.043 ppb           | 1.1 %             |
| 69Ga (KED)  | 2.382 ppb             | 2.4 %             |
| 75As (KED)  | 0.608 ppb             | 7.9 %             |
| 80Se (KED)  | 1.048 ppb             | 1.1 %             |
| 85Rb (KED)  | 2.016 ppb             | 0.6 %             |
| 88Sr (KED)  | 11.450 ppb            | 0.9 %             |
| 89Y (KED)   | 124.578 %             | 0.6 %             |
| 107Ag (KED) | 0.076 ppb             | 5.7 %             |
| 114Cd (KED) | 0.063 ppb             | 6.3 %             |
| 115In (KED) | 104.354 %             | 1.9 %             |
| 133Cs (KED) | 0.151 ppb             | 4.2 %             |
| 138Ba (KED) | 8.078 ppb             | 1.4 %             |
| 139La (KED) | 0.578 ppb             | 2.4 %             |
| 140Ce (KED) | 1.241 ppb             | 6.5 %             |
| 141Pr (KED) | 0.136 ppb             | 0.7 %             |
| 142Nd (KED) | 0.734 ppb             | 2.9 %             |
| 152Sm (KED) | 0.101 ppb             | 0.8 %             |
| 153Eu (KED) | 0.022 ppb             | 5.9 %             |
| 158Gd (KED) | 0.092 ppb             | 2.7 %             |
| 159Tb (KED) | 102.852 %             | 1.1 %             |
| 164Dy (KED) | 0.062 ppb             | 1.2 %             |
| 166Er (KED) | 0.028 ppb             | 7.5 %             |
| 169Tm (KED) | 0.004 ppb             | 5.0 %             |
| 174Yb (KED) | 0.023 ppb             | 5.7 %             |
| 175Lu (KED) | -0.439 ppb            | 0.8 %             |
| 205Tl (KED) | 0.012 ppb             | 7.0 %             |
| 208Pb (KED) | 1.130 ppb             | 1.7 %             |
| 209Bi (KED) | 79.425 %              | 0.7 %             |
| 232Th (KED) | 0.217 ppb             | 2.0 %             |
| 238U (KED)  | 0.111 ppb             | 2.2 %             |

| Category   | Concentration average | Intensity average | Intensity RSD |
|------------|-----------------------|-------------------|---------------|
| 6Li (KED)  | 136.021 %             | 2,967 cps         | 2.8 %         |
| 9Be (KED)  | 0.021 ppb             | 4 cps             | 86.6 %        |
| 11B (KED)  | 0.074 ppb             | 668 cps           | 13.2 %        |
| 24Mg (KED) | 920.113 ppb           | 400,708 cps       | 1.5 %         |
| 27Al (KED) | 676.442 ppb           | 63,701 cps        | 0.5 %         |

# Comprehensive

9/7/2021 4:53:36 PM

| Category    | Concentration average | Intensity average | Intensity RSD |
|-------------|-----------------------|-------------------|---------------|
| 45Sc (KED)  | 143.045 %             | 34,487 cps        | 1.7 %         |
| 51V (KED)   | 1.375 ppb             | 9,116 cps         | 0.5 %         |
| 52Cr (KED)  | 3.560 ppb             | 38,292 cps        | 0.3 %         |
| 55Mn (KED)  | 20.588 ppb            | 99,132 cps        | 0.9 %         |
| 56Fe (KED)  | 805.883 ppb           | 7,711,024 cps     | 1.3 %         |
| 58Ni (KED)  | 3.749 ppb             | 52,006 cps        | 0.4 %         |
| 59Co (KED)  | 0.412 ppb             | 9,101 cps         | 1.0 %         |
| 63Cu (KED)  | 9.746 ppb             | 142,074 cps       | 0.7 %         |
| 64Zn (KED)  | 174.043 ppb           | 599,547 cps       | 0.7 %         |
| 69Ga (KED)  | 2.382 ppb             | 9,643 cps         | 3.0 %         |
| 75As (KED)  | 0.608 ppb             | 590 cps           | 8.4 %         |
| 80Se (KED)  | 1.048 ppb             | 664 cps           | 0.8 %         |
| 85Rb (KED)  | 2.016 ppb             | 7,389 cps         | 1.2 %         |
| 88Sr (KED)  | 11.450 ppb            | 59,251 cps        | 1.6 %         |
| 89Y (KED)   | 124.578 %             | 296,333 cps       | 0.6 %         |
| 107Ag (KED) | 0.076 ppb             | 3,072 cps         | 3.8 %         |
| 114Cd (KED) | 0.063 ppb             | 999 cps           | 6.6 %         |
| 115In (KED) | 104.354 %             | 531,297 cps       | 1.9 %         |
| 133Cs (KED) | 0.151 ppb             | 2,770 cps         | 2.3 %         |
| 138Ba (KED) | 8.078 ppb             | 213,762 cps       | 0.7 %         |
| 139La (KED) | 0.578 ppb             | 33,084 cps        | 1.5 %         |
| 140Ce (KED) | 1.241 ppb             | 98,705 cps        | 5.6 %         |
| 141Pr (KED) | 0.136 ppb             | 11,153 cps        | 1.1 %         |
| 142Nd (KED) | 0.734 ppb             | 24,771 cps        | 1.8 %         |
| 152Sm (KED) | 0.101 ppb             | 3,365 cps         | 1.6 %         |
| 153Eu (KED) | 0.022 ppb             | 1,421 cps         | 4.9 %         |
| 158Gd (KED) | 0.092 ppb             | 4,543 cps         | 1.7 %         |
| 159Tb (KED) | 102.852 %             | 3,438,547 cps     | 1.1 %         |
| 164Dy (KED) | 0.062 ppb             | 3,334 cps         | 2.3 %         |
| 166Er (KED) | 0.028 ppb             | 2,265 cps         | 5.6 %         |
| 169Tm (KED) | 0.004 ppb             | 866 cps           | 5.1 %         |
| 174Yb (KED) | 0.023 ppb             | 1,980 cps         | 6.1 %         |
| 175Lu (KED) | -0.439 ppb            | 18,790 cps        | 2.9 %         |
| 205Tl (KED) | 0.012 ppb             | 1,771 cps         | 6.7 %         |
| 208Pb (KED) | 1.130 ppb             | 131,748 cps       | 1.1 %         |
| 209Bi (KED) | 79.425 %              | 2,835,811 cps     | 0.7 %         |
| 232Th (KED) | 0.217 ppb             | 39,904 cps        | 1.4 %         |
| 238U (KED)  | 0.111 ppb             | 24,710 cps        | 1.6 %         |

## Sample Summary

Instrument ID: iCAP Q

Analysis index: 19

Analysis name: wuhao fu

Analysis started at: 9/7/2021 4:27:43 PM

User name: WINDOWS-UPCI4ER\Administrator

| Category    | Concentration average | Concentration RSD |
|-------------|-----------------------|-------------------|
| 6Li (KED)   | 139.893 %             | 0.6 %             |
| 9Be (KED)   | 0.013 ppb             | 320.4 %           |
| 11B (KED)   | -1.476 ppb            | 85.6 %            |
| 24Mg (KED)  | 1,149.409 ppb         | 1.6 %             |
| 27Al (KED)  | 904.099 ppb           | 0.3 %             |
| 45Sc (KED)  | 152.538 %             | 1.0 %             |
| 51V (KED)   | 1.938 ppb             | 1.6 %             |
| 52Cr (KED)  | 4.332 ppb             | 0.7 %             |
| 55Mn (KED)  | 32.619 ppb            | 0.6 %             |
| 56Fe (KED)  | 855.722 ppb           | 0.4 %             |
| 58Ni (KED)  | 3.983 ppb             | 0.6 %             |
| 59Co (KED)  | 0.563 ppb             | 1.9 %             |
| 63Cu (KED)  | 11.540 ppb            | 1.3 %             |
| 64Zn (KED)  | 131.116 ppb           | 0.9 %             |
| 69Ga (KED)  | 3.375 ppb             | 2.1 %             |
| 75As (KED)  | 0.664 ppb             | 7.2 %             |
| 80Se (KED)  | 1.085 ppb             | 7.9 %             |
| 85Rb (KED)  | 3.276 ppb             | 2.3 %             |
| 88Sr (KED)  | 24.042 ppb            | 3.3 %             |
| 89Y (KED)   | 125.417 %             | 0.8 %             |
| 107Ag (KED) | 0.087 ppb             | 1.2 %             |
| 114Cd (KED) | 0.109 ppb             | 1.9 %             |
| 115In (KED) | 104.962 %             | 0.1 %             |
| 133Cs (KED) | 0.172 ppb             | 2.3 %             |
| 138Ba (KED) | 11.165 ppb            | 2.1 %             |
| 139La (KED) | 0.728 ppb             | 3.0 %             |
| 140Ce (KED) | 1.537 ppb             | 4.5 %             |
| 141Pr (KED) | 0.169 ppb             | 3.1 %             |
| 142Nd (KED) | 0.943 ppb             | 2.0 %             |
| 152Sm (KED) | 0.128 ppb             | 3.8 %             |
| 153Eu (KED) | 0.027 ppb             | 4.7 %             |
| 158Gd (KED) | 0.123 ppb             | 2.5 %             |
| 159Tb (KED) | 101.774 %             | 2.3 %             |
| 164Dy (KED) | 0.091 ppb             | 2.1 %             |
| 166Er (KED) | 0.043 ppb             | 3.9 %             |
| 169Tm (KED) | 0.006 ppb             | 5.3 %             |
| 174Yb (KED) | 0.036 ppb             | 6.8 %             |
| 175Lu (KED) | -0.441 ppb            | 2.4 %             |
| 205Tl (KED) | 0.021 ppb             | 7.2 %             |
| 208Pb (KED) | 2.057 ppb             | 2.3 %             |
| 209Bi (KED) | 75.829 %              | 0.8 %             |
| 232Th (KED) | 0.265 ppb             | 0.7 %             |
| 238U (KED)  | 0.122 ppb             | 2.1 %             |

| Category   | Concentration average | Intensity average | Intensity RSD |
|------------|-----------------------|-------------------|---------------|
| 6Li (KED)  | 139.893 %             | 3,051 cps         | 0.6 %         |
| 9Be (KED)  | 0.013 ppb             | 3 cps             | 173.2 %       |
| 11B (KED)  | -1.476 ppb            | 580 cps           | 15.0 %        |
| 24Mg (KED) | 1,149.409 ppb         | 514,836 cps       | 1.4 %         |
| 27Al (KED) | 904.099 ppb           | 90,766 cps        | 1.1 %         |

# Comprehensive

9/7/2021 4:53:36 PM

| Category    | Concentration average | Intensity average | Intensity RSD |
|-------------|-----------------------|-------------------|---------------|
| 45Sc (KED)  | 152.538 %             | 36,775 cps        | 1.0 %         |
| 51V (KED)   | 1.938 ppb             | 13,700 cps        | 1.0 %         |
| 52Cr (KED)  | 4.332 ppb             | 49,653 cps        | 0.3 %         |
| 55Mn (KED)  | 32.619 ppb            | 167,392 cps       | 1.4 %         |
| 56Fe (KED)  | 855.722 ppb           | 8,731,639 cps     | 0.5 %         |
| 58Ni (KED)  | 3.983 ppb             | 58,790 cps        | 1.1 %         |
| 59Co (KED)  | 0.563 ppb             | 13,194 cps        | 2.3 %         |
| 63Cu (KED)  | 11.540 ppb            | 169,117 cps       | 2.1 %         |
| 64Zn (KED)  | 131.116 ppb           | 455,196 cps       | 1.1 %         |
| 69Ga (KED)  | 3.375 ppb             | 13,716 cps        | 2.7 %         |
| 75As (KED)  | 0.664 ppb             | 648 cps           | 7.0 %         |
| 80Se (KED)  | 1.085 ppb             | 679 cps           | 3.0 %         |
| 85Rb (KED)  | 3.276 ppb             | 12,056 cps        | 3.1 %         |
| 88Sr (KED)  | 24.042 ppb            | 125,069 cps       | 4.0 %         |
| 89Y (KED)   | 125.417 %             | 298,329 cps       | 0.8 %         |
| 107Ag (KED) | 0.087 ppb             | 3,546 cps         | 1.3 %         |
| 114Cd (KED) | 0.109 ppb             | 1,640 cps         | 1.8 %         |
| 115In (KED) | 104.962 %             | 534,390 cps       | 0.1 %         |
| 133Cs (KED) | 0.172 ppb             | 3,163 cps         | 2.3 %         |
| 138Ba (KED) | 11.165 ppb            | 291,762 cps       | 2.1 %         |
| 139La (KED) | 0.728 ppb             | 41,147 cps        | 0.7 %         |
| 140Ce (KED) | 1.537 ppb             | 120,850 cps       | 2.3 %         |
| 141Pr (KED) | 0.169 ppb             | 13,756 cps        | 1.0 %         |
| 142Nd (KED) | 0.943 ppb             | 31,493 cps        | 1.5 %         |
| 152Sm (KED) | 0.128 ppb             | 4,224 cps         | 1.9 %         |
| 153Eu (KED) | 0.027 ppb             | 1,758 cps         | 2.4 %         |
| 158Gd (KED) | 0.123 ppb             | 5,997 cps         | 0.7 %         |
| 159Tb (KED) | 101.774 %             | 3,402,529 cps     | 2.3 %         |
| 164Dy (KED) | 0.091 ppb             | 4,794 cps         | 0.8 %         |
| 166Er (KED) | 0.043 ppb             | 3,185 cps         | 1.4 %         |
| 169Tm (KED) | 0.006 ppb             | 1,343 cps         | 7.5 %         |
| 174Yb (KED) | 0.036 ppb             | 2,977 cps         | 8.9 %         |
| 175Lu (KED) | -0.441 ppb            | 18,320 cps        | 4.7 %         |
| 205Tl (KED) | 0.021 ppb             | 2,879 cps         | 7.1 %         |
| 208Pb (KED) | 2.057 ppb             | 215,003 cps       | 2.2 %         |
| 209Bi (KED) | 75.829 %              | 2,707,425 cps     | 0.8 %         |
| 232Th (KED) | 0.265 ppb             | 46,459 cps        | 1.4 %         |
| 238U (KED)  | 0.122 ppb             | 25,737 cps        | 2.2 %         |

## Sample Summary

Instrument ID: iCAP Q

Analysis index: 20

Analysis name: wuhao ti

Analysis started at: 9/7/2021 4:31:19 PM

User name: WINDOWS-UPCI4ER\Administrator

| Category    | Concentration average | Concentration RSD |
|-------------|-----------------------|-------------------|
| 6Li (KED)   | 144.631 %             | 4.1 %             |
| 9Be (KED)   | 0.012 ppb             | 194.7 %           |
| 11B (KED)   | -3.024 ppb            | 1.8 %             |
| 24Mg (KED)  | 664.364 ppb           | 3.7 %             |
| 27Al (KED)  | 628.345 ppb           | 0.7 %             |
| 45Sc (KED)  | 151.180 %             | 1.3 %             |
| 51V (KED)   | 1.283 ppb             | 2.2 %             |
| 52Cr (KED)  | 3.110 ppb             | 2.7 %             |
| 55Mn (KED)  | 17.461 ppb            | 2.7 %             |
| 56Fe (KED)  | 725.412 ppb           | 1.6 %             |
| 58Ni (KED)  | 3.319 ppb             | 2.4 %             |
| 59Co (KED)  | 0.408 ppb             | 0.3 %             |
| 63Cu (KED)  | 14.120 ppb            | 1.3 %             |
| 64Zn (KED)  | 168.329 ppb           | 1.5 %             |
| 69Ga (KED)  | 2.631 ppb             | 0.5 %             |
| 75As (KED)  | 0.559 ppb             | 4.3 %             |
| 80Se (KED)  | 0.910 ppb             | 16.4 %            |
| 85Rb (KED)  | 2.698 ppb             | 2.9 %             |
| 88Sr (KED)  | 9.222 ppb             | 2.4 %             |
| 89Y (KED)   | 125.489 %             | 0.1 %             |
| 107Ag (KED) | 0.138 ppb             | 1.9 %             |
| 114Cd (KED) | 0.090 ppb             | 11.7 %            |
| 115In (KED) | 104.383 %             | 2.9 %             |
| 133Cs (KED) | 0.139 ppb             | 6.3 %             |
| 138Ba (KED) | 8.771 ppb             | 1.9 %             |
| 139La (KED) | 0.573 ppb             | 0.5 %             |
| 140Ce (KED) | 1.199 ppb             | 2.8 %             |
| 141Pr (KED) | 0.139 ppb             | 2.6 %             |
| 142Nd (KED) | 0.735 ppb             | 3.3 %             |
| 152Sm (KED) | 0.095 ppb             | 5.1 %             |
| 153Eu (KED) | 0.022 ppb             | 3.2 %             |
| 158Gd (KED) | 0.090 ppb             | 3.0 %             |
| 159Tb (KED) | 101.314 %             | 2.0 %             |
| 164Dy (KED) | 0.059 ppb             | 5.4 %             |
| 166Er (KED) | 0.026 ppb             | 4.9 %             |
| 169Tm (KED) | 0.004 ppb             | 7.1 %             |
| 174Yb (KED) | 0.022 ppb             | 3.9 %             |
| 175Lu (KED) | -0.444 ppb            | 1.0 %             |
| 205Tl (KED) | 0.013 ppb             | 3.1 %             |
| 208Pb (KED) | 1.034 ppb             | 4.0 %             |
| 209Bi (KED) | 77.815 %              | 0.3 %             |
| 232Th (KED) | 0.226 ppb             | 0.6 %             |
| 238U (KED)  | 0.074 ppb             | 3.3 %             |

| Category   | Concentration average | Intensity average | Intensity RSD |
|------------|-----------------------|-------------------|---------------|
| 6Li (KED)  | 144.631 %             | 3,155 cps         | 4.1 %         |
| 9Be (KED)  | 0.012 ppb             | 3 cps             | 100.0 %       |
| 11B (KED)  | -3.024 ppb            | 488 cps           | 3.9 %         |
| 24Mg (KED) | 664.364 ppb           | 307,550 cps       | 1.0 %         |
| 27Al (KED) | 628.345 ppb           | 62,552 cps        | 1.1 %         |

# Comprehensive

9/7/2021 4:53:36 PM

| Category    | Concentration average | Intensity average | Intensity RSD |
|-------------|-----------------------|-------------------|---------------|
| 45Sc (KED)  | 151.180 %             | 36,448 cps        | 1.3 %         |
| 51V (KED)   | 1.283 ppb             | 8,993 cps         | 1.8 %         |
| 52Cr (KED)  | 3.110 ppb             | 35,370 cps        | 1.6 %         |
| 55Mn (KED)  | 17.461 ppb            | 88,877 cps        | 1.9 %         |
| 56Fe (KED)  | 725.412 ppb           | 7,336,111 cps     | 0.5 %         |
| 58Ni (KED)  | 3.319 ppb             | 48,897 cps        | 1.0 %         |
| 59Co (KED)  | 0.408 ppb             | 9,534 cps         | 1.2 %         |
| 63Cu (KED)  | 14.120 ppb            | 206,690 cps       | 1.2 %         |
| 64Zn (KED)  | 168.329 ppb           | 584,178 cps       | 1.3 %         |
| 69Ga (KED)  | 2.631 ppb             | 10,716 cps        | 0.5 %         |
| 75As (KED)  | 0.559 ppb             | 547 cps           | 4.3 %         |
| 80Se (KED)  | 0.910 ppb             | 631 cps           | 6.7 %         |
| 85Rb (KED)  | 2.698 ppb             | 9,943 cps         | 2.8 %         |
| 88Sr (KED)  | 9.222 ppb             | 48,103 cps        | 2.3 %         |
| 89Y (KED)   | 125.489 %             | 298,499 cps       | 0.1 %         |
| 107Ag (KED) | 0.138 ppb             | 5,565 cps         | 1.5 %         |
| 114Cd (KED) | 0.090 ppb             | 1,371 cps         | 8.2 %         |
| 115In (KED) | 104.383 %             | 531,445 cps       | 2.9 %         |
| 133Cs (KED) | 0.139 ppb             | 2,552 cps         | 3.8 %         |
| 138Ba (KED) | 8.771 ppb             | 228,466 cps       | 0.6 %         |
| 139La (KED) | 0.573 ppb             | 32,315 cps        | 2.2 %         |
| 140Ce (KED) | 1.199 ppb             | 93,999 cps        | 1.7 %         |
| 141Pr (KED) | 0.139 ppb             | 11,243 cps        | 0.7 %         |
| 142Nd (KED) | 0.735 ppb             | 24,445 cps        | 1.4 %         |
| 152Sm (KED) | 0.095 ppb             | 3,120 cps         | 3.9 %         |
| 153Eu (KED) | 0.022 ppb             | 1,403 cps         | 1.4 %         |
| 158Gd (KED) | 0.090 ppb             | 4,390 cps         | 2.6 %         |
| 159Tb (KED) | 101.314 %             | 3,387,129 cps     | 2.0 %         |
| 164Dy (KED) | 0.059 ppb             | 3,115 cps         | 6.0 %         |
| 166Er (KED) | 0.026 ppb             | 2,110 cps         | 2.5 %         |
| 169Tm (KED) | 0.004 ppb             | 843 cps           | 5.3 %         |
| 174Yb (KED) | 0.022 ppb             | 1,833 cps         | 5.1 %         |
| 175Lu (KED) | -0.444 ppb            | 17,972 cps        | 4.9 %         |
| 205Tl (KED) | 0.013 ppb             | 1,796 cps         | 2.7 %         |
| 208Pb (KED) | 1.034 ppb             | 119,649 cps       | 3.4 %         |
| 209Bi (KED) | 77.815 %              | 2,778,358 cps     | 0.3 %         |
| 232Th (KED) | 0.226 ppb             | 40,607 cps        | 0.9 %         |
| 238U (KED)  | 0.074 ppb             | 16,074 cps        | 3.6 %         |

# Comprehensive

9/7/2021 4:53:36 PM

## Sample Summary

Instrument ID: iCAP Q

Analysis index: 21

Analysis name: 19304ti

Analysis started at: 9/7/2021 4:34:53 PM

User name: WINDOWS-UPCI4ER\Administrator

| Category    | Concentration average | Concentration RSD |
|-------------|-----------------------|-------------------|
| 6Li (KED)   | 136.734 %             | 6.3 %             |
| 9Be (KED)   | 0.015 ppb             | 297.6 %           |
| 11B (KED)   | -3.138 ppb            | 12.1 %            |
| 24Mg (KED)  | 770.598 ppb           | 5.7 %             |
| 27Al (KED)  | 769.236 ppb           | 2.2 %             |
| 45Sc (KED)  | 144.505 %             | 1.7 %             |
| 51V (KED)   | 1.525 ppb             | 2.2 %             |
| 52Cr (KED)  | 3.842 ppb             | 2.1 %             |
| 55Mn (KED)  | 21.409 ppb            | 1.2 %             |
| 56Fe (KED)  | 881.752 ppb           | 3.2 %             |
| 58Ni (KED)  | 3.793 ppb             | 3.1 %             |
| 59Co (KED)  | 0.425 ppb             | 2.3 %             |
| 63Cu (KED)  | 13.392 ppb            | 1.9 %             |
| 64Zn (KED)  | 170.618 ppb           | 3.1 %             |
| 69Ga (KED)  | 2.923 ppb             | 3.8 %             |
| 75As (KED)  | 0.612 ppb             | 4.6 %             |
| 80Se (KED)  | 0.816 ppb             | 8.9 %             |
| 85Rb (KED)  | 2.801 ppb             | 0.4 %             |
| 88Sr (KED)  | 10.067 ppb            | 2.2 %             |
| 89Y (KED)   | 127.449 %             | 1.5 %             |
| 107Ag (KED) | 0.073 ppb             | 5.4 %             |
| 114Cd (KED) | 0.057 ppb             | 12.7 %            |
| 115In (KED) | 105.909 %             | 2.0 %             |
| 133Cs (KED) | 0.171 ppb             | 4.7 %             |
| 138Ba (KED) | 10.101 ppb            | 3.5 %             |
| 139La (KED) | 0.718 ppb             | 3.2 %             |
| 140Ce (KED) | 1.475 ppb             | 3.3 %             |
| 141Pr (KED) | 0.166 ppb             | 2.1 %             |
| 142Nd (KED) | 0.900 ppb             | 4.1 %             |
| 152Sm (KED) | 0.120 ppb             | 4.8 %             |
| 153Eu (KED) | 0.022 ppb             | 3.3 %             |
| 158Gd (KED) | 0.107 ppb             | 2.3 %             |
| 159Tb (KED) | 104.688 %             | 2.3 %             |
| 164Dy (KED) | 0.070 ppb             | 2.1 %             |
| 166Er (KED) | 0.032 ppb             | 1.6 %             |
| 169Tm (KED) | 0.005 ppb             | 6.3 %             |
| 174Yb (KED) | 0.027 ppb             | 3.4 %             |
| 175Lu (KED) | -0.445 ppb            | 0.8 %             |
| 205Tl (KED) | 0.013 ppb             | 3.7 %             |
| 208Pb (KED) | 2.218 ppb             | 1.7 %             |
| 209Bi (KED) | 80.247 %              | 0.8 %             |
| 232Th (KED) | 0.283 ppb             | 2.9 %             |
| 238U (KED)  | 0.073 ppb             | 2.3 %             |

| Category   | Concentration average | Intensity average | Intensity RSD |
|------------|-----------------------|-------------------|---------------|
| 6Li (KED)  | 136.734 %             | 2,983 cps         | 6.3 %         |
| 9Be (KED)  | 0.015 ppb             | 3 cps             | 173.2 %       |
| 11B (KED)  | -3.138 ppb            | 454 cps           | 11.9 %        |
| 24Mg (KED) | 770.598 ppb           | 336,719 cps       | 0.7 %         |
| 27Al (KED) | 769.236 ppb           | 73,158 cps        | 0.8 %         |

# Comprehensive

9/7/2021 4:53:36 PM

| Category    | Concentration average | Intensity average | Intensity RSD |
|-------------|-----------------------|-------------------|---------------|
| 45Sc (KED)  | 144.505 %             | 34,839 cps        | 1.7 %         |
| 51V (KED)   | 1.525 ppb             | 10,212 cps        | 2.5 %         |
| 52Cr (KED)  | 3.842 ppb             | 41,735 cps        | 0.4 %         |
| 55Mn (KED)  | 21.409 ppb            | 104,127 cps       | 0.6 %         |
| 56Fe (KED)  | 881.752 ppb           | 8,520,947 cps     | 2.0 %         |
| 58Ni (KED)  | 3.793 ppb             | 53,122 cps        | 1.6 %         |
| 59Co (KED)  | 0.425 ppb             | 9,487 cps         | 1.5 %         |
| 63Cu (KED)  | 13.392 ppb            | 199,141 cps       | 0.5 %         |
| 64Zn (KED)  | 170.618 ppb           | 601,205 cps       | 1.9 %         |
| 69Ga (KED)  | 2.923 ppb             | 12,080 cps        | 3.3 %         |
| 75As (KED)  | 0.612 ppb             | 607 cps           | 3.3 %         |
| 80Se (KED)  | 0.816 ppb             | 614 cps           | 4.4 %         |
| 85Rb (KED)  | 2.801 ppb             | 10,482 cps        | 1.3 %         |
| 88Sr (KED)  | 10.067 ppb            | 53,304 cps        | 0.7 %         |
| 89Y (KED)   | 127.449 %             | 303,163 cps       | 1.5 %         |
| 107Ag (KED) | 0.073 ppb             | 3,020 cps         | 4.4 %         |
| 114Cd (KED) | 0.057 ppb             | 926 cps           | 9.5 %         |
| 115In (KED) | 105.909 %             | 539,215 cps       | 2.0 %         |
| 133Cs (KED) | 0.171 ppb             | 3,167 cps         | 3.6 %         |
| 138Ba (KED) | 10.101 ppb            | 271,561 cps       | 1.4 %         |
| 139La (KED) | 0.718 ppb             | 41,755 cps        | 1.1 %         |
| 140Ce (KED) | 1.475 ppb             | 119,311 cps       | 1.1 %         |
| 141Pr (KED) | 0.166 ppb             | 13,850 cps        | 0.3 %         |
| 142Nd (KED) | 0.900 ppb             | 30,889 cps        | 2.1 %         |
| 152Sm (KED) | 0.120 ppb             | 4,054 cps         | 3.0 %         |
| 153Eu (KED) | 0.022 ppb             | 1,493 cps         | 3.8 %         |
| 158Gd (KED) | 0.107 ppb             | 5,387 cps         | 2.0 %         |
| 159Tb (KED) | 104.688 %             | 3,499,952 cps     | 2.3 %         |
| 164Dy (KED) | 0.070 ppb             | 3,841 cps         | 0.6 %         |
| 166Er (KED) | 0.032 ppb             | 2,539 cps         | 3.0 %         |
| 169Tm (KED) | 0.005 ppb             | 1,137 cps         | 3.9 %         |
| 174Yb (KED) | 0.027 ppb             | 2,369 cps         | 4.2 %         |
| 175Lu (KED) | -0.445 ppb            | 18,382 cps        | 2.2 %         |
| 205Tl (KED) | 0.013 ppb             | 1,931 cps         | 3.2 %         |
| 208Pb (KED) | 2.218 ppb             | 243,962 cps       | 1.1 %         |
| 209Bi (KED) | 80.247 %              | 2,865,178 cps     | 0.8 %         |
| 232Th (KED) | 0.283 ppb             | 52,511 cps        | 3.4 %         |
| 238U (KED)  | 0.073 ppb             | 16,380 cps        | 1.7 %         |

# Comprehensive

9/7/2021 4:53:36 PM

## Sample Summary

Instrument ID: iCAP Q

Analysis index: 22

Analysis name: 19-1fu

Analysis started at: 9/7/2021 4:38:32 PM

User name: WINDOWS-UPCI4ER\Administrator

| Category    | Concentration average | Concentration RSD |
|-------------|-----------------------|-------------------|
| 6Li (KED)   | 135.970 %             | 3.7 %             |
| 9Be (KED)   | 0.029 ppb             | 46.6 %            |
| 11B (KED)   | -1.433 ppb            | 46.6 %            |
| 24Mg (KED)  | 559.224 ppb           | 3.7 %             |
| 27Al (KED)  | 569.316 ppb           | 1.0 %             |
| 45Sc (KED)  | 144.464 %             | 0.4 %             |
| 51V (KED)   | 1.130 ppb             | 0.5 %             |
| 52Cr (KED)  | 2.594 ppb             | 1.6 %             |
| 55Mn (KED)  | 14.654 ppb            | 1.3 %             |
| 56Fe (KED)  | 594.146 ppb           | 1.5 %             |
| 58Ni (KED)  | 2.632 ppb             | 1.9 %             |
| 59Co (KED)  | 0.267 ppb             | 2.0 %             |
| 63Cu (KED)  | 3.100 ppb             | 1.1 %             |
| 64Zn (KED)  | 194.506 ppb           | 1.6 %             |
| 69Ga (KED)  | 2.131 ppb             | 3.1 %             |
| 75As (KED)  | 0.529 ppb             | 14.1 %            |
| 80Se (KED)  | 1.538 ppb             | 5.1 %             |
| 85Rb (KED)  | 2.067 ppb             | 1.2 %             |
| 88Sr (KED)  | 9.022 ppb             | 0.8 %             |
| 89Y (KED)   | 126.927 %             | 0.6 %             |
| 107Ag (KED) | 0.088 ppb             | 0.9 %             |
| 114Cd (KED) | 0.074 ppb             | 2.0 %             |
| 115In (KED) | 108.000 %             | 0.7 %             |
| 133Cs (KED) | 0.131 ppb             | 3.3 %             |
| 138Ba (KED) | 7.645 ppb             | 2.0 %             |
| 139La (KED) | 0.480 ppb             | 2.7 %             |
| 140Ce (KED) | 1.020 ppb             | 0.8 %             |
| 141Pr (KED) | 0.112 ppb             | 0.8 %             |
| 142Nd (KED) | 0.626 ppb             | 1.3 %             |
| 152Sm (KED) | 0.086 ppb             | 2.6 %             |
| 153Eu (KED) | 0.018 ppb             | 1.5 %             |
| 158Gd (KED) | 0.075 ppb             | 0.7 %             |
| 159Tb (KED) | 107.226 %             | 1.3 %             |
| 164Dy (KED) | 0.050 ppb             | 3.3 %             |
| 166Er (KED) | 0.023 ppb             | 6.6 %             |
| 169Tm (KED) | 0.003 ppb             | 8.5 %             |
| 174Yb (KED) | 0.019 ppb             | 0.5 %             |
| 175Lu (KED) | -0.448 ppb            | 0.5 %             |
| 205Tl (KED) | 0.008 ppb             | 6.4 %             |
| 208Pb (KED) | 0.747 ppb             | 4.3 %             |
| 209Bi (KED) | 83.766 %              | 2.1 %             |
| 232Th (KED) | 0.174 ppb             | 1.6 %             |
| 238U (KED)  | 0.065 ppb             | 1.6 %             |

| Category   | Concentration average | Intensity average | Intensity RSD |
|------------|-----------------------|-------------------|---------------|
| 6Li (KED)  | 135.970 %             | 2,966 cps         | 3.7 %         |
| 9Be (KED)  | 0.029 ppb             | 6 cps             | 34.6 %        |
| 11B (KED)  | -1.433 ppb            | 567 cps           | 8.2 %         |
| 24Mg (KED) | 559.224 ppb           | 243,453 cps       | 0.3 %         |
| 27Al (KED) | 569.316 ppb           | 54,168 cps        | 0.7 %         |

# Comprehensive

9/7/2021 4:53:36 PM

| Category    | Concentration average | Intensity average | Intensity RSD |
|-------------|-----------------------|-------------------|---------------|
| 45Sc (KED)  | 144.464 %             | 34,829 cps        | 0.4 %         |
| 51V (KED)   | 1.130 ppb             | 7,571 cps         | 0.9 %         |
| 52Cr (KED)  | 2.594 ppb             | 28,224 cps        | 1.2 %         |
| 55Mn (KED)  | 14.654 ppb            | 71,317 cps        | 1.7 %         |
| 56Fe (KED)  | 594.146 ppb           | 5,743,169 cps     | 1.1 %         |
| 58Ni (KED)  | 2.632 ppb             | 37,482 cps        | 1.5 %         |
| 59Co (KED)  | 0.267 ppb             | 6,036 cps         | 2.1 %         |
| 63Cu (KED)  | 3.100 ppb             | 47,072 cps        | 0.8 %         |
| 64Zn (KED)  | 194.506 ppb           | 682,438 cps       | 1.2 %         |
| 69Ga (KED)  | 2.131 ppb             | 8,794 cps         | 2.6 %         |
| 75As (KED)  | 0.529 ppb             | 523 cps           | 13.3 %        |
| 80Se (KED)  | 1.538 ppb             | 814 cps           | 3.3 %         |
| 85Rb (KED)  | 2.067 ppb             | 7,718 cps         | 1.7 %         |
| 88Sr (KED)  | 9.022 ppb             | 47,602 cps        | 0.7 %         |
| 89Y (KED)   | 126.927 %             | 301,921 cps       | 0.6 %         |
| 107Ag (KED) | 0.088 ppb             | 3,687 cps         | 1.5 %         |
| 114Cd (KED) | 0.074 ppb             | 1,183 cps         | 1.8 %         |
| 115In (KED) | 108.000 %             | 549,857 cps       | 0.7 %         |
| 133Cs (KED) | 0.131 ppb             | 2,485 cps         | 2.6 %         |
| 138Ba (KED) | 7.645 ppb             | 210,980 cps       | 1.0 %         |
| 139La (KED) | 0.480 ppb             | 28,624 cps        | 1.5 %         |
| 140Ce (KED) | 1.020 ppb             | 84,669 cps        | 0.6 %         |
| 141Pr (KED) | 0.112 ppb             | 9,625 cps         | 2.1 %         |
| 142Nd (KED) | 0.626 ppb             | 22,064 cps        | 2.3 %         |
| 152Sm (KED) | 0.086 ppb             | 2,981 cps         | 1.4 %         |
| 153Eu (KED) | 0.018 ppb             | 1,211 cps         | 2.2 %         |
| 158Gd (KED) | 0.075 ppb             | 3,880 cps         | 1.5 %         |
| 159Tb (KED) | 107.226 %             | 3,584,773 cps     | 1.3 %         |
| 164Dy (KED) | 0.050 ppb             | 2,808 cps         | 3.1 %         |
| 166Er (KED) | 0.023 ppb             | 2,022 cps         | 5.6 %         |
| 169Tm (KED) | 0.003 ppb             | 722 cps           | 9.5 %         |
| 174Yb (KED) | 0.019 ppb             | 1,730 cps         | 1.5 %         |
| 175Lu (KED) | -0.448 ppb            | 18,486 cps        | 0.1 %         |
| 205Tl (KED) | 0.008 ppb             | 1,292 cps         | 5.9 %         |
| 208Pb (KED) | 0.747 ppb             | 98,223 cps        | 2.6 %         |
| 209Bi (KED) | 83.766 %              | 2,990,820 cps     | 2.1 %         |
| 232Th (KED) | 0.174 ppb             | 33,781 cps        | 1.9 %         |
| 238U (KED)  | 0.065 ppb             | 15,356 cps        | 0.6 %         |

# Comprehensive

9/7/2021 4:53:36 PM

## Sample Summary

Instrument ID: iCAP Q

Analysis index: 23

Analysis name: 19-20fu

Analysis started at: 9/7/2021 4:42:04 PM

User name: WINDOWS-UPCI4ER\Administrator

| Category    | Concentration average | Concentration RSD |
|-------------|-----------------------|-------------------|
| 6Li (KED)   | 132.709 %             | 1.6 %             |
| 9Be (KED)   | 0.014 ppb             | 175.3 %           |
| 11B (KED)   | 0.456 ppb             | 70.8 %            |
| 24Mg (KED)  | 474.173 ppb           | 2.7 %             |
| 27Al (KED)  | 528.540 ppb           | 2.4 %             |
| 45Sc (KED)  | 138.170 %             | 0.2 %             |
| 51V (KED)   | 1.061 ppb             | 2.8 %             |
| 52Cr (KED)  | 3.460 ppb             | 1.3 %             |
| 55Mn (KED)  | 14.348 ppb            | 0.4 %             |
| 56Fe (KED)  | 712.736 ppb           | 0.7 %             |
| 58Ni (KED)  | 3.190 ppb             | 1.1 %             |
| 59Co (KED)  | 0.291 ppb             | 4.1 %             |
| 63Cu (KED)  | 4.237 ppb             | 1.9 %             |
| 64Zn (KED)  | 189.647 ppb           | 1.3 %             |
| 69Ga (KED)  | 2.093 ppb             | 1.8 %             |
| 75As (KED)  | 0.644 ppb             | 6.1 %             |
| 80Se (KED)  | 0.980 ppb             | 17.3 %            |
| 85Rb (KED)  | 1.857 ppb             | 2.7 %             |
| 88Sr (KED)  | 7.177 ppb             | 1.7 %             |
| 89Y (KED)   | 124.823 %             | 1.5 %             |
| 107Ag (KED) | 0.091 ppb             | 4.9 %             |
| 114Cd (KED) | 0.046 ppb             | 12.0 %            |
| 115In (KED) | 108.908 %             | 1.4 %             |
| 133Cs (KED) | 0.120 ppb             | 4.7 %             |
| 138Ba (KED) | 7.467 ppb             | 0.5 %             |
| 139La (KED) | 0.441 ppb             | 1.2 %             |
| 140Ce (KED) | 0.905 ppb             | 1.9 %             |
| 141Pr (KED) | 0.106 ppb             | 0.6 %             |
| 142Nd (KED) | 0.563 ppb             | 2.2 %             |
| 152Sm (KED) | 0.073 ppb             | 5.3 %             |
| 153Eu (KED) | 0.016 ppb             | 4.6 %             |
| 158Gd (KED) | 0.069 ppb             | 1.5 %             |
| 159Tb (KED) | 109.057 %             | 0.6 %             |
| 164Dy (KED) | 0.049 ppb             | 4.5 %             |
| 166Er (KED) | 0.021 ppb             | 5.8 %             |
| 169Tm (KED) | 0.003 ppb             | 6.9 %             |
| 174Yb (KED) | 0.017 ppb             | 4.8 %             |
| 175Lu (KED) | -0.453 ppb            | 1.3 %             |
| 205Tl (KED) | 0.009 ppb             | 6.7 %             |
| 208Pb (KED) | 1.239 ppb             | 3.3 %             |
| 209Bi (KED) | 85.392 %              | 2.4 %             |
| 232Th (KED) | 0.164 ppb             | 3.9 %             |
| 238U (KED)  | 0.066 ppb             | 3.1 %             |

| Category   | Concentration average | Intensity average | Intensity RSD |
|------------|-----------------------|-------------------|---------------|
| 6Li (KED)  | 132.709 %             | 2,895 cps         | 1.6 %         |
| 9Be (KED)  | 0.014 ppb             | 3 cps             | 100.0 %       |
| 11B (KED)  | 0.456 ppb             | 679 cps           | 3.8 %         |
| 24Mg (KED) | 474.173 ppb           | 201,664 cps       | 1.2 %         |
| 27Al (KED) | 528.540 ppb           | 48,105 cps        | 2.2 %         |

# Comprehensive

9/7/2021 4:53:36 PM

| Category    | Concentration average | Intensity average | Intensity RSD |
|-------------|-----------------------|-------------------|---------------|
| 45Sc (KED)  | 138.170 %             | 33,311 cps        | 0.2 %         |
| 51V (KED)   | 1.061 ppb             | 6,799 cps         | 2.8 %         |
| 52Cr (KED)  | 3.460 ppb             | 35,955 cps        | 1.2 %         |
| 55Mn (KED)  | 14.348 ppb            | 66,789 cps        | 0.4 %         |
| 56Fe (KED)  | 712.736 ppb           | 6,588,625 cps     | 0.8 %         |
| 58Ni (KED)  | 3.190 ppb             | 43,043 cps        | 1.2 %         |
| 59Co (KED)  | 0.291 ppb             | 6,286 cps         | 4.0 %         |
| 63Cu (KED)  | 4.237 ppb             | 62,713 cps        | 0.8 %         |
| 64Zn (KED)  | 189.647 ppb           | 654,362 cps       | 0.5 %         |
| 69Ga (KED)  | 2.093 ppb             | 8,497 cps         | 0.6 %         |
| 75As (KED)  | 0.644 ppb             | 626 cps           | 6.2 %         |
| 80Se (KED)  | 0.980 ppb             | 647 cps           | 6.9 %         |
| 85Rb (KED)  | 1.857 ppb             | 6,821 cps         | 1.8 %         |
| 88Sr (KED)  | 7.177 ppb             | 37,280 cps        | 2.8 %         |
| 89Y (KED)   | 124.823 %             | 296,917 cps       | 1.5 %         |
| 107Ag (KED) | 0.091 ppb             | 3,849 cps         | 4.1 %         |
| 114Cd (KED) | 0.046 ppb             | 799 cps           | 9.2 %         |
| 115In (KED) | 108.908 %             | 554,481 cps       | 1.4 %         |
| 133Cs (KED) | 0.120 ppb             | 2,309 cps         | 5.7 %         |
| 138Ba (KED) | 7.467 ppb             | 209,649 cps       | 0.6 %         |
| 139La (KED) | 0.441 ppb             | 26,785 cps        | 0.9 %         |
| 140Ce (KED) | 0.905 ppb             | 76,492 cps        | 2.3 %         |
| 141Pr (KED) | 0.106 ppb             | 9,238 cps         | 1.1 %         |
| 142Nd (KED) | 0.563 ppb             | 20,176 cps        | 2.7 %         |
| 152Sm (KED) | 0.073 ppb             | 2,591 cps         | 5.6 %         |
| 153Eu (KED) | 0.016 ppb             | 1,094 cps         | 4.7 %         |
| 158Gd (KED) | 0.069 ppb             | 3,621 cps         | 1.8 %         |
| 159Tb (KED) | 109.057 %             | 3,646,005 cps     | 0.6 %         |
| 164Dy (KED) | 0.049 ppb             | 2,813 cps         | 3.8 %         |
| 166Er (KED) | 0.021 ppb             | 1,932 cps         | 3.9 %         |
| 169Tm (KED) | 0.003 ppb             | 663 cps           | 7.0 %         |
| 174Yb (KED) | 0.017 ppb             | 1,531 cps         | 4.0 %         |
| 175Lu (KED) | -0.453 ppb            | 18,161 cps        | 4.5 %         |
| 205Tl (KED) | 0.009 ppb             | 1,419 cps         | 6.2 %         |
| 208Pb (KED) | 1.239 ppb             | 153,428 cps       | 0.9 %         |
| 209Bi (KED) | 85.392 %              | 3,048,887 cps     | 2.4 %         |
| 232Th (KED) | 0.164 ppb             | 32,532 cps        | 1.5 %         |
| 238U (KED)  | 0.066 ppb             | 15,721 cps        | 2.2 %         |

# Comprehensive

9/7/2021 4:53:36 PM

## Sample Summary

Instrument ID: iCAP Q

Analysis index: 24

Analysis name: 19-10fu

Analysis started at: 9/7/2021 4:46:00 PM

User name: WINDOWS-UPCI4ER\Administrator

| Category    | Concentration average | Concentration RSD |
|-------------|-----------------------|-------------------|
| 6Li (KED)   | 130.977 %             | 1.8 %             |
| 9Be (KED)   | 0.014 ppb             | 3.2 %             |
| 11B (KED)   | 0.743 ppb             | 62.4 %            |
| 24Mg (KED)  | 474.992 ppb           | 2.8 %             |
| 27Al (KED)  | 472.552 ppb           | 0.7 %             |
| 45Sc (KED)  | 138.442 %             | 0.7 %             |
| 51V (KED)   | 0.920 ppb             | 5.1 %             |
| 52Cr (KED)  | 2.848 ppb             | 1.9 %             |
| 55Mn (KED)  | 11.826 ppb            | 1.9 %             |
| 56Fe (KED)  | 496.341 ppb           | 2.0 %             |
| 58Ni (KED)  | 2.423 ppb             | 1.9 %             |
| 59Co (KED)  | 0.226 ppb             | 3.6 %             |
| 63Cu (KED)  | 4.871 ppb             | 2.3 %             |
| 64Zn (KED)  | 183.841 ppb           | 2.1 %             |
| 69Ga (KED)  | 1.784 ppb             | 2.0 %             |
| 75As (KED)  | 0.464 ppb             | 12.7 %            |
| 80Se (KED)  | 1.125 ppb             | 15.9 %            |
| 85Rb (KED)  | 3.759 ppb             | 0.3 %             |
| 88Sr (KED)  | 7.620 ppb             | 3.3 %             |
| 89Y (KED)   | 125.361 %             | 0.8 %             |
| 107Ag (KED) | 0.104 ppb             | 2.1 %             |
| 114Cd (KED) | 0.057 ppb             | 5.6 %             |
| 115In (KED) | 109.571 %             | 1.5 %             |
| 133Cs (KED) | 0.101 ppb             | 2.3 %             |
| 138Ba (KED) | 6.478 ppb             | 1.7 %             |
| 139La (KED) | 0.395 ppb             | 2.7 %             |
| 140Ce (KED) | 0.836 ppb             | 1.5 %             |
| 141Pr (KED) | 0.095 ppb             | 2.6 %             |
| 142Nd (KED) | 0.508 ppb             | 1.0 %             |
| 152Sm (KED) | 0.069 ppb             | 1.8 %             |
| 153Eu (KED) | 0.015 ppb             | 2.5 %             |
| 158Gd (KED) | 0.061 ppb             | 9.2 %             |
| 159Tb (KED) | 108.206 %             | 0.9 %             |
| 164Dy (KED) | 0.041 ppb             | 3.1 %             |
| 166Er (KED) | 0.017 ppb             | 12.0 %            |
| 169Tm (KED) | 0.003 ppb             | 7.9 %             |
| 174Yb (KED) | 0.014 ppb             | 5.0 %             |
| 175Lu (KED) | -0.454 ppb            | 1.4 %             |
| 205Tl (KED) | 0.008 ppb             | 3.3 %             |
| 208Pb (KED) | 0.753 ppb             | 2.4 %             |
| 209Bi (KED) | 85.088 %              | 1.0 %             |
| 232Th (KED) | 0.147 ppb             | 2.1 %             |
| 238U (KED)  | 0.054 ppb             | 3.6 %             |

| Category   | Concentration average | Intensity average | Intensity RSD |
|------------|-----------------------|-------------------|---------------|
| 6Li (KED)  | 130.977 %             | 2,857 cps         | 1.8 %         |
| 9Be (KED)  | 0.014 ppb             | 3 cps             | 0.0 %         |
| 11B (KED)  | 0.743 ppb             | 689 cps           | 5.2 %         |
| 24Mg (KED) | 474.992 ppb           | 199,365 cps       | 0.9 %         |
| 27Al (KED) | 472.552 ppb           | 43,105 cps        | 0.8 %         |

# Comprehensive

9/7/2021 4:53:36 PM

| Category    | Concentration average | Intensity average | Intensity RSD |
|-------------|-----------------------|-------------------|---------------|
| 45Sc (KED)  | 138.442 %             | 33,377 cps        | 0.7 %         |
| 51V (KED)   | 0.920 ppb             | 5,905 cps         | 4.6 %         |
| 52Cr (KED)  | 2.848 ppb             | 29,675 cps        | 1.2 %         |
| 55Mn (KED)  | 11.826 ppb            | 55,184 cps        | 1.2 %         |
| 56Fe (KED)  | 496.341 ppb           | 4,598,333 cps     | 1.4 %         |
| 58Ni (KED)  | 2.423 ppb             | 33,229 cps        | 1.8 %         |
| 59Co (KED)  | 0.226 ppb             | 4,933 cps         | 3.1 %         |
| 63Cu (KED)  | 4.871 ppb             | 72,188 cps        | 1.5 %         |
| 64Zn (KED)  | 183.841 ppb           | 637,122 cps       | 1.3 %         |
| 69Ga (KED)  | 1.784 ppb             | 7,283 cps         | 1.2 %         |
| 75As (KED)  | 0.464 ppb             | 454 cps           | 13.3 %        |
| 80Se (KED)  | 1.125 ppb             | 690 cps           | 7.8 %         |
| 85Rb (KED)  | 3.759 ppb             | 13,819 cps        | 0.6 %         |
| 88Sr (KED)  | 7.620 ppb             | 39,730 cps        | 2.5 %         |
| 89Y (KED)   | 125.361 %             | 298,195 cps       | 0.8 %         |
| 107Ag (KED) | 0.104 ppb             | 4,427 cps         | 0.8 %         |
| 114Cd (KED) | 0.057 ppb             | 958 cps           | 5.3 %         |
| 115In (KED) | 109.571 %             | 557,855 cps       | 1.5 %         |
| 133Cs (KED) | 0.101 ppb             | 1,946 cps         | 3.5 %         |
| 138Ba (KED) | 6.478 ppb             | 180,668 cps       | 1.4 %         |
| 139La (KED) | 0.395 ppb             | 23,788 cps        | 2.0 %         |
| 140Ce (KED) | 0.836 ppb             | 70,166 cps        | 1.1 %         |
| 141Pr (KED) | 0.095 ppb             | 8,180 cps         | 1.8 %         |
| 142Nd (KED) | 0.508 ppb             | 18,075 cps        | 1.6 %         |
| 152Sm (KED) | 0.069 ppb             | 2,409 cps         | 1.0 %         |
| 153Eu (KED) | 0.015 ppb             | 1,051 cps         | 1.9 %         |
| 158Gd (KED) | 0.061 ppb             | 3,159 cps         | 8.5 %         |
| 159Tb (KED) | 108.206 %             | 3,617,541 cps     | 0.9 %         |
| 164Dy (KED) | 0.041 ppb             | 2,331 cps         | 3.5 %         |
| 166Er (KED) | 0.017 ppb             | 1,612 cps         | 8.0 %         |
| 169Tm (KED) | 0.003 ppb             | 646 cps           | 8.5 %         |
| 174Yb (KED) | 0.014 ppb             | 1,302 cps         | 4.1 %         |
| 175Lu (KED) | -0.454 ppb            | 17,997 cps        | 5.0 %         |
| 205Tl (KED) | 0.008 ppb             | 1,209 cps         | 2.3 %         |
| 208Pb (KED) | 0.753 ppb             | 100,420 cps       | 1.5 %         |
| 209Bi (KED) | 85.088 %              | 3,038,025 cps     | 1.0 %         |
| 232Th (KED) | 0.147 ppb             | 29,068 cps        | 1.2 %         |
| 238U (KED)  | 0.054 ppb             | 13,003 cps        | 4.4 %         |

# Comprehensive

9/7/2021 4:53:36 PM

## Sample Summary

Instrument ID: iCAP Q

Analysis index: 25

Analysis name: 028729ti

Analysis started at: 9/7/2021 4:49:59 PM

User name: WINDOWS-UPCI4ER\Administrator

| Category    | Concentration average | Concentration RSD |
|-------------|-----------------------|-------------------|
| 6Li (KED)   | 139.587 %             | 0.8 %             |
| 9Be (KED)   | 0.028 ppb             | 96.0 %            |
| 11B (KED)   | 9.045 ppb             | 8.2 %             |
| 24Mg (KED)  | 1,125.022 ppb         | 0.9 %             |
| 27Al (KED)  | 1,240.882 ppb         | 2.6 %             |
| 45Sc (KED)  | 145.513 %             | 1.7 %             |
| 51V (KED)   | 2.397 ppb             | 1.8 %             |
| 52Cr (KED)  | 4.026 ppb             | 1.0 %             |
| 55Mn (KED)  | 30.814 ppb            | 1.8 %             |
| 56Fe (KED)  | 1,236.142 ppb         | 1.8 %             |
| 58Ni (KED)  | 5.948 ppb             | 1.0 %             |
| 59Co (KED)  | 0.604 ppb             | 2.9 %             |
| 63Cu (KED)  | 11.401 ppb            | 1.3 %             |
| 64Zn (KED)  | 162.029 ppb           | 1.3 %             |
| 69Ga (KED)  | 3.375 ppb             | 1.1 %             |
| 75As (KED)  | 0.900 ppb             | 8.9 %             |
| 80Se (KED)  | 1.059 ppb             | 6.8 %             |
| 85Rb (KED)  | 2.807 ppb             | 1.6 %             |
| 88Sr (KED)  | 14.785 ppb            | 0.7 %             |
| 89Y (KED)   | 127.975 %             | 0.5 %             |
| 107Ag (KED) | 0.084 ppb             | 1.7 %             |
| 114Cd (KED) | 0.072 ppb             | 10.8 %            |
| 115In (KED) | 109.460 %             | 0.9 %             |
| 133Cs (KED) | 0.264 ppb             | 0.8 %             |
| 138Ba (KED) | 11.834 ppb            | 0.3 %             |
| 139La (KED) | 0.950 ppb             | 1.4 %             |
| 140Ce (KED) | 1.990 ppb             | 1.0 %             |
| 141Pr (KED) | 0.222 ppb             | 0.6 %             |
| 142Nd (KED) | 1.221 ppb             | 2.5 %             |
| 152Sm (KED) | 0.165 ppb             | 2.9 %             |
| 153Eu (KED) | 0.034 ppb             | 2.5 %             |
| 158Gd (KED) | 0.148 ppb             | 3.1 %             |
| 159Tb (KED) | 107.150 %             | 0.5 %             |
| 164Dy (KED) | 0.104 ppb             | 3.2 %             |
| 166Er (KED) | 0.049 ppb             | 6.4 %             |
| 169Tm (KED) | 0.006 ppb             | 3.8 %             |
| 174Yb (KED) | 0.038 ppb             | 3.9 %             |
| 175Lu (KED) | -0.448 ppb            | 2.0 %             |
| 205Tl (KED) | 0.022 ppb             | 7.6 %             |
| 208Pb (KED) | 2.088 ppb             | 3.2 %             |
| 209Bi (KED) | 83.932 %              | 3.0 %             |
| 232Th (KED) | 0.386 ppb             | 2.6 %             |
| 238U (KED)  | 0.188 ppb             | 1.8 %             |

| Category   | Concentration average | Intensity average | Intensity RSD |
|------------|-----------------------|-------------------|---------------|
| 6Li (KED)  | 139.587 %             | 3,045 cps         | 0.8 %         |
| 9Be (KED)  | 0.028 ppb             | 6 cps             | 69.3 %        |
| 11B (KED)  | 9.045 ppb             | 1,315 cps         | 4.5 %         |
| 24Mg (KED) | 1,125.022 ppb         | 502,857 cps       | 1.6 %         |
| 27Al (KED) | 1,240.882 ppb         | 118,767 cps       | 1.3 %         |

# Comprehensive

9/7/2021 4:53:36 PM

| Category    | Concentration average | Intensity average | Intensity RSD |
|-------------|-----------------------|-------------------|---------------|
| 45Sc (KED)  | 145.513 %             | 35,081 cps        | 1.7 %         |
| 51V (KED)   | 2.397 ppb             | 16,162 cps        | 0.2 %         |
| 52Cr (KED)  | 4.026 ppb             | 44,036 cps        | 0.9 %         |
| 55Mn (KED)  | 30.814 ppb            | 150,827 cps       | 1.4 %         |
| 56Fe (KED)  | 1,236.142 ppb         | 12,029,576 cps    | 2.0 %         |
| 58Ni (KED)  | 5.948 ppb             | 82,736 cps        | 0.9 %         |
| 59Co (KED)  | 0.604 ppb             | 13,463 cps        | 2.2 %         |
| 63Cu (KED)  | 11.401 ppb            | 170,483 cps       | 0.9 %         |
| 64Zn (KED)  | 162.029 ppb           | 573,518 cps       | 0.9 %         |
| 69Ga (KED)  | 3.375 ppb             | 13,997 cps        | 1.4 %         |
| 75As (KED)  | 0.900 ppb             | 893 cps           | 8.7 %         |
| 80Se (KED)  | 1.059 ppb             | 686 cps           | 3.4 %         |
| 85Rb (KED)  | 2.807 ppb             | 10,549 cps        | 1.7 %         |
| 88Sr (KED)  | 14.785 ppb            | 78,540 cps        | 1.0 %         |
| 89Y (KED)   | 127.975 %             | 304,415 cps       | 0.5 %         |
| 107Ag (KED) | 0.084 ppb             | 3,556 cps         | 2.3 %         |
| 114Cd (KED) | 0.072 ppb             | 1,175 cps         | 10.1 %        |
| 115In (KED) | 109.460 %             | 557,292 cps       | 0.9 %         |
| 133Cs (KED) | 0.264 ppb             | 5,038 cps         | 0.6 %         |
| 138Ba (KED) | 11.834 ppb            | 325,525 cps       | 0.8 %         |
| 139La (KED) | 0.950 ppb             | 56,549 cps        | 1.3 %         |
| 140Ce (KED) | 1.990 ppb             | 164,723 cps       | 0.6 %         |
| 141Pr (KED) | 0.222 ppb             | 18,967 cps        | 0.4 %         |
| 142Nd (KED) | 1.221 ppb             | 42,904 cps        | 2.7 %         |
| 152Sm (KED) | 0.165 ppb             | 5,716 cps         | 2.3 %         |
| 153Eu (KED) | 0.034 ppb             | 2,308 cps         | 2.0 %         |
| 158Gd (KED) | 0.148 ppb             | 7,620 cps         | 3.5 %         |
| 159Tb (KED) | 107.150 %             | 3,582,228 cps     | 0.5 %         |
| 164Dy (KED) | 0.104 ppb             | 5,775 cps         | 3.5 %         |
| 166Er (KED) | 0.049 ppb             | 3,767 cps         | 6.0 %         |
| 169Tm (KED) | 0.006 ppb             | 1,505 cps         | 3.4 %         |
| 174Yb (KED) | 0.038 ppb             | 3,379 cps         | 3.8 %         |
| 175Lu (KED) | -0.448 ppb            | 18,510 cps        | 5.5 %         |
| 205Tl (KED) | 0.022 ppb             | 3,339 cps         | 4.7 %         |
| 208Pb (KED) | 2.088 ppb             | 241,161 cps       | 1.8 %         |
| 209Bi (KED) | 83.932 %              | 2,996,760 cps     | 3.0 %         |
| 232Th (KED) | 0.386 ppb             | 74,599 cps        | 1.8 %         |
| 238U (KED)  | 0.188 ppb             | 44,056 cps        | 1.2 %         |
