# Supplementary material for: Geographic and breed-specific traceability of cashmere via mineral element profiling in Inner Mongolia (Ordos, Chifeng, and Alxa League)
Source: Royal Society of Chemistry journal article supplement (doi:10.1039/d5ra08122j), 2026-01-01
Supplement: d5ra08122j1.zip [file 20210908-e qi 20.pdf › ԭʼ޿/20210908-e qi 20.pdf]

## Instrument Summary:

Instrument ID: iCAP Q  
Serial Number: Undefined

## Labbook Summary:

Path and filename: \_Application Data\Workspace\LabBooks\wlw\20210908-1.imexp  
Labbook created by: Administrator  
Based on template:  
Hardware configuration: iCAPQ1  
Labbook type: eQuant  
Qtegra version (last saved): 2.7.2425.154  
Labbook started: 9/8/2021 3:35:39 PM  
Labbook finished: 9/8/2021 5:02:19 PM

## Method Summary:

| Isotope     | Mode | Dwell time (s) | # of Channels | Spacing | Resolution | IS          |
|-------------|------|----------------|---------------|---------|------------|-------------|
| 6Li (KED)   | KED  | 0.03           | 3             | 0.1     | Normal     |             |
| 9Be (KED)   | KED  | 0.03           | 3             | 0.1     | Normal     | 6Li (KED)   |
| 11B (KED)   | KED  | 0.03           | 3             | 0.1     | Normal     | 6Li (KED)   |
| 24Mg (KED)  | KED  | 0.03           | 3             | 0.1     | Normal     | 6Li (KED)   |
| 27Al (KED)  | KED  | 0.03           | 3             | 0.1     | Normal     | 45Sc (KED)  |
| 45Sc (KED)  | KED  | 0.03           | 3             | 0.1     | Normal     |             |
| 51V (KED)   | KED  | 0.03           | 3             | 0.1     | Normal     | 45Sc (KED)  |
| 52Cr (KED)  | KED  | 0.03           | 3             | 0.1     | Normal     | 45Sc (KED)  |
| 55Mn (KED)  | KED  | 0.03           | 3             | 0.1     | Normal     | 45Sc (KED)  |
| 56Fe (KED)  | KED  | 0.03           | 3             | 0.1     | Normal     | 45Sc (KED)  |
| 58Ni (KED)  | KED  | 0.03           | 3             | 0.1     | Normal     | 45Sc (KED)  |
| 59Co (KED)  | KED  | 0.03           | 3             | 0.1     | Normal     | 45Sc (KED)  |
| 63Cu (KED)  | KED  | 0.03           | 3             | 0.1     | Normal     | 89Y (KED)   |
| 64Zn (KED)  | KED  | 0.03           | 3             | 0.1     | Normal     | 89Y (KED)   |
| 69Ga (KED)  | KED  | 0.03           | 3             | 0.1     | Normal     | 89Y (KED)   |
| 75As (KED)  | KED  | 0.03           | 3             | 0.1     | Normal     | 89Y (KED)   |
| 80Se (KED)  | KED  | 0.03           | 3             | 0.1     | Normal     | 89Y (KED)   |
| 85Rb (KED)  | KED  | 0.03           | 3             | 0.1     | Normal     | 89Y (KED)   |
| 88Sr (KED)  | KED  | 0.03           | 3             | 0.1     | Normal     | 89Y (KED)   |
| 89Y (KED)   | KED  | 0.03           | 3             | 0.1     | Normal     |             |
| 107Ag (KED) | KED  | 0.03           | 3             | 0.1     | Normal     | 115In (KED) |
| 114Cd (KED) | KED  | 0.03           | 3             | 0.1     | Normal     | 115In (KED) |
| 115In (KED) | KED  | 0.03           | 3             | 0.1     | Normal     |             |
| 133Cs (KED) | KED  | 0.03           | 3             | 0.1     | Normal     | 115In (KED) |
| 138Ba (KED) | KED  | 0.03           | 3             | 0.1     | Normal     | 159Tb (KED) |
| 139La (KED) | KED  | 0.03           | 3             | 0.1     | Normal     | 159Tb (KED) |
| 140Ce (KED) | KED  | 0.03           | 3             | 0.1     | Normal     | 159Tb (KED) |
| 141Pr (KED) | KED  | 0.03           | 3             | 0.1     | Normal     | 159Tb (KED) |
| 142Nd (KED) | KED  | 0.03           | 3             | 0.1     | Normal     | 159Tb (KED) |
| 152Sm (KED) | KED  | 0.03           | 3             | 0.1     | Normal     | 159Tb (KED) |
| 153Eu (KED) | KED  | 0.03           | 3             | 0.1     | Normal     | 159Tb (KED) |
| 158Gd (KED) | KED  | 0.03           | 3             | 0.1     | Normal     | 159Tb (KED) |
| 159Tb (KED) | KED  | 0.03           | 3             | 0.1     | Normal     |             |
| 164Dy (KED) | KED  | 0.03           | 3             | 0.1     | Normal     | 159Tb (KED) |
| 166Er (KED) | KED  | 0.03           | 3             | 0.1     | Normal     | 159Tb (KED) |
| 169Tm (KED) | KED  | 0.03           | 3             | 0.1     | Normal     | 159Tb (KED) |
| 174Yb (KED) | KED  | 0.03           | 3             | 0.1     | Normal     | 159Tb (KED) |
| 175Lu (KED) | KED  | 0.03           | 3             | 0.1     | Normal     | 159Tb (KED) |
| 205Tl (KED) | KED  | 0.03           | 3             | 0.1     | Normal     | 209Bi (KED) |
| 208Pb (KED) | KED  | 0.03           | 3             | 0.1     | Normal     | 209Bi (KED) |
| 209Bi (KED) | KED  | 0.03           | 3             | 0.1     | Normal     |             |
| 232Th (KED) | KED  | 0.03           | 3             | 0.1     | Normal     | 209Bi (KED) |
| 238U (KED)  | KED  | 0.03           | 3             | 0.1     | Normal     | 209Bi (KED) |

| Isotope     | Mode | Dwell time (s) | # of Channels | Spacing | Resolution |
|-------------|------|----------------|---------------|---------|------------|
| 6Li (KED)   | KED  | 0.03           | 3             | 0.1     | Normal     |
| 45Sc (KED)  | KED  | 0.03           | 3             | 0.1     | Normal     |
| 89Y (KED)   | KED  | 0.03           | 3             | 0.1     | Normal     |
| 115In (KED) | KED  | 0.03           | 3             | 0.1     | Normal     |
| 159Tb (KED) | KED  | 0.03           | 3             | 0.1     | Normal     |
| 209Bi (KED) | KED  | 0.03           | 3             | 0.1     | Normal     |

| No. of sweeps | Time per sweep[s] | Time per main run[s] |
|---------------|-------------------|----------------------|
| 10            | 3.87              | 38.7                 |

## Calibration Curves:

9Be (KED)

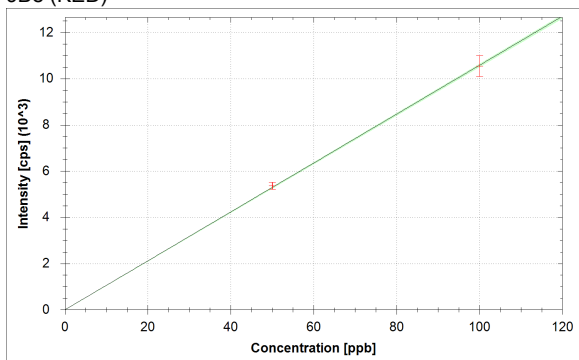

$$f(x) = 105.8088 \cdot x$$

$$R^2 = 0.9999$$

$$\text{BEC} = 0.000 \text{ ppb}$$

$$\text{LoD} = 0.0000 \text{ ppb}$$

11B (KED)

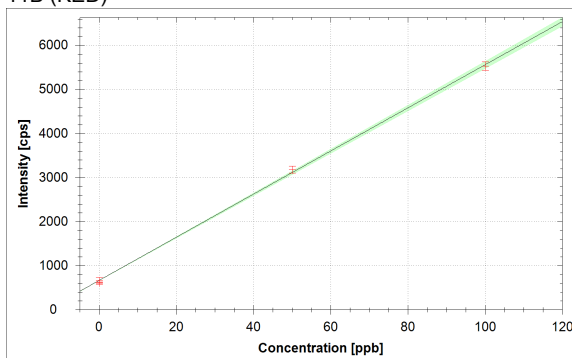

$$f(x) = 48.9620 \cdot x + 667.5115$$

$$R^2 = 0.9995$$

$$\text{BEC} = 13.633 \text{ ppb}$$

$$\text{LoD} = 1.6665 \text{ ppb}$$

24Mg (KED)

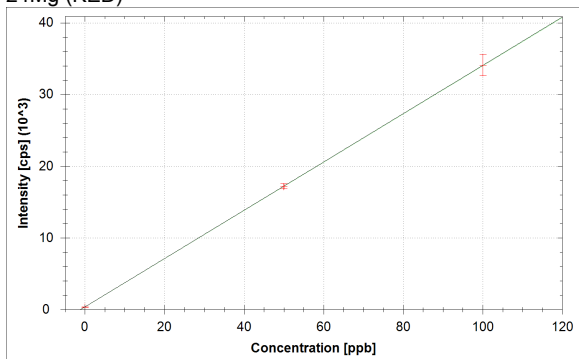

$$f(x) = 336.9577 \cdot x + 368.9779$$

$$R^2 = 1.0000$$

$$\text{BEC} = 1.095 \text{ ppb}$$

$$\text{LoD} = 0.3089 \text{ ppb}$$

27Al (KED)

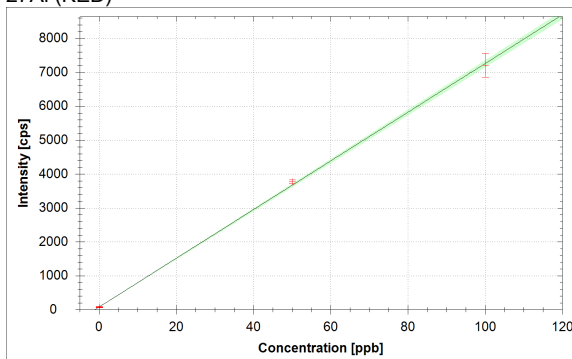

$$f(x) = 71.7881 \cdot x + 79.2775$$

$$R^2 = 0.9996$$

$$\text{BEC} = 1.104 \text{ ppb}$$

$$\text{LoD} = 0.7361 \text{ ppb}$$

51V (KED)

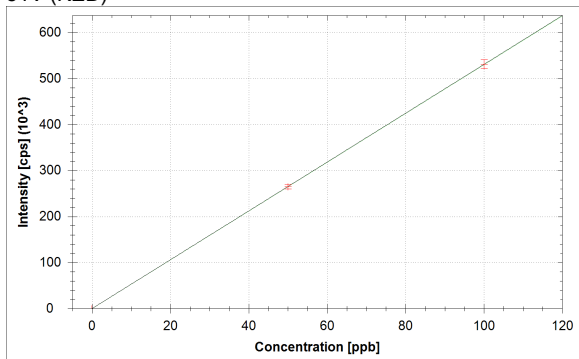

$$f(x) = 5306.6398 \cdot x + 8.6906$$

$$R^2 = 1.0000$$

$$\text{BEC} = 0.002 \text{ ppb}$$

$$\text{LoD} = 0.0019 \text{ ppb}$$

52Cr (KED)

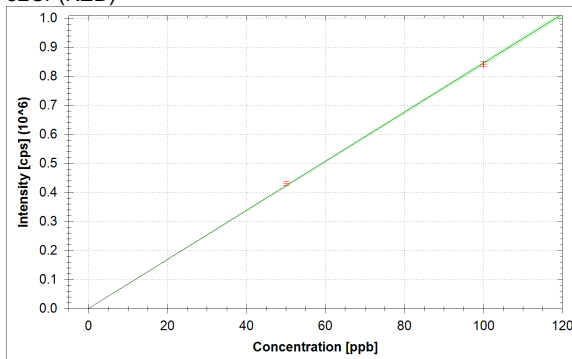

$$f(x) = 8452.0821 \cdot x + 121.6156$$

$$R^2 = 0.9999$$

$$\text{BEC} = 0.014 \text{ ppb}$$

$$\text{LoD} = 0.0029 \text{ ppb}$$

55Mn (KED)

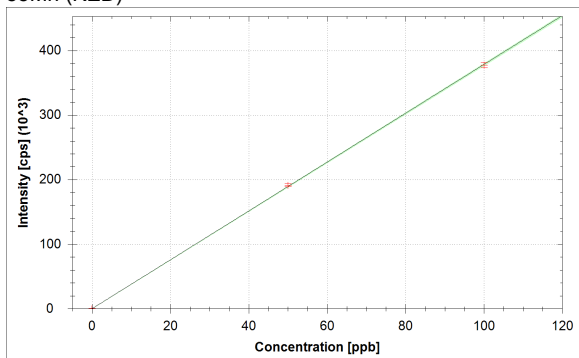

$$f(x) = 3783.6232 \cdot x + 115.1193$$

$$R^2 = 0.9999$$

$$\text{BEC} = 0.030 \text{ ppb}$$

$$\text{LoD} = 0.0220 \text{ ppb}$$

56Fe (KED)

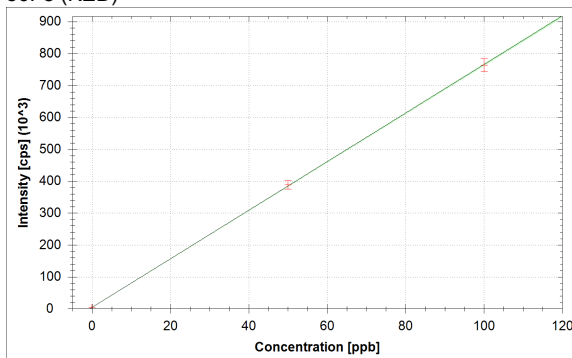

$$f(x) = 7613.0051 \cdot x + 4252.8298$$

$$R^2 = 1.0000$$

$$\text{BEC} = 0.559 \text{ ppb}$$

$$\text{LoD} = 0.1129 \text{ ppb}$$

58Ni (KED)

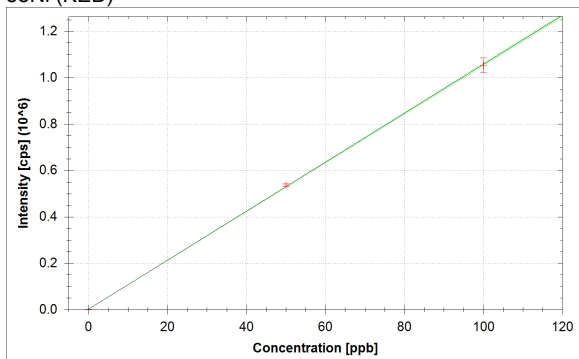

$$f(x) = 10557.1893 \cdot x + 1560.4107$$

$$R^2 = 0.9999$$

$$\text{BEC} = 0.148 \text{ ppb}$$

$$\text{LoD} = 0.0473 \text{ ppb}$$

59Co (KED)

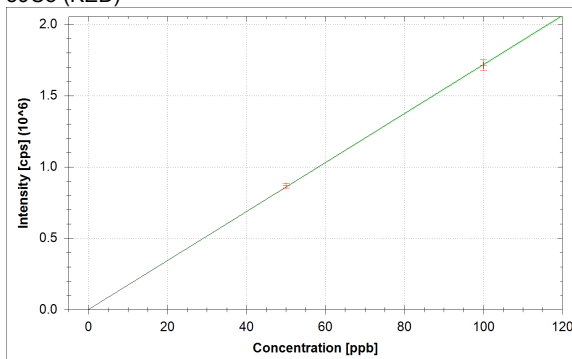

$$f(x) = 17163.0074 \cdot x + 194.3490$$

$$R^2 = 1.0000$$

$$\text{BEC} = 0.011 \text{ ppb}$$

$$\text{LoD} = 0.0033 \text{ ppb}$$

63Cu (KED)

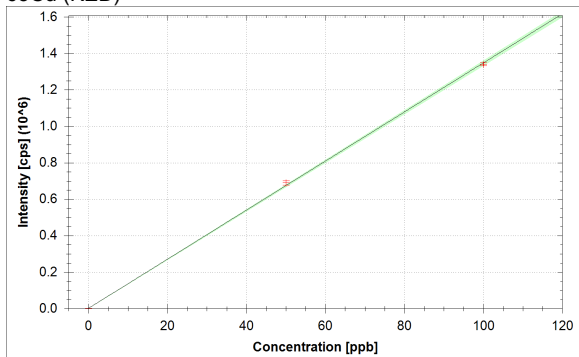

$$f(x) = 13460.2540 \cdot x + 1503.2526$$

$$R^2 = 0.9998$$

$$\text{BEC} = 0.112 \text{ ppb}$$

$$\text{LoD} = 0.0423 \text{ ppb}$$

64Zn (KED)

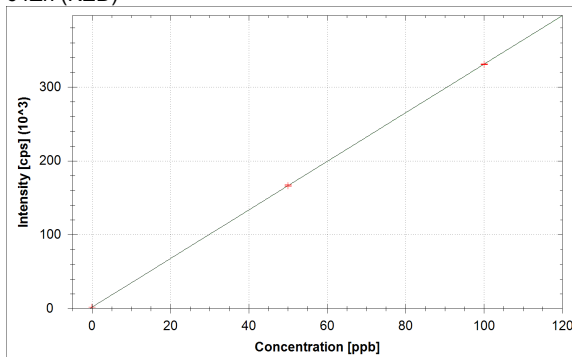

$$f(x) = 3289.6996 \cdot x + 1908.6520$$

$$R^2 = 1.0000$$

$$\text{BEC} = 0.580 \text{ ppb}$$

$$\text{LoD} = 0.0497 \text{ ppb}$$

69Ga (KED)

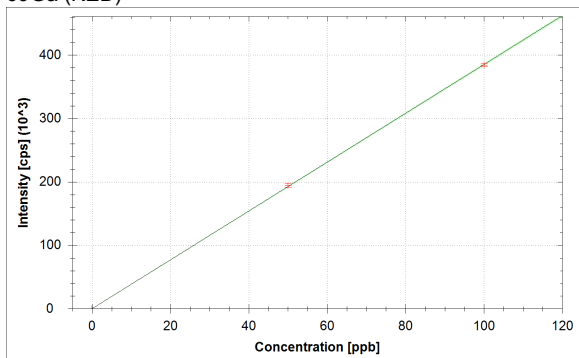

$$f(x) = 3849.2838 \cdot x + 78.3630$$

$$R^2 = 1.0000$$

$$\text{BEC} = 0.020 \text{ ppb}$$

$$\text{LoD} = 0.0167 \text{ ppb}$$

75As (KED)

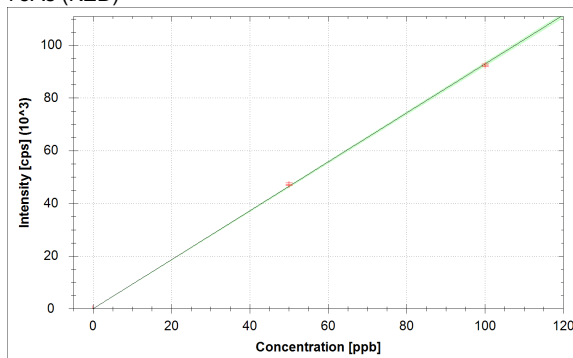

$$f(x) = 928.5671 \cdot x + 8.8273$$

$$R^2 = 0.9999$$

$$\text{BEC} = 0.010 \text{ ppb}$$

$$\text{LoD} = 0.0163 \text{ ppb}$$

80Se (KED)

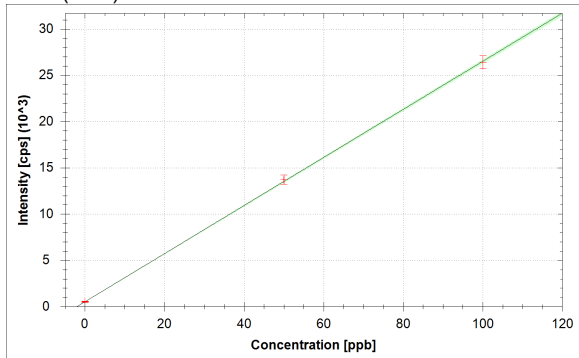

$$f(x) = 259.9206 \cdot x + 521.1385$$

$$R^2 = 0.9999$$

$$\text{BEC} = 2.005 \text{ ppb}$$

$$\text{LoD} = 0.6657 \text{ ppb}$$

85Rb (KED)

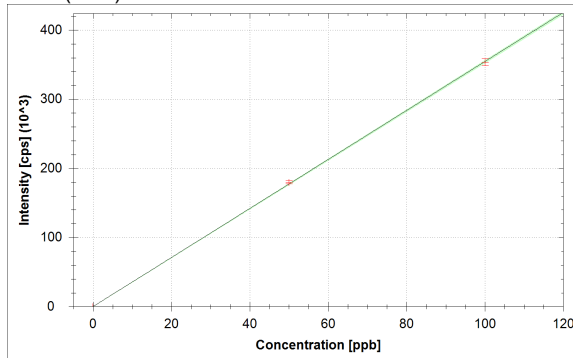

$$f(x) = 3545.1324 \cdot x + 60.7195$$

$$R^2 = 0.9999$$

$$\text{BEC} = 0.017 \text{ ppb}$$

$$\text{LoD} = 0.0015 \text{ ppb}$$

88Sr (KED)

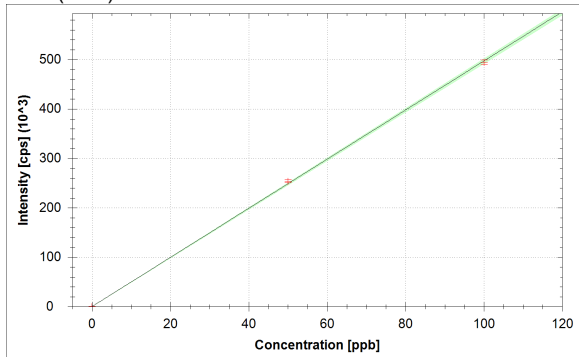

$$f(x) = 4971.0853 \cdot x + 153.3919$$

$$R^2 = 0.9998$$

$$\text{BEC} = 0.031 \text{ ppb}$$

$$\text{LoD} = 0.0204 \text{ ppb}$$

107Ag (KED)

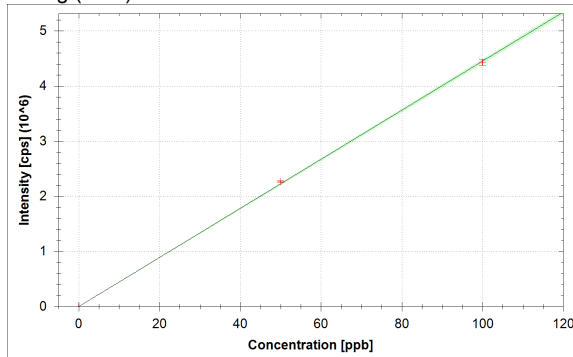

$$f(x) = 44504.4723 \cdot x + 38.7739$$

$$R^2 = 0.9999$$

$$\text{BEC} = 0.001 \text{ ppb}$$

$$\text{LoD} = 0.0003 \text{ ppb}$$

114Cd (KED)

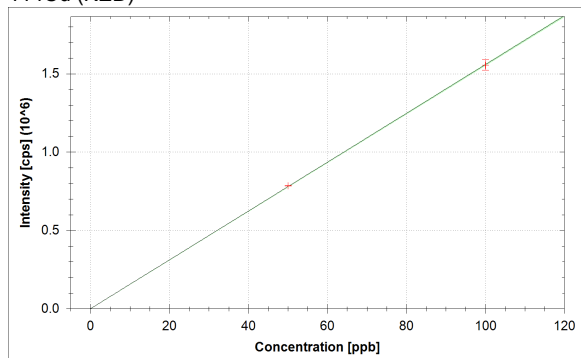

$$f(x) = 15576.3709 \cdot x + 155.1015$$

$$R^2 = 1.0000$$

$$\text{BEC} = 0.010 \text{ ppb}$$

$$\text{LoD} = 0.0010 \text{ ppb}$$

133Cs (KED)

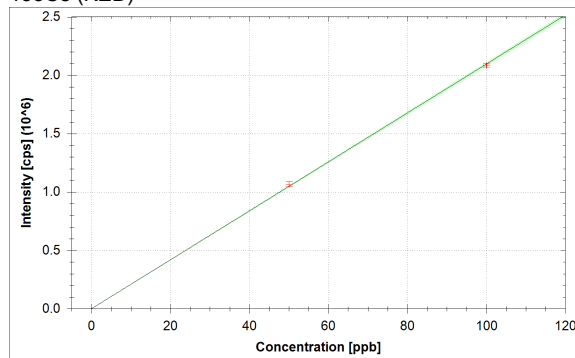

$$f(x) = 20960.4137 \cdot x + 44.1736$$

$$R^2 = 0.9999$$

$$\text{BEC} = 0.002 \text{ ppb}$$

$$\text{LoD} = 0.0021 \text{ ppb}$$

138Ba (KED)

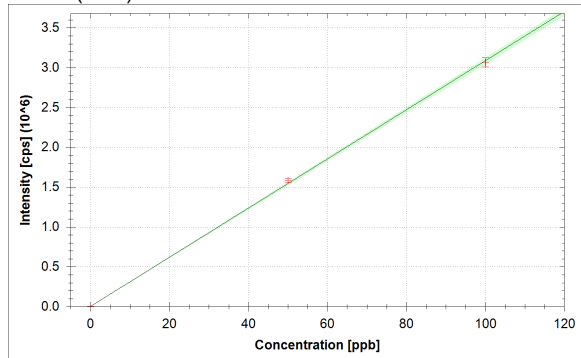

$$f(x) = 30853.1979 \cdot x + 1882.6878$$

$$R^2 = 0.9997$$

$$\text{BEC} = 0.061 \text{ ppb}$$

$$\text{LoD} = 0.0045 \text{ ppb}$$

139La (KED)

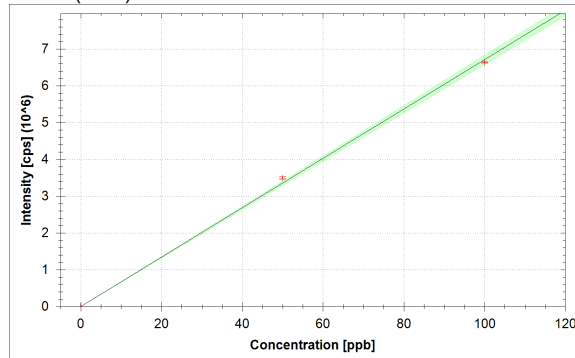

$$f(x) = 67107.9794 \cdot x + 147.3413$$

$$R^2 = 0.9992$$

$$\text{BEC} = 0.002 \text{ ppb}$$

$$\text{LoD} = 0.0007 \text{ ppb}$$

140Ce (KED)

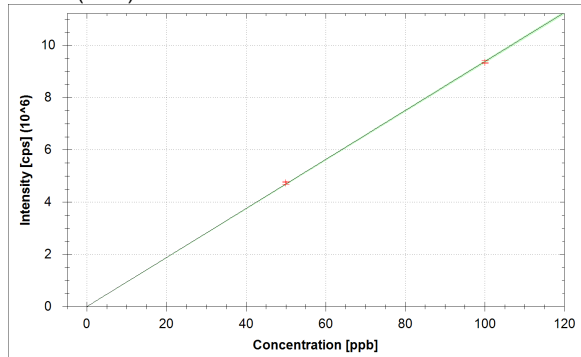

$$f(x) = 93759.6005 \cdot x + 492.0321$$

$$R^2 = 0.9999$$

$$\text{BEC} = 0.005 \text{ ppb}$$

$$\text{LoD} = 0.0008 \text{ ppb}$$

141Pr (KED)

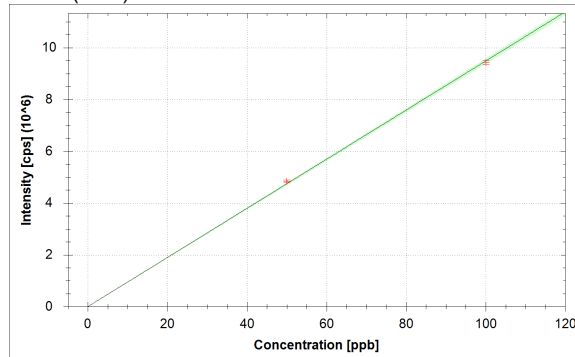

$$f(x) = 94880.7402 \cdot x + 63.2267$$

$$R^2 = 0.9998$$

$$\text{BEC} = 0.001 \text{ ppb}$$

$$\text{LoD} = 0.0002 \text{ ppb}$$

142Nd (KED)

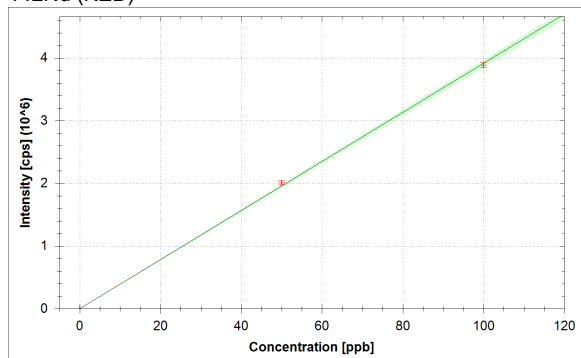

$$f(x) = 39143.9900 \cdot x + 115.6616$$

$$R^2 = 0.9996$$

$$\text{BEC} = 0.003 \text{ ppb}$$

$$\text{LoD} = 0.0004 \text{ ppb}$$

152Sm (KED)

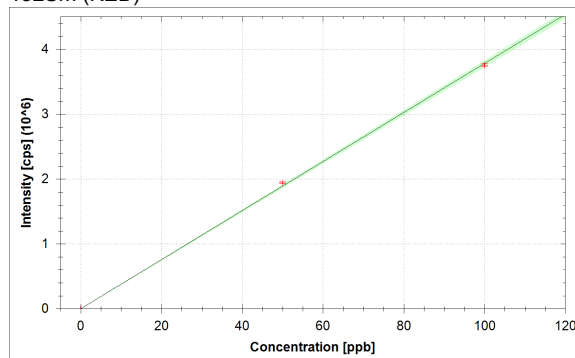

$$f(x) = 37820.7648 \cdot x + 15.2923$$

$$R^2 = 0.9997$$

$$\text{BEC} = 0.000 \text{ ppb}$$

$$\text{LoD} = 0.0003 \text{ ppb}$$

153Eu (KED)

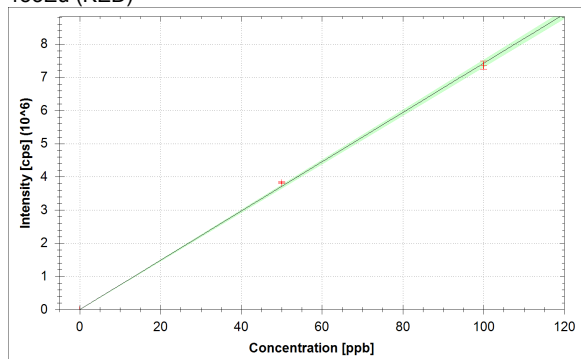

$$f(x) = 74203.3706 \cdot x + 9.8084$$

$$R^2 = 0.9996$$

$$\text{BEC} = 0.000 \text{ ppb}$$

$$\text{LoD} = 0.0001 \text{ ppb}$$

158Gd (KED)

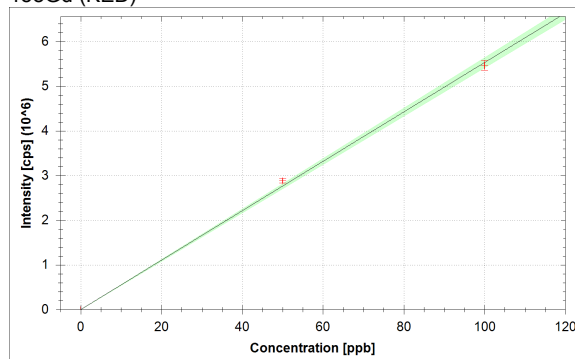

$$f(x) = 55297.2805 \cdot x + 28.3862$$

$$R^2 = 0.9991$$

$$\text{BEC} = 0.001 \text{ ppb}$$

$$\text{LoD} = 0.0005 \text{ ppb}$$

164Dy (KED)

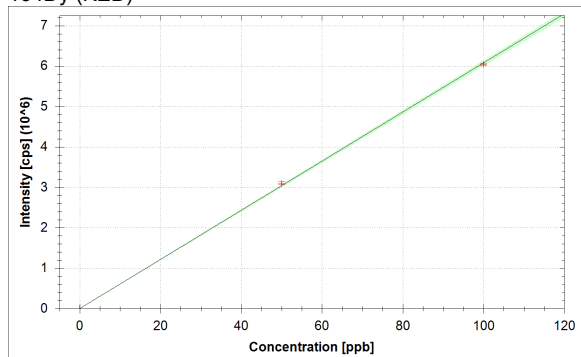

$$f(x) = 60784.0563 \cdot x + 27.2708$$

$$R^2 = 0.9998$$

$$\text{BEC} = 0.000 \text{ ppb}$$

$$\text{LoD} = 0.0006 \text{ ppb}$$

166Er (KED)

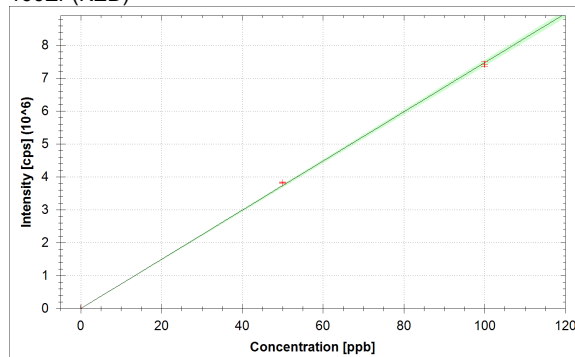

$$f(x) = 74703.8764 \cdot x + 436.2499$$

$$R^2 = 0.9997$$

$$\text{BEC} = 0.006 \text{ ppb}$$

$$\text{LoD} = 0.0004 \text{ ppb}$$

169Tm (KED)

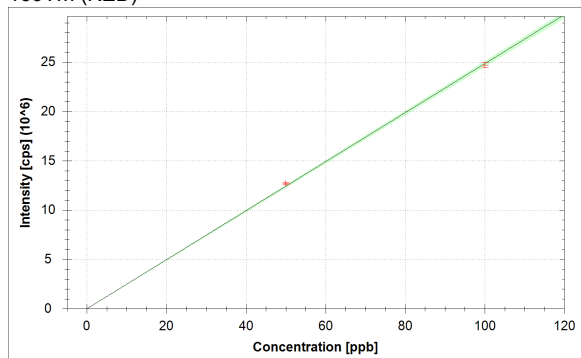

$$f(x) = 248468.6391 \cdot x + 29.4276$$

$$R^2 = 0.9998$$

$$\text{BEC} = 0.000 \text{ ppb}$$

$$\text{LoD} = 0.0002 \text{ ppb}$$

174Yb (KED)

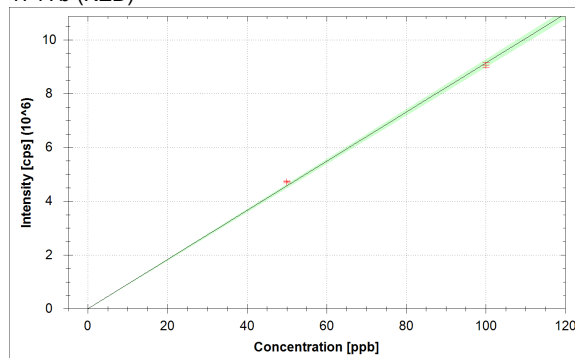

$$f(x) = 91393.6195 \cdot x + 30.4852$$

$$R^2 = 0.9995$$

$$\text{BEC} = 0.000 \text{ ppb}$$

$$\text{LoD} = 0.0003 \text{ ppb}$$

175Lu (KED)

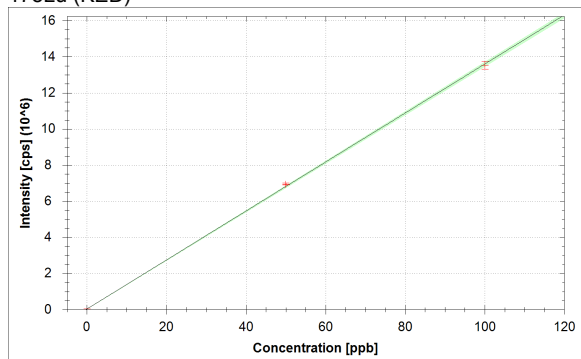

$$f(x) = 135644.7858 \cdot x + 31494.8436$$

$$R^2 = 0.9998$$

$$\text{BEC} = 0.232 \text{ ppb}$$

$$\text{LoD} = 0.0255 \text{ ppb}$$

205Tl (KED)

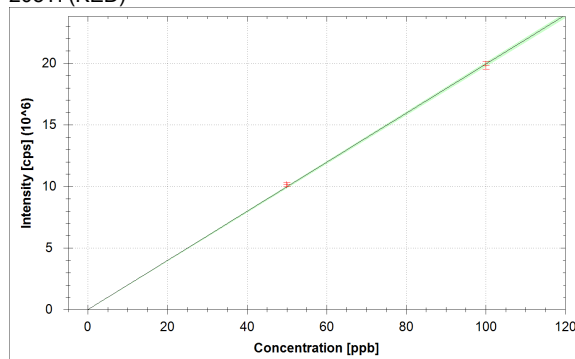

$$f(x) = 199220.8993 \cdot x + 49.0346$$

$$R^2 = 0.9999$$

$$\text{BEC} = 0.000 \text{ ppb}$$

$$\text{LoD} = 0.0001 \text{ ppb}$$

208Pb (KED)

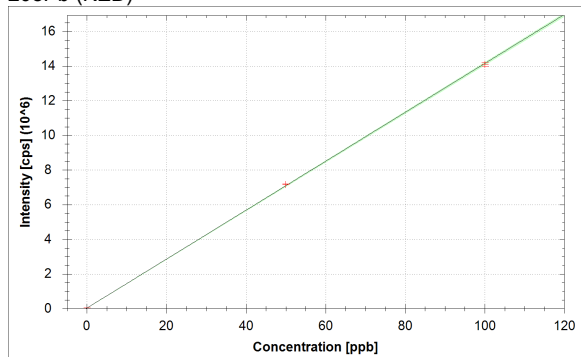

$$f(x) = 141189.3971 \cdot x + 30220.9932$$

$$R^2 = 0.9999$$

$$\text{BEC} = 0.214 \text{ ppb}$$

$$\text{LoD} = 0.0113 \text{ ppb}$$

232Th (KED)

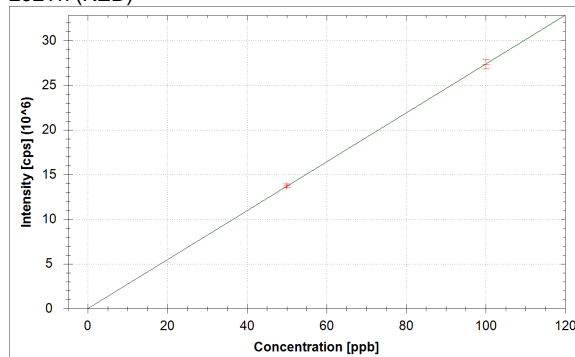

$$f(x) = 273767.0210 \cdot x + 430.4136$$

$$R^2 = 1.0000$$

$$\text{BEC} = 0.002 \text{ ppb}$$

$$\text{LoD} = 0.0003 \text{ ppb}$$

238U (KED)

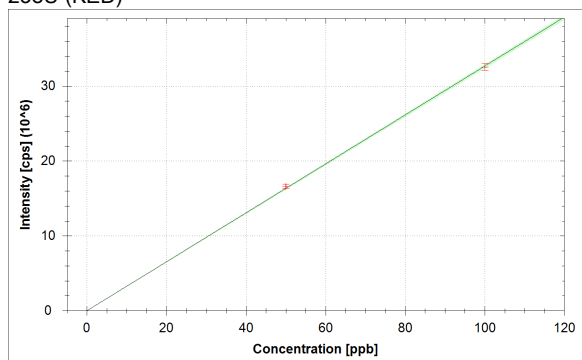

$$f(x) = 326729.9484 \cdot x + 149.7633$$

$$R^2 = 0.9999$$

$$\text{BEC} = 0.000 \text{ ppb}$$

$$\text{LoD} = 0.0003 \text{ ppb}$$

**Standards:**

Analysis Index: 3  
 Analysis Name: 0+20  
 Analysis Type: STD  
 Analysis Started at: 9/8/2021 3:42:06 PM  
 Standard (Stock): std0  
 Standard DF: 1

| Category    | Concentration average | Concentration RSD | Standard Concentration |
|-------------|-----------------------|-------------------|------------------------|
| 6Li (KED)   | 96.138 %              |                   |                        |
| 9Be (KED)   | 0.000 ppb             |                   | 0.000 ppb              |
| 11B (KED)   | 0.000 ppb             | 0.1 %             | 0.000 ppb              |
| 24Mg (KED)  | 0.000 ppb             | 0.1 %             | 0.000 ppb              |
| 27Al (KED)  | 0.000 ppb             | 0.1 %             | 0.000 ppb              |
| 45Sc (KED)  | 102.327 %             |                   |                        |
| 51V (KED)   | 0.000 ppb             | 0.4 %             | 0.000 ppb              |
| 52Cr (KED)  | 0.000 ppb             | 0.0 %             | 0.000 ppb              |
| 55Mn (KED)  | 0.000 ppb             | 0.2 %             | 0.000 ppb              |
| 56Fe (KED)  | 0.000 ppb             | 0.0 %             | 0.000 ppb              |
| 58Ni (KED)  | 0.000 ppb             | 0.0 %             | 0.000 ppb              |
| 59Co (KED)  | 0.000 ppb             | 0.1 %             | 0.000 ppb              |
| 63Cu (KED)  | 0.000 ppb             | 0.1 %             | 0.000 ppb              |
| 64Zn (KED)  | 0.000 ppb             | 0.0 %             | 0.000 ppb              |
| 69Ga (KED)  | 0.000 ppb             | 0.1 %             | 0.000 ppb              |
| 75As (KED)  | 0.000 ppb             | 0.4 %             | 0.000 ppb              |
| 80Se (KED)  | 0.000 ppb             | 0.1 %             | 0.000 ppb              |
| 85Rb (KED)  | 0.000 ppb             | 0.3 %             | 0.000 ppb              |
| 88Sr (KED)  | 0.000 ppb             | 0.1 %             | 0.000 ppb              |
| 89Y (KED)   | 100.659 %             |                   |                        |
| 107Ag (KED) | 0.000 ppb             | 0.2 %             | 0.000 ppb              |
| 114Cd (KED) | 0.000 ppb             | 0.2 %             | 0.000 ppb              |
| 115In (KED) | 100.483 %             |                   |                        |
| 133Cs (KED) | 0.000 ppb             | 0.2 %             | 0.000 ppb              |
| 138Ba (KED) | 0.000 ppb             | 0.0 %             | 0.000 ppb              |
| 139La (KED) | 0.000 ppb             | 0.3 %             | 0.000 ppb              |
| 140Ce (KED) | 0.000 ppb             | 0.1 %             | 0.000 ppb              |
| 141Pr (KED) | 0.000 ppb             | 0.2 %             | 0.000 ppb              |
| 142Nd (KED) | 0.000 ppb             | 0.1 %             | 0.000 ppb              |
| 152Sm (KED) | 0.000 ppb             | 0.3 %             | 0.000 ppb              |
| 153Eu (KED) | 0.000 ppb             | 0.6 %             | 0.000 ppb              |
| 158Gd (KED) | 0.000 ppb             | 0.4 %             | 0.000 ppb              |
| 159Tb (KED) | 101.872 %             |                   |                        |
| 164Dy (KED) | 0.000 ppb             | 0.1 %             | 0.000 ppb              |
| 166Er (KED) | 0.000 ppb             | 0.0 %             | 0.000 ppb              |
| 169Tm (KED) | 0.000 ppb             | 0.2 %             | 0.000 ppb              |
| 174Yb (KED) | 0.000 ppb             | 0.4 %             | 0.000 ppb              |
| 175Lu (KED) | 0.000 ppb             | 0.0 %             | 0.000 ppb              |
| 205Tl (KED) | 0.000 ppb             | 0.4 %             | 0.000 ppb              |
| 208Pb (KED) | 0.000 ppb             | 0.0 %             | 0.000 ppb              |
| 209Bi (KED) | 101.734 %             |                   |                        |
| 232Th (KED) | 0.000 ppb             | 0.1 %             | 0.000 ppb              |
| 238U (KED)  | 0.000 ppb             | 0.2 %             | 0.000 ppb              |

## Standards:

Analysis Index: 4  
 Analysis Name: 50+20  
 Analysis Type: STD  
 Analysis Started at: 9/8/2021 3:45:19 PM  
 Standard (Stock): std1  
 Standard DF: 1

| Category    | Concentration average | Concentration RSD | Standard Concentration |
|-------------|-----------------------|-------------------|------------------------|
| 6Li (KED)   | 98.507 %              |                   |                        |
| 9Be (KED)   | 50.651 ppb            | 2.8 %             | 50.000 ppb             |
| 11B (KED)   | 51.292 ppb            | 3.2 %             | 50.000 ppb             |
| 24Mg (KED)  | 49.866 ppb            | 2.1 %             | 50.000 ppb             |
| 27Al (KED)  | 51.414 ppb            | 1.4 %             | 50.000 ppb             |
| 45Sc (KED)  | 105.421 %             |                   |                        |
| 51V (KED)   | 49.851 ppb            | 1.9 %             | 50.000 ppb             |
| 52Cr (KED)  | 50.877 ppb            | 1.6 %             | 50.000 ppb             |
| 55Mn (KED)  | 50.556 ppb            | 1.3 %             | 50.000 ppb             |
| 56Fe (KED)  | 50.442 ppb            | 3.4 %             | 50.000 ppb             |
| 58Ni (KED)  | 50.742 ppb            | 1.2 %             | 50.000 ppb             |
| 59Co (KED)  | 50.497 ppb            | 1.7 %             | 50.000 ppb             |
| 63Cu (KED)  | 51.065 ppb            | 1.6 %             | 50.000 ppb             |
| 64Zn (KED)  | 50.045 ppb            | 0.8 %             | 50.000 ppb             |
| 69Ga (KED)  | 50.498 ppb            | 1.4 %             | 50.000 ppb             |
| 75As (KED)  | 50.841 ppb            | 1.2 %             | 50.000 ppb             |
| 80Se (KED)  | 50.795 ppb            | 3.8 %             | 50.000 ppb             |
| 85Rb (KED)  | 50.643 ppb            | 1.2 %             | 50.000 ppb             |
| 88Sr (KED)  | 51.069 ppb            | 1.2 %             | 50.000 ppb             |
| 89Y (KED)   | 104.314 %             |                   |                        |
| 107Ag (KED) | 50.890 ppb            | 0.6 %             | 50.000 ppb             |
| 114Cd (KED) | 50.378 ppb            | 0.2 %             | 50.000 ppb             |
| 115In (KED) | 103.402 %             |                   |                        |
| 133Cs (KED) | 50.842 ppb            | 1.9 %             | 50.000 ppb             |
| 138Ba (KED) | 51.270 ppb            | 1.4 %             | 50.000 ppb             |
| 139La (KED) | 52.088 ppb            | 1.0 %             | 50.000 ppb             |
| 140Ce (KED) | 50.543 ppb            | 1.1 %             | 50.000 ppb             |
| 141Pr (KED) | 51.040 ppb            | 0.8 %             | 50.000 ppb             |
| 142Nd (KED) | 51.430 ppb            | 1.4 %             | 50.000 ppb             |
| 152Sm (KED) | 51.339 ppb            | 0.9 %             | 50.000 ppb             |
| 153Eu (KED) | 51.561 ppb            | 0.8 %             | 50.000 ppb             |
| 158Gd (KED) | 52.193 ppb            | 1.9 %             | 50.000 ppb             |
| 159Tb (KED) | 103.203 %             |                   |                        |
| 164Dy (KED) | 51.104 ppb            | 1.0 %             | 50.000 ppb             |
| 166Er (KED) | 51.214 ppb            | 0.4 %             | 50.000 ppb             |
| 169Tm (KED) | 51.145 ppb            | 0.9 %             | 50.000 ppb             |
| 174Yb (KED) | 51.633 ppb            | 0.8 %             | 50.000 ppb             |
| 175Lu (KED) | 50.975 ppb            | 0.8 %             | 50.000 ppb             |
| 205Tl (KED) | 50.883 ppb            | 1.6 %             | 50.000 ppb             |
| 208Pb (KED) | 50.635 ppb            | 0.1 %             | 50.000 ppb             |
| 209Bi (KED) | 101.986 %             |                   |                        |
| 232Th (KED) | 50.185 ppb            | 1.6 %             | 50.000 ppb             |
| 238U (KED)  | 50.830 ppb            | 1.6 %             | 50.000 ppb             |

**Standards:**

Analysis Index: 5  
 Analysis Name: 100+20  
 Analysis Type: STD  
 Analysis Started at: 9/8/2021 3:48:36 PM  
 Standard (Stock): std2  
 Standard DF: 1

| Category    | Concentration average | Concentration RSD | Standard Concentration |
|-------------|-----------------------|-------------------|------------------------|
| 6Li (KED)   | 96.292 %              |                   |                        |
| 9Be (KED)   | 99.674 ppb            | 4.3 %             | 100.000 ppb            |
| 11B (KED)   | 99.354 ppb            | 1.9 %             | 100.000 ppb            |
| 24Mg (KED)  | 100.067 ppb           | 4.4 %             | 100.000 ppb            |
| 27Al (KED)  | 99.293 ppb            | 4.9 %             | 100.000 ppb            |
| 45Sc (KED)  | 101.865 %             |                   |                        |
| 51V (KED)   | 100.075 ppb           | 1.8 %             | 100.000 ppb            |
| 52Cr (KED)  | 99.561 ppb            | 1.0 %             | 100.000 ppb            |
| 55Mn (KED)  | 99.722 ppb            | 1.1 %             | 100.000 ppb            |
| 56Fe (KED)  | 99.779 ppb            | 2.6 %             | 100.000 ppb            |
| 58Ni (KED)  | 99.629 ppb            | 3.0 %             | 100.000 ppb            |
| 59Co (KED)  | 99.752 ppb            | 2.1 %             | 100.000 ppb            |
| 63Cu (KED)  | 99.467 ppb            | 0.7 %             | 100.000 ppb            |
| 64Zn (KED)  | 99.977 ppb            | 0.2 %             | 100.000 ppb            |
| 69Ga (KED)  | 99.751 ppb            | 0.7 %             | 100.000 ppb            |
| 75As (KED)  | 99.579 ppb            | 0.5 %             | 100.000 ppb            |
| 80Se (KED)  | 99.602 ppb            | 2.7 %             | 100.000 ppb            |
| 85Rb (KED)  | 99.679 ppb            | 1.4 %             | 100.000 ppb            |
| 88Sr (KED)  | 99.465 ppb            | 0.9 %             | 100.000 ppb            |
| 89Y (KED)   | 101.641 %             |                   |                        |
| 107Ag (KED) | 99.555 ppb            | 1.3 %             | 100.000 ppb            |
| 114Cd (KED) | 99.811 ppb            | 2.1 %             | 100.000 ppb            |
| 115In (KED) | 99.919 %              |                   |                        |
| 133Cs (KED) | 99.579 ppb            | 0.8 %             | 100.000 ppb            |
| 138Ba (KED) | 99.365 ppb            | 1.9 %             | 100.000 ppb            |
| 139La (KED) | 98.956 ppb            | 0.3 %             | 100.000 ppb            |
| 140Ce (KED) | 99.729 ppb            | 0.6 %             | 100.000 ppb            |
| 141Pr (KED) | 99.480 ppb            | 0.8 %             | 100.000 ppb            |
| 142Nd (KED) | 99.285 ppb            | 1.1 %             | 100.000 ppb            |
| 152Sm (KED) | 99.330 ppb            | 0.6 %             | 100.000 ppb            |
| 153Eu (KED) | 99.220 ppb            | 1.6 %             | 100.000 ppb            |
| 158Gd (KED) | 98.904 ppb            | 2.0 %             | 100.000 ppb            |
| 159Tb (KED) | 101.125 %             |                   |                        |
| 164Dy (KED) | 99.448 ppb            | 0.4 %             | 100.000 ppb            |
| 166Er (KED) | 99.393 ppb            | 1.1 %             | 100.000 ppb            |
| 169Tm (KED) | 99.427 ppb            | 1.0 %             | 100.000 ppb            |
| 174Yb (KED) | 99.183 ppb            | 1.1 %             | 100.000 ppb            |
| 175Lu (KED) | 99.512 ppb            | 1.6 %             | 100.000 ppb            |
| 205Tl (KED) | 99.559 ppb            | 1.6 %             | 100.000 ppb            |
| 208Pb (KED) | 99.682 ppb            | 0.8 %             | 100.000 ppb            |
| 209Bi (KED) | 99.135 %              |                   |                        |
| 232Th (KED) | 99.908 ppb            | 2.0 %             | 100.000 ppb            |
| 238U (KED)  | 99.585 ppb            | 1.4 %             | 100.000 ppb            |

## Sample List Summary:

Instrument ID: iCAP Q

| Index: | Label:           | Main<br>Runs: | Survey<br>Runs: | Start Time:         | User name:                    |
|--------|------------------|---------------|-----------------|---------------------|-------------------------------|
| 1      | water            | 3             | 0               | 9/8/2021 3:35:45 PM | WINDOWS-UPCI4ER\Administrator |
| 2      | blk              | 3             | 0               | 9/8/2021 3:38:50 PM | WINDOWS-UPCI4ER\Administrator |
| 3      | 0+20             | 3             | 0               | 9/8/2021 3:42:06 PM | WINDOWS-UPCI4ER\Administrator |
| 4      | 50+20            | 3             | 0               | 9/8/2021 3:45:19 PM | WINDOWS-UPCI4ER\Administrator |
| 5      | 100+20           | 3             | 0               | 9/8/2021 3:48:36 PM | WINDOWS-UPCI4ER\Administrator |
| 6      | 0191119ti        | 3             | 0               | 9/8/2021 3:53:00 PM | WINDOWS-UPCI4ER\Administrator |
| 7      | 003jian          | 3             | 0               | 9/8/2021 3:56:26 PM | WINDOWS-UPCI4ER\Administrator |
| 8      | 152923011915jian | 3             | 0               | 9/8/2021 3:59:56 PM | WINDOWS-UPCI4ER\Administrator |
| 9      | 001jian          | 3             | 0               | 9/8/2021 4:03:20 PM | WINDOWS-UPCI4ER\Administrator |
| 10     | 152923028597jian | 3             | 0               | 9/8/2021 4:06:46 PM | WINDOWS-UPCI4ER\Administrator |
| 11     | 002jian          | 3             | 0               | 9/8/2021 4:10:12 PM | WINDOWS-UPCI4ER\Administrator |
| 12     | 152923015111jian | 3             | 0               | 9/8/2021 4:13:34 PM | WINDOWS-UPCI4ER\Administrator |
| 13     | 152923020253jian | 3             | 0               | 9/8/2021 4:17:06 PM | WINDOWS-UPCI4ER\Administrator |
| 14     | 029749jan        | 3             | 0               | 9/8/2021 4:20:30 PM | WINDOWS-UPCI4ER\Administrator |
| 15     | 20086jian        | 3             | 0               | 9/8/2021 4:24:10 PM | WINDOWS-UPCI4ER\Administrator |
| 16     | 018865jian       | 3             | 0               | 9/8/2021 4:27:50 PM | WINDOWS-UPCI4ER\Administrator |
| 17     | 28726jian        | 3             | 0               | 9/8/2021 4:31:28 PM | WINDOWS-UPCI4ER\Administrator |
| 18     | 28725jian        | 3             | 0               | 9/8/2021 4:34:53 PM | WINDOWS-UPCI4ER\Administrator |
| 19     | 28725fu          | 3             | 0               | 9/8/2021 4:38:15 PM | WINDOWS-UPCI4ER\Administrator |
| 20     | 28721jian        | 3             | 0               | 9/8/2021 4:41:43 PM | WINDOWS-UPCI4ER\Administrator |
| 21     | 28726fu          | 3             | 0               | 9/8/2021 4:45:12 PM | WINDOWS-UPCI4ER\Administrator |
| 22     | 28721fu          | 3             | 0               | 9/8/2021 4:48:34 PM | WINDOWS-UPCI4ER\Administrator |
| 23     | 1168jian         | 3             | 0               | 9/8/2021 4:51:58 PM | WINDOWS-UPCI4ER\Administrator |
| 24     | 2fu              | 3             | 0               | 9/8/2021 4:55:26 PM | WINDOWS-UPCI4ER\Administrator |
| 25     | 9424jian         | 3             | 0               | 9/8/2021 4:58:53 PM | WINDOWS-UPCI4ER\Administrator |

## Sample Summary

Instrument ID: iCAP Q

Analysis index: 1

Analysis name: water

Analysis started at: 9/8/2021 3:35:45 PM

User name: WINDOWS-UPCI4ER\Administrator

| Category    | Concentration average | Concentration RSD |
|-------------|-----------------------|-------------------|
| 6Li (KED)   | 0.051 %               | 173.2 %           |
| 11B (KED)   | Infinity ppb          |                   |
| 24Mg (KED)  | Infinity ppb          |                   |
| 27Al (KED)  | 20.342 ppb            | 182.6 %           |
| 45Sc (KED)  | 0.096 %               | 43.3 %            |
| 51V (KED)   | -0.002 ppb            | 0.0 %             |
| 52Cr (KED)  | 10.460 ppb            | 43.7 %            |
| 55Mn (KED)  | 35.168 ppb            | 51.3 %            |
| 56Fe (KED)  | 74.472 ppb            | 42.8 %            |
| 58Ni (KED)  | 286.886 ppb           | 32.5 %            |
| 59Co (KED)  | 0.841 ppb             | 75.6 %            |
| 63Cu (KED)  | Infinity ppb          |                   |
| 64Zn (KED)  | Infinity ppb          |                   |
| 69Ga (KED)  | Infinity ppb          |                   |
| 75As (KED)  | Infinity ppb          |                   |
| 80Se (KED)  | Infinity ppb          |                   |
| 85Rb (KED)  | Infinity ppb          |                   |
| 88Sr (KED)  | Infinity ppb          |                   |
| 89Y (KED)   | 0.000 %               | 173.2 %           |
| 107Ag (KED) | Infinity ppb          |                   |
| 114Cd (KED) | Infinity ppb          |                   |
| 115In (KED) | 0.000 %               |                   |
| 138Ba (KED) | Infinity ppb          |                   |
| 140Ce (KED) | Infinity ppb          |                   |
| 159Tb (KED) | 0.000 %               | 86.6 %            |
| 205Tl (KED) | 14.690 ppb            | 99.9 %            |
| 208Pb (KED) | 118.927 ppb           | 76.4 %            |
| 209Bi (KED) | 0.002 %               | 130.0 %           |
| 232Th (KED) | 0.068 ppb             | 177.2 %           |
| 238U (KED)  | 16.436 ppb            | 116.5 %           |

| Category   | Concentration average | Intensity average | Intensity RSD |
|------------|-----------------------|-------------------|---------------|
| 6Li (KED)  | 0.051 %               | 1 cps             | 173.2 %       |
| 9Be (KED)  |                       | 0 cps             |               |
| 11B (KED)  | Infinity ppb          | 32 cps            | 60.6 %        |
| 24Mg (KED) | Infinity ppb          | 123 cps           | 23.4 %        |
| 27Al (KED) | 20.342 ppb            | 1 cps             | 173.2 %       |
| 45Sc (KED) | 0.096 %               | 27 cps            | 43.3 %        |
| 51V (KED)  | -0.002 ppb            | 0 cps             |               |
| 52Cr (KED) | 10.460 ppb            | 74 cps            | 12.9 %        |
| 55Mn (KED) | 35.168 ppb            | 112 cps           | 26.6 %        |
| 56Fe (KED) | 74.472 ppb            | 483 cps           | 12.1 %        |
| 58Ni (KED) | 286.886 ppb           | 2,646 cps         | 5.7 %         |
| 59Co (KED) | 0.841 ppb             | 11 cps            | 62.5 %        |
| 63Cu (KED) | Infinity ppb          | 337 cps           | 4.3 %         |
| 64Zn (KED) | Infinity ppb          | 1,337 cps         | 7.1 %         |
| 69Ga (KED) | Infinity ppb          | 9 cps             | 78.1 %        |
| 75As (KED) | Infinity ppb          | 19 cps            | 20.4 %        |
| 80Se (KED) | Infinity ppb          | 527 cps           | 6.7 %         |
| 85Rb (KED) | Infinity ppb          | 12 cps            | 41.7 %        |

| Category    | Concentration average | Intensity average | Intensity RSD |
|-------------|-----------------------|-------------------|---------------|
| 88Sr (KED)  | Infinity ppb          | 34 cps            | 29.6 %        |
| 89Y (KED)   | 0.000 %               | 1 cps             | 173.2 %       |
| 107Ag (KED) | Infinity ppb          | 4 cps             | 43.3 %        |
| 114Cd (KED) | Infinity ppb          | 36 cps            | 39.0 %        |
| 115In (KED) | 0.000 %               | 0 cps             |               |
| 133Cs (KED) |                       | 2 cps             | 173.2 %       |
| 138Ba (KED) | Infinity ppb          | 349 cps           | 6.5 %         |
| 139La (KED) |                       | 2 cps             | 173.2 %       |
| 140Ce (KED) | Infinity ppb          | 11 cps            | 45.8 %        |
| 141Pr (KED) |                       | 0 cps             |               |
| 142Nd (KED) |                       | 1 cps             | 173.2 %       |
| 152Sm (KED) |                       | 0 cps             |               |
| 153Eu (KED) |                       | 2 cps             | 86.6 %        |
| 158Gd (KED) |                       | 1 cps             | 173.2 %       |
| 159Tb (KED) | 0.000 %               | 2 cps             | 86.6 %        |
| 164Dy (KED) |                       | 1 cps             | 173.2 %       |
| 166Er (KED) |                       | 2 cps             | 86.6 %        |
| 169Tm (KED) |                       | 0 cps             |               |
| 174Yb (KED) |                       | 1 cps             | 173.2 %       |
| 175Lu (KED) |                       | 0 cps             |               |
| 205Tl (KED) | 14.690 ppb            | 20 cps            | 44.1 %        |
| 208Pb (KED) | 118.927 ppb           | 137 cps           | 24.0 %        |
| 209Bi (KED) | 0.002 %               | 93 cps            | 130.0 %       |
| 232Th (KED) | 0.068 ppb             | 1 cps             | 173.2 %       |
| 238U (KED)  | 16.436 ppb            | 250 cps           | 166.3 %       |

## Sample Summary

Instrument ID: iCAP Q

Analysis index: 2

Analysis name: blk

Analysis started at: 9/8/2021 3:38:50 PM

User name: WINDOWS-UPCI4ER\Administrator

| Category    | Concentration average | Concentration RSD |
|-------------|-----------------------|-------------------|
| 6Li (KED)   | 100.000 %             |                   |
| 9Be (KED)   | 0.000 ppb             |                   |
| 11B (KED)   | -1.309 ppb            | 42.4 %            |
| 24Mg (KED)  | -0.128 ppb            | 80.2 %            |
| 27Al (KED)  | -0.055 ppb            | 450.0 %           |
| 45Sc (KED)  | 100.000 %             |                   |
| 51V (KED)   | 0.000 ppb             | 168.9 %           |
| 52Cr (KED)  | 0.001 ppb             | 86.2 %            |
| 55Mn (KED)  | 0.001 ppb             | 542.3 %           |
| 56Fe (KED)  | 0.033 ppb             | 112.7 %           |
| 58Ni (KED)  | 0.024 ppb             | 66.2 %            |
| 59Co (KED)  | 0.000 ppb             | 295.6 %           |
| 63Cu (KED)  | 0.022 ppb             | 64.2 %            |
| 64Zn (KED)  | -0.015 ppb            | 111.9 %           |
| 69Ga (KED)  | -0.004 ppb            | 154.4 %           |
| 75As (KED)  | 0.010 ppb             | 56.2 %            |
| 80Se (KED)  | -0.108 ppb            | 205.0 %           |
| 85Rb (KED)  | -0.005 ppb            | 10.6 %            |
| 88Sr (KED)  | 0.000 ppb             | 1,583.6 %         |
| 89Y (KED)   | 100.000 %             |                   |
| 107Ag (KED) | 0.000 ppb             | 141.7 %           |
| 114Cd (KED) | -0.001 ppb            | 49.0 %            |
| 115In (KED) | 100.000 %             |                   |
| 133Cs (KED) | 0.000 ppb             | 9,231.5 %         |
| 138Ba (KED) | 0.000 ppb             | 702.1 %           |
| 139La (KED) | 0.000 ppb             | 509.5 %           |
| 140Ce (KED) | 0.000 ppb             | 282.8 %           |
| 141Pr (KED) | 0.000 ppb             | 35.1 %            |
| 142Nd (KED) | 0.000 ppb             | 85.4 %            |
| 152Sm (KED) | 0.000 ppb             | 130.2 %           |
| 153Eu (KED) | 0.000 ppb             | 1,796.0 %         |
| 158Gd (KED) | 0.000 ppb             | 79.5 %            |
| 159Tb (KED) | 100.000 %             |                   |
| 164Dy (KED) | 0.000 ppb             | 2,454.0 %         |
| 166Er (KED) | 0.001 ppb             | 11.5 %            |
| 169Tm (KED) | 0.000 ppb             | 450.2 %           |
| 174Yb (KED) | 0.000 ppb             | 253.7 %           |
| 175Lu (KED) | 0.023 ppb             | 36.9 %            |
| 205Tl (KED) | 0.000 ppb             | 753.3 %           |
| 208Pb (KED) | 0.000 ppb             | 45,044.7 %        |
| 209Bi (KED) | 100.000 %             |                   |
| 232Th (KED) | 0.000 ppb             | 277.4 %           |
| 238U (KED)  | 0.000 ppb             | 44.8 %            |

| Category   | Concentration average | Intensity average | Intensity RSD |
|------------|-----------------------|-------------------|---------------|
| 6Li (KED)  | 100.000 %             | 2,158 cps         | 7.7 %         |
| 9Be (KED)  | 0.000 ppb             | 0 cps             |               |
| 11B (KED)  | -1.309 ppb            | 602 cps           | 4.5 %         |
| 24Mg (KED) | -0.128 ppb            | 324 cps           | 7.8 %         |
| 27Al (KED) | -0.055 ppb            | 76 cps            | 25.1 %        |

| Category    | Concentration average | Intensity average | Intensity RSD |
|-------------|-----------------------|-------------------|---------------|
| 45Sc (KED)  | 100.000 %             | 27,713 cps        | 1.6 %         |
| 51V (KED)   | 0.000 ppb             | 7 cps             | 50.0 %        |
| 52Cr (KED)  | 0.001 ppb             | 131 cps           | 7.3 %         |
| 55Mn (KED)  | 0.001 ppb             | 120 cps           | 21.7 %        |
| 56Fe (KED)  | 0.033 ppb             | 4,505 cps         | 5.6 %         |
| 58Ni (KED)  | 0.024 ppb             | 1,811 cps         | 8.9 %         |
| 59Co (KED)  | 0.000 ppb             | 188 cps           | 8.9 %         |
| 63Cu (KED)  | 0.022 ppb             | 1,798 cps         | 9.6 %         |
| 64Zn (KED)  | -0.015 ppb            | 1,860 cps         | 3.6 %         |
| 69Ga (KED)  | -0.004 ppb            | 64 cps            | 32.8 %        |
| 75As (KED)  | 0.010 ppb             | 18 cps            | 28.6 %        |
| 80Se (KED)  | -0.108 ppb            | 493 cps           | 12.5 %        |
| 85Rb (KED)  | -0.005 ppb            | 44 cps            | 4.3 %         |
| 88Sr (KED)  | 0.000 ppb             | 156 cps           | 22.0 %        |
| 89Y (KED)   | 100.000 %             | 291,201 cps       | 0.9 %         |
| 107Ag (KED) | 0.000 ppb             | 36 cps            | 14.3 %        |
| 114Cd (KED) | -0.001 ppb            | 144 cps           | 2.7 %         |
| 115In (KED) | 100.000 %             | 609,462 cps       | 1.7 %         |
| 133Cs (KED) | 0.000 ppb             | 44 cps            | 33.8 %        |
| 138Ba (KED) | 0.000 ppb             | 1,889 cps         | 1.6 %         |
| 139La (KED) | 0.000 ppb             | 144 cps           | 11.4 %        |
| 140Ce (KED) | 0.000 ppb             | 501 cps           | 4.7 %         |
| 141Pr (KED) | 0.000 ppb             | 47 cps            | 12.4 %        |
| 142Nd (KED) | 0.000 ppb             | 109 cps           | 4.7 %         |
| 152Sm (KED) | 0.000 ppb             | 12 cps            | 31.5 %        |
| 153Eu (KED) | 0.000 ppb             | 10 cps            | 33.3 %        |
| 158Gd (KED) | 0.000 ppb             | 18 cps            | 47.2 %        |
| 159Tb (KED) | 100.000 %             | 3,946,020 cps     | 0.9 %         |
| 164Dy (KED) | 0.000 ppb             | 28 cps            | 42.1 %        |
| 166Er (KED) | 0.001 ppb             | 518 cps           | 2.7 %         |
| 169Tm (KED) | 0.000 ppb             | 33 cps            | 52.9 %        |
| 174Yb (KED) | 0.000 ppb             | 34 cps            | 29.6 %        |
| 175Lu (KED) | 0.023 ppb             | 34,614 cps        | 3.8 %         |
| 205Tl (KED) | 0.000 ppb             | 48 cps            | 21.3 %        |
| 208Pb (KED) | 0.000 ppb             | 30,220 cps        | 1.7 %         |
| 209Bi (KED) | 100.000 %             | 4,023,356 cps     | 1.5 %         |
| 232Th (KED) | 0.000 ppb             | 441 cps           | 8.1 %         |
| 238U (KED)  | 0.000 ppb             | 211 cps           | 12.0 %        |

## Sample Summary

Instrument ID: iCAP Q

Analysis index: 3

Analysis name: 0+20

Analysis started at: 9/8/2021 3:42:06 PM

User name: WINDOWS-UPCI4ER\Administrator

| Category    | Concentration average | Concentration RSD |
|-------------|-----------------------|-------------------|
| 6Li (KED)   | 96.138 %              |                   |
| 9Be (KED)   | 0.000 ppb             |                   |
| 11B (KED)   | 0.000 ppb             | 0.1 %             |
| 24Mg (KED)  | 0.000 ppb             | 0.1 %             |
| 27Al (KED)  | 0.000 ppb             | 0.1 %             |
| 45Sc (KED)  | 102.327 %             |                   |
| 51V (KED)   | 0.000 ppb             | 0.4 %             |
| 52Cr (KED)  | 0.000 ppb             | 0.0 %             |
| 55Mn (KED)  | 0.000 ppb             | 0.2 %             |
| 56Fe (KED)  | 0.000 ppb             | 0.0 %             |
| 58Ni (KED)  | 0.000 ppb             | 0.0 %             |
| 59Co (KED)  | 0.000 ppb             | 0.1 %             |
| 63Cu (KED)  | 0.000 ppb             | 0.1 %             |
| 64Zn (KED)  | 0.000 ppb             | 0.0 %             |
| 69Ga (KED)  | 0.000 ppb             | 0.1 %             |
| 75As (KED)  | 0.000 ppb             | 0.4 %             |
| 80Se (KED)  | 0.000 ppb             | 0.1 %             |
| 85Rb (KED)  | 0.000 ppb             | 0.3 %             |
| 88Sr (KED)  | 0.000 ppb             | 0.1 %             |
| 89Y (KED)   | 100.659 %             |                   |
| 107Ag (KED) | 0.000 ppb             | 0.2 %             |
| 114Cd (KED) | 0.000 ppb             | 0.2 %             |
| 115In (KED) | 100.483 %             |                   |
| 133Cs (KED) | 0.000 ppb             | 0.2 %             |
| 138Ba (KED) | 0.000 ppb             | 0.0 %             |
| 139La (KED) | 0.000 ppb             | 0.3 %             |
| 140Ce (KED) | 0.000 ppb             | 0.1 %             |
| 141Pr (KED) | 0.000 ppb             | 0.2 %             |
| 142Nd (KED) | 0.000 ppb             | 0.1 %             |
| 152Sm (KED) | 0.000 ppb             | 0.3 %             |
| 153Eu (KED) | 0.000 ppb             | 0.6 %             |
| 158Gd (KED) | 0.000 ppb             | 0.4 %             |
| 159Tb (KED) | 101.872 %             |                   |
| 164Dy (KED) | 0.000 ppb             | 0.1 %             |
| 166Er (KED) | 0.000 ppb             | 0.0 %             |
| 169Tm (KED) | 0.000 ppb             | 0.2 %             |
| 174Yb (KED) | 0.000 ppb             | 0.4 %             |
| 175Lu (KED) | 0.000 ppb             | 0.0 %             |
| 205Tl (KED) | 0.000 ppb             | 0.4 %             |
| 208Pb (KED) | 0.000 ppb             | 0.0 %             |
| 209Bi (KED) | 101.734 %             |                   |
| 232Th (KED) | 0.000 ppb             | 0.1 %             |
| 238U (KED)  | 0.000 ppb             | 0.2 %             |

| Category   | Concentration average | Intensity average | Intensity RSD |
|------------|-----------------------|-------------------|---------------|
| 6Li (KED)  | 96.138 %              | 2,075 cps         | 4.8 %         |
| 9Be (KED)  | 0.000 ppb             | 0 cps             |               |
| 11B (KED)  | 0.000 ppb             | 641 cps           | 8.5 %         |
| 24Mg (KED) | 0.000 ppb             | 354 cps           | 5.5 %         |
| 27Al (KED) | 0.000 ppb             | 81 cps            | 12.6 %        |

| Category    | Concentration average | Intensity average | Intensity RSD |
|-------------|-----------------------|-------------------|---------------|
| 45Sc (KED)  | 102.327 %             | 28,358 cps        | 0.2 %         |
| 51V (KED)   | 0.000 ppb             | 9 cps             | 43.3 %        |
| 52Cr (KED)  | 0.000 ppb             | 124 cps           | 1.5 %         |
| 55Mn (KED)  | 0.000 ppb             | 118 cps           | 20.1 %        |
| 56Fe (KED)  | 0.000 ppb             | 4,352 cps         | 3.1 %         |
| 58Ni (KED)  | 0.000 ppb             | 1,597 cps         | 4.3 %         |
| 59Co (KED)  | 0.000 ppb             | 199 cps           | 13.7 %        |
| 63Cu (KED)  | 0.000 ppb             | 1,513 cps         | 9.7 %         |
| 64Zn (KED)  | 0.000 ppb             | 1,921 cps         | 4.4 %         |
| 69Ga (KED)  | 0.000 ppb             | 79 cps            | 8.8 %         |
| 75As (KED)  | 0.000 ppb             | 9 cps             | 43.3 %        |
| 80Se (KED)  | 0.000 ppb             | 524 cps           | 13.4 %        |
| 85Rb (KED)  | 0.000 ppb             | 61 cps            | 25.8 %        |
| 88Sr (KED)  | 0.000 ppb             | 154 cps           | 14.4 %        |
| 89Y (KED)   | 100.659 %             | 293,119 cps       | 0.3 %         |
| 107Ag (KED) | 0.000 ppb             | 39 cps            | 19.8 %        |
| 114Cd (KED) | 0.000 ppb             | 156 cps           | 19.9 %        |
| 115In (KED) | 100.483 %             | 612,408 cps       | 1.3 %         |
| 133Cs (KED) | 0.000 ppb             | 44 cps            | 18.9 %        |
| 138Ba (KED) | 0.000 ppb             | 1,918 cps         | 0.6 %         |
| 139La (KED) | 0.000 ppb             | 150 cps           | 25.2 %        |
| 140Ce (KED) | 0.000 ppb             | 501 cps           | 5.4 %         |
| 141Pr (KED) | 0.000 ppb             | 64 cps            | 24.4 %        |
| 142Nd (KED) | 0.000 ppb             | 118 cps           | 8.6 %         |
| 152Sm (KED) | 0.000 ppb             | 16 cps            | 32.7 %        |
| 153Eu (KED) | 0.000 ppb             | 10 cps            | 57.7 %        |
| 158Gd (KED) | 0.000 ppb             | 29 cps            | 35.3 %        |
| 159Tb (KED) | 101.872 %             | 4,019,902 cps     | 0.7 %         |
| 164Dy (KED) | 0.000 ppb             | 28 cps            | 6.9 %         |
| 166Er (KED) | 0.000 ppb             | 444 cps           | 4.1 %         |
| 169Tm (KED) | 0.000 ppb             | 30 cps            | 22.2 %        |
| 174Yb (KED) | 0.000 ppb             | 31 cps            | 44.6 %        |
| 175Lu (KED) | 0.000 ppb             | 32,086 cps        | 1.6 %         |
| 205Tl (KED) | 0.000 ppb             | 50 cps            | 40.6 %        |
| 208Pb (KED) | 0.000 ppb             | 30,745 cps        | 0.6 %         |
| 209Bi (KED) | 101.734 %             | 4,093,109 cps     | 0.9 %         |
| 232Th (KED) | 0.000 ppb             | 438 cps           | 7.8 %         |
| 238U (KED)  | 0.000 ppb             | 152 cps           | 18.6 %        |

## Sample Summary

Instrument ID: iCAP Q

Analysis index: 4

Analysis name: 50+20

Analysis started at: 9/8/2021 3:45:19 PM

User name: WINDOWS-UPCI4ER\Administrator

| Category    | Concentration average | Concentration RSD |
|-------------|-----------------------|-------------------|
| 6Li (KED)   | 98.507 %              |                   |
| 9Be (KED)   | 50.651 ppb            | 2.8 %             |
| 11B (KED)   | 51.292 ppb            | 3.2 %             |
| 24Mg (KED)  | 49.866 ppb            | 2.1 %             |
| 27Al (KED)  | 51.414 ppb            | 1.4 %             |
| 45Sc (KED)  | 105.421 %             |                   |
| 51V (KED)   | 49.851 ppb            | 1.9 %             |
| 52Cr (KED)  | 50.877 ppb            | 1.6 %             |
| 55Mn (KED)  | 50.556 ppb            | 1.3 %             |
| 56Fe (KED)  | 50.442 ppb            | 3.4 %             |
| 58Ni (KED)  | 50.742 ppb            | 1.2 %             |
| 59Co (KED)  | 50.497 ppb            | 1.7 %             |
| 63Cu (KED)  | 51.065 ppb            | 1.6 %             |
| 64Zn (KED)  | 50.045 ppb            | 0.8 %             |
| 69Ga (KED)  | 50.498 ppb            | 1.4 %             |
| 75As (KED)  | 50.841 ppb            | 1.2 %             |
| 80Se (KED)  | 50.795 ppb            | 3.8 %             |
| 85Rb (KED)  | 50.643 ppb            | 1.2 %             |
| 88Sr (KED)  | 51.069 ppb            | 1.2 %             |
| 89Y (KED)   | 104.314 %             |                   |
| 107Ag (KED) | 50.890 ppb            | 0.6 %             |
| 114Cd (KED) | 50.378 ppb            | 0.2 %             |
| 115In (KED) | 103.402 %             |                   |
| 133Cs (KED) | 50.842 ppb            | 1.9 %             |
| 138Ba (KED) | 51.270 ppb            | 1.4 %             |
| 139La (KED) | 52.088 ppb            | 1.0 %             |
| 140Ce (KED) | 50.543 ppb            | 1.1 %             |
| 141Pr (KED) | 51.040 ppb            | 0.8 %             |
| 142Nd (KED) | 51.430 ppb            | 1.4 %             |
| 152Sm (KED) | 51.339 ppb            | 0.9 %             |
| 153Eu (KED) | 51.561 ppb            | 0.8 %             |
| 158Gd (KED) | 52.193 ppb            | 1.9 %             |
| 159Tb (KED) | 103.203 %             |                   |
| 164Dy (KED) | 51.104 ppb            | 1.0 %             |
| 166Er (KED) | 51.214 ppb            | 0.4 %             |
| 169Tm (KED) | 51.145 ppb            | 0.9 %             |
| 174Yb (KED) | 51.633 ppb            | 0.8 %             |
| 175Lu (KED) | 50.975 ppb            | 0.8 %             |
| 205Tl (KED) | 50.883 ppb            | 1.6 %             |
| 208Pb (KED) | 50.635 ppb            | 0.1 %             |
| 209Bi (KED) | 101.986 %             |                   |
| 232Th (KED) | 50.185 ppb            | 1.6 %             |
| 238U (KED)  | 50.830 ppb            | 1.6 %             |

| Category   | Concentration average | Intensity average | Intensity RSD |
|------------|-----------------------|-------------------|---------------|
| 6Li (KED)  | 98.507 %              | 2,126 cps         | 0.9 %         |
| 9Be (KED)  | 50.651 ppb            | 5,279 cps         | 2.5 %         |
| 11B (KED)  | 51.292 ppb            | 3,132 cps         | 2.9 %         |
| 24Mg (KED) | 49.866 ppb            | 16,914 cps        | 1.6 %         |
| 27Al (KED) | 51.414 ppb            | 3,974 cps         | 1.3 %         |

| Category    | Concentration average | Intensity average | Intensity RSD |
|-------------|-----------------------|-------------------|---------------|
| 45Sc (KED)  | 105.421 %             | 29,215 cps        | 2.0 %         |
| 51V (KED)   | 49.851 ppb            | 278,837 cps       | 1.4 %         |
| 52Cr (KED)  | 50.877 ppb            | 453,369 cps       | 0.9 %         |
| 55Mn (KED)  | 50.556 ppb            | 201,740 cps       | 0.9 %         |
| 56Fe (KED)  | 50.442 ppb            | 409,158 cps       | 2.0 %         |
| 58Ni (KED)  | 50.742 ppb            | 566,282 cps       | 0.8 %         |
| 59Co (KED)  | 50.497 ppb            | 913,654 cps       | 0.4 %         |
| 63Cu (KED)  | 51.065 ppb            | 718,507 cps       | 0.8 %         |
| 64Zn (KED)  | 50.045 ppb            | 173,721 cps       | 0.6 %         |
| 69Ga (KED)  | 50.498 ppb            | 202,831 cps       | 0.5 %         |
| 75As (KED)  | 50.841 ppb            | 49,254 cps        | 1.1 %         |
| 80Se (KED)  | 50.795 ppb            | 14,313 cps        | 2.7 %         |
| 85Rb (KED)  | 50.643 ppb            | 187,331 cps       | 0.6 %         |
| 88Sr (KED)  | 51.069 ppb            | 264,961 cps       | 0.3 %         |
| 89Y (KED)   | 104.314 %             | 303,763 cps       | 1.0 %         |
| 107Ag (KED) | 50.890 ppb            | 2,341,788 cps     | 0.6 %         |
| 114Cd (KED) | 50.378 ppb            | 811,549 cps       | 1.1 %         |
| 115In (KED) | 103.402 %             | 630,193 cps       | 1.2 %         |
| 133Cs (KED) | 50.842 ppb            | 1,102,097 cps     | 3.0 %         |
| 138Ba (KED) | 51.270 ppb            | 1,634,485 cps     | 1.6 %         |
| 139La (KED) | 52.088 ppb            | 3,607,559 cps     | 0.7 %         |
| 140Ce (KED) | 50.543 ppb            | 4,891,154 cps     | 1.3 %         |
| 141Pr (KED) | 51.040 ppb            | 4,997,970 cps     | 1.2 %         |
| 142Nd (KED) | 51.430 ppb            | 2,077,777 cps     | 1.5 %         |
| 152Sm (KED) | 51.339 ppb            | 2,003,827 cps     | 0.4 %         |
| 153Eu (KED) | 51.561 ppb            | 3,948,410 cps     | 0.3 %         |
| 158Gd (KED) | 52.193 ppb            | 2,978,454 cps     | 1.6 %         |
| 159Tb (KED) | 103.203 %             | 4,072,406 cps     | 0.5 %         |
| 164Dy (KED) | 51.104 ppb            | 3,205,736 cps     | 0.4 %         |
| 166Er (KED) | 51.214 ppb            | 3,948,920 cps     | 0.8 %         |
| 169Tm (KED) | 51.145 ppb            | 13,114,758 cps    | 0.5 %         |
| 174Yb (KED) | 51.633 ppb            | 4,870,015 cps     | 0.7 %         |
| 175Lu (KED) | 50.975 ppb            | 7,168,361 cps     | 0.7 %         |
| 205Tl (KED) | 50.883 ppb            | 10,337,982 cps    | 1.3 %         |
| 208Pb (KED) | 50.635 ppb            | 7,321,973 cps     | 0.4 %         |
| 209Bi (KED) | 101.986 %             | 4,103,279 cps     | 0.5 %         |
| 232Th (KED) | 50.185 ppb            | 14,011,499 cps    | 1.1 %         |
| 238U (KED)  | 50.830 ppb            | 16,936,817 cps    | 1.1 %         |

## Sample Summary

Instrument ID: iCAP Q

Analysis index: 5

Analysis name: 100+20

Analysis started at: 9/8/2021 3:48:36 PM

User name: WINDOWS-UPCI4ER\Administrator

| Category    | Concentration average | Concentration RSD |
|-------------|-----------------------|-------------------|
| 6Li (KED)   | 96.292 %              |                   |
| 9Be (KED)   | 99.674 ppb            | 4.3 %             |
| 11B (KED)   | 99.354 ppb            | 1.9 %             |
| 24Mg (KED)  | 100.067 ppb           | 4.4 %             |
| 27Al (KED)  | 99.293 ppb            | 4.9 %             |
| 45Sc (KED)  | 101.865 %             |                   |
| 51V (KED)   | 100.075 ppb           | 1.8 %             |
| 52Cr (KED)  | 99.561 ppb            | 1.0 %             |
| 55Mn (KED)  | 99.722 ppb            | 1.1 %             |
| 56Fe (KED)  | 99.779 ppb            | 2.6 %             |
| 58Ni (KED)  | 99.629 ppb            | 3.0 %             |
| 59Co (KED)  | 99.752 ppb            | 2.1 %             |
| 63Cu (KED)  | 99.467 ppb            | 0.7 %             |
| 64Zn (KED)  | 99.977 ppb            | 0.2 %             |
| 69Ga (KED)  | 99.751 ppb            | 0.7 %             |
| 75As (KED)  | 99.579 ppb            | 0.5 %             |
| 80Se (KED)  | 99.602 ppb            | 2.7 %             |
| 85Rb (KED)  | 99.679 ppb            | 1.4 %             |
| 88Sr (KED)  | 99.465 ppb            | 0.9 %             |
| 89Y (KED)   | 101.641 %             |                   |
| 107Ag (KED) | 99.555 ppb            | 1.3 %             |
| 114Cd (KED) | 99.811 ppb            | 2.1 %             |
| 115In (KED) | 99.919 %              |                   |
| 133Cs (KED) | 99.579 ppb            | 0.8 %             |
| 138Ba (KED) | 99.365 ppb            | 1.9 %             |
| 139La (KED) | 98.956 ppb            | 0.3 %             |
| 140Ce (KED) | 99.729 ppb            | 0.6 %             |
| 141Pr (KED) | 99.480 ppb            | 0.8 %             |
| 142Nd (KED) | 99.285 ppb            | 1.1 %             |
| 152Sm (KED) | 99.330 ppb            | 0.6 %             |
| 153Eu (KED) | 99.220 ppb            | 1.6 %             |
| 158Gd (KED) | 98.904 ppb            | 2.0 %             |
| 159Tb (KED) | 101.125 %             |                   |
| 164Dy (KED) | 99.448 ppb            | 0.4 %             |
| 166Er (KED) | 99.393 ppb            | 1.1 %             |
| 169Tm (KED) | 99.427 ppb            | 1.0 %             |
| 174Yb (KED) | 99.183 ppb            | 1.1 %             |
| 175Lu (KED) | 99.512 ppb            | 1.6 %             |
| 205Tl (KED) | 99.559 ppb            | 1.6 %             |
| 208Pb (KED) | 99.682 ppb            | 0.8 %             |
| 209Bi (KED) | 99.135 %              |                   |
| 232Th (KED) | 99.908 ppb            | 2.0 %             |
| 238U (KED)  | 99.585 ppb            | 1.4 %             |

| Category   | Concentration average | Intensity average | Intensity RSD |
|------------|-----------------------|-------------------|---------------|
| 6Li (KED)  | 96.292 %              | 2,078 cps         | 4.6 %         |
| 9Be (KED)  | 99.674 ppb            | 10,142 cps        | 0.6 %         |
| 11B (KED)  | 99.354 ppb            | 5,324 cps         | 3.3 %         |
| 24Mg (KED) | 100.067 ppb           | 32,780 cps        | 0.7 %         |
| 27Al (KED) | 99.293 ppb            | 7,338 cps         | 3.3 %         |

| Category    | Concentration average | Intensity average | Intensity RSD |
|-------------|-----------------------|-------------------|---------------|
| 45Sc (KED)  | 101.865 %             | 28,230 cps        | 1.8 %         |
| 51V (KED)   | 100.075 ppb           | 540,862 cps       | 0.7 %         |
| 52Cr (KED)  | 99.561 ppb            | 857,213 cps       | 0.8 %         |
| 55Mn (KED)  | 99.722 ppb            | 384,423 cps       | 1.1 %         |
| 56Fe (KED)  | 99.779 ppb            | 777,988 cps       | 2.3 %         |
| 58Ni (KED)  | 99.629 ppb            | 1,072,736 cps     | 2.1 %         |
| 59Co (KED)  | 99.752 ppb            | 1,743,807 cps     | 1.3 %         |
| 63Cu (KED)  | 99.467 ppb            | 1,362,409 cps     | 1.7 %         |
| 64Zn (KED)  | 99.977 ppb            | 336,235 cps       | 1.3 %         |
| 69Ga (KED)  | 99.751 ppb            | 390,346 cps       | 1.3 %         |
| 75As (KED)  | 99.579 ppb            | 93,990 cps        | 1.0 %         |
| 80Se (KED)  | 99.602 ppb            | 26,848 cps        | 3.6 %         |
| 85Rb (KED)  | 99.679 ppb            | 359,229 cps       | 1.7 %         |
| 88Sr (KED)  | 99.465 ppb            | 502,691 cps       | 0.6 %         |
| 89Y (KED)   | 101.641 %             | 295,978 cps       | 1.1 %         |
| 107Ag (KED) | 99.555 ppb            | 4,426,877 cps     | 0.9 %         |
| 114Cd (KED) | 99.811 ppb            | 1,553,445 cps     | 1.5 %         |
| 115In (KED) | 99.919 %              | 608,966 cps       | 0.6 %         |
| 133Cs (KED) | 99.579 ppb            | 2,085,581 cps     | 1.2 %         |
| 138Ba (KED) | 99.365 ppb            | 3,101,826 cps     | 1.3 %         |
| 139La (KED) | 98.956 ppb            | 6,715,441 cps     | 0.5 %         |
| 140Ce (KED) | 99.729 ppb            | 9,455,898 cps     | 0.3 %         |
| 141Pr (KED) | 99.480 ppb            | 9,544,590 cps     | 0.3 %         |
| 142Nd (KED) | 99.285 ppb            | 3,930,097 cps     | 0.8 %         |
| 152Sm (KED) | 99.330 ppb            | 3,799,030 cps     | 1.0 %         |
| 153Eu (KED) | 99.220 ppb            | 7,444,599 cps     | 0.9 %         |
| 158Gd (KED) | 98.904 ppb            | 5,530,086 cps     | 1.3 %         |
| 159Tb (KED) | 101.125 %             | 3,990,398 cps     | 0.8 %         |
| 164Dy (KED) | 99.448 ppb            | 6,112,832 cps     | 0.8 %         |
| 166Er (KED) | 99.393 ppb            | 7,508,986 cps     | 1.3 %         |
| 169Tm (KED) | 99.427 ppb            | 24,981,513 cps    | 0.7 %         |
| 174Yb (KED) | 99.183 ppb            | 9,166,836 cps     | 1.5 %         |
| 175Lu (KED) | 99.512 ppb            | 13,680,900 cps    | 0.9 %         |
| 205Tl (KED) | 99.559 ppb            | 19,660,756 cps    | 1.1 %         |
| 208Pb (KED) | 99.682 ppb            | 13,981,399 cps    | 0.5 %         |
| 209Bi (KED) | 99.135 %              | 3,988,551 cps     | 1.3 %         |
| 232Th (KED) | 99.908 ppb            | 27,111,264 cps    | 1.0 %         |
| 238U (KED)  | 99.585 ppb            | 32,252,228 cps    | 0.2 %         |

## Sample Summary

Instrument ID: iCAP Q

Analysis index: 6

Analysis name: 0191119ti

Analysis started at: 9/8/2021 3:53:00 PM

User name: WINDOWS-UPCI4ER\Administrator

| Category    | Concentration average | Concentration RSD |
|-------------|-----------------------|-------------------|
| 6Li (KED)   | 109.424 %             | 4.7 %             |
| 9Be (KED)   | 0.158 ppb             | 80.7 %            |
| 11B (KED)   | -6.557 ppb            | 22.1 %            |
| 24Mg (KED)  | 490.071 ppb           | 2.3 %             |
| 27Al (KED)  | 428.733 ppb           | 1.4 %             |
| 45Sc (KED)  | 103.882 %             | 3.7 %             |
| 51V (KED)   | 1.038 ppb             | 16.1 %            |
| 52Cr (KED)  | 3.878 ppb             | 4.3 %             |
| 55Mn (KED)  | 15.631 ppb            | 2.2 %             |
| 56Fe (KED)  | 715.298 ppb           | 1.8 %             |
| 58Ni (KED)  | 7.150 ppb             | 3.2 %             |
| 59Co (KED)  | 0.467 ppb             | 18.6 %            |
| 63Cu (KED)  | 12.515 ppb            | 0.7 %             |
| 64Zn (KED)  | 155.748 ppb           | 1.4 %             |
| 69Ga (KED)  | 1.537 ppb             | 1.1 %             |
| 75As (KED)  | 0.495 ppb             | 18.7 %            |
| 80Se (KED)  | 0.223 ppb             | 37.5 %            |
| 85Rb (KED)  | 1.948 ppb             | 1.8 %             |
| 88Sr (KED)  | 7.996 ppb             | 1.4 %             |
| 89Y (KED)   | 98.273 %              | 1.0 %             |
| 107Ag (KED) | 0.180 ppb             | 19.1 %            |
| 114Cd (KED) | 0.095 ppb             | 24.9 %            |
| 115In (KED) | 91.086 %              | 0.8 %             |
| 133Cs (KED) | 0.123 ppb             | 34.6 %            |
| 138Ba (KED) | 5.468 ppb             | 2.2 %             |
| 139La (KED) | 0.393 ppb             | 8.3 %             |
| 140Ce (KED) | 0.787 ppb             | 3.6 %             |
| 141Pr (KED) | 0.113 ppb             | 24.6 %            |
| 142Nd (KED) | 0.510 ppb             | 4.7 %             |
| 152Sm (KED) | 0.087 ppb             | 30.9 %            |
| 153Eu (KED) | 0.036 ppb             | 75.9 %            |
| 158Gd (KED) | 0.082 ppb             | 29.0 %            |
| 159Tb (KED) | 97.545 %              | 0.6 %             |
| 164Dy (KED) | 0.063 ppb             | 44.4 %            |
| 166Er (KED) | 0.043 ppb             | 72.0 %            |
| 169Tm (KED) | 0.024 ppb             | 116.8 %           |
| 174Yb (KED) | 0.036 ppb             | 70.1 %            |
| 175Lu (KED) | -0.021 ppb            | 159.4 %           |
| 205Tl (KED) | 0.034 ppb             | 83.3 %            |
| 208Pb (KED) | 1.009 ppb             | 7.4 %             |
| 209Bi (KED) | 84.864 %              | 0.8 %             |
| 232Th (KED) | 0.623 ppb             | 90.1 %            |
| 238U (KED)  | 0.371 ppb             | 132.5 %           |

| Category   | Concentration average | Intensity average | Intensity RSD |
|------------|-----------------------|-------------------|---------------|
| 6Li (KED)  | 109.424 %             | 2,361 cps         | 4.7 %         |
| 9Be (KED)  | 0.158 ppb             | 18 cps            | 75.8 %        |
| 11B (KED)  | -6.557 ppb            | 377 cps           | 15.4 %        |
| 24Mg (KED) | 490.071 ppb           | 180,977 cps       | 2.7 %         |
| 27Al (KED) | 428.733 ppb           | 32,047 cps        | 2.8 %         |

| Category    | Concentration average | Intensity average | Intensity RSD |
|-------------|-----------------------|-------------------|---------------|
| 45Sc (KED)  | 103.882 %             | 28,789 cps        | 3.7 %         |
| 51V (KED)   | 1.038 ppb             | 5,709 cps         | 12.8 %        |
| 52Cr (KED)  | 3.878 ppb             | 34,138 cps        | 1.6 %         |
| 55Mn (KED)  | 15.631 ppb            | 61,529 cps        | 2.0 %         |
| 56Fe (KED)  | 715.298 ppb           | 5,659,023 cps     | 2.1 %         |
| 58Ni (KED)  | 7.150 ppb             | 79,979 cps        | 0.9 %         |
| 59Co (KED)  | 0.467 ppb             | 8,488 cps         | 15.0 %        |
| 63Cu (KED)  | 12.515 ppb            | 167,020 cps       | 1.2 %         |
| 64Zn (KED)  | 155.748 ppb           | 505,371 cps       | 1.3 %         |
| 69Ga (KED)  | 1.537 ppb             | 5,891 cps         | 0.7 %         |
| 75As (KED)  | 0.495 ppb             | 460 cps           | 17.4 %        |
| 80Se (KED)  | 0.223 ppb             | 569 cps           | 3.0 %         |
| 85Rb (KED)  | 1.948 ppb             | 6,844 cps         | 1.1 %         |
| 88Sr (KED)  | 7.996 ppb             | 39,212 cps        | 1.2 %         |
| 89Y (KED)   | 98.273 %              | 286,172 cps       | 1.0 %         |
| 107Ag (KED) | 0.180 ppb             | 7,340 cps         | 19.5 %        |
| 114Cd (KED) | 0.095 ppb             | 1,490 cps         | 23.1 %        |
| 115In (KED) | 91.086 %              | 555,133 cps       | 0.8 %         |
| 133Cs (KED) | 0.123 ppb             | 2,386 cps         | 34.6 %        |
| 138Ba (KED) | 5.468 ppb             | 166,392 cps       | 1.7 %         |
| 139La (KED) | 0.393 ppb             | 25,875 cps        | 7.7 %         |
| 140Ce (KED) | 0.787 ppb             | 72,436 cps        | 3.1 %         |
| 141Pr (KED) | 0.113 ppb             | 10,485 cps        | 23.9 %        |
| 142Nd (KED) | 0.510 ppb             | 19,597 cps        | 4.1 %         |
| 152Sm (KED) | 0.087 ppb             | 3,214 cps         | 30.1 %        |
| 153Eu (KED) | 0.036 ppb             | 2,573 cps         | 75.0 %        |
| 158Gd (KED) | 0.082 ppb             | 4,428 cps         | 28.3 %        |
| 159Tb (KED) | 97.545 %              | 3,849,164 cps     | 0.6 %         |
| 164Dy (KED) | 0.063 ppb             | 3,756 cps         | 43.4 %        |
| 166Er (KED) | 0.043 ppb             | 3,556 cps         | 62.8 %        |
| 169Tm (KED) | 0.024 ppb             | 5,735 cps         | 115.8 %       |
| 174Yb (KED) | 0.036 ppb             | 3,235 cps         | 68.8 %        |
| 175Lu (KED) | -0.021 ppb            | 27,864 cps        | 15.6 %        |
| 205Tl (KED) | 0.034 ppb             | 5,707 cps         | 82.2 %        |
| 208Pb (KED) | 1.009 ppb             | 146,479 cps       | 5.8 %         |
| 209Bi (KED) | 84.864 %              | 3,414,386 cps     | 0.8 %         |
| 232Th (KED) | 0.623 ppb             | 144,728 cps       | 89.4 %        |
| 238U (KED)  | 0.371 ppb             | 102,569 cps       | 132.1 %       |

## Sample Summary

Instrument ID: iCAP Q

Analysis index: 7

Analysis name: 003jian

Analysis started at: 9/8/2021 3:56:26 PM

User name: WINDOWS-UPCI4ER\Administrator

| Category    | Concentration average | Concentration RSD |
|-------------|-----------------------|-------------------|
| 6Li (KED)   | 118.024 %             | 2.9 %             |
| 9Be (KED)   | 0.053 ppb             | 86.7 %            |
| 11B (KED)   | -3.710 ppb            | 5.3 %             |
| 24Mg (KED)  | 958.787 ppb           | 1.3 %             |
| 27Al (KED)  | 923.681 ppb           | 1.5 %             |
| 45Sc (KED)  | 109.818 %             | 2.6 %             |
| 51V (KED)   | 1.818 ppb             | 2.2 %             |
| 52Cr (KED)  | 4.567 ppb             | 1.3 %             |
| 55Mn (KED)  | 24.276 ppb            | 0.5 %             |
| 56Fe (KED)  | 959.318 ppb           | 0.7 %             |
| 58Ni (KED)  | 4.468 ppb             | 2.9 %             |
| 59Co (KED)  | 0.475 ppb             | 3.5 %             |
| 63Cu (KED)  | 6.242 ppb             | 3.1 %             |
| 64Zn (KED)  | 183.744 ppb           | 1.2 %             |
| 69Ga (KED)  | 2.451 ppb             | 1.7 %             |
| 75As (KED)  | 1.162 ppb             | 3.1 %             |
| 80Se (KED)  | 0.491 ppb             | 44.1 %            |
| 85Rb (KED)  | 2.115 ppb             | 2.3 %             |
| 88Sr (KED)  | 11.546 ppb            | 1.1 %             |
| 89Y (KED)   | 98.666 %              | 0.5 %             |
| 107Ag (KED) | 0.057 ppb             | 3.8 %             |
| 114Cd (KED) | 0.058 ppb             | 8.6 %             |
| 115In (KED) | 88.958 %              | 0.2 %             |
| 133Cs (KED) | 0.190 ppb             | 1.0 %             |
| 138Ba (KED) | 8.673 ppb             | 0.7 %             |
| 139La (KED) | 0.716 ppb             | 0.5 %             |
| 140Ce (KED) | 1.432 ppb             | 3.0 %             |
| 141Pr (KED) | 0.173 ppb             | 4.0 %             |
| 142Nd (KED) | 0.887 ppb             | 1.2 %             |
| 152Sm (KED) | 0.131 ppb             | 1.1 %             |
| 153Eu (KED) | 0.034 ppb             | 6.0 %             |
| 158Gd (KED) | 0.120 ppb             | 3.8 %             |
| 159Tb (KED) | 92.505 %              | 0.6 %             |
| 164Dy (KED) | 0.086 ppb             | 1.1 %             |
| 166Er (KED) | 0.049 ppb             | 4.7 %             |
| 169Tm (KED) | 0.015 ppb             | 13.6 %            |
| 174Yb (KED) | 0.040 ppb             | 10.9 %            |
| 175Lu (KED) | -0.041 ppb            | 20.0 %            |
| 205Tl (KED) | 0.031 ppb             | 7.5 %             |
| 208Pb (KED) | 1.110 ppb             | 3.7 %             |
| 209Bi (KED) | 79.771 %              | 1.2 %             |
| 232Th (KED) | 0.304 ppb             | 3.7 %             |
| 238U (KED)  | 0.124 ppb             | 4.5 %             |

| Category   | Concentration average | Intensity average | Intensity RSD |
|------------|-----------------------|-------------------|---------------|
| 6Li (KED)  | 118.024 %             | 2,547 cps         | 2.9 %         |
| 9Be (KED)  | 0.053 ppb             | 7 cps             | 86.6 %        |
| 11B (KED)  | -3.710 ppb            | 573 cps           | 2.7 %         |
| 24Mg (KED) | 958.787 ppb           | 381,664 cps       | 2.2 %         |
| 27Al (KED) | 923.681 ppb           | 72,889 cps        | 1.2 %         |

| Category    | Concentration average | Intensity average | Intensity RSD |
|-------------|-----------------------|-------------------|---------------|
| 45Sc (KED)  | 109.818 %             | 30,434 cps        | 2.6 %         |
| 51V (KED)   | 1.818 ppb             | 10,600 cps        | 1.3 %         |
| 52Cr (KED)  | 4.567 ppb             | 42,515 cps        | 1.8 %         |
| 55Mn (KED)  | 24.276 ppb            | 100,986 cps       | 2.1 %         |
| 56Fe (KED)  | 959.318 ppb           | 8,024,107 cps     | 1.9 %         |
| 58Ni (KED)  | 4.468 ppb             | 53,490 cps        | 0.4 %         |
| 59Co (KED)  | 0.475 ppb             | 9,167 cps         | 0.8 %         |
| 63Cu (KED)  | 6.242 ppb             | 84,372 cps        | 2.6 %         |
| 64Zn (KED)  | 183.744 ppb           | 598,264 cps       | 0.7 %         |
| 69Ga (KED)  | 2.451 ppb             | 9,386 cps         | 1.7 %         |
| 75As (KED)  | 1.162 ppb             | 1,073 cps         | 3.0 %         |
| 80Se (KED)  | 0.491 ppb             | 640 cps           | 8.2 %         |
| 85Rb (KED)  | 2.115 ppb             | 7,458 cps         | 1.8 %         |
| 88Sr (KED)  | 11.546 ppb            | 56,783 cps        | 1.5 %         |
| 89Y (KED)   | 98.666 %              | 287,317 cps       | 0.5 %         |
| 107Ag (KED) | 0.057 ppb             | 2,274 cps         | 3.7 %         |
| 114Cd (KED) | 0.058 ppb             | 947 cps           | 7.1 %         |
| 115In (KED) | 88.958 %              | 542,163 cps       | 0.2 %         |
| 133Cs (KED) | 0.190 ppb             | 3,574 cps         | 0.8 %         |
| 138Ba (KED) | 8.673 ppb             | 249,257 cps       | 0.3 %         |
| 139La (KED) | 0.716 ppb             | 44,610 cps        | 0.7 %         |
| 140Ce (KED) | 1.432 ppb             | 124,611 cps       | 2.9 %         |
| 141Pr (KED) | 0.173 ppb             | 15,276 cps        | 3.4 %         |
| 142Nd (KED) | 0.887 ppb             | 32,235 cps        | 0.6 %         |
| 152Sm (KED) | 0.131 ppb             | 4,581 cps         | 1.6 %         |
| 153Eu (KED) | 0.034 ppb             | 2,346 cps         | 5.4 %         |
| 158Gd (KED) | 0.120 ppb             | 6,185 cps         | 3.6 %         |
| 159Tb (KED) | 92.505 %              | 3,650,247 cps     | 0.6 %         |
| 164Dy (KED) | 0.086 ppb             | 4,847 cps         | 1.5 %         |
| 166Er (KED) | 0.049 ppb             | 3,765 cps         | 3.6 %         |
| 169Tm (KED) | 0.015 ppb             | 3,572 cps         | 13.0 %        |
| 174Yb (KED) | 0.040 ppb             | 3,436 cps         | 10.3 %        |
| 175Lu (KED) | -0.041 ppb            | 23,997 cps        | 3.7 %         |
| 205Tl (KED) | 0.031 ppb             | 4,995 cps         | 7.0 %         |
| 208Pb (KED) | 1.110 ppb             | 149,111 cps       | 2.5 %         |
| 209Bi (KED) | 79.771 %              | 3,209,467 cps     | 1.2 %         |
| 232Th (KED) | 0.304 ppb             | 66,776 cps        | 3.1 %         |
| 238U (KED)  | 0.124 ppb             | 32,518 cps        | 4.1 %         |

## Sample Summary

Instrument ID: iCAP Q

Analysis index: 8

Analysis name: 152923011915jian

Analysis started at: 9/8/2021 3:59:56 PM

User name: WINDOWS-UPCI4ER\Administrator

| Category    | Concentration average | Concentration RSD |
|-------------|-----------------------|-------------------|
| 6Li (KED)   | 119.775 %             | 5.6 %             |
| 9Be (KED)   | 0.063 ppb             | 91.3 %            |
| 11B (KED)   | -2.075 ppb            | 49.8 %            |
| 24Mg (KED)  | 1,055.182 ppb         | 5.2 %             |
| 27Al (KED)  | 996.420 ppb           | 1.0 %             |
| 45Sc (KED)  | 114.568 %             | 0.8 %             |
| 51V (KED)   | 1.954 ppb             | 1.1 %             |
| 52Cr (KED)  | 3.499 ppb             | 1.3 %             |
| 55Mn (KED)  | 27.456 ppb            | 0.6 %             |
| 56Fe (KED)  | 1,101.767 ppb         | 0.6 %             |
| 58Ni (KED)  | 4.975 ppb             | 1.4 %             |
| 59Co (KED)  | 0.547 ppb             | 0.8 %             |
| 63Cu (KED)  | 9.919 ppb             | 2.1 %             |
| 64Zn (KED)  | 186.072 ppb           | 1.7 %             |
| 69Ga (KED)  | 2.870 ppb             | 1.1 %             |
| 75As (KED)  | 1.027 ppb             | 3.1 %             |
| 80Se (KED)  | 0.280 ppb             | 89.5 %            |
| 85Rb (KED)  | 1.965 ppb             | 0.7 %             |
| 88Sr (KED)  | 14.079 ppb            | 1.0 %             |
| 89Y (KED)   | 100.151 %             | 1.6 %             |
| 107Ag (KED) | 0.057 ppb             | 2.7 %             |
| 114Cd (KED) | 0.053 ppb             | 11.0 %            |
| 115In (KED) | 90.141 %              | 1.5 %             |
| 133Cs (KED) | 0.201 ppb             | 1.0 %             |
| 138Ba (KED) | 9.473 ppb             | 1.9 %             |
| 139La (KED) | 0.783 ppb             | 2.1 %             |
| 140Ce (KED) | 1.633 ppb             | 3.0 %             |
| 141Pr (KED) | 0.187 ppb             | 3.8 %             |
| 142Nd (KED) | 1.003 ppb             | 3.4 %             |
| 152Sm (KED) | 0.139 ppb             | 2.9 %             |
| 153Eu (KED) | 0.029 ppb             | 2.0 %             |
| 158Gd (KED) | 0.129 ppb             | 0.4 %             |
| 159Tb (KED) | 91.242 %              | 2.7 %             |
| 164Dy (KED) | 0.089 ppb             | 2.1 %             |
| 166Er (KED) | 0.043 ppb             | 7.0 %             |
| 169Tm (KED) | 0.007 ppb             | 6.1 %             |
| 174Yb (KED) | 0.036 ppb             | 3.4 %             |
| 175Lu (KED) | -0.059 ppb            | 8.1 %             |
| 205Tl (KED) | 0.021 ppb             | 5.2 %             |
| 208Pb (KED) | 1.404 ppb             | 3.3 %             |
| 209Bi (KED) | 76.476 %              | 1.7 %             |
| 232Th (KED) | 0.369 ppb             | 2.5 %             |
| 238U (KED)  | 0.140 ppb             | 0.6 %             |

| Category   | Concentration average | Intensity average | Intensity RSD |
|------------|-----------------------|-------------------|---------------|
| 6Li (KED)  | 119.775 %             | 2,585 cps         | 5.6 %         |
| 9Be (KED)  | 0.063 ppb             | 8 cps             | 89.2 %        |
| 11B (KED)  | -2.075 ppb            | 676 cps           | 3.1 %         |
| 24Mg (KED) | 1,055.182 ppb         | 425,478 cps       | 0.6 %         |
| 27Al (KED) | 996.420 ppb           | 82,044 cps        | 1.4 %         |

| Category    | Concentration average | Intensity average | Intensity RSD |
|-------------|-----------------------|-------------------|---------------|
| 45Sc (KED)  | 114.568 %             | 31,750 cps        | 0.8 %         |
| 51V (KED)   | 1.954 ppb             | 11,889 cps        | 1.6 %         |
| 52Cr (KED)  | 3.499 ppb             | 34,017 cps        | 1.2 %         |
| 55Mn (KED)  | 27.456 ppb            | 119,152 cps       | 1.1 %         |
| 56Fe (KED)  | 1,101.767 ppb         | 9,614,877 cps     | 1.4 %         |
| 58Ni (KED)  | 4.975 ppb             | 61,961 cps        | 0.5 %         |
| 59Co (KED)  | 0.547 ppb             | 10,978 cps        | 1.2 %         |
| 63Cu (KED)  | 9.919 ppb             | 135,191 cps       | 1.5 %         |
| 64Zn (KED)  | 186.072 ppb           | 614,874 cps       | 1.2 %         |
| 69Ga (KED)  | 2.870 ppb             | 11,142 cps        | 2.3 %         |
| 75As (KED)  | 1.027 ppb             | 963 cps           | 1.8 %         |
| 80Se (KED)  | 0.280 ppb             | 596 cps           | 12.6 %        |
| 85Rb (KED)  | 1.965 ppb             | 7,038 cps         | 2.1 %         |
| 88Sr (KED)  | 14.079 ppb            | 70,248 cps        | 1.8 %         |
| 89Y (KED)   | 100.151 %             | 291,640 cps       | 1.6 %         |
| 107Ag (KED) | 0.057 ppb             | 2,341 cps         | 3.8 %         |
| 114Cd (KED) | 0.053 ppb             | 882 cps           | 9.7 %         |
| 115In (KED) | 90.141 %              | 549,374 cps       | 1.5 %         |
| 133Cs (KED) | 0.201 ppb             | 3,833 cps         | 2.5 %         |
| 138Ba (KED) | 9.473 ppb             | 268,309 cps       | 0.8 %         |
| 139La (KED) | 0.783 ppb             | 48,082 cps        | 0.6 %         |
| 140Ce (KED) | 1.633 ppb             | 140,094 cps       | 0.5 %         |
| 141Pr (KED) | 0.187 ppb             | 16,196 cps        | 2.7 %         |
| 142Nd (KED) | 1.003 ppb             | 35,904 cps        | 0.8 %         |
| 152Sm (KED) | 0.139 ppb             | 4,811 cps         | 2.5 %         |
| 153Eu (KED) | 0.029 ppb             | 2,005 cps         | 0.7 %         |
| 158Gd (KED) | 0.129 ppb             | 6,519 cps         | 3.1 %         |
| 159Tb (KED) | 91.242 %              | 3,600,442 cps     | 2.7 %         |
| 164Dy (KED) | 0.089 ppb             | 4,942 cps         | 4.3 %         |
| 166Er (KED) | 0.043 ppb             | 3,330 cps         | 3.9 %         |
| 169Tm (KED) | 0.007 ppb             | 1,671 cps         | 3.3 %         |
| 174Yb (KED) | 0.036 ppb             | 3,031 cps         | 4.6 %         |
| 175Lu (KED) | -0.059 ppb            | 21,452 cps        | 3.2 %         |
| 205Tl (KED) | 0.021 ppb             | 3,279 cps         | 3.6 %         |
| 208Pb (KED) | 1.404 ppb             | 174,666 cps       | 1.4 %         |
| 209Bi (KED) | 76.476 %              | 3,076,889 cps     | 1.7 %         |
| 232Th (KED) | 0.369 ppb             | 77,481 cps        | 0.8 %         |
| 238U (KED)  | 0.140 ppb             | 35,034 cps        | 1.3 %         |

## Sample Summary

Instrument ID: iCAP Q

Analysis index: 9

Analysis name: 001jian

Analysis started at: 9/8/2021 4:03:20 PM

User name: WINDOWS-UPCI4ER\Administrator

| Category    | Concentration average | Concentration RSD |
|-------------|-----------------------|-------------------|
| 6Li (KED)   | 125.080 %             | 7.0 %             |
| 9Be (KED)   | 0.051 ppb             | 51.6 %            |
| 11B (KED)   | -6.400 ppb            | 8.2 %             |
| 24Mg (KED)  | 789.288 ppb           | 7.9 %             |
| 27Al (KED)  | 682.807 ppb           | 2.7 %             |
| 45Sc (KED)  | 117.089 %             | 1.3 %             |
| 51V (KED)   | 1.354 ppb             | 0.7 %             |
| 52Cr (KED)  | 2.550 ppb             | 1.7 %             |
| 55Mn (KED)  | 19.713 ppb            | 0.9 %             |
| 56Fe (KED)  | 737.724 ppb           | 2.0 %             |
| 58Ni (KED)  | 3.595 ppb             | 1.1 %             |
| 59Co (KED)  | 0.364 ppb             | 2.1 %             |
| 63Cu (KED)  | 7.664 ppb             | 1.5 %             |
| 64Zn (KED)  | 179.845 ppb           | 2.7 %             |
| 69Ga (KED)  | 2.007 ppb             | 3.4 %             |
| 75As (KED)  | 0.846 ppb             | 2.1 %             |
| 80Se (KED)  | 0.384 ppb             | 60.5 %            |
| 85Rb (KED)  | 1.556 ppb             | 6.2 %             |
| 88Sr (KED)  | 9.345 ppb             | 1.0 %             |
| 89Y (KED)   | 100.371 %             | 1.1 %             |
| 107Ag (KED) | 0.046 ppb             | 7.1 %             |
| 114Cd (KED) | 0.036 ppb             | 11.7 %            |
| 115In (KED) | 88.889 %              | 1.5 %             |
| 133Cs (KED) | 0.143 ppb             | 1.1 %             |
| 138Ba (KED) | 6.621 ppb             | 1.1 %             |
| 139La (KED) | 0.533 ppb             | 1.2 %             |
| 140Ce (KED) | 1.089 ppb             | 1.7 %             |
| 141Pr (KED) | 0.125 ppb             | 0.9 %             |
| 142Nd (KED) | 0.662 ppb             | 1.3 %             |
| 152Sm (KED) | 0.089 ppb             | 2.3 %             |
| 153Eu (KED) | 0.018 ppb             | 5.6 %             |
| 158Gd (KED) | 0.082 ppb             | 2.8 %             |
| 159Tb (KED) | 89.836 %              | 1.5 %             |
| 164Dy (KED) | 0.058 ppb             | 4.4 %             |
| 166Er (KED) | 0.026 ppb             | 9.0 %             |
| 169Tm (KED) | 0.004 ppb             | 1.3 %             |
| 174Yb (KED) | 0.024 ppb             | 4.0 %             |
| 175Lu (KED) | -0.067 ppb            | 10.9 %            |
| 205Tl (KED) | 0.016 ppb             | 5.9 %             |
| 208Pb (KED) | 0.900 ppb             | 1.6 %             |
| 209Bi (KED) | 75.358 %              | 2.0 %             |
| 232Th (KED) | 0.197 ppb             | 0.9 %             |
| 238U (KED)  | 0.077 ppb             | 2.5 %             |

| Category   | Concentration average | Intensity average | Intensity RSD |
|------------|-----------------------|-------------------|---------------|
| 6Li (KED)  | 125.080 %             | 2,699 cps         | 7.0 %         |
| 9Be (KED)  | 0.051 ppb             | 7 cps             | 50.0 %        |
| 11B (KED)  | -6.400 ppb            | 443 cps           | 11.4 %        |
| 24Mg (KED) | 789.288 ppb           | 331,909 cps       | 1.7 %         |
| 27Al (KED) | 682.807 ppb           | 57,473 cps        | 1.4 %         |

| Category    | Concentration average | Intensity average | Intensity RSD |
|-------------|-----------------------|-------------------|---------------|
| 45Sc (KED)  | 117.089 %             | 32,449 cps        | 1.3 %         |
| 51V (KED)   | 1.354 ppb             | 8,422 cps         | 1.9 %         |
| 52Cr (KED)  | 2.550 ppb             | 25,372 cps        | 1.1 %         |
| 55Mn (KED)  | 19.713 ppb            | 87,464 cps        | 1.5 %         |
| 56Fe (KED)  | 737.724 ppb           | 6,580,042 cps     | 1.2 %         |
| 58Ni (KED)  | 3.595 ppb             | 46,261 cps        | 0.5 %         |
| 59Co (KED)  | 0.364 ppb             | 7,535 cps         | 1.4 %         |
| 63Cu (KED)  | 7.664 ppb             | 105,048 cps       | 1.4 %         |
| 64Zn (KED)  | 179.845 ppb           | 595,651 cps       | 2.0 %         |
| 69Ga (KED)  | 2.007 ppb             | 7,834 cps         | 2.8 %         |
| 75As (KED)  | 0.846 ppb             | 798 cps           | 3.1 %         |
| 80Se (KED)  | 0.384 ppb             | 623 cps           | 9.8 %         |
| 85Rb (KED)  | 1.556 ppb             | 5,595 cps         | 5.5 %         |
| 88Sr (KED)  | 9.345 ppb             | 46,784 cps        | 1.6 %         |
| 89Y (KED)   | 100.371 %             | 292,281 cps       | 1.1 %         |
| 107Ag (KED) | 0.046 ppb             | 1,846 cps         | 6.6 %         |
| 114Cd (KED) | 0.036 ppb             | 639 cps           | 7.6 %         |
| 115In (KED) | 88.889 %              | 541,745 cps       | 1.5 %         |
| 133Cs (KED) | 0.143 ppb             | 2,696 cps         | 2.5 %         |
| 138Ba (KED) | 6.621 ppb             | 185,187 cps       | 1.3 %         |
| 139La (KED) | 0.533 ppb             | 32,293 cps        | 1.4 %         |
| 140Ce (KED) | 1.089 ppb             | 92,177 cps        | 0.5 %         |
| 141Pr (KED) | 0.125 ppb             | 10,686 cps        | 2.3 %         |
| 142Nd (KED) | 0.662 ppb             | 23,386 cps        | 1.3 %         |
| 152Sm (KED) | 0.089 ppb             | 3,047 cps         | 3.1 %         |
| 153Eu (KED) | 0.018 ppb             | 1,209 cps         | 6.3 %         |
| 158Gd (KED) | 0.082 ppb             | 4,121 cps         | 2.5 %         |
| 159Tb (KED) | 89.836 %              | 3,544,946 cps     | 1.5 %         |
| 164Dy (KED) | 0.058 ppb             | 3,184 cps         | 3.4 %         |
| 166Er (KED) | 0.026 ppb             | 2,166 cps         | 7.5 %         |
| 169Tm (KED) | 0.004 ppb             | 888 cps           | 2.7 %         |
| 174Yb (KED) | 0.024 ppb             | 1,957 cps         | 3.6 %         |
| 175Lu (KED) | -0.067 ppb            | 20,170 cps        | 3.0 %         |
| 205Tl (KED) | 0.016 ppb             | 2,406 cps         | 4.0 %         |
| 208Pb (KED) | 0.900 ppb             | 118,503 cps       | 0.8 %         |
| 209Bi (KED) | 75.358 %              | 3,031,933 cps     | 2.0 %         |
| 232Th (KED) | 0.197 ppb             | 40,961 cps        | 1.3 %         |
| 238U (KED)  | 0.077 ppb             | 19,178 cps        | 1.6 %         |

## Sample Summary

Instrument ID: iCAP Q

Analysis index: 10

Analysis name: 152923028597jian

Analysis started at: 9/8/2021 4:06:46 PM

User name: WINDOWS-UPCI4ER\Administrator

| Category    | Concentration average | Concentration RSD |
|-------------|-----------------------|-------------------|
| 6Li (KED)   | 125.543 %             | 4.0 %             |
| 9Be (KED)   | 0.033 ppb             | 86.7 %            |
| 11B (KED)   | 4.821 ppb             | 16.1 %            |
| 24Mg (KED)  | 1,441.310 ppb         | 3.1 %             |
| 27Al (KED)  | 1,252.699 ppb         | 3.8 %             |
| 45Sc (KED)  | 120.345 %             | 2.0 %             |
| 51V (KED)   | 2.642 ppb             | 3.0 %             |
| 52Cr (KED)  | 5.150 ppb             | 2.3 %             |
| 55Mn (KED)  | 38.806 ppb            | 1.7 %             |
| 56Fe (KED)  | 1,565.528 ppb         | 1.1 %             |
| 58Ni (KED)  | 6.962 ppb             | 0.2 %             |
| 59Co (KED)  | 0.745 ppb             | 2.5 %             |
| 63Cu (KED)  | 8.569 ppb             | 1.6 %             |
| 64Zn (KED)  | 170.792 ppb           | 1.9 %             |
| 69Ga (KED)  | 3.739 ppb             | 2.7 %             |
| 75As (KED)  | 1.114 ppb             | 9.0 %             |
| 80Se (KED)  | 0.809 ppb             | 13.7 %            |
| 85Rb (KED)  | 2.406 ppb             | 1.8 %             |
| 88Sr (KED)  | 18.356 ppb            | 0.8 %             |
| 89Y (KED)   | 103.003 %             | 0.4 %             |
| 107Ag (KED) | 0.064 ppb             | 2.5 %             |
| 114Cd (KED) | 0.062 ppb             | 3.9 %             |
| 115In (KED) | 89.352 %              | 0.4 %             |
| 133Cs (KED) | 0.281 ppb             | 1.9 %             |
| 138Ba (KED) | 12.964 ppb            | 0.9 %             |
| 139La (KED) | 1.161 ppb             | 1.5 %             |
| 140Ce (KED) | 2.398 ppb             | 0.5 %             |
| 141Pr (KED) | 0.270 ppb             | 4.0 %             |
| 142Nd (KED) | 1.440 ppb             | 1.0 %             |
| 152Sm (KED) | 0.196 ppb             | 2.8 %             |
| 153Eu (KED) | 0.041 ppb             | 2.6 %             |
| 158Gd (KED) | 0.180 ppb             | 1.4 %             |
| 159Tb (KED) | 88.774 %              | 1.0 %             |
| 164Dy (KED) | 0.123 ppb             | 1.2 %             |
| 166Er (KED) | 0.060 ppb             | 6.8 %             |
| 169Tm (KED) | 0.008 ppb             | 1.5 %             |
| 174Yb (KED) | 0.049 ppb             | 3.0 %             |
| 175Lu (KED) | -0.070 ppb            | 2.5 %             |
| 205Tl (KED) | 0.022 ppb             | 6.6 %             |
| 208Pb (KED) | 1.499 ppb             | 2.3 %             |
| 209Bi (KED) | 73.579 %              | 0.1 %             |
| 232Th (KED) | 0.442 ppb             | 0.1 %             |
| 238U (KED)  | 0.163 ppb             | 3.4 %             |

| Category   | Concentration average | Intensity average | Intensity RSD |
|------------|-----------------------|-------------------|---------------|
| 6Li (KED)  | 125.543 %             | 2,709 cps         | 4.0 %         |
| 9Be (KED)  | 0.033 ppb             | 4 cps             | 86.6 %        |
| 11B (KED)  | 4.821 ppb             | 1,136 cps         | 8.3 %         |
| 24Mg (KED) | 1,441.310 ppb         | 609,685 cps       | 0.9 %         |
| 27Al (KED) | 1,252.699 ppb         | 108,273 cps       | 2.3 %         |

| Category    | Concentration average | Intensity average | Intensity RSD |
|-------------|-----------------------|-------------------|---------------|
| 45Sc (KED)  | 120.345 %             | 33,351 cps        | 2.0 %         |
| 51V (KED)   | 2.642 ppb             | 16,874 cps        | 1.1 %         |
| 52Cr (KED)  | 5.150 ppb             | 52,517 cps        | 0.5 %         |
| 55Mn (KED)  | 38.806 ppb            | 176,802 cps       | 0.9 %         |
| 56Fe (KED)  | 1,565.528 ppb         | 14,346,291 cps    | 1.1 %         |
| 58Ni (KED)  | 6.962 ppb             | 90,324 cps        | 2.0 %         |
| 59Co (KED)  | 0.745 ppb             | 15,626 cps        | 3.2 %         |
| 63Cu (KED)  | 8.569 ppb             | 120,359 cps       | 1.7 %         |
| 64Zn (KED)  | 170.792 ppb           | 580,703 cps       | 2.1 %         |
| 69Ga (KED)  | 3.739 ppb             | 14,903 cps        | 2.5 %         |
| 75As (KED)  | 1.114 ppb             | 1,074 cps         | 8.5 %         |
| 80Se (KED)  | 0.809 ppb             | 753 cps           | 3.8 %         |
| 85Rb (KED)  | 2.406 ppb             | 8,848 cps         | 2.1 %         |
| 88Sr (KED)  | 18.356 ppb            | 94,150 cps        | 1.1 %         |
| 89Y (KED)   | 103.003 %             | 299,946 cps       | 0.4 %         |
| 107Ag (KED) | 0.064 ppb             | 2,582 cps         | 2.5 %         |
| 114Cd (KED) | 0.062 ppb             | 1,006 cps         | 3.4 %         |
| 115In (KED) | 89.352 %              | 544,567 cps       | 0.4 %         |
| 133Cs (KED) | 0.281 ppb             | 5,306 cps         | 1.5 %         |
| 138Ba (KED) | 12.964 ppb            | 356,752 cps       | 1.5 %         |
| 139La (KED) | 1.161 ppb             | 69,265 cps        | 1.4 %         |
| 140Ce (KED) | 2.398 ppb             | 200,004 cps       | 0.8 %         |
| 141Pr (KED) | 0.270 ppb             | 22,821 cps        | 3.0 %         |
| 142Nd (KED) | 1.440 ppb             | 50,140 cps        | 0.4 %         |
| 152Sm (KED) | 0.196 ppb             | 6,586 cps         | 1.8 %         |
| 153Eu (KED) | 0.041 ppb             | 2,723 cps         | 3.6 %         |
| 158Gd (KED) | 0.180 ppb             | 8,872 cps         | 1.4 %         |
| 159Tb (KED) | 88.774 %              | 3,503,024 cps     | 1.0 %         |
| 164Dy (KED) | 0.123 ppb             | 6,685 cps         | 2.0 %         |
| 166Er (KED) | 0.060 ppb             | 4,345 cps         | 6.5 %         |
| 169Tm (KED) | 0.008 ppb             | 1,740 cps         | 0.5 %         |
| 174Yb (KED) | 0.049 ppb             | 4,036 cps         | 3.9 %         |
| 175Lu (KED) | -0.070 ppb            | 19,512 cps        | 1.5 %         |
| 205Tl (KED) | 0.022 ppb             | 3,295 cps         | 6.5 %         |
| 208Pb (KED) | 1.499 ppb             | 177,915 cps       | 1.9 %         |
| 209Bi (KED) | 73.579 %              | 2,960,352 cps     | 0.1 %         |
| 232Th (KED) | 0.442 ppb             | 89,401 cps        | 0.2 %         |
| 238U (KED)  | 0.163 ppb             | 39,378 cps        | 3.5 %         |

## Sample Summary

Instrument ID: iCAP Q

Analysis index: 11

Analysis name: 002jian

Analysis started at: 9/8/2021 4:10:12 PM

User name: WINDOWS-UPCI4ER\Administrator

| Category    | Concentration average | Concentration RSD |
|-------------|-----------------------|-------------------|
| 6Li (KED)   | 122.659 %             | 2.8 %             |
| 9Be (KED)   | 0.017 ppb             | 173.2 %           |
| 11B (KED)   | -6.599 ppb            | 18.1 %            |
| 24Mg (KED)  | 868.466 ppb           | 3.0 %             |
| 27Al (KED)  | 750.850 ppb           | 0.6 %             |
| 45Sc (KED)  | 118.267 %             | 0.8 %             |
| 51V (KED)   | 1.444 ppb             | 1.2 %             |
| 52Cr (KED)  | 4.143 ppb             | 1.8 %             |
| 55Mn (KED)  | 21.237 ppb            | 0.9 %             |
| 56Fe (KED)  | 797.823 ppb           | 1.7 %             |
| 58Ni (KED)  | 3.660 ppb             | 1.7 %             |
| 59Co (KED)  | 0.400 ppb             | 2.7 %             |
| 63Cu (KED)  | 6.323 ppb             | 2.1 %             |
| 64Zn (KED)  | 189.505 ppb           | 1.5 %             |
| 69Ga (KED)  | 2.523 ppb             | 0.4 %             |
| 75As (KED)  | 0.993 ppb             | 4.7 %             |
| 80Se (KED)  | 0.892 ppb             | 15.4 %            |
| 85Rb (KED)  | 1.765 ppb             | 2.8 %             |
| 88Sr (KED)  | 10.826 ppb            | 3.0 %             |
| 89Y (KED)   | 99.941 %              | 1.2 %             |
| 107Ag (KED) | 0.085 ppb             | 4.4 %             |
| 114Cd (KED) | 0.054 ppb             | 0.8 %             |
| 115In (KED) | 87.796 %              | 1.1 %             |
| 133Cs (KED) | 0.162 ppb             | 6.5 %             |
| 138Ba (KED) | 8.339 ppb             | 0.5 %             |
| 139La (KED) | 0.606 ppb             | 1.1 %             |
| 140Ce (KED) | 1.239 ppb             | 1.2 %             |
| 141Pr (KED) | 0.140 ppb             | 1.7 %             |
| 142Nd (KED) | 0.752 ppb             | 0.5 %             |
| 152Sm (KED) | 0.105 ppb             | 4.6 %             |
| 153Eu (KED) | 0.021 ppb             | 1.3 %             |
| 158Gd (KED) | 0.095 ppb             | 8.7 %             |
| 159Tb (KED) | 86.853 %              | 1.0 %             |
| 164Dy (KED) | 0.065 ppb             | 3.3 %             |
| 166Er (KED) | 0.031 ppb             | 3.0 %             |
| 169Tm (KED) | 0.004 ppb             | 2.1 %             |
| 174Yb (KED) | 0.025 ppb             | 4.1 %             |
| 175Lu (KED) | -0.079 ppb            | 6.5 %             |
| 205Tl (KED) | 0.015 ppb             | 5.3 %             |
| 208Pb (KED) | 1.191 ppb             | 0.9 %             |
| 209Bi (KED) | 72.976 %              | 0.3 %             |
| 232Th (KED) | 0.214 ppb             | 1.4 %             |
| 238U (KED)  | 0.086 ppb             | 3.0 %             |

| Category   | Concentration average | Intensity average | Intensity RSD |
|------------|-----------------------|-------------------|---------------|
| 6Li (KED)  | 122.659 %             | 2,647 cps         | 2.8 %         |
| 9Be (KED)  | 0.017 ppb             | 2 cps             | 173.2 %       |
| 11B (KED)  | -6.599 ppb            | 421 cps           | 14.4 %        |
| 24Mg (KED) | 868.466 ppb           | 359,199 cps       | 0.3 %         |
| 27Al (KED) | 750.850 ppb           | 63,842 cps        | 1.0 %         |

| Category    | Concentration average | Intensity average | Intensity RSD |
|-------------|-----------------------|-------------------|---------------|
| 45Sc (KED)  | 118.267 %             | 32,775 cps        | 0.8 %         |
| 51V (KED)   | 1.444 ppb             | 9,072 cps         | 0.4 %         |
| 52Cr (KED)  | 4.143 ppb             | 41,554 cps        | 1.3 %         |
| 55Mn (KED)  | 21.237 ppb            | 95,164 cps        | 0.6 %         |
| 56Fe (KED)  | 797.823 ppb           | 7,187,735 cps     | 0.9 %         |
| 58Ni (KED)  | 3.660 ppb             | 47,539 cps        | 0.9 %         |
| 59Co (KED)  | 0.400 ppb             | 8,358 cps         | 3.4 %         |
| 63Cu (KED)  | 6.323 ppb             | 86,544 cps        | 1.1 %         |
| 64Zn (KED)  | 189.505 ppb           | 624,884 cps       | 0.5 %         |
| 69Ga (KED)  | 2.523 ppb             | 9,785 cps         | 1.4 %         |
| 75As (KED)  | 0.993 ppb             | 930 cps           | 4.8 %         |
| 80Se (KED)  | 0.892 ppb             | 752 cps           | 4.1 %         |
| 85Rb (KED)  | 1.765 ppb             | 6,314 cps         | 3.4 %         |
| 88Sr (KED)  | 10.826 ppb            | 53,924 cps        | 1.9 %         |
| 89Y (KED)   | 99.941 %              | 291,028 cps       | 1.2 %         |
| 107Ag (KED) | 0.085 ppb             | 3,357 cps         | 3.9 %         |
| 114Cd (KED) | 0.054 ppb             | 876 cps           | 1.0 %         |
| 115In (KED) | 87.796 %              | 535,082 cps       | 1.1 %         |
| 133Cs (KED) | 0.162 ppb             | 3,013 cps         | 6.1 %         |
| 138Ba (KED) | 8.339 ppb             | 225,087 cps       | 1.3 %         |
| 139La (KED) | 0.606 ppb             | 35,444 cps        | 1.8 %         |
| 140Ce (KED) | 1.239 ppb             | 101,336 cps       | 1.0 %         |
| 141Pr (KED) | 0.140 ppb             | 11,603 cps        | 1.4 %         |
| 142Nd (KED) | 0.752 ppb             | 25,655 cps        | 0.5 %         |
| 152Sm (KED) | 0.105 ppb             | 3,456 cps         | 5.5 %         |
| 153Eu (KED) | 0.021 ppb             | 1,382 cps         | 2.1 %         |
| 158Gd (KED) | 0.095 ppb             | 4,578 cps         | 7.9 %         |
| 159Tb (KED) | 86.853 %              | 3,427,237 cps     | 1.0 %         |
| 164Dy (KED) | 0.065 ppb             | 3,454 cps         | 3.4 %         |
| 166Er (KED) | 0.031 ppb             | 2,388 cps         | 1.7 %         |
| 169Tm (KED) | 0.004 ppb             | 956 cps           | 2.0 %         |
| 174Yb (KED) | 0.025 ppb             | 2,020 cps         | 3.6 %         |
| 175Lu (KED) | -0.079 ppb            | 18,069 cps        | 3.1 %         |
| 205Tl (KED) | 0.015 ppb             | 2,286 cps         | 5.0 %         |
| 208Pb (KED) | 1.191 ppb             | 144,779 cps       | 0.6 %         |
| 209Bi (KED) | 72.976 %              | 2,936,081 cps     | 0.3 %         |
| 232Th (KED) | 0.214 ppb             | 43,011 cps        | 1.5 %         |
| 238U (KED)  | 0.086 ppb             | 20,618 cps        | 2.9 %         |

## Sample Summary

Instrument ID: iCAP Q

Analysis index: 12

Analysis name: 15292301511jian

Analysis started at: 9/8/2021 4:13:34 PM

User name: WINDOWS-UPCI4ER\Administrator

| Category    | Concentration average | Concentration RSD |
|-------------|-----------------------|-------------------|
| 6Li (KED)   | 128.582 %             | 3.0 %             |
| 9Be (KED)   | 0.033 ppb             | 116.0 %           |
| 11B (KED)   | -4.693 ppb            | 9.0 %             |
| 24Mg (KED)  | 1,046.051 ppb         | 3.7 %             |
| 27Al (KED)  | 761.346 ppb           | 1.1 %             |
| 45Sc (KED)  | 121.640 %             | 1.9 %             |
| 51V (KED)   | 1.522 ppb             | 1.2 %             |
| 52Cr (KED)  | 3.153 ppb             | 1.9 %             |
| 55Mn (KED)  | 23.401 ppb            | 3.0 %             |
| 56Fe (KED)  | 960.603 ppb           | 2.5 %             |
| 58Ni (KED)  | 4.131 ppb             | 3.9 %             |
| 59Co (KED)  | 0.425 ppb             | 2.9 %             |
| 63Cu (KED)  | 9.392 ppb             | 0.1 %             |
| 64Zn (KED)  | 190.487 ppb           | 1.5 %             |
| 69Ga (KED)  | 2.332 ppb             | 0.3 %             |
| 75As (KED)  | 0.947 ppb             | 3.1 %             |
| 80Se (KED)  | 0.638 ppb             | 11.9 %            |
| 85Rb (KED)  | 1.574 ppb             | 1.8 %             |
| 88Sr (KED)  | 12.323 ppb            | 1.4 %             |
| 89Y (KED)   | 102.847 %             | 1.4 %             |
| 107Ag (KED) | 0.054 ppb             | 1.5 %             |
| 114Cd (KED) | 0.040 ppb             | 16.7 %            |
| 115In (KED) | 88.277 %              | 0.3 %             |
| 133Cs (KED) | 0.158 ppb             | 0.2 %             |
| 138Ba (KED) | 7.631 ppb             | 1.7 %             |
| 139La (KED) | 0.664 ppb             | 1.2 %             |
| 140Ce (KED) | 1.362 ppb             | 2.4 %             |
| 141Pr (KED) | 0.153 ppb             | 2.8 %             |
| 142Nd (KED) | 0.837 ppb             | 2.0 %             |
| 152Sm (KED) | 0.113 ppb             | 1.8 %             |
| 153Eu (KED) | 0.023 ppb             | 1.5 %             |
| 158Gd (KED) | 0.101 ppb             | 5.6 %             |
| 159Tb (KED) | 87.270 %              | 1.6 %             |
| 164Dy (KED) | 0.070 ppb             | 2.8 %             |
| 166Er (KED) | 0.033 ppb             | 2.9 %             |
| 169Tm (KED) | 0.004 ppb             | 4.8 %             |
| 174Yb (KED) | 0.027 ppb             | 2.6 %             |
| 175Lu (KED) | -0.081 ppb            | 5.5 %             |
| 205Tl (KED) | 0.017 ppb             | 3.9 %             |
| 208Pb (KED) | 1.023 ppb             | 2.6 %             |
| 209Bi (KED) | 73.040 %              | 1.2 %             |
| 232Th (KED) | 0.234 ppb             | 2.1 %             |
| 238U (KED)  | 0.098 ppb             | 1.0 %             |

| Category   | Concentration average | Intensity average | Intensity RSD |
|------------|-----------------------|-------------------|---------------|
| 6Li (KED)  | 128.582 %             | 2,775 cps         | 3.0 %         |
| 9Be (KED)  | 0.033 ppb             | 4 cps             | 114.6 %       |
| 11B (KED)  | -4.693 ppb            | 563 cps           | 7.8 %         |
| 24Mg (KED) | 1,046.051 ppb         | 453,357 cps       | 0.8 %         |
| 27Al (KED) | 761.346 ppb           | 66,571 cps        | 1.0 %         |

| Category    | Concentration average | Intensity average | Intensity RSD |
|-------------|-----------------------|-------------------|---------------|
| 45Sc (KED)  | 121.640 %             | 33,710 cps        | 1.9 %         |
| 51V (KED)   | 1.522 ppb             | 9,834 cps         | 1.1 %         |
| 52Cr (KED)  | 3.153 ppb             | 32,558 cps        | 0.8 %         |
| 55Mn (KED)  | 23.401 ppb            | 107,802 cps       | 1.3 %         |
| 56Fe (KED)  | 960.603 ppb           | 8,898,093 cps     | 1.0 %         |
| 58Ni (KED)  | 4.131 ppb             | 54,927 cps        | 2.0 %         |
| 59Co (KED)  | 0.425 ppb             | 9,113 cps         | 2.3 %         |
| 63Cu (KED)  | 9.392 ppb             | 131,570 cps       | 1.4 %         |
| 64Zn (KED)  | 190.487 ppb           | 646,363 cps       | 0.1 %         |
| 69Ga (KED)  | 2.332 ppb             | 9,311 cps         | 1.5 %         |
| 75As (KED)  | 0.947 ppb             | 913 cps           | 4.2 %         |
| 80Se (KED)  | 0.638 ppb             | 707 cps           | 3.9 %         |
| 85Rb (KED)  | 1.574 ppb             | 5,800 cps         | 2.3 %         |
| 88Sr (KED)  | 12.323 ppb            | 63,169 cps        | 2.7 %         |
| 89Y (KED)   | 102.847 %             | 299,492 cps       | 1.4 %         |
| 107Ag (KED) | 0.054 ppb             | 2,156 cps         | 1.3 %         |
| 114Cd (KED) | 0.040 ppb             | 681 cps           | 13.0 %        |
| 115In (KED) | 88.277 %              | 538,015 cps       | 0.3 %         |
| 133Cs (KED) | 0.158 ppb             | 2,969 cps         | 0.5 %         |
| 138Ba (KED) | 7.631 ppb             | 207,092 cps       | 1.3 %         |
| 139La (KED) | 0.664 ppb             | 39,023 cps        | 1.4 %         |
| 140Ce (KED) | 1.362 ppb             | 111,884 cps       | 1.6 %         |
| 141Pr (KED) | 0.153 ppb             | 12,735 cps        | 1.4 %         |
| 142Nd (KED) | 0.837 ppb             | 28,700 cps        | 1.3 %         |
| 152Sm (KED) | 0.113 ppb             | 3,758 cps         | 3.0 %         |
| 153Eu (KED) | 0.023 ppb             | 1,529 cps         | 2.3 %         |
| 158Gd (KED) | 0.101 ppb             | 4,905 cps         | 5.6 %         |
| 159Tb (KED) | 87.270 %              | 3,443,698 cps     | 1.6 %         |
| 164Dy (KED) | 0.070 ppb             | 3,719 cps         | 1.2 %         |
| 166Er (KED) | 0.033 ppb             | 2,522 cps         | 4.1 %         |
| 169Tm (KED) | 0.004 ppb             | 980 cps           | 6.2 %         |
| 174Yb (KED) | 0.027 ppb             | 2,216 cps         | 3.0 %         |
| 175Lu (KED) | -0.081 ppb            | 17,863 cps        | 2.0 %         |
| 205Tl (KED) | 0.017 ppb             | 2,571 cps         | 3.8 %         |
| 208Pb (KED) | 1.023 ppb             | 127,593 cps       | 3.3 %         |
| 209Bi (KED) | 73.040 %              | 2,938,666 cps     | 1.2 %         |
| 232Th (KED) | 0.234 ppb             | 47,101 cps        | 1.2 %         |
| 238U (KED)  | 0.098 ppb             | 23,460 cps        | 1.0 %         |

## Sample Summary

Instrument ID: iCAP Q

Analysis index: 13

Analysis name: 152923020253jian

Analysis started at: 9/8/2021 4:17:06 PM

User name: WINDOWS-UPCI4ER\Administrator

| Category    | Concentration average | Concentration RSD |
|-------------|-----------------------|-------------------|
| 6Li (KED)   | 132.650 %             | 2.4 %             |
| 9Be (KED)   | 0.008 ppb             | 173.2 %           |
| 11B (KED)   | -1.835 ppb            | 56.0 %            |
| 24Mg (KED)  | 1,451.723 ppb         | 2.6 %             |
| 27Al (KED)  | 641.437 ppb           | 1.4 %             |
| 45Sc (KED)  | 125.310 %             | 2.4 %             |
| 51V (KED)   | 1.183 ppb             | 7.6 %             |
| 52Cr (KED)  | 2.343 ppb             | 1.6 %             |
| 55Mn (KED)  | 17.640 ppb            | 1.6 %             |
| 56Fe (KED)  | 631.916 ppb           | 2.7 %             |
| 58Ni (KED)  | 3.045 ppb             | 3.5 %             |
| 59Co (KED)  | 0.311 ppb             | 2.6 %             |
| 63Cu (KED)  | 8.896 ppb             | 3.1 %             |
| 64Zn (KED)  | 198.053 ppb           | 2.2 %             |
| 69Ga (KED)  | 2.069 ppb             | 3.7 %             |
| 75As (KED)  | 0.925 ppb             | 4.2 %             |
| 80Se (KED)  | 0.556 ppb             | 32.0 %            |
| 85Rb (KED)  | 1.942 ppb             | 2.9 %             |
| 88Sr (KED)  | 14.340 ppb            | 1.8 %             |
| 89Y (KED)   | 99.023 %              | 0.8 %             |
| 107Ag (KED) | 0.066 ppb             | 2.2 %             |
| 114Cd (KED) | 0.034 ppb             | 5.9 %             |
| 115In (KED) | 87.772 %              | 0.2 %             |
| 133Cs (KED) | 0.128 ppb             | 8.0 %             |
| 138Ba (KED) | 6.538 ppb             | 2.1 %             |
| 139La (KED) | 0.477 ppb             | 2.2 %             |
| 140Ce (KED) | 1.005 ppb             | 1.1 %             |
| 141Pr (KED) | 0.113 ppb             | 4.2 %             |
| 142Nd (KED) | 0.611 ppb             | 2.8 %             |
| 152Sm (KED) | 0.084 ppb             | 1.6 %             |
| 153Eu (KED) | 0.016 ppb             | 6.9 %             |
| 158Gd (KED) | 0.074 ppb             | 2.1 %             |
| 159Tb (KED) | 86.386 %              | 0.9 %             |
| 164Dy (KED) | 0.051 ppb             | 4.1 %             |
| 166Er (KED) | 0.023 ppb             | 2.9 %             |
| 169Tm (KED) | 0.003 ppb             | 3.6 %             |
| 174Yb (KED) | 0.020 ppb             | 4.6 %             |
| 175Lu (KED) | -0.083 ppb            | 4.4 %             |
| 205Tl (KED) | 0.015 ppb             | 1.3 %             |
| 208Pb (KED) | 1.236 ppb             | 1.9 %             |
| 209Bi (KED) | 68.939 %              | 1.7 %             |
| 232Th (KED) | 0.173 ppb             | 1.7 %             |
| 238U (KED)  | 0.081 ppb             | 2.0 %             |

| Category   | Concentration average | Intensity average | Intensity RSD |
|------------|-----------------------|-------------------|---------------|
| 6Li (KED)  | 132.650 %             | 2,863 cps         | 2.4 %         |
| 9Be (KED)  | 0.008 ppb             | 1 cps             | 173.2 %       |
| 11B (KED)  | -1.835 ppb            | 766 cps           | 7.2 %         |
| 24Mg (KED) | 1,451.723 ppb         | 649,108 cps       | 0.7 %         |
| 27Al (KED) | 641.437 ppb           | 57,791 cps        | 1.4 %         |

| Category    | Concentration average | Intensity average | Intensity RSD |
|-------------|-----------------------|-------------------|---------------|
| 45Sc (KED)  | 125.310 %             | 34,727 cps        | 2.4 %         |
| 51V (KED)   | 1.183 ppb             | 7,870 cps         | 5.4 %         |
| 52Cr (KED)  | 2.343 ppb             | 24,966 cps        | 1.9 %         |
| 55Mn (KED)  | 17.640 ppb            | 83,761 cps        | 0.8 %         |
| 56Fe (KED)  | 631.916 ppb           | 6,031,399 cps     | 1.0 %         |
| 58Ni (KED)  | 3.045 ppb             | 42,237 cps        | 3.3 %         |
| 59Co (KED)  | 0.311 ppb             | 6,941 cps         | 1.9 %         |
| 63Cu (KED)  | 8.896 ppb             | 120,038 cps       | 2.5 %         |
| 64Zn (KED)  | 198.053 ppb           | 646,995 cps       | 1.5 %         |
| 69Ga (KED)  | 2.069 ppb             | 7,964 cps         | 3.3 %         |
| 75As (KED)  | 0.925 ppb             | 859 cps           | 4.3 %         |
| 80Se (KED)  | 0.556 ppb             | 659 cps           | 6.6 %         |
| 85Rb (KED)  | 1.942 ppb             | 6,877 cps         | 2.3 %         |
| 88Sr (KED)  | 14.340 ppb            | 70,735 cps        | 1.2 %         |
| 89Y (KED)   | 99.023 %              | 288,356 cps       | 0.8 %         |
| 107Ag (KED) | 0.066 ppb             | 2,606 cps         | 2.0 %         |
| 114Cd (KED) | 0.034 ppb             | 608 cps           | 4.8 %         |
| 115In (KED) | 87.772 %              | 534,937 cps       | 0.2 %         |
| 133Cs (KED) | 0.128 ppb             | 2,385 cps         | 7.6 %         |
| 138Ba (KED) | 6.538 ppb             | 175,848 cps       | 1.2 %         |
| 139La (KED) | 0.477 ppb             | 27,790 cps        | 1.3 %         |
| 140Ce (KED) | 1.005 ppb             | 81,782 cps        | 0.6 %         |
| 141Pr (KED) | 0.113 ppb             | 9,327 cps         | 3.3 %         |
| 142Nd (KED) | 0.611 ppb             | 20,774 cps        | 1.9 %         |
| 152Sm (KED) | 0.084 ppb             | 2,765 cps         | 2.2 %         |
| 153Eu (KED) | 0.016 ppb             | 1,054 cps         | 6.1 %         |
| 158Gd (KED) | 0.074 ppb             | 3,548 cps         | 1.3 %         |
| 159Tb (KED) | 86.386 %              | 3,408,805 cps     | 0.9 %         |
| 164Dy (KED) | 0.051 ppb             | 2,691 cps         | 4.3 %         |
| 166Er (KED) | 0.023 ppb             | 1,878 cps         | 1.6 %         |
| 169Tm (KED) | 0.003 ppb             | 691 cps           | 3.7 %         |
| 174Yb (KED) | 0.020 ppb             | 1,601 cps         | 4.1 %         |
| 175Lu (KED) | -0.083 ppb            | 17,513 cps        | 2.7 %         |
| 205Tl (KED) | 0.015 ppb             | 2,161 cps         | 1.4 %         |
| 208Pb (KED) | 1.236 ppb             | 141,122 cps       | 0.1 %         |
| 209Bi (KED) | 68.939 %              | 2,773,655 cps     | 1.7 %         |
| 232Th (KED) | 0.173 ppb             | 32,861 cps        | 1.2 %         |
| 238U (KED)  | 0.081 ppb             | 18,400 cps        | 3.2 %         |

## Sample Summary

Instrument ID: iCAP Q

Analysis index: 14

Analysis name: 029749jan

Analysis started at: 9/8/2021 4:20:30 PM

User name: WINDOWS-UPCI4ER\Administrator

| Category    | Concentration average | Concentration RSD |
|-------------|-----------------------|-------------------|
| 6Li (KED)   | 132.805 %             | 2.4 %             |
| 9Be (KED)   | 0.024 ppb             | 101.6 %           |
| 11B (KED)   | -3.822 ppb            | 9.3 %             |
| 24Mg (KED)  | 945.572 ppb           | 1.6 %             |
| 27Al (KED)  | 499.423 ppb           | 1.3 %             |
| 45Sc (KED)  | 126.038 %             | 1.7 %             |
| 51V (KED)   | 1.034 ppb             | 2.8 %             |
| 52Cr (KED)  | 3.337 ppb             | 2.4 %             |
| 55Mn (KED)  | 17.914 ppb            | 1.3 %             |
| 56Fe (KED)  | 680.960 ppb           | 1.4 %             |
| 58Ni (KED)  | 3.010 ppb             | 2.2 %             |
| 59Co (KED)  | 0.309 ppb             | 1.4 %             |
| 63Cu (KED)  | 6.676 ppb             | 0.9 %             |
| 64Zn (KED)  | 193.265 ppb           | 2.0 %             |
| 69Ga (KED)  | 1.940 ppb             | 4.6 %             |
| 75As (KED)  | 0.914 ppb             | 5.8 %             |
| 80Se (KED)  | 0.687 ppb             | 23.7 %            |
| 85Rb (KED)  | 2.045 ppb             | 2.2 %             |
| 88Sr (KED)  | 12.525 ppb            | 1.0 %             |
| 89Y (KED)   | 103.339 %             | 0.7 %             |
| 107Ag (KED) | 0.060 ppb             | 0.6 %             |
| 114Cd (KED) | 0.047 ppb             | 6.6 %             |
| 115In (KED) | 87.256 %              | 0.5 %             |
| 133Cs (KED) | 0.110 ppb             | 8.4 %             |
| 138Ba (KED) | 5.909 ppb             | 1.4 %             |
| 139La (KED) | 0.412 ppb             | 3.6 %             |
| 140Ce (KED) | 0.846 ppb             | 0.9 %             |
| 141Pr (KED) | 0.095 ppb             | 2.3 %             |
| 142Nd (KED) | 0.516 ppb             | 1.0 %             |
| 152Sm (KED) | 0.071 ppb             | 1.5 %             |
| 153Eu (KED) | 0.015 ppb             | 5.2 %             |
| 158Gd (KED) | 0.063 ppb             | 4.8 %             |
| 159Tb (KED) | 88.276 %              | 1.5 %             |
| 164Dy (KED) | 0.043 ppb             | 6.8 %             |
| 166Er (KED) | 0.021 ppb             | 7.5 %             |
| 169Tm (KED) | 0.003 ppb             | 15.6 %            |
| 174Yb (KED) | 0.017 ppb             | 5.9 %             |
| 175Lu (KED) | -0.086 ppb            | 8.0 %             |
| 205Tl (KED) | 0.014 ppb             | 4.3 %             |
| 208Pb (KED) | 0.798 ppb             | 3.8 %             |
| 209Bi (KED) | 71.058 %              | 1.8 %             |
| 232Th (KED) | 0.148 ppb             | 2.7 %             |
| 238U (KED)  | 0.067 ppb             | 1.6 %             |

| Category   | Concentration average | Intensity average | Intensity RSD |
|------------|-----------------------|-------------------|---------------|
| 6Li (KED)  | 132.805 %             | 2,866 cps         | 2.4 %         |
| 9Be (KED)  | 0.024 ppb             | 3 cps             | 100.0 %       |
| 11B (KED)  | -3.822 ppb            | 638 cps           | 3.2 %         |
| 24Mg (KED) | 945.572 ppb           | 423,524 cps       | 0.9 %         |
| 27Al (KED) | 499.423 ppb           | 45,283 cps        | 1.1 %         |

| Category    | Concentration average | Intensity average | Intensity RSD |
|-------------|-----------------------|-------------------|---------------|
| 45Sc (KED)  | 126.038 %             | 34,929 cps        | 1.7 %         |
| 51V (KED)   | 1.034 ppb             | 6,926 cps         | 1.7 %         |
| 52Cr (KED)  | 3.337 ppb             | 35,690 cps        | 0.8 %         |
| 55Mn (KED)  | 17.914 ppb            | 85,562 cps        | 0.5 %         |
| 56Fe (KED)  | 680.960 ppb           | 6,538,615 cps     | 1.1 %         |
| 58Ni (KED)  | 3.010 ppb             | 42,012 cps        | 1.1 %         |
| 59Co (KED)  | 0.309 ppb             | 6,925 cps         | 2.3 %         |
| 63Cu (KED)  | 6.676 ppb             | 94,414 cps        | 0.8 %         |
| 64Zn (KED)  | 193.265 ppb           | 658,923 cps       | 1.2 %         |
| 69Ga (KED)  | 1.940 ppb             | 7,797 cps         | 3.9 %         |
| 75As (KED)  | 0.914 ppb             | 886 cps           | 5.1 %         |
| 80Se (KED)  | 0.687 ppb             | 723 cps           | 6.8 %         |
| 85Rb (KED)  | 2.045 ppb             | 7,556 cps         | 2.0 %         |
| 88Sr (KED)  | 12.525 ppb            | 64,501 cps        | 0.9 %         |
| 89Y (KED)   | 103.339 %             | 300,924 cps       | 0.7 %         |
| 107Ag (KED) | 0.060 ppb             | 2,365 cps         | 1.1 %         |
| 114Cd (KED) | 0.047 ppb             | 776 cps           | 4.9 %         |
| 115In (KED) | 87.256 %              | 531,790 cps       | 0.5 %         |
| 133Cs (KED) | 0.110 ppb             | 2,041 cps         | 7.8 %         |
| 138Ba (KED) | 5.909 ppb             | 162,586 cps       | 1.6 %         |
| 139La (KED) | 0.412 ppb             | 24,511 cps        | 2.0 %         |
| 140Ce (KED) | 0.846 ppb             | 70,412 cps        | 1.3 %         |
| 141Pr (KED) | 0.095 ppb             | 8,020 cps         | 2.8 %         |
| 142Nd (KED) | 0.516 ppb             | 17,932 cps        | 1.5 %         |
| 152Sm (KED) | 0.071 ppb             | 2,394 cps         | 2.9 %         |
| 153Eu (KED) | 0.015 ppb             | 972 cps           | 6.2 %         |
| 158Gd (KED) | 0.063 ppb             | 3,109 cps         | 3.4 %         |
| 159Tb (KED) | 88.276 %              | 3,483,370 cps     | 1.5 %         |
| 164Dy (KED) | 0.043 ppb             | 2,331 cps         | 5.6 %         |
| 166Er (KED) | 0.021 ppb             | 1,785 cps         | 6.0 %         |
| 169Tm (KED) | 0.003 ppb             | 670 cps           | 15.4 %        |
| 174Yb (KED) | 0.017 ppb             | 1,417 cps         | 6.2 %         |
| 175Lu (KED) | -0.086 ppb            | 17,515 cps        | 3.4 %         |
| 205Tl (KED) | 0.014 ppb             | 1,956 cps         | 3.1 %         |
| 208Pb (KED) | 0.798 ppb             | 101,482 cps       | 1.2 %         |
| 209Bi (KED) | 71.058 %              | 2,858,925 cps     | 1.8 %         |
| 232Th (KED) | 0.148 ppb             | 29,125 cps        | 1.2 %         |
| 238U (KED)  | 0.067 ppb             | 15,759 cps        | 2.0 %         |

## Sample Summary

Instrument ID: iCAP Q

Analysis index: 15

Analysis name: 20086jian

Analysis started at: 9/8/2021 4:24:10 PM

User name: WINDOWS-UPCI4ER\Administrator

| Category    | Concentration average | Concentration RSD |
|-------------|-----------------------|-------------------|
| 6Li (KED)   | 133.217 %             | 4.7 %             |
| 9Be (KED)   | 0.031 ppb             | 41.4 %            |
| 11B (KED)   | 6.301 ppb             | 19.4 %            |
| 24Mg (KED)  | 918.169 ppb           | 3.4 %             |
| 27Al (KED)  | 1,215.359 ppb         | 1.2 %             |
| 45Sc (KED)  | 129.552 %             | 1.3 %             |
| 51V (KED)   | 2.220 ppb             | 1.5 %             |
| 52Cr (KED)  | 4.366 ppb             | 1.1 %             |
| 55Mn (KED)  | 25.950 ppb            | 1.2 %             |
| 56Fe (KED)  | 1,128.314 ppb         | 2.2 %             |
| 58Ni (KED)  | 4.822 ppb             | 0.1 %             |
| 59Co (KED)  | 0.483 ppb             | 3.3 %             |
| 63Cu (KED)  | 6.480 ppb             | 1.2 %             |
| 64Zn (KED)  | 192.007 ppb           | 1.1 %             |
| 69Ga (KED)  | 3.674 ppb             | 2.0 %             |
| 75As (KED)  | 1.145 ppb             | 3.8 %             |
| 80Se (KED)  | 0.892 ppb             | 29.5 %            |
| 85Rb (KED)  | 4.154 ppb             | 1.4 %             |
| 88Sr (KED)  | 14.260 ppb            | 1.2 %             |
| 89Y (KED)   | 104.072 %             | 0.6 %             |
| 107Ag (KED) | 0.087 ppb             | 4.9 %             |
| 114Cd (KED) | 0.049 ppb             | 11.9 %            |
| 115In (KED) | 87.571 %              | 2.1 %             |
| 133Cs (KED) | 0.238 ppb             | 0.6 %             |
| 138Ba (KED) | 11.640 ppb            | 4.3 %             |
| 139La (KED) | 0.894 ppb             | 3.7 %             |
| 140Ce (KED) | 1.909 ppb             | 5.8 %             |
| 141Pr (KED) | 0.208 ppb             | 1.3 %             |
| 142Nd (KED) | 1.141 ppb             | 1.8 %             |
| 152Sm (KED) | 0.154 ppb             | 3.6 %             |
| 153Eu (KED) | 0.031 ppb             | 6.5 %             |
| 158Gd (KED) | 0.140 ppb             | 6.7 %             |
| 159Tb (KED) | 85.881 %              | 3.3 %             |
| 164Dy (KED) | 0.097 ppb             | 3.9 %             |
| 166Er (KED) | 0.048 ppb             | 8.1 %             |
| 169Tm (KED) | 0.006 ppb             | 4.3 %             |
| 174Yb (KED) | 0.041 ppb             | 4.0 %             |
| 175Lu (KED) | -0.085 ppb            | 4.8 %             |
| 205Tl (KED) | 0.020 ppb             | 3.1 %             |
| 208Pb (KED) | 1.285 ppb             | 1.5 %             |
| 209Bi (KED) | 67.858 %              | 0.9 %             |
| 232Th (KED) | 0.318 ppb             | 0.5 %             |
| 238U (KED)  | 0.137 ppb             | 2.0 %             |

| Category   | Concentration average | Intensity average | Intensity RSD |
|------------|-----------------------|-------------------|---------------|
| 6Li (KED)  | 133.217 %             | 2,875 cps         | 4.7 %         |
| 9Be (KED)  | 0.031 ppb             | 4 cps             | 43.3 %        |
| 11B (KED)  | 6.301 ppb             | 1,298 cps         | 2.1 %         |
| 24Mg (KED) | 918.169 ppb           | 412,206 cps       | 1.6 %         |
| 27Al (KED) | 1,215.359 ppb         | 113,134 cps       | 1.7 %         |

| Category    | Concentration average | Intensity average | Intensity RSD |
|-------------|-----------------------|-------------------|---------------|
| 45Sc (KED)  | 129.552 %             | 35,903 cps        | 1.3 %         |
| 51V (KED)   | 2.220 ppb             | 15,274 cps        | 1.5 %         |
| 52Cr (KED)  | 4.366 ppb             | 47,966 cps        | 1.1 %         |
| 55Mn (KED)  | 25.950 ppb            | 127,338 cps       | 0.1 %         |
| 56Fe (KED)  | 1,128.314 ppb         | 11,131,740 cps    | 1.0 %         |
| 58Ni (KED)  | 4.822 ppb             | 67,977 cps        | 1.2 %         |
| 59Co (KED)  | 0.483 ppb             | 10,986 cps        | 1.9 %         |
| 63Cu (KED)  | 6.480 ppb             | 92,335 cps        | 0.7 %         |
| 64Zn (KED)  | 192.007 ppb           | 659,344 cps       | 1.0 %         |
| 69Ga (KED)  | 3.674 ppb             | 14,800 cps        | 1.9 %         |
| 75As (KED)  | 1.145 ppb             | 1,116 cps         | 3.4 %         |
| 80Se (KED)  | 0.892 ppb             | 783 cps           | 8.5 %         |
| 85Rb (KED)  | 4.154 ppb             | 15,391 cps        | 1.5 %         |
| 88Sr (KED)  | 14.260 ppb            | 73,933 cps        | 0.8 %         |
| 89Y (KED)   | 104.072 %             | 303,059 cps       | 0.6 %         |
| 107Ag (KED) | 0.087 ppb             | 3,413 cps         | 3.0 %         |
| 114Cd (KED) | 0.049 ppb             | 810 cps           | 10.1 %        |
| 115In (KED) | 87.571 %              | 533,715 cps       | 2.1 %         |
| 133Cs (KED) | 0.238 ppb             | 4,414 cps         | 2.3 %         |
| 138Ba (KED) | 11.640 ppb            | 309,754 cps       | 1.3 %         |
| 139La (KED) | 0.894 ppb             | 51,602 cps        | 1.1 %         |
| 140Ce (KED) | 1.909 ppb             | 153,954 cps       | 2.4 %         |
| 141Pr (KED) | 0.208 ppb             | 17,038 cps        | 2.2 %         |
| 142Nd (KED) | 1.141 ppb             | 38,448 cps        | 1.8 %         |
| 152Sm (KED) | 0.154 ppb             | 5,012 cps         | 4.0 %         |
| 153Eu (KED) | 0.031 ppb             | 1,959 cps         | 5.3 %         |
| 158Gd (KED) | 0.140 ppb             | 6,657 cps         | 3.3 %         |
| 159Tb (KED) | 85.881 %              | 3,388,876 cps     | 3.3 %         |
| 164Dy (KED) | 0.097 ppb             | 5,071 cps         | 2.2 %         |
| 166Er (KED) | 0.048 ppb             | 3,429 cps         | 4.5 %         |
| 169Tm (KED) | 0.006 ppb             | 1,380 cps         | 0.9 %         |
| 174Yb (KED) | 0.041 ppb             | 3,217 cps         | 1.2 %         |
| 175Lu (KED) | -0.085 ppb            | 17,157 cps        | 0.7 %         |
| 205Tl (KED) | 0.020 ppb             | 2,739 cps         | 3.1 %         |
| 208Pb (KED) | 1.285 ppb             | 143,660 cps       | 2.1 %         |
| 209Bi (KED) | 67.858 %              | 2,730,174 cps     | 0.9 %         |
| 232Th (KED) | 0.318 ppb             | 59,330 cps        | 1.4 %         |
| 238U (KED)  | 0.137 ppb             | 30,542 cps        | 2.6 %         |

## Sample Summary

Instrument ID: iCAP Q

Analysis index: 16

Analysis name: 018865jian

Analysis started at: 9/8/2021 4:27:50 PM

User name: WINDOWS-UPCI4ER\Administrator

| Category    | Concentration average | Concentration RSD |
|-------------|-----------------------|-------------------|
| 6Li (KED)   | 137.028 %             | 4.3 %             |
| 9Be (KED)   | 0.015 ppb             | 173.2 %           |
| 11B (KED)   | -4.682 ppb            | 6.3 %             |
| 24Mg (KED)  | 1,021.054 ppb         | 2.6 %             |
| 27Al (KED)  | 814.468 ppb           | 1.8 %             |
| 45Sc (KED)  | 131.148 %             | 1.3 %             |
| 51V (KED)   | 1.582 ppb             | 1.4 %             |
| 52Cr (KED)  | 2.709 ppb             | 1.8 %             |
| 55Mn (KED)  | 23.549 ppb            | 0.9 %             |
| 56Fe (KED)  | 855.865 ppb           | 2.5 %             |
| 58Ni (KED)  | 3.941 ppb             | 2.3 %             |
| 59Co (KED)  | 0.424 ppb             | 3.2 %             |
| 63Cu (KED)  | 9.008 ppb             | 2.1 %             |
| 64Zn (KED)  | 176.446 ppb           | 1.1 %             |
| 69Ga (KED)  | 2.784 ppb             | 2.7 %             |
| 75As (KED)  | 1.063 ppb             | 8.9 %             |
| 80Se (KED)  | 0.458 ppb             | 52.7 %            |
| 85Rb (KED)  | 1.947 ppb             | 0.4 %             |
| 88Sr (KED)  | 12.533 ppb            | 1.3 %             |
| 89Y (KED)   | 104.547 %             | 2.0 %             |
| 107Ag (KED) | 0.084 ppb             | 3.8 %             |
| 114Cd (KED) | 0.052 ppb             | 7.4 %             |
| 115In (KED) | 88.280 %              | 1.4 %             |
| 133Cs (KED) | 0.168 ppb             | 2.5 %             |
| 138Ba (KED) | 8.970 ppb             | 1.2 %             |
| 139La (KED) | 0.742 ppb             | 2.5 %             |
| 140Ce (KED) | 1.535 ppb             | 1.5 %             |
| 141Pr (KED) | 0.175 ppb             | 0.1 %             |
| 142Nd (KED) | 0.958 ppb             | 1.1 %             |
| 152Sm (KED) | 0.124 ppb             | 3.9 %             |
| 153Eu (KED) | 0.024 ppb             | 1.8 %             |
| 158Gd (KED) | 0.113 ppb             | 5.0 %             |
| 159Tb (KED) | 86.637 %              | 0.4 %             |
| 164Dy (KED) | 0.076 ppb             | 2.6 %             |
| 166Er (KED) | 0.033 ppb             | 4.7 %             |
| 169Tm (KED) | 0.004 ppb             | 4.8 %             |
| 174Yb (KED) | 0.027 ppb             | 3.3 %             |
| 175Lu (KED) | -0.089 ppb            | 2.3 %             |
| 205Tl (KED) | 0.019 ppb             | 5.1 %             |
| 208Pb (KED) | 1.112 ppb             | 2.9 %             |
| 209Bi (KED) | 69.286 %              | 1.6 %             |
| 232Th (KED) | 0.267 ppb             | 4.2 %             |
| 238U (KED)  | 0.107 ppb             | 3.4 %             |

| Category   | Concentration average | Intensity average | Intensity RSD |
|------------|-----------------------|-------------------|---------------|
| 6Li (KED)  | 137.028 %             | 2,957 cps         | 4.3 %         |
| 9Be (KED)  | 0.015 ppb             | 2 cps             | 173.2 %       |
| 11B (KED)  | -4.682 ppb            | 601 cps           | 7.6 %         |
| 24Mg (KED) | 1,021.054 ppb         | 471,597 cps       | 1.6 %         |
| 27Al (KED) | 814.468 ppb           | 76,781 cps        | 1.8 %         |

| Category    | Concentration average | Intensity average | Intensity RSD |
|-------------|-----------------------|-------------------|---------------|
| 45Sc (KED)  | 131.148 %             | 36,345 cps        | 1.3 %         |
| 51V (KED)   | 1.582 ppb             | 11,025 cps        | 2.2 %         |
| 52Cr (KED)  | 2.709 ppb             | 30,184 cps        | 0.6 %         |
| 55Mn (KED)  | 23.549 ppb            | 116,997 cps       | 0.6 %         |
| 56Fe (KED)  | 855.865 ppb           | 8,549,036 cps     | 1.4 %         |
| 58Ni (KED)  | 3.941 ppb             | 56,596 cps        | 0.9 %         |
| 59Co (KED)  | 0.424 ppb             | 9,786 cps         | 2.4 %         |
| 63Cu (KED)  | 9.008 ppb             | 128,299 cps       | 0.6 %         |
| 64Zn (KED)  | 176.446 ppb           | 608,751 cps       | 0.9 %         |
| 69Ga (KED)  | 2.784 ppb             | 11,284 cps        | 1.5 %         |
| 75As (KED)  | 1.063 ppb             | 1,040 cps         | 7.2 %         |
| 80Se (KED)  | 0.458 ppb             | 670 cps           | 11.7 %        |
| 85Rb (KED)  | 1.947 ppb             | 7,279 cps         | 1.6 %         |
| 88Sr (KED)  | 12.533 ppb            | 65,286 cps        | 1.0 %         |
| 89Y (KED)   | 104.547 %             | 304,441 cps       | 2.0 %         |
| 107Ag (KED) | 0.084 ppb             | 3,318 cps         | 3.1 %         |
| 114Cd (KED) | 0.052 ppb             | 847 cps           | 4.8 %         |
| 115In (KED) | 88.280 %              | 538,036 cps       | 1.4 %         |
| 133Cs (KED) | 0.168 ppb             | 3,155 cps         | 1.8 %         |
| 138Ba (KED) | 8.970 ppb             | 241,413 cps       | 1.2 %         |
| 139La (KED) | 0.742 ppb             | 43,277 cps        | 2.8 %         |
| 140Ce (KED) | 1.535 ppb             | 125,160 cps       | 1.9 %         |
| 141Pr (KED) | 0.175 ppb             | 14,455 cps        | 0.4 %         |
| 142Nd (KED) | 0.958 ppb             | 32,593 cps        | 0.7 %         |
| 152Sm (KED) | 0.124 ppb             | 4,065 cps         | 4.2 %         |
| 153Eu (KED) | 0.024 ppb             | 1,552 cps         | 1.4 %         |
| 158Gd (KED) | 0.113 ppb             | 5,420 cps         | 4.6 %         |
| 159Tb (KED) | 86.637 %              | 3,418,712 cps     | 0.4 %         |
| 164Dy (KED) | 0.076 ppb             | 4,032 cps         | 2.3 %         |
| 166Er (KED) | 0.033 ppb             | 2,500 cps         | 3.7 %         |
| 169Tm (KED) | 0.004 ppb             | 943 cps           | 4.3 %         |
| 174Yb (KED) | 0.027 ppb             | 2,162 cps         | 2.9 %         |
| 175Lu (KED) | -0.089 ppb            | 16,776 cps        | 1.8 %         |
| 205Tl (KED) | 0.019 ppb             | 2,631 cps         | 3.7 %         |
| 208Pb (KED) | 1.112 ppb             | 129,674 cps       | 1.4 %         |
| 209Bi (KED) | 69.286 %              | 2,787,625 cps     | 1.6 %         |
| 232Th (KED) | 0.267 ppb             | 51,014 cps        | 3.5 %         |
| 238U (KED)  | 0.107 ppb             | 24,225 cps        | 1.8 %         |

## Sample Summary

Instrument ID: iCAP Q

Analysis index: 17

Analysis name: 28726jian

Analysis started at: 9/8/2021 4:31:28 PM

User name: WINDOWS-UPCI4ER\Administrator

| Category    | Concentration average | Concentration RSD |
|-------------|-----------------------|-------------------|
| 6Li (KED)   | 134.247 %             | 1.5 %             |
| 9Be (KED)   | 0.008 ppb             | 173.2 %           |
| 11B (KED)   | -6.092 ppb            | 8.3 %             |
| 24Mg (KED)  | 537.012 ppb           | 3.2 %             |
| 27Al (KED)  | 517.166 ppb           | 1.8 %             |
| 45Sc (KED)  | 125.326 %             | 1.1 %             |
| 51V (KED)   | 0.988 ppb             | 2.3 %             |
| 52Cr (KED)  | 1.972 ppb             | 0.9 %             |
| 55Mn (KED)  | 15.353 ppb            | 0.2 %             |
| 56Fe (KED)  | 627.007 ppb           | 2.1 %             |
| 58Ni (KED)  | 2.838 ppb             | 1.5 %             |
| 59Co (KED)  | 0.268 ppb             | 1.4 %             |
| 63Cu (KED)  | 10.168 ppb            | 1.0 %             |
| 64Zn (KED)  | 166.232 ppb           | 0.5 %             |
| 69Ga (KED)  | 1.554 ppb             | 2.6 %             |
| 75As (KED)  | 0.519 ppb             | 11.0 %            |
| 80Se (KED)  | 0.251 ppb             | 30.7 %            |
| 85Rb (KED)  | 2.820 ppb             | 0.8 %             |
| 88Sr (KED)  | 8.955 ppb             | 1.5 %             |
| 89Y (KED)   | 102.516 %             | 0.3 %             |
| 107Ag (KED) | 0.051 ppb             | 4.1 %             |
| 114Cd (KED) | 0.055 ppb             | 11.8 %            |
| 115In (KED) | 88.985 %              | 0.9 %             |
| 133Cs (KED) | 0.092 ppb             | 2.5 %             |
| 138Ba (KED) | 4.749 ppb             | 1.0 %             |
| 139La (KED) | 0.389 ppb             | 3.1 %             |
| 140Ce (KED) | 0.789 ppb             | 0.8 %             |
| 141Pr (KED) | 0.088 ppb             | 1.2 %             |
| 142Nd (KED) | 0.470 ppb             | 3.2 %             |
| 152Sm (KED) | 0.065 ppb             | 2.8 %             |
| 153Eu (KED) | 0.012 ppb             | 3.4 %             |
| 158Gd (KED) | 0.059 ppb             | 3.7 %             |
| 159Tb (KED) | 88.464 %              | 0.3 %             |
| 164Dy (KED) | 0.041 ppb             | 7.7 %             |
| 166Er (KED) | 0.019 ppb             | 9.4 %             |
| 169Tm (KED) | 0.003 ppb             | 3.6 %             |
| 174Yb (KED) | 0.017 ppb             | 5.0 %             |
| 175Lu (KED) | -0.097 ppb            | 2.4 %             |
| 205Tl (KED) | 0.014 ppb             | 3.4 %             |
| 208Pb (KED) | 0.820 ppb             | 2.6 %             |
| 209Bi (KED) | 70.294 %              | 1.9 %             |
| 232Th (KED) | 0.139 ppb             | 2.3 %             |
| 238U (KED)  | 0.054 ppb             | 3.4 %             |

| Category   | Concentration average | Intensity average | Intensity RSD |
|------------|-----------------------|-------------------|---------------|
| 6Li (KED)  | 134.247 %             | 2,897 cps         | 1.5 %         |
| 9Be (KED)  | 0.008 ppb             | 1 cps             | 173.2 %       |
| 11B (KED)  | -6.092 ppb            | 496 cps           | 6.2 %         |
| 24Mg (KED) | 537.012 ppb           | 243,338 cps       | 1.8 %         |
| 27Al (KED) | 517.166 ppb           | 46,624 cps        | 1.3 %         |

| Category    | Concentration average | Intensity average | Intensity RSD |
|-------------|-----------------------|-------------------|---------------|
| 45Sc (KED)  | 125.326 %             | 34,732 cps        | 1.1 %         |
| 51V (KED)   | 0.988 ppb             | 6,580 cps         | 1.6 %         |
| 52Cr (KED)  | 1.972 ppb             | 21,042 cps        | 0.6 %         |
| 55Mn (KED)  | 15.353 ppb            | 72,946 cps        | 1.3 %         |
| 56Fe (KED)  | 627.007 ppb           | 5,986,857 cps     | 1.4 %         |
| 58Ni (KED)  | 2.838 ppb             | 39,501 cps        | 0.9 %         |
| 59Co (KED)  | 0.268 ppb             | 6,001 cps         | 0.3 %         |
| 63Cu (KED)  | 10.168 ppb            | 141,850 cps       | 0.9 %         |
| 64Zn (KED)  | 166.232 ppb           | 562,562 cps       | 0.2 %         |
| 69Ga (KED)  | 1.554 ppb             | 6,213 cps         | 2.3 %         |
| 75As (KED)  | 0.519 ppb             | 503 cps           | 10.6 %        |
| 80Se (KED)  | 0.251 ppb             | 601 cps           | 3.7 %         |
| 85Rb (KED)  | 2.820 ppb             | 10,311 cps        | 0.6 %         |
| 88Sr (KED)  | 8.955 ppb             | 45,792 cps        | 1.3 %         |
| 89Y (KED)   | 102.516 %             | 298,527 cps       | 0.3 %         |
| 107Ag (KED) | 0.051 ppb             | 2,072 cps         | 3.9 %         |
| 114Cd (KED) | 0.055 ppb             | 902 cps           | 10.1 %        |
| 115In (KED) | 88.985 %              | 542,328 cps       | 0.9 %         |
| 133Cs (KED) | 0.092 ppb             | 1,751 cps         | 2.2 %         |
| 138Ba (KED) | 4.749 ppb             | 131,285 cps       | 1.1 %         |
| 139La (KED) | 0.389 ppb             | 23,222 cps        | 3.3 %         |
| 140Ce (KED) | 0.789 ppb             | 65,904 cps        | 0.7 %         |
| 141Pr (KED) | 0.088 ppb             | 7,406 cps         | 0.9 %         |
| 142Nd (KED) | 0.470 ppb             | 16,375 cps        | 3.1 %         |
| 152Sm (KED) | 0.065 ppb             | 2,195 cps         | 2.6 %         |
| 153Eu (KED) | 0.012 ppb             | 819 cps           | 3.2 %         |
| 158Gd (KED) | 0.059 ppb             | 2,916 cps         | 3.5 %         |
| 159Tb (KED) | 88.464 %              | 3,490,807 cps     | 0.3 %         |
| 164Dy (KED) | 0.041 ppb             | 2,225 cps         | 7.9 %         |
| 166Er (KED) | 0.019 ppb             | 1,629 cps         | 7.0 %         |
| 169Tm (KED) | 0.003 ppb             | 591 cps           | 3.2 %         |
| 174Yb (KED) | 0.017 ppb             | 1,419 cps         | 4.7 %         |
| 175Lu (KED) | -0.097 ppb            | 16,223 cps        | 1.6 %         |
| 205Tl (KED) | 0.014 ppb             | 1,959 cps         | 3.7 %         |
| 208Pb (KED) | 0.820 ppb             | 102,572 cps       | 0.7 %         |
| 209Bi (KED) | 70.294 %              | 2,828,170 cps     | 1.9 %         |
| 232Th (KED) | 0.139 ppb             | 27,071 cps        | 1.7 %         |
| 238U (KED)  | 0.054 ppb             | 12,605 cps        | 2.5 %         |

## Sample Summary

Instrument ID: iCAP Q

Analysis index: 18

Analysis name: 28725jian

Analysis started at: 9/8/2021 4:34:53 PM

User name: WINDOWS-UPCI4ER\Administrator

| Category    | Concentration average | Concentration RSD |
|-------------|-----------------------|-------------------|
| 6Li (KED)   | 132.444 %             | 4.7 %             |
| 9Be (KED)   | 0.025 ppb             | 102.6 %           |
| 11B (KED)   | -3.886 ppb            | 28.3 %            |
| 24Mg (KED)  | 588.976 ppb           | 6.4 %             |
| 27Al (KED)  | 390.014 ppb           | 3.6 %             |
| 45Sc (KED)  | 126.532 %             | 3.8 %             |
| 51V (KED)   | 0.742 ppb             | 8.7 %             |
| 52Cr (KED)  | 1.667 ppb             | 2.5 %             |
| 55Mn (KED)  | 14.144 ppb            | 4.1 %             |
| 56Fe (KED)  | 398.215 ppb           | 1.6 %             |
| 58Ni (KED)  | 2.027 ppb             | 4.8 %             |
| 59Co (KED)  | 0.213 ppb             | 4.8 %             |
| 63Cu (KED)  | 8.720 ppb             | 0.6 %             |
| 64Zn (KED)  | 167.876 ppb           | 0.7 %             |
| 69Ga (KED)  | 1.457 ppb             | 3.2 %             |
| 75As (KED)  | 0.551 ppb             | 7.9 %             |
| 80Se (KED)  | 0.488 ppb             | 29.4 %            |
| 85Rb (KED)  | 1.956 ppb             | 2.2 %             |
| 88Sr (KED)  | 10.336 ppb            | 0.8 %             |
| 89Y (KED)   | 102.931 %             | 0.8 %             |
| 107Ag (KED) | 0.054 ppb             | 7.7 %             |
| 114Cd (KED) | 0.054 ppb             | 11.2 %            |
| 115In (KED) | 90.531 %              | 2.0 %             |
| 133Cs (KED) | 0.077 ppb             | 0.8 %             |
| 138Ba (KED) | 4.571 ppb             | 1.4 %             |
| 139La (KED) | 0.404 ppb             | 1.3 %             |
| 140Ce (KED) | 0.917 ppb             | 3.1 %             |
| 141Pr (KED) | 0.099 ppb             | 2.2 %             |
| 142Nd (KED) | 0.535 ppb             | 1.4 %             |
| 152Sm (KED) | 0.065 ppb             | 3.1 %             |
| 153Eu (KED) | 0.014 ppb             | 5.8 %             |
| 158Gd (KED) | 0.056 ppb             | 4.5 %             |
| 159Tb (KED) | 88.882 %              | 1.4 %             |
| 164Dy (KED) | 0.037 ppb             | 5.8 %             |
| 166Er (KED) | 0.016 ppb             | 3.4 %             |
| 169Tm (KED) | 0.002 ppb             | 9.8 %             |
| 174Yb (KED) | 0.014 ppb             | 6.7 %             |
| 175Lu (KED) | -0.093 ppb            | 4.5 %             |
| 205Tl (KED) | 0.012 ppb             | 3.1 %             |
| 208Pb (KED) | 0.694 ppb             | 3.4 %             |
| 209Bi (KED) | 71.714 %              | 2.5 %             |
| 232Th (KED) | 0.174 ppb             | 3.4 %             |
| 238U (KED)  | 0.044 ppb             | 2.7 %             |

| Category   | Concentration average | Intensity average | Intensity RSD |
|------------|-----------------------|-------------------|---------------|
| 6Li (KED)  | 132.444 %             | 2,858 cps         | 4.7 %         |
| 9Be (KED)  | 0.025 ppb             | 3 cps             | 100.0 %       |
| 11B (KED)  | -3.886 ppb            | 630 cps           | 6.9 %         |
| 24Mg (KED) | 588.976 ppb           | 262,811 cps       | 1.6 %         |
| 27Al (KED) | 390.014 ppb           | 35,495 cps        | 0.3 %         |

| Category    | Concentration average | Intensity average | Intensity RSD |
|-------------|-----------------------|-------------------|---------------|
| 45Sc (KED)  | 126.532 %             | 35,066 cps        | 3.8 %         |
| 51V (KED)   | 0.742 ppb             | 4,985 cps         | 5.0 %         |
| 52Cr (KED)  | 1.667 ppb             | 17,976 cps        | 1.6 %         |
| 55Mn (KED)  | 14.144 ppb            | 67,793 cps        | 1.0 %         |
| 56Fe (KED)  | 398.215 ppb           | 3,839,785 cps     | 2.2 %         |
| 58Ni (KED)  | 2.027 ppb             | 29,015 cps        | 1.2 %         |
| 59Co (KED)  | 0.213 ppb             | 4,862 cps         | 2.3 %         |
| 63Cu (KED)  | 8.720 ppb             | 122,365 cps       | 1.4 %         |
| 64Zn (KED)  | 167.876 ppb           | 570,429 cps       | 1.4 %         |
| 69Ga (KED)  | 1.457 ppb             | 5,854 cps         | 3.9 %         |
| 75As (KED)  | 0.551 ppb             | 536 cps           | 8.4 %         |
| 80Se (KED)  | 0.488 ppb             | 667 cps           | 5.0 %         |
| 85Rb (KED)  | 1.956 ppb             | 7,199 cps         | 2.2 %         |
| 88Sr (KED)  | 10.336 ppb            | 53,044 cps        | 1.5 %         |
| 89Y (KED)   | 102.931 %             | 299,736 cps       | 0.8 %         |
| 107Ag (KED) | 0.054 ppb             | 2,225 cps         | 5.7 %         |
| 114Cd (KED) | 0.054 ppb             | 908 cps           | 8.2 %         |
| 115In (KED) | 90.531 %              | 551,753 cps       | 2.0 %         |
| 133Cs (KED) | 0.077 ppb             | 1,500 cps         | 1.2 %         |
| 138Ba (KED) | 4.571 ppb             | 127,024 cps       | 1.8 %         |
| 139La (KED) | 0.404 ppb             | 24,238 cps        | 0.1 %         |
| 140Ce (KED) | 0.917 ppb             | 76,858 cps        | 1.7 %         |
| 141Pr (KED) | 0.099 ppb             | 8,423 cps         | 3.5 %         |
| 142Nd (KED) | 0.535 ppb             | 18,701 cps        | 0.3 %         |
| 152Sm (KED) | 0.065 ppb             | 2,197 cps         | 3.3 %         |
| 153Eu (KED) | 0.014 ppb             | 916 cps           | 5.3 %         |
| 158Gd (KED) | 0.056 ppb             | 2,767 cps         | 5.3 %         |
| 159Tb (KED) | 88.882 %              | 3,507,285 cps     | 1.4 %         |
| 164Dy (KED) | 0.037 ppb             | 2,044 cps         | 5.6 %         |
| 166Er (KED) | 0.016 ppb             | 1,439 cps         | 3.8 %         |
| 169Tm (KED) | 0.002 ppb             | 518 cps           | 10.4 %        |
| 174Yb (KED) | 0.014 ppb             | 1,196 cps         | 7.6 %         |
| 175Lu (KED) | -0.093 ppb            | 16,821 cps        | 1.7 %         |
| 205Tl (KED) | 0.012 ppb             | 1,785 cps         | 1.1 %         |
| 208Pb (KED) | 0.694 ppb             | 91,872 cps        | 0.9 %         |
| 209Bi (KED) | 71.714 %              | 2,885,321 cps     | 2.5 %         |
| 232Th (KED) | 0.174 ppb             | 34,458 cps        | 0.9 %         |
| 238U (KED)  | 0.044 ppb             | 10,427 cps        | 0.6 %         |

## Sample Summary

Instrument ID: iCAP Q

Analysis index: 19

Analysis name: 28725fu

Analysis started at: 9/8/2021 4:38:15 PM

User name: WINDOWS-UPCI4ER\Administrator

| Category    | Concentration average | Concentration RSD |
|-------------|-----------------------|-------------------|
| 6Li (KED)   | 132.960 %             | 4.7 %             |
| 9Be (KED)   | 0.016 ppb             | 86.7 %            |
| 11B (KED)   | -6.947 ppb            | 9.2 %             |
| 24Mg (KED)  | 525.765 ppb           | 4.2 %             |
| 27Al (KED)  | 398.176 ppb           | 1.8 %             |
| 45Sc (KED)  | 126.255 %             | 0.8 %             |
| 51V (KED)   | 0.767 ppb             | 2.2 %             |
| 52Cr (KED)  | 2.027 ppb             | 1.1 %             |
| 55Mn (KED)  | 14.365 ppb            | 0.3 %             |
| 56Fe (KED)  | 402.703 ppb           | 0.6 %             |
| 58Ni (KED)  | 2.287 ppb             | 0.6 %             |
| 59Co (KED)  | 0.220 ppb             | 0.7 %             |
| 63Cu (KED)  | 8.914 ppb             | 0.5 %             |
| 64Zn (KED)  | 174.569 ppb           | 1.0 %             |
| 69Ga (KED)  | 1.587 ppb             | 1.0 %             |
| 75As (KED)  | 0.602 ppb             | 1.8 %             |
| 80Se (KED)  | 0.604 ppb             | 3.5 %             |
| 85Rb (KED)  | 1.699 ppb             | 1.1 %             |
| 88Sr (KED)  | 10.476 ppb            | 1.6 %             |
| 89Y (KED)   | 101.273 %             | 1.6 %             |
| 107Ag (KED) | 0.056 ppb             | 10.3 %            |
| 114Cd (KED) | 0.048 ppb             | 6.1 %             |
| 115In (KED) | 88.603 %              | 1.1 %             |
| 133Cs (KED) | 0.079 ppb             | 6.1 %             |
| 138Ba (KED) | 5.017 ppb             | 2.9 %             |
| 139La (KED) | 0.311 ppb             | 1.9 %             |
| 140Ce (KED) | 0.656 ppb             | 2.6 %             |
| 141Pr (KED) | 0.073 ppb             | 4.1 %             |
| 142Nd (KED) | 0.398 ppb             | 2.8 %             |
| 152Sm (KED) | 0.052 ppb             | 7.1 %             |
| 153Eu (KED) | 0.012 ppb             | 7.1 %             |
| 158Gd (KED) | 0.048 ppb             | 2.6 %             |
| 159Tb (KED) | 88.191 %              | 2.4 %             |
| 164Dy (KED) | 0.033 ppb             | 3.8 %             |
| 166Er (KED) | 0.015 ppb             | 6.9 %             |
| 169Tm (KED) | 0.002 ppb             | 1.5 %             |
| 174Yb (KED) | 0.013 ppb             | 2.5 %             |
| 175Lu (KED) | -0.099 ppb            | 3.8 %             |
| 205Tl (KED) | 0.013 ppb             | 8.1 %             |
| 208Pb (KED) | 0.770 ppb             | 3.7 %             |
| 209Bi (KED) | 70.323 %              | 1.1 %             |
| 232Th (KED) | 0.113 ppb             | 5.3 %             |
| 238U (KED)  | 0.043 ppb             | 3.3 %             |

| Category   | Concentration average | Intensity average | Intensity RSD |
|------------|-----------------------|-------------------|---------------|
| 6Li (KED)  | 132.960 %             | 2,869 cps         | 4.7 %         |
| 9Be (KED)  | 0.016 ppb             | 2 cps             | 86.6 %        |
| 11B (KED)  | -6.947 ppb            | 434 cps           | 7.6 %         |
| 24Mg (KED) | 525.765 ppb           | 235,744 cps       | 1.3 %         |
| 27Al (KED) | 398.176 ppb           | 36,186 cps        | 1.0 %         |

| Category    | Concentration average | Intensity average | Intensity RSD |
|-------------|-----------------------|-------------------|---------------|
| 45Sc (KED)  | 126.255 %             | 34,989 cps        | 0.8 %         |
| 51V (KED)   | 0.767 ppb             | 5,152 cps         | 2.8 %         |
| 52Cr (KED)  | 2.027 ppb             | 21,786 cps        | 0.5 %         |
| 55Mn (KED)  | 14.365 ppb            | 68,768 cps        | 0.9 %         |
| 56Fe (KED)  | 402.703 ppb           | 3,876,112 cps     | 1.1 %         |
| 58Ni (KED)  | 2.287 ppb             | 32,457 cps        | 0.7 %         |
| 59Co (KED)  | 0.220 ppb             | 5,010 cps         | 0.4 %         |
| 63Cu (KED)  | 8.914 ppb             | 123,032 cps       | 1.5 %         |
| 64Zn (KED)  | 174.569 ppb           | 583,464 cps       | 0.7 %         |
| 69Ga (KED)  | 1.587 ppb             | 6,264 cps         | 0.9 %         |
| 75As (KED)  | 0.602 ppb             | 576 cps           | 3.4 %         |
| 80Se (KED)  | 0.604 ppb             | 687 cps           | 1.0 %         |
| 85Rb (KED)  | 1.699 ppb             | 6,160 cps         | 0.9 %         |
| 88Sr (KED)  | 10.476 ppb            | 52,901 cps        | 2.8 %         |
| 89Y (KED)   | 101.273 %             | 294,909 cps       | 1.6 %         |
| 107Ag (KED) | 0.056 ppb             | 2,259 cps         | 9.1 %         |
| 114Cd (KED) | 0.048 ppb             | 800 cps           | 5.0 %         |
| 115In (KED) | 88.603 %              | 540,003 cps       | 1.1 %         |
| 133Cs (KED) | 0.079 ppb             | 1,502 cps         | 4.8 %         |
| 138Ba (KED) | 5.017 ppb             | 138,120 cps       | 0.5 %         |
| 139La (KED) | 0.311 ppb             | 18,556 cps        | 0.8 %         |
| 140Ce (KED) | 0.656 ppb             | 54,641 cps        | 1.6 %         |
| 141Pr (KED) | 0.073 ppb             | 6,124 cps         | 2.3 %         |
| 142Nd (KED) | 0.398 ppb             | 13,850 cps        | 1.7 %         |
| 152Sm (KED) | 0.052 ppb             | 1,742 cps         | 4.6 %         |
| 153Eu (KED) | 0.012 ppb             | 786 cps           | 9.3 %         |
| 158Gd (KED) | 0.048 ppb             | 2,385 cps         | 1.0 %         |
| 159Tb (KED) | 88.191 %              | 3,480,022 cps     | 2.4 %         |
| 164Dy (KED) | 0.033 ppb             | 1,770 cps         | 1.3 %         |
| 166Er (KED) | 0.015 ppb             | 1,390 cps         | 3.0 %         |
| 169Tm (KED) | 0.002 ppb             | 480 cps           | 3.0 %         |
| 174Yb (KED) | 0.013 ppb             | 1,077 cps         | 2.6 %         |
| 175Lu (KED) | -0.099 ppb            | 15,919 cps        | 3.4 %         |
| 205Tl (KED) | 0.013 ppb             | 1,897 cps         | 7.2 %         |
| 208Pb (KED) | 0.770 ppb             | 97,742 cps        | 3.0 %         |
| 209Bi (KED) | 70.323 %              | 2,829,362 cps     | 1.1 %         |
| 232Th (KED) | 0.113 ppb             | 22,045 cps        | 5.2 %         |
| 238U (KED)  | 0.043 ppb             | 9,950 cps         | 2.3 %         |

## Sample Summary

Instrument ID: iCAP Q

Analysis index: 20

Analysis name: 28721jian

Analysis started at: 9/8/2021 4:41:43 PM

User name: WINDOWS-UPCI4ER\Administrator

| Category    | Concentration average | Concentration RSD |
|-------------|-----------------------|-------------------|
| 6Li (KED)   | 131.775 %             | 0.8 %             |
| 9Be (KED)   | 0.040 ppb             | 69.9 %            |
| 11B (KED)   | -8.915 ppb            | 3.7 %             |
| 24Mg (KED)  | 322.184 ppb           | 1.1 %             |
| 27Al (KED)  | 304.178 ppb           | 1.6 %             |
| 45Sc (KED)  | 121.820 %             | 1.4 %             |
| 51V (KED)   | 0.568 ppb             | 1.3 %             |
| 52Cr (KED)  | 1.703 ppb             | 0.2 %             |
| 55Mn (KED)  | 10.128 ppb            | 0.4 %             |
| 56Fe (KED)  | 438.654 ppb           | 1.6 %             |
| 58Ni (KED)  | 1.986 ppb             | 1.2 %             |
| 59Co (KED)  | 0.186 ppb             | 4.8 %             |
| 63Cu (KED)  | 10.055 ppb            | 1.5 %             |
| 64Zn (KED)  | 156.918 ppb           | 2.0 %             |
| 69Ga (KED)  | 1.036 ppb             | 6.6 %             |
| 75As (KED)  | 0.414 ppb             | 14.6 %            |
| 80Se (KED)  | 0.526 ppb             | 46.5 %            |
| 85Rb (KED)  | 1.336 ppb             | 4.2 %             |
| 88Sr (KED)  | 5.952 ppb             | 3.5 %             |
| 89Y (KED)   | 101.487 %             | 2.5 %             |
| 107Ag (KED) | 0.064 ppb             | 0.9 %             |
| 114Cd (KED) | 0.043 ppb             | 13.2 %            |
| 115In (KED) | 89.112 %              | 1.6 %             |
| 133Cs (KED) | 0.060 ppb             | 6.4 %             |
| 138Ba (KED) | 3.437 ppb             | 1.1 %             |
| 139La (KED) | 0.214 ppb             | 2.8 %             |
| 140Ce (KED) | 0.476 ppb             | 0.9 %             |
| 141Pr (KED) | 0.051 ppb             | 0.7 %             |
| 142Nd (KED) | 0.284 ppb             | 3.8 %             |
| 152Sm (KED) | 0.035 ppb             | 4.6 %             |
| 153Eu (KED) | 0.008 ppb             | 11.9 %            |
| 158Gd (KED) | 0.035 ppb             | 6.2 %             |
| 159Tb (KED) | 89.100 %              | 1.5 %             |
| 164Dy (KED) | 0.025 ppb             | 1.7 %             |
| 166Er (KED) | 0.009 ppb             | 11.2 %            |
| 169Tm (KED) | 0.001 ppb             | 13.6 %            |
| 174Yb (KED) | 0.010 ppb             | 8.9 %             |
| 175Lu (KED) | -0.101 ppb            | 3.7 %             |
| 205Tl (KED) | 0.010 ppb             | 9.7 %             |
| 208Pb (KED) | 0.514 ppb             | 1.7 %             |
| 209Bi (KED) | 73.350 %              | 1.4 %             |
| 232Th (KED) | 0.077 ppb             | 2.7 %             |
| 238U (KED)  | 0.036 ppb             | 0.8 %             |

| Category   | Concentration average | Intensity average | Intensity RSD |
|------------|-----------------------|-------------------|---------------|
| 6Li (KED)  | 131.775 %             | 2,844 cps         | 0.8 %         |
| 9Be (KED)  | 0.040 ppb             | 6 cps             | 69.3 %        |
| 11B (KED)  | -8.915 ppb            | 304 cps           | 7.1 %         |
| 24Mg (KED) | 322.184 ppb           | 143,536 cps       | 0.6 %         |
| 27Al (KED) | 304.178 ppb           | 26,696 cps        | 1.7 %         |

| Category    | Concentration average | Intensity average | Intensity RSD |
|-------------|-----------------------|-------------------|---------------|
| 45Sc (KED)  | 121.820 %             | 33,760 cps        | 1.4 %         |
| 51V (KED)   | 0.568 ppb             | 3,682 cps         | 1.0 %         |
| 52Cr (KED)  | 1.703 ppb             | 17,679 cps        | 1.6 %         |
| 55Mn (KED)  | 10.128 ppb            | 46,819 cps        | 1.1 %         |
| 56Fe (KED)  | 438.654 ppb           | 4,073,084 cps     | 1.6 %         |
| 58Ni (KED)  | 1.986 ppb             | 27,443 cps        | 1.5 %         |
| 59Co (KED)  | 0.186 ppb             | 4,118 cps         | 3.9 %         |
| 63Cu (KED)  | 10.055 ppb            | 138,842 cps       | 1.0 %         |
| 64Zn (KED)  | 156.918 ppb           | 525,660 cps       | 0.7 %         |
| 69Ga (KED)  | 1.036 ppb             | 4,122 cps         | 4.0 %         |
| 75As (KED)  | 0.414 ppb             | 400 cps           | 16.7 %        |
| 80Se (KED)  | 0.526 ppb             | 667 cps           | 7.3 %         |
| 85Rb (KED)  | 1.336 ppb             | 4,867 cps         | 2.1 %         |
| 88Sr (KED)  | 5.952 ppb             | 30,165 cps        | 1.5 %         |
| 89Y (KED)   | 101.487 %             | 295,533 cps       | 2.5 %         |
| 107Ag (KED) | 0.064 ppb             | 2,557 cps         | 1.9 %         |
| 114Cd (KED) | 0.043 ppb             | 732 cps           | 12.2 %        |
| 115In (KED) | 89.112 %              | 543,103 cps       | 1.6 %         |
| 133Cs (KED) | 0.060 ppb             | 1,167 cps         | 5.1 %         |
| 138Ba (KED) | 3.437 ppb             | 96,163 cps        | 0.9 %         |
| 139La (KED) | 0.214 ppb             | 12,908 cps        | 1.8 %         |
| 140Ce (KED) | 0.476 ppb             | 40,239 cps        | 1.1 %         |
| 141Pr (KED) | 0.051 ppb             | 4,365 cps         | 2.1 %         |
| 142Nd (KED) | 0.284 ppb             | 10,022 cps        | 2.3 %         |
| 152Sm (KED) | 0.035 ppb             | 1,195 cps         | 3.1 %         |
| 153Eu (KED) | 0.008 ppb             | 546 cps           | 10.3 %        |
| 158Gd (KED) | 0.035 ppb             | 1,765 cps         | 5.1 %         |
| 159Tb (KED) | 89.100 %              | 3,515,900 cps     | 1.5 %         |
| 164Dy (KED) | 0.025 ppb             | 1,403 cps         | 3.1 %         |
| 166Er (KED) | 0.009 ppb             | 1,019 cps         | 5.5 %         |
| 169Tm (KED) | 0.001 ppb             | 357 cps           | 13.8 %        |
| 174Yb (KED) | 0.010 ppb             | 826 cps           | 10.0 %        |
| 175Lu (KED) | -0.101 ppb            | 15,898 cps        | 1.6 %         |
| 205Tl (KED) | 0.010 ppb             | 1,478 cps         | 9.3 %         |
| 208Pb (KED) | 0.514 ppb             | 75,361 cps        | 0.5 %         |
| 209Bi (KED) | 73.350 %              | 2,951,113 cps     | 1.4 %         |
| 232Th (KED) | 0.077 ppb             | 15,847 cps        | 3.7 %         |
| 238U (KED)  | 0.036 ppb             | 8,706 cps         | 0.9 %         |

## Sample Summary

Instrument ID: iCAP Q

Analysis index: 21

Analysis name: 28726fu

Analysis started at: 9/8/2021 4:45:12 PM

User name: WINDOWS-UPCI4ER\Administrator

| Category    | Concentration average | Concentration RSD |
|-------------|-----------------------|-------------------|
| 6Li (KED)   | 125.595 %             | 3.8 %             |
| 9Be (KED)   | 0.009 ppb             | 173.2 %           |
| 11B (KED)   | -7.795 ppb            | 3.0 %             |
| 24Mg (KED)  | 559.165 ppb           | 4.9 %             |
| 27Al (KED)  | 445.673 ppb           | 2.0 %             |
| 45Sc (KED)  | 122.428 %             | 1.9 %             |
| 51V (KED)   | 0.867 ppb             | 2.1 %             |
| 52Cr (KED)  | 2.611 ppb             | 1.8 %             |
| 55Mn (KED)  | 13.981 ppb            | 2.3 %             |
| 56Fe (KED)  | 492.677 ppb           | 2.7 %             |
| 58Ni (KED)  | 2.447 ppb             | 2.3 %             |
| 59Co (KED)  | 0.241 ppb             | 4.4 %             |
| 63Cu (KED)  | 10.377 ppb            | 1.2 %             |
| 64Zn (KED)  | 156.848 ppb           | 1.0 %             |
| 69Ga (KED)  | 1.408 ppb             | 3.2 %             |
| 75As (KED)  | 0.539 ppb             | 13.5 %            |
| 80Se (KED)  | 0.471 ppb             | 11.9 %            |
| 85Rb (KED)  | 2.859 ppb             | 1.0 %             |
| 88Sr (KED)  | 9.301 ppb             | 1.0 %             |
| 89Y (KED)   | 102.042 %             | 0.4 %             |
| 107Ag (KED) | 0.041 ppb             | 5.4 %             |
| 114Cd (KED) | 0.071 ppb             | 4.8 %             |
| 115In (KED) | 88.871 %              | 0.6 %             |
| 133Cs (KED) | 0.092 ppb             | 3.5 %             |
| 138Ba (KED) | 4.683 ppb             | 1.2 %             |
| 139La (KED) | 0.348 ppb             | 1.6 %             |
| 140Ce (KED) | 0.730 ppb             | 1.8 %             |
| 141Pr (KED) | 0.082 ppb             | 2.5 %             |
| 142Nd (KED) | 0.437 ppb             | 2.4 %             |
| 152Sm (KED) | 0.060 ppb             | 5.0 %             |
| 153Eu (KED) | 0.013 ppb             | 6.3 %             |
| 158Gd (KED) | 0.052 ppb             | 3.2 %             |
| 159Tb (KED) | 87.675 %              | 1.5 %             |
| 164Dy (KED) | 0.037 ppb             | 4.3 %             |
| 166Er (KED) | 0.018 ppb             | 7.7 %             |
| 169Tm (KED) | 0.003 ppb             | 2.8 %             |
| 174Yb (KED) | 0.016 ppb             | 6.3 %             |
| 175Lu (KED) | -0.098 ppb            | 5.5 %             |
| 205Tl (KED) | 0.014 ppb             | 2.6 %             |
| 208Pb (KED) | 0.775 ppb             | 1.8 %             |
| 209Bi (KED) | 71.888 %              | 1.5 %             |
| 232Th (KED) | 0.119 ppb             | 1.8 %             |
| 238U (KED)  | 0.053 ppb             | 1.8 %             |

| Category   | Concentration average | Intensity average | Intensity RSD |
|------------|-----------------------|-------------------|---------------|
| 6Li (KED)  | 125.595 %             | 2,710 cps         | 3.8 %         |
| 9Be (KED)  | 0.009 ppb             | 1 cps             | 173.2 %       |
| 11B (KED)  | -7.795 ppb            | 359 cps           | 4.2 %         |
| 24Mg (KED) | 559.165 ppb           | 236,817 cps       | 1.3 %         |
| 27Al (KED) | 445.673 ppb           | 39,268 cps        | 3.0 %         |

| Category    | Concentration average | Intensity average | Intensity RSD |
|-------------|-----------------------|-------------------|---------------|
| 45Sc (KED)  | 122.428 %             | 33,928 cps        | 1.9 %         |
| 51V (KED)   | 0.867 ppb             | 5,642 cps         | 0.6 %         |
| 52Cr (KED)  | 2.611 ppb             | 27,174 cps        | 3.4 %         |
| 55Mn (KED)  | 13.981 ppb            | 64,885 cps        | 0.4 %         |
| 56Fe (KED)  | 492.677 ppb           | 4,595,841 cps     | 1.5 %         |
| 58Ni (KED)  | 2.447 ppb             | 33,533 cps        | 1.5 %         |
| 59Co (KED)  | 0.241 ppb             | 5,309 cps         | 2.4 %         |
| 63Cu (KED)  | 10.377 ppb            | 144,054 cps       | 0.8 %         |
| 64Zn (KED)  | 156.848 ppb           | 528,454 cps       | 0.5 %         |
| 69Ga (KED)  | 1.408 ppb             | 5,610 cps         | 3.1 %         |
| 75As (KED)  | 0.539 ppb             | 520 cps           | 13.4 %        |
| 80Se (KED)  | 0.471 ppb             | 657 cps           | 2.7 %         |
| 85Rb (KED)  | 2.859 ppb             | 10,403 cps        | 0.6 %         |
| 88Sr (KED)  | 9.301 ppb             | 47,336 cps        | 1.1 %         |
| 89Y (KED)   | 102.042 %             | 297,148 cps       | 0.4 %         |
| 107Ag (KED) | 0.041 ppb             | 1,665 cps         | 4.9 %         |
| 114Cd (KED) | 0.071 ppb             | 1,120 cps         | 3.9 %         |
| 115In (KED) | 88.871 %              | 541,637 cps       | 0.6 %         |
| 133Cs (KED) | 0.092 ppb             | 1,755 cps         | 3.3 %         |
| 138Ba (KED) | 4.683 ppb             | 128,315 cps       | 0.8 %         |
| 139La (KED) | 0.348 ppb             | 20,606 cps        | 1.3 %         |
| 140Ce (KED) | 0.730 ppb             | 60,415 cps        | 1.6 %         |
| 141Pr (KED) | 0.082 ppb             | 6,834 cps         | 1.1 %         |
| 142Nd (KED) | 0.437 ppb             | 15,105 cps        | 1.4 %         |
| 152Sm (KED) | 0.060 ppb             | 2,017 cps         | 4.3 %         |
| 153Eu (KED) | 0.013 ppb             | 848 cps           | 7.7 %         |
| 158Gd (KED) | 0.052 ppb             | 2,556 cps         | 4.2 %         |
| 159Tb (KED) | 87.675 %              | 3,459,659 cps     | 1.5 %         |
| 164Dy (KED) | 0.037 ppb             | 2,022 cps         | 5.4 %         |
| 166Er (KED) | 0.018 ppb             | 1,549 cps         | 5.0 %         |
| 169Tm (KED) | 0.003 ppb             | 578 cps           | 2.7 %         |
| 174Yb (KED) | 0.016 ppb             | 1,277 cps         | 6.8 %         |
| 175Lu (KED) | -0.098 ppb            | 16,007 cps        | 2.5 %         |
| 205Tl (KED) | 0.014 ppb             | 2,064 cps         | 3.9 %         |
| 208Pb (KED) | 0.775 ppb             | 100,423 cps       | 1.8 %         |
| 209Bi (KED) | 71.888 %              | 2,892,308 cps     | 1.5 %         |
| 232Th (KED) | 0.119 ppb             | 23,669 cps        | 0.3 %         |
| 238U (KED)  | 0.053 ppb             | 12,519 cps        | 3.1 %         |

## Sample Summary

Instrument ID: iCAP Q

Analysis index: 22

Analysis name: 28721fu

Analysis started at: 9/8/2021 4:48:34 PM

User name: WINDOWS-UPCI4ER\Administrator

| Category    | Concentration average | Concentration RSD |
|-------------|-----------------------|-------------------|
| 6Li (KED)   | 135.020 %             | 3.2 %             |
| 9Be (KED)   | 0.031 ppb             | 43.5 %            |
| 11B (KED)   | -8.816 ppb            | 4.0 %             |
| 24Mg (KED)  | 469.360 ppb           | 4.3 %             |
| 27Al (KED)  | 459.195 ppb           | 0.2 %             |
| 45Sc (KED)  | 123.010 %             | 0.7 %             |
| 51V (KED)   | 0.900 ppb             | 1.6 %             |
| 52Cr (KED)  | 2.386 ppb             | 1.8 %             |
| 55Mn (KED)  | 12.912 ppb            | 1.2 %             |
| 56Fe (KED)  | 520.461 ppb           | 1.2 %             |
| 58Ni (KED)  | 2.833 ppb             | 1.3 %             |
| 59Co (KED)  | 0.238 ppb             | 3.8 %             |
| 63Cu (KED)  | 8.943 ppb             | 2.5 %             |
| 64Zn (KED)  | 142.658 ppb           | 0.9 %             |
| 69Ga (KED)  | 1.473 ppb             | 1.3 %             |
| 75As (KED)  | 0.443 ppb             | 8.8 %             |
| 80Se (KED)  | 0.608 ppb             | 28.0 %            |
| 85Rb (KED)  | 1.738 ppb             | 2.3 %             |
| 88Sr (KED)  | 7.865 ppb             | 1.7 %             |
| 89Y (KED)   | 102.449 %             | 1.3 %             |
| 107Ag (KED) | 0.034 ppb             | 6.3 %             |
| 114Cd (KED) | 0.050 ppb             | 7.1 %             |
| 115In (KED) | 90.036 %              | 0.5 %             |
| 133Cs (KED) | 0.092 ppb             | 4.7 %             |
| 138Ba (KED) | 4.820 ppb             | 0.9 %             |
| 139La (KED) | 0.466 ppb             | 1.8 %             |
| 140Ce (KED) | 0.912 ppb             | 1.4 %             |
| 141Pr (KED) | 0.103 ppb             | 2.0 %             |
| 142Nd (KED) | 0.551 ppb             | 2.8 %             |
| 152Sm (KED) | 0.073 ppb             | 6.0 %             |
| 153Eu (KED) | 0.014 ppb             | 8.0 %             |
| 158Gd (KED) | 0.063 ppb             | 3.1 %             |
| 159Tb (KED) | 89.963 %              | 1.2 %             |
| 164Dy (KED) | 0.043 ppb             | 5.3 %             |
| 166Er (KED) | 0.018 ppb             | 1.2 %             |
| 169Tm (KED) | 0.003 ppb             | 3.9 %             |
| 174Yb (KED) | 0.017 ppb             | 3.7 %             |
| 175Lu (KED) | -0.099 ppb            | 1.5 %             |
| 205Tl (KED) | 0.012 ppb             | 3.0 %             |
| 208Pb (KED) | 0.676 ppb             | 1.4 %             |
| 209Bi (KED) | 73.991 %              | 1.1 %             |
| 232Th (KED) | 0.137 ppb             | 3.0 %             |
| 238U (KED)  | 0.050 ppb             | 0.7 %             |

| Category   | Concentration average | Intensity average | Intensity RSD |
|------------|-----------------------|-------------------|---------------|
| 6Li (KED)  | 135.020 %             | 2,914 cps         | 3.2 %         |
| 9Be (KED)  | 0.031 ppb             | 4 cps             | 43.3 %        |
| 11B (KED)  | -8.816 ppb            | 319 cps           | 10.3 %        |
| 24Mg (KED) | 469.360 ppb           | 213,842 cps       | 1.1 %         |
| 27Al (KED) | 459.195 ppb           | 40,647 cps        | 0.6 %         |

| Category    | Concentration average | Intensity average | Intensity RSD |
|-------------|-----------------------|-------------------|---------------|
| 45Sc (KED)  | 123.010 %             | 34,090 cps        | 0.7 %         |
| 51V (KED)   | 0.900 ppb             | 5,887 cps         | 1.9 %         |
| 52Cr (KED)  | 2.386 ppb             | 24,955 cps        | 2.5 %         |
| 55Mn (KED)  | 12.912 ppb            | 60,233 cps        | 0.8 %         |
| 56Fe (KED)  | 520.461 ppb           | 4,879,301 cps     | 1.5 %         |
| 58Ni (KED)  | 2.833 ppb             | 38,704 cps        | 1.2 %         |
| 59Co (KED)  | 0.238 ppb             | 5,263 cps         | 3.1 %         |
| 63Cu (KED)  | 8.943 ppb             | 124,840 cps       | 1.3 %         |
| 64Zn (KED)  | 142.658 ppb           | 482,721 cps       | 0.7 %         |
| 69Ga (KED)  | 1.473 ppb             | 5,889 cps         | 1.4 %         |
| 75As (KED)  | 0.443 ppb             | 430 cps           | 7.6 %         |
| 80Se (KED)  | 0.608 ppb             | 696 cps           | 5.8 %         |
| 85Rb (KED)  | 1.738 ppb             | 6,374 cps         | 2.7 %         |
| 88Sr (KED)  | 7.865 ppb             | 40,210 cps        | 1.3 %         |
| 89Y (KED)   | 102.449 %             | 298,334 cps       | 1.3 %         |
| 107Ag (KED) | 0.034 ppb             | 1,383 cps         | 6.4 %         |
| 114Cd (KED) | 0.050 ppb             | 846 cps           | 6.1 %         |
| 115In (KED) | 90.036 %              | 548,736 cps       | 0.5 %         |
| 133Cs (KED) | 0.092 ppb             | 1,770 cps         | 4.7 %         |
| 138Ba (KED) | 4.820 ppb             | 135,477 cps       | 0.4 %         |
| 139La (KED) | 0.466 ppb             | 28,279 cps        | 2.3 %         |
| 140Ce (KED) | 0.912 ppb             | 77,396 cps        | 0.6 %         |
| 141Pr (KED) | 0.103 ppb             | 8,843 cps         | 2.0 %         |
| 142Nd (KED) | 0.551 ppb             | 19,507 cps        | 2.0 %         |
| 152Sm (KED) | 0.073 ppb             | 2,494 cps         | 4.8 %         |
| 153Eu (KED) | 0.014 ppb             | 940 cps           | 8.7 %         |
| 158Gd (KED) | 0.063 ppb             | 3,165 cps         | 1.9 %         |
| 159Tb (KED) | 89.963 %              | 3,549,939 cps     | 1.2 %         |
| 164Dy (KED) | 0.043 ppb             | 2,389 cps         | 5.3 %         |
| 166Er (KED) | 0.018 ppb             | 1,575 cps         | 2.1 %         |
| 169Tm (KED) | 0.003 ppb             | 626 cps           | 3.9 %         |
| 174Yb (KED) | 0.017 ppb             | 1,405 cps         | 3.8 %         |
| 175Lu (KED) | -0.099 ppb            | 16,198 cps        | 0.2 %         |
| 205Tl (KED) | 0.012 ppb             | 1,822 cps         | 4.0 %         |
| 208Pb (KED) | 0.676 ppb             | 93,019 cps        | 0.4 %         |
| 209Bi (KED) | 73.991 %              | 2,976,935 cps     | 1.1 %         |
| 232Th (KED) | 0.137 ppb             | 28,151 cps        | 3.0 %         |
| 238U (KED)  | 0.050 ppb             | 12,190 cps        | 1.7 %         |

## Sample Summary

Instrument ID: iCAP Q

Analysis index: 23

Analysis name: 1168jian

Analysis started at: 9/8/2021 4:51:58 PM

User name: WINDOWS-UPCI4ER\Administrator

| Category    | Concentration average | Concentration RSD |
|-------------|-----------------------|-------------------|
| 6Li (KED)   | 129.612 %             | 3.2 %             |
| 9Be (KED)   | 0.040 ppb             | 32.6 %            |
| 11B (KED)   | 13.165 ppb            | 9.5 %             |
| 24Mg (KED)  | 773.548 ppb           | 4.6 %             |
| 27Al (KED)  | 931.506 ppb           | 0.7 %             |
| 45Sc (KED)  | 120.807 %             | 1.8 %             |
| 51V (KED)   | 1.759 ppb             | 2.8 %             |
| 52Cr (KED)  | 3.689 ppb             | 1.0 %             |
| 55Mn (KED)  | 23.291 ppb            | 1.8 %             |
| 56Fe (KED)  | 957.077 ppb           | 0.6 %             |
| 58Ni (KED)  | 4.542 ppb             | 1.9 %             |
| 59Co (KED)  | 0.446 ppb             | 2.8 %             |
| 63Cu (KED)  | 7.477 ppb             | 2.1 %             |
| 64Zn (KED)  | 192.865 ppb           | 1.5 %             |
| 69Ga (KED)  | 2.695 ppb             | 0.3 %             |
| 75As (KED)  | 1.003 ppb             | 8.2 %             |
| 80Se (KED)  | 0.738 ppb             | 24.0 %            |
| 85Rb (KED)  | 2.506 ppb             | 1.6 %             |
| 88Sr (KED)  | 12.537 ppb            | 1.6 %             |
| 89Y (KED)   | 102.231 %             | 0.6 %             |
| 107Ag (KED) | 0.094 ppb             | 1.6 %             |
| 114Cd (KED) | 0.060 ppb             | 5.1 %             |
| 115In (KED) | 88.208 %              | 0.3 %             |
| 133Cs (KED) | 0.191 ppb             | 0.5 %             |
| 138Ba (KED) | 8.907 ppb             | 2.7 %             |
| 139La (KED) | 0.747 ppb             | 0.8 %             |
| 140Ce (KED) | 1.508 ppb             | 1.8 %             |
| 141Pr (KED) | 0.174 ppb             | 3.6 %             |
| 142Nd (KED) | 0.936 ppb             | 5.0 %             |
| 152Sm (KED) | 0.126 ppb             | 5.4 %             |
| 153Eu (KED) | 0.025 ppb             | 3.0 %             |
| 158Gd (KED) | 0.110 ppb             | 5.0 %             |
| 159Tb (KED) | 89.209 %              | 3.0 %             |
| 164Dy (KED) | 0.078 ppb             | 2.1 %             |
| 166Er (KED) | 0.035 ppb             | 0.9 %             |
| 169Tm (KED) | 0.005 ppb             | 9.1 %             |
| 174Yb (KED) | 0.031 ppb             | 3.1 %             |
| 175Lu (KED) | -0.098 ppb            | 5.1 %             |
| 205Tl (KED) | 0.020 ppb             | 5.0 %             |
| 208Pb (KED) | 1.113 ppb             | 1.0 %             |
| 209Bi (KED) | 71.403 %              | 1.4 %             |
| 232Th (KED) | 0.281 ppb             | 2.4 %             |
| 238U (KED)  | 0.158 ppb             | 3.4 %             |

| Category   | Concentration average | Intensity average | Intensity RSD |
|------------|-----------------------|-------------------|---------------|
| 6Li (KED)  | 129.612 %             | 2,797 cps         | 3.2 %         |
| 9Be (KED)  | 0.040 ppb             | 6 cps             | 34.6 %        |
| 11B (KED)  | 13.165 ppb            | 1,699 cps         | 1.9 %         |
| 24Mg (KED) | 773.548 ppb           | 338,005 cps       | 1.8 %         |
| 27Al (KED) | 931.506 ppb           | 80,875 cps        | 1.2 %         |

| Category    | Concentration average | Intensity average | Intensity RSD |
|-------------|-----------------------|-------------------|---------------|
| 45Sc (KED)  | 120.807 %             | 33,479 cps        | 1.8 %         |
| 51V (KED)   | 1.759 ppb             | 11,283 cps        | 2.0 %         |
| 52Cr (KED)  | 3.689 ppb             | 37,814 cps        | 0.8 %         |
| 55Mn (KED)  | 23.291 ppb            | 106,611 cps       | 3.2 %         |
| 56Fe (KED)  | 957.077 ppb           | 8,807,172 cps     | 1.6 %         |
| 58Ni (KED)  | 4.542 ppb             | 59,807 cps        | 2.2 %         |
| 59Co (KED)  | 0.446 ppb             | 9,479 cps         | 1.1 %         |
| 63Cu (KED)  | 7.477 ppb             | 104,412 cps       | 1.5 %         |
| 64Zn (KED)  | 192.865 ppb           | 650,540 cps       | 1.0 %         |
| 69Ga (KED)  | 2.695 ppb             | 10,685 cps        | 0.6 %         |
| 75As (KED)  | 1.003 ppb             | 961 cps           | 8.7 %         |
| 80Se (KED)  | 0.738 ppb             | 729 cps           | 6.5 %         |
| 85Rb (KED)  | 2.506 ppb             | 9,146 cps         | 2.1 %         |
| 88Sr (KED)  | 12.537 ppb            | 63,864 cps        | 1.0 %         |
| 89Y (KED)   | 102.231 %             | 297,699 cps       | 0.6 %         |
| 107Ag (KED) | 0.094 ppb             | 3,743 cps         | 1.8 %         |
| 114Cd (KED) | 0.060 ppb             | 968 cps           | 4.4 %         |
| 115In (KED) | 88.208 %              | 537,595 cps       | 0.3 %         |
| 133Cs (KED) | 0.191 ppb             | 3,577 cps         | 0.3 %         |
| 138Ba (KED) | 8.907 ppb             | 246,712 cps       | 1.0 %         |
| 139La (KED) | 0.747 ppb             | 44,826 cps        | 2.3 %         |
| 140Ce (KED) | 1.508 ppb             | 126,549 cps       | 1.2 %         |
| 141Pr (KED) | 0.174 ppb             | 14,807 cps        | 1.6 %         |
| 142Nd (KED) | 0.936 ppb             | 32,750 cps        | 2.0 %         |
| 152Sm (KED) | 0.126 ppb             | 4,246 cps         | 3.2 %         |
| 153Eu (KED) | 0.025 ppb             | 1,695 cps         | 5.1 %         |
| 158Gd (KED) | 0.110 ppb             | 5,458 cps         | 5.0 %         |
| 159Tb (KED) | 89.209 %              | 3,520,217 cps     | 3.0 %         |
| 164Dy (KED) | 0.078 ppb             | 4,247 cps         | 4.8 %         |
| 166Er (KED) | 0.035 ppb             | 2,724 cps         | 2.7 %         |
| 169Tm (KED) | 0.005 ppb             | 1,106 cps         | 6.0 %         |
| 174Yb (KED) | 0.031 ppb             | 2,520 cps         | 2.3 %         |
| 175Lu (KED) | -0.098 ppb            | 16,248 cps        | 0.7 %         |
| 205Tl (KED) | 0.020 ppb             | 2,883 cps         | 6.4 %         |
| 208Pb (KED) | 1.113 ppb             | 133,803 cps       | 1.5 %         |
| 209Bi (KED) | 71.403 %              | 2,872,789 cps     | 1.4 %         |
| 232Th (KED) | 0.281 ppb             | 55,305 cps        | 1.1 %         |
| 238U (KED)  | 0.158 ppb             | 36,855 cps        | 2.6 %         |

## Sample Summary

Instrument ID: iCAP Q

Analysis index: 24

Analysis name: 2fu

Analysis started at: 9/8/2021 4:55:26 PM

User name: WINDOWS-UPCI4ER\Administrator

| Category    | Concentration average | Concentration RSD |
|-------------|-----------------------|-------------------|
| 6Li (KED)   | 122.556 %             | 0.8 %             |
| 9Be (KED)   | 0.026 ppb             | 100.0 %           |
| 11B (KED)   | 8.987 ppb             | 18.8 %            |
| 24Mg (KED)  | 990.738 ppb           | 0.8 %             |
| 27Al (KED)  | 1,229.840 ppb         | 3.0 %             |
| 45Sc (KED)  | 122.049 %             | 1.7 %             |
| 51V (KED)   | 2.386 ppb             | 2.3 %             |
| 52Cr (KED)  | 5.914 ppb             | 2.9 %             |
| 55Mn (KED)  | 32.580 ppb            | 0.6 %             |
| 56Fe (KED)  | 1,240.470 ppb         | 2.8 %             |
| 58Ni (KED)  | 5.479 ppb             | 1.6 %             |
| 59Co (KED)  | 0.541 ppb             | 1.4 %             |
| 63Cu (KED)  | 7.689 ppb             | 0.3 %             |
| 64Zn (KED)  | 180.387 ppb           | 0.4 %             |
| 69Ga (KED)  | 3.571 ppb             | 2.9 %             |
| 75As (KED)  | 1.009 ppb             | 4.5 %             |
| 80Se (KED)  | 0.972 ppb             | 16.5 %            |
| 85Rb (KED)  | 3.121 ppb             | 3.9 %             |
| 88Sr (KED)  | 14.380 ppb            | 2.7 %             |
| 89Y (KED)   | 101.522 %             | 0.4 %             |
| 107Ag (KED) | 0.051 ppb             | 1.9 %             |
| 114Cd (KED) | 0.038 ppb             | 14.4 %            |
| 115In (KED) | 89.462 %              | 2.4 %             |
| 133Cs (KED) | 0.249 ppb             | 4.4 %             |
| 138Ba (KED) | 11.905 ppb            | 0.3 %             |
| 139La (KED) | 0.968 ppb             | 1.6 %             |
| 140Ce (KED) | 2.001 ppb             | 3.3 %             |
| 141Pr (KED) | 0.226 ppb             | 1.1 %             |
| 142Nd (KED) | 1.218 ppb             | 1.9 %             |
| 152Sm (KED) | 0.160 ppb             | 4.6 %             |
| 153Eu (KED) | 0.033 ppb             | 1.7 %             |
| 158Gd (KED) | 0.148 ppb             | 3.6 %             |
| 159Tb (KED) | 88.413 %              | 2.1 %             |
| 164Dy (KED) | 0.104 ppb             | 2.6 %             |
| 166Er (KED) | 0.051 ppb             | 1.8 %             |
| 169Tm (KED) | 0.007 ppb             | 5.5 %             |
| 174Yb (KED) | 0.043 ppb             | 5.4 %             |
| 175Lu (KED) | -0.096 ppb            | 6.0 %             |
| 205Tl (KED) | 0.018 ppb             | 5.7 %             |
| 208Pb (KED) | 1.412 ppb             | 0.9 %             |
| 209Bi (KED) | 73.815 %              | 1.0 %             |
| 232Th (KED) | 0.361 ppb             | 1.6 %             |
| 238U (KED)  | 0.163 ppb             | 2.4 %             |

| Category   | Concentration average | Intensity average | Intensity RSD |
|------------|-----------------------|-------------------|---------------|
| 6Li (KED)  | 122.556 %             | 2,645 cps         | 0.8 %         |
| 9Be (KED)  | 0.026 ppb             | 3 cps             | 100.0 %       |
| 11B (KED)  | 8.987 ppb             | 1,358 cps         | 8.3 %         |
| 24Mg (KED) | 990.738 ppb           | 409,573 cps       | 0.4 %         |
| 27Al (KED) | 1,229.840 ppb         | 107,816 cps       | 1.4 %         |

| Category    | Concentration average | Intensity average | Intensity RSD |
|-------------|-----------------------|-------------------|---------------|
| 45Sc (KED)  | 122.049 %             | 33,824 cps        | 1.7 %         |
| 51V (KED)   | 2.386 ppb             | 15,463 cps        | 1.7 %         |
| 52Cr (KED)  | 5.914 ppb             | 61,144 cps        | 1.7 %         |
| 55Mn (KED)  | 32.580 ppb            | 150,595 cps       | 2.1 %         |
| 56Fe (KED)  | 1,240.470 ppb         | 11,528,437 cps    | 1.9 %         |
| 58Ni (KED)  | 5.479 ppb             | 72,483 cps        | 0.3 %         |
| 59Co (KED)  | 0.541 ppb             | 11,562 cps        | 0.9 %         |
| 63Cu (KED)  | 7.689 ppb             | 106,600 cps       | 0.5 %         |
| 64Zn (KED)  | 180.387 ppb           | 604,390 cps       | 0.7 %         |
| 69Ga (KED)  | 3.571 ppb             | 14,033 cps        | 2.5 %         |
| 75As (KED)  | 1.009 ppb             | 960 cps           | 4.9 %         |
| 80Se (KED)  | 0.972 ppb             | 786 cps           | 5.7 %         |
| 85Rb (KED)  | 3.121 ppb             | 11,295 cps        | 3.9 %         |
| 88Sr (KED)  | 14.380 ppb            | 72,722 cps        | 2.4 %         |
| 89Y (KED)   | 101.522 %             | 295,632 cps       | 0.4 %         |
| 107Ag (KED) | 0.051 ppb             | 2,046 cps         | 0.6 %         |
| 114Cd (KED) | 0.038 ppb             | 662 cps           | 9.5 %         |
| 115In (KED) | 89.462 %              | 545,239 cps       | 2.4 %         |
| 133Cs (KED) | 0.249 ppb             | 4,710 cps         | 3.3 %         |
| 138Ba (KED) | 11.905 ppb            | 326,395 cps       | 2.0 %         |
| 139La (KED) | 0.968 ppb             | 57,565 cps        | 2.3 %         |
| 140Ce (KED) | 2.001 ppb             | 166,211 cps       | 1.2 %         |
| 141Pr (KED) | 0.226 ppb             | 18,983 cps        | 1.1 %         |
| 142Nd (KED) | 1.218 ppb             | 42,243 cps        | 2.3 %         |
| 152Sm (KED) | 0.160 ppb             | 5,357 cps         | 2.5 %         |
| 153Eu (KED) | 0.033 ppb             | 2,145 cps         | 0.5 %         |
| 158Gd (KED) | 0.148 ppb             | 7,264 cps         | 5.6 %         |
| 159Tb (KED) | 88.413 %              | 3,488,780 cps     | 2.1 %         |
| 164Dy (KED) | 0.104 ppb             | 5,632 cps         | 1.2 %         |
| 166Er (KED) | 0.051 ppb             | 3,728 cps         | 2.5 %         |
| 169Tm (KED) | 0.007 ppb             | 1,537 cps         | 3.2 %         |
| 174Yb (KED) | 0.043 ppb             | 3,480 cps         | 4.2 %         |
| 175Lu (KED) | -0.096 ppb            | 16,360 cps        | 2.1 %         |
| 205Tl (KED) | 0.018 ppb             | 2,646 cps         | 4.7 %         |
| 208Pb (KED) | 1.412 ppb             | 169,469 cps       | 0.4 %         |
| 209Bi (KED) | 73.815 %              | 2,969,825 cps     | 1.0 %         |
| 232Th (KED) | 0.361 ppb             | 73,300 cps        | 1.5 %         |
| 238U (KED)  | 0.163 ppb             | 39,474 cps        | 2.3 %         |

## Sample Summary

Instrument ID: iCAP Q

Analysis index: 25

Analysis name: 9424jian

Analysis started at: 9/8/2021 4:58:53 PM

User name: WINDOWS-UPCI4ER\Administrator

| Category    | Concentration average | Concentration RSD |
|-------------|-----------------------|-------------------|
| 6Li (KED)   | 129.354 %             | 2.5 %             |
| 9Be (KED)   | 0.073 ppb             | 31.0 %            |
| 11B (KED)   | 20.893 ppb            | 7.3 %             |
| 24Mg (KED)  | 1,566.046 ppb         | 1.7 %             |
| 27Al (KED)  | 1,780.274 ppb         | 2.8 %             |
| 45Sc (KED)  | 124.490 %             | 1.5 %             |
| 51V (KED)   | 3.289 ppb             | 1.9 %             |
| 52Cr (KED)  | 5.688 ppb             | 1.7 %             |
| 55Mn (KED)  | 38.939 ppb            | 2.3 %             |
| 56Fe (KED)  | 1,666.147 ppb         | 1.9 %             |
| 58Ni (KED)  | 7.137 ppb             | 1.7 %             |
| 59Co (KED)  | 0.737 ppb             | 3.3 %             |
| 63Cu (KED)  | 6.665 ppb             | 0.9 %             |
| 64Zn (KED)  | 172.610 ppb           | 1.3 %             |
| 69Ga (KED)  | 6.433 ppb             | 2.2 %             |
| 75As (KED)  | 1.424 ppb             | 6.8 %             |
| 80Se (KED)  | 0.649 ppb             | 30.5 %            |
| 85Rb (KED)  | 4.708 ppb             | 2.0 %             |
| 88Sr (KED)  | 21.199 ppb            | 1.4 %             |
| 89Y (KED)   | 104.816 %             | 1.2 %             |
| 107Ag (KED) | 0.078 ppb             | 5.0 %             |
| 114Cd (KED) | 0.057 ppb             | 5.8 %             |
| 115In (KED) | 88.567 %              | 0.8 %             |
| 133Cs (KED) | 0.357 ppb             | 1.5 %             |
| 138Ba (KED) | 22.040 ppb            | 1.1 %             |
| 139La (KED) | 1.381 ppb             | 2.0 %             |
| 140Ce (KED) | 2.881 ppb             | 1.9 %             |
| 141Pr (KED) | 0.306 ppb             | 1.2 %             |
| 142Nd (KED) | 1.706 ppb             | 0.9 %             |
| 152Sm (KED) | 0.223 ppb             | 2.3 %             |
| 153Eu (KED) | 0.045 ppb             | 6.0 %             |
| 158Gd (KED) | 0.203 ppb             | 1.1 %             |
| 159Tb (KED) | 89.329 %              | 1.2 %             |
| 164Dy (KED) | 0.143 ppb             | 0.4 %             |
| 166Er (KED) | 0.068 ppb             | 4.1 %             |
| 169Tm (KED) | 0.009 ppb             | 3.1 %             |
| 174Yb (KED) | 0.058 ppb             | 3.5 %             |
| 175Lu (KED) | -0.092 ppb            | 2.3 %             |
| 205Tl (KED) | 0.026 ppb             | 2.8 %             |
| 208Pb (KED) | 1.788 ppb             | 2.8 %             |
| 209Bi (KED) | 71.567 %              | 1.1 %             |
| 232Th (KED) | 0.522 ppb             | 0.7 %             |
| 238U (KED)  | 0.230 ppb             | 3.3 %             |

| Category   | Concentration average | Intensity average | Intensity RSD |
|------------|-----------------------|-------------------|---------------|
| 6Li (KED)  | 129.354 %             | 2,791 cps         | 2.5 %         |
| 9Be (KED)  | 0.073 ppb             | 10 cps            | 33.3 %        |
| 11B (KED)  | 20.893 ppb            | 2,186 cps         | 3.5 %         |
| 24Mg (KED) | 1,566.046 ppb         | 682,876 cps       | 0.8 %         |
| 27Al (KED) | 1,780.274 ppb         | 159,162 cps       | 1.6 %         |

| Category    | Concentration average | Intensity average | Intensity RSD |
|-------------|-----------------------|-------------------|---------------|
| 45Sc (KED)  | 124.490 %             | 34,500 cps        | 1.5 %         |
| 51V (KED)   | 3.289 ppb             | 21,739 cps        | 1.9 %         |
| 52Cr (KED)  | 5.688 ppb             | 59,995 cps        | 1.7 %         |
| 55Mn (KED)  | 38.939 ppb            | 183,551 cps       | 2.6 %         |
| 56Fe (KED)  | 1,666.147 ppb         | 15,794,062 cps    | 1.4 %         |
| 58Ni (KED)  | 7.137 ppb             | 95,736 cps        | 1.6 %         |
| 59Co (KED)  | 0.737 ppb             | 15,984 cps        | 4.0 %         |
| 63Cu (KED)  | 6.665 ppb             | 95,608 cps        | 1.5 %         |
| 64Zn (KED)  | 172.610 ppb           | 597,133 cps       | 0.6 %         |
| 69Ga (KED)  | 6.433 ppb             | 26,039 cps        | 3.3 %         |
| 75As (KED)  | 1.424 ppb             | 1,396 cps         | 7.6 %         |
| 80Se (KED)  | 0.649 ppb             | 723 cps           | 8.2 %         |
| 85Rb (KED)  | 4.708 ppb             | 17,562 cps        | 3.1 %         |
| 88Sr (KED)  | 21.199 ppb            | 110,619 cps       | 1.7 %         |
| 89Y (KED)   | 104.816 %             | 305,226 cps       | 1.2 %         |
| 107Ag (KED) | 0.078 ppb             | 3,126 cps         | 4.3 %         |
| 114Cd (KED) | 0.057 ppb             | 930 cps           | 4.1 %         |
| 115In (KED) | 88.567 %              | 539,781 cps       | 0.8 %         |
| 133Cs (KED) | 0.357 ppb             | 6,668 cps         | 2.0 %         |
| 138Ba (KED) | 22.040 ppb            | 609,072 cps       | 0.5 %         |
| 139La (KED) | 1.381 ppb             | 82,897 cps        | 2.7 %         |
| 140Ce (KED) | 2.881 ppb             | 241,747 cps       | 1.6 %         |
| 141Pr (KED) | 0.306 ppb             | 26,023 cps        | 0.2 %         |
| 142Nd (KED) | 1.706 ppb             | 59,757 cps        | 1.9 %         |
| 152Sm (KED) | 0.223 ppb             | 7,532 cps         | 1.9 %         |
| 153Eu (KED) | 0.045 ppb             | 3,009 cps         | 5.2 %         |
| 158Gd (KED) | 0.203 ppb             | 10,046 cps        | 0.2 %         |
| 159Tb (KED) | 89.329 %              | 3,524,934 cps     | 1.2 %         |
| 164Dy (KED) | 0.143 ppb             | 7,787 cps         | 1.6 %         |
| 166Er (KED) | 0.068 ppb             | 4,904 cps         | 2.6 %         |
| 169Tm (KED) | 0.009 ppb             | 2,074 cps         | 3.5 %         |
| 174Yb (KED) | 0.058 ppb             | 4,741 cps         | 2.3 %         |
| 175Lu (KED) | -0.092 ppb            | 16,936 cps        | 2.7 %         |
| 205Tl (KED) | 0.026 ppb             | 3,745 cps         | 2.0 %         |
| 208Pb (KED) | 1.788 ppb             | 202,213 cps       | 1.4 %         |
| 209Bi (KED) | 71.567 %              | 2,879,412 cps     | 1.1 %         |
| 232Th (KED) | 0.522 ppb             | 102,545 cps       | 1.7 %         |
| 238U (KED)  | 0.230 ppb             | 53,832 cps        | 2.3 %         |
