# Supplementary material for: Geographic and breed-specific traceability of cashmere via mineral element profiling in Inner Mongolia (Ordos, Chifeng, and Alxa League)
Source: Royal Society of Chemistry journal article supplement (doi:10.1039/d5ra08122j), 2026-01-01
Supplement: d5ra08122j1.zip [file 20210923-e qi wei le qi tu (1-5)+e qi shai su mu (6-24).pdf › ԭʼ޿/20210923-e qi wei le qi tu (1-5)+e qi shai su mu (6-24).pdf]

## Instrument Summary:

Instrument ID: iCAP Q  
Serial Number: Undefined

## Labbook Summary:

Path and filename: \_Application Data\Workspace\LabBooks\wlw\20210923-1.imexp  
Labbook created by: Administrator  
Based on template:  
Hardware configuration: iCAPQ1  
Labbook type: eQuant  
Qtegra version (last saved): 2.7.2425.154  
Labbook started: 9/23/2021 3:38:52 PM  
Labbook finished: 9/23/2021 5:17:02 PM



## Calibration Curves:

9Be (KED)

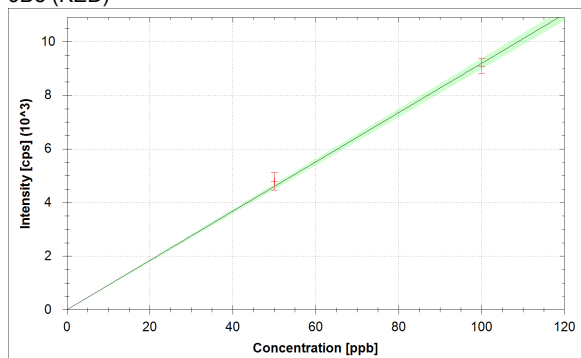

$$f(x) = 91.8761 \cdot x$$

$$R^2 = 0.9992$$

$$\text{BEC} = 0.000 \text{ ppb}$$

$$\text{LoD} = 0.0000 \text{ ppb}$$

11B (KED)

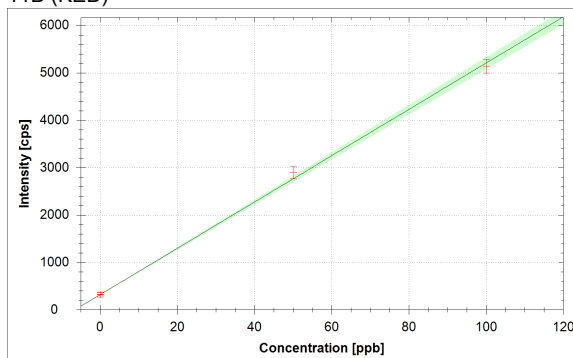

$$f(x) = 48.8658 \cdot x + 319.4717$$

$$R^2 = 0.9987$$

$$\text{BEC} = 6.538 \text{ ppb}$$

$$\text{LoD} = 2.0604 \text{ ppb}$$

24Mg (KED)

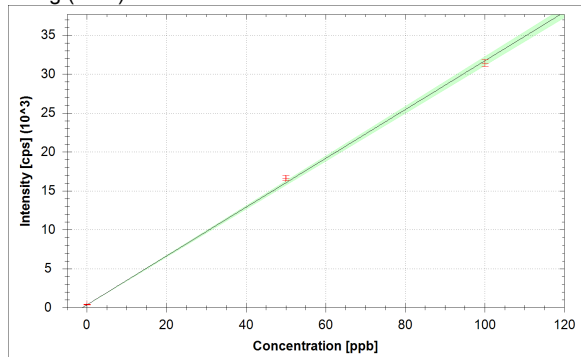

$$f(x) = 313.3845 \cdot x + 352.8878$$

$$R^2 = 0.9993$$

$$\text{BEC} = 1.126 \text{ ppb}$$

$$\text{LoD} = 0.1214 \text{ ppb}$$

27Al (KED)

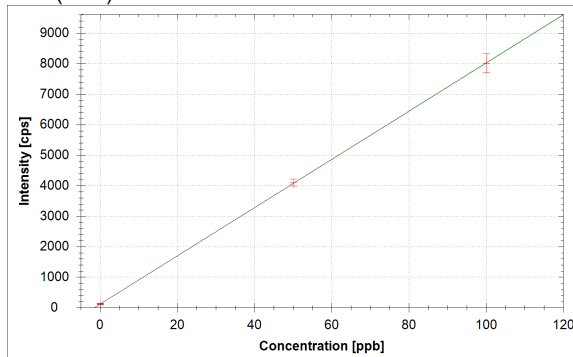

$$f(x) = 79.0834 \cdot x + 116.4351$$

$$R^2 = 1.0000$$

$$\text{BEC} = 1.472 \text{ ppb}$$

$$\text{LoD} = 0.0747 \text{ ppb}$$

51V (KED)

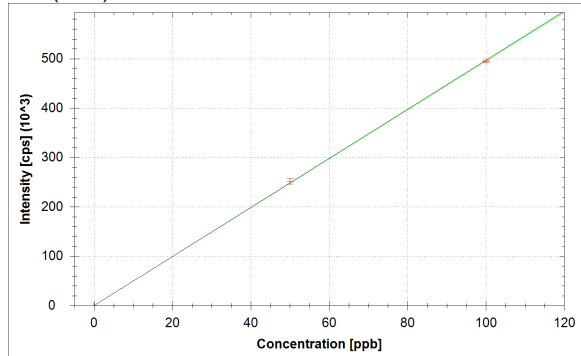

$$f(x) = 4962.9796 \cdot x + 6.5333$$

$$R^2 = 0.9999$$

$$\text{BEC} = 0.001 \text{ ppb}$$

$$\text{LoD} = 0.0061 \text{ ppb}$$

52Cr (KED)

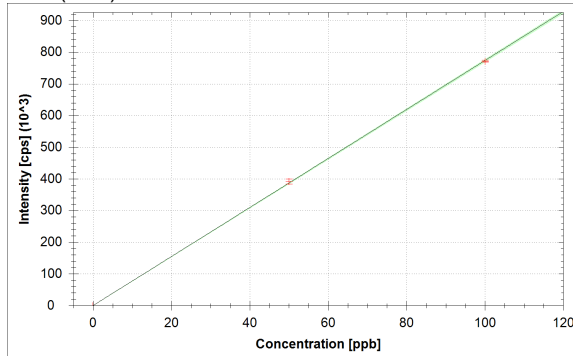

$$f(x) = 7736.5397 \cdot x + 115.3606$$

$$R^2 = 0.9999$$

$$\text{BEC} = 0.015 \text{ ppb}$$

$$\text{LoD} = 0.0075 \text{ ppb}$$





**<sup>114</sup>Cd (KED)**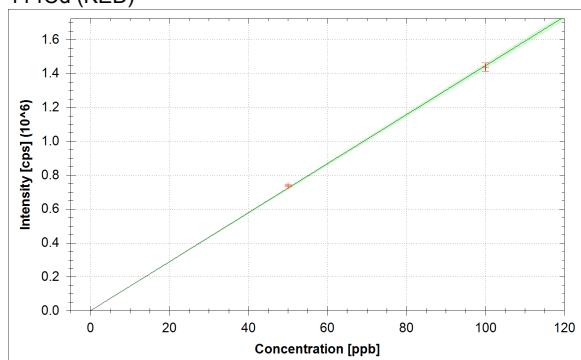

$$f(x) = 14453.9274 \cdot x + 101.7178$$

$$R^2 = 0.9998$$

$$\text{BEC} = 0.007 \text{ ppb}$$

$$\text{LoD} = 0.0012 \text{ ppb}$$

**<sup>133</sup>Cs (KED)**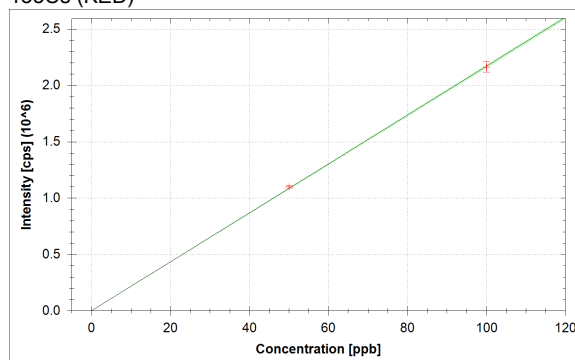

$$f(x) = 21694.3309 \cdot x + 59.4764$$

$$R^2 = 0.9999$$

$$\text{BEC} = 0.003 \text{ ppb}$$

$$\text{LoD} = 0.0012 \text{ ppb}$$

**<sup>138</sup>Ba (KED)**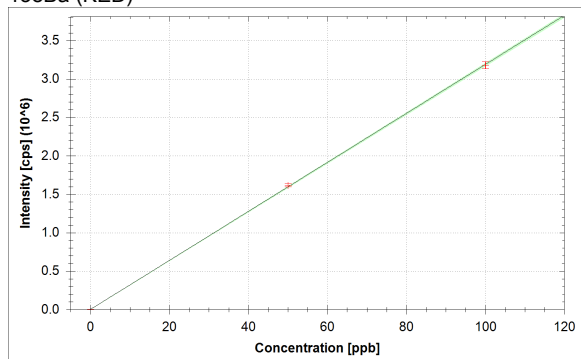

$$f(x) = 31866.9289 \cdot x + 2415.6309$$

$$R^2 = 0.9999$$

$$\text{BEC} = 0.076 \text{ ppb}$$

$$\text{LoD} = 0.0151 \text{ ppb}$$

**<sup>139</sup>La (KED)**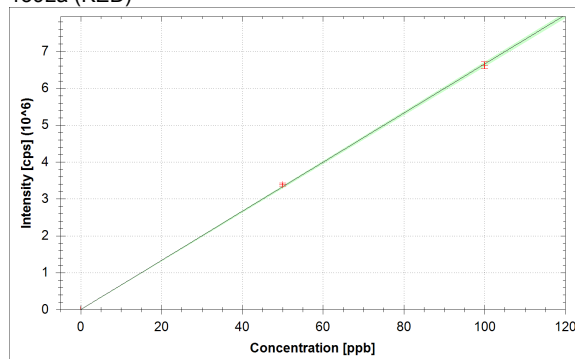

$$f(x) = 66538.7240 \cdot x + 147.9651$$

$$R^2 = 0.9998$$

$$\text{BEC} = 0.002 \text{ ppb}$$

$$\text{LoD} = 0.0003 \text{ ppb}$$

**<sup>140</sup>Ce (KED)**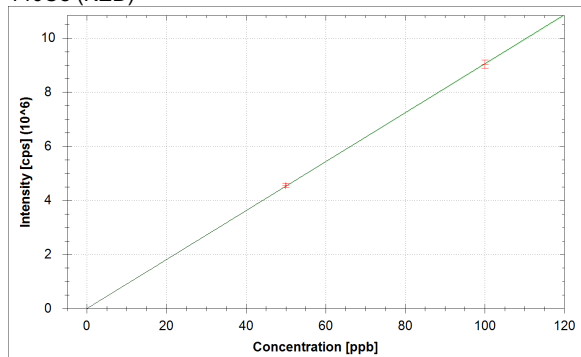

$$f(x) = 90464.8830 \cdot x + 442.6508$$

$$R^2 = 1.0000$$

$$\text{BEC} = 0.005 \text{ ppb}$$

$$\text{LoD} = 0.0014 \text{ ppb}$$

**<sup>141</sup>Pr (KED)**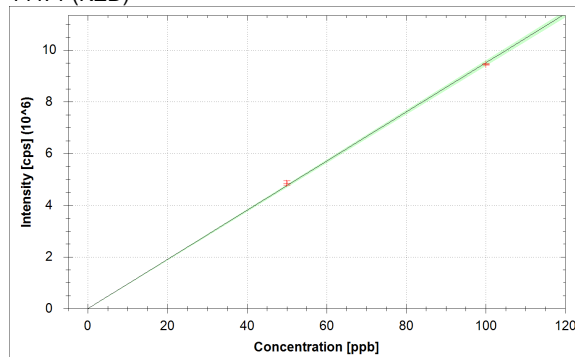

$$f(x) = 95080.1055 \cdot x + 59.7900$$

$$R^2 = 0.9998$$

$$\text{BEC} = 0.001 \text{ ppb}$$

$$\text{LoD} = 0.0002 \text{ ppb}$$

**<sup>142</sup>Nd (KED)**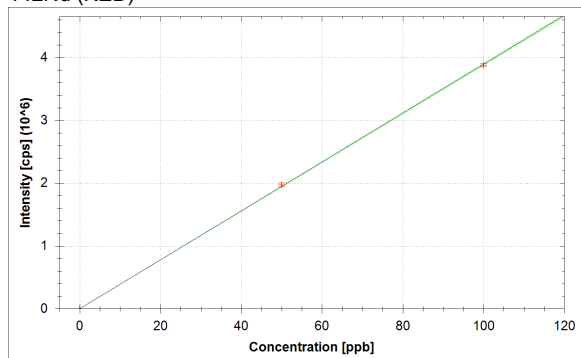

$$f(x) = 38910.5020 \cdot x + 111.0644$$

$$R^2 = 0.9999$$

$$\text{BEC} = 0.003 \text{ ppb}$$

$$\text{LoD} = 0.0025 \text{ ppb}$$

**<sup>152</sup>Sm (KED)**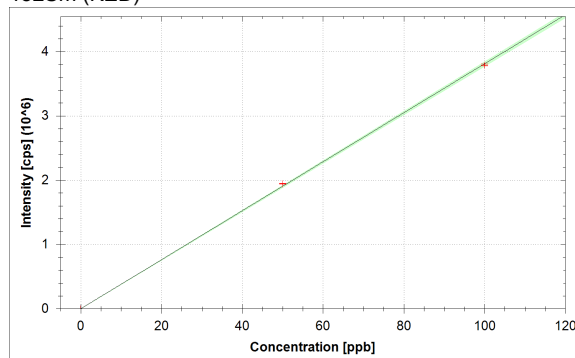

$$f(x) = 38081.9168 \cdot x + 15.2306$$

$$R^2 = 0.9998$$

$$\text{BEC} = 0.000 \text{ ppb}$$

$$\text{LoD} = 0.0006 \text{ ppb}$$

**<sup>153</sup>Eu (KED)**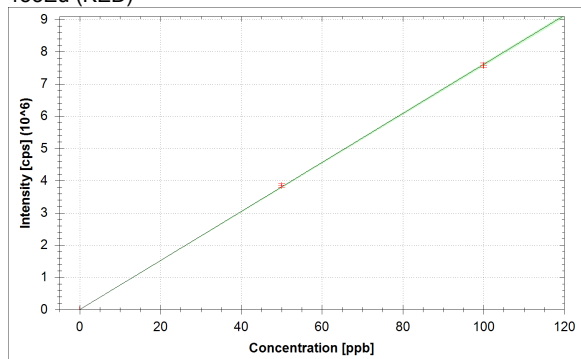

$$f(x) = 76042.0491 \cdot x + 9.7721$$

$$R^2 = 0.9999$$

$$\text{BEC} = 0.000 \text{ ppb}$$

$$\text{LoD} = 0.0004 \text{ ppb}$$

**<sup>158</sup>Gd (KED)**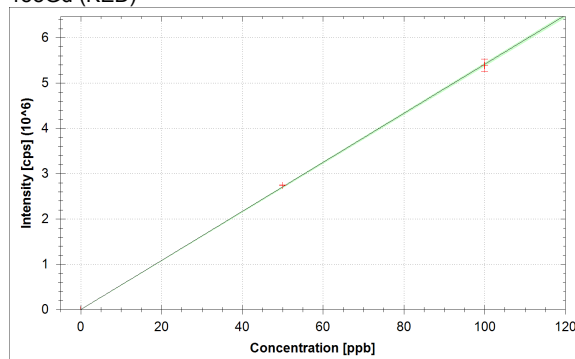

$$f(x) = 54107.6183 \cdot x + 17.4663$$

$$R^2 = 0.9999$$

$$\text{BEC} = 0.000 \text{ ppb}$$

$$\text{LoD} = 0.0004 \text{ ppb}$$

**<sup>164</sup>Dy (KED)**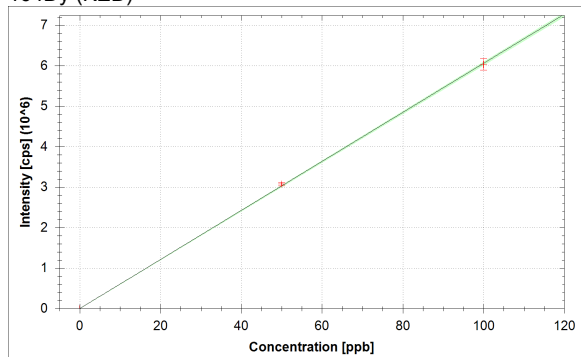

$$f(x) = 60593.5862 \cdot x + 36.8966$$

$$R^2 = 0.9999$$

$$\text{BEC} = 0.001 \text{ ppb}$$

$$\text{LoD} = 0.0002 \text{ ppb}$$

**<sup>166</sup>Er (KED)**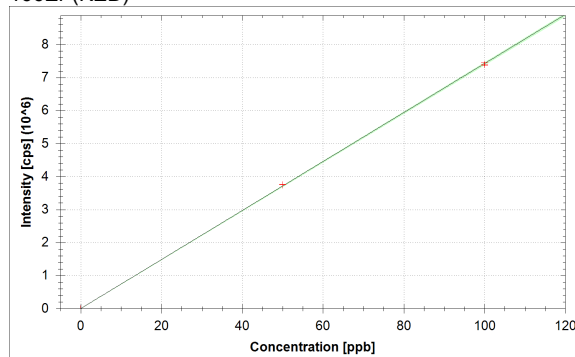

$$f(x) = 74229.0669 \cdot x + 738.4141$$

$$R^2 = 0.9999$$

$$\text{BEC} = 0.010 \text{ ppb}$$

$$\text{LoD} = 0.0019 \text{ ppb}$$

169Tm (KED)

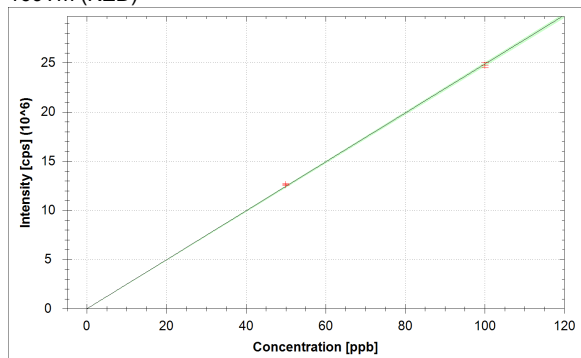

$$f(x) = 248681.1607 \cdot x + 28.2814$$

$$R^2 = 0.9999$$

$$\text{BEC} = 0.000 \text{ ppb}$$

$$\text{LoD} = 0.0001 \text{ ppb}$$

174Yb (KED)

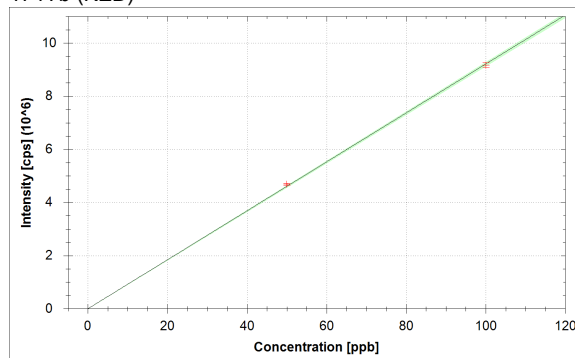

$$f(x) = 92089.9872 \cdot x + 46.6850$$

$$R^2 = 0.9999$$

$$\text{BEC} = 0.001 \text{ ppb}$$

$$\text{LoD} = 0.0003 \text{ ppb}$$

175Lu (KED)

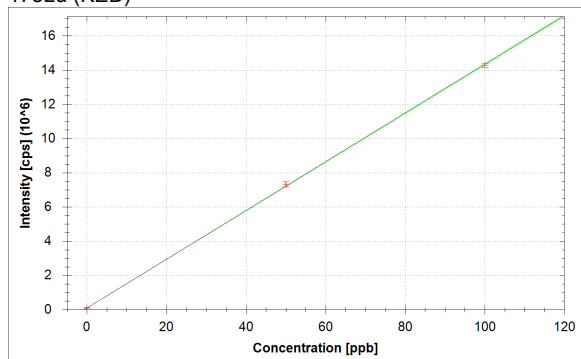

$$f(x) = 142460.9997 \cdot x + 88137.0518$$

$$R^2 = 0.9999$$

$$\text{BEC} = 0.619 \text{ ppb}$$

$$\text{LoD} = 0.0416 \text{ ppb}$$

205Tl (KED)

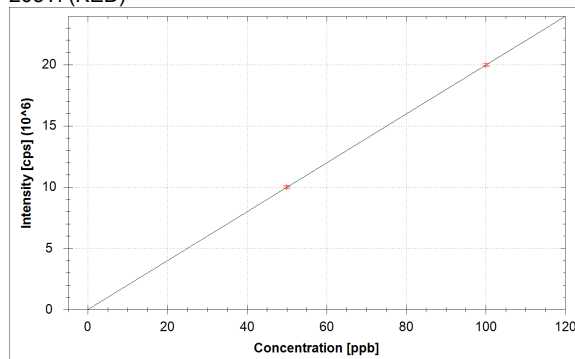

$$f(x) = 199576.6073 \cdot x + 76.1804$$

$$R^2 = 1.0000$$

$$\text{BEC} = 0.000 \text{ ppb}$$

$$\text{LoD} = 0.0005 \text{ ppb}$$

208Pb (KED)

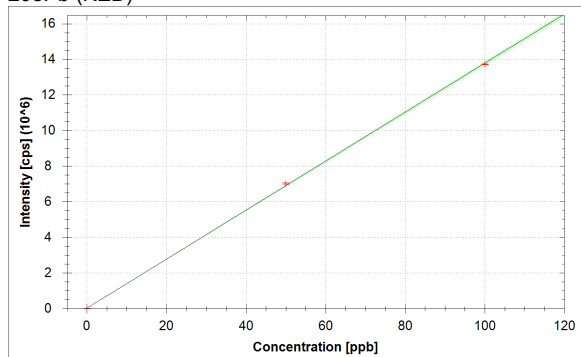

$$f(x) = 137593.6636 \cdot x + 22341.2353$$

$$R^2 = 0.9999$$

$$\text{BEC} = 0.162 \text{ ppb}$$

$$\text{LoD} = 0.0058 \text{ ppb}$$

232Th (KED)

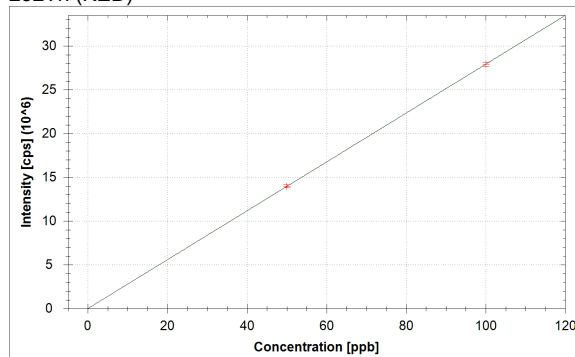

$$f(x) = 279214.7037 \cdot x + 299.1399$$

$$R^2 = 1.0000$$

$$\text{BEC} = 0.001 \text{ ppb}$$

$$\text{LoD} = 0.0006 \text{ ppb}$$

<sup>238</sup>U (KED)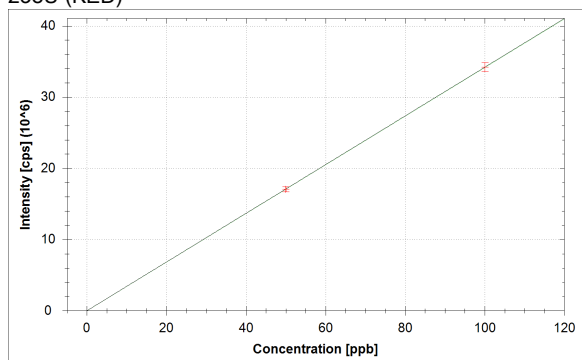

$$f(x) = 341860.5544 \cdot x + 160.9892$$

$$R^2 = 1.0000$$

$$\text{BEC} = 0.000 \text{ ppb}$$

$$\text{LoD} = 0.0002 \text{ ppb}$$

**Standards:**

Analysis Index: 3  
 Analysis Name: 0+20  
 Analysis Type: STD  
 Analysis Started at: 9/23/2021 3:45:59 PM  
 Standard (Stock): std0  
 Standard DF: 1

| Category    | Concentration average | Concentration RSD | Standard Concentration |
|-------------|-----------------------|-------------------|------------------------|
| 6Li (KED)   | 102.592 %             |                   |                        |
| 9Be (KED)   | 0.000 ppb             |                   | 0.000 ppb              |
| 11B (KED)   | 0.000 ppb             | 0.2 %             | 0.000 ppb              |
| 24Mg (KED)  | 0.000 ppb             | 0.1 %             | 0.000 ppb              |
| 27Al (KED)  | 0.000 ppb             | 0.2 %             | 0.000 ppb              |
| 45Sc (KED)  | 102.096 %             |                   |                        |
| 51V (KED)   | 0.000 ppb             | 0.5 %             | 0.000 ppb              |
| 52Cr (KED)  | 0.000 ppb             | 0.1 %             | 0.000 ppb              |
| 55Mn (KED)  | 0.000 ppb             | 0.2 %             | 0.000 ppb              |
| 56Fe (KED)  | 0.000 ppb             | 0.0 %             | 0.000 ppb              |
| 58Ni (KED)  | 0.000 ppb             | 0.2 %             | 0.000 ppb              |
| 59Co (KED)  | 0.000 ppb             | 0.2 %             | 0.000 ppb              |
| 63Cu (KED)  | 0.000 ppb             | 0.1 %             | 0.000 ppb              |
| 64Zn (KED)  | 0.000 ppb             | 0.0 %             | 0.000 ppb              |
| 69Ga (KED)  | 0.000 ppb             | 0.1 %             | 0.000 ppb              |
| 75As (KED)  | 0.000 ppb             | 0.0 %             | 0.000 ppb              |
| 80Se (KED)  | 0.000 ppb             | 0.0 %             | 0.000 ppb              |
| 85Rb (KED)  | 0.000 ppb             | 0.2 %             | 0.000 ppb              |
| 88Sr (KED)  | 0.000 ppb             | 0.1 %             | 0.000 ppb              |
| 89Y (KED)   | 104.591 %             |                   |                        |
| 107Ag (KED) | 0.000 ppb             | 0.2 %             | 0.000 ppb              |
| 114Cd (KED) | 0.000 ppb             | 0.2 %             | 0.000 ppb              |
| 115In (KED) | 102.730 %             |                   |                        |
| 133Cs (KED) | 0.000 ppb             | 0.2 %             | 0.000 ppb              |
| 138Ba (KED) | 0.000 ppb             | 0.0 %             | 0.000 ppb              |
| 139La (KED) | 0.000 ppb             | 0.1 %             | 0.000 ppb              |
| 140Ce (KED) | 0.000 ppb             | 0.1 %             | 0.000 ppb              |
| 141Pr (KED) | 0.000 ppb             | 0.2 %             | 0.000 ppb              |
| 142Nd (KED) | 0.000 ppb             | 0.1 %             | 0.000 ppb              |
| 152Sm (KED) | 0.000 ppb             | 0.1 %             | 0.000 ppb              |
| 153Eu (KED) | 0.000 ppb             | 0.3 %             | 0.000 ppb              |
| 158Gd (KED) | 0.000 ppb             | 0.6 %             | 0.000 ppb              |
| 159Tb (KED) | 102.122 %             |                   |                        |
| 164Dy (KED) | 0.000 ppb             | 0.6 %             | 0.000 ppb              |
| 166Er (KED) | 0.000 ppb             | 0.1 %             | 0.000 ppb              |
| 169Tm (KED) | 0.000 ppb             | 0.1 %             | 0.000 ppb              |
| 174Yb (KED) | 0.000 ppb             | 0.3 %             | 0.000 ppb              |
| 175Lu (KED) | 0.000 ppb             | 0.0 %             | 0.000 ppb              |
| 205Tl (KED) | 0.000 ppb             | 0.1 %             | 0.000 ppb              |
| 208Pb (KED) | 0.000 ppb             | 0.0 %             | 0.000 ppb              |
| 209Bi (KED) | 102.142 %             |                   |                        |
| 232Th (KED) | 0.000 ppb             | 0.0 %             | 0.000 ppb              |
| 238U (KED)  | 0.000 ppb             | 0.1 %             | 0.000 ppb              |

**Standards:**

Analysis Index: 4  
 Analysis Name: 50+20  
 Analysis Type: STD  
 Analysis Started at: 9/23/2021 3:49:36 PM  
 Standard (Stock): std1  
 Standard DF: 1

| Category    | Concentration average | Concentration RSD | Standard Concentration |
|-------------|-----------------------|-------------------|------------------------|
| 6Li (KED)   | 103.875 %             |                   |                        |
| 9Be (KED)   | 52.130 ppb            | 6.9 %             | 50.000 ppb             |
| 11B (KED)   | 52.641 ppb            | 5.1 %             | 50.000 ppb             |
| 24Mg (KED)  | 51.933 ppb            | 2.0 %             | 50.000 ppb             |
| 27Al (KED)  | 50.282 ppb            | 2.9 %             | 50.000 ppb             |
| 45Sc (KED)  | 106.674 %             |                   |                        |
| 51V (KED)   | 50.660 ppb            | 2.3 %             | 50.000 ppb             |
| 52Cr (KED)  | 50.619 ppb            | 2.0 %             | 50.000 ppb             |
| 55Mn (KED)  | 50.608 ppb            | 2.3 %             | 50.000 ppb             |
| 56Fe (KED)  | 50.865 ppb            | 2.1 %             | 50.000 ppb             |
| 58Ni (KED)  | 51.075 ppb            | 2.2 %             | 50.000 ppb             |
| 59Co (KED)  | 51.583 ppb            | 1.9 %             | 50.000 ppb             |
| 63Cu (KED)  | 51.123 ppb            | 0.5 %             | 50.000 ppb             |
| 64Zn (KED)  | 50.575 ppb            | 1.0 %             | 50.000 ppb             |
| 69Ga (KED)  | 50.319 ppb            | 0.6 %             | 50.000 ppb             |
| 75As (KED)  | 51.026 ppb            | 1.0 %             | 50.000 ppb             |
| 80Se (KED)  | 51.288 ppb            | 1.6 %             | 50.000 ppb             |
| 85Rb (KED)  | 50.713 ppb            | 1.1 %             | 50.000 ppb             |
| 88Sr (KED)  | 50.774 ppb            | 1.7 %             | 50.000 ppb             |
| 89Y (KED)   | 106.952 %             |                   |                        |
| 107Ag (KED) | 51.635 ppb            | 0.7 %             | 50.000 ppb             |
| 114Cd (KED) | 51.084 ppb            | 1.2 %             | 50.000 ppb             |
| 115In (KED) | 104.977 %             |                   |                        |
| 133Cs (KED) | 50.679 ppb            | 1.1 %             | 50.000 ppb             |
| 138Ba (KED) | 50.679 ppb            | 1.4 %             | 50.000 ppb             |
| 139La (KED) | 50.967 ppb            | 1.2 %             | 50.000 ppb             |
| 140Ce (KED) | 50.346 ppb            | 1.7 %             | 50.000 ppb             |
| 141Pr (KED) | 51.104 ppb            | 1.7 %             | 50.000 ppb             |
| 142Nd (KED) | 50.694 ppb            | 1.4 %             | 50.000 ppb             |
| 152Sm (KED) | 51.027 ppb            | 0.3 %             | 50.000 ppb             |
| 153Eu (KED) | 50.633 ppb            | 1.4 %             | 50.000 ppb             |
| 158Gd (KED) | 50.721 ppb            | 0.2 %             | 50.000 ppb             |
| 159Tb (KED) | 104.524 %             |                   |                        |
| 164Dy (KED) | 50.741 ppb            | 1.3 %             | 50.000 ppb             |
| 166Er (KED) | 50.576 ppb            | 0.2 %             | 50.000 ppb             |
| 169Tm (KED) | 50.785 ppb            | 0.6 %             | 50.000 ppb             |
| 174Yb (KED) | 50.883 ppb            | 0.7 %             | 50.000 ppb             |
| 175Lu (KED) | 50.732 ppb            | 1.9 %             | 50.000 ppb             |
| 205Tl (KED) | 50.102 ppb            | 1.5 %             | 50.000 ppb             |
| 208Pb (KED) | 50.868 ppb            | 0.6 %             | 50.000 ppb             |
| 209Bi (KED) | 103.071 %             |                   |                        |
| 232Th (KED) | 50.051 ppb            | 1.2 %             | 50.000 ppb             |
| 238U (KED)  | 49.862 ppb            | 2.1 %             | 50.000 ppb             |



## Sample List Summary:

Instrument ID: iCAP Q

| Index: | Label:     | Main<br>Runs: | Survey<br>Runs: | Start Time:          | User name:                    |
|--------|------------|---------------|-----------------|----------------------|-------------------------------|
| 1      | water      | 3             | 0               | 9/23/2021 3:38:58 PM | WINDOWS-UPCI4ER\Administrator |
| 2      | blk        | 3             | 0               | 9/23/2021 3:42:04 PM | WINDOWS-UPCI4ER\Administrator |
| 3      | 0+20       | 3             | 0               | 9/23/2021 3:45:59 PM | WINDOWS-UPCI4ER\Administrator |
| 4      | 50+20      | 3             | 0               | 9/23/2021 3:49:36 PM | WINDOWS-UPCI4ER\Administrator |
| 5      | 100+20     | 3             | 0               | 9/23/2021 3:53:26 PM | WINDOWS-UPCI4ER\Administrator |
| 6      | 20258jian  | 3             | 0               | 9/23/2021 3:57:10 PM | WINDOWS-UPCI4ER\Administrator |
| 7      | 3fu        | 3             | 0               | 9/23/2021 4:01:11 PM | WINDOWS-UPCI4ER\Administrator |
| 8      | 29977jian  | 3             | 0               | 9/23/2021 4:04:51 PM | WINDOWS-UPCI4ER\Administrator |
| 9      | 1jian      | 3             | 0               | 9/23/2021 4:08:26 PM | WINDOWS-UPCI4ER\Administrator |
| 10     | 28737jian  | 3             | 0               | 9/23/2021 4:11:57 PM | WINDOWS-UPCI4ER\Administrator |
| 11     | 001jian    | 3             | 0               | 9/23/2021 4:15:42 PM | WINDOWS-UPCI4ER\Administrator |
| 12     | 0955jian   | 3             | 0               | 9/23/2021 4:19:13 PM | WINDOWS-UPCI4ER\Administrator |
| 13     | 028727jian | 3             | 0               | 9/23/2021 4:22:56 PM | WINDOWS-UPCI4ER\Administrator |
| 14     | 024982jian | 3             | 0               | 9/23/2021 4:26:26 PM | WINDOWS-UPCI4ER\Administrator |
| 15     | 09260jian  | 3             | 0               | 9/23/2021 4:30:01 PM | WINDOWS-UPCI4ER\Administrator |
| 16     | 163380jian | 3             | 0               | 9/23/2021 4:33:31 PM | WINDOWS-UPCI4ER\Administrator |
| 17     | 024965jian | 3             | 0               | 9/23/2021 4:37:06 PM | WINDOWS-UPCI4ER\Administrator |
| 18     | 028728jian | 3             | 0               | 9/23/2021 4:40:37 PM | WINDOWS-UPCI4ER\Administrator |
| 19     | 011048jian | 3             | 0               | 9/23/2021 4:44:12 PM | WINDOWS-UPCI4ER\Administrator |
| 20     | 010195jian | 3             | 0               | 9/23/2021 4:47:39 PM | WINDOWS-UPCI4ER\Administrator |
| 21     | 029899jian | 3             | 0               | 9/23/2021 4:51:10 PM | WINDOWS-UPCI4ER\Administrator |
| 22     | 029767jian | 3             | 0               | 9/23/2021 4:54:37 PM | WINDOWS-UPCI4ER\Administrator |
| 23     | 01737jian  | 3             | 0               | 9/23/2021 4:58:02 PM | WINDOWS-UPCI4ER\Administrator |
| 24     | 011048jian | 3             | 0               | 9/23/2021 5:01:23 PM | WINDOWS-UPCI4ER\Administrator |
| 25     | 010231jian | 3             | 0               | 9/23/2021 5:04:48 PM | WINDOWS-UPCI4ER\Administrator |
| 26     | 0960jian   | 1             | 0               | 9/23/2021 5:08:20 PM | WINDOWS-UPCI4ER\Administrator |
| 27     | 010176jian | 1             | 0               | 9/23/2021 5:10:30 PM | WINDOWS-UPCI4ER\Administrator |
| 28     | 010254jian | 1             | 0               | 9/23/2021 5:12:39 PM | WINDOWS-UPCI4ER\Administrator |
| 29     | 011055jian | 1             | 0               | 9/23/2021 5:14:50 PM | WINDOWS-UPCI4ER\Administrator |



| Category    | Concentration average | Intensity average | Intensity RSD |
|-------------|-----------------------|-------------------|---------------|
| 114Cd (KED) | 110.014 ppb           | 6 cps             | 34.6 %        |
| 115In (KED) | 0.000 %               | 4 cps             | 43.3 %        |
| 133Cs (KED) | 109.950 ppb           | 7 cps             | 100.0 %       |
| 138Ba (KED) | Infinity ppb          | 104 cps           | 37.3 %        |
| 139La (KED) |                       | 1 cps             | 173.2 %       |
| 140Ce (KED) |                       | 8 cps             | 89.2 %        |
| 141Pr (KED) |                       | 1 cps             | 173.2 %       |
| 142Nd (KED) |                       | 1 cps             | 173.2 %       |
| 152Sm (KED) |                       | 0 cps             |               |
| 153Eu (KED) |                       | 0 cps             |               |
| 158Gd (KED) |                       | 0 cps             |               |
| 159Tb (KED) | 0.000 %               | 0 cps             |               |
| 164Dy (KED) |                       | 0 cps             |               |
| 166Er (KED) |                       | 0 cps             |               |
| 169Tm (KED) |                       | 0 cps             |               |
| 174Yb (KED) |                       | 0 cps             |               |
| 175Lu (KED) |                       | 0 cps             |               |
| 205Tl (KED) | 16.838 ppb            | 23 cps            | 75.6 %        |
| 208Pb (KED) | 46.059 ppb            | 60 cps            | 44.1 %        |
| 209Bi (KED) | 0.002 %               | 146 cps           | 125.6 %       |
| 232Th (KED) | 1.615 ppb             | 3 cps             | 0.0 %         |
| 238U (KED)  | 17.763 ppb            | 126 cps           | 131.9 %       |

## Sample Summary

Instrument ID: iCAP Q

Analysis index: 2

Analysis name: blk

Analysis started at: 9/23/2021 3:42:04 PM

User name: WINDOWS-UPCI4ER\Administrator

| Category    | Concentration average | Concentration RSD |
|-------------|-----------------------|-------------------|
| 6Li (KED)   | 100.000 %             |                   |
| 9Be (KED)   | 0.000 ppb             |                   |
| 11B (KED)   | 0.057 ppb             | 1,211.4 %         |
| 24Mg (KED)  | 0.222 ppb             | 18.3 %            |
| 27Al (KED)  | 0.101 ppb             | 24.6 %            |
| 45Sc (KED)  | 100.000 %             |                   |
| 51V (KED)   | 0.001 ppb             | 287.9 %           |
| 52Cr (KED)  | -0.003 ppb            | 97.1 %            |
| 55Mn (KED)  | 0.005 ppb             | 126.9 %           |
| 56Fe (KED)  | 0.047 ppb             | 126.4 %           |
| 58Ni (KED)  | -0.068 ppb            | 101.9 %           |
| 59Co (KED)  | -0.001 ppb            | 248.1 %           |
| 63Cu (KED)  | 0.013 ppb             | 64.7 %            |
| 64Zn (KED)  | 0.018 ppb             | 585.4 %           |
| 69Ga (KED)  | -0.001 ppb            | 1,596.7 %         |
| 75As (KED)  | 0.017 ppb             | 89.4 %            |
| 80Se (KED)  | 0.053 ppb             | 76.3 %            |
| 85Rb (KED)  | 0.003 ppb             | 150.1 %           |
| 88Sr (KED)  | 0.001 ppb             | 408.7 %           |
| 89Y (KED)   | 100.000 %             |                   |
| 107Ag (KED) | 0.000 ppb             | 427.1 %           |
| 114Cd (KED) | 0.000 ppb             | 213.7 %           |
| 115In (KED) | 100.000 %             |                   |
| 133Cs (KED) | 0.000 ppb             | 83.6 %            |
| 138Ba (KED) | 0.003 ppb             | 159.9 %           |
| 139La (KED) | 0.000 ppb             | 33.6 %            |
| 140Ce (KED) | 0.000 ppb             | 185.5 %           |
| 141Pr (KED) | 0.000 ppb             | 86.0 %            |
| 142Nd (KED) | 0.000 ppb             | 602.5 %           |
| 152Sm (KED) | 0.000 ppb             | 195.9 %           |
| 153Eu (KED) | 0.000 ppb             | 278.6 %           |
| 158Gd (KED) | 0.000 ppb             | 267.1 %           |
| 159Tb (KED) | 100.000 %             |                   |
| 164Dy (KED) | 0.000 ppb             | 31.1 %            |
| 166Er (KED) | 0.001 ppb             | 75.8 %            |
| 169Tm (KED) | 0.000 ppb             | 115.7 %           |
| 174Yb (KED) | 0.000 ppb             | 83.7 %            |
| 175Lu (KED) | 0.136 ppb             | 10.2 %            |
| 205Tl (KED) | 0.000 ppb             | 13,387.3 %        |
| 208Pb (KED) | -0.001 ppb            | 162.4 %           |
| 209Bi (KED) | 100.000 %             |                   |
| 232Th (KED) | 0.000 ppb             | 106.7 %           |
| 238U (KED)  | 0.000 ppb             | 119.3 %           |

| Category   | Concentration average | Intensity average | Intensity RSD |
|------------|-----------------------|-------------------|---------------|
| 6Li (KED)  | 100.000 %             | 4,417 cps         | 1.7 %         |
| 9Be (KED)  | 0.000 ppb             | 0 cps             |               |
| 11B (KED)  | 0.057 ppb             | 322 cps           | 10.5 %        |
| 24Mg (KED) | 0.222 ppb             | 422 cps           | 2.0 %         |
| 27Al (KED) | 0.101 ppb             | 124 cps           | 1.5 %         |

| Category    | Concentration average | Intensity average | Intensity RSD |
|-------------|-----------------------|-------------------|---------------|
| 45Sc (KED)  | 100.000 %             | 54,840 cps        | 0.2 %         |
| 51V (KED)   | 0.001 ppb             | 10 cps            | 100.0 %       |
| 52Cr (KED)  | -0.003 ppb            | 96 cps            | 20.1 %        |
| 55Mn (KED)  | 0.005 ppb             | 156 cps           | 15.2 %        |
| 56Fe (KED)  | 0.047 ppb             | 4,180 cps         | 9.8 %         |
| 58Ni (KED)  | -0.068 ppb            | 3,153 cps         | 20.6 %        |
| 59Co (KED)  | -0.001 ppb            | 113 cps           | 25.6 %        |
| 63Cu (KED)  | 0.013 ppb             | 1,088 cps         | 9.3 %         |
| 64Zn (KED)  | 0.018 ppb             | 5,811 cps         | 4.6 %         |
| 69Ga (KED)  | -0.001 ppb            | 81 cps            | 37.3 %        |
| 75As (KED)  | 0.017 ppb             | 28 cps            | 48.5 %        |
| 80Se (KED)  | 0.053 ppb             | 594 cps           | 2.3 %         |
| 85Rb (KED)  | 0.003 ppb             | 34 cps            | 47.7 %        |
| 88Sr (KED)  | 0.001 ppb             | 262 cps           | 6.3 %         |
| 89Y (KED)   | 100.000 %             | 563,331 cps       | 0.6 %         |
| 107Ag (KED) | 0.000 ppb             | 43 cps            | 42.8 %        |
| 114Cd (KED) | 0.000 ppb             | 104 cps           | 6.6 %         |
| 115In (KED) | 100.000 %             | 1,192,673 cps     | 1.2 %         |
| 133Cs (KED) | 0.000 ppb             | 49 cps            | 17.2 %        |
| 138Ba (KED) | 0.003 ppb             | 2,515 cps         | 5.3 %         |
| 139La (KED) | 0.000 ppb             | 129 cps           | 4.0 %         |
| 140Ce (KED) | 0.000 ppb             | 419 cps           | 8.9 %         |
| 141Pr (KED) | 0.000 ppb             | 51 cps            | 13.6 %        |
| 142Nd (KED) | 0.000 ppb             | 106 cps           | 30.3 %        |
| 152Sm (KED) | 0.000 ppb             | 11 cps            | 75.5 %        |
| 153Eu (KED) | 0.000 ppb             | 13 cps            | 75.0 %        |
| 158Gd (KED) | 0.000 ppb             | 20 cps            | 33.3 %        |
| 159Tb (KED) | 100.000 %             | 7,582,228 cps     | 1.4 %         |
| 164Dy (KED) | 0.000 ppb             | 47 cps            | 7.1 %         |
| 166Er (KED) | 0.001 ppb             | 799 cps           | 4.4 %         |
| 169Tm (KED) | 0.000 ppb             | 21 cps            | 39.7 %        |
| 174Yb (KED) | 0.000 ppb             | 57 cps            | 15.6 %        |
| 175Lu (KED) | 0.136 ppb             | 107,503 cps       | 3.1 %         |
| 205Tl (KED) | 0.000 ppb             | 77 cps            | 41.9 %        |
| 208Pb (KED) | -0.001 ppb            | 22,177 cps        | 1.5 %         |
| 209Bi (KED) | 100.000 %             | 7,640,626 cps     | 1.3 %         |
| 232Th (KED) | 0.000 ppb             | 356 cps           | 16.5 %        |
| 238U (KED)  | 0.000 ppb             | 182 cps           | 13.0 %        |

## Sample Summary

Instrument ID: iCAP Q

Analysis index: 3

Analysis name: 0+20

Analysis started at: 9/23/2021 3:45:59 PM

User name: WINDOWS-UPCI4ER\Administrator

| Category    | Concentration average | Concentration RSD |
|-------------|-----------------------|-------------------|
| 6Li (KED)   | 102.592 %             |                   |
| 9Be (KED)   | 0.000 ppb             |                   |
| 11B (KED)   | 0.000 ppb             | 0.2 %             |
| 24Mg (KED)  | 0.000 ppb             | 0.1 %             |
| 27Al (KED)  | 0.000 ppb             | 0.2 %             |
| 45Sc (KED)  | 102.096 %             |                   |
| 51V (KED)   | 0.000 ppb             | 0.5 %             |
| 52Cr (KED)  | 0.000 ppb             | 0.1 %             |
| 55Mn (KED)  | 0.000 ppb             | 0.2 %             |
| 56Fe (KED)  | 0.000 ppb             | 0.0 %             |
| 58Ni (KED)  | 0.000 ppb             | 0.2 %             |
| 59Co (KED)  | 0.000 ppb             | 0.2 %             |
| 63Cu (KED)  | 0.000 ppb             | 0.1 %             |
| 64Zn (KED)  | 0.000 ppb             | 0.0 %             |
| 69Ga (KED)  | 0.000 ppb             | 0.1 %             |
| 75As (KED)  | 0.000 ppb             | 0.0 %             |
| 80Se (KED)  | 0.000 ppb             | 0.0 %             |
| 85Rb (KED)  | 0.000 ppb             | 0.2 %             |
| 88Sr (KED)  | 0.000 ppb             | 0.1 %             |
| 89Y (KED)   | 104.591 %             |                   |
| 107Ag (KED) | 0.000 ppb             | 0.2 %             |
| 114Cd (KED) | 0.000 ppb             | 0.2 %             |
| 115In (KED) | 102.730 %             |                   |
| 133Cs (KED) | 0.000 ppb             | 0.2 %             |
| 138Ba (KED) | 0.000 ppb             | 0.0 %             |
| 139La (KED) | 0.000 ppb             | 0.1 %             |
| 140Ce (KED) | 0.000 ppb             | 0.1 %             |
| 141Pr (KED) | 0.000 ppb             | 0.2 %             |
| 142Nd (KED) | 0.000 ppb             | 0.1 %             |
| 152Sm (KED) | 0.000 ppb             | 0.1 %             |
| 153Eu (KED) | 0.000 ppb             | 0.3 %             |
| 158Gd (KED) | 0.000 ppb             | 0.6 %             |
| 159Tb (KED) | 102.122 %             |                   |
| 164Dy (KED) | 0.000 ppb             | 0.6 %             |
| 166Er (KED) | 0.000 ppb             | 0.1 %             |
| 169Tm (KED) | 0.000 ppb             | 0.1 %             |
| 174Yb (KED) | 0.000 ppb             | 0.3 %             |
| 175Lu (KED) | 0.000 ppb             | 0.0 %             |
| 205Tl (KED) | 0.000 ppb             | 0.1 %             |
| 208Pb (KED) | 0.000 ppb             | 0.0 %             |
| 209Bi (KED) | 102.142 %             |                   |
| 232Th (KED) | 0.000 ppb             | 0.0 %             |
| 238U (KED)  | 0.000 ppb             | 0.1 %             |

| Category   | Concentration average | Intensity average | Intensity RSD |
|------------|-----------------------|-------------------|---------------|
| 6Li (KED)  | 102.592 %             | 4,532 cps         | 3.9 %         |
| 9Be (KED)  | 0.000 ppb             | 0 cps             |               |
| 11B (KED)  | 0.000 ppb             | 327 cps           | 13.4 %        |
| 24Mg (KED) | 0.000 ppb             | 361 cps           | 7.4 %         |
| 27Al (KED) | 0.000 ppb             | 119 cps           | 20.7 %        |

| Category    | Concentration average | Intensity average | Intensity RSD |
|-------------|-----------------------|-------------------|---------------|
| 45Sc (KED)  | 102.096 %             | 55,990 cps        | 0.2 %         |
| 51V (KED)   | 0.000 ppb             | 7 cps             | 50.0 %        |
| 52Cr (KED)  | 0.000 ppb             | 118 cps           | 8.6 %         |
| 55Mn (KED)  | 0.000 ppb             | 140 cps           | 21.4 %        |
| 56Fe (KED)  | 0.000 ppb             | 3,930 cps         | 2.4 %         |
| 58Ni (KED)  | 0.000 ppb             | 3,868 cps         | 20.2 %        |
| 59Co (KED)  | 0.000 ppb             | 128 cps           | 17.4 %        |
| 63Cu (KED)  | 0.000 ppb             | 972 cps           | 9.4 %         |
| 64Zn (KED)  | 0.000 ppb             | 6,026 cps         | 3.4 %         |
| 69Ga (KED)  | 0.000 ppb             | 87 cps            | 6.7 %         |
| 75As (KED)  | 0.000 ppb             | 13 cps            | 0.0 %         |
| 80Se (KED)  | 0.000 ppb             | 608 cps           | 5.0 %         |
| 85Rb (KED)  | 0.000 ppb             | 24 cps            | 15.7 %        |
| 88Sr (KED)  | 0.000 ppb             | 270 cps           | 9.8 %         |
| 89Y (KED)   | 104.591 %             | 589,195 cps       | 1.2 %         |
| 107Ag (KED) | 0.000 ppb             | 49 cps            | 20.8 %        |
| 114Cd (KED) | 0.000 ppb             | 104 cps           | 14.7 %        |
| 115In (KED) | 102.730 %             | 1,225,230 cps     | 0.5 %         |
| 133Cs (KED) | 0.000 ppb             | 61 cps            | 16.7 %        |
| 138Ba (KED) | 0.000 ppb             | 2,467 cps         | 3.1 %         |
| 139La (KED) | 0.000 ppb             | 151 cps           | 7.7 %         |
| 140Ce (KED) | 0.000 ppb             | 452 cps           | 7.4 %         |
| 141Pr (KED) | 0.000 ppb             | 61 cps            | 19.2 %        |
| 142Nd (KED) | 0.000 ppb             | 113 cps           | 13.5 %        |
| 152Sm (KED) | 0.000 ppb             | 16 cps            | 12.4 %        |
| 153Eu (KED) | 0.000 ppb             | 10 cps            | 33.3 %        |
| 158Gd (KED) | 0.000 ppb             | 18 cps            | 60.3 %        |
| 159Tb (KED) | 102.122 %             | 7,743,150 cps     | 1.0 %         |
| 164Dy (KED) | 0.000 ppb             | 38 cps            | 57.4 %        |
| 166Er (KED) | 0.000 ppb             | 754 cps           | 9.5 %         |
| 169Tm (KED) | 0.000 ppb             | 29 cps            | 6.7 %         |
| 174Yb (KED) | 0.000 ppb             | 48 cps            | 34.4 %        |
| 175Lu (KED) | 0.000 ppb             | 89,989 cps        | 3.0 %         |
| 205Tl (KED) | 0.000 ppb             | 78 cps            | 6.5 %         |
| 208Pb (KED) | 0.000 ppb             | 22,822 cps        | 2.8 %         |
| 209Bi (KED) | 102.142 %             | 7,804,308 cps     | 0.9 %         |
| 232Th (KED) | 0.000 ppb             | 306 cps           | 1.7 %         |
| 238U (KED)  | 0.000 ppb             | 164 cps           | 14.4 %        |

## Sample Summary

Instrument ID: iCAP Q

Analysis index: 4

Analysis name: 50+20

Analysis started at: 9/23/2021 3:49:36 PM

User name: WINDOWS-UPCI4ER\Administrator

| Category    | Concentration average | Concentration RSD |
|-------------|-----------------------|-------------------|
| 6Li (KED)   | 103.875 %             |                   |
| 9Be (KED)   | 52.130 ppb            | 6.9 %             |
| 11B (KED)   | 52.641 ppb            | 5.1 %             |
| 24Mg (KED)  | 51.933 ppb            | 2.0 %             |
| 27Al (KED)  | 50.282 ppb            | 2.9 %             |
| 45Sc (KED)  | 106.674 %             |                   |
| 51V (KED)   | 50.660 ppb            | 2.3 %             |
| 52Cr (KED)  | 50.619 ppb            | 2.0 %             |
| 55Mn (KED)  | 50.608 ppb            | 2.3 %             |
| 56Fe (KED)  | 50.865 ppb            | 2.1 %             |
| 58Ni (KED)  | 51.075 ppb            | 2.2 %             |
| 59Co (KED)  | 51.583 ppb            | 1.9 %             |
| 63Cu (KED)  | 51.123 ppb            | 0.5 %             |
| 64Zn (KED)  | 50.575 ppb            | 1.0 %             |
| 69Ga (KED)  | 50.319 ppb            | 0.6 %             |
| 75As (KED)  | 51.026 ppb            | 1.0 %             |
| 80Se (KED)  | 51.288 ppb            | 1.6 %             |
| 85Rb (KED)  | 50.713 ppb            | 1.1 %             |
| 88Sr (KED)  | 50.774 ppb            | 1.7 %             |
| 89Y (KED)   | 106.952 %             |                   |
| 107Ag (KED) | 51.635 ppb            | 0.7 %             |
| 114Cd (KED) | 51.084 ppb            | 1.2 %             |
| 115In (KED) | 104.977 %             |                   |
| 133Cs (KED) | 50.679 ppb            | 1.1 %             |
| 138Ba (KED) | 50.679 ppb            | 1.4 %             |
| 139La (KED) | 50.967 ppb            | 1.2 %             |
| 140Ce (KED) | 50.346 ppb            | 1.7 %             |
| 141Pr (KED) | 51.104 ppb            | 1.7 %             |
| 142Nd (KED) | 50.694 ppb            | 1.4 %             |
| 152Sm (KED) | 51.027 ppb            | 0.3 %             |
| 153Eu (KED) | 50.633 ppb            | 1.4 %             |
| 158Gd (KED) | 50.721 ppb            | 0.2 %             |
| 159Tb (KED) | 104.524 %             |                   |
| 164Dy (KED) | 50.741 ppb            | 1.3 %             |
| 166Er (KED) | 50.576 ppb            | 0.2 %             |
| 169Tm (KED) | 50.785 ppb            | 0.6 %             |
| 174Yb (KED) | 50.883 ppb            | 0.7 %             |
| 175Lu (KED) | 50.732 ppb            | 1.9 %             |
| 205Tl (KED) | 50.102 ppb            | 1.5 %             |
| 208Pb (KED) | 50.868 ppb            | 0.6 %             |
| 209Bi (KED) | 103.071 %             |                   |
| 232Th (KED) | 50.051 ppb            | 1.2 %             |
| 238U (KED)  | 49.862 ppb            | 2.1 %             |

| Category   | Concentration average | Intensity average | Intensity RSD |
|------------|-----------------------|-------------------|---------------|
| 6Li (KED)  | 103.875 %             | 4,589 cps         | 1.7 %         |
| 9Be (KED)  | 52.130 ppb            | 4,972 cps         | 5.8 %         |
| 11B (KED)  | 52.641 ppb            | 3,003 cps         | 3.2 %         |
| 24Mg (KED) | 51.933 ppb            | 17,269 cps        | 0.7 %         |
| 27Al (KED) | 50.282 ppb            | 4,364 cps         | 0.8 %         |

| Category    | Concentration average | Intensity average | Intensity RSD |
|-------------|-----------------------|-------------------|---------------|
| 45Sc (KED)  | 106.674 %             | 58,500 cps        | 2.5 %         |
| 51V (KED)   | 50.660 ppb            | 268,109 cps       | 0.4 %         |
| 52Cr (KED)  | 50.619 ppb            | 417,761 cps       | 1.4 %         |
| 55Mn (KED)  | 50.608 ppb            | 207,412 cps       | 1.0 %         |
| 56Fe (KED)  | 50.865 ppb            | 390,159 cps       | 0.6 %         |
| 58Ni (KED)  | 51.075 ppb            | 515,359 cps       | 0.4 %         |
| 59Co (KED)  | 51.583 ppb            | 864,937 cps       | 0.6 %         |
| 63Cu (KED)  | 51.123 ppb            | 656,795 cps       | 0.3 %         |
| 64Zn (KED)  | 50.575 ppb            | 163,160 cps       | 0.6 %         |
| 69Ga (KED)  | 50.319 ppb            | 197,745 cps       | 0.2 %         |
| 75As (KED)  | 51.026 ppb            | 47,099 cps        | 0.5 %         |
| 80Se (KED)  | 51.288 ppb            | 14,699 cps        | 1.6 %         |
| 85Rb (KED)  | 50.713 ppb            | 198,724 cps       | 1.5 %         |
| 88Sr (KED)  | 50.774 ppb            | 283,705 cps       | 1.1 %         |
| 89Y (KED)   | 106.952 %             | 602,496 cps       | 0.6 %         |
| 107Ag (KED) | 51.635 ppb            | 2,152,512 cps     | 0.6 %         |
| 114Cd (KED) | 51.084 ppb            | 775,221 cps       | 1.3 %         |
| 115In (KED) | 104.977 %             | 1,252,027 cps     | 0.2 %         |
| 133Cs (KED) | 50.679 ppb            | 1,154,223 cps     | 1.2 %         |
| 138Ba (KED) | 50.679 ppb            | 1,690,486 cps     | 0.9 %         |
| 139La (KED) | 50.967 ppb            | 3,544,687 cps     | 0.8 %         |
| 140Ce (KED) | 50.346 ppb            | 4,760,864 cps     | 1.4 %         |
| 141Pr (KED) | 51.104 ppb            | 5,078,666 cps     | 1.3 %         |
| 142Nd (KED) | 50.694 ppb            | 2,061,776 cps     | 1.0 %         |
| 152Sm (KED) | 51.027 ppb            | 2,031,152 cps     | 0.7 %         |
| 153Eu (KED) | 50.633 ppb            | 4,024,215 cps     | 0.9 %         |
| 158Gd (KED) | 50.721 ppb            | 2,868,557 cps     | 0.4 %         |
| 159Tb (KED) | 104.524 %             | 7,925,250 cps     | 0.6 %         |
| 164Dy (KED) | 50.741 ppb            | 3,213,648 cps     | 1.3 %         |
| 166Er (KED) | 50.576 ppb            | 3,924,814 cps     | 0.4 %         |
| 169Tm (KED) | 50.785 ppb            | 13,200,406 cps    | 0.5 %         |
| 174Yb (KED) | 50.883 ppb            | 4,897,966 cps     | 1.3 %         |
| 175Lu (KED) | 50.732 ppb            | 7,646,331 cps     | 1.9 %         |
| 205Tl (KED) | 50.102 ppb            | 10,305,067 cps    | 1.1 %         |
| 208Pb (KED) | 50.868 ppb            | 7,236,681 cps     | 1.0 %         |
| 209Bi (KED) | 103.071 %             | 7,875,251 cps     | 1.6 %         |
| 232Th (KED) | 50.051 ppb            | 14,402,716 cps    | 0.4 %         |
| 238U (KED)  | 49.862 ppb            | 17,565,810 cps    | 0.5 %         |

## Sample Summary

Instrument ID: iCAP Q

Analysis index: 5

Analysis name: 100+20

Analysis started at: 9/23/2021 3:53:26 PM

User name: WINDOWS-UPCI4ER\Administrator

| Category    | Concentration average | Concentration RSD |
|-------------|-----------------------|-------------------|
| 6Li (KED)   | 107.523 %             |                   |
| 9Be (KED)   | 98.935 ppb            | 3.0 %             |
| 11B (KED)   | 98.680 ppb            | 3.0 %             |
| 24Mg (KED)  | 99.034 ppb            | 1.4 %             |
| 27Al (KED)  | 99.859 ppb            | 4.0 %             |
| 45Sc (KED)  | 107.311 %             |                   |
| 51V (KED)   | 99.670 ppb            | 0.4 %             |
| 52Cr (KED)  | 99.690 ppb            | 0.4 %             |
| 55Mn (KED)  | 99.696 ppb            | 0.5 %             |
| 56Fe (KED)  | 99.567 ppb            | 1.5 %             |
| 58Ni (KED)  | 99.463 ppb            | 0.5 %             |
| 59Co (KED)  | 99.208 ppb            | 0.3 %             |
| 63Cu (KED)  | 99.438 ppb            | 1.6 %             |
| 64Zn (KED)  | 99.712 ppb            | 1.5 %             |
| 69Ga (KED)  | 99.840 ppb            | 2.8 %             |
| 75As (KED)  | 99.487 ppb            | 1.2 %             |
| 80Se (KED)  | 99.356 ppb            | 1.5 %             |
| 85Rb (KED)  | 99.644 ppb            | 1.6 %             |
| 88Sr (KED)  | 99.613 ppb            | 2.0 %             |
| 89Y (KED)   | 106.466 %             |                   |
| 107Ag (KED) | 99.182 ppb            | 1.2 %             |
| 114Cd (KED) | 99.458 ppb            | 1.8 %             |
| 115In (KED) | 105.055 %             |                   |
| 133Cs (KED) | 99.661 ppb            | 2.1 %             |
| 138Ba (KED) | 99.661 ppb            | 1.5 %             |
| 139La (KED) | 99.517 ppb            | 1.4 %             |
| 140Ce (KED) | 99.827 ppb            | 1.6 %             |
| 141Pr (KED) | 99.448 ppb            | 0.3 %             |
| 142Nd (KED) | 99.653 ppb            | 0.6 %             |
| 152Sm (KED) | 99.486 ppb            | 0.4 %             |
| 153Eu (KED) | 99.684 ppb            | 0.9 %             |
| 158Gd (KED) | 99.639 ppb            | 2.6 %             |
| 159Tb (KED) | 104.741 %             |                   |
| 164Dy (KED) | 99.630 ppb            | 2.4 %             |
| 166Er (KED) | 99.712 ppb            | 0.6 %             |
| 169Tm (KED) | 99.608 ppb            | 1.1 %             |
| 174Yb (KED) | 99.559 ppb            | 0.9 %             |
| 175Lu (KED) | 99.634 ppb            | 0.8 %             |
| 205Tl (KED) | 99.949 ppb            | 0.7 %             |
| 208Pb (KED) | 99.566 ppb            | 0.1 %             |
| 209Bi (KED) | 101.642 %             |                   |
| 232Th (KED) | 99.974 ppb            | 0.8 %             |
| 238U (KED)  | 100.069 ppb           | 1.8 %             |

| Category   | Concentration average | Intensity average | Intensity RSD |
|------------|-----------------------|-------------------|---------------|
| 6Li (KED)  | 107.523 %             | 4,750 cps         | 2.2 %         |
| 9Be (KED)  | 98.935 ppb            | 9,769 cps         | 0.8 %         |
| 11B (KED)  | 98.680 ppb            | 5,527 cps         | 2.0 %         |
| 24Mg (KED) | 99.034 ppb            | 33,743 cps        | 0.9 %         |
| 27Al (KED) | 99.859 ppb            | 8,597 cps         | 3.0 %         |

| Category    | Concentration average | Intensity average | Intensity RSD |
|-------------|-----------------------|-------------------|---------------|
| 45Sc (KED)  | 107.311 %             | 58,850 cps        | 1.1 %         |
| 51V (KED)   | 99.670 ppb            | 530,828 cps       | 1.1 %         |
| 52Cr (KED)  | 99.690 ppb            | 827,777 cps       | 1.3 %         |
| 55Mn (KED)  | 99.696 ppb            | 411,024 cps       | 0.9 %         |
| 56Fe (KED)  | 99.567 ppb            | 764,584 cps       | 1.8 %         |
| 58Ni (KED)  | 99.463 ppb            | 1,006,130 cps     | 1.4 %         |
| 59Co (KED)  | 99.208 ppb            | 1,673,801 cps     | 0.8 %         |
| 63Cu (KED)  | 99.438 ppb            | 1,270,647 cps     | 1.1 %         |
| 64Zn (KED)  | 99.712 ppb            | 314,227 cps       | 0.6 %         |
| 69Ga (KED)  | 99.840 ppb            | 390,389 cps       | 1.4 %         |
| 75As (KED)  | 99.487 ppb            | 91,393 cps        | 0.5 %         |
| 80Se (KED)  | 99.356 ppb            | 27,762 cps        | 0.7 %         |
| 85Rb (KED)  | 99.644 ppb            | 388,623 cps       | 1.3 %         |
| 88Sr (KED)  | 99.613 ppb            | 553,755 cps       | 1.0 %         |
| 89Y (KED)   | 106.466 %             | 599,753 cps       | 1.4 %         |
| 107Ag (KED) | 99.182 ppb            | 4,137,197 cps     | 0.8 %         |
| 114Cd (KED) | 99.458 ppb            | 1,510,227 cps     | 1.8 %         |
| 115In (KED) | 105.055 %             | 1,252,968 cps     | 1.6 %         |
| 133Cs (KED) | 99.661 ppb            | 2,270,919 cps     | 0.6 %         |
| 138Ba (KED) | 99.661 ppb            | 3,328,683 cps     | 0.6 %         |
| 139La (KED) | 99.517 ppb            | 6,935,415 cps     | 1.1 %         |
| 140Ce (KED) | 99.827 ppb            | 9,459,743 cps     | 2.1 %         |
| 141Pr (KED) | 99.448 ppb            | 9,904,047 cps     | 1.2 %         |
| 142Nd (KED) | 99.653 ppb            | 4,061,496 cps     | 1.1 %         |
| 152Sm (KED) | 99.486 ppb            | 3,968,302 cps     | 1.1 %         |
| 153Eu (KED) | 99.684 ppb            | 7,939,826 cps     | 1.7 %         |
| 158Gd (KED) | 99.639 ppb            | 5,645,986 cps     | 1.7 %         |
| 159Tb (KED) | 104.741 %             | 7,941,702 cps     | 0.9 %         |
| 164Dy (KED) | 99.630 ppb            | 6,322,325 cps     | 1.6 %         |
| 166Er (KED) | 99.712 ppb            | 7,753,094 cps     | 0.9 %         |
| 169Tm (KED) | 99.608 ppb            | 25,944,197 cps    | 1.1 %         |
| 174Yb (KED) | 99.559 ppb            | 9,602,613 cps     | 0.5 %         |
| 175Lu (KED) | 99.634 ppb            | 14,959,529 cps    | 1.4 %         |
| 205Tl (KED) | 99.949 ppb            | 20,273,976 cps    | 0.5 %         |
| 208Pb (KED) | 99.566 ppb            | 13,947,402 cps    | 1.3 %         |
| 209Bi (KED) | 101.642 %             | 7,766,103 cps     | 1.2 %         |
| 232Th (KED) | 99.974 ppb            | 28,372,022 cps    | 1.0 %         |
| 238U (KED)  | 100.069 ppb           | 34,770,960 cps    | 2.0 %         |

## Sample Summary

Instrument ID: iCAP Q

Analysis index: 6

Analysis name: 20258jian

Analysis started at: 9/23/2021 3:57:10 PM

User name: WINDOWS-UPCI4ER\Administrator

| Category    | Concentration average | Concentration RSD |
|-------------|-----------------------|-------------------|
| 6Li (KED)   | 58.688 %              | 5.1 %             |
| 9Be (KED)   | 0.398 ppb             | 55.5 %            |
| 11B (KED)   | 41.126 ppb            | 11.1 %            |
| 24Mg (KED)  | 1,337.098 ppb         | 1.2 %             |
| 27Al (KED)  | 1,603.408 ppb         | 1.9 %             |
| 45Sc (KED)  | 59.586 %              | 2.9 %             |
| 51V (KED)   | 3.112 ppb             | 6.5 %             |
| 52Cr (KED)  | 7.111 ppb             | 3.8 %             |
| 55Mn (KED)  | 36.181 ppb            | 0.4 %             |
| 56Fe (KED)  | 1,585.886 ppb         | 0.8 %             |
| 58Ni (KED)  | 7.533 ppb             | 3.3 %             |
| 59Co (KED)  | 0.825 ppb             | 11.9 %            |
| 63Cu (KED)  | 11.194 ppb            | 0.3 %             |
| 64Zn (KED)  | 352.871 ppb           | 2.1 %             |
| 69Ga (KED)  | 3.452 ppb             | 4.9 %             |
| 75As (KED)  | 1.794 ppb             | 7.7 %             |
| 80Se (KED)  | 5.650 ppb             | 4.6 %             |
| 85Rb (KED)  | 3.944 ppb             | 1.5 %             |
| 88Sr (KED)  | 15.182 ppb            | 1.2 %             |
| 89Y (KED)   | 56.900 %              | 0.4 %             |
| 107Ag (KED) | 0.248 ppb             | 17.1 %            |
| 114Cd (KED) | 0.313 ppb             | 17.8 %            |
| 115In (KED) | 52.233 %              | 1.2 %             |
| 133Cs (KED) | 0.353 ppb             | 12.9 %            |
| 138Ba (KED) | 13.040 ppb            | 2.4 %             |
| 139La (KED) | 0.885 ppb             | 3.1 %             |
| 140Ce (KED) | 1.911 ppb             | 1.8 %             |
| 141Pr (KED) | 0.238 ppb             | 12.5 %            |
| 142Nd (KED) | 1.179 ppb             | 1.2 %             |
| 152Sm (KED) | 0.188 ppb             | 13.7 %            |
| 153Eu (KED) | 0.059 ppb             | 45.2 %            |
| 158Gd (KED) | 0.169 ppb             | 15.4 %            |
| 159Tb (KED) | 54.715 %              | 0.9 %             |
| 164Dy (KED) | 0.131 ppb             | 18.4 %            |
| 166Er (KED) | 0.076 ppb             | 34.5 %            |
| 169Tm (KED) | 0.029 ppb             | 98.8 %            |
| 174Yb (KED) | 0.065 ppb             | 40.4 %            |
| 175Lu (KED) | -0.176 ppb            | 26.0 %            |
| 205Tl (KED) | 0.060 ppb             | 46.8 %            |
| 208Pb (KED) | 2.323 ppb             | 2.1 %             |
| 209Bi (KED) | 49.303 %              | 1.5 %             |
| 232Th (KED) | 0.553 ppb             | 31.5 %            |
| 238U (KED)  | 0.543 ppb             | 105.8 %           |

| Category   | Concentration average | Intensity average | Intensity RSD |
|------------|-----------------------|-------------------|---------------|
| 6Li (KED)  | 58.688 %              | 2,592 cps         | 5.1 %         |
| 9Be (KED)  | 0.398 ppb             | 21 cps            | 50.8 %        |
| 11B (KED)  | 41.126 ppb            | 1,365 cps         | 7.9 %         |
| 24Mg (KED) | 1,337.098 ppb         | 246,043 cps       | 4.2 %         |
| 27Al (KED) | 1,603.408 ppb         | 75,635 cps        | 4.0 %         |

| Category    | Concentration average | Intensity average | Intensity RSD |
|-------------|-----------------------|-------------------|---------------|
| 45Sc (KED)  | 59.586 %              | 32,677 cps        | 2.9 %         |
| 51V (KED)   | 3.112 ppb             | 9,198 cps         | 4.1 %         |
| 52Cr (KED)  | 7.111 ppb             | 32,826 cps        | 1.2 %         |
| 55Mn (KED)  | 36.181 ppb            | 82,877 cps        | 2.6 %         |
| 56Fe (KED)  | 1,585.886 ppb         | 6,726,889 cps     | 2.2 %         |
| 58Ni (KED)  | 7.533 ppb             | 44,377 cps        | 1.9 %         |
| 59Co (KED)  | 0.825 ppb             | 7,789 cps         | 9.0 %         |
| 63Cu (KED)  | 11.194 ppb            | 76,925 cps        | 0.3 %         |
| 64Zn (KED)  | 352.871 ppb           | 586,062 cps       | 2.1 %         |
| 69Ga (KED)  | 3.452 ppb             | 7,261 cps         | 4.7 %         |
| 75As (KED)  | 1.794 ppb             | 888 cps           | 7.6 %         |
| 80Se (KED)  | 5.650 ppb             | 1,156 cps         | 3.3 %         |
| 85Rb (KED)  | 3.944 ppb             | 8,234 cps         | 1.4 %         |
| 88Sr (KED)  | 15.182 ppb            | 45,240 cps        | 1.5 %         |
| 89Y (KED)   | 56.900 %              | 320,535 cps       | 0.4 %         |
| 107Ag (KED) | 0.248 ppb             | 5,161 cps         | 15.9 %        |
| 114Cd (KED) | 0.313 ppb             | 2,410 cps         | 16.2 %        |
| 115In (KED) | 52.233 %              | 622,971 cps       | 1.2 %         |
| 133Cs (KED) | 0.353 ppb             | 4,023 cps         | 11.6 %        |
| 138Ba (KED) | 13.040 ppb            | 228,657 cps       | 1.5 %         |
| 139La (KED) | 0.885 ppb             | 32,306 cps        | 3.0 %         |
| 140Ce (KED) | 1.911 ppb             | 94,827 cps        | 1.8 %         |
| 141Pr (KED) | 0.238 ppb             | 12,393 cps        | 12.5 %        |
| 142Nd (KED) | 1.179 ppb             | 25,159 cps        | 1.4 %         |
| 152Sm (KED) | 0.188 ppb             | 3,935 cps         | 14.0 %        |
| 153Eu (KED) | 0.059 ppb             | 2,447 cps         | 45.2 %        |
| 158Gd (KED) | 0.169 ppb             | 5,012 cps         | 15.4 %        |
| 159Tb (KED) | 54.715 %              | 4,148,639 cps     | 0.9 %         |
| 164Dy (KED) | 0.131 ppb             | 4,361 cps         | 18.3 %        |
| 166Er (KED) | 0.076 ppb             | 3,497 cps         | 30.6 %        |
| 169Tm (KED) | 0.029 ppb             | 3,896 cps         | 98.4 %        |
| 174Yb (KED) | 0.065 ppb             | 3,290 cps         | 40.2 %        |
| 175Lu (KED) | -0.176 ppb            | 34,514 cps        | 10.4 %        |
| 205Tl (KED) | 0.060 ppb             | 5,951 cps         | 47.4 %        |
| 208Pb (KED) | 2.323 ppb             | 168,560 cps       | 1.2 %         |
| 209Bi (KED) | 49.303 %              | 3,767,087 cps     | 1.5 %         |
| 232Th (KED) | 0.553 ppb             | 76,463 cps        | 32.3 %        |
| 238U (KED)  | 0.543 ppb             | 92,065 cps        | 106.4 %       |



| Category    | Concentration average | Intensity average | Intensity RSD |
|-------------|-----------------------|-------------------|---------------|
| 45Sc (KED)  | 62.205 %              | 34,113 cps        | 2.3 %         |
| 51V (KED)   | 3.273 ppb             | 10,100 cps        | 3.2 %         |
| 52Cr (KED)  | 5.636 ppb             | 27,185 cps        | 0.8 %         |
| 55Mn (KED)  | 42.398 ppb            | 101,326 cps       | 0.8 %         |
| 56Fe (KED)  | 1,839.148 ppb         | 8,142,750 cps     | 0.8 %         |
| 58Ni (KED)  | 8.420 ppb             | 51,516 cps        | 0.6 %         |
| 59Co (KED)  | 0.936 ppb             | 9,226 cps         | 2.7 %         |
| 63Cu (KED)  | 9.727 ppb             | 66,157 cps        | 0.9 %         |
| 64Zn (KED)  | 396.763 ppb           | 651,113 cps       | 0.9 %         |
| 69Ga (KED)  | 3.079 ppb             | 6,406 cps         | 2.9 %         |
| 75As (KED)  | 1.977 ppb             | 967 cps           | 7.1 %         |
| 80Se (KED)  | 5.678 ppb             | 1,147 cps         | 6.9 %         |
| 85Rb (KED)  | 4.250 ppb             | 8,772 cps         | 2.1 %         |
| 88Sr (KED)  | 17.538 ppb            | 51,644 cps        | 2.1 %         |
| 89Y (KED)   | 56.259 %              | 316,922 cps       | 1.2 %         |
| 107Ag (KED) | 0.212 ppb             | 4,256 cps         | 2.8 %         |
| 114Cd (KED) | 0.335 ppb             | 2,488 cps         | 1.7 %         |
| 115In (KED) | 50.314 %              | 600,088 cps       | 0.6 %         |
| 133Cs (KED) | 0.361 ppb             | 3,976 cps         | 5.7 %         |
| 138Ba (KED) | 10.700 ppb            | 176,280 cps       | 0.9 %         |
| 139La (KED) | 1.030 ppb             | 35,255 cps        | 0.8 %         |
| 140Ce (KED) | 2.272 ppb             | 105,751 cps       | 1.4 %         |
| 141Pr (KED) | 0.258 ppb             | 12,626 cps        | 3.3 %         |
| 142Nd (KED) | 1.386 ppb             | 27,733 cps        | 0.4 %         |
| 152Sm (KED) | 0.199 ppb             | 3,898 cps         | 6.4 %         |
| 153Eu (KED) | 0.046 ppb             | 1,811 cps         | 8.4 %         |
| 158Gd (KED) | 0.179 ppb             | 4,988 cps         | 2.9 %         |
| 159Tb (KED) | 51.336 %              | 3,892,415 cps     | 0.6 %         |
| 164Dy (KED) | 0.129 ppb             | 4,034 cps         | 2.0 %         |
| 166Er (KED) | 0.064 ppb             | 2,819 cps         | 6.0 %         |
| 169Tm (KED) | 0.013 ppb             | 1,650 cps         | 44.1 %        |
| 174Yb (KED) | 0.053 ppb             | 2,544 cps         | 11.1 %        |
| 175Lu (KED) | -0.240 ppb            | 27,699 cps        | 4.2 %         |
| 205Tl (KED) | 0.037 ppb             | 3,218 cps         | 15.4 %        |
| 208Pb (KED) | 2.202 ppb             | 140,482 cps       | 1.7 %         |
| 209Bi (KED) | 43.189 %              | 3,299,875 cps     | 0.7 %         |
| 232Th (KED) | 0.508 ppb             | 61,416 cps        | 0.3 %         |
| 238U (KED)  | 0.290 ppb             | 42,899 cps        | 3.1 %         |

## Sample Summary

Instrument ID: iCAP Q

Analysis index: 8

Analysis name: 29977jian

Analysis started at: 9/23/2021 4:04:51 PM

User name: WINDOWS-UPCI4ER\Administrator

| Category    | Concentration average | Concentration RSD |
|-------------|-----------------------|-------------------|
| 6Li (KED)   | 66.260 %              | 3.9 %             |
| 9Be (KED)   | 0.073 ppb             | 117.0 %           |
| 11B (KED)   | 38.841 ppb            | 6.7 %             |
| 24Mg (KED)  | 1,956.933 ppb         | 2.6 %             |
| 27Al (KED)  | 2,187.085 ppb         | 1.1 %             |
| 45Sc (KED)  | 66.309 %              | 1.8 %             |
| 51V (KED)   | 4.209 ppb             | 2.2 %             |
| 52Cr (KED)  | 5.973 ppb             | 1.6 %             |
| 55Mn (KED)  | 49.622 ppb            | 0.5 %             |
| 56Fe (KED)  | 2,153.767 ppb         | 1.0 %             |
| 58Ni (KED)  | 9.195 ppb             | 1.7 %             |
| 59Co (KED)  | 0.920 ppb             | 4.1 %             |
| 63Cu (KED)  | 16.833 ppb            | 0.4 %             |
| 64Zn (KED)  | 305.326 ppb           | 1.0 %             |
| 69Ga (KED)  | 5.920 ppb             | 0.4 %             |
| 75As (KED)  | 1.831 ppb             | 2.3 %             |
| 80Se (KED)  | 3.370 ppb             | 2.7 %             |
| 85Rb (KED)  | 6.328 ppb             | 2.2 %             |
| 88Sr (KED)  | 27.300 ppb            | 1.1 %             |
| 89Y (KED)   | 57.487 %              | 0.8 %             |
| 107Ag (KED) | 0.198 ppb             | 4.2 %             |
| 114Cd (KED) | 0.121 ppb             | 6.0 %             |
| 115In (KED) | 49.806 %              | 1.0 %             |
| 133Cs (KED) | 0.460 ppb             | 1.5 %             |
| 138Ba (KED) | 20.879 ppb            | 1.3 %             |
| 139La (KED) | 1.590 ppb             | 2.3 %             |
| 140Ce (KED) | 3.340 ppb             | 1.0 %             |
| 141Pr (KED) | 0.387 ppb             | 1.9 %             |
| 142Nd (KED) | 2.011 ppb             | 2.0 %             |
| 152Sm (KED) | 0.280 ppb             | 0.4 %             |
| 153Eu (KED) | 0.061 ppb             | 6.6 %             |
| 158Gd (KED) | 0.258 ppb             | 1.9 %             |
| 159Tb (KED) | 50.085 %              | 0.9 %             |
| 164Dy (KED) | 0.188 ppb             | 2.2 %             |
| 166Er (KED) | 0.095 ppb             | 3.4 %             |
| 169Tm (KED) | 0.016 ppb             | 7.4 %             |
| 174Yb (KED) | 0.076 ppb             | 4.6 %             |
| 175Lu (KED) | -0.271 ppb            | 4.7 %             |
| 205Tl (KED) | 0.043 ppb             | 1.4 %             |
| 208Pb (KED) | 2.765 ppb             | 1.7 %             |
| 209Bi (KED) | 40.474 %              | 1.7 %             |
| 232Th (KED) | 0.788 ppb             | 2.0 %             |
| 238U (KED)  | 0.292 ppb             | 0.9 %             |

| Category   | Concentration average | Intensity average | Intensity RSD |
|------------|-----------------------|-------------------|---------------|
| 6Li (KED)  | 66.260 %              | 2,927 cps         | 3.9 %         |
| 9Be (KED)  | 0.073 ppb             | 4 cps             | 114.6 %       |
| 11B (KED)  | 38.841 ppb            | 1,471 cps         | 9.4 %         |
| 24Mg (KED) | 1,956.933 ppb         | 406,354 cps       | 2.2 %         |
| 27Al (KED) | 2,187.085 ppb         | 114,753 cps       | 1.0 %         |



## Sample Summary

Instrument ID: iCAP Q

Analysis index: 9

Analysis name: 1jian

Analysis started at: 9/23/2021 4:08:26 PM

User name: WINDOWS-UPCI4ER\Administrator

| Category    | Concentration average | Concentration RSD |
|-------------|-----------------------|-------------------|
| 6Li (KED)   | 64.977 %              | 1.2 %             |
| 9Be (KED)   | 0.130 ppb             | 65.1 %            |
| 11B (KED)   | 37.584 ppb            | 9.4 %             |
| 24Mg (KED)  | 2,217.675 ppb         | 3.3 %             |
| 27Al (KED)  | 2,080.141 ppb         | 1.1 %             |
| 45Sc (KED)  | 66.462 %              | 1.7 %             |
| 51V (KED)   | 4.332 ppb             | 0.7 %             |
| 52Cr (KED)  | 6.470 ppb             | 0.1 %             |
| 55Mn (KED)  | 57.952 ppb            | 0.7 %             |
| 56Fe (KED)  | 2,556.366 ppb         | 0.6 %             |
| 58Ni (KED)  | 11.734 ppb            | 8.5 %             |
| 59Co (KED)  | 1.190 ppb             | 1.5 %             |
| 63Cu (KED)  | 10.999 ppb            | 1.3 %             |
| 64Zn (KED)  | 344.238 ppb           | 1.1 %             |
| 69Ga (KED)  | 5.865 ppb             | 3.7 %             |
| 75As (KED)  | 2.023 ppb             | 3.5 %             |
| 80Se (KED)  | 4.231 ppb             | 20.4 %            |
| 85Rb (KED)  | 6.652 ppb             | 0.2 %             |
| 88Sr (KED)  | 27.265 ppb            | 0.9 %             |
| 89Y (KED)   | 57.237 %              | 0.6 %             |
| 107Ag (KED) | 0.171 ppb             | 5.7 %             |
| 114Cd (KED) | 0.157 ppb             | 4.2 %             |
| 115In (KED) | 47.749 %              | 1.1 %             |
| 133Cs (KED) | 0.475 ppb             | 5.2 %             |
| 138Ba (KED) | 20.284 ppb            | 1.5 %             |
| 139La (KED) | 1.794 ppb             | 0.8 %             |
| 140Ce (KED) | 3.729 ppb             | 0.6 %             |
| 141Pr (KED) | 0.432 ppb             | 0.4 %             |
| 142Nd (KED) | 2.272 ppb             | 0.5 %             |
| 152Sm (KED) | 0.320 ppb             | 3.1 %             |
| 153Eu (KED) | 0.064 ppb             | 1.9 %             |
| 158Gd (KED) | 0.295 ppb             | 2.8 %             |
| 159Tb (KED) | 48.340 %              | 0.3 %             |
| 164Dy (KED) | 0.210 ppb             | 3.1 %             |
| 166Er (KED) | 0.104 ppb             | 2.9 %             |
| 169Tm (KED) | 0.014 ppb             | 4.5 %             |
| 174Yb (KED) | 0.078 ppb             | 4.0 %             |
| 175Lu (KED) | -0.279 ppb            | 4.5 %             |
| 205Tl (KED) | 0.038 ppb             | 5.3 %             |
| 208Pb (KED) | 2.957 ppb             | 1.8 %             |
| 209Bi (KED) | 38.674 %              | 0.6 %             |
| 232Th (KED) | 0.735 ppb             | 0.9 %             |
| 238U (KED)  | 0.360 ppb             | 1.6 %             |

| Category   | Concentration average | Intensity average | Intensity RSD |
|------------|-----------------------|-------------------|---------------|
| 6Li (KED)  | 64.977 %              | 2,870 cps         | 1.2 %         |
| 9Be (KED)  | 0.130 ppb             | 8 cps             | 65.5 %        |
| 11B (KED)  | 37.584 ppb            | 1,400 cps         | 6.8 %         |
| 24Mg (KED) | 2,217.675 ppb         | 451,708 cps       | 2.3 %         |
| 27Al (KED) | 2,080.141 ppb         | 109,423 cps       | 2.8 %         |

| Category    | Concentration average | Intensity average | Intensity RSD |
|-------------|-----------------------|-------------------|---------------|
| 45Sc (KED)  | 66.462 %              | 36,448 cps        | 1.7 %         |
| 51V (KED)   | 4.332 ppb             | 14,294 cps        | 2.2 %         |
| 52Cr (KED)  | 6.470 ppb             | 33,343 cps        | 1.7 %         |
| 55Mn (KED)  | 57.952 ppb            | 148,003 cps       | 1.0 %         |
| 56Fe (KED)  | 2,556.366 ppb         | 12,094,745 cps    | 1.7 %         |
| 58Ni (KED)  | 11.734 ppb            | 75,784 cps        | 9.6 %         |
| 59Co (KED)  | 1.190 ppb             | 12,520 cps        | 2.0 %         |
| 63Cu (KED)  | 10.999 ppb            | 76,040 cps        | 0.9 %         |
| 64Zn (KED)  | 344.238 ppb           | 575,164 cps       | 0.6 %         |
| 69Ga (KED)  | 5.865 ppb             | 12,376 cps        | 3.3 %         |
| 75As (KED)  | 2.023 ppb             | 1,007 cps         | 4.0 %         |
| 80Se (KED)  | 4.231 ppb             | 954 cps           | 13.8 %        |
| 85Rb (KED)  | 6.652 ppb             | 13,962 cps        | 0.8 %         |
| 88Sr (KED)  | 27.265 ppb            | 81,605 cps        | 1.3 %         |
| 89Y (KED)   | 57.237 %              | 322,432 cps       | 0.6 %         |
| 107Ag (KED) | 0.171 ppb             | 3,263 cps         | 4.7 %         |
| 114Cd (KED) | 0.157 ppb             | 1,134 cps         | 4.9 %         |
| 115In (KED) | 47.749 %              | 569,492 cps       | 1.1 %         |
| 133Cs (KED) | 0.475 ppb             | 4,945 cps         | 4.1 %         |
| 138Ba (KED) | 20.284 ppb            | 313,622 cps       | 1.3 %         |
| 139La (KED) | 1.794 ppb             | 57,777 cps        | 0.6 %         |
| 140Ce (KED) | 3.729 ppb             | 163,288 cps       | 0.6 %         |
| 141Pr (KED) | 0.432 ppb             | 19,867 cps        | 0.4 %         |
| 142Nd (KED) | 2.272 ppb             | 42,781 cps        | 0.3 %         |
| 152Sm (KED) | 0.320 ppb             | 5,895 cps         | 2.9 %         |
| 153Eu (KED) | 0.064 ppb             | 2,350 cps         | 2.0 %         |
| 158Gd (KED) | 0.295 ppb             | 7,737 cps         | 2.8 %         |
| 159Tb (KED) | 48.340 %              | 3,665,272 cps     | 0.3 %         |
| 164Dy (KED) | 0.210 ppb             | 6,180 cps         | 3.0 %         |
| 166Er (KED) | 0.104 ppb             | 4,096 cps         | 2.8 %         |
| 169Tm (KED) | 0.014 ppb             | 1,689 cps         | 4.4 %         |
| 174Yb (KED) | 0.078 ppb             | 3,507 cps         | 4.1 %         |
| 175Lu (KED) | -0.279 ppb            | 23,388 cps        | 3.5 %         |
| 205Tl (KED) | 0.038 ppb             | 2,976 cps         | 5.3 %         |
| 208Pb (KED) | 2.957 ppb             | 166,002 cps       | 1.6 %         |
| 209Bi (KED) | 38.674 %              | 2,954,898 cps     | 0.6 %         |
| 232Th (KED) | 0.735 ppb             | 79,477 cps        | 1.2 %         |
| 238U (KED)  | 0.360 ppb             | 47,600 cps        | 1.2 %         |

## Sample Summary

Instrument ID: iCAP Q

Analysis index: 10

Analysis name: 28737jian

Analysis started at: 9/23/2021 4:11:57 PM

User name: WINDOWS-UPCI4ER\Administrator

| Category    | Concentration average | Concentration RSD |
|-------------|-----------------------|-------------------|
| 6Li (KED)   | 68.852 %              | 5.1 %             |
| 9Be (KED)   | 0.090 ppb             | 74.8 %            |
| 11B (KED)   | 39.310 ppb            | 8.8 %             |
| 24Mg (KED)  | 1,523.933 ppb         | 5.5 %             |
| 27Al (KED)  | 1,808.910 ppb         | 3.2 %             |
| 45Sc (KED)  | 67.858 %              | 1.4 %             |
| 51V (KED)   | 3.395 ppb             | 2.0 %             |
| 52Cr (KED)  | 4.833 ppb             | 2.4 %             |
| 55Mn (KED)  | 39.985 ppb            | 1.6 %             |
| 56Fe (KED)  | 1,723.445 ppb         | 1.8 %             |
| 58Ni (KED)  | 7.396 ppb             | 2.7 %             |
| 59Co (KED)  | 0.774 ppb             | 0.9 %             |
| 63Cu (KED)  | 11.199 ppb            | 0.7 %             |
| 64Zn (KED)  | 348.095 ppb           | 0.4 %             |
| 69Ga (KED)  | 4.537 ppb             | 5.4 %             |
| 75As (KED)  | 1.770 ppb             | 14.0 %            |
| 80Se (KED)  | 3.844 ppb             | 9.8 %             |
| 85Rb (KED)  | 6.044 ppb             | 0.7 %             |
| 88Sr (KED)  | 18.341 ppb            | 0.8 %             |
| 89Y (KED)   | 57.303 %              | 1.4 %             |
| 107Ag (KED) | 0.119 ppb             | 1.3 %             |
| 114Cd (KED) | 0.106 ppb             | 8.8 %             |
| 115In (KED) | 49.221 %              | 0.8 %             |
| 133Cs (KED) | 0.371 ppb             | 2.0 %             |
| 138Ba (KED) | 15.636 ppb            | 2.4 %             |
| 139La (KED) | 1.332 ppb             | 2.9 %             |
| 140Ce (KED) | 2.887 ppb             | 1.1 %             |
| 141Pr (KED) | 0.317 ppb             | 4.1 %             |
| 142Nd (KED) | 1.704 ppb             | 1.7 %             |
| 152Sm (KED) | 0.224 ppb             | 3.3 %             |
| 153Eu (KED) | 0.045 ppb             | 6.0 %             |
| 158Gd (KED) | 0.207 ppb             | 2.0 %             |
| 159Tb (KED) | 49.157 %              | 1.2 %             |
| 164Dy (KED) | 0.146 ppb             | 1.8 %             |
| 166Er (KED) | 0.071 ppb             | 7.8 %             |
| 169Tm (KED) | 0.010 ppb             | 9.5 %             |
| 174Yb (KED) | 0.055 ppb             | 2.8 %             |
| 175Lu (KED) | -0.315 ppb            | 0.8 %             |
| 205Tl (KED) | 0.033 ppb             | 8.9 %             |
| 208Pb (KED) | 2.045 ppb             | 1.9 %             |
| 209Bi (KED) | 39.365 %              | 1.7 %             |
| 232Th (KED) | 0.488 ppb             | 2.3 %             |
| 238U (KED)  | 0.249 ppb             | 4.0 %             |

| Category   | Concentration average | Intensity average | Intensity RSD |
|------------|-----------------------|-------------------|---------------|
| 6Li (KED)  | 68.852 %              | 3,041 cps         | 5.1 %         |
| 9Be (KED)  | 0.090 ppb             | 6 cps             | 69.3 %        |
| 11B (KED)  | 39.310 ppb            | 1,539 cps         | 3.9 %         |
| 24Mg (KED) | 1,523.933 ppb         | 328,439 cps       | 0.5 %         |
| 27Al (KED) | 1,808.910 ppb         | 97,123 cps        | 1.8 %         |

| Category    | Concentration average | Intensity average | Intensity RSD |
|-------------|-----------------------|-------------------|---------------|
| 45Sc (KED)  | 67.858 %              | 37,213 cps        | 1.4 %         |
| 51V (KED)   | 3.395 ppb             | 11,436 cps        | 1.2 %         |
| 52Cr (KED)  | 4.833 ppb             | 25,446 cps        | 1.3 %         |
| 55Mn (KED)  | 39.985 ppb            | 104,287 cps       | 0.8 %         |
| 56Fe (KED)  | 1,723.445 ppb         | 8,324,836 cps     | 0.7 %         |
| 58Ni (KED)  | 7.396 ppb             | 49,683 cps        | 1.9 %         |
| 59Co (KED)  | 0.774 ppb             | 8,341 cps         | 0.5 %         |
| 63Cu (KED)  | 11.199 ppb            | 77,505 cps        | 1.9 %         |
| 64Zn (KED)  | 348.095 ppb           | 582,246 cps       | 1.0 %         |
| 69Ga (KED)  | 4.537 ppb             | 9,591 cps         | 4.1 %         |
| 75As (KED)  | 1.770 ppb             | 881 cps           | 12.5 %        |
| 80Se (KED)  | 3.844 ppb             | 898 cps           | 5.1 %         |
| 85Rb (KED)  | 6.044 ppb             | 12,701 cps        | 0.8 %         |
| 88Sr (KED)  | 18.341 ppb            | 55,003 cps        | 1.0 %         |
| 89Y (KED)   | 57.303 %              | 322,805 cps       | 1.4 %         |
| 107Ag (KED) | 0.119 ppb             | 2,349 cps         | 0.8 %         |
| 114Cd (KED) | 0.106 ppb             | 807 cps           | 7.5 %         |
| 115In (KED) | 49.221 %              | 587,040 cps       | 0.8 %         |
| 133Cs (KED) | 0.371 ppb             | 3,987 cps         | 1.5 %         |
| 138Ba (KED) | 15.636 ppb            | 246,073 cps       | 1.3 %         |
| 139La (KED) | 1.332 ppb             | 43,626 cps        | 2.7 %         |
| 140Ce (KED) | 2.887 ppb             | 128,610 cps       | 1.2 %         |
| 141Pr (KED) | 0.317 ppb             | 14,847 cps        | 3.1 %         |
| 142Nd (KED) | 1.704 ppb             | 32,634 cps        | 0.5 %         |
| 152Sm (KED) | 0.224 ppb             | 4,198 cps         | 4.1 %         |
| 153Eu (KED) | 0.045 ppb             | 1,687 cps         | 4.8 %         |
| 158Gd (KED) | 0.207 ppb             | 5,509 cps         | 0.8 %         |
| 159Tb (KED) | 49.157 %              | 3,727,213 cps     | 1.2 %         |
| 164Dy (KED) | 0.146 ppb             | 4,367 cps         | 1.3 %         |
| 166Er (KED) | 0.071 ppb             | 2,941 cps         | 5.8 %         |
| 169Tm (KED) | 0.010 ppb             | 1,262 cps         | 10.0 %        |
| 174Yb (KED) | 0.055 ppb             | 2,526 cps         | 3.8 %         |
| 175Lu (KED) | -0.315 ppb            | 21,276 cps        | 0.4 %         |
| 205Tl (KED) | 0.033 ppb             | 2,581 cps         | 7.2 %         |
| 208Pb (KED) | 2.045 ppb             | 119,523 cps       | 0.8 %         |
| 209Bi (KED) | 39.365 %              | 3,007,717 cps     | 1.7 %         |
| 232Th (KED) | 0.488 ppb             | 53,747 cps        | 0.6 %         |
| 238U (KED)  | 0.249 ppb             | 33,530 cps        | 2.3 %         |

## Sample Summary

Instrument ID: iCAP Q

Analysis index: 11

Analysis name: 001jian

Analysis started at: 9/23/2021 4:15:42 PM

User name: WINDOWS-UPCI4ER\Administrator

| Category    | Concentration average | Concentration RSD |
|-------------|-----------------------|-------------------|
| 6Li (KED)   | 69.028 %              | 1.6 %             |
| 9Be (KED)   | 0.054 ppb             | 173.2 %           |
| 11B (KED)   | 14.113 ppb            | 9.7 %             |
| 24Mg (KED)  | 1,813.351 ppb         | 2.8 %             |
| 27Al (KED)  | 765.019 ppb           | 3.1 %             |
| 45Sc (KED)  | 65.074 %              | 0.8 %             |
| 51V (KED)   | 1.598 ppb             | 2.1 %             |
| 52Cr (KED)  | 3.082 ppb             | 3.0 %             |
| 55Mn (KED)  | 27.823 ppb            | 1.1 %             |
| 56Fe (KED)  | 880.202 ppb           | 1.6 %             |
| 58Ni (KED)  | 4.454 ppb             | 0.9 %             |
| 59Co (KED)  | 0.464 ppb             | 1.2 %             |
| 63Cu (KED)  | 15.865 ppb            | 1.3 %             |
| 64Zn (KED)  | 284.556 ppb           | 0.9 %             |
| 69Ga (KED)  | 2.372 ppb             | 2.7 %             |
| 75As (KED)  | 1.458 ppb             | 5.0 %             |
| 80Se (KED)  | 3.158 ppb             | 17.3 %            |
| 85Rb (KED)  | 2.304 ppb             | 2.9 %             |
| 88Sr (KED)  | 17.719 ppb            | 0.2 %             |
| 89Y (KED)   | 55.766 %              | 1.2 %             |
| 107Ag (KED) | 0.202 ppb             | 2.9 %             |
| 114Cd (KED) | 0.104 ppb             | 9.0 %             |
| 115In (KED) | 49.131 %              | 0.3 %             |
| 133Cs (KED) | 0.165 ppb             | 2.8 %             |
| 138Ba (KED) | 8.477 ppb             | 2.7 %             |
| 139La (KED) | 0.605 ppb             | 0.6 %             |
| 140Ce (KED) | 1.286 ppb             | 0.3 %             |
| 141Pr (KED) | 0.151 ppb             | 2.6 %             |
| 142Nd (KED) | 0.787 ppb             | 2.0 %             |
| 152Sm (KED) | 0.108 ppb             | 9.8 %             |
| 153Eu (KED) | 0.023 ppb             | 21.4 %            |
| 158Gd (KED) | 0.100 ppb             | 2.6 %             |
| 159Tb (KED) | 48.700 %              | 1.1 %             |
| 164Dy (KED) | 0.070 ppb             | 1.6 %             |
| 166Er (KED) | 0.035 ppb             | 1.8 %             |
| 169Tm (KED) | 0.005 ppb             | 17.5 %            |
| 174Yb (KED) | 0.028 ppb             | 6.9 %             |
| 175Lu (KED) | -0.306 ppb            | 4.3 %             |
| 205Tl (KED) | 0.017 ppb             | 6.4 %             |
| 208Pb (KED) | 1.884 ppb             | 1.3 %             |
| 209Bi (KED) | 40.051 %              | 0.9 %             |
| 232Th (KED) | 0.234 ppb             | 2.1 %             |
| 238U (KED)  | 0.167 ppb             | 3.5 %             |

| Category   | Concentration average | Intensity average | Intensity RSD |
|------------|-----------------------|-------------------|---------------|
| 6Li (KED)  | 69.028 %              | 3,049 cps         | 1.6 %         |
| 9Be (KED)  | 0.054 ppb             | 3 cps             | 173.2 %       |
| 11B (KED)  | 14.113 ppb            | 697 cps           | 7.1 %         |
| 24Mg (KED) | 1,813.351 ppb         | 392,401 cps       | 1.5 %         |
| 27Al (KED) | 765.019 ppb           | 39,443 cps        | 3.0 %         |

| Category    | Concentration average | Intensity average | Intensity RSD |
|-------------|-----------------------|-------------------|---------------|
| 45Sc (KED)  | 65.074 %              | 35,687 cps        | 0.8 %         |
| 51V (KED)   | 1.598 ppb             | 5,166 cps         | 1.7 %         |
| 52Cr (KED)  | 3.082 ppb             | 15,590 cps        | 2.3 %         |
| 55Mn (KED)  | 27.823 ppb            | 69,629 cps        | 1.8 %         |
| 56Fe (KED)  | 880.202 ppb           | 4,079,202 cps     | 1.9 %         |
| 58Ni (KED)  | 4.454 ppb             | 29,679 cps        | 1.0 %         |
| 59Co (KED)  | 0.464 ppb             | 4,826 cps         | 1.8 %         |
| 63Cu (KED)  | 15.865 ppb            | 106,626 cps       | 0.9 %         |
| 64Zn (KED)  | 284.556 ppb           | 463,811 cps       | 1.5 %         |
| 69Ga (KED)  | 2.372 ppb             | 4,904 cps         | 3.6 %         |
| 75As (KED)  | 1.458 ppb             | 709 cps           | 5.7 %         |
| 80Se (KED)  | 3.158 ppb             | 776 cps           | 9.5 %         |
| 85Rb (KED)  | 2.304 ppb             | 4,720 cps         | 2.9 %         |
| 88Sr (KED)  | 17.719 ppb            | 51,723 cps        | 1.3 %         |
| 89Y (KED)   | 55.766 %              | 314,149 cps       | 1.2 %         |
| 107Ag (KED) | 0.202 ppb             | 3,967 cps         | 3.0 %         |
| 114Cd (KED) | 0.104 ppb             | 786 cps           | 8.3 %         |
| 115In (KED) | 49.131 %              | 585,970 cps       | 0.3 %         |
| 133Cs (KED) | 0.165 ppb             | 1,785 cps         | 2.7 %         |
| 138Ba (KED) | 8.477 ppb             | 132,710 cps       | 1.8 %         |
| 139La (KED) | 0.605 ppb             | 19,684 cps        | 1.2 %         |
| 140Ce (KED) | 1.286 ppb             | 56,877 cps        | 1.1 %         |
| 141Pr (KED) | 0.151 ppb             | 7,008 cps         | 1.8 %         |
| 142Nd (KED) | 0.787 ppb             | 14,961 cps        | 1.6 %         |
| 152Sm (KED) | 0.108 ppb             | 2,006 cps         | 9.5 %         |
| 153Eu (KED) | 0.023 ppb             | 841 cps           | 21.8 %        |
| 158Gd (KED) | 0.100 ppb             | 2,633 cps         | 3.6 %         |
| 159Tb (KED) | 48.700 %              | 3,692,552 cps     | 1.1 %         |
| 164Dy (KED) | 0.070 ppb             | 2,090 cps         | 1.7 %         |
| 166Er (KED) | 0.035 ppb             | 1,635 cps         | 2.0 %         |
| 169Tm (KED) | 0.005 ppb             | 604 cps           | 17.7 %        |
| 174Yb (KED) | 0.028 ppb             | 1,283 cps         | 7.6 %         |
| 175Lu (KED) | -0.306 ppb            | 21,676 cps        | 5.3 %         |
| 205Tl (KED) | 0.017 ppb             | 1,420 cps         | 7.1 %         |
| 208Pb (KED) | 1.884 ppb             | 112,741 cps       | 0.5 %         |
| 209Bi (KED) | 40.051 %              | 3,060,172 cps     | 0.9 %         |
| 232Th (KED) | 0.234 ppb             | 26,340 cps        | 1.4 %         |
| 238U (KED)  | 0.167 ppb             | 22,943 cps        | 2.7 %         |

## Sample Summary

Instrument ID: iCAP Q

Analysis index: 12

Analysis name: 0955jian

Analysis started at: 9/23/2021 4:19:13 PM

User name: WINDOWS-UPCI4ER\Administrator

| Category    | Concentration average | Concentration RSD |
|-------------|-----------------------|-------------------|
| 6Li (KED)   | 63.292 %              | 4.7 %             |
| 9Be (KED)   | 0.075 ppb             | 115.7 %           |
| 11B (KED)   | 14.928 ppb            | 6.3 %             |
| 24Mg (KED)  | 1,581.557 ppb         | 4.7 %             |
| 27Al (KED)  | 1,067.820 ppb         | 0.7 %             |
| 45Sc (KED)  | 63.296 %              | 0.8 %             |
| 51V (KED)   | 1.920 ppb             | 1.8 %             |
| 52Cr (KED)  | 2.695 ppb             | 1.1 %             |
| 55Mn (KED)  | 27.968 ppb            | 0.8 %             |
| 56Fe (KED)  | 1,042.845 ppb         | 1.6 %             |
| 58Ni (KED)  | 4.572 ppb             | 2.0 %             |
| 59Co (KED)  | 0.500 ppb             | 4.9 %             |
| 63Cu (KED)  | 15.602 ppb            | 1.7 %             |
| 64Zn (KED)  | 327.618 ppb           | 0.5 %             |
| 69Ga (KED)  | 2.596 ppb             | 2.2 %             |
| 75As (KED)  | 1.235 ppb             | 3.1 %             |
| 80Se (KED)  | 3.285 ppb             | 19.8 %            |
| 85Rb (KED)  | 3.077 ppb             | 3.1 %             |
| 88Sr (KED)  | 15.953 ppb            | 1.6 %             |
| 89Y (KED)   | 54.898 %              | 1.2 %             |
| 107Ag (KED) | 0.107 ppb             | 8.0 %             |
| 114Cd (KED) | 0.080 ppb             | 8.6 %             |
| 115In (KED) | 48.209 %              | 1.4 %             |
| 133Cs (KED) | 0.226 ppb             | 5.5 %             |
| 138Ba (KED) | 8.649 ppb             | 3.6 %             |
| 139La (KED) | 0.660 ppb             | 1.3 %             |
| 140Ce (KED) | 1.380 ppb             | 2.6 %             |
| 141Pr (KED) | 0.158 ppb             | 3.1 %             |
| 142Nd (KED) | 0.852 ppb             | 2.2 %             |
| 152Sm (KED) | 0.116 ppb             | 2.8 %             |
| 153Eu (KED) | 0.025 ppb             | 1.4 %             |
| 158Gd (KED) | 0.103 ppb             | 0.4 %             |
| 159Tb (KED) | 48.685 %              | 3.4 %             |
| 164Dy (KED) | 0.074 ppb             | 7.5 %             |
| 166Er (KED) | 0.040 ppb             | 6.0 %             |
| 169Tm (KED) | 0.005 ppb             | 0.8 %             |
| 174Yb (KED) | 0.028 ppb             | 4.8 %             |
| 175Lu (KED) | -0.332 ppb            | 2.9 %             |
| 205Tl (KED) | 0.021 ppb             | 4.9 %             |
| 208Pb (KED) | 1.603 ppb             | 2.5 %             |
| 209Bi (KED) | 40.099 %              | 0.4 %             |
| 232Th (KED) | 0.291 ppb             | 1.6 %             |
| 238U (KED)  | 0.150 ppb             | 2.9 %             |

| Category   | Concentration average | Intensity average | Intensity RSD |
|------------|-----------------------|-------------------|---------------|
| 6Li (KED)  | 63.292 %              | 2,796 cps         | 4.7 %         |
| 9Be (KED)  | 0.075 ppb             | 4 cps             | 114.6 %       |
| 11B (KED)  | 14.928 ppb            | 663 cps           | 4.1 %         |
| 24Mg (KED) | 1,581.557 ppb         | 313,466 cps       | 0.9 %         |
| 27Al (KED) | 1,067.820 ppb         | 53,523 cps        | 0.5 %         |

| Category    | Concentration average | Intensity average | Intensity RSD |
|-------------|-----------------------|-------------------|---------------|
| 45Sc (KED)  | 63.296 %              | 34,712 cps        | 0.8 %         |
| 51V (KED)   | 1.920 ppb             | 6,036 cps         | 1.1 %         |
| 52Cr (KED)  | 2.695 ppb             | 13,269 cps        | 1.8 %         |
| 55Mn (KED)  | 27.968 ppb            | 68,074 cps        | 0.5 %         |
| 56Fe (KED)  | 1,042.845 ppb         | 4,700,035 cps     | 0.9 %         |
| 58Ni (KED)  | 4.572 ppb             | 29,565 cps        | 1.0 %         |
| 59Co (KED)  | 0.500 ppb             | 5,050 cps         | 4.2 %         |
| 63Cu (KED)  | 15.602 ppb            | 103,230 cps       | 0.6 %         |
| 64Zn (KED)  | 327.618 ppb           | 525,192 cps       | 1.0 %         |
| 69Ga (KED)  | 2.596 ppb             | 5,281 cps         | 3.4 %         |
| 75As (KED)  | 1.235 ppb             | 592 cps           | 3.4 %         |
| 80Se (KED)  | 3.285 ppb             | 781 cps           | 10.7 %        |
| 85Rb (KED)  | 3.077 ppb             | 6,199 cps         | 2.6 %         |
| 88Sr (KED)  | 15.953 ppb            | 45,852 cps        | 1.1 %         |
| 89Y (KED)   | 54.898 %              | 309,259 cps       | 1.2 %         |
| 107Ag (KED) | 0.107 ppb             | 2,069 cps         | 6.6 %         |
| 114Cd (KED) | 0.080 ppb             | 603 cps           | 8.3 %         |
| 115In (KED) | 48.209 %              | 574,982 cps       | 1.4 %         |
| 133Cs (KED) | 0.226 ppb             | 2,394 cps         | 5.1 %         |
| 138Ba (KED) | 8.649 ppb             | 135,251 cps       | 0.2 %         |
| 139La (KED) | 0.660 ppb             | 21,432 cps        | 2.4 %         |
| 140Ce (KED) | 1.380 ppb             | 60,981 cps        | 1.8 %         |
| 141Pr (KED) | 0.158 ppb             | 7,343 cps         | 5.7 %         |
| 142Nd (KED) | 0.852 ppb             | 16,178 cps        | 2.0 %         |
| 152Sm (KED) | 0.116 ppb             | 2,166 cps         | 3.5 %         |
| 153Eu (KED) | 0.025 ppb             | 948 cps           | 2.9 %         |
| 158Gd (KED) | 0.103 ppb             | 2,734 cps         | 3.5 %         |
| 159Tb (KED) | 48.685 %              | 3,691,394 cps     | 3.4 %         |
| 164Dy (KED) | 0.074 ppb             | 2,199 cps         | 7.6 %         |
| 166Er (KED) | 0.040 ppb             | 1,821 cps         | 2.1 %         |
| 169Tm (KED) | 0.005 ppb             | 591 cps           | 4.2 %         |
| 174Yb (KED) | 0.028 ppb             | 1,271 cps         | 3.7 %         |
| 175Lu (KED) | -0.332 ppb            | 19,862 cps        | 0.7 %         |
| 205Tl (KED) | 0.021 ppb             | 1,730 cps         | 4.5 %         |
| 208Pb (KED) | 1.603 ppb             | 97,415 cps        | 2.0 %         |
| 209Bi (KED) | 40.099 %              | 3,063,810 cps     | 0.4 %         |
| 232Th (KED) | 0.291 ppb             | 32,735 cps        | 1.4 %         |
| 238U (KED)  | 0.150 ppb             | 20,606 cps        | 2.8 %         |

## Sample Summary

Instrument ID: iCAP Q

Analysis index: 13

Analysis name: 028727jian

Analysis started at: 9/23/2021 4:22:56 PM

User name: WINDOWS-UPCI4ER\Administrator

| Category    | Concentration average | Concentration RSD |
|-------------|-----------------------|-------------------|
| 6Li (KED)   | 66.889 %              | 3.7 %             |
| 9Be (KED)   | 0.036 ppb             | 86.7 %            |
| 11B (KED)   | 9.313 ppb             | 21.8 %            |
| 24Mg (KED)  | 1,334.923 ppb         | 4.1 %             |
| 27Al (KED)  | 883.169 ppb           | 1.4 %             |
| 45Sc (KED)  | 64.718 %              | 0.7 %             |
| 51V (KED)   | 1.731 ppb             | 2.1 %             |
| 52Cr (KED)  | 2.768 ppb             | 1.4 %             |
| 55Mn (KED)  | 25.288 ppb            | 0.5 %             |
| 56Fe (KED)  | 1,044.909 ppb         | 3.2 %             |
| 58Ni (KED)  | 4.550 ppb             | 0.9 %             |
| 59Co (KED)  | 0.501 ppb             | 2.3 %             |
| 63Cu (KED)  | 12.100 ppb            | 1.5 %             |
| 64Zn (KED)  | 302.030 ppb           | 0.9 %             |
| 69Ga (KED)  | 2.305 ppb             | 3.6 %             |
| 75As (KED)  | 1.057 ppb             | 12.8 %            |
| 80Se (KED)  | 2.762 ppb             | 21.8 %            |
| 85Rb (KED)  | 3.147 ppb             | 3.3 %             |
| 88Sr (KED)  | 15.040 ppb            | 0.7 %             |
| 89Y (KED)   | 56.306 %              | 1.8 %             |
| 107Ag (KED) | 0.223 ppb             | 3.4 %             |
| 114Cd (KED) | 0.078 ppb             | 3.4 %             |
| 115In (KED) | 49.231 %              | 0.9 %             |
| 133Cs (KED) | 0.190 ppb             | 4.6 %             |
| 138Ba (KED) | 8.377 ppb             | 1.6 %             |
| 139La (KED) | 0.737 ppb             | 2.3 %             |
| 140Ce (KED) | 1.578 ppb             | 2.2 %             |
| 141Pr (KED) | 0.173 ppb             | 2.5 %             |
| 142Nd (KED) | 0.946 ppb             | 1.7 %             |
| 152Sm (KED) | 0.132 ppb             | 5.8 %             |
| 153Eu (KED) | 0.026 ppb             | 2.0 %             |
| 158Gd (KED) | 0.124 ppb             | 3.0 %             |
| 159Tb (KED) | 49.836 %              | 1.5 %             |
| 164Dy (KED) | 0.083 ppb             | 2.4 %             |
| 166Er (KED) | 0.040 ppb             | 8.3 %             |
| 169Tm (KED) | 0.005 ppb             | 5.5 %             |
| 174Yb (KED) | 0.031 ppb             | 2.1 %             |
| 175Lu (KED) | -0.333 ppb            | 3.8 %             |
| 205Tl (KED) | 0.021 ppb             | 4.6 %             |
| 208Pb (KED) | 1.674 ppb             | 4.2 %             |
| 209Bi (KED) | 40.864 %              | 2.4 %             |
| 232Th (KED) | 0.293 ppb             | 2.0 %             |
| 238U (KED)  | 0.163 ppb             | 2.6 %             |

| Category   | Concentration average | Intensity average | Intensity RSD |
|------------|-----------------------|-------------------|---------------|
| 6Li (KED)  | 66.889 %              | 2,955 cps         | 3.7 %         |
| 9Be (KED)  | 0.036 ppb             | 2 cps             | 86.6 %        |
| 11B (KED)  | 9.313 ppb             | 517 cps           | 9.5 %         |
| 24Mg (KED) | 1,334.923 ppb         | 279,787 cps       | 0.8 %         |
| 27Al (KED) | 883.169 ppb           | 45,280 cps        | 2.1 %         |



## Sample Summary

Instrument ID: iCAP Q

Analysis index: 14

Analysis name: 024982jian

Analysis started at: 9/23/2021 4:26:26 PM

User name: WINDOWS-UPCI4ER\Administrator

| Category    | Concentration average | Concentration RSD |
|-------------|-----------------------|-------------------|
| 6Li (KED)   | 63.518 %              | 3.4 %             |
| 9Be (KED)   | 0.056 ppb             | 98.1 %            |
| 11B (KED)   | 43.408 ppb            | 6.6 %             |
| 24Mg (KED)  | 1,313.409 ppb         | 3.1 %             |
| 27Al (KED)  | 1,071.460 ppb         | 3.7 %             |
| 45Sc (KED)  | 60.894 %              | 1.5 %             |
| 51V (KED)   | 2.129 ppb             | 4.1 %             |
| 52Cr (KED)  | 3.950 ppb             | 4.1 %             |
| 55Mn (KED)  | 30.687 ppb            | 1.5 %             |
| 56Fe (KED)  | 1,203.594 ppb         | 2.3 %             |
| 58Ni (KED)  | 5.422 ppb             | 2.7 %             |
| 59Co (KED)  | 0.634 ppb             | 3.8 %             |
| 63Cu (KED)  | 14.218 ppb            | 0.3 %             |
| 64Zn (KED)  | 309.068 ppb           | 0.2 %             |
| 69Ga (KED)  | 2.731 ppb             | 2.1 %             |
| 75As (KED)  | 1.350 ppb             | 7.5 %             |
| 80Se (KED)  | 5.007 ppb             | 8.3 %             |
| 85Rb (KED)  | 2.675 ppb             | 2.7 %             |
| 88Sr (KED)  | 14.394 ppb            | 0.8 %             |
| 89Y (KED)   | 54.531 %              | 0.8 %             |
| 107Ag (KED) | 0.451 ppb             | 0.8 %             |
| 114Cd (KED) | 0.286 ppb             | 2.3 %             |
| 115In (KED) | 48.843 %              | 0.3 %             |
| 133Cs (KED) | 0.240 ppb             | 2.3 %             |
| 138Ba (KED) | 9.776 ppb             | 1.4 %             |
| 139La (KED) | 0.737 ppb             | 2.1 %             |
| 140Ce (KED) | 1.607 ppb             | 2.0 %             |
| 141Pr (KED) | 0.180 ppb             | 1.6 %             |
| 142Nd (KED) | 0.961 ppb             | 0.7 %             |
| 152Sm (KED) | 0.130 ppb             | 4.0 %             |
| 153Eu (KED) | 0.028 ppb             | 2.2 %             |
| 158Gd (KED) | 0.120 ppb             | 7.3 %             |
| 159Tb (KED) | 49.736 %              | 0.7 %             |
| 164Dy (KED) | 0.087 ppb             | 6.1 %             |
| 166Er (KED) | 0.045 ppb             | 1.1 %             |
| 169Tm (KED) | 0.006 ppb             | 4.7 %             |
| 174Yb (KED) | 0.035 ppb             | 2.3 %             |
| 175Lu (KED) | -0.345 ppb            | 0.8 %             |
| 205Tl (KED) | 0.020 ppb             | 2.7 %             |
| 208Pb (KED) | 2.245 ppb             | 0.9 %             |
| 209Bi (KED) | 42.210 %              | 1.0 %             |
| 232Th (KED) | 0.339 ppb             | 1.5 %             |
| 238U (KED)  | 0.192 ppb             | 3.5 %             |

| Category   | Concentration average | Intensity average | Intensity RSD |
|------------|-----------------------|-------------------|---------------|
| 6Li (KED)  | 63.518 %              | 2,806 cps         | 3.4 %         |
| 9Be (KED)  | 0.056 ppb             | 3 cps             | 100.0 %       |
| 11B (KED)  | 43.408 ppb            | 1,549 cps         | 4.4 %         |
| 24Mg (KED) | 1,313.409 ppb         | 261,513 cps       | 1.9 %         |
| 27Al (KED) | 1,071.460 ppb         | 51,651 cps        | 2.2 %         |





| Category    | Concentration average | Intensity average | Intensity RSD |
|-------------|-----------------------|-------------------|---------------|
| 45Sc (KED)  | 59.785 %              | 32,786 cps        | 3.2 %         |
| 51V (KED)   | 1.569 ppb             | 4,655 cps         | 2.3 %         |
| 52Cr (KED)  | 2.700 ppb             | 12,552 cps        | 1.9 %         |
| 55Mn (KED)  | 33.380 ppb            | 76,688 cps        | 1.9 %         |
| 56Fe (KED)  | 973.664 ppb           | 4,143,310 cps     | 1.2 %         |
| 58Ni (KED)  | 4.264 ppb             | 26,179 cps        | 1.1 %         |
| 59Co (KED)  | 0.494 ppb             | 4,713 cps         | 2.7 %         |
| 63Cu (KED)  | 6.067 ppb             | 39,450 cps        | 2.6 %         |
| 64Zn (KED)  | 336.811 ppb           | 526,447 cps       | 0.8 %         |
| 69Ga (KED)  | 2.243 ppb             | 4,454 cps         | 3.2 %         |
| 75As (KED)  | 1.200 ppb             | 561 cps           | 4.8 %         |
| 80Se (KED)  | 3.834 ppb             | 838 cps           | 2.9 %         |
| 85Rb (KED)  | 2.381 ppb             | 4,682 cps         | 3.3 %         |
| 88Sr (KED)  | 17.077 ppb            | 47,864 cps        | 1.6 %         |
| 89Y (KED)   | 53.545 %              | 301,638 cps       | 1.4 %         |
| 107Ag (KED) | 0.175 ppb             | 3,355 cps         | 2.0 %         |
| 114Cd (KED) | 0.108 ppb             | 800 cps           | 5.0 %         |
| 115In (KED) | 47.984 %              | 572,295 cps       | 0.8 %         |
| 133Cs (KED) | 0.182 ppb             | 1,919 cps         | 6.9 %         |
| 138Ba (KED) | 8.002 ppb             | 125,345 cps       | 1.4 %         |
| 139La (KED) | 0.624 ppb             | 20,298 cps        | 2.5 %         |
| 140Ce (KED) | 1.349 ppb             | 59,651 cps        | 0.3 %         |
| 141Pr (KED) | 0.155 ppb             | 7,187 cps         | 0.9 %         |
| 142Nd (KED) | 0.811 ppb             | 15,413 cps        | 1.8 %         |
| 152Sm (KED) | 0.112 ppb             | 2,089 cps         | 1.2 %         |
| 153Eu (KED) | 0.021 ppb             | 789 cps           | 3.4 %         |
| 158Gd (KED) | 0.103 ppb             | 2,711 cps         | 3.8 %         |
| 159Tb (KED) | 48.692 %              | 3,691,926 cps     | 0.5 %         |
| 164Dy (KED) | 0.069 ppb             | 2,052 cps         | 0.7 %         |
| 166Er (KED) | 0.041 ppb             | 1,856 cps         | 1.5 %         |
| 169Tm (KED) | 0.004 ppb             | 467 cps           | 2.9 %         |
| 174Yb (KED) | 0.027 ppb             | 1,249 cps         | 3.2 %         |
| 175Lu (KED) | -0.346 ppb            | 18,930 cps        | 2.9 %         |
| 205Tl (KED) | 0.019 ppb             | 1,576 cps         | 7.0 %         |
| 208Pb (KED) | 1.849 ppb             | 114,337 cps       | 1.2 %         |
| 209Bi (KED) | 41.323 %              | 3,157,360 cps     | 1.0 %         |
| 232Th (KED) | 0.248 ppb             | 28,785 cps        | 2.0 %         |
| 238U (KED)  | 0.138 ppb             | 19,535 cps        | 1.1 %         |

## Sample Summary

Instrument ID: iCAP Q

Analysis index: 16

Analysis name: 163380jian

Analysis started at: 9/23/2021 4:33:31 PM

User name: WINDOWS-UPCI4ER\Administrator

| Category    | Concentration average | Concentration RSD |
|-------------|-----------------------|-------------------|
| 6Li (KED)   | 62.864 %              | 2.2 %             |
| 9Be (KED)   | 0.000 ppb             |                   |
| 11B (KED)   | 8.991 ppb             | 39.0 %            |
| 24Mg (KED)  | 1,896.801 ppb         | 1.4 %             |
| 27Al (KED)  | 1,301.547 ppb         | 1.3 %             |
| 45Sc (KED)  | 60.356 %              | 1.4 %             |
| 51V (KED)   | 2.481 ppb             | 2.6 %             |
| 52Cr (KED)  | 3.111 ppb             | 1.3 %             |
| 55Mn (KED)  | 47.717 ppb            | 0.0 %             |
| 56Fe (KED)  | 1,343.189 ppb         | 1.1 %             |
| 58Ni (KED)  | 5.570 ppb             | 0.8 %             |
| 59Co (KED)  | 0.715 ppb             | 1.5 %             |
| 63Cu (KED)  | 7.740 ppb             | 0.8 %             |
| 64Zn (KED)  | 337.609 ppb           | 0.4 %             |
| 69Ga (KED)  | 3.830 ppb             | 3.7 %             |
| 75As (KED)  | 1.465 ppb             | 4.9 %             |
| 80Se (KED)  | 4.671 ppb             | 2.6 %             |
| 85Rb (KED)  | 3.526 ppb             | 2.2 %             |
| 88Sr (KED)  | 35.276 ppb            | 1.0 %             |
| 89Y (KED)   | 54.822 %              | 0.4 %             |
| 107Ag (KED) | 0.215 ppb             | 1.5 %             |
| 114Cd (KED) | 0.146 ppb             | 8.2 %             |
| 115In (KED) | 47.523 %              | 0.1 %             |
| 133Cs (KED) | 0.300 ppb             | 1.4 %             |
| 138Ba (KED) | 14.437 ppb            | 0.3 %             |
| 139La (KED) | 1.238 ppb             | 1.1 %             |
| 140Ce (KED) | 2.486 ppb             | 1.7 %             |
| 141Pr (KED) | 0.286 ppb             | 0.3 %             |
| 142Nd (KED) | 1.490 ppb             | 1.4 %             |
| 152Sm (KED) | 0.189 ppb             | 3.1 %             |
| 153Eu (KED) | 0.035 ppb             | 5.8 %             |
| 158Gd (KED) | 0.163 ppb             | 2.3 %             |
| 159Tb (KED) | 49.211 %              | 0.6 %             |
| 164Dy (KED) | 0.115 ppb             | 3.6 %             |
| 166Er (KED) | 0.063 ppb             | 7.8 %             |
| 169Tm (KED) | 0.007 ppb             | 8.5 %             |
| 174Yb (KED) | 0.048 ppb             | 2.9 %             |
| 175Lu (KED) | -0.347 ppb            | 3.4 %             |
| 205Tl (KED) | 0.030 ppb             | 2.7 %             |
| 208Pb (KED) | 2.042 ppb             | 1.2 %             |
| 209Bi (KED) | 40.771 %              | 2.0 %             |
| 232Th (KED) | 0.422 ppb             | 2.2 %             |
| 238U (KED)  | 0.167 ppb             | 3.3 %             |

| Category   | Concentration average | Intensity average | Intensity RSD |
|------------|-----------------------|-------------------|---------------|
| 6Li (KED)  | 62.864 %              | 2,777 cps         | 2.2 %         |
| 9Be (KED)  | 0.000 ppb             | 0 cps             |               |
| 11B (KED)  | 8.991 ppb             | 476 cps           | 20.3 %        |
| 24Mg (KED) | 1,896.801 ppb         | 373,847 cps       | 1.5 %         |
| 27Al (KED) | 1,301.547 ppb         | 62,188 cps        | 0.2 %         |

| Category    | Concentration average | Intensity average | Intensity RSD |
|-------------|-----------------------|-------------------|---------------|
| 45Sc (KED)  | 60.356 %              | 33,099 cps        | 1.4 %         |
| 51V (KED)   | 2.481 ppb             | 7,436 cps         | 3.8 %         |
| 52Cr (KED)  | 3.111 ppb             | 14,596 cps        | 0.5 %         |
| 55Mn (KED)  | 47.717 ppb            | 110,692 cps       | 1.3 %         |
| 56Fe (KED)  | 1,343.189 ppb         | 5,772,146 cps     | 1.5 %         |
| 58Ni (KED)  | 5.570 ppb             | 33,849 cps        | 0.8 %         |
| 59Co (KED)  | 0.715 ppb             | 6,861 cps         | 2.7 %         |
| 63Cu (KED)  | 7.740 ppb             | 51,401 cps        | 0.8 %         |
| 64Zn (KED)  | 337.609 ppb           | 540,379 cps       | 0.7 %         |
| 69Ga (KED)  | 3.830 ppb             | 7,756 cps         | 3.4 %         |
| 75As (KED)  | 1.465 ppb             | 700 cps           | 4.6 %         |
| 80Se (KED)  | 4.671 ppb             | 976 cps           | 1.4 %         |
| 85Rb (KED)  | 3.526 ppb             | 7,094 cps         | 2.5 %         |
| 88Sr (KED)  | 35.276 ppb            | 101,087 cps       | 1.3 %         |
| 89Y (KED)   | 54.822 %              | 308,829 cps       | 0.4 %         |
| 107Ag (KED) | 0.215 ppb             | 4,076 cps         | 1.4 %         |
| 114Cd (KED) | 0.146 ppb             | 1,051 cps         | 7.7 %         |
| 115In (KED) | 47.523 %              | 566,798 cps       | 0.1 %         |
| 133Cs (KED) | 0.300 ppb             | 3,123 cps         | 1.5 %         |
| 138Ba (KED) | 14.437 ppb            | 227,593 cps       | 1.0 %         |
| 139La (KED) | 1.238 ppb             | 40,613 cps        | 1.7 %         |
| 140Ce (KED) | 2.486 ppb             | 110,888 cps       | 1.3 %         |
| 141Pr (KED) | 0.286 ppb             | 13,393 cps        | 0.4 %         |
| 142Nd (KED) | 1.490 ppb             | 28,578 cps        | 0.8 %         |
| 152Sm (KED) | 0.189 ppb             | 3,546 cps         | 3.5 %         |
| 153Eu (KED) | 0.035 ppb             | 1,329 cps         | 5.2 %         |
| 158Gd (KED) | 0.163 ppb             | 4,356 cps         | 2.0 %         |
| 159Tb (KED) | 49.211 %              | 3,731,296 cps     | 0.6 %         |
| 164Dy (KED) | 0.115 ppb             | 3,448 cps         | 3.8 %         |
| 166Er (KED) | 0.063 ppb             | 2,674 cps         | 6.1 %         |
| 169Tm (KED) | 0.007 ppb             | 908 cps           | 7.9 %         |
| 174Yb (KED) | 0.048 ppb             | 2,184 cps         | 3.3 %         |
| 175Lu (KED) | -0.347 ppb            | 19,055 cps        | 3.9 %         |
| 205Tl (KED) | 0.030 ppb             | 2,501 cps         | 2.4 %         |
| 208Pb (KED) | 2.042 ppb             | 123,625 cps       | 1.5 %         |
| 209Bi (KED) | 40.771 %              | 3,115,155 cps     | 2.0 %         |
| 232Th (KED) | 0.422 ppb             | 48,095 cps        | 0.4 %         |
| 238U (KED)  | 0.167 ppb             | 23,315 cps        | 2.2 %         |

## Sample Summary

Instrument ID: iCAP Q

Analysis index: 17

Analysis name: 024965jian

Analysis started at: 9/23/2021 4:37:06 PM

User name: WINDOWS-UPCI4ER\Administrator

| Category    | Concentration average | Concentration RSD |
|-------------|-----------------------|-------------------|
| 6Li (KED)   | 59.367 %              | 1.0 %             |
| 9Be (KED)   | 0.040 ppb             | 173.2 %           |
| 11B (KED)   | 8.835 ppb             | 32.2 %            |
| 24Mg (KED)  | 1,825.678 ppb         | 1.6 %             |
| 27Al (KED)  | 1,515.484 ppb         | 1.2 %             |
| 45Sc (KED)  | 59.946 %              | 1.4 %             |
| 51V (KED)   | 2.904 ppb             | 1.7 %             |
| 52Cr (KED)  | 3.530 ppb             | 1.1 %             |
| 55Mn (KED)  | 40.651 ppb            | 1.1 %             |
| 56Fe (KED)  | 1,586.755 ppb         | 1.5 %             |
| 58Ni (KED)  | 6.777 ppb             | 2.0 %             |
| 59Co (KED)  | 0.742 ppb             | 1.1 %             |
| 63Cu (KED)  | 18.172 ppb            | 0.8 %             |
| 64Zn (KED)  | 299.552 ppb           | 1.8 %             |
| 69Ga (KED)  | 3.676 ppb             | 1.5 %             |
| 75As (KED)  | 1.351 ppb             | 12.5 %            |
| 80Se (KED)  | 3.435 ppb             | 10.8 %            |
| 85Rb (KED)  | 3.946 ppb             | 1.2 %             |
| 88Sr (KED)  | 19.404 ppb            | 1.8 %             |
| 89Y (KED)   | 53.481 %              | 0.5 %             |
| 107Ag (KED) | 0.128 ppb             | 2.9 %             |
| 114Cd (KED) | 0.073 ppb             | 9.2 %             |
| 115In (KED) | 47.307 %              | 0.9 %             |
| 133Cs (KED) | 0.320 ppb             | 0.4 %             |
| 138Ba (KED) | 13.080 ppb            | 1.5 %             |
| 139La (KED) | 0.988 ppb             | 1.3 %             |
| 140Ce (KED) | 2.212 ppb             | 1.4 %             |
| 141Pr (KED) | 0.235 ppb             | 2.2 %             |
| 142Nd (KED) | 1.288 ppb             | 2.3 %             |
| 152Sm (KED) | 0.179 ppb             | 1.2 %             |
| 153Eu (KED) | 0.039 ppb             | 5.3 %             |
| 158Gd (KED) | 0.154 ppb             | 2.5 %             |
| 159Tb (KED) | 49.106 %              | 1.5 %             |
| 164Dy (KED) | 0.115 ppb             | 5.0 %             |
| 166Er (KED) | 0.051 ppb             | 2.3 %             |
| 169Tm (KED) | 0.007 ppb             | 7.3 %             |
| 174Yb (KED) | 0.045 ppb             | 6.0 %             |
| 175Lu (KED) | -0.349 ppb            | 3.2 %             |
| 205Tl (KED) | 0.028 ppb             | 2.3 %             |
| 208Pb (KED) | 2.077 ppb             | 1.6 %             |
| 209Bi (KED) | 40.961 %              | 0.7 %             |
| 232Th (KED) | 0.447 ppb             | 0.9 %             |
| 238U (KED)  | 0.251 ppb             | 0.6 %             |

| Category   | Concentration average | Intensity average | Intensity RSD |
|------------|-----------------------|-------------------|---------------|
| 6Li (KED)  | 59.367 %              | 2,623 cps         | 1.0 %         |
| 9Be (KED)  | 0.040 ppb             | 2 cps             | 173.2 %       |
| 11B (KED)  | 8.835 ppb             | 446 cps           | 17.7 %        |
| 24Mg (KED) | 1,825.678 ppb         | 339,836 cps       | 0.6 %         |
| 27Al (KED) | 1,515.484 ppb         | 71,908 cps        | 0.6 %         |

| Category    | Concentration average | Intensity average | Intensity RSD |
|-------------|-----------------------|-------------------|---------------|
| 45Sc (KED)  | 59.946 %              | 32,874 cps        | 1.4 %         |
| 51V (KED)   | 2.904 ppb             | 8,642 cps         | 1.9 %         |
| 52Cr (KED)  | 3.530 ppb             | 16,441 cps        | 1.8 %         |
| 55Mn (KED)  | 40.651 ppb            | 93,661 cps        | 0.3 %         |
| 56Fe (KED)  | 1,586.755 ppb         | 6,771,296 cps     | 0.3 %         |
| 58Ni (KED)  | 6.777 ppb             | 40,405 cps        | 1.2 %         |
| 59Co (KED)  | 0.742 ppb             | 7,072 cps         | 2.3 %         |
| 63Cu (KED)  | 18.172 ppb            | 117,064 cps       | 0.7 %         |
| 64Zn (KED)  | 299.552 ppb           | 468,047 cps       | 1.2 %         |
| 69Ga (KED)  | 3.676 ppb             | 7,264 cps         | 1.2 %         |
| 75As (KED)  | 1.351 ppb             | 630 cps           | 12.0 %        |
| 80Se (KED)  | 3.435 ppb             | 782 cps           | 6.7 %         |
| 85Rb (KED)  | 3.946 ppb             | 7,744 cps         | 1.3 %         |
| 88Sr (KED)  | 19.404 ppb            | 54,302 cps        | 1.5 %         |
| 89Y (KED)   | 53.481 %              | 301,273 cps       | 0.5 %         |
| 107Ag (KED) | 0.128 ppb             | 2,427 cps         | 3.7 %         |
| 114Cd (KED) | 0.073 ppb             | 546 cps           | 7.5 %         |
| 115In (KED) | 47.307 %              | 564,217 cps       | 0.9 %         |
| 133Cs (KED) | 0.320 ppb             | 3,312 cps         | 1.1 %         |
| 138Ba (KED) | 13.080 ppb            | 205,834 cps       | 0.5 %         |
| 139La (KED) | 0.988 ppb             | 32,339 cps        | 0.7 %         |
| 140Ce (KED) | 2.212 ppb             | 98,478 cps        | 0.7 %         |
| 141Pr (KED) | 0.235 ppb             | 11,023 cps        | 1.1 %         |
| 142Nd (KED) | 1.288 ppb             | 24,657 cps        | 1.0 %         |
| 152Sm (KED) | 0.179 ppb             | 3,348 cps         | 1.0 %         |
| 153Eu (KED) | 0.039 ppb             | 1,451 cps         | 4.0 %         |
| 158Gd (KED) | 0.154 ppb             | 4,096 cps         | 3.0 %         |
| 159Tb (KED) | 49.106 %              | 3,723,311 cps     | 1.5 %         |
| 164Dy (KED) | 0.115 ppb             | 3,434 cps         | 4.2 %         |
| 166Er (KED) | 0.051 ppb             | 2,220 cps         | 1.8 %         |
| 169Tm (KED) | 0.007 ppb             | 907 cps           | 6.2 %         |
| 174Yb (KED) | 0.045 ppb             | 2,064 cps         | 5.4 %         |
| 175Lu (KED) | -0.349 ppb            | 18,860 cps        | 5.2 %         |
| 205Tl (KED) | 0.028 ppb             | 2,311 cps         | 2.8 %         |
| 208Pb (KED) | 2.077 ppb             | 126,180 cps       | 0.7 %         |
| 209Bi (KED) | 40.961 %              | 3,129,673 cps     | 0.7 %         |
| 232Th (KED) | 0.447 ppb             | 51,289 cps        | 1.4 %         |
| 238U (KED)  | 0.251 ppb             | 35,161 cps        | 0.6 %         |

## Sample Summary

Instrument ID: iCAP Q

Analysis index: 18

Analysis name: 028728jian

Analysis started at: 9/23/2021 4:40:37 PM

User name: WINDOWS-UPCI4ER\Administrator

| Category    | Concentration average | Concentration RSD |
|-------------|-----------------------|-------------------|
| 6Li (KED)   | 59.241 %              | 4.2 %             |
| 9Be (KED)   | 0.063 ppb             | 100.3 %           |
| 11B (KED)   | 10.321 ppb            | 5.5 %             |
| 24Mg (KED)  | 961.680 ppb           | 3.2 %             |
| 27Al (KED)  | 658.135 ppb           | 0.8 %             |
| 45Sc (KED)  | 58.536 %              | 0.6 %             |
| 51V (KED)   | 1.268 ppb             | 4.2 %             |
| 52Cr (KED)  | 2.491 ppb             | 1.5 %             |
| 55Mn (KED)  | 19.851 ppb            | 0.6 %             |
| 56Fe (KED)  | 776.026 ppb           | 2.0 %             |
| 58Ni (KED)  | 3.447 ppb             | 2.0 %             |
| 59Co (KED)  | 0.367 ppb             | 3.4 %             |
| 63Cu (KED)  | 11.354 ppb            | 1.2 %             |
| 64Zn (KED)  | 303.492 ppb           | 1.3 %             |
| 69Ga (KED)  | 1.593 ppb             | 6.7 %             |
| 75As (KED)  | 0.911 ppb             | 6.5 %             |
| 80Se (KED)  | 2.825 ppb             | 8.7 %             |
| 85Rb (KED)  | 2.166 ppb             | 3.4 %             |
| 88Sr (KED)  | 9.955 ppb             | 1.9 %             |
| 89Y (KED)   | 53.279 %              | 1.1 %             |
| 107Ag (KED) | 0.187 ppb             | 4.9 %             |
| 114Cd (KED) | 0.071 ppb             | 9.8 %             |
| 115In (KED) | 48.163 %              | 1.5 %             |
| 133Cs (KED) | 0.152 ppb             | 6.0 %             |
| 138Ba (KED) | 5.858 ppb             | 2.0 %             |
| 139La (KED) | 0.492 ppb             | 0.6 %             |
| 140Ce (KED) | 1.043 ppb             | 2.9 %             |
| 141Pr (KED) | 0.123 ppb             | 3.6 %             |
| 142Nd (KED) | 0.660 ppb             | 0.3 %             |
| 152Sm (KED) | 0.090 ppb             | 2.8 %             |
| 153Eu (KED) | 0.018 ppb             | 5.7 %             |
| 158Gd (KED) | 0.084 ppb             | 7.8 %             |
| 159Tb (KED) | 49.842 %              | 2.4 %             |
| 164Dy (KED) | 0.056 ppb             | 0.1 %             |
| 166Er (KED) | 0.030 ppb             | 5.4 %             |
| 169Tm (KED) | 0.003 ppb             | 8.1 %             |
| 174Yb (KED) | 0.024 ppb             | 2.1 %             |
| 175Lu (KED) | -0.358 ppb            | 2.3 %             |
| 205Tl (KED) | 0.016 ppb             | 6.0 %             |
| 208Pb (KED) | 1.266 ppb             | 1.5 %             |
| 209Bi (KED) | 41.481 %              | 1.4 %             |
| 232Th (KED) | 0.214 ppb             | 1.7 %             |
| 238U (KED)  | 0.127 ppb             | 1.2 %             |

| Category   | Concentration average | Intensity average | Intensity RSD |
|------------|-----------------------|-------------------|---------------|
| 6Li (KED)  | 59.241 %              | 2,617 cps         | 4.2 %         |
| 9Be (KED)  | 0.063 ppb             | 3 cps             | 100.0 %       |
| 11B (KED)  | 10.321 ppb            | 488 cps           | 3.8 %         |
| 24Mg (KED) | 961.680 ppb           | 178,586 cps       | 1.0 %         |
| 27Al (KED) | 658.135 ppb           | 30,535 cps        | 1.1 %         |

| Category    | Concentration average | Intensity average | Intensity RSD |
|-------------|-----------------------|-------------------|---------------|
| 45Sc (KED)  | 58.536 %              | 32,101 cps        | 0.6 %         |
| 51V (KED)   | 1.268 ppb             | 3,687 cps         | 3.9 %         |
| 52Cr (KED)  | 2.491 ppb             | 11,350 cps        | 1.0 %         |
| 55Mn (KED)  | 19.851 ppb            | 44,707 cps        | 0.1 %         |
| 56Fe (KED)  | 776.026 ppb           | 3,235,079 cps     | 1.5 %         |
| 58Ni (KED)  | 3.447 ppb             | 21,158 cps        | 1.3 %         |
| 59Co (KED)  | 0.367 ppb             | 3,453 cps         | 3.2 %         |
| 63Cu (KED)  | 11.354 ppb            | 73,047 cps        | 0.4 %         |
| 64Zn (KED)  | 303.492 ppb           | 472,361 cps       | 0.3 %         |
| 69Ga (KED)  | 1.593 ppb             | 3,160 cps         | 5.8 %         |
| 75As (KED)  | 0.911 ppb             | 426 cps           | 5.5 %         |
| 80Se (KED)  | 2.825 ppb             | 696 cps           | 4.0 %         |
| 85Rb (KED)  | 2.166 ppb             | 4,240 cps         | 2.4 %         |
| 88Sr (KED)  | 9.955 ppb             | 27,822 cps        | 2.1 %         |
| 89Y (KED)   | 53.279 %              | 300,138 cps       | 1.1 %         |
| 107Ag (KED) | 0.187 ppb             | 3,598 cps         | 5.1 %         |
| 114Cd (KED) | 0.071 ppb             | 542 cps           | 9.2 %         |
| 115In (KED) | 48.163 %              | 574,433 cps       | 1.5 %         |
| 133Cs (KED) | 0.152 ppb             | 1,621 cps         | 6.5 %         |
| 138Ba (KED) | 5.858 ppb             | 94,222 cps        | 0.7 %         |
| 139La (KED) | 0.492 ppb             | 16,377 cps        | 2.4 %         |
| 140Ce (KED) | 1.043 ppb             | 47,217 cps        | 1.1 %         |
| 141Pr (KED) | 0.123 ppb             | 5,832 cps         | 1.7 %         |
| 142Nd (KED) | 0.660 ppb             | 12,852 cps        | 2.3 %         |
| 152Sm (KED) | 0.090 ppb             | 1,717 cps         | 3.2 %         |
| 153Eu (KED) | 0.018 ppb             | 693 cps           | 4.4 %         |
| 158Gd (KED) | 0.084 ppb             | 2,268 cps         | 5.9 %         |
| 159Tb (KED) | 49.842 %              | 3,779,115 cps     | 2.4 %         |
| 164Dy (KED) | 0.056 ppb             | 1,712 cps         | 2.4 %         |
| 166Er (KED) | 0.030 ppb             | 1,461 cps         | 2.8 %         |
| 169Tm (KED) | 0.003 ppb             | 447 cps           | 6.0 %         |
| 174Yb (KED) | 0.024 ppb             | 1,106 cps         | 1.0 %         |
| 175Lu (KED) | -0.358 ppb            | 18,469 cps        | 0.9 %         |
| 205Tl (KED) | 0.016 ppb             | 1,328 cps         | 4.7 %         |
| 208Pb (KED) | 1.266 ppb             | 81,506 cps        | 2.1 %         |
| 209Bi (KED) | 41.481 %              | 3,169,395 cps     | 1.4 %         |
| 232Th (KED) | 0.214 ppb             | 24,929 cps        | 1.2 %         |
| 238U (KED)  | 0.127 ppb             | 18,099 cps        | 1.8 %         |

## Sample Summary

Instrument ID: iCAP Q

Analysis index: 19

Analysis name: 011048jian

Analysis started at: 9/23/2021 4:44:12 PM

User name: WINDOWS-UPCI4ER\Administrator

| Category    | Concentration average | Concentration RSD |
|-------------|-----------------------|-------------------|
| 6Li (KED)   | 60.499 %              | 1.7 %             |
| 9Be (KED)   | 0.000 ppb             |                   |
| 11B (KED)   | 12.522 ppb            | 9.9 %             |
| 24Mg (KED)  | 1,565.865 ppb         | 2.8 %             |
| 27Al (KED)  | 1,053.393 ppb         | 1.8 %             |
| 45Sc (KED)  | 57.049 %              | 1.2 %             |
| 51V (KED)   | 2.070 ppb             | 0.7 %             |
| 52Cr (KED)  | 4.297 ppb             | 1.0 %             |
| 55Mn (KED)  | 29.795 ppb            | 1.9 %             |
| 56Fe (KED)  | 1,181.079 ppb         | 0.9 %             |
| 58Ni (KED)  | 5.113 ppb             | 1.4 %             |
| 59Co (KED)  | 0.589 ppb             | 4.3 %             |
| 63Cu (KED)  | 8.991 ppb             | 2.4 %             |
| 64Zn (KED)  | 320.016 ppb           | 0.8 %             |
| 69Ga (KED)  | 2.602 ppb             | 3.2 %             |
| 75As (KED)  | 1.832 ppb             | 5.5 %             |
| 80Se (KED)  | 4.500 ppb             | 8.4 %             |
| 85Rb (KED)  | 2.806 ppb             | 3.3 %             |
| 88Sr (KED)  | 17.603 ppb            | 1.0 %             |
| 89Y (KED)   | 52.716 %              | 1.5 %             |
| 107Ag (KED) | 0.246 ppb             | 0.4 %             |
| 114Cd (KED) | 0.200 ppb             | 4.6 %             |
| 115In (KED) | 47.535 %              | 2.3 %             |
| 133Cs (KED) | 0.229 ppb             | 4.8 %             |
| 138Ba (KED) | 9.972 ppb             | 2.0 %             |
| 139La (KED) | 0.839 ppb             | 2.5 %             |
| 140Ce (KED) | 1.743 ppb             | 2.7 %             |
| 141Pr (KED) | 0.196 ppb             | 5.9 %             |
| 142Nd (KED) | 1.073 ppb             | 2.7 %             |
| 152Sm (KED) | 0.142 ppb             | 5.9 %             |
| 153Eu (KED) | 0.030 ppb             | 2.6 %             |
| 158Gd (KED) | 0.130 ppb             | 3.0 %             |
| 159Tb (KED) | 49.282 %              | 1.8 %             |
| 164Dy (KED) | 0.089 ppb             | 2.9 %             |
| 166Er (KED) | 0.046 ppb             | 2.8 %             |
| 169Tm (KED) | 0.005 ppb             | 6.2 %             |
| 174Yb (KED) | 0.034 ppb             | 6.4 %             |
| 175Lu (KED) | -0.355 ppb            | 1.3 %             |
| 205Tl (KED) | 0.019 ppb             | 2.9 %             |
| 208Pb (KED) | 2.007 ppb             | 1.0 %             |
| 209Bi (KED) | 43.449 %              | 0.9 %             |
| 232Th (KED) | 0.293 ppb             | 1.1 %             |
| 238U (KED)  | 0.155 ppb             | 0.5 %             |

| Category   | Concentration average | Intensity average | Intensity RSD |
|------------|-----------------------|-------------------|---------------|
| 6Li (KED)  | 60.499 %              | 2,673 cps         | 1.7 %         |
| 9Be (KED)  | 0.000 ppb             | 0 cps             |               |
| 11B (KED)  | 12.522 ppb            | 563 cps           | 6.3 %         |
| 24Mg (KED) | 1,565.865 ppb         | 296,999 cps       | 1.2 %         |
| 27Al (KED) | 1,053.393 ppb         | 47,585 cps        | 0.7 %         |

| Category    | Concentration average | Intensity average | Intensity RSD |
|-------------|-----------------------|-------------------|---------------|
| 45Sc (KED)  | 57.049 %              | 31,286 cps        | 1.2 %         |
| 51V (KED)   | 2.070 ppb             | 5,864 cps         | 1.6 %         |
| 52Cr (KED)  | 4.297 ppb             | 19,033 cps        | 1.8 %         |
| 55Mn (KED)  | 29.795 ppb            | 65,354 cps        | 1.6 %         |
| 56Fe (KED)  | 1,181.079 ppb         | 4,797,535 cps     | 0.8 %         |
| 58Ni (KED)  | 5.113 ppb             | 29,543 cps        | 0.3 %         |
| 59Co (KED)  | 0.589 ppb             | 5,350 cps         | 4.2 %         |
| 63Cu (KED)  | 8.991 ppb             | 57,326 cps        | 1.2 %         |
| 64Zn (KED)  | 320.016 ppb           | 492,662 cps       | 0.8 %         |
| 69Ga (KED)  | 2.602 ppb             | 5,081 cps         | 3.7 %         |
| 75As (KED)  | 1.832 ppb             | 840 cps           | 5.2 %         |
| 80Se (KED)  | 4.500 ppb             | 914 cps           | 4.2 %         |
| 85Rb (KED)  | 2.806 ppb             | 5,431 cps         | 3.4 %         |
| 88Sr (KED)  | 17.603 ppb            | 48,570 cps        | 0.8 %         |
| 89Y (KED)   | 52.716 %              | 296,966 cps       | 1.5 %         |
| 107Ag (KED) | 0.246 ppb             | 4,673 cps         | 2.6 %         |
| 114Cd (KED) | 0.200 ppb             | 1,422 cps         | 6.3 %         |
| 115In (KED) | 47.535 %              | 566,939 cps       | 2.3 %         |
| 133Cs (KED) | 0.229 ppb             | 2,387 cps         | 3.3 %         |
| 138Ba (KED) | 9.972 ppb             | 157,764 cps       | 0.3 %         |
| 139La (KED) | 0.839 ppb             | 27,570 cps        | 0.7 %         |
| 140Ce (KED) | 1.743 ppb             | 77,923 cps        | 1.3 %         |
| 141Pr (KED) | 0.196 ppb             | 9,218 cps         | 4.9 %         |
| 142Nd (KED) | 1.073 ppb             | 20,623 cps        | 1.1 %         |
| 152Sm (KED) | 0.142 ppb             | 2,669 cps         | 4.9 %         |
| 153Eu (KED) | 0.030 ppb             | 1,128 cps         | 2.5 %         |
| 158Gd (KED) | 0.130 ppb             | 3,485 cps         | 2.2 %         |
| 159Tb (KED) | 49.282 %              | 3,736,704 cps     | 1.8 %         |
| 164Dy (KED) | 0.089 ppb             | 2,688 cps         | 2.6 %         |
| 166Er (KED) | 0.046 ppb             | 2,039 cps         | 3.1 %         |
| 169Tm (KED) | 0.005 ppb             | 684 cps           | 5.8 %         |
| 174Yb (KED) | 0.034 ppb             | 1,567 cps         | 5.5 %         |
| 175Lu (KED) | -0.355 ppb            | 18,495 cps        | 1.3 %         |
| 205Tl (KED) | 0.019 ppb             | 1,652 cps         | 2.7 %         |
| 208Pb (KED) | 2.007 ppb             | 129,669 cps       | 1.0 %         |
| 209Bi (KED) | 43.449 %              | 3,319,779 cps     | 0.9 %         |
| 232Th (KED) | 0.293 ppb             | 35,675 cps        | 0.2 %         |
| 238U (KED)  | 0.155 ppb             | 23,150 cps        | 1.3 %         |

## Sample Summary

Instrument ID: iCAP Q

Analysis index: 20

Analysis name: 010195jian

Analysis started at: 9/23/2021 4:47:39 PM

User name: WINDOWS-UPCI4ER\Administrator

| Category    | Concentration average | Concentration RSD |
|-------------|-----------------------|-------------------|
| 6Li (KED)   | 60.574 %              | 1.6 %             |
| 9Be (KED)   | 0.000 ppb             |                   |
| 11B (KED)   | 7.617 ppb             | 7.1 %             |
| 24Mg (KED)  | 1,223.558 ppb         | 1.5 %             |
| 27Al (KED)  | 723.671 ppb           | 1.0 %             |
| 45Sc (KED)  | 59.074 %              | 2.9 %             |
| 51V (KED)   | 1.450 ppb             | 1.7 %             |
| 52Cr (KED)  | 2.389 ppb             | 2.8 %             |
| 55Mn (KED)  | 23.699 ppb            | 2.2 %             |
| 56Fe (KED)  | 811.993 ppb           | 3.1 %             |
| 58Ni (KED)  | 3.953 ppb             | 3.8 %             |
| 59Co (KED)  | 0.447 ppb             | 0.3 %             |
| 63Cu (KED)  | 9.307 ppb             | 1.6 %             |
| 64Zn (KED)  | 335.632 ppb           | 0.6 %             |
| 69Ga (KED)  | 1.980 ppb             | 1.2 %             |
| 75As (KED)  | 1.462 ppb             | 2.4 %             |
| 80Se (KED)  | 4.188 ppb             | 1.6 %             |
| 85Rb (KED)  | 2.606 ppb             | 0.1 %             |
| 88Sr (KED)  | 15.453 ppb            | 1.2 %             |
| 89Y (KED)   | 53.284 %              | 0.2 %             |
| 107Ag (KED) | 0.134 ppb             | 2.0 %             |
| 114Cd (KED) | 0.107 ppb             | 11.7 %            |
| 115In (KED) | 47.969 %              | 0.7 %             |
| 133Cs (KED) | 0.157 ppb             | 1.3 %             |
| 138Ba (KED) | 7.147 ppb             | 2.1 %             |
| 139La (KED) | 0.531 ppb             | 0.1 %             |
| 140Ce (KED) | 1.396 ppb             | 1.2 %             |
| 141Pr (KED) | 0.131 ppb             | 3.5 %             |
| 142Nd (KED) | 0.781 ppb             | 2.5 %             |
| 152Sm (KED) | 0.097 ppb             | 2.4 %             |
| 153Eu (KED) | 0.020 ppb             | 8.1 %             |
| 158Gd (KED) | 0.090 ppb             | 5.1 %             |
| 159Tb (KED) | 50.084 %              | 0.8 %             |
| 164Dy (KED) | 0.060 ppb             | 6.6 %             |
| 166Er (KED) | 0.033 ppb             | 3.5 %             |
| 169Tm (KED) | 0.004 ppb             | 15.8 %            |
| 174Yb (KED) | 0.023 ppb             | 1.7 %             |
| 175Lu (KED) | -0.358 ppb            | 2.4 %             |
| 205Tl (KED) | 0.019 ppb             | 4.3 %             |
| 208Pb (KED) | 2.131 ppb             | 2.8 %             |
| 209Bi (KED) | 42.073 %              | 1.8 %             |
| 232Th (KED) | 0.222 ppb             | 1.8 %             |
| 238U (KED)  | 0.124 ppb             | 1.3 %             |

| Category   | Concentration average | Intensity average | Intensity RSD |
|------------|-----------------------|-------------------|---------------|
| 6Li (KED)  | 60.574 %              | 2,676 cps         | 1.6 %         |
| 9Be (KED)  | 0.000 ppb             | 0 cps             |               |
| 11B (KED)  | 7.617 ppb             | 419 cps           | 3.3 %         |
| 24Mg (KED) | 1,223.558 ppb         | 232,458 cps       | 1.3 %         |
| 27Al (KED) | 723.671 ppb           | 33,875 cps        | 2.7 %         |

| Category    | Concentration average | Intensity average | Intensity RSD |
|-------------|-----------------------|-------------------|---------------|
| 45Sc (KED)  | 59.074 %              | 32,396 cps        | 2.9 %         |
| 51V (KED)   | 1.450 ppb             | 4,256 cps         | 4.6 %         |
| 52Cr (KED)  | 2.389 ppb             | 10,980 cps        | 0.2 %         |
| 55Mn (KED)  | 23.699 ppb            | 53,827 cps        | 1.0 %         |
| 56Fe (KED)  | 811.993 ppb           | 3,414,275 cps     | 0.3 %         |
| 58Ni (KED)  | 3.953 ppb             | 24,144 cps        | 0.6 %         |
| 59Co (KED)  | 0.447 ppb             | 4,223 cps         | 3.0 %         |
| 63Cu (KED)  | 9.307 ppb             | 59,976 cps        | 1.8 %         |
| 64Zn (KED)  | 335.632 ppb           | 522,160 cps       | 0.6 %         |
| 69Ga (KED)  | 1.980 ppb             | 3,918 cps         | 1.3 %         |
| 75As (KED)  | 1.462 ppb             | 679 cps           | 2.5 %         |
| 80Se (KED)  | 4.188 ppb             | 882 cps           | 1.0 %         |
| 85Rb (KED)  | 2.606 ppb             | 5,100 cps         | 0.2 %         |
| 88Sr (KED)  | 15.453 ppb            | 43,116 cps        | 1.0 %         |
| 89Y (KED)   | 53.284 %              | 300,168 cps       | 0.2 %         |
| 107Ag (KED) | 0.134 ppb             | 2,574 cps         | 2.6 %         |
| 114Cd (KED) | 0.107 ppb             | 792 cps           | 10.8 %        |
| 115In (KED) | 47.969 %              | 572,115 cps       | 0.7 %         |
| 133Cs (KED) | 0.157 ppb             | 1,663 cps         | 1.8 %         |
| 138Ba (KED) | 7.147 ppb             | 115,275 cps       | 1.8 %         |
| 139La (KED) | 0.531 ppb             | 17,755 cps        | 0.8 %         |
| 140Ce (KED) | 1.396 ppb             | 63,477 cps        | 0.4 %         |
| 141Pr (KED) | 0.131 ppb             | 6,288 cps         | 2.8 %         |
| 142Nd (KED) | 0.781 ppb             | 15,278 cps        | 1.7 %         |
| 152Sm (KED) | 0.097 ppb             | 1,851 cps         | 2.9 %         |
| 153Eu (KED) | 0.020 ppb             | 779 cps           | 7.9 %         |
| 158Gd (KED) | 0.090 ppb             | 2,448 cps         | 4.6 %         |
| 159Tb (KED) | 50.084 %              | 3,797,505 cps     | 0.8 %         |
| 164Dy (KED) | 0.060 ppb             | 1,849 cps         | 6.2 %         |
| 166Er (KED) | 0.033 ppb             | 1,579 cps         | 2.1 %         |
| 169Tm (KED) | 0.004 ppb             | 512 cps           | 15.4 %        |
| 174Yb (KED) | 0.023 ppb             | 1,099 cps         | 1.0 %         |
| 175Lu (KED) | -0.358 ppb            | 18,623 cps        | 2.6 %         |
| 205Tl (KED) | 0.019 ppb             | 1,596 cps         | 5.2 %         |
| 208Pb (KED) | 2.131 ppb             | 132,753 cps       | 1.3 %         |
| 209Bi (KED) | 42.073 %              | 3,214,621 cps     | 1.8 %         |
| 232Th (KED) | 0.222 ppb             | 26,147 cps        | 1.0 %         |
| 238U (KED)  | 0.124 ppb             | 17,872 cps        | 3.0 %         |























| Category    | Concentration average | Intensity average | Intensity RSD |
|-------------|-----------------------|-------------------|---------------|
| 45Sc (KED)  | 58.524 %              | 32,095 cps        |               |
| 51V (KED)   | 2.507 ppb             | 7,285 cps         |               |
| 52Cr (KED)  | 3.776 ppb             | 17,165 cps        |               |
| 55Mn (KED)  | 41.185 ppb            | 92,649 cps        |               |
| 56Fe (KED)  | 1,544.596 ppb         | 6,435,972 cps     |               |
| 58Ni (KED)  | 6.412 ppb             | 37,446 cps        |               |
| 59Co (KED)  | 0.819 ppb             | 7,609 cps         |               |
| 63Cu (KED)  | 11.480 ppb            | 75,306 cps        |               |
| 64Zn (KED)  | 317.814 ppb           | 504,240 cps       |               |
| 69Ga (KED)  | 3.298 ppb             | 6,625 cps         |               |
| 75As (KED)  | 1.457 ppb             | 690 cps           |               |
| 80Se (KED)  | 6.536 ppb             | 1,227 cps         |               |
| 85Rb (KED)  | 3.427 ppb             | 6,832 cps         |               |
| 88Sr (KED)  | 23.614 ppb            | 67,097 cps        |               |
| 89Y (KED)   | 54.323 %              | 306,016 cps       |               |
| 107Ag (KED) | 0.191 ppb             | 3,664 cps         |               |
| 114Cd (KED) | 0.329 ppb             | 2,337 cps         |               |
| 115In (KED) | 48.073 %              | 573,353 cps       |               |
| 133Cs (KED) | 0.312 ppb             | 3,280 cps         |               |
| 138Ba (KED) | 12.855 ppb            | 201,821 cps       |               |
| 139La (KED) | 1.229 ppb             | 40,111 cps        |               |
| 140Ce (KED) | 2.459 ppb             | 109,162 cps       |               |
| 141Pr (KED) | 0.286 ppb             | 13,344 cps        |               |
| 142Nd (KED) | 1.505 ppb             | 28,743 cps        |               |
| 152Sm (KED) | 0.194 ppb             | 3,631 cps         |               |
| 153Eu (KED) | 0.038 ppb             | 1,433 cps         |               |
| 158Gd (KED) | 0.185 ppb             | 4,901 cps         |               |
| 159Tb (KED) | 48.979 %              | 3,713,680 cps     |               |
| 164Dy (KED) | 0.124 ppb             | 3,701 cps         |               |
| 166Er (KED) | 0.060 ppb             | 2,550 cps         |               |
| 169Tm (KED) | 0.007 ppb             | 913 cps           |               |
| 174Yb (KED) | 0.046 ppb             | 2,084 cps         |               |
| 175Lu (KED) | -0.359 ppb            | 18,087 cps        |               |
| 205Tl (KED) | 0.024 ppb             | 2,170 cps         |               |
| 208Pb (KED) | 2.441 ppb             | 161,023 cps       |               |
| 209Bi (KED) | 44.946 %              | 3,434,155 cps     |               |
| 232Th (KED) | 0.428 ppb             | 53,869 cps        |               |
| 238U (KED)  | 0.195 ppb             | 30,086 cps        |               |











| Category    | Concentration average | Intensity average | Intensity RSD |
|-------------|-----------------------|-------------------|---------------|
| 45Sc (KED)  | 60.681 %              | 33,278 cps        |               |
| 51V (KED)   | 2.080 ppb             | 6,268 cps         |               |
| 52Cr (KED)  | 3.818 ppb             | 17,993 cps        |               |
| 55Mn (KED)  | 32.027 ppb            | 74,723 cps        |               |
| 56Fe (KED)  | 1,127.361 ppb         | 4,871,248 cps     |               |
| 58Ni (KED)  | 4.765 ppb             | 29,445 cps        |               |
| 59Co (KED)  | 0.591 ppb             | 5,711 cps         |               |
| 63Cu (KED)  | 11.856 ppb            | 79,653 cps        |               |
| 64Zn (KED)  | 319.355 ppb           | 519,045 cps       |               |
| 69Ga (KED)  | 2.522 ppb             | 5,201 cps         |               |
| 75As (KED)  | 1.339 ppb             | 650 cps           |               |
| 80Se (KED)  | 3.595 ppb             | 837 cps           |               |
| 85Rb (KED)  | 2.623 ppb             | 5,361 cps         |               |
| 88Sr (KED)  | 21.288 ppb            | 61,980 cps        |               |
| 89Y (KED)   | 55.649 %              | 313,490 cps       |               |
| 107Ag (KED) | 0.127 ppb             | 2,570 cps         |               |
| 114Cd (KED) | 0.107 ppb             | 830 cps           |               |
| 115In (KED) | 50.453 %              | 601,737 cps       |               |
| 133Cs (KED) | 0.231 ppb             | 2,554 cps         |               |
| 138Ba (KED) | 10.146 ppb            | 163,894 cps       |               |
| 139La (KED) | 0.868 ppb             | 29,121 cps        |               |
| 140Ce (KED) | 1.800 ppb             | 82,176 cps        |               |
| 141Pr (KED) | 0.205 ppb             | 9,817 cps         |               |
| 142Nd (KED) | 1.134 ppb             | 22,257 cps        |               |
| 152Sm (KED) | 0.156 ppb             | 2,997 cps         |               |
| 153Eu (KED) | 0.031 ppb             | 1,203 cps         |               |
| 158Gd (KED) | 0.140 ppb             | 3,824 cps         |               |
| 159Tb (KED) | 50.316 %              | 3,815,087 cps     |               |
| 164Dy (KED) | 0.094 ppb             | 2,894 cps         |               |
| 166Er (KED) | 0.041 ppb             | 1,887 cps         |               |
| 169Tm (KED) | 0.006 ppb             | 740 cps           |               |
| 174Yb (KED) | 0.038 ppb             | 1,787 cps         |               |
| 175Lu (KED) | -0.363 ppb            | 18,344 cps        |               |
| 205Tl (KED) | 0.017 ppb             | 1,490 cps         |               |
| 208Pb (KED) | 1.952 ppb             | 124,832 cps       |               |
| 209Bi (KED) | 42.909 %              | 3,278,493 cps     |               |
| 232Th (KED) | 0.300 ppb             | 36,019 cps        |               |
| 238U (KED)  | 0.220 ppb             | 32,389 cps        |               |
