# Supplementary material for: Geographic and breed-specific traceability of cashmere via mineral element profiling in Inner Mongolia (Ordos, Chifeng, and Alxa League)
Source: Royal Society of Chemistry journal article supplement (doi:10.1039/d5ra08122j), 2026-01-01
Supplement: d5ra08122j1.zip [file 20210926-a you qi ba yan gao le(1-15)+e qi (16-17)+a you qi ba yan gao le(18-24).pdf › ԭʼ޿/20210926-a you qi ba yan gao le(1-15)+e qi (16-17)+a you qi ba yan gao le(18-24).pdf]

## Instrument Summary:

Instrument ID: iCAP Q  
Serial Number: Undefined

## Labbook Summary:

Path and filename: \_Application Data\Workspace\LabBooks\wlw\20210926-1.imexp  
Labbook created by: Administrator  
Based on template:  
Hardware configuration: iCAPQ1  
Labbook type: eQuant  
Qtegra version (last saved): 2.7.2425.154  
Labbook started: 9/26/2021 2:33:56 PM  
Labbook finished: 9/26/2021 4:09:25 PM

## Method Summary:

| Isotope     | Mode | Dwell time (s) | # of Channels | Spacing | Resolution | IS          |
|-------------|------|----------------|---------------|---------|------------|-------------|
| 6Li (KED)   | KED  | 0.03           | 3             | 0.1     | Normal     |             |
| 9Be (KED)   | KED  | 0.03           | 3             | 0.1     | Normal     | 6Li (KED)   |
| 11B (KED)   | KED  | 0.03           | 3             | 0.1     | Normal     | 6Li (KED)   |
| 24Mg (KED)  | KED  | 0.03           | 3             | 0.1     | Normal     | 6Li (KED)   |
| 27Al (KED)  | KED  | 0.03           | 3             | 0.1     | Normal     | 45Sc (KED)  |
| 45Sc (KED)  | KED  | 0.03           | 3             | 0.1     | Normal     |             |
| 51V (KED)   | KED  | 0.03           | 3             | 0.1     | Normal     | 45Sc (KED)  |
| 52Cr (KED)  | KED  | 0.03           | 3             | 0.1     | Normal     | 45Sc (KED)  |
| 55Mn (KED)  | KED  | 0.03           | 3             | 0.1     | Normal     | 45Sc (KED)  |
| 56Fe (KED)  | KED  | 0.03           | 3             | 0.1     | Normal     | 45Sc (KED)  |
| 58Ni (KED)  | KED  | 0.03           | 3             | 0.1     | Normal     | 45Sc (KED)  |
| 59Co (KED)  | KED  | 0.03           | 3             | 0.1     | Normal     | 45Sc (KED)  |
| 63Cu (KED)  | KED  | 0.03           | 3             | 0.1     | Normal     | 89Y (KED)   |
| 64Zn (KED)  | KED  | 0.03           | 3             | 0.1     | Normal     | 89Y (KED)   |
| 69Ga (KED)  | KED  | 0.03           | 3             | 0.1     | Normal     | 89Y (KED)   |
| 75As (KED)  | KED  | 0.03           | 3             | 0.1     | Normal     | 89Y (KED)   |
| 80Se (KED)  | KED  | 0.03           | 3             | 0.1     | Normal     | 89Y (KED)   |
| 85Rb (KED)  | KED  | 0.03           | 3             | 0.1     | Normal     | 89Y (KED)   |
| 88Sr (KED)  | KED  | 0.03           | 3             | 0.1     | Normal     | 89Y (KED)   |
| 89Y (KED)   | KED  | 0.03           | 3             | 0.1     | Normal     |             |
| 107Ag (KED) | KED  | 0.03           | 3             | 0.1     | Normal     | 115In (KED) |
| 114Cd (KED) | KED  | 0.03           | 3             | 0.1     | Normal     | 115In (KED) |
| 115In (KED) | KED  | 0.03           | 3             | 0.1     | Normal     |             |
| 133Cs (KED) | KED  | 0.03           | 3             | 0.1     | Normal     | 115In (KED) |
| 138Ba (KED) | KED  | 0.03           | 3             | 0.1     | Normal     | 159Tb (KED) |
| 139La (KED) | KED  | 0.03           | 3             | 0.1     | Normal     | 159Tb (KED) |
| 140Ce (KED) | KED  | 0.03           | 3             | 0.1     | Normal     | 159Tb (KED) |
| 141Pr (KED) | KED  | 0.03           | 3             | 0.1     | Normal     | 159Tb (KED) |
| 142Nd (KED) | KED  | 0.03           | 3             | 0.1     | Normal     | 159Tb (KED) |
| 152Sm (KED) | KED  | 0.03           | 3             | 0.1     | Normal     | 159Tb (KED) |
| 153Eu (KED) | KED  | 0.03           | 3             | 0.1     | Normal     | 159Tb (KED) |
| 158Gd (KED) | KED  | 0.03           | 3             | 0.1     | Normal     | 159Tb (KED) |
| 159Tb (KED) | KED  | 0.03           | 3             | 0.1     | Normal     |             |
| 164Dy (KED) | KED  | 0.03           | 3             | 0.1     | Normal     | 159Tb (KED) |
| 166Er (KED) | KED  | 0.03           | 3             | 0.1     | Normal     | 159Tb (KED) |
| 169Tm (KED) | KED  | 0.03           | 3             | 0.1     | Normal     | 159Tb (KED) |
| 174Yb (KED) | KED  | 0.03           | 3             | 0.1     | Normal     | 159Tb (KED) |
| 175Lu (KED) | KED  | 0.03           | 3             | 0.1     | Normal     | 159Tb (KED) |
| 205Tl (KED) | KED  | 0.03           | 3             | 0.1     | Normal     | 209Bi (KED) |
| 208Pb (KED) | KED  | 0.03           | 3             | 0.1     | Normal     | 209Bi (KED) |
| 209Bi (KED) | KED  | 0.03           | 3             | 0.1     | Normal     |             |
| 232Th (KED) | KED  | 0.03           | 3             | 0.1     | Normal     | 209Bi (KED) |
| 238U (KED)  | KED  | 0.03           | 3             | 0.1     | Normal     | 209Bi (KED) |

| Isotope     | Mode | Dwell time (s) | # of Channels | Spacing | Resolution |
|-------------|------|----------------|---------------|---------|------------|
| 6Li (KED)   | KED  | 0.03           | 3             | 0.1     | Normal     |
| 45Sc (KED)  | KED  | 0.03           | 3             | 0.1     | Normal     |
| 89Y (KED)   | KED  | 0.03           | 3             | 0.1     | Normal     |
| 115In (KED) | KED  | 0.03           | 3             | 0.1     | Normal     |
| 159Tb (KED) | KED  | 0.03           | 3             | 0.1     | Normal     |
| 209Bi (KED) | KED  | 0.03           | 3             | 0.1     | Normal     |

| No. of sweeps | Time per sweep[s] | Time per main run[s] |
|---------------|-------------------|----------------------|
| 10            | 3.87              | 38.7                 |

## Calibration Curves:

9Be (KED)

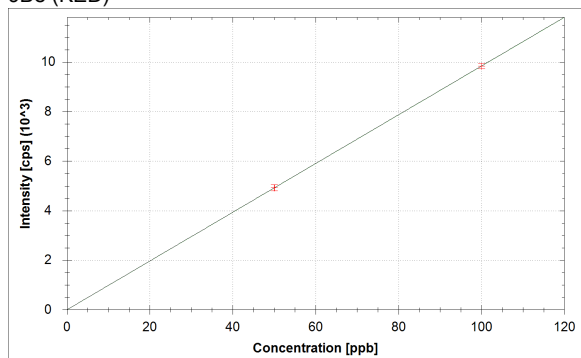

$$f(x) = 98.3842 \cdot x$$

$$R^2 = 1.0000$$

$$\text{BEC} = 0.000 \text{ ppb}$$

$$\text{LoD} = 0.0000 \text{ ppb}$$

11B (KED)

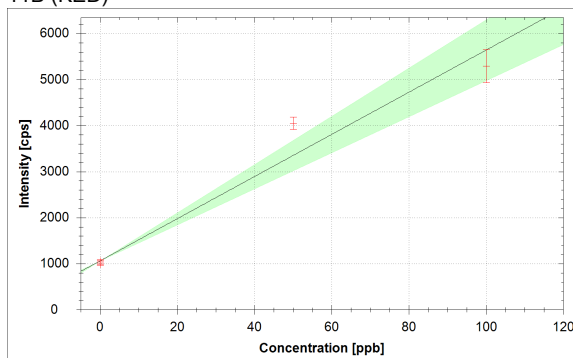

$$f(x) = 45.7713 \cdot x + 1063.0507$$

$$R^2 = 0.9565$$

$$\text{BEC} = 23.225 \text{ ppb}$$

$$\text{LoD} = 1.4931 \text{ ppb}$$

24Mg (KED)

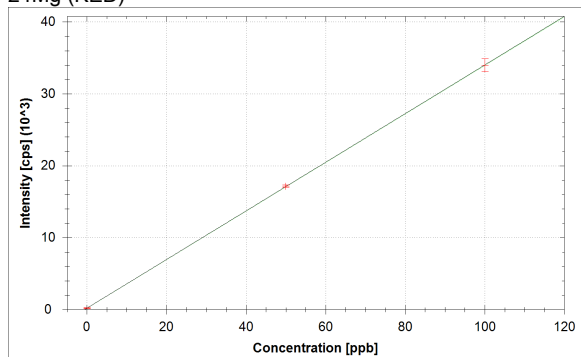

$$f(x) = 338.1452 \cdot x + 187.7338$$

$$R^2 = 1.0000$$

$$\text{BEC} = 0.555 \text{ ppb}$$

$$\text{LoD} = 0.4459 \text{ ppb}$$

27Al (KED)

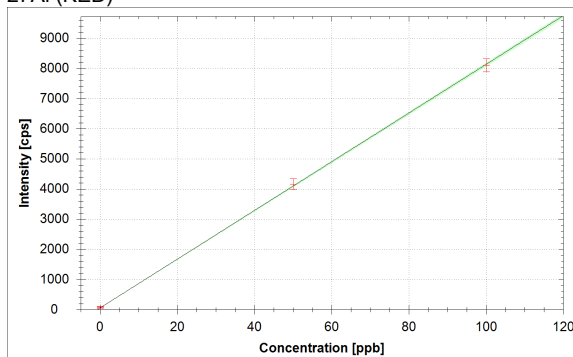

$$f(x) = 80.7570 \cdot x + 59.2340$$

$$R^2 = 0.9999$$

$$\text{BEC} = 0.733 \text{ ppb}$$

$$\text{LoD} = 1.0536 \text{ ppb}$$

51V (KED)

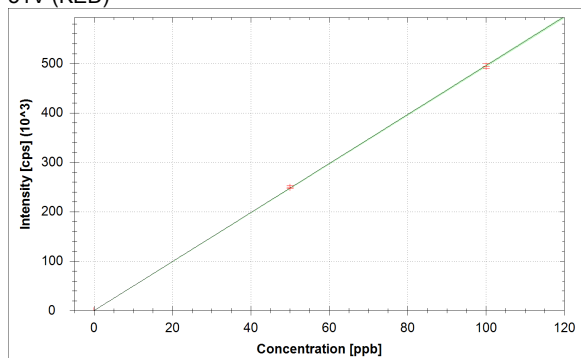

$$f(x) = 4954.6710 \cdot x + 4.4186$$

$$R^2 = 1.0000$$

$$\text{BEC} = 0.001 \text{ ppb}$$

$$\text{LoD} = 0.0000 \text{ ppb}$$

52Cr (KED)

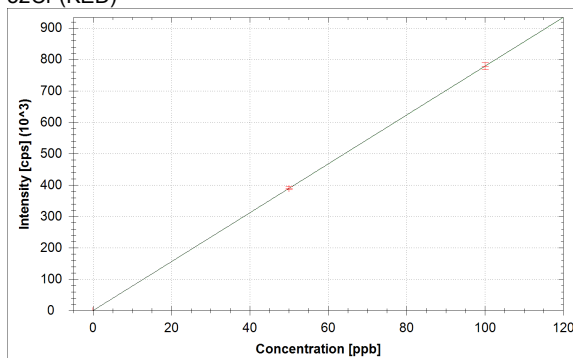

$$f(x) = 7788.4258 \cdot x + 77.7506$$

$$R^2 = 1.0000$$

$$\text{BEC} = 0.010 \text{ ppb}$$

$$\text{LoD} = 0.0079 \text{ ppb}$$

55Mn (KED)

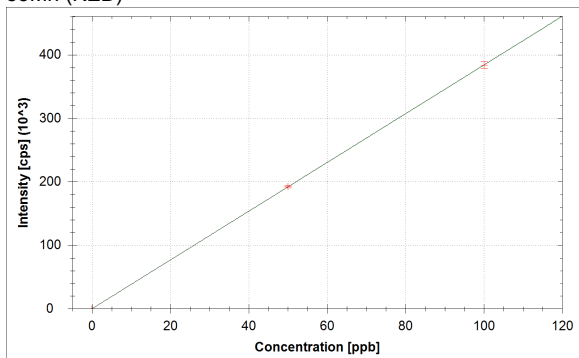

$$f(x) = 3839.1973 \cdot x + 78.2800$$

$$R^2 = 1.0000$$

$$\text{BEC} = 0.020 \text{ ppb}$$

$$\text{LoD} = 0.0019 \text{ ppb}$$

56Fe (KED)

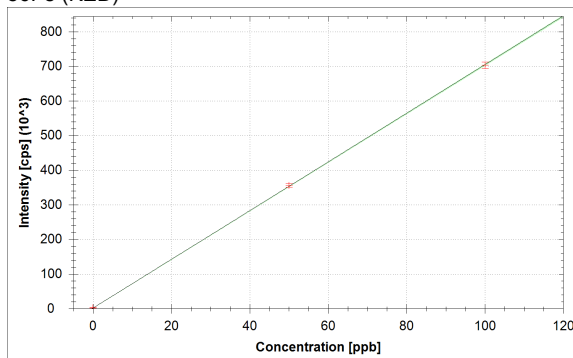

$$f(x) = 7030.6679 \cdot x + 2026.4597$$

$$R^2 = 1.0000$$

$$\text{BEC} = 0.288 \text{ ppb}$$

$$\text{LoD} = 0.2801 \text{ ppb}$$

58Ni (KED)

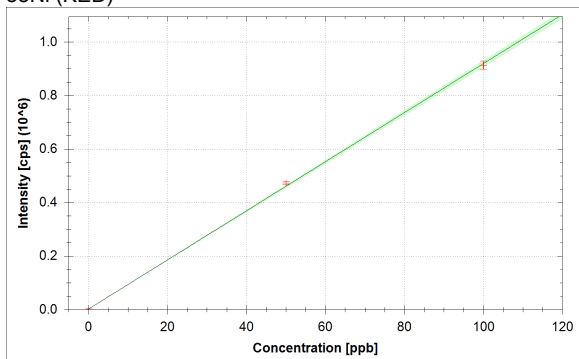

$$f(x) = 9170.2681 \cdot x + 2012.4044$$

$$R^2 = 0.9997$$

$$\text{BEC} = 0.219 \text{ ppb}$$

$$\text{LoD} = 0.0289 \text{ ppb}$$

59Co (KED)

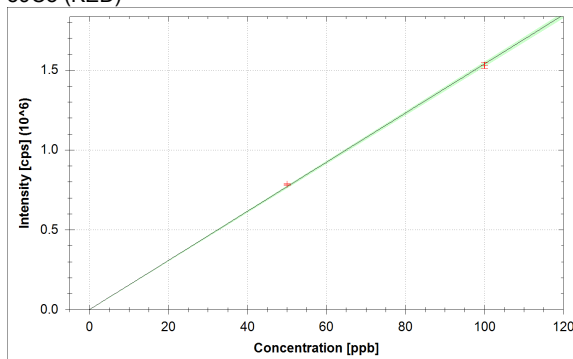

$$f(x) = 15378.3690 \cdot x + 38.0126$$

$$R^2 = 0.9998$$

$$\text{BEC} = 0.002 \text{ ppb}$$

$$\text{LoD} = 0.0019 \text{ ppb}$$

63Cu (KED)

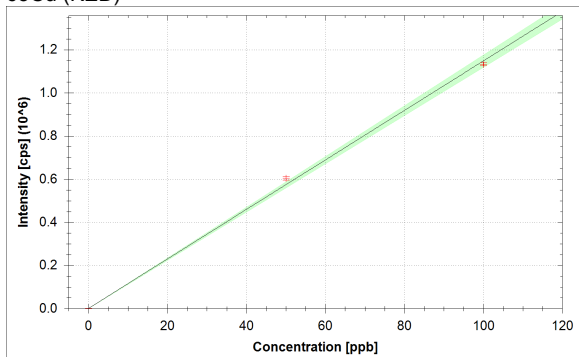

$$f(x) = 11472.6053 \cdot x + 658.9401$$

$$R^2 = 0.9987$$

$$\text{BEC} = 0.057 \text{ ppb}$$

$$\text{LoD} = 0.0174 \text{ ppb}$$

64Zn (KED)

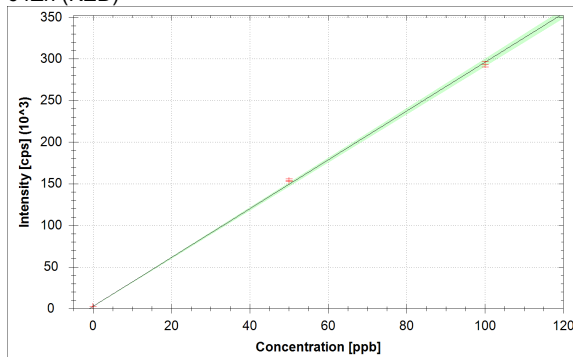

$$f(x) = 2932.5564 \cdot x + 2647.2386$$

$$R^2 = 0.9995$$

$$\text{BEC} = 0.903 \text{ ppb}$$

$$\text{LoD} = 0.0995 \text{ ppb}$$

69Ga (KED)

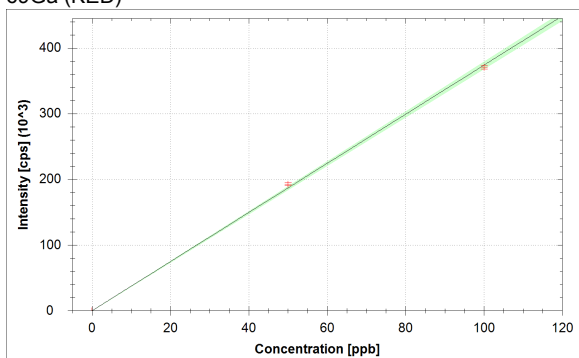

$$f(x) = 3737.3731 \cdot x + 42.5926$$

$$R^2 = 0.9996$$

$$\text{BEC} = 0.011 \text{ ppb}$$

$$\text{LoD} = 0.0059 \text{ ppb}$$

75As (KED)

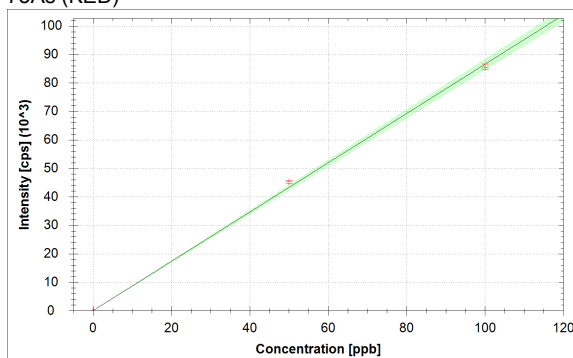

$$f(x) = 865.2015 \cdot x + 16.4003$$

$$R^2 = 0.9990$$

$$\text{BEC} = 0.019 \text{ ppb}$$

$$\text{LoD} = 0.0125 \text{ ppb}$$

80Se (KED)

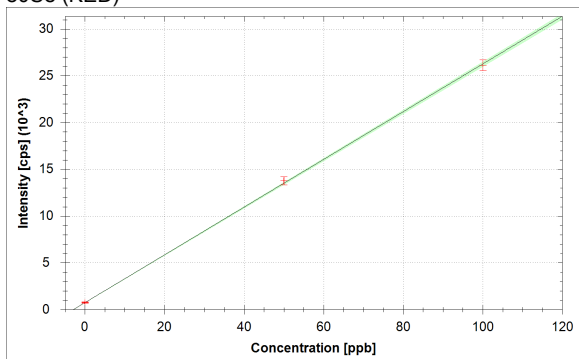

$$f(x) = 255.1213 \cdot x + 743.4148$$

$$R^2 = 0.9998$$

$$\text{BEC} = 2.914 \text{ ppb}$$

$$\text{LoD} = 0.9114 \text{ ppb}$$

85Rb (KED)

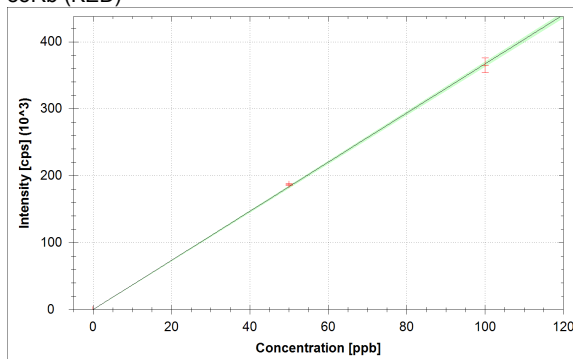

$$f(x) = 3667.1830 \cdot x + 20.7923$$

$$R^2 = 0.9998$$

$$\text{BEC} = 0.006 \text{ ppb}$$

$$\text{LoD} = 0.0108 \text{ ppb}$$

88Sr (KED)

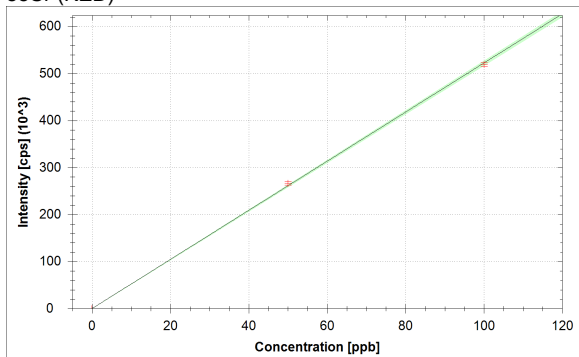

$$f(x) = 5223.6026 \cdot x + 99.3948$$

$$R^2 = 0.9998$$

$$\text{BEC} = 0.019 \text{ ppb}$$

$$\text{LoD} = 0.0119 \text{ ppb}$$

107Ag (KED)

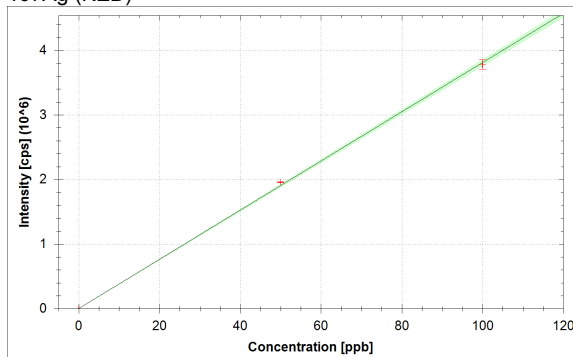

$$f(x) = 38103.1485 \cdot x + 187.3263$$

$$R^2 = 0.9997$$

$$\text{BEC} = 0.005 \text{ ppb}$$

$$\text{LoD} = 0.0021 \text{ ppb}$$

114Cd (KED)

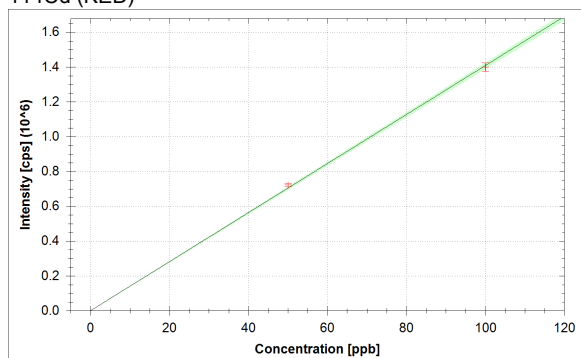

$$f(x) = 14083.2037 \cdot x + 65.2245$$

$$R^2 = 0.9997$$

$$\text{BEC} = 0.005 \text{ ppb}$$

$$\text{LoD} = 0.0045 \text{ ppb}$$

133Cs (KED)

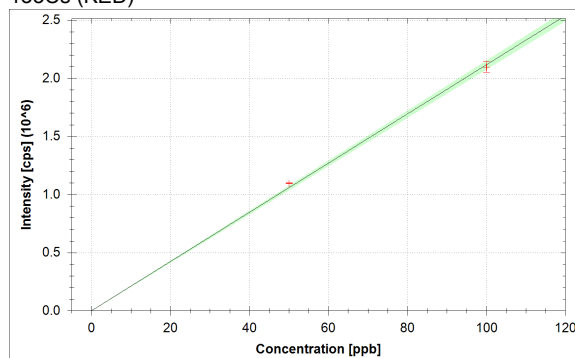

$$f(x) = 21153.1786 \cdot x + 27.1977$$

$$R^2 = 0.9994$$

$$\text{BEC} = 0.001 \text{ ppb}$$

$$\text{LoD} = 0.0016 \text{ ppb}$$

138Ba (KED)

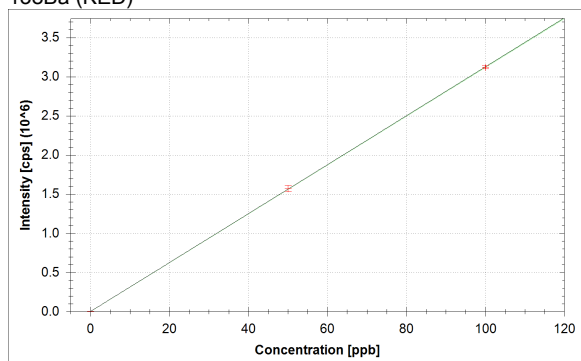

$$f(x) = 31235.3745 \cdot x + 985.1486$$

$$R^2 = 1.0000$$

$$\text{BEC} = 0.032 \text{ ppb}$$

$$\text{LoD} = 0.0144 \text{ ppb}$$

139La (KED)

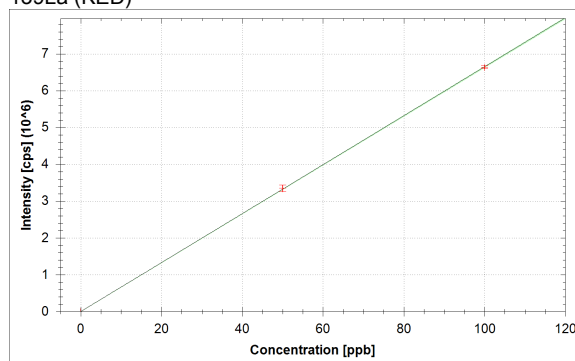

$$f(x) = 66465.3792 \cdot x + 89.8914$$

$$R^2 = 1.0000$$

$$\text{BEC} = 0.001 \text{ ppb}$$

$$\text{LoD} = 0.0010 \text{ ppb}$$

140Ce (KED)

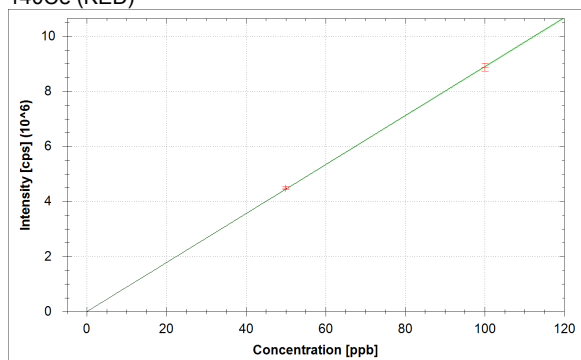

$$f(x) = 88938.1592 \cdot x + 153.4077$$

$$R^2 = 1.0000$$

$$\text{BEC} = 0.002 \text{ ppb}$$

$$\text{LoD} = 0.0016 \text{ ppb}$$

141Pr (KED)

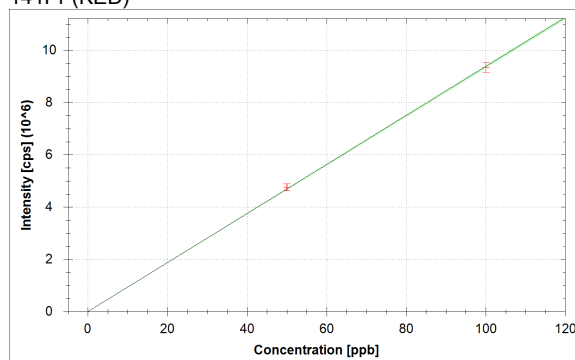

$$f(x) = 93792.2635 \cdot x + 84.4066$$

$$R^2 = 0.9999$$

$$\text{BEC} = 0.001 \text{ ppb}$$

$$\text{LoD} = 0.0007 \text{ ppb}$$

142Nd (KED)

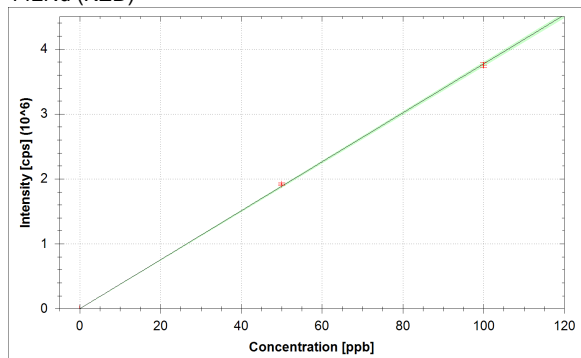

$$f(x) = 37692.1392 \cdot x + 62.4481$$

$$R^2 = 0.9998$$

$$\text{BEC} = 0.002 \text{ ppb}$$

$$\text{LoD} = 0.0004 \text{ ppb}$$

152Sm (KED)

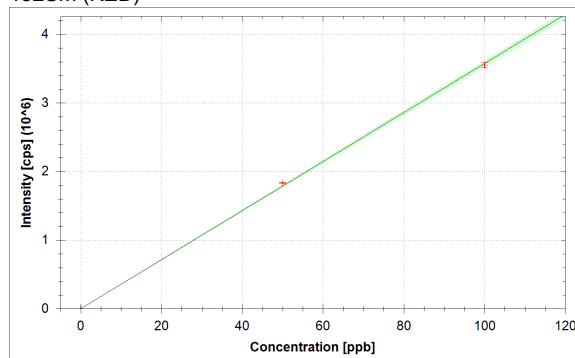

$$f(x) = 35743.2284 \cdot x + 24.0849$$

$$R^2 = 0.9997$$

$$\text{BEC} = 0.001 \text{ ppb}$$

$$\text{LoD} = 0.0007 \text{ ppb}$$

153Eu (KED)

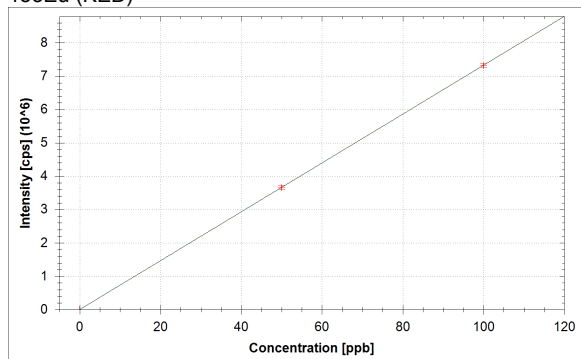

$$f(x) = 73287.6137 \cdot x + 47.1563$$

$$R^2 = 1.0000$$

$$\text{BEC} = 0.001 \text{ ppb}$$

$$\text{LoD} = 0.0010 \text{ ppb}$$

158Gd (KED)

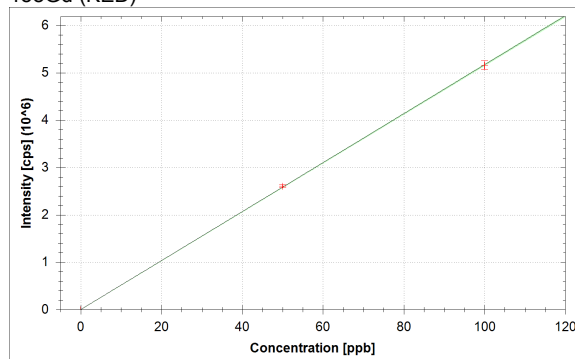

$$f(x) = 51672.3569 \cdot x + 37.3544$$

$$R^2 = 1.0000$$

$$\text{BEC} = 0.001 \text{ ppb}$$

$$\text{LoD} = 0.0003 \text{ ppb}$$

164Dy (KED)

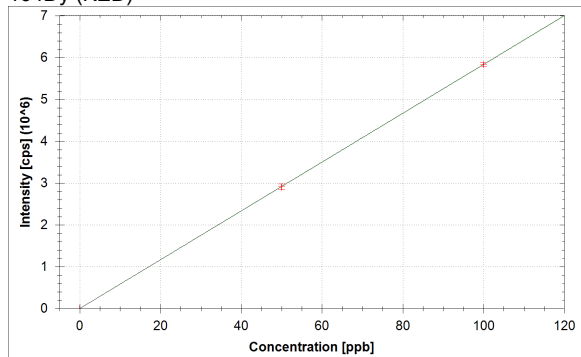

$$f(x) = 58382.0795 \cdot x + 49.3173$$

$$R^2 = 1.0000$$

$$\text{BEC} = 0.001 \text{ ppb}$$

$$\text{LoD} = 0.0012 \text{ ppb}$$

166Er (KED)

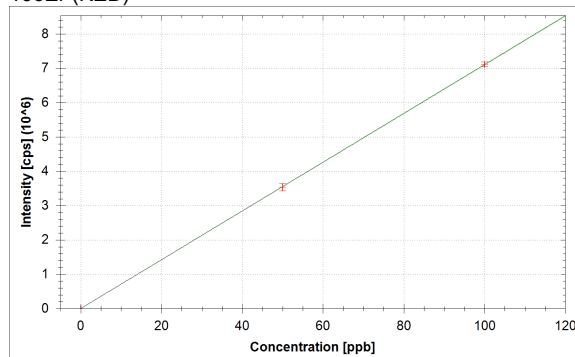

$$f(x) = 71072.2183 \cdot x + 663.3407$$

$$R^2 = 1.0000$$

$$\text{BEC} = 0.009 \text{ ppb}$$

$$\text{LoD} = 0.0034 \text{ ppb}$$

169Tm (KED)

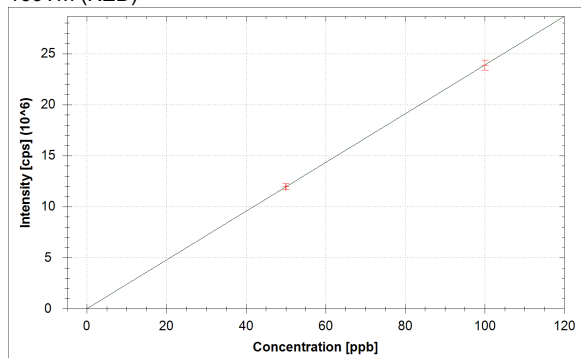

$$f(x) = 238752.6167 \cdot x + 161.2924$$

$$R^2 = 1.0000$$

$$\text{BEC} = 0.001 \text{ ppb}$$

$$\text{LoD} = 0.0002 \text{ ppb}$$

174Yb (KED)

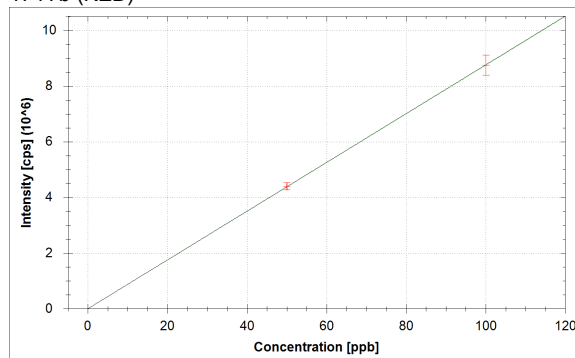

$$f(x) = 87637.8760 \cdot x + 93.0613$$

$$R^2 = 1.0000$$

$$\text{BEC} = 0.001 \text{ ppb}$$

$$\text{LoD} = 0.0008 \text{ ppb}$$

175Lu (KED)

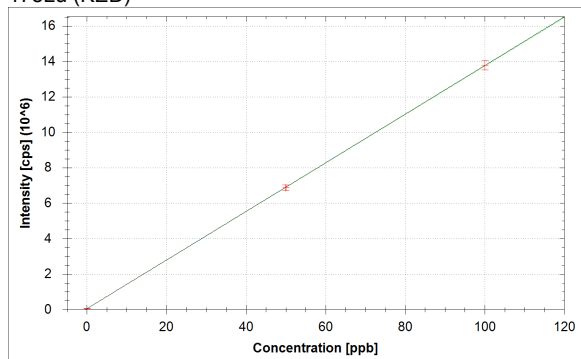

$$f(x) = 137080.5560 \cdot x + 49624.3159$$

$$R^2 = 1.0000$$

$$\text{BEC} = 0.362 \text{ ppb}$$

$$\text{LoD} = 0.0220 \text{ ppb}$$

205Tl (KED)

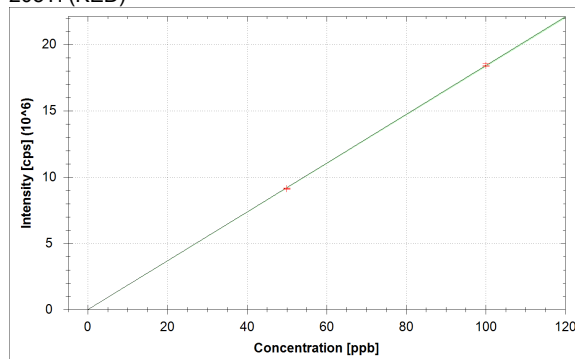

$$f(x) = 184057.1226 \cdot x + 117.1528$$

$$R^2 = 1.0000$$

$$\text{BEC} = 0.001 \text{ ppb}$$

$$\text{LoD} = 0.0006 \text{ ppb}$$

208Pb (KED)

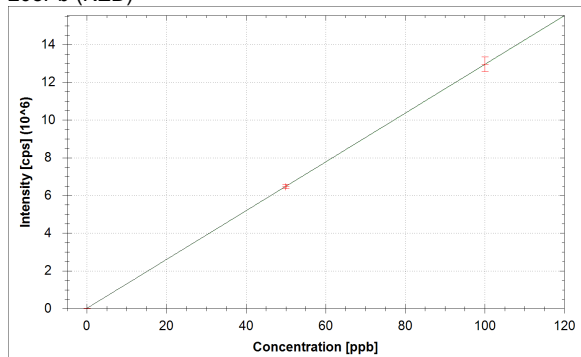

$$f(x) = 129333.6561 \cdot x + 14963.2120$$

$$R^2 = 1.0000$$

$$\text{BEC} = 0.116 \text{ ppb}$$

$$\text{LoD} = 0.0122 \text{ ppb}$$

232Th (KED)

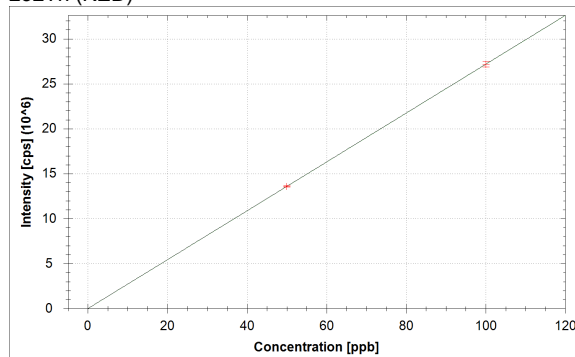

$$f(x) = 271794.4336 \cdot x + 346.3888$$

$$R^2 = 1.0000$$

$$\text{BEC} = 0.001 \text{ ppb}$$

$$\text{LoD} = 0.0004 \text{ ppb}$$

238U (KED)

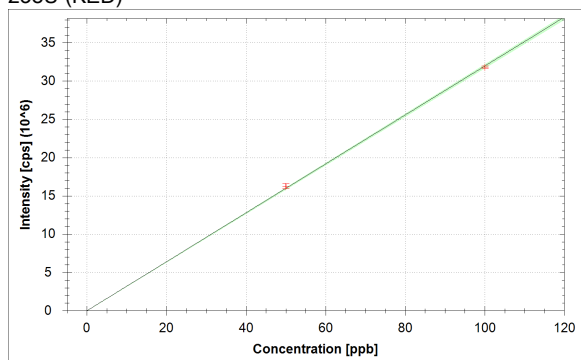

$$f(x) = 319549.7214 \cdot x + 257.9338$$

$$R^2 = 0.9999$$

$$\text{BEC} = 0.001 \text{ ppb}$$

$$\text{LoD} = 0.0006 \text{ ppb}$$

**Standards:**

Analysis Index: 3  
 Analysis Name: 0+20  
 Analysis Type: STD  
 Analysis Started at: 9/26/2021 2:40:20 PM  
 Standard (Stock): std0  
 Standard DF: 1

| Category    | Concentration average | Concentration RSD | Standard Concentration |
|-------------|-----------------------|-------------------|------------------------|
| 6Li (KED)   | 96.027 %              |                   |                        |
| 9Be (KED)   | 0.000 ppb             |                   | 0.000 ppb              |
| 11B (KED)   | 0.000 ppb             | 0.0 %             | 0.000 ppb              |
| 24Mg (KED)  | 0.000 ppb             | 0.1 %             | 0.000 ppb              |
| 27Al (KED)  | 0.000 ppb             | 0.5 %             | 0.000 ppb              |
| 45Sc (KED)  | 102.354 %             |                   |                        |
| 51V (KED)   | 0.000 ppb             | 1.2 %             | 0.000 ppb              |
| 52Cr (KED)  | 0.000 ppb             | 0.3 %             | 0.000 ppb              |
| 55Mn (KED)  | 0.000 ppb             | 0.2 %             | 0.000 ppb              |
| 56Fe (KED)  | 0.000 ppb             | 0.0 %             | 0.000 ppb              |
| 58Ni (KED)  | 0.000 ppb             | 0.0 %             | 0.000 ppb              |
| 59Co (KED)  | 0.000 ppb             | 0.2 %             | 0.000 ppb              |
| 63Cu (KED)  | 0.000 ppb             | 0.1 %             | 0.000 ppb              |
| 64Zn (KED)  | 0.000 ppb             | 0.0 %             | 0.000 ppb              |
| 69Ga (KED)  | 0.000 ppb             | 0.2 %             | 0.000 ppb              |
| 75As (KED)  | 0.000 ppb             | 0.2 %             | 0.000 ppb              |
| 80Se (KED)  | 0.000 ppb             | 0.0 %             | 0.000 ppb              |
| 85Rb (KED)  | 0.000 ppb             | 0.2 %             | 0.000 ppb              |
| 88Sr (KED)  | 0.000 ppb             | 0.2 %             | 0.000 ppb              |
| 89Y (KED)   | 101.646 %             |                   |                        |
| 107Ag (KED) | 0.000 ppb             | 0.1 %             | 0.000 ppb              |
| 114Cd (KED) | 0.000 ppb             | 0.2 %             | 0.000 ppb              |
| 115In (KED) | 102.081 %             |                   |                        |
| 133Cs (KED) | 0.000 ppb             | 0.2 %             | 0.000 ppb              |
| 138Ba (KED) | 0.000 ppb             | 0.1 %             | 0.000 ppb              |
| 139La (KED) | 0.000 ppb             | 0.1 %             | 0.000 ppb              |
| 140Ce (KED) | 0.000 ppb             | 0.1 %             | 0.000 ppb              |
| 141Pr (KED) | 0.000 ppb             | 0.0 %             | 0.000 ppb              |
| 142Nd (KED) | 0.000 ppb             | 0.4 %             | 0.000 ppb              |
| 152Sm (KED) | 0.000 ppb             | 0.3 %             | 0.000 ppb              |
| 153Eu (KED) | 0.000 ppb             | 0.1 %             | 0.000 ppb              |
| 158Gd (KED) | 0.000 ppb             | 0.4 %             | 0.000 ppb              |
| 159Tb (KED) | 101.360 %             |                   |                        |
| 164Dy (KED) | 0.000 ppb             | 0.5 %             | 0.000 ppb              |
| 166Er (KED) | 0.000 ppb             | 0.1 %             | 0.000 ppb              |
| 169Tm (KED) | 0.000 ppb             | 0.2 %             | 0.000 ppb              |
| 174Yb (KED) | 0.000 ppb             | 0.5 %             | 0.000 ppb              |
| 175Lu (KED) | 0.000 ppb             | 0.0 %             | 0.000 ppb              |
| 205Tl (KED) | 0.000 ppb             | 0.2 %             | 0.000 ppb              |
| 208Pb (KED) | 0.000 ppb             | 0.0 %             | 0.000 ppb              |
| 209Bi (KED) | 101.695 %             |                   |                        |
| 232Th (KED) | 0.000 ppb             | 0.0 %             | 0.000 ppb              |
| 238U (KED)  | 0.000 ppb             | 0.1 %             | 0.000 ppb              |

**Standards:**

Analysis Index: 4  
 Analysis Name: 50+20  
 Analysis Type: STD  
 Analysis Started at: 9/26/2021 2:43:35 PM  
 Standard (Stock): std1  
 Standard DF: 1

| Category    | Concentration average | Concentration RSD | Standard Concentration |
|-------------|-----------------------|-------------------|------------------------|
| 6Li (KED)   | 101.792 %             |                   |                        |
| 9Be (KED)   | 50.051 ppb            | 2.6 %             | 50.000 ppb             |
| 11B (KED)   | 65.212 ppb            | 4.5 %             | 50.000 ppb             |
| 24Mg (KED)  | 50.191 ppb            | 1.0 %             | 50.000 ppb             |
| 27Al (KED)  | 50.774 ppb            | 4.4 %             | 50.000 ppb             |
| 45Sc (KED)  | 103.680 %             |                   |                        |
| 51V (KED)   | 50.467 ppb            | 1.0 %             | 50.000 ppb             |
| 52Cr (KED)  | 50.074 ppb            | 1.2 %             | 50.000 ppb             |
| 55Mn (KED)  | 50.118 ppb            | 1.1 %             | 50.000 ppb             |
| 56Fe (KED)  | 50.369 ppb            | 1.6 %             | 50.000 ppb             |
| 58Ni (KED)  | 51.350 ppb            | 1.1 %             | 50.000 ppb             |
| 59Co (KED)  | 50.995 ppb            | 0.7 %             | 50.000 ppb             |
| 63Cu (KED)  | 52.648 ppb            | 1.4 %             | 50.000 ppb             |
| 64Zn (KED)  | 51.591 ppb            | 1.1 %             | 50.000 ppb             |
| 69Ga (KED)  | 51.556 ppb            | 1.3 %             | 50.000 ppb             |
| 75As (KED)  | 52.279 ppb            | 1.2 %             | 50.000 ppb             |
| 80Se (KED)  | 51.035 ppb            | 3.3 %             | 50.000 ppb             |
| 85Rb (KED)  | 51.032 ppb            | 0.8 %             | 50.000 ppb             |
| 88Sr (KED)  | 51.018 ppb            | 1.5 %             | 50.000 ppb             |
| 89Y (KED)   | 102.632 %             |                   |                        |
| 107Ag (KED) | 51.340 ppb            | 0.5 %             | 50.000 ppb             |
| 114Cd (KED) | 51.253 ppb            | 1.3 %             | 50.000 ppb             |
| 115In (KED) | 102.386 %             |                   |                        |
| 133Cs (KED) | 51.842 ppb            | 0.4 %             | 50.000 ppb             |
| 138Ba (KED) | 50.262 ppb            | 2.2 %             | 50.000 ppb             |
| 139La (KED) | 50.352 ppb            | 2.7 %             | 50.000 ppb             |
| 140Ce (KED) | 50.456 ppb            | 1.2 %             | 50.000 ppb             |
| 141Pr (KED) | 50.623 ppb            | 2.8 %             | 50.000 ppb             |
| 142Nd (KED) | 50.907 ppb            | 0.9 %             | 50.000 ppb             |
| 152Sm (KED) | 51.306 ppb            | 0.5 %             | 50.000 ppb             |
| 153Eu (KED) | 50.020 ppb            | 1.6 %             | 50.000 ppb             |
| 158Gd (KED) | 50.397 ppb            | 1.3 %             | 50.000 ppb             |
| 159Tb (KED) | 103.731 %             |                   |                        |
| 164Dy (KED) | 49.857 ppb            | 2.5 %             | 50.000 ppb             |
| 166Er (KED) | 49.718 ppb            | 3.0 %             | 50.000 ppb             |
| 169Tm (KED) | 50.019 ppb            | 2.4 %             | 50.000 ppb             |
| 174Yb (KED) | 50.191 ppb            | 3.0 %             | 50.000 ppb             |
| 175Lu (KED) | 49.707 ppb            | 2.3 %             | 50.000 ppb             |
| 205Tl (KED) | 49.629 ppb            | 0.5 %             | 50.000 ppb             |
| 208Pb (KED) | 49.898 ppb            | 1.7 %             | 50.000 ppb             |
| 209Bi (KED) | 103.467 %             |                   |                        |
| 232Th (KED) | 50.040 ppb            | 0.7 %             | 50.000 ppb             |
| 238U (KED)  | 50.817 ppb            | 2.0 %             | 50.000 ppb             |

**Standards:**

Analysis Index: 5  
 Analysis Name: 100+20  
 Analysis Type: STD  
 Analysis Started at: 9/26/2021 2:46:59 PM  
 Standard (Stock): std2  
 Standard DF: 1

| Category    | Concentration average | Concentration RSD | Standard Concentration |
|-------------|-----------------------|-------------------|------------------------|
| 6Li (KED)   | 98.595 %              |                   |                        |
| 9Be (KED)   | 99.974 ppb            | 1.1 %             | 100.000 ppb            |
| 11B (KED)   | 92.394 ppb            | 8.6 %             | 100.000 ppb            |
| 24Mg (KED)  | 99.904 ppb            | 2.6 %             | 100.000 ppb            |
| 27Al (KED)  | 99.613 ppb            | 2.7 %             | 100.000 ppb            |
| 45Sc (KED)  | 102.285 %             |                   |                        |
| 51V (KED)   | 99.767 ppb            | 1.0 %             | 100.000 ppb            |
| 52Cr (KED)  | 99.963 ppb            | 1.4 %             | 100.000 ppb            |
| 55Mn (KED)  | 99.941 ppb            | 1.4 %             | 100.000 ppb            |
| 56Fe (KED)  | 99.815 ppb            | 1.3 %             | 100.000 ppb            |
| 58Ni (KED)  | 99.325 ppb            | 1.7 %             | 100.000 ppb            |
| 59Co (KED)  | 99.502 ppb            | 1.2 %             | 100.000 ppb            |
| 63Cu (KED)  | 98.676 ppb            | 0.6 %             | 100.000 ppb            |
| 64Zn (KED)  | 99.204 ppb            | 1.2 %             | 100.000 ppb            |
| 69Ga (KED)  | 99.222 ppb            | 0.8 %             | 100.000 ppb            |
| 75As (KED)  | 98.861 ppb            | 1.2 %             | 100.000 ppb            |
| 80Se (KED)  | 99.482 ppb            | 2.3 %             | 100.000 ppb            |
| 85Rb (KED)  | 99.484 ppb            | 3.0 %             | 100.000 ppb            |
| 88Sr (KED)  | 99.491 ppb            | 0.8 %             | 100.000 ppb            |
| 89Y (KED)   | 103.038 %             |                   |                        |
| 107Ag (KED) | 99.330 ppb            | 2.0 %             | 100.000 ppb            |
| 114Cd (KED) | 99.374 ppb            | 1.8 %             | 100.000 ppb            |
| 115In (KED) | 102.343 %             |                   |                        |
| 133Cs (KED) | 99.079 ppb            | 2.3 %             | 100.000 ppb            |
| 138Ba (KED) | 99.869 ppb            | 0.6 %             | 100.000 ppb            |
| 139La (KED) | 99.824 ppb            | 0.5 %             | 100.000 ppb            |
| 140Ce (KED) | 99.772 ppb            | 1.6 %             | 100.000 ppb            |
| 141Pr (KED) | 99.689 ppb            | 2.0 %             | 100.000 ppb            |
| 142Nd (KED) | 99.547 ppb            | 1.0 %             | 100.000 ppb            |
| 152Sm (KED) | 99.347 ppb            | 0.9 %             | 100.000 ppb            |
| 153Eu (KED) | 99.990 ppb            | 0.8 %             | 100.000 ppb            |
| 158Gd (KED) | 99.802 ppb            | 1.8 %             | 100.000 ppb            |
| 159Tb (KED) | 101.726 %             |                   |                        |
| 164Dy (KED) | 100.071 ppb           | 0.8 %             | 100.000 ppb            |
| 166Er (KED) | 100.141 ppb           | 0.9 %             | 100.000 ppb            |
| 169Tm (KED) | 99.991 ppb            | 2.1 %             | 100.000 ppb            |
| 174Yb (KED) | 99.905 ppb            | 4.1 %             | 100.000 ppb            |
| 175Lu (KED) | 100.147 ppb           | 2.0 %             | 100.000 ppb            |
| 205Tl (KED) | 100.185 ppb           | 0.6 %             | 100.000 ppb            |
| 208Pb (KED) | 100.051 ppb           | 2.9 %             | 100.000 ppb            |
| 209Bi (KED) | 101.858 %             |                   |                        |
| 232Th (KED) | 99.980 ppb            | 1.1 %             | 100.000 ppb            |
| 238U (KED)  | 99.592 ppb            | 0.4 %             | 100.000 ppb            |

## Sample List Summary:

Instrument ID: iCAP Q

| Index: | Label:             | Main<br>Runs: | Survey<br>Runs: | Start Time:          | User name:                    |
|--------|--------------------|---------------|-----------------|----------------------|-------------------------------|
| 1      | water              | 3             | 0               | 9/26/2021 2:34:01 PM | WINDOWS-UPCI4ER\Administrator |
| 2      | blk                | 3             | 0               | 9/26/2021 2:36:57 PM | WINDOWS-UPCI4ER\Administrator |
| 3      | 0+20               | 3             | 0               | 9/26/2021 2:40:20 PM | WINDOWS-UPCI4ER\Administrator |
| 4      | 50+20              | 3             | 0               | 9/26/2021 2:43:35 PM | WINDOWS-UPCI4ER\Administrator |
| 5      | 100+20             | 3             | 0               | 9/26/2021 2:46:59 PM | WINDOWS-UPCI4ER\Administrator |
| 6      | 038633(00030)jian  | 3             | 0               | 9/26/2021 2:50:28 PM | WINDOWS-UPCI4ER\Administrator |
| 7      | 163962(178573)jian | 3             | 0               | 9/26/2021 2:53:59 PM | WINDOWS-UPCI4ER\Administrator |
| 8      | 048711(179417)jian | 3             | 0               | 9/26/2021 2:58:00 PM | WINDOWS-UPCI4ER\Administrator |
| 9      | 016779(178595)jian | 3             | 0               | 9/26/2021 3:01:42 PM | WINDOWS-UPCI4ER\Administrator |
| 10     | 038918(27797)jian  | 3             | 0               | 9/26/2021 3:05:08 PM | WINDOWS-UPCI4ER\Administrator |
| 11     | 179398jian         | 3             | 0               | 9/26/2021 3:08:28 PM | WINDOWS-UPCI4ER\Administrator |
| 12     | 038928(178605)jian | 3             | 0               | 9/26/2021 3:11:58 PM | WINDOWS-UPCI4ER\Administrator |
| 13     | 083632(00019)jian  | 3             | 0               | 9/26/2021 3:15:24 PM | WINDOWS-UPCI4ER\Administrator |
| 14     | 051979(179210)jian | 3             | 0               | 9/26/2021 3:18:46 PM | WINDOWS-UPCI4ER\Administrator |
| 15     | 04658(00024)jian   | 3             | 0               | 9/26/2021 3:22:10 PM | WINDOWS-UPCI4ER\Administrator |
| 16     | 048645(00021)jian  | 3             | 0               | 9/26/2021 3:25:52 PM | WINDOWS-UPCI4ER\Administrator |
| 17     | 038769(00022)jian  | 3             | 0               | 9/26/2021 3:29:20 PM | WINDOWS-UPCI4ER\Administrator |
| 18     | 038625(00023)jian  | 3             | 0               | 9/26/2021 3:32:49 PM | WINDOWS-UPCI4ER\Administrator |
| 19     | 047180jian         | 3             | 0               | 9/26/2021 3:36:16 PM | WINDOWS-UPCI4ER\Administrator |
| 20     | 048656jian         | 3             | 0               | 9/26/2021 3:39:35 PM | WINDOWS-UPCI4ER\Administrator |
| 21     | 028731jian         | 3             | 0               | 9/26/2021 3:43:01 PM | WINDOWS-UPCI4ER\Administrator |
| 22     | 18000061jian       | 3             | 0               | 9/26/2021 3:46:46 PM | WINDOWS-UPCI4ER\Administrator |
| 23     | 048618(18-107)jian | 3             | 0               | 9/26/2021 3:50:10 PM | WINDOWS-UPCI4ER\Administrator |
| 24     | 00013(99)jian      | 3             | 0               | 9/26/2021 3:53:29 PM | WINDOWS-UPCI4ER\Administrator |
| 25     | 038431(18-133)jian | 3             | 0               | 9/26/2021 3:56:51 PM | WINDOWS-UPCI4ER\Administrator |
| 26     | 032370(0003)jian   | 1             | 0               | 9/26/2021 4:00:17 PM | WINDOWS-UPCI4ER\Administrator |
| 27     | 00017(07)jian      | 1             | 0               | 9/26/2021 4:02:22 PM | WINDOWS-UPCI4ER\Administrator |
| 28     | 026333(0007)jian   | 1             | 0               | 9/26/2021 4:04:45 PM | WINDOWS-UPCI4ER\Administrator |
| 29     | 037725(0009)jian   | 1             | 0               | 9/26/2021 4:06:43 PM | WINDOWS-UPCI4ER\Administrator |

## Sample Summary

Instrument ID: iCAP Q

Analysis index: 1

Analysis name: water

Analysis started at: 9/26/2021 2:34:01 PM

User name: WINDOWS-UPCI4ER\Administrator

| Category    | Concentration average | Concentration RSD |
|-------------|-----------------------|-------------------|
| 6Li (KED)   | 0.121 %               | 69.3 %            |
| 9Be (KED)   | 15.547 ppb            | 173.2 %           |
| 11B (KED)   | 88.165 ppb            | 115.8 %           |
| 24Mg (KED)  | 80.865 ppb            | 76.9 %            |
| 27Al (KED)  | 70.336 ppb            | 175.0 %           |
| 45Sc (KED)  | 0.048 %               | 18.3 %            |
| 51V (KED)   | 4.067 ppb             | 91.0 %            |
| 52Cr (KED)  | 1.999 ppb             | 43.7 %            |
| 55Mn (KED)  | 2.436 ppb             | 47.4 %            |
| 56Fe (KED)  | 51.939 ppb            | 35.9 %            |
| 58Ni (KED)  | 384.573 ppb           | 18.7 %            |
| 59Co (KED)  | 0.277 ppb             | 89.0 %            |
| 63Cu (KED)  | Infinity ppb          |                   |
| 64Zn (KED)  | Infinity ppb          |                   |
| 69Ga (KED)  | Infinity ppb          |                   |
| 75As (KED)  | Infinity ppb          |                   |
| 80Se (KED)  | Infinity ppb          |                   |
| 89Y (KED)   | 0.000 %               |                   |
| 114Cd (KED) | Infinity ppb          |                   |
| 115In (KED) | 0.000 %               | 173.2 %           |
| 133Cs (KED) | Infinity ppb          |                   |
| 138Ba (KED) | Infinity ppb          |                   |
| 140Ce (KED) | Infinity ppb          |                   |
| 159Tb (KED) | 0.000 %               | 173.2 %           |
| 205Tl (KED) | 40.522 ppb            | 40.0 %            |
| 208Pb (KED) | 86.388 ppb            | 60.9 %            |
| 209Bi (KED) | 0.000 %               | 33.3 %            |
| 232Th (KED) | -0.001 ppb            | 0.0 %             |
| 238U (KED)  | 18.609 ppb            | 125.4 %           |

| Category   | Concentration average | Intensity average | Intensity RSD |
|------------|-----------------------|-------------------|---------------|
| 6Li (KED)  | 0.121 %               | 6 cps             | 69.3 %        |
| 9Be (KED)  | 15.547 ppb            | 1 cps             | 173.2 %       |
| 11B (KED)  | 88.165 ppb            | 7 cps             | 100.0 %       |
| 24Mg (KED) | 80.865 ppb            | 24 cps            | 43.8 %        |
| 27Al (KED) | 70.336 ppb            | 3 cps             | 173.2 %       |
| 45Sc (KED) | 0.048 %               | 28 cps            | 18.3 %        |
| 51V (KED)  | 4.067 ppb             | 9 cps             | 94.4 %        |
| 52Cr (KED) | 1.999 ppb             | 8 cps             | 49.5 %        |
| 55Mn (KED) | 2.436 ppb             | 4 cps             | 43.3 %        |
| 56Fe (KED) | 51.939 ppb            | 183 cps           | 52.6 %        |
| 58Ni (KED) | 384.573 ppb           | 1,669 cps         | 3.3 %         |
| 59Co (KED) | 0.277 ppb             | 2 cps             | 86.6 %        |
| 63Cu (KED) | Infinity ppb          | 56 cps            | 40.0 %        |
| 64Zn (KED) | Infinity ppb          | 137 cps           | 8.4 %         |
| 69Ga (KED) | Infinity ppb          | 9 cps             | 43.3 %        |
| 75As (KED) | Infinity ppb          | 6 cps             | 34.6 %        |
| 80Se (KED) | Infinity ppb          | 674 cps           | 4.7 %         |
| 85Rb (KED) |                       | 4 cps             | 114.6 %       |
| 88Sr (KED) |                       | 6 cps             | 124.9 %       |

| Category    | Concentration average | Intensity average | Intensity RSD |
|-------------|-----------------------|-------------------|---------------|
| 89Y (KED)   | 0.000 %               | 0 cps             |               |
| 107Ag (KED) |                       | 2 cps             | 86.6 %        |
| 114Cd (KED) | Infinity ppb          | 6 cps             | 34.6 %        |
| 115In (KED) | 0.000 %               | 2 cps             | 173.2 %       |
| 133Cs (KED) | Infinity ppb          | 8 cps             | 65.5 %        |
| 138Ba (KED) | Infinity ppb          | 39 cps            | 38.7 %        |
| 139La (KED) |                       | 2 cps             | 173.2 %       |
| 140Ce (KED) | Infinity ppb          | 7 cps             | 50.0 %        |
| 141Pr (KED) |                       | 0 cps             |               |
| 142Nd (KED) |                       | 0 cps             |               |
| 152Sm (KED) |                       | 0 cps             |               |
| 153Eu (KED) |                       | 0 cps             |               |
| 158Gd (KED) |                       | 0 cps             |               |
| 159Tb (KED) | 0.000 %               | 1 cps             | 173.2 %       |
| 164Dy (KED) |                       | 0 cps             |               |
| 166Er (KED) |                       | 0 cps             |               |
| 169Tm (KED) |                       | 0 cps             |               |
| 174Yb (KED) |                       | 0 cps             |               |
| 175Lu (KED) |                       | 0 cps             |               |
| 205Tl (KED) | 40.522 ppb            | 19 cps            | 10.2 %        |
| 208Pb (KED) | 86.388 ppb            | 27 cps            | 33.1 %        |
| 209Bi (KED) | 0.000 %               | 20 cps            | 33.3 %        |
| 232Th (KED) | -0.001 ppb            | 0 cps             |               |
| 238U (KED)  | 18.609 ppb            | 12 cps            | 103.3 %       |

## Sample Summary

Instrument ID: iCAP Q

Analysis index: 2

Analysis name: blk

Analysis started at: 9/26/2021 2:36:57 PM

User name: WINDOWS-UPCI4ER\Administrator

| Category    | Concentration average | Concentration RSD |
|-------------|-----------------------|-------------------|
| 6Li (KED)   | 100.000 %             |                   |
| 9Be (KED)   | 0.000 ppb             |                   |
| 11B (KED)   | -1.669 ppb            | 29.8 %            |
| 24Mg (KED)  | 0.005 ppb             | 3,217.9 %         |
| 27Al (KED)  | 0.077 ppb             | 453.7 %           |
| 45Sc (KED)  | 100.000 %             |                   |
| 51V (KED)   | 0.000 ppb             | 2.4 %             |
| 52Cr (KED)  | 0.000 ppb             | 932.6 %           |
| 55Mn (KED)  | -0.002 ppb            | 39.3 %            |
| 56Fe (KED)  | 0.071 ppb             | 131.3 %           |
| 58Ni (KED)  | 0.007 ppb             | 140.1 %           |
| 59Co (KED)  | 0.000 ppb             | 185.7 %           |
| 63Cu (KED)  | 0.010 ppb             | 60.8 %            |
| 64Zn (KED)  | -0.036 ppb            | 92.7 %            |
| 69Ga (KED)  | -0.001 ppb            | 289.4 %           |
| 75As (KED)  | 0.000 ppb             | 1,188.9 %         |
| 80Se (KED)  | -0.009 ppb            | 3,292.7 %         |
| 85Rb (KED)  | 0.000 ppb             | 1,470.7 %         |
| 88Sr (KED)  | 0.005 ppb             | 86.9 %            |
| 89Y (KED)   | 100.000 %             |                   |
| 107Ag (KED) | 0.000 ppb             | 225.9 %           |
| 114Cd (KED) | 0.001 ppb             | 111.3 %           |
| 115In (KED) | 100.000 %             |                   |
| 133Cs (KED) | 0.001 ppb             | 51.3 %            |
| 138Ba (KED) | 0.004 ppb             | 128.2 %           |
| 139La (KED) | 0.000 ppb             | 191.1 %           |
| 140Ce (KED) | 0.001 ppb             | 106.9 %           |
| 141Pr (KED) | 0.000 ppb             | 97.7 %            |
| 142Nd (KED) | 0.000 ppb             | 68.1 %            |
| 152Sm (KED) | 0.000 ppb             | 340.3 %           |
| 153Eu (KED) | 0.000 ppb             | 390.2 %           |
| 158Gd (KED) | 0.000 ppb             | 290.4 %           |
| 159Tb (KED) | 100.000 %             |                   |
| 164Dy (KED) | 0.000 ppb             | 167.0 %           |
| 166Er (KED) | 0.001 ppb             | 107.7 %           |
| 169Tm (KED) | 0.000 ppb             | 75.3 %            |
| 174Yb (KED) | 0.000 ppb             | 1,129.8 %         |
| 175Lu (KED) | 0.034 ppb             | 21.3 %            |
| 205Tl (KED) | 0.000 ppb             | 134.1 %           |
| 208Pb (KED) | 0.000 ppb             | 2,041.8 %         |
| 209Bi (KED) | 100.000 %             |                   |
| 232Th (KED) | 0.000 ppb             | 50.1 %            |
| 238U (KED)  | 0.000 ppb             | 54.8 %            |

| Category   | Concentration average | Intensity average | Intensity RSD |
|------------|-----------------------|-------------------|---------------|
| 6Li (KED)  | 100.000 %             | 4,589 cps         | 2.1 %         |
| 9Be (KED)  | 0.000 ppb             | 0 cps             |               |
| 11B (KED)  | -1.669 ppb            | 987 cps           | 3.3 %         |
| 24Mg (KED) | 0.005 ppb             | 190 cps           | 28.9 %        |
| 27Al (KED) | 0.077 ppb             | 66 cps            | 43.8 %        |

| Category    | Concentration average | Intensity average | Intensity RSD |
|-------------|-----------------------|-------------------|---------------|
| 45Sc (KED)  | 100.000 %             | 57,394 cps        | 0.8 %         |
| 51V (KED)   | 0.000 ppb             | 3 cps             | 0.0 %         |
| 52Cr (KED)  | 0.000 ppb             | 80 cps            | 26.0 %        |
| 55Mn (KED)  | -0.002 ppb            | 72 cps            | 2.7 %         |
| 56Fe (KED)  | 0.071 ppb             | 2,527 cps         | 26.2 %        |
| 58Ni (KED)  | 0.007 ppb             | 2,076 cps         | 4.8 %         |
| 59Co (KED)  | 0.000 ppb             | 43 cps            | 23.1 %        |
| 63Cu (KED)  | 0.010 ppb             | 768 cps           | 7.4 %         |
| 64Zn (KED)  | -0.036 ppb            | 2,541 cps         | 2.3 %         |
| 69Ga (KED)  | -0.001 ppb            | 40 cps            | 16.7 %        |
| 75As (KED)  | 0.000 ppb             | 17 cps            | 20.0 %        |
| 80Se (KED)  | -0.009 ppb            | 741 cps           | 10.8 %        |
| 85Rb (KED)  | 0.000 ppb             | 20 cps            | 66.7 %        |
| 88Sr (KED)  | 0.005 ppb             | 123 cps           | 17.7 %        |
| 89Y (KED)   | 100.000 %             | 571,552 cps       | 1.6 %         |
| 107Ag (KED) | 0.000 ppb             | 199 cps           | 11.8 %        |
| 114Cd (KED) | 0.001 ppb             | 84 cps            | 26.3 %        |
| 115In (KED) | 100.000 %             | 1,177,884 cps     | 1.7 %         |
| 133Cs (KED) | 0.001 ppb             | 49 cps            | 21.9 %        |
| 138Ba (KED) | 0.004 ppb             | 1,101 cps         | 12.8 %        |
| 139La (KED) | 0.000 ppb             | 101 cps           | 22.0 %        |
| 140Ce (KED) | 0.001 ppb             | 199 cps           | 23.7 %        |
| 141Pr (KED) | 0.000 ppb             | 62 cps            | 35.7 %        |
| 142Nd (KED) | 0.000 ppb             | 54 cps            | 9.4 %         |
| 152Sm (KED) | 0.000 ppb             | 27 cps            | 33.1 %        |
| 153Eu (KED) | 0.000 ppb             | 53 cps            | 45.1 %        |
| 158Gd (KED) | 0.000 ppb             | 36 cps            | 14.3 %        |
| 159Tb (KED) | 100.000 %             | 7,324,663 cps     | 1.0 %         |
| 164Dy (KED) | 0.000 ppb             | 63 cps            | 36.8 %        |
| 166Er (KED) | 0.001 ppb             | 738 cps           | 10.3 %        |
| 169Tm (KED) | 0.000 ppb             | 137 cps           | 12.7 %        |
| 174Yb (KED) | 0.000 ppb             | 91 cps            | 25.7 %        |
| 175Lu (KED) | 0.034 ppb             | 54,345 cps        | 1.2 %         |
| 205Tl (KED) | 0.000 ppb             | 91 cps            | 37.4 %        |
| 208Pb (KED) | 0.000 ppb             | 14,987 cps        | 2.9 %         |
| 209Bi (KED) | 100.000 %             | 7,256,936 cps     | 0.7 %         |
| 232Th (KED) | 0.000 ppb             | 417 cps           | 9.0 %         |
| 238U (KED)  | 0.000 ppb             | 366 cps           | 16.5 %        |

## Sample Summary

Instrument ID: iCAP Q

Analysis index: 3

Analysis name: 0+20

Analysis started at: 9/26/2021 2:40:20 PM

User name: WINDOWS-UPCI4ER\Administrator

| Category    | Concentration average | Concentration RSD |
|-------------|-----------------------|-------------------|
| 6Li (KED)   | 96.027 %              |                   |
| 9Be (KED)   | 0.000 ppb             |                   |
| 11B (KED)   | 0.000 ppb             | 0.0 %             |
| 24Mg (KED)  | 0.000 ppb             | 0.1 %             |
| 27Al (KED)  | 0.000 ppb             | 0.5 %             |
| 45Sc (KED)  | 102.354 %             |                   |
| 51V (KED)   | 0.000 ppb             | 1.2 %             |
| 52Cr (KED)  | 0.000 ppb             | 0.3 %             |
| 55Mn (KED)  | 0.000 ppb             | 0.2 %             |
| 56Fe (KED)  | 0.000 ppb             | 0.0 %             |
| 58Ni (KED)  | 0.000 ppb             | 0.0 %             |
| 59Co (KED)  | 0.000 ppb             | 0.2 %             |
| 63Cu (KED)  | 0.000 ppb             | 0.1 %             |
| 64Zn (KED)  | 0.000 ppb             | 0.0 %             |
| 69Ga (KED)  | 0.000 ppb             | 0.2 %             |
| 75As (KED)  | 0.000 ppb             | 0.2 %             |
| 80Se (KED)  | 0.000 ppb             | 0.0 %             |
| 85Rb (KED)  | 0.000 ppb             | 0.2 %             |
| 88Sr (KED)  | 0.000 ppb             | 0.2 %             |
| 89Y (KED)   | 101.646 %             |                   |
| 107Ag (KED) | 0.000 ppb             | 0.1 %             |
| 114Cd (KED) | 0.000 ppb             | 0.2 %             |
| 115In (KED) | 102.081 %             |                   |
| 133Cs (KED) | 0.000 ppb             | 0.2 %             |
| 138Ba (KED) | 0.000 ppb             | 0.1 %             |
| 139La (KED) | 0.000 ppb             | 0.1 %             |
| 140Ce (KED) | 0.000 ppb             | 0.1 %             |
| 141Pr (KED) | 0.000 ppb             | 0.0 %             |
| 142Nd (KED) | 0.000 ppb             | 0.4 %             |
| 152Sm (KED) | 0.000 ppb             | 0.3 %             |
| 153Eu (KED) | 0.000 ppb             | 0.1 %             |
| 158Gd (KED) | 0.000 ppb             | 0.4 %             |
| 159Tb (KED) | 101.360 %             |                   |
| 164Dy (KED) | 0.000 ppb             | 0.5 %             |
| 166Er (KED) | 0.000 ppb             | 0.1 %             |
| 169Tm (KED) | 0.000 ppb             | 0.2 %             |
| 174Yb (KED) | 0.000 ppb             | 0.5 %             |
| 175Lu (KED) | 0.000 ppb             | 0.0 %             |
| 205Tl (KED) | 0.000 ppb             | 0.2 %             |
| 208Pb (KED) | 0.000 ppb             | 0.0 %             |
| 209Bi (KED) | 101.695 %             |                   |
| 232Th (KED) | 0.000 ppb             | 0.0 %             |
| 238U (KED)  | 0.000 ppb             | 0.1 %             |

| Category   | Concentration average | Intensity average | Intensity RSD |
|------------|-----------------------|-------------------|---------------|
| 6Li (KED)  | 96.027 %              | 4,406 cps         | 2.4 %         |
| 9Be (KED)  | 0.000 ppb             | 0 cps             |               |
| 11B (KED)  | 0.000 ppb             | 1,021 cps         | 4.7 %         |
| 24Mg (KED) | 0.000 ppb             | 180 cps           | 11.6 %        |
| 27Al (KED) | 0.000 ppb             | 61 cps            | 50.7 %        |

| Category    | Concentration average | Intensity average | Intensity RSD |
|-------------|-----------------------|-------------------|---------------|
| 45Sc (KED)  | 102.354 %             | 58,745 cps        | 2.5 %         |
| 51V (KED)   | 0.000 ppb             | 4 cps             | 114.6 %       |
| 52Cr (KED)  | 0.000 ppb             | 80 cps            | 34.1 %        |
| 55Mn (KED)  | 0.000 ppb             | 80 cps            | 18.2 %        |
| 56Fe (KED)  | 0.000 ppb             | 2,074 cps         | 0.7 %         |
| 58Ni (KED)  | 0.000 ppb             | 2,059 cps         | 1.8 %         |
| 59Co (KED)  | 0.000 ppb             | 39 cps            | 17.8 %        |
| 63Cu (KED)  | 0.000 ppb             | 670 cps           | 8.8 %         |
| 64Zn (KED)  | 0.000 ppb             | 2,690 cps         | 4.2 %         |
| 69Ga (KED)  | 0.000 ppb             | 43 cps            | 20.4 %        |
| 75As (KED)  | 0.000 ppb             | 17 cps            | 20.0 %        |
| 80Se (KED)  | 0.000 ppb             | 756 cps           | 1.8 %         |
| 85Rb (KED)  | 0.000 ppb             | 21 cps            | 24.1 %        |
| 88Sr (KED)  | 0.000 ppb             | 101 cps           | 18.2 %        |
| 89Y (KED)   | 101.646 %             | 580,957 cps       | 0.8 %         |
| 107Ag (KED) | 0.000 ppb             | 191 cps           | 7.3 %         |
| 114Cd (KED) | 0.000 ppb             | 67 cps            | 22.9 %        |
| 115In (KED) | 102.081 %             | 1,202,397 cps     | 1.3 %         |
| 133Cs (KED) | 0.000 ppb             | 28 cps            | 18.3 %        |
| 138Ba (KED) | 0.000 ppb             | 999 cps           | 7.4 %         |
| 139La (KED) | 0.000 ppb             | 91 cps            | 11.2 %        |
| 140Ce (KED) | 0.000 ppb             | 156 cps           | 9.7 %         |
| 141Pr (KED) | 0.000 ppb             | 86 cps            | 4.5 %         |
| 142Nd (KED) | 0.000 ppb             | 63 cps            | 42.1 %        |
| 152Sm (KED) | 0.000 ppb             | 24 cps            | 31.5 %        |
| 153Eu (KED) | 0.000 ppb             | 48 cps            | 8.1 %         |
| 158Gd (KED) | 0.000 ppb             | 38 cps            | 41.7 %        |
| 159Tb (KED) | 101.360 %             | 7,424,256 cps     | 0.9 %         |
| 164Dy (KED) | 0.000 ppb             | 50 cps            | 52.9 %        |
| 166Er (KED) | 0.000 ppb             | 672 cps           | 5.9 %         |
| 169Tm (KED) | 0.000 ppb             | 163 cps           | 17.4 %        |
| 174Yb (KED) | 0.000 ppb             | 94 cps            | 47.0 %        |
| 175Lu (KED) | 0.000 ppb             | 50,291 cps        | 1.9 %         |
| 205Tl (KED) | 0.000 ppb             | 119 cps           | 18.2 %        |
| 208Pb (KED) | 0.000 ppb             | 15,217 cps        | 1.9 %         |
| 209Bi (KED) | 101.695 %             | 7,379,927 cps     | 1.6 %         |
| 232Th (KED) | 0.000 ppb             | 352 cps           | 1.1 %         |
| 238U (KED)  | 0.000 ppb             | 262 cps           | 5.1 %         |

## Sample Summary

Instrument ID: iCAP Q

Analysis index: 4

Analysis name: 50+20

Analysis started at: 9/26/2021 2:43:35 PM

User name: WINDOWS-UPCI4ER\Administrator

| Category    | Concentration average | Concentration RSD |
|-------------|-----------------------|-------------------|
| 6Li (KED)   | 101.792 %             |                   |
| 9Be (KED)   | 50.051 ppb            | 2.6 %             |
| 11B (KED)   | 65.212 ppb            | 4.5 %             |
| 24Mg (KED)  | 50.191 ppb            | 1.0 %             |
| 27Al (KED)  | 50.774 ppb            | 4.4 %             |
| 45Sc (KED)  | 103.680 %             |                   |
| 51V (KED)   | 50.467 ppb            | 1.0 %             |
| 52Cr (KED)  | 50.074 ppb            | 1.2 %             |
| 55Mn (KED)  | 50.118 ppb            | 1.1 %             |
| 56Fe (KED)  | 50.369 ppb            | 1.6 %             |
| 58Ni (KED)  | 51.350 ppb            | 1.1 %             |
| 59Co (KED)  | 50.995 ppb            | 0.7 %             |
| 63Cu (KED)  | 52.648 ppb            | 1.4 %             |
| 64Zn (KED)  | 51.591 ppb            | 1.1 %             |
| 69Ga (KED)  | 51.556 ppb            | 1.3 %             |
| 75As (KED)  | 52.279 ppb            | 1.2 %             |
| 80Se (KED)  | 51.035 ppb            | 3.3 %             |
| 85Rb (KED)  | 51.032 ppb            | 0.8 %             |
| 88Sr (KED)  | 51.018 ppb            | 1.5 %             |
| 89Y (KED)   | 102.632 %             |                   |
| 107Ag (KED) | 51.340 ppb            | 0.5 %             |
| 114Cd (KED) | 51.253 ppb            | 1.3 %             |
| 115In (KED) | 102.386 %             |                   |
| 133Cs (KED) | 51.842 ppb            | 0.4 %             |
| 138Ba (KED) | 50.262 ppb            | 2.2 %             |
| 139La (KED) | 50.352 ppb            | 2.7 %             |
| 140Ce (KED) | 50.456 ppb            | 1.2 %             |
| 141Pr (KED) | 50.623 ppb            | 2.8 %             |
| 142Nd (KED) | 50.907 ppb            | 0.9 %             |
| 152Sm (KED) | 51.306 ppb            | 0.5 %             |
| 153Eu (KED) | 50.020 ppb            | 1.6 %             |
| 158Gd (KED) | 50.397 ppb            | 1.3 %             |
| 159Tb (KED) | 103.731 %             |                   |
| 164Dy (KED) | 49.857 ppb            | 2.5 %             |
| 166Er (KED) | 49.718 ppb            | 3.0 %             |
| 169Tm (KED) | 50.019 ppb            | 2.4 %             |
| 174Yb (KED) | 50.191 ppb            | 3.0 %             |
| 175Lu (KED) | 49.707 ppb            | 2.3 %             |
| 205Tl (KED) | 49.629 ppb            | 0.5 %             |
| 208Pb (KED) | 49.898 ppb            | 1.7 %             |
| 209Bi (KED) | 103.467 %             |                   |
| 232Th (KED) | 50.040 ppb            | 0.7 %             |
| 238U (KED)  | 50.817 ppb            | 2.0 %             |

| Category   | Concentration average | Intensity average | Intensity RSD |
|------------|-----------------------|-------------------|---------------|
| 6Li (KED)  | 101.792 %             | 4,671 cps         | 1.0 %         |
| 9Be (KED)  | 50.051 ppb            | 5,012 cps         | 2.3 %         |
| 11B (KED)  | 65.212 ppb            | 4,120 cps         | 2.4 %         |
| 24Mg (KED) | 50.191 ppb            | 17,467 cps        | 1.1 %         |
| 27Al (KED) | 50.774 ppb            | 4,312 cps         | 3.7 %         |

| Category    | Concentration average | Intensity average | Intensity RSD |
|-------------|-----------------------|-------------------|---------------|
| 45Sc (KED)  | 103.680 %             | 59,506 cps        | 0.6 %         |
| 51V (KED)   | 50.467 ppb            | 259,243 cps       | 0.4 %         |
| 52Cr (KED)  | 50.074 ppb            | 404,408 cps       | 0.6 %         |
| 55Mn (KED)  | 50.118 ppb            | 199,570 cps       | 0.8 %         |
| 56Fe (KED)  | 50.369 ppb            | 369,238 cps       | 1.0 %         |
| 58Ni (KED)  | 51.350 ppb            | 490,323 cps       | 1.5 %         |
| 59Co (KED)  | 50.995 ppb            | 813,121 cps       | 0.9 %         |
| 63Cu (KED)  | 52.648 ppb            | 620,607 cps       | 1.9 %         |
| 64Zn (KED)  | 51.591 ppb            | 157,985 cps       | 0.5 %         |
| 69Ga (KED)  | 51.556 ppb            | 197,785 cps       | 0.5 %         |
| 75As (KED)  | 52.279 ppb            | 46,436 cps        | 0.4 %         |
| 80Se (KED)  | 51.035 ppb            | 14,124 cps        | 2.3 %         |
| 85Rb (KED)  | 51.032 ppb            | 192,083 cps       | 0.5 %         |
| 88Sr (KED)  | 51.018 ppb            | 273,590 cps       | 0.7 %         |
| 89Y (KED)   | 102.632 %             | 586,597 cps       | 0.8 %         |
| 107Ag (KED) | 51.340 ppb            | 2,003,099 cps     | 0.5 %         |
| 114Cd (KED) | 51.253 ppb            | 739,097 cps       | 1.4 %         |
| 115In (KED) | 102.386 %             | 1,205,992 cps     | 0.1 %         |
| 133Cs (KED) | 51.842 ppb            | 1,122,818 cps     | 0.5 %         |
| 138Ba (KED) | 50.262 ppb            | 1,629,167 cps     | 0.6 %         |
| 139La (KED) | 50.352 ppb            | 3,470,623 cps     | 1.3 %         |
| 140Ce (KED) | 50.456 ppb            | 4,654,472 cps     | 0.5 %         |
| 141Pr (KED) | 50.623 ppb            | 4,923,894 cps     | 1.5 %         |
| 142Nd (KED) | 50.907 ppb            | 1,990,270 cps     | 0.8 %         |
| 152Sm (KED) | 51.306 ppb            | 1,902,207 cps     | 1.2 %         |
| 153Eu (KED) | 50.020 ppb            | 3,802,167 cps     | 1.2 %         |
| 158Gd (KED) | 50.397 ppb            | 2,701,038 cps     | 1.1 %         |
| 159Tb (KED) | 103.731 %             | 7,597,934 cps     | 1.6 %         |
| 164Dy (KED) | 49.857 ppb            | 3,018,657 cps     | 1.1 %         |
| 166Er (KED) | 49.718 ppb            | 3,664,895 cps     | 1.4 %         |
| 169Tm (KED) | 50.019 ppb            | 12,384,576 cps    | 0.8 %         |
| 174Yb (KED) | 50.191 ppb            | 4,561,399 cps     | 1.6 %         |
| 175Lu (KED) | 49.707 ppb            | 7,117,846 cps     | 1.1 %         |
| 205Tl (KED) | 49.629 ppb            | 9,451,011 cps     | 1.3 %         |
| 208Pb (KED) | 49.898 ppb            | 6,691,487 cps     | 0.3 %         |
| 209Bi (KED) | 103.467 %             | 7,508,506 cps     | 1.6 %         |
| 232Th (KED) | 50.040 ppb            | 14,071,382 cps    | 0.9 %         |
| 238U (KED)  | 50.817 ppb            | 16,798,871 cps    | 1.2 %         |

## Sample Summary

Instrument ID: iCAP Q

Analysis index: 5

Analysis name: 100+20

Analysis started at: 9/26/2021 2:46:59 PM

User name: WINDOWS-UPCI4ER\Administrator

| Category    | Concentration average | Concentration RSD |
|-------------|-----------------------|-------------------|
| 6Li (KED)   | 98.595 %              |                   |
| 9Be (KED)   | 99.974 ppb            | 1.1 %             |
| 11B (KED)   | 92.394 ppb            | 8.6 %             |
| 24Mg (KED)  | 99.904 ppb            | 2.6 %             |
| 27Al (KED)  | 99.613 ppb            | 2.7 %             |
| 45Sc (KED)  | 102.285 %             |                   |
| 51V (KED)   | 99.767 ppb            | 1.0 %             |
| 52Cr (KED)  | 99.963 ppb            | 1.4 %             |
| 55Mn (KED)  | 99.941 ppb            | 1.4 %             |
| 56Fe (KED)  | 99.815 ppb            | 1.3 %             |
| 58Ni (KED)  | 99.325 ppb            | 1.7 %             |
| 59Co (KED)  | 99.502 ppb            | 1.2 %             |
| 63Cu (KED)  | 98.676 ppb            | 0.6 %             |
| 64Zn (KED)  | 99.204 ppb            | 1.2 %             |
| 69Ga (KED)  | 99.222 ppb            | 0.8 %             |
| 75As (KED)  | 98.861 ppb            | 1.2 %             |
| 80Se (KED)  | 99.482 ppb            | 2.3 %             |
| 85Rb (KED)  | 99.484 ppb            | 3.0 %             |
| 88Sr (KED)  | 99.491 ppb            | 0.8 %             |
| 89Y (KED)   | 103.038 %             |                   |
| 107Ag (KED) | 99.330 ppb            | 2.0 %             |
| 114Cd (KED) | 99.374 ppb            | 1.8 %             |
| 115In (KED) | 102.343 %             |                   |
| 133Cs (KED) | 99.079 ppb            | 2.3 %             |
| 138Ba (KED) | 99.869 ppb            | 0.6 %             |
| 139La (KED) | 99.824 ppb            | 0.5 %             |
| 140Ce (KED) | 99.772 ppb            | 1.6 %             |
| 141Pr (KED) | 99.689 ppb            | 2.0 %             |
| 142Nd (KED) | 99.547 ppb            | 1.0 %             |
| 152Sm (KED) | 99.347 ppb            | 0.9 %             |
| 153Eu (KED) | 99.990 ppb            | 0.8 %             |
| 158Gd (KED) | 99.802 ppb            | 1.8 %             |
| 159Tb (KED) | 101.726 %             |                   |
| 164Dy (KED) | 100.071 ppb           | 0.8 %             |
| 166Er (KED) | 100.141 ppb           | 0.9 %             |
| 169Tm (KED) | 99.991 ppb            | 2.1 %             |
| 174Yb (KED) | 99.905 ppb            | 4.1 %             |
| 175Lu (KED) | 100.147 ppb           | 2.0 %             |
| 205Tl (KED) | 100.185 ppb           | 0.6 %             |
| 208Pb (KED) | 100.051 ppb           | 2.9 %             |
| 209Bi (KED) | 101.858 %             |                   |
| 232Th (KED) | 99.980 ppb            | 1.1 %             |
| 238U (KED)  | 99.592 ppb            | 0.4 %             |

| Category   | Concentration average | Intensity average | Intensity RSD |
|------------|-----------------------|-------------------|---------------|
| 6Li (KED)  | 98.595 %              | 4,524 cps         | 0.8 %         |
| 9Be (KED)  | 99.974 ppb            | 9,697 cps         | 0.3 %         |
| 11B (KED)  | 92.394 ppb            | 5,217 cps         | 6.4 %         |
| 24Mg (KED) | 99.904 ppb            | 33,488 cps        | 1.8 %         |
| 27Al (KED) | 99.613 ppb            | 8,288 cps         | 2.3 %         |

| Category    | Concentration average | Intensity average | Intensity RSD |
|-------------|-----------------------|-------------------|---------------|
| 45Sc (KED)  | 102.285 %             | 58,705 cps        | 0.4 %         |
| 51V (KED)   | 99.767 ppb            | 505,614 cps       | 1.2 %         |
| 52Cr (KED)  | 99.963 ppb            | 796,428 cps       | 1.4 %         |
| 55Mn (KED)  | 99.941 ppb            | 392,533 cps       | 1.2 %         |
| 56Fe (KED)  | 99.815 ppb            | 719,868 cps       | 1.1 %         |
| 58Ni (KED)  | 99.325 ppb            | 933,677 cps       | 1.4 %         |
| 59Co (KED)  | 99.502 ppb            | 1,565,150 cps     | 0.9 %         |
| 63Cu (KED)  | 98.676 ppb            | 1,167,119 cps     | 0.9 %         |
| 64Zn (KED)  | 99.204 ppb            | 302,469 cps       | 0.6 %         |
| 69Ga (KED)  | 99.222 ppb            | 382,125 cps       | 0.7 %         |
| 75As (KED)  | 98.861 ppb            | 88,145 cps        | 0.7 %         |
| 80Se (KED)  | 99.482 ppb            | 26,913 cps        | 1.4 %         |
| 85Rb (KED)  | 99.484 ppb            | 375,865 cps       | 2.2 %         |
| 88Sr (KED)  | 99.491 ppb            | 535,610 cps       | 1.6 %         |
| 89Y (KED)   | 103.038 %             | 588,913 cps       | 0.9 %         |
| 107Ag (KED) | 99.330 ppb            | 3,872,816 cps     | 0.5 %         |
| 114Cd (KED) | 99.374 ppb            | 1,432,105 cps     | 0.5 %         |
| 115In (KED) | 102.343 %             | 1,205,483 cps     | 1.6 %         |
| 133Cs (KED) | 99.079 ppb            | 2,144,480 cps     | 0.9 %         |
| 138Ba (KED) | 99.869 ppb            | 3,174,142 cps     | 0.9 %         |
| 139La (KED) | 99.824 ppb            | 6,749,162 cps     | 0.9 %         |
| 140Ce (KED) | 99.772 ppb            | 9,025,853 cps     | 1.0 %         |
| 141Pr (KED) | 99.689 ppb            | 9,509,831 cps     | 0.9 %         |
| 142Nd (KED) | 99.547 ppb            | 3,816,769 cps     | 1.2 %         |
| 152Sm (KED) | 99.347 ppb            | 3,612,411 cps     | 1.9 %         |
| 153Eu (KED) | 99.990 ppb            | 7,454,037 cps     | 0.6 %         |
| 158Gd (KED) | 99.802 ppb            | 5,245,145 cps     | 0.5 %         |
| 159Tb (KED) | 101.726 %             | 7,451,092 cps     | 1.4 %         |
| 164Dy (KED) | 100.071 ppb           | 5,942,994 cps     | 1.1 %         |
| 166Er (KED) | 100.141 ppb           | 7,240,237 cps     | 0.7 %         |
| 169Tm (KED) | 99.991 ppb            | 24,280,615 cps    | 0.7 %         |
| 174Yb (KED) | 99.905 ppb            | 8,903,834 cps     | 3.0 %         |
| 175Lu (KED) | 100.147 ppb           | 14,013,022 cps    | 0.6 %         |
| 205Tl (KED) | 100.185 ppb           | 18,782,440 cps    | 1.1 %         |
| 208Pb (KED) | 100.051 ppb           | 13,193,413 cps    | 2.2 %         |
| 209Bi (KED) | 101.858 %             | 7,391,740 cps     | 1.0 %         |
| 232Th (KED) | 99.980 ppb            | 27,678,133 cps    | 1.1 %         |
| 238U (KED)  | 99.592 ppb            | 32,415,133 cps    | 0.7 %         |

## Sample Summary

Instrument ID: iCAP Q

Analysis index: 6

Analysis name: 038633(00030)jian

Analysis started at: 9/26/2021 2:50:28 PM

User name: WINDOWS-UPCI4ER\Administrator

| Category    | Concentration average | Concentration RSD |
|-------------|-----------------------|-------------------|
| 6Li (KED)   | 97.457 %              | 5.6 %             |
| 9Be (KED)   | 0.139 ppb             | 66.7 %            |
| 11B (KED)   | -13.789 ppb           | 10.1 %            |
| 24Mg (KED)  | 1,239.342 ppb         | 4.4 %             |
| 27Al (KED)  | 1,620.733 ppb         | 0.7 %             |
| 45Sc (KED)  | 103.633 %             | 1.3 %             |
| 51V (KED)   | 3.267 ppb             | 1.5 %             |
| 52Cr (KED)  | 4.545 ppb             | 2.5 %             |
| 55Mn (KED)  | 43.862 ppb            | 0.6 %             |
| 56Fe (KED)  | 1,903.982 ppb         | 1.0 %             |
| 58Ni (KED)  | 9.962 ppb             | 1.1 %             |
| 59Co (KED)  | 0.812 ppb             | 2.0 %             |
| 63Cu (KED)  | 12.824 ppb            | 0.9 %             |
| 64Zn (KED)  | 149.326 ppb           | 2.1 %             |
| 69Ga (KED)  | 3.775 ppb             | 1.7 %             |
| 75As (KED)  | 1.129 ppb             | 1.9 %             |
| 80Se (KED)  | 0.241 ppb             | 85.2 %            |
| 85Rb (KED)  | 4.698 ppb             | 2.2 %             |
| 88Sr (KED)  | 15.305 ppb            | 1.5 %             |
| 89Y (KED)   | 103.892 %             | 1.7 %             |
| 107Ag (KED) | 0.072 ppb             | 15.2 %            |
| 114Cd (KED) | 0.123 ppb             | 8.9 %             |
| 115In (KED) | 98.636 %              | 1.1 %             |
| 133Cs (KED) | 0.393 ppb             | 1.3 %             |
| 138Ba (KED) | 14.591 ppb            | 0.3 %             |
| 139La (KED) | 1.407 ppb             | 0.9 %             |
| 140Ce (KED) | 2.924 ppb             | 1.3 %             |
| 141Pr (KED) | 0.443 ppb             | 37.7 %            |
| 142Nd (KED) | 1.920 ppb             | 10.4 %            |
| 152Sm (KED) | 0.379 ppb             | 52.5 %            |
| 153Eu (KED) | 0.153 ppb             | 111.0 %           |
| 158Gd (KED) | 0.302 ppb             | 42.9 %            |
| 159Tb (KED) | 106.574 %             | 0.3 %             |
| 164Dy (KED) | 0.225 ppb             | 45.4 %            |
| 166Er (KED) | 0.136 ppb             | 64.7 %            |
| 169Tm (KED) | 0.057 ppb             | 122.8 %           |
| 174Yb (KED) | 0.105 ppb             | 56.1 %            |
| 175Lu (KED) | -0.026 ppb            | 208.4 %           |
| 205Tl (KED) | 0.071 ppb             | 79.3 %            |
| 208Pb (KED) | 2.277 ppb             | 1.5 %             |
| 209Bi (KED) | 92.800 %              | 1.0 %             |
| 232Th (KED) | 0.642 ppb             | 7.7 %             |
| 238U (KED)  | 0.157 ppb             | 22.2 %            |

| Category   | Concentration average | Intensity average | Intensity RSD |
|------------|-----------------------|-------------------|---------------|
| 6Li (KED)  | 97.457 %              | 4,472 cps         | 5.6 %         |
| 9Be (KED)  | 0.139 ppb             | 13 cps            | 66.1 %        |
| 11B (KED)  | -13.789 ppb           | 419 cps           | 10.9 %        |
| 24Mg (KED) | 1,239.342 ppb         | 407,951 cps       | 1.7 %         |
| 27Al (KED) | 1,620.733 ppb         | 135,701 cps       | 1.3 %         |

| Category    | Concentration average | Intensity average | Intensity RSD |
|-------------|-----------------------|-------------------|---------------|
| 45Sc (KED)  | 103.633 %             | 59,479 cps        | 1.3 %         |
| 51V (KED)   | 3.267 ppb             | 16,776 cps        | 0.4 %         |
| 52Cr (KED)  | 4.545 ppb             | 36,767 cps        | 2.7 %         |
| 55Mn (KED)  | 43.862 ppb            | 174,587 cps       | 0.7 %         |
| 56Fe (KED)  | 1,903.982 ppb         | 13,875,661 cps    | 2.1 %         |
| 58Ni (KED)  | 9.962 ppb             | 96,758 cps        | 1.6 %         |
| 59Co (KED)  | 0.812 ppb             | 12,987 cps        | 3.0 %         |
| 63Cu (KED)  | 12.824 ppb            | 153,532 cps       | 1.7 %         |
| 64Zn (KED)  | 149.326 ppb           | 457,629 cps       | 1.6 %         |
| 69Ga (KED)  | 3.775 ppb             | 14,700 cps        | 2.2 %         |
| 75As (KED)  | 1.129 ppb             | 1,032 cps         | 3.3 %         |
| 80Se (KED)  | 0.241 ppb             | 837 cps           | 7.8 %         |
| 85Rb (KED)  | 4.698 ppb             | 17,923 cps        | 3.4 %         |
| 88Sr (KED)  | 15.305 ppb            | 83,157 cps        | 1.8 %         |
| 89Y (KED)   | 103.892 %             | 593,795 cps       | 1.7 %         |
| 107Ag (KED) | 0.072 ppb             | 2,898 cps         | 14.8 %        |
| 114Cd (KED) | 0.123 ppb             | 1,771 cps         | 8.2 %         |
| 115In (KED) | 98.636 %              | 1,161,818 cps     | 1.1 %         |
| 133Cs (KED) | 0.393 ppb             | 8,232 cps         | 1.9 %         |
| 138Ba (KED) | 14.591 ppb            | 486,758 cps       | 0.3 %         |
| 139La (KED) | 1.407 ppb             | 99,737 cps        | 0.8 %         |
| 140Ce (KED) | 2.924 ppb             | 277,280 cps       | 1.0 %         |
| 141Pr (KED) | 0.443 ppb             | 44,342 cps        | 37.3 %        |
| 142Nd (KED) | 1.920 ppb             | 77,163 cps        | 10.0 %        |
| 152Sm (KED) | 0.379 ppb             | 14,429 cps        | 52.0 %        |
| 153Eu (KED) | 0.153 ppb             | 11,937 cps        | 110.3 %       |
| 158Gd (KED) | 0.302 ppb             | 16,663 cps        | 42.5 %        |
| 159Tb (KED) | 106.574 %             | 7,806,197 cps     | 0.3 %         |
| 164Dy (KED) | 0.225 ppb             | 14,061 cps        | 44.9 %        |
| 166Er (KED) | 0.136 ppb             | 11,007 cps        | 60.2 %        |
| 169Tm (KED) | 0.057 ppb             | 14,671 cps        | 121.1 %       |
| 174Yb (KED) | 0.105 ppb             | 9,915 cps         | 55.2 %        |
| 175Lu (KED) | -0.026 ppb            | 49,062 cps        | 15.9 %        |
| 205Tl (KED) | 0.071 ppb             | 12,272 cps        | 79.1 %        |
| 208Pb (KED) | 2.277 ppb             | 287,119 cps       | 1.3 %         |
| 209Bi (KED) | 92.800 %              | 6,734,404 cps     | 1.0 %         |
| 232Th (KED) | 0.642 ppb             | 162,403 cps       | 8.1 %         |
| 238U (KED)  | 0.157 ppb             | 46,847 cps        | 22.6 %        |

## Sample Summary

Instrument ID: iCAP Q

Analysis index: 7

Analysis name: 163962(178573)jian

Analysis started at: 9/26/2021 2:53:59 PM

User name: WINDOWS-UPCI4ER\Administrator

| Category    | Concentration average | Concentration RSD |
|-------------|-----------------------|-------------------|
| 6Li (KED)   | 104.869 %             | 2.2 %             |
| 9Be (KED)   | 0.107 ppb             | 43.7 %            |
| 11B (KED)   | -11.713 ppb           | 8.7 %             |
| 24Mg (KED)  | 2,182.078 ppb         | 3.5 %             |
| 27Al (KED)  | 2,424.824 ppb         | 0.7 %             |
| 45Sc (KED)  | 114.132 %             | 2.1 %             |
| 51V (KED)   | 5.025 ppb             | 2.2 %             |
| 52Cr (KED)  | 5.292 ppb             | 1.9 %             |
| 55Mn (KED)  | 74.621 ppb            | 0.8 %             |
| 56Fe (KED)  | 3,229.698 ppb         | 1.2 %             |
| 58Ni (KED)  | 14.647 ppb            | 0.5 %             |
| 59Co (KED)  | 1.409 ppb             | 1.5 %             |
| 63Cu (KED)  | 12.028 ppb            | 1.1 %             |
| 64Zn (KED)  | 158.635 ppb           | 1.1 %             |
| 69Ga (KED)  | 5.544 ppb             | 3.4 %             |
| 75As (KED)  | 1.924 ppb             | 1.7 %             |
| 80Se (KED)  | 0.331 ppb             | 106.2 %           |
| 85Rb (KED)  | 5.786 ppb             | 1.2 %             |
| 88Sr (KED)  | 23.870 ppb            | 1.8 %             |
| 89Y (KED)   | 109.529 %             | 1.6 %             |
| 107Ag (KED) | 0.049 ppb             | 2.8 %             |
| 114Cd (KED) | 0.087 ppb             | 2.1 %             |
| 115In (KED) | 100.176 %             | 0.9 %             |
| 133Cs (KED) | 0.675 ppb             | 1.7 %             |
| 138Ba (KED) | 21.752 ppb            | 3.2 %             |
| 139La (KED) | 2.417 ppb             | 1.7 %             |
| 140Ce (KED) | 4.974 ppb             | 1.5 %             |
| 141Pr (KED) | 0.589 ppb             | 0.6 %             |
| 142Nd (KED) | 3.136 ppb             | 1.1 %             |
| 152Sm (KED) | 0.475 ppb             | 2.8 %             |
| 153Eu (KED) | 0.090 ppb             | 0.2 %             |
| 158Gd (KED) | 0.400 ppb             | 0.7 %             |
| 159Tb (KED) | 105.294 %             | 1.3 %             |
| 164Dy (KED) | 0.287 ppb             | 3.6 %             |
| 166Er (KED) | 0.144 ppb             | 1.8 %             |
| 169Tm (KED) | 0.017 ppb             | 4.3 %             |
| 174Yb (KED) | 0.109 ppb             | 3.8 %             |
| 175Lu (KED) | -0.060 ppb            | 10.0 %            |
| 205Tl (KED) | 0.045 ppb             | 1.8 %             |
| 208Pb (KED) | 3.540 ppb             | 2.5 %             |
| 209Bi (KED) | 89.500 %              | 0.9 %             |
| 232Th (KED) | 1.027 ppb             | 1.7 %             |
| 238U (KED)  | 0.238 ppb             | 1.5 %             |

| Category   | Concentration average | Intensity average | Intensity RSD |
|------------|-----------------------|-------------------|---------------|
| 6Li (KED)  | 104.869 %             | 4,812 cps         | 2.2 %         |
| 9Be (KED)  | 0.107 ppb             | 11 cps            | 45.8 %        |
| 11B (KED)  | -11.713 ppb           | 552 cps           | 8.0 %         |
| 24Mg (KED) | 2,182.078 ppb         | 773,592 cps       | 1.4 %         |
| 27Al (KED) | 2,424.824 ppb         | 223,563 cps       | 2.2 %         |

| Category    | Concentration average | Intensity average | Intensity RSD |
|-------------|-----------------------|-------------------|---------------|
| 45Sc (KED)  | 114.132 %             | 65,505 cps        | 2.1 %         |
| 51V (KED)   | 5.025 ppb             | 28,419 cps        | 2.2 %         |
| 52Cr (KED)  | 5.292 ppb             | 47,121 cps        | 0.5 %         |
| 55Mn (KED)  | 74.621 ppb            | 327,050 cps       | 1.9 %         |
| 56Fe (KED)  | 3,229.698 ppb         | 25,914,371 cps    | 1.1 %         |
| 58Ni (KED)  | 14.647 ppb            | 155,606 cps       | 2.3 %         |
| 59Co (KED)  | 1.409 ppb             | 24,776 cps        | 2.7 %         |
| 63Cu (KED)  | 12.028 ppb            | 151,853 cps       | 1.0 %         |
| 64Zn (KED)  | 158.635 ppb           | 512,393 cps       | 1.0 %         |
| 69Ga (KED)  | 5.544 ppb             | 22,733 cps        | 1.8 %         |
| 75As (KED)  | 1.924 ppb             | 1,841 cps         | 2.9 %         |
| 80Se (KED)  | 0.331 ppb             | 908 cps           | 12.3 %        |
| 85Rb (KED)  | 5.786 ppb             | 23,265 cps        | 2.1 %         |
| 88Sr (KED)  | 23.870 ppb            | 136,653 cps       | 0.2 %         |
| 89Y (KED)   | 109.529 %             | 626,018 cps       | 1.6 %         |
| 107Ag (KED) | 0.049 ppb             | 2,061 cps         | 2.1 %         |
| 114Cd (KED) | 0.087 ppb             | 1,287 cps         | 1.2 %         |
| 115In (KED) | 100.176 %             | 1,179,956 cps     | 0.9 %         |
| 133Cs (KED) | 0.675 ppb             | 14,335 cps        | 2.4 %         |
| 138Ba (KED) | 21.752 ppb            | 716,229 cps       | 1.9 %         |
| 139La (KED) | 2.417 ppb             | 169,226 cps       | 0.9 %         |
| 140Ce (KED) | 4.974 ppb             | 465,922 cps       | 0.6 %         |
| 141Pr (KED) | 0.589 ppb             | 58,241 cps        | 0.9 %         |
| 142Nd (KED) | 3.136 ppb             | 124,499 cps       | 0.9 %         |
| 152Sm (KED) | 0.475 ppb             | 17,920 cps        | 3.7 %         |
| 153Eu (KED) | 0.090 ppb             | 6,965 cps         | 1.5 %         |
| 158Gd (KED) | 0.400 ppb             | 21,815 cps        | 1.8 %         |
| 159Tb (KED) | 105.294 %             | 7,712,430 cps     | 1.3 %         |
| 164Dy (KED) | 0.287 ppb             | 17,681 cps        | 2.2 %         |
| 166Er (KED) | 0.144 ppb             | 11,486 cps        | 0.8 %         |
| 169Tm (KED) | 0.017 ppb             | 4,505 cps         | 4.9 %         |
| 174Yb (KED) | 0.109 ppb             | 10,159 cps        | 2.8 %         |
| 175Lu (KED) | -0.060 ppb            | 43,647 cps        | 1.6 %         |
| 205Tl (KED) | 0.045 ppb             | 7,561 cps         | 1.7 %         |
| 208Pb (KED) | 3.540 ppb             | 423,136 cps       | 1.5 %         |
| 209Bi (KED) | 89.500 %              | 6,494,986 cps     | 0.9 %         |
| 232Th (KED) | 1.027 ppb             | 250,032 cps       | 0.9 %         |
| 238U (KED)  | 0.238 ppb             | 68,169 cps        | 1.6 %         |

## Sample Summary

Instrument ID: iCAP Q

Analysis index: 8

Analysis name: 048711(179417)jian

Analysis started at: 9/26/2021 2:58:00 PM

User name: WINDOWS-UPCI4ER\Administrator

| Category    | Concentration average | Concentration RSD |
|-------------|-----------------------|-------------------|
| 6Li (KED)   | 112.887 %             | 5.8 %             |
| 9Be (KED)   | 0.072 ppb             | 69.7 %            |
| 11B (KED)   | -10.154 ppb           | 13.5 %            |
| 24Mg (KED)  | 1,207.780 ppb         | 6.3 %             |
| 27Al (KED)  | 1,641.269 ppb         | 2.5 %             |
| 45Sc (KED)  | 118.146 %             | 2.9 %             |
| 51V (KED)   | 3.208 ppb             | 1.4 %             |
| 52Cr (KED)  | 3.541 ppb             | 1.4 %             |
| 55Mn (KED)  | 42.031 ppb            | 2.1 %             |
| 56Fe (KED)  | 1,817.051 ppb         | 1.3 %             |
| 58Ni (KED)  | 8.264 ppb             | 2.9 %             |
| 59Co (KED)  | 0.807 ppb             | 5.4 %             |
| 63Cu (KED)  | 13.700 ppb            | 1.8 %             |
| 64Zn (KED)  | 146.721 ppb           | 1.5 %             |
| 69Ga (KED)  | 3.709 ppb             | 1.1 %             |
| 75As (KED)  | 1.133 ppb             | 9.0 %             |
| 80Se (KED)  | 0.184 ppb             | 47.6 %            |
| 85Rb (KED)  | 4.558 ppb             | 1.4 %             |
| 88Sr (KED)  | 14.701 ppb            | 1.8 %             |
| 89Y (KED)   | 111.769 %             | 2.1 %             |
| 107Ag (KED) | 0.039 ppb             | 1.6 %             |
| 114Cd (KED) | 0.065 ppb             | 11.5 %            |
| 115In (KED) | 100.413 %             | 1.9 %             |
| 133Cs (KED) | 0.404 ppb             | 1.3 %             |
| 138Ba (KED) | 13.998 ppb            | 3.7 %             |
| 139La (KED) | 1.351 ppb             | 3.4 %             |
| 140Ce (KED) | 2.808 ppb             | 3.9 %             |
| 141Pr (KED) | 0.339 ppb             | 8.9 %             |
| 142Nd (KED) | 1.777 ppb             | 4.9 %             |
| 152Sm (KED) | 0.265 ppb             | 8.2 %             |
| 153Eu (KED) | 0.059 ppb             | 25.1 %            |
| 158Gd (KED) | 0.224 ppb             | 7.3 %             |
| 159Tb (KED) | 103.120 %             | 1.8 %             |
| 164Dy (KED) | 0.160 ppb             | 6.4 %             |
| 166Er (KED) | 0.090 ppb             | 7.2 %             |
| 169Tm (KED) | 0.015 ppb             | 33.7 %            |
| 174Yb (KED) | 0.064 ppb             | 2.8 %             |
| 175Lu (KED) | -0.073 ppb            | 3.8 %             |
| 205Tl (KED) | 0.032 ppb             | 10.7 %            |
| 208Pb (KED) | 2.612 ppb             | 1.1 %             |
| 209Bi (KED) | 88.621 %              | 1.0 %             |
| 232Th (KED) | 0.512 ppb             | 0.9 %             |
| 238U (KED)  | 0.138 ppb             | 3.1 %             |

| Category   | Concentration average | Intensity average | Intensity RSD |
|------------|-----------------------|-------------------|---------------|
| 6Li (KED)  | 112.887 %             | 5,180 cps         | 5.8 %         |
| 9Be (KED)  | 0.072 ppb             | 8 cps             | 65.5 %        |
| 11B (KED)  | -10.154 ppb           | 673 cps           | 7.4 %         |
| 24Mg (KED) | 1,207.780 ppb         | 460,139 cps       | 0.6 %         |
| 27Al (KED) | 1,641.269 ppb         | 156,592 cps       | 1.0 %         |

| Category    | Concentration average | Intensity average | Intensity RSD |
|-------------|-----------------------|-------------------|---------------|
| 45Sc (KED)  | 118.146 %             | 67,808 cps        | 2.9 %         |
| 51V (KED)   | 3.208 ppb             | 18,782 cps        | 1.9 %         |
| 52Cr (KED)  | 3.541 ppb             | 32,667 cps        | 1.5 %         |
| 55Mn (KED)  | 42.031 ppb            | 190,694 cps       | 2.4 %         |
| 56Fe (KED)  | 1,817.051 ppb         | 15,091,819 cps    | 1.7 %         |
| 58Ni (KED)  | 8.264 ppb             | 91,869 cps        | 1.3 %         |
| 59Co (KED)  | 0.807 ppb             | 14,702 cps        | 3.5 %         |
| 63Cu (KED)  | 13.700 ppb            | 176,366 cps       | 0.9 %         |
| 64Zn (KED)  | 146.721 ppb           | 483,768 cps       | 0.8 %         |
| 69Ga (KED)  | 3.709 ppb             | 15,541 cps        | 2.7 %         |
| 75As (KED)  | 1.133 ppb             | 1,112 cps         | 6.9 %         |
| 80Se (KED)  | 0.184 ppb             | 883 cps           | 4.0 %         |
| 85Rb (KED)  | 4.558 ppb             | 18,701 cps        | 0.7 %         |
| 88Sr (KED)  | 14.701 ppb            | 85,919 cps        | 0.7 %         |
| 89Y (KED)   | 111.769 %             | 638,818 cps       | 2.1 %         |
| 107Ag (KED) | 0.039 ppb             | 1,689 cps         | 0.9 %         |
| 114Cd (KED) | 0.065 ppb             | 984 cps           | 9.0 %         |
| 115In (KED) | 100.413 %             | 1,182,753 cps     | 1.9 %         |
| 133Cs (KED) | 0.404 ppb             | 8,601 cps         | 1.2 %         |
| 138Ba (KED) | 13.998 ppb            | 451,683 cps       | 1.9 %         |
| 139La (KED) | 1.351 ppb             | 92,684 cps        | 2.0 %         |
| 140Ce (KED) | 2.808 ppb             | 257,607 cps       | 2.1 %         |
| 141Pr (KED) | 0.339 ppb             | 32,847 cps        | 7.5 %         |
| 142Nd (KED) | 1.777 ppb             | 69,087 cps        | 3.1 %         |
| 152Sm (KED) | 0.265 ppb             | 9,786 cps         | 6.7 %         |
| 153Eu (KED) | 0.059 ppb             | 4,479 cps         | 23.4 %        |
| 158Gd (KED) | 0.224 ppb             | 11,978 cps        | 5.7 %         |
| 159Tb (KED) | 103.120 %             | 7,553,207 cps     | 1.8 %         |
| 164Dy (KED) | 0.160 ppb             | 9,647 cps         | 4.8 %         |
| 166Er (KED) | 0.090 ppb             | 7,289 cps         | 4.8 %         |
| 169Tm (KED) | 0.015 ppb             | 3,750 cps         | 30.8 %        |
| 174Yb (KED) | 0.064 ppb             | 5,853 cps         | 2.5 %         |
| 175Lu (KED) | -0.073 ppb            | 40,835 cps        | 1.9 %         |
| 205Tl (KED) | 0.032 ppb             | 5,394 cps         | 10.9 %        |
| 208Pb (KED) | 2.612 ppb             | 312,612 cps       | 0.1 %         |
| 209Bi (KED) | 88.621 %              | 6,431,183 cps     | 1.0 %         |
| 232Th (KED) | 0.512 ppb             | 123,534 cps       | 1.4 %         |
| 238U (KED)  | 0.138 ppb             | 39,431 cps        | 3.0 %         |

## Sample Summary

Instrument ID: iCAP Q

Analysis index: 9

Analysis name: 016779(178595)jian

Analysis started at: 9/26/2021 3:01:42 PM

User name: WINDOWS-UPCI4ER\Administrator

| Category    | Concentration average | Concentration RSD |
|-------------|-----------------------|-------------------|
| 6Li (KED)   | 112.621 %             | 3.6 %             |
| 9Be (KED)   | 0.141 ppb             | 26.2 %            |
| 11B (KED)   | -10.373 ppb           | 10.2 %            |
| 24Mg (KED)  | 1,225.743 ppb         | 2.7 %             |
| 27Al (KED)  | 1,280.939 ppb         | 2.0 %             |
| 45Sc (KED)  | 122.864 %             | 0.5 %             |
| 51V (KED)   | 2.645 ppb             | 0.8 %             |
| 52Cr (KED)  | 3.542 ppb             | 18.9 %            |
| 55Mn (KED)  | 40.080 ppb            | 0.9 %             |
| 56Fe (KED)  | 1,759.136 ppb         | 1.4 %             |
| 58Ni (KED)  | 7.944 ppb             | 0.7 %             |
| 59Co (KED)  | 0.774 ppb             | 2.3 %             |
| 63Cu (KED)  | 10.602 ppb            | 1.3 %             |
| 64Zn (KED)  | 139.294 ppb           | 1.2 %             |
| 69Ga (KED)  | 3.433 ppb             | 1.9 %             |
| 75As (KED)  | 1.195 ppb             | 5.9 %             |
| 80Se (KED)  | 0.473 ppb             | 19.6 %            |
| 85Rb (KED)  | 4.094 ppb             | 0.7 %             |
| 88Sr (KED)  | 13.612 ppb            | 1.2 %             |
| 89Y (KED)   | 114.156 %             | 1.4 %             |
| 107Ag (KED) | 0.048 ppb             | 14.0 %            |
| 114Cd (KED) | 0.072 ppb             | 14.0 %            |
| 115In (KED) | 102.891 %             | 1.7 %             |
| 133Cs (KED) | 0.354 ppb             | 3.9 %             |
| 138Ba (KED) | 12.559 ppb            | 0.8 %             |
| 139La (KED) | 1.293 ppb             | 0.3 %             |
| 140Ce (KED) | 2.716 ppb             | 0.6 %             |
| 141Pr (KED) | 0.320 ppb             | 1.2 %             |
| 142Nd (KED) | 1.691 ppb             | 0.4 %             |
| 152Sm (KED) | 0.246 ppb             | 1.7 %             |
| 153Eu (KED) | 0.050 ppb             | 5.1 %             |
| 158Gd (KED) | 0.208 ppb             | 1.9 %             |
| 159Tb (KED) | 103.305 %             | 0.3 %             |
| 164Dy (KED) | 0.142 ppb             | 0.7 %             |
| 166Er (KED) | 0.068 ppb             | 5.3 %             |
| 169Tm (KED) | 0.010 ppb             | 5.3 %             |
| 174Yb (KED) | 0.056 ppb             | 5.3 %             |
| 175Lu (KED) | -0.078 ppb            | 11.7 %            |
| 205Tl (KED) | 0.026 ppb             | 3.8 %             |
| 208Pb (KED) | 2.156 ppb             | 0.7 %             |
| 209Bi (KED) | 88.187 %              | 0.5 %             |
| 232Th (KED) | 0.496 ppb             | 1.9 %             |
| 238U (KED)  | 0.119 ppb             | 1.9 %             |

| Category   | Concentration average | Intensity average | Intensity RSD |
|------------|-----------------------|-------------------|---------------|
| 6Li (KED)  | 112.621 %             | 5,168 cps         | 3.6 %         |
| 9Be (KED)  | 0.141 ppb             | 16 cps            | 24.7 %        |
| 11B (KED)  | -10.373 ppb           | 662 cps           | 8.2 %         |
| 24Mg (KED) | 1,225.743 ppb         | 466,790 cps       | 2.5 %         |
| 27Al (KED) | 1,280.939 ppb         | 127,176 cps       | 2.4 %         |

| Category    | Concentration average | Intensity average | Intensity RSD |
|-------------|-----------------------|-------------------|---------------|
| 45Sc (KED)  | 122.864 %             | 70,516 cps        | 0.5 %         |
| 51V (KED)   | 2.645 ppb             | 16,107 cps        | 1.3 %         |
| 52Cr (KED)  | 3.542 ppb             | 34,011 cps        | 19.4 %        |
| 55Mn (KED)  | 40.080 ppb            | 189,161 cps       | 1.4 %         |
| 56Fe (KED)  | 1,759.136 ppb         | 15,198,054 cps    | 1.3 %         |
| 58Ni (KED)  | 7.944 ppb             | 91,979 cps        | 1.2 %         |
| 59Co (KED)  | 0.774 ppb             | 14,676 cps        | 2.0 %         |
| 63Cu (KED)  | 10.602 ppb            | 139,597 cps       | 1.7 %         |
| 64Zn (KED)  | 139.294 ppb           | 469,326 cps       | 1.7 %         |
| 69Ga (KED)  | 3.433 ppb             | 14,699 cps        | 3.1 %         |
| 75As (KED)  | 1.195 ppb             | 1,199 cps         | 5.1 %         |
| 80Se (KED)  | 0.473 ppb             | 987 cps           | 4.0 %         |
| 85Rb (KED)  | 4.094 ppb             | 17,162 cps        | 0.8 %         |
| 88Sr (KED)  | 13.612 ppb            | 81,293 cps        | 2.5 %         |
| 89Y (KED)   | 114.156 %             | 652,459 cps       | 1.4 %         |
| 107Ag (KED) | 0.048 ppb             | 2,064 cps         | 14.1 %        |
| 114Cd (KED) | 0.072 ppb             | 1,106 cps         | 13.4 %        |
| 115In (KED) | 102.891 %             | 1,211,941 cps     | 1.7 %         |
| 133Cs (KED) | 0.354 ppb             | 7,730 cps         | 5.4 %         |
| 138Ba (KED) | 12.559 ppb            | 406,268 cps       | 1.0 %         |
| 139La (KED) | 1.293 ppb             | 88,877 cps        | 0.1 %         |
| 140Ce (KED) | 2.716 ppb             | 249,656 cps       | 0.8 %         |
| 141Pr (KED) | 0.320 ppb             | 31,112 cps        | 1.2 %         |
| 142Nd (KED) | 1.691 ppb             | 65,916 cps        | 0.2 %         |
| 152Sm (KED) | 0.246 ppb             | 9,114 cps         | 1.5 %         |
| 153Eu (KED) | 0.050 ppb             | 3,797 cps         | 5.0 %         |
| 158Gd (KED) | 0.208 ppb             | 11,134 cps        | 2.0 %         |
| 159Tb (KED) | 103.305 %             | 7,566,728 cps     | 0.3 %         |
| 164Dy (KED) | 0.142 ppb             | 8,590 cps         | 0.9 %         |
| 166Er (KED) | 0.068 ppb             | 5,664 cps         | 4.5 %         |
| 169Tm (KED) | 0.010 ppb             | 2,579 cps         | 5.2 %         |
| 174Yb (KED) | 0.056 ppb             | 5,162 cps         | 5.5 %         |
| 175Lu (KED) | -0.078 ppb            | 40,204 cps        | 3.4 %         |
| 205Tl (KED) | 0.026 ppb             | 4,395 cps         | 3.2 %         |
| 208Pb (KED) | 2.156 ppb             | 259,114 cps       | 0.3 %         |
| 209Bi (KED) | 88.187 %              | 6,399,700 cps     | 0.5 %         |
| 232Th (KED) | 0.496 ppb             | 119,142 cps       | 2.2 %         |
| 238U (KED)  | 0.119 ppb             | 33,720 cps        | 1.4 %         |

## Sample Summary

Instrument ID: iCAP Q

Analysis index: 10

Analysis name: 038918(27797)jian

Analysis started at: 9/26/2021 3:05:08 PM

User name: WINDOWS-UPCI4ER\Administrator

| Category    | Concentration average | Concentration RSD |
|-------------|-----------------------|-------------------|
| 6Li (KED)   | 112.354 %             | 0.8 %             |
| 9Be (KED)   | 0.040 ppb             | 42.4 %            |
| 11B (KED)   | -15.118 ppb           | 5.6 %             |
| 24Mg (KED)  | 620.275 ppb           | 1.2 %             |
| 27Al (KED)  | 840.579 ppb           | 1.3 %             |
| 45Sc (KED)  | 121.509 %             | 1.0 %             |
| 51V (KED)   | 1.459 ppb             | 0.4 %             |
| 52Cr (KED)  | 1.954 ppb             | 2.1 %             |
| 55Mn (KED)  | 21.672 ppb            | 2.3 %             |
| 56Fe (KED)  | 830.730 ppb           | 0.9 %             |
| 58Ni (KED)  | 3.879 ppb             | 1.8 %             |
| 59Co (KED)  | 0.379 ppb             | 2.2 %             |
| 63Cu (KED)  | 13.337 ppb            | 3.1 %             |
| 64Zn (KED)  | 150.537 ppb           | 2.8 %             |
| 69Ga (KED)  | 2.058 ppb             | 1.6 %             |
| 75As (KED)  | 0.767 ppb             | 2.1 %             |
| 80Se (KED)  | 0.309 ppb             | 58.0 %            |
| 85Rb (KED)  | 2.321 ppb             | 0.9 %             |
| 88Sr (KED)  | 7.578 ppb             | 1.5 %             |
| 89Y (KED)   | 110.279 %             | 2.4 %             |
| 107Ag (KED) | 0.028 ppb             | 4.3 %             |
| 114Cd (KED) | 0.052 ppb             | 7.0 %             |
| 115In (KED) | 102.405 %             | 0.7 %             |
| 133Cs (KED) | 0.192 ppb             | 1.5 %             |
| 138Ba (KED) | 7.440 ppb             | 0.5 %             |
| 139La (KED) | 0.528 ppb             | 2.0 %             |
| 140Ce (KED) | 1.112 ppb             | 1.5 %             |
| 141Pr (KED) | 0.126 ppb             | 1.9 %             |
| 142Nd (KED) | 0.697 ppb             | 2.8 %             |
| 152Sm (KED) | 0.100 ppb             | 1.2 %             |
| 153Eu (KED) | 0.020 ppb             | 9.2 %             |
| 158Gd (KED) | 0.090 ppb             | 1.6 %             |
| 159Tb (KED) | 104.424 %             | 1.1 %             |
| 164Dy (KED) | 0.067 ppb             | 6.3 %             |
| 166Er (KED) | 0.030 ppb             | 4.0 %             |
| 169Tm (KED) | 0.004 ppb             | 5.6 %             |
| 174Yb (KED) | 0.026 ppb             | 5.6 %             |
| 175Lu (KED) | -0.104 ppb            | 12.8 %            |
| 205Tl (KED) | 0.017 ppb             | 3.9 %             |
| 208Pb (KED) | 1.701 ppb             | 1.9 %             |
| 209Bi (KED) | 88.766 %              | 1.4 %             |
| 232Th (KED) | 0.237 ppb             | 2.0 %             |
| 238U (KED)  | 0.072 ppb             | 3.7 %             |

| Category   | Concentration average | Intensity average | Intensity RSD |
|------------|-----------------------|-------------------|---------------|
| 6Li (KED)  | 112.354 %             | 5,156 cps         | 0.8 %         |
| 9Be (KED)  | 0.040 ppb             | 4 cps             | 43.3 %        |
| 11B (KED)  | -15.118 ppb           | 417 cps           | 9.7 %         |
| 24Mg (KED) | 620.275 ppb           | 235,850 cps       | 0.4 %         |
| 27Al (KED) | 840.579 ppb           | 82,553 cps        | 1.4 %         |

| Category    | Concentration average | Intensity average | Intensity RSD |
|-------------|-----------------------|-------------------|---------------|
| 45Sc (KED)  | 121.509 %             | 69,739 cps        | 1.0 %         |
| 51V (KED)   | 1.459 ppb             | 8,792 cps         | 1.4 %         |
| 52Cr (KED)  | 1.954 ppb             | 18,585 cps        | 2.8 %         |
| 55Mn (KED)  | 21.672 ppb            | 101,178 cps       | 1.4 %         |
| 56Fe (KED)  | 830.730 ppb           | 7,098,899 cps     | 0.4 %         |
| 58Ni (KED)  | 3.879 ppb             | 45,668 cps        | 0.9 %         |
| 59Co (KED)  | 0.379 ppb             | 7,135 cps         | 3.2 %         |
| 63Cu (KED)  | 13.337 ppb            | 169,397 cps       | 1.5 %         |
| 64Zn (KED)  | 150.537 ppb           | 489,541 cps       | 0.3 %         |
| 69Ga (KED)  | 2.058 ppb             | 8,526 cps         | 1.1 %         |
| 75As (KED)  | 0.767 ppb             | 750 cps           | 0.4 %         |
| 80Se (KED)  | 0.309 ppb             | 907 cps           | 6.1 %         |
| 85Rb (KED)  | 2.321 ppb             | 9,408 cps         | 2.7 %         |
| 88Sr (KED)  | 7.578 ppb             | 43,762 cps        | 2.9 %         |
| 89Y (KED)   | 110.279 %             | 630,299 cps       | 2.4 %         |
| 107Ag (KED) | 0.028 ppb             | 1,302 cps         | 3.0 %         |
| 114Cd (KED) | 0.052 ppb             | 811 cps           | 6.2 %         |
| 115In (KED) | 102.405 %             | 1,206,212 cps     | 0.7 %         |
| 133Cs (KED) | 0.192 ppb             | 4,193 cps         | 2.2 %         |
| 138Ba (KED) | 7.440 ppb             | 243,703 cps       | 0.9 %         |
| 139La (KED) | 0.528 ppb             | 36,714 cps        | 1.0 %         |
| 140Ce (KED) | 1.112 ppb             | 103,418 cps       | 0.5 %         |
| 141Pr (KED) | 0.126 ppb             | 12,466 cps        | 2.7 %         |
| 142Nd (KED) | 0.697 ppb             | 27,482 cps        | 1.8 %         |
| 152Sm (KED) | 0.100 ppb             | 3,766 cps         | 1.7 %         |
| 153Eu (KED) | 0.020 ppb             | 1,548 cps         | 7.9 %         |
| 158Gd (KED) | 0.090 ppb             | 4,885 cps         | 1.4 %         |
| 159Tb (KED) | 104.424 %             | 7,648,729 cps     | 1.1 %         |
| 164Dy (KED) | 0.067 ppb             | 4,107 cps         | 7.0 %         |
| 166Er (KED) | 0.030 ppb             | 2,897 cps         | 3.4 %         |
| 169Tm (KED) | 0.004 ppb             | 1,176 cps         | 4.9 %         |
| 174Yb (KED) | 0.026 ppb             | 2,442 cps         | 6.0 %         |
| 175Lu (KED) | -0.104 ppb            | 36,926 cps        | 4.5 %         |
| 205Tl (KED) | 0.017 ppb             | 2,873 cps         | 3.7 %         |
| 208Pb (KED) | 1.701 ppb             | 208,570 cps       | 0.4 %         |
| 209Bi (KED) | 88.766 %              | 6,441,665 cps     | 1.4 %         |
| 232Th (KED) | 0.237 ppb             | 57,532 cps        | 1.9 %         |
| 238U (KED)  | 0.072 ppb             | 20,743 cps        | 3.3 %         |

## Sample Summary

Instrument ID: iCAP Q

Analysis index: 11

Analysis name: 179398jian

Analysis started at: 9/26/2021 3:08:28 PM

User name: WINDOWS-UPCI4ER\Administrator

| Category    | Concentration average | Concentration RSD |
|-------------|-----------------------|-------------------|
| 6Li (KED)   | 114.026 %             | 1.3 %             |
| 9Be (KED)   | 0.030 ppb             | 99.1 %            |
| 11B (KED)   | -12.069 ppb           | 1.7 %             |
| 24Mg (KED)  | 686.613 ppb           | 1.9 %             |
| 27Al (KED)  | 756.764 ppb           | 0.9 %             |
| 45Sc (KED)  | 121.141 %             | 1.7 %             |
| 51V (KED)   | 1.445 ppb             | 4.2 %             |
| 52Cr (KED)  | 2.138 ppb             | 2.8 %             |
| 55Mn (KED)  | 22.045 ppb            | 2.1 %             |
| 56Fe (KED)  | 869.915 ppb           | 2.0 %             |
| 58Ni (KED)  | 3.843 ppb             | 2.8 %             |
| 59Co (KED)  | 0.431 ppb             | 1.8 %             |
| 63Cu (KED)  | 12.079 ppb            | 1.2 %             |
| 64Zn (KED)  | 158.325 ppb           | 0.5 %             |
| 69Ga (KED)  | 1.868 ppb             | 2.5 %             |
| 75As (KED)  | 0.848 ppb             | 3.7 %             |
| 80Se (KED)  | 0.253 ppb             | 62.3 %            |
| 85Rb (KED)  | 2.218 ppb             | 1.2 %             |
| 88Sr (KED)  | 9.780 ppb             | 1.4 %             |
| 89Y (KED)   | 114.423 %             | 0.6 %             |
| 107Ag (KED) | 0.039 ppb             | 2.5 %             |
| 114Cd (KED) | 0.035 ppb             | 10.1 %            |
| 115In (KED) | 102.954 %             | 0.9 %             |
| 133Cs (KED) | 0.192 ppb             | 0.4 %             |
| 138Ba (KED) | 6.971 ppb             | 0.4 %             |
| 139La (KED) | 0.585 ppb             | 1.2 %             |
| 140Ce (KED) | 1.237 ppb             | 1.0 %             |
| 141Pr (KED) | 0.142 ppb             | 2.1 %             |
| 142Nd (KED) | 0.779 ppb             | 0.8 %             |
| 152Sm (KED) | 0.113 ppb             | 6.8 %             |
| 153Eu (KED) | 0.022 ppb             | 1.0 %             |
| 158Gd (KED) | 0.097 ppb             | 1.8 %             |
| 159Tb (KED) | 106.260 %             | 0.7 %             |
| 164Dy (KED) | 0.071 ppb             | 3.4 %             |
| 166Er (KED) | 0.033 ppb             | 1.3 %             |
| 169Tm (KED) | 0.004 ppb             | 6.1 %             |
| 174Yb (KED) | 0.027 ppb             | 4.7 %             |
| 175Lu (KED) | -0.104 ppb            | 4.2 %             |
| 205Tl (KED) | 0.017 ppb             | 4.8 %             |
| 208Pb (KED) | 1.466 ppb             | 1.9 %             |
| 209Bi (KED) | 91.272 %              | 0.6 %             |
| 232Th (KED) | 0.265 ppb             | 1.7 %             |
| 238U (KED)  | 0.086 ppb             | 2.7 %             |

| Category   | Concentration average | Intensity average | Intensity RSD |
|------------|-----------------------|-------------------|---------------|
| 6Li (KED)  | 114.026 %             | 5,232 cps         | 1.3 %         |
| 9Be (KED)  | 0.030 ppb             | 3 cps             | 100.0 %       |
| 11B (KED)  | -12.069 ppb           | 582 cps           | 2.0 %         |
| 24Mg (KED) | 686.613 ppb           | 264,908 cps       | 0.6 %         |
| 27Al (KED) | 756.764 ppb           | 74,098 cps        | 0.8 %         |

| Category    | Concentration average | Intensity average | Intensity RSD |
|-------------|-----------------------|-------------------|---------------|
| 45Sc (KED)  | 121.141 %             | 69,528 cps        | 1.7 %         |
| 51V (KED)   | 1.445 ppb             | 8,675 cps         | 3.6 %         |
| 52Cr (KED)  | 2.138 ppb             | 20,263 cps        | 1.6 %         |
| 55Mn (KED)  | 22.045 ppb            | 102,604 cps       | 1.1 %         |
| 56Fe (KED)  | 869.915 ppb           | 7,409,995 cps     | 0.7 %         |
| 58Ni (KED)  | 3.843 ppb             | 45,115 cps        | 1.0 %         |
| 59Co (KED)  | 0.431 ppb             | 8,072 cps         | 0.1 %         |
| 63Cu (KED)  | 12.079 ppb            | 159,314 cps       | 1.0 %         |
| 64Zn (KED)  | 158.325 ppb           | 534,288 cps       | 0.7 %         |
| 69Ga (KED)  | 1.868 ppb             | 8,036 cps         | 2.2 %         |
| 75As (KED)  | 0.848 ppb             | 858 cps           | 3.4 %         |
| 80Se (KED)  | 0.253 ppb             | 924 cps           | 4.6 %         |
| 85Rb (KED)  | 2.218 ppb             | 9,332 cps         | 1.1 %         |
| 88Sr (KED)  | 9.780 ppb             | 58,569 cps        | 2.0 %         |
| 89Y (KED)   | 114.423 %             | 653,988 cps       | 0.6 %         |
| 107Ag (KED) | 0.039 ppb             | 1,730 cps         | 1.3 %         |
| 114Cd (KED) | 0.035 ppb             | 573 cps           | 8.1 %         |
| 115In (KED) | 102.954 %             | 1,212,674 cps     | 0.9 %         |
| 133Cs (KED) | 0.192 ppb             | 4,217 cps         | 1.1 %         |
| 138Ba (KED) | 6.971 ppb             | 232,430 cps       | 1.0 %         |
| 139La (KED) | 0.585 ppb             | 41,400 cps        | 0.5 %         |
| 140Ce (KED) | 1.237 ppb             | 117,103 cps       | 0.9 %         |
| 141Pr (KED) | 0.142 ppb             | 14,210 cps        | 1.5 %         |
| 142Nd (KED) | 0.779 ppb             | 31,269 cps        | 1.2 %         |
| 152Sm (KED) | 0.113 ppb             | 4,312 cps         | 6.4 %         |
| 153Eu (KED) | 0.022 ppb             | 1,750 cps         | 1.6 %         |
| 158Gd (KED) | 0.097 ppb             | 5,376 cps         | 1.4 %         |
| 159Tb (KED) | 106.260 %             | 7,783,208 cps     | 0.7 %         |
| 164Dy (KED) | 0.071 ppb             | 4,481 cps         | 2.9 %         |
| 166Er (KED) | 0.033 ppb             | 3,219 cps         | 0.4 %         |
| 169Tm (KED) | 0.004 ppb             | 1,201 cps         | 4.5 %         |
| 174Yb (KED) | 0.027 ppb             | 2,654 cps         | 5.2 %         |
| 175Lu (KED) | -0.104 ppb            | 37,613 cps        | 1.6 %         |
| 205Tl (KED) | 0.017 ppb             | 2,955 cps         | 4.0 %         |
| 208Pb (KED) | 1.466 ppb             | 186,745 cps       | 1.2 %         |
| 209Bi (KED) | 91.272 %              | 6,623,565 cps     | 0.6 %         |
| 232Th (KED) | 0.265 ppb             | 65,985 cps        | 1.5 %         |
| 238U (KED)  | 0.086 ppb             | 25,424 cps        | 2.9 %         |

## Sample Summary

Instrument ID: iCAP Q

Analysis index: 12

Analysis name: 038928(178605)jian

Analysis started at: 9/26/2021 3:11:58 PM

User name: WINDOWS-UPCI4ER\Administrator

| Category    | Concentration average | Concentration RSD |
|-------------|-----------------------|-------------------|
| 6Li (KED)   | 117.030 %             | 1.5 %             |
| 9Be (KED)   | 0.048 ppb             | 92.1 %            |
| 11B (KED)   | -12.810 ppb           | 2.7 %             |
| 24Mg (KED)  | 1,217.859 ppb         | 2.7 %             |
| 27Al (KED)  | 1,380.533 ppb         | 2.2 %             |
| 45Sc (KED)  | 126.427 %             | 0.2 %             |
| 51V (KED)   | 2.643 ppb             | 1.1 %             |
| 52Cr (KED)  | 2.623 ppb             | 2.6 %             |
| 55Mn (KED)  | 39.654 ppb            | 1.9 %             |
| 56Fe (KED)  | 1,461.931 ppb         | 2.0 %             |
| 58Ni (KED)  | 6.339 ppb             | 3.1 %             |
| 59Co (KED)  | 0.706 ppb             | 0.8 %             |
| 63Cu (KED)  | 11.791 ppb            | 1.4 %             |
| 64Zn (KED)  | 144.298 ppb           | 0.3 %             |
| 69Ga (KED)  | 3.373 ppb             | 2.1 %             |
| 75As (KED)  | 1.083 ppb             | 5.0 %             |
| 80Se (KED)  | 0.156 ppb             | 63.2 %            |
| 85Rb (KED)  | 3.856 ppb             | 1.8 %             |
| 88Sr (KED)  | 17.233 ppb            | 1.4 %             |
| 89Y (KED)   | 114.530 %             | 1.6 %             |
| 107Ag (KED) | 0.058 ppb             | 5.7 %             |
| 114Cd (KED) | 0.060 ppb             | 7.6 %             |
| 115In (KED) | 102.833 %             | 1.2 %             |
| 133Cs (KED) | 0.348 ppb             | 2.3 %             |
| 138Ba (KED) | 12.237 ppb            | 1.6 %             |
| 139La (KED) | 1.069 ppb             | 1.3 %             |
| 140Ce (KED) | 2.255 ppb             | 1.4 %             |
| 141Pr (KED) | 0.259 ppb             | 1.7 %             |
| 142Nd (KED) | 1.409 ppb             | 2.6 %             |
| 152Sm (KED) | 0.206 ppb             | 2.6 %             |
| 153Eu (KED) | 0.037 ppb             | 3.1 %             |
| 158Gd (KED) | 0.176 ppb             | 4.7 %             |
| 159Tb (KED) | 106.033 %             | 0.7 %             |
| 164Dy (KED) | 0.124 ppb             | 2.6 %             |
| 166Er (KED) | 0.058 ppb             | 1.5 %             |
| 169Tm (KED) | 0.008 ppb             | 1.1 %             |
| 174Yb (KED) | 0.047 ppb             | 4.2 %             |
| 175Lu (KED) | -0.104 ppb            | 7.5 %             |
| 205Tl (KED) | 0.028 ppb             | 1.6 %             |
| 208Pb (KED) | 2.432 ppb             | 1.0 %             |
| 209Bi (KED) | 86.775 %              | 0.4 %             |
| 232Th (KED) | 0.442 ppb             | 0.5 %             |
| 238U (KED)  | 0.138 ppb             | 1.4 %             |

| Category   | Concentration average | Intensity average | Intensity RSD |
|------------|-----------------------|-------------------|---------------|
| 6Li (KED)  | 117.030 %             | 5,370 cps         | 1.5 %         |
| 9Be (KED)  | 0.048 ppb             | 6 cps             | 91.7 %        |
| 11B (KED)  | -12.810 ppb           | 558 cps           | 2.8 %         |
| 24Mg (KED) | 1,217.859 ppb         | 482,034 cps       | 1.2 %         |
| 27Al (KED) | 1,380.533 ppb         | 141,027 cps       | 2.2 %         |

| Category    | Concentration average | Intensity average | Intensity RSD |
|-------------|-----------------------|-------------------|---------------|
| 45Sc (KED)  | 126.427 %             | 72,561 cps        | 0.2 %         |
| 51V (KED)   | 2.643 ppb             | 16,561 cps        | 1.3 %         |
| 52Cr (KED)  | 2.623 ppb             | 25,921 cps        | 2.5 %         |
| 55Mn (KED)  | 39.654 ppb            | 192,572 cps       | 2.0 %         |
| 56Fe (KED)  | 1,461.931 ppb         | 12,997,195 cps    | 2.0 %         |
| 58Ni (KED)  | 6.339 ppb             | 76,037 cps        | 3.0 %         |
| 59Co (KED)  | 0.706 ppb             | 13,777 cps        | 0.9 %         |
| 63Cu (KED)  | 11.791 ppb            | 155,705 cps       | 2.9 %         |
| 64Zn (KED)  | 144.298 ppb           | 487,690 cps       | 1.8 %         |
| 69Ga (KED)  | 3.373 ppb             | 14,488 cps        | 3.7 %         |
| 75As (KED)  | 1.083 ppb             | 1,091 cps         | 3.7 %         |
| 80Se (KED)  | 0.156 ppb             | 897 cps           | 2.4 %         |
| 85Rb (KED)  | 3.856 ppb             | 16,217 cps        | 1.1 %         |
| 88Sr (KED)  | 17.233 ppb            | 103,199 cps       | 0.9 %         |
| 89Y (KED)   | 114.530 %             | 654,600 cps       | 1.6 %         |
| 107Ag (KED) | 0.058 ppb             | 2,470 cps         | 5.5 %         |
| 114Cd (KED) | 0.060 ppb             | 943 cps           | 8.2 %         |
| 115In (KED) | 102.833 %             | 1,211,253 cps     | 1.2 %         |
| 133Cs (KED) | 0.348 ppb             | 7,592 cps         | 2.3 %         |
| 138Ba (KED) | 12.237 ppb            | 406,302 cps       | 1.0 %         |
| 139La (KED) | 1.069 ppb             | 75,433 cps        | 0.8 %         |
| 140Ce (KED) | 2.255 ppb             | 212,850 cps       | 1.0 %         |
| 141Pr (KED) | 0.259 ppb             | 25,821 cps        | 2.3 %         |
| 142Nd (KED) | 1.409 ppb             | 56,368 cps        | 2.0 %         |
| 152Sm (KED) | 0.206 ppb             | 7,822 cps         | 2.3 %         |
| 153Eu (KED) | 0.037 ppb             | 2,926 cps         | 3.4 %         |
| 158Gd (KED) | 0.176 ppb             | 9,663 cps         | 5.3 %         |
| 159Tb (KED) | 106.033 %             | 7,766,531 cps     | 0.7 %         |
| 164Dy (KED) | 0.124 ppb             | 7,718 cps         | 2.0 %         |
| 166Er (KED) | 0.058 ppb             | 5,055 cps         | 0.6 %         |
| 169Tm (KED) | 0.008 ppb             | 2,076 cps         | 1.7 %         |
| 174Yb (KED) | 0.047 ppb             | 4,459 cps         | 3.5 %         |
| 175Lu (KED) | -0.104 ppb            | 37,570 cps        | 2.8 %         |
| 205Tl (KED) | 0.028 ppb             | 4,561 cps         | 1.3 %         |
| 208Pb (KED) | 2.432 ppb             | 285,917 cps       | 1.3 %         |
| 209Bi (KED) | 86.775 %              | 6,297,174 cps     | 0.4 %         |
| 232Th (KED) | 0.442 ppb             | 104,522 cps       | 0.6 %         |
| 238U (KED)  | 0.138 ppb             | 38,427 cps        | 1.7 %         |

## Sample Summary

Instrument ID: iCAP Q

Analysis index: 13

Analysis name: 083632(00019)jian

Analysis started at: 9/26/2021 3:15:24 PM

User name: WINDOWS-UPCI4ER\Administrator

| Category    | Concentration average | Concentration RSD |
|-------------|-----------------------|-------------------|
| 6Li (KED)   | 121.317 %             | 1.6 %             |
| 9Be (KED)   | 0.047 ppb             | 70.8 %            |
| 11B (KED)   | -13.083 ppb           | 4.7 %             |
| 24Mg (KED)  | 1,528.734 ppb         | 2.7 %             |
| 27Al (KED)  | 1,556.275 ppb         | 1.2 %             |
| 45Sc (KED)  | 130.920 %             | 1.8 %             |
| 51V (KED)   | 3.285 ppb             | 1.4 %             |
| 52Cr (KED)  | 4.283 ppb             | 1.3 %             |
| 55Mn (KED)  | 50.144 ppb            | 0.5 %             |
| 56Fe (KED)  | 2,124.612 ppb         | 0.3 %             |
| 58Ni (KED)  | 9.446 ppb             | 1.3 %             |
| 59Co (KED)  | 0.961 ppb             | 7.2 %             |
| 63Cu (KED)  | 14.153 ppb            | 0.8 %             |
| 64Zn (KED)  | 155.501 ppb           | 1.3 %             |
| 69Ga (KED)  | 4.283 ppb             | 1.2 %             |
| 75As (KED)  | 1.468 ppb             | 3.8 %             |
| 80Se (KED)  | 0.512 ppb             | 27.6 %            |
| 85Rb (KED)  | 4.746 ppb             | 2.5 %             |
| 88Sr (KED)  | 17.461 ppb            | 1.4 %             |
| 89Y (KED)   | 117.417 %             | 2.5 %             |
| 107Ag (KED) | 0.057 ppb             | 4.1 %             |
| 114Cd (KED) | 0.045 ppb             | 7.8 %             |
| 115In (KED) | 104.486 %             | 0.3 %             |
| 133Cs (KED) | 0.427 ppb             | 1.8 %             |
| 138Ba (KED) | 16.081 ppb            | 1.3 %             |
| 139La (KED) | 1.590 ppb             | 2.9 %             |
| 140Ce (KED) | 3.221 ppb             | 0.9 %             |
| 141Pr (KED) | 0.383 ppb             | 3.2 %             |
| 142Nd (KED) | 2.023 ppb             | 1.5 %             |
| 152Sm (KED) | 0.300 ppb             | 2.1 %             |
| 153Eu (KED) | 0.057 ppb             | 1.0 %             |
| 158Gd (KED) | 0.253 ppb             | 4.0 %             |
| 159Tb (KED) | 103.771 %             | 1.9 %             |
| 164Dy (KED) | 0.176 ppb             | 0.3 %             |
| 166Er (KED) | 0.086 ppb             | 4.5 %             |
| 169Tm (KED) | 0.011 ppb             | 4.2 %             |
| 174Yb (KED) | 0.069 ppb             | 3.3 %             |
| 175Lu (KED) | -0.087 ppb            | 11.9 %            |
| 205Tl (KED) | 0.035 ppb             | 1.6 %             |
| 208Pb (KED) | 2.580 ppb             | 2.3 %             |
| 209Bi (KED) | 87.496 %              | 1.5 %             |
| 232Th (KED) | 0.602 ppb             | 3.4 %             |
| 238U (KED)  | 0.148 ppb             | 1.8 %             |

| Category   | Concentration average | Intensity average | Intensity RSD |
|------------|-----------------------|-------------------|---------------|
| 6Li (KED)  | 121.317 %             | 5,567 cps         | 1.6 %         |
| 9Be (KED)  | 0.047 ppb             | 6 cps             | 69.3 %        |
| 11B (KED)  | -13.083 ppb           | 563 cps           | 7.0 %         |
| 24Mg (KED) | 1,528.734 ppb         | 627,187 cps       | 1.3 %         |
| 27Al (KED) | 1,556.275 ppb         | 164,600 cps       | 1.2 %         |

| Category    | Concentration average | Intensity average | Intensity RSD |
|-------------|-----------------------|-------------------|---------------|
| 45Sc (KED)  | 130.920 %             | 75,140 cps        | 1.8 %         |
| 51V (KED)   | 3.285 ppb             | 21,315 cps        | 1.7 %         |
| 52Cr (KED)  | 4.283 ppb             | 43,769 cps        | 0.8 %         |
| 55Mn (KED)  | 50.144 ppb            | 252,131 cps       | 1.6 %         |
| 56Fe (KED)  | 2,124.612 ppb         | 19,559,430 cps    | 2.1 %         |
| 58Ni (KED)  | 9.446 ppb             | 116,023 cps       | 0.7 %         |
| 59Co (KED)  | 0.961 ppb             | 19,397 cps        | 7.6 %         |
| 63Cu (KED)  | 14.153 ppb            | 191,421 cps       | 2.5 %         |
| 64Zn (KED)  | 155.501 ppb           | 538,456 cps       | 1.6 %         |
| 69Ga (KED)  | 4.283 ppb             | 18,842 cps        | 1.6 %         |
| 75As (KED)  | 1.468 ppb             | 1,511 cps         | 6.2 %         |
| 80Se (KED)  | 0.512 ppb             | 1,026 cps         | 2.3 %         |
| 85Rb (KED)  | 4.746 ppb             | 20,451 cps        | 0.6 %         |
| 88Sr (KED)  | 17.461 ppb            | 107,191 cps       | 1.1 %         |
| 89Y (KED)   | 117.417 %             | 671,098 cps       | 2.5 %         |
| 107Ag (KED) | 0.057 ppb             | 2,450 cps         | 3.4 %         |
| 114Cd (KED) | 0.045 ppb             | 727 cps           | 6.8 %         |
| 115In (KED) | 104.486 %             | 1,230,727 cps     | 0.3 %         |
| 133Cs (KED) | 0.427 ppb             | 9,469 cps         | 2.1 %         |
| 138Ba (KED) | 16.081 ppb            | 522,173 cps       | 0.7 %         |
| 139La (KED) | 1.590 ppb             | 109,702 cps       | 1.0 %         |
| 140Ce (KED) | 3.221 ppb             | 297,389 cps       | 1.1 %         |
| 141Pr (KED) | 0.383 ppb             | 37,330 cps        | 1.5 %         |
| 142Nd (KED) | 2.023 ppb             | 79,179 cps        | 0.9 %         |
| 152Sm (KED) | 0.300 ppb             | 11,162 cps        | 0.2 %         |
| 153Eu (KED) | 0.057 ppb             | 4,374 cps         | 1.1 %         |
| 158Gd (KED) | 0.253 ppb             | 13,612 cps        | 3.9 %         |
| 159Tb (KED) | 103.771 %             | 7,600,903 cps     | 1.9 %         |
| 164Dy (KED) | 0.176 ppb             | 10,703 cps        | 1.9 %         |
| 166Er (KED) | 0.086 ppb             | 7,019 cps         | 2.1 %         |
| 169Tm (KED) | 0.011 ppb             | 2,806 cps         | 2.1 %         |
| 174Yb (KED) | 0.069 ppb             | 6,358 cps         | 1.8 %         |
| 175Lu (KED) | -0.087 ppb            | 39,124 cps        | 2.1 %         |
| 205Tl (KED) | 0.035 ppb             | 5,761 cps         | 2.2 %         |
| 208Pb (KED) | 2.580 ppb             | 304,954 cps       | 0.7 %         |
| 209Bi (KED) | 87.496 %              | 6,349,521 cps     | 1.5 %         |
| 232Th (KED) | 0.602 ppb             | 143,368 cps       | 1.8 %         |
| 238U (KED)  | 0.148 ppb             | 41,645 cps        | 2.5 %         |

## Sample Summary

Instrument ID: iCAP Q

Analysis index: 14

Analysis name: 051979(179210)jian

Analysis started at: 9/26/2021 3:18:46 PM

User name: WINDOWS-UPCI4ER\Administrator

| Category    | Concentration average | Concentration RSD |
|-------------|-----------------------|-------------------|
| 6Li (KED)   | 118.023 %             | 4.6 %             |
| 9Be (KED)   | 0.048 ppb             | 127.2 %           |
| 11B (KED)   | -16.719 ppb           | 3.1 %             |
| 24Mg (KED)  | 768.697 ppb           | 4.1 %             |
| 27Al (KED)  | 953.967 ppb           | 0.7 %             |
| 45Sc (KED)  | 125.966 %             | 1.1 %             |
| 51V (KED)   | 1.873 ppb             | 1.2 %             |
| 52Cr (KED)  | 2.101 ppb             | 1.6 %             |
| 55Mn (KED)  | 26.144 ppb            | 1.2 %             |
| 56Fe (KED)  | 1,085.341 ppb         | 0.7 %             |
| 58Ni (KED)  | 4.683 ppb             | 0.7 %             |
| 59Co (KED)  | 0.463 ppb             | 1.7 %             |
| 63Cu (KED)  | 8.627 ppb             | 1.5 %             |
| 64Zn (KED)  | 164.556 ppb           | 1.7 %             |
| 69Ga (KED)  | 2.305 ppb             | 1.9 %             |
| 75As (KED)  | 0.649 ppb             | 2.9 %             |
| 80Se (KED)  | 0.410 ppb             | 8.7 %             |
| 85Rb (KED)  | 2.519 ppb             | 2.8 %             |
| 88Sr (KED)  | 9.200 ppb             | 1.5 %             |
| 89Y (KED)   | 114.653 %             | 1.0 %             |
| 107Ag (KED) | 0.022 ppb             | 3.0 %             |
| 114Cd (KED) | 0.028 ppb             | 8.7 %             |
| 115In (KED) | 105.014 %             | 1.5 %             |
| 133Cs (KED) | 0.224 ppb             | 4.4 %             |
| 138Ba (KED) | 8.086 ppb             | 1.5 %             |
| 139La (KED) | 0.891 ppb             | 0.6 %             |
| 140Ce (KED) | 1.859 ppb             | 0.8 %             |
| 141Pr (KED) | 0.215 ppb             | 1.8 %             |
| 142Nd (KED) | 1.165 ppb             | 1.8 %             |
| 152Sm (KED) | 0.168 ppb             | 3.7 %             |
| 153Eu (KED) | 0.031 ppb             | 5.0 %             |
| 158Gd (KED) | 0.136 ppb             | 1.1 %             |
| 159Tb (KED) | 105.400 %             | 0.8 %             |
| 164Dy (KED) | 0.097 ppb             | 3.0 %             |
| 166Er (KED) | 0.054 ppb             | 4.4 %             |
| 169Tm (KED) | 0.006 ppb             | 0.8 %             |
| 174Yb (KED) | 0.037 ppb             | 2.5 %             |
| 175Lu (KED) | -0.112 ppb            | 6.6 %             |
| 205Tl (KED) | 0.016 ppb             | 5.7 %             |
| 208Pb (KED) | 1.210 ppb             | 2.5 %             |
| 209Bi (KED) | 88.414 %              | 1.6 %             |
| 232Th (KED) | 0.330 ppb             | 0.7 %             |
| 238U (KED)  | 0.076 ppb             | 1.7 %             |

| Category   | Concentration average | Intensity average | Intensity RSD |
|------------|-----------------------|-------------------|---------------|
| 6Li (KED)  | 118.023 %             | 5,416 cps         | 4.6 %         |
| 9Be (KED)  | 0.048 ppb             | 6 cps             | 124.9 %       |
| 11B (KED)  | -16.719 ppb           | 351 cps           | 7.1 %         |
| 24Mg (KED) | 768.697 ppb           | 306,614 cps       | 0.7 %         |
| 27Al (KED) | 953.967 ppb           | 97,122 cps        | 1.7 %         |

| Category    | Concentration average | Intensity average | Intensity RSD |
|-------------|-----------------------|-------------------|---------------|
| 45Sc (KED)  | 125.966 %             | 72,296 cps        | 1.1 %         |
| 51V (KED)   | 1.873 ppb             | 11,697 cps        | 1.9 %         |
| 52Cr (KED)  | 2.101 ppb             | 20,708 cps        | 1.4 %         |
| 55Mn (KED)  | 26.144 ppb            | 126,541 cps       | 2.1 %         |
| 56Fe (KED)  | 1,085.341 ppb         | 9,614,169 cps     | 0.7 %         |
| 58Ni (KED)  | 4.683 ppb             | 56,634 cps        | 1.0 %         |
| 59Co (KED)  | 0.463 ppb             | 9,020 cps         | 2.3 %         |
| 63Cu (KED)  | 8.627 ppb             | 114,215 cps       | 0.6 %         |
| 64Zn (KED)  | 164.556 ppb           | 556,258 cps       | 0.8 %         |
| 69Ga (KED)  | 2.305 ppb             | 9,928 cps         | 2.5 %         |
| 75As (KED)  | 0.649 ppb             | 662 cps           | 3.4 %         |
| 80Se (KED)  | 0.410 ppb             | 972 cps           | 1.4 %         |
| 85Rb (KED)  | 2.519 ppb             | 10,617 cps        | 3.0 %         |
| 88Sr (KED)  | 9.200 ppb             | 55,209 cps        | 1.2 %         |
| 89Y (KED)   | 114.653 %             | 655,301 cps       | 1.0 %         |
| 107Ag (KED) | 0.022 ppb             | 1,096 cps         | 3.6 %         |
| 114Cd (KED) | 0.028 ppb             | 479 cps           | 6.3 %         |
| 115In (KED) | 105.014 %             | 1,236,938 cps     | 1.5 %         |
| 133Cs (KED) | 0.224 ppb             | 5,000 cps         | 5.3 %         |
| 138Ba (KED) | 8.086 ppb             | 267,229 cps       | 0.7 %         |
| 139La (KED) | 0.891 ppb             | 62,486 cps        | 1.5 %         |
| 140Ce (KED) | 1.859 ppb             | 174,462 cps       | 1.0 %         |
| 141Pr (KED) | 0.215 ppb             | 21,320 cps        | 1.3 %         |
| 142Nd (KED) | 1.165 ppb             | 46,352 cps        | 1.1 %         |
| 152Sm (KED) | 0.168 ppb             | 6,356 cps         | 3.8 %         |
| 153Eu (KED) | 0.031 ppb             | 2,424 cps         | 5.2 %         |
| 158Gd (KED) | 0.136 ppb             | 7,420 cps         | 0.3 %         |
| 159Tb (KED) | 105.400 %             | 7,720,161 cps     | 0.8 %         |
| 164Dy (KED) | 0.097 ppb             | 6,030 cps         | 3.4 %         |
| 166Er (KED) | 0.054 ppb             | 4,719 cps         | 3.4 %         |
| 169Tm (KED) | 0.006 ppb             | 1,585 cps         | 0.3 %         |
| 174Yb (KED) | 0.037 ppb             | 3,525 cps         | 2.4 %         |
| 175Lu (KED) | -0.112 ppb            | 36,149 cps        | 2.9 %         |
| 205Tl (KED) | 0.016 ppb             | 2,678 cps         | 7.1 %         |
| 208Pb (KED) | 1.210 ppb             | 151,585 cps       | 2.1 %         |
| 209Bi (KED) | 88.414 %              | 6,416,168 cps     | 1.6 %         |
| 232Th (KED) | 0.330 ppb             | 79,564 cps        | 2.0 %         |
| 238U (KED)  | 0.076 ppb             | 21,648 cps        | 0.4 %         |

## Sample Summary

Instrument ID: iCAP Q

Analysis index: 15

Analysis name: 04658(00024)jian

Analysis started at: 9/26/2021 3:22:10 PM

User name: WINDOWS-UPCI4ER\Administrator

| Category    | Concentration average | Concentration RSD |
|-------------|-----------------------|-------------------|
| 6Li (KED)   | 116.666 %             | 0.9 %             |
| 9Be (KED)   | 0.020 ppb             | 173.2 %           |
| 11B (KED)   | -0.209 ppb            | 1,174.2 %         |
| 24Mg (KED)  | 779.745 ppb           | 2.4 %             |
| 27Al (KED)  | 884.557 ppb           | 1.3 %             |
| 45Sc (KED)  | 126.246 %             | 2.4 %             |
| 51V (KED)   | 1.686 ppb             | 1.7 %             |
| 52Cr (KED)  | 2.739 ppb             | 4.1 %             |
| 55Mn (KED)  | 25.675 ppb            | 1.6 %             |
| 56Fe (KED)  | 1,047.577 ppb         | 3.2 %             |
| 58Ni (KED)  | 5.287 ppb             | 2.8 %             |
| 59Co (KED)  | 0.471 ppb             | 3.0 %             |
| 63Cu (KED)  | 15.019 ppb            | 1.5 %             |
| 64Zn (KED)  | 167.439 ppb           | 2.1 %             |
| 69Ga (KED)  | 2.499 ppb             | 3.3 %             |
| 75As (KED)  | 0.965 ppb             | 4.4 %             |
| 80Se (KED)  | 0.237 ppb             | 36.2 %            |
| 85Rb (KED)  | 3.719 ppb             | 2.5 %             |
| 88Sr (KED)  | 9.738 ppb             | 0.2 %             |
| 89Y (KED)   | 116.210 %             | 1.6 %             |
| 107Ag (KED) | 0.086 ppb             | 1.4 %             |
| 114Cd (KED) | 0.048 ppb             | 7.0 %             |
| 115In (KED) | 104.726 %             | 0.7 %             |
| 133Cs (KED) | 0.218 ppb             | 3.3 %             |
| 138Ba (KED) | 9.260 ppb             | 2.0 %             |
| 139La (KED) | 0.785 ppb             | 1.2 %             |
| 140Ce (KED) | 1.691 ppb             | 2.5 %             |
| 141Pr (KED) | 0.201 ppb             | 0.7 %             |
| 142Nd (KED) | 1.063 ppb             | 1.8 %             |
| 152Sm (KED) | 0.158 ppb             | 2.9 %             |
| 153Eu (KED) | 0.027 ppb             | 1.6 %             |
| 158Gd (KED) | 0.127 ppb             | 1.3 %             |
| 159Tb (KED) | 105.455 %             | 1.1 %             |
| 164Dy (KED) | 0.088 ppb             | 2.3 %             |
| 166Er (KED) | 0.041 ppb             | 4.4 %             |
| 169Tm (KED) | 0.005 ppb             | 3.3 %             |
| 174Yb (KED) | 0.033 ppb             | 3.9 %             |
| 175Lu (KED) | -0.115 ppb            | 5.5 %             |
| 205Tl (KED) | 0.021 ppb             | 0.9 %             |
| 208Pb (KED) | 1.938 ppb             | 0.2 %             |
| 209Bi (KED) | 88.482 %              | 1.1 %             |
| 232Th (KED) | 0.297 ppb             | 2.0 %             |
| 238U (KED)  | 0.076 ppb             | 0.6 %             |

| Category   | Concentration average | Intensity average | Intensity RSD |
|------------|-----------------------|-------------------|---------------|
| 6Li (KED)  | 116.666 %             | 5,353 cps         | 0.9 %         |
| 9Be (KED)  | 0.020 ppb             | 2 cps             | 173.2 %       |
| 11B (KED)  | -0.209 ppb            | 1,229 cps         | 10.6 %        |
| 24Mg (KED) | 779.745 ppb           | 307,791 cps       | 1.8 %         |
| 27Al (KED) | 884.557 ppb           | 90,244 cps        | 1.7 %         |

| Category    | Concentration average | Intensity average | Intensity RSD |
|-------------|-----------------------|-------------------|---------------|
| 45Sc (KED)  | 126.246 %             | 72,458 cps        | 2.4 %         |
| 51V (KED)   | 1.686 ppb             | 10,548 cps        | 2.2 %         |
| 52Cr (KED)  | 2.739 ppb             | 27,011 cps        | 2.4 %         |
| 55Mn (KED)  | 25.675 ppb            | 124,519 cps       | 1.7 %         |
| 56Fe (KED)  | 1,047.577 ppb         | 9,296,313 cps     | 1.1 %         |
| 58Ni (KED)  | 5.287 ppb             | 63,723 cps        | 1.5 %         |
| 59Co (KED)  | 0.471 ppb             | 9,191 cps         | 4.9 %         |
| 63Cu (KED)  | 15.019 ppb            | 200,972 cps       | 0.6 %         |
| 64Zn (KED)  | 167.439 ppb           | 573,577 cps       | 0.5 %         |
| 69Ga (KED)  | 2.499 ppb             | 10,904 cps        | 3.1 %         |
| 75As (KED)  | 0.965 ppb             | 989 cps           | 2.9 %         |
| 80Se (KED)  | 0.237 ppb             | 934 cps           | 3.9 %         |
| 85Rb (KED)  | 3.719 ppb             | 15,873 cps        | 2.8 %         |
| 88Sr (KED)  | 9.738 ppb             | 59,228 cps        | 1.4 %         |
| 89Y (KED)   | 116.210 %             | 664,203 cps       | 1.6 %         |
| 107Ag (KED) | 0.086 ppb             | 3,609 cps         | 0.7 %         |
| 114Cd (KED) | 0.048 ppb             | 771 cps           | 5.8 %         |
| 115In (KED) | 104.726 %             | 1,233,550 cps     | 0.7 %         |
| 133Cs (KED) | 0.218 ppb             | 4,851 cps         | 3.1 %         |
| 138Ba (KED) | 9.260 ppb             | 306,020 cps       | 1.0 %         |
| 139La (KED) | 0.785 ppb             | 55,123 cps        | 0.2 %         |
| 140Ce (KED) | 1.691 ppb             | 158,712 cps       | 1.5 %         |
| 141Pr (KED) | 0.201 ppb             | 19,952 cps        | 0.6 %         |
| 142Nd (KED) | 1.063 ppb             | 42,325 cps        | 1.0 %         |
| 152Sm (KED) | 0.158 ppb             | 5,971 cps         | 2.6 %         |
| 153Eu (KED) | 0.027 ppb             | 2,147 cps         | 0.9 %         |
| 158Gd (KED) | 0.127 ppb             | 6,945 cps         | 0.3 %         |
| 159Tb (KED) | 105.455 %             | 7,724,232 cps     | 1.1 %         |
| 164Dy (KED) | 0.088 ppb             | 5,497 cps         | 1.4 %         |
| 166Er (KED) | 0.041 ppb             | 3,786 cps         | 4.6 %         |
| 169Tm (KED) | 0.005 ppb             | 1,417 cps         | 3.9 %         |
| 174Yb (KED) | 0.033 ppb             | 3,145 cps         | 3.5 %         |
| 175Lu (KED) | -0.115 ppb            | 35,774 cps        | 2.5 %         |
| 205Tl (KED) | 0.021 ppb             | 3,528 cps         | 0.4 %         |
| 208Pb (KED) | 1.938 ppb             | 234,989 cps       | 1.0 %         |
| 209Bi (KED) | 88.482 %              | 6,421,100 cps     | 1.1 %         |
| 232Th (KED) | 0.297 ppb             | 71,663 cps        | 0.9 %         |
| 238U (KED)  | 0.076 ppb             | 21,670 cps        | 1.1 %         |

## Sample Summary

Instrument ID: iCAP Q

Analysis index: 16

Analysis name: 048645(00021)jian

Analysis started at: 9/26/2021 3:25:52 PM

User name: WINDOWS-UPCI4ER\Administrator

| Category    | Concentration average | Concentration RSD |
|-------------|-----------------------|-------------------|
| 6Li (KED)   | 120.034 %             | 3.0 %             |
| 9Be (KED)   | 0.018 ppb             | 173.2 %           |
| 11B (KED)   | -12.635 ppb           | 5.5 %             |
| 24Mg (KED)  | 976.400 ppb           | 3.8 %             |
| 27Al (KED)  | 1,081.795 ppb         | 0.7 %             |
| 45Sc (KED)  | 128.686 %             | 1.2 %             |
| 51V (KED)   | 2.170 ppb             | 1.1 %             |
| 52Cr (KED)  | 2.659 ppb             | 0.9 %             |
| 55Mn (KED)  | 32.162 ppb            | 2.3 %             |
| 56Fe (KED)  | 1,363.323 ppb         | 2.0 %             |
| 58Ni (KED)  | 6.306 ppb             | 0.5 %             |
| 59Co (KED)  | 0.592 ppb             | 0.8 %             |
| 63Cu (KED)  | 12.009 ppb            | 1.0 %             |
| 64Zn (KED)  | 157.135 ppb           | 1.2 %             |
| 69Ga (KED)  | 2.912 ppb             | 1.9 %             |
| 75As (KED)  | 1.014 ppb             | 3.9 %             |
| 80Se (KED)  | 0.273 ppb             | 126.1 %           |
| 85Rb (KED)  | 3.327 ppb             | 2.3 %             |
| 88Sr (KED)  | 11.395 ppb            | 1.3 %             |
| 89Y (KED)   | 116.630 %             | 1.4 %             |
| 107Ag (KED) | 0.082 ppb             | 4.9 %             |
| 114Cd (KED) | 0.042 ppb             | 9.0 %             |
| 115In (KED) | 104.930 %             | 1.1 %             |
| 133Cs (KED) | 0.274 ppb             | 2.2 %             |
| 138Ba (KED) | 10.401 ppb            | 0.2 %             |
| 139La (KED) | 0.998 ppb             | 0.6 %             |
| 140Ce (KED) | 2.100 ppb             | 0.8 %             |
| 141Pr (KED) | 0.242 ppb             | 1.3 %             |
| 142Nd (KED) | 1.318 ppb             | 1.5 %             |
| 152Sm (KED) | 0.189 ppb             | 1.2 %             |
| 153Eu (KED) | 0.036 ppb             | 4.3 %             |
| 158Gd (KED) | 0.159 ppb             | 1.3 %             |
| 159Tb (KED) | 107.945 %             | 0.7 %             |
| 164Dy (KED) | 0.111 ppb             | 2.1 %             |
| 166Er (KED) | 0.051 ppb             | 6.0 %             |
| 169Tm (KED) | 0.006 ppb             | 6.3 %             |
| 174Yb (KED) | 0.042 ppb             | 2.3 %             |
| 175Lu (KED) | -0.117 ppb            | 6.2 %             |
| 205Tl (KED) | 0.024 ppb             | 2.0 %             |
| 208Pb (KED) | 1.698 ppb             | 2.4 %             |
| 209Bi (KED) | 88.528 %              | 1.5 %             |
| 232Th (KED) | 0.405 ppb             | 1.0 %             |
| 238U (KED)  | 0.099 ppb             | 0.1 %             |

| Category   | Concentration average | Intensity average | Intensity RSD |
|------------|-----------------------|-------------------|---------------|
| 6Li (KED)  | 120.034 %             | 5,508 cps         | 3.0 %         |
| 9Be (KED)  | 0.018 ppb             | 2 cps             | 173.2 %       |
| 11B (KED)  | -12.635 ppb           | 582 cps           | 8.5 %         |
| 24Mg (KED) | 976.400 ppb           | 396,248 cps       | 1.3 %         |
| 27Al (KED) | 1,081.795 ppb         | 112,493 cps       | 0.5 %         |

| Category    | Concentration average | Intensity average | Intensity RSD |
|-------------|-----------------------|-------------------|---------------|
| 45Sc (KED)  | 128.686 %             | 73,858 cps        | 1.2 %         |
| 51V (KED)   | 2.170 ppb             | 13,845 cps        | 2.3 %         |
| 52Cr (KED)  | 2.659 ppb             | 26,746 cps        | 1.8 %         |
| 55Mn (KED)  | 32.162 ppb            | 158,968 cps       | 1.2 %         |
| 56Fe (KED)  | 1,363.323 ppb         | 12,335,394 cps    | 1.0 %         |
| 58Ni (KED)  | 6.306 ppb             | 77,010 cps        | 1.2 %         |
| 59Co (KED)  | 0.592 ppb             | 11,754 cps        | 0.5 %         |
| 63Cu (KED)  | 12.009 ppb            | 161,452 cps       | 1.2 %         |
| 64Zn (KED)  | 157.135 ppb           | 540,484 cps       | 1.0 %         |
| 69Ga (KED)  | 2.912 ppb             | 12,743 cps        | 1.8 %         |
| 75As (KED)  | 1.014 ppb             | 1,042 cps         | 4.4 %         |
| 80Se (KED)  | 0.273 ppb             | 948 cps           | 10.4 %        |
| 85Rb (KED)  | 3.327 ppb             | 14,258 cps        | 3.6 %         |
| 88Sr (KED)  | 11.395 ppb            | 69,529 cps        | 0.7 %         |
| 89Y (KED)   | 116.630 %             | 666,598 cps       | 1.4 %         |
| 107Ag (KED) | 0.082 ppb             | 3,495 cps         | 5.5 %         |
| 114Cd (KED) | 0.042 ppb             | 696 cps           | 7.4 %         |
| 115In (KED) | 104.930 %             | 1,235,948 cps     | 1.1 %         |
| 133Cs (KED) | 0.274 ppb             | 6,117 cps         | 2.2 %         |
| 138Ba (KED) | 10.401 ppb            | 351,743 cps       | 0.5 %         |
| 139La (KED) | 0.998 ppb             | 71,676 cps        | 1.2 %         |
| 140Ce (KED) | 2.100 ppb             | 201,766 cps       | 0.5 %         |
| 141Pr (KED) | 0.242 ppb             | 24,610 cps        | 1.2 %         |
| 142Nd (KED) | 1.318 ppb             | 53,685 cps        | 1.2 %         |
| 152Sm (KED) | 0.189 ppb             | 7,320 cps         | 1.5 %         |
| 153Eu (KED) | 0.036 ppb             | 2,900 cps         | 3.5 %         |
| 158Gd (KED) | 0.159 ppb             | 8,892 cps         | 1.3 %         |
| 159Tb (KED) | 107.945 %             | 7,906,612 cps     | 0.7 %         |
| 164Dy (KED) | 0.111 ppb             | 7,025 cps         | 1.7 %         |
| 166Er (KED) | 0.051 ppb             | 4,649 cps         | 5.5 %         |
| 169Tm (KED) | 0.006 ppb             | 1,773 cps         | 5.7 %         |
| 174Yb (KED) | 0.042 ppb             | 4,075 cps         | 1.6 %         |
| 175Lu (KED) | -0.117 ppb            | 36,322 cps        | 2.4 %         |
| 205Tl (KED) | 0.024 ppb             | 3,970 cps         | 1.6 %         |
| 208Pb (KED) | 1.698 ppb             | 207,615 cps       | 0.9 %         |
| 209Bi (KED) | 88.528 %              | 6,424,421 cps     | 1.5 %         |
| 232Th (KED) | 0.405 ppb             | 97,747 cps        | 0.5 %         |
| 238U (KED)  | 0.099 ppb             | 28,301 cps        | 1.5 %         |

## Sample Summary

Instrument ID: iCAP Q

Analysis index: 17

Analysis name: 038769(00022)jian

Analysis started at: 9/26/2021 3:29:20 PM

User name: WINDOWS-UPCI4ER\Administrator

| Category    | Concentration average | Concentration RSD |
|-------------|-----------------------|-------------------|
| 6Li (KED)   | 115.746 %             | 2.6 %             |
| 9Be (KED)   | 0.009 ppb             | 173.2 %           |
| 11B (KED)   | -12.041 ppb           | 8.6 %             |
| 24Mg (KED)  | 882.259 ppb           | 2.6 %             |
| 27Al (KED)  | 992.982 ppb           | 0.1 %             |
| 45Sc (KED)  | 127.210 %             | 0.8 %             |
| 51V (KED)   | 1.995 ppb             | 1.7 %             |
| 52Cr (KED)  | 2.979 ppb             | 0.7 %             |
| 55Mn (KED)  | 29.645 ppb            | 1.4 %             |
| 56Fe (KED)  | 1,220.389 ppb         | 0.2 %             |
| 58Ni (KED)  | 5.335 ppb             | 0.5 %             |
| 59Co (KED)  | 0.546 ppb             | 1.1 %             |
| 63Cu (KED)  | 11.052 ppb            | 1.4 %             |
| 64Zn (KED)  | 154.923 ppb           | 1.1 %             |
| 69Ga (KED)  | 2.468 ppb             | 4.7 %             |
| 75As (KED)  | 0.842 ppb             | 2.2 %             |
| 80Se (KED)  | 0.693 ppb             | 21.3 %            |
| 85Rb (KED)  | 3.178 ppb             | 0.4 %             |
| 88Sr (KED)  | 10.743 ppb            | 1.4 %             |
| 89Y (KED)   | 116.552 %             | 1.0 %             |
| 107Ag (KED) | 0.047 ppb             | 2.5 %             |
| 114Cd (KED) | 0.095 ppb             | 4.6 %             |
| 115In (KED) | 106.656 %             | 0.6 %             |
| 133Cs (KED) | 0.250 ppb             | 1.8 %             |
| 138Ba (KED) | 9.147 ppb             | 1.5 %             |
| 139La (KED) | 0.897 ppb             | 2.0 %             |
| 140Ce (KED) | 1.938 ppb             | 1.2 %             |
| 141Pr (KED) | 0.224 ppb             | 1.7 %             |
| 142Nd (KED) | 1.203 ppb             | 1.6 %             |
| 152Sm (KED) | 0.172 ppb             | 3.3 %             |
| 153Eu (KED) | 0.032 ppb             | 3.5 %             |
| 158Gd (KED) | 0.144 ppb             | 1.3 %             |
| 159Tb (KED) | 108.110 %             | 1.1 %             |
| 164Dy (KED) | 0.105 ppb             | 5.1 %             |
| 166Er (KED) | 0.047 ppb             | 4.8 %             |
| 169Tm (KED) | 0.006 ppb             | 5.1 %             |
| 174Yb (KED) | 0.040 ppb             | 3.2 %             |
| 175Lu (KED) | -0.123 ppb            | 5.6 %             |
| 205Tl (KED) | 0.020 ppb             | 5.6 %             |
| 208Pb (KED) | 1.494 ppb             | 1.8 %             |
| 209Bi (KED) | 90.821 %              | 0.6 %             |
| 232Th (KED) | 0.356 ppb             | 2.1 %             |
| 238U (KED)  | 0.086 ppb             | 2.5 %             |

| Category   | Concentration average | Intensity average | Intensity RSD |
|------------|-----------------------|-------------------|---------------|
| 6Li (KED)  | 115.746 %             | 5,311 cps         | 2.6 %         |
| 9Be (KED)  | 0.009 ppb             | 1 cps             | 173.2 %       |
| 11B (KED)  | -12.041 ppb           | 593 cps           | 11.7 %        |
| 24Mg (KED) | 882.259 ppb           | 345,370 cps       | 0.0 %         |
| 27Al (KED) | 992.982 ppb           | 102,084 cps       | 0.7 %         |

| Category    | Concentration average | Intensity average | Intensity RSD |
|-------------|-----------------------|-------------------|---------------|
| 45Sc (KED)  | 127.210 %             | 73,011 cps        | 0.8 %         |
| 51V (KED)   | 1.995 ppb             | 12,581 cps        | 0.9 %         |
| 52Cr (KED)  | 2.979 ppb             | 29,608 cps        | 0.5 %         |
| 55Mn (KED)  | 29.645 ppb            | 144,872 cps       | 0.7 %         |
| 56Fe (KED)  | 1,220.389 ppb         | 10,917,427 cps    | 0.9 %         |
| 58Ni (KED)  | 5.335 ppb             | 64,794 cps        | 1.2 %         |
| 59Co (KED)  | 0.546 ppb             | 10,722 cps        | 1.1 %         |
| 63Cu (KED)  | 11.052 ppb            | 148,545 cps       | 0.8 %         |
| 64Zn (KED)  | 154.923 ppb           | 532,569 cps       | 0.2 %         |
| 69Ga (KED)  | 2.468 ppb             | 10,799 cps        | 3.8 %         |
| 75As (KED)  | 0.842 ppb             | 868 cps           | 1.3 %         |
| 80Se (KED)  | 0.693 ppb             | 1,072 cps         | 3.3 %         |
| 85Rb (KED)  | 3.178 ppb             | 13,607 cps        | 0.7 %         |
| 88Sr (KED)  | 10.743 ppb            | 65,518 cps        | 1.0 %         |
| 89Y (KED)   | 116.552 %             | 666,156 cps       | 1.0 %         |
| 107Ag (KED) | 0.047 ppb             | 2,122 cps         | 1.9 %         |
| 114Cd (KED) | 0.095 ppb             | 1,492 cps         | 4.2 %         |
| 115In (KED) | 106.656 %             | 1,256,288 cps     | 0.6 %         |
| 133Cs (KED) | 0.250 ppb             | 5,676 cps         | 2.1 %         |
| 138Ba (KED) | 9.147 ppb             | 309,899 cps       | 0.7 %         |
| 139La (KED) | 0.897 ppb             | 64,524 cps        | 1.0 %         |
| 140Ce (KED) | 1.938 ppb             | 186,473 cps       | 0.5 %         |
| 141Pr (KED) | 0.224 ppb             | 22,830 cps        | 0.6 %         |
| 142Nd (KED) | 1.203 ppb             | 49,083 cps        | 0.6 %         |
| 152Sm (KED) | 0.172 ppb             | 6,685 cps         | 4.4 %         |
| 153Eu (KED) | 0.032 ppb             | 2,552 cps         | 4.6 %         |
| 158Gd (KED) | 0.144 ppb             | 8,092 cps         | 2.3 %         |
| 159Tb (KED) | 108.110 %             | 7,918,676 cps     | 1.1 %         |
| 164Dy (KED) | 0.105 ppb             | 6,686 cps         | 6.0 %         |
| 166Er (KED) | 0.047 ppb             | 4,349 cps         | 3.9 %         |
| 169Tm (KED) | 0.006 ppb             | 1,717 cps         | 5.0 %         |
| 174Yb (KED) | 0.040 ppb             | 3,852 cps         | 3.7 %         |
| 175Lu (KED) | -0.123 ppb            | 35,386 cps        | 2.0 %         |
| 205Tl (KED) | 0.020 ppb             | 3,375 cps         | 5.1 %         |
| 208Pb (KED) | 1.494 ppb             | 189,094 cps       | 1.5 %         |
| 209Bi (KED) | 90.821 %              | 6,590,849 cps     | 0.6 %         |
| 232Th (KED) | 0.356 ppb             | 88,281 cps        | 2.5 %         |
| 238U (KED)  | 0.086 ppb             | 25,185 cps        | 2.7 %         |

## Sample Summary

Instrument ID: iCAP Q

Analysis index: 18

Analysis name: 038625(00023)jian

Analysis started at: 9/26/2021 3:32:49 PM

User name: WINDOWS-UPCI4ER\Administrator

| Category    | Concentration average | Concentration RSD |
|-------------|-----------------------|-------------------|
| 6Li (KED)   | 121.826 %             | 0.2 %             |
| 9Be (KED)   | 0.065 ppb             | 65.2 %            |
| 11B (KED)   | -13.699 ppb           | 5.6 %             |
| 24Mg (KED)  | 1,169.851 ppb         | 0.6 %             |
| 27Al (KED)  | 1,219.413 ppb         | 1.7 %             |
| 45Sc (KED)  | 129.440 %             | 0.8 %             |
| 51V (KED)   | 2.518 ppb             | 0.5 %             |
| 52Cr (KED)  | 2.827 ppb             | 0.7 %             |
| 55Mn (KED)  | 37.606 ppb            | 0.7 %             |
| 56Fe (KED)  | 1,566.751 ppb         | 0.4 %             |
| 58Ni (KED)  | 7.287 ppb             | 1.5 %             |
| 59Co (KED)  | 0.696 ppb             | 1.6 %             |
| 63Cu (KED)  | 13.425 ppb            | 1.4 %             |
| 64Zn (KED)  | 168.818 ppb           | 2.5 %             |
| 69Ga (KED)  | 3.257 ppb             | 1.8 %             |
| 75As (KED)  | 1.244 ppb             | 10.6 %            |
| 80Se (KED)  | 0.598 ppb             | 30.6 %            |
| 85Rb (KED)  | 4.218 ppb             | 1.5 %             |
| 88Sr (KED)  | 14.463 ppb            | 2.3 %             |
| 89Y (KED)   | 117.318 %             | 1.6 %             |
| 107Ag (KED) | 0.051 ppb             | 2.6 %             |
| 114Cd (KED) | 0.045 ppb             | 5.0 %             |
| 115In (KED) | 105.358 %             | 0.6 %             |
| 133Cs (KED) | 0.331 ppb             | 1.5 %             |
| 138Ba (KED) | 11.665 ppb            | 0.9 %             |
| 139La (KED) | 1.255 ppb             | 1.4 %             |
| 140Ce (KED) | 2.601 ppb             | 2.4 %             |
| 141Pr (KED) | 0.303 ppb             | 2.1 %             |
| 142Nd (KED) | 1.644 ppb             | 2.5 %             |
| 152Sm (KED) | 0.231 ppb             | 3.0 %             |
| 153Eu (KED) | 0.043 ppb             | 2.7 %             |
| 158Gd (KED) | 0.202 ppb             | 1.6 %             |
| 159Tb (KED) | 105.785 %             | 1.0 %             |
| 164Dy (KED) | 0.135 ppb             | 2.8 %             |
| 166Er (KED) | 0.065 ppb             | 1.9 %             |
| 169Tm (KED) | 0.008 ppb             | 6.8 %             |
| 174Yb (KED) | 0.052 ppb             | 4.8 %             |
| 175Lu (KED) | -0.116 ppb            | 3.7 %             |
| 205Tl (KED) | 0.025 ppb             | 4.0 %             |
| 208Pb (KED) | 1.899 ppb             | 1.6 %             |
| 209Bi (KED) | 88.724 %              | 1.4 %             |
| 232Th (KED) | 0.669 ppb             | 0.9 %             |
| 238U (KED)  | 0.129 ppb             | 2.4 %             |

| Category   | Concentration average | Intensity average | Intensity RSD |
|------------|-----------------------|-------------------|---------------|
| 6Li (KED)  | 121.826 %             | 5,590 cps         | 0.2 %         |
| 9Be (KED)  | 0.065 ppb             | 8 cps             | 65.5 %        |
| 11B (KED)  | -13.699 ppb           | 531 cps           | 7.8 %         |
| 24Mg (KED) | 1,169.851 ppb         | 482,149 cps       | 0.6 %         |
| 27Al (KED) | 1,219.413 ppb         | 127,535 cps       | 1.2 %         |

| Category    | Concentration average | Intensity average | Intensity RSD |
|-------------|-----------------------|-------------------|---------------|
| 45Sc (KED)  | 129.440 %             | 74,291 cps        | 0.8 %         |
| 51V (KED)   | 2.518 ppb             | 16,156 cps        | 1.2 %         |
| 52Cr (KED)  | 2.827 ppb             | 28,605 cps        | 1.4 %         |
| 55Mn (KED)  | 37.606 ppb            | 186,980 cps       | 0.9 %         |
| 56Fe (KED)  | 1,566.751 ppb         | 14,260,617 cps    | 0.5 %         |
| 58Ni (KED)  | 7.287 ppb             | 89,095 cps        | 0.7 %         |
| 59Co (KED)  | 0.696 ppb             | 13,899 cps        | 1.7 %         |
| 63Cu (KED)  | 13.425 ppb            | 181,447 cps       | 1.5 %         |
| 64Zn (KED)  | 168.818 ppb           | 583,765 cps       | 1.0 %         |
| 69Ga (KED)  | 3.257 ppb             | 14,326 cps        | 0.3 %         |
| 75As (KED)  | 1.244 ppb             | 1,281 cps         | 10.2 %        |
| 80Se (KED)  | 0.598 ppb             | 1,051 cps         | 5.4 %         |
| 85Rb (KED)  | 4.218 ppb             | 18,175 cps        | 3.0 %         |
| 88Sr (KED)  | 14.463 ppb            | 88,738 cps        | 2.2 %         |
| 89Y (KED)   | 117.318 %             | 670,534 cps       | 1.6 %         |
| 107Ag (KED) | 0.051 ppb             | 2,257 cps         | 3.0 %         |
| 114Cd (KED) | 0.045 ppb             | 737 cps           | 3.9 %         |
| 115In (KED) | 105.358 %             | 1,240,996 cps     | 0.6 %         |
| 133Cs (KED) | 0.331 ppb             | 7,416 cps         | 1.0 %         |
| 138Ba (KED) | 11.665 ppb            | 386,493 cps       | 1.3 %         |
| 139La (KED) | 1.255 ppb             | 88,336 cps        | 1.1 %         |
| 140Ce (KED) | 2.601 ppb             | 244,793 cps       | 1.7 %         |
| 141Pr (KED) | 0.303 ppb             | 30,194 cps        | 2.2 %         |
| 142Nd (KED) | 1.644 ppb             | 65,613 cps        | 1.8 %         |
| 152Sm (KED) | 0.231 ppb             | 8,762 cps         | 2.0 %         |
| 153Eu (KED) | 0.043 ppb             | 3,386 cps         | 3.5 %         |
| 158Gd (KED) | 0.202 ppb             | 11,078 cps        | 2.2 %         |
| 159Tb (KED) | 105.785 %             | 7,748,379 cps     | 1.0 %         |
| 164Dy (KED) | 0.135 ppb             | 8,405 cps         | 2.3 %         |
| 166Er (KED) | 0.065 ppb             | 5,606 cps         | 0.7 %         |
| 169Tm (KED) | 0.008 ppb             | 2,271 cps         | 7.2 %         |
| 174Yb (KED) | 0.052 ppb             | 4,893 cps         | 3.8 %         |
| 175Lu (KED) | -0.116 ppb            | 35,665 cps        | 1.3 %         |
| 205Tl (KED) | 0.025 ppb             | 4,216 cps         | 3.5 %         |
| 208Pb (KED) | 1.899 ppb             | 231,138 cps       | 0.9 %         |
| 209Bi (KED) | 88.724 %              | 6,438,662 cps     | 1.4 %         |
| 232Th (KED) | 0.669 ppb             | 161,510 cps       | 0.4 %         |
| 238U (KED)  | 0.129 ppb             | 36,932 cps        | 1.6 %         |

## Sample Summary

Instrument ID: iCAP Q

Analysis index: 19

Analysis name: 047180jian

Analysis started at: 9/26/2021 3:36:16 PM

User name: WINDOWS-UPCI4ER\Administrator

| Category    | Concentration average | Concentration RSD |
|-------------|-----------------------|-------------------|
| 6Li (KED)   | 118.314 %             | 3.4 %             |
| 9Be (KED)   | 0.047 ppb             | 90.9 %            |
| 11B (KED)   | -14.200 ppb           | 7.4 %             |
| 24Mg (KED)  | 732.758 ppb           | 2.9 %             |
| 27Al (KED)  | 813.933 ppb           | 1.2 %             |
| 45Sc (KED)  | 129.278 %             | 0.5 %             |
| 51V (KED)   | 1.593 ppb             | 0.9 %             |
| 52Cr (KED)  | 4.063 ppb             | 0.4 %             |
| 55Mn (KED)  | 24.359 ppb            | 0.3 %             |
| 56Fe (KED)  | 979.329 ppb           | 1.4 %             |
| 58Ni (KED)  | 4.897 ppb             | 0.8 %             |
| 59Co (KED)  | 0.420 ppb             | 0.7 %             |
| 63Cu (KED)  | 9.740 ppb             | 2.4 %             |
| 64Zn (KED)  | 182.298 ppb           | 2.0 %             |
| 69Ga (KED)  | 2.139 ppb             | 1.5 %             |
| 75As (KED)  | 0.914 ppb             | 8.3 %             |
| 80Se (KED)  | 0.257 ppb             | 101.9 %           |
| 85Rb (KED)  | 2.776 ppb             | 0.2 %             |
| 88Sr (KED)  | 9.352 ppb             | 1.2 %             |
| 89Y (KED)   | 119.177 %             | 0.8 %             |
| 107Ag (KED) | 0.043 ppb             | 6.1 %             |
| 114Cd (KED) | 0.033 ppb             | 10.2 %            |
| 115In (KED) | 106.458 %             | 0.9 %             |
| 133Cs (KED) | 0.205 ppb             | 2.7 %             |
| 138Ba (KED) | 8.191 ppb             | 2.8 %             |
| 139La (KED) | 0.756 ppb             | 2.1 %             |
| 140Ce (KED) | 1.574 ppb             | 1.7 %             |
| 141Pr (KED) | 0.186 ppb             | 0.8 %             |
| 142Nd (KED) | 0.981 ppb             | 2.4 %             |
| 152Sm (KED) | 0.136 ppb             | 0.6 %             |
| 153Eu (KED) | 0.025 ppb             | 4.1 %             |
| 158Gd (KED) | 0.116 ppb             | 2.2 %             |
| 159Tb (KED) | 106.230 %             | 1.9 %             |
| 164Dy (KED) | 0.082 ppb             | 3.9 %             |
| 166Er (KED) | 0.038 ppb             | 1.1 %             |
| 169Tm (KED) | 0.005 ppb             | 3.6 %             |
| 174Yb (KED) | 0.029 ppb             | 3.8 %             |
| 175Lu (KED) | -0.119 ppb            | 7.5 %             |
| 205Tl (KED) | 0.020 ppb             | 4.8 %             |
| 208Pb (KED) | 1.573 ppb             | 0.2 %             |
| 209Bi (KED) | 88.805 %              | 0.7 %             |
| 232Th (KED) | 0.320 ppb             | 1.1 %             |
| 238U (KED)  | 0.083 ppb             | 1.8 %             |

| Category   | Concentration average | Intensity average | Intensity RSD |
|------------|-----------------------|-------------------|---------------|
| 6Li (KED)  | 118.314 %             | 5,429 cps         | 3.4 %         |
| 9Be (KED)  | 0.047 ppb             | 6 cps             | 91.7 %        |
| 11B (KED)  | -14.200 ppb           | 488 cps           | 9.6 %         |
| 24Mg (KED) | 732.758 ppb           | 293,186 cps       | 0.8 %         |
| 27Al (KED) | 813.933 ppb           | 85,051 cps        | 1.1 %         |

| Category    | Concentration average | Intensity average | Intensity RSD |
|-------------|-----------------------|-------------------|---------------|
| 45Sc (KED)  | 129.278 %             | 74,198 cps        | 0.5 %         |
| 51V (KED)   | 1.593 ppb             | 10,208 cps        | 1.4 %         |
| 52Cr (KED)  | 4.063 ppb             | 41,007 cps        | 0.9 %         |
| 55Mn (KED)  | 24.359 ppb            | 120,999 cps       | 0.3 %         |
| 56Fe (KED)  | 979.329 ppb           | 8,904,075 cps     | 1.7 %         |
| 58Ni (KED)  | 4.897 ppb             | 60,656 cps        | 0.3 %         |
| 59Co (KED)  | 0.420 ppb             | 8,394 cps         | 0.2 %         |
| 63Cu (KED)  | 9.740 ppb             | 133,936 cps       | 1.7 %         |
| 64Zn (KED)  | 182.298 ppb           | 640,209 cps       | 1.2 %         |
| 69Ga (KED)  | 2.139 ppb             | 9,579 cps         | 1.1 %         |
| 75As (KED)  | 0.914 ppb             | 962 cps           | 7.7 %         |
| 80Se (KED)  | 0.257 ppb             | 964 cps           | 8.8 %         |
| 85Rb (KED)  | 2.776 ppb             | 12,159 cps        | 0.9 %         |
| 88Sr (KED)  | 9.352 ppb             | 58,336 cps        | 0.6 %         |
| 89Y (KED)   | 119.177 %             | 681,158 cps       | 0.8 %         |
| 107Ag (KED) | 0.043 ppb             | 1,941 cps         | 4.9 %         |
| 114Cd (KED) | 0.033 ppb             | 569 cps           | 9.5 %         |
| 115In (KED) | 106.458 %             | 1,253,947 cps     | 0.9 %         |
| 133Cs (KED) | 0.205 ppb             | 4,639 cps         | 2.8 %         |
| 138Ba (KED) | 8.191 ppb             | 272,769 cps       | 2.2 %         |
| 139La (KED) | 0.756 ppb             | 53,490 cps        | 0.2 %         |
| 140Ce (KED) | 1.574 ppb             | 148,813 cps       | 0.2 %         |
| 141Pr (KED) | 0.186 ppb             | 18,617 cps        | 1.2 %         |
| 142Nd (KED) | 0.981 ppb             | 39,349 cps        | 0.8 %         |
| 152Sm (KED) | 0.136 ppb             | 5,182 cps         | 2.3 %         |
| 153Eu (KED) | 0.025 ppb             | 1,960 cps         | 2.7 %         |
| 158Gd (KED) | 0.116 ppb             | 6,385 cps         | 1.3 %         |
| 159Tb (KED) | 106.230 %             | 7,781,023 cps     | 1.9 %         |
| 164Dy (KED) | 0.082 ppb             | 5,124 cps         | 1.9 %         |
| 166Er (KED) | 0.038 ppb             | 3,584 cps         | 1.0 %         |
| 169Tm (KED) | 0.005 ppb             | 1,370 cps         | 5.0 %         |
| 174Yb (KED) | 0.029 ppb             | 2,826 cps         | 3.6 %         |
| 175Lu (KED) | -0.119 ppb            | 35,338 cps        | 2.0 %         |
| 205Tl (KED) | 0.020 ppb             | 3,388 cps         | 4.0 %         |
| 208Pb (KED) | 1.573 ppb             | 193,950 cps       | 0.7 %         |
| 209Bi (KED) | 88.805 %              | 6,444,509 cps     | 0.7 %         |
| 232Th (KED) | 0.320 ppb             | 77,534 cps        | 1.3 %         |
| 238U (KED)  | 0.083 ppb             | 23,647 cps        | 1.7 %         |

## Sample Summary

Instrument ID: iCAP Q

Analysis index: 20

Analysis name: 048656jian

Analysis started at: 9/26/2021 3:39:35 PM

User name: WINDOWS-UPCI4ER\Administrator

| Category    | Concentration average | Concentration RSD |
|-------------|-----------------------|-------------------|
| 6Li (KED)   | 119.573 %             | 2.7 %             |
| 9Be (KED)   | 0.065 ppb             | 63.6 %            |
| 11B (KED)   | -14.110 ppb           | 1.1 %             |
| 24Mg (KED)  | 1,151.805 ppb         | 1.7 %             |
| 27Al (KED)  | 1,344.077 ppb         | 1.8 %             |
| 45Sc (KED)  | 129.777 %             | 0.6 %             |
| 51V (KED)   | 2.585 ppb             | 1.9 %             |
| 52Cr (KED)  | 3.459 ppb             | 1.1 %             |
| 55Mn (KED)  | 36.078 ppb            | 1.0 %             |
| 56Fe (KED)  | 1,647.372 ppb         | 0.7 %             |
| 58Ni (KED)  | 7.315 ppb             | 1.4 %             |
| 59Co (KED)  | 0.697 ppb             | 3.6 %             |
| 63Cu (KED)  | 21.695 ppb            | 0.5 %             |
| 64Zn (KED)  | 154.790 ppb           | 1.3 %             |
| 69Ga (KED)  | 3.107 ppb             | 1.9 %             |
| 75As (KED)  | 0.993 ppb             | 12.2 %            |
| 80Se (KED)  | 0.564 ppb             | 34.7 %            |
| 85Rb (KED)  | 3.729 ppb             | 1.5 %             |
| 88Sr (KED)  | 14.750 ppb            | 1.1 %             |
| 89Y (KED)   | 120.042 %             | 0.9 %             |
| 107Ag (KED) | 0.069 ppb             | 2.8 %             |
| 114Cd (KED) | 0.053 ppb             | 6.5 %             |
| 115In (KED) | 107.193 %             | 0.5 %             |
| 133Cs (KED) | 0.316 ppb             | 3.6 %             |
| 138Ba (KED) | 11.697 ppb            | 0.7 %             |
| 139La (KED) | 1.257 ppb             | 2.5 %             |
| 140Ce (KED) | 2.685 ppb             | 3.0 %             |
| 141Pr (KED) | 0.307 ppb             | 4.1 %             |
| 142Nd (KED) | 1.659 ppb             | 1.2 %             |
| 152Sm (KED) | 0.239 ppb             | 5.5 %             |
| 153Eu (KED) | 0.046 ppb             | 2.1 %             |
| 158Gd (KED) | 0.199 ppb             | 4.1 %             |
| 159Tb (KED) | 107.417 %             | 1.6 %             |
| 164Dy (KED) | 0.142 ppb             | 3.2 %             |
| 166Er (KED) | 0.065 ppb             | 4.4 %             |
| 169Tm (KED) | 0.008 ppb             | 0.6 %             |
| 174Yb (KED) | 0.054 ppb             | 1.6 %             |
| 175Lu (KED) | -0.118 ppb            | 1.4 %             |
| 205Tl (KED) | 0.023 ppb             | 3.9 %             |
| 208Pb (KED) | 2.854 ppb             | 1.6 %             |
| 209Bi (KED) | 89.959 %              | 0.9 %             |
| 232Th (KED) | 0.479 ppb             | 2.5 %             |
| 238U (KED)  | 0.117 ppb             | 0.9 %             |

| Category   | Concentration average | Intensity average | Intensity RSD |
|------------|-----------------------|-------------------|---------------|
| 6Li (KED)  | 119.573 %             | 5,487 cps         | 2.7 %         |
| 9Be (KED)  | 0.065 ppb             | 8 cps             | 65.5 %        |
| 11B (KED)  | -14.110 ppb           | 499 cps           | 3.4 %         |
| 24Mg (KED) | 1,151.805 ppb         | 465,794 cps       | 1.2 %         |
| 27Al (KED) | 1,344.077 ppb         | 140,931 cps       | 1.2 %         |

| Category    | Concentration average | Intensity average | Intensity RSD |
|-------------|-----------------------|-------------------|---------------|
| 45Sc (KED)  | 129.777 %             | 74,484 cps        | 0.6 %         |
| 51V (KED)   | 2.585 ppb             | 16,626 cps        | 1.3 %         |
| 52Cr (KED)  | 3.459 ppb             | 35,068 cps        | 1.6 %         |
| 55Mn (KED)  | 36.078 ppb            | 179,856 cps       | 1.3 %         |
| 56Fe (KED)  | 1,647.372 ppb         | 15,033,910 cps    | 1.2 %         |
| 58Ni (KED)  | 7.315 ppb             | 89,666 cps        | 1.6 %         |
| 59Co (KED)  | 0.697 ppb             | 13,951 cps        | 3.1 %         |
| 63Cu (KED)  | 21.695 ppb            | 299,571 cps       | 0.4 %         |
| 64Zn (KED)  | 154.790 ppb           | 548,039 cps       | 0.4 %         |
| 69Ga (KED)  | 3.107 ppb             | 13,992 cps        | 2.1 %         |
| 75As (KED)  | 0.993 ppb             | 1,050 cps         | 11.1 %        |
| 80Se (KED)  | 0.564 ppb             | 1,066 cps         | 6.4 %         |
| 85Rb (KED)  | 3.729 ppb             | 16,441 cps        | 1.9 %         |
| 88Sr (KED)  | 14.750 ppb            | 92,606 cps        | 0.5 %         |
| 89Y (KED)   | 120.042 %             | 686,102 cps       | 0.9 %         |
| 107Ag (KED) | 0.069 ppb             | 3,021 cps         | 2.8 %         |
| 114Cd (KED) | 0.053 ppb             | 877 cps           | 6.2 %         |
| 115In (KED) | 107.193 %             | 1,262,613 cps     | 0.5 %         |
| 133Cs (KED) | 0.316 ppb             | 7,197 cps         | 3.2 %         |
| 138Ba (KED) | 11.697 ppb            | 393,495 cps       | 1.4 %         |
| 139La (KED) | 1.257 ppb             | 89,826 cps        | 1.0 %         |
| 140Ce (KED) | 2.685 ppb             | 256,654 cps       | 2.0 %         |
| 141Pr (KED) | 0.307 ppb             | 31,034 cps        | 2.6 %         |
| 142Nd (KED) | 1.659 ppb             | 67,232 cps        | 0.7 %         |
| 152Sm (KED) | 0.239 ppb             | 9,190 cps         | 3.9 %         |
| 153Eu (KED) | 0.046 ppb             | 3,676 cps         | 3.7 %         |
| 158Gd (KED) | 0.199 ppb             | 11,086 cps        | 2.7 %         |
| 159Tb (KED) | 107.417 %             | 7,867,936 cps     | 1.6 %         |
| 164Dy (KED) | 0.142 ppb             | 8,981 cps         | 3.4 %         |
| 166Er (KED) | 0.065 ppb             | 5,689 cps         | 2.4 %         |
| 169Tm (KED) | 0.008 ppb             | 2,276 cps         | 1.2 %         |
| 174Yb (KED) | 0.054 ppb             | 5,158 cps         | 0.1 %         |
| 175Lu (KED) | -0.118 ppb            | 35,894 cps        | 1.4 %         |
| 205Tl (KED) | 0.023 ppb             | 3,957 cps         | 4.6 %         |
| 208Pb (KED) | 2.854 ppb             | 345,532 cps       | 0.8 %         |
| 209Bi (KED) | 89.959 %              | 6,528,299 cps     | 0.9 %         |
| 232Th (KED) | 0.479 ppb             | 117,490 cps       | 1.9 %         |
| 238U (KED)  | 0.117 ppb             | 33,797 cps        | 0.6 %         |

## Sample Summary

Instrument ID: iCAP Q

Analysis index: 21

Analysis name: 028731jian

Analysis started at: 9/26/2021 3:43:01 PM

User name: WINDOWS-UPCI4ER\Administrator

| Category    | Concentration average | Concentration RSD |
|-------------|-----------------------|-------------------|
| 6Li (KED)   | 119.428 %             | 2.1 %             |
| 9Be (KED)   | 0.057 ppb             | 50.7 %            |
| 11B (KED)   | -11.572 ppb           | 4.0 %             |
| 24Mg (KED)  | 725.960 ppb           | 1.6 %             |
| 27Al (KED)  | 497.528 ppb           | 1.6 %             |
| 45Sc (KED)  | 135.225 %             | 3.6 %             |
| 51V (KED)   | 1.025 ppb             | 1.3 %             |
| 52Cr (KED)  | 1.401 ppb             | 2.7 %             |
| 55Mn (KED)  | 15.414 ppb            | 2.5 %             |
| 56Fe (KED)  | 556.784 ppb           | 1.1 %             |
| 58Ni (KED)  | 2.753 ppb             | 2.1 %             |
| 59Co (KED)  | 0.276 ppb             | 2.4 %             |
| 63Cu (KED)  | 9.227 ppb             | 1.5 %             |
| 64Zn (KED)  | 162.200 ppb           | 0.7 %             |
| 69Ga (KED)  | 1.371 ppb             | 7.6 %             |
| 75As (KED)  | 0.695 ppb             | 8.0 %             |
| 80Se (KED)  | 0.779 ppb             | 28.5 %            |
| 85Rb (KED)  | 1.435 ppb             | 3.2 %             |
| 88Sr (KED)  | 7.143 ppb             | 1.0 %             |
| 89Y (KED)   | 117.545 %             | 0.7 %             |
| 107Ag (KED) | 0.111 ppb             | 2.7 %             |
| 114Cd (KED) | 0.038 ppb             | 3.8 %             |
| 115In (KED) | 105.511 %             | 1.5 %             |
| 133Cs (KED) | 0.107 ppb             | 2.7 %             |
| 138Ba (KED) | 4.870 ppb             | 3.0 %             |
| 139La (KED) | 0.443 ppb             | 2.7 %             |
| 140Ce (KED) | 0.936 ppb             | 3.6 %             |
| 141Pr (KED) | 0.101 ppb             | 2.6 %             |
| 142Nd (KED) | 0.569 ppb             | 2.2 %             |
| 152Sm (KED) | 0.072 ppb             | 4.7 %             |
| 153Eu (KED) | 0.014 ppb             | 2.0 %             |
| 158Gd (KED) | 0.061 ppb             | 1.7 %             |
| 159Tb (KED) | 100.456 %             | 4.6 %             |
| 164Dy (KED) | 0.042 ppb             | 1.4 %             |
| 166Er (KED) | 0.019 ppb             | 4.5 %             |
| 169Tm (KED) | 0.002 ppb             | 3.0 %             |
| 174Yb (KED) | 0.014 ppb             | 2.3 %             |
| 175Lu (KED) | -0.135 ppb            | 3.1 %             |
| 205Tl (KED) | 0.010 ppb             | 5.3 %             |
| 208Pb (KED) | 1.139 ppb             | 3.7 %             |
| 209Bi (KED) | 80.752 %              | 5.6 %             |
| 232Th (KED) | 0.188 ppb             | 1.5 %             |
| 238U (KED)  | 0.104 ppb             | 1.4 %             |

| Category   | Concentration average | Intensity average | Intensity RSD |
|------------|-----------------------|-------------------|---------------|
| 6Li (KED)  | 119.428 %             | 5,480 cps         | 2.1 %         |
| 9Be (KED)  | 0.057 ppb             | 7 cps             | 50.0 %        |
| 11B (KED)  | -11.572 ppb           | 637 cps           | 2.4 %         |
| 24Mg (KED) | 725.960 ppb           | 293,392 cps       | 2.5 %         |
| 27Al (KED) | 497.528 ppb           | 54,393 cps        | 2.4 %         |

| Category    | Concentration average | Intensity average | Intensity RSD |
|-------------|-----------------------|-------------------|---------------|
| 45Sc (KED)  | 135.225 %             | 77,611 cps        | 3.6 %         |
| 51V (KED)   | 1.025 ppb             | 6,872 cps         | 3.7 %         |
| 52Cr (KED)  | 1.401 ppb             | 14,850 cps        | 2.1 %         |
| 55Mn (KED)  | 15.414 ppb            | 80,093 cps        | 2.4 %         |
| 56Fe (KED)  | 556.784 ppb           | 5,294,914 cps     | 2.7 %         |
| 58Ni (KED)  | 2.753 ppb             | 36,840 cps        | 2.5 %         |
| 59Co (KED)  | 0.276 ppb             | 5,796 cps         | 3.0 %         |
| 63Cu (KED)  | 9.227 ppb             | 125,210 cps       | 2.2 %         |
| 64Zn (KED)  | 162.200 ppb           | 562,218 cps       | 0.7 %         |
| 69Ga (KED)  | 1.371 ppb             | 6,074 cps         | 8.0 %         |
| 75As (KED)  | 0.695 ppb             | 727 cps           | 8.5 %         |
| 80Se (KED)  | 0.779 ppb             | 1,108 cps         | 6.7 %         |
| 85Rb (KED)  | 1.435 ppb             | 6,209 cps         | 3.8 %         |
| 88Sr (KED)  | 7.143 ppb             | 43,975 cps        | 0.2 %         |
| 89Y (KED)   | 117.545 %             | 671,833 cps       | 0.7 %         |
| 107Ag (KED) | 0.111 ppb             | 4,660 cps         | 1.9 %         |
| 114Cd (KED) | 0.038 ppb             | 640 cps           | 3.9 %         |
| 115In (KED) | 105.511 %             | 1,242,794 cps     | 1.5 %         |
| 133Cs (KED) | 0.107 ppb             | 2,419 cps         | 1.9 %         |
| 138Ba (KED) | 4.870 ppb             | 153,663 cps       | 1.7 %         |
| 139La (KED) | 0.443 ppb             | 29,644 cps        | 4.0 %         |
| 140Ce (KED) | 0.936 ppb             | 83,673 cps        | 1.6 %         |
| 141Pr (KED) | 0.101 ppb             | 9,598 cps         | 2.1 %         |
| 142Nd (KED) | 0.569 ppb             | 21,591 cps        | 4.5 %         |
| 152Sm (KED) | 0.072 ppb             | 2,600 cps         | 1.7 %         |
| 153Eu (KED) | 0.014 ppb             | 1,052 cps         | 3.2 %         |
| 158Gd (KED) | 0.061 ppb             | 3,217 cps         | 6.0 %         |
| 159Tb (KED) | 100.456 %             | 7,358,091 cps     | 4.6 %         |
| 164Dy (KED) | 0.042 ppb             | 2,510 cps         | 5.6 %         |
| 166Er (KED) | 0.019 ppb             | 2,029 cps         | 5.2 %         |
| 169Tm (KED) | 0.002 ppb             | 582 cps           | 6.6 %         |
| 174Yb (KED) | 0.014 ppb             | 1,361 cps         | 3.9 %         |
| 175Lu (KED) | -0.135 ppb            | 31,238 cps        | 2.9 %         |
| 205Tl (KED) | 0.010 ppb             | 1,621 cps         | 10.3 %        |
| 208Pb (KED) | 1.139 ppb             | 131,192 cps       | 8.2 %         |
| 209Bi (KED) | 80.752 %              | 5,860,124 cps     | 5.6 %         |
| 232Th (KED) | 0.188 ppb             | 41,575 cps        | 7.1 %         |
| 238U (KED)  | 0.104 ppb             | 27,058 cps        | 6.4 %         |

## Sample Summary

Instrument ID: iCAP Q

Analysis index: 22

Analysis name: 18000061jian

Analysis started at: 9/26/2021 3:46:46 PM

User name: WINDOWS-UPCI4ER\Administrator

| Category    | Concentration average | Concentration RSD |
|-------------|-----------------------|-------------------|
| 6Li (KED)   | 115.358 %             | 2.2 %             |
| 9Be (KED)   | 0.020 ppb             | 173.2 %           |
| 11B (KED)   | -14.114 ppb           | 10.5 %            |
| 24Mg (KED)  | 550.317 ppb           | 3.0 %             |
| 27Al (KED)  | 269.189 ppb           | 1.6 %             |
| 45Sc (KED)  | 125.995 %             | 1.6 %             |
| 51V (KED)   | 0.539 ppb             | 1.7 %             |
| 52Cr (KED)  | 2.361 ppb             | 1.9 %             |
| 55Mn (KED)  | 8.691 ppb             | 0.9 %             |
| 56Fe (KED)  | 342.770 ppb           | 1.4 %             |
| 58Ni (KED)  | 1.752 ppb             | 0.5 %             |
| 59Co (KED)  | 0.739 ppb             | 137.1 %           |
| 63Cu (KED)  | 6.034 ppb             | 1.2 %             |
| 64Zn (KED)  | 176.512 ppb           | 1.2 %             |
| 69Ga (KED)  | 0.786 ppb             | 1.8 %             |
| 75As (KED)  | 0.561 ppb             | 3.4 %             |
| 80Se (KED)  | 0.535 ppb             | 25.9 %            |
| 85Rb (KED)  | 1.172 ppb             | 3.5 %             |
| 88Sr (KED)  | 5.160 ppb             | 0.4 %             |
| 89Y (KED)   | 116.609 %             | 2.0 %             |
| 107Ag (KED) | 0.104 ppb             | 1.5 %             |
| 114Cd (KED) | 0.036 ppb             | 9.5 %             |
| 115In (KED) | 107.093 %             | 0.4 %             |
| 133Cs (KED) | 0.059 ppb             | 6.5 %             |
| 138Ba (KED) | 2.966 ppb             | 3.3 %             |
| 139La (KED) | 0.222 ppb             | 2.6 %             |
| 140Ce (KED) | 0.473 ppb             | 3.7 %             |
| 141Pr (KED) | 0.054 ppb             | 2.2 %             |
| 142Nd (KED) | 0.287 ppb             | 4.2 %             |
| 152Sm (KED) | 0.038 ppb             | 3.8 %             |
| 153Eu (KED) | 0.006 ppb             | 4.3 %             |
| 158Gd (KED) | 0.032 ppb             | 4.9 %             |
| 159Tb (KED) | 107.036 %             | 2.4 %             |
| 164Dy (KED) | 0.023 ppb             | 2.5 %             |
| 166Er (KED) | 0.010 ppb             | 17.4 %            |
| 169Tm (KED) | 0.001 ppb             | 18.5 %            |
| 174Yb (KED) | 0.009 ppb             | 4.4 %             |
| 175Lu (KED) | -0.132 ppb            | 5.9 %             |
| 205Tl (KED) | 0.006 ppb             | 5.1 %             |
| 208Pb (KED) | 0.783 ppb             | 1.8 %             |
| 209Bi (KED) | 89.111 %              | 1.4 %             |
| 232Th (KED) | 0.084 ppb             | 1.4 %             |
| 238U (KED)  | 0.048 ppb             | 1.1 %             |

| Category   | Concentration average | Intensity average | Intensity RSD |
|------------|-----------------------|-------------------|---------------|
| 6Li (KED)  | 115.358 %             | 5,293 cps         | 2.2 %         |
| 9Be (KED)  | 0.020 ppb             | 2 cps             | 173.2 %       |
| 11B (KED)  | -14.114 ppb           | 480 cps           | 14.5 %        |
| 24Mg (KED) | 550.317 ppb           | 214,799 cps       | 1.5 %         |
| 27Al (KED) | 269.189 ppb           | 27,460 cps        | 0.5 %         |

| Category    | Concentration average | Intensity average | Intensity RSD |
|-------------|-----------------------|-------------------|---------------|
| 45Sc (KED)  | 125.995 %             | 72,313 cps        | 1.6 %         |
| 51V (KED)   | 0.539 ppb             | 3,370 cps         | 1.7 %         |
| 52Cr (KED)  | 2.361 ppb             | 23,269 cps        | 2.8 %         |
| 55Mn (KED)  | 8.691 ppb             | 42,134 cps        | 1.1 %         |
| 56Fe (KED)  | 342.770 ppb           | 3,038,536 cps     | 0.8 %         |
| 58Ni (KED)  | 1.752 ppb             | 22,772 cps        | 1.1 %         |
| 59Co (KED)  | 0.739 ppb             | 14,188 cps        | 135.9 %       |
| 63Cu (KED)  | 6.034 ppb             | 81,478 cps        | 1.6 %         |
| 64Zn (KED)  | 176.512 ppb           | 606,598 cps       | 0.8 %         |
| 69Ga (KED)  | 0.786 ppb             | 3,477 cps         | 2.4 %         |
| 75As (KED)  | 0.561 ppb             | 586 cps           | 5.1 %         |
| 80Se (KED)  | 0.535 ppb             | 1,026 cps         | 3.3 %         |
| 85Rb (KED)  | 1.172 ppb             | 5,033 cps         | 1.6 %         |
| 88Sr (KED)  | 5.160 ppb             | 31,549 cps        | 2.2 %         |
| 89Y (KED)   | 116.609 %             | 666,480 cps       | 2.0 %         |
| 107Ag (KED) | 0.104 ppb             | 4,437 cps         | 1.5 %         |
| 114Cd (KED) | 0.036 ppb             | 614 cps           | 8.8 %         |
| 115In (KED) | 107.093 %             | 1,261,430 cps     | 0.4 %         |
| 133Cs (KED) | 0.059 ppb             | 1,367 cps         | 6.1 %         |
| 138Ba (KED) | 2.966 ppb             | 100,168 cps       | 1.0 %         |
| 139La (KED) | 0.222 ppb             | 15,849 cps        | 0.3 %         |
| 140Ce (KED) | 0.473 ppb             | 45,211 cps        | 2.5 %         |
| 141Pr (KED) | 0.054 ppb             | 5,468 cps         | 0.9 %         |
| 142Nd (KED) | 0.287 ppb             | 11,631 cps        | 2.4 %         |
| 152Sm (KED) | 0.038 ppb             | 1,465 cps         | 5.4 %         |
| 153Eu (KED) | 0.006 ppb             | 540 cps           | 4.7 %         |
| 158Gd (KED) | 0.032 ppb             | 1,826 cps         | 2.4 %         |
| 159Tb (KED) | 107.036 %             | 7,840,055 cps     | 2.4 %         |
| 164Dy (KED) | 0.023 ppb             | 1,463 cps         | 2.5 %         |
| 166Er (KED) | 0.010 ppb             | 1,468 cps         | 7.8 %         |
| 169Tm (KED) | 0.001 ppb             | 362 cps           | 7.7 %         |
| 174Yb (KED) | 0.009 ppb             | 901 cps           | 4.8 %         |
| 175Lu (KED) | -0.132 ppb            | 33,699 cps        | 2.0 %         |
| 205Tl (KED) | 0.006 ppb             | 1,044 cps         | 5.9 %         |
| 208Pb (KED) | 0.783 ppb             | 103,533 cps       | 0.9 %         |
| 209Bi (KED) | 89.111 %              | 6,466,724 cps     | 1.4 %         |
| 232Th (KED) | 0.084 ppb             | 20,567 cps        | 2.4 %         |
| 238U (KED)  | 0.048 ppb             | 13,906 cps        | 1.2 %         |

## Sample Summary

Instrument ID: iCAP Q

Analysis index: 23

Analysis name: 048618(18-107)jian

Analysis started at: 9/26/2021 3:50:10 PM

User name: WINDOWS-UPCI4ER\Administrator

| Category    | Concentration average | Concentration RSD |
|-------------|-----------------------|-------------------|
| 6Li (KED)   | 113.783 %             | 2.9 %             |
| 9Be (KED)   | 0.080 ppb             | 78.9 %            |
| 11B (KED)   | -13.584 ppb           | 7.4 %             |
| 24Mg (KED)  | 1,572.037 ppb         | 1.4 %             |
| 27Al (KED)  | 1,884.634 ppb         | 1.6 %             |
| 45Sc (KED)  | 126.974 %             | 0.6 %             |
| 51V (KED)   | 3.365 ppb             | 1.6 %             |
| 52Cr (KED)  | 4.026 ppb             | 1.3 %             |
| 55Mn (KED)  | 47.997 ppb            | 0.6 %             |
| 56Fe (KED)  | 2,057.111 ppb         | 0.3 %             |
| 58Ni (KED)  | 8.443 ppb             | 0.1 %             |
| 59Co (KED)  | 0.910 ppb             | 0.6 %             |
| 63Cu (KED)  | 10.966 ppb            | 1.2 %             |
| 64Zn (KED)  | 144.144 ppb           | 1.1 %             |
| 69Ga (KED)  | 3.631 ppb             | 1.1 %             |
| 75As (KED)  | 1.172 ppb             | 6.0 %             |
| 80Se (KED)  | 0.450 ppb             | 59.0 %            |
| 85Rb (KED)  | 4.057 ppb             | 1.8 %             |
| 88Sr (KED)  | 26.383 ppb            | 1.0 %             |
| 89Y (KED)   | 116.437 %             | 1.7 %             |
| 107Ag (KED) | 0.060 ppb             | 1.7 %             |
| 114Cd (KED) | 0.054 ppb             | 6.7 %             |
| 115In (KED) | 105.449 %             | 1.5 %             |
| 133Cs (KED) | 0.408 ppb             | 0.7 %             |
| 138Ba (KED) | 13.356 ppb            | 1.5 %             |
| 139La (KED) | 1.665 ppb             | 1.7 %             |
| 140Ce (KED) | 3.546 ppb             | 1.4 %             |
| 141Pr (KED) | 0.409 ppb             | 1.9 %             |
| 142Nd (KED) | 2.214 ppb             | 2.7 %             |
| 152Sm (KED) | 0.317 ppb             | 0.5 %             |
| 153Eu (KED) | 0.060 ppb             | 2.0 %             |
| 158Gd (KED) | 0.274 ppb             | 1.5 %             |
| 159Tb (KED) | 105.671 %             | 1.3 %             |
| 164Dy (KED) | 0.187 ppb             | 3.2 %             |
| 166Er (KED) | 0.082 ppb             | 5.6 %             |
| 169Tm (KED) | 0.011 ppb             | 1.5 %             |
| 174Yb (KED) | 0.069 ppb             | 0.9 %             |
| 175Lu (KED) | -0.118 ppb            | 5.5 %             |
| 205Tl (KED) | 0.027 ppb             | 6.1 %             |
| 208Pb (KED) | 2.448 ppb             | 1.6 %             |
| 209Bi (KED) | 87.329 %              | 0.5 %             |
| 232Th (KED) | 0.758 ppb             | 1.5 %             |
| 238U (KED)  | 0.177 ppb             | 2.6 %             |

| Category   | Concentration average | Intensity average | Intensity RSD |
|------------|-----------------------|-------------------|---------------|
| 6Li (KED)  | 113.783 %             | 5,221 cps         | 2.9 %         |
| 9Be (KED)  | 0.080 ppb             | 9 cps             | 78.1 %        |
| 11B (KED)  | -13.584 ppb           | 501 cps           | 7.7 %         |
| 24Mg (KED) | 1,572.037 ppb         | 604,925 cps       | 1.8 %         |
| 27Al (KED) | 1,884.634 ppb         | 193,335 cps       | 2.0 %         |

| Category    | Concentration average | Intensity average | Intensity RSD |
|-------------|-----------------------|-------------------|---------------|
| 45Sc (KED)  | 126.974 %             | 72,875 cps        | 0.6 %         |
| 51V (KED)   | 3.365 ppb             | 21,176 cps        | 1.5 %         |
| 52Cr (KED)  | 4.026 ppb             | 39,916 cps        | 1.9 %         |
| 55Mn (KED)  | 47.997 ppb            | 234,074 cps       | 0.7 %         |
| 56Fe (KED)  | 2,057.111 ppb         | 18,366,504 cps    | 0.4 %         |
| 58Ni (KED)  | 8.443 ppb             | 100,859 cps       | 0.5 %         |
| 59Co (KED)  | 0.910 ppb             | 17,815 cps        | 0.4 %         |
| 63Cu (KED)  | 10.966 ppb            | 147,240 cps       | 1.1 %         |
| 64Zn (KED)  | 144.144 ppb           | 495,255 cps       | 1.7 %         |
| 69Ga (KED)  | 3.631 ppb             | 15,850 cps        | 2.6 %         |
| 75As (KED)  | 1.172 ppb             | 1,200 cps         | 6.5 %         |
| 80Se (KED)  | 0.450 ppb             | 999 cps           | 7.5 %         |
| 85Rb (KED)  | 4.057 ppb             | 17,347 cps        | 0.9 %         |
| 88Sr (KED)  | 26.383 ppb            | 160,570 cps       | 1.3 %         |
| 89Y (KED)   | 116.437 %             | 665,497 cps       | 1.7 %         |
| 107Ag (KED) | 0.060 ppb             | 2,590 cps         | 3.0 %         |
| 114Cd (KED) | 0.054 ppb             | 877 cps           | 6.3 %         |
| 115In (KED) | 105.449 %             | 1,242,065 cps     | 1.5 %         |
| 133Cs (KED) | 0.408 ppb             | 9,129 cps         | 1.9 %         |
| 138Ba (KED) | 13.356 ppb            | 441,824 cps       | 0.2 %         |
| 139La (KED) | 1.665 ppb             | 117,051 cps       | 0.4 %         |
| 140Ce (KED) | 3.546 ppb             | 333,411 cps       | 0.7 %         |
| 141Pr (KED) | 0.409 ppb             | 40,649 cps        | 2.7 %         |
| 142Nd (KED) | 2.214 ppb             | 88,241 cps        | 1.5 %         |
| 152Sm (KED) | 0.317 ppb             | 11,999 cps        | 1.5 %         |
| 153Eu (KED) | 0.060 ppb             | 4,706 cps         | 1.1 %         |
| 158Gd (KED) | 0.274 ppb             | 14,998 cps        | 1.5 %         |
| 159Tb (KED) | 105.671 %             | 7,740,031 cps     | 1.3 %         |
| 164Dy (KED) | 0.187 ppb             | 11,566 cps        | 1.9 %         |
| 166Er (KED) | 0.082 ppb             | 6,833 cps         | 3.9 %         |
| 169Tm (KED) | 0.011 ppb             | 2,991 cps         | 1.6 %         |
| 174Yb (KED) | 0.069 ppb             | 6,501 cps         | 2.1 %         |
| 175Lu (KED) | -0.118 ppb            | 35,414 cps        | 2.4 %         |
| 205Tl (KED) | 0.027 ppb             | 4,424 cps         | 5.6 %         |
| 208Pb (KED) | 2.448 ppb             | 289,504 cps       | 1.3 %         |
| 209Bi (KED) | 87.329 %              | 6,337,429 cps     | 0.5 %         |
| 232Th (KED) | 0.758 ppb             | 180,126 cps       | 1.1 %         |
| 238U (KED)  | 0.177 ppb             | 49,750 cps        | 2.8 %         |

## Sample Summary

Instrument ID: iCAP Q

Analysis index: 24

Analysis name: 00013(99)jian

Analysis started at: 9/26/2021 3:53:29 PM

User name: WINDOWS-UPCI4ER\Administrator

| Category    | Concentration average | Concentration RSD |
|-------------|-----------------------|-------------------|
| 6Li (KED)   | 119.283 %             | 1.6 %             |
| 9Be (KED)   | 0.047 ppb             | 33.6 %            |
| 11B (KED)   | -13.955 ppb           | 7.4 %             |
| 24Mg (KED)  | 1,326.056 ppb         | 1.0 %             |
| 27Al (KED)  | 1,338.740 ppb         | 0.5 %             |
| 45Sc (KED)  | 134.040 %             | 1.2 %             |
| 51V (KED)   | 2.398 ppb             | 1.3 %             |
| 52Cr (KED)  | 4.252 ppb             | 0.2 %             |
| 55Mn (KED)  | 34.020 ppb            | 1.2 %             |
| 56Fe (KED)  | 1,449.754 ppb         | 1.1 %             |
| 58Ni (KED)  | 6.012 ppb             | 0.9 %             |
| 59Co (KED)  | 0.645 ppb             | 1.7 %             |
| 63Cu (KED)  | 11.830 ppb            | 2.1 %             |
| 64Zn (KED)  | 152.883 ppb           | 1.0 %             |
| 69Ga (KED)  | 2.560 ppb             | 1.5 %             |
| 75As (KED)  | 0.770 ppb             | 6.4 %             |
| 80Se (KED)  | 0.350 ppb             | 64.7 %            |
| 85Rb (KED)  | 3.668 ppb             | 1.8 %             |
| 88Sr (KED)  | 20.278 ppb            | 0.8 %             |
| 89Y (KED)   | 122.506 %             | 1.3 %             |
| 107Ag (KED) | 0.057 ppb             | 3.5 %             |
| 114Cd (KED) | 0.064 ppb             | 2.3 %             |
| 115In (KED) | 108.626 %             | 1.6 %             |
| 133Cs (KED) | 0.294 ppb             | 1.1 %             |
| 138Ba (KED) | 9.409 ppb             | 0.9 %             |
| 139La (KED) | 1.089 ppb             | 1.3 %             |
| 140Ce (KED) | 2.294 ppb             | 3.5 %             |
| 141Pr (KED) | 0.270 ppb             | 1.9 %             |
| 142Nd (KED) | 1.444 ppb             | 1.5 %             |
| 152Sm (KED) | 0.207 ppb             | 2.0 %             |
| 153Eu (KED) | 0.039 ppb             | 6.6 %             |
| 158Gd (KED) | 0.171 ppb             | 0.4 %             |
| 159Tb (KED) | 109.320 %             | 1.4 %             |
| 164Dy (KED) | 0.125 ppb             | 0.9 %             |
| 166Er (KED) | 0.055 ppb             | 0.5 %             |
| 169Tm (KED) | 0.007 ppb             | 5.2 %             |
| 174Yb (KED) | 0.045 ppb             | 6.4 %             |
| 175Lu (KED) | -0.120 ppb            | 5.0 %             |
| 205Tl (KED) | 0.022 ppb             | 1.2 %             |
| 208Pb (KED) | 1.595 ppb             | 2.3 %             |
| 209Bi (KED) | 89.699 %              | 2.0 %             |
| 232Th (KED) | 0.534 ppb             | 2.9 %             |
| 238U (KED)  | 0.122 ppb             | 1.6 %             |

| Category   | Concentration average | Intensity average | Intensity RSD |
|------------|-----------------------|-------------------|---------------|
| 6Li (KED)  | 119.283 %             | 5,473 cps         | 1.6 %         |
| 9Be (KED)  | 0.047 ppb             | 6 cps             | 34.6 %        |
| 11B (KED)  | -13.955 ppb           | 506 cps           | 9.7 %         |
| 24Mg (KED) | 1,326.056 ppb         | 535,033 cps       | 0.6 %         |
| 27Al (KED) | 1,338.740 ppb         | 144,993 cps       | 1.2 %         |

| Category    | Concentration average | Intensity average | Intensity RSD |
|-------------|-----------------------|-------------------|---------------|
| 45Sc (KED)  | 134.040 %             | 76,931 cps        | 1.2 %         |
| 51V (KED)   | 2.398 ppb             | 15,929 cps        | 0.8 %         |
| 52Cr (KED)  | 4.252 ppb             | 44,493 cps        | 1.0 %         |
| 55Mn (KED)  | 34.020 ppb            | 175,180 cps       | 1.9 %         |
| 56Fe (KED)  | 1,449.754 ppb         | 13,666,065 cps    | 2.2 %         |
| 58Ni (KED)  | 6.012 ppb             | 76,602 cps        | 1.7 %         |
| 59Co (KED)  | 0.645 ppb             | 13,340 cps        | 2.0 %         |
| 63Cu (KED)  | 11.830 ppb            | 167,084 cps       | 2.9 %         |
| 64Zn (KED)  | 152.883 ppb           | 552,503 cps       | 1.9 %         |
| 69Ga (KED)  | 2.560 ppb             | 11,772 cps        | 1.1 %         |
| 75As (KED)  | 0.770 ppb             | 837 cps           | 7.6 %         |
| 80Se (KED)  | 0.350 ppb             | 1,020 cps         | 7.1 %         |
| 85Rb (KED)  | 3.668 ppb             | 16,503 cps        | 1.3 %         |
| 88Sr (KED)  | 20.278 ppb            | 129,887 cps       | 1.4 %         |
| 89Y (KED)   | 122.506 %             | 700,186 cps       | 1.3 %         |
| 107Ag (KED) | 0.057 ppb             | 2,570 cps         | 1.6 %         |
| 114Cd (KED) | 0.064 ppb             | 1,052 cps         | 1.8 %         |
| 115In (KED) | 108.626 %             | 1,279,487 cps     | 1.6 %         |
| 133Cs (KED) | 0.294 ppb             | 6,784 cps         | 2.7 %         |
| 138Ba (KED) | 9.409 ppb             | 322,321 cps       | 0.5 %         |
| 139La (KED) | 1.089 ppb             | 79,231 cps        | 0.4 %         |
| 140Ce (KED) | 2.294 ppb             | 223,106 cps       | 2.2 %         |
| 141Pr (KED) | 0.270 ppb             | 27,754 cps        | 2.5 %         |
| 142Nd (KED) | 1.444 ppb             | 59,580 cps        | 0.6 %         |
| 152Sm (KED) | 0.207 ppb             | 8,127 cps         | 3.2 %         |
| 153Eu (KED) | 0.039 ppb             | 3,147 cps         | 6.9 %         |
| 158Gd (KED) | 0.171 ppb             | 9,697 cps         | 1.8 %         |
| 159Tb (KED) | 109.320 %             | 8,007,308 cps     | 1.4 %         |
| 164Dy (KED) | 0.125 ppb             | 8,006 cps         | 2.1 %         |
| 166Er (KED) | 0.055 ppb             | 5,007 cps         | 1.7 %         |
| 169Tm (KED) | 0.007 ppb             | 2,031 cps         | 6.0 %         |
| 174Yb (KED) | 0.045 ppb             | 4,412 cps         | 5.5 %         |
| 175Lu (KED) | -0.120 ppb            | 36,226 cps        | 3.6 %         |
| 205Tl (KED) | 0.022 ppb             | 3,675 cps         | 2.9 %         |
| 208Pb (KED) | 1.595 ppb             | 198,388 cps       | 1.6 %         |
| 209Bi (KED) | 89.699 %              | 6,509,365 cps     | 2.0 %         |
| 232Th (KED) | 0.534 ppb             | 130,332 cps       | 0.9 %         |
| 238U (KED)  | 0.122 ppb             | 35,154 cps        | 3.1 %         |

## Sample Summary

Instrument ID: iCAP Q

Analysis index: 25

Analysis name: 038431(18-133)jian

Analysis started at: 9/26/2021 3:56:51 PM

User name: WINDOWS-UPCI4ER\Administrator

| Category    | Concentration average | Concentration RSD |
|-------------|-----------------------|-------------------|
| 6Li (KED)   | 129.166 %             | 2.4 %             |
| 9Be (KED)   | 0.061 ppb             | 63.1 %            |
| 11B (KED)   | -9.164 ppb            | 4.1 %             |
| 24Mg (KED)  | 1,930.896 ppb         | 3.3 %             |
| 27Al (KED)  | 2,176.054 ppb         | 2.5 %             |
| 45Sc (KED)  | 143.793 %             | 0.9 %             |
| 51V (KED)   | 3.957 ppb             | 0.1 %             |
| 52Cr (KED)  | 4.482 ppb             | 2.0 %             |
| 55Mn (KED)  | 55.808 ppb            | 1.4 %             |
| 56Fe (KED)  | 2,318.767 ppb         | 1.3 %             |
| 58Ni (KED)  | 9.657 ppb             | 1.9 %             |
| 59Co (KED)  | 1.038 ppb             | 1.4 %             |
| 63Cu (KED)  | 11.911 ppb            | 0.9 %             |
| 64Zn (KED)  | 147.876 ppb           | 0.8 %             |
| 69Ga (KED)  | 4.509 ppb             | 0.4 %             |
| 75As (KED)  | 1.337 ppb             | 3.7 %             |
| 80Se (KED)  | 0.774 ppb             | 11.3 %            |
| 85Rb (KED)  | 5.377 ppb             | 3.4 %             |
| 88Sr (KED)  | 31.717 ppb            | 0.4 %             |
| 89Y (KED)   | 126.775 %             | 2.6 %             |
| 107Ag (KED) | 0.061 ppb             | 3.5 %             |
| 114Cd (KED) | 0.087 ppb             | 6.5 %             |
| 115In (KED) | 109.305 %             | 1.5 %             |
| 133Cs (KED) | 0.471 ppb             | 1.4 %             |
| 138Ba (KED) | 16.137 ppb            | 1.9 %             |
| 139La (KED) | 1.896 ppb             | 2.7 %             |
| 140Ce (KED) | 3.964 ppb             | 1.5 %             |
| 141Pr (KED) | 0.464 ppb             | 2.5 %             |
| 142Nd (KED) | 2.510 ppb             | 1.5 %             |
| 152Sm (KED) | 0.352 ppb             | 2.7 %             |
| 153Eu (KED) | 0.066 ppb             | 2.8 %             |
| 158Gd (KED) | 0.295 ppb             | 2.6 %             |
| 159Tb (KED) | 109.934 %             | 1.5 %             |
| 164Dy (KED) | 0.211 ppb             | 2.4 %             |
| 166Er (KED) | 0.094 ppb             | 3.2 %             |
| 169Tm (KED) | 0.012 ppb             | 5.7 %             |
| 174Yb (KED) | 0.079 ppb             | 3.7 %             |
| 175Lu (KED) | -0.118 ppb            | 2.7 %             |
| 205Tl (KED) | 0.032 ppb             | 0.8 %             |
| 208Pb (KED) | 2.333 ppb             | 0.7 %             |
| 209Bi (KED) | 87.017 %              | 0.7 %             |
| 232Th (KED) | 0.809 ppb             | 1.3 %             |
| 238U (KED)  | 0.195 ppb             | 2.3 %             |

| Category   | Concentration average | Intensity average | Intensity RSD |
|------------|-----------------------|-------------------|---------------|
| 6Li (KED)  | 129.166 %             | 5,927 cps         | 2.4 %         |
| 9Be (KED)  | 0.061 ppb             | 8 cps             | 65.5 %        |
| 11B (KED)  | -9.164 ppb            | 831 cps           | 2.5 %         |
| 24Mg (KED) | 1,930.896 ppb         | 843,274 cps       | 2.2 %         |
| 27Al (KED) | 2,176.054 ppb         | 252,780 cps       | 2.8 %         |

| Category    | Concentration average | Intensity average | Intensity RSD |
|-------------|-----------------------|-------------------|---------------|
| 45Sc (KED)  | 143.793 %             | 82,529 cps        | 0.9 %         |
| 51V (KED)   | 3.957 ppb             | 28,197 cps        | 0.8 %         |
| 52Cr (KED)  | 4.482 ppb             | 50,309 cps        | 2.6 %         |
| 55Mn (KED)  | 55.808 ppb            | 308,221 cps       | 2.2 %         |
| 56Fe (KED)  | 2,318.767 ppb         | 23,444,945 cps    | 1.7 %         |
| 58Ni (KED)  | 9.657 ppb             | 130,232 cps       | 2.1 %         |
| 59Co (KED)  | 1.038 ppb             | 23,006 cps        | 1.7 %         |
| 63Cu (KED)  | 11.911 ppb            | 174,039 cps       | 1.7 %         |
| 64Zn (KED)  | 147.876 ppb           | 553,051 cps       | 2.0 %         |
| 69Ga (KED)  | 4.509 ppb             | 21,420 cps        | 2.8 %         |
| 75As (KED)  | 1.337 ppb             | 1,488 cps         | 6.0 %         |
| 80Se (KED)  | 0.774 ppb             | 1,192 cps         | 1.3 %         |
| 85Rb (KED)  | 5.377 ppb             | 25,011 cps        | 0.8 %         |
| 88Sr (KED)  | 31.717 ppb            | 210,182 cps       | 3.1 %         |
| 89Y (KED)   | 126.775 %             | 724,587 cps       | 2.6 %         |
| 107Ag (KED) | 0.061 ppb             | 2,760 cps         | 2.2 %         |
| 114Cd (KED) | 0.087 ppb             | 1,412 cps         | 4.6 %         |
| 115In (KED) | 109.305 %             | 1,287,485 cps     | 1.5 %         |
| 133Cs (KED) | 0.471 ppb             | 10,921 cps        | 2.7 %         |
| 138Ba (KED) | 16.137 ppb            | 555,124 cps       | 1.0 %         |
| 139La (KED) | 1.896 ppb             | 138,597 cps       | 1.5 %         |
| 140Ce (KED) | 3.964 ppb             | 387,760 cps       | 1.9 %         |
| 141Pr (KED) | 0.464 ppb             | 47,959 cps        | 1.4 %         |
| 142Nd (KED) | 2.510 ppb             | 104,075 cps       | 1.1 %         |
| 152Sm (KED) | 0.352 ppb             | 13,843 cps        | 1.9 %         |
| 153Eu (KED) | 0.066 ppb             | 5,406 cps         | 2.6 %         |
| 158Gd (KED) | 0.295 ppb             | 16,780 cps        | 2.0 %         |
| 159Tb (KED) | 109.934 %             | 8,052,296 cps     | 1.5 %         |
| 164Dy (KED) | 0.211 ppb             | 13,584 cps        | 1.5 %         |
| 166Er (KED) | 0.094 ppb             | 8,054 cps         | 1.7 %         |
| 169Tm (KED) | 0.012 ppb             | 3,326 cps         | 4.1 %         |
| 174Yb (KED) | 0.079 ppb             | 7,696 cps         | 2.3 %         |
| 175Lu (KED) | -0.118 ppb            | 36,838 cps        | 2.3 %         |
| 205Tl (KED) | 0.032 ppb             | 5,221 cps         | 1.0 %         |
| 208Pb (KED) | 2.333 ppb             | 275,569 cps       | 0.7 %         |
| 209Bi (KED) | 87.017 %              | 6,314,796 cps     | 0.7 %         |
| 232Th (KED) | 0.809 ppb             | 191,571 cps       | 1.4 %         |
| 238U (KED)  | 0.195 ppb             | 54,536 cps        | 2.4 %         |

## Sample Summary

Instrument ID: iCAP Q

Analysis index: 26

Analysis name: 032370(0003)jian

Analysis started at: 9/26/2021 4:00:17 PM

User name: WINDOWS-UPCI4ER\Administrator

| Category    | Concentration average | Concentration RSD |
|-------------|-----------------------|-------------------|
| 6Li (KED)   | 126.211 %             |                   |
| 9Be (KED)   | 0.134 ppb             |                   |
| 11B (KED)   | -14.801 ppb           |                   |
| 24Mg (KED)  | 1,468.930 ppb         |                   |
| 27Al (KED)  | 1,526.710 ppb         |                   |
| 45Sc (KED)  | 142.759 %             |                   |
| 51V (KED)   | 2.662 ppb             |                   |
| 52Cr (KED)  | 3.009 ppb             |                   |
| 55Mn (KED)  | 38.080 ppb            |                   |
| 56Fe (KED)  | 1,633.265 ppb         |                   |
| 58Ni (KED)  | 6.729 ppb             |                   |
| 59Co (KED)  | 0.704 ppb             |                   |
| 63Cu (KED)  | 12.917 ppb            |                   |
| 64Zn (KED)  | 157.324 ppb           |                   |
| 69Ga (KED)  | 3.145 ppb             |                   |
| 75As (KED)  | 0.823 ppb             |                   |
| 80Se (KED)  | 0.700 ppb             |                   |
| 85Rb (KED)  | 3.435 ppb             |                   |
| 88Sr (KED)  | 26.114 ppb            |                   |
| 89Y (KED)   | 125.448 %             |                   |
| 107Ag (KED) | 0.048 ppb             |                   |
| 114Cd (KED) | 0.077 ppb             |                   |
| 115In (KED) | 109.709 %             |                   |
| 133Cs (KED) | 0.322 ppb             |                   |
| 138Ba (KED) | 10.926 ppb            |                   |
| 139La (KED) | 1.285 ppb             |                   |
| 140Ce (KED) | 2.688 ppb             |                   |
| 141Pr (KED) | 0.320 ppb             |                   |
| 142Nd (KED) | 1.690 ppb             |                   |
| 152Sm (KED) | 0.240 ppb             |                   |
| 153Eu (KED) | 0.047 ppb             |                   |
| 158Gd (KED) | 0.199 ppb             |                   |
| 159Tb (KED) | 107.923 %             |                   |
| 164Dy (KED) | 0.142 ppb             |                   |
| 166Er (KED) | 0.064 ppb             |                   |
| 169Tm (KED) | 0.009 ppb             |                   |
| 174Yb (KED) | 0.053 ppb             |                   |
| 175Lu (KED) | -0.124 ppb            |                   |
| 205Tl (KED) | 0.026 ppb             |                   |
| 208Pb (KED) | 1.886 ppb             |                   |
| 209Bi (KED) | 85.998 %              |                   |
| 232Th (KED) | 0.549 ppb             |                   |
| 238U (KED)  | 0.134 ppb             |                   |

| Category   | Concentration average | Intensity average | Intensity RSD |
|------------|-----------------------|-------------------|---------------|
| 6Li (KED)  | 126.211 %             | 5,791 cps         |               |
| 9Be (KED)  | 0.134 ppb             | 17 cps            |               |
| 11B (KED)  | -14.801 ppb           | 487 cps           |               |
| 24Mg (KED) | 1,468.930 ppb         | 627,141 cps       |               |
| 27Al (KED) | 1,526.710 ppb         | 176,096 cps       |               |

| Category    | Concentration average | Intensity average | Intensity RSD |
|-------------|-----------------------|-------------------|---------------|
| 45Sc (KED)  | 142.759 %             | 81,935 cps        |               |
| 51V (KED)   | 2.662 ppb             | 18,838 cps        |               |
| 52Cr (KED)  | 3.009 ppb             | 33,568 cps        |               |
| 55Mn (KED)  | 38.080 ppb            | 208,819 cps       |               |
| 56Fe (KED)  | 1,633.265 ppb         | 16,395,845 cps    |               |
| 58Ni (KED)  | 6.729 ppb             | 90,960 cps        |               |
| 59Co (KED)  | 0.704 ppb             | 15,510 cps        |               |
| 63Cu (KED)  | 12.917 ppb            | 186,728 cps       |               |
| 64Zn (KED)  | 157.324 ppb           | 582,090 cps       |               |
| 69Ga (KED)  | 3.145 ppb             | 14,799 cps        |               |
| 75As (KED)  | 0.823 ppb             | 913 cps           |               |
| 80Se (KED)  | 0.700 ppb             | 1,157 cps         |               |
| 85Rb (KED)  | 3.435 ppb             | 15,830 cps        |               |
| 88Sr (KED)  | 26.114 ppb            | 171,245 cps       |               |
| 89Y (KED)   | 125.448 %             | 717,002 cps       |               |
| 107Ag (KED) | 0.048 ppb             | 2,227 cps         |               |
| 114Cd (KED) | 0.077 ppb             | 1,263 cps         |               |
| 115In (KED) | 109.709 %             | 1,292,250 cps     |               |
| 133Cs (KED) | 0.322 ppb             | 7,496 cps         |               |
| 138Ba (KED) | 10.926 ppb            | 369,364 cps       |               |
| 139La (KED) | 1.285 ppb             | 92,287 cps        |               |
| 140Ce (KED) | 2.688 ppb             | 258,145 cps       |               |
| 141Pr (KED) | 0.320 ppb             | 32,442 cps        |               |
| 142Nd (KED) | 1.690 ppb             | 68,823 cps        |               |
| 152Sm (KED) | 0.240 ppb             | 9,267 cps         |               |
| 153Eu (KED) | 0.047 ppb             | 3,804 cps         |               |
| 158Gd (KED) | 0.199 ppb             | 11,112 cps        |               |
| 159Tb (KED) | 107.923 %             | 7,904,969 cps     |               |
| 164Dy (KED) | 0.142 ppb             | 8,997 cps         |               |
| 166Er (KED) | 0.064 ppb             | 5,601 cps         |               |
| 169Tm (KED) | 0.009 ppb             | 2,370 cps         |               |
| 174Yb (KED) | 0.053 ppb             | 5,134 cps         |               |
| 175Lu (KED) | -0.124 ppb            | 35,250 cps        |               |
| 205Tl (KED) | 0.026 ppb             | 4,267 cps         |               |
| 208Pb (KED) | 1.886 ppb             | 222,688 cps       |               |
| 209Bi (KED) | 85.998 %              | 6,240,810 cps     |               |
| 232Th (KED) | 0.549 ppb             | 128,545 cps       |               |
| 238U (KED)  | 0.134 ppb             | 37,175 cps        |               |

## Sample Summary

Instrument ID: iCAP Q

Analysis index: 27

Analysis name: 00017(07)jian

Analysis started at: 9/26/2021 4:02:22 PM

User name: WINDOWS-UPCI4ER\Administrator

| Category    | Concentration average | Concentration RSD |
|-------------|-----------------------|-------------------|
| 6Li (KED)   | 128.973 %             |                   |
| 9Be (KED)   | 0.105 ppb             |                   |
| 11B (KED)   | -15.094 ppb           |                   |
| 24Mg (KED)  | 857.402 ppb           |                   |
| 27Al (KED)  | 938.165 ppb           |                   |
| 45Sc (KED)  | 145.372 %             |                   |
| 51V (KED)   | 1.609 ppb             |                   |
| 52Cr (KED)  | 3.925 ppb             |                   |
| 55Mn (KED)  | 23.822 ppb            |                   |
| 56Fe (KED)  | 1,143.966 ppb         |                   |
| 58Ni (KED)  | 4.641 ppb             |                   |
| 59Co (KED)  | 0.443 ppb             |                   |
| 63Cu (KED)  | 9.333 ppb             |                   |
| 64Zn (KED)  | 156.941 ppb           |                   |
| 69Ga (KED)  | 1.948 ppb             |                   |
| 75As (KED)  | 0.716 ppb             |                   |
| 80Se (KED)  | 0.570 ppb             |                   |
| 85Rb (KED)  | 5.771 ppb             |                   |
| 88Sr (KED)  | 11.950 ppb            |                   |
| 89Y (KED)   | 126.392 %             |                   |
| 107Ag (KED) | 0.043 ppb             |                   |
| 114Cd (KED) | 0.057 ppb             |                   |
| 115In (KED) | 110.307 %             |                   |
| 133Cs (KED) | 0.193 ppb             |                   |
| 138Ba (KED) | 6.919 ppb             |                   |
| 139La (KED) | 0.778 ppb             |                   |
| 140Ce (KED) | 1.653 ppb             |                   |
| 141Pr (KED) | 0.192 ppb             |                   |
| 142Nd (KED) | 1.042 ppb             |                   |
| 152Sm (KED) | 0.139 ppb             |                   |
| 153Eu (KED) | 0.029 ppb             |                   |
| 158Gd (KED) | 0.130 ppb             |                   |
| 159Tb (KED) | 105.090 %             |                   |
| 164Dy (KED) | 0.092 ppb             |                   |
| 166Er (KED) | 0.038 ppb             |                   |
| 169Tm (KED) | 0.005 ppb             |                   |
| 174Yb (KED) | 0.032 ppb             |                   |
| 175Lu (KED) | -0.120 ppb            |                   |
| 205Tl (KED) | 0.018 ppb             |                   |
| 208Pb (KED) | 1.527 ppb             |                   |
| 209Bi (KED) | 84.560 %              |                   |
| 232Th (KED) | 0.318 ppb             |                   |
| 238U (KED)  | 0.079 ppb             |                   |

| Category   | Concentration average | Intensity average | Intensity RSD |
|------------|-----------------------|-------------------|---------------|
| 6Li (KED)  | 128.973 %             | 5,918 cps         |               |
| 9Be (KED)  | 0.105 ppb             | 13 cps            |               |
| 11B (KED)  | -15.094 ppb           | 480 cps           |               |
| 24Mg (KED) | 857.402 ppb           | 374,168 cps       |               |
| 27Al (KED) | 938.165 ppb           | 110,225 cps       |               |

| Category    | Concentration average | Intensity average | Intensity RSD |
|-------------|-----------------------|-------------------|---------------|
| 45Sc (KED)  | 145.372 %             | 83,434 cps        |               |
| 51V (KED)   | 1.609 ppb             | 11,592 cps        |               |
| 52Cr (KED)  | 3.925 ppb             | 44,553 cps        |               |
| 55Mn (KED)  | 23.822 ppb            | 133,065 cps       |               |
| 56Fe (KED)  | 1,143.966 ppb         | 11,694,965 cps    |               |
| 58Ni (KED)  | 4.641 ppb             | 64,791 cps        |               |
| 59Co (KED)  | 0.443 ppb             | 9,964 cps         |               |
| 63Cu (KED)  | 9.333 ppb             | 136,172 cps       |               |
| 64Zn (KED)  | 156.941 ppb           | 585,051 cps       |               |
| 69Ga (KED)  | 1.948 ppb             | 9,253 cps         |               |
| 75As (KED)  | 0.716 ppb             | 803 cps           |               |
| 80Se (KED)  | 0.570 ppb             | 1,123 cps         |               |
| 85Rb (KED)  | 5.771 ppb             | 26,775 cps        |               |
| 88Sr (KED)  | 11.950 ppb            | 79,023 cps        |               |
| 89Y (KED)   | 126.392 %             | 722,398 cps       |               |
| 107Ag (KED) | 0.043 ppb             | 2,030 cps         |               |
| 114Cd (KED) | 0.057 ppb             | 963 cps           |               |
| 115In (KED) | 110.307 %             | 1,299,284 cps     |               |
| 133Cs (KED) | 0.193 ppb             | 4,544 cps         |               |
| 138Ba (KED) | 6.919 ppb             | 228,158 cps       |               |
| 139La (KED) | 0.778 ppb             | 54,455 cps        |               |
| 140Ce (KED) | 1.653 ppb             | 154,667 cps       |               |
| 141Pr (KED) | 0.192 ppb             | 19,045 cps        |               |
| 142Nd (KED) | 1.042 ppb             | 41,355 cps        |               |
| 152Sm (KED) | 0.139 ppb             | 5,238 cps         |               |
| 153Eu (KED) | 0.029 ppb             | 2,297 cps         |               |
| 158Gd (KED) | 0.130 ppb             | 7,079 cps         |               |
| 159Tb (KED) | 105.090 %             | 7,697,452 cps     |               |
| 164Dy (KED) | 0.092 ppb             | 5,691 cps         |               |
| 166Er (KED) | 0.038 ppb             | 3,534 cps         |               |
| 169Tm (KED) | 0.005 ppb             | 1,413 cps         |               |
| 174Yb (KED) | 0.032 ppb             | 3,087 cps         |               |
| 175Lu (KED) | -0.120 ppb            | 34,869 cps        |               |
| 205Tl (KED) | 0.018 ppb             | 2,964 cps         |               |
| 208Pb (KED) | 1.527 ppb             | 179,672 cps       |               |
| 209Bi (KED) | 84.560 %              | 6,136,455 cps     |               |
| 232Th (KED) | 0.318 ppb             | 73,322 cps        |               |
| 238U (KED)  | 0.079 ppb             | 21,659 cps        |               |

## Sample Summary

Instrument ID: iCAP Q

Analysis index: 28

Analysis name: 026333(0007)jian

Analysis started at: 9/26/2021 4:04:45 PM

User name: WINDOWS-UPCI4ER\Administrator

| Category    | Concentration average | Concentration RSD |
|-------------|-----------------------|-------------------|
| 6Li (KED)   | 135.877 %             |                   |
| 9Be (KED)   | 0.025 ppb             |                   |
| 11B (KED)   | -8.432 ppb            |                   |
| 24Mg (KED)  | 1,700.233 ppb         |                   |
| 27Al (KED)  | 1,815.951 ppb         |                   |
| 45Sc (KED)  | 151.858 %             |                   |
| 51V (KED)   | 3.291 ppb             |                   |
| 52Cr (KED)  | 4.332 ppb             |                   |
| 55Mn (KED)  | 45.118 ppb            |                   |
| 56Fe (KED)  | 1,866.852 ppb         |                   |
| 58Ni (KED)  | 7.550 ppb             |                   |
| 59Co (KED)  | 0.827 ppb             |                   |
| 63Cu (KED)  | 12.766 ppb            |                   |
| 64Zn (KED)  | 165.797 ppb           |                   |
| 69Ga (KED)  | 4.103 ppb             |                   |
| 75As (KED)  | 1.030 ppb             |                   |
| 80Se (KED)  | 0.831 ppb             |                   |
| 85Rb (KED)  | 5.580 ppb             |                   |
| 88Sr (KED)  | 28.737 ppb            |                   |
| 89Y (KED)   | 125.589 %             |                   |
| 107Ag (KED) | 0.065 ppb             |                   |
| 114Cd (KED) | 0.084 ppb             |                   |
| 115In (KED) | 110.629 %             |                   |
| 133Cs (KED) | 0.385 ppb             |                   |
| 138Ba (KED) | 13.759 ppb            |                   |
| 139La (KED) | 1.505 ppb             |                   |
| 140Ce (KED) | 3.191 ppb             |                   |
| 141Pr (KED) | 0.371 ppb             |                   |
| 142Nd (KED) | 1.987 ppb             |                   |
| 152Sm (KED) | 0.280 ppb             |                   |
| 153Eu (KED) | 0.054 ppb             |                   |
| 158Gd (KED) | 0.244 ppb             |                   |
| 159Tb (KED) | 104.872 %             |                   |
| 164Dy (KED) | 0.168 ppb             |                   |
| 166Er (KED) | 0.076 ppb             |                   |
| 169Tm (KED) | 0.010 ppb             |                   |
| 174Yb (KED) | 0.061 ppb             |                   |
| 175Lu (KED) | -0.112 ppb            |                   |
| 205Tl (KED) | 0.032 ppb             |                   |
| 208Pb (KED) | 2.264 ppb             |                   |
| 209Bi (KED) | 82.088 %              |                   |
| 232Th (KED) | 0.611 ppb             |                   |
| 238U (KED)  | 0.157 ppb             |                   |

| Category   | Concentration average | Intensity average | Intensity RSD |
|------------|-----------------------|-------------------|---------------|
| 6Li (KED)  | 135.877 %             | 6,235 cps         |               |
| 9Be (KED)  | 0.025 ppb             | 3 cps             |               |
| 11B (KED)  | -8.432 ppb            | 920 cps           |               |
| 24Mg (KED) | 1,700.233 ppb         | 781,448 cps       |               |
| 27Al (KED) | 1,815.951 ppb         | 222,790 cps       |               |

| Category    | Concentration average | Intensity average | Intensity RSD |
|-------------|-----------------------|-------------------|---------------|
| 45Sc (KED)  | 151.858 %             | 87,157 cps        |               |
| 51V (KED)   | 3.291 ppb             | 24,771 cps        |               |
| 52Cr (KED)  | 4.332 ppb             | 51,349 cps        |               |
| 55Mn (KED)  | 45.118 ppb            | 263,164 cps       |               |
| 56Fe (KED)  | 1,866.852 ppb         | 19,934,705 cps    |               |
| 58Ni (KED)  | 7.550 ppb             | 108,197 cps       |               |
| 59Co (KED)  | 0.827 ppb             | 19,382 cps        |               |
| 63Cu (KED)  | 12.766 ppb            | 184,757 cps       |               |
| 64Zn (KED)  | 165.797 ppb           | 613,948 cps       |               |
| 69Ga (KED)  | 4.103 ppb             | 19,312 cps        |               |
| 75As (KED)  | 1.030 ppb             | 1,140 cps         |               |
| 80Se (KED)  | 0.831 ppb             | 1,200 cps         |               |
| 85Rb (KED)  | 5.580 ppb             | 25,723 cps        |               |
| 88Sr (KED)  | 28.737 ppb            | 188,648 cps       |               |
| 89Y (KED)   | 125.589 %             | 717,804 cps       |               |
| 107Ag (KED) | 0.065 ppb             | 2,960 cps         |               |
| 114Cd (KED) | 0.084 ppb             | 1,383 cps         |               |
| 115In (KED) | 110.629 %             | 1,303,082 cps     |               |
| 133Cs (KED) | 0.385 ppb             | 9,030 cps         |               |
| 138Ba (KED) | 13.759 ppb            | 451,734 cps       |               |
| 139La (KED) | 1.505 ppb             | 105,003 cps       |               |
| 140Ce (KED) | 3.191 ppb             | 297,820 cps       |               |
| 141Pr (KED) | 0.371 ppb             | 36,627 cps        |               |
| 142Nd (KED) | 1.987 ppb             | 78,604 cps        |               |
| 152Sm (KED) | 0.280 ppb             | 10,508 cps        |               |
| 153Eu (KED) | 0.054 ppb             | 4,221 cps         |               |
| 158Gd (KED) | 0.244 ppb             | 13,244 cps        |               |
| 159Tb (KED) | 104.872 %             | 7,681,485 cps     |               |
| 164Dy (KED) | 0.168 ppb             | 10,341 cps        |               |
| 166Er (KED) | 0.076 ppb             | 6,382 cps         |               |
| 169Tm (KED) | 0.010 ppb             | 2,550 cps         |               |
| 174Yb (KED) | 0.061 ppb             | 5,675 cps         |               |
| 175Lu (KED) | -0.112 ppb            | 35,929 cps        |               |
| 205Tl (KED) | 0.032 ppb             | 4,898 cps         |               |
| 208Pb (KED) | 2.264 ppb             | 252,698 cps       |               |
| 209Bi (KED) | 82.088 %              | 5,957,100 cps     |               |
| 232Th (KED) | 0.611 ppb             | 136,567 cps       |               |
| 238U (KED)  | 0.157 ppb             | 41,328 cps        |               |

## Sample Summary

Instrument ID: iCAP Q

Analysis index: 29

Analysis name: 037725(0009)jian

Analysis started at: 9/26/2021 4:06:43 PM

User name: WINDOWS-UPCI4ER\Administrator

| Category    | Concentration average | Concentration RSD |
|-------------|-----------------------|-------------------|
| 6Li (KED)   | 135.296 %             |                   |
| 9Be (KED)   | 0.000 ppb             |                   |
| 11B (KED)   | -17.197 ppb           |                   |
| 24Mg (KED)  | 669.640 ppb           |                   |
| 27Al (KED)  | 757.433 ppb           |                   |
| 45Sc (KED)  | 147.624 %             |                   |
| 51V (KED)   | 1.404 ppb             |                   |
| 52Cr (KED)  | 1.793 ppb             |                   |
| 55Mn (KED)  | 18.698 ppb            |                   |
| 56Fe (KED)  | 842.885 ppb           |                   |
| 58Ni (KED)  | 3.369 ppb             |                   |
| 59Co (KED)  | 0.363 ppb             |                   |
| 63Cu (KED)  | 10.127 ppb            |                   |
| 64Zn (KED)  | 165.574 ppb           |                   |
| 69Ga (KED)  | 1.740 ppb             |                   |
| 75As (KED)  | 0.625 ppb             |                   |
| 80Se (KED)  | 0.833 ppb             |                   |
| 85Rb (KED)  | 4.430 ppb             |                   |
| 88Sr (KED)  | 10.995 ppb            |                   |
| 89Y (KED)   | 123.784 %             |                   |
| 107Ag (KED) | 0.020 ppb             |                   |
| 114Cd (KED) | 0.051 ppb             |                   |
| 115In (KED) | 107.936 %             |                   |
| 133Cs (KED) | 0.181 ppb             |                   |
| 138Ba (KED) | 6.127 ppb             |                   |
| 139La (KED) | 0.725 ppb             |                   |
| 140Ce (KED) | 1.541 ppb             |                   |
| 141Pr (KED) | 0.181 ppb             |                   |
| 142Nd (KED) | 0.939 ppb             |                   |
| 152Sm (KED) | 0.128 ppb             |                   |
| 153Eu (KED) | 0.028 ppb             |                   |
| 158Gd (KED) | 0.106 ppb             |                   |
| 159Tb (KED) | 103.494 %             |                   |
| 164Dy (KED) | 0.075 ppb             |                   |
| 166Er (KED) | 0.031 ppb             |                   |
| 169Tm (KED) | 0.004 ppb             |                   |
| 174Yb (KED) | 0.028 ppb             |                   |
| 175Lu (KED) | -0.128 ppb            |                   |
| 205Tl (KED) | 0.015 ppb             |                   |
| 208Pb (KED) | 0.944 ppb             |                   |
| 209Bi (KED) | 81.605 %              |                   |
| 232Th (KED) | 0.300 ppb             |                   |
| 238U (KED)  | 0.070 ppb             |                   |

| Category   | Concentration average | Intensity average | Intensity RSD |
|------------|-----------------------|-------------------|---------------|
| 6Li (KED)  | 135.296 %             | 6,208 cps         |               |
| 9Be (KED)  | 0.000 ppb             | 0 cps             |               |
| 11B (KED)  | -17.197 ppb           | 373 cps           |               |
| 24Mg (KED) | 669.640 ppb           | 306,612 cps       |               |
| 27Al (KED) | 757.433 ppb           | 90,386 cps        |               |

| Category    | Concentration average | Intensity average | Intensity RSD |
|-------------|-----------------------|-------------------|---------------|
| 45Sc (KED)  | 147.624 %             | 84,727 cps        |               |
| 51V (KED)   | 1.404 ppb             | 10,274 cps        |               |
| 52Cr (KED)  | 1.793 ppb             | 20,731 cps        |               |
| 55Mn (KED)  | 18.698 ppb            | 106,089 cps       |               |
| 56Fe (KED)  | 842.885 ppb           | 8,751,245 cps     |               |
| 58Ni (KED)  | 3.369 ppb             | 48,581 cps        |               |
| 59Co (KED)  | 0.363 ppb             | 8,293 cps         |               |
| 63Cu (KED)  | 10.127 ppb            | 144,630 cps       |               |
| 64Zn (KED)  | 165.574 ppb           | 604,317 cps       |               |
| 69Ga (KED)  | 1.740 ppb             | 8,103 cps         |               |
| 75As (KED)  | 0.625 ppb             | 690 cps           |               |
| 80Se (KED)  | 0.833 ppb             | 1,183 cps         |               |
| 85Rb (KED)  | 4.430 ppb             | 20,136 cps        |               |
| 88Sr (KED)  | 10.995 ppb            | 71,216 cps        |               |
| 89Y (KED)   | 123.784 %             | 707,489 cps       |               |
| 107Ag (KED) | 0.020 ppb             | 1,020 cps         |               |
| 114Cd (KED) | 0.051 ppb             | 840 cps           |               |
| 115In (KED) | 107.936 %             | 1,271,359 cps     |               |
| 133Cs (KED) | 0.181 ppb             | 4,164 cps         |               |
| 138Ba (KED) | 6.127 ppb             | 199,092 cps       |               |
| 139La (KED) | 0.725 ppb             | 49,987 cps        |               |
| 140Ce (KED) | 1.541 ppb             | 142,017 cps       |               |
| 141Pr (KED) | 0.181 ppb             | 17,676 cps        |               |
| 142Nd (KED) | 0.939 ppb             | 36,694 cps        |               |
| 152Sm (KED) | 0.128 ppb             | 4,764 cps         |               |
| 153Eu (KED) | 0.028 ppb             | 2,137 cps         |               |
| 158Gd (KED) | 0.106 ppb             | 5,711 cps         |               |
| 159Tb (KED) | 103.494 %             | 7,580,584 cps     |               |
| 164Dy (KED) | 0.075 ppb             | 4,564 cps         |               |
| 166Er (KED) | 0.031 ppb             | 2,970 cps         |               |
| 169Tm (KED) | 0.004 ppb             | 1,107 cps         |               |
| 174Yb (KED) | 0.028 ppb             | 2,647 cps         |               |
| 175Lu (KED) | -0.128 ppb            | 33,251 cps        |               |
| 205Tl (KED) | 0.015 ppb             | 2,417 cps         |               |
| 208Pb (KED) | 0.944 ppb             | 111,833 cps       |               |
| 209Bi (KED) | 81.605 %              | 5,922,017 cps     |               |
| 232Th (KED) | 0.300 ppb             | 66,751 cps        |               |
| 238U (KED)  | 0.070 ppb             | 18,581 cps        |               |
