# Supplementary material for: Geographic and breed-specific traceability of cashmere via mineral element profiling in Inner Mongolia (Ordos, Chifeng, and Alxa League)
Source: Royal Society of Chemistry journal article supplement (doi:10.1039/d5ra08122j), 2026-01-01
Supplement: d5ra08122j1.zip [file 20210928-a you qi ba yan gao le (1-13)+a you qi ya bu lai zhen (14-24).pdf › ԭʼ޿/20210928-a you qi ba yan gao le (1-13)+a you qi ya bu lai zhen (14-24).pdf]

## Instrument Summary:

Instrument ID: iCAP Q  
Serial Number: Undefined

## Labbook Summary:

Path and filename: \_Application Data\Workspace\LabBooks\wlw\20210928-1.imexp  
Labbook created by: Administrator  
Based on template:  
Hardware configuration: iCAPQ1  
Labbook type: eQuant  
Qtegra version (last saved): 2.7.2425.154  
Labbook started: 9/28/2021 2:52:34 PM  
Labbook finished: 9/28/2021 4:31:50 PM

## Method Summary:

| Isotope     | Mode | Dwell time (s) | # of Channels | Spacing | Resolution | IS          |
|-------------|------|----------------|---------------|---------|------------|-------------|
| 6Li (KED)   | KED  | 0.03           | 3             | 0.1     | Normal     |             |
| 9Be (KED)   | KED  | 0.03           | 3             | 0.1     | Normal     | 6Li (KED)   |
| 11B (KED)   | KED  | 0.03           | 3             | 0.1     | Normal     | 6Li (KED)   |
| 24Mg (KED)  | KED  | 0.03           | 3             | 0.1     | Normal     | 6Li (KED)   |
| 27Al (KED)  | KED  | 0.03           | 3             | 0.1     | Normal     | 45Sc (KED)  |
| 45Sc (KED)  | KED  | 0.03           | 3             | 0.1     | Normal     |             |
| 51V (KED)   | KED  | 0.03           | 3             | 0.1     | Normal     | 45Sc (KED)  |
| 52Cr (KED)  | KED  | 0.03           | 3             | 0.1     | Normal     | 45Sc (KED)  |
| 55Mn (KED)  | KED  | 0.03           | 3             | 0.1     | Normal     | 45Sc (KED)  |
| 56Fe (KED)  | KED  | 0.03           | 3             | 0.1     | Normal     | 45Sc (KED)  |
| 58Ni (KED)  | KED  | 0.03           | 3             | 0.1     | Normal     | 45Sc (KED)  |
| 59Co (KED)  | KED  | 0.03           | 3             | 0.1     | Normal     | 45Sc (KED)  |
| 63Cu (KED)  | KED  | 0.03           | 3             | 0.1     | Normal     | 89Y (KED)   |
| 64Zn (KED)  | KED  | 0.03           | 3             | 0.1     | Normal     | 89Y (KED)   |
| 69Ga (KED)  | KED  | 0.03           | 3             | 0.1     | Normal     | 89Y (KED)   |
| 75As (KED)  | KED  | 0.03           | 3             | 0.1     | Normal     | 89Y (KED)   |
| 80Se (KED)  | KED  | 0.03           | 3             | 0.1     | Normal     | 89Y (KED)   |
| 85Rb (KED)  | KED  | 0.03           | 3             | 0.1     | Normal     | 89Y (KED)   |
| 88Sr (KED)  | KED  | 0.03           | 3             | 0.1     | Normal     | 89Y (KED)   |
| 89Y (KED)   | KED  | 0.03           | 3             | 0.1     | Normal     |             |
| 107Ag (KED) | KED  | 0.03           | 3             | 0.1     | Normal     | 115In (KED) |
| 114Cd (KED) | KED  | 0.03           | 3             | 0.1     | Normal     | 115In (KED) |
| 115In (KED) | KED  | 0.03           | 3             | 0.1     | Normal     |             |
| 133Cs (KED) | KED  | 0.03           | 3             | 0.1     | Normal     | 115In (KED) |
| 138Ba (KED) | KED  | 0.03           | 3             | 0.1     | Normal     | 159Tb (KED) |
| 139La (KED) | KED  | 0.03           | 3             | 0.1     | Normal     | 159Tb (KED) |
| 140Ce (KED) | KED  | 0.03           | 3             | 0.1     | Normal     | 159Tb (KED) |
| 141Pr (KED) | KED  | 0.03           | 3             | 0.1     | Normal     | 159Tb (KED) |
| 142Nd (KED) | KED  | 0.03           | 3             | 0.1     | Normal     | 159Tb (KED) |
| 152Sm (KED) | KED  | 0.03           | 3             | 0.1     | Normal     | 159Tb (KED) |
| 153Eu (KED) | KED  | 0.03           | 3             | 0.1     | Normal     | 159Tb (KED) |
| 158Gd (KED) | KED  | 0.03           | 3             | 0.1     | Normal     | 159Tb (KED) |
| 159Tb (KED) | KED  | 0.03           | 3             | 0.1     | Normal     |             |
| 164Dy (KED) | KED  | 0.03           | 3             | 0.1     | Normal     | 159Tb (KED) |
| 166Er (KED) | KED  | 0.03           | 3             | 0.1     | Normal     | 159Tb (KED) |
| 169Tm (KED) | KED  | 0.03           | 3             | 0.1     | Normal     | 159Tb (KED) |
| 174Yb (KED) | KED  | 0.03           | 3             | 0.1     | Normal     | 159Tb (KED) |
| 175Lu (KED) | KED  | 0.03           | 3             | 0.1     | Normal     | 159Tb (KED) |
| 205Tl (KED) | KED  | 0.03           | 3             | 0.1     | Normal     | 209Bi (KED) |
| 208Pb (KED) | KED  | 0.03           | 3             | 0.1     | Normal     | 209Bi (KED) |
| 209Bi (KED) | KED  | 0.03           | 3             | 0.1     | Normal     |             |
| 232Th (KED) | KED  | 0.03           | 3             | 0.1     | Normal     | 209Bi (KED) |
| 238U (KED)  | KED  | 0.03           | 3             | 0.1     | Normal     | 209Bi (KED) |

| Isotope     | Mode | Dwell time (s) | # of Channels | Spacing | Resolution |
|-------------|------|----------------|---------------|---------|------------|
| 6Li (KED)   | KED  | 0.03           | 3             | 0.1     | Normal     |
| 45Sc (KED)  | KED  | 0.03           | 3             | 0.1     | Normal     |
| 89Y (KED)   | KED  | 0.03           | 3             | 0.1     | Normal     |
| 115In (KED) | KED  | 0.03           | 3             | 0.1     | Normal     |
| 159Tb (KED) | KED  | 0.03           | 3             | 0.1     | Normal     |
| 209Bi (KED) | KED  | 0.03           | 3             | 0.1     | Normal     |

| No. of sweeps | Time per sweep[s] | Time per main run[s] |
|---------------|-------------------|----------------------|
| 10            | 3.87              | 38.7                 |

## Calibration Curves:

9Be (KED)

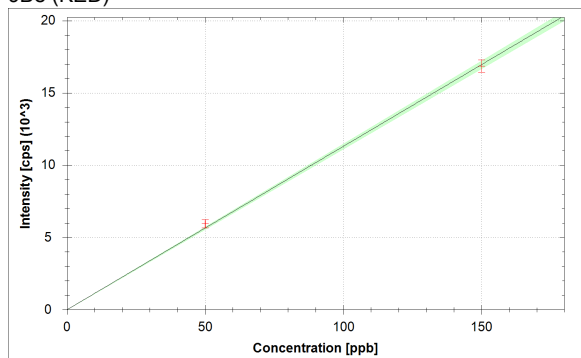

$$f(x) = 112.9946 \cdot x$$

$$R^2 = 0.9995$$

$$\text{BEC} = 0.000 \text{ ppb}$$

$$\text{LoD} = 0.0000 \text{ ppb}$$

11B (KED)

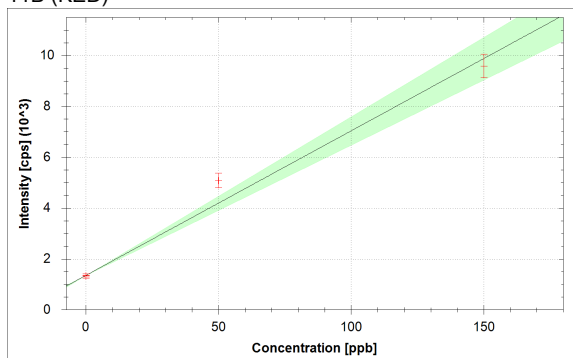

$$f(x) = 56.8505 \cdot x + 1349.7273$$

$$R^2 = 0.9810$$

$$\text{BEC} = 23.742 \text{ ppb}$$

$$\text{LoD} = 4.6424 \text{ ppb}$$

24Mg (KED)

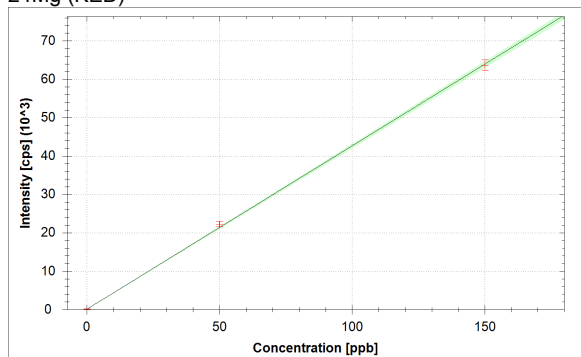

$$f(x) = 425.3132 \cdot x + 99.9182$$

$$R^2 = 0.9997$$

$$\text{BEC} = 0.235 \text{ ppb}$$

$$\text{LoD} = 0.1590 \text{ ppb}$$

27Al (KED)

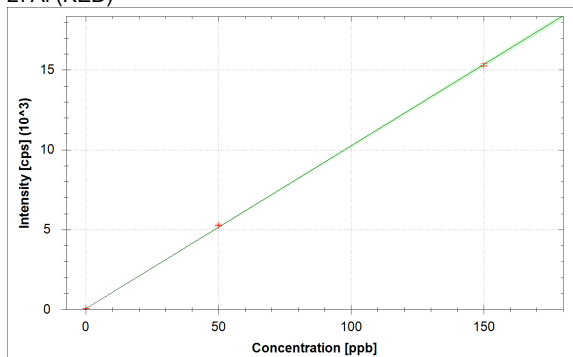

$$f(x) = 101.8536 \cdot x + 59.9787$$

$$R^2 = 0.9999$$

$$\text{BEC} = 0.589 \text{ ppb}$$

$$\text{LoD} = 0.1930 \text{ ppb}$$

51V (KED)

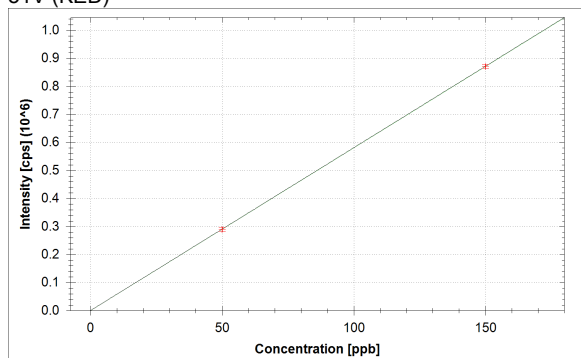

$$f(x) = 5808.5763 \cdot x + 4.3456$$

$$R^2 = 1.0000$$

$$\text{BEC} = 0.001 \text{ ppb}$$

$$\text{LoD} = 0.0017 \text{ ppb}$$

52Cr (KED)

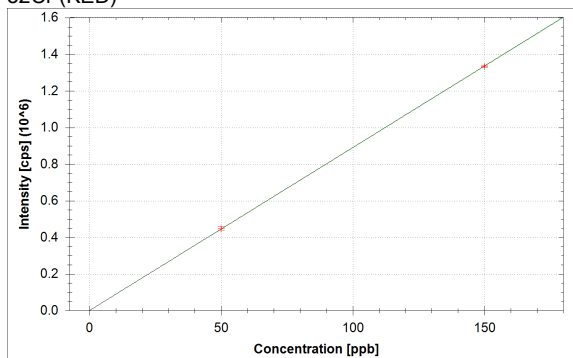

$$f(x) = 8904.4198 \cdot x + 117.9671$$

$$R^2 = 1.0000$$

$$\text{BEC} = 0.013 \text{ ppb}$$

$$\text{LoD} = 0.0067 \text{ ppb}$$

55Mn (KED)

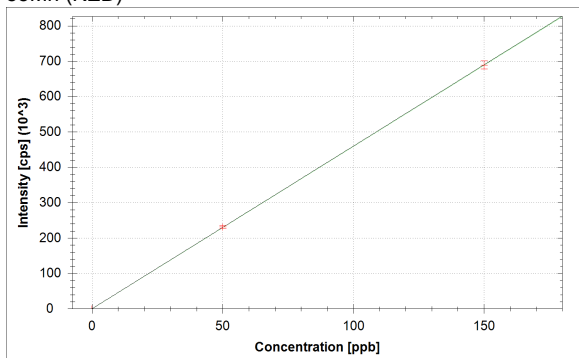

$$f(x) = 4595.8103 \cdot x + 38.1639$$

$$R^2 = 1.0000$$

$$\text{BEC} = 0.008 \text{ ppb}$$

$$\text{LoD} = 0.0078 \text{ ppb}$$

56Fe (KED)

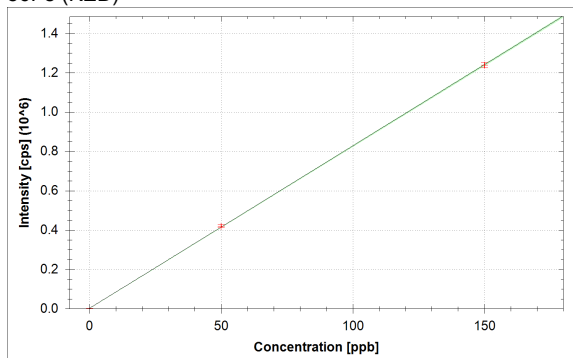

$$f(x) = 8257.8269 \cdot x + 2010.5034$$

$$R^2 = 1.0000$$

$$\text{BEC} = 0.243 \text{ ppb}$$

$$\text{LoD} = 0.0585 \text{ ppb}$$

58Ni (KED)

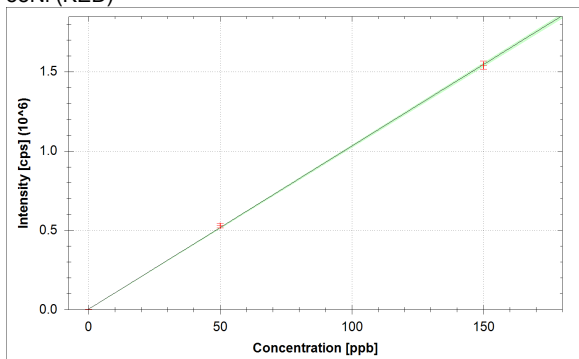

$$f(x) = 10281.8546 \cdot x + 2039.9712$$

$$R^2 = 0.9999$$

$$\text{BEC} = 0.198 \text{ ppb}$$

$$\text{LoD} = 0.0227 \text{ ppb}$$

59Co (KED)

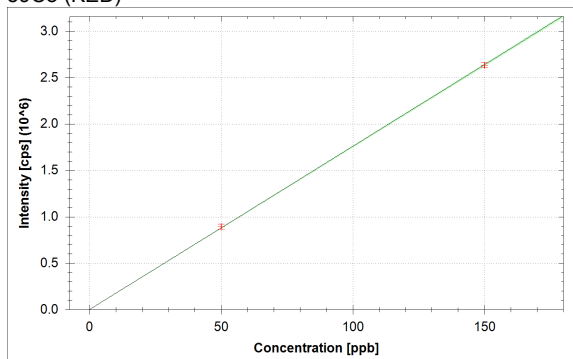

$$f(x) = 17580.7647 \cdot x + 51.2062$$

$$R^2 = 0.9999$$

$$\text{BEC} = 0.003 \text{ ppb}$$

$$\text{LoD} = 0.0006 \text{ ppb}$$

63Cu (KED)

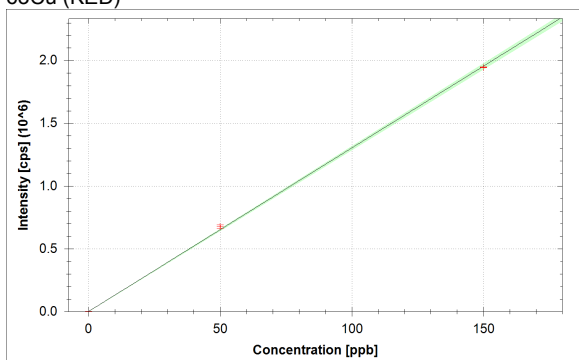

$$f(x) = 13025.3312 \cdot x + 569.9045$$

$$R^2 = 0.9997$$

$$\text{BEC} = 0.044 \text{ ppb}$$

$$\text{LoD} = 0.0087 \text{ ppb}$$

64Zn (KED)

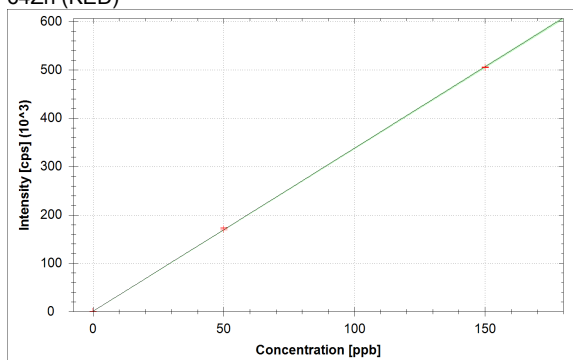

$$f(x) = 3369.7884 \cdot x + 692.4281$$

$$R^2 = 1.0000$$

$$\text{BEC} = 0.205 \text{ ppb}$$

$$\text{LoD} = 0.0445 \text{ ppb}$$

69Ga (KED)

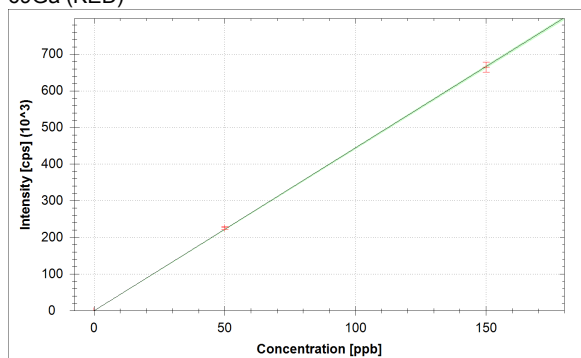

$$f(x) = 4439.1250 \cdot x + 18.9954$$

$$R^2 = 0.9999$$

$$\text{BEC} = 0.004 \text{ ppb}$$

$$\text{LoD} = 0.0083 \text{ ppb}$$

75As (KED)

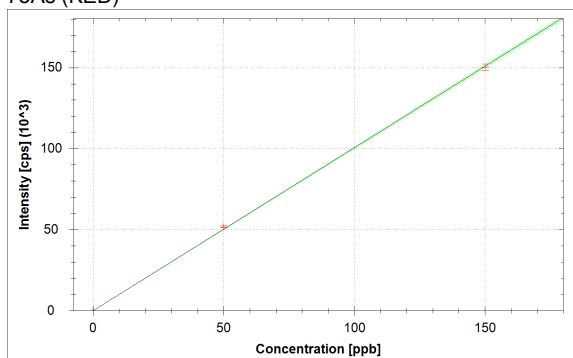

$$f(x) = 1005.1173 \cdot x + 7.8176$$

$$R^2 = 0.9998$$

$$\text{BEC} = 0.008 \text{ ppb}$$

$$\text{LoD} = 0.0354 \text{ ppb}$$

80Se (KED)

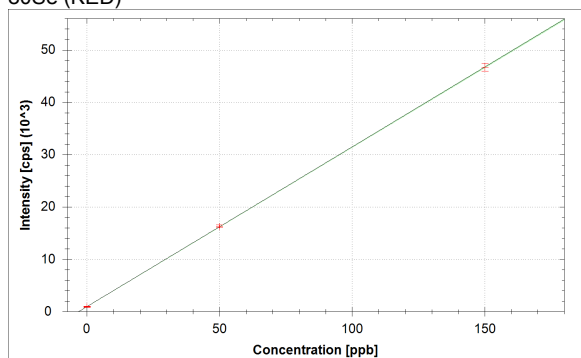

$$f(x) = 305.0660 \cdot x + 950.7937$$

$$R^2 = 1.0000$$

$$\text{BEC} = 3.117 \text{ ppb}$$

$$\text{LoD} = 0.5625 \text{ ppb}$$

85Rb (KED)

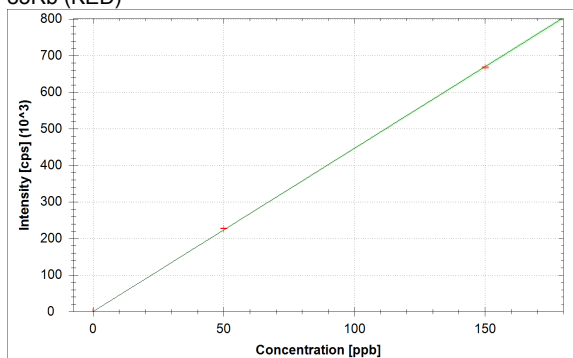

$$f(x) = 4464.1133 \cdot x + 8.9364$$

$$R^2 = 0.9999$$

$$\text{BEC} = 0.002 \text{ ppb}$$

$$\text{LoD} = 0.0035 \text{ ppb}$$

88Sr (KED)

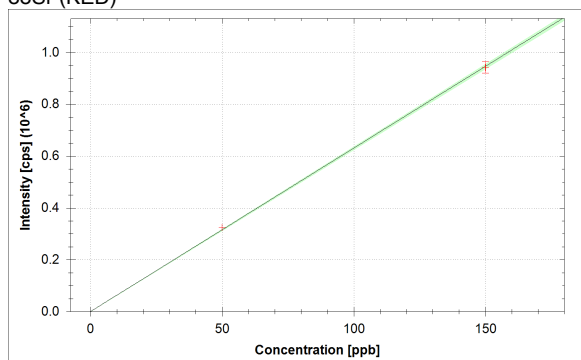

$$f(x) = 6306.3853 \cdot x + 92.7363$$

$$R^2 = 0.9998$$

$$\text{BEC} = 0.015 \text{ ppb}$$

$$\text{LoD} = 0.0097 \text{ ppb}$$

107Ag (KED)

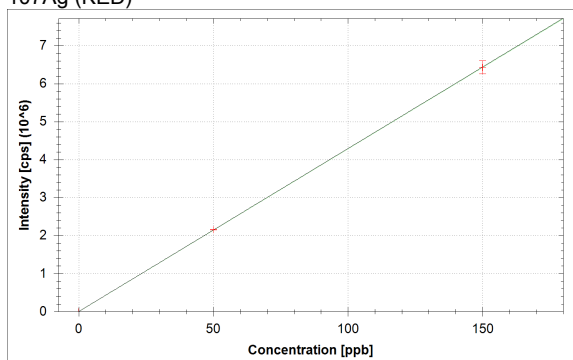

$$f(x) = 42898.9212 \cdot x + 27.3209$$

$$R^2 = 1.0000$$

$$\text{BEC} = 0.001 \text{ ppb}$$

$$\text{LoD} = 0.0003 \text{ ppb}$$

114Cd (KED)

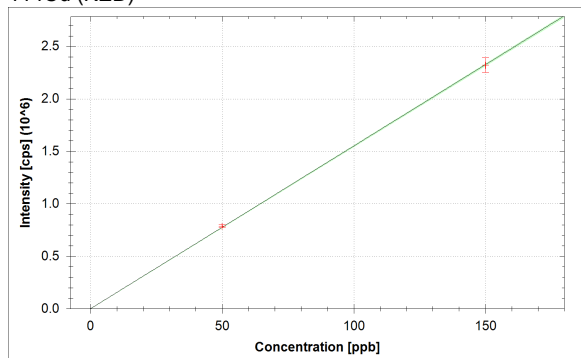

$$f(x) = 15500.6875 \cdot x + 56.0938$$

$$R^2 = 1.0000$$

$$\text{BEC} = 0.004 \text{ ppb}$$

$$\text{LoD} = 0.0044 \text{ ppb}$$

133Cs (KED)

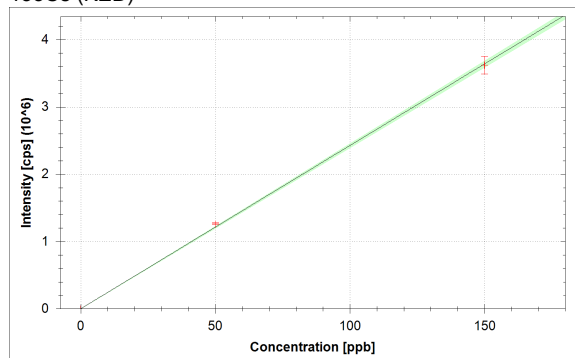

$$f(x) = 24257.5698 \cdot x + 29.6226$$

$$R^2 = 0.9997$$

$$\text{BEC} = 0.001 \text{ ppb}$$

$$\text{LoD} = 0.0017 \text{ ppb}$$

138Ba (KED)

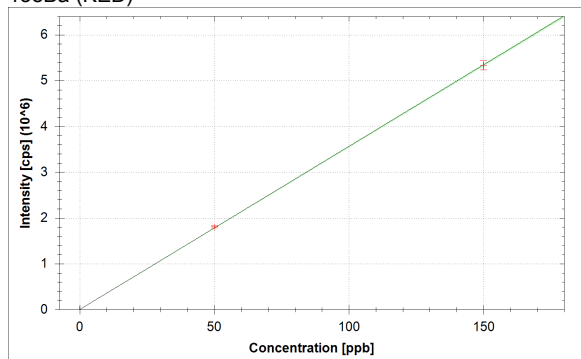

$$f(x) = 35617.7387 \cdot x + 755.3382$$

$$R^2 = 1.0000$$

$$\text{BEC} = 0.021 \text{ ppb}$$

$$\text{LoD} = 0.0019 \text{ ppb}$$

139La (KED)

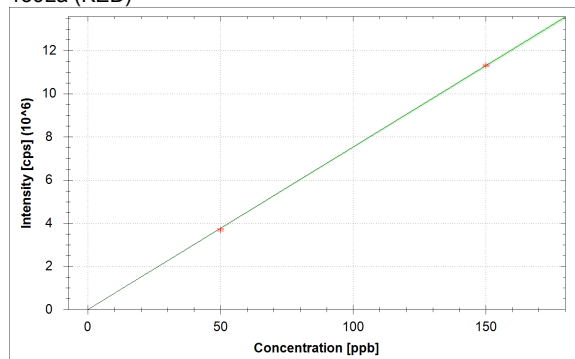

$$f(x) = 75293.7025 \cdot x + 23.3226$$

$$R^2 = 0.9999$$

$$\text{BEC} = 0.000 \text{ ppb}$$

$$\text{LoD} = 0.0004 \text{ ppb}$$

140Ce (KED)

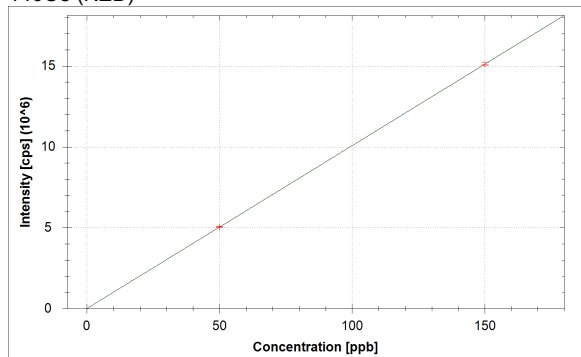

$$f(x) = 100725.7112 \cdot x + 91.0700$$

$$R^2 = 1.0000$$

$$\text{BEC} = 0.001 \text{ ppb}$$

$$\text{LoD} = 0.0004 \text{ ppb}$$

141Pr (KED)

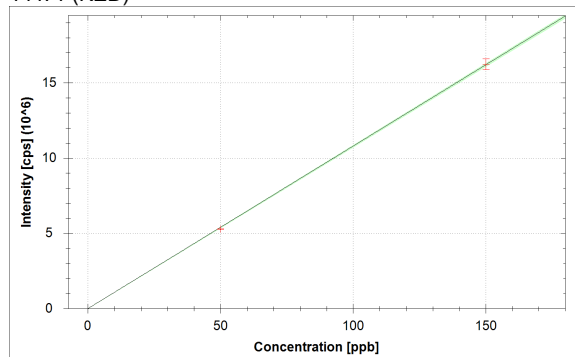

$$f(x) = 107949.3541 \cdot x + 17.7640$$

$$R^2 = 0.9999$$

$$\text{BEC} = 0.000 \text{ ppb}$$

$$\text{LoD} = 0.0004 \text{ ppb}$$

**<sup>142</sup>Nd (KED)**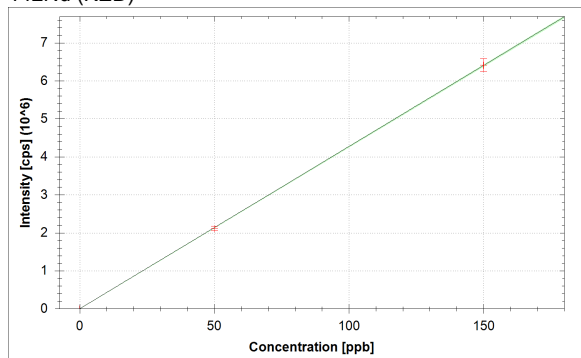

$$f(x) = 42703.7092 \cdot x + 18.8783$$

$$R^2 = 1.0000$$

$$\text{BEC} = 0.000 \text{ ppb}$$

$$\text{LoD} = 0.0005 \text{ ppb}$$

**<sup>152</sup>Sm (KED)**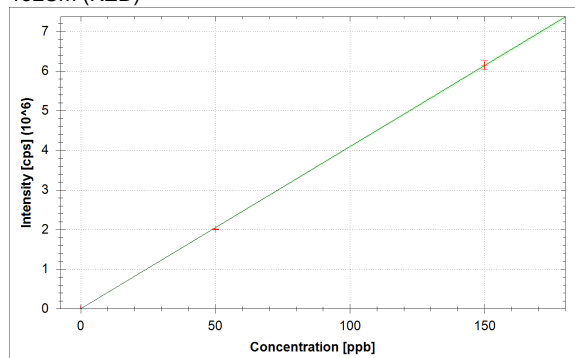

$$f(x) = 40926.8360 \cdot x + 3.3343$$

$$R^2 = 0.9999$$

$$\text{BEC} = 0.000 \text{ ppb}$$

$$\text{LoD} = 0.0002 \text{ ppb}$$

**<sup>153</sup>Eu (KED)**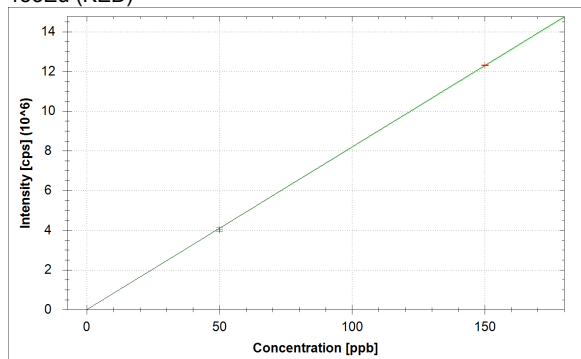

$$f(x) = 81928.8936 \cdot x + 13.3337$$

$$R^2 = 1.0000$$

$$\text{BEC} = 0.000 \text{ ppb}$$

$$\text{LoD} = 0.0002 \text{ ppb}$$

**<sup>158</sup>Gd (KED)**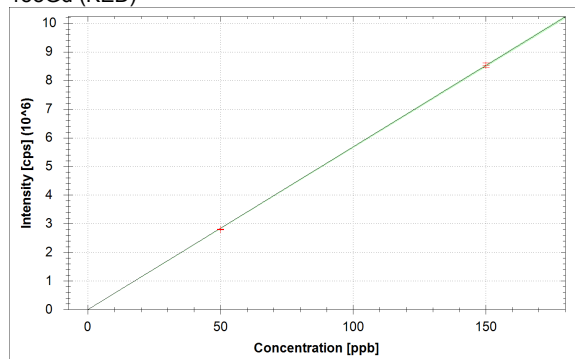

$$f(x) = 56798.5381 \cdot x + 9.9983$$

$$R^2 = 1.0000$$

$$\text{BEC} = 0.000 \text{ ppb}$$

$$\text{LoD} = 0.0003 \text{ ppb}$$

**<sup>164</sup>Dy (KED)**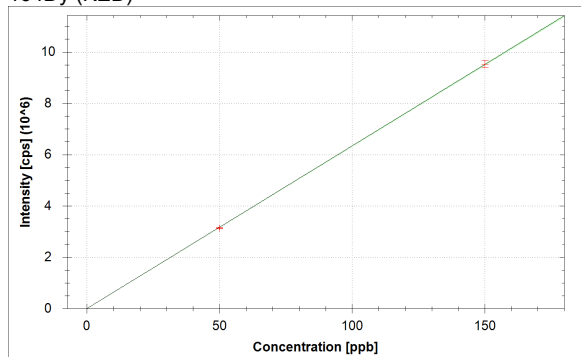

$$f(x) = 63394.8554 \cdot x + 13.3346$$

$$R^2 = 1.0000$$

$$\text{BEC} = 0.000 \text{ ppb}$$

$$\text{LoD} = 0.0001 \text{ ppb}$$

**<sup>166</sup>Er (KED)**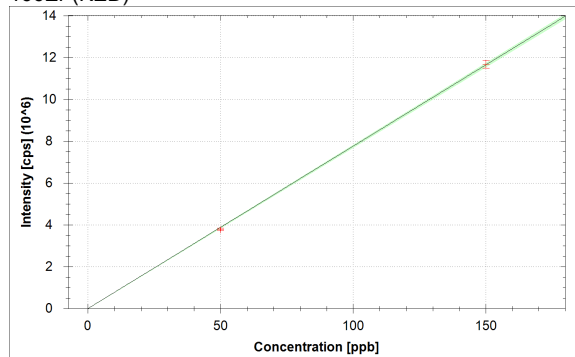

$$f(x) = 77655.0143 \cdot x + 183.2907$$

$$R^2 = 0.9999$$

$$\text{BEC} = 0.002 \text{ ppb}$$

$$\text{LoD} = 0.0012 \text{ ppb}$$

169Tm (KED)

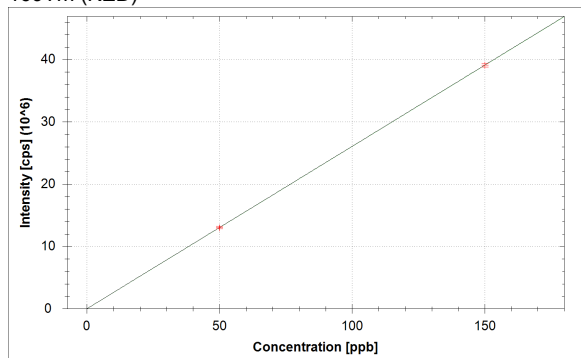

$$f(x) = 260632.9360 \cdot x + 19.9966$$

$$R^2 = 1.0000$$

$$\text{BEC} = 0.000 \text{ ppb}$$

$$\text{LoD} = 0.0001 \text{ ppb}$$

174Yb (KED)

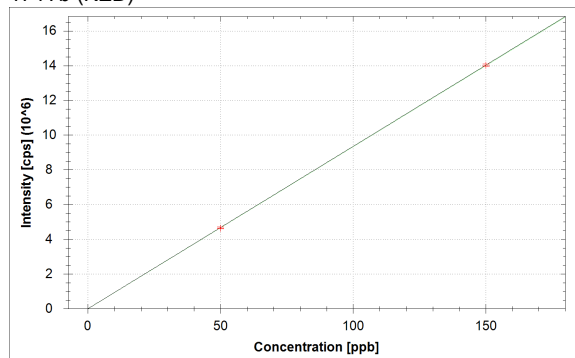

$$f(x) = 93463.2157 \cdot x + 23.3270$$

$$R^2 = 1.0000$$

$$\text{BEC} = 0.000 \text{ ppb}$$

$$\text{LoD} = 0.0001 \text{ ppb}$$

175Lu (KED)

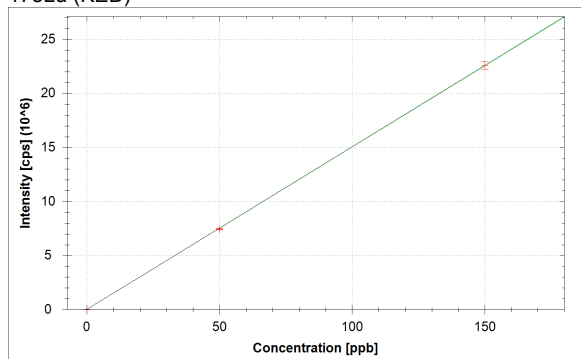

$$f(x) = 150363.8261 \cdot x + 17368.5185$$

$$R^2 = 1.0000$$

$$\text{BEC} = 0.116 \text{ ppb}$$

$$\text{LoD} = 0.0004 \text{ ppb}$$

205Tl (KED)

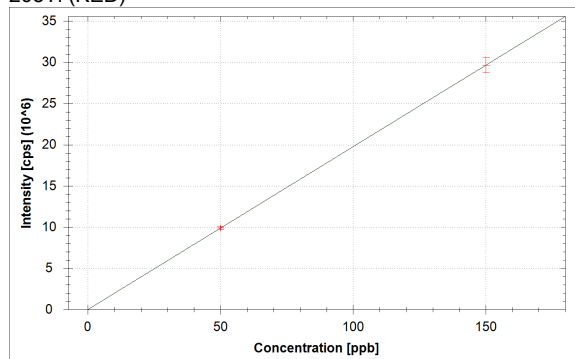

$$f(x) = 197660.9972 \cdot x + 48.3276$$

$$R^2 = 1.0000$$

$$\text{BEC} = 0.000 \text{ ppb}$$

$$\text{LoD} = 0.0000 \text{ ppb}$$

208Pb (KED)

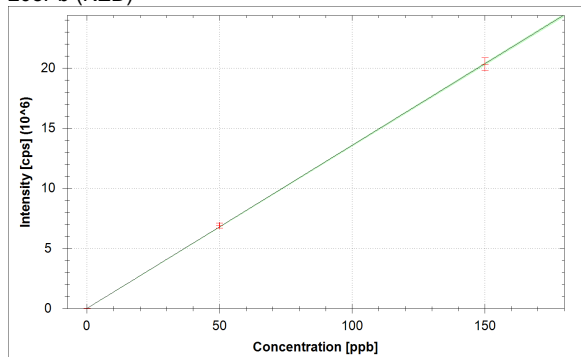

$$f(x) = 135667.5447 \cdot x + 13520.2657$$

$$R^2 = 0.9999$$

$$\text{BEC} = 0.100 \text{ ppb}$$

$$\text{LoD} = 0.0027 \text{ ppb}$$

232Th (KED)

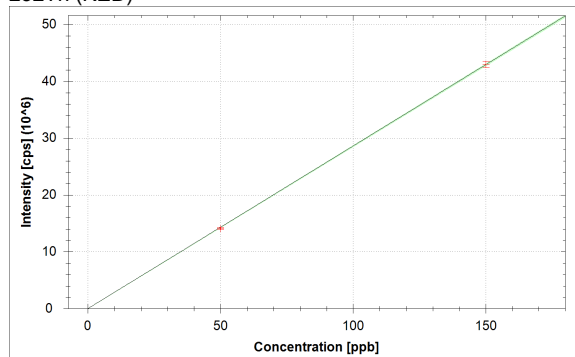

$$f(x) = 286105.1522 \cdot x + 132.4080$$

$$R^2 = 1.0000$$

$$\text{BEC} = 0.000 \text{ ppb}$$

$$\text{LoD} = 0.0002 \text{ ppb}$$

**<sup>238</sup>U (KED)**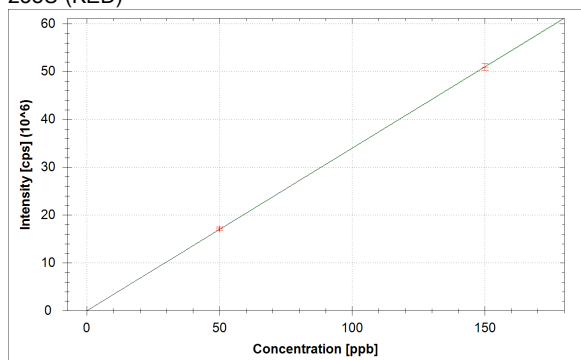

$$f(x) = 339838.7168 \cdot x + 65.2491$$

$$R^2 = 1.0000$$

$$\text{BEC} = 0.000 \text{ ppb}$$

$$\text{LoD} = 0.0009 \text{ ppb}$$

**Standards:**

Analysis Index: 3  
 Analysis Name: 0+20  
 Analysis Type: STD  
 Analysis Started at: 9/28/2021 2:59:14 PM  
 Standard (Stock): std0  
 Standard DF: 1

| Category    | Concentration average | Concentration RSD | Standard Concentration |
|-------------|-----------------------|-------------------|------------------------|
| 6Li (KED)   | 94.715 %              |                   |                        |
| 9Be (KED)   | 0.000 ppb             |                   | 0.000 ppb              |
| 11B (KED)   | 0.000 ppb             | 0.0 %             | 0.000 ppb              |
| 24Mg (KED)  | 0.000 ppb             | 0.2 %             | 0.000 ppb              |
| 27Al (KED)  | 0.000 ppb             | 0.3 %             | 0.000 ppb              |
| 45Sc (KED)  | 101.931 %             |                   |                        |
| 51V (KED)   | 0.000 ppb             | 0.9 %             | 0.000 ppb              |
| 52Cr (KED)  | 0.000 ppb             | 0.2 %             | 0.000 ppb              |
| 55Mn (KED)  | 0.000 ppb             | 0.2 %             | 0.000 ppb              |
| 56Fe (KED)  | 0.000 ppb             | 0.0 %             | 0.000 ppb              |
| 58Ni (KED)  | 0.000 ppb             | 0.0 %             | 0.000 ppb              |
| 59Co (KED)  | 0.000 ppb             | 0.1 %             | 0.000 ppb              |
| 63Cu (KED)  | 0.000 ppb             | 0.1 %             | 0.000 ppb              |
| 64Zn (KED)  | 0.000 ppb             | 0.1 %             | 0.000 ppb              |
| 69Ga (KED)  | 0.000 ppb             | 0.3 %             | 0.000 ppb              |
| 75As (KED)  | 0.000 ppb             | 1.0 %             | 0.000 ppb              |
| 80Se (KED)  | 0.000 ppb             | 0.1 %             | 0.000 ppb              |
| 85Rb (KED)  | 0.000 ppb             | 0.2 %             | 0.000 ppb              |
| 88Sr (KED)  | 0.000 ppb             | 0.2 %             | 0.000 ppb              |
| 89Y (KED)   | 99.474 %              |                   |                        |
| 107Ag (KED) | 0.000 ppb             | 0.6 %             | 0.000 ppb              |
| 114Cd (KED) | 0.000 ppb             | 0.2 %             | 0.000 ppb              |
| 115In (KED) | 101.105 %             |                   |                        |
| 133Cs (KED) | 0.000 ppb             | 0.2 %             | 0.000 ppb              |
| 138Ba (KED) | 0.000 ppb             | 0.0 %             | 0.000 ppb              |
| 139La (KED) | 0.000 ppb             | 0.2 %             | 0.000 ppb              |
| 140Ce (KED) | 0.000 ppb             | 0.2 %             | 0.000 ppb              |
| 141Pr (KED) | 0.000 ppb             | 0.6 %             | 0.000 ppb              |
| 142Nd (KED) | 0.000 ppb             | 0.4 %             | 0.000 ppb              |
| 152Sm (KED) | 0.000 ppb             | 1.0 %             | 0.000 ppb              |
| 153Eu (KED) | 0.000 ppb             | 0.4 %             | 0.000 ppb              |
| 158Gd (KED) | 0.000 ppb             | 0.3 %             | 0.000 ppb              |
| 159Tb (KED) | 100.028 %             |                   |                        |
| 164Dy (KED) | 0.000 ppb             | 0.4 %             | 0.000 ppb              |
| 166Er (KED) | 0.000 ppb             | 0.1 %             | 0.000 ppb              |
| 169Tm (KED) | 0.000 ppb             | 0.3 %             | 0.000 ppb              |
| 174Yb (KED) | 0.000 ppb             | 0.4 %             | 0.000 ppb              |
| 175Lu (KED) | 0.000 ppb             | 0.0 %             | 0.000 ppb              |
| 205Tl (KED) | 0.000 ppb             | 0.1 %             | 0.000 ppb              |
| 208Pb (KED) | 0.000 ppb             | 0.0 %             | 0.000 ppb              |
| 209Bi (KED) | 98.958 %              |                   |                        |
| 232Th (KED) | 0.000 ppb             | 0.2 %             | 0.000 ppb              |
| 238U (KED)  | 0.000 ppb             | 0.5 %             | 0.000 ppb              |

**Standards:**

Analysis Index: 4  
 Analysis Name: 50+20  
 Analysis Type: STD  
 Analysis Started at: 9/28/2021 3:02:33 PM  
 Standard (Stock): std1  
 Standard DF: 1

| Category    | Concentration average | Concentration RSD | Standard Concentration |
|-------------|-----------------------|-------------------|------------------------|
| 6Li (KED)   | 94.984 %              |                   |                        |
| 9Be (KED)   | 52.552 ppb            | 4.9 %             | 50.000 ppb             |
| 11B (KED)   | 65.601 ppb            | 7.7 %             | 50.000 ppb             |
| 24Mg (KED)  | 51.918 ppb            | 2.9 %             | 50.000 ppb             |
| 27Al (KED)  | 51.329 ppb            | 1.1 %             | 50.000 ppb             |
| 45Sc (KED)  | 103.100 %             |                   |                        |
| 51V (KED)   | 49.845 ppb            | 2.3 %             | 50.000 ppb             |
| 52Cr (KED)  | 50.334 ppb            | 2.1 %             | 50.000 ppb             |
| 55Mn (KED)  | 50.316 ppb            | 2.0 %             | 50.000 ppb             |
| 56Fe (KED)  | 50.637 ppb            | 2.2 %             | 50.000 ppb             |
| 58Ni (KED)  | 51.269 ppb            | 2.6 %             | 50.000 ppb             |
| 59Co (KED)  | 50.823 ppb            | 3.1 %             | 50.000 ppb             |
| 63Cu (KED)  | 51.886 ppb            | 2.0 %             | 50.000 ppb             |
| 64Zn (KED)  | 50.708 ppb            | 1.8 %             | 50.000 ppb             |
| 69Ga (KED)  | 50.888 ppb            | 2.0 %             | 50.000 ppb             |
| 75As (KED)  | 51.447 ppb            | 1.0 %             | 50.000 ppb             |
| 80Se (KED)  | 50.264 ppb            | 1.6 %             | 50.000 ppb             |
| 85Rb (KED)  | 50.900 ppb            | 0.4 %             | 50.000 ppb             |
| 88Sr (KED)  | 51.563 ppb            | 0.1 %             | 50.000 ppb             |
| 89Y (KED)   | 100.527 %             |                   |                        |
| 107Ag (KED) | 50.278 ppb            | 0.3 %             | 50.000 ppb             |
| 114Cd (KED) | 50.787 ppb            | 1.9 %             | 50.000 ppb             |
| 115In (KED) | 99.658 %              |                   |                        |
| 133Cs (KED) | 52.097 ppb            | 1.1 %             | 50.000 ppb             |
| 138Ba (KED) | 50.727 ppb            | 1.2 %             | 50.000 ppb             |
| 139La (KED) | 49.002 ppb            | 1.3 %             | 50.000 ppb             |
| 140Ce (KED) | 50.097 ppb            | 1.0 %             | 50.000 ppb             |
| 141Pr (KED) | 48.933 ppb            | 0.2 %             | 50.000 ppb             |
| 142Nd (KED) | 49.359 ppb            | 2.9 %             | 50.000 ppb             |
| 152Sm (KED) | 49.068 ppb            | 0.6 %             | 50.000 ppb             |
| 153Eu (KED) | 49.260 ppb            | 2.6 %             | 50.000 ppb             |
| 158Gd (KED) | 49.278 ppb            | 0.4 %             | 50.000 ppb             |
| 159Tb (KED) | 101.153 %             |                   |                        |
| 164Dy (KED) | 49.457 ppb            | 0.9 %             | 50.000 ppb             |
| 166Er (KED) | 48.681 ppb            | 1.7 %             | 50.000 ppb             |
| 169Tm (KED) | 49.901 ppb            | 1.7 %             | 50.000 ppb             |
| 174Yb (KED) | 49.704 ppb            | 1.1 %             | 50.000 ppb             |
| 175Lu (KED) | 49.482 ppb            | 0.9 %             | 50.000 ppb             |
| 205Tl (KED) | 50.009 ppb            | 1.9 %             | 50.000 ppb             |
| 208Pb (KED) | 50.824 ppb            | 3.2 %             | 50.000 ppb             |
| 209Bi (KED) | 98.331 %              |                   |                        |
| 232Th (KED) | 49.242 ppb            | 1.2 %             | 50.000 ppb             |
| 238U (KED)  | 50.343 ppb            | 2.2 %             | 50.000 ppb             |

**Standards:**

Analysis Index: 5  
 Analysis Name: 100+20  
 Analysis Type: STD  
 Analysis Started at: 9/28/2021 3:06:29 PM  
 Standard (Stock): std2  
 Standard DF: 1

| Category    | Concentration average | Concentration RSD | Standard Concentration |
|-------------|-----------------------|-------------------|------------------------|
| 6Li (KED)   | 97.671 %              |                   |                        |
| 9Be (KED)   | 149.149 ppb           | 2.5 %             | 150.000 ppb            |
| 11B (KED)   | 144.800 ppb           | 5.6 %             | 150.000 ppb            |
| 24Mg (KED)  | 149.361 ppb           | 2.2 %             | 150.000 ppb            |
| 27Al (KED)  | 149.557 ppb           | 0.7 %             | 150.000 ppb            |
| 45Sc (KED)  | 102.904 %             |                   |                        |
| 51V (KED)   | 150.052 ppb           | 0.8 %             | 150.000 ppb            |
| 52Cr (KED)  | 149.889 ppb           | 0.5 %             | 150.000 ppb            |
| 55Mn (KED)  | 149.895 ppb           | 1.7 %             | 150.000 ppb            |
| 56Fe (KED)  | 149.788 ppb           | 1.1 %             | 150.000 ppb            |
| 58Ni (KED)  | 149.577 ppb           | 1.7 %             | 150.000 ppb            |
| 59Co (KED)  | 149.726 ppb           | 1.0 %             | 150.000 ppb            |
| 63Cu (KED)  | 149.371 ppb           | 0.1 %             | 150.000 ppb            |
| 64Zn (KED)  | 149.764 ppb           | 0.2 %             | 150.000 ppb            |
| 69Ga (KED)  | 149.704 ppb           | 2.1 %             | 150.000 ppb            |
| 75As (KED)  | 149.518 ppb           | 1.3 %             | 150.000 ppb            |
| 80Se (KED)  | 149.912 ppb           | 1.6 %             | 150.000 ppb            |
| 85Rb (KED)  | 149.700 ppb           | 0.3 %             | 150.000 ppb            |
| 88Sr (KED)  | 149.479 ppb           | 2.3 %             | 150.000 ppb            |
| 89Y (KED)   | 101.243 %             |                   |                        |
| 107Ag (KED) | 149.907 ppb           | 2.7 %             | 150.000 ppb            |
| 114Cd (KED) | 149.738 ppb           | 3.1 %             | 150.000 ppb            |
| 115In (KED) | 100.703 %             |                   |                        |
| 133Cs (KED) | 149.301 ppb           | 3.6 %             | 150.000 ppb            |
| 138Ba (KED) | 149.758 ppb           | 1.9 %             | 150.000 ppb            |
| 139La (KED) | 150.333 ppb           | 0.5 %             | 150.000 ppb            |
| 140Ce (KED) | 149.968 ppb           | 0.6 %             | 150.000 ppb            |
| 141Pr (KED) | 150.356 ppb           | 2.2 %             | 150.000 ppb            |
| 142Nd (KED) | 150.214 ppb           | 2.7 %             | 150.000 ppb            |
| 152Sm (KED) | 150.311 ppb           | 1.8 %             | 150.000 ppb            |
| 153Eu (KED) | 150.247 ppb           | 0.2 %             | 150.000 ppb            |
| 158Gd (KED) | 150.241 ppb           | 0.9 %             | 150.000 ppb            |
| 159Tb (KED) | 98.882 %              |                   |                        |
| 164Dy (KED) | 150.181 ppb           | 1.5 %             | 150.000 ppb            |
| 166Er (KED) | 150.440 ppb           | 1.6 %             | 150.000 ppb            |
| 169Tm (KED) | 150.033 ppb           | 0.8 %             | 150.000 ppb            |
| 174Yb (KED) | 150.099 ppb           | 0.5 %             | 150.000 ppb            |
| 175Lu (KED) | 150.173 ppb           | 1.6 %             | 150.000 ppb            |
| 205Tl (KED) | 149.997 ppb           | 3.1 %             | 150.000 ppb            |
| 208Pb (KED) | 149.725 ppb           | 2.6 %             | 150.000 ppb            |
| 209Bi (KED) | 97.003 %              |                   |                        |
| 232Th (KED) | 150.253 ppb           | 1.3 %             | 150.000 ppb            |
| 238U (KED)  | 149.886 ppb           | 1.3 %             | 150.000 ppb            |

## Sample List Summary:

Instrument ID: iCAP Q

| Index: | Label:             | Main<br>Runs: | Survey<br>Runs: | Start Time:          | User name:                    |
|--------|--------------------|---------------|-----------------|----------------------|-------------------------------|
| 1      | water              | 3             | 0               | 9/28/2021 2:52:40 PM | WINDOWS-UPCI4ER\Administrator |
| 2      | blk                | 3             | 0               | 9/28/2021 2:55:44 PM | WINDOWS-UPCI4ER\Administrator |
| 3      | 0+20               | 3             | 0               | 9/28/2021 2:59:14 PM | WINDOWS-UPCI4ER\Administrator |
| 4      | 50+20              | 3             | 0               | 9/28/2021 3:02:33 PM | WINDOWS-UPCI4ER\Administrator |
| 5      | 100+20             | 3             | 0               | 9/28/2021 3:06:29 PM | WINDOWS-UPCI4ER\Administrator |
| 6      | 00015(15)jian      | 3             | 0               | 9/28/2021 3:10:11 PM | WINDOWS-UPCI4ER\Administrator |
| 7      | 047279(00087)jian  | 3             | 0               | 9/28/2021 3:14:54 PM | WINDOWS-UPCI4ER\Administrator |
| 8      | 00016(037)jian     | 3             | 0               | 9/28/2021 3:18:50 PM | WINDOWS-UPCI4ER\Administrator |
| 9      | 00018jian          | 3             | 0               | 9/28/2021 3:22:24 PM | WINDOWS-UPCI4ER\Administrator |
| 10     | 047251(00011)jian  | 3             | 0               | 9/28/2021 3:25:47 PM | WINDOWS-UPCI4ER\Administrator |
| 11     | 032361(00012)jian  | 3             | 0               | 9/28/2021 3:29:11 PM | WINDOWS-UPCI4ER\Administrator |
| 12     | 040261(0004)jian   | 3             | 0               | 9/28/2021 3:33:05 PM | WINDOWS-UPCI4ER\Administrator |
| 13     | 047134(00010)jian  | 3             | 0               | 9/28/2021 3:36:37 PM | WINDOWS-UPCI4ER\Administrator |
| 14     | 00014(105)jian     | 3             | 0               | 9/28/2021 3:39:57 PM | WINDOWS-UPCI4ER\Administrator |
| 15     | 032367(0002)jian   | 3             | 0               | 9/28/2021 3:43:49 PM | WINDOWS-UPCI4ER\Administrator |
| 16     | 047248(0006)jian   | 3             | 0               | 9/28/2021 3:47:15 PM | WINDOWS-UPCI4ER\Administrator |
| 17     | 032366(0005)jian   | 3             | 0               | 9/28/2021 3:50:52 PM | WINDOWS-UPCI4ER\Administrator |
| 18     | 032365(0001)jian   | 3             | 0               | 9/28/2021 3:54:36 PM | WINDOWS-UPCI4ER\Administrator |
| 19     | 020519(179195)jian | 3             | 0               | 9/28/2021 3:58:02 PM | WINDOWS-UPCI4ER\Administrator |
| 20     | 020315(107)jian    | 3             | 0               | 9/28/2021 4:01:32 PM | WINDOWS-UPCI4ER\Administrator |
| 21     | 023838(179203)jian | 3             | 0               | 9/28/2021 4:04:57 PM | WINDOWS-UPCI4ER\Administrator |
| 22     | 179179jian         | 3             | 0               | 9/28/2021 4:08:34 PM | WINDOWS-UPCI4ER\Administrator |
| 23     | 051979(179210)jian | 3             | 0               | 9/28/2021 4:12:05 PM | WINDOWS-UPCI4ER\Administrator |
| 24     | 045668(179169)jian | 3             | 0               | 9/28/2021 4:15:34 PM | WINDOWS-UPCI4ER\Administrator |
| 25     | 051973(179157)jian | 3             | 0               | 9/28/2021 4:19:05 PM | WINDOWS-UPCI4ER\Administrator |
| 26     | 051890(179221)jian | 1             | 0               | 9/28/2021 4:22:38 PM | WINDOWS-UPCI4ER\Administrator |
| 27     | 179156jian         | 1             | 0               | 9/28/2021 4:24:45 PM | WINDOWS-UPCI4ER\Administrator |
| 28     | 024757(179205)jian | 1             | 0               | 9/28/2021 4:27:18 PM | WINDOWS-UPCI4ER\Administrator |
| 29     | 041629(179209)jian | 1             | 0               | 9/28/2021 4:29:22 PM | WINDOWS-UPCI4ER\Administrator |

## Sample Summary

Instrument ID: iCAP Q

Analysis index: 1

Analysis name: water

Analysis started at: 9/28/2021 2:52:40 PM

User name: WINDOWS-UPCI4ER\Administrator

| Category    | Concentration average | Concentration RSD |
|-------------|-----------------------|-------------------|
| 6Li (KED)   | 0.134 %               | 0.0 %             |
| 9Be (KED)   | 0.000 ppb             |                   |
| 11B (KED)   | 34.455 ppb            | 146.3 %           |
| 24Mg (KED)  | 71.720 ppb            | 9.4 %             |
| 27Al (KED)  | Infinity ppb          |                   |
| 45Sc (KED)  | 0.054 %               | 100.0 %           |
| 51V (KED)   | Infinity ppb          |                   |
| 52Cr (KED)  | Infinity ppb          |                   |
| 55Mn (KED)  | Infinity ppb          |                   |
| 56Fe (KED)  | Infinity ppb          |                   |
| 58Ni (KED)  | Infinity ppb          |                   |
| 63Cu (KED)  | Infinity ppb          |                   |
| 64Zn (KED)  | Infinity ppb          |                   |
| 69Ga (KED)  | Infinity ppb          |                   |
| 75As (KED)  | Infinity ppb          |                   |
| 80Se (KED)  | Infinity ppb          |                   |
| 88Sr (KED)  | Infinity ppb          |                   |
| 89Y (KED)   | 0.000 %               |                   |
| 107Ag (KED) | Infinity ppb          |                   |
| 114Cd (KED) | Infinity ppb          |                   |
| 115In (KED) | 0.000 %               |                   |
| 138Ba (KED) | Infinity ppb          |                   |
| 159Tb (KED) | 0.000 %               |                   |
| 205Tl (KED) | 18.755 ppb            | 30.2 %            |
| 208Pb (KED) | 480.141 ppb           | 44.5 %            |
| 209Bi (KED) | 0.001 %               | 32.9 %            |
| 232Th (KED) | 0.000 ppb             | 0.0 %             |
| 238U (KED)  | 0.406 ppb             | 173.3 %           |

| Category   | Concentration average | Intensity average | Intensity RSD |
|------------|-----------------------|-------------------|---------------|
| 6Li (KED)  | 0.134 %               | 3 cps             | 0.0 %         |
| 9Be (KED)  | 0.000 ppb             | 0 cps             |               |
| 11B (KED)  | 34.455 ppb            | 4 cps             | 86.6 %        |
| 24Mg (KED) | 71.720 ppb            | 41 cps            | 9.4 %         |
| 27Al (KED) | Infinity ppb          | 2 cps             | 86.6 %        |
| 45Sc (KED) | 0.054 %               | 17 cps            | 100.0 %       |
| 51V (KED)  | Infinity ppb          | 4 cps             | 43.3 %        |
| 52Cr (KED) | Infinity ppb          | 9 cps             | 57.3 %        |
| 55Mn (KED) | Infinity ppb          | 12 cps            | 56.8 %        |
| 56Fe (KED) | Infinity ppb          | 157 cps           | 25.5 %        |
| 58Ni (KED) | Infinity ppb          | 1,296 cps         | 6.4 %         |
| 59Co (KED) |                       | 1 cps             | 173.2 %       |
| 63Cu (KED) | Infinity ppb          | 49 cps            | 15.7 %        |
| 64Zn (KED) | Infinity ppb          | 157 cps           | 22.5 %        |
| 69Ga (KED) | Infinity ppb          | 13 cps            | 25.0 %        |
| 75As (KED) | Infinity ppb          | 16 cps            | 32.7 %        |
| 80Se (KED) | Infinity ppb          | 878 cps           | 7.7 %         |
| 85Rb (KED) |                       | 3 cps             | 100.0 %       |
| 88Sr (KED) | Infinity ppb          | 12 cps            | 41.7 %        |
| 89Y (KED)  | 0.000 %               | 0 cps             |               |

| Category    | Concentration average | Intensity average | Intensity RSD |
|-------------|-----------------------|-------------------|---------------|
| 107Ag (KED) | Infinity ppb          | 7 cps             | 50.0 %        |
| 114Cd (KED) | Infinity ppb          | 6 cps             | 34.6 %        |
| 115In (KED) | 0.000 %               | 0 cps             |               |
| 133Cs (KED) |                       | 1 cps             | 173.2 %       |
| 138Ba (KED) | Infinity ppb          | 73 cps            | 20.8 %        |
| 139La (KED) |                       | 0 cps             |               |
| 140Ce (KED) |                       | 1 cps             | 173.2 %       |
| 141Pr (KED) |                       | 0 cps             |               |
| 142Nd (KED) |                       | 1 cps             | 173.2 %       |
| 152Sm (KED) |                       | 0 cps             |               |
| 153Eu (KED) |                       | 0 cps             |               |
| 158Gd (KED) |                       | 0 cps             |               |
| 159Tb (KED) | 0.000 %               | 0 cps             |               |
| 164Dy (KED) |                       | 0 cps             |               |
| 166Er (KED) |                       | 2 cps             | 173.2 %       |
| 169Tm (KED) |                       | 0 cps             |               |
| 174Yb (KED) |                       | 0 cps             |               |
| 175Lu (KED) |                       | 0 cps             |               |
| 205Tl (KED) | 18.755 ppb            | 22 cps            | 17.3 %        |
| 208Pb (KED) | 480.141 ppb           | 376 cps           | 6.3 %         |
| 209Bi (KED) | 0.001 %               | 21 cps            | 32.9 %        |
| 232Th (KED) | 0.000 ppb             | 0 cps             |               |
| 238U (KED)  | 0.406 ppb             | 1 cps             | 173.2 %       |

## Sample Summary

Instrument ID: iCAP Q

Analysis index: 2

Analysis name: blk

Analysis started at: 9/28/2021 2:55:44 PM

User name: WINDOWS-UPCI4ER\Administrator

| Category    | Concentration average | Concentration RSD |
|-------------|-----------------------|-------------------|
| 6Li (KED)   | 100.000 %             |                   |
| 9Be (KED)   | 0.000 ppb             |                   |
| 11B (KED)   | -0.423 ppb            | 365.7 %           |
| 24Mg (KED)  | 0.059 ppb             | 89.4 %            |
| 27Al (KED)  | -0.055 ppb            | 116.6 %           |
| 45Sc (KED)  | 100.000 %             |                   |
| 51V (KED)   | 0.000 ppb             | 336.1 %           |
| 52Cr (KED)  | -0.001 ppb            | 290.0 %           |
| 55Mn (KED)  | -0.002 ppb            | 126.6 %           |
| 56Fe (KED)  | 0.008 ppb             | 249.0 %           |
| 58Ni (KED)  | 0.008 ppb             | 94.3 %            |
| 59Co (KED)  | -0.001 ppb            | 24.3 %            |
| 63Cu (KED)  | 0.008 ppb             | 38.3 %            |
| 64Zn (KED)  | 0.031 ppb             | 47.7 %            |
| 69Ga (KED)  | 0.003 ppb             | 93.4 %            |
| 75As (KED)  | 0.005 ppb             | 216.8 %           |
| 80Se (KED)  | -0.404 ppb            | 46.4 %            |
| 85Rb (KED)  | 0.000 ppb             | 60,149.4 %        |
| 88Sr (KED)  | 0.000 ppb             | 1,277.3 %         |
| 89Y (KED)   | 100.000 %             |                   |
| 107Ag (KED) | 0.000 ppb             | 27.0 %            |
| 114Cd (KED) | 0.000 ppb             | 305.2 %           |
| 115In (KED) | 100.000 %             |                   |
| 133Cs (KED) | 0.001 ppb             | 84.5 %            |
| 138Ba (KED) | 0.001 ppb             | 42.4 %            |
| 139La (KED) | 0.000 ppb             | 228.4 %           |
| 140Ce (KED) | 0.000 ppb             | 441.6 %           |
| 141Pr (KED) | 0.000 ppb             | 383.8 %           |
| 142Nd (KED) | 0.000 ppb             | 158.4 %           |
| 152Sm (KED) | 0.000 ppb             | 23,298.3 %        |
| 153Eu (KED) | 0.000 ppb             | 65.1 %            |
| 158Gd (KED) | 0.000 ppb             | 468.9 %           |
| 159Tb (KED) | 100.000 %             |                   |
| 164Dy (KED) | 0.000 ppb             | 176.0 %           |
| 166Er (KED) | 0.001 ppb             | 53.2 %            |
| 169Tm (KED) | 0.000 ppb             | 112.6 %           |
| 174Yb (KED) | 0.000 ppb             | 341.9 %           |
| 175Lu (KED) | 0.007 ppb             | 1.9 %             |
| 205Tl (KED) | 0.000 ppb             | 24.0 %            |
| 208Pb (KED) | 0.003 ppb             | 26.5 %            |
| 209Bi (KED) | 100.000 %             |                   |
| 232Th (KED) | 0.000 ppb             | 683.1 %           |
| 238U (KED)  | 0.000 ppb             | 128.5 %           |

| Category   | Concentration average | Intensity average | Intensity RSD |
|------------|-----------------------|-------------------|---------------|
| 6Li (KED)  | 100.000 %             | 2,481 cps         | 4.7 %         |
| 9Be (KED)  | 0.000 ppb             | 0 cps             |               |
| 11B (KED)  | -0.423 ppb            | 1,323 cps         | 3.7 %         |
| 24Mg (KED) | 0.059 ppb             | 124 cps           | 13.5 %        |
| 27Al (KED) | -0.055 ppb            | 54 cps            | 14.1 %        |

| Category    | Concentration average | Intensity average | Intensity RSD |
|-------------|-----------------------|-------------------|---------------|
| 45Sc (KED)  | 100.000 %             | 30,683 cps        | 2.0 %         |
| 51V (KED)   | 0.000 ppb             | 3 cps             | 100.0 %       |
| 52Cr (KED)  | -0.001 ppb            | 111 cps           | 18.1 %        |
| 55Mn (KED)  | -0.002 ppb            | 29 cps            | 43.7 %        |
| 56Fe (KED)  | 0.008 ppb             | 2,077 cps         | 9.5 %         |
| 58Ni (KED)  | 0.008 ppb             | 2,122 cps         | 4.0 %         |
| 59Co (KED)  | -0.001 ppb            | 37 cps            | 9.1 %         |
| 63Cu (KED)  | 0.008 ppb             | 668 cps           | 5.0 %         |
| 64Zn (KED)  | 0.031 ppb             | 798 cps           | 7.4 %         |
| 69Ga (KED)  | 0.003 ppb             | 32 cps            | 39.2 %        |
| 75As (KED)  | 0.005 ppb             | 13 cps            | 90.1 %        |
| 80Se (KED)  | -0.404 ppb            | 828 cps           | 7.8 %         |
| 85Rb (KED)  | 0.000 ppb             | 9 cps             | 57.3 %        |
| 88Sr (KED)  | 0.000 ppb             | 91 cps            | 22.4 %        |
| 89Y (KED)   | 100.000 %             | 296,111 cps       | 1.2 %         |
| 107Ag (KED) | 0.000 ppb             | 9 cps             | 57.3 %        |
| 114Cd (KED) | 0.000 ppb             | 63 cps            | 34.5 %        |
| 115In (KED) | 100.000 %             | 585,656 cps       | 1.5 %         |
| 133Cs (KED) | 0.001 ppb             | 46 cps            | 29.6 %        |
| 138Ba (KED) | 0.001 ppb             | 808 cps           | 2.1 %         |
| 139La (KED) | 0.000 ppb             | 28 cps            | 36.7 %        |
| 140Ce (KED) | 0.000 ppb             | 94 cps            | 15.9 %        |
| 141Pr (KED) | 0.000 ppb             | 14 cps            | 87.4 %        |
| 142Nd (KED) | 0.000 ppb             | 14 cps            | 48.0 %        |
| 152Sm (KED) | 0.000 ppb             | 3 cps             | 100.0 %       |
| 153Eu (KED) | 0.000 ppb             | 6 cps             | 91.7 %        |
| 158Gd (KED) | 0.000 ppb             | 9 cps             | 57.3 %        |
| 159Tb (KED) | 100.000 %             | 3,449,898 cps     | 0.6 %         |
| 164Dy (KED) | 0.000 ppb             | 12 cps            | 15.7 %        |
| 166Er (KED) | 0.001 ppb             | 242 cps           | 12.4 %        |
| 169Tm (KED) | 0.000 ppb             | 16 cps            | 32.7 %        |
| 174Yb (KED) | 0.000 ppb             | 22 cps            | 17.3 %        |
| 175Lu (KED) | 0.007 ppb             | 18,378 cps        | 0.7 %         |
| 205Tl (KED) | 0.000 ppb             | 41 cps            | 4.7 %         |
| 208Pb (KED) | 0.003 ppb             | 13,988 cps        | 1.0 %         |
| 209Bi (KED) | 100.000 %             | 3,312,824 cps     | 0.5 %         |
| 232Th (KED) | 0.000 ppb             | 136 cps           | 15.8 %        |
| 238U (KED)  | 0.000 ppb             | 147 cps           | 71.2 %        |

## Sample Summary

Instrument ID: iCAP Q

Analysis index: 3

Analysis name: 0+20

Analysis started at: 9/28/2021 2:59:14 PM

User name: WINDOWS-UPCI4ER\Administrator

| Category    | Concentration average | Concentration RSD |
|-------------|-----------------------|-------------------|
| 6Li (KED)   | 94.715 %              |                   |
| 9Be (KED)   | 0.000 ppb             |                   |
| 11B (KED)   | 0.000 ppb             | 0.0 %             |
| 24Mg (KED)  | 0.000 ppb             | 0.2 %             |
| 27Al (KED)  | 0.000 ppb             | 0.3 %             |
| 45Sc (KED)  | 101.931 %             |                   |
| 51V (KED)   | 0.000 ppb             | 0.9 %             |
| 52Cr (KED)  | 0.000 ppb             | 0.2 %             |
| 55Mn (KED)  | 0.000 ppb             | 0.2 %             |
| 56Fe (KED)  | 0.000 ppb             | 0.0 %             |
| 58Ni (KED)  | 0.000 ppb             | 0.0 %             |
| 59Co (KED)  | 0.000 ppb             | 0.1 %             |
| 63Cu (KED)  | 0.000 ppb             | 0.1 %             |
| 64Zn (KED)  | 0.000 ppb             | 0.1 %             |
| 69Ga (KED)  | 0.000 ppb             | 0.3 %             |
| 75As (KED)  | 0.000 ppb             | 1.0 %             |
| 80Se (KED)  | 0.000 ppb             | 0.1 %             |
| 85Rb (KED)  | 0.000 ppb             | 0.2 %             |
| 88Sr (KED)  | 0.000 ppb             | 0.2 %             |
| 89Y (KED)   | 99.474 %              |                   |
| 107Ag (KED) | 0.000 ppb             | 0.6 %             |
| 114Cd (KED) | 0.000 ppb             | 0.2 %             |
| 115In (KED) | 101.105 %             |                   |
| 133Cs (KED) | 0.000 ppb             | 0.2 %             |
| 138Ba (KED) | 0.000 ppb             | 0.0 %             |
| 139La (KED) | 0.000 ppb             | 0.2 %             |
| 140Ce (KED) | 0.000 ppb             | 0.2 %             |
| 141Pr (KED) | 0.000 ppb             | 0.6 %             |
| 142Nd (KED) | 0.000 ppb             | 0.4 %             |
| 152Sm (KED) | 0.000 ppb             | 1.0 %             |
| 153Eu (KED) | 0.000 ppb             | 0.4 %             |
| 158Gd (KED) | 0.000 ppb             | 0.3 %             |
| 159Tb (KED) | 100.028 %             |                   |
| 164Dy (KED) | 0.000 ppb             | 0.4 %             |
| 166Er (KED) | 0.000 ppb             | 0.1 %             |
| 169Tm (KED) | 0.000 ppb             | 0.3 %             |
| 174Yb (KED) | 0.000 ppb             | 0.4 %             |
| 175Lu (KED) | 0.000 ppb             | 0.0 %             |
| 205Tl (KED) | 0.000 ppb             | 0.1 %             |
| 208Pb (KED) | 0.000 ppb             | 0.0 %             |
| 209Bi (KED) | 98.958 %              |                   |
| 232Th (KED) | 0.000 ppb             | 0.2 %             |
| 238U (KED)  | 0.000 ppb             | 0.5 %             |

| Category   | Concentration average | Intensity average | Intensity RSD |
|------------|-----------------------|-------------------|---------------|
| 6Li (KED)  | 94.715 %              | 2,350 cps         | 4.5 %         |
| 9Be (KED)  | 0.000 ppb             | 0 cps             |               |
| 11B (KED)  | 0.000 ppb             | 1,277 cps         | 0.7 %         |
| 24Mg (KED) | 0.000 ppb             | 94 cps            | 20.1 %        |
| 27Al (KED) | 0.000 ppb             | 61 cps            | 28.0 %        |

| Category    | Concentration average | Intensity average | Intensity RSD |
|-------------|-----------------------|-------------------|---------------|
| 45Sc (KED)  | 101.931 %             | 31,276 cps        | 1.7 %         |
| 51V (KED)   | 0.000 ppb             | 4 cps             | 86.6 %        |
| 52Cr (KED)  | 0.000 ppb             | 120 cps           | 17.3 %        |
| 55Mn (KED)  | 0.000 ppb             | 39 cps            | 21.6 %        |
| 56Fe (KED)  | 0.000 ppb             | 2,049 cps         | 1.2 %         |
| 58Ni (KED)  | 0.000 ppb             | 2,080 cps         | 5.3 %         |
| 59Co (KED)  | 0.000 ppb             | 52 cps            | 9.8 %         |
| 63Cu (KED)  | 0.000 ppb             | 567 cps           | 12.2 %        |
| 64Zn (KED)  | 0.000 ppb             | 689 cps           | 8.7 %         |
| 69Ga (KED)  | 0.000 ppb             | 19 cps            | 27.0 %        |
| 75As (KED)  | 0.000 ppb             | 8 cps             | 99.0 %        |
| 80Se (KED)  | 0.000 ppb             | 946 cps           | 7.2 %         |
| 85Rb (KED)  | 0.000 ppb             | 9 cps             | 21.7 %        |
| 88Sr (KED)  | 0.000 ppb             | 92 cps            | 16.3 %        |
| 89Y (KED)   | 99.474 %              | 294,553 cps       | 0.5 %         |
| 107Ag (KED) | 0.000 ppb             | 28 cps            | 61.6 %        |
| 114Cd (KED) | 0.000 ppb             | 57 cps            | 21.2 %        |
| 115In (KED) | 101.105 %             | 592,125 cps       | 1.4 %         |
| 133Cs (KED) | 0.000 ppb             | 30 cps            | 19.2 %        |
| 138Ba (KED) | 0.000 ppb             | 756 cps           | 4.4 %         |
| 139La (KED) | 0.000 ppb             | 23 cps            | 24.7 %        |
| 140Ce (KED) | 0.000 ppb             | 91 cps            | 18.8 %        |
| 141Pr (KED) | 0.000 ppb             | 18 cps            | 57.3 %        |
| 142Nd (KED) | 0.000 ppb             | 19 cps            | 36.7 %        |
| 152Sm (KED) | 0.000 ppb             | 3 cps             | 100.0 %       |
| 153Eu (KED) | 0.000 ppb             | 13 cps            | 43.3 %        |
| 158Gd (KED) | 0.000 ppb             | 10 cps            | 33.3 %        |
| 159Tb (KED) | 100.028 %             | 3,450,881 cps     | 0.1 %         |
| 164Dy (KED) | 0.000 ppb             | 13 cps            | 43.3 %        |
| 166Er (KED) | 0.000 ppb             | 183 cps           | 7.3 %         |
| 169Tm (KED) | 0.000 ppb             | 20 cps            | 33.3 %        |
| 174Yb (KED) | 0.000 ppb             | 23 cps            | 37.8 %        |
| 175Lu (KED) | 0.000 ppb             | 17,373 cps        | 1.4 %         |
| 205Tl (KED) | 0.000 ppb             | 48 cps            | 8.1 %         |
| 208Pb (KED) | 0.000 ppb             | 13,378 cps        | 2.8 %         |
| 209Bi (KED) | 98.958 %              | 3,278,304 cps     | 1.5 %         |
| 232Th (KED) | 0.000 ppb             | 131 cps           | 16.3 %        |
| 238U (KED)  | 0.000 ppb             | 64 cps            | 52.3 %        |

## Sample Summary

Instrument ID: iCAP Q

Analysis index: 4

Analysis name: 50+20

Analysis started at: 9/28/2021 3:02:33 PM

User name: WINDOWS-UPCI4ER\Administrator

| Category    | Concentration average | Concentration RSD |
|-------------|-----------------------|-------------------|
| 6Li (KED)   | 94.984 %              |                   |
| 9Be (KED)   | 52.552 ppb            | 4.9 %             |
| 11B (KED)   | 65.601 ppb            | 7.7 %             |
| 24Mg (KED)  | 51.918 ppb            | 2.9 %             |
| 27Al (KED)  | 51.329 ppb            | 1.1 %             |
| 45Sc (KED)  | 103.100 %             |                   |
| 51V (KED)   | 49.845 ppb            | 2.3 %             |
| 52Cr (KED)  | 50.334 ppb            | 2.1 %             |
| 55Mn (KED)  | 50.316 ppb            | 2.0 %             |
| 56Fe (KED)  | 50.637 ppb            | 2.2 %             |
| 58Ni (KED)  | 51.269 ppb            | 2.6 %             |
| 59Co (KED)  | 50.823 ppb            | 3.1 %             |
| 63Cu (KED)  | 51.886 ppb            | 2.0 %             |
| 64Zn (KED)  | 50.708 ppb            | 1.8 %             |
| 69Ga (KED)  | 50.888 ppb            | 2.0 %             |
| 75As (KED)  | 51.447 ppb            | 1.0 %             |
| 80Se (KED)  | 50.264 ppb            | 1.6 %             |
| 85Rb (KED)  | 50.900 ppb            | 0.4 %             |
| 88Sr (KED)  | 51.563 ppb            | 0.1 %             |
| 89Y (KED)   | 100.527 %             |                   |
| 107Ag (KED) | 50.278 ppb            | 0.3 %             |
| 114Cd (KED) | 50.787 ppb            | 1.9 %             |
| 115In (KED) | 99.658 %              |                   |
| 133Cs (KED) | 52.097 ppb            | 1.1 %             |
| 138Ba (KED) | 50.727 ppb            | 1.2 %             |
| 139La (KED) | 49.002 ppb            | 1.3 %             |
| 140Ce (KED) | 50.097 ppb            | 1.0 %             |
| 141Pr (KED) | 48.933 ppb            | 0.2 %             |
| 142Nd (KED) | 49.359 ppb            | 2.9 %             |
| 152Sm (KED) | 49.068 ppb            | 0.6 %             |
| 153Eu (KED) | 49.260 ppb            | 2.6 %             |
| 158Gd (KED) | 49.278 ppb            | 0.4 %             |
| 159Tb (KED) | 101.153 %             |                   |
| 164Dy (KED) | 49.457 ppb            | 0.9 %             |
| 166Er (KED) | 48.681 ppb            | 1.7 %             |
| 169Tm (KED) | 49.901 ppb            | 1.7 %             |
| 174Yb (KED) | 49.704 ppb            | 1.1 %             |
| 175Lu (KED) | 49.482 ppb            | 0.9 %             |
| 205Tl (KED) | 50.009 ppb            | 1.9 %             |
| 208Pb (KED) | 50.824 ppb            | 3.2 %             |
| 209Bi (KED) | 98.331 %              |                   |
| 232Th (KED) | 49.242 ppb            | 1.2 %             |
| 238U (KED)  | 50.343 ppb            | 2.2 %             |

| Category   | Concentration average | Intensity average | Intensity RSD |
|------------|-----------------------|-------------------|---------------|
| 6Li (KED)  | 94.984 %              | 2,357 cps         | 4.7 %         |
| 9Be (KED)  | 52.552 ppb            | 5,632 cps         | 2.0 %         |
| 11B (KED)  | 65.601 ppb            | 4,816 cps         | 2.2 %         |
| 24Mg (KED) | 51.918 ppb            | 21,051 cps        | 2.4 %         |
| 27Al (KED) | 51.329 ppb            | 5,451 cps         | 1.1 %         |

| Category    | Concentration average | Intensity average | Intensity RSD |
|-------------|-----------------------|-------------------|---------------|
| 45Sc (KED)  | 103.100 %             | 31,635 cps        | 2.0 %         |
| 51V (KED)   | 49.845 ppb            | 298,423 cps       | 0.9 %         |
| 52Cr (KED)  | 50.334 ppb            | 462,107 cps       | 1.2 %         |
| 55Mn (KED)  | 50.316 ppb            | 238,393 cps       | 1.0 %         |
| 56Fe (KED)  | 50.637 ppb            | 433,063 cps       | 0.2 %         |
| 58Ni (KED)  | 51.269 ppb            | 545,398 cps       | 0.8 %         |
| 59Co (KED)  | 50.823 ppb            | 920,920 cps       | 1.7 %         |
| 63Cu (KED)  | 51.886 ppb            | 679,932 cps       | 1.6 %         |
| 64Zn (KED)  | 50.708 ppb            | 172,463 cps       | 1.5 %         |
| 69Ga (KED)  | 50.888 ppb            | 227,106 cps       | 2.0 %         |
| 75As (KED)  | 51.447 ppb            | 51,989 cps        | 0.6 %         |
| 80Se (KED)  | 50.264 ppb            | 16,371 cps        | 1.7 %         |
| 85Rb (KED)  | 50.900 ppb            | 228,429 cps       | 0.7 %         |
| 88Sr (KED)  | 51.563 ppb            | 326,980 cps       | 0.4 %         |
| 89Y (KED)   | 100.527 %             | 297,671 cps       | 0.4 %         |
| 107Ag (KED) | 50.278 ppb            | 2,149,564 cps     | 1.1 %         |
| 114Cd (KED) | 50.787 ppb            | 784,507 cps       | 1.0 %         |
| 115In (KED) | 99.658 %              | 583,655 cps       | 0.9 %         |
| 133Cs (KED) | 52.097 ppb            | 1,259,474 cps     | 1.5 %         |
| 138Ba (KED) | 50.727 ppb            | 1,828,245 cps     | 0.5 %         |
| 139La (KED) | 49.002 ppb            | 3,731,862 cps     | 0.5 %         |
| 140Ce (KED) | 50.097 ppb            | 5,104,326 cps     | 1.3 %         |
| 141Pr (KED) | 48.933 ppb            | 5,343,100 cps     | 0.7 %         |
| 142Nd (KED) | 49.359 ppb            | 2,131,756 cps     | 2.1 %         |
| 152Sm (KED) | 49.068 ppb            | 2,031,286 cps     | 0.4 %         |
| 153Eu (KED) | 49.260 ppb            | 4,081,750 cps     | 1.7 %         |
| 158Gd (KED) | 49.278 ppb            | 2,831,178 cps     | 0.6 %         |
| 159Tb (KED) | 101.153 %             | 3,489,672 cps     | 0.9 %         |
| 164Dy (KED) | 49.457 ppb            | 3,171,545 cps     | 1.6 %         |
| 166Er (KED) | 48.681 ppb            | 3,823,837 cps     | 1.4 %         |
| 169Tm (KED) | 49.901 ppb            | 13,154,788 cps    | 1.0 %         |
| 174Yb (KED) | 49.704 ppb            | 4,698,811 cps     | 0.4 %         |
| 175Lu (KED) | 49.482 ppb            | 7,543,723 cps     | 1.3 %         |
| 205Tl (KED) | 50.009 ppb            | 9,718,166 cps     | 0.6 %         |
| 208Pb (KED) | 50.824 ppb            | 6,791,298 cps     | 1.8 %         |
| 209Bi (KED) | 98.331 %              | 3,257,537 cps     | 1.5 %         |
| 232Th (KED) | 49.242 ppb            | 13,851,756 cps    | 0.7 %         |
| 238U (KED)  | 50.343 ppb            | 16,821,487 cps    | 2.0 %         |

## Sample Summary

Instrument ID: iCAP Q

Analysis index: 5

Analysis name: 100+20

Analysis started at: 9/28/2021 3:06:29 PM

User name: WINDOWS-UPCI4ER\Administrator

| Category    | Concentration average | Concentration RSD |
|-------------|-----------------------|-------------------|
| 6Li (KED)   | 97.671 %              |                   |
| 9Be (KED)   | 149.149 ppb           | 2.5 %             |
| 11B (KED)   | 144.800 ppb           | 5.6 %             |
| 24Mg (KED)  | 149.361 ppb           | 2.2 %             |
| 27Al (KED)  | 149.557 ppb           | 0.7 %             |
| 45Sc (KED)  | 102.904 %             |                   |
| 51V (KED)   | 150.052 ppb           | 0.8 %             |
| 52Cr (KED)  | 149.889 ppb           | 0.5 %             |
| 55Mn (KED)  | 149.895 ppb           | 1.7 %             |
| 56Fe (KED)  | 149.788 ppb           | 1.1 %             |
| 58Ni (KED)  | 149.577 ppb           | 1.7 %             |
| 59Co (KED)  | 149.726 ppb           | 1.0 %             |
| 63Cu (KED)  | 149.371 ppb           | 0.1 %             |
| 64Zn (KED)  | 149.764 ppb           | 0.2 %             |
| 69Ga (KED)  | 149.704 ppb           | 2.1 %             |
| 75As (KED)  | 149.518 ppb           | 1.3 %             |
| 80Se (KED)  | 149.912 ppb           | 1.6 %             |
| 85Rb (KED)  | 149.700 ppb           | 0.3 %             |
| 88Sr (KED)  | 149.479 ppb           | 2.3 %             |
| 89Y (KED)   | 101.243 %             |                   |
| 107Ag (KED) | 149.907 ppb           | 2.7 %             |
| 114Cd (KED) | 149.738 ppb           | 3.1 %             |
| 115In (KED) | 100.703 %             |                   |
| 133Cs (KED) | 149.301 ppb           | 3.6 %             |
| 138Ba (KED) | 149.758 ppb           | 1.9 %             |
| 139La (KED) | 150.333 ppb           | 0.5 %             |
| 140Ce (KED) | 149.968 ppb           | 0.6 %             |
| 141Pr (KED) | 150.356 ppb           | 2.2 %             |
| 142Nd (KED) | 150.214 ppb           | 2.7 %             |
| 152Sm (KED) | 150.311 ppb           | 1.8 %             |
| 153Eu (KED) | 150.247 ppb           | 0.2 %             |
| 158Gd (KED) | 150.241 ppb           | 0.9 %             |
| 159Tb (KED) | 98.882 %              |                   |
| 164Dy (KED) | 150.181 ppb           | 1.5 %             |
| 166Er (KED) | 150.440 ppb           | 1.6 %             |
| 169Tm (KED) | 150.033 ppb           | 0.8 %             |
| 174Yb (KED) | 150.099 ppb           | 0.5 %             |
| 175Lu (KED) | 150.173 ppb           | 1.6 %             |
| 205Tl (KED) | 149.997 ppb           | 3.1 %             |
| 208Pb (KED) | 149.725 ppb           | 2.6 %             |
| 209Bi (KED) | 97.003 %              |                   |
| 232Th (KED) | 150.253 ppb           | 1.3 %             |
| 238U (KED)  | 149.886 ppb           | 1.3 %             |

| Category   | Concentration average | Intensity average | Intensity RSD |
|------------|-----------------------|-------------------|---------------|
| 6Li (KED)  | 97.671 %              | 2,424 cps         | 2.7 %         |
| 9Be (KED)  | 149.149 ppb           | 16,459 cps        | 3.2 %         |
| 11B (KED)  | 144.800 ppb           | 9,354 cps         | 3.8 %         |
| 24Mg (KED) | 149.361 ppb           | 62,119 cps        | 0.8 %         |
| 27Al (KED) | 149.557 ppb           | 15,737 cps        | 0.2 %         |

| Category    | Concentration average | Intensity average | Intensity RSD |
|-------------|-----------------------|-------------------|---------------|
| 45Sc (KED)  | 102.904 %             | 31,574 cps        | 0.7 %         |
| 51V (KED)   | 150.052 ppb           | 896,880 cps       | 0.5 %         |
| 52Cr (KED)  | 149.889 ppb           | 1,373,541 cps     | 0.6 %         |
| 55Mn (KED)  | 149.895 ppb           | 708,912 cps       | 1.5 %         |
| 56Fe (KED)  | 149.788 ppb           | 1,274,865 cps     | 0.7 %         |
| 58Ni (KED)  | 149.577 ppb           | 1,584,581 cps     | 1.1 %         |
| 59Co (KED)  | 149.726 ppb           | 2,708,818 cps     | 1.3 %         |
| 63Cu (KED)  | 149.371 ppb           | 1,970,382 cps     | 1.3 %         |
| 64Zn (KED)  | 149.764 ppb           | 511,645 cps       | 1.2 %         |
| 69Ga (KED)  | 149.704 ppb           | 672,720 cps       | 0.9 %         |
| 75As (KED)  | 149.518 ppb           | 152,144 cps       | 0.5 %         |
| 80Se (KED)  | 149.912 ppb           | 47,264 cps        | 2.0 %         |
| 85Rb (KED)  | 149.700 ppb           | 676,575 cps       | 0.9 %         |
| 88Sr (KED)  | 149.479 ppb           | 954,397 cps       | 2.1 %         |
| 89Y (KED)   | 101.243 %             | 299,791 cps       | 1.2 %         |
| 107Ag (KED) | 149.907 ppb           | 6,473,632 cps     | 0.5 %         |
| 114Cd (KED) | 149.738 ppb           | 2,336,390 cps     | 0.9 %         |
| 115In (KED) | 100.703 %             | 589,776 cps       | 2.2 %         |
| 133Cs (KED) | 149.301 ppb           | 3,645,381 cps     | 1.8 %         |
| 138Ba (KED) | 149.758 ppb           | 5,275,050 cps     | 1.8 %         |
| 139La (KED) | 150.333 ppb           | 11,192,549 cps    | 0.3 %         |
| 140Ce (KED) | 149.968 ppb           | 14,936,759 cps    | 0.4 %         |
| 141Pr (KED) | 150.356 ppb           | 16,049,682 cps    | 2.3 %         |
| 142Nd (KED) | 150.214 ppb           | 6,343,191 cps     | 2.9 %         |
| 152Sm (KED) | 150.311 ppb           | 6,082,847 cps     | 1.6 %         |
| 153Eu (KED) | 150.247 ppb           | 12,171,990 cps    | 0.3 %         |
| 158Gd (KED) | 150.241 ppb           | 8,438,020 cps     | 0.8 %         |
| 159Tb (KED) | 98.882 %              | 3,411,341 cps     | 0.2 %         |
| 164Dy (KED) | 150.181 ppb           | 9,414,180 cps     | 1.3 %         |
| 166Er (KED) | 150.440 ppb           | 11,552,254 cps    | 1.8 %         |
| 169Tm (KED) | 150.033 ppb           | 38,666,296 cps    | 0.8 %         |
| 174Yb (KED) | 150.099 ppb           | 13,871,851 cps    | 0.3 %         |
| 175Lu (KED) | 150.173 ppb           | 22,345,102 cps    | 1.5 %         |
| 205Tl (KED) | 149.997 ppb           | 28,753,161 cps    | 1.9 %         |
| 208Pb (KED) | 149.725 ppb           | 19,713,542 cps    | 1.6 %         |
| 209Bi (KED) | 97.003 %              | 3,213,551 cps     | 1.2 %         |
| 232Th (KED) | 150.253 ppb           | 41,695,720 cps    | 0.2 %         |
| 238U (KED)  | 149.886 ppb           | 49,414,050 cps    | 2.3 %         |

## Sample Summary

Instrument ID: iCAP Q

Analysis index: 6

Analysis name: 00015(15)jian

Analysis started at: 9/28/2021 3:10:11 PM

User name: WINDOWS-UPCI4ER\Administrator

| Category    | Concentration average | Concentration RSD |
|-------------|-----------------------|-------------------|
| 6Li (KED)   | 90.640 %              | 6.8 %             |
| 9Be (KED)   | 0.133 ppb             | 49.2 %            |
| 11B (KED)   | -14.633 ppb           | 4.8 %             |
| 24Mg (KED)  | 1,191.171 ppb         | 6.2 %             |
| 27Al (KED)  | 1,611.497 ppb         | 1.8 %             |
| 45Sc (KED)  | 98.203 %              | 2.9 %             |
| 51V (KED)   | 2.990 ppb             | 0.9 %             |
| 52Cr (KED)  | 3.386 ppb             | 1.4 %             |
| 55Mn (KED)  | 37.425 ppb            | 0.6 %             |
| 56Fe (KED)  | 1,691.987 ppb         | 1.4 %             |
| 58Ni (KED)  | 7.084 ppb             | 2.2 %             |
| 59Co (KED)  | 0.731 ppb             | 3.8 %             |
| 63Cu (KED)  | 10.072 ppb            | 1.6 %             |
| 64Zn (KED)  | 141.479 ppb           | 1.6 %             |
| 69Ga (KED)  | 2.688 ppb             | 2.7 %             |
| 75As (KED)  | 0.961 ppb             | 2.1 %             |
| 80Se (KED)  | -0.042 ppb            | 572.6 %           |
| 85Rb (KED)  | 3.679 ppb             | 10.5 %            |
| 88Sr (KED)  | 20.194 ppb            | 2.0 %             |
| 89Y (KED)   | 99.612 %              | 0.6 %             |
| 107Ag (KED) | 0.238 ppb             | 84.8 %            |
| 114Cd (KED) | 0.155 ppb             | 95.8 %            |
| 115In (KED) | 95.114 %              | 2.0 %             |
| 133Cs (KED) | 0.456 ppb             | 32.3 %            |
| 138Ba (KED) | 10.839 ppb            | 0.8 %             |
| 139La (KED) | 1.264 ppb             | 5.6 %             |
| 140Ce (KED) | 2.589 ppb             | 2.2 %             |
| 141Pr (KED) | 0.355 ppb             | 13.2 %            |
| 142Nd (KED) | 1.679 ppb             | 2.2 %             |
| 152Sm (KED) | 0.288 ppb             | 11.8 %            |
| 153Eu (KED) | 0.100 ppb             | 26.9 %            |
| 158Gd (KED) | 0.254 ppb             | 9.6 %             |
| 159Tb (KED) | 98.888 %              | 1.1 %             |
| 164Dy (KED) | 0.197 ppb             | 8.9 %             |
| 166Er (KED) | 0.120 ppb             | 9.7 %             |
| 169Tm (KED) | 0.051 ppb             | 18.8 %            |
| 174Yb (KED) | 0.100 ppb             | 6.2 %             |
| 175Lu (KED) | 0.044 ppb             | 15.4 %            |
| 205Tl (KED) | 0.066 ppb             | 3.4 %             |
| 208Pb (KED) | 1.683 ppb             | 0.8 %             |
| 209Bi (KED) | 86.638 %              | 1.0 %             |
| 232Th (KED) | 0.639 ppb             | 5.9 %             |
| 238U (KED)  | 0.168 ppb             | 5.0 %             |

| Category   | Concentration average | Intensity average | Intensity RSD |
|------------|-----------------------|-------------------|---------------|
| 6Li (KED)  | 90.640 %              | 2,249 cps         | 6.8 %         |
| 9Be (KED)  | 0.133 ppb             | 13 cps            | 43.3 %        |
| 11B (KED)  | -14.633 ppb           | 469 cps           | 8.6 %         |
| 24Mg (KED) | 1,191.171 ppb         | 458,001 cps       | 0.4 %         |
| 27Al (KED) | 1,611.497 ppb         | 161,192 cps       | 1.1 %         |

| Category    | Concentration average | Intensity average | Intensity RSD |
|-------------|-----------------------|-------------------|---------------|
| 45Sc (KED)  | 98.203 %              | 30,132 cps        | 2.9 %         |
| 51V (KED)   | 2.990 ppb             | 17,059 cps        | 2.5 %         |
| 52Cr (KED)  | 3.386 ppb             | 29,718 cps        | 1.6 %         |
| 55Mn (KED)  | 37.425 ppb            | 168,948 cps       | 2.9 %         |
| 56Fe (KED)  | 1,691.987 ppb         | 13,719,631 cps    | 1.6 %         |
| 58Ni (KED)  | 7.084 ppb             | 73,504 cps        | 0.7 %         |
| 59Co (KED)  | 0.731 ppb             | 12,666 cps        | 1.0 %         |
| 63Cu (KED)  | 10.072 ppb            | 131,247 cps       | 1.3 %         |
| 64Zn (KED)  | 141.479 ppb           | 475,578 cps       | 1.4 %         |
| 69Ga (KED)  | 2.688 ppb             | 11,906 cps        | 2.1 %         |
| 75As (KED)  | 0.961 ppb             | 970 cps           | 2.7 %         |
| 80Se (KED)  | -0.042 ppb            | 934 cps           | 8.5 %         |
| 85Rb (KED)  | 3.679 ppb             | 16,373 cps        | 10.8 %        |
| 88Sr (KED)  | 20.194 ppb            | 126,949 cps       | 2.1 %         |
| 89Y (KED)   | 99.612 %              | 294,964 cps       | 0.6 %         |
| 107Ag (KED) | 0.238 ppb             | 9,677 cps         | 83.5 %        |
| 114Cd (KED) | 0.155 ppb             | 2,328 cps         | 92.6 %        |
| 115In (KED) | 95.114 %              | 557,043 cps       | 2.0 %         |
| 133Cs (KED) | 0.456 ppb             | 10,513 cps        | 30.9 %        |
| 138Ba (KED) | 10.839 ppb            | 382,503 cps       | 0.9 %         |
| 139La (KED) | 1.264 ppb             | 94,150 cps        | 6.6 %         |
| 140Ce (KED) | 2.589 ppb             | 257,990 cps       | 2.3 %         |
| 141Pr (KED) | 0.355 ppb             | 37,897 cps        | 14.4 %        |
| 142Nd (KED) | 1.679 ppb             | 70,914 cps        | 3.2 %         |
| 152Sm (KED) | 0.288 ppb             | 11,670 cps        | 12.9 %        |
| 153Eu (KED) | 0.100 ppb             | 8,119 cps         | 28.0 %        |
| 158Gd (KED) | 0.254 ppb             | 14,266 cps        | 10.8 %        |
| 159Tb (KED) | 98.888 %              | 3,411,542 cps     | 1.1 %         |
| 164Dy (KED) | 0.197 ppb             | 12,350 cps        | 10.0 %        |
| 166Er (KED) | 0.120 ppb             | 9,405 cps         | 10.7 %        |
| 169Tm (KED) | 0.051 ppb             | 13,231 cps        | 19.8 %        |
| 174Yb (KED) | 0.100 ppb             | 9,273 cps         | 7.1 %         |
| 175Lu (KED) | 0.044 ppb             | 23,743 cps        | 4.7 %         |
| 205Tl (KED) | 0.066 ppb             | 11,412 cps        | 4.4 %         |
| 208Pb (KED) | 1.683 ppb             | 209,590 cps       | 1.6 %         |
| 209Bi (KED) | 86.638 %              | 2,870,181 cps     | 1.0 %         |
| 232Th (KED) | 0.639 ppb             | 158,539 cps       | 6.3 %         |
| 238U (KED)  | 0.168 ppb             | 49,380 cps        | 5.3 %         |

## Sample Summary

Instrument ID: iCAP Q

Analysis index: 7

Analysis name: 047279(00087)jian

Analysis started at: 9/28/2021 3:14:54 PM

User name: WINDOWS-UPCI4ER\Administrator

| Category    | Concentration average | Concentration RSD |
|-------------|-----------------------|-------------------|
| 6Li (KED)   | 107.256 %             | 1.9 %             |
| 9Be (KED)   | 0.055 ppb             | 1.9 %             |
| 11B (KED)   | -16.801 ppb           | 1.4 %             |
| 24Mg (KED)  | 558.225 ppb           | 1.0 %             |
| 27Al (KED)  | 631.154 ppb           | 0.9 %             |
| 45Sc (KED)  | 114.621 %             | 1.7 %             |
| 51V (KED)   | 1.145 ppb             | 2.5 %             |
| 52Cr (KED)  | 2.089 ppb             | 0.9 %             |
| 55Mn (KED)  | 16.083 ppb            | 1.0 %             |
| 56Fe (KED)  | 711.932 ppb           | 1.1 %             |
| 58Ni (KED)  | 3.095 ppb             | 1.5 %             |
| 59Co (KED)  | 0.314 ppb             | 2.2 %             |
| 63Cu (KED)  | 6.983 ppb             | 0.4 %             |
| 64Zn (KED)  | 139.578 ppb           | 1.4 %             |
| 69Ga (KED)  | 1.408 ppb             | 2.0 %             |
| 75As (KED)  | 0.636 ppb             | 10.0 %            |
| 80Se (KED)  | -0.176 ppb            | 57.5 %            |
| 85Rb (KED)  | 2.745 ppb             | 0.6 %             |
| 88Sr (KED)  | 9.983 ppb             | 1.5 %             |
| 89Y (KED)   | 108.724 %             | 1.8 %             |
| 107Ag (KED) | 0.069 ppb             | 4.6 %             |
| 114Cd (KED) | 0.041 ppb             | 18.6 %            |
| 115In (KED) | 102.416 %             | 2.0 %             |
| 133Cs (KED) | 0.149 ppb             | 7.1 %             |
| 138Ba (KED) | 5.143 ppb             | 0.6 %             |
| 139La (KED) | 0.543 ppb             | 1.8 %             |
| 140Ce (KED) | 1.183 ppb             | 5.4 %             |
| 141Pr (KED) | 0.193 ppb             | 46.2 %            |
| 142Nd (KED) | 0.782 ppb             | 12.5 %            |
| 152Sm (KED) | 0.155 ppb             | 52.8 %            |
| 153Eu (KED) | 0.066 ppb             | 96.6 %            |
| 158Gd (KED) | 0.129 ppb             | 44.7 %            |
| 159Tb (KED) | 102.634 %             | 0.3 %             |
| 164Dy (KED) | 0.094 ppb             | 39.0 %            |
| 166Er (KED) | 0.063 ppb             | 47.8 %            |
| 169Tm (KED) | 0.028 ppb             | 84.0 %            |
| 174Yb (KED) | 0.046 ppb             | 49.9 %            |
| 175Lu (KED) | 0.018 ppb             | 122.0 %           |
| 205Tl (KED) | 0.032 ppb             | 44.0 %            |
| 208Pb (KED) | 1.059 ppb             | 2.8 %             |
| 209Bi (KED) | 88.638 %              | 2.9 %             |
| 232Th (KED) | 0.252 ppb             | 5.1 %             |
| 238U (KED)  | 0.069 ppb             | 7.5 %             |

| Category   | Concentration average | Intensity average | Intensity RSD |
|------------|-----------------------|-------------------|---------------|
| 6Li (KED)  | 107.256 %             | 2,661 cps         | 1.9 %         |
| 9Be (KED)  | 0.055 ppb             | 7 cps             | 0.0 %         |
| 11B (KED)  | -16.801 ppb           | 423 cps           | 4.9 %         |
| 24Mg (KED) | 558.225 ppb           | 254,731 cps       | 1.4 %         |
| 27Al (KED) | 631.154 ppb           | 73,760 cps        | 2.5 %         |

| Category    | Concentration average | Intensity average | Intensity RSD |
|-------------|-----------------------|-------------------|---------------|
| 45Sc (KED)  | 114.621 %             | 35,170 cps        | 1.7 %         |
| 51V (KED)   | 1.145 ppb             | 7,623 cps         | 1.8 %         |
| 52Cr (KED)  | 2.089 ppb             | 21,451 cps        | 1.3 %         |
| 55Mn (KED)  | 16.083 ppb            | 84,762 cps        | 1.9 %         |
| 56Fe (KED)  | 711.932 ppb           | 6,741,060 cps     | 2.2 %         |
| 58Ni (KED)  | 3.095 ppb             | 38,809 cps        | 1.9 %         |
| 59Co (KED)  | 0.314 ppb             | 6,383 cps         | 1.2 %         |
| 63Cu (KED)  | 6.983 ppb             | 99,516 cps        | 2.2 %         |
| 64Zn (KED)  | 139.578 ppb           | 512,197 cps       | 3.0 %         |
| 69Ga (KED)  | 1.408 ppb             | 6,817 cps         | 3.3 %         |
| 75As (KED)  | 0.636 ppb             | 703 cps           | 8.9 %         |
| 80Se (KED)  | -0.176 ppb            | 976 cps           | 5.1 %         |
| 85Rb (KED)  | 2.745 ppb             | 13,333 cps        | 2.3 %         |
| 88Sr (KED)  | 9.983 ppb             | 68,544 cps        | 1.4 %         |
| 89Y (KED)   | 108.724 %             | 321,944 cps       | 1.8 %         |
| 107Ag (KED) | 0.069 ppb             | 3,065 cps         | 2.7 %         |
| 114Cd (KED) | 0.041 ppb             | 714 cps           | 15.2 %        |
| 115In (KED) | 102.416 %             | 599,806 cps       | 2.0 %         |
| 133Cs (KED) | 0.149 ppb             | 3,738 cps         | 5.1 %         |
| 138Ba (KED) | 5.143 ppb             | 188,769 cps       | 0.4 %         |
| 139La (KED) | 0.543 ppb             | 42,004 cps        | 1.6 %         |
| 140Ce (KED) | 1.183 ppb             | 122,363 cps       | 5.2 %         |
| 141Pr (KED) | 0.193 ppb             | 21,378 cps        | 45.9 %        |
| 142Nd (KED) | 0.782 ppb             | 34,307 cps        | 12.2 %        |
| 152Sm (KED) | 0.155 ppb             | 6,507 cps         | 52.5 %        |
| 153Eu (KED) | 0.066 ppb             | 5,596 cps         | 96.1 %        |
| 158Gd (KED) | 0.129 ppb             | 7,500 cps         | 44.4 %        |
| 159Tb (KED) | 102.634 %             | 3,540,764 cps     | 0.3 %         |
| 164Dy (KED) | 0.094 ppb             | 6,152 cps         | 38.6 %        |
| 166Er (KED) | 0.063 ppb             | 5,184 cps         | 45.8 %        |
| 169Tm (KED) | 0.028 ppb             | 7,423 cps         | 83.5 %        |
| 174Yb (KED) | 0.046 ppb             | 4,459 cps         | 49.4 %        |
| 175Lu (KED) | 0.018 ppb             | 20,618 cps        | 16.3 %        |
| 205Tl (KED) | 0.032 ppb             | 5,626 cps         | 40.7 %        |
| 208Pb (KED) | 1.059 ppb             | 139,320 cps       | 0.4 %         |
| 209Bi (KED) | 88.638 %              | 2,936,405 cps     | 2.9 %         |
| 232Th (KED) | 0.252 ppb             | 64,018 cps        | 2.6 %         |
| 238U (KED)  | 0.069 ppb             | 20,915 cps        | 5.6 %         |

## Sample Summary

Instrument ID: iCAP Q

Analysis index: 8

Analysis name: 00016(037)jian

Analysis started at: 9/28/2021 3:18:50 PM

User name: WINDOWS-UPCI4ER\Administrator

| Category    | Concentration average | Concentration RSD |
|-------------|-----------------------|-------------------|
| 6Li (KED)   | 115.989 %             | 4.1 %             |
| 9Be (KED)   | 0.043 ppb             | 37.2 %            |
| 11B (KED)   | -15.501 ppb           | 4.1 %             |
| 24Mg (KED)  | 827.331 ppb           | 6.9 %             |
| 27Al (KED)  | 1,035.496 ppb         | 2.3 %             |
| 45Sc (KED)  | 127.486 %             | 2.2 %             |
| 51V (KED)   | 1.862 ppb             | 1.7 %             |
| 52Cr (KED)  | 2.469 ppb             | 2.3 %             |
| 55Mn (KED)  | 23.571 ppb            | 0.8 %             |
| 56Fe (KED)  | 1,062.091 ppb         | 1.4 %             |
| 58Ni (KED)  | 4.435 ppb             | 1.6 %             |
| 59Co (KED)  | 0.450 ppb             | 1.4 %             |
| 63Cu (KED)  | 8.952 ppb             | 0.8 %             |
| 64Zn (KED)  | 143.467 ppb           | 1.0 %             |
| 69Ga (KED)  | 2.174 ppb             | 3.4 %             |
| 75As (KED)  | 0.662 ppb             | 3.0 %             |
| 80Se (KED)  | 0.539 ppb             | 48.7 %            |
| 85Rb (KED)  | 6.248 ppb             | 2.1 %             |
| 88Sr (KED)  | 12.779 ppb            | 0.7 %             |
| 89Y (KED)   | 110.076 %             | 2.0 %             |
| 107Ag (KED) | 0.102 ppb             | 0.6 %             |
| 114Cd (KED) | 0.086 ppb             | 4.7 %             |
| 115In (KED) | 96.534 %              | 1.2 %             |
| 133Cs (KED) | 0.239 ppb             | 10.3 %            |
| 138Ba (KED) | 7.816 ppb             | 5.0 %             |
| 139La (KED) | 0.947 ppb             | 8.7 %             |
| 140Ce (KED) | 1.951 ppb             | 5.9 %             |
| 141Pr (KED) | 0.230 ppb             | 9.9 %             |
| 142Nd (KED) | 1.189 ppb             | 5.2 %             |
| 152Sm (KED) | 0.171 ppb             | 12.6 %            |
| 153Eu (KED) | 0.036 ppb             | 26.7 %            |
| 158Gd (KED) | 0.144 ppb             | 5.0 %             |
| 159Tb (KED) | 93.547 %              | 4.9 %             |
| 164Dy (KED) | 0.104 ppb             | 8.4 %             |
| 166Er (KED) | 0.053 ppb             | 10.5 %            |
| 169Tm (KED) | 0.009 ppb             | 30.1 %            |
| 174Yb (KED) | 0.039 ppb             | 9.5 %             |
| 175Lu (KED) | 0.002 ppb             | 239.7 %           |
| 205Tl (KED) | 0.022 ppb             | 6.7 %             |
| 208Pb (KED) | 1.448 ppb             | 3.2 %             |
| 209Bi (KED) | 76.764 %              | 1.4 %             |
| 232Th (KED) | 0.375 ppb             | 2.2 %             |
| 238U (KED)  | 0.082 ppb             | 0.3 %             |

| Category   | Concentration average | Intensity average | Intensity RSD |
|------------|-----------------------|-------------------|---------------|
| 6Li (KED)  | 115.989 %             | 2,878 cps         | 4.1 %         |
| 9Be (KED)  | 0.043 ppb             | 6 cps             | 34.6 %        |
| 11B (KED)  | -15.501 ppb           | 542 cps           | 3.8 %         |
| 24Mg (KED) | 827.331 ppb           | 407,572 cps       | 4.0 %         |
| 27Al (KED) | 1,035.496 ppb         | 134,543 cps       | 3.5 %         |

| Category    | Concentration average | Intensity average | Intensity RSD |
|-------------|-----------------------|-------------------|---------------|
| 45Sc (KED)  | 127.486 %             | 39,117 cps        | 2.2 %         |
| 51V (KED)   | 1.862 ppb             | 13,794 cps        | 3.9 %         |
| 52Cr (KED)  | 2.469 ppb             | 28,184 cps        | 4.3 %         |
| 55Mn (KED)  | 23.571 ppb            | 138,164 cps       | 2.8 %         |
| 56Fe (KED)  | 1,062.091 ppb         | 11,185,569 cps    | 3.4 %         |
| 58Ni (KED)  | 4.435 ppb             | 60,726 cps        | 2.3 %         |
| 59Co (KED)  | 0.450 ppb             | 10,161 cps        | 1.9 %         |
| 63Cu (KED)  | 8.952 ppb             | 128,990 cps       | 2.5 %         |
| 64Zn (KED)  | 143.467 ppb           | 532,864 cps       | 1.2 %         |
| 69Ga (KED)  | 2.174 ppb             | 10,650 cps        | 5.4 %         |
| 75As (KED)  | 0.662 ppb             | 741 cps           | 4.9 %         |
| 80Se (KED)  | 0.539 ppb             | 1,228 cps         | 7.7 %         |
| 85Rb (KED)  | 6.248 ppb             | 30,718 cps        | 3.7 %         |
| 88Sr (KED)  | 12.779 ppb            | 88,816 cps        | 2.3 %         |
| 89Y (KED)   | 110.076 %             | 325,948 cps       | 2.0 %         |
| 107Ag (KED) | 0.102 ppb             | 4,249 cps         | 1.7 %         |
| 114Cd (KED) | 0.086 ppb             | 1,342 cps         | 3.9 %         |
| 115In (KED) | 96.534 %              | 565,356 cps       | 1.2 %         |
| 133Cs (KED) | 0.239 ppb             | 5,634 cps         | 11.5 %        |
| 138Ba (KED) | 7.816 ppb             | 260,735 cps       | 1.1 %         |
| 139La (KED) | 0.947 ppb             | 66,570 cps        | 3.7 %         |
| 140Ce (KED) | 1.951 ppb             | 183,545 cps       | 0.9 %         |
| 141Pr (KED) | 0.230 ppb             | 23,196 cps        | 4.8 %         |
| 142Nd (KED) | 1.189 ppb             | 47,421 cps        | 0.8 %         |
| 152Sm (KED) | 0.171 ppb             | 6,517 cps         | 7.5 %         |
| 153Eu (KED) | 0.036 ppb             | 2,780 cps         | 21.2 %        |
| 158Gd (KED) | 0.144 ppb             | 7,632 cps         | 1.8 %         |
| 159Tb (KED) | 93.547 %              | 3,227,275 cps     | 4.9 %         |
| 164Dy (KED) | 0.104 ppb             | 6,150 cps         | 3.6 %         |
| 166Er (KED) | 0.053 ppb             | 4,037 cps         | 5.1 %         |
| 169Tm (KED) | 0.009 ppb             | 2,304 cps         | 24.5 %        |
| 174Yb (KED) | 0.039 ppb             | 3,460 cps         | 4.4 %         |
| 175Lu (KED) | 0.002 ppb             | 16,529 cps        | 2.4 %         |
| 205Tl (KED) | 0.022 ppb             | 3,377 cps         | 5.4 %         |
| 208Pb (KED) | 1.448 ppb             | 161,230 cps       | 4.1 %         |
| 209Bi (KED) | 76.764 %              | 2,543,049 cps     | 1.4 %         |
| 232Th (KED) | 0.375 ppb             | 82,485 cps        | 3.4 %         |
| 238U (KED)  | 0.082 ppb             | 21,334 cps        | 1.4 %         |

## Sample Summary

Instrument ID: iCAP Q

Analysis index: 9

Analysis name: 00018jian

Analysis started at: 9/28/2021 3:22:24 PM

User name: WINDOWS-UPCI4ER\Administrator

| Category    | Concentration average | Concentration RSD |
|-------------|-----------------------|-------------------|
| 6Li (KED)   | 119.080 %             | 5.5 %             |
| 9Be (KED)   | 0.025 ppb             | 103.0 %           |
| 11B (KED)   | -17.893 ppb           | 5.8 %             |
| 24Mg (KED)  | 653.048 ppb           | 5.4 %             |
| 27Al (KED)  | 815.197 ppb           | 0.5 %             |
| 45Sc (KED)  | 129.240 %             | 1.3 %             |
| 51V (KED)   | 1.414 ppb             | 1.2 %             |
| 52Cr (KED)  | 1.942 ppb             | 0.7 %             |
| 55Mn (KED)  | 19.795 ppb            | 1.2 %             |
| 56Fe (KED)  | 887.868 ppb           | 2.1 %             |
| 58Ni (KED)  | 3.735 ppb             | 0.8 %             |
| 59Co (KED)  | 0.375 ppb             | 3.1 %             |
| 63Cu (KED)  | 8.535 ppb             | 1.5 %             |
| 64Zn (KED)  | 133.640 ppb           | 0.8 %             |
| 69Ga (KED)  | 2.030 ppb             | 5.0 %             |
| 75As (KED)  | 0.587 ppb             | 5.2 %             |
| 80Se (KED)  | 0.187 ppb             | 52.3 %            |
| 85Rb (KED)  | 2.854 ppb             | 1.9 %             |
| 88Sr (KED)  | 11.061 ppb            | 2.8 %             |
| 89Y (KED)   | 109.597 %             | 1.5 %             |
| 107Ag (KED) | 0.056 ppb             | 5.7 %             |
| 114Cd (KED) | 0.042 ppb             | 1.0 %             |
| 115In (KED) | 97.491 %              | 1.3 %             |
| 133Cs (KED) | 0.169 ppb             | 5.1 %             |
| 138Ba (KED) | 6.902 ppb             | 2.5 %             |
| 139La (KED) | 0.707 ppb             | 3.0 %             |
| 140Ce (KED) | 1.471 ppb             | 3.6 %             |
| 141Pr (KED) | 0.169 ppb             | 2.1 %             |
| 142Nd (KED) | 0.933 ppb             | 0.9 %             |
| 152Sm (KED) | 0.126 ppb             | 2.5 %             |
| 153Eu (KED) | 0.025 ppb             | 7.0 %             |
| 158Gd (KED) | 0.110 ppb             | 2.5 %             |
| 159Tb (KED) | 92.681 %              | 2.3 %             |
| 164Dy (KED) | 0.076 ppb             | 2.5 %             |
| 166Er (KED) | 0.042 ppb             | 7.3 %             |
| 169Tm (KED) | 0.005 ppb             | 6.9 %             |
| 174Yb (KED) | 0.028 ppb             | 0.4 %             |
| 175Lu (KED) | -0.001 ppb            | 219.9 %           |
| 205Tl (KED) | 0.014 ppb             | 4.4 %             |
| 208Pb (KED) | 1.269 ppb             | 2.1 %             |
| 209Bi (KED) | 76.447 %              | 2.0 %             |
| 232Th (KED) | 0.266 ppb             | 0.8 %             |
| 238U (KED)  | 0.064 ppb             | 2.8 %             |

| Category   | Concentration average | Intensity average | Intensity RSD |
|------------|-----------------------|-------------------|---------------|
| 6Li (KED)  | 119.080 %             | 2,955 cps         | 5.5 %         |
| 9Be (KED)  | 0.025 ppb             | 3 cps             | 100.0 %       |
| 11B (KED)  | -17.893 ppb           | 394 cps           | 14.9 %        |
| 24Mg (KED) | 653.048 ppb           | 330,220 cps       | 0.3 %         |
| 27Al (KED) | 815.197 ppb           | 107,390 cps       | 1.7 %         |

| Category    | Concentration average | Intensity average | Intensity RSD |
|-------------|-----------------------|-------------------|---------------|
| 45Sc (KED)  | 129.240 %             | 39,655 cps        | 1.3 %         |
| 51V (KED)   | 1.414 ppb             | 10,621 cps        | 2.2 %         |
| 52Cr (KED)  | 1.942 ppb             | 22,498 cps        | 1.7 %         |
| 55Mn (KED)  | 19.795 ppb            | 117,620 cps       | 1.1 %         |
| 56Fe (KED)  | 887.868 ppb           | 9,477,208 cps     | 1.6 %         |
| 58Ni (KED)  | 3.735 ppb             | 52,271 cps        | 0.7 %         |
| 59Co (KED)  | 0.375 ppb             | 8,589 cps         | 1.8 %         |
| 63Cu (KED)  | 8.535 ppb             | 122,451 cps       | 0.8 %         |
| 64Zn (KED)  | 133.640 ppb           | 494,282 cps       | 0.8 %         |
| 69Ga (KED)  | 2.030 ppb             | 9,895 cps         | 4.4 %         |
| 75As (KED)  | 0.587 ppb             | 656 cps           | 5.2 %         |
| 80Se (KED)  | 0.187 ppb             | 1,104 cps         | 2.3 %         |
| 85Rb (KED)  | 2.854 ppb             | 13,970 cps        | 1.6 %         |
| 88Sr (KED)  | 11.061 ppb            | 76,554 cps        | 3.3 %         |
| 89Y (KED)   | 109.597 %             | 324,530 cps       | 1.5 %         |
| 107Ag (KED) | 0.056 ppb             | 2,388 cps         | 6.4 %         |
| 114Cd (KED) | 0.042 ppb             | 691 cps           | 0.6 %         |
| 115In (KED) | 97.491 %              | 570,961 cps       | 1.3 %         |
| 133Cs (KED) | 0.169 ppb             | 4,032 cps         | 5.2 %         |
| 138Ba (KED) | 6.902 ppb             | 228,477 cps       | 1.3 %         |
| 139La (KED) | 0.707 ppb             | 49,342 cps        | 1.2 %         |
| 140Ce (KED) | 1.471 ppb             | 137,310 cps       | 1.3 %         |
| 141Pr (KED) | 0.169 ppb             | 16,895 cps        | 2.4 %         |
| 142Nd (KED) | 0.933 ppb             | 36,938 cps        | 1.4 %         |
| 152Sm (KED) | 0.126 ppb             | 4,796 cps         | 2.3 %         |
| 153Eu (KED) | 0.025 ppb             | 1,910 cps         | 5.0 %         |
| 158Gd (KED) | 0.110 ppb             | 5,808 cps         | 4.4 %         |
| 159Tb (KED) | 92.681 %              | 3,197,400 cps     | 2.3 %         |
| 164Dy (KED) | 0.076 ppb             | 4,492 cps         | 2.0 %         |
| 166Er (KED) | 0.042 ppb             | 3,169 cps         | 4.7 %         |
| 169Tm (KED) | 0.005 ppb             | 1,312 cps         | 4.8 %         |
| 174Yb (KED) | 0.028 ppb             | 2,487 cps         | 2.7 %         |
| 175Lu (KED) | -0.001 ppb            | 15,882 cps        | 0.6 %         |
| 205Tl (KED) | 0.014 ppb             | 2,211 cps         | 2.9 %         |
| 208Pb (KED) | 1.269 ppb             | 141,958 cps       | 0.9 %         |
| 209Bi (KED) | 76.447 %              | 2,532,571 cps     | 2.0 %         |
| 232Th (KED) | 0.266 ppb             | 58,355 cps        | 1.5 %         |
| 238U (KED)  | 0.064 ppb             | 16,570 cps        | 3.2 %         |

## Sample Summary

Instrument ID: iCAP Q

Analysis index: 10

Analysis name: 047251(00011)jian

Analysis started at: 9/28/2021 3:25:47 PM

User name: WINDOWS-UPCI4ER\Administrator

| Category    | Concentration average | Concentration RSD |
|-------------|-----------------------|-------------------|
| 6Li (KED)   | 116.303 %             | 3.8 %             |
| 9Be (KED)   | 0.060 ppb             | 69.0 %            |
| 11B (KED)   | -17.816 ppb           | 4.3 %             |
| 24Mg (KED)  | 1,049.711 ppb         | 4.4 %             |
| 27Al (KED)  | 1,472.390 ppb         | 0.4 %             |
| 45Sc (KED)  | 127.308 %             | 1.6 %             |
| 51V (KED)   | 2.641 ppb             | 2.7 %             |
| 52Cr (KED)  | 2.788 ppb             | 9.4 %             |
| 55Mn (KED)  | 32.346 ppb            | 1.2 %             |
| 56Fe (KED)  | 1,499.453 ppb         | 1.5 %             |
| 58Ni (KED)  | 6.245 ppb             | 1.5 %             |
| 59Co (KED)  | 0.633 ppb             | 1.2 %             |
| 63Cu (KED)  | 8.413 ppb             | 2.1 %             |
| 64Zn (KED)  | 136.202 ppb           | 0.3 %             |
| 69Ga (KED)  | 3.150 ppb             | 2.2 %             |
| 75As (KED)  | 1.025 ppb             | 8.1 %             |
| 80Se (KED)  | 0.234 ppb             | 86.4 %            |
| 85Rb (KED)  | 3.335 ppb             | 1.7 %             |
| 88Sr (KED)  | 16.878 ppb            | 1.3 %             |
| 89Y (KED)   | 111.660 %             | 0.7 %             |
| 107Ag (KED) | 0.045 ppb             | 2.4 %             |
| 114Cd (KED) | 0.040 ppb             | 8.8 %             |
| 115In (KED) | 97.450 %              | 1.9 %             |
| 133Cs (KED) | 0.320 ppb             | 6.9 %             |
| 138Ba (KED) | 10.959 ppb            | 3.7 %             |
| 139La (KED) | 1.256 ppb             | 4.0 %             |
| 140Ce (KED) | 2.610 ppb             | 2.6 %             |
| 141Pr (KED) | 0.299 ppb             | 3.8 %             |
| 142Nd (KED) | 1.635 ppb             | 4.9 %             |
| 152Sm (KED) | 0.224 ppb             | 5.4 %             |
| 153Eu (KED) | 0.043 ppb             | 7.9 %             |
| 158Gd (KED) | 0.189 ppb             | 2.7 %             |
| 159Tb (KED) | 93.662 %              | 1.9 %             |
| 164Dy (KED) | 0.134 ppb             | 2.3 %             |
| 166Er (KED) | 0.066 ppb             | 3.4 %             |
| 169Tm (KED) | 0.008 ppb             | 8.2 %             |
| 174Yb (KED) | 0.049 ppb             | 5.3 %             |
| 175Lu (KED) | -0.001 ppb            | 289.0 %           |
| 205Tl (KED) | 0.024 ppb             | 6.1 %             |
| 208Pb (KED) | 1.611 ppb             | 1.3 %             |
| 209Bi (KED) | 75.622 %              | 1.1 %             |
| 232Th (KED) | 0.465 ppb             | 3.1 %             |
| 238U (KED)  | 0.112 ppb             | 4.5 %             |

| Category   | Concentration average | Intensity average | Intensity RSD |
|------------|-----------------------|-------------------|---------------|
| 6Li (KED)  | 116.303 %             | 2,886 cps         | 3.8 %         |
| 9Be (KED)  | 0.060 ppb             | 8 cps             | 65.5 %        |
| 11B (KED)  | -17.816 ppb           | 391 cps           | 11.5 %        |
| 24Mg (KED) | 1,049.711 ppb         | 518,783 cps       | 0.6 %         |
| 27Al (KED) | 1,472.390 ppb         | 191,005 cps       | 1.9 %         |

| Category    | Concentration average | Intensity average | Intensity RSD |
|-------------|-----------------------|-------------------|---------------|
| 45Sc (KED)  | 127.308 %             | 39,062 cps        | 1.6 %         |
| 51V (KED)   | 2.641 ppb             | 19,533 cps        | 3.0 %         |
| 52Cr (KED)  | 2.788 ppb             | 31,728 cps        | 7.7 %         |
| 55Mn (KED)  | 32.346 ppb            | 189,282 cps       | 1.0 %         |
| 56Fe (KED)  | 1,499.453 ppb         | 15,763,709 cps    | 0.6 %         |
| 58Ni (KED)  | 6.245 ppb             | 84,335 cps        | 1.7 %         |
| 59Co (KED)  | 0.633 ppb             | 14,220 cps        | 1.0 %         |
| 63Cu (KED)  | 8.413 ppb             | 122,996 cps       | 2.4 %         |
| 64Zn (KED)  | 136.202 ppb           | 513,268 cps       | 0.9 %         |
| 69Ga (KED)  | 3.150 ppb             | 15,636 cps        | 2.0 %         |
| 75As (KED)  | 1.025 ppb             | 1,159 cps         | 7.4 %         |
| 80Se (KED)  | 0.234 ppb             | 1,141 cps         | 5.7 %         |
| 85Rb (KED)  | 3.335 ppb             | 16,631 cps        | 1.3 %         |
| 88Sr (KED)  | 16.878 ppb            | 118,948 cps       | 0.7 %         |
| 89Y (KED)   | 111.660 %             | 330,639 cps       | 0.7 %         |
| 107Ag (KED) | 0.045 ppb             | 1,910 cps         | 0.6 %         |
| 114Cd (KED) | 0.040 ppb             | 651 cps           | 6.1 %         |
| 115In (KED) | 97.450 %              | 570,720 cps       | 1.9 %         |
| 133Cs (KED) | 0.320 ppb             | 7,580 cps         | 4.9 %         |
| 138Ba (KED) | 10.959 ppb            | 366,127 cps       | 2.0 %         |
| 139La (KED) | 1.256 ppb             | 88,569 cps        | 2.2 %         |
| 140Ce (KED) | 2.610 ppb             | 246,241 cps       | 1.0 %         |
| 141Pr (KED) | 0.299 ppb             | 30,183 cps        | 1.9 %         |
| 142Nd (KED) | 1.635 ppb             | 65,366 cps        | 3.0 %         |
| 152Sm (KED) | 0.224 ppb             | 8,574 cps         | 3.5 %         |
| 153Eu (KED) | 0.043 ppb             | 3,313 cps         | 6.1 %         |
| 158Gd (KED) | 0.189 ppb             | 10,045 cps        | 4.0 %         |
| 159Tb (KED) | 93.662 %              | 3,231,228 cps     | 1.9 %         |
| 164Dy (KED) | 0.134 ppb             | 7,994 cps         | 0.4 %         |
| 166Er (KED) | 0.066 ppb             | 4,940 cps         | 1.6 %         |
| 169Tm (KED) | 0.008 ppb             | 2,057 cps         | 6.3 %         |
| 174Yb (KED) | 0.049 ppb             | 4,352 cps         | 3.7 %         |
| 175Lu (KED) | -0.001 ppb            | 16,083 cps        | 2.2 %         |
| 205Tl (KED) | 0.024 ppb             | 3,548 cps         | 5.1 %         |
| 208Pb (KED) | 1.611 ppb             | 175,530 cps       | 1.6 %         |
| 209Bi (KED) | 75.622 %              | 2,505,221 cps     | 1.1 %         |
| 232Th (KED) | 0.465 ppb             | 100,585 cps       | 2.3 %         |
| 238U (KED)  | 0.112 ppb             | 28,906 cps        | 4.9 %         |

## Sample Summary

Instrument ID: iCAP Q

Analysis index: 11

Analysis name: 032361(00012)jian

Analysis started at: 9/28/2021 3:29:11 PM

User name: WINDOWS-UPCI4ER\Administrator

| Category    | Concentration average | Concentration RSD |
|-------------|-----------------------|-------------------|
| 6Li (KED)   | 112.048 %             | 0.2 %             |
| 9Be (KED)   | 0.053 ppb             | 0.2 %             |
| 11B (KED)   | -14.881 ppb           | 1.7 %             |
| 24Mg (KED)  | 1,112.392 ppb         | 1.6 %             |
| 27Al (KED)  | 1,036.965 ppb         | 1.9 %             |
| 45Sc (KED)  | 123.392 %             | 0.6 %             |
| 51V (KED)   | 1.925 ppb             | 0.7 %             |
| 52Cr (KED)  | 2.379 ppb             | 0.8 %             |
| 55Mn (KED)  | 31.810 ppb            | 0.6 %             |
| 56Fe (KED)  | 1,150.606 ppb         | 0.6 %             |
| 58Ni (KED)  | 4.834 ppb             | 0.5 %             |
| 59Co (KED)  | 0.560 ppb             | 0.5 %             |
| 63Cu (KED)  | 10.684 ppb            | 0.9 %             |
| 64Zn (KED)  | 136.921 ppb           | 0.5 %             |
| 69Ga (KED)  | 2.557 ppb             | 1.7 %             |
| 75As (KED)  | 0.742 ppb             | 11.7 %            |
| 80Se (KED)  | -0.064 ppb            | 237.9 %           |
| 85Rb (KED)  | 2.580 ppb             | 5.5 %             |
| 88Sr (KED)  | 21.624 ppb            | 1.8 %             |
| 89Y (KED)   | 107.488 %             | 0.4 %             |
| 107Ag (KED) | 0.070 ppb             | 4.0 %             |
| 114Cd (KED) | 0.060 ppb             | 8.3 %             |
| 115In (KED) | 96.915 %              | 1.0 %             |
| 133Cs (KED) | 0.225 ppb             | 0.8 %             |
| 138Ba (KED) | 8.971 ppb             | 2.7 %             |
| 139La (KED) | 0.978 ppb             | 0.5 %             |
| 140Ce (KED) | 2.008 ppb             | 2.2 %             |
| 141Pr (KED) | 0.220 ppb             | 4.5 %             |
| 142Nd (KED) | 1.229 ppb             | 1.4 %             |
| 152Sm (KED) | 0.157 ppb             | 3.6 %             |
| 153Eu (KED) | 0.029 ppb             | 4.7 %             |
| 158Gd (KED) | 0.139 ppb             | 4.9 %             |
| 159Tb (KED) | 94.494 %              | 1.2 %             |
| 164Dy (KED) | 0.098 ppb             | 2.7 %             |
| 166Er (KED) | 0.052 ppb             | 5.9 %             |
| 169Tm (KED) | 0.006 ppb             | 3.8 %             |
| 174Yb (KED) | 0.037 ppb             | 6.1 %             |
| 175Lu (KED) | -0.008 ppb            | 49.2 %            |
| 205Tl (KED) | 0.019 ppb             | 4.3 %             |
| 208Pb (KED) | 1.545 ppb             | 0.2 %             |
| 209Bi (KED) | 76.583 %              | 0.2 %             |
| 232Th (KED) | 0.379 ppb             | 0.2 %             |
| 238U (KED)  | 0.097 ppb             | 2.0 %             |

| Category   | Concentration average | Intensity average | Intensity RSD |
|------------|-----------------------|-------------------|---------------|
| 6Li (KED)  | 112.048 %             | 2,780 cps         | 0.2 %         |
| 9Be (KED)  | 0.053 ppb             | 7 cps             | 0.0 %         |
| 11B (KED)  | -14.881 ppb           | 564 cps           | 3.0 %         |
| 24Mg (KED) | 1,112.392 ppb         | 530,236 cps       | 1.8 %         |
| 27Al (KED) | 1,036.965 ppb         | 130,393 cps       | 1.5 %         |

| Category    | Concentration average | Intensity average | Intensity RSD |
|-------------|-----------------------|-------------------|---------------|
| 45Sc (KED)  | 123.392 %             | 37,861 cps        | 0.6 %         |
| 51V (KED)   | 1.925 ppb             | 13,805 cps        | 1.0 %         |
| 52Cr (KED)  | 2.379 ppb             | 26,283 cps        | 0.8 %         |
| 55Mn (KED)  | 31.810 ppb            | 180,435 cps       | 0.4 %         |
| 56Fe (KED)  | 1,150.606 ppb         | 11,726,768 cps    | 1.0 %         |
| 58Ni (KED)  | 4.834 ppb             | 63,851 cps        | 0.9 %         |
| 59Co (KED)  | 0.560 ppb             | 12,217 cps        | 0.2 %         |
| 63Cu (KED)  | 10.684 ppb            | 150,194 cps       | 1.2 %         |
| 64Zn (KED)  | 136.921 ppb           | 496,692 cps       | 0.8 %         |
| 69Ga (KED)  | 2.557 ppb             | 12,219 cps        | 2.0 %         |
| 75As (KED)  | 0.742 ppb             | 810 cps           | 11.8 %        |
| 80Se (KED)  | -0.064 ppb            | 1,001 cps         | 5.3 %         |
| 85Rb (KED)  | 2.580 ppb             | 12,387 cps        | 5.5 %         |
| 88Sr (KED)  | 21.624 ppb            | 146,690 cps       | 2.2 %         |
| 89Y (KED)   | 107.488 %             | 318,285 cps       | 0.4 %         |
| 107Ag (KED) | 0.070 ppb             | 2,948 cps         | 4.6 %         |
| 114Cd (KED) | 0.060 ppb             | 954 cps           | 6.9 %         |
| 115In (KED) | 96.915 %              | 567,586 cps       | 1.0 %         |
| 133Cs (KED) | 0.225 ppb             | 5,329 cps         | 1.6 %         |
| 138Ba (KED) | 8.971 ppb             | 302,612 cps       | 2.2 %         |
| 139La (KED) | 0.978 ppb             | 69,600 cps        | 0.7 %         |
| 140Ce (KED) | 2.008 ppb             | 191,168 cps       | 1.0 %         |
| 141Pr (KED) | 0.220 ppb             | 22,407 cps        | 3.9 %         |
| 142Nd (KED) | 1.229 ppb             | 49,591 cps        | 0.3 %         |
| 152Sm (KED) | 0.157 ppb             | 6,091 cps         | 2.5 %         |
| 153Eu (KED) | 0.029 ppb             | 2,285 cps         | 4.7 %         |
| 158Gd (KED) | 0.139 ppb             | 7,451 cps         | 4.5 %         |
| 159Tb (KED) | 94.494 %              | 3,259,957 cps     | 1.2 %         |
| 164Dy (KED) | 0.098 ppb             | 5,908 cps         | 2.6 %         |
| 166Er (KED) | 0.052 ppb             | 3,973 cps         | 4.9 %         |
| 169Tm (KED) | 0.006 ppb             | 1,502 cps         | 3.7 %         |
| 174Yb (KED) | 0.037 ppb             | 3,276 cps         | 6.8 %         |
| 175Lu (KED) | -0.008 ppb            | 15,306 cps        | 3.2 %         |
| 205Tl (KED) | 0.019 ppb             | 2,884 cps         | 4.4 %         |
| 208Pb (KED) | 1.545 ppb             | 170,871 cps       | 0.4 %         |
| 209Bi (KED) | 76.583 %              | 2,537,072 cps     | 0.2 %         |
| 232Th (KED) | 0.379 ppb             | 83,140 cps        | 0.4 %         |
| 238U (KED)  | 0.097 ppb             | 25,386 cps        | 2.1 %         |

## Sample Summary

Instrument ID: iCAP Q

Analysis index: 12

Analysis name: 040261(0004)jian

Analysis started at: 9/28/2021 3:33:05 PM

User name: WINDOWS-UPCI4ER\Administrator

| Category    | Concentration average | Concentration RSD |
|-------------|-----------------------|-------------------|
| 6Li (KED)   | 110.480 %             | 3.7 %             |
| 9Be (KED)   | 0.090 ppb             | 72.4 %            |
| 11B (KED)   | -16.280 ppb           | 4.2 %             |
| 24Mg (KED)  | 1,242.239 ppb         | 3.1 %             |
| 27Al (KED)  | 1,261.607 ppb         | 1.5 %             |
| 45Sc (KED)  | 128.299 %             | 1.8 %             |
| 51V (KED)   | 2.251 ppb             | 1.4 %             |
| 52Cr (KED)  | 2.474 ppb             | 3.2 %             |
| 55Mn (KED)  | 31.924 ppb            | 1.3 %             |
| 56Fe (KED)  | 1,260.534 ppb         | 0.5 %             |
| 58Ni (KED)  | 5.388 ppb             | 0.8 %             |
| 59Co (KED)  | 0.609 ppb             | 2.8 %             |
| 63Cu (KED)  | 10.550 ppb            | 0.9 %             |
| 64Zn (KED)  | 131.688 ppb           | 2.4 %             |
| 69Ga (KED)  | 2.645 ppb             | 2.6 %             |
| 75As (KED)  | 0.725 ppb             | 2.2 %             |
| 80Se (KED)  | 0.353 ppb             | 61.8 %            |
| 85Rb (KED)  | 3.167 ppb             | 1.6 %             |
| 88Sr (KED)  | 20.485 ppb            | 1.6 %             |
| 89Y (KED)   | 110.759 %             | 1.2 %             |
| 107Ag (KED) | 0.083 ppb             | 1.7 %             |
| 114Cd (KED) | 0.067 ppb             | 6.6 %             |
| 115In (KED) | 95.794 %              | 2.5 %             |
| 133Cs (KED) | 0.263 ppb             | 5.8 %             |
| 138Ba (KED) | 9.139 ppb             | 2.7 %             |
| 139La (KED) | 0.959 ppb             | 2.7 %             |
| 140Ce (KED) | 2.039 ppb             | 2.6 %             |
| 141Pr (KED) | 0.227 ppb             | 2.2 %             |
| 142Nd (KED) | 1.273 ppb             | 2.1 %             |
| 152Sm (KED) | 0.181 ppb             | 3.1 %             |
| 153Eu (KED) | 0.035 ppb             | 3.7 %             |
| 158Gd (KED) | 0.154 ppb             | 4.1 %             |
| 159Tb (KED) | 93.839 %              | 1.8 %             |
| 164Dy (KED) | 0.113 ppb             | 2.2 %             |
| 166Er (KED) | 0.056 ppb             | 2.9 %             |
| 169Tm (KED) | 0.007 ppb             | 9.8 %             |
| 174Yb (KED) | 0.041 ppb             | 2.1 %             |
| 175Lu (KED) | -0.006 ppb            | 79.1 %            |
| 205Tl (KED) | 0.021 ppb             | 4.3 %             |
| 208Pb (KED) | 1.454 ppb             | 2.4 %             |
| 209Bi (KED) | 76.012 %              | 1.3 %             |
| 232Th (KED) | 0.394 ppb             | 1.7 %             |
| 238U (KED)  | 0.105 ppb             | 2.1 %             |

| Category   | Concentration average | Intensity average | Intensity RSD |
|------------|-----------------------|-------------------|---------------|
| 6Li (KED)  | 110.480 %             | 2,741 cps         | 3.7 %         |
| 9Be (KED)  | 0.090 ppb             | 11 cps            | 69.3 %        |
| 11B (KED)  | -16.280 ppb           | 468 cps           | 6.8 %         |
| 24Mg (KED) | 1,242.239 ppb         | 583,387 cps       | 0.8 %         |
| 27Al (KED) | 1,261.607 ppb         | 164,919 cps       | 1.2 %         |

| Category    | Concentration average | Intensity average | Intensity RSD |
|-------------|-----------------------|-------------------|---------------|
| 45Sc (KED)  | 128.299 %             | 39,366 cps        | 1.8 %         |
| 51V (KED)   | 2.251 ppb             | 16,777 cps        | 0.4 %         |
| 52Cr (KED)  | 2.474 ppb             | 28,412 cps        | 2.2 %         |
| 55Mn (KED)  | 31.924 ppb            | 188,271 cps       | 1.6 %         |
| 56Fe (KED)  | 1,260.534 ppb         | 13,357,221 cps    | 1.6 %         |
| 58Ni (KED)  | 5.388 ppb             | 73,682 cps        | 1.1 %         |
| 59Co (KED)  | 0.609 ppb             | 13,804 cps        | 1.0 %         |
| 63Cu (KED)  | 10.550 ppb            | 152,838 cps       | 1.7 %         |
| 64Zn (KED)  | 131.688 ppb           | 492,214 cps       | 2.0 %         |
| 69Ga (KED)  | 2.645 ppb             | 13,023 cps        | 2.0 %         |
| 75As (KED)  | 0.725 ppb             | 816 cps           | 3.4 %         |
| 80Se (KED)  | 0.353 ppb             | 1,172 cps         | 6.5 %         |
| 85Rb (KED)  | 3.167 ppb             | 15,669 cps        | 1.9 %         |
| 88Sr (KED)  | 20.485 ppb            | 143,182 cps       | 1.6 %         |
| 89Y (KED)   | 110.759 %             | 327,971 cps       | 1.2 %         |
| 107Ag (KED) | 0.083 ppb             | 3,419 cps         | 1.7 %         |
| 114Cd (KED) | 0.067 ppb             | 1,054 cps         | 3.9 %         |
| 115In (KED) | 95.794 %              | 561,021 cps       | 2.5 %         |
| 133Cs (KED) | 0.263 ppb             | 6,146 cps         | 4.2 %         |
| 138Ba (KED) | 9.139 ppb             | 306,090 cps       | 1.5 %         |
| 139La (KED) | 0.959 ppb             | 67,750 cps        | 1.0 %         |
| 140Ce (KED) | 2.039 ppb             | 192,796 cps       | 1.4 %         |
| 141Pr (KED) | 0.227 ppb             | 22,979 cps        | 1.7 %         |
| 142Nd (KED) | 1.273 ppb             | 51,032 cps        | 2.1 %         |
| 152Sm (KED) | 0.181 ppb             | 6,933 cps         | 1.4 %         |
| 153Eu (KED) | 0.035 ppb             | 2,706 cps         | 3.1 %         |
| 158Gd (KED) | 0.154 ppb             | 8,227 cps         | 2.4 %         |
| 159Tb (KED) | 93.839 %              | 3,237,345 cps     | 1.8 %         |
| 164Dy (KED) | 0.113 ppb             | 6,715 cps         | 0.6 %         |
| 166Er (KED) | 0.056 ppb             | 4,254 cps         | 1.1 %         |
| 169Tm (KED) | 0.007 ppb             | 1,712 cps         | 8.7 %         |
| 174Yb (KED) | 0.041 ppb             | 3,616 cps         | 2.5 %         |
| 175Lu (KED) | -0.006 ppb            | 15,426 cps        | 2.7 %         |
| 205Tl (KED) | 0.021 ppb             | 3,259 cps         | 3.4 %         |
| 208Pb (KED) | 1.454 ppb             | 160,207 cps       | 1.6 %         |
| 209Bi (KED) | 76.012 %              | 2,518,143 cps     | 1.3 %         |
| 232Th (KED) | 0.394 ppb             | 85,814 cps        | 1.7 %         |
| 238U (KED)  | 0.105 ppb             | 27,121 cps        | 0.8 %         |

## Sample Summary

Instrument ID: iCAP Q

Analysis index: 13

Analysis name: 047134(00010)jian

Analysis started at: 9/28/2021 3:36:37 PM

User name: WINDOWS-UPCI4ER\Administrator

| Category    | Concentration average | Concentration RSD |
|-------------|-----------------------|-------------------|
| 6Li (KED)   | 110.704 %             | 1.7 %             |
| 9Be (KED)   | 0.063 ppb             | 89.7 %            |
| 11B (KED)   | -14.521 ppb           | 6.4 %             |
| 24Mg (KED)  | 1,209.118 ppb         | 2.6 %             |
| 27Al (KED)  | 1,294.067 ppb         | 2.4 %             |
| 45Sc (KED)  | 127.293 %             | 1.7 %             |
| 51V (KED)   | 2.423 ppb             | 1.7 %             |
| 52Cr (KED)  | 2.796 ppb             | 2.3 %             |
| 55Mn (KED)  | 35.598 ppb            | 3.0 %             |
| 56Fe (KED)  | 1,535.077 ppb         | 0.4 %             |
| 58Ni (KED)  | 6.297 ppb             | 0.8 %             |
| 59Co (KED)  | 0.666 ppb             | 2.2 %             |
| 63Cu (KED)  | 10.601 ppb            | 1.0 %             |
| 64Zn (KED)  | 146.254 ppb           | 1.0 %             |
| 69Ga (KED)  | 2.830 ppb             | 2.3 %             |
| 75As (KED)  | 0.859 ppb             | 4.0 %             |
| 80Se (KED)  | 0.281 ppb             | 46.4 %            |
| 85Rb (KED)  | 3.194 ppb             | 2.7 %             |
| 88Sr (KED)  | 20.139 ppb            | 0.2 %             |
| 89Y (KED)   | 113.329 %             | 1.2 %             |
| 107Ag (KED) | 0.075 ppb             | 5.5 %             |
| 114Cd (KED) | 0.052 ppb             | 7.9 %             |
| 115In (KED) | 97.535 %              | 0.6 %             |
| 133Cs (KED) | 0.283 ppb             | 1.4 %             |
| 138Ba (KED) | 9.805 ppb             | 1.8 %             |
| 139La (KED) | 1.135 ppb             | 1.2 %             |
| 140Ce (KED) | 2.352 ppb             | 2.6 %             |
| 141Pr (KED) | 0.267 ppb             | 0.3 %             |
| 142Nd (KED) | 1.434 ppb             | 1.5 %             |
| 152Sm (KED) | 0.202 ppb             | 4.9 %             |
| 153Eu (KED) | 0.039 ppb             | 2.4 %             |
| 158Gd (KED) | 0.178 ppb             | 3.2 %             |
| 159Tb (KED) | 94.919 %              | 1.0 %             |
| 164Dy (KED) | 0.127 ppb             | 2.2 %             |
| 166Er (KED) | 0.063 ppb             | 3.1 %             |
| 169Tm (KED) | 0.008 ppb             | 0.6 %             |
| 174Yb (KED) | 0.047 ppb             | 1.1 %             |
| 175Lu (KED) | -0.005 ppb            | 146.9 %           |
| 205Tl (KED) | 0.020 ppb             | 7.0 %             |
| 208Pb (KED) | 1.809 ppb             | 2.6 %             |
| 209Bi (KED) | 77.048 %              | 2.8 %             |
| 232Th (KED) | 0.457 ppb             | 1.9 %             |
| 238U (KED)  | 0.113 ppb             | 1.1 %             |

| Category   | Concentration average | Intensity average | Intensity RSD |
|------------|-----------------------|-------------------|---------------|
| 6Li (KED)  | 110.704 %             | 2,747 cps         | 1.7 %         |
| 9Be (KED)  | 0.063 ppb             | 8 cps             | 89.2 %        |
| 11B (KED)  | -14.521 ppb           | 580 cps           | 9.4 %         |
| 24Mg (KED) | 1,209.118 ppb         | 569,265 cps       | 1.5 %         |
| 27Al (KED) | 1,294.067 ppb         | 167,814 cps       | 1.0 %         |

| Category    | Concentration average | Intensity average | Intensity RSD |
|-------------|-----------------------|-------------------|---------------|
| 45Sc (KED)  | 127.293 %             | 39,058 cps        | 1.7 %         |
| 51V (KED)   | 2.423 ppb             | 17,917 cps        | 0.1 %         |
| 52Cr (KED)  | 2.796 ppb             | 31,841 cps        | 1.2 %         |
| 55Mn (KED)  | 35.598 ppb            | 208,241 cps       | 1.6 %         |
| 56Fe (KED)  | 1,535.077 ppb         | 16,138,690 cps    | 1.6 %         |
| 58Ni (KED)  | 6.297 ppb             | 85,006 cps        | 1.3 %         |
| 59Co (KED)  | 0.666 ppb             | 14,969 cps        | 2.1 %         |
| 63Cu (KED)  | 10.601 ppb            | 157,118 cps       | 0.4 %         |
| 64Zn (KED)  | 146.254 ppb           | 559,326 cps       | 1.6 %         |
| 69Ga (KED)  | 2.830 ppb             | 14,258 cps        | 1.3 %         |
| 75As (KED)  | 0.859 ppb             | 987 cps           | 3.6 %         |
| 80Se (KED)  | 0.281 ppb             | 1,175 cps         | 3.4 %         |
| 85Rb (KED)  | 3.194 ppb             | 16,169 cps        | 3.5 %         |
| 88Sr (KED)  | 20.139 ppb            | 144,038 cps       | 1.1 %         |
| 89Y (KED)   | 113.329 %             | 335,580 cps       | 1.2 %         |
| 107Ag (KED) | 0.075 ppb             | 3,175 cps         | 5.1 %         |
| 114Cd (KED) | 0.052 ppb             | 837 cps           | 7.9 %         |
| 115In (KED) | 97.535 %              | 571,220 cps       | 0.6 %         |
| 133Cs (KED) | 0.283 ppb             | 6,718 cps         | 0.9 %         |
| 138Ba (KED) | 9.805 ppb             | 332,176 cps       | 1.1 %         |
| 139La (KED) | 1.135 ppb             | 81,096 cps        | 0.2 %         |
| 140Ce (KED) | 2.352 ppb             | 224,872 cps       | 1.7 %         |
| 141Pr (KED) | 0.267 ppb             | 27,352 cps        | 0.7 %         |
| 142Nd (KED) | 1.434 ppb             | 58,144 cps        | 0.5 %         |
| 152Sm (KED) | 0.202 ppb             | 7,867 cps         | 4.2 %         |
| 153Eu (KED) | 0.039 ppb             | 3,057 cps         | 1.6 %         |
| 158Gd (KED) | 0.178 ppb             | 9,606 cps         | 3.1 %         |
| 159Tb (KED) | 94.919 %              | 3,274,599 cps     | 1.0 %         |
| 164Dy (KED) | 0.127 ppb             | 7,631 cps         | 1.5 %         |
| 166Er (KED) | 0.063 ppb             | 4,821 cps         | 2.1 %         |
| 169Tm (KED) | 0.008 ppb             | 1,971 cps         | 0.5 %         |
| 174Yb (KED) | 0.047 ppb             | 4,212 cps         | 1.4 %         |
| 175Lu (KED) | -0.005 ppb            | 15,765 cps        | 5.7 %         |
| 205Tl (KED) | 0.020 ppb             | 3,089 cps         | 7.5 %         |
| 208Pb (KED) | 1.809 ppb             | 199,412 cps       | 2.3 %         |
| 209Bi (KED) | 77.048 %              | 2,552,464 cps     | 2.8 %         |
| 232Th (KED) | 0.457 ppb             | 100,828 cps       | 1.1 %         |
| 238U (KED)  | 0.113 ppb             | 29,657 cps        | 1.8 %         |

## Sample Summary

Instrument ID: iCAP Q

Analysis index: 14

Analysis name: 00014(105)jian

Analysis started at: 9/28/2021 3:39:57 PM

User name: WINDOWS-UPCI4ER\Administrator

| Category    | Concentration average | Concentration RSD |
|-------------|-----------------------|-------------------|
| 6Li (KED)   | 115.138 %             | 0.3 %             |
| 9Be (KED)   | 0.034 ppb             | 43.5 %            |
| 11B (KED)   | -15.170 ppb           | 1.5 %             |
| 24Mg (KED)  | 894.439 ppb           | 0.7 %             |
| 27Al (KED)  | 917.983 ppb           | 1.0 %             |
| 45Sc (KED)  | 126.687 %             | 1.6 %             |
| 51V (KED)   | 1.638 ppb             | 2.4 %             |
| 52Cr (KED)  | 2.780 ppb             | 1.1 %             |
| 55Mn (KED)  | 23.835 ppb            | 1.6 %             |
| 56Fe (KED)  | 912.185 ppb           | 1.1 %             |
| 58Ni (KED)  | 3.978 ppb             | 1.5 %             |
| 59Co (KED)  | 0.435 ppb             | 1.6 %             |
| 63Cu (KED)  | 9.978 ppb             | 1.6 %             |
| 64Zn (KED)  | 140.914 ppb           | 1.0 %             |
| 69Ga (KED)  | 2.587 ppb             | 0.4 %             |
| 75As (KED)  | 0.667 ppb             | 0.8 %             |
| 80Se (KED)  | 0.170 ppb             | 103.5 %           |
| 85Rb (KED)  | 2.259 ppb             | 1.9 %             |
| 88Sr (KED)  | 14.859 ppb            | 0.4 %             |
| 89Y (KED)   | 111.618 %             | 0.8 %             |
| 107Ag (KED) | 0.068 ppb             | 6.3 %             |
| 114Cd (KED) | 0.056 ppb             | 7.3 %             |
| 115In (KED) | 100.136 %             | 1.9 %             |
| 133Cs (KED) | 0.187 ppb             | 1.4 %             |
| 138Ba (KED) | 9.574 ppb             | 2.5 %             |
| 139La (KED) | 0.700 ppb             | 3.2 %             |
| 140Ce (KED) | 1.520 ppb             | 2.4 %             |
| 141Pr (KED) | 0.172 ppb             | 3.5 %             |
| 142Nd (KED) | 0.940 ppb             | 2.4 %             |
| 152Sm (KED) | 0.133 ppb             | 5.2 %             |
| 153Eu (KED) | 0.026 ppb             | 6.6 %             |
| 158Gd (KED) | 0.114 ppb             | 1.2 %             |
| 159Tb (KED) | 96.190 %              | 2.7 %             |
| 164Dy (KED) | 0.083 ppb             | 2.3 %             |
| 166Er (KED) | 0.038 ppb             | 3.5 %             |
| 169Tm (KED) | 0.005 ppb             | 7.7 %             |
| 174Yb (KED) | 0.030 ppb             | 6.5 %             |
| 175Lu (KED) | -0.007 ppb            | 90.3 %            |
| 205Tl (KED) | 0.016 ppb             | 3.7 %             |
| 208Pb (KED) | 1.410 ppb             | 1.4 %             |
| 209Bi (KED) | 80.540 %              | 1.1 %             |
| 232Th (KED) | 0.306 ppb             | 1.3 %             |
| 238U (KED)  | 0.079 ppb             | 1.2 %             |

| Category   | Concentration average | Intensity average | Intensity RSD |
|------------|-----------------------|-------------------|---------------|
| 6Li (KED)  | 115.138 %             | 2,857 cps         | 0.3 %         |
| 9Be (KED)  | 0.034 ppb             | 4 cps             | 43.3 %        |
| 11B (KED)  | -15.170 ppb           | 561 cps           | 2.9 %         |
| 24Mg (KED) | 894.439 ppb           | 438,114 cps       | 0.4 %         |
| 27Al (KED) | 917.983 ppb           | 118,515 cps       | 0.5 %         |

| Category    | Concentration average | Intensity average | Intensity RSD |
|-------------|-----------------------|-------------------|---------------|
| 45Sc (KED)  | 126.687 %             | 38,872 cps        | 1.6 %         |
| 51V (KED)   | 1.638 ppb             | 12,055 cps        | 0.9 %         |
| 52Cr (KED)  | 2.780 ppb             | 31,510 cps        | 1.5 %         |
| 55Mn (KED)  | 23.835 ppb            | 138,797 cps       | 0.1 %         |
| 56Fe (KED)  | 912.185 ppb           | 9,544,472 cps     | 0.8 %         |
| 58Ni (KED)  | 3.978 ppb             | 54,389 cps        | 1.1 %         |
| 59Co (KED)  | 0.435 ppb             | 9,753 cps         | 1.8 %         |
| 63Cu (KED)  | 9.978 ppb             | 145,690 cps       | 1.1 %         |
| 64Zn (KED)  | 140.914 ppb           | 530,771 cps       | 0.5 %         |
| 69Ga (KED)  | 2.587 ppb             | 12,840 cps        | 0.4 %         |
| 75As (KED)  | 0.667 ppb             | 757 cps           | 1.5 %         |
| 80Se (KED)  | 0.170 ppb             | 1,119 cps         | 4.7 %         |
| 85Rb (KED)  | 2.259 ppb             | 11,270 cps        | 2.7 %         |
| 88Sr (KED)  | 14.859 ppb            | 104,700 cps       | 1.1 %         |
| 89Y (KED)   | 111.618 %             | 330,513 cps       | 0.8 %         |
| 107Ag (KED) | 0.068 ppb             | 2,928 cps         | 4.3 %         |
| 114Cd (KED) | 0.056 ppb             | 922 cps           | 6.2 %         |
| 115In (KED) | 100.136 %             | 586,450 cps       | 1.9 %         |
| 133Cs (KED) | 0.187 ppb             | 4,560 cps         | 1.6 %         |
| 138Ba (KED) | 9.574 ppb             | 328,605 cps       | 1.1 %         |
| 139La (KED) | 0.700 ppb             | 50,710 cps        | 1.1 %         |
| 140Ce (KED) | 1.520 ppb             | 147,305 cps       | 0.4 %         |
| 141Pr (KED) | 0.172 ppb             | 17,881 cps        | 1.2 %         |
| 142Nd (KED) | 0.940 ppb             | 38,612 cps        | 0.5 %         |
| 152Sm (KED) | 0.133 ppb             | 5,232 cps         | 5.7 %         |
| 153Eu (KED) | 0.026 ppb             | 2,050 cps         | 3.9 %         |
| 158Gd (KED) | 0.114 ppb             | 6,209 cps         | 1.5 %         |
| 159Tb (KED) | 96.190 %              | 3,318,442 cps     | 2.7 %         |
| 164Dy (KED) | 0.083 ppb             | 5,071 cps         | 2.6 %         |
| 166Er (KED) | 0.038 ppb             | 3,050 cps         | 1.2 %         |
| 169Tm (KED) | 0.005 ppb             | 1,277 cps         | 9.4 %         |
| 174Yb (KED) | 0.030 ppb             | 2,724 cps         | 3.8 %         |
| 175Lu (KED) | -0.007 ppb            | 15,634 cps        | 4.1 %         |
| 205Tl (KED) | 0.016 ppb             | 2,577 cps         | 2.8 %         |
| 208Pb (KED) | 1.410 ppb             | 164,961 cps       | 1.5 %         |
| 209Bi (KED) | 80.540 %              | 2,668,164 cps     | 1.1 %         |
| 232Th (KED) | 0.306 ppb             | 70,731 cps        | 1.8 %         |
| 238U (KED)  | 0.079 ppb             | 21,727 cps        | 2.2 %         |

## Sample Summary

Instrument ID: iCAP Q

Analysis index: 15

Analysis name: 032367(0002)jian

Analysis started at: 9/28/2021 3:43:49 PM

User name: WINDOWS-UPCI4ER\Administrator

| Category    | Concentration average | Concentration RSD |
|-------------|-----------------------|-------------------|
| 6Li (KED)   | 114.735 %             | 1.7 %             |
| 9Be (KED)   | 0.034 ppb             | 43.8 %            |
| 11B (KED)   | -13.942 ppb           | 3.2 %             |
| 24Mg (KED)  | 1,222.813 ppb         | 1.9 %             |
| 27Al (KED)  | 1,200.967 ppb         | 1.8 %             |
| 45Sc (KED)  | 124.576 %             | 1.1 %             |
| 51V (KED)   | 2.306 ppb             | 1.4 %             |
| 52Cr (KED)  | 2.575 ppb             | 2.1 %             |
| 55Mn (KED)  | 34.602 ppb            | 1.9 %             |
| 56Fe (KED)  | 1,464.459 ppb         | 2.2 %             |
| 58Ni (KED)  | 6.192 ppb             | 0.8 %             |
| 59Co (KED)  | 0.647 ppb             | 1.7 %             |
| 63Cu (KED)  | 10.453 ppb            | 0.9 %             |
| 64Zn (KED)  | 140.017 ppb           | 2.4 %             |
| 69Ga (KED)  | 2.623 ppb             | 1.5 %             |
| 75As (KED)  | 0.943 ppb             | 10.8 %            |
| 80Se (KED)  | 0.108 ppb             | 216.4 %           |
| 85Rb (KED)  | 2.746 ppb             | 3.4 %             |
| 88Sr (KED)  | 24.736 ppb            | 1.5 %             |
| 89Y (KED)   | 111.916 %             | 1.6 %             |
| 107Ag (KED) | 0.054 ppb             | 2.4 %             |
| 114Cd (KED) | 0.054 ppb             | 6.2 %             |
| 115In (KED) | 97.017 %              | 2.6 %             |
| 133Cs (KED) | 0.279 ppb             | 1.5 %             |
| 138Ba (KED) | 9.574 ppb             | 1.7 %             |
| 139La (KED) | 1.100 ppb             | 1.6 %             |
| 140Ce (KED) | 2.291 ppb             | 1.0 %             |
| 141Pr (KED) | 0.264 ppb             | 2.3 %             |
| 142Nd (KED) | 1.422 ppb             | 0.7 %             |
| 152Sm (KED) | 0.198 ppb             | 1.3 %             |
| 153Eu (KED) | 0.039 ppb             | 3.7 %             |
| 158Gd (KED) | 0.176 ppb             | 1.4 %             |
| 159Tb (KED) | 97.105 %              | 0.7 %             |
| 164Dy (KED) | 0.124 ppb             | 2.2 %             |
| 166Er (KED) | 0.061 ppb             | 3.7 %             |
| 169Tm (KED) | 0.007 ppb             | 0.6 %             |
| 174Yb (KED) | 0.045 ppb             | 2.8 %             |
| 175Lu (KED) | -0.007 ppb            | 18.0 %            |
| 205Tl (KED) | 0.019 ppb             | 3.7 %             |
| 208Pb (KED) | 1.439 ppb             | 2.4 %             |
| 209Bi (KED) | 80.112 %              | 2.2 %             |
| 232Th (KED) | 0.434 ppb             | 3.6 %             |
| 238U (KED)  | 0.110 ppb             | 4.6 %             |

| Category   | Concentration average | Intensity average | Intensity RSD |
|------------|-----------------------|-------------------|---------------|
| 6Li (KED)  | 114.735 %             | 2,847 cps         | 1.7 %         |
| 9Be (KED)  | 0.034 ppb             | 4 cps             | 43.3 %        |
| 11B (KED)  | -13.942 ppb           | 639 cps           | 2.9 %         |
| 24Mg (KED) | 1,222.813 ppb         | 596,699 cps       | 0.3 %         |
| 27Al (KED) | 1,200.967 ppb         | 152,442 cps       | 0.9 %         |

| Category    | Concentration average | Intensity average | Intensity RSD |
|-------------|-----------------------|-------------------|---------------|
| 45Sc (KED)  | 124.576 %             | 38,224 cps        | 1.1 %         |
| 51V (KED)   | 2.306 ppb             | 16,691 cps        | 0.8 %         |
| 52Cr (KED)  | 2.575 ppb             | 28,705 cps        | 1.8 %         |
| 55Mn (KED)  | 34.602 ppb            | 198,129 cps       | 0.8 %         |
| 56Fe (KED)  | 1,464.459 ppb         | 15,066,726 cps    | 2.0 %         |
| 58Ni (KED)  | 6.192 ppb             | 81,859 cps        | 1.3 %         |
| 59Co (KED)  | 0.647 ppb             | 14,227 cps        | 0.7 %         |
| 63Cu (KED)  | 10.453 ppb            | 153,006 cps       | 0.7 %         |
| 64Zn (KED)  | 140.017 ppb           | 528,699 cps       | 1.0 %         |
| 69Ga (KED)  | 2.623 ppb             | 13,055 cps        | 2.1 %         |
| 75As (KED)  | 0.943 ppb             | 1,068 cps         | 9.3 %         |
| 80Se (KED)  | 0.108 ppb             | 1,100 cps         | 5.8 %         |
| 85Rb (KED)  | 2.746 ppb             | 13,726 cps        | 1.8 %         |
| 88Sr (KED)  | 24.736 ppb            | 174,664 cps       | 0.6 %         |
| 89Y (KED)   | 111.916 %             | 331,397 cps       | 1.6 %         |
| 107Ag (KED) | 0.054 ppb             | 2,292 cps         | 0.4 %         |
| 114Cd (KED) | 0.054 ppb             | 871 cps           | 4.1 %         |
| 115In (KED) | 97.017 %              | 568,186 cps       | 2.6 %         |
| 133Cs (KED) | 0.279 ppb             | 6,595 cps         | 2.7 %         |
| 138Ba (KED) | 9.574 ppb             | 331,834 cps       | 1.1 %         |
| 139La (KED) | 1.100 ppb             | 80,437 cps        | 1.6 %         |
| 140Ce (KED) | 2.291 ppb             | 224,198 cps       | 0.9 %         |
| 141Pr (KED) | 0.264 ppb             | 27,673 cps        | 2.6 %         |
| 142Nd (KED) | 1.422 ppb             | 58,978 cps        | 1.3 %         |
| 152Sm (KED) | 0.198 ppb             | 7,880 cps         | 0.7 %         |
| 153Eu (KED) | 0.039 ppb             | 3,125 cps         | 3.7 %         |
| 158Gd (KED) | 0.176 ppb             | 9,715 cps         | 1.6 %         |
| 159Tb (KED) | 97.105 %              | 3,350,013 cps     | 0.7 %         |
| 164Dy (KED) | 0.124 ppb             | 7,617 cps         | 2.6 %         |
| 166Er (KED) | 0.061 ppb             | 4,755 cps         | 2.9 %         |
| 169Tm (KED) | 0.007 ppb             | 1,895 cps         | 1.2 %         |
| 174Yb (KED) | 0.045 ppb             | 4,080 cps         | 2.3 %         |
| 175Lu (KED) | -0.007 ppb            | 15,827 cps        | 0.7 %         |
| 205Tl (KED) | 0.019 ppb             | 3,009 cps         | 2.2 %         |
| 208Pb (KED) | 1.439 ppb             | 167,151 cps       | 1.5 %         |
| 209Bi (KED) | 80.112 %              | 2,653,981 cps     | 2.2 %         |
| 232Th (KED) | 0.434 ppb             | 99,621 cps        | 2.3 %         |
| 238U (KED)  | 0.110 ppb             | 29,913 cps        | 2.8 %         |

## Sample Summary

Instrument ID: iCAP Q

Analysis index: 16

Analysis name: 047248(0006)jian

Analysis started at: 9/28/2021 3:47:15 PM

User name: WINDOWS-UPCI4ER\Administrator

| Category    | Concentration average | Concentration RSD |
|-------------|-----------------------|-------------------|
| 6Li (KED)   | 114.108 %             | 1.2 %             |
| 9Be (KED)   | 0.095 ppb             | 41.9 %            |
| 11B (KED)   | -18.273 ppb           | 3.5 %             |
| 24Mg (KED)  | 847.206 ppb           | 2.9 %             |
| 27Al (KED)  | 1,121.270 ppb         | 0.9 %             |
| 45Sc (KED)  | 125.775 %             | 0.3 %             |
| 51V (KED)   | 2.089 ppb             | 0.8 %             |
| 52Cr (KED)  | 2.184 ppb             | 1.5 %             |
| 55Mn (KED)  | 26.054 ppb            | 1.1 %             |
| 56Fe (KED)  | 1,232.651 ppb         | 0.3 %             |
| 58Ni (KED)  | 5.047 ppb             | 0.8 %             |
| 59Co (KED)  | 0.497 ppb             | 0.5 %             |
| 63Cu (KED)  | 9.527 ppb             | 1.0 %             |
| 64Zn (KED)  | 138.427 ppb           | 1.2 %             |
| 69Ga (KED)  | 2.348 ppb             | 1.8 %             |
| 75As (KED)  | 0.799 ppb             | 7.1 %             |
| 80Se (KED)  | 0.586 ppb             | 31.5 %            |
| 85Rb (KED)  | 4.164 ppb             | 0.9 %             |
| 88Sr (KED)  | 13.928 ppb            | 2.3 %             |
| 89Y (KED)   | 110.364 %             | 0.5 %             |
| 107Ag (KED) | 0.050 ppb             | 2.3 %             |
| 114Cd (KED) | 0.083 ppb             | 3.5 %             |
| 115In (KED) | 98.498 %              | 0.6 %             |
| 133Cs (KED) | 0.240 ppb             | 1.4 %             |
| 138Ba (KED) | 8.477 ppb             | 1.8 %             |
| 139La (KED) | 1.043 ppb             | 1.1 %             |
| 140Ce (KED) | 2.251 ppb             | 2.4 %             |
| 141Pr (KED) | 0.252 ppb             | 1.9 %             |
| 142Nd (KED) | 1.351 ppb             | 0.6 %             |
| 152Sm (KED) | 0.180 ppb             | 3.4 %             |
| 153Eu (KED) | 0.034 ppb             | 5.3 %             |
| 158Gd (KED) | 0.156 ppb             | 0.6 %             |
| 159Tb (KED) | 95.553 %              | 1.6 %             |
| 164Dy (KED) | 0.105 ppb             | 2.1 %             |
| 166Er (KED) | 0.050 ppb             | 2.0 %             |
| 169Tm (KED) | 0.006 ppb             | 5.5 %             |
| 174Yb (KED) | 0.039 ppb             | 2.9 %             |
| 175Lu (KED) | -0.007 ppb            | 22.6 %            |
| 205Tl (KED) | 0.018 ppb             | 2.0 %             |
| 208Pb (KED) | 1.243 ppb             | 2.1 %             |
| 209Bi (KED) | 80.147 %              | 0.2 %             |
| 232Th (KED) | 0.416 ppb             | 1.7 %             |
| 238U (KED)  | 0.090 ppb             | 2.0 %             |

| Category   | Concentration average | Intensity average | Intensity RSD |
|------------|-----------------------|-------------------|---------------|
| 6Li (KED)  | 114.108 %             | 2,831 cps         | 1.2 %         |
| 9Be (KED)  | 0.095 ppb             | 12 cps            | 41.7 %        |
| 11B (KED)  | -18.273 ppb           | 354 cps           | 10.7 %        |
| 24Mg (KED) | 847.206 ppb           | 411,183 cps       | 1.8 %         |
| 27Al (KED) | 1,121.270 ppb         | 143,720 cps       | 1.2 %         |

| Category    | Concentration average | Intensity average | Intensity RSD |
|-------------|-----------------------|-------------------|---------------|
| 45Sc (KED)  | 125.775 %             | 38,592 cps        | 0.3 %         |
| 51V (KED)   | 2.089 ppb             | 15,264 cps        | 1.1 %         |
| 52Cr (KED)  | 2.184 ppb             | 24,605 cps        | 1.6 %         |
| 55Mn (KED)  | 26.054 ppb            | 150,653 cps       | 1.4 %         |
| 56Fe (KED)  | 1,232.651 ppb         | 12,805,100 cps    | 0.1 %         |
| 58Ni (KED)  | 5.047 ppb             | 67,827 cps        | 0.6 %         |
| 59Co (KED)  | 0.497 ppb             | 11,062 cps        | 0.8 %         |
| 63Cu (KED)  | 9.527 ppb             | 137,575 cps       | 0.9 %         |
| 64Zn (KED)  | 138.427 ppb           | 515,563 cps       | 0.8 %         |
| 69Ga (KED)  | 2.348 ppb             | 11,524 cps        | 2.1 %         |
| 75As (KED)  | 0.799 ppb             | 894 cps           | 6.9 %         |
| 80Se (KED)  | 0.586 ppb             | 1,247 cps         | 4.9 %         |
| 85Rb (KED)  | 4.164 ppb             | 20,526 cps        | 1.4 %         |
| 88Sr (KED)  | 13.928 ppb            | 97,032 cps        | 1.9 %         |
| 89Y (KED)   | 110.364 %             | 326,800 cps       | 0.5 %         |
| 107Ag (KED) | 0.050 ppb             | 2,137 cps         | 2.0 %         |
| 114Cd (KED) | 0.083 ppb             | 1,326 cps         | 3.2 %         |
| 115In (KED) | 98.498 %              | 576,859 cps       | 0.6 %         |
| 133Cs (KED) | 0.240 ppb             | 5,772 cps         | 1.2 %         |
| 138Ba (KED) | 8.477 ppb             | 289,197 cps       | 1.5 %         |
| 139La (KED) | 1.043 ppb             | 75,026 cps        | 1.5 %         |
| 140Ce (KED) | 2.251 ppb             | 216,702 cps       | 2.7 %         |
| 141Pr (KED) | 0.252 ppb             | 26,025 cps        | 3.5 %         |
| 142Nd (KED) | 1.351 ppb             | 55,144 cps        | 1.1 %         |
| 152Sm (KED) | 0.180 ppb             | 7,041 cps         | 2.2 %         |
| 153Eu (KED) | 0.034 ppb             | 2,705 cps         | 4.1 %         |
| 158Gd (KED) | 0.156 ppb             | 8,460 cps         | 1.4 %         |
| 159Tb (KED) | 95.553 %              | 3,296,479 cps     | 1.6 %         |
| 164Dy (KED) | 0.105 ppb             | 6,393 cps         | 3.7 %         |
| 166Er (KED) | 0.050 ppb             | 3,922 cps         | 3.2 %         |
| 169Tm (KED) | 0.006 ppb             | 1,502 cps         | 4.6 %         |
| 174Yb (KED) | 0.039 ppb             | 3,500 cps         | 1.3 %         |
| 175Lu (KED) | -0.007 ppb            | 15,568 cps        | 2.5 %         |
| 205Tl (KED) | 0.018 ppb             | 2,821 cps         | 2.1 %         |
| 208Pb (KED) | 1.243 ppb             | 146,011 cps       | 1.8 %         |
| 209Bi (KED) | 80.147 %              | 2,655,131 cps     | 0.2 %         |
| 232Th (KED) | 0.416 ppb             | 95,518 cps        | 1.7 %         |
| 238U (KED)  | 0.090 ppb             | 24,545 cps        | 2.1 %         |

## Sample Summary

Instrument ID: iCAP Q

Analysis index: 17

Analysis name: 032366(0005)jian

Analysis started at: 9/28/2021 3:50:52 PM

User name: WINDOWS-UPCI4ER\Administrator

| Category    | Concentration average | Concentration RSD |
|-------------|-----------------------|-------------------|
| 6Li (KED)   | 116.034 %             | 5.1 %             |
| 9Be (KED)   | 0.067 ppb             | 74.9 %            |
| 11B (KED)   | -15.745 ppb           | 5.1 %             |
| 24Mg (KED)  | 1,492.923 ppb         | 6.6 %             |
| 27Al (KED)  | 1,895.703 ppb         | 3.3 %             |
| 45Sc (KED)  | 131.457 %             | 3.9 %             |
| 51V (KED)   | 3.314 ppb             | 3.8 %             |
| 52Cr (KED)  | 4.308 ppb             | 4.6 %             |
| 55Mn (KED)  | 42.402 ppb            | 2.7 %             |
| 56Fe (KED)  | 1,922.111 ppb         | 3.4 %             |
| 58Ni (KED)  | 8.030 ppb             | 3.4 %             |
| 59Co (KED)  | 0.832 ppb             | 6.0 %             |
| 63Cu (KED)  | 12.827 ppb            | 1.3 %             |
| 64Zn (KED)  | 141.557 ppb           | 1.0 %             |
| 69Ga (KED)  | 4.011 ppb             | 1.4 %             |
| 75As (KED)  | 1.048 ppb             | 1.9 %             |
| 80Se (KED)  | 0.082 ppb             | 195.1 %           |
| 85Rb (KED)  | 4.819 ppb             | 1.6 %             |
| 88Sr (KED)  | 22.979 ppb            | 2.0 %             |
| 89Y (KED)   | 115.926 %             | 1.7 %             |
| 107Ag (KED) | 0.208 ppb             | 3.8 %             |
| 114Cd (KED) | 0.057 ppb             | 3.2 %             |
| 115In (KED) | 99.044 %              | 1.6 %             |
| 133Cs (KED) | 0.406 ppb             | 3.2 %             |
| 138Ba (KED) | 14.450 ppb            | 0.5 %             |
| 139La (KED) | 1.544 ppb             | 1.5 %             |
| 140Ce (KED) | 3.226 ppb             | 0.6 %             |
| 141Pr (KED) | 0.368 ppb             | 1.4 %             |
| 142Nd (KED) | 1.995 ppb             | 1.0 %             |
| 152Sm (KED) | 0.273 ppb             | 3.3 %             |
| 153Eu (KED) | 0.054 ppb             | 3.3 %             |
| 158Gd (KED) | 0.241 ppb             | 2.9 %             |
| 159Tb (KED) | 96.331 %              | 0.9 %             |
| 164Dy (KED) | 0.175 ppb             | 0.8 %             |
| 166Er (KED) | 0.085 ppb             | 2.3 %             |
| 169Tm (KED) | 0.011 ppb             | 2.2 %             |
| 174Yb (KED) | 0.065 ppb             | 0.4 %             |
| 175Lu (KED) | -0.002 ppb            | 31.4 %            |
| 205Tl (KED) | 0.028 ppb             | 5.2 %             |
| 208Pb (KED) | 1.952 ppb             | 4.6 %             |
| 209Bi (KED) | 76.489 %              | 1.2 %             |
| 232Th (KED) | 0.621 ppb             | 2.4 %             |
| 238U (KED)  | 0.149 ppb             | 0.8 %             |

| Category   | Concentration average | Intensity average | Intensity RSD |
|------------|-----------------------|-------------------|---------------|
| 6Li (KED)  | 116.034 %             | 2,879 cps         | 5.1 %         |
| 9Be (KED)  | 0.067 ppb             | 9 cps             | 78.1 %        |
| 11B (KED)  | -15.745 ppb           | 529 cps           | 14.2 %        |
| 24Mg (KED) | 1,492.923 ppb         | 735,228 cps       | 1.3 %         |
| 27Al (KED) | 1,895.703 ppb         | 253,715 cps       | 2.0 %         |

| Category    | Concentration average | Intensity average | Intensity RSD |
|-------------|-----------------------|-------------------|---------------|
| 45Sc (KED)  | 131.457 %             | 40,335 cps        | 3.9 %         |
| 51V (KED)   | 3.314 ppb             | 25,282 cps        | 0.1 %         |
| 52Cr (KED)  | 4.308 ppb             | 50,521 cps        | 0.6 %         |
| 55Mn (KED)  | 42.402 ppb            | 256,042 cps       | 1.2 %         |
| 56Fe (KED)  | 1,922.111 ppb         | 20,852,191 cps    | 1.9 %         |
| 58Ni (KED)  | 8.030 ppb             | 111,117 cps       | 0.6 %         |
| 59Co (KED)  | 0.832 ppb             | 19,272 cps        | 2.1 %         |
| 63Cu (KED)  | 12.827 ppb            | 194,327 cps       | 1.6 %         |
| 64Zn (KED)  | 141.557 ppb           | 553,737 cps       | 1.0 %         |
| 69Ga (KED)  | 4.011 ppb             | 20,663 cps        | 1.4 %         |
| 75As (KED)  | 1.048 ppb             | 1,230 cps         | 0.3 %         |
| 80Se (KED)  | 0.082 ppb             | 1,131 cps         | 5.4 %         |
| 85Rb (KED)  | 4.819 ppb             | 24,943 cps        | 0.9 %         |
| 88Sr (KED)  | 22.979 ppb            | 168,067 cps       | 1.1 %         |
| 89Y (KED)   | 115.926 %             | 343,271 cps       | 1.7 %         |
| 107Ag (KED) | 0.208 ppb             | 8,869 cps         | 4.0 %         |
| 114Cd (KED) | 0.057 ppb             | 923 cps           | 3.8 %         |
| 115In (KED) | 99.044 %              | 580,055 cps       | 1.6 %         |
| 133Cs (KED) | 0.406 ppb             | 9,787 cps         | 1.8 %         |
| 138Ba (KED) | 14.450 ppb            | 496,496 cps       | 0.7 %         |
| 139La (KED) | 1.544 ppb             | 112,008 cps       | 1.6 %         |
| 140Ce (KED) | 3.226 ppb             | 313,101 cps       | 0.4 %         |
| 141Pr (KED) | 0.368 ppb             | 38,311 cps        | 2.1 %         |
| 142Nd (KED) | 1.995 ppb             | 82,074 cps        | 0.5 %         |
| 152Sm (KED) | 0.273 ppb             | 10,748 cps        | 2.5 %         |
| 153Eu (KED) | 0.054 ppb             | 4,303 cps         | 3.2 %         |
| 158Gd (KED) | 0.241 ppb             | 13,185 cps        | 3.6 %         |
| 159Tb (KED) | 96.331 %              | 3,323,310 cps     | 0.9 %         |
| 164Dy (KED) | 0.175 ppb             | 10,690 cps        | 0.1 %         |
| 166Er (KED) | 0.085 ppb             | 6,571 cps         | 2.8 %         |
| 169Tm (KED) | 0.011 ppb             | 2,671 cps         | 3.0 %         |
| 174Yb (KED) | 0.065 ppb             | 5,899 cps         | 0.8 %         |
| 175Lu (KED) | -0.002 ppb            | 16,383 cps        | 0.8 %         |
| 205Tl (KED) | 0.028 ppb             | 4,283 cps         | 4.3 %         |
| 208Pb (KED) | 1.952 ppb             | 212,790 cps       | 3.1 %         |
| 209Bi (KED) | 76.489 %              | 2,533,962 cps     | 1.2 %         |
| 232Th (KED) | 0.621 ppb             | 136,079 cps       | 1.3 %         |
| 238U (KED)  | 0.149 ppb             | 38,781 cps        | 1.9 %         |

## Sample Summary

Instrument ID: iCAP Q

Analysis index: 18

Analysis name: 032365(0001)jian

Analysis started at: 9/28/2021 3:54:36 PM

User name: WINDOWS-UPCI4ER\Administrator

| Category    | Concentration average | Concentration RSD |
|-------------|-----------------------|-------------------|
| 6Li (KED)   | 109.405 %             | 1.7 %             |
| 9Be (KED)   | 0.072 ppb             | 22.7 %            |
| 11B (KED)   | -17.558 ppb           | 1.6 %             |
| 24Mg (KED)  | 960.242 ppb           | 1.8 %             |
| 27Al (KED)  | 1,071.210 ppb         | 2.4 %             |
| 45Sc (KED)  | 132.913 %             | 0.6 %             |
| 51V (KED)   | 1.796 ppb             | 2.2 %             |
| 52Cr (KED)  | 2.133 ppb             | 0.5 %             |
| 55Mn (KED)  | 24.048 ppb            | 0.4 %             |
| 56Fe (KED)  | 1,078.032 ppb         | 0.9 %             |
| 58Ni (KED)  | 4.475 ppb             | 0.4 %             |
| 59Co (KED)  | 0.476 ppb             | 1.4 %             |
| 63Cu (KED)  | 9.332 ppb             | 2.1 %             |
| 64Zn (KED)  | 145.272 ppb           | 2.5 %             |
| 69Ga (KED)  | 2.116 ppb             | 2.6 %             |
| 75As (KED)  | 0.763 ppb             | 3.1 %             |
| 80Se (KED)  | 0.152 ppb             | 68.5 %            |
| 85Rb (KED)  | 3.047 ppb             | 1.9 %             |
| 88Sr (KED)  | 14.921 ppb            | 2.1 %             |
| 89Y (KED)   | 113.665 %             | 0.6 %             |
| 107Ag (KED) | 0.047 ppb             | 6.1 %             |
| 114Cd (KED) | 0.032 ppb             | 5.0 %             |
| 115In (KED) | 99.663 %              | 0.2 %             |
| 133Cs (KED) | 0.215 ppb             | 4.8 %             |
| 138Ba (KED) | 7.344 ppb             | 0.9 %             |
| 139La (KED) | 0.832 ppb             | 1.5 %             |
| 140Ce (KED) | 1.746 ppb             | 1.0 %             |
| 141Pr (KED) | 0.197 ppb             | 1.9 %             |
| 142Nd (KED) | 1.085 ppb             | 1.8 %             |
| 152Sm (KED) | 0.151 ppb             | 2.3 %             |
| 153Eu (KED) | 0.030 ppb             | 5.7 %             |
| 158Gd (KED) | 0.133 ppb             | 3.5 %             |
| 159Tb (KED) | 95.979 %              | 0.9 %             |
| 164Dy (KED) | 0.096 ppb             | 3.1 %             |
| 166Er (KED) | 0.045 ppb             | 5.5 %             |
| 169Tm (KED) | 0.006 ppb             | 1.8 %             |
| 174Yb (KED) | 0.035 ppb             | 1.3 %             |
| 175Lu (KED) | -0.005 ppb            | 71.0 %            |
| 205Tl (KED) | 0.018 ppb             | 1.0 %             |
| 208Pb (KED) | 1.145 ppb             | 3.5 %             |
| 209Bi (KED) | 77.708 %              | 3.0 %             |
| 232Th (KED) | 0.342 ppb             | 4.6 %             |
| 238U (KED)  | 0.083 ppb             | 3.8 %             |

| Category   | Concentration average | Intensity average | Intensity RSD |
|------------|-----------------------|-------------------|---------------|
| 6Li (KED)  | 109.405 %             | 2,715 cps         | 1.7 %         |
| 9Be (KED)  | 0.072 ppb             | 9 cps             | 21.7 %        |
| 11B (KED)  | -17.558 ppb           | 384 cps           | 3.0 %         |
| 24Mg (KED) | 960.242 ppb           | 446,835 cps       | 0.3 %         |
| 27Al (KED) | 1,071.210 ppb         | 145,090 cps       | 2.1 %         |

| Category    | Concentration average | Intensity average | Intensity RSD |
|-------------|-----------------------|-------------------|---------------|
| 45Sc (KED)  | 132.913 %             | 40,782 cps        | 0.6 %         |
| 51V (KED)   | 1.796 ppb             | 13,869 cps        | 1.8 %         |
| 52Cr (KED)  | 2.133 ppb             | 25,396 cps        | 1.0 %         |
| 55Mn (KED)  | 24.048 ppb            | 146,942 cps       | 0.5 %         |
| 56Fe (KED)  | 1,078.032 ppb         | 11,835,125 cps    | 1.3 %         |
| 58Ni (KED)  | 4.475 ppb             | 63,862 cps        | 1.0 %         |
| 59Co (KED)  | 0.476 ppb             | 11,193 cps        | 1.8 %         |
| 63Cu (KED)  | 9.332 ppb             | 138,807 cps       | 1.7 %         |
| 64Zn (KED)  | 145.272 ppb           | 557,186 cps       | 2.2 %         |
| 69Ga (KED)  | 2.116 ppb             | 10,696 cps        | 2.2 %         |
| 75As (KED)  | 0.763 ppb             | 881 cps           | 3.1 %         |
| 80Se (KED)  | 0.152 ppb             | 1,133 cps         | 2.6 %         |
| 85Rb (KED)  | 3.047 ppb             | 15,472 cps        | 1.3 %         |
| 88Sr (KED)  | 14.921 ppb            | 107,060 cps       | 1.9 %         |
| 89Y (KED)   | 113.665 %             | 336,576 cps       | 0.6 %         |
| 107Ag (KED) | 0.047 ppb             | 2,030 cps         | 6.2 %         |
| 114Cd (KED) | 0.032 ppb             | 558 cps           | 4.6 %         |
| 115In (KED) | 99.663 %              | 583,682 cps       | 0.2 %         |
| 133Cs (KED) | 0.215 ppb             | 5,224 cps         | 4.9 %         |
| 138Ba (KED) | 7.344 ppb             | 251,781 cps       | 1.3 %         |
| 139La (KED) | 0.832 ppb             | 60,142 cps        | 2.2 %         |
| 140Ce (KED) | 1.746 ppb             | 168,844 cps       | 1.1 %         |
| 141Pr (KED) | 0.197 ppb             | 20,409 cps        | 2.0 %         |
| 142Nd (KED) | 1.085 ppb             | 44,487 cps        | 1.4 %         |
| 152Sm (KED) | 0.151 ppb             | 5,931 cps         | 3.1 %         |
| 153Eu (KED) | 0.030 ppb             | 2,342 cps         | 6.1 %         |
| 158Gd (KED) | 0.133 ppb             | 7,283 cps         | 3.9 %         |
| 159Tb (KED) | 95.979 %              | 3,311,176 cps     | 0.9 %         |
| 164Dy (KED) | 0.096 ppb             | 5,850 cps         | 3.7 %         |
| 166Er (KED) | 0.045 ppb             | 3,519 cps         | 4.5 %         |
| 169Tm (KED) | 0.006 ppb             | 1,442 cps         | 1.3 %         |
| 174Yb (KED) | 0.035 ppb             | 3,180 cps         | 1.9 %         |
| 175Lu (KED) | -0.005 ppb            | 15,983 cps        | 2.2 %         |
| 205Tl (KED) | 0.018 ppb             | 2,866 cps         | 3.9 %         |
| 208Pb (KED) | 1.145 ppb             | 131,124 cps       | 0.6 %         |
| 209Bi (KED) | 77.708 %              | 2,574,343 cps     | 3.0 %         |
| 232Th (KED) | 0.342 ppb             | 75,981 cps        | 1.5 %         |
| 238U (KED)  | 0.083 ppb             | 22,008 cps        | 1.2 %         |

## Sample Summary

Instrument ID: iCAP Q

Analysis index: 19

Analysis name: 020519(179195)jian

Analysis started at: 9/28/2021 3:58:02 PM

User name: WINDOWS-UPCI4ER\Administrator

| Category    | Concentration average | Concentration RSD |
|-------------|-----------------------|-------------------|
| 6Li (KED)   | 116.348 %             | 2.8 %             |
| 9Be (KED)   | 0.026 ppb             | 99.9 %            |
| 11B (KED)   | -19.150 ppb           | 1.7 %             |
| 24Mg (KED)  | 344.187 ppb           | 3.7 %             |
| 27Al (KED)  | 383.166 ppb           | 0.9 %             |
| 45Sc (KED)  | 124.086 %             | 1.4 %             |
| 51V (KED)   | 0.748 ppb             | 2.8 %             |
| 52Cr (KED)  | 1.458 ppb             | 56.4 %            |
| 55Mn (KED)  | 11.422 ppb            | 0.8 %             |
| 56Fe (KED)  | 456.219 ppb           | 0.9 %             |
| 58Ni (KED)  | 2.081 ppb             | 1.1 %             |
| 59Co (KED)  | 0.221 ppb             | 4.0 %             |
| 63Cu (KED)  | 6.852 ppb             | 0.4 %             |
| 64Zn (KED)  | 132.345 ppb           | 0.8 %             |
| 69Ga (KED)  | 1.190 ppb             | 2.4 %             |
| 75As (KED)  | 0.420 ppb             | 0.7 %             |
| 80Se (KED)  | 0.335 ppb             | 120.3 %           |
| 85Rb (KED)  | 1.389 ppb             | 0.9 %             |
| 88Sr (KED)  | 4.125 ppb             | 1.6 %             |
| 89Y (KED)   | 111.414 %             | 0.9 %             |
| 107Ag (KED) | 0.217 ppb             | 0.5 %             |
| 114Cd (KED) | 0.061 ppb             | 5.6 %             |
| 115In (KED) | 101.779 %             | 1.9 %             |
| 133Cs (KED) | 0.093 ppb             | 3.6 %             |
| 138Ba (KED) | 4.417 ppb             | 0.5 %             |
| 139La (KED) | 0.339 ppb             | 2.4 %             |
| 140Ce (KED) | 0.703 ppb             | 2.1 %             |
| 141Pr (KED) | 0.083 ppb             | 2.2 %             |
| 142Nd (KED) | 0.450 ppb             | 2.1 %             |
| 152Sm (KED) | 0.061 ppb             | 1.2 %             |
| 153Eu (KED) | 0.012 ppb             | 6.8 %             |
| 158Gd (KED) | 0.056 ppb             | 4.9 %             |
| 159Tb (KED) | 98.092 %              | 0.5 %             |
| 164Dy (KED) | 0.040 ppb             | 2.5 %             |
| 166Er (KED) | 0.020 ppb             | 4.4 %             |
| 169Tm (KED) | 0.003 ppb             | 6.8 %             |
| 174Yb (KED) | 0.015 ppb             | 5.5 %             |
| 175Lu (KED) | -0.014 ppb            | 42.0 %            |
| 205Tl (KED) | 0.011 ppb             | 5.6 %             |
| 208Pb (KED) | 0.674 ppb             | 2.2 %             |
| 209Bi (KED) | 83.143 %              | 2.5 %             |
| 232Th (KED) | 0.117 ppb             | 2.7 %             |
| 238U (KED)  | 0.034 ppb             | 2.7 %             |

| Category   | Concentration average | Intensity average | Intensity RSD |
|------------|-----------------------|-------------------|---------------|
| 6Li (KED)  | 116.348 %             | 2,887 cps         | 2.8 %         |
| 9Be (KED)  | 0.026 ppb             | 3 cps             | 100.0 %       |
| 11B (KED)  | -19.150 ppb           | 303 cps           | 5.0 %         |
| 24Mg (KED) | 344.187 ppb           | 170,319 cps       | 1.2 %         |
| 27Al (KED) | 383.166 ppb           | 48,504 cps        | 2.2 %         |

| Category    | Concentration average | Intensity average | Intensity RSD |
|-------------|-----------------------|-------------------|---------------|
| 45Sc (KED)  | 124.086 %             | 38,074 cps        | 1.4 %         |
| 51V (KED)   | 0.748 ppb             | 5,397 cps         | 3.5 %         |
| 52Cr (KED)  | 1.458 ppb             | 16,234 cps        | 55.4 %        |
| 55Mn (KED)  | 11.422 ppb            | 65,184 cps        | 1.5 %         |
| 56Fe (KED)  | 456.219 ppb           | 4,676,982 cps     | 0.9 %         |
| 58Ni (KED)  | 2.081 ppb             | 29,082 cps        | 1.6 %         |
| 59Co (KED)  | 0.221 ppb             | 4,882 cps         | 3.1 %         |
| 63Cu (KED)  | 6.852 ppb             | 100,077 cps       | 0.8 %         |
| 64Zn (KED)  | 132.345 ppb           | 497,627 cps       | 0.3 %         |
| 69Ga (KED)  | 1.190 ppb             | 5,908 cps         | 1.9 %         |
| 75As (KED)  | 0.420 ppb             | 479 cps           | 1.6 %         |
| 80Se (KED)  | 0.335 ppb             | 1,172 cps         | 10.8 %        |
| 85Rb (KED)  | 1.389 ppb             | 6,921 cps         | 1.6 %         |
| 88Sr (KED)  | 4.125 ppb             | 29,081 cps        | 0.7 %         |
| 89Y (KED)   | 111.414 %             | 329,909 cps       | 0.9 %         |
| 107Ag (KED) | 0.217 ppb             | 9,483 cps         | 2.4 %         |
| 114Cd (KED) | 0.061 ppb             | 1,012 cps         | 7.3 %         |
| 115In (KED) | 101.779 %             | 596,074 cps       | 1.9 %         |
| 133Cs (KED) | 0.093 ppb             | 2,328 cps         | 4.9 %         |
| 138Ba (KED) | 4.417 ppb             | 155,048 cps       | 0.9 %         |
| 139La (KED) | 0.339 ppb             | 25,073 cps        | 2.5 %         |
| 140Ce (KED) | 0.703 ppb             | 69,595 cps        | 2.5 %         |
| 141Pr (KED) | 0.083 ppb             | 8,805 cps         | 2.3 %         |
| 142Nd (KED) | 0.450 ppb             | 18,874 cps        | 1.6 %         |
| 152Sm (KED) | 0.061 ppb             | 2,442 cps         | 1.5 %         |
| 153Eu (KED) | 0.012 ppb             | 968 cps           | 6.3 %         |
| 158Gd (KED) | 0.056 ppb             | 3,119 cps         | 4.4 %         |
| 159Tb (KED) | 98.092 %              | 3,384,068 cps     | 0.5 %         |
| 164Dy (KED) | 0.040 ppb             | 2,526 cps         | 2.4 %         |
| 166Er (KED) | 0.020 ppb             | 1,688 cps         | 3.7 %         |
| 169Tm (KED) | 0.003 ppb             | 704 cps           | 6.6 %         |
| 174Yb (KED) | 0.015 ppb             | 1,427 cps         | 5.9 %         |
| 175Lu (KED) | -0.014 ppb            | 15,017 cps        | 6.1 %         |
| 205Tl (KED) | 0.011 ppb             | 1,850 cps         | 6.9 %         |
| 208Pb (KED) | 0.674 ppb             | 87,283 cps        | 3.7 %         |
| 209Bi (KED) | 83.143 %              | 2,754,369 cps     | 2.5 %         |
| 232Th (KED) | 0.117 ppb             | 27,980 cps        | 2.1 %         |
| 238U (KED)  | 0.034 ppb             | 9,692 cps         | 3.3 %         |

## Sample Summary

Instrument ID: iCAP Q

Analysis index: 20

Analysis name: 020315(107)jian

Analysis started at: 9/28/2021 4:01:32 PM

User name: WINDOWS-UPCI4ER\Administrator

| Category    | Concentration average | Concentration RSD |
|-------------|-----------------------|-------------------|
| 6Li (KED)   | 111.690 %             | 2.2 %             |
| 9Be (KED)   | 0.027 ppb             | 99.2 %            |
| 11B (KED)   | -17.572 ppb           | 20.3 %            |
| 24Mg (KED)  | 547.819 ppb           | 0.9 %             |
| 27Al (KED)  | 701.345 ppb           | 2.6 %             |
| 45Sc (KED)  | 121.521 %             | 2.2 %             |
| 51V (KED)   | 1.339 ppb             | 2.1 %             |
| 52Cr (KED)  | 1.819 ppb             | 0.7 %             |
| 55Mn (KED)  | 18.809 ppb            | 1.7 %             |
| 56Fe (KED)  | 770.354 ppb           | 1.4 %             |
| 58Ni (KED)  | 3.338 ppb             | 0.6 %             |
| 59Co (KED)  | 0.349 ppb             | 2.0 %             |
| 63Cu (KED)  | 7.387 ppb             | 1.9 %             |
| 64Zn (KED)  | 121.386 ppb           | 2.1 %             |
| 69Ga (KED)  | 1.787 ppb             | 4.9 %             |
| 75As (KED)  | 0.647 ppb             | 1.9 %             |
| 80Se (KED)  | 0.381 ppb             | 68.5 %            |
| 85Rb (KED)  | 1.863 ppb             | 1.4 %             |
| 88Sr (KED)  | 6.813 ppb             | 1.2 %             |
| 89Y (KED)   | 112.690 %             | 1.0 %             |
| 107Ag (KED) | 0.151 ppb             | 2.7 %             |
| 114Cd (KED) | 0.041 ppb             | 7.7 %             |
| 115In (KED) | 102.999 %             | 0.7 %             |
| 133Cs (KED) | 0.165 ppb             | 2.3 %             |
| 138Ba (KED) | 6.928 ppb             | 0.6 %             |
| 139La (KED) | 0.809 ppb             | 0.4 %             |
| 140Ce (KED) | 1.647 ppb             | 0.6 %             |
| 141Pr (KED) | 0.193 ppb             | 3.2 %             |
| 142Nd (KED) | 1.044 ppb             | 0.6 %             |
| 152Sm (KED) | 0.140 ppb             | 0.8 %             |
| 153Eu (KED) | 0.027 ppb             | 6.6 %             |
| 158Gd (KED) | 0.113 ppb             | 1.0 %             |
| 159Tb (KED) | 102.252 %             | 1.2 %             |
| 164Dy (KED) | 0.074 ppb             | 0.6 %             |
| 166Er (KED) | 0.038 ppb             | 9.5 %             |
| 169Tm (KED) | 0.005 ppb             | 3.9 %             |
| 174Yb (KED) | 0.028 ppb             | 1.1 %             |
| 175Lu (KED) | -0.012 ppb            | 23.6 %            |
| 205Tl (KED) | 0.013 ppb             | 2.4 %             |
| 208Pb (KED) | 1.407 ppb             | 2.9 %             |
| 209Bi (KED) | 87.242 %              | 3.0 %             |
| 232Th (KED) | 0.232 ppb             | 2.0 %             |
| 238U (KED)  | 0.057 ppb             | 1.7 %             |

| Category   | Concentration average | Intensity average | Intensity RSD |
|------------|-----------------------|-------------------|---------------|
| 6Li (KED)  | 111.690 %             | 2,771 cps         | 2.2 %         |
| 9Be (KED)  | 0.027 ppb             | 3 cps             | 100.0 %       |
| 11B (KED)  | -17.572 ppb           | 394 cps           | 59.8 %        |
| 24Mg (KED) | 547.819 ppb           | 260,308 cps       | 1.3 %         |
| 27Al (KED) | 701.345 ppb           | 86,851 cps        | 1.2 %         |

| Category    | Concentration average | Intensity average | Intensity RSD |
|-------------|-----------------------|-------------------|---------------|
| 45Sc (KED)  | 121.521 %             | 37,287 cps        | 2.2 %         |
| 51V (KED)   | 1.339 ppb             | 9,457 cps         | 1.5 %         |
| 52Cr (KED)  | 1.819 ppb             | 19,821 cps        | 1.6 %         |
| 55Mn (KED)  | 18.809 ppb            | 105,068 cps       | 0.7 %         |
| 56Fe (KED)  | 770.354 ppb           | 7,731,557 cps     | 1.2 %         |
| 58Ni (KED)  | 3.338 ppb             | 44,178 cps        | 1.7 %         |
| 59Co (KED)  | 0.349 ppb             | 7,521 cps         | 2.4 %         |
| 63Cu (KED)  | 7.387 ppb             | 109,054 cps       | 1.0 %         |
| 64Zn (KED)  | 121.386 ppb           | 461,668 cps       | 1.1 %         |
| 69Ga (KED)  | 1.787 ppb             | 8,958 cps         | 3.9 %         |
| 75As (KED)  | 0.647 ppb             | 741 cps           | 1.7 %         |
| 80Se (KED)  | 0.381 ppb             | 1,202 cps         | 7.0 %         |
| 85Rb (KED)  | 1.863 ppb             | 9,385 cps         | 2.0 %         |
| 88Sr (KED)  | 6.813 ppb             | 48,518 cps        | 0.6 %         |
| 89Y (KED)   | 112.690 %             | 333,689 cps       | 1.0 %         |
| 107Ag (KED) | 0.151 ppb             | 6,717 cps         | 2.0 %         |
| 114Cd (KED) | 0.041 ppb             | 717 cps           | 6.7 %         |
| 115In (KED) | 102.999 %             | 603,219 cps       | 0.7 %         |
| 133Cs (KED) | 0.165 ppb             | 4,153 cps         | 1.6 %         |
| 138Ba (KED) | 6.928 ppb             | 253,108 cps       | 1.4 %         |
| 139La (KED) | 0.809 ppb             | 62,328 cps        | 0.8 %         |
| 140Ce (KED) | 1.647 ppb             | 169,742 cps       | 1.6 %         |
| 141Pr (KED) | 0.193 ppb             | 21,362 cps        | 2.1 %         |
| 142Nd (KED) | 1.044 ppb             | 45,597 cps        | 0.6 %         |
| 152Sm (KED) | 0.140 ppb             | 5,854 cps         | 1.3 %         |
| 153Eu (KED) | 0.027 ppb             | 2,278 cps         | 5.3 %         |
| 158Gd (KED) | 0.113 ppb             | 6,545 cps         | 1.6 %         |
| 159Tb (KED) | 102.252 %             | 3,527,600 cps     | 1.2 %         |
| 164Dy (KED) | 0.074 ppb             | 4,826 cps         | 1.5 %         |
| 166Er (KED) | 0.038 ppb             | 3,216 cps         | 9.5 %         |
| 169Tm (KED) | 0.005 ppb             | 1,232 cps         | 3.6 %         |
| 174Yb (KED) | 0.028 ppb             | 2,714 cps         | 0.1 %         |
| 175Lu (KED) | -0.012 ppb            | 15,956 cps        | 1.8 %         |
| 205Tl (KED) | 0.013 ppb             | 2,270 cps         | 5.1 %         |
| 208Pb (KED) | 1.407 ppb             | 178,318 cps       | 2.5 %         |
| 209Bi (KED) | 87.242 %              | 2,890,182 cps     | 3.0 %         |
| 232Th (KED) | 0.232 ppb             | 57,928 cps        | 2.5 %         |
| 238U (KED)  | 0.057 ppb             | 17,057 cps        | 1.4 %         |

## Sample Summary

Instrument ID: iCAP Q

Analysis index: 21

Analysis name: 023838(179203)jian

Analysis started at: 9/28/2021 4:04:57 PM

User name: WINDOWS-UPCI4ER\Administrator

| Category    | Concentration average | Concentration RSD |
|-------------|-----------------------|-------------------|
| 6Li (KED)   | 112.003 %             | 6.2 %             |
| 9Be (KED)   | 0.018 ppb             | 86.7 %            |
| 11B (KED)   | -19.067 ppb           | 2.9 %             |
| 24Mg (KED)  | 596.379 ppb           | 6.0 %             |
| 27Al (KED)  | 697.330 ppb           | 1.2 %             |
| 45Sc (KED)  | 118.438 %             | 1.2 %             |
| 51V (KED)   | 1.436 ppb             | 1.0 %             |
| 52Cr (KED)  | 1.814 ppb             | 1.4 %             |
| 55Mn (KED)  | 20.579 ppb            | 1.1 %             |
| 56Fe (KED)  | 836.503 ppb           | 0.8 %             |
| 58Ni (KED)  | 3.866 ppb             | 1.8 %             |
| 59Co (KED)  | 0.371 ppb             | 2.1 %             |
| 63Cu (KED)  | 9.067 ppb             | 2.1 %             |
| 64Zn (KED)  | 128.885 ppb           | 1.3 %             |
| 69Ga (KED)  | 1.926 ppb             | 3.3 %             |
| 75As (KED)  | 0.583 ppb             | 14.4 %            |
| 80Se (KED)  | 0.168 ppb             | 132.0 %           |
| 85Rb (KED)  | 1.930 ppb             | 1.7 %             |
| 88Sr (KED)  | 7.433 ppb             | 0.7 %             |
| 89Y (KED)   | 111.667 %             | 0.4 %             |
| 107Ag (KED) | 0.113 ppb             | 2.7 %             |
| 114Cd (KED) | 0.065 ppb             | 5.9 %             |
| 115In (KED) | 101.401 %             | 1.4 %             |
| 133Cs (KED) | 0.163 ppb             | 2.7 %             |
| 138Ba (KED) | 7.665 ppb             | 2.7 %             |
| 139La (KED) | 0.655 ppb             | 3.6 %             |
| 140Ce (KED) | 1.324 ppb             | 2.5 %             |
| 141Pr (KED) | 0.157 ppb             | 1.5 %             |
| 142Nd (KED) | 0.839 ppb             | 0.9 %             |
| 152Sm (KED) | 0.114 ppb             | 1.3 %             |
| 153Eu (KED) | 0.023 ppb             | 8.4 %             |
| 158Gd (KED) | 0.103 ppb             | 2.2 %             |
| 159Tb (KED) | 103.446 %             | 1.9 %             |
| 164Dy (KED) | 0.075 ppb             | 1.1 %             |
| 166Er (KED) | 0.035 ppb             | 5.2 %             |
| 169Tm (KED) | 0.005 ppb             | 2.7 %             |
| 174Yb (KED) | 0.034 ppb             | 0.7 %             |
| 175Lu (KED) | -0.010 ppb            | 14.2 %            |
| 205Tl (KED) | 0.015 ppb             | 3.3 %             |
| 208Pb (KED) | 1.344 ppb             | 2.2 %             |
| 209Bi (KED) | 85.477 %              | 1.0 %             |
| 232Th (KED) | 0.228 ppb             | 1.8 %             |
| 238U (KED)  | 0.059 ppb             | 1.7 %             |

| Category   | Concentration average | Intensity average | Intensity RSD |
|------------|-----------------------|-------------------|---------------|
| 6Li (KED)  | 112.003 %             | 2,779 cps         | 6.2 %         |
| 9Be (KED)  | 0.018 ppb             | 2 cps             | 86.6 %        |
| 11B (KED)  | -19.067 ppb           | 297 cps           | 8.9 %         |
| 24Mg (KED) | 596.379 ppb           | 283,497 cps       | 0.5 %         |
| 27Al (KED) | 697.330 ppb           | 84,185 cps        | 0.5 %         |

| Category    | Concentration average | Intensity average | Intensity RSD |
|-------------|-----------------------|-------------------|---------------|
| 45Sc (KED)  | 118.438 %             | 36,341 cps        | 1.2 %         |
| 51V (KED)   | 1.436 ppb             | 9,883 cps         | 0.7 %         |
| 52Cr (KED)  | 1.814 ppb             | 19,264 cps        | 0.8 %         |
| 55Mn (KED)  | 20.579 ppb            | 112,054 cps       | 0.8 %         |
| 56Fe (KED)  | 836.503 ppb           | 8,183,271 cps     | 0.6 %         |
| 58Ni (KED)  | 3.866 ppb             | 49,487 cps        | 1.1 %         |
| 59Co (KED)  | 0.371 ppb             | 7,785 cps         | 2.7 %         |
| 63Cu (KED)  | 9.067 ppb             | 132,509 cps       | 1.6 %         |
| 64Zn (KED)  | 128.885 ppb           | 485,743 cps       | 0.9 %         |
| 69Ga (KED)  | 1.926 ppb             | 9,567 cps         | 2.9 %         |
| 75As (KED)  | 0.583 ppb             | 663 cps           | 14.6 %        |
| 80Se (KED)  | 0.168 ppb             | 1,119 cps         | 7.0 %         |
| 85Rb (KED)  | 1.930 ppb             | 9,630 cps         | 1.9 %         |
| 88Sr (KED)  | 7.433 ppb             | 52,450 cps        | 0.8 %         |
| 89Y (KED)   | 111.667 %             | 330,658 cps       | 0.4 %         |
| 107Ag (KED) | 0.113 ppb             | 4,931 cps         | 3.5 %         |
| 114Cd (KED) | 0.065 ppb             | 1,074 cps         | 7.0 %         |
| 115In (KED) | 101.401 %             | 593,858 cps       | 1.4 %         |
| 133Cs (KED) | 0.163 ppb             | 4,028 cps         | 2.1 %         |
| 138Ba (KED) | 7.665 ppb             | 283,106 cps       | 1.1 %         |
| 139La (KED) | 0.655 ppb             | 51,052 cps        | 1.7 %         |
| 140Ce (KED) | 1.324 ppb             | 138,010 cps       | 1.3 %         |
| 141Pr (KED) | 0.157 ppb             | 17,515 cps        | 1.9 %         |
| 142Nd (KED) | 0.839 ppb             | 37,066 cps        | 1.9 %         |
| 152Sm (KED) | 0.114 ppb             | 4,839 cps         | 1.9 %         |
| 153Eu (KED) | 0.023 ppb             | 1,965 cps         | 7.3 %         |
| 158Gd (KED) | 0.103 ppb             | 6,061 cps         | 1.6 %         |
| 159Tb (KED) | 103.446 %             | 3,568,792 cps     | 1.9 %         |
| 164Dy (KED) | 0.075 ppb             | 4,915 cps         | 2.4 %         |
| 166Er (KED) | 0.035 ppb             | 3,039 cps         | 3.5 %         |
| 169Tm (KED) | 0.005 ppb             | 1,449 cps         | 4.3 %         |
| 174Yb (KED) | 0.034 ppb             | 3,277 cps         | 2.5 %         |
| 175Lu (KED) | -0.010 ppb            | 16,368 cps        | 2.7 %         |
| 205Tl (KED) | 0.015 ppb             | 2,641 cps         | 2.7 %         |
| 208Pb (KED) | 1.344 ppb             | 167,422 cps       | 1.2 %         |
| 209Bi (KED) | 85.477 %              | 2,831,694 cps     | 1.0 %         |
| 232Th (KED) | 0.228 ppb             | 55,782 cps        | 0.8 %         |
| 238U (KED)  | 0.059 ppb             | 17,133 cps        | 0.7 %         |

## Sample Summary

Instrument ID: iCAP Q

Analysis index: 22

Analysis name: 179179jian

Analysis started at: 9/28/2021 4:08:34 PM

User name: WINDOWS-UPCI4ER\Administrator

| Category    | Concentration average | Concentration RSD |
|-------------|-----------------------|-------------------|
| 6Li (KED)   | 108.868 %             | 5.8 %             |
| 9Be (KED)   | 0.019 ppb             | 86.8 %            |
| 11B (KED)   | -17.598 ppb           | 3.2 %             |
| 24Mg (KED)  | 741.616 ppb           | 6.5 %             |
| 27Al (KED)  | 944.609 ppb           | 3.6 %             |
| 45Sc (KED)  | 118.198 %             | 2.1 %             |
| 51V (KED)   | 1.692 ppb             | 4.7 %             |
| 52Cr (KED)  | 2.309 ppb             | 1.6 %             |
| 55Mn (KED)  | 23.445 ppb            | 2.5 %             |
| 56Fe (KED)  | 1,025.193 ppb         | 1.9 %             |
| 58Ni (KED)  | 4.674 ppb             | 2.1 %             |
| 59Co (KED)  | 0.442 ppb             | 1.6 %             |
| 63Cu (KED)  | 8.597 ppb             | 1.6 %             |
| 64Zn (KED)  | 130.737 ppb           | 2.4 %             |
| 69Ga (KED)  | 2.236 ppb             | 3.3 %             |
| 75As (KED)  | 0.663 ppb             | 9.2 %             |
| 80Se (KED)  | 0.303 ppb             | 59.2 %            |
| 85Rb (KED)  | 2.457 ppb             | 3.7 %             |
| 88Sr (KED)  | 9.469 ppb             | 1.6 %             |
| 89Y (KED)   | 110.672 %             | 2.6 %             |
| 107Ag (KED) | 0.114 ppb             | 3.2 %             |
| 114Cd (KED) | 0.048 ppb             | 9.9 %             |
| 115In (KED) | 100.185 %             | 0.8 %             |
| 133Cs (KED) | 0.196 ppb             | 3.2 %             |
| 138Ba (KED) | 8.760 ppb             | 2.2 %             |
| 139La (KED) | 0.906 ppb             | 1.1 %             |
| 140Ce (KED) | 1.840 ppb             | 2.4 %             |
| 141Pr (KED) | 0.213 ppb             | 1.8 %             |
| 142Nd (KED) | 1.149 ppb             | 1.4 %             |
| 152Sm (KED) | 0.157 ppb             | 0.8 %             |
| 153Eu (KED) | 0.030 ppb             | 1.3 %             |
| 158Gd (KED) | 0.140 ppb             | 2.2 %             |
| 159Tb (KED) | 99.949 %              | 1.7 %             |
| 164Dy (KED) | 0.096 ppb             | 3.4 %             |
| 166Er (KED) | 0.047 ppb             | 5.5 %             |
| 169Tm (KED) | 0.006 ppb             | 6.0 %             |
| 174Yb (KED) | 0.036 ppb             | 0.8 %             |
| 175Lu (KED) | -0.008 ppb            | 47.7 %            |
| 205Tl (KED) | 0.017 ppb             | 4.0 %             |
| 208Pb (KED) | 1.457 ppb             | 2.8 %             |
| 209Bi (KED) | 88.020 %              | 2.4 %             |
| 232Th (KED) | 0.306 ppb             | 1.9 %             |
| 238U (KED)  | 0.076 ppb             | 0.4 %             |

| Category   | Concentration average | Intensity average | Intensity RSD |
|------------|-----------------------|-------------------|---------------|
| 6Li (KED)  | 108.868 %             | 2,701 cps         | 5.8 %         |
| 9Be (KED)  | 0.019 ppb             | 2 cps             | 86.6 %        |
| 11B (KED)  | -17.598 ppb           | 379 cps           | 3.3 %         |
| 24Mg (KED) | 741.616 ppb           | 342,632 cps       | 0.7 %         |
| 27Al (KED) | 944.609 ppb           | 113,735 cps       | 1.6 %         |

| Category    | Concentration average | Intensity average | Intensity RSD |
|-------------|-----------------------|-------------------|---------------|
| 45Sc (KED)  | 118.198 %             | 36,267 cps        | 2.1 %         |
| 51V (KED)   | 1.692 ppb             | 11,617 cps        | 2.5 %         |
| 52Cr (KED)  | 2.309 ppb             | 24,432 cps        | 0.7 %         |
| 55Mn (KED)  | 23.445 ppb            | 127,356 cps       | 0.4 %         |
| 56Fe (KED)  | 1,025.193 ppb         | 10,006,586 cps    | 1.2 %         |
| 58Ni (KED)  | 4.674 ppb             | 59,196 cps        | 0.2 %         |
| 59Co (KED)  | 0.442 ppb             | 9,242 cps         | 3.3 %         |
| 63Cu (KED)  | 8.597 ppb             | 124,533 cps       | 1.4 %         |
| 64Zn (KED)  | 130.737 ppb           | 488,138 cps       | 0.3 %         |
| 69Ga (KED)  | 2.236 ppb             | 11,004 cps        | 2.3 %         |
| 75As (KED)  | 0.663 ppb             | 746 cps           | 6.9 %         |
| 80Se (KED)  | 0.303 ppb             | 1,154 cps         | 5.5 %         |
| 85Rb (KED)  | 2.457 ppb             | 12,143 cps        | 1.3 %         |
| 88Sr (KED)  | 9.469 ppb             | 66,180 cps        | 2.0 %         |
| 89Y (KED)   | 110.672 %             | 327,712 cps       | 2.6 %         |
| 107Ag (KED) | 0.114 ppb             | 4,923 cps         | 3.8 %         |
| 114Cd (KED) | 0.048 ppb             | 807 cps           | 8.8 %         |
| 115In (KED) | 100.185 %             | 586,741 cps       | 0.8 %         |
| 133Cs (KED) | 0.196 ppb             | 4,791 cps         | 3.1 %         |
| 138Ba (KED) | 8.760 ppb             | 312,550 cps       | 1.5 %         |
| 139La (KED) | 0.906 ppb             | 68,228 cps        | 1.3 %         |
| 140Ce (KED) | 1.840 ppb             | 185,232 cps       | 0.7 %         |
| 141Pr (KED) | 0.213 ppb             | 23,045 cps        | 0.8 %         |
| 142Nd (KED) | 1.149 ppb             | 49,079 cps        | 1.7 %         |
| 152Sm (KED) | 0.157 ppb             | 6,431 cps         | 0.9 %         |
| 153Eu (KED) | 0.030 ppb             | 2,508 cps         | 1.3 %         |
| 158Gd (KED) | 0.140 ppb             | 7,975 cps         | 2.0 %         |
| 159Tb (KED) | 99.949 %              | 3,448,128 cps     | 1.7 %         |
| 164Dy (KED) | 0.096 ppb             | 6,082 cps         | 2.5 %         |
| 166Er (KED) | 0.047 ppb             | 3,792 cps         | 4.3 %         |
| 169Tm (KED) | 0.006 ppb             | 1,648 cps         | 4.6 %         |
| 174Yb (KED) | 0.036 ppb             | 3,388 cps         | 1.2 %         |
| 175Lu (KED) | -0.008 ppb            | 16,112 cps        | 3.6 %         |
| 205Tl (KED) | 0.017 ppb             | 2,966 cps         | 6.2 %         |
| 208Pb (KED) | 1.457 ppb             | 185,835 cps       | 0.7 %         |
| 209Bi (KED) | 88.020 %              | 2,915,956 cps     | 2.4 %         |
| 232Th (KED) | 0.306 ppb             | 77,071 cps        | 1.2 %         |
| 238U (KED)  | 0.076 ppb             | 22,922 cps        | 2.0 %         |

## Sample Summary

Instrument ID: iCAP Q

Analysis index: 23

Analysis name: 051979(179210)jian

Analysis started at: 9/28/2021 4:12:05 PM

User name: WINDOWS-UPCI4ER\Administrator

| Category    | Concentration average | Concentration RSD |
|-------------|-----------------------|-------------------|
| 6Li (KED)   | 111.824 %             | 0.7 %             |
| 9Be (KED)   | 0.018 ppb             | 173.2 %           |
| 11B (KED)   | -20.595 ppb           | 1.4 %             |
| 24Mg (KED)  | 252.475 ppb           | 0.6 %             |
| 27Al (KED)  | 301.453 ppb           | 2.9 %             |
| 45Sc (KED)  | 117.345 %             | 2.9 %             |
| 51V (KED)   | 0.554 ppb             | 4.0 %             |
| 52Cr (KED)  | 0.922 ppb             | 5.8 %             |
| 55Mn (KED)  | 9.260 ppb             | 4.0 %             |
| 56Fe (KED)  | 339.969 ppb           | 2.4 %             |
| 58Ni (KED)  | 1.501 ppb             | 3.8 %             |
| 59Co (KED)  | 0.171 ppb             | 4.3 %             |
| 63Cu (KED)  | 6.220 ppb             | 3.1 %             |
| 64Zn (KED)  | 140.092 ppb           | 1.6 %             |
| 69Ga (KED)  | 0.868 ppb             | 4.9 %             |
| 75As (KED)  | 0.324 ppb             | 8.7 %             |
| 80Se (KED)  | 0.391 ppb             | 72.4 %            |
| 85Rb (KED)  | 1.056 ppb             | 3.2 %             |
| 88Sr (KED)  | 3.787 ppb             | 2.6 %             |
| 89Y (KED)   | 107.899 %             | 2.1 %             |
| 107Ag (KED) | 0.033 ppb             | 6.0 %             |
| 114Cd (KED) | 0.050 ppb             | 2.7 %             |
| 115In (KED) | 102.790 %             | 0.8 %             |
| 133Cs (KED) | 0.068 ppb             | 2.8 %             |
| 138Ba (KED) | 3.417 ppb             | 2.2 %             |
| 139La (KED) | 0.242 ppb             | 2.4 %             |
| 140Ce (KED) | 0.503 ppb             | 2.4 %             |
| 141Pr (KED) | 0.060 ppb             | 1.0 %             |
| 142Nd (KED) | 0.318 ppb             | 4.3 %             |
| 152Sm (KED) | 0.046 ppb             | 5.4 %             |
| 153Eu (KED) | 0.009 ppb             | 5.1 %             |
| 158Gd (KED) | 0.042 ppb             | 1.1 %             |
| 159Tb (KED) | 104.527 %             | 1.4 %             |
| 164Dy (KED) | 0.031 ppb             | 9.9 %             |
| 166Er (KED) | 0.014 ppb             | 6.8 %             |
| 169Tm (KED) | 0.002 ppb             | 13.6 %            |
| 174Yb (KED) | 0.013 ppb             | 7.5 %             |
| 175Lu (KED) | -0.014 ppb            | 24.8 %            |
| 205Tl (KED) | 0.007 ppb             | 9.3 %             |
| 208Pb (KED) | 0.561 ppb             | 0.6 %             |
| 209Bi (KED) | 89.202 %              | 1.1 %             |
| 232Th (KED) | 0.095 ppb             | 1.6 %             |
| 238U (KED)  | 0.029 ppb             | 2.1 %             |

| Category   | Concentration average | Intensity average | Intensity RSD |
|------------|-----------------------|-------------------|---------------|
| 6Li (KED)  | 111.824 %             | 2,775 cps         | 0.7 %         |
| 9Be (KED)  | 0.018 ppb             | 2 cps             | 173.2 %       |
| 11B (KED)  | -20.595 ppb           | 200 cps           | 8.8 %         |
| 24Mg (KED) | 252.475 ppb           | 120,189 cps       | 0.9 %         |
| 27Al (KED) | 301.453 ppb           | 36,082 cps        | 1.6 %         |

| Category    | Concentration average | Intensity average | Intensity RSD |
|-------------|-----------------------|-------------------|---------------|
| 45Sc (KED)  | 117.345 %             | 36,005 cps        | 2.9 %         |
| 51V (KED)   | 0.554 ppb             | 3,779 cps         | 2.7 %         |
| 52Cr (KED)  | 0.922 ppb             | 9,765 cps         | 3.6 %         |
| 55Mn (KED)  | 9.260 ppb             | 49,947 cps        | 1.4 %         |
| 56Fe (KED)  | 339.969 ppb           | 3,295,158 cps     | 0.6 %         |
| 58Ni (KED)  | 1.501 ppb             | 20,494 cps        | 0.5 %         |
| 59Co (KED)  | 0.171 ppb             | 3,577 cps         | 1.2 %         |
| 63Cu (KED)  | 6.220 ppb             | 87,997 cps        | 1.3 %         |
| 64Zn (KED)  | 140.092 ppb           | 510,008 cps       | 0.6 %         |
| 69Ga (KED)  | 0.868 ppb             | 4,175 cps         | 3.2 %         |
| 75As (KED)  | 0.324 ppb             | 360 cps           | 7.0 %         |
| 80Se (KED)  | 0.391 ppb             | 1,154 cps         | 8.4 %         |
| 85Rb (KED)  | 1.056 ppb             | 5,097 cps         | 2.6 %         |
| 88Sr (KED)  | 3.787 ppb             | 25,865 cps        | 1.7 %         |
| 89Y (KED)   | 107.899 %             | 319,502 cps       | 2.1 %         |
| 107Ag (KED) | 0.033 ppb             | 1,472 cps         | 5.1 %         |
| 114Cd (KED) | 0.050 ppb             | 860 cps           | 3.1 %         |
| 115In (KED) | 102.790 %             | 601,993 cps       | 0.8 %         |
| 133Cs (KED) | 0.068 ppb             | 1,728 cps         | 2.5 %         |
| 138Ba (KED) | 3.417 ppb             | 127,962 cps       | 0.8 %         |
| 139La (KED) | 0.242 ppb             | 19,061 cps        | 2.2 %         |
| 140Ce (KED) | 0.503 ppb             | 53,045 cps        | 1.0 %         |
| 141Pr (KED) | 0.060 ppb             | 6,755 cps         | 2.2 %         |
| 142Nd (KED) | 0.318 ppb             | 14,229 cps        | 5.2 %         |
| 152Sm (KED) | 0.046 ppb             | 1,958 cps         | 4.9 %         |
| 153Eu (KED) | 0.009 ppb             | 816 cps           | 4.8 %         |
| 158Gd (KED) | 0.042 ppb             | 2,497 cps         | 0.4 %         |
| 159Tb (KED) | 104.527 %             | 3,606,070 cps     | 1.4 %         |
| 164Dy (KED) | 0.031 ppb             | 2,056 cps         | 10.8 %        |
| 166Er (KED) | 0.014 ppb             | 1,337 cps         | 7.3 %         |
| 169Tm (KED) | 0.002 ppb             | 593 cps           | 14.5 %        |
| 174Yb (KED) | 0.013 ppb             | 1,261 cps         | 7.4 %         |
| 175Lu (KED) | -0.014 ppb            | 15,981 cps        | 2.1 %         |
| 205Tl (KED) | 0.007 ppb             | 1,328 cps         | 8.0 %         |
| 208Pb (KED) | 0.561 ppb             | 79,934 cps        | 1.4 %         |
| 209Bi (KED) | 89.202 %              | 2,955,097 cps     | 1.1 %         |
| 232Th (KED) | 0.095 ppb             | 24,352 cps        | 2.6 %         |
| 238U (KED)  | 0.029 ppb             | 8,878 cps         | 3.2 %         |

## Sample Summary

Instrument ID: iCAP Q

Analysis index: 24

Analysis name: 045668(179169)jian

Analysis started at: 9/28/2021 4:15:34 PM

User name: WINDOWS-UPCI4ER\Administrator

| Category    | Concentration average | Concentration RSD |
|-------------|-----------------------|-------------------|
| 6Li (KED)   | 112.585 %             | 4.1 %             |
| 9Be (KED)   | 0.017 ppb             | 173.2 %           |
| 11B (KED)   | -18.737 ppb           | 8.2 %             |
| 24Mg (KED)  | 409.596 ppb           | 3.9 %             |
| 27Al (KED)  | 514.736 ppb           | 1.3 %             |
| 45Sc (KED)  | 117.581 %             | 1.0 %             |
| 51V (KED)   | 0.998 ppb             | 1.9 %             |
| 52Cr (KED)  | 1.411 ppb             | 1.0 %             |
| 55Mn (KED)  | 15.626 ppb            | 0.9 %             |
| 56Fe (KED)  | 597.281 ppb           | 0.4 %             |
| 58Ni (KED)  | 2.833 ppb             | 1.4 %             |
| 59Co (KED)  | 0.282 ppb             | 2.6 %             |
| 63Cu (KED)  | 9.583 ppb             | 0.6 %             |
| 64Zn (KED)  | 136.439 ppb           | 1.2 %             |
| 69Ga (KED)  | 1.363 ppb             | 4.1 %             |
| 75As (KED)  | 0.475 ppb             | 1.8 %             |
| 80Se (KED)  | 0.127 ppb             | 161.7 %           |
| 85Rb (KED)  | 1.507 ppb             | 3.3 %             |
| 88Sr (KED)  | 5.460 ppb             | 1.8 %             |
| 89Y (KED)   | 111.311 %             | 0.9 %             |
| 107Ag (KED) | 0.122 ppb             | 3.2 %             |
| 114Cd (KED) | 0.045 ppb             | 9.2 %             |
| 115In (KED) | 102.115 %             | 0.7 %             |
| 133Cs (KED) | 0.117 ppb             | 0.2 %             |
| 138Ba (KED) | 5.387 ppb             | 2.7 %             |
| 139La (KED) | 0.442 ppb             | 2.1 %             |
| 140Ce (KED) | 0.934 ppb             | 1.2 %             |
| 141Pr (KED) | 0.107 ppb             | 2.7 %             |
| 142Nd (KED) | 0.589 ppb             | 2.2 %             |
| 152Sm (KED) | 0.083 ppb             | 2.2 %             |
| 153Eu (KED) | 0.016 ppb             | 11.5 %            |
| 158Gd (KED) | 0.074 ppb             | 3.7 %             |
| 159Tb (KED) | 106.496 %             | 2.4 %             |
| 164Dy (KED) | 0.053 ppb             | 2.4 %             |
| 166Er (KED) | 0.025 ppb             | 3.0 %             |
| 169Tm (KED) | 0.004 ppb             | 2.6 %             |
| 174Yb (KED) | 0.025 ppb             | 3.3 %             |
| 175Lu (KED) | -0.012 ppb            | 28.3 %            |
| 205Tl (KED) | 0.013 ppb             | 6.1 %             |
| 208Pb (KED) | 1.328 ppb             | 2.4 %             |
| 209Bi (KED) | 89.520 %              | 0.2 %             |
| 232Th (KED) | 0.174 ppb             | 1.2 %             |
| 238U (KED)  | 0.050 ppb             | 1.8 %             |

| Category   | Concentration average | Intensity average | Intensity RSD |
|------------|-----------------------|-------------------|---------------|
| 6Li (KED)  | 112.585 %             | 2,794 cps         | 4.1 %         |
| 9Be (KED)  | 0.017 ppb             | 2 cps             | 173.2 %       |
| 11B (KED)  | -18.737 ppb           | 318 cps           | 27.7 %        |
| 24Mg (KED) | 409.596 ppb           | 196,040 cps       | 1.2 %         |
| 27Al (KED) | 514.736 ppb           | 61,711 cps        | 0.6 %         |

| Category    | Concentration average | Intensity average | Intensity RSD |
|-------------|-----------------------|-------------------|---------------|
| 45Sc (KED)  | 117.581 %             | 36,078 cps        | 1.0 %         |
| 51V (KED)   | 0.998 ppb             | 6,819 cps         | 1.0 %         |
| 52Cr (KED)  | 1.411 ppb             | 14,907 cps        | 0.6 %         |
| 55Mn (KED)  | 15.626 ppb            | 84,480 cps        | 0.4 %         |
| 56Fe (KED)  | 597.281 ppb           | 5,801,632 cps     | 0.7 %         |
| 58Ni (KED)  | 2.833 ppb             | 36,653 cps        | 2.2 %         |
| 59Co (KED)  | 0.282 ppb             | 5,891 cps         | 1.9 %         |
| 63Cu (KED)  | 9.583 ppb             | 139,575 cps       | 0.3 %         |
| 64Zn (KED)  | 136.439 ppb           | 512,509 cps       | 0.4 %         |
| 69Ga (KED)  | 1.363 ppb             | 6,756 cps         | 3.3 %         |
| 75As (KED)  | 0.475 ppb             | 540 cps           | 2.7 %         |
| 80Se (KED)  | 0.127 ppb             | 1,101 cps         | 5.5 %         |
| 85Rb (KED)  | 1.507 ppb             | 7,496 cps         | 2.5 %         |
| 88Sr (KED)  | 5.460 ppb             | 38,427 cps        | 1.1 %         |
| 89Y (KED)   | 111.311 %             | 329,606 cps       | 0.9 %         |
| 107Ag (KED) | 0.122 ppb             | 5,352 cps         | 2.9 %         |
| 114Cd (KED) | 0.045 ppb             | 772 cps           | 7.9 %         |
| 115In (KED) | 102.115 %             | 598,042 cps       | 0.7 %         |
| 133Cs (KED) | 0.117 ppb             | 2,921 cps         | 0.9 %         |
| 138Ba (KED) | 5.387 ppb             | 205,065 cps       | 0.6 %         |
| 139La (KED) | 0.442 ppb             | 35,480 cps        | 1.1 %         |
| 140Ce (KED) | 0.934 ppb             | 100,309 cps       | 1.2 %         |
| 141Pr (KED) | 0.107 ppb             | 12,344 cps        | 0.6 %         |
| 142Nd (KED) | 0.589 ppb             | 26,791 cps        | 2.9 %         |
| 152Sm (KED) | 0.083 ppb             | 3,624 cps         | 4.3 %         |
| 153Eu (KED) | 0.016 ppb             | 1,437 cps         | 11.4 %        |
| 158Gd (KED) | 0.074 ppb             | 4,471 cps         | 6.0 %         |
| 159Tb (KED) | 106.496 %             | 3,673,988 cps     | 2.4 %         |
| 164Dy (KED) | 0.053 ppb             | 3,579 cps         | 0.1 %         |
| 166Er (KED) | 0.025 ppb             | 2,294 cps         | 2.4 %         |
| 169Tm (KED) | 0.004 ppb             | 1,036 cps         | 3.2 %         |
| 174Yb (KED) | 0.025 ppb             | 2,481 cps         | 2.8 %         |
| 175Lu (KED) | -0.012 ppb            | 16,502 cps        | 2.2 %         |
| 205Tl (KED) | 0.013 ppb             | 2,266 cps         | 6.1 %         |
| 208Pb (KED) | 1.328 ppb             | 173,407 cps       | 2.4 %         |
| 209Bi (KED) | 89.520 %              | 2,965,638 cps     | 0.2 %         |
| 232Th (KED) | 0.174 ppb             | 44,577 cps        | 1.3 %         |
| 238U (KED)  | 0.050 ppb             | 15,195 cps        | 2.0 %         |

## Sample Summary

Instrument ID: iCAP Q

Analysis index: 25

Analysis name: 051973(179157)jian

Analysis started at: 9/28/2021 4:19:05 PM

User name: WINDOWS-UPCI4ER\Administrator

| Category    | Concentration average | Concentration RSD |
|-------------|-----------------------|-------------------|
| 6Li (KED)   | 111.958 %             | 1.4 %             |
| 9Be (KED)   | 0.009 ppb             | 173.2 %           |
| 11B (KED)   | -14.541 ppb           | 2.4 %             |
| 24Mg (KED)  | 496.351 ppb           | 2.3 %             |
| 27Al (KED)  | 594.626 ppb           | 2.2 %             |
| 45Sc (KED)  | 117.516 %             | 2.3 %             |
| 51V (KED)   | 1.171 ppb             | 1.3 %             |
| 52Cr (KED)  | 1.370 ppb             | 3.2 %             |
| 55Mn (KED)  | 15.481 ppb            | 2.2 %             |
| 56Fe (KED)  | 668.000 ppb           | 1.5 %             |
| 58Ni (KED)  | 3.000 ppb             | 0.6 %             |
| 59Co (KED)  | 0.303 ppb             | 2.4 %             |
| 63Cu (KED)  | 6.669 ppb             | 1.3 %             |
| 64Zn (KED)  | 115.731 ppb           | 1.3 %             |
| 69Ga (KED)  | 1.389 ppb             | 1.6 %             |
| 75As (KED)  | 0.549 ppb             | 10.6 %            |
| 80Se (KED)  | 0.048 ppb             | 289.1 %           |
| 85Rb (KED)  | 2.162 ppb             | 3.2 %             |
| 88Sr (KED)  | 6.490 ppb             | 0.9 %             |
| 89Y (KED)   | 111.063 %             | 0.8 %             |
| 107Ag (KED) | 0.104 ppb             | 3.7 %             |
| 114Cd (KED) | 0.027 ppb             | 12.5 %            |
| 115In (KED) | 102.889 %             | 1.0 %             |
| 133Cs (KED) | 0.131 ppb             | 3.9 %             |
| 138Ba (KED) | 5.330 ppb             | 1.4 %             |
| 139La (KED) | 0.568 ppb             | 1.5 %             |
| 140Ce (KED) | 1.138 ppb             | 0.4 %             |
| 141Pr (KED) | 0.138 ppb             | 3.9 %             |
| 142Nd (KED) | 0.722 ppb             | 1.2 %             |
| 152Sm (KED) | 0.102 ppb             | 4.1 %             |
| 153Eu (KED) | 0.019 ppb             | 5.7 %             |
| 158Gd (KED) | 0.090 ppb             | 4.5 %             |
| 159Tb (KED) | 105.488 %             | 0.9 %             |
| 164Dy (KED) | 0.064 ppb             | 4.9 %             |
| 166Er (KED) | 0.031 ppb             | 1.5 %             |
| 169Tm (KED) | 0.004 ppb             | 6.0 %             |
| 174Yb (KED) | 0.025 ppb             | 2.5 %             |
| 175Lu (KED) | -0.012 ppb            | 18.4 %            |
| 205Tl (KED) | 0.013 ppb             | 5.0 %             |
| 208Pb (KED) | 0.963 ppb             | 1.9 %             |
| 209Bi (KED) | 88.640 %              | 1.3 %             |
| 232Th (KED) | 0.216 ppb             | 1.5 %             |
| 238U (KED)  | 0.052 ppb             | 1.7 %             |

| Category   | Concentration average | Intensity average | Intensity RSD |
|------------|-----------------------|-------------------|---------------|
| 6Li (KED)  | 111.958 %             | 2,778 cps         | 1.4 %         |
| 9Be (KED)  | 0.009 ppb             | 1 cps             | 173.2 %       |
| 11B (KED)  | -14.541 ppb           | 586 cps           | 3.7 %         |
| 24Mg (KED) | 496.351 ppb           | 236,412 cps       | 1.0 %         |
| 27Al (KED) | 594.626 ppb           | 71,222 cps        | 1.0 %         |

| Category    | Concentration average | Intensity average | Intensity RSD |
|-------------|-----------------------|-------------------|---------------|
| 45Sc (KED)  | 117.516 %             | 36,058 cps        | 2.3 %         |
| 51V (KED)   | 1.171 ppb             | 8,000 cps         | 1.8 %         |
| 52Cr (KED)  | 1.370 ppb             | 14,463 cps        | 0.8 %         |
| 55Mn (KED)  | 15.481 ppb            | 83,643 cps        | 2.4 %         |
| 56Fe (KED)  | 668.000 ppb           | 6,483,840 cps     | 1.8 %         |
| 58Ni (KED)  | 3.000 ppb             | 38,636 cps        | 1.8 %         |
| 59Co (KED)  | 0.303 ppb             | 6,312 cps         | 3.3 %         |
| 63Cu (KED)  | 6.669 ppb             | 97,102 cps        | 0.8 %         |
| 64Zn (KED)  | 115.731 ppb           | 433,873 cps       | 0.6 %         |
| 69Ga (KED)  | 1.389 ppb             | 6,867 cps         | 1.1 %         |
| 75As (KED)  | 0.549 ppb             | 621 cps           | 9.7 %         |
| 80Se (KED)  | 0.048 ppb             | 1,072 cps         | 4.2 %         |
| 85Rb (KED)  | 2.162 ppb             | 10,729 cps        | 3.4 %         |
| 88Sr (KED)  | 6.490 ppb             | 45,564 cps        | 1.7 %         |
| 89Y (KED)   | 111.063 %             | 328,870 cps       | 0.8 %         |
| 107Ag (KED) | 0.104 ppb             | 4,623 cps         | 3.4 %         |
| 114Cd (KED) | 0.027 ppb             | 488 cps           | 10.5 %        |
| 115In (KED) | 102.889 %             | 602,573 cps       | 1.0 %         |
| 133Cs (KED) | 0.131 ppb             | 3,292 cps         | 3.9 %         |
| 138Ba (KED) | 5.330 ppb             | 201,072 cps       | 1.5 %         |
| 139La (KED) | 0.568 ppb             | 45,147 cps        | 0.6 %         |
| 140Ce (KED) | 1.138 ppb             | 121,018 cps       | 0.6 %         |
| 141Pr (KED) | 0.138 ppb             | 15,715 cps        | 3.3 %         |
| 142Nd (KED) | 0.722 ppb             | 32,525 cps        | 1.5 %         |
| 152Sm (KED) | 0.102 ppb             | 4,415 cps         | 4.3 %         |
| 153Eu (KED) | 0.019 ppb             | 1,673 cps         | 5.2 %         |
| 158Gd (KED) | 0.090 ppb             | 5,393 cps         | 4.1 %         |
| 159Tb (KED) | 105.488 %             | 3,639,224 cps     | 0.9 %         |
| 164Dy (KED) | 0.064 ppb             | 4,313 cps         | 4.9 %         |
| 166Er (KED) | 0.031 ppb             | 2,713 cps         | 0.6 %         |
| 169Tm (KED) | 0.004 ppb             | 1,152 cps         | 5.7 %         |
| 174Yb (KED) | 0.025 ppb             | 2,471 cps         | 2.0 %         |
| 175Lu (KED) | -0.012 ppb            | 16,455 cps        | 2.5 %         |
| 205Tl (KED) | 0.013 ppb             | 2,381 cps         | 3.9 %         |
| 208Pb (KED) | 0.963 ppb             | 127,742 cps       | 0.4 %         |
| 209Bi (KED) | 88.640 %              | 2,936,481 cps     | 1.3 %         |
| 232Th (KED) | 0.216 ppb             | 54,854 cps        | 0.7 %         |
| 238U (KED)  | 0.052 ppb             | 15,752 cps        | 0.6 %         |

## Sample Summary

Instrument ID: iCAP Q

Analysis index: 26

Analysis name: 051890(179221)jian

Analysis started at: 9/28/2021 4:22:38 PM

User name: WINDOWS-UPCI4ER\Administrator

| Category    | Concentration average | Concentration RSD |
|-------------|-----------------------|-------------------|
| 6Li (KED)   | 114.870 %             |                   |
| 9Be (KED)   | 0.000 ppb             |                   |
| 11B (KED)   | -19.709 ppb           |                   |
| 24Mg (KED)  | 461.640 ppb           |                   |
| 27Al (KED)  | 557.482 ppb           |                   |
| 45Sc (KED)  | 121.137 %             |                   |
| 51V (KED)   | 1.112 ppb             |                   |
| 52Cr (KED)  | 1.187 ppb             |                   |
| 55Mn (KED)  | 15.830 ppb            |                   |
| 56Fe (KED)  | 617.121 ppb           |                   |
| 58Ni (KED)  | 2.859 ppb             |                   |
| 59Co (KED)  | 0.265 ppb             |                   |
| 63Cu (KED)  | 6.458 ppb             |                   |
| 64Zn (KED)  | 115.959 ppb           |                   |
| 69Ga (KED)  | 1.721 ppb             |                   |
| 75As (KED)  | 0.544 ppb             |                   |
| 80Se (KED)  | 0.244 ppb             |                   |
| 85Rb (KED)  | 1.834 ppb             |                   |
| 88Sr (KED)  | 6.923 ppb             |                   |
| 89Y (KED)   | 109.908 %             |                   |
| 107Ag (KED) | 0.039 ppb             |                   |
| 114Cd (KED) | 0.029 ppb             |                   |
| 115In (KED) | 102.449 %             |                   |
| 133Cs (KED) | 0.127 ppb             |                   |
| 138Ba (KED) | 5.895 ppb             |                   |
| 139La (KED) | 0.606 ppb             |                   |
| 140Ce (KED) | 1.212 ppb             |                   |
| 141Pr (KED) | 0.144 ppb             |                   |
| 142Nd (KED) | 0.747 ppb             |                   |
| 152Sm (KED) | 0.103 ppb             |                   |
| 153Eu (KED) | 0.019 ppb             |                   |
| 158Gd (KED) | 0.088 ppb             |                   |
| 159Tb (KED) | 102.459 %             |                   |
| 164Dy (KED) | 0.058 ppb             |                   |
| 166Er (KED) | 0.028 ppb             |                   |
| 169Tm (KED) | 0.003 ppb             |                   |
| 174Yb (KED) | 0.023 ppb             |                   |
| 175Lu (KED) | -0.009 ppb            |                   |
| 205Tl (KED) | 0.014 ppb             |                   |
| 208Pb (KED) | 0.827 ppb             |                   |
| 209Bi (KED) | 89.033 %              |                   |
| 232Th (KED) | 0.196 ppb             |                   |
| 238U (KED)  | 0.046 ppb             |                   |

| Category   | Concentration average | Intensity average | Intensity RSD |
|------------|-----------------------|-------------------|---------------|
| 6Li (KED)  | 114.870 %             | 2,850 cps         |               |
| 9Be (KED)  | 0.000 ppb             | 0 cps             |               |
| 11B (KED)  | -19.709 ppb           | 263 cps           |               |
| 24Mg (KED) | 461.640 ppb           | 225,651 cps       |               |
| 27Al (KED) | 557.482 ppb           | 68,856 cps        |               |

| Category    | Concentration average | Intensity average | Intensity RSD |
|-------------|-----------------------|-------------------|---------------|
| 45Sc (KED)  | 121.137 %             | 37,169 cps        |               |
| 51V (KED)   | 1.112 ppb             | 7,832 cps         |               |
| 52Cr (KED)  | 1.187 ppb             | 12,947 cps        |               |
| 55Mn (KED)  | 15.830 ppb            | 88,177 cps        |               |
| 56Fe (KED)  | 617.121 ppb           | 6,175,650 cps     |               |
| 58Ni (KED)  | 2.859 ppb             | 38,081 cps        |               |
| 59Co (KED)  | 0.265 ppb             | 5,708 cps         |               |
| 63Cu (KED)  | 6.458 ppb             | 93,076 cps        |               |
| 64Zn (KED)  | 115.959 ppb           | 430,233 cps       |               |
| 69Ga (KED)  | 1.721 ppb             | 8,417 cps         |               |
| 75As (KED)  | 0.544 ppb             | 610 cps           |               |
| 80Se (KED)  | 0.244 ppb             | 1,127 cps         |               |
| 85Rb (KED)  | 1.834 ppb             | 9,010 cps         |               |
| 88Sr (KED)  | 6.923 ppb             | 48,090 cps        |               |
| 89Y (KED)   | 109.908 %             | 325,449 cps       |               |
| 107Ag (KED) | 0.039 ppb             | 1,763 cps         |               |
| 114Cd (KED) | 0.029 ppb             | 513 cps           |               |
| 115In (KED) | 102.449 %             | 600,000 cps       |               |
| 133Cs (KED) | 0.127 ppb             | 3,184 cps         |               |
| 138Ba (KED) | 5.895 ppb             | 215,904 cps       |               |
| 139La (KED) | 0.606 ppb             | 46,784 cps        |               |
| 140Ce (KED) | 1.212 ppb             | 125,128 cps       |               |
| 141Pr (KED) | 0.144 ppb             | 15,907 cps        |               |
| 142Nd (KED) | 0.747 ppb             | 32,683 cps        |               |
| 152Sm (KED) | 0.103 ppb             | 4,337 cps         |               |
| 153Eu (KED) | 0.019 ppb             | 1,600 cps         |               |
| 158Gd (KED) | 0.088 ppb             | 5,151 cps         |               |
| 159Tb (KED) | 102.459 %             | 3,534,727 cps     |               |
| 164Dy (KED) | 0.058 ppb             | 3,804 cps         |               |
| 166Er (KED) | 0.028 ppb             | 2,430 cps         |               |
| 169Tm (KED) | 0.003 ppb             | 910 cps           |               |
| 174Yb (KED) | 0.023 ppb             | 2,214 cps         |               |
| 175Lu (KED) | -0.009 ppb            | 16,384 cps        |               |
| 205Tl (KED) | 0.014 ppb             | 2,537 cps         |               |
| 208Pb (KED) | 0.827 ppb             | 111,914 cps       |               |
| 209Bi (KED) | 89.033 %              | 2,949,496 cps     |               |
| 232Th (KED) | 0.196 ppb             | 49,983 cps        |               |
| 238U (KED)  | 0.046 ppb             | 14,071 cps        |               |

## Sample Summary

Instrument ID: iCAP Q

Analysis index: 27

Analysis name: 179156jian

Analysis started at: 9/28/2021 4:24:45 PM

User name: WINDOWS-UPCI4ER\Administrator

| Category    | Concentration average | Concentration RSD |
|-------------|-----------------------|-------------------|
| 6Li (KED)   | 112.720 %             |                   |
| 9Be (KED)   | 0.026 ppb             |                   |
| 11B (KED)   | -15.055 ppb           |                   |
| 24Mg (KED)  | 639.251 ppb           |                   |
| 27Al (KED)  | 738.454 ppb           |                   |
| 45Sc (KED)  | 119.393 %             |                   |
| 51V (KED)   | 1.446 ppb             |                   |
| 52Cr (KED)  | 1.554 ppb             |                   |
| 55Mn (KED)  | 22.241 ppb            |                   |
| 56Fe (KED)  | 844.019 ppb           |                   |
| 58Ni (KED)  | 3.610 ppb             |                   |
| 59Co (KED)  | 0.398 ppb             |                   |
| 63Cu (KED)  | 9.199 ppb             |                   |
| 64Zn (KED)  | 137.996 ppb           |                   |
| 69Ga (KED)  | 1.820 ppb             |                   |
| 75As (KED)  | 0.683 ppb             |                   |
| 80Se (KED)  | -0.094 ppb            |                   |
| 85Rb (KED)  | 1.973 ppb             |                   |
| 88Sr (KED)  | 8.351 ppb             |                   |
| 89Y (KED)   | 111.359 %             |                   |
| 107Ag (KED) | 0.056 ppb             |                   |
| 114Cd (KED) | 0.047 ppb             |                   |
| 115In (KED) | 101.664 %             |                   |
| 133Cs (KED) | 0.173 ppb             |                   |
| 138Ba (KED) | 7.308 ppb             |                   |
| 139La (KED) | 0.651 ppb             |                   |
| 140Ce (KED) | 1.305 ppb             |                   |
| 141Pr (KED) | 0.150 ppb             |                   |
| 142Nd (KED) | 0.841 ppb             |                   |
| 152Sm (KED) | 0.126 ppb             |                   |
| 153Eu (KED) | 0.023 ppb             |                   |
| 158Gd (KED) | 0.106 ppb             |                   |
| 159Tb (KED) | 103.356 %             |                   |
| 164Dy (KED) | 0.076 ppb             |                   |
| 166Er (KED) | 0.037 ppb             |                   |
| 169Tm (KED) | 0.005 ppb             |                   |
| 174Yb (KED) | 0.031 ppb             |                   |
| 175Lu (KED) | -0.014 ppb            |                   |
| 205Tl (KED) | 0.018 ppb             |                   |
| 208Pb (KED) | 1.602 ppb             |                   |
| 209Bi (KED) | 85.179 %              |                   |
| 232Th (KED) | 0.246 ppb             |                   |
| 238U (KED)  | 0.070 ppb             |                   |

| Category   | Concentration average | Intensity average | Intensity RSD |
|------------|-----------------------|-------------------|---------------|
| 6Li (KED)  | 112.720 %             | 2,797 cps         |               |
| 9Be (KED)  | 0.026 ppb             | 3 cps             |               |
| 11B (KED)  | -15.055 ppb           | 557 cps           |               |
| 24Mg (KED) | 639.251 ppb           | 306,578 cps       |               |
| 27Al (KED) | 738.454 ppb           | 89,872 cps        |               |

| Category    | Concentration average | Intensity average | Intensity RSD |
|-------------|-----------------------|-------------------|---------------|
| 45Sc (KED)  | 119.393 %             | 36,634 cps        |               |
| 51V (KED)   | 1.446 ppb             | 10,034 cps        |               |
| 52Cr (KED)  | 1.554 ppb             | 16,658 cps        |               |
| 55Mn (KED)  | 22.241 ppb            | 122,084 cps       |               |
| 56Fe (KED)  | 844.019 ppb           | 8,323,808 cps     |               |
| 58Ni (KED)  | 3.610 ppb             | 46,754 cps        |               |
| 59Co (KED)  | 0.398 ppb             | 8,410 cps         |               |
| 63Cu (KED)  | 9.199 ppb             | 134,062 cps       |               |
| 64Zn (KED)  | 137.996 ppb           | 518,610 cps       |               |
| 69Ga (KED)  | 1.820 ppb             | 9,020 cps         |               |
| 75As (KED)  | 0.683 ppb             | 773 cps           |               |
| 80Se (KED)  | -0.094 ppb            | 1,027 cps         |               |
| 85Rb (KED)  | 1.973 ppb             | 9,821 cps         |               |
| 88Sr (KED)  | 8.351 ppb             | 58,751 cps        |               |
| 89Y (KED)   | 111.359 %             | 329,747 cps       |               |
| 107Ag (KED) | 0.056 ppb             | 2,467 cps         |               |
| 114Cd (KED) | 0.047 ppb             | 790 cps           |               |
| 115In (KED) | 101.664 %             | 595,400 cps       |               |
| 133Cs (KED) | 0.173 ppb             | 4,301 cps         |               |
| 138Ba (KED) | 7.308 ppb             | 269,798 cps       |               |
| 139La (KED) | 0.651 ppb             | 50,719 cps        |               |
| 140Ce (KED) | 1.305 ppb             | 135,927 cps       |               |
| 141Pr (KED) | 0.150 ppb             | 16,745 cps        |               |
| 142Nd (KED) | 0.841 ppb             | 37,142 cps        |               |
| 152Sm (KED) | 0.126 ppb             | 5,331 cps         |               |
| 153Eu (KED) | 0.023 ppb             | 1,920 cps         |               |
| 158Gd (KED) | 0.106 ppb             | 6,225 cps         |               |
| 159Tb (KED) | 103.356 %             | 3,565,678 cps     |               |
| 164Dy (KED) | 0.076 ppb             | 5,021 cps         |               |
| 166Er (KED) | 0.037 ppb             | 3,147 cps         |               |
| 169Tm (KED) | 0.005 ppb             | 1,437 cps         |               |
| 174Yb (KED) | 0.031 ppb             | 2,990 cps         |               |
| 175Lu (KED) | -0.014 ppb            | 15,727 cps        |               |
| 205Tl (KED) | 0.018 ppb             | 3,110 cps         |               |
| 208Pb (KED) | 1.602 ppb             | 196,611 cps       |               |
| 209Bi (KED) | 85.179 %              | 2,821,831 cps     |               |
| 232Th (KED) | 0.246 ppb             | 60,004 cps        |               |
| 238U (KED)  | 0.070 ppb             | 20,307 cps        |               |

## Sample Summary

Instrument ID: iCAP Q

Analysis index: 28

Analysis name: 024757(179205)jian

Analysis started at: 9/28/2021 4:27:18 PM

User name: WINDOWS-UPCI4ER\Administrator

| Category    | Concentration average | Concentration RSD |
|-------------|-----------------------|-------------------|
| 6Li (KED)   | 110.973 %             |                   |
| 9Be (KED)   | 0.000 ppb             |                   |
| 11B (KED)   | -14.812 ppb           |                   |
| 24Mg (KED)  | 736.531 ppb           |                   |
| 27Al (KED)  | 870.375 ppb           |                   |
| 45Sc (KED)  | 119.317 %             |                   |
| 51V (KED)   | 1.714 ppb             |                   |
| 52Cr (KED)  | 2.492 ppb             |                   |
| 55Mn (KED)  | 25.325 ppb            |                   |
| 56Fe (KED)  | 1,034.631 ppb         |                   |
| 58Ni (KED)  | 4.822 ppb             |                   |
| 59Co (KED)  | 0.458 ppb             |                   |
| 63Cu (KED)  | 7.324 ppb             |                   |
| 64Zn (KED)  | 133.728 ppb           |                   |
| 69Ga (KED)  | 2.427 ppb             |                   |
| 75As (KED)  | 0.625 ppb             |                   |
| 80Se (KED)  | -0.237 ppb            |                   |
| 85Rb (KED)  | 2.431 ppb             |                   |
| 88Sr (KED)  | 9.397 ppb             |                   |
| 89Y (KED)   | 114.196 %             |                   |
| 107Ag (KED) | 0.068 ppb             |                   |
| 114Cd (KED) | 0.032 ppb             |                   |
| 115In (KED) | 102.857 %             |                   |
| 133Cs (KED) | 0.192 ppb             |                   |
| 138Ba (KED) | 9.440 ppb             |                   |
| 139La (KED) | 0.823 ppb             |                   |
| 140Ce (KED) | 1.666 ppb             |                   |
| 141Pr (KED) | 0.204 ppb             |                   |
| 142Nd (KED) | 1.053 ppb             |                   |
| 152Sm (KED) | 0.159 ppb             |                   |
| 153Eu (KED) | 0.030 ppb             |                   |
| 158Gd (KED) | 0.142 ppb             |                   |
| 159Tb (KED) | 108.452 %             |                   |
| 164Dy (KED) | 0.102 ppb             |                   |
| 166Er (KED) | 0.048 ppb             |                   |
| 169Tm (KED) | 0.006 ppb             |                   |
| 174Yb (KED) | 0.039 ppb             |                   |
| 175Lu (KED) | -0.013 ppb            |                   |
| 205Tl (KED) | 0.018 ppb             |                   |
| 208Pb (KED) | 1.545 ppb             |                   |
| 209Bi (KED) | 84.638 %              |                   |
| 232Th (KED) | 0.350 ppb             |                   |
| 238U (KED)  | 0.078 ppb             |                   |

| Category   | Concentration average | Intensity average | Intensity RSD |
|------------|-----------------------|-------------------|---------------|
| 6Li (KED)  | 110.973 %             | 2,754 cps         |               |
| 9Be (KED)  | 0.000 ppb             | 0 cps             |               |
| 11B (KED)  | -14.812 ppb           | 563 cps           |               |
| 24Mg (KED) | 736.531 ppb           | 347,741 cps       |               |
| 27Al (KED) | 870.375 ppb           | 105,847 cps       |               |

| Category    | Concentration average | Intensity average | Intensity RSD |
|-------------|-----------------------|-------------------|---------------|
| 45Sc (KED)  | 119.317 %             | 36,610 cps        |               |
| 51V (KED)   | 1.714 ppb             | 11,886 cps        |               |
| 52Cr (KED)  | 2.492 ppb             | 26,612 cps        |               |
| 55Mn (KED)  | 25.325 ppb            | 138,915 cps       |               |
| 56Fe (KED)  | 1,034.631 ppb         | 10,196,607 cps    |               |
| 58Ni (KED)  | 4.822 ppb             | 61,595 cps        |               |
| 59Co (KED)  | 0.458 ppb             | 9,664 cps         |               |
| 63Cu (KED)  | 7.324 ppb             | 109,592 cps       |               |
| 64Zn (KED)  | 133.728 ppb           | 515,397 cps       |               |
| 69Ga (KED)  | 2.427 ppb             | 12,326 cps        |               |
| 75As (KED)  | 0.625 ppb             | 727 cps           |               |
| 80Se (KED)  | -0.237 ppb            | 1,003 cps         |               |
| 85Rb (KED)  | 2.431 ppb             | 12,403 cps        |               |
| 88Sr (KED)  | 9.397 ppb             | 67,777 cps        |               |
| 89Y (KED)   | 114.196 %             | 338,147 cps       |               |
| 107Ag (KED) | 0.068 ppb             | 3,024 cps         |               |
| 114Cd (KED) | 0.032 ppb             | 563 cps           |               |
| 115In (KED) | 102.857 %             | 602,390 cps       |               |
| 133Cs (KED) | 0.192 ppb             | 4,811 cps         |               |
| 138Ba (KED) | 9.440 ppb             | 365,486 cps       |               |
| 139La (KED) | 0.823 ppb             | 67,261 cps        |               |
| 140Ce (KED) | 1.666 ppb             | 182,134 cps       |               |
| 141Pr (KED) | 0.204 ppb             | 23,946 cps        |               |
| 142Nd (KED) | 1.053 ppb             | 48,805 cps        |               |
| 152Sm (KED) | 0.159 ppb             | 7,052 cps         |               |
| 153Eu (KED) | 0.030 ppb             | 2,660 cps         |               |
| 158Gd (KED) | 0.142 ppb             | 8,746 cps         |               |
| 159Tb (KED) | 108.452 %             | 3,741,493 cps     |               |
| 164Dy (KED) | 0.102 ppb             | 7,059 cps         |               |
| 166Er (KED) | 0.048 ppb             | 4,241 cps         |               |
| 169Tm (KED) | 0.006 ppb             | 1,850 cps         |               |
| 174Yb (KED) | 0.039 ppb             | 3,947 cps         |               |
| 175Lu (KED) | -0.013 ppb            | 16,741 cps        |               |
| 205Tl (KED) | 0.018 ppb             | 2,997 cps         |               |
| 208Pb (KED) | 1.545 ppb             | 188,892 cps       |               |
| 209Bi (KED) | 84.638 %              | 2,803,908 cps     |               |
| 232Th (KED) | 0.350 ppb             | 84,985 cps        |               |
| 238U (KED)  | 0.078 ppb             | 22,400 cps        |               |

## Sample Summary

Instrument ID: iCAP Q

Analysis index: 29

Analysis name: 041629(179209)jian

Analysis started at: 9/28/2021 4:29:22 PM

User name: WINDOWS-UPCI4ER\Administrator

| Category    | Concentration average | Concentration RSD |
|-------------|-----------------------|-------------------|
| 6Li (KED)   | 110.435 %             |                   |
| 9Be (KED)   | 0.080 ppb             |                   |
| 11B (KED)   | -18.804 ppb           |                   |
| 24Mg (KED)  | 625.934 ppb           |                   |
| 27Al (KED)  | 698.102 ppb           |                   |
| 45Sc (KED)  | 118.511 %             |                   |
| 51V (KED)   | 1.449 ppb             |                   |
| 52Cr (KED)  | 2.024 ppb             |                   |
| 55Mn (KED)  | 20.867 ppb            |                   |
| 56Fe (KED)  | 859.103 ppb           |                   |
| 58Ni (KED)  | 3.845 ppb             |                   |
| 59Co (KED)  | 0.363 ppb             |                   |
| 63Cu (KED)  | 7.999 ppb             |                   |
| 64Zn (KED)  | 123.464 ppb           |                   |
| 69Ga (KED)  | 1.772 ppb             |                   |
| 75As (KED)  | 0.559 ppb             |                   |
| 80Se (KED)  | 0.543 ppb             |                   |
| 85Rb (KED)  | 1.812 ppb             |                   |
| 88Sr (KED)  | 8.425 ppb             |                   |
| 89Y (KED)   | 111.664 %             |                   |
| 107Ag (KED) | 0.047 ppb             |                   |
| 114Cd (KED) | 0.062 ppb             |                   |
| 115In (KED) | 102.563 %             |                   |
| 133Cs (KED) | 0.162 ppb             |                   |
| 138Ba (KED) | 7.189 ppb             |                   |
| 139La (KED) | 0.722 ppb             |                   |
| 140Ce (KED) | 1.483 ppb             |                   |
| 141Pr (KED) | 0.171 ppb             |                   |
| 142Nd (KED) | 0.908 ppb             |                   |
| 152Sm (KED) | 0.124 ppb             |                   |
| 153Eu (KED) | 0.024 ppb             |                   |
| 158Gd (KED) | 0.111 ppb             |                   |
| 159Tb (KED) | 103.801 %             |                   |
| 164Dy (KED) | 0.081 ppb             |                   |
| 166Er (KED) | 0.038 ppb             |                   |
| 169Tm (KED) | 0.006 ppb             |                   |
| 174Yb (KED) | 0.039 ppb             |                   |
| 175Lu (KED) | -0.006 ppb            |                   |
| 205Tl (KED) | 0.014 ppb             |                   |
| 208Pb (KED) | 1.202 ppb             |                   |
| 209Bi (KED) | 87.633 %              |                   |
| 232Th (KED) | 0.312 ppb             |                   |
| 238U (KED)  | 0.068 ppb             |                   |

| Category   | Concentration average | Intensity average | Intensity RSD |
|------------|-----------------------|-------------------|---------------|
| 6Li (KED)  | 110.435 %             | 2,740 cps         |               |
| 9Be (KED)  | 0.080 ppb             | 10 cps            |               |
| 11B (KED)  | -18.804 ppb           | 310 cps           |               |
| 24Mg (KED) | 625.934 ppb           | 294,110 cps       |               |
| 27Al (KED) | 698.102 ppb           | 84,337 cps        |               |

| Category    | Concentration average | Intensity average | Intensity RSD |
|-------------|-----------------------|-------------------|---------------|
| 45Sc (KED)  | 118.511 %             | 36,363 cps        |               |
| 51V (KED)   | 1.449 ppb             | 9,981 cps         |               |
| 52Cr (KED)  | 2.024 ppb             | 21,495 cps        |               |
| 55Mn (KED)  | 20.867 ppb            | 113,698 cps       |               |
| 56Fe (KED)  | 859.103 ppb           | 8,409,912 cps     |               |
| 58Ni (KED)  | 3.845 ppb             | 49,274 cps        |               |
| 59Co (KED)  | 0.363 ppb             | 7,622 cps         |               |
| 63Cu (KED)  | 7.999 ppb             | 116,976 cps       |               |
| 64Zn (KED)  | 123.464 ppb           | 465,347 cps       |               |
| 69Ga (KED)  | 1.772 ppb             | 8,803 cps         |               |
| 75As (KED)  | 0.559 ppb             | 637 cps           |               |
| 80Se (KED)  | 0.543 ppb             | 1,247 cps         |               |
| 85Rb (KED)  | 1.812 ppb             | 9,040 cps         |               |
| 88Sr (KED)  | 8.425 ppb             | 59,435 cps        |               |
| 89Y (KED)   | 111.664 %             | 330,649 cps       |               |
| 107Ag (KED) | 0.047 ppb             | 2,087 cps         |               |
| 114Cd (KED) | 0.062 ppb             | 1,047 cps         |               |
| 115In (KED) | 102.563 %             | 600,665 cps       |               |
| 133Cs (KED) | 0.162 ppb             | 4,064 cps         |               |
| 138Ba (KED) | 7.189 ppb             | 266,586 cps       |               |
| 139La (KED) | 0.722 ppb             | 56,417 cps        |               |
| 140Ce (KED) | 1.483 ppb             | 155,122 cps       |               |
| 141Pr (KED) | 0.171 ppb             | 19,178 cps        |               |
| 142Nd (KED) | 0.908 ppb             | 40,262 cps        |               |
| 152Sm (KED) | 0.124 ppb             | 5,274 cps         |               |
| 153Eu (KED) | 0.024 ppb             | 2,080 cps         |               |
| 158Gd (KED) | 0.111 ppb             | 6,575 cps         |               |
| 159Tb (KED) | 103.801 %             | 3,581,043 cps     |               |
| 164Dy (KED) | 0.081 ppb             | 5,331 cps         |               |
| 166Er (KED) | 0.038 ppb             | 3,227 cps         |               |
| 169Tm (KED) | 0.006 ppb             | 1,513 cps         |               |
| 174Yb (KED) | 0.039 ppb             | 3,821 cps         |               |
| 175Lu (KED) | -0.006 ppb            | 17,042 cps        |               |
| 205Tl (KED) | 0.014 ppb             | 2,390 cps         |               |
| 208Pb (KED) | 1.202 ppb             | 154,733 cps       |               |
| 209Bi (KED) | 87.633 %              | 2,903,120 cps     |               |
| 232Th (KED) | 0.312 ppb             | 78,345 cps        |               |
| 238U (KED)  | 0.068 ppb             | 20,330 cps        |               |
