# Supplementary material for: Geographic and breed-specific traceability of cashmere via mineral element profiling in Inner Mongolia (Ordos, Chifeng, and Alxa League)
Source: Royal Society of Chemistry journal article supplement (doi:10.1039/d5ra08122j), 2026-01-01
Supplement: d5ra08122j1.zip [file 20210930-a you qi ya bu lai zhen(1-7)+a you qi ba yan gao le (8-23)+min gai(24).pdf › ԭʼ޿/20210930-a you qi ya bu lai zhen(1-7)+a you qi ba yan gao le (8-23)+min gai(24).pdf]

## Instrument Summary:

Instrument ID: iCAP Q  
Serial Number: Undefined

## Labbook Summary:

Path and filename: \_Application Data\Workspace\LabBooks\wlw\20210930-1.imexp  
Labbook created by: Administrator  
Based on template:  
Hardware configuration: iCAPQ1  
Labbook type: eQuant  
Qtegra version (last saved): 2.7.2425.154  
Labbook started: 9/30/2021 11:27:28 AM  
Labbook finished: 9/30/2021 2:02:14 PM

## Method Summary:

| Isotope     | Mode | Dwell time (s) | # of Channels | Spacing | Resolution | IS          |
|-------------|------|----------------|---------------|---------|------------|-------------|
| 6Li (KED)   | KED  | 0.03           | 3             | 0.1     | Normal     |             |
| 9Be (KED)   | KED  | 0.03           | 3             | 0.1     | Normal     | 6Li (KED)   |
| 11B (KED)   | KED  | 0.03           | 3             | 0.1     | Normal     | 6Li (KED)   |
| 24Mg (KED)  | KED  | 0.03           | 3             | 0.1     | Normal     | 6Li (KED)   |
| 27Al (KED)  | KED  | 0.03           | 3             | 0.1     | Normal     | 45Sc (KED)  |
| 45Sc (KED)  | KED  | 0.03           | 3             | 0.1     | Normal     |             |
| 51V (KED)   | KED  | 0.03           | 3             | 0.1     | Normal     | 45Sc (KED)  |
| 52Cr (KED)  | KED  | 0.03           | 3             | 0.1     | Normal     | 45Sc (KED)  |
| 55Mn (KED)  | KED  | 0.03           | 3             | 0.1     | Normal     | 45Sc (KED)  |
| 56Fe (KED)  | KED  | 0.03           | 3             | 0.1     | Normal     | 45Sc (KED)  |
| 58Ni (KED)  | KED  | 0.03           | 3             | 0.1     | Normal     | 45Sc (KED)  |
| 59Co (KED)  | KED  | 0.03           | 3             | 0.1     | Normal     | 45Sc (KED)  |
| 63Cu (KED)  | KED  | 0.03           | 3             | 0.1     | Normal     | 89Y (KED)   |
| 64Zn (KED)  | KED  | 0.03           | 3             | 0.1     | Normal     | 89Y (KED)   |
| 69Ga (KED)  | KED  | 0.03           | 3             | 0.1     | Normal     | 89Y (KED)   |
| 75As (KED)  | KED  | 0.03           | 3             | 0.1     | Normal     | 89Y (KED)   |
| 80Se (KED)  | KED  | 0.03           | 3             | 0.1     | Normal     | 89Y (KED)   |
| 85Rb (KED)  | KED  | 0.03           | 3             | 0.1     | Normal     | 89Y (KED)   |
| 88Sr (KED)  | KED  | 0.03           | 3             | 0.1     | Normal     | 89Y (KED)   |
| 89Y (KED)   | KED  | 0.03           | 3             | 0.1     | Normal     |             |
| 107Ag (KED) | KED  | 0.03           | 3             | 0.1     | Normal     | 115In (KED) |
| 114Cd (KED) | KED  | 0.03           | 3             | 0.1     | Normal     | 115In (KED) |
| 115In (KED) | KED  | 0.03           | 3             | 0.1     | Normal     |             |
| 133Cs (KED) | KED  | 0.03           | 3             | 0.1     | Normal     | 115In (KED) |
| 138Ba (KED) | KED  | 0.03           | 3             | 0.1     | Normal     | 159Tb (KED) |
| 139La (KED) | KED  | 0.03           | 3             | 0.1     | Normal     | 159Tb (KED) |
| 140Ce (KED) | KED  | 0.03           | 3             | 0.1     | Normal     | 159Tb (KED) |
| 141Pr (KED) | KED  | 0.03           | 3             | 0.1     | Normal     | 159Tb (KED) |
| 142Nd (KED) | KED  | 0.03           | 3             | 0.1     | Normal     | 159Tb (KED) |
| 152Sm (KED) | KED  | 0.03           | 3             | 0.1     | Normal     | 159Tb (KED) |
| 153Eu (KED) | KED  | 0.03           | 3             | 0.1     | Normal     | 159Tb (KED) |
| 158Gd (KED) | KED  | 0.03           | 3             | 0.1     | Normal     | 159Tb (KED) |
| 159Tb (KED) | KED  | 0.03           | 3             | 0.1     | Normal     |             |
| 164Dy (KED) | KED  | 0.03           | 3             | 0.1     | Normal     | 159Tb (KED) |
| 166Er (KED) | KED  | 0.03           | 3             | 0.1     | Normal     | 159Tb (KED) |
| 169Tm (KED) | KED  | 0.03           | 3             | 0.1     | Normal     | 159Tb (KED) |
| 174Yb (KED) | KED  | 0.03           | 3             | 0.1     | Normal     | 159Tb (KED) |
| 175Lu (KED) | KED  | 0.03           | 3             | 0.1     | Normal     | 159Tb (KED) |
| 205Tl (KED) | KED  | 0.03           | 3             | 0.1     | Normal     | 209Bi (KED) |
| 208Pb (KED) | KED  | 0.03           | 3             | 0.1     | Normal     | 209Bi (KED) |
| 209Bi (KED) | KED  | 0.03           | 3             | 0.1     | Normal     |             |
| 232Th (KED) | KED  | 0.03           | 3             | 0.1     | Normal     | 209Bi (KED) |
| 238U (KED)  | KED  | 0.03           | 3             | 0.1     | Normal     | 209Bi (KED) |

| Isotope     | Mode | Dwell time (s) | # of Channels | Spacing | Resolution |
|-------------|------|----------------|---------------|---------|------------|
| 6Li (KED)   | KED  | 0.03           | 3             | 0.1     | Normal     |
| 45Sc (KED)  | KED  | 0.03           | 3             | 0.1     | Normal     |
| 89Y (KED)   | KED  | 0.03           | 3             | 0.1     | Normal     |
| 115In (KED) | KED  | 0.03           | 3             | 0.1     | Normal     |
| 159Tb (KED) | KED  | 0.03           | 3             | 0.1     | Normal     |
| 209Bi (KED) | KED  | 0.03           | 3             | 0.1     | Normal     |

| No. of sweeps | Time per sweep[s] | Time per main run[s] |
|---------------|-------------------|----------------------|
| 10            | 3.87              | 38.7                 |

## Calibration Curves:

9Be (KED)

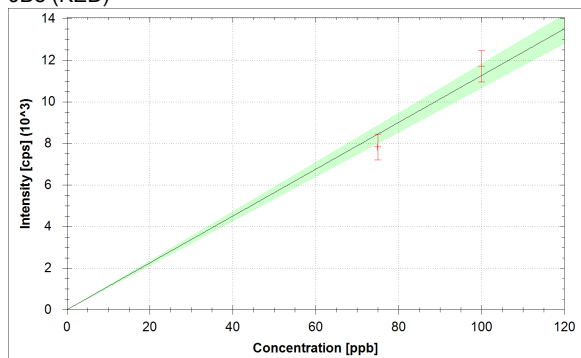

$$f(x) = 112.5842 \cdot x$$

$$R^2 = 0.9943$$

$$\text{BEC} = 0.000 \text{ ppb}$$

$$\text{LoD} = 0.0000 \text{ ppb}$$

11B (KED)

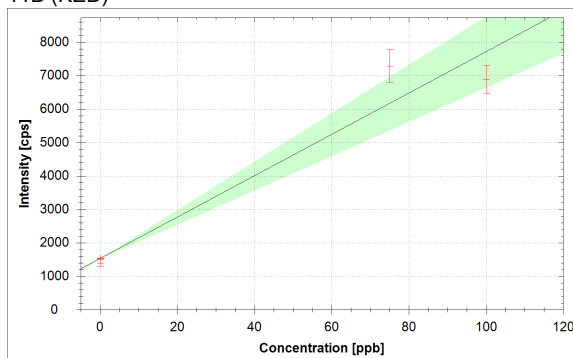

$$f(x) = 61.8213 \cdot x + 1534.7946$$

$$R^2 = 0.9382$$

$$\text{BEC} = 24.826 \text{ ppb}$$

$$\text{LoD} = 5.0582 \text{ ppb}$$

24Mg (KED)

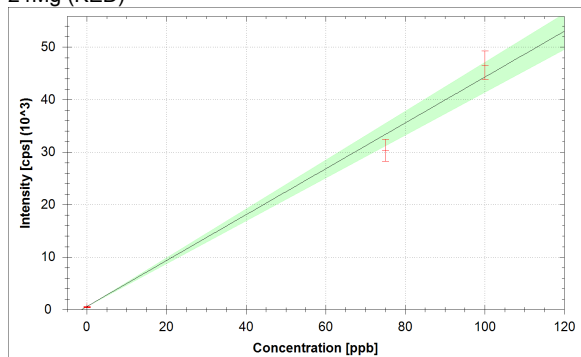

$$f(x) = 436.8941 \cdot x + 589.0672$$

$$R^2 = 0.9909$$

$$\text{BEC} = 1.348 \text{ ppb}$$

$$\text{LoD} = 0.4492 \text{ ppb}$$

27Al (KED)

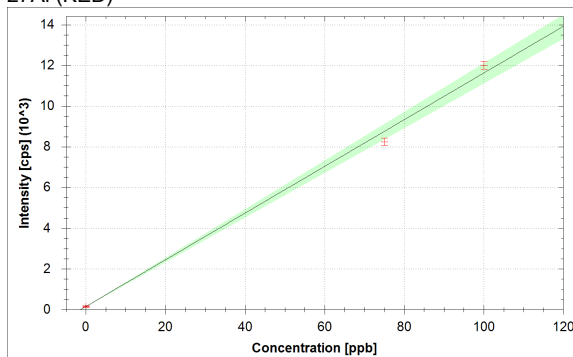

$$f(x) = 114.7128 \cdot x + 150.4462$$

$$R^2 = 0.9962$$

$$\text{BEC} = 1.312 \text{ ppb}$$

$$\text{LoD} = 0.5256 \text{ ppb}$$

51V (KED)

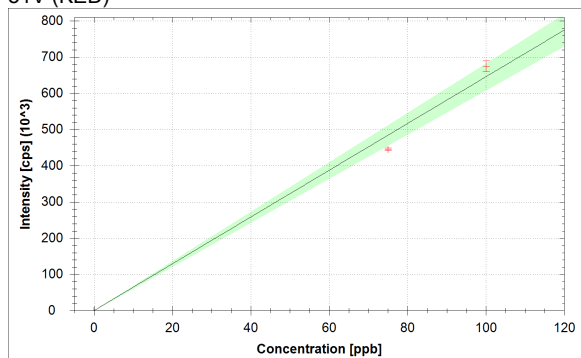

$$f(x) = 6457.3024 \cdot x + 20.8140$$

$$R^2 = 0.9931$$

$$\text{BEC} = 0.003 \text{ ppb}$$

$$\text{LoD} = 0.0009 \text{ ppb}$$

52Cr (KED)

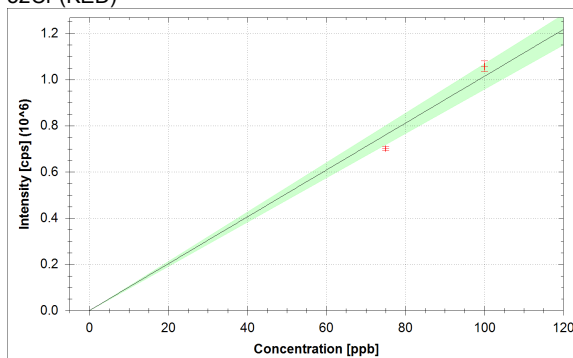

$$f(x) = 10134.4046 \cdot x + 187.4493$$

$$R^2 = 0.9936$$

$$\text{BEC} = 0.018 \text{ ppb}$$

$$\text{LoD} = 0.0118 \text{ ppb}$$

55Mn (KED)

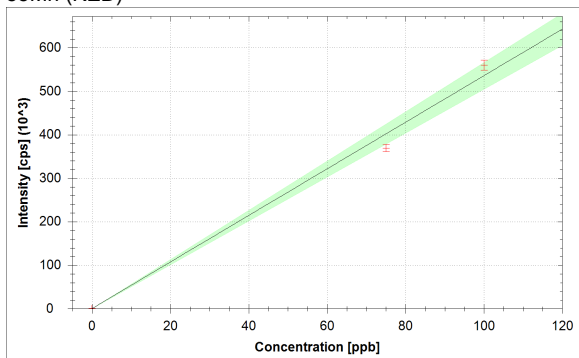

$$f(x) = 5353.2123 \cdot x + 458.5360$$

$$R^2 = 0.9929$$

$$\text{BEC} = 0.086 \text{ ppb}$$

$$\text{LoD} = 0.0375 \text{ ppb}$$

56Fe (KED)

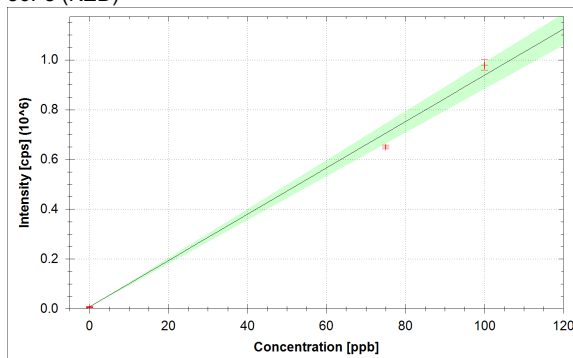

$$f(x) = 9303.8766 \cdot x + 7407.2151$$

$$R^2 = 0.9933$$

$$\text{BEC} = 0.796 \text{ ppb}$$

$$\text{LoD} = 0.7148 \text{ ppb}$$

58Ni (KED)

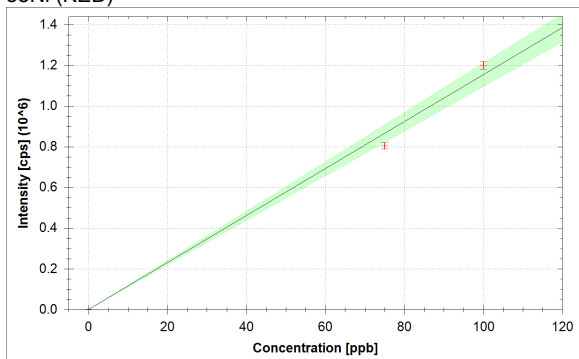

$$f(x) = 11538.9026 \cdot x + 435.6502$$

$$R^2 = 0.9945$$

$$\text{BEC} = 0.038 \text{ ppb}$$

$$\text{LoD} = 0.0196 \text{ ppb}$$

59Co (KED)

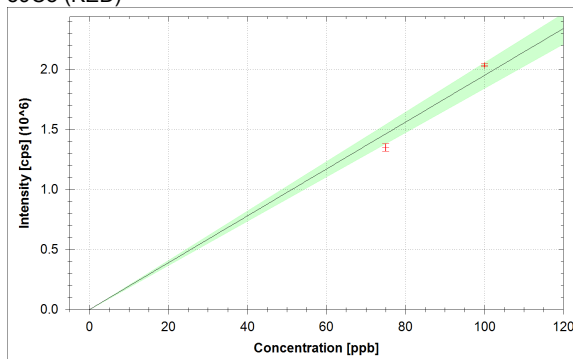

$$f(x) = 19503.4094 \cdot x + 61.5200$$

$$R^2 = 0.9936$$

$$\text{BEC} = 0.003 \text{ ppb}$$

$$\text{LoD} = 0.0028 \text{ ppb}$$

63Cu (KED)

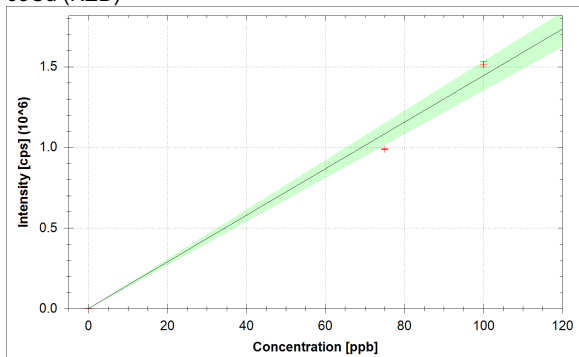

$$f(x) = 14437.8344 \cdot x + 790.9444$$

$$R^2 = 0.9918$$

$$\text{BEC} = 0.055 \text{ ppb}$$

$$\text{LoD} = 0.0317 \text{ ppb}$$

64Zn (KED)

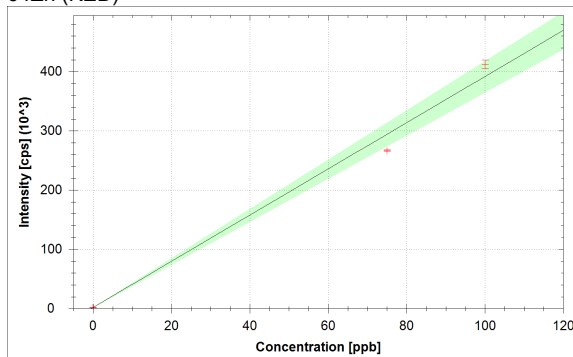

$$f(x) = 3897.6486 \cdot x + 1819.2909$$

$$R^2 = 0.9904$$

$$\text{BEC} = 0.467 \text{ ppb}$$

$$\text{LoD} = 0.2221 \text{ ppb}$$

69Ga (KED)

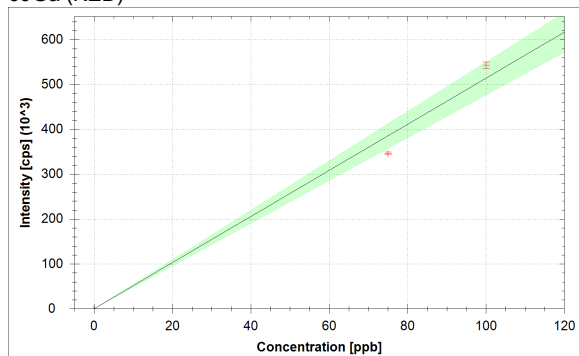

$$f(x) = 5137.6488 \cdot x + 85.4044$$

$$R^2 = 0.9890$$

$$\text{BEC} = 0.017 \text{ ppb}$$

$$\text{LoD} = 0.0066 \text{ ppb}$$

75As (KED)

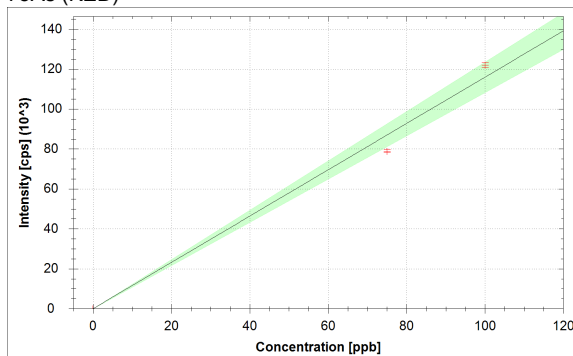

$$f(x) = 1158.9687 \cdot x + 14.6240$$

$$R^2 = 0.9907$$

$$\text{BEC} = 0.013 \text{ ppb}$$

$$\text{LoD} = 0.0134 \text{ ppb}$$

80Se (KED)

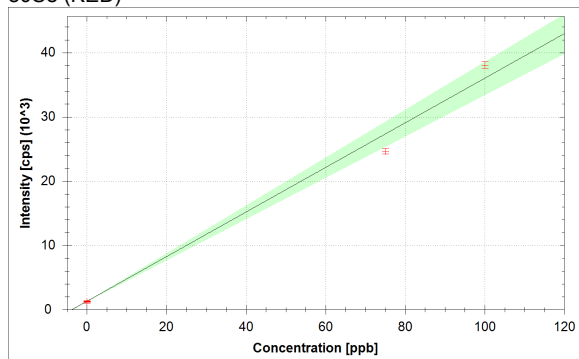

$$f(x) = 347.2437 \cdot x + 1290.9908$$

$$R^2 = 0.9886$$

$$\text{BEC} = 3.718 \text{ ppb}$$

$$\text{LoD} = 1.1677 \text{ ppb}$$

85Rb (KED)

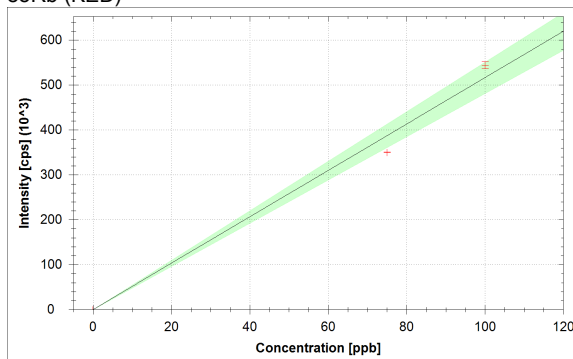

$$f(x) = 5163.0484 \cdot x + 29.1536$$

$$R^2 = 0.9902$$

$$\text{BEC} = 0.006 \text{ ppb}$$

$$\text{LoD} = 0.0039 \text{ ppb}$$

88Sr (KED)

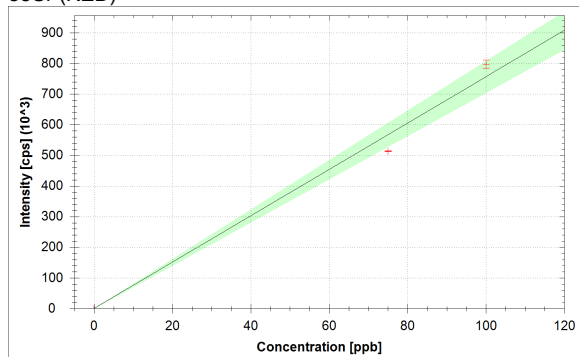

$$f(x) = 7563.0978 \cdot x + 241.5375$$

$$R^2 = 0.9901$$

$$\text{BEC} = 0.032 \text{ ppb}$$

$$\text{LoD} = 0.0136 \text{ ppb}$$

107Ag (KED)

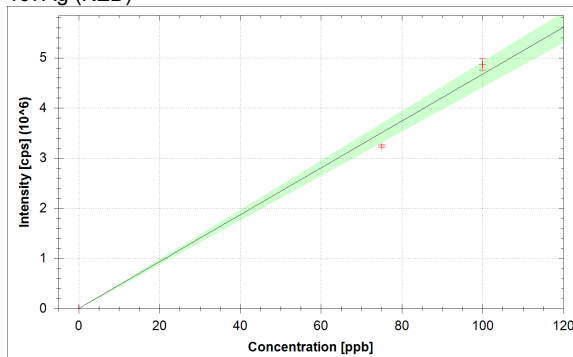

$$f(x) = 46728.7599 \cdot x + 121.2719$$

$$R^2 = 0.9938$$

$$\text{BEC} = 0.003 \text{ ppb}$$

$$\text{LoD} = 0.0020 \text{ ppb}$$

**<sup>114</sup>Cd (KED)**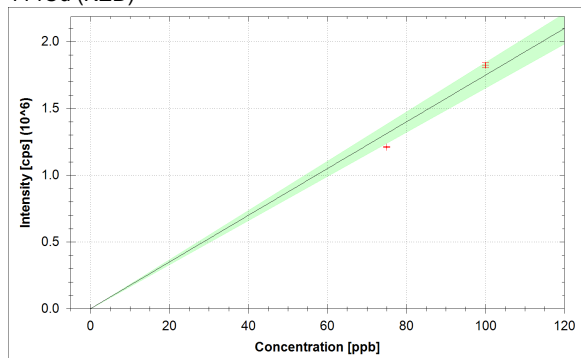

$$f(x) = 17472.9622 \cdot x + 74.5983$$

$$R^2 = 0.9936$$

$$\text{BEC} = 0.004 \text{ ppb}$$

$$\text{LoD} = 0.0021 \text{ ppb}$$

**<sup>133</sup>Cs (KED)**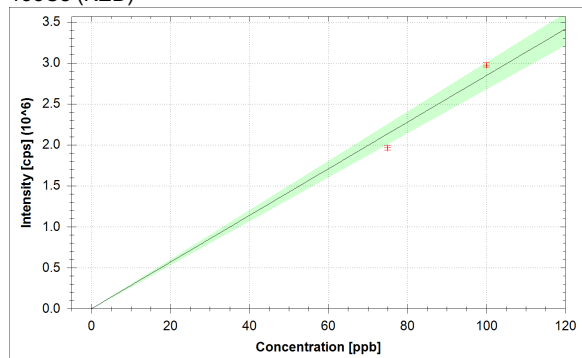

$$f(x) = 28448.3608 \cdot x + 67.9262$$

$$R^2 = 0.9931$$

$$\text{BEC} = 0.002 \text{ ppb}$$

$$\text{LoD} = 0.0011 \text{ ppb}$$

**<sup>138</sup>Ba (KED)**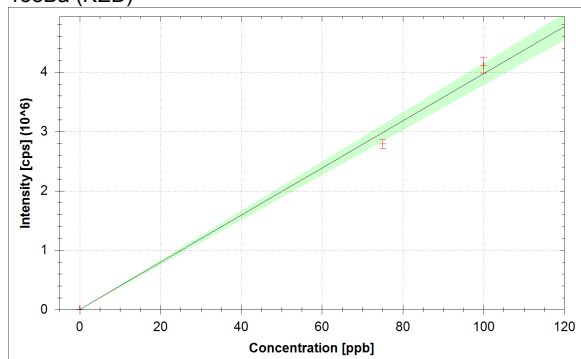

$$f(x) = 39680.8402 \cdot x + 2331.3765$$

$$R^2 = 0.9955$$

$$\text{BEC} = 0.059 \text{ ppb}$$

$$\text{LoD} = 0.0269 \text{ ppb}$$

**<sup>139</sup>La (KED)**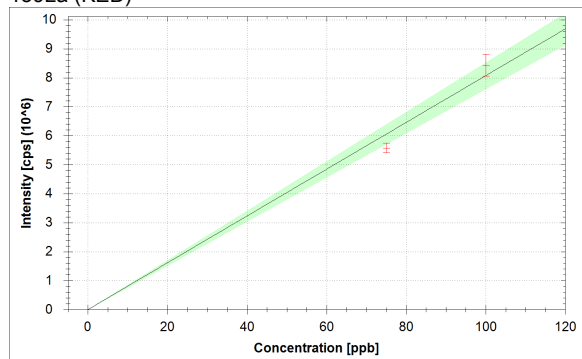

$$f(x) = 80725.0728 \cdot x + 129.2370$$

$$R^2 = 0.9933$$

$$\text{BEC} = 0.002 \text{ ppb}$$

$$\text{LoD} = 0.0006 \text{ ppb}$$

**<sup>140</sup>Ce (KED)**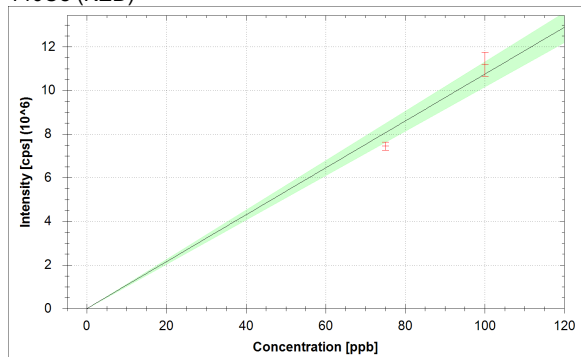

$$f(x) = 107425.2269 \cdot x + 436.9326$$

$$R^2 = 0.9938$$

$$\text{BEC} = 0.004 \text{ ppb}$$

$$\text{LoD} = 0.0023 \text{ ppb}$$

**<sup>141</sup>Pr (KED)**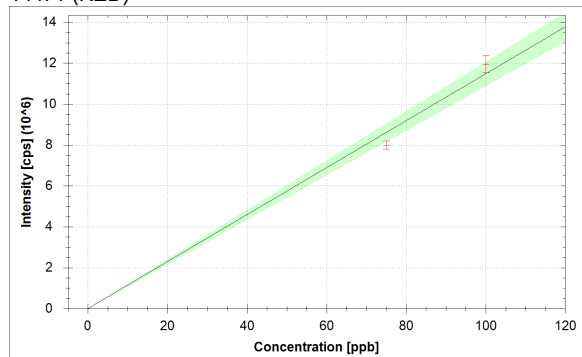

$$f(x) = 114813.4179 \cdot x + 67.6200$$

$$R^2 = 0.9944$$

$$\text{BEC} = 0.001 \text{ ppb}$$

$$\text{LoD} = 0.0003 \text{ ppb}$$

**<sup>142</sup>Nd (KED)**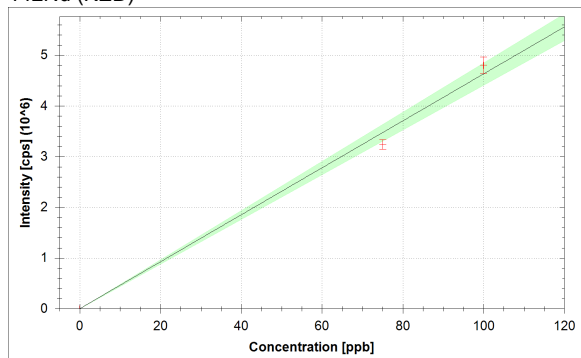

$$f(x) = 46315.6679 \cdot x + 93.2242$$

$$R^2 = 0.9951$$

$$\text{BEC} = 0.002 \text{ ppb}$$

$$\text{LoD} = 0.0004 \text{ ppb}$$

**<sup>152</sup>Sm (KED)**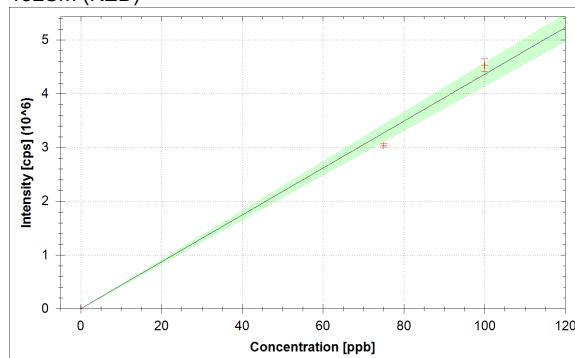

$$f(x) = 43601.1998 \cdot x + 31.4796$$

$$R^2 = 0.9946$$

$$\text{BEC} = 0.001 \text{ ppb}$$

$$\text{LoD} = 0.0002 \text{ ppb}$$

**<sup>153</sup>Eu (KED)**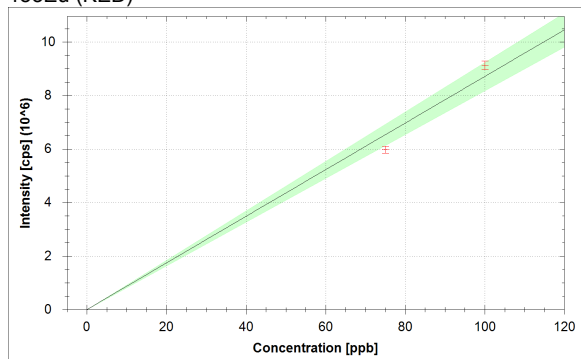

$$f(x) = 87102.4883 \cdot x + 51.7689$$

$$R^2 = 0.9921$$

$$\text{BEC} = 0.001 \text{ ppb}$$

$$\text{LoD} = 0.0003 \text{ ppb}$$

**<sup>158</sup>Gd (KED)**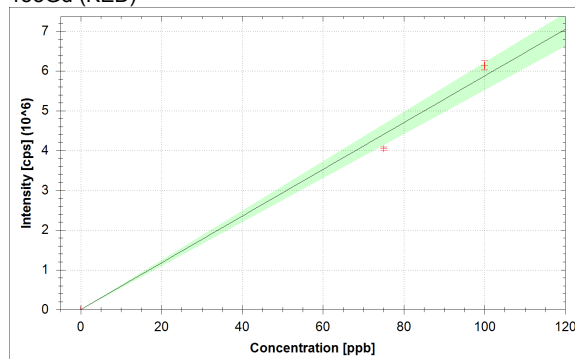

$$f(x) = 58721.1545 \cdot x + 33.7391$$

$$R^2 = 0.9928$$

$$\text{BEC} = 0.001 \text{ ppb}$$

$$\text{LoD} = 0.0006 \text{ ppb}$$

**<sup>164</sup>Dy (KED)**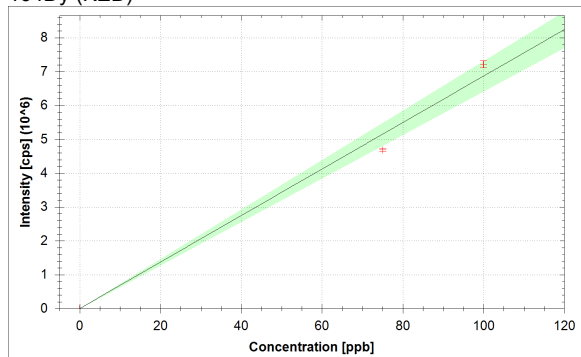

$$f(x) = 68674.9652 \cdot x + 45.0400$$

$$R^2 = 0.9912$$

$$\text{BEC} = 0.001 \text{ ppb}$$

$$\text{LoD} = 0.0007 \text{ ppb}$$

**<sup>166</sup>Er (KED)**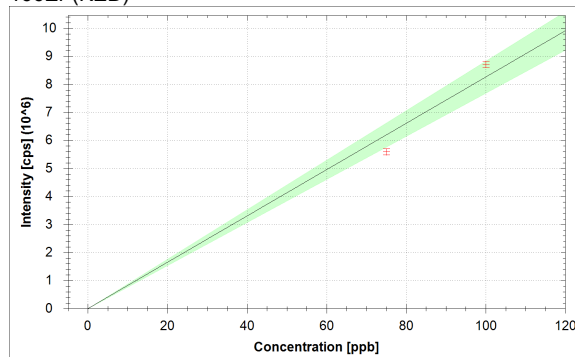

$$f(x) = 82606.9809 \cdot x + 291.1682$$

$$R^2 = 0.9897$$

$$\text{BEC} = 0.004 \text{ ppb}$$

$$\text{LoD} = 0.0013 \text{ ppb}$$

169Tm (KED)

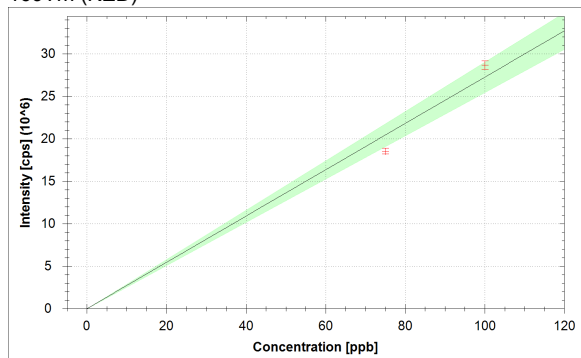

$$f(x) = 272542.4246 \cdot x + 103.3229$$

$$R^2 = 0.9907$$

$$\text{BEC} = 0.000 \text{ ppb}$$

$$\text{LoD} = 0.0002 \text{ ppb}$$

174Yb (KED)

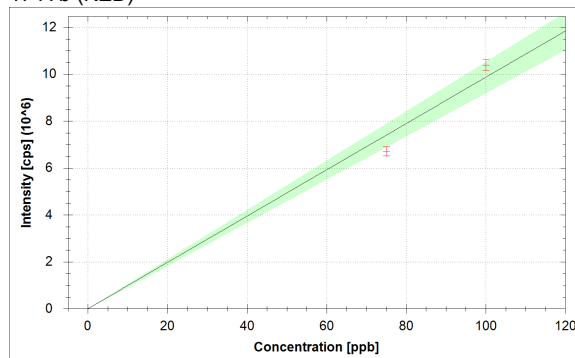

$$f(x) = 98651.7827 \cdot x + 69.7120$$

$$R^2 = 0.9906$$

$$\text{BEC} = 0.001 \text{ ppb}$$

$$\text{LoD} = 0.0001 \text{ ppb}$$

175Lu (KED)

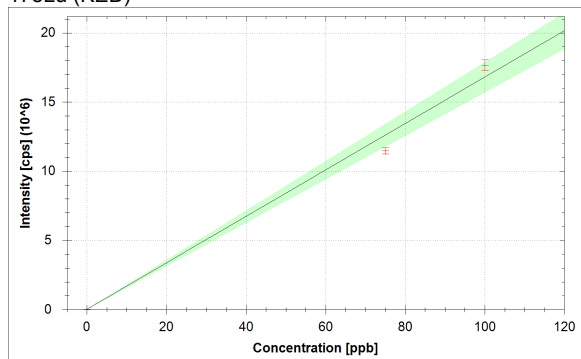

$$f(x) = 167789.6008 \cdot x + 20663.3833$$

$$R^2 = 0.9911$$

$$\text{BEC} = 0.123 \text{ ppb}$$

$$\text{LoD} = 0.0054 \text{ ppb}$$

205Tl (KED)

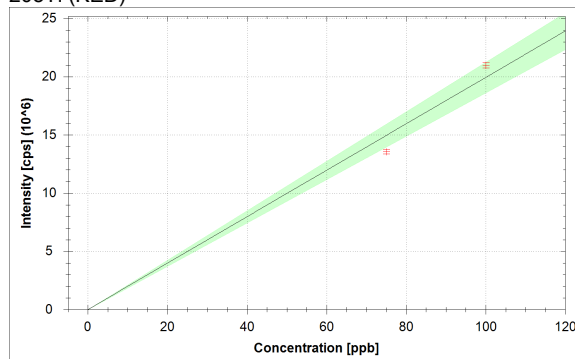

$$f(x) = 199364.8187 \cdot x + 62.6657$$

$$R^2 = 0.9907$$

$$\text{BEC} = 0.000 \text{ ppb}$$

$$\text{LoD} = 0.0003 \text{ ppb}$$

208Pb (KED)

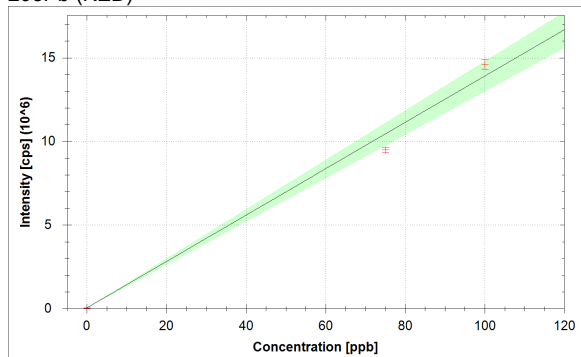

$$f(x) = 138640.2642 \cdot x + 42007.7715$$

$$R^2 = 0.9912$$

$$\text{BEC} = 0.303 \text{ ppb}$$

$$\text{LoD} = 0.0812 \text{ ppb}$$

232Th (KED)

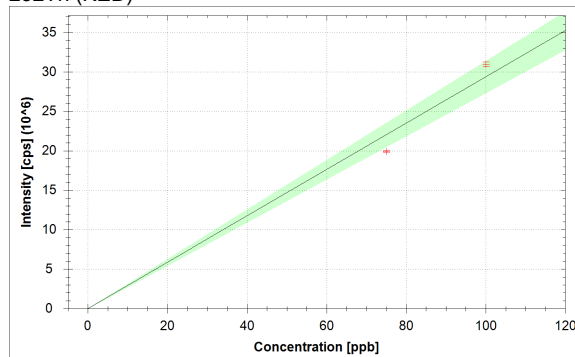

$$f(x) = 293639.7934 \cdot x + 2893.4840$$

$$R^2 = 0.9899$$

$$\text{BEC} = 0.010 \text{ ppb}$$

$$\text{LoD} = 0.0026 \text{ ppb}$$

238U (KED)

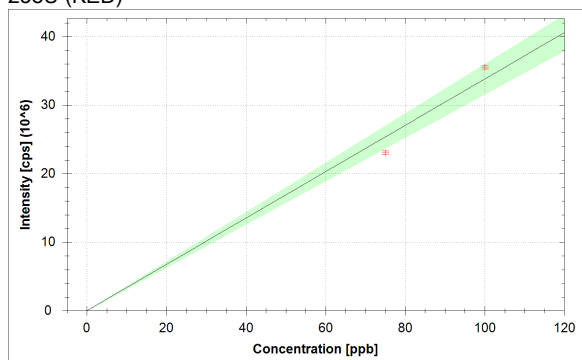

$$f(x) = 337970.7500 \cdot x + 1372.0453$$

$$R^2 = 0.9910$$

$$\text{BEC} = 0.004 \text{ ppb}$$

$$\text{LoD} = 0.0013 \text{ ppb}$$

**Standards:**

Analysis Index: 3  
 Analysis Name: 0+20  
 Analysis Type: STD  
 Analysis Started at: 9/30/2021 11:33:44 AM  
 Standard (Stock): std0  
 Standard DF: 1

| Category    | Concentration average | Concentration RSD | Standard Concentration |
|-------------|-----------------------|-------------------|------------------------|
| 6Li (KED)   | 99.545 %              |                   |                        |
| 9Be (KED)   | 0.000 ppb             |                   | 0.000 ppb              |
| 11B (KED)   | 0.000 ppb             | 0.0 %             | 0.000 ppb              |
| 24Mg (KED)  | 0.000 ppb             | 0.0 %             | 0.000 ppb              |
| 27Al (KED)  | 0.000 ppb             | 0.2 %             | 0.000 ppb              |
| 45Sc (KED)  | 101.200 %             |                   |                        |
| 51V (KED)   | 0.000 ppb             | 0.3 %             | 0.000 ppb              |
| 52Cr (KED)  | 0.000 ppb             | 0.1 %             | 0.000 ppb              |
| 55Mn (KED)  | 0.000 ppb             | 0.2 %             | 0.000 ppb              |
| 56Fe (KED)  | 0.000 ppb             | 0.1 %             | 0.000 ppb              |
| 58Ni (KED)  | 0.000 ppb             | 0.1 %             | 0.000 ppb              |
| 59Co (KED)  | 0.000 ppb             | 0.2 %             | 0.000 ppb              |
| 63Cu (KED)  | 0.000 ppb             | 0.1 %             | 0.000 ppb              |
| 64Zn (KED)  | 0.000 ppb             | 0.0 %             | 0.000 ppb              |
| 69Ga (KED)  | 0.000 ppb             | 0.1 %             | 0.000 ppb              |
| 75As (KED)  | 0.000 ppb             | 0.1 %             | 0.000 ppb              |
| 80Se (KED)  | 0.000 ppb             | 0.1 %             | 0.000 ppb              |
| 85Rb (KED)  | 0.000 ppb             | 0.6 %             | 0.000 ppb              |
| 88Sr (KED)  | 0.000 ppb             | 0.1 %             | 0.000 ppb              |
| 89Y (KED)   | 98.866 %              |                   |                        |
| 107Ag (KED) | 0.000 ppb             | 0.1 %             | 0.000 ppb              |
| 114Cd (KED) | 0.000 ppb             | 0.1 %             | 0.000 ppb              |
| 115In (KED) | 99.833 %              |                   |                        |
| 133Cs (KED) | 0.000 ppb             | 0.2 %             | 0.000 ppb              |
| 138Ba (KED) | 0.000 ppb             | 0.1 %             | 0.000 ppb              |
| 139La (KED) | 0.000 ppb             | 0.1 %             | 0.000 ppb              |
| 140Ce (KED) | 0.000 ppb             | 0.2 %             | 0.000 ppb              |
| 141Pr (KED) | 0.000 ppb             | 0.4 %             | 0.000 ppb              |
| 142Nd (KED) | 0.000 ppb             | 0.2 %             | 0.000 ppb              |
| 152Sm (KED) | 0.000 ppb             | 0.1 %             | 0.000 ppb              |
| 153Eu (KED) | 0.000 ppb             | 0.3 %             | 0.000 ppb              |
| 158Gd (KED) | 0.000 ppb             | 0.1 %             | 0.000 ppb              |
| 159Tb (KED) | 98.828 %              |                   |                        |
| 164Dy (KED) | 0.000 ppb             | 0.3 %             | 0.000 ppb              |
| 166Er (KED) | 0.000 ppb             | 0.1 %             | 0.000 ppb              |
| 169Tm (KED) | 0.000 ppb             | 0.2 %             | 0.000 ppb              |
| 174Yb (KED) | 0.000 ppb             | 0.1 %             | 0.000 ppb              |
| 175Lu (KED) | 0.000 ppb             | 0.0 %             | 0.000 ppb              |
| 205Tl (KED) | 0.000 ppb             | 0.1 %             | 0.000 ppb              |
| 208Pb (KED) | 0.000 ppb             | 0.0 %             | 0.000 ppb              |
| 209Bi (KED) | 99.327 %              |                   |                        |
| 232Th (KED) | 0.000 ppb             | 0.0 %             | 0.000 ppb              |
| 238U (KED)  | 0.000 ppb             | 0.1 %             | 0.000 ppb              |

## Standards:

Analysis Index: 4  
 Analysis Name: 50+20  
 Analysis Type: STD  
 Analysis Started at: 9/30/2021 11:36:49 AM  
 Standard (Stock): std1  
 Standard DF: 1

| Category    | Concentration average | Concentration RSD | Standard Concentration |
|-------------|-----------------------|-------------------|------------------------|
| 6Li (KED)   | 104.869 %             |                   |                        |
| 9Be (KED)   | 69.554 ppb            | 8.0 %             | 75.000 ppb             |
| 11B (KED)   | 93.012 ppb            | 8.7 %             | 75.000 ppb             |
| 24Mg (KED)  | 68.084 ppb            | 7.0 %             | 75.000 ppb             |
| 27Al (KED)  | 70.533 ppb            | 2.3 %             | 75.000 ppb             |
| 45Sc (KED)  | 104.799 %             |                   |                        |
| 51V (KED)   | 68.999 ppb            | 0.8 %             | 75.000 ppb             |
| 52Cr (KED)  | 69.238 ppb            | 1.3 %             | 75.000 ppb             |
| 55Mn (KED)  | 68.927 ppb            | 2.3 %             | 75.000 ppb             |
| 56Fe (KED)  | 69.065 ppb            | 1.2 %             | 75.000 ppb             |
| 58Ni (KED)  | 69.661 ppb            | 1.9 %             | 75.000 ppb             |
| 59Co (KED)  | 69.203 ppb            | 2.4 %             | 75.000 ppb             |
| 63Cu (KED)  | 68.438 ppb            | 0.3 %             | 75.000 ppb             |
| 64Zn (KED)  | 67.883 ppb            | 0.6 %             | 75.000 ppb             |
| 69Ga (KED)  | 67.385 ppb            | 0.8 %             | 75.000 ppb             |
| 75As (KED)  | 68.018 ppb            | 1.1 %             | 75.000 ppb             |
| 80Se (KED)  | 67.227 ppb            | 1.9 %             | 75.000 ppb             |
| 85Rb (KED)  | 67.839 ppb            | 0.1 %             | 75.000 ppb             |
| 88Sr (KED)  | 67.806 ppb            | 0.4 %             | 75.000 ppb             |
| 89Y (KED)   | 104.370 %             |                   |                        |
| 107Ag (KED) | 69.336 ppb            | 0.8 %             | 75.000 ppb             |
| 114Cd (KED) | 69.205 ppb            | 0.5 %             | 75.000 ppb             |
| 115In (KED) | 103.935 %             |                   |                        |
| 133Cs (KED) | 68.982 ppb            | 1.3 %             | 75.000 ppb             |
| 138Ba (KED) | 70.158 ppb            | 2.6 %             | 75.000 ppb             |
| 139La (KED) | 69.067 ppb            | 3.0 %             | 75.000 ppb             |
| 140Ce (KED) | 69.330 ppb            | 2.5 %             | 75.000 ppb             |
| 141Pr (KED) | 69.598 ppb            | 2.5 %             | 75.000 ppb             |
| 142Nd (KED) | 69.966 ppb            | 2.9 %             | 75.000 ppb             |
| 152Sm (KED) | 69.723 ppb            | 1.1 %             | 75.000 ppb             |
| 153Eu (KED) | 68.562 ppb            | 2.2 %             | 75.000 ppb             |
| 158Gd (KED) | 68.853 ppb            | 1.1 %             | 75.000 ppb             |
| 159Tb (KED) | 103.741 %             |                   |                        |
| 164Dy (KED) | 68.197 ppb            | 1.2 %             | 75.000 ppb             |
| 166Er (KED) | 67.655 ppb            | 2.0 %             | 75.000 ppb             |
| 169Tm (KED) | 68.022 ppb            | 1.9 %             | 75.000 ppb             |
| 174Yb (KED) | 67.963 ppb            | 3.0 %             | 75.000 ppb             |
| 175Lu (KED) | 68.186 ppb            | 2.0 %             | 75.000 ppb             |
| 205Tl (KED) | 68.010 ppb            | 1.4 %             | 75.000 ppb             |
| 208Pb (KED) | 68.193 ppb            | 1.6 %             | 75.000 ppb             |
| 209Bi (KED) | 103.629 %             |                   |                        |
| 232Th (KED) | 67.728 ppb            | 0.6 %             | 75.000 ppb             |
| 238U (KED)  | 68.122 ppb            | 1.2 %             | 75.000 ppb             |

# Comprehensive

9/30/2021 2:22:41 PM

## Standards:

Analysis Index: 5  
Analysis Name: 100+20  
Analysis Type: STD  
Analysis Started at: 9/30/2021 11:40:10 AM  
Standard (Stock): std2  
Standard DF: 1

| Category    | Concentration average | Concentration RSD | Standard Concentration |
|-------------|-----------------------|-------------------|------------------------|
| 6Li (KED)   | 100.637 %             |                   |                        |
| 9Be (KED)   | 104.085 ppb           | 6.5 %             | 100.000 ppb            |
| 11B (KED)   | 86.491 ppb            | 7.7 %             | 100.000 ppb            |
| 24Mg (KED)  | 105.187 ppb           | 5.9 %             | 100.000 ppb            |
| 27Al (KED)  | 103.350 ppb           | 1.6 %             | 100.000 ppb            |
| 45Sc (KED)  | 101.878 %             |                   |                        |
| 51V (KED)   | 104.501 ppb           | 2.2 %             | 100.000 ppb            |
| 52Cr (KED)  | 104.322 ppb           | 2.2 %             | 100.000 ppb            |
| 55Mn (KED)  | 104.555 ppb           | 2.1 %             | 100.000 ppb            |
| 56Fe (KED)  | 104.451 ppb           | 2.1 %             | 100.000 ppb            |
| 58Ni (KED)  | 104.004 ppb           | 1.5 %             | 100.000 ppb            |
| 59Co (KED)  | 104.348 ppb           | 0.7 %             | 100.000 ppb            |
| 63Cu (KED)  | 104.921 ppb           | 1.1 %             | 100.000 ppb            |
| 64Zn (KED)  | 105.338 ppb           | 1.7 %             | 100.000 ppb            |
| 69Ga (KED)  | 105.711 ppb           | 1.3 %             | 100.000 ppb            |
| 75As (KED)  | 105.237 ppb           | 1.0 %             | 100.000 ppb            |
| 80Se (KED)  | 105.830 ppb           | 1.4 %             | 100.000 ppb            |
| 85Rb (KED)  | 105.371 ppb           | 1.4 %             | 100.000 ppb            |
| 88Sr (KED)  | 105.395 ppb           | 1.6 %             | 100.000 ppb            |
| 89Y (KED)   | 100.091 %             |                   |                        |
| 107Ag (KED) | 104.248 ppb           | 2.4 %             | 100.000 ppb            |
| 114Cd (KED) | 104.347 ppb           | 1.1 %             | 100.000 ppb            |
| 115In (KED) | 101.283 %             |                   |                        |
| 133Cs (KED) | 104.513 ppb           | 0.9 %             | 100.000 ppb            |
| 138Ba (KED) | 103.631 ppb           | 3.1 %             | 100.000 ppb            |
| 139La (KED) | 104.450 ppb           | 4.5 %             | 100.000 ppb            |
| 140Ce (KED) | 104.252 ppb           | 4.9 %             | 100.000 ppb            |
| 141Pr (KED) | 104.051 ppb           | 3.6 %             | 100.000 ppb            |
| 142Nd (KED) | 103.776 ppb           | 3.4 %             | 100.000 ppb            |
| 152Sm (KED) | 103.958 ppb           | 2.6 %             | 100.000 ppb            |
| 153Eu (KED) | 104.828 ppb           | 1.7 %             | 100.000 ppb            |
| 158Gd (KED) | 104.610 ppb           | 1.9 %             | 100.000 ppb            |
| 159Tb (KED) | 103.043 %             |                   |                        |
| 164Dy (KED) | 105.102 ppb           | 1.3 %             | 100.000 ppb            |
| 166Er (KED) | 105.509 ppb           | 1.2 %             | 100.000 ppb            |
| 169Tm (KED) | 105.234 ppb           | 1.7 %             | 100.000 ppb            |
| 174Yb (KED) | 105.278 ppb           | 2.3 %             | 100.000 ppb            |
| 175Lu (KED) | 105.110 ppb           | 2.1 %             | 100.000 ppb            |
| 205Tl (KED) | 105.242 ppb           | 1.1 %             | 100.000 ppb            |
| 208Pb (KED) | 105.106 ppb           | 2.1 %             | 100.000 ppb            |
| 209Bi (KED) | 102.058 %             |                   |                        |
| 232Th (KED) | 105.454 ppb           | 1.0 %             | 100.000 ppb            |
| 238U (KED)  | 105.159 ppb           | 0.8 %             | 100.000 ppb            |

## Sample List Summary:

Instrument ID: iCAP Q

| Index: | Label:              | Main<br>Runs: | Survey<br>Runs: | Start Time:           | User name:                    |
|--------|---------------------|---------------|-----------------|-----------------------|-------------------------------|
| 1      | water               | 3             | 0               | 9/30/2021 11:27:34 AM | WINDOWS-UPCI4ER\Administrator |
| 2      | blk                 | 3             | 0               | 9/30/2021 11:30:30 AM | WINDOWS-UPCI4ER\Administrator |
| 3      | 0+20                | 3             | 0               | 9/30/2021 11:33:44 AM | WINDOWS-UPCI4ER\Administrator |
| 4      | 50+20               | 3             | 0               | 9/30/2021 11:36:49 AM | WINDOWS-UPCI4ER\Administrator |
| 5      | 100+20              | 3             | 0               | 9/30/2021 11:40:10 AM | WINDOWS-UPCI4ER\Administrator |
| 6      | 024750(17847)jian   | 3             | 0               | 9/30/2021 11:43:39 AM | WINDOWS-UPCI4ER\Administrator |
| 7      | 028425(027)jian     | 3             | 0               | 9/30/2021 11:47:16 AM | WINDOWS-UPCI4ER\Administrator |
| 8      | 046127(179227)      | 3             | 0               | 9/30/2021 11:50:36 AM | WINDOWS-UPCI4ER\Administrator |
| 9      | 179184jian          | 3             | 0               | 9/30/2021 11:54:03 AM | WINDOWS-UPCI4ER\Administrator |
| 10     | 033915(179178)jian  | 3             | 0               | 9/30/2021 11:57:44 AM | WINDOWS-UPCI4ER\Administrator |
| 11     | 046214(179142)jian  | 3             | 0               | 9/30/2021 12:01:28 PM | WINDOWS-UPCI4ER\Administrator |
| 12     | 179224jian          | 3             | 0               | 9/30/2021 12:09:14 PM | WINDOWS-UPCI4ER\Administrator |
| 13     | 047600(178548)jian  | 3             | 0               | 9/30/2021 12:14:46 PM | WINDOWS-UPCI4ER\Administrator |
| 14     | 179410jian          | 3             | 0               | 9/30/2021 12:19:07 PM | WINDOWS-UPCI4ER\Administrator |
| 15     | 047668(178626)jian  | 3             | 0               | 9/30/2021 12:23:24 PM | WINDOWS-UPCI4ER\Administrator |
| 16     | 026367(179413)jian  | 3             | 0               | 9/30/2021 12:27:47 PM | WINDOWS-UPCI4ER\Administrator |
| 17     | 028529(178579)jian  | 3             | 0               | 9/30/2021 12:32:59 PM | WINDOWS-UPCI4ER\Administrator |
| 18     | 047678(178591)jian  | 3             | 0               | 9/30/2021 12:37:34 PM | WINDOWS-UPCI4ER\Administrator |
| 19     | 029245(179423)jian  | 3             | 0               | 9/30/2021 12:41:41 PM | WINDOWS-UPCI4ER\Administrator |
| 20     | 178562jian          | 3             | 0               | 9/30/2021 12:46:34 PM | WINDOWS-UPCI4ER\Administrator |
| 21     | 048723(178655)jian  | 3             | 0               | 9/30/2021 12:50:46 PM | WINDOWS-UPCI4ER\Administrator |
| 22     | 178640jian          | 3             | 0               | 9/30/2021 1:29:11 PM  | WINDOWS-UPCI4ER\Administrator |
| 23     | 026370(1786187)jian | 3             | 0               | 9/30/2021 1:33:40 PM  | WINDOWS-UPCI4ER\Administrator |
| 24     | 028762(178646)jian  | 3             | 0               | 9/30/2021 1:38:20 PM  | WINDOWS-UPCI4ER\Administrator |
| 25     | 048732(179400)jian  | 3             | 0               | 9/30/2021 1:42:35 PM  | WINDOWS-UPCI4ER\Administrator |
| 26     | 047672(179380)jian  | 1             | 0               | 9/30/2021 1:46:34 PM  | WINDOWS-UPCI4ER\Administrator |
| 27     | 028423(178578)jian  | 1             | 0               | 9/30/2021 1:49:16 PM  | WINDOWS-UPCI4ER\Administrator |
| 28     | 178600jian          | 1             | 0               | 9/30/2021 1:51:58 PM  | WINDOWS-UPCI4ER\Administrator |
| 29     | 14ti                | 1             | 0               | 9/30/2021 1:54:54 PM  | WINDOWS-UPCI4ER\Administrator |

# Comprehensive

9/30/2021 2:22:41 PM

## Sample Summary

Instrument ID: iCAP Q

Analysis index: 1

Analysis name: water

Analysis started at: 9/30/2021 11:27:34 AM

User name: WINDOWS-UPCI4ER\Administrator

| Category    | Concentration average | Concentration RSD |
|-------------|-----------------------|-------------------|
| 6Li (KED)   | 0.091 %               | 86.6 %            |
| 11B (KED)   | Infinity ppb          |                   |
| 24Mg (KED)  | Infinity ppb          |                   |
| 27Al (KED)  | 178.755 ppb           | 131.0 %           |
| 45Sc (KED)  | 0.046 %               | 39.0 %            |
| 51V (KED)   | 0.985 ppb             | 100.3 %           |
| 52Cr (KED)  | 3.878 ppb             | 82.5 %            |
| 55Mn (KED)  | 4.965 ppb             | 79.7 %            |
| 56Fe (KED)  | 165.757 ppb           | 87.4 %            |
| 58Ni (KED)  | 35.580 ppb            | 37.2 %            |
| 59Co (KED)  | -0.003 ppb            | 0.0 %             |
| 63Cu (KED)  | 38.309 ppb            | 56.6 %            |
| 64Zn (KED)  | 776.457 ppb           | 28.1 %            |
| 69Ga (KED)  | 3.593 ppb             | 174.0 %           |
| 75As (KED)  | 46.903 ppb            | 111.6 %           |
| 80Se (KED)  | 44,199.435 ppb        | 27.3 %            |
| 85Rb (KED)  | 3.587 ppb             | 173.5 %           |
| 88Sr (KED)  | 6.235 ppb             | 93.0 %            |
| 89Y (KED)   | 0.008 %               | 31.6 %            |
| 107Ag (KED) | 3.217 ppb             | 48.1 %            |
| 114Cd (KED) | 2.630 ppb             | 173.5 %           |
| 115In (KED) | 0.005 %               | 9.9 %             |
| 133Cs (KED) | 1.491 ppb             | 87.6 %            |
| 138Ba (KED) | 12.242 ppb            | 23.5 %            |
| 139La (KED) | -0.002 ppb            | 0.0 %             |
| 140Ce (KED) | 0.585 ppb             | 25.7 %            |
| 141Pr (KED) | -0.001 ppb            | 0.0 %             |
| 142Nd (KED) | 1.157 ppb             | 99.3 %            |
| 152Sm (KED) | 0.312 ppb             | 173.6 %           |
| 153Eu (KED) | -0.001 ppb            | 0.0 %             |
| 158Gd (KED) | -0.001 ppb            | 0.0 %             |
| 159Tb (KED) | 0.007 %               | 16.6 %            |
| 164Dy (KED) | -0.001 ppb            | 0.0 %             |
| 166Er (KED) | 0.162 ppb             | 177.0 %           |
| 169Tm (KED) | 0.000 ppb             | 0.0 %             |
| 174Yb (KED) | -0.001 ppb            | 0.0 %             |
| 175Lu (KED) | -0.123 ppb            | 0.0 %             |
| 205Tl (KED) | 0.554 ppb             | 100.4 %           |
| 208Pb (KED) | 5.808 ppb             | 74.1 %            |
| 209Bi (KED) | 0.031 %               | 119.6 %           |
| 232Th (KED) | 0.053 ppb             | 119.0 %           |
| 238U (KED)  | 0.032 ppb             | 195.2 %           |

| Category   | Concentration average | Intensity average | Intensity RSD |
|------------|-----------------------|-------------------|---------------|
| 6Li (KED)  | 0.091 %               | 2 cps             | 86.6 %        |
| 9Be (KED)  |                       | 0 cps             |               |
| 11B (KED)  | Infinity ppb          | 11 cps            | 96.4 %        |
| 24Mg (KED) | Infinity ppb          | 34 cps            | 98.8 %        |
| 27Al (KED) | 178.755 ppb           | 7 cps             | 100.0 %       |
| 45Sc (KED) | 0.046 %               | 18 cps            | 39.0 %        |

| Category    | Concentration average | Intensity average | Intensity RSD |
|-------------|-----------------------|-------------------|---------------|
| 51V (KED)   | 0.985 ppb             | 2 cps             | 86.6 %        |
| 52Cr (KED)  | 3.878 ppb             | 14 cps            | 35.3 %        |
| 55Mn (KED)  | 4.965 ppb             | 10 cps            | 33.3 %        |
| 56Fe (KED)  | 165.757 ppb           | 559 cps           | 39.3 %        |
| 58Ni (KED)  | 35.580 ppb            | 173 cps           | 15.3 %        |
| 59Co (KED)  | -0.003 ppb            | 0 cps             |               |
| 63Cu (KED)  | 38.309 ppb            | 42 cps            | 50.8 %        |
| 64Zn (KED)  | 776.457 ppb           | 238 cps           | 17.8 %        |
| 69Ga (KED)  | 3.593 ppb             | 1 cps             | 173.2 %       |
| 75As (KED)  | 46.903 ppb            | 6 cps             | 124.9 %       |
| 80Se (KED)  | 44,199.435 ppb        | 1,197 cps         | 5.0 %         |
| 85Rb (KED)  | 3.587 ppb             | 1 cps             | 173.2 %       |
| 88Sr (KED)  | 6.235 ppb             | 3 cps             | 100.0 %       |
| 89Y (KED)   | 0.008 %               | 32 cps            | 31.6 %        |
| 107Ag (KED) | 3.217 ppb             | 8 cps             | 49.5 %        |
| 114Cd (KED) | 2.630 ppb             | 2 cps             | 173.2 %       |
| 115In (KED) | 0.005 %               | 39 cps            | 9.9 %         |
| 133Cs (KED) | 1.491 ppb             | 2 cps             | 86.6 %        |
| 138Ba (KED) | 12.242 ppb            | 33 cps            | 26.5 %        |
| 139La (KED) | -0.002 ppb            | 0 cps             |               |
| 140Ce (KED) | 0.585 ppb             | 4 cps             | 43.3 %        |
| 141Pr (KED) | -0.001 ppb            | 0 cps             |               |
| 142Nd (KED) | 1.157 ppb             | 3 cps             | 100.0 %       |
| 152Sm (KED) | 0.312 ppb             | 1 cps             | 173.2 %       |
| 153Eu (KED) | -0.001 ppb            | 0 cps             |               |
| 158Gd (KED) | -0.001 ppb            | 0 cps             |               |
| 159Tb (KED) | 0.007 %               | 291 cps           | 16.6 %        |
| 164Dy (KED) | -0.001 ppb            | 0 cps             |               |
| 166Er (KED) | 0.162 ppb             | 1 cps             | 173.2 %       |
| 169Tm (KED) | 0.000 ppb             | 0 cps             |               |
| 174Yb (KED) | -0.001 ppb            | 0 cps             |               |
| 175Lu (KED) | -0.123 ppb            | 0 cps             |               |
| 205Tl (KED) | 0.554 ppb             | 16 cps            | 53.9 %        |
| 208Pb (KED) | 5.808 ppb             | 118 cps           | 11.4 %        |
| 209Bi (KED) | 0.031 %               | 1,195 cps         | 119.6 %       |
| 232Th (KED) | 0.053 ppb             | 6 cps             | 124.9 %       |
| 238U (KED)  | 0.032 ppb             | 9 cps             | 173.2 %       |

# Comprehensive

9/30/2021 2:22:41 PM

## Sample Summary

Instrument ID: iCAP Q

Analysis index: 2

Analysis name: blk

Analysis started at: 9/30/2021 11:30:30 AM

User name: WINDOWS-UPCI4ER\Administrator

| Category    | Concentration average | Concentration RSD |
|-------------|-----------------------|-------------------|
| 6Li (KED)   | 100.000 %             |                   |
| 9Be (KED)   | 0.000 ppb             |                   |
| 11B (KED)   | -2.187 ppb            | 77.1 %            |
| 24Mg (KED)  | -0.393 ppb            | 38.1 %            |
| 27Al (KED)  | -0.266 ppb            | 66.0 %            |
| 45Sc (KED)  | 100.000 %             |                   |
| 51V (KED)   | -0.002 ppb            | 20.0 %            |
| 52Cr (KED)  | 0.000 ppb             | 4,552.2 %         |
| 55Mn (KED)  | -0.027 ppb            | 45.7 %            |
| 56Fe (KED)  | -0.123 ppb            | 194.4 %           |
| 58Ni (KED)  | 0.002 ppb             | 360.0 %           |
| 59Co (KED)  | 0.001 ppb             | 75.5 %            |
| 63Cu (KED)  | -0.003 ppb            | 351.8 %           |
| 64Zn (KED)  | -0.058 ppb            | 128.1 %           |
| 69Ga (KED)  | -0.007 ppb            | 31.9 %            |
| 75As (KED)  | -0.002 ppb            | 216.3 %           |
| 80Se (KED)  | -0.555 ppb            | 70.1 %            |
| 85Rb (KED)  | -0.002 ppb            | 82.2 %            |
| 88Sr (KED)  | -0.003 ppb            | 175.0 %           |
| 89Y (KED)   | 100.000 %             |                   |
| 107Ag (KED) | -0.001 ppb            | 94.3 %            |
| 114Cd (KED) | 0.000 ppb             | 337.9 %           |
| 115In (KED) | 100.000 %             |                   |
| 133Cs (KED) | 0.001 ppb             | 60.5 %            |
| 138Ba (KED) | -0.017 ppb            | 54.0 %            |
| 139La (KED) | 0.000 ppb             | 74.6 %            |
| 140Ce (KED) | -0.001 ppb            | 74.7 %            |
| 141Pr (KED) | 0.000 ppb             | 57.1 %            |
| 142Nd (KED) | -0.001 ppb            | 24.0 %            |
| 152Sm (KED) | 0.000 ppb             | 50.2 %            |
| 153Eu (KED) | 0.000 ppb             | 46.0 %            |
| 158Gd (KED) | 0.000 ppb             | 141.2 %           |
| 159Tb (KED) | 100.000 %             |                   |
| 164Dy (KED) | 0.000 ppb             | 1,920.0 %         |
| 166Er (KED) | 0.001 ppb             | 79.7 %            |
| 169Tm (KED) | 0.000 ppb             | 32.2 %            |
| 174Yb (KED) | 0.000 ppb             | 12.7 %            |
| 175Lu (KED) | 0.004 ppb             | 43.9 %            |
| 205Tl (KED) | 0.000 ppb             | 170.0 %           |
| 208Pb (KED) | -0.079 ppb            | 34.1 %            |
| 209Bi (KED) | 100.000 %             |                   |
| 232Th (KED) | -0.002 ppb            | 37.5 %            |
| 238U (KED)  | -0.001 ppb            | 32.8 %            |

| Category   | Concentration average | Intensity average | Intensity RSD |
|------------|-----------------------|-------------------|---------------|
| 6Li (KED)  | 100.000 %             | 2,442 cps         | 8.7 %         |
| 9Be (KED)  | 0.000 ppb             | 0 cps             |               |
| 11B (KED)  | -2.187 ppb            | 1,395 cps         | 4.7 %         |
| 24Mg (KED) | -0.393 ppb            | 421 cps           | 24.7 %        |
| 27Al (KED) | -0.266 ppb            | 120 cps           | 16.9 %        |

| Category    | Concentration average | Intensity average | Intensity RSD |
|-------------|-----------------------|-------------------|---------------|
| 45Sc (KED)  | 100.000 %             | 38,274 cps        | 0.4 %         |
| 51V (KED)   | -0.002 ppb            | 11 cps            | 17.3 %        |
| 52Cr (KED)  | 0.000 ppb             | 187 cps           | 21.7 %        |
| 55Mn (KED)  | -0.027 ppb            | 312 cps           | 21.8 %        |
| 56Fe (KED)  | -0.123 ppb            | 6,272 cps         | 35.7 %        |
| 58Ni (KED)  | 0.002 ppb             | 457 cps           | 16.7 %        |
| 59Co (KED)  | 0.001 ppb             | 86 cps            | 21.5 %        |
| 63Cu (KED)  | -0.003 ppb            | 749 cps           | 22.0 %        |
| 64Zn (KED)  | -0.058 ppb            | 1,597 cps         | 19.7 %        |
| 69Ga (KED)  | -0.007 ppb            | 50 cps            | 24.0 %        |
| 75As (KED)  | -0.002 ppb            | 12 cps            | 41.7 %        |
| 80Se (KED)  | -0.555 ppb            | 1,097 cps         | 10.8 %        |
| 85Rb (KED)  | -0.002 ppb            | 21 cps            | 32.9 %        |
| 88Sr (KED)  | -0.003 ppb            | 222 cps           | 16.5 %        |
| 89Y (KED)   | 100.000 %             | 389,496 cps       | 1.6 %         |
| 107Ag (KED) | -0.001 ppb            | 88 cps            | 38.2 %        |
| 114Cd (KED) | 0.000 ppb             | 71 cps            | 17.7 %        |
| 115In (KED) | 100.000 %             | 759,333 cps       | 1.9 %         |
| 133Cs (KED) | 0.001 ppb             | 86 cps            | 12.5 %        |
| 138Ba (KED) | -0.017 ppb            | 1,679 cps         | 24.0 %        |
| 139La (KED) | 0.000 ppb             | 109 cps           | 16.9 %        |
| 140Ce (KED) | -0.001 ppb            | 327 cps           | 28.2 %        |
| 141Pr (KED) | 0.000 ppb             | 49 cps            | 23.9 %        |
| 142Nd (KED) | -0.001 ppb            | 68 cps            | 10.2 %        |
| 152Sm (KED) | 0.000 ppb             | 24 cps            | 15.7 %        |
| 153Eu (KED) | 0.000 ppb             | 36 cps            | 21.7 %        |
| 158Gd (KED) | 0.000 ppb             | 26 cps            | 49.4 %        |
| 159Tb (KED) | 100.000 %             | 4,257,954 cps     | 2.6 %         |
| 164Dy (KED) | 0.000 ppb             | 44 cps            | 35.4 %        |
| 166Er (KED) | 0.001 ppb             | 337 cps           | 12.6 %        |
| 169Tm (KED) | 0.000 ppb             | 44 cps            | 45.8 %        |
| 174Yb (KED) | 0.000 ppb             | 37 cps            | 9.1 %         |
| 175Lu (KED) | 0.004 ppb             | 21,352 cps        | 3.3 %         |
| 205Tl (KED) | 0.000 ppb             | 76 cps            | 29.4 %        |
| 208Pb (KED) | -0.079 ppb            | 31,019 cps        | 12.8 %        |
| 209Bi (KED) | 100.000 %             | 3,894,885 cps     | 0.9 %         |
| 232Th (KED) | -0.002 ppb            | 2,218 cps         | 12.2 %        |
| 238U (KED)  | -0.001 ppb            | 927 cps           | 16.5 %        |

# Comprehensive

9/30/2021 2:22:41 PM

## Sample Summary

Instrument ID: iCAP Q

Analysis index: 3

Analysis name: 0+20

Analysis started at: 9/30/2021 11:33:44 AM

User name: WINDOWS-UPCI4ER\Administrator

| Category    | Concentration average | Concentration RSD |
|-------------|-----------------------|-------------------|
| 6Li (KED)   | 99.545 %              |                   |
| 9Be (KED)   | 0.000 ppb             |                   |
| 11B (KED)   | 0.000 ppb             | 0.0 %             |
| 24Mg (KED)  | 0.000 ppb             | 0.0 %             |
| 27Al (KED)  | 0.000 ppb             | 0.2 %             |
| 45Sc (KED)  | 101.200 %             |                   |
| 51V (KED)   | 0.000 ppb             | 0.3 %             |
| 52Cr (KED)  | 0.000 ppb             | 0.1 %             |
| 55Mn (KED)  | 0.000 ppb             | 0.2 %             |
| 56Fe (KED)  | 0.000 ppb             | 0.1 %             |
| 58Ni (KED)  | 0.000 ppb             | 0.1 %             |
| 59Co (KED)  | 0.000 ppb             | 0.2 %             |
| 63Cu (KED)  | 0.000 ppb             | 0.1 %             |
| 64Zn (KED)  | 0.000 ppb             | 0.0 %             |
| 69Ga (KED)  | 0.000 ppb             | 0.1 %             |
| 75As (KED)  | 0.000 ppb             | 0.1 %             |
| 80Se (KED)  | 0.000 ppb             | 0.1 %             |
| 85Rb (KED)  | 0.000 ppb             | 0.6 %             |
| 88Sr (KED)  | 0.000 ppb             | 0.1 %             |
| 89Y (KED)   | 98.866 %              |                   |
| 107Ag (KED) | 0.000 ppb             | 0.1 %             |
| 114Cd (KED) | 0.000 ppb             | 0.1 %             |
| 115In (KED) | 99.833 %              |                   |
| 133Cs (KED) | 0.000 ppb             | 0.2 %             |
| 138Ba (KED) | 0.000 ppb             | 0.1 %             |
| 139La (KED) | 0.000 ppb             | 0.1 %             |
| 140Ce (KED) | 0.000 ppb             | 0.2 %             |
| 141Pr (KED) | 0.000 ppb             | 0.4 %             |
| 142Nd (KED) | 0.000 ppb             | 0.2 %             |
| 152Sm (KED) | 0.000 ppb             | 0.1 %             |
| 153Eu (KED) | 0.000 ppb             | 0.3 %             |
| 158Gd (KED) | 0.000 ppb             | 0.1 %             |
| 159Tb (KED) | 98.828 %              |                   |
| 164Dy (KED) | 0.000 ppb             | 0.3 %             |
| 166Er (KED) | 0.000 ppb             | 0.1 %             |
| 169Tm (KED) | 0.000 ppb             | 0.2 %             |
| 174Yb (KED) | 0.000 ppb             | 0.1 %             |
| 175Lu (KED) | 0.000 ppb             | 0.0 %             |
| 205Tl (KED) | 0.000 ppb             | 0.1 %             |
| 208Pb (KED) | 0.000 ppb             | 0.0 %             |
| 209Bi (KED) | 99.327 %              |                   |
| 232Th (KED) | 0.000 ppb             | 0.0 %             |
| 238U (KED)  | 0.000 ppb             | 0.1 %             |

| Category   | Concentration average | Intensity average | Intensity RSD |
|------------|-----------------------|-------------------|---------------|
| 6Li (KED)  | 99.545 %              | 2,431 cps         | 4.7 %         |
| 9Be (KED)  | 0.000 ppb             | 0 cps             |               |
| 11B (KED)  | 0.000 ppb             | 1,528 cps         | 4.8 %         |
| 24Mg (KED) | 0.000 ppb             | 587 cps           | 6.6 %         |
| 27Al (KED) | 0.000 ppb             | 152 cps           | 21.6 %        |

| Category    | Concentration average | Intensity average | Intensity RSD |
|-------------|-----------------------|-------------------|---------------|
| 45Sc (KED)  | 101.200 %             | 38,733 cps        | 1.7 %         |
| 51V (KED)   | 0.000 ppb             | 21 cps            | 32.9 %        |
| 52Cr (KED)  | 0.000 ppb             | 190 cps           | 15.8 %        |
| 55Mn (KED)  | 0.000 ppb             | 463 cps           | 14.9 %        |
| 56Fe (KED)  | 0.000 ppb             | 7,500 cps         | 7.5 %         |
| 58Ni (KED)  | 0.000 ppb             | 441 cps           | 9.6 %         |
| 59Co (KED)  | 0.000 ppb             | 62 cps            | 22.3 %        |
| 63Cu (KED)  | 0.000 ppb             | 782 cps           | 13.5 %        |
| 64Zn (KED)  | 0.000 ppb             | 1,799 cps         | 4.1 %         |
| 69Ga (KED)  | 0.000 ppb             | 84 cps            | 9.9 %         |
| 75As (KED)  | 0.000 ppb             | 14 cps            | 13.3 %        |
| 80Se (KED)  | 0.000 ppb             | 1,276 cps         | 7.5 %         |
| 85Rb (KED)  | 0.000 ppb             | 29 cps            | 63.5 %        |
| 88Sr (KED)  | 0.000 ppb             | 239 cps           | 10.1 %        |
| 89Y (KED)   | 98.866 %              | 385,078 cps       | 1.0 %         |
| 107Ag (KED) | 0.000 ppb             | 121 cps           | 13.9 %        |
| 114Cd (KED) | 0.000 ppb             | 74 cps            | 11.3 %        |
| 115In (KED) | 99.833 %              | 758,067 cps       | 0.5 %         |
| 133Cs (KED) | 0.000 ppb             | 68 cps            | 18.6 %        |
| 138Ba (KED) | 0.000 ppb             | 2,305 cps         | 6.0 %         |
| 139La (KED) | 0.000 ppb             | 128 cps           | 8.4 %         |
| 140Ce (KED) | 0.000 ppb             | 432 cps           | 18.2 %        |
| 141Pr (KED) | 0.000 ppb             | 67 cps            | 39.7 %        |
| 142Nd (KED) | 0.000 ppb             | 92 cps            | 20.9 %        |
| 152Sm (KED) | 0.000 ppb             | 31 cps            | 12.4 %        |
| 153Eu (KED) | 0.000 ppb             | 51 cps            | 29.4 %        |
| 158Gd (KED) | 0.000 ppb             | 33 cps            | 10.0 %        |
| 159Tb (KED) | 98.828 %              | 4,208,065 cps     | 0.9 %         |
| 164Dy (KED) | 0.000 ppb             | 44 cps            | 28.4 %        |
| 166Er (KED) | 0.000 ppb             | 288 cps           | 6.6 %         |
| 169Tm (KED) | 0.000 ppb             | 102 cps           | 21.7 %        |
| 174Yb (KED) | 0.000 ppb             | 69 cps            | 5.6 %         |
| 175Lu (KED) | 0.000 ppb             | 20,425 cps        | 3.7 %         |
| 205Tl (KED) | 0.000 ppb             | 62 cps            | 11.2 %        |
| 208Pb (KED) | 0.000 ppb             | 41,714 cps        | 4.4 %         |
| 209Bi (KED) | 99.327 %              | 3,868,681 cps     | 2.5 %         |
| 232Th (KED) | 0.000 ppb             | 2,873 cps         | 1.3 %         |
| 238U (KED)  | 0.000 ppb             | 1,362 cps         | 6.2 %         |

# Comprehensive

9/30/2021 2:22:41 PM

## Sample Summary

Instrument ID: iCAP Q

Analysis index: 4

Analysis name: 50+20

Analysis started at: 9/30/2021 11:36:49 AM

User name: WINDOWS-UPCI4ER\Administrator

| Category    | Concentration average | Concentration RSD |
|-------------|-----------------------|-------------------|
| 6Li (KED)   | 104.869 %             |                   |
| 9Be (KED)   | 69.554 ppb            | 8.0 %             |
| 11B (KED)   | 93.012 ppb            | 8.7 %             |
| 24Mg (KED)  | 68.084 ppb            | 7.0 %             |
| 27Al (KED)  | 70.533 ppb            | 2.3 %             |
| 45Sc (KED)  | 104.799 %             |                   |
| 51V (KED)   | 68.999 ppb            | 0.8 %             |
| 52Cr (KED)  | 69.238 ppb            | 1.3 %             |
| 55Mn (KED)  | 68.927 ppb            | 2.3 %             |
| 56Fe (KED)  | 69.065 ppb            | 1.2 %             |
| 58Ni (KED)  | 69.661 ppb            | 1.9 %             |
| 59Co (KED)  | 69.203 ppb            | 2.4 %             |
| 63Cu (KED)  | 68.438 ppb            | 0.3 %             |
| 64Zn (KED)  | 67.883 ppb            | 0.6 %             |
| 69Ga (KED)  | 67.385 ppb            | 0.8 %             |
| 75As (KED)  | 68.018 ppb            | 1.1 %             |
| 80Se (KED)  | 67.227 ppb            | 1.9 %             |
| 85Rb (KED)  | 67.839 ppb            | 0.1 %             |
| 88Sr (KED)  | 67.806 ppb            | 0.4 %             |
| 89Y (KED)   | 104.370 %             |                   |
| 107Ag (KED) | 69.336 ppb            | 0.8 %             |
| 114Cd (KED) | 69.205 ppb            | 0.5 %             |
| 115In (KED) | 103.935 %             |                   |
| 133Cs (KED) | 68.982 ppb            | 1.3 %             |
| 138Ba (KED) | 70.158 ppb            | 2.6 %             |
| 139La (KED) | 69.067 ppb            | 3.0 %             |
| 140Ce (KED) | 69.330 ppb            | 2.5 %             |
| 141Pr (KED) | 69.598 ppb            | 2.5 %             |
| 142Nd (KED) | 69.966 ppb            | 2.9 %             |
| 152Sm (KED) | 69.723 ppb            | 1.1 %             |
| 153Eu (KED) | 68.562 ppb            | 2.2 %             |
| 158Gd (KED) | 68.853 ppb            | 1.1 %             |
| 159Tb (KED) | 103.741 %             |                   |
| 164Dy (KED) | 68.197 ppb            | 1.2 %             |
| 166Er (KED) | 67.655 ppb            | 2.0 %             |
| 169Tm (KED) | 68.022 ppb            | 1.9 %             |
| 174Yb (KED) | 67.963 ppb            | 3.0 %             |
| 175Lu (KED) | 68.186 ppb            | 2.0 %             |
| 205Tl (KED) | 68.010 ppb            | 1.4 %             |
| 208Pb (KED) | 68.193 ppb            | 1.6 %             |
| 209Bi (KED) | 103.629 %             |                   |
| 232Th (KED) | 67.728 ppb            | 0.6 %             |
| 238U (KED)  | 68.122 ppb            | 1.2 %             |

| Category   | Concentration average | Intensity average | Intensity RSD |
|------------|-----------------------|-------------------|---------------|
| 6Li (KED)  | 104.869 %             | 2,561 cps         | 7.1 %         |
| 9Be (KED)  | 69.554 ppb            | 8,185 cps         | 3.7 %         |
| 11B (KED)  | 93.012 ppb            | 7,617 cps         | 2.6 %         |
| 24Mg (KED) | 68.084 ppb            | 31,708 cps        | 0.8 %         |
| 27Al (KED) | 70.533 ppb            | 8,637 cps         | 2.6 %         |

| Category    | Concentration average | Intensity average | Intensity RSD |
|-------------|-----------------------|-------------------|---------------|
| 45Sc (KED)  | 104.799 %             | 40,111 cps        | 0.6 %         |
| 51V (KED)   | 68.999 ppb            | 466,944 cps       | 0.8 %         |
| 52Cr (KED)  | 69.238 ppb            | 735,545 cps       | 1.3 %         |
| 55Mn (KED)  | 68.927 ppb            | 387,166 cps       | 2.3 %         |
| 56Fe (KED)  | 69.065 ppb            | 681,160 cps       | 1.1 %         |
| 58Ni (KED)  | 69.661 ppb            | 842,802 cps       | 1.6 %         |
| 59Co (KED)  | 69.203 ppb            | 1,414,459 cps     | 2.1 %         |
| 63Cu (KED)  | 68.438 ppb            | 1,032,052 cps     | 2.0 %         |
| 64Zn (KED)  | 67.883 ppb            | 278,024 cps       | 1.8 %         |
| 69Ga (KED)  | 67.385 ppb            | 361,401 cps       | 2.1 %         |
| 75As (KED)  | 68.018 ppb            | 82,286 cps        | 2.3 %         |
| 80Se (KED)  | 67.227 ppb            | 25,718 cps        | 3.9 %         |
| 85Rb (KED)  | 67.839 ppb            | 365,601 cps       | 2.4 %         |
| 88Sr (KED)  | 67.806 ppb            | 535,518 cps       | 2.7 %         |
| 89Y (KED)   | 104.370 %             | 406,518 cps       | 2.3 %         |
| 107Ag (KED) | 69.336 ppb            | 3,367,892 cps     | 2.4 %         |
| 114Cd (KED) | 69.205 ppb            | 1,256,884 cps     | 1.8 %         |
| 115In (KED) | 103.935 %             | 789,214 cps       | 1.6 %         |
| 133Cs (KED) | 68.982 ppb            | 2,039,457 cps     | 0.3 %         |
| 138Ba (KED) | 70.158 ppb            | 2,888,447 cps     | 1.6 %         |
| 139La (KED) | 69.067 ppb            | 5,779,407 cps     | 1.2 %         |
| 140Ce (KED) | 69.330 ppb            | 7,721,891 cps     | 1.9 %         |
| 141Pr (KED) | 69.598 ppb            | 8,284,239 cps     | 1.7 %         |
| 142Nd (KED) | 69.966 ppb            | 3,359,174 cps     | 1.2 %         |
| 152Sm (KED) | 69.723 ppb            | 3,152,897 cps     | 3.1 %         |
| 153Eu (KED) | 68.562 ppb            | 6,191,651 cps     | 1.9 %         |
| 158Gd (KED) | 68.853 ppb            | 4,193,233 cps     | 3.1 %         |
| 159Tb (KED) | 103.741 %             | 4,417,228 cps     | 4.1 %         |
| 164Dy (KED) | 68.197 ppb            | 4,857,216 cps     | 3.0 %         |
| 166Er (KED) | 67.655 ppb            | 5,795,373 cps     | 2.5 %         |
| 169Tm (KED) | 68.022 ppb            | 19,223,198 cps    | 2.4 %         |
| 174Yb (KED) | 67.963 ppb            | 6,950,040 cps     | 1.3 %         |
| 175Lu (KED) | 68.186 ppb            | 11,885,296 cps    | 2.8 %         |
| 205Tl (KED) | 68.010 ppb            | 14,049,592 cps    | 2.3 %         |
| 208Pb (KED) | 68.193 ppb            | 9,838,589 cps     | 1.2 %         |
| 209Bi (KED) | 103.629 %             | 4,036,227 cps     | 2.4 %         |
| 232Th (KED) | 67.728 ppb            | 20,610,558 cps    | 1.9 %         |
| 238U (KED)  | 68.122 ppb            | 23,857,625 cps    | 2.1 %         |

# Comprehensive

9/30/2021 2:22:41 PM

## Sample Summary

Instrument ID: iCAP Q

Analysis index: 5

Analysis name: 100+20

Analysis started at: 9/30/2021 11:40:10 AM

User name: WINDOWS-UPCI4ER\Administrator

| Category    | Concentration average | Concentration RSD |
|-------------|-----------------------|-------------------|
| 6Li (KED)   | 100.637 %             |                   |
| 9Be (KED)   | 104.085 ppb           | 6.5 %             |
| 11B (KED)   | 86.491 ppb            | 7.7 %             |
| 24Mg (KED)  | 105.187 ppb           | 5.9 %             |
| 27Al (KED)  | 103.350 ppb           | 1.6 %             |
| 45Sc (KED)  | 101.878 %             |                   |
| 51V (KED)   | 104.501 ppb           | 2.2 %             |
| 52Cr (KED)  | 104.322 ppb           | 2.2 %             |
| 55Mn (KED)  | 104.555 ppb           | 2.1 %             |
| 56Fe (KED)  | 104.451 ppb           | 2.1 %             |
| 58Ni (KED)  | 104.004 ppb           | 1.5 %             |
| 59Co (KED)  | 104.348 ppb           | 0.7 %             |
| 63Cu (KED)  | 104.921 ppb           | 1.1 %             |
| 64Zn (KED)  | 105.338 ppb           | 1.7 %             |
| 69Ga (KED)  | 105.711 ppb           | 1.3 %             |
| 75As (KED)  | 105.237 ppb           | 1.0 %             |
| 80Se (KED)  | 105.830 ppb           | 1.4 %             |
| 85Rb (KED)  | 105.371 ppb           | 1.4 %             |
| 88Sr (KED)  | 105.395 ppb           | 1.6 %             |
| 89Y (KED)   | 100.091 %             |                   |
| 107Ag (KED) | 104.248 ppb           | 2.4 %             |
| 114Cd (KED) | 104.347 ppb           | 1.1 %             |
| 115In (KED) | 101.283 %             |                   |
| 133Cs (KED) | 104.513 ppb           | 0.9 %             |
| 138Ba (KED) | 103.631 ppb           | 3.1 %             |
| 139La (KED) | 104.450 ppb           | 4.5 %             |
| 140Ce (KED) | 104.252 ppb           | 4.9 %             |
| 141Pr (KED) | 104.051 ppb           | 3.6 %             |
| 142Nd (KED) | 103.776 ppb           | 3.4 %             |
| 152Sm (KED) | 103.958 ppb           | 2.6 %             |
| 153Eu (KED) | 104.828 ppb           | 1.7 %             |
| 158Gd (KED) | 104.610 ppb           | 1.9 %             |
| 159Tb (KED) | 103.043 %             |                   |
| 164Dy (KED) | 105.102 ppb           | 1.3 %             |
| 166Er (KED) | 105.509 ppb           | 1.2 %             |
| 169Tm (KED) | 105.234 ppb           | 1.7 %             |
| 174Yb (KED) | 105.278 ppb           | 2.3 %             |
| 175Lu (KED) | 105.110 ppb           | 2.1 %             |
| 205Tl (KED) | 105.242 ppb           | 1.1 %             |
| 208Pb (KED) | 105.106 ppb           | 2.1 %             |
| 209Bi (KED) | 102.058 %             |                   |
| 232Th (KED) | 105.454 ppb           | 1.0 %             |
| 238U (KED)  | 105.159 ppb           | 0.8 %             |

| Category   | Concentration average | Intensity average | Intensity RSD |
|------------|-----------------------|-------------------|---------------|
| 6Li (KED)  | 100.637 %             | 2,458 cps         | 1.5 %         |
| 9Be (KED)  | 104.085 ppb           | 11,798 cps        | 7.5 %         |
| 11B (KED)  | 86.491 ppb            | 6,928 cps         | 6.8 %         |
| 24Mg (KED) | 105.187 ppb           | 46,850 cps        | 6.4 %         |
| 27Al (KED) | 103.350 ppb           | 12,232 cps        | 5.5 %         |

| Category    | Concentration average | Intensity average | Intensity RSD |
|-------------|-----------------------|-------------------|---------------|
| 45Sc (KED)  | 101.878 %             | 38,993 cps        | 5.2 %         |
| 51V (KED)   | 104.501 ppb           | 688,015 cps       | 7.3 %         |
| 52Cr (KED)  | 104.322 ppb           | 1,077,682 cps     | 6.5 %         |
| 55Mn (KED)  | 104.555 ppb           | 571,081 cps       | 7.2 %         |
| 56Fe (KED)  | 104.451 ppb           | 998,206 cps       | 7.0 %         |
| 58Ni (KED)  | 104.004 ppb           | 1,223,722 cps     | 6.6 %         |
| 59Co (KED)  | 104.348 ppb           | 2,073,879 cps     | 5.8 %         |
| 63Cu (KED)  | 104.921 ppb           | 1,516,620 cps     | 5.1 %         |
| 64Zn (KED)  | 105.338 ppb           | 413,007 cps       | 7.2 %         |
| 69Ga (KED)  | 105.711 ppb           | 543,805 cps       | 6.3 %         |
| 75As (KED)  | 105.237 ppb           | 122,080 cps       | 5.5 %         |
| 80Se (KED)  | 105.830 ppb           | 38,062 cps        | 5.0 %         |
| 85Rb (KED)  | 105.371 ppb           | 544,283 cps       | 4.4 %         |
| 88Sr (KED)  | 105.395 ppb           | 797,853 cps       | 5.2 %         |
| 89Y (KED)   | 100.091 %             | 389,849 cps       | 5.7 %         |
| 107Ag (KED) | 104.248 ppb           | 4,932,718 cps     | 6.0 %         |
| 114Cd (KED) | 104.347 ppb           | 1,846,786 cps     | 6.4 %         |
| 115In (KED) | 101.283 %             | 769,077 cps       | 6.2 %         |
| 133Cs (KED) | 104.513 ppb           | 3,010,904 cps     | 5.8 %         |
| 138Ba (KED) | 103.631 ppb           | 4,240,522 cps     | 5.3 %         |
| 139La (KED) | 104.450 ppb           | 8,692,327 cps     | 6.7 %         |
| 140Ce (KED) | 104.252 ppb           | 11,543,122 cps    | 6.5 %         |
| 141Pr (KED) | 104.051 ppb           | 12,310,954 cps    | 5.2 %         |
| 142Nd (KED) | 103.776 ppb           | 4,952,586 cps     | 4.7 %         |
| 152Sm (KED) | 103.958 ppb           | 4,670,725 cps     | 4.4 %         |
| 153Eu (KED) | 104.828 ppb           | 9,406,410 cps     | 2.8 %         |
| 158Gd (KED) | 104.610 ppb           | 6,328,791 cps     | 3.4 %         |
| 159Tb (KED) | 103.043 %             | 4,387,518 cps     | 3.5 %         |
| 164Dy (KED) | 105.102 ppb           | 7,435,360 cps     | 2.3 %         |
| 166Er (KED) | 105.509 ppb           | 8,979,712 cps     | 2.9 %         |
| 169Tm (KED) | 105.234 ppb           | 29,542,056 cps    | 1.9 %         |
| 174Yb (KED) | 105.278 ppb           | 10,696,302 cps    | 1.3 %         |
| 175Lu (KED) | 105.110 ppb           | 18,191,450 cps    | 3.4 %         |
| 205Tl (KED) | 105.242 ppb           | 21,413,862 cps    | 2.3 %         |
| 208Pb (KED) | 105.106 ppb           | 14,916,791 cps    | 3.5 %         |
| 209Bi (KED) | 102.058 %             | 3,975,044 cps     | 1.9 %         |
| 232Th (KED) | 105.454 ppb           | 31,602,572 cps    | 1.3 %         |
| 238U (KED)  | 105.159 ppb           | 36,274,486 cps    | 2.3 %         |

# Comprehensive

9/30/2021 2:22:41 PM

## Sample Summary

Instrument ID: iCAP Q

Analysis index: 6

Analysis name: 024750(17847)jian

Analysis started at: 9/30/2021 11:43:39 AM

User name: WINDOWS-UPCI4ER\Administrator

| Category    | Concentration average | Concentration RSD |
|-------------|-----------------------|-------------------|
| 6Li (KED)   | 76.116 %              | 88.2 %            |
| 9Be (KED)   | 14.532 ppb            | 172.0 %           |
| 11B (KED)   | 125.265 ppb           | 196.7 %           |
| 24Mg (KED)  | 224.533 ppb           | 67.9 %            |
| 27Al (KED)  | 303.652 ppb           | 52.4 %            |
| 45Sc (KED)  | 69.610 %              | 87.0 %            |
| 51V (KED)   | 22.051 ppb            | 167.3 %           |
| 52Cr (KED)  | 30.865 ppb            | 154.2 %           |
| 55Mn (KED)  | 27.701 ppb            | 110.2 %           |
| 56Fe (KED)  | 314.980 ppb           | 68.7 %            |
| 58Ni (KED)  | 23.684 ppb            | 154.7 %           |
| 59Co (KED)  | 21.155 ppb            | 171.2 %           |
| 63Cu (KED)  | 34.840 ppb            | 129.2 %           |
| 64Zn (KED)  | 144.559 ppb           | 7.5 %             |
| 69Ga (KED)  | 24.858 ppb            | 164.3 %           |
| 75As (KED)  | 38.395 ppb            | 171.1 %           |
| 80Se (KED)  | 1,505.717 ppb         | 173.2 %           |
| 85Rb (KED)  | 24.289 ppb            | 158.1 %           |
| 88Sr (KED)  | 22.217 ppb            | 136.1 %           |
| 89Y (KED)   | 69.413 %              | 86.8 %            |
| 107Ag (KED) | 18.610 ppb            | 171.7 %           |
| 114Cd (KED) | 24.765 ppb            | 172.6 %           |
| 115In (KED) | 67.217 %              | 86.5 %            |
| 133Cs (KED) | 18.485 ppb            | 171.9 %           |
| 138Ba (KED) | 26.624 ppb            | 140.1 %           |
| 139La (KED) | 32.438 ppb            | 170.4 %           |
| 140Ce (KED) | 30.219 ppb            | 168.3 %           |
| 141Pr (KED) | 28.488 ppb            | 171.2 %           |
| 142Nd (KED) | 27.737 ppb            | 169.2 %           |
| 152Sm (KED) | 26.806 ppb            | 171.0 %           |
| 153Eu (KED) | 27.283 ppb            | 171.4 %           |
| 158Gd (KED) | 27.692 ppb            | 171.3 %           |
| 159Tb (KED) | 74.480 %              | 86.5 %            |
| 164Dy (KED) | 26.367 ppb            | 171.3 %           |
| 166Er (KED) | 25.772 ppb            | 171.4 %           |
| 169Tm (KED) | 24.839 ppb            | 171.4 %           |
| 174Yb (KED) | 26.591 ppb            | 171.5 %           |
| 175Lu (KED) | 24.792 ppb            | 171.5 %           |
| 205Tl (KED) | 25.969 ppb            | 172.8 %           |
| 208Pb (KED) | 33.430 ppb            | 168.1 %           |
| 209Bi (KED) | 62.968 %              | 86.6 %            |
| 232Th (KED) | 22.784 ppb            | 162.8 %           |
| 238U (KED)  | 31.929 ppb            | 171.7 %           |

| Category   | Concentration average | Intensity average | Intensity RSD |
|------------|-----------------------|-------------------|---------------|
| 6Li (KED)  | 76.116 %              | 1,859 cps         | 88.2 %        |
| 9Be (KED)  | 14.532 ppb            | 10 cps            | 120.2 %       |
| 11B (KED)  | 125.265 ppb           | 376 cps           | 78.2 %        |
| 24Mg (KED) | 224.533 ppb           | 103,836 cps       | 87.4 %        |
| 27Al (KED) | 303.652 ppb           | 31,698 cps        | 87.3 %        |

| Category    | Concentration average | Intensity average | Intensity RSD |
|-------------|-----------------------|-------------------|---------------|
| 45Sc (KED)  | 69.610 %              | 26,643 cps        | 87.0 %        |
| 51V (KED)   | 22.051 ppb            | 3,500 cps         | 77.0 %        |
| 52Cr (KED)  | 30.865 ppb            | 24,286 cps        | 84.0 %        |
| 55Mn (KED)  | 27.701 ppb            | 37,950 cps        | 86.5 %        |
| 56Fe (KED)  | 314.980 ppb           | 2,855,429 cps     | 87.4 %        |
| 58Ni (KED)  | 23.684 ppb            | 20,798 cps        | 83.9 %        |
| 59Co (KED)  | 21.155 ppb            | 3,725 cps         | 59.3 %        |
| 63Cu (KED)  | 34.840 ppb            | 89,624 cps        | 86.0 %        |
| 64Zn (KED)  | 144.559 ppb           | 409,094 cps       | 87.1 %        |
| 69Ga (KED)  | 24.858 ppb            | 4,724 cps         | 80.9 %        |
| 75As (KED)  | 38.395 ppb            | 423 cps           | 63.8 %        |
| 80Se (KED)  | 1,505.717 ppb         | 1,381 cps         | 2.9 %         |
| 85Rb (KED)  | 24.289 ppb            | 7,687 cps         | 83.5 %        |
| 88Sr (KED)  | 22.217 ppb            | 25,253 cps        | 85.6 %        |
| 89Y (KED)   | 69.413 %              | 270,360 cps       | 86.8 %        |
| 107Ag (KED) | 18.610 ppb            | 5,934 cps         | 64.2 %        |
| 114Cd (KED) | 24.765 ppb            | 1,448 cps         | 33.5 %        |
| 115In (KED) | 67.217 %              | 510,398 cps       | 86.5 %        |
| 133Cs (KED) | 18.485 ppb            | 3,242 cps         | 52.2 %        |
| 138Ba (KED) | 26.624 ppb            | 152,802 cps       | 85.2 %        |
| 139La (KED) | 32.438 ppb            | 34,129 cps        | 88.4 %        |
| 140Ce (KED) | 30.219 ppb            | 71,564 cps        | 85.7 %        |
| 141Pr (KED) | 28.488 ppb            | 31,055 cps        | 116.6 %       |
| 142Nd (KED) | 27.737 ppb            | 23,463 cps        | 92.0 %        |
| 152Sm (KED) | 26.806 ppb            | 11,847 cps        | 124.0 %       |
| 153Eu (KED) | 27.283 ppb            | 20,383 cps        | 134.9 %       |
| 158Gd (KED) | 27.692 ppb            | 14,689 cps        | 121.0 %       |
| 159Tb (KED) | 74.480 %              | 3,171,343 cps     | 86.5 %        |
| 164Dy (KED) | 26.367 ppb            | 16,000 cps        | 124.5 %       |
| 166Er (KED) | 25.772 ppb            | 18,041 cps        | 127.9 %       |
| 169Tm (KED) | 24.839 ppb            | 57,110 cps        | 136.9 %       |
| 174Yb (KED) | 26.591 ppb            | 21,017 cps        | 130.5 %       |
| 175Lu (KED) | 24.792 ppb            | 48,793 cps        | 109.6 %       |
| 205Tl (KED) | 25.969 ppb            | 10,426 cps        | 39.7 %        |
| 208Pb (KED) | 33.430 ppb            | 116,388 cps       | 80.4 %        |
| 209Bi (KED) | 62.968 %              | 2,452,513 cps     | 86.6 %        |
| 232Th (KED) | 22.784 ppb            | 265,371 cps       | 150.7 %       |
| 238U (KED)  | 31.929 ppb            | 68,720 cps        | 120.4 %       |

# Comprehensive

9/30/2021 2:22:41 PM

## Sample Summary

Instrument ID: iCAP Q

Analysis index: 7

Analysis name: 028425(027)jian

Analysis started at: 9/30/2021 11:47:16 AM

User name: WINDOWS-UPCI4ER\Administrator

| Category    | Concentration average | Concentration RSD |
|-------------|-----------------------|-------------------|
| 6Li (KED)   | 118.156 %             | 18.5 %            |
| 9Be (KED)   | 0.051 ppb             | 20.6 %            |
| 11B (KED)   | -18.476 ppb           | 1.7 %             |
| 24Mg (KED)  | 557.265 ppb           | 5.4 %             |
| 27Al (KED)  | 663.258 ppb           | 3.1 %             |
| 45Sc (KED)  | 109.312 %             | 12.6 %            |
| 51V (KED)   | 1.376 ppb             | 4.7 %             |
| 52Cr (KED)  | 3.823 ppb             | 2.8 %             |
| 55Mn (KED)  | 22.548 ppb            | 0.9 %             |
| 56Fe (KED)  | 849.421 ppb           | 0.6 %             |
| 58Ni (KED)  | 4.210 ppb             | 1.2 %             |
| 59Co (KED)  | 0.416 ppb             | 1.6 %             |
| 63Cu (KED)  | 10.643 ppb            | 3.8 %             |
| 64Zn (KED)  | 150.482 ppb           | 3.1 %             |
| 69Ga (KED)  | 1.743 ppb             | 6.2 %             |
| 75As (KED)  | 0.655 ppb             | 1.4 %             |
| 80Se (KED)  | -0.292 ppb            | 164.3 %           |
| 85Rb (KED)  | 1.845 ppb             | 2.7 %             |
| 88Sr (KED)  | 8.764 ppb             | 0.9 %             |
| 89Y (KED)   | 103.182 %             | 7.6 %             |
| 107Ag (KED) | 0.152 ppb             | 3.7 %             |
| 114Cd (KED) | 0.057 ppb             | 7.1 %             |
| 115In (KED) | 98.419 %              | 6.0 %             |
| 133Cs (KED) | 0.160 ppb             | 3.2 %             |
| 138Ba (KED) | 7.475 ppb             | 1.2 %             |
| 139La (KED) | 0.705 ppb             | 1.3 %             |
| 140Ce (KED) | 1.457 ppb             | 1.7 %             |
| 141Pr (KED) | 0.175 ppb             | 2.5 %             |
| 142Nd (KED) | 0.916 ppb             | 3.7 %             |
| 152Sm (KED) | 0.140 ppb             | 4.7 %             |
| 153Eu (KED) | 0.033 ppb             | 7.8 %             |
| 158Gd (KED) | 0.122 ppb             | 4.4 %             |
| 159Tb (KED) | 101.769 %             | 6.9 %             |
| 164Dy (KED) | 0.086 ppb             | 6.3 %             |
| 166Er (KED) | 0.046 ppb             | 4.2 %             |
| 169Tm (KED) | 0.013 ppb             | 17.6 %            |
| 174Yb (KED) | 0.038 ppb             | 11.3 %            |
| 175Lu (KED) | 0.009 ppb             | 113.2 %           |
| 205Tl (KED) | 0.025 ppb             | 8.7 %             |
| 208Pb (KED) | 1.500 ppb             | 1.1 %             |
| 209Bi (KED) | 87.925 %              | 5.5 %             |
| 232Th (KED) | 0.258 ppb             | 6.0 %             |
| 238U (KED)  | 0.077 ppb             | 4.5 %             |

| Category   | Concentration average | Intensity average | Intensity RSD |
|------------|-----------------------|-------------------|---------------|
| 6Li (KED)  | 118.156 %             | 2,886 cps         | 18.5 %        |
| 9Be (KED)  | 0.051 ppb             | 7 cps             | 0.0 %         |
| 11B (KED)  | -18.476 ppb           | 464 cps           | 20.3 %        |
| 24Mg (KED) | 557.265 ppb           | 286,552 cps       | 14.1 %        |
| 27Al (KED) | 663.258 ppb           | 83,549 cps        | 15.4 %        |

# Comprehensive

9/30/2021 2:22:41 PM

| Category    | Concentration average | Intensity average | Intensity RSD |
|-------------|-----------------------|-------------------|---------------|
| 45Sc (KED)  | 109.312 %             | 41,838 cps        | 12.6 %        |
| 51V (KED)   | 1.376 ppb             | 9,771 cps         | 16.9 %        |
| 52Cr (KED)  | 3.823 ppb             | 42,660 cps        | 15.2 %        |
| 55Mn (KED)  | 22.548 ppb            | 132,546 cps       | 13.4 %        |
| 56Fe (KED)  | 849.421 ppb           | 8,646,823 cps     | 12.6 %        |
| 58Ni (KED)  | 4.210 ppb             | 53,594 cps        | 13.1 %        |
| 59Co (KED)  | 0.416 ppb             | 8,919 cps         | 11.2 %        |
| 63Cu (KED)  | 10.643 ppb            | 159,657 cps       | 11.0 %        |
| 64Zn (KED)  | 150.482 ppb           | 607,983 cps       | 10.5 %        |
| 69Ga (KED)  | 1.743 ppb             | 9,353 cps         | 13.1 %        |
| 75As (KED)  | 0.655 ppb             | 799 cps           | 7.9 %         |
| 80Se (KED)  | -0.292 ppb            | 1,219 cps         | 6.0 %         |
| 85Rb (KED)  | 1.845 ppb             | 9,863 cps         | 8.3 %         |
| 88Sr (KED)  | 8.764 ppb             | 68,641 cps        | 7.5 %         |
| 89Y (KED)   | 103.182 %             | 401,888 cps       | 7.6 %         |
| 107Ag (KED) | 0.152 ppb             | 7,103 cps         | 2.5 %         |
| 114Cd (KED) | 0.057 ppb             | 1,058 cps         | 3.3 %         |
| 115In (KED) | 98.419 %              | 747,326 cps       | 6.0 %         |
| 133Cs (KED) | 0.160 ppb             | 4,545 cps         | 3.8 %         |
| 138Ba (KED) | 7.475 ppb             | 304,296 cps       | 7.4 %         |
| 139La (KED) | 0.705 ppb             | 58,013 cps        | 5.9 %         |
| 140Ce (KED) | 1.457 ppb             | 159,621 cps       | 5.5 %         |
| 141Pr (KED) | 0.175 ppb             | 20,533 cps        | 4.6 %         |
| 142Nd (KED) | 0.916 ppb             | 43,235 cps        | 4.6 %         |
| 152Sm (KED) | 0.140 ppb             | 6,213 cps         | 2.8 %         |
| 153Eu (KED) | 0.033 ppb             | 2,978 cps         | 2.4 %         |
| 158Gd (KED) | 0.122 ppb             | 7,289 cps         | 3.3 %         |
| 159Tb (KED) | 101.769 %             | 4,333,297 cps     | 6.9 %         |
| 164Dy (KED) | 0.086 ppb             | 6,027 cps         | 1.0 %         |
| 166Er (KED) | 0.046 ppb             | 4,171 cps         | 3.3 %         |
| 169Tm (KED) | 0.013 ppb             | 3,609 cps         | 9.9 %         |
| 174Yb (KED) | 0.038 ppb             | 3,861 cps         | 5.2 %         |
| 175Lu (KED) | 0.009 ppb             | 22,471 cps        | 3.2 %         |
| 205Tl (KED) | 0.025 ppb             | 4,435 cps         | 3.4 %         |
| 208Pb (KED) | 1.500 ppb             | 219,805 cps       | 6.3 %         |
| 209Bi (KED) | 87.925 %              | 3,424,591 cps     | 5.5 %         |
| 232Th (KED) | 0.258 ppb             | 69,100 cps        | 0.1 %         |
| 238U (KED)  | 0.077 ppb             | 23,972 cps        | 3.2 %         |

# Comprehensive

9/30/2021 2:22:41 PM

## Sample Summary

Instrument ID: iCAP Q

Analysis index: 8

Analysis name: 046127(179227)

Analysis started at: 9/30/2021 11:50:36 AM

User name: WINDOWS-UPCI4ER\Administrator

| Category    | Concentration average | Concentration RSD |
|-------------|-----------------------|-------------------|
| 6Li (KED)   | 119.475 %             | 5.0 %             |
| 9Be (KED)   | 0.074 ppb             | 5.1 %             |
| 11B (KED)   | -11.600 ppb           | 9.0 %             |
| 24Mg (KED)  | 1,246.622 ppb         | 4.8 %             |
| 27Al (KED)  | 1,636.118 ppb         | 2.0 %             |
| 45Sc (KED)  | 120.704 %             | 1.4 %             |
| 51V (KED)   | 3.081 ppb             | 0.6 %             |
| 52Cr (KED)  | 4.786 ppb             | 0.7 %             |
| 55Mn (KED)  | 42.227 ppb            | 1.6 %             |
| 56Fe (KED)  | 1,911.735 ppb         | 1.0 %             |
| 58Ni (KED)  | 9.216 ppb             | 0.7 %             |
| 59Co (KED)  | 0.846 ppb             | 0.4 %             |
| 63Cu (KED)  | 13.701 ppb            | 0.6 %             |
| 64Zn (KED)  | 148.585 ppb           | 1.8 %             |
| 69Ga (KED)  | 3.323 ppb             | 2.3 %             |
| 75As (KED)  | 0.912 ppb             | 5.9 %             |
| 80Se (KED)  | -0.529 ppb            | 9.4 %             |
| 85Rb (KED)  | 3.769 ppb             | 1.5 %             |
| 88Sr (KED)  | 16.231 ppb            | 2.7 %             |
| 89Y (KED)   | 110.499 %             | 1.3 %             |
| 107Ag (KED) | 0.062 ppb             | 4.6 %             |
| 114Cd (KED) | 0.064 ppb             | 12.4 %            |
| 115In (KED) | 99.234 %              | 1.6 %             |
| 133Cs (KED) | 0.374 ppb             | 2.0 %             |
| 138Ba (KED) | 13.583 ppb            | 1.7 %             |
| 139La (KED) | 1.592 ppb             | 0.9 %             |
| 140Ce (KED) | 3.228 ppb             | 2.0 %             |
| 141Pr (KED) | 0.393 ppb             | 1.8 %             |
| 142Nd (KED) | 2.034 ppb             | 2.4 %             |
| 152Sm (KED) | 0.295 ppb             | 3.8 %             |
| 153Eu (KED) | 0.066 ppb             | 4.8 %             |
| 158Gd (KED) | 0.257 ppb             | 0.5 %             |
| 159Tb (KED) | 102.395 %             | 0.8 %             |
| 164Dy (KED) | 0.181 ppb             | 5.5 %             |
| 166Er (KED) | 0.093 ppb             | 1.3 %             |
| 169Tm (KED) | 0.020 ppb             | 9.9 %             |
| 174Yb (KED) | 0.075 ppb             | 4.7 %             |
| 175Lu (KED) | 0.012 ppb             | 55.6 %            |
| 205Tl (KED) | 0.037 ppb             | 7.5 %             |
| 208Pb (KED) | 2.606 ppb             | 2.1 %             |
| 209Bi (KED) | 86.961 %              | 2.6 %             |
| 232Th (KED) | 0.593 ppb             | 0.8 %             |
| 238U (KED)  | 0.139 ppb             | 0.9 %             |

| Category   | Concentration average | Intensity average | Intensity RSD |
|------------|-----------------------|-------------------|---------------|
| 6Li (KED)  | 119.475 %             | 2,918 cps         | 5.0 %         |
| 9Be (KED)  | 0.074 ppb             | 10 cps            | 0.0 %         |
| 11B (KED)  | -11.600 ppb           | 976 cps           | 6.8 %         |
| 24Mg (KED) | 1,246.622 ppb         | 650,393 cps       | 1.1 %         |
| 27Al (KED) | 1,636.118 ppb         | 226,688 cps       | 1.1 %         |

# Comprehensive

9/30/2021 2:22:41 PM

| Category    | Concentration average | Intensity average | Intensity RSD |
|-------------|-----------------------|-------------------|---------------|
| 45Sc (KED)  | 120.704 %             | 46,199 cps        | 1.4 %         |
| 51V (KED)   | 3.081 ppb             | 24,039 cps        | 1.4 %         |
| 52Cr (KED)  | 4.786 ppb             | 58,775 cps        | 1.5 %         |
| 55Mn (KED)  | 42.227 ppb            | 273,365 cps       | 0.3 %         |
| 56Fe (KED)  | 1,911.735 ppb         | 21,476,899 cps    | 1.1 %         |
| 58Ni (KED)  | 9.216 ppb             | 128,875 cps       | 0.7 %         |
| 59Co (KED)  | 0.846 ppb             | 19,979 cps        | 1.7 %         |
| 63Cu (KED)  | 13.701 ppb            | 219,457 cps       | 1.8 %         |
| 64Zn (KED)  | 148.585 ppb           | 641,879 cps       | 1.3 %         |
| 69Ga (KED)  | 3.323 ppb             | 18,957 cps        | 1.8 %         |
| 75As (KED)  | 0.912 ppb             | 1,185 cps         | 6.6 %         |
| 80Se (KED)  | -0.529 ppb            | 1,223 cps         | 2.1 %         |
| 85Rb (KED)  | 3.769 ppb             | 21,530 cps        | 0.5 %         |
| 88Sr (KED)  | 16.231 ppb            | 135,883 cps       | 1.8 %         |
| 89Y (KED)   | 110.499 %             | 430,391 cps       | 1.3 %         |
| 107Ag (KED) | 0.062 ppb             | 3,013 cps         | 5.9 %         |
| 114Cd (KED) | 0.064 ppb             | 1,186 cps         | 12.9 %        |
| 115In (KED) | 99.234 %              | 753,515 cps       | 1.6 %         |
| 133Cs (KED) | 0.374 ppb             | 10,616 cps        | 3.2 %         |
| 138Ba (KED) | 13.583 ppb            | 554,263 cps       | 1.3 %         |
| 139La (KED) | 1.592 ppb             | 131,689 cps       | 0.3 %         |
| 140Ce (KED) | 3.228 ppb             | 355,486 cps       | 1.7 %         |
| 141Pr (KED) | 0.393 ppb             | 46,265 cps        | 2.0 %         |
| 142Nd (KED) | 2.034 ppb             | 96,588 cps        | 3.2 %         |
| 152Sm (KED) | 0.295 ppb             | 13,206 cps        | 4.1 %         |
| 153Eu (KED) | 0.066 ppb             | 5,926 cps         | 4.6 %         |
| 158Gd (KED) | 0.257 ppb             | 15,464 cps        | 0.5 %         |
| 159Tb (KED) | 102.395 %             | 4,359,938 cps     | 0.8 %         |
| 164Dy (KED) | 0.181 ppb             | 12,779 cps        | 5.9 %         |
| 166Er (KED) | 0.093 ppb             | 8,203 cps         | 1.2 %         |
| 169Tm (KED) | 0.020 ppb             | 5,684 cps         | 9.6 %         |
| 174Yb (KED) | 0.075 ppb             | 7,673 cps         | 4.4 %         |
| 175Lu (KED) | 0.012 ppb             | 23,232 cps        | 4.6 %         |
| 205Tl (KED) | 0.037 ppb             | 6,496 cps         | 9.2 %         |
| 208Pb (KED) | 2.606 ppb             | 350,664 cps       | 1.0 %         |
| 209Bi (KED) | 86.961 %              | 3,387,036 cps     | 2.6 %         |
| 232Th (KED) | 0.593 ppb             | 153,983 cps       | 2.9 %         |
| 238U (KED)  | 0.139 ppb             | 42,160 cps        | 3.4 %         |

# Comprehensive

9/30/2021 2:22:41 PM

## Sample Summary

Instrument ID: iCAP Q

Analysis index: 9

Analysis name: 179184jian

Analysis started at: 9/30/2021 11:54:03 AM

User name: WINDOWS-UPCI4ER\Administrator

| Category    | Concentration average | Concentration RSD |
|-------------|-----------------------|-------------------|
| 6Li (KED)   | 0.136 %               | 0.0 %             |
| 9Be (KED)   | 0.000 ppb             |                   |
| 11B (KED)   | 54.191 ppb            | 72.9 %            |
| 24Mg (KED)  | 35.922 ppb            | 114.7 %           |
| 27Al (KED)  | 981.111 ppb           | 48.2 %            |
| 45Sc (KED)  | 0.017 %               | 50.0 %            |
| 51V (KED)   | 4.278 ppb             | 104.1 %           |
| 52Cr (KED)  | 12.990 ppb            | 55.1 %            |
| 55Mn (KED)  | 25.336 ppb            | 14.4 %            |
| 56Fe (KED)  | 497.938 ppb           | 70.0 %            |
| 58Ni (KED)  | 18.943 ppb            | 27.1 %            |
| 59Co (KED)  | 2.722 ppb             | 70.4 %            |
| 63Cu (KED)  | 171.826 ppb           | 107.4 %           |
| 64Zn (KED)  | 887.405 ppb           | 102.1 %           |
| 69Ga (KED)  | 21.145 ppb            | 124.2 %           |
| 75As (KED)  | 365.659 ppb           | 152.2 %           |
| 80Se (KED)  | 159,593.880 ppb       | 131.4 %           |
| 85Rb (KED)  | 38.327 ppb            | 96.0 %            |
| 88Sr (KED)  | 32.347 ppb            | 62.4 %            |
| 89Y (KED)   | 0.014 %               | 136.2 %           |
| 107Ag (KED) | 4.008 ppb             | 53.7 %            |
| 114Cd (KED) | 2.188 ppb             | 62.7 %            |
| 115In (KED) | 0.029 %               | 47.3 %            |
| 133Cs (KED) | 3.972 ppb             | 108.6 %           |
| 138Ba (KED) | 11.376 ppb            | 24.9 %            |
| 139La (KED) | 3.573 ppb             | 53.7 %            |
| 140Ce (KED) | 5.750 ppb             | 30.7 %            |
| 141Pr (KED) | 8.690 ppb             | 83.1 %            |
| 142Nd (KED) | 8.002 ppb             | 45.5 %            |
| 152Sm (KED) | 3.837 ppb             | 153.4 %           |
| 153Eu (KED) | 5.757 ppb             | 61.6 %            |
| 158Gd (KED) | 5.562 ppb             | 136.2 %           |
| 159Tb (KED) | 0.013 %               | 140.1 %           |
| 164Dy (KED) | 4.470 ppb             | 149.1 %           |
| 166Er (KED) | 2.809 ppb             | 155.5 %           |
| 169Tm (KED) | 4.812 ppb             | 68.1 %            |
| 174Yb (KED) | 5.468 ppb             | 83.3 %            |
| 175Lu (KED) | 2.981 ppb             | 102.1 %           |
| 205Tl (KED) | 16.291 ppb            | 62.3 %            |
| 208Pb (KED) | 39.125 ppb            | 55.3 %            |
| 209Bi (KED) | 0.010 %               | 93.8 %            |
| 232Th (KED) | 2.471 ppb             | 28.7 %            |
| 238U (KED)  | 2.856 ppb             | 51.7 %            |

| Category   | Concentration average | Intensity average | Intensity RSD |
|------------|-----------------------|-------------------|---------------|
| 6Li (KED)  | 0.136 %               | 3 cps             | 0.0 %         |
| 9Be (KED)  | 0.000 ppb             | 0 cps             |               |
| 11B (KED)  | 54.191 ppb            | 7 cps             | 50.0 %        |
| 24Mg (KED) | 35.922 ppb            | 22 cps            | 110.6 %       |
| 27Al (KED) | 981.111 ppb           | 21 cps            | 91.2 %        |

# Comprehensive

9/30/2021 2:22:41 PM

| Category    | Concentration average | Intensity average | Intensity RSD |
|-------------|-----------------------|-------------------|---------------|
| 45Sc (KED)  | 0.017 %               | 7 cps             | 50.0 %        |
| 51V (KED)   | 4.278 ppb             | 6 cps             | 91.7 %        |
| 52Cr (KED)  | 12.990 ppb            | 20 cps            | 57.7 %        |
| 55Mn (KED)  | 25.336 ppb            | 23 cps            | 51.5 %        |
| 56Fe (KED)  | 497.938 ppb           | 988 cps           | 105.6 %       |
| 58Ni (KED)  | 18.943 ppb            | 38 cps            | 48.6 %        |
| 59Co (KED)  | 2.722 ppb             | 9 cps             | 78.1 %        |
| 63Cu (KED)  | 171.826 ppb           | 80 cps            | 38.2 %        |
| 64Zn (KED)  | 887.405 ppb           | 130 cps           | 54.0 %        |
| 69Ga (KED)  | 21.145 ppb            | 12 cps            | 95.8 %        |
| 75As (KED)  | 365.659 ppb           | 9 cps             | 57.3 %        |
| 80Se (KED)  | 159,593.880 ppb       | 1,218 cps         | 2.2 %         |
| 85Rb (KED)  | 38.327 ppb            | 6 cps             | 69.3 %        |
| 88Sr (KED)  | 32.347 ppb            | 16 cps            | 86.6 %        |
| 89Y (KED)   | 0.014 %               | 53 cps            | 136.2 %       |
| 107Ag (KED) | 4.008 ppb             | 49 cps            | 47.9 %        |
| 114Cd (KED) | 2.188 ppb             | 9 cps             | 21.7 %        |
| 115In (KED) | 0.029 %               | 219 cps           | 47.3 %        |
| 133Cs (KED) | 3.972 ppb             | 24 cps            | 68.6 %        |
| 138Ba (KED) | 11.376 ppb            | 47 cps            | 124.5 %       |
| 139La (KED) | 3.573 ppb             | 26 cps            | 108.6 %       |
| 140Ce (KED) | 5.750 ppb             | 74 cps            | 131.5 %       |
| 141Pr (KED) | 8.690 ppb             | 49 cps            | 63.0 %        |
| 142Nd (KED) | 8.002 ppb             | 28 cps            | 102.1 %       |
| 152Sm (KED) | 3.837 ppb             | 10 cps            | 88.2 %        |
| 153Eu (KED) | 5.757 ppb             | 28 cps            | 73.3 %        |
| 158Gd (KED) | 5.562 ppb             | 27 cps            | 94.4 %        |
| 159Tb (KED) | 0.013 %               | 554 cps           | 140.1 %       |
| 164Dy (KED) | 4.470 ppb             | 20 cps            | 86.6 %        |
| 166Er (KED) | 2.809 ppb             | 13 cps            | 90.1 %        |
| 169Tm (KED) | 4.812 ppb             | 62 cps            | 56.3 %        |
| 174Yb (KED) | 5.468 ppb             | 29 cps            | 67.6 %        |
| 175Lu (KED) | 2.981 ppb             | 39 cps            | 90.0 %        |
| 205Tl (KED) | 16.291 ppb            | 206 cps           | 34.1 %        |
| 208Pb (KED) | 39.125 ppb            | 357 cps           | 38.9 %        |
| 209Bi (KED) | 0.010 %               | 387 cps           | 93.8 %        |
| 232Th (KED) | 2.471 ppb             | 60 cps            | 70.9 %        |
| 238U (KED)  | 2.856 ppb             | 67 cps            | 48.2 %        |

# Comprehensive

9/30/2021 2:22:41 PM

## Sample Summary

Instrument ID: iCAP Q

Analysis index: 10

Analysis name: 033915(179178)jian

Analysis started at: 9/30/2021 11:57:44 AM

User name: WINDOWS-UPCI4ER\Administrator

| Category    | Concentration average | Concentration RSD |
|-------------|-----------------------|-------------------|
| 6Li (KED)   | 22.612 %              | 172.7 %           |
| 11B (KED)   | Infinity ppb          |                   |
| 24Mg (KED)  | Infinity ppb          |                   |
| 45Sc (KED)  | 22.817 %              | 173.1 %           |
| 51V (KED)   | Infinity ppb          |                   |
| 52Cr (KED)  | Infinity ppb          |                   |
| 55Mn (KED)  | Infinity ppb          |                   |
| 56Fe (KED)  | Infinity ppb          |                   |
| 58Ni (KED)  | Infinity ppb          |                   |
| 63Cu (KED)  | 152.789 ppb           | 116.2 %           |
| 64Zn (KED)  | 869.190 ppb           | 97.5 %            |
| 69Ga (KED)  | 58.294 ppb            | 139.7 %           |
| 75As (KED)  | 480.297 ppb           | 156.1 %           |
| 80Se (KED)  | 154,903.831 ppb       | 145.2 %           |
| 85Rb (KED)  | 0.602 ppb             | 174.8 %           |
| 88Sr (KED)  | 29.184 ppb            | 76.7 %            |
| 89Y (KED)   | 21.904 %              | 173.2 %           |
| 107Ag (KED) | 2.639 ppb             | 171.9 %           |
| 114Cd (KED) | 6.734 ppb             | 100.5 %           |
| 115In (KED) | 20.300 %              | 173.1 %           |
| 133Cs (KED) | 7.799 ppb             | 137.1 %           |
| 138Ba (KED) | 9.700 ppb             | 40.9 %            |
| 139La (KED) | 5.134 ppb             | 95.7 %            |
| 140Ce (KED) | 6.102 ppb             | 74.7 %            |
| 141Pr (KED) | 7.450 ppb             | 131.1 %           |
| 142Nd (KED) | 6.340 ppb             | 78.9 %            |
| 152Sm (KED) | 1.639 ppb             | 167.2 %           |
| 153Eu (KED) | 8.913 ppb             | 92.4 %            |
| 158Gd (KED) | 4.031 ppb             | 84.3 %            |
| 159Tb (KED) | 20.986 %              | 173.2 %           |
| 164Dy (KED) | 8.525 ppb             | 123.6 %           |
| 166Er (KED) | 10.293 ppb            | 132.5 %           |
| 169Tm (KED) | 5.345 ppb             | 88.9 %            |
| 174Yb (KED) | 3.824 ppb             | 94.1 %            |
| 175Lu (KED) | 4.116 ppb             | 86.4 %            |
| 205Tl (KED) | 11.480 ppb            | 98.0 %            |
| 208Pb (KED) | 38.556 ppb            | 105.1 %           |
| 209Bi (KED) | 20.377 %              | 173.2 %           |
| 232Th (KED) | 2.386 ppb             | 122.4 %           |
| 238U (KED)  | 3.047 ppb             | 96.5 %            |

| Category   | Concentration average | Intensity average | Intensity RSD |
|------------|-----------------------|-------------------|---------------|
| 6Li (KED)  | 22.612 %              | 552 cps           | 172.7 %       |
| 9Be (KED)  |                       | 2 cps             | 173.2 %       |
| 11B (KED)  | Infinity ppb          | 79 cps            | 147.6 %       |
| 24Mg (KED) | Infinity ppb          | 55,061 cps        | 173.1 %       |
| 27Al (KED) |                       | 19,812 cps        | 173.1 %       |
| 45Sc (KED) | 22.817 %              | 8,733 cps         | 173.1 %       |
| 51V (KED)  | Infinity ppb          | 2,233 cps         | 172.6 %       |
| 52Cr (KED) | Infinity ppb          | 6,439 cps         | 172.7 %       |

# Comprehensive

9/30/2021 2:22:41 PM

| Category    | Concentration average | Intensity average | Intensity RSD |
|-------------|-----------------------|-------------------|---------------|
| 55Mn (KED)  | Infinity ppb          | 24,082 cps        | 173.1 %       |
| 56Fe (KED)  | Infinity ppb          | 1,815,309 cps     | 173.2 %       |
| 58Ni (KED)  | Infinity ppb          | 10,528 cps        | 172.7 %       |
| 59Co (KED)  |                       | 1,579 cps         | 172.8 %       |
| 63Cu (KED)  | 152.789 ppb           | 24,139 cps        | 172.7 %       |
| 64Zn (KED)  | 869.190 ppb           | 118,936 cps       | 173.0 %       |
| 69Ga (KED)  | 58.294 ppb            | 1,856 cps         | 172.6 %       |
| 75As (KED)  | 480.297 ppb           | 164 cps           | 162.7 %       |
| 80Se (KED)  | 154,903.831 ppb       | 1,139 cps         | 6.8 %         |
| 85Rb (KED)  | 0.602 ppb             | 2,061 cps         | 173.2 %       |
| 88Sr (KED)  | 29.184 ppb            | 11,138 cps        | 173.1 %       |
| 89Y (KED)   | 21.904 %              | 85,317 cps        | 173.2 %       |
| 107Ag (KED) | 2.639 ppb             | 453 cps           | 163.1 %       |
| 114Cd (KED) | 6.734 ppb             | 190 cps           | 158.0 %       |
| 115In (KED) | 20.300 %              | 154,145 cps       | 173.1 %       |
| 133Cs (KED) | 7.799 ppb             | 892 cps           | 168.0 %       |
| 138Ba (KED) | 9.700 ppb             | 52,160 cps        | 173.2 %       |
| 139La (KED) | 5.134 ppb             | 10,791 cps        | 172.9 %       |
| 140Ce (KED) | 6.102 ppb             | 29,677 cps        | 173.0 %       |
| 141Pr (KED) | 7.450 ppb             | 3,891 cps         | 172.3 %       |
| 142Nd (KED) | 6.340 ppb             | 7,933 cps         | 172.9 %       |
| 152Sm (KED) | 1.639 ppb             | 1,067 cps         | 172.4 %       |
| 153Eu (KED) | 8.913 ppb             | 536 cps           | 164.1 %       |
| 158Gd (KED) | 4.031 ppb             | 1,357 cps         | 171.9 %       |
| 159Tb (KED) | 20.986 %              | 893,572 cps       | 173.2 %       |
| 164Dy (KED) | 8.525 ppb             | 1,196 cps         | 168.2 %       |
| 166Er (KED) | 10.293 ppb            | 836 cps           | 169.1 %       |
| 169Tm (KED) | 5.345 ppb             | 482 cps           | 153.0 %       |
| 174Yb (KED) | 3.824 ppb             | 731 cps           | 170.0 %       |
| 175Lu (KED) | 4.116 ppb             | 4,728 cps         | 172.1 %       |
| 205Tl (KED) | 11.480 ppb            | 755 cps           | 136.5 %       |
| 208Pb (KED) | 38.556 ppb            | 32,404 cps        | 171.3 %       |
| 209Bi (KED) | 20.377 %              | 793,652 cps       | 173.2 %       |
| 232Th (KED) | 2.386 ppb             | 15,431 cps        | 172.4 %       |
| 238U (KED)  | 3.047 ppb             | 4,539 cps         | 169.5 %       |

# Comprehensive

9/30/2021 2:22:41 PM

## Sample Summary

Instrument ID: iCAP Q

Analysis index: 11

Analysis name: 046214(179142)jian

Analysis started at: 9/30/2021 12:01:28 PM

User name: WINDOWS-UPCI4ER\Administrator

| Category    | Concentration average | Concentration RSD |
|-------------|-----------------------|-------------------|
| 6Li (KED)   | 0.819 %               | 159.0 %           |
| 11B (KED)   | Infinity ppb          |                   |
| 24Mg (KED)  | Infinity ppb          |                   |
| 27Al (KED)  | Infinity ppb          |                   |
| 45Sc (KED)  | 2.825 %               | 172.1 %           |
| 52Cr (KED)  | Infinity ppb          |                   |
| 55Mn (KED)  | Infinity ppb          |                   |
| 56Fe (KED)  | Infinity ppb          |                   |
| 58Ni (KED)  | Infinity ppb          |                   |
| 59Co (KED)  | Infinity ppb          |                   |
| 63Cu (KED)  | 18.306 ppb            | 56.1 %            |
| 64Zn (KED)  | 139.274 ppb           | 17.9 %            |
| 69Ga (KED)  | 4.747 ppb             | 70.4 %            |
| 75As (KED)  | 30.627 ppb            | 91.6 %            |
| 80Se (KED)  | 11,036.863 ppb        | 121.2 %           |
| 85Rb (KED)  | 6.076 ppb             | 43.0 %            |
| 88Sr (KED)  | 3.783 ppb             | 118.2 %           |
| 89Y (KED)   | 3.618 %               | 171.7 %           |
| 107Ag (KED) | 4.750 ppb             | 125.7 %           |
| 114Cd (KED) | 3.458 ppb             | 85.3 %            |
| 115In (KED) | 3.153 %               | 171.8 %           |
| 133Cs (KED) | 4.701 ppb             | 105.4 %           |
| 138Ba (KED) | 11.235 ppb            | 59.2 %            |
| 139La (KED) | 7.915 ppb             | 119.0 %           |
| 140Ce (KED) | 6.394 ppb             | 86.0 %            |
| 141Pr (KED) | 6.327 ppb             | 116.9 %           |
| 142Nd (KED) | 8.630 ppb             | 99.9 %            |
| 152Sm (KED) | 4.087 ppb             | 92.3 %            |
| 153Eu (KED) | 5.480 ppb             | 105.0 %           |
| 158Gd (KED) | 5.359 ppb             | 92.1 %            |
| 159Tb (KED) | 3.379 %               | 172.0 %           |
| 164Dy (KED) | 4.358 ppb             | 96.5 %            |
| 166Er (KED) | 2.813 ppb             | 85.1 %            |
| 169Tm (KED) | 3.825 ppb             | 90.2 %            |
| 174Yb (KED) | 3.306 ppb             | 90.3 %            |
| 175Lu (KED) | 2.595 ppb             | 95.0 %            |
| 205Tl (KED) | 8.704 ppb             | 104.0 %           |
| 208Pb (KED) | 21.917 ppb            | 117.1 %           |
| 209Bi (KED) | 2.978 %               | 172.1 %           |
| 232Th (KED) | 3.594 ppb             | 77.9 %            |
| 238U (KED)  | 3.256 ppb             | 85.0 %            |

| Category   | Concentration average | Intensity average | Intensity RSD |
|------------|-----------------------|-------------------|---------------|
| 6Li (KED)  | 0.819 %               | 20 cps            | 159.0 %       |
| 9Be (KED)  |                       | 0 cps             |               |
| 11B (KED)  | Infinity ppb          | 13 cps            | 152.1 %       |
| 24Mg (KED) | Infinity ppb          | 7,263 cps         | 172.5 %       |
| 27Al (KED) | Infinity ppb          | 2,207 cps         | 171.9 %       |
| 45Sc (KED) | 2.825 %               | 1,081 cps         | 172.1 %       |
| 51V (KED)  |                       | 277 cps           | 171.1 %       |

# Comprehensive

9/30/2021 2:22:41 PM

| Category    | Concentration average | Intensity average | Intensity RSD |
|-------------|-----------------------|-------------------|---------------|
| 52Cr (KED)  | Infinity ppb          | 1,004 cps         | 168.6 %       |
| 55Mn (KED)  | Infinity ppb          | 3,631 cps         | 172.0 %       |
| 56Fe (KED)  | Infinity ppb          | 311,603 cps       | 172.6 %       |
| 58Ni (KED)  | Infinity ppb          | 2,053 cps         | 170.3 %       |
| 59Co (KED)  | Infinity ppb          | 300 cps           | 163.6 %       |
| 63Cu (KED)  | 18.306 ppb            | 5,476 cps         | 170.5 %       |
| 64Zn (KED)  | 139.274 ppb           | 20,571 cps        | 171.9 %       |
| 69Ga (KED)  | 4.747 ppb             | 352 cps           | 169.1 %       |
| 75As (KED)  | 30.627 ppb            | 32 cps            | 93.9 %        |
| 80Se (KED)  | 11,036.863 ppb        | 1,292 cps         | 6.8 %         |
| 85Rb (KED)  | 6.076 ppb             | 610 cps           | 169.9 %       |
| 88Sr (KED)  | 3.783 ppb             | 2,379 cps         | 172.8 %       |
| 89Y (KED)   | 3.618 %               | 14,091 cps        | 171.7 %       |
| 107Ag (KED) | 4.750 ppb             | 317 cps           | 145.0 %       |
| 114Cd (KED) | 3.458 ppb             | 54 cps            | 106.5 %       |
| 115In (KED) | 3.153 %               | 23,943 cps        | 171.8 %       |
| 133Cs (KED) | 4.701 ppb             | 204 cps           | 142.2 %       |
| 138Ba (KED) | 11.235 ppb            | 10,933 cps        | 172.0 %       |
| 139La (KED) | 7.915 ppb             | 2,430 cps         | 165.6 %       |
| 140Ce (KED) | 6.394 ppb             | 6,152 cps         | 169.0 %       |
| 141Pr (KED) | 6.327 ppb             | 876 cps           | 145.5 %       |
| 142Nd (KED) | 8.630 ppb             | 1,748 cps         | 164.6 %       |
| 152Sm (KED) | 4.087 ppb             | 242 cps           | 138.3 %       |
| 153Eu (KED) | 5.480 ppb             | 202 cps           | 83.4 %        |
| 158Gd (KED) | 5.359 ppb             | 330 cps           | 127.6 %       |
| 159Tb (KED) | 3.379 %               | 143,856 cps       | 172.0 %       |
| 164Dy (KED) | 4.358 ppb             | 279 cps           | 125.2 %       |
| 166Er (KED) | 2.813 ppb             | 220 cps           | 110.1 %       |
| 169Tm (KED) | 3.825 ppb             | 353 cps           | 72.3 %        |
| 174Yb (KED) | 3.306 ppb             | 242 cps           | 107.5 %       |
| 175Lu (KED) | 2.595 ppb             | 866 cps           | 135.1 %       |
| 205Tl (KED) | 8.704 ppb             | 420 cps           | 53.0 %        |
| 208Pb (KED) | 21.917 ppb            | 7,327 cps         | 162.0 %       |
| 209Bi (KED) | 2.978 %               | 115,977 cps       | 172.1 %       |
| 232Th (KED) | 3.594 ppb             | 3,411 cps         | 158.9 %       |
| 238U (KED)  | 3.256 ppb             | 1,116 cps         | 126.0 %       |

# Comprehensive

9/30/2021 2:22:41 PM

## Sample Summary

Instrument ID: iCAP Q

Analysis index: 12

Analysis name: 179224jian

Analysis started at: 9/30/2021 12:09:14 PM

User name: WINDOWS-UPCI4ER\Administrator

| Category    | Concentration average | Concentration RSD |
|-------------|-----------------------|-------------------|
| 6Li (KED)   | 134.445 %             | 1.8 %             |
| 9Be (KED)   | 0.022 ppb             | 1.8 %             |
| 11B (KED)   | -15.189 ppb           | 1.5 %             |
| 24Mg (KED)  | 511.843 ppb           | 3.3 %             |
| 27Al (KED)  | 641.268 ppb           | 1.7 %             |
| 45Sc (KED)  | 125.745 %             | 1.3 %             |
| 51V (KED)   | 1.260 ppb             | 0.8 %             |
| 52Cr (KED)  | 2.586 ppb             | 2.4 %             |
| 55Mn (KED)  | 16.249 ppb            | 1.9 %             |
| 56Fe (KED)  | 699.005 ppb           | 1.5 %             |
| 58Ni (KED)  | 3.401 ppb             | 1.5 %             |
| 59Co (KED)  | 0.318 ppb             | 2.0 %             |
| 63Cu (KED)  | 6.993 ppb             | 2.4 %             |
| 64Zn (KED)  | 154.256 ppb           | 2.1 %             |
| 69Ga (KED)  | 1.540 ppb             | 1.2 %             |
| 75As (KED)  | 0.621 ppb             | 6.8 %             |
| 80Se (KED)  | -0.162 ppb            | 145.8 %           |
| 85Rb (KED)  | 2.463 ppb             | 0.5 %             |
| 88Sr (KED)  | 6.385 ppb             | 1.1 %             |
| 89Y (KED)   | 109.970 %             | 2.0 %             |
| 107Ag (KED) | 0.072 ppb             | 1.5 %             |
| 114Cd (KED) | 0.044 ppb             | 3.2 %             |
| 115In (KED) | 99.358 %              | 0.8 %             |
| 133Cs (KED) | 0.140 ppb             | 7.2 %             |
| 138Ba (KED) | 6.341 ppb             | 2.8 %             |
| 139La (KED) | 0.627 ppb             | 1.9 %             |
| 140Ce (KED) | 1.264 ppb             | 0.4 %             |
| 141Pr (KED) | 0.148 ppb             | 2.0 %             |
| 142Nd (KED) | 0.767 ppb             | 0.8 %             |
| 152Sm (KED) | 0.107 ppb             | 6.3 %             |
| 153Eu (KED) | 0.021 ppb             | 8.8 %             |
| 158Gd (KED) | 0.089 ppb             | 2.1 %             |
| 159Tb (KED) | 99.881 %              | 1.2 %             |
| 164Dy (KED) | 0.064 ppb             | 1.7 %             |
| 166Er (KED) | 0.032 ppb             | 4.0 %             |
| 169Tm (KED) | 0.004 ppb             | 5.7 %             |
| 174Yb (KED) | 0.026 ppb             | 5.0 %             |
| 175Lu (KED) | -0.008 ppb            | 9.8 %             |
| 205Tl (KED) | 0.015 ppb             | 1.7 %             |
| 208Pb (KED) | 0.951 ppb             | 2.5 %             |
| 209Bi (KED) | 83.548 %              | 0.4 %             |
| 232Th (KED) | 0.203 ppb             | 1.2 %             |
| 238U (KED)  | 0.050 ppb             | 0.5 %             |

| Category   | Concentration average | Intensity average | Intensity RSD |
|------------|-----------------------|-------------------|---------------|
| 6Li (KED)  | 134.445 %             | 3,284 cps         | 1.8 %         |
| 9Be (KED)  | 0.022 ppb             | 3 cps             | 0.0 %         |
| 11B (KED)  | -15.189 ppb           | 801 cps           | 3.8 %         |
| 24Mg (KED) | 511.843 ppb           | 301,350 cps       | 2.3 %         |
| 27Al (KED) | 641.268 ppb           | 92,676 cps        | 0.6 %         |

# Comprehensive

9/30/2021 2:22:41 PM

| Category    | Concentration average | Intensity average | Intensity RSD |
|-------------|-----------------------|-------------------|---------------|
| 45Sc (KED)  | 125.745 %             | 48,128 cps        | 1.3 %         |
| 51V (KED)   | 1.260 ppb             | 10,261 cps        | 2.1 %         |
| 52Cr (KED)  | 2.586 ppb             | 33,187 cps        | 2.0 %         |
| 55Mn (KED)  | 16.249 ppb            | 109,942 cps       | 1.5 %         |
| 56Fe (KED)  | 699.005 ppb           | 8,186,096 cps     | 0.6 %         |
| 58Ni (KED)  | 3.401 ppb             | 49,897 cps        | 1.3 %         |
| 59Co (KED)  | 0.318 ppb             | 7,864 cps         | 0.8 %         |
| 63Cu (KED)  | 6.993 ppb             | 111,863 cps       | 0.9 %         |
| 64Zn (KED)  | 154.256 ppb           | 663,001 cps       | 0.4 %         |
| 69Ga (KED)  | 1.540 ppb             | 8,798 cps         | 3.0 %         |
| 75As (KED)  | 0.621 ppb             | 807 cps           | 5.3 %         |
| 80Se (KED)  | -0.162 ppb            | 1,358 cps         | 7.2 %         |
| 85Rb (KED)  | 2.463 ppb             | 14,019 cps        | 2.0 %         |
| 88Sr (KED)  | 6.385 ppb             | 53,361 cps        | 0.9 %         |
| 89Y (KED)   | 109.970 %             | 428,328 cps       | 2.0 %         |
| 107Ag (KED) | 0.072 ppb             | 3,455 cps         | 1.9 %         |
| 114Cd (KED) | 0.044 ppb             | 839 cps           | 2.3 %         |
| 115In (KED) | 99.358 %              | 754,458 cps       | 0.8 %         |
| 133Cs (KED) | 0.140 ppb             | 4,014 cps         | 6.6 %         |
| 138Ba (KED) | 6.341 ppb             | 253,583 cps       | 2.0 %         |
| 139La (KED) | 0.627 ppb             | 50,684 cps        | 0.8 %         |
| 140Ce (KED) | 1.264 ppb             | 136,048 cps       | 0.9 %         |
| 141Pr (KED) | 0.148 ppb             | 17,027 cps        | 3.0 %         |
| 142Nd (KED) | 0.767 ppb             | 35,578 cps        | 0.9 %         |
| 152Sm (KED) | 0.107 ppb             | 4,679 cps         | 5.1 %         |
| 153Eu (KED) | 0.021 ppb             | 1,838 cps         | 7.8 %         |
| 158Gd (KED) | 0.089 ppb             | 5,281 cps         | 0.9 %         |
| 159Tb (KED) | 99.881 %              | 4,252,891 cps     | 1.2 %         |
| 164Dy (KED) | 0.064 ppb             | 4,439 cps         | 2.7 %         |
| 166Er (KED) | 0.032 ppb             | 2,926 cps         | 4.3 %         |
| 169Tm (KED) | 0.004 ppb             | 1,216 cps         | 4.6 %         |
| 174Yb (KED) | 0.026 ppb             | 2,598 cps         | 4.3 %         |
| 175Lu (KED) | -0.008 ppb            | 19,358 cps        | 1.5 %         |
| 205Tl (KED) | 0.015 ppb             | 2,580 cps         | 1.9 %         |
| 208Pb (KED) | 0.951 ppb             | 145,282 cps       | 1.7 %         |
| 209Bi (KED) | 83.548 %              | 3,254,116 cps     | 0.4 %         |
| 232Th (KED) | 0.203 ppb             | 52,320 cps        | 1.4 %         |
| 238U (KED)  | 0.050 ppb             | 15,377 cps        | 0.7 %         |

# Comprehensive

9/30/2021 2:22:41 PM

## Sample Summary

Instrument ID: iCAP Q

Analysis index: 13

Analysis name: 047600(178548)jian

Analysis started at: 9/30/2021 12:14:46 PM

User name: WINDOWS-UPCI4ER\Administrator

| Category    | Concentration average | Concentration RSD |
|-------------|-----------------------|-------------------|
| 6Li (KED)   | 132.670 %             | 4.6 %             |
| 9Be (KED)   | 0.043 ppb             | 98.0 %            |
| 11B (KED)   | -12.357 ppb           | 5.6 %             |
| 24Mg (KED)  | 627.087 ppb           | 4.2 %             |
| 27Al (KED)  | 914.142 ppb           | 2.0 %             |
| 45Sc (KED)  | 127.077 %             | 0.4 %             |
| 51V (KED)   | 1.542 ppb             | 1.4 %             |
| 52Cr (KED)  | 4.122 ppb             | 1.2 %             |
| 55Mn (KED)  | 20.188 ppb            | 0.6 %             |
| 56Fe (KED)  | 931.587 ppb           | 0.3 %             |
| 58Ni (KED)  | 4.661 ppb             | 1.3 %             |
| 59Co (KED)  | 0.379 ppb             | 2.6 %             |
| 63Cu (KED)  | 11.258 ppb            | 1.7 %             |
| 64Zn (KED)  | 155.947 ppb           | 1.3 %             |
| 69Ga (KED)  | 1.870 ppb             | 2.7 %             |
| 75As (KED)  | 0.546 ppb             | 1.8 %             |
| 80Se (KED)  | -0.369 ppb            | 28.3 %            |
| 85Rb (KED)  | 2.189 ppb             | 3.5 %             |
| 88Sr (KED)  | 11.492 ppb            | 0.5 %             |
| 89Y (KED)   | 109.788 %             | 0.9 %             |
| 107Ag (KED) | 0.033 ppb             | 1.9 %             |
| 114Cd (KED) | 0.037 ppb             | 6.0 %             |
| 115In (KED) | 100.356 %             | 1.4 %             |
| 133Cs (KED) | 0.172 ppb             | 0.4 %             |
| 138Ba (KED) | 7.220 ppb             | 1.1 %             |
| 139La (KED) | 0.716 ppb             | 1.5 %             |
| 140Ce (KED) | 1.502 ppb             | 2.0 %             |
| 141Pr (KED) | 0.180 ppb             | 2.6 %             |
| 142Nd (KED) | 0.962 ppb             | 1.9 %             |
| 152Sm (KED) | 0.128 ppb             | 0.5 %             |
| 153Eu (KED) | 0.026 ppb             | 3.0 %             |
| 158Gd (KED) | 0.118 ppb             | 3.5 %             |
| 159Tb (KED) | 101.772 %             | 0.8 %             |
| 164Dy (KED) | 0.081 ppb             | 3.4 %             |
| 166Er (KED) | 0.039 ppb             | 5.7 %             |
| 169Tm (KED) | 0.005 ppb             | 3.6 %             |
| 174Yb (KED) | 0.030 ppb             | 2.7 %             |
| 175Lu (KED) | -0.009 ppb            | 4.7 %             |
| 205Tl (KED) | 0.015 ppb             | 0.4 %             |
| 208Pb (KED) | 0.981 ppb             | 1.7 %             |
| 209Bi (KED) | 82.716 %              | 0.4 %             |
| 232Th (KED) | 0.288 ppb             | 2.7 %             |
| 238U (KED)  | 0.070 ppb             | 2.8 %             |

| Category   | Concentration average | Intensity average | Intensity RSD |
|------------|-----------------------|-------------------|---------------|
| 6Li (KED)  | 132.670 %             | 3,240 cps         | 4.6 %         |
| 9Be (KED)  | 0.043 ppb             | 7 cps             | 100.0 %       |
| 11B (KED)  | -12.357 ppb           | 1,021 cps         | 2.7 %         |
| 24Mg (KED) | 627.087 ppb           | 363,800 cps       | 0.7 %         |
| 27Al (KED) | 914.142 ppb           | 133,444 cps       | 1.7 %         |

# Comprehensive

9/30/2021 2:22:41 PM

| Category    | Concentration average | Intensity average | Intensity RSD |
|-------------|-----------------------|-------------------|---------------|
| 45Sc (KED)  | 127.077 %             | 48,638 cps        | 0.4 %         |
| 51V (KED)   | 1.542 ppb             | 12,682 cps        | 1.7 %         |
| 52Cr (KED)  | 4.122 ppb             | 53,319 cps        | 1.3 %         |
| 55Mn (KED)  | 20.188 ppb            | 137,920 cps       | 1.0 %         |
| 56Fe (KED)  | 931.587 ppb           | 11,023,581 cps    | 0.1 %         |
| 58Ni (KED)  | 4.661 ppb             | 68,901 cps        | 1.7 %         |
| 59Co (KED)  | 0.379 ppb             | 9,477 cps         | 2.9 %         |
| 63Cu (KED)  | 11.258 ppb            | 179,307 cps       | 0.8 %         |
| 64Zn (KED)  | 155.947 ppb           | 669,296 cps       | 1.3 %         |
| 69Ga (KED)  | 1.870 ppb             | 10,638 cps        | 2.0 %         |
| 75As (KED)  | 0.546 ppb             | 711 cps           | 1.8 %         |
| 80Se (KED)  | -0.369 ppb            | 1,277 cps         | 2.8 %         |
| 85Rb (KED)  | 2.189 ppb             | 12,437 cps        | 2.6 %         |
| 88Sr (KED)  | 11.492 ppb            | 95,686 cps        | 0.8 %         |
| 89Y (KED)   | 109.788 %             | 427,621 cps       | 0.9 %         |
| 107Ag (KED) | 0.033 ppb             | 1,688 cps         | 1.1 %         |
| 114Cd (KED) | 0.037 ppb             | 716 cps           | 6.7 %         |
| 115In (KED) | 100.356 %             | 762,034 cps       | 1.4 %         |
| 133Cs (KED) | 0.172 ppb             | 4,975 cps         | 1.2 %         |
| 138Ba (KED) | 7.220 ppb             | 293,934 cps       | 1.0 %         |
| 139La (KED) | 0.716 ppb             | 58,981 cps        | 1.3 %         |
| 140Ce (KED) | 1.502 ppb             | 164,641 cps       | 1.3 %         |
| 141Pr (KED) | 0.180 ppb             | 21,137 cps        | 1.9 %         |
| 142Nd (KED) | 0.962 ppb             | 45,430 cps        | 1.6 %         |
| 152Sm (KED) | 0.128 ppb             | 5,724 cps         | 0.8 %         |
| 153Eu (KED) | 0.026 ppb             | 2,375 cps         | 2.8 %         |
| 158Gd (KED) | 0.118 ppb             | 7,061 cps         | 2.7 %         |
| 159Tb (KED) | 101.772 %             | 4,333,412 cps     | 0.8 %         |
| 164Dy (KED) | 0.081 ppb             | 5,722 cps         | 3.7 %         |
| 166Er (KED) | 0.039 ppb             | 3,579 cps         | 5.9 %         |
| 169Tm (KED) | 0.005 ppb             | 1,505 cps         | 3.8 %         |
| 174Yb (KED) | 0.030 ppb             | 3,055 cps         | 3.3 %         |
| 175Lu (KED) | -0.009 ppb            | 19,435 cps        | 0.5 %         |
| 205Tl (KED) | 0.015 ppb             | 2,455 cps         | 0.2 %         |
| 208Pb (KED) | 0.981 ppb             | 147,282 cps       | 1.1 %         |
| 209Bi (KED) | 82.716 %              | 3,221,683 cps     | 0.4 %         |
| 232Th (KED) | 0.288 ppb             | 72,435 cps        | 2.5 %         |
| 238U (KED)  | 0.070 ppb             | 20,619 cps        | 2.6 %         |

# Comprehensive

9/30/2021 2:22:41 PM

## Sample Summary

Instrument ID: iCAP Q

Analysis index: 14

Analysis name: 179410jian

Analysis started at: 9/30/2021 12:19:07 PM

User name: WINDOWS-UPCI4ER\Administrator

| Category    | Concentration average | Concentration RSD |
|-------------|-----------------------|-------------------|
| 6Li (KED)   | 130.668 %             | 2.8 %             |
| 9Be (KED)   | 0.037 ppb             | 123.0 %           |
| 11B (KED)   | -17.325 ppb           | 3.9 %             |
| 24Mg (KED)  | 973.120 ppb           | 3.1 %             |
| 27Al (KED)  | 1,241.841 ppb         | 3.2 %             |
| 45Sc (KED)  | 129.768 %             | 0.4 %             |
| 51V (KED)   | 2.197 ppb             | 1.6 %             |
| 52Cr (KED)  | 3.545 ppb             | 2.2 %             |
| 55Mn (KED)  | 28.338 ppb            | 0.7 %             |
| 56Fe (KED)  | 1,336.015 ppb         | 1.0 %             |
| 58Ni (KED)  | 6.492 ppb             | 1.6 %             |
| 59Co (KED)  | 0.569 ppb             | 2.1 %             |
| 63Cu (KED)  | 9.043 ppb             | 1.1 %             |
| 64Zn (KED)  | 150.213 ppb           | 0.2 %             |
| 69Ga (KED)  | 2.529 ppb             | 1.8 %             |
| 75As (KED)  | 0.728 ppb             | 3.6 %             |
| 80Se (KED)  | -0.279 ppb            | 39.5 %            |
| 85Rb (KED)  | 4.224 ppb             | 1.3 %             |
| 88Sr (KED)  | 13.289 ppb            | 1.2 %             |
| 89Y (KED)   | 112.040 %             | 0.6 %             |
| 107Ag (KED) | 0.051 ppb             | 3.5 %             |
| 114Cd (KED) | 0.074 ppb             | 9.3 %             |
| 115In (KED) | 98.115 %              | 1.4 %             |
| 133Cs (KED) | 0.261 ppb             | 1.1 %             |
| 138Ba (KED) | 10.176 ppb            | 2.3 %             |
| 139La (KED) | 1.161 ppb             | 3.0 %             |
| 140Ce (KED) | 2.449 ppb             | 3.4 %             |
| 141Pr (KED) | 0.274 ppb             | 3.3 %             |
| 142Nd (KED) | 1.506 ppb             | 2.3 %             |
| 152Sm (KED) | 0.210 ppb             | 3.9 %             |
| 153Eu (KED) | 0.040 ppb             | 4.6 %             |
| 158Gd (KED) | 0.178 ppb             | 4.6 %             |
| 159Tb (KED) | 96.266 %              | 1.6 %             |
| 164Dy (KED) | 0.124 ppb             | 5.0 %             |
| 166Er (KED) | 0.063 ppb             | 2.2 %             |
| 169Tm (KED) | 0.008 ppb             | 7.3 %             |
| 174Yb (KED) | 0.046 ppb             | 5.6 %             |
| 175Lu (KED) | -0.004 ppb            | 115.4 %           |
| 205Tl (KED) | 0.020 ppb             | 4.7 %             |
| 208Pb (KED) | 1.613 ppb             | 2.5 %             |
| 209Bi (KED) | 80.376 %              | 1.5 %             |
| 232Th (KED) | 0.432 ppb             | 2.3 %             |
| 238U (KED)  | 0.101 ppb             | 2.1 %             |

| Category   | Concentration average | Intensity average | Intensity RSD |
|------------|-----------------------|-------------------|---------------|
| 6Li (KED)  | 130.668 %             | 3,192 cps         | 2.8 %         |
| 9Be (KED)  | 0.037 ppb             | 6 cps             | 124.9 %       |
| 11B (KED)  | -17.325 ppb           | 607 cps           | 11.4 %        |
| 24Mg (KED) | 973.120 ppb           | 555,985 cps       | 0.6 %         |
| 27Al (KED) | 1,241.841 ppb         | 185,048 cps       | 3.0 %         |

# Comprehensive

9/30/2021 2:22:41 PM

| Category    | Concentration average | Intensity average | Intensity RSD |
|-------------|-----------------------|-------------------|---------------|
| 45Sc (KED)  | 129.768 %             | 49,668 cps        | 0.4 %         |
| 51V (KED)   | 2.197 ppb             | 18,440 cps        | 1.3 %         |
| 52Cr (KED)  | 3.545 ppb             | 46,866 cps        | 1.8 %         |
| 55Mn (KED)  | 28.338 ppb            | 197,446 cps       | 0.3 %         |
| 56Fe (KED)  | 1,336.015 ppb         | 16,139,637 cps    | 0.8 %         |
| 58Ni (KED)  | 6.492 ppb             | 97,767 cps        | 1.2 %         |
| 59Co (KED)  | 0.569 ppb             | 14,492 cps        | 2.5 %         |
| 63Cu (KED)  | 9.043 ppb             | 147,168 cps       | 1.4 %         |
| 64Zn (KED)  | 150.213 ppb           | 658,004 cps       | 0.4 %         |
| 69Ga (KED)  | 2.529 ppb             | 14,652 cps        | 1.2 %         |
| 75As (KED)  | 0.728 ppb             | 962 cps           | 4.0 %         |
| 80Se (KED)  | -0.279 ppb            | 1,338 cps         | 3.6 %         |
| 85Rb (KED)  | 4.224 ppb             | 24,467 cps        | 1.3 %         |
| 88Sr (KED)  | 13.289 ppb            | 112,873 cps       | 0.7 %         |
| 89Y (KED)   | 112.040 %             | 436,393 cps       | 0.6 %         |
| 107Ag (KED) | 0.051 ppb             | 2,455 cps         | 2.6 %         |
| 114Cd (KED) | 0.074 ppb             | 1,337 cps         | 8.2 %         |
| 115In (KED) | 98.115 %              | 745,016 cps       | 1.4 %         |
| 133Cs (KED) | 0.261 ppb             | 7,357 cps         | 1.3 %         |
| 138Ba (KED) | 10.176 ppb            | 390,872 cps       | 1.0 %         |
| 139La (KED) | 1.161 ppb             | 90,290 cps        | 2.1 %         |
| 140Ce (KED) | 2.449 ppb             | 253,600 cps       | 1.9 %         |
| 141Pr (KED) | 0.274 ppb             | 30,318 cps        | 2.0 %         |
| 142Nd (KED) | 1.506 ppb             | 67,236 cps        | 1.3 %         |
| 152Sm (KED) | 0.210 ppb             | 8,855 cps         | 2.6 %         |
| 153Eu (KED) | 0.040 ppb             | 3,407 cps         | 3.3 %         |
| 158Gd (KED) | 0.178 ppb             | 10,097 cps        | 3.2 %         |
| 159Tb (KED) | 96.266 %              | 4,098,977 cps     | 1.6 %         |
| 164Dy (KED) | 0.124 ppb             | 8,258 cps         | 3.4 %         |
| 166Er (KED) | 0.063 ppb             | 5,289 cps         | 2.3 %         |
| 169Tm (KED) | 0.008 ppb             | 2,144 cps         | 5.4 %         |
| 174Yb (KED) | 0.046 ppb             | 4,472 cps         | 4.8 %         |
| 175Lu (KED) | -0.004 ppb            | 19,228 cps        | 2.8 %         |
| 205Tl (KED) | 0.020 ppb             | 3,276 cps         | 6.1 %         |
| 208Pb (KED) | 1.613 ppb             | 213,519 cps       | 1.2 %         |
| 209Bi (KED) | 80.376 %              | 3,130,536 cps     | 1.5 %         |
| 232Th (KED) | 0.432 ppb             | 104,243 cps       | 2.0 %         |
| 238U (KED)  | 0.101 ppb             | 28,567 cps        | 3.4 %         |

# Comprehensive

9/30/2021 2:22:41 PM

## Sample Summary

Instrument ID: iCAP Q

Analysis index: 15

Analysis name: 047668(178626)jian

Analysis started at: 9/30/2021 12:23:24 PM

User name: WINDOWS-UPCI4ER\Administrator

| Category    | Concentration average | Concentration RSD |
|-------------|-----------------------|-------------------|
| 6Li (KED)   | 130.941 %             | 2.1 %             |
| 9Be (KED)   | 0.038 ppb             | 91.9 %            |
| 11B (KED)   | -13.675 ppb           | 2.6 %             |
| 24Mg (KED)  | 1,369.879 ppb         | 2.4 %             |
| 27Al (KED)  | 1,635.027 ppb         | 1.6 %             |
| 45Sc (KED)  | 130.668 %             | 1.6 %             |
| 51V (KED)   | 3.019 ppb             | 1.9 %             |
| 52Cr (KED)  | 4.929 ppb             | 1.4 %             |
| 55Mn (KED)  | 41.469 ppb            | 2.3 %             |
| 56Fe (KED)  | 1,889.640 ppb         | 1.4 %             |
| 58Ni (KED)  | 8.623 ppb             | 2.0 %             |
| 59Co (KED)  | 0.815 ppb             | 2.1 %             |
| 63Cu (KED)  | 13.741 ppb            | 1.3 %             |
| 64Zn (KED)  | 146.551 ppb           | 1.2 %             |
| 69Ga (KED)  | 3.428 ppb             | 2.3 %             |
| 75As (KED)  | 1.012 ppb             | 8.1 %             |
| 80Se (KED)  | -0.086 ppb            | 215.3 %           |
| 85Rb (KED)  | 4.229 ppb             | 1.6 %             |
| 88Sr (KED)  | 19.240 ppb            | 2.3 %             |
| 89Y (KED)   | 113.518 %             | 1.0 %             |
| 107Ag (KED) | 0.100 ppb             | 2.3 %             |
| 114Cd (KED) | 0.066 ppb             | 1.1 %             |
| 115In (KED) | 98.152 %              | 1.5 %             |
| 133Cs (KED) | 0.340 ppb             | 5.2 %             |
| 138Ba (KED) | 13.620 ppb            | 1.3 %             |
| 139La (KED) | 1.758 ppb             | 1.0 %             |
| 140Ce (KED) | 3.554 ppb             | 0.9 %             |
| 141Pr (KED) | 0.418 ppb             | 0.5 %             |
| 142Nd (KED) | 2.188 ppb             | 3.3 %             |
| 152Sm (KED) | 0.305 ppb             | 1.0 %             |
| 153Eu (KED) | 0.058 ppb             | 4.5 %             |
| 158Gd (KED) | 0.266 ppb             | 2.6 %             |
| 159Tb (KED) | 95.789 %              | 0.8 %             |
| 164Dy (KED) | 0.179 ppb             | 1.8 %             |
| 166Er (KED) | 0.086 ppb             | 1.1 %             |
| 169Tm (KED) | 0.011 ppb             | 4.4 %             |
| 174Yb (KED) | 0.065 ppb             | 2.5 %             |
| 175Lu (KED) | -0.003 ppb            | 52.6 %            |
| 205Tl (KED) | 0.024 ppb             | 1.9 %             |
| 208Pb (KED) | 1.904 ppb             | 2.9 %             |
| 209Bi (KED) | 78.409 %              | 0.3 %             |
| 232Th (KED) | 0.640 ppb             | 1.2 %             |
| 238U (KED)  | 0.139 ppb             | 2.1 %             |

| Category   | Concentration average | Intensity average | Intensity RSD |
|------------|-----------------------|-------------------|---------------|
| 6Li (KED)  | 130.941 %             | 3,198 cps         | 2.1 %         |
| 9Be (KED)  | 0.038 ppb             | 6 cps             | 91.7 %        |
| 11B (KED)  | -13.675 ppb           | 902 cps           | 1.2 %         |
| 24Mg (KED) | 1,369.879 ppb         | 784,183 cps       | 0.3 %         |
| 27Al (KED) | 1,635.027 ppb         | 245,248 cps       | 1.2 %         |

# Comprehensive

9/30/2021 2:22:41 PM

| Category    | Concentration average | Intensity average | Intensity RSD |
|-------------|-----------------------|-------------------|---------------|
| 45Sc (KED)  | 130.668 %             | 50,012 cps        | 1.6 %         |
| 51V (KED)   | 3.019 ppb             | 25,494 cps        | 0.4 %         |
| 52Cr (KED)  | 4.929 ppb             | 65,515 cps        | 1.7 %         |
| 55Mn (KED)  | 41.469 ppb            | 290,605 cps       | 0.9 %         |
| 56Fe (KED)  | 1,889.640 ppb         | 22,978,960 cps    | 0.1 %         |
| 58Ni (KED)  | 8.623 ppb             | 130,560 cps       | 0.6 %         |
| 59Co (KED)  | 0.815 ppb             | 20,836 cps        | 1.3 %         |
| 63Cu (KED)  | 13.741 ppb            | 226,095 cps       | 1.1 %         |
| 64Zn (KED)  | 146.551 ppb           | 650,441 cps       | 0.7 %         |
| 69Ga (KED)  | 3.428 ppb             | 20,087 cps        | 2.2 %         |
| 75As (KED)  | 1.012 ppb             | 1,348 cps         | 8.5 %         |
| 80Se (KED)  | -0.086 ppb            | 1,431 cps         | 4.1 %         |
| 85Rb (KED)  | 4.229 ppb             | 24,815 cps        | 0.6 %         |
| 88Sr (KED)  | 19.240 ppb            | 165,451 cps       | 2.2 %         |
| 89Y (KED)   | 113.518 %             | 442,149 cps       | 1.0 %         |
| 107Ag (KED) | 0.100 ppb             | 4,684 cps         | 0.8 %         |
| 114Cd (KED) | 0.066 ppb             | 1,211 cps         | 2.0 %         |
| 115In (KED) | 98.152 %              | 745,299 cps       | 1.5 %         |
| 133Cs (KED) | 0.340 ppb             | 9,574 cps         | 5.2 %         |
| 138Ba (KED) | 13.620 ppb            | 519,903 cps       | 1.3 %         |
| 139La (KED) | 1.758 ppb             | 136,039 cps       | 1.4 %         |
| 140Ce (KED) | 3.554 ppb             | 366,063 cps       | 0.1 %         |
| 141Pr (KED) | 0.418 ppb             | 45,985 cps        | 0.5 %         |
| 142Nd (KED) | 2.188 ppb             | 97,130 cps        | 2.5 %         |
| 152Sm (KED) | 0.305 ppb             | 12,778 cps        | 0.4 %         |
| 153Eu (KED) | 0.058 ppb             | 4,882 cps         | 3.8 %         |
| 158Gd (KED) | 0.266 ppb             | 14,987 cps        | 3.2 %         |
| 159Tb (KED) | 95.789 %              | 4,078,633 cps     | 0.8 %         |
| 164Dy (KED) | 0.179 ppb             | 11,794 cps        | 2.6 %         |
| 166Er (KED) | 0.086 ppb             | 7,119 cps         | 1.7 %         |
| 169Tm (KED) | 0.011 ppb             | 3,014 cps         | 4.2 %         |
| 174Yb (KED) | 0.065 ppb             | 6,189 cps         | 2.1 %         |
| 175Lu (KED) | -0.003 ppb            | 19,372 cps        | 1.5 %         |
| 205Tl (KED) | 0.024 ppb             | 3,872 cps         | 2.1 %         |
| 208Pb (KED) | 1.904 ppb             | 239,977 cps       | 2.7 %         |
| 209Bi (KED) | 78.409 %              | 3,053,954 cps     | 0.3 %         |
| 232Th (KED) | 0.640 ppb             | 149,668 cps       | 0.9 %         |
| 238U (KED)  | 0.139 ppb             | 37,855 cps        | 2.1 %         |

# Comprehensive

9/30/2021 2:22:41 PM

## Sample Summary

Instrument ID: iCAP Q

Analysis index: 16

Analysis name: 026367(179413)jian

Analysis started at: 9/30/2021 12:27:47 PM

User name: WINDOWS-UPCI4ER\Administrator

| Category    | Concentration average | Concentration RSD |
|-------------|-----------------------|-------------------|
| 6Li (KED)   | 128.711 %             | 2.8 %             |
| 9Be (KED)   | 0.077 ppb             | 17.9 %            |
| 11B (KED)   | -16.291 ppb           | 7.4 %             |
| 24Mg (KED)  | 785.273 ppb           | 2.6 %             |
| 27Al (KED)  | 767.984 ppb           | 1.1 %             |
| 45Sc (KED)  | 131.668 %             | 1.6 %             |
| 51V (KED)   | 1.362 ppb             | 1.2 %             |
| 52Cr (KED)  | 3.161 ppb             | 0.6 %             |
| 55Mn (KED)  | 22.006 ppb            | 1.8 %             |
| 56Fe (KED)  | 981.246 ppb           | 2.5 %             |
| 58Ni (KED)  | 5.227 ppb             | 3.3 %             |
| 59Co (KED)  | 0.398 ppb             | 3.8 %             |
| 63Cu (KED)  | 13.904 ppb            | 1.9 %             |
| 64Zn (KED)  | 152.296 ppb           | 0.9 %             |
| 69Ga (KED)  | 1.781 ppb             | 2.3 %             |
| 75As (KED)  | 0.528 ppb             | 6.7 %             |
| 80Se (KED)  | -0.238 ppb            | 47.4 %            |
| 85Rb (KED)  | 2.956 ppb             | 4.1 %             |
| 88Sr (KED)  | 11.224 ppb            | 2.7 %             |
| 89Y (KED)   | 112.199 %             | 0.8 %             |
| 107Ag (KED) | 0.074 ppb             | 7.0 %             |
| 114Cd (KED) | 0.053 ppb             | 6.4 %             |
| 115In (KED) | 99.745 %              | 1.1 %             |
| 133Cs (KED) | 0.157 ppb             | 5.5 %             |
| 138Ba (KED) | 7.199 ppb             | 3.6 %             |
| 139La (KED) | 0.693 ppb             | 1.7 %             |
| 140Ce (KED) | 1.460 ppb             | 2.0 %             |
| 141Pr (KED) | 0.165 ppb             | 3.0 %             |
| 142Nd (KED) | 0.872 ppb             | 4.0 %             |
| 152Sm (KED) | 0.124 ppb             | 2.9 %             |
| 153Eu (KED) | 0.024 ppb             | 6.4 %             |
| 158Gd (KED) | 0.105 ppb             | 1.6 %             |
| 159Tb (KED) | 96.906 %              | 2.1 %             |
| 164Dy (KED) | 0.072 ppb             | 4.6 %             |
| 166Er (KED) | 0.036 ppb             | 5.3 %             |
| 169Tm (KED) | 0.004 ppb             | 4.4 %             |
| 174Yb (KED) | 0.027 ppb             | 6.2 %             |
| 175Lu (KED) | -0.010 ppb            | 38.7 %            |
| 205Tl (KED) | 0.016 ppb             | 1.3 %             |
| 208Pb (KED) | 1.143 ppb             | 2.2 %             |
| 209Bi (KED) | 80.960 %              | 0.3 %             |
| 232Th (KED) | 0.247 ppb             | 0.9 %             |
| 238U (KED)  | 0.068 ppb             | 1.3 %             |

| Category   | Concentration average | Intensity average | Intensity RSD |
|------------|-----------------------|-------------------|---------------|
| 6Li (KED)  | 128.711 %             | 3,144 cps         | 2.8 %         |
| 9Be (KED)  | 0.077 ppb             | 11 cps            | 17.3 %        |
| 11B (KED)  | -16.291 ppb           | 678 cps           | 12.1 %        |
| 24Mg (KED) | 785.273 ppb           | 442,140 cps       | 0.9 %         |
| 27Al (KED) | 767.984 ppb           | 116,182 cps       | 0.6 %         |

# Comprehensive

9/30/2021 2:22:41 PM

| Category    | Concentration average | Intensity average | Intensity RSD |
|-------------|-----------------------|-------------------|---------------|
| 45Sc (KED)  | 131.668 %             | 50,395 cps        | 1.6 %         |
| 51V (KED)   | 1.362 ppb             | 11,608 cps        | 0.7 %         |
| 52Cr (KED)  | 3.161 ppb             | 42,423 cps        | 1.3 %         |
| 55Mn (KED)  | 22.006 ppb            | 155,683 cps       | 0.2 %         |
| 56Fe (KED)  | 981.246 ppb           | 12,027,138 cps    | 1.0 %         |
| 58Ni (KED)  | 5.227 ppb             | 79,970 cps        | 2.6 %         |
| 59Co (KED)  | 0.398 ppb             | 10,290 cps        | 2.2 %         |
| 63Cu (KED)  | 13.904 ppb            | 226,095 cps       | 1.1 %         |
| 64Zn (KED)  | 152.296 ppb           | 668,022 cps       | 0.4 %         |
| 69Ga (KED)  | 1.781 ppb             | 10,360 cps        | 1.6 %         |
| 75As (KED)  | 0.528 ppb             | 703 cps           | 5.7 %         |
| 80Se (KED)  | -0.238 ppb            | 1,356 cps         | 2.5 %         |
| 85Rb (KED)  | 2.956 ppb             | 17,154 cps        | 3.3 %         |
| 88Sr (KED)  | 11.224 ppb            | 95,503 cps        | 2.1 %         |
| 89Y (KED)   | 112.199 %             | 437,011 cps       | 0.8 %         |
| 107Ag (KED) | 0.074 ppb             | 3,546 cps         | 5.8 %         |
| 114Cd (KED) | 0.053 ppb             | 997 cps           | 6.2 %         |
| 115In (KED) | 99.745 %              | 757,394 cps       | 1.1 %         |
| 133Cs (KED) | 0.157 ppb             | 4,529 cps         | 4.5 %         |
| 138Ba (KED) | 7.199 ppb             | 278,948 cps       | 1.5 %         |
| 139La (KED) | 0.693 ppb             | 54,363 cps        | 0.4 %         |
| 140Ce (KED) | 1.460 ppb             | 152,384 cps       | 1.2 %         |
| 141Pr (KED) | 0.165 ppb             | 18,467 cps        | 1.3 %         |
| 142Nd (KED) | 0.872 ppb             | 39,210 cps        | 2.1 %         |
| 152Sm (KED) | 0.124 ppb             | 5,253 cps         | 0.8 %         |
| 153Eu (KED) | 0.024 ppb             | 2,049 cps         | 7.0 %         |
| 158Gd (KED) | 0.105 ppb             | 5,986 cps         | 3.4 %         |
| 159Tb (KED) | 96.906 %              | 4,126,227 cps     | 2.1 %         |
| 164Dy (KED) | 0.072 ppb             | 4,814 cps         | 3.2 %         |
| 166Er (KED) | 0.036 ppb             | 3,178 cps         | 4.1 %         |
| 169Tm (KED) | 0.004 ppb             | 1,279 cps         | 2.0 %         |
| 174Yb (KED) | 0.027 ppb             | 2,633 cps         | 4.0 %         |
| 175Lu (KED) | -0.010 ppb            | 18,453 cps        | 1.2 %         |
| 205Tl (KED) | 0.016 ppb             | 2,574 cps         | 1.5 %         |
| 208Pb (KED) | 1.143 ppb             | 162,311 cps       | 1.5 %         |
| 209Bi (KED) | 80.960 %              | 3,153,287 cps     | 0.3 %         |
| 232Th (KED) | 0.247 ppb             | 61,022 cps        | 1.2 %         |
| 238U (KED)  | 0.068 ppb             | 19,710 cps        | 1.0 %         |

# Comprehensive

9/30/2021 2:22:41 PM

## Sample Summary

Instrument ID: iCAP Q

Analysis index: 17

Analysis name: 028529(178579)jian

Analysis started at: 9/30/2021 12:32:59 PM

User name: WINDOWS-UPCI4ER\Administrator

| Category    | Concentration average | Concentration RSD |
|-------------|-----------------------|-------------------|
| 6Li (KED)   | 136.720 %             | 7.6 %             |
| 9Be (KED)   | 0.056 ppb             | 87.0 %            |
| 11B (KED)   | -10.635 ppb           | 26.0 %            |
| 24Mg (KED)  | 1,295.595 ppb         | 6.1 %             |
| 27Al (KED)  | 1,812.649 ppb         | 1.4 %             |
| 45Sc (KED)  | 131.120 %             | 1.5 %             |
| 51V (KED)   | 3.153 ppb             | 2.0 %             |
| 52Cr (KED)  | 4.599 ppb             | 1.9 %             |
| 55Mn (KED)  | 42.681 ppb            | 1.0 %             |
| 56Fe (KED)  | 1,944.798 ppb         | 2.9 %             |
| 58Ni (KED)  | 8.496 ppb             | 2.0 %             |
| 59Co (KED)  | 0.835 ppb             | 2.2 %             |
| 63Cu (KED)  | 10.641 ppb            | 1.0 %             |
| 64Zn (KED)  | 142.207 ppb           | 1.1 %             |
| 69Ga (KED)  | 3.428 ppb             | 1.0 %             |
| 75As (KED)  | 1.052 ppb             | 4.5 %             |
| 80Se (KED)  | 0.279 ppb             | 58.5 %            |
| 85Rb (KED)  | 4.239 ppb             | 1.1 %             |
| 88Sr (KED)  | 20.673 ppb            | 1.8 %             |
| 89Y (KED)   | 115.939 %             | 0.6 %             |
| 107Ag (KED) | 0.106 ppb             | 2.9 %             |
| 114Cd (KED) | 0.079 ppb             | 2.4 %             |
| 115In (KED) | 98.170 %              | 0.8 %             |
| 133Cs (KED) | 0.356 ppb             | 0.7 %             |
| 138Ba (KED) | 13.475 ppb            | 2.9 %             |
| 139La (KED) | 1.690 ppb             | 2.0 %             |
| 140Ce (KED) | 3.573 ppb             | 3.7 %             |
| 141Pr (KED) | 0.416 ppb             | 1.4 %             |
| 142Nd (KED) | 2.187 ppb             | 3.3 %             |
| 152Sm (KED) | 0.304 ppb             | 0.7 %             |
| 153Eu (KED) | 0.058 ppb             | 3.3 %             |
| 158Gd (KED) | 0.263 ppb             | 2.0 %             |
| 159Tb (KED) | 94.565 %              | 1.3 %             |
| 164Dy (KED) | 0.181 ppb             | 1.2 %             |
| 166Er (KED) | 0.085 ppb             | 3.0 %             |
| 169Tm (KED) | 0.011 ppb             | 5.3 %             |
| 174Yb (KED) | 0.067 ppb             | 5.9 %             |
| 175Lu (KED) | -0.001 ppb            | 32.7 %            |
| 205Tl (KED) | 0.023 ppb             | 7.7 %             |
| 208Pb (KED) | 1.961 ppb             | 3.0 %             |
| 209Bi (KED) | 78.387 %              | 1.3 %             |
| 232Th (KED) | 0.647 ppb             | 1.2 %             |
| 238U (KED)  | 0.142 ppb             | 2.1 %             |

| Category   | Concentration average | Intensity average | Intensity RSD |
|------------|-----------------------|-------------------|---------------|
| 6Li (KED)  | 136.720 %             | 3,339 cps         | 7.6 %         |
| 9Be (KED)  | 0.056 ppb             | 9 cps             | 86.6 %        |
| 11B (KED)  | -10.635 ppb           | 1,189 cps         | 13.1 %        |
| 24Mg (KED) | 1,295.595 ppb         | 772,312 cps       | 1.3 %         |
| 27Al (KED) | 1,812.649 ppb         | 272,824 cps       | 1.6 %         |

# Comprehensive

9/30/2021 2:22:41 PM

| Category    | Concentration average | Intensity average | Intensity RSD |
|-------------|-----------------------|-------------------|---------------|
| 45Sc (KED)  | 131.120 %             | 50,185 cps        | 1.5 %         |
| 51V (KED)   | 3.153 ppb             | 26,726 cps        | 2.7 %         |
| 52Cr (KED)  | 4.599 ppb             | 61,350 cps        | 0.9 %         |
| 55Mn (KED)  | 42.681 ppb            | 300,163 cps       | 0.9 %         |
| 56Fe (KED)  | 1,944.798 ppb         | 23,727,968 cps    | 1.4 %         |
| 58Ni (KED)  | 8.496 ppb             | 129,083 cps       | 0.6 %         |
| 59Co (KED)  | 0.835 ppb             | 21,433 cps        | 1.6 %         |
| 63Cu (KED)  | 10.641 ppb            | 179,022 cps       | 0.4 %         |
| 64Zn (KED)  | 142.207 ppb           | 644,703 cps       | 0.6 %         |
| 69Ga (KED)  | 3.428 ppb             | 20,515 cps        | 0.9 %         |
| 75As (KED)  | 1.052 ppb             | 1,430 cps         | 4.0 %         |
| 80Se (KED)  | 0.279 ppb             | 1,609 cps         | 3.6 %         |
| 85Rb (KED)  | 4.239 ppb             | 25,409 cps        | 0.6 %         |
| 88Sr (KED)  | 20.673 ppb            | 181,558 cps       | 2.2 %         |
| 89Y (KED)   | 115.939 %             | 451,576 cps       | 0.6 %         |
| 107Ag (KED) | 0.106 ppb             | 4,972 cps         | 2.7 %         |
| 114Cd (KED) | 0.079 ppb             | 1,425 cps         | 1.6 %         |
| 115In (KED) | 98.170 %              | 745,434 cps       | 0.8 %         |
| 133Cs (KED) | 0.356 ppb             | 10,002 cps        | 1.0 %         |
| 138Ba (KED) | 13.475 ppb            | 507,699 cps       | 1.6 %         |
| 139La (KED) | 1.690 ppb             | 129,092 cps       | 1.5 %         |
| 140Ce (KED) | 3.573 ppb             | 363,245 cps       | 2.4 %         |
| 141Pr (KED) | 0.416 ppb             | 45,263 cps        | 1.3 %         |
| 142Nd (KED) | 2.187 ppb             | 95,858 cps        | 2.6 %         |
| 152Sm (KED) | 0.304 ppb             | 12,584 cps        | 1.5 %         |
| 153Eu (KED) | 0.058 ppb             | 4,833 cps         | 2.8 %         |
| 158Gd (KED) | 0.263 ppb             | 14,614 cps        | 0.8 %         |
| 159Tb (KED) | 94.565 %              | 4,026,518 cps     | 1.3 %         |
| 164Dy (KED) | 0.181 ppb             | 11,774 cps        | 1.8 %         |
| 166Er (KED) | 0.085 ppb             | 6,904 cps         | 3.1 %         |
| 169Tm (KED) | 0.011 ppb             | 2,976 cps         | 4.1 %         |
| 174Yb (KED) | 0.067 ppb             | 6,344 cps         | 6.3 %         |
| 175Lu (KED) | -0.001 ppb            | 19,373 cps        | 1.5 %         |
| 205Tl (KED) | 0.023 ppb             | 3,678 cps         | 7.5 %         |
| 208Pb (KED) | 1.961 ppb             | 245,963 cps       | 2.2 %         |
| 209Bi (KED) | 78.387 %              | 3,053,092 cps     | 1.3 %         |
| 232Th (KED) | 0.647 ppb             | 151,146 cps       | 0.6 %         |
| 238U (KED)  | 0.142 ppb             | 38,663 cps        | 2.2 %         |

# Comprehensive

9/30/2021 2:22:41 PM

## Sample Summary

Instrument ID: iCAP Q

Analysis index: 18

Analysis name: 047678(178591)jian

Analysis started at: 9/30/2021 12:37:34 PM

User name: WINDOWS-UPCI4ER\Administrator

| Category    | Concentration average | Concentration RSD |
|-------------|-----------------------|-------------------|
| 6Li (KED)   | 138.813 %             | 2.3 %             |
| 9Be (KED)   | 0.071 ppb             | 43.6 %            |
| 11B (KED)   | -14.780 ppb           | 0.9 %             |
| 24Mg (KED)  | 1,577.318 ppb         | 1.2 %             |
| 27Al (KED)  | 2,139.431 ppb         | 3.0 %             |
| 45Sc (KED)  | 139.011 %             | 1.7 %             |
| 51V (KED)   | 3.811 ppb             | 2.5 %             |
| 52Cr (KED)  | 4.497 ppb             | 1.3 %             |
| 55Mn (KED)  | 47.533 ppb            | 2.7 %             |
| 56Fe (KED)  | 2,264.628 ppb         | 0.7 %             |
| 58Ni (KED)  | 9.578 ppb             | 1.6 %             |
| 59Co (KED)  | 0.907 ppb             | 1.0 %             |
| 63Cu (KED)  | 11.675 ppb            | 1.3 %             |
| 64Zn (KED)  | 141.972 ppb           | 0.4 %             |
| 69Ga (KED)  | 4.171 ppb             | 3.6 %             |
| 75As (KED)  | 1.133 ppb             | 3.5 %             |
| 80Se (KED)  | -0.226 ppb            | 45.6 %            |
| 85Rb (KED)  | 5.590 ppb             | 1.7 %             |
| 88Sr (KED)  | 22.901 ppb            | 1.3 %             |
| 89Y (KED)   | 115.444 %             | 1.2 %             |
| 107Ag (KED) | 0.058 ppb             | 3.4 %             |
| 114Cd (KED) | 0.056 ppb             | 3.8 %             |
| 115In (KED) | 97.267 %              | 0.6 %             |
| 133Cs (KED) | 0.445 ppb             | 4.1 %             |
| 138Ba (KED) | 15.942 ppb            | 1.0 %             |
| 139La (KED) | 2.120 ppb             | 0.4 %             |
| 140Ce (KED) | 4.388 ppb             | 0.8 %             |
| 141Pr (KED) | 0.504 ppb             | 1.3 %             |
| 142Nd (KED) | 2.696 ppb             | 1.9 %             |
| 152Sm (KED) | 0.366 ppb             | 1.7 %             |
| 153Eu (KED) | 0.073 ppb             | 3.0 %             |
| 158Gd (KED) | 0.322 ppb             | 1.5 %             |
| 159Tb (KED) | 94.320 %              | 1.4 %             |
| 164Dy (KED) | 0.223 ppb             | 3.1 %             |
| 166Er (KED) | 0.111 ppb             | 0.7 %             |
| 169Tm (KED) | 0.015 ppb             | 3.8 %             |
| 174Yb (KED) | 0.084 ppb             | 2.9 %             |
| 175Lu (KED) | -0.001 ppb            | 434.8 %           |
| 205Tl (KED) | 0.031 ppb             | 2.5 %             |
| 208Pb (KED) | 2.018 ppb             | 2.2 %             |
| 209Bi (KED) | 76.501 %              | 2.8 %             |
| 232Th (KED) | 0.840 ppb             | 1.7 %             |
| 238U (KED)  | 0.170 ppb             | 3.3 %             |

| Category   | Concentration average | Intensity average | Intensity RSD |
|------------|-----------------------|-------------------|---------------|
| 6Li (KED)  | 138.813 %             | 3,390 cps         | 2.3 %         |
| 9Be (KED)  | 0.071 ppb             | 11 cps            | 45.8 %        |
| 11B (KED)  | -14.780 ppb           | 862 cps           | 3.5 %         |
| 24Mg (KED) | 1,577.318 ppb         | 957,301 cps       | 1.8 %         |
| 27Al (KED) | 2,139.431 ppb         | 341,262 cps       | 1.5 %         |

# Comprehensive

9/30/2021 2:22:41 PM

| Category    | Concentration average | Intensity average | Intensity RSD |
|-------------|-----------------------|-------------------|---------------|
| 45Sc (KED)  | 139.011 %             | 53,205 cps        | 1.7 %         |
| 51V (KED)   | 3.811 ppb             | 34,232 cps        | 1.4 %         |
| 52Cr (KED)  | 4.497 ppb             | 63,607 cps        | 1.3 %         |
| 55Mn (KED)  | 47.533 ppb            | 354,252 cps       | 1.2 %         |
| 56Fe (KED)  | 2,264.628 ppb         | 29,298,554 cps    | 1.5 %         |
| 58Ni (KED)  | 9.578 ppb             | 154,216 cps       | 1.1 %         |
| 59Co (KED)  | 0.907 ppb             | 24,684 cps        | 2.0 %         |
| 63Cu (KED)  | 11.675 ppb            | 195,495 cps       | 0.5 %         |
| 64Zn (KED)  | 141.972 ppb           | 640,928 cps       | 1.4 %         |
| 69Ga (KED)  | 4.171 ppb             | 24,830 cps        | 2.7 %         |
| 75As (KED)  | 1.133 ppb             | 1,533 cps         | 3.6 %         |
| 80Se (KED)  | -0.226 ppb            | 1,400 cps         | 3.9 %         |
| 85Rb (KED)  | 5.590 ppb             | 33,355 cps        | 2.0 %         |
| 88Sr (KED)  | 22.901 ppb            | 200,214 cps       | 0.4 %         |
| 89Y (KED)   | 115.444 %             | 449,650 cps       | 1.2 %         |
| 107Ag (KED) | 0.058 ppb             | 2,765 cps         | 2.7 %         |
| 114Cd (KED) | 0.056 ppb             | 1,022 cps         | 4.1 %         |
| 115In (KED) | 97.267 %              | 738,581 cps       | 0.6 %         |
| 133Cs (KED) | 0.445 ppb             | 12,383 cps        | 3.5 %         |
| 138Ba (KED) | 15.942 ppb            | 598,800 cps       | 0.8 %         |
| 139La (KED) | 2.120 ppb             | 161,540 cps       | 1.2 %         |
| 140Ce (KED) | 4.388 ppb             | 445,005 cps       | 1.5 %         |
| 141Pr (KED) | 0.504 ppb             | 54,600 cps        | 1.6 %         |
| 142Nd (KED) | 2.696 ppb             | 117,843 cps       | 0.5 %         |
| 152Sm (KED) | 0.366 ppb             | 15,090 cps        | 0.7 %         |
| 153Eu (KED) | 0.073 ppb             | 6,083 cps         | 4.0 %         |
| 158Gd (KED) | 0.322 ppb             | 17,879 cps        | 1.3 %         |
| 159Tb (KED) | 94.320 %              | 4,016,098 cps     | 1.4 %         |
| 164Dy (KED) | 0.223 ppb             | 14,478 cps        | 1.9 %         |
| 166Er (KED) | 0.111 ppb             | 8,940 cps         | 1.9 %         |
| 169Tm (KED) | 0.015 ppb             | 3,851 cps         | 5.0 %         |
| 174Yb (KED) | 0.084 ppb             | 7,898 cps         | 1.6 %         |
| 175Lu (KED) | -0.001 ppb            | 19,351 cps        | 3.1 %         |
| 205Tl (KED) | 0.031 ppb             | 4,735 cps         | 2.1 %         |
| 208Pb (KED) | 2.018 ppb             | 246,076 cps       | 2.1 %         |
| 209Bi (KED) | 76.501 %              | 2,979,644 cps     | 2.8 %         |
| 232Th (KED) | 0.840 ppb             | 190,832 cps       | 1.1 %         |
| 238U (KED)  | 0.170 ppb             | 44,970 cps        | 2.7 %         |

# Comprehensive

9/30/2021 2:22:41 PM

## Sample Summary

Instrument ID: iCAP Q

Analysis index: 19

Analysis name: 029245(179423)jian

Analysis started at: 9/30/2021 12:41:41 PM

User name: WINDOWS-UPCI4ER\Administrator

| Category    | Concentration average | Concentration RSD |
|-------------|-----------------------|-------------------|
| 6Li (KED)   | 136.038 %             | 2.9 %             |
| 9Be (KED)   | 0.021 ppb             | 99.6 %            |
| 11B (KED)   | -14.832 ppb           | 6.4 %             |
| 24Mg (KED)  | 1,098.968 ppb         | 5.3 %             |
| 27Al (KED)  | 1,414.195 ppb         | 2.1 %             |
| 45Sc (KED)  | 136.029 %             | 0.3 %             |
| 51V (KED)   | 2.602 ppb             | 2.4 %             |
| 52Cr (KED)  | 3.423 ppb             | 3.3 %             |
| 55Mn (KED)  | 31.523 ppb            | 1.3 %             |
| 56Fe (KED)  | 1,554.019 ppb         | 1.2 %             |
| 58Ni (KED)  | 6.719 ppb             | 1.6 %             |
| 59Co (KED)  | 0.646 ppb             | 2.6 %             |
| 63Cu (KED)  | 10.507 ppb            | 3.0 %             |
| 64Zn (KED)  | 141.141 ppb           | 3.1 %             |
| 69Ga (KED)  | 2.989 ppb             | 3.4 %             |
| 75As (KED)  | 0.846 ppb             | 3.7 %             |
| 80Se (KED)  | 0.041 ppb             | 430.9 %           |
| 85Rb (KED)  | 4.798 ppb             | 2.8 %             |
| 88Sr (KED)  | 14.823 ppb            | 0.7 %             |
| 89Y (KED)   | 112.784 %             | 1.9 %             |
| 107Ag (KED) | 0.042 ppb             | 8.5 %             |
| 114Cd (KED) | 0.047 ppb             | 5.2 %             |
| 115In (KED) | 97.414 %              | 1.2 %             |
| 133Cs (KED) | 0.289 ppb             | 2.9 %             |
| 138Ba (KED) | 11.223 ppb            | 2.0 %             |
| 139La (KED) | 1.463 ppb             | 1.4 %             |
| 140Ce (KED) | 2.962 ppb             | 0.9 %             |
| 141Pr (KED) | 0.344 ppb             | 1.0 %             |
| 142Nd (KED) | 1.829 ppb             | 0.4 %             |
| 152Sm (KED) | 0.252 ppb             | 4.0 %             |
| 153Eu (KED) | 0.045 ppb             | 2.1 %             |
| 158Gd (KED) | 0.218 ppb             | 2.2 %             |
| 159Tb (KED) | 93.444 %              | 1.0 %             |
| 164Dy (KED) | 0.146 ppb             | 3.7 %             |
| 166Er (KED) | 0.071 ppb             | 4.0 %             |
| 169Tm (KED) | 0.009 ppb             | 4.4 %             |
| 174Yb (KED) | 0.054 ppb             | 1.3 %             |
| 175Lu (KED) | -0.005 ppb            | 28.9 %            |
| 205Tl (KED) | 0.020 ppb             | 0.7 %             |
| 208Pb (KED) | 1.544 ppb             | 2.7 %             |
| 209Bi (KED) | 75.810 %              | 0.8 %             |
| 232Th (KED) | 0.525 ppb             | 0.8 %             |
| 238U (KED)  | 0.112 ppb             | 2.8 %             |

| Category   | Concentration average | Intensity average | Intensity RSD |
|------------|-----------------------|-------------------|---------------|
| 6Li (KED)  | 136.038 %             | 3,323 cps         | 2.9 %         |
| 9Be (KED)  | 0.021 ppb             | 3 cps             | 100.0 %       |
| 11B (KED)  | -14.832 ppb           | 840 cps           | 9.0 %         |
| 24Mg (KED) | 1,098.968 ppb         | 653,306 cps       | 2.3 %         |
| 27Al (KED) | 1,414.195 ppb         | 220,887 cps       | 2.4 %         |

# Comprehensive

9/30/2021 2:22:41 PM

| Category    | Concentration average | Intensity average | Intensity RSD |
|-------------|-----------------------|-------------------|---------------|
| 45Sc (KED)  | 136.029 %             | 52,064 cps        | 0.3 %         |
| 51V (KED)   | 2.602 ppb             | 22,881 cps        | 2.5 %         |
| 52Cr (KED)  | 3.423 ppb             | 47,440 cps        | 3.0 %         |
| 55Mn (KED)  | 31.523 ppb            | 230,170 cps       | 1.0 %         |
| 56Fe (KED)  | 1,554.019 ppb         | 19,677,530 cps    | 1.2 %         |
| 58Ni (KED)  | 6.719 ppb             | 106,045 cps       | 1.4 %         |
| 59Co (KED)  | 0.646 ppb             | 17,229 cps        | 2.3 %         |
| 63Cu (KED)  | 10.507 ppb            | 171,919 cps       | 1.1 %         |
| 64Zn (KED)  | 141.141 ppb           | 622,252 cps       | 1.3 %         |
| 69Ga (KED)  | 2.989 ppb             | 17,411 cps        | 2.5 %         |
| 75As (KED)  | 0.846 ppb             | 1,123 cps         | 5.4 %         |
| 80Se (KED)  | 0.041 ppb             | 1,471 cps         | 3.2 %         |
| 85Rb (KED)  | 4.798 ppb             | 27,964 cps        | 0.9 %         |
| 88Sr (KED)  | 14.823 ppb            | 126,714 cps       | 2.2 %         |
| 89Y (KED)   | 112.784 %             | 439,288 cps       | 1.9 %         |
| 107Ag (KED) | 0.042 ppb             | 2,026 cps         | 7.3 %         |
| 114Cd (KED) | 0.047 ppb             | 874 cps           | 5.0 %         |
| 115In (KED) | 97.414 %              | 739,697 cps       | 1.2 %         |
| 133Cs (KED) | 0.289 ppb             | 8,083 cps         | 3.4 %         |
| 138Ba (KED) | 11.223 ppb            | 418,315 cps       | 2.1 %         |
| 139La (KED) | 1.463 ppb             | 110,491 cps       | 0.5 %         |
| 140Ce (KED) | 2.962 ppb             | 297,751 cps       | 0.6 %         |
| 141Pr (KED) | 0.344 ppb             | 36,929 cps        | 0.1 %         |
| 142Nd (KED) | 1.829 ppb             | 79,251 cps        | 1.3 %         |
| 152Sm (KED) | 0.252 ppb             | 10,311 cps        | 3.6 %         |
| 153Eu (KED) | 0.045 ppb             | 3,718 cps         | 2.6 %         |
| 158Gd (KED) | 0.218 ppb             | 11,988 cps        | 1.3 %         |
| 159Tb (KED) | 93.444 %              | 3,978,785 cps     | 1.0 %         |
| 164Dy (KED) | 0.146 ppb             | 9,422 cps         | 2.9 %         |
| 166Er (KED) | 0.071 ppb             | 5,749 cps         | 3.1 %         |
| 169Tm (KED) | 0.009 ppb             | 2,402 cps         | 4.7 %         |
| 174Yb (KED) | 0.054 ppb             | 5,080 cps         | 2.3 %         |
| 175Lu (KED) | -0.005 ppb            | 18,517 cps        | 2.2 %         |
| 205Tl (KED) | 0.020 ppb             | 3,107 cps         | 0.5 %         |
| 208Pb (KED) | 1.544 ppb             | 194,116 cps       | 1.4 %         |
| 209Bi (KED) | 75.810 %              | 2,952,696 cps     | 0.8 %         |
| 232Th (KED) | 0.525 ppb             | 119,014 cps       | 0.6 %         |
| 238U (KED)  | 0.112 ppb             | 29,605 cps        | 1.9 %         |

# Comprehensive

9/30/2021 2:22:41 PM

## Sample Summary

Instrument ID: iCAP Q

Analysis index: 20

Analysis name: 178562jian

Analysis started at: 9/30/2021 12:46:34 PM

User name: WINDOWS-UPCI4ER\Administrator

| Category    | Concentration average | Concentration RSD |
|-------------|-----------------------|-------------------|
| 6Li (KED)   | 130.759 %             | 3.8 %             |
| 9Be (KED)   | 0.031 ppb             | 116.9 %           |
| 11B (KED)   | -17.545 ppb           | 0.8 %             |
| 24Mg (KED)  | 697.473 ppb           | 4.2 %             |
| 27Al (KED)  | 813.215 ppb           | 0.8 %             |
| 45Sc (KED)  | 133.373 %             | 1.5 %             |
| 51V (KED)   | 1.476 ppb             | 1.4 %             |
| 52Cr (KED)  | 2.918 ppb             | 1.1 %             |
| 55Mn (KED)  | 18.842 ppb            | 1.0 %             |
| 56Fe (KED)  | 914.271 ppb           | 1.8 %             |
| 58Ni (KED)  | 4.399 ppb             | 1.7 %             |
| 59Co (KED)  | 0.401 ppb             | 3.8 %             |
| 63Cu (KED)  | 10.402 ppb            | 1.5 %             |
| 64Zn (KED)  | 151.567 ppb           | 2.6 %             |
| 69Ga (KED)  | 2.135 ppb             | 2.1 %             |
| 75As (KED)  | 0.499 ppb             | 8.7 %             |
| 80Se (KED)  | 0.243 ppb             | 143.3 %           |
| 85Rb (KED)  | 2.971 ppb             | 3.4 %             |
| 88Sr (KED)  | 9.060 ppb             | 1.8 %             |
| 89Y (KED)   | 108.734 %             | 1.0 %             |
| 107Ag (KED) | 0.095 ppb             | 2.7 %             |
| 114Cd (KED) | 0.050 ppb             | 3.1 %             |
| 115In (KED) | 95.338 %              | 3.0 %             |
| 133Cs (KED) | 0.168 ppb             | 4.0 %             |
| 138Ba (KED) | 7.994 ppb             | 0.8 %             |
| 139La (KED) | 0.798 ppb             | 1.6 %             |
| 140Ce (KED) | 1.608 ppb             | 0.2 %             |
| 141Pr (KED) | 0.190 ppb             | 1.3 %             |
| 142Nd (KED) | 0.985 ppb             | 0.8 %             |
| 152Sm (KED) | 0.135 ppb             | 1.9 %             |
| 153Eu (KED) | 0.026 ppb             | 1.9 %             |
| 158Gd (KED) | 0.120 ppb             | 6.0 %             |
| 159Tb (KED) | 90.146 %              | 1.3 %             |
| 164Dy (KED) | 0.077 ppb             | 1.8 %             |
| 166Er (KED) | 0.040 ppb             | 4.1 %             |
| 169Tm (KED) | 0.005 ppb             | 2.7 %             |
| 174Yb (KED) | 0.031 ppb             | 5.5 %             |
| 175Lu (KED) | -0.012 ppb            | 6.9 %             |
| 205Tl (KED) | 0.013 ppb             | 4.2 %             |
| 208Pb (KED) | 0.955 ppb             | 0.6 %             |
| 209Bi (KED) | 73.797 %              | 1.1 %             |
| 232Th (KED) | 0.278 ppb             | 1.3 %             |
| 238U (KED)  | 0.068 ppb             | 2.9 %             |

| Category   | Concentration average | Intensity average | Intensity RSD |
|------------|-----------------------|-------------------|---------------|
| 6Li (KED)  | 130.759 %             | 3,194 cps         | 3.8 %         |
| 9Be (KED)  | 0.031 ppb             | 4 cps             | 114.6 %       |
| 11B (KED)  | -17.545 ppb           | 589 cps           | 5.7 %         |
| 24Mg (KED) | 697.473 ppb           | 398,803 cps       | 0.9 %         |
| 27Al (KED) | 813.215 ppb           | 124,625 cps       | 2.0 %         |

# Comprehensive

9/30/2021 2:22:41 PM

| Category    | Concentration average | Intensity average | Intensity RSD |
|-------------|-----------------------|-------------------|---------------|
| 45Sc (KED)  | 133.373 %             | 51,048 cps        | 1.5 %         |
| 51V (KED)   | 1.476 ppb             | 12,740 cps        | 2.6 %         |
| 52Cr (KED)  | 2.918 ppb             | 39,692 cps        | 1.5 %         |
| 55Mn (KED)  | 18.842 ppb            | 135,125 cps       | 0.5 %         |
| 56Fe (KED)  | 914.271 ppb           | 11,353,198 cps    | 1.0 %         |
| 58Ni (KED)  | 4.399 ppb             | 68,268 cps        | 0.9 %         |
| 59Co (KED)  | 0.401 ppb             | 10,513 cps        | 2.3 %         |
| 63Cu (KED)  | 10.402 ppb            | 164,149 cps       | 0.8 %         |
| 64Zn (KED)  | 151.567 ppb           | 644,222 cps       | 1.6 %         |
| 69Ga (KED)  | 2.135 ppb             | 12,018 cps        | 1.8 %         |
| 75As (KED)  | 0.499 ppb             | 646 cps           | 9.6 %         |
| 80Se (KED)  | 0.243 ppb             | 1,496 cps         | 9.0 %         |
| 85Rb (KED)  | 2.971 ppb             | 16,709 cps        | 2.8 %         |
| 88Sr (KED)  | 9.060 ppb             | 74,766 cps        | 1.2 %         |
| 89Y (KED)   | 108.734 %             | 423,514 cps       | 1.0 %         |
| 107Ag (KED) | 0.095 ppb             | 4,350 cps         | 5.6 %         |
| 114Cd (KED) | 0.050 ppb             | 907 cps           | 5.3 %         |
| 115In (KED) | 95.338 %              | 723,930 cps       | 3.0 %         |
| 133Cs (KED) | 0.168 ppb             | 4,616 cps         | 4.6 %         |
| 138Ba (KED) | 7.994 ppb             | 288,063 cps       | 2.1 %         |
| 139La (KED) | 0.798 ppb             | 58,170 cps        | 0.4 %         |
| 140Ce (KED) | 1.608 ppb             | 156,093 cps       | 1.1 %         |
| 141Pr (KED) | 0.190 ppb             | 19,717 cps        | 1.2 %         |
| 142Nd (KED) | 0.985 ppb             | 41,193 cps        | 1.2 %         |
| 152Sm (KED) | 0.135 ppb             | 5,338 cps         | 0.6 %         |
| 153Eu (KED) | 0.026 ppb             | 2,076 cps         | 3.1 %         |
| 158Gd (KED) | 0.120 ppb             | 6,377 cps         | 5.1 %         |
| 159Tb (KED) | 90.146 %              | 3,838,373 cps     | 1.3 %         |
| 164Dy (KED) | 0.077 ppb             | 4,829 cps         | 1.0 %         |
| 166Er (KED) | 0.040 ppb             | 3,232 cps         | 4.8 %         |
| 169Tm (KED) | 0.005 ppb             | 1,342 cps         | 1.9 %         |
| 174Yb (KED) | 0.031 ppb             | 2,790 cps         | 4.1 %         |
| 175Lu (KED) | -0.012 ppb            | 16,800 cps        | 1.7 %         |
| 205Tl (KED) | 0.013 ppb             | 1,899 cps         | 3.1 %         |
| 208Pb (KED) | 0.955 ppb             | 128,724 cps       | 1.0 %         |
| 209Bi (KED) | 73.797 %              | 2,874,327 cps     | 1.1 %         |
| 232Th (KED) | 0.278 ppb             | 62,318 cps        | 1.0 %         |
| 238U (KED)  | 0.068 ppb             | 17,917 cps        | 3.1 %         |

# Comprehensive

9/30/2021 2:22:41 PM

## Sample Summary

Instrument ID: iCAP Q

Analysis index: 21

Analysis name: 048723(178655)jian

Analysis started at: 9/30/2021 12:50:46 PM

User name: WINDOWS-UPCI4ER\Administrator

| Category    | Concentration average | Concentration RSD |
|-------------|-----------------------|-------------------|
| 6Li (KED)   | 125.845 %             | 3.2 %             |
| 9Be (KED)   | 0.023 ppb             | 173.2 %           |
| 11B (KED)   | -16.013 ppb           | 5.6 %             |
| 24Mg (KED)  | 1,076.674 ppb         | 4.6 %             |
| 27Al (KED)  | 1,357.459 ppb         | 0.8 %             |
| 45Sc (KED)  | 129.899 %             | 1.1 %             |
| 51V (KED)   | 2.411 ppb             | 0.6 %             |
| 52Cr (KED)  | 3.015 ppb             | 2.1 %             |
| 55Mn (KED)  | 33.060 ppb            | 0.9 %             |
| 56Fe (KED)  | 1,486.421 ppb         | 1.0 %             |
| 58Ni (KED)  | 6.380 ppb             | 2.1 %             |
| 59Co (KED)  | 0.628 ppb             | 0.7 %             |
| 63Cu (KED)  | 10.469 ppb            | 1.1 %             |
| 64Zn (KED)  | 140.757 ppb           | 1.2 %             |
| 69Ga (KED)  | 2.666 ppb             | 1.8 %             |
| 75As (KED)  | 0.751 ppb             | 3.8 %             |
| 80Se (KED)  | 0.012 ppb             | 1,820.5 %         |
| 85Rb (KED)  | 3.401 ppb             | 3.3 %             |
| 88Sr (KED)  | 16.588 ppb            | 1.1 %             |
| 89Y (KED)   | 117.507 %             | 1.2 %             |
| 107Ag (KED) | 0.035 ppb             | 4.0 %             |
| 114Cd (KED) | 0.053 ppb             | 11.4 %            |
| 115In (KED) | 107.815 %             | 1.7 %             |
| 133Cs (KED) | 0.273 ppb             | 0.3 %             |
| 138Ba (KED) | 10.866 ppb            | 1.7 %             |
| 139La (KED) | 1.450 ppb             | 1.5 %             |
| 140Ce (KED) | 2.987 ppb             | 1.7 %             |
| 141Pr (KED) | 0.349 ppb             | 0.4 %             |
| 142Nd (KED) | 1.788 ppb             | 1.2 %             |
| 152Sm (KED) | 0.236 ppb             | 1.7 %             |
| 153Eu (KED) | 0.044 ppb             | 4.0 %             |
| 158Gd (KED) | 0.200 ppb             | 0.8 %             |
| 159Tb (KED) | 109.105 %             | 1.2 %             |
| 164Dy (KED) | 0.132 ppb             | 2.6 %             |
| 166Er (KED) | 0.063 ppb             | 1.3 %             |
| 169Tm (KED) | 0.008 ppb             | 6.7 %             |
| 174Yb (KED) | 0.050 ppb             | 1.6 %             |
| 175Lu (KED) | -0.008 ppb            | 66.4 %            |
| 205Tl (KED) | 0.020 ppb             | 1.8 %             |
| 208Pb (KED) | 1.431 ppb             | 1.3 %             |
| 209Bi (KED) | 89.901 %              | 2.0 %             |
| 232Th (KED) | 0.512 ppb             | 0.9 %             |
| 238U (KED)  | 0.111 ppb             | 0.7 %             |

| Category   | Concentration average | Intensity average | Intensity RSD |
|------------|-----------------------|-------------------|---------------|
| 6Li (KED)  | 125.845 %             | 3,074 cps         | 3.2 %         |
| 9Be (KED)  | 0.023 ppb             | 3 cps             | 173.2 %       |
| 11B (KED)  | -16.013 ppb           | 684 cps           | 7.6 %         |
| 24Mg (KED) | 1,076.674 ppb         | 592,157 cps       | 1.7 %         |
| 27Al (KED) | 1,357.459 ppb         | 202,471 cps       | 1.3 %         |

# Comprehensive

9/30/2021 2:22:41 PM

| Category    | Concentration average | Intensity average | Intensity RSD |
|-------------|-----------------------|-------------------|---------------|
| 45Sc (KED)  | 129.899 %             | 49,718 cps        | 1.1 %         |
| 51V (KED)   | 2.411 ppb             | 20,251 cps        | 1.3 %         |
| 52Cr (KED)  | 3.015 ppb             | 39,936 cps        | 2.0 %         |
| 55Mn (KED)  | 33.060 ppb            | 230,475 cps       | 0.5 %         |
| 56Fe (KED)  | 1,486.421 ppb         | 17,972,949 cps    | 0.7 %         |
| 58Ni (KED)  | 6.380 ppb             | 96,182 cps        | 1.4 %         |
| 59Co (KED)  | 0.628 ppb             | 15,989 cps        | 0.5 %         |
| 63Cu (KED)  | 10.469 ppb            | 178,524 cps       | 0.9 %         |
| 64Zn (KED)  | 140.757 ppb           | 646,745 cps       | 0.1 %         |
| 69Ga (KED)  | 2.666 ppb             | 16,191 cps        | 0.6 %         |
| 75As (KED)  | 0.751 ppb             | 1,040 cps         | 4.9 %         |
| 80Se (KED)  | 0.012 ppb             | 1,521 cps         | 4.7 %         |
| 85Rb (KED)  | 3.401 ppb             | 20,662 cps        | 2.3 %         |
| 88Sr (KED)  | 16.588 ppb            | 147,689 cps       | 0.5 %         |
| 89Y (KED)   | 117.507 %             | 457,687 cps       | 1.2 %         |
| 107Ag (KED) | 0.035 ppb             | 1,896 cps         | 2.5 %         |
| 114Cd (KED) | 0.053 ppb             | 1,071 cps         | 8.8 %         |
| 115In (KED) | 107.815 %             | 818,675 cps       | 1.7 %         |
| 133Cs (KED) | 0.273 ppb             | 8,458 cps         | 1.8 %         |
| 138Ba (KED) | 10.866 ppb            | 472,910 cps       | 1.0 %         |
| 139La (KED) | 1.450 ppb             | 127,801 cps       | 0.5 %         |
| 140Ce (KED) | 2.987 ppb             | 350,491 cps       | 0.5 %         |
| 141Pr (KED) | 0.349 ppb             | 43,787 cps        | 1.2 %         |
| 142Nd (KED) | 1.788 ppb             | 90,430 cps        | 1.3 %         |
| 152Sm (KED) | 0.236 ppb             | 11,272 cps        | 2.3 %         |
| 153Eu (KED) | 0.044 ppb             | 4,207 cps         | 3.1 %         |
| 158Gd (KED) | 0.200 ppb             | 12,854 cps        | 1.9 %         |
| 159Tb (KED) | 109.105 %             | 4,645,622 cps     | 1.2 %         |
| 164Dy (KED) | 0.132 ppb             | 9,946 cps         | 3.7 %         |
| 166Er (KED) | 0.063 ppb             | 5,956 cps         | 1.4 %         |
| 169Tm (KED) | 0.008 ppb             | 2,498 cps         | 6.9 %         |
| 174Yb (KED) | 0.050 ppb             | 5,475 cps         | 0.6 %         |
| 175Lu (KED) | -0.008 ppb            | 21,062 cps        | 5.4 %         |
| 205Tl (KED) | 0.020 ppb             | 3,658 cps         | 2.9 %         |
| 208Pb (KED) | 1.431 ppb             | 216,092 cps       | 1.4 %         |
| 209Bi (KED) | 89.901 %              | 3,501,545 cps     | 2.0 %         |
| 232Th (KED) | 0.512 ppb             | 137,781 cps       | 2.4 %         |
| 238U (KED)  | 0.111 ppb             | 34,936 cps        | 1.3 %         |

# Comprehensive

9/30/2021 2:22:41 PM

## Sample Summary

Instrument ID: iCAP Q

Analysis index: 22

Analysis name: 178640jian

Analysis started at: 9/30/2021 1:29:11 PM

User name: WINDOWS-UPCI4ER\Administrator

| Category    | Concentration average | Concentration RSD |
|-------------|-----------------------|-------------------|
| 6Li (KED)   | 133.034 %             | 2.1 %             |
| 9Be (KED)   | 0.037 ppb             | 67.8 %            |
| 11B (KED)   | -15.904 ppb           | 3.2 %             |
| 24Mg (KED)  | 1,296.841 ppb         | 1.5 %             |
| 27Al (KED)  | 1,599.555 ppb         | 0.8 %             |
| 45Sc (KED)  | 133.087 %             | 1.3 %             |
| 51V (KED)   | 2.778 ppb             | 1.4 %             |
| 52Cr (KED)  | 3.423 ppb             | 2.0 %             |
| 55Mn (KED)  | 39.832 ppb            | 2.4 %             |
| 56Fe (KED)  | 1,597.912 ppb         | 0.9 %             |
| 58Ni (KED)  | 7.031 ppb             | 2.1 %             |
| 59Co (KED)  | 0.731 ppb             | 1.7 %             |
| 63Cu (KED)  | 11.021 ppb            | 1.5 %             |
| 64Zn (KED)  | 143.218 ppb           | 1.1 %             |
| 69Ga (KED)  | 2.907 ppb             | 0.5 %             |
| 75As (KED)  | 0.823 ppb             | 8.4 %             |
| 80Se (KED)  | -0.253 ppb            | 30.3 %            |
| 85Rb (KED)  | 3.503 ppb             | 2.8 %             |
| 88Sr (KED)  | 19.685 ppb            | 1.3 %             |
| 89Y (KED)   | 119.981 %             | 1.4 %             |
| 107Ag (KED) | 0.108 ppb             | 4.7 %             |
| 114Cd (KED) | 0.072 ppb             | 2.8 %             |
| 115In (KED) | 106.692 %             | 1.5 %             |
| 133Cs (KED) | 0.337 ppb             | 3.5 %             |
| 138Ba (KED) | 12.222 ppb            | 1.7 %             |
| 139La (KED) | 1.374 ppb             | 1.0 %             |
| 140Ce (KED) | 3.204 ppb             | 0.5 %             |
| 141Pr (KED) | 0.332 ppb             | 0.9 %             |
| 142Nd (KED) | 1.882 ppb             | 0.8 %             |
| 152Sm (KED) | 0.250 ppb             | 3.5 %             |
| 153Eu (KED) | 0.047 ppb             | 2.2 %             |
| 158Gd (KED) | 0.221 ppb             | 1.5 %             |
| 159Tb (KED) | 106.393 %             | 0.3 %             |
| 164Dy (KED) | 0.148 ppb             | 3.3 %             |
| 166Er (KED) | 0.068 ppb             | 3.4 %             |
| 169Tm (KED) | 0.009 ppb             | 3.8 %             |
| 174Yb (KED) | 0.056 ppb             | 1.3 %             |
| 175Lu (KED) | -0.008 ppb            | 12.7 %            |
| 205Tl (KED) | 0.023 ppb             | 3.5 %             |
| 208Pb (KED) | 1.887 ppb             | 2.4 %             |
| 209Bi (KED) | 88.388 %              | 0.5 %             |
| 232Th (KED) | 0.522 ppb             | 1.9 %             |
| 238U (KED)  | 0.132 ppb             | 0.1 %             |

| Category   | Concentration average | Intensity average | Intensity RSD |
|------------|-----------------------|-------------------|---------------|
| 6Li (KED)  | 133.034 %             | 3,249 cps         | 2.1 %         |
| 9Be (KED)  | 0.037 ppb             | 6 cps             | 69.3 %        |
| 11B (KED)  | -15.904 ppb           | 733 cps           | 4.4 %         |
| 24Mg (KED) | 1,296.841 ppb         | 754,397 cps       | 1.0 %         |
| 27Al (KED) | 1,599.555 ppb         | 244,386 cps       | 0.7 %         |

# Comprehensive

9/30/2021 2:22:41 PM

| Category    | Concentration average | Intensity average | Intensity RSD |
|-------------|-----------------------|-------------------|---------------|
| 45Sc (KED)  | 133.087 %             | 50,938 cps        | 1.3 %         |
| 51V (KED)   | 2.778 ppb             | 23,903 cps        | 1.0 %         |
| 52Cr (KED)  | 3.423 ppb             | 46,421 cps        | 2.1 %         |
| 55Mn (KED)  | 39.832 ppb            | 284,335 cps       | 1.3 %         |
| 56Fe (KED)  | 1,597.912 ppb         | 19,794,143 cps    | 0.5 %         |
| 58Ni (KED)  | 7.031 ppb             | 108,529 cps       | 1.1 %         |
| 59Co (KED)  | 0.731 ppb             | 19,051 cps        | 0.4 %         |
| 63Cu (KED)  | 11.021 ppb            | 191,841 cps       | 0.2 %         |
| 64Zn (KED)  | 143.218 ppb           | 671,862 cps       | 0.4 %         |
| 69Ga (KED)  | 2.907 ppb             | 18,021 cps        | 1.5 %         |
| 75As (KED)  | 0.823 ppb             | 1,162 cps         | 9.6 %         |
| 80Se (KED)  | -0.253 ppb            | 1,443 cps         | 2.6 %         |
| 85Rb (KED)  | 3.503 ppb             | 21,728 cps        | 1.7 %         |
| 88Sr (KED)  | 19.685 ppb            | 178,897 cps       | 0.5 %         |
| 89Y (KED)   | 119.981 %             | 467,322 cps       | 1.4 %         |
| 107Ag (KED) | 0.108 ppb             | 5,527 cps         | 3.6 %         |
| 114Cd (KED) | 0.072 ppb             | 1,413 cps         | 3.5 %         |
| 115In (KED) | 106.692 %             | 810,148 cps       | 1.5 %         |
| 133Cs (KED) | 0.337 ppb             | 10,284 cps        | 2.0 %         |
| 138Ba (KED) | 12.222 ppb            | 518,459 cps       | 1.9 %         |
| 139La (KED) | 1.374 ppb             | 118,115 cps       | 1.0 %         |
| 140Ce (KED) | 3.204 ppb             | 366,669 cps       | 0.3 %         |
| 141Pr (KED) | 0.332 ppb             | 40,679 cps        | 1.2 %         |
| 142Nd (KED) | 1.882 ppb             | 92,852 cps        | 1.1 %         |
| 152Sm (KED) | 0.250 ppb             | 11,653 cps        | 3.7 %         |
| 153Eu (KED) | 0.047 ppb             | 4,442 cps         | 2.4 %         |
| 158Gd (KED) | 0.221 ppb             | 13,822 cps        | 1.4 %         |
| 159Tb (KED) | 106.393 %             | 4,530,157 cps     | 0.3 %         |
| 164Dy (KED) | 0.148 ppb             | 10,830 cps        | 3.4 %         |
| 166Er (KED) | 0.068 ppb             | 6,327 cps         | 3.0 %         |
| 169Tm (KED) | 0.009 ppb             | 2,697 cps         | 3.4 %         |
| 174Yb (KED) | 0.056 ppb             | 5,948 cps         | 1.3 %         |
| 175Lu (KED) | -0.008 ppb            | 20,622 cps        | 0.5 %         |
| 205Tl (KED) | 0.023 ppb             | 4,168 cps         | 3.9 %         |
| 208Pb (KED) | 1.887 ppb             | 268,364 cps       | 1.8 %         |
| 209Bi (KED) | 88.388 %              | 3,442,603 cps     | 0.5 %         |
| 232Th (KED) | 0.522 ppb             | 137,930 cps       | 2.0 %         |
| 238U (KED)  | 0.132 ppb             | 40,728 cps        | 0.5 %         |

# Comprehensive

9/30/2021 2:22:41 PM

## Sample Summary

Instrument ID: iCAP Q

Analysis index: 23

Analysis name: 026370(1786187)jian

Analysis started at: 9/30/2021 1:33:40 PM

User name: WINDOWS-UPCI4ER\Administrator

| Category    | Concentration average | Concentration RSD |
|-------------|-----------------------|-------------------|
| 6Li (KED)   | 135.901 %             | 3.5 %             |
| 9Be (KED)   | 0.065 ppb             | 53.9 %            |
| 11B (KED)   | -18.858 ppb           | 1.9 %             |
| 24Mg (KED)  | 1,348.737 ppb         | 5.0 %             |
| 27Al (KED)  | 1,676.855 ppb         | 2.4 %             |
| 45Sc (KED)  | 133.688 %             | 1.6 %             |
| 51V (KED)   | 3.042 ppb             | 2.4 %             |
| 52Cr (KED)  | 3.760 ppb             | 3.5 %             |
| 55Mn (KED)  | 41.687 ppb            | 1.7 %             |
| 56Fe (KED)  | 1,909.695 ppb         | 1.6 %             |
| 58Ni (KED)  | 8.641 ppb             | 1.6 %             |
| 59Co (KED)  | 0.791 ppb             | 2.3 %             |
| 63Cu (KED)  | 11.889 ppb            | 2.1 %             |
| 64Zn (KED)  | 149.150 ppb           | 0.4 %             |
| 69Ga (KED)  | 3.092 ppb             | 1.6 %             |
| 75As (KED)  | 0.884 ppb             | 2.9 %             |
| 80Se (KED)  | -0.371 ppb            | 16.9 %            |
| 85Rb (KED)  | 4.101 ppb             | 0.5 %             |
| 88Sr (KED)  | 18.955 ppb            | 0.8 %             |
| 89Y (KED)   | 119.501 %             | 1.0 %             |
| 107Ag (KED) | 0.098 ppb             | 1.1 %             |
| 114Cd (KED) | 0.048 ppb             | 9.0 %             |
| 115In (KED) | 104.228 %             | 3.1 %             |
| 133Cs (KED) | 0.359 ppb             | 2.9 %             |
| 138Ba (KED) | 12.947 ppb            | 1.6 %             |
| 139La (KED) | 1.548 ppb             | 2.4 %             |
| 140Ce (KED) | 3.200 ppb             | 1.0 %             |
| 141Pr (KED) | 0.370 ppb             | 1.3 %             |
| 142Nd (KED) | 1.966 ppb             | 1.8 %             |
| 152Sm (KED) | 0.287 ppb             | 3.3 %             |
| 153Eu (KED) | 0.055 ppb             | 1.4 %             |
| 158Gd (KED) | 0.252 ppb             | 1.3 %             |
| 159Tb (KED) | 103.152 %             | 1.4 %             |
| 164Dy (KED) | 0.175 ppb             | 3.1 %             |
| 166Er (KED) | 0.084 ppb             | 2.0 %             |
| 169Tm (KED) | 0.011 ppb             | 2.0 %             |
| 174Yb (KED) | 0.065 ppb             | 1.6 %             |
| 175Lu (KED) | -0.007 ppb            | 15.0 %            |
| 205Tl (KED) | 0.026 ppb             | 2.7 %             |
| 208Pb (KED) | 1.650 ppb             | 0.8 %             |
| 209Bi (KED) | 85.645 %              | 1.0 %             |
| 232Th (KED) | 0.626 ppb             | 1.1 %             |
| 238U (KED)  | 0.147 ppb             | 0.3 %             |

| Category   | Concentration average | Intensity average | Intensity RSD |
|------------|-----------------------|-------------------|---------------|
| 6Li (KED)  | 135.901 %             | 3,319 cps         | 3.5 %         |
| 9Be (KED)  | 0.065 ppb             | 10 cps            | 57.7 %        |
| 11B (KED)  | -18.858 ppb           | 501 cps           | 5.3 %         |
| 24Mg (KED) | 1,348.737 ppb         | 800,666 cps       | 1.6 %         |
| 27Al (KED) | 1,676.855 ppb         | 257,294 cps       | 0.9 %         |

# Comprehensive

9/30/2021 2:22:41 PM

| Category    | Concentration average | Intensity average | Intensity RSD |
|-------------|-----------------------|-------------------|---------------|
| 45Sc (KED)  | 133.688 %             | 51,168 cps        | 1.6 %         |
| 51V (KED)   | 3.042 ppb             | 26,280 cps        | 1.6 %         |
| 52Cr (KED)  | 3.760 ppb             | 51,173 cps        | 2.0 %         |
| 55Mn (KED)  | 41.687 ppb            | 298,903 cps       | 0.7 %         |
| 56Fe (KED)  | 1,909.695 ppb         | 23,759,322 cps    | 0.7 %         |
| 58Ni (KED)  | 8.641 ppb             | 133,852 cps       | 0.2 %         |
| 59Co (KED)  | 0.791 ppb             | 20,697 cps        | 1.1 %         |
| 63Cu (KED)  | 11.889 ppb            | 206,046 cps       | 1.2 %         |
| 64Zn (KED)  | 149.150 ppb           | 696,858 cps       | 0.6 %         |
| 69Ga (KED)  | 3.092 ppb             | 19,082 cps        | 1.6 %         |
| 75As (KED)  | 0.884 ppb             | 1,242 cps         | 3.4 %         |
| 80Se (KED)  | -0.371 ppb            | 1,389 cps         | 2.6 %         |
| 85Rb (KED)  | 4.101 ppb             | 25,338 cps        | 0.5 %         |
| 88Sr (KED)  | 18.955 ppb            | 171,595 cps       | 0.7 %         |
| 89Y (KED)   | 119.501 %             | 465,452 cps       | 1.0 %         |
| 107Ag (KED) | 0.098 ppb             | 4,912 cps         | 3.6 %         |
| 114Cd (KED) | 0.048 ppb             | 944 cps           | 5.2 %         |
| 115In (KED) | 104.228 %             | 791,437 cps       | 3.1 %         |
| 133Cs (KED) | 0.359 ppb             | 10,703 cps        | 1.6 %         |
| 138Ba (KED) | 12.947 ppb            | 532,253 cps       | 0.5 %         |
| 139La (KED) | 1.548 ppb             | 128,992 cps       | 1.0 %         |
| 140Ce (KED) | 3.200 ppb             | 355,042 cps       | 1.4 %         |
| 141Pr (KED) | 0.370 ppb             | 43,909 cps        | 1.7 %         |
| 142Nd (KED) | 1.966 ppb             | 94,012 cps        | 0.4 %         |
| 152Sm (KED) | 0.287 ppb             | 12,936 cps        | 1.9 %         |
| 153Eu (KED) | 0.055 ppb             | 5,034 cps         | 1.8 %         |
| 158Gd (KED) | 0.252 ppb             | 15,323 cps        | 2.6 %         |
| 159Tb (KED) | 103.152 %             | 4,392,163 cps     | 1.4 %         |
| 164Dy (KED) | 0.175 ppb             | 12,457 cps        | 4.4 %         |
| 166Er (KED) | 0.084 ppb             | 7,473 cps         | 2.8 %         |
| 169Tm (KED) | 0.011 ppb             | 3,266 cps         | 3.1 %         |
| 174Yb (KED) | 0.065 ppb             | 6,707 cps         | 2.4 %         |
| 175Lu (KED) | -0.007 ppb            | 20,165 cps        | 1.3 %         |
| 205Tl (KED) | 0.026 ppb             | 4,536 cps         | 2.7 %         |
| 208Pb (KED) | 1.650 ppb             | 231,860 cps       | 1.3 %         |
| 209Bi (KED) | 85.645 %              | 3,335,781 cps     | 1.0 %         |
| 232Th (KED) | 0.626 ppb             | 159,799 cps       | 0.4 %         |
| 238U (KED)  | 0.147 ppb             | 43,657 cps        | 0.8 %         |

# Comprehensive

9/30/2021 2:22:41 PM

## Sample Summary

Instrument ID: iCAP Q

Analysis index: 24

Analysis name: 028762(178646)jian

Analysis started at: 9/30/2021 1:38:20 PM

User name: WINDOWS-UPCI4ER\Administrator

| Category    | Concentration average | Concentration RSD |
|-------------|-----------------------|-------------------|
| 6Li (KED)   | 131.988 %             | 3.2 %             |
| 9Be (KED)   | 0.045 ppb             | 50.9 %            |
| 11B (KED)   | -8.495 ppb            | 11.8 %            |
| 24Mg (KED)  | 1,474.177 ppb         | 4.9 %             |
| 27Al (KED)  | 1,424.583 ppb         | 1.5 %             |
| 45Sc (KED)  | 135.997 %             | 1.4 %             |
| 51V (KED)   | 2.628 ppb             | 0.8 %             |
| 52Cr (KED)  | 3.202 ppb             | 0.2 %             |
| 55Mn (KED)  | 38.816 ppb            | 0.6 %             |
| 56Fe (KED)  | 1,660.390 ppb         | 1.0 %             |
| 58Ni (KED)  | 7.575 ppb             | 1.2 %             |
| 59Co (KED)  | 0.733 ppb             | 1.5 %             |
| 63Cu (KED)  | 11.953 ppb            | 0.9 %             |
| 64Zn (KED)  | 145.108 ppb           | 1.0 %             |
| 69Ga (KED)  | 3.073 ppb             | 5.3 %             |
| 75As (KED)  | 0.907 ppb             | 9.7 %             |
| 80Se (KED)  | -0.081 ppb            | 256.7 %           |
| 85Rb (KED)  | 4.551 ppb             | 2.3 %             |
| 88Sr (KED)  | 19.957 ppb            | 1.4 %             |
| 89Y (KED)   | 116.824 %             | 1.1 %             |
| 107Ag (KED) | 0.041 ppb             | 7.4 %             |
| 114Cd (KED) | 0.061 ppb             | 6.9 %             |
| 115In (KED) | 102.680 %             | 1.6 %             |
| 133Cs (KED) | 0.310 ppb             | 4.3 %             |
| 138Ba (KED) | 12.602 ppb            | 1.5 %             |
| 139La (KED) | 1.435 ppb             | 1.4 %             |
| 140Ce (KED) | 2.995 ppb             | 2.7 %             |
| 141Pr (KED) | 0.351 ppb             | 1.6 %             |
| 142Nd (KED) | 1.829 ppb             | 2.1 %             |
| 152Sm (KED) | 0.261 ppb             | 3.2 %             |
| 153Eu (KED) | 0.048 ppb             | 2.6 %             |
| 158Gd (KED) | 0.224 ppb             | 2.4 %             |
| 159Tb (KED) | 100.566 %             | 1.4 %             |
| 164Dy (KED) | 0.152 ppb             | 0.8 %             |
| 166Er (KED) | 0.073 ppb             | 3.1 %             |
| 169Tm (KED) | 0.010 ppb             | 3.3 %             |
| 174Yb (KED) | 0.057 ppb             | 1.9 %             |
| 175Lu (KED) | -0.007 ppb            | 31.1 %            |
| 205Tl (KED) | 0.027 ppb             | 3.1 %             |
| 208Pb (KED) | 1.817 ppb             | 1.7 %             |
| 209Bi (KED) | 81.839 %              | 1.2 %             |
| 232Th (KED) | 0.585 ppb             | 0.9 %             |
| 238U (KED)  | 0.154 ppb             | 0.8 %             |

| Category   | Concentration average | Intensity average | Intensity RSD |
|------------|-----------------------|-------------------|---------------|
| 6Li (KED)  | 131.988 %             | 3,224 cps         | 3.2 %         |
| 9Be (KED)  | 0.045 ppb             | 7 cps             | 50.0 %        |
| 11B (KED)  | -8.495 ppb            | 1,331 cps         | 4.1 %         |
| 24Mg (KED) | 1,474.177 ppb         | 849,970 cps       | 1.8 %         |
| 27Al (KED) | 1,424.583 ppb         | 222,422 cps       | 0.8 %         |

# Comprehensive

9/30/2021 2:22:41 PM

| Category    | Concentration average | Intensity average | Intensity RSD |
|-------------|-----------------------|-------------------|---------------|
| 45Sc (KED)  | 135.997 %             | 52,052 cps        | 1.4 %         |
| 51V (KED)   | 2.628 ppb             | 23,107 cps        | 0.6 %         |
| 52Cr (KED)  | 3.202 ppb             | 44,382 cps        | 1.4 %         |
| 55Mn (KED)  | 38.816 ppb            | 283,200 cps       | 0.8 %         |
| 56Fe (KED)  | 1,660.390 ppb         | 21,019,101 cps    | 1.8 %         |
| 58Ni (KED)  | 7.575 ppb             | 119,461 cps       | 0.9 %         |
| 59Co (KED)  | 0.733 ppb             | 19,515 cps        | 1.6 %         |
| 63Cu (KED)  | 11.953 ppb            | 202,519 cps       | 0.5 %         |
| 64Zn (KED)  | 145.108 ppb           | 662,814 cps       | 0.2 %         |
| 69Ga (KED)  | 3.073 ppb             | 18,539 cps        | 5.1 %         |
| 75As (KED)  | 0.907 ppb             | 1,245 cps         | 8.8 %         |
| 80Se (KED)  | -0.081 ppb            | 1,475 cps         | 4.6 %         |
| 85Rb (KED)  | 4.551 ppb             | 27,486 cps        | 3.4 %         |
| 88Sr (KED)  | 19.957 ppb            | 176,591 cps       | 0.5 %         |
| 89Y (KED)   | 116.824 %             | 455,026 cps       | 1.1 %         |
| 107Ag (KED) | 0.041 ppb             | 2,099 cps         | 5.9 %         |
| 114Cd (KED) | 0.061 ppb             | 1,173 cps         | 7.2 %         |
| 115In (KED) | 102.680 %             | 779,682 cps       | 1.6 %         |
| 133Cs (KED) | 0.310 ppb             | 9,123 cps         | 2.6 %         |
| 138Ba (KED) | 12.602 ppb            | 505,162 cps       | 0.2 %         |
| 139La (KED) | 1.435 ppb             | 116,618 cps       | 2.0 %         |
| 140Ce (KED) | 2.995 ppb             | 323,882 cps       | 1.4 %         |
| 141Pr (KED) | 0.351 ppb             | 40,626 cps        | 1.7 %         |
| 142Nd (KED) | 1.829 ppb             | 85,265 cps        | 1.3 %         |
| 152Sm (KED) | 0.261 ppb             | 11,480 cps        | 4.2 %         |
| 153Eu (KED) | 0.048 ppb             | 4,277 cps         | 3.8 %         |
| 158Gd (KED) | 0.224 ppb             | 13,254 cps        | 2.5 %         |
| 159Tb (KED) | 100.566 %             | 4,282,063 cps     | 1.4 %         |
| 164Dy (KED) | 0.152 ppb             | 10,577 cps        | 1.7 %         |
| 166Er (KED) | 0.073 ppb             | 6,331 cps         | 3.1 %         |
| 169Tm (KED) | 0.010 ppb             | 2,863 cps         | 3.5 %         |
| 174Yb (KED) | 0.057 ppb             | 5,708 cps         | 1.8 %         |
| 175Lu (KED) | -0.007 ppb            | 19,558 cps        | 0.9 %         |
| 205Tl (KED) | 0.027 ppb             | 4,429 cps         | 3.1 %         |
| 208Pb (KED) | 1.817 ppb             | 240,600 cps       | 2.6 %         |
| 209Bi (KED) | 81.839 %              | 3,187,546 cps     | 1.2 %         |
| 232Th (KED) | 0.585 ppb             | 142,846 cps       | 1.6 %         |
| 238U (KED)  | 0.154 ppb             | 43,854 cps        | 1.7 %         |

# Comprehensive

9/30/2021 2:22:41 PM

## Sample Summary

Instrument ID: iCAP Q

Analysis index: 25

Analysis name: 048732(179400)jian

Analysis started at: 9/30/2021 1:42:35 PM

User name: WINDOWS-UPCI4ER\Administrator

| Category    | Concentration average | Concentration RSD |
|-------------|-----------------------|-------------------|
| 6Li (KED)   | 127.619 %             | 4.7 %             |
| 9Be (KED)   | 0.063 ppb             | 82.1 %            |
| 11B (KED)   | -9.175 ppb            | 8.5 %             |
| 24Mg (KED)  | 1,267.834 ppb         | 5.5 %             |
| 27Al (KED)  | 1,600.232 ppb         | 0.6 %             |
| 45Sc (KED)  | 136.000 %             | 1.1 %             |
| 51V (KED)   | 2.725 ppb             | 1.3 %             |
| 52Cr (KED)  | 3.076 ppb             | 2.2 %             |
| 55Mn (KED)  | 36.076 ppb            | 2.1 %             |
| 56Fe (KED)  | 1,605.627 ppb         | 1.5 %             |
| 58Ni (KED)  | 6.646 ppb             | 2.4 %             |
| 59Co (KED)  | 0.661 ppb             | 2.2 %             |
| 63Cu (KED)  | 12.316 ppb            | 1.2 %             |
| 64Zn (KED)  | 150.234 ppb           | 1.8 %             |
| 69Ga (KED)  | 3.039 ppb             | 0.4 %             |
| 75As (KED)  | 0.838 ppb             | 6.6 %             |
| 80Se (KED)  | -0.137 ppb            | 142.0 %           |
| 85Rb (KED)  | 3.430 ppb             | 0.4 %             |
| 88Sr (KED)  | 17.998 ppb            | 2.1 %             |
| 89Y (KED)   | 116.184 %             | 0.7 %             |
| 107Ag (KED) | 0.083 ppb             | 1.2 %             |
| 114Cd (KED) | 0.051 ppb             | 11.0 %            |
| 115In (KED) | 101.734 %             | 0.8 %             |
| 133Cs (KED) | 0.327 ppb             | 2.3 %             |
| 138Ba (KED) | 12.170 ppb            | 2.0 %             |
| 139La (KED) | 1.354 ppb             | 1.8 %             |
| 140Ce (KED) | 2.878 ppb             | 0.8 %             |
| 141Pr (KED) | 0.334 ppb             | 2.0 %             |
| 142Nd (KED) | 1.754 ppb             | 2.4 %             |
| 152Sm (KED) | 0.248 ppb             | 2.3 %             |
| 153Eu (KED) | 0.046 ppb             | 2.7 %             |
| 158Gd (KED) | 0.209 ppb             | 2.3 %             |
| 159Tb (KED) | 98.891 %              | 2.1 %             |
| 164Dy (KED) | 0.146 ppb             | 4.6 %             |
| 166Er (KED) | 0.073 ppb             | 4.8 %             |
| 169Tm (KED) | 0.009 ppb             | 4.9 %             |
| 174Yb (KED) | 0.055 ppb             | 3.2 %             |
| 175Lu (KED) | -0.012 ppb            | 16.7 %            |
| 205Tl (KED) | 0.023 ppb             | 3.2 %             |
| 208Pb (KED) | 1.609 ppb             | 1.8 %             |
| 209Bi (KED) | 81.739 %              | 0.5 %             |
| 232Th (KED) | 0.532 ppb             | 2.7 %             |
| 238U (KED)  | 0.131 ppb             | 1.6 %             |

| Category   | Concentration average | Intensity average | Intensity RSD |
|------------|-----------------------|-------------------|---------------|
| 6Li (KED)  | 127.619 %             | 3,117 cps         | 4.7 %         |
| 9Be (KED)  | 0.063 ppb             | 9 cps             | 78.1 %        |
| 11B (KED)  | -9.175 ppb            | 1,233 cps         | 3.4 %         |
| 24Mg (KED) | 1,267.834 ppb         | 706,463 cps       | 1.0 %         |
| 27Al (KED) | 1,600.232 ppb         | 249,844 cps       | 0.6 %         |

# Comprehensive

9/30/2021 2:22:41 PM

| Category    | Concentration average | Intensity average | Intensity RSD |
|-------------|-----------------------|-------------------|---------------|
| 45Sc (KED)  | 136.000 %             | 52,053 cps        | 1.1 %         |
| 51V (KED)   | 2.725 ppb             | 23,960 cps        | 1.7 %         |
| 52Cr (KED)  | 3.076 ppb             | 42,645 cps        | 1.2 %         |
| 55Mn (KED)  | 36.076 ppb            | 263,228 cps       | 1.2 %         |
| 56Fe (KED)  | 1,605.627 ppb         | 20,325,180 cps    | 1.3 %         |
| 58Ni (KED)  | 6.646 ppb             | 104,873 cps       | 1.4 %         |
| 59Co (KED)  | 0.661 ppb             | 17,611 cps        | 1.3 %         |
| 63Cu (KED)  | 12.316 ppb            | 207,515 cps       | 1.2 %         |
| 64Zn (KED)  | 150.234 ppb           | 682,384 cps       | 1.1 %         |
| 69Ga (KED)  | 3.039 ppb             | 18,238 cps        | 0.5 %         |
| 75As (KED)  | 0.838 ppb             | 1,146 cps         | 5.7 %         |
| 80Se (KED)  | -0.137 ppb            | 1,445 cps         | 4.9 %         |
| 85Rb (KED)  | 3.430 ppb             | 20,610 cps        | 1.1 %         |
| 88Sr (KED)  | 17.998 ppb            | 158,421 cps       | 1.7 %         |
| 89Y (KED)   | 116.184 %             | 452,532 cps       | 0.7 %         |
| 107Ag (KED) | 0.083 ppb             | 4,070 cps         | 1.2 %         |
| 114Cd (KED) | 0.051 ppb             | 977 cps           | 9.4 %         |
| 115In (KED) | 101.734 %             | 772,496 cps       | 0.8 %         |
| 133Cs (KED) | 0.327 ppb             | 9,537 cps         | 1.4 %         |
| 138Ba (KED) | 12.170 ppb            | 479,744 cps       | 0.5 %         |
| 139La (KED) | 1.354 ppb             | 108,191 cps       | 3.0 %         |
| 140Ce (KED) | 2.878 ppb             | 306,134 cps       | 1.4 %         |
| 141Pr (KED) | 0.334 ppb             | 37,965 cps        | 0.1 %         |
| 142Nd (KED) | 1.754 ppb             | 80,403 cps        | 1.0 %         |
| 152Sm (KED) | 0.248 ppb             | 10,726 cps        | 0.9 %         |
| 153Eu (KED) | 0.046 ppb             | 4,046 cps         | 4.8 %         |
| 158Gd (KED) | 0.209 ppb             | 12,140 cps        | 0.4 %         |
| 159Tb (KED) | 98.891 %              | 4,210,742 cps     | 2.1 %         |
| 164Dy (KED) | 0.146 ppb             | 9,953 cps         | 2.7 %         |
| 166Er (KED) | 0.073 ppb             | 6,208 cps         | 2.9 %         |
| 169Tm (KED) | 0.009 ppb             | 2,536 cps         | 4.0 %         |
| 174Yb (KED) | 0.055 ppb             | 5,433 cps         | 1.0 %         |
| 175Lu (KED) | -0.012 ppb            | 18,413 cps        | 0.6 %         |
| 205Tl (KED) | 0.023 ppb             | 3,864 cps         | 3.1 %         |
| 208Pb (KED) | 1.609 ppb             | 216,668 cps       | 1.3 %         |
| 209Bi (KED) | 81.739 %              | 3,183,627 cps     | 0.5 %         |
| 232Th (KED) | 0.532 ppb             | 129,937 cps       | 2.4 %         |
| 238U (KED)  | 0.131 ppb             | 37,297 cps        | 1.8 %         |

# Comprehensive

9/30/2021 2:22:41 PM

## Sample Summary

Instrument ID: iCAP Q

Analysis index: 26

Analysis name: 047672(179380)jian

Analysis started at: 9/30/2021 1:46:34 PM

User name: WINDOWS-UPCI4ER\Administrator

| Category    | Concentration average | Concentration RSD |
|-------------|-----------------------|-------------------|
| 6Li (KED)   | 132.807 %             |                   |
| 9Be (KED)   | 0.067 ppb             |                   |
| 11B (KED)   | -15.326 ppb           |                   |
| 24Mg (KED)  | 1,424.514 ppb         |                   |
| 27Al (KED)  | 1,706.131 ppb         |                   |
| 45Sc (KED)  | 133.365 %             |                   |
| 51V (KED)   | 3.164 ppb             |                   |
| 52Cr (KED)  | 4.383 ppb             |                   |
| 55Mn (KED)  | 43.749 ppb            |                   |
| 56Fe (KED)  | 1,969.496 ppb         |                   |
| 58Ni (KED)  | 8.565 ppb             |                   |
| 59Co (KED)  | 0.834 ppb             |                   |
| 63Cu (KED)  | 12.065 ppb            |                   |
| 64Zn (KED)  | 157.897 ppb           |                   |
| 69Ga (KED)  | 3.423 ppb             |                   |
| 75As (KED)  | 1.014 ppb             |                   |
| 80Se (KED)  | 0.115 ppb             |                   |
| 85Rb (KED)  | 4.414 ppb             |                   |
| 88Sr (KED)  | 21.754 ppb            |                   |
| 89Y (KED)   | 115.701 %             |                   |
| 107Ag (KED) | 0.048 ppb             |                   |
| 114Cd (KED) | 0.045 ppb             |                   |
| 115In (KED) | 101.432 %             |                   |
| 133Cs (KED) | 0.371 ppb             |                   |
| 138Ba (KED) | 13.830 ppb            |                   |
| 139La (KED) | 1.898 ppb             |                   |
| 140Ce (KED) | 3.719 ppb             |                   |
| 141Pr (KED) | 0.423 ppb             |                   |
| 142Nd (KED) | 2.202 ppb             |                   |
| 152Sm (KED) | 0.304 ppb             |                   |
| 153Eu (KED) | 0.059 ppb             |                   |
| 158Gd (KED) | 0.263 ppb             |                   |
| 159Tb (KED) | 98.113 %              |                   |
| 164Dy (KED) | 0.179 ppb             |                   |
| 166Er (KED) | 0.088 ppb             |                   |
| 169Tm (KED) | 0.011 ppb             |                   |
| 174Yb (KED) | 0.064 ppb             |                   |
| 175Lu (KED) | -0.010 ppb            |                   |
| 205Tl (KED) | 0.026 ppb             |                   |
| 208Pb (KED) | 1.722 ppb             |                   |
| 209Bi (KED) | 80.575 %              |                   |
| 232Th (KED) | 0.683 ppb             |                   |
| 238U (KED)  | 0.144 ppb             |                   |

| Category   | Concentration average | Intensity average | Intensity RSD |
|------------|-----------------------|-------------------|---------------|
| 6Li (KED)  | 132.807 %             | 3,244 cps         |               |
| 9Be (KED)  | 0.067 ppb             | 10 cps            |               |
| 11B (KED)  | -15.326 ppb           | 780 cps           |               |
| 24Mg (KED) | 1,424.514 ppb         | 827,320 cps       |               |
| 27Al (KED) | 1,706.131 ppb         | 261,215 cps       |               |

# Comprehensive

9/30/2021 2:22:41 PM

| Category    | Concentration average | Intensity average | Intensity RSD |
|-------------|-----------------------|-------------------|---------------|
| 45Sc (KED)  | 133.365 %             | 51,044 cps        |               |
| 51V (KED)   | 3.164 ppb             | 27,273 cps        |               |
| 52Cr (KED)  | 4.383 ppb             | 59,485 cps        |               |
| 55Mn (KED)  | 43.749 ppb            | 312,949 cps       |               |
| 56Fe (KED)  | 1,969.496 ppb         | 24,447,531 cps    |               |
| 58Ni (KED)  | 8.565 ppb             | 132,392 cps       |               |
| 59Co (KED)  | 0.834 ppb             | 21,762 cps        |               |
| 63Cu (KED)  | 12.065 ppb            | 202,461 cps       |               |
| 64Zn (KED)  | 157.897 ppb           | 714,162 cps       |               |
| 69Ga (KED)  | 3.423 ppb             | 20,443 cps        |               |
| 75As (KED)  | 1.014 ppb             | 1,377 cps         |               |
| 80Se (KED)  | 0.115 ppb             | 1,540 cps         |               |
| 85Rb (KED)  | 4.414 ppb             | 26,401 cps        |               |
| 88Sr (KED)  | 21.754 ppb            | 190,644 cps       |               |
| 89Y (KED)   | 115.701 %             | 450,652 cps       |               |
| 107Ag (KED) | 0.048 ppb             | 2,400 cps         |               |
| 114Cd (KED) | 0.045 ppb             | 870 cps           |               |
| 115In (KED) | 101.432 %             | 770,208 cps       |               |
| 133Cs (KED) | 0.371 ppb             | 10,768 cps        |               |
| 138Ba (KED) | 13.830 ppb            | 540,725 cps       |               |
| 139La (KED) | 1.898 ppb             | 150,475 cps       |               |
| 140Ce (KED) | 3.719 ppb             | 392,452 cps       |               |
| 141Pr (KED) | 0.423 ppb             | 47,718 cps        |               |
| 142Nd (KED) | 2.202 ppb             | 100,137 cps       |               |
| 152Sm (KED) | 0.304 ppb             | 13,023 cps        |               |
| 153Eu (KED) | 0.059 ppb             | 5,094 cps         |               |
| 158Gd (KED) | 0.263 ppb             | 15,169 cps        |               |
| 159Tb (KED) | 98.113 %              | 4,177,623 cps     |               |
| 164Dy (KED) | 0.179 ppb             | 12,113 cps        |               |
| 166Er (KED) | 0.088 ppb             | 7,402 cps         |               |
| 169Tm (KED) | 0.011 ppb             | 3,114 cps         |               |
| 174Yb (KED) | 0.064 ppb             | 6,225 cps         |               |
| 175Lu (KED) | -0.010 ppb            | 18,657 cps        |               |
| 205Tl (KED) | 0.026 ppb             | 4,194 cps         |               |
| 208Pb (KED) | 1.722 ppb             | 226,235 cps       |               |
| 209Bi (KED) | 80.575 %              | 3,138,290 cps     |               |
| 232Th (KED) | 0.683 ppb             | 164,031 cps       |               |
| 238U (KED)  | 0.144 ppb             | 40,218 cps        |               |

# Comprehensive

9/30/2021 2:22:41 PM

## Sample Summary

Instrument ID: iCAP Q

Analysis index: 27

Analysis name: 028423(178578)jian

Analysis started at: 9/30/2021 1:49:16 PM

User name: WINDOWS-UPCI4ER\Administrator

| Category    | Concentration average | Concentration RSD |
|-------------|-----------------------|-------------------|
| 6Li (KED)   | 132.397 %             |                   |
| 9Be (KED)   | 0.022 ppb             |                   |
| 11B (KED)   | -19.451 ppb           |                   |
| 24Mg (KED)  | 922.732 ppb           |                   |
| 27Al (KED)  | 1,353.489 ppb         |                   |
| 45Sc (KED)  | 132.595 %             |                   |
| 51V (KED)   | 2.329 ppb             |                   |
| 52Cr (KED)  | 3.021 ppb             |                   |
| 55Mn (KED)  | 30.985 ppb            |                   |
| 56Fe (KED)  | 1,355.080 ppb         |                   |
| 58Ni (KED)  | 5.733 ppb             |                   |
| 59Co (KED)  | 0.564 ppb             |                   |
| 63Cu (KED)  | 9.481 ppb             |                   |
| 64Zn (KED)  | 148.256 ppb           |                   |
| 69Ga (KED)  | 2.333 ppb             |                   |
| 75As (KED)  | 0.763 ppb             |                   |
| 80Se (KED)  | -0.135 ppb            |                   |
| 85Rb (KED)  | 3.117 ppb             |                   |
| 88Sr (KED)  | 15.207 ppb            |                   |
| 89Y (KED)   | 116.818 %             |                   |
| 107Ag (KED) | 0.079 ppb             |                   |
| 114Cd (KED) | 0.043 ppb             |                   |
| 115In (KED) | 104.503 %             |                   |
| 133Cs (KED) | 0.263 ppb             |                   |
| 138Ba (KED) | 9.489 ppb             |                   |
| 139La (KED) | 1.181 ppb             |                   |
| 140Ce (KED) | 2.390 ppb             |                   |
| 141Pr (KED) | 0.289 ppb             |                   |
| 142Nd (KED) | 1.513 ppb             |                   |
| 152Sm (KED) | 0.216 ppb             |                   |
| 153Eu (KED) | 0.039 ppb             |                   |
| 158Gd (KED) | 0.182 ppb             |                   |
| 159Tb (KED) | 102.488 %             |                   |
| 164Dy (KED) | 0.126 ppb             |                   |
| 166Er (KED) | 0.056 ppb             |                   |
| 169Tm (KED) | 0.007 ppb             |                   |
| 174Yb (KED) | 0.049 ppb             |                   |
| 175Lu (KED) | -0.013 ppb            |                   |
| 205Tl (KED) | 0.019 ppb             |                   |
| 208Pb (KED) | 1.576 ppb             |                   |
| 209Bi (KED) | 83.435 %              |                   |
| 232Th (KED) | 0.443 ppb             |                   |
| 238U (KED)  | 0.106 ppb             |                   |

| Category   | Concentration average | Intensity average | Intensity RSD |
|------------|-----------------------|-------------------|---------------|
| 6Li (KED)  | 132.397 %             | 3,234 cps         |               |
| 9Be (KED)  | 0.022 ppb             | 3 cps             |               |
| 11B (KED)  | -19.451 ppb           | 440 cps           |               |
| 24Mg (KED) | 922.732 ppb           | 534,521 cps       |               |
| 27Al (KED) | 1,353.489 ppb         | 206,069 cps       |               |

# Comprehensive

9/30/2021 2:22:41 PM

| Category    | Concentration average | Intensity average | Intensity RSD |
|-------------|-----------------------|-------------------|---------------|
| 45Sc (KED)  | 132.595 %             | 50,750 cps        |               |
| 51V (KED)   | 2.329 ppb             | 19,966 cps        |               |
| 52Cr (KED)  | 3.021 ppb             | 40,850 cps        |               |
| 55Mn (KED)  | 30.985 ppb            | 220,545 cps       |               |
| 56Fe (KED)  | 1,355.080 ppb         | 16,726,684 cps    |               |
| 58Ni (KED)  | 5.733 ppb             | 88,298 cps        |               |
| 59Co (KED)  | 0.564 ppb             | 14,662 cps        |               |
| 63Cu (KED)  | 9.481 ppb             | 160,832 cps       |               |
| 64Zn (KED)  | 148.256 ppb           | 677,159 cps       |               |
| 69Ga (KED)  | 2.333 ppb             | 14,105 cps        |               |
| 75As (KED)  | 0.763 ppb             | 1,050 cps         |               |
| 80Se (KED)  | -0.135 ppb            | 1,453 cps         |               |
| 85Rb (KED)  | 3.117 ppb             | 18,834 cps        |               |
| 88Sr (KED)  | 15.207 ppb            | 134,636 cps       |               |
| 89Y (KED)   | 116.818 %             | 455,001 cps       |               |
| 107Ag (KED) | 0.079 ppb             | 3,971 cps         |               |
| 114Cd (KED) | 0.043 ppb             | 867 cps           |               |
| 115In (KED) | 104.503 %             | 793,527 cps       |               |
| 133Cs (KED) | 0.263 ppb             | 7,879 cps         |               |
| 138Ba (KED) | 9.489 ppb             | 388,309 cps       |               |
| 139La (KED) | 1.181 ppb             | 97,802 cps        |               |
| 140Ce (KED) | 2.390 ppb             | 263,618 cps       |               |
| 141Pr (KED) | 0.289 ppb             | 34,090 cps        |               |
| 142Nd (KED) | 1.513 ppb             | 71,893 cps        |               |
| 152Sm (KED) | 0.216 ppb             | 9,687 cps         |               |
| 153Eu (KED) | 0.039 ppb             | 3,557 cps         |               |
| 158Gd (KED) | 0.182 ppb             | 11,012 cps        |               |
| 159Tb (KED) | 102.488 %             | 4,363,891 cps     |               |
| 164Dy (KED) | 0.126 ppb             | 8,920 cps         |               |
| 166Er (KED) | 0.056 ppb             | 5,001 cps         |               |
| 169Tm (KED) | 0.007 ppb             | 2,110 cps         |               |
| 174Yb (KED) | 0.049 ppb             | 5,001 cps         |               |
| 175Lu (KED) | -0.013 ppb            | 18,861 cps        |               |
| 205Tl (KED) | 0.019 ppb             | 3,157 cps         |               |
| 208Pb (KED) | 1.576 ppb             | 217,370 cps       |               |
| 209Bi (KED) | 83.435 %              | 3,249,689 cps     |               |
| 232Th (KED) | 0.443 ppb             | 110,971 cps       |               |
| 238U (KED)  | 0.106 ppb             | 31,176 cps        |               |

# Comprehensive

9/30/2021 2:22:41 PM

## Sample Summary

Instrument ID: iCAP Q

Analysis index: 28

Analysis name: 178600jian

Analysis started at: 9/30/2021 1:51:58 PM

User name: WINDOWS-UPCI4ER\Administrator

| Category    | Concentration average | Concentration RSD |
|-------------|-----------------------|-------------------|
| 6Li (KED)   | 124.343 %             |                   |
| 9Be (KED)   | 0.024 ppb             |                   |
| 11B (KED)   | -14.722 ppb           |                   |
| 24Mg (KED)  | 1,403.636 ppb         |                   |
| 27Al (KED)  | 1,563.503 ppb         |                   |
| 45Sc (KED)  | 129.998 %             |                   |
| 51V (KED)   | 2.927 ppb             |                   |
| 52Cr (KED)  | 4.023 ppb             |                   |
| 55Mn (KED)  | 38.951 ppb            |                   |
| 56Fe (KED)  | 1,802.980 ppb         |                   |
| 58Ni (KED)  | 8.088 ppb             |                   |
| 59Co (KED)  | 0.789 ppb             |                   |
| 63Cu (KED)  | 10.899 ppb            |                   |
| 64Zn (KED)  | 152.178 ppb           |                   |
| 69Ga (KED)  | 5.389 ppb             |                   |
| 75As (KED)  | 0.856 ppb             |                   |
| 80Se (KED)  | -0.367 ppb            |                   |
| 85Rb (KED)  | 4.250 ppb             |                   |
| 88Sr (KED)  | 18.385 ppb            |                   |
| 89Y (KED)   | 116.614 %             |                   |
| 107Ag (KED) | 0.090 ppb             |                   |
| 114Cd (KED) | 0.050 ppb             |                   |
| 115In (KED) | 102.133 %             |                   |
| 133Cs (KED) | 0.343 ppb             |                   |
| 138Ba (KED) | 23.403 ppb            |                   |
| 139La (KED) | 1.528 ppb             |                   |
| 140Ce (KED) | 3.060 ppb             |                   |
| 141Pr (KED) | 0.370 ppb             |                   |
| 142Nd (KED) | 1.916 ppb             |                   |
| 152Sm (KED) | 0.277 ppb             |                   |
| 153Eu (KED) | 0.052 ppb             |                   |
| 158Gd (KED) | 0.235 ppb             |                   |
| 159Tb (KED) | 102.443 %             |                   |
| 164Dy (KED) | 0.171 ppb             |                   |
| 166Er (KED) | 0.077 ppb             |                   |
| 169Tm (KED) | 0.010 ppb             |                   |
| 174Yb (KED) | 0.059 ppb             |                   |
| 175Lu (KED) | -0.011 ppb            |                   |
| 205Tl (KED) | 0.025 ppb             |                   |
| 208Pb (KED) | 1.873 ppb             |                   |
| 209Bi (KED) | 82.498 %              |                   |
| 232Th (KED) | 0.619 ppb             |                   |
| 238U (KED)  | 0.141 ppb             |                   |

| Category   | Concentration average | Intensity average | Intensity RSD |
|------------|-----------------------|-------------------|---------------|
| 6Li (KED)  | 124.343 %             | 3,037 cps         |               |
| 9Be (KED)  | 0.024 ppb             | 3 cps             |               |
| 11B (KED)  | -14.722 ppb           | 777 cps           |               |
| 24Mg (KED) | 1,403.636 ppb         | 763,255 cps       |               |
| 27Al (KED) | 1,563.503 ppb         | 233,351 cps       |               |

# Comprehensive

9/30/2021 2:22:41 PM

| Category    | Concentration average | Intensity average | Intensity RSD |
|-------------|-----------------------|-------------------|---------------|
| 45Sc (KED)  | 129.998 %             | 49,756 cps        |               |
| 51V (KED)   | 2.927 ppb             | 24,598 cps        |               |
| 52Cr (KED)  | 4.023 ppb             | 53,247 cps        |               |
| 55Mn (KED)  | 38.951 ppb            | 271,660 cps       |               |
| 56Fe (KED)  | 1,802.980 ppb         | 21,816,353 cps    |               |
| 58Ni (KED)  | 8.088 ppb             | 121,895 cps       |               |
| 59Co (KED)  | 0.789 ppb             | 20,089 cps        |               |
| 63Cu (KED)  | 10.899 ppb            | 184,422 cps       |               |
| 64Zn (KED)  | 152.178 ppb           | 693,802 cps       |               |
| 69Ga (KED)  | 5.389 ppb             | 32,389 cps        |               |
| 75As (KED)  | 0.856 ppb             | 1,173 cps         |               |
| 80Se (KED)  | -0.367 ppb            | 1,357 cps         |               |
| 85Rb (KED)  | 4.250 ppb             | 25,623 cps        |               |
| 88Sr (KED)  | 18.385 ppb            | 162,433 cps       |               |
| 89Y (KED)   | 116.614 %             | 454,208 cps       |               |
| 107Ag (KED) | 0.090 ppb             | 4,417 cps         |               |
| 114Cd (KED) | 0.050 ppb             | 977 cps           |               |
| 115In (KED) | 102.133 %             | 775,528 cps       |               |
| 133Cs (KED) | 0.343 ppb             | 10,044 cps        |               |
| 138Ba (KED) | 23.403 ppb            | 953,729 cps       |               |
| 139La (KED) | 1.528 ppb             | 126,528 cps       |               |
| 140Ce (KED) | 3.060 ppb             | 337,252 cps       |               |
| 141Pr (KED) | 0.370 ppb             | 43,643 cps        |               |
| 142Nd (KED) | 1.916 ppb             | 90,984 cps        |               |
| 152Sm (KED) | 0.277 ppb             | 12,416 cps        |               |
| 153Eu (KED) | 0.052 ppb             | 4,724 cps         |               |
| 158Gd (KED) | 0.235 ppb             | 14,181 cps        |               |
| 159Tb (KED) | 102.443 %             | 4,361,976 cps     |               |
| 164Dy (KED) | 0.171 ppb             | 12,053 cps        |               |
| 166Er (KED) | 0.077 ppb             | 6,782 cps         |               |
| 169Tm (KED) | 0.010 ppb             | 2,910 cps         |               |
| 174Yb (KED) | 0.059 ppb             | 6,045 cps         |               |
| 175Lu (KED) | -0.011 ppb            | 19,218 cps        |               |
| 205Tl (KED) | 0.025 ppb             | 4,111 cps         |               |
| 208Pb (KED) | 1.873 ppb             | 248,930 cps       |               |
| 209Bi (KED) | 82.498 %              | 3,213,185 cps     |               |
| 232Th (KED) | 0.619 ppb             | 152,357 cps       |               |
| 238U (KED)  | 0.141 ppb             | 40,392 cps        |               |

# Comprehensive

9/30/2021 2:22:41 PM

## Sample Summary

Instrument ID: iCAP Q

Analysis index: 29

Analysis name: 14ti

Analysis started at: 9/30/2021 1:54:54 PM

User name: WINDOWS-UPCI4ER\Administrator

| Category    | Concentration average | Concentration RSD |
|-------------|-----------------------|-------------------|
| 6Li (KED)   | 127.346 %             |                   |
| 9Be (KED)   | 0.000 ppb             |                   |
| 11B (KED)   | -17.671 ppb           |                   |
| 24Mg (KED)  | 505.798 ppb           |                   |
| 27Al (KED)  | 468.648 ppb           |                   |
| 45Sc (KED)  | 127.655 %             |                   |
| 51V (KED)   | 0.807 ppb             |                   |
| 52Cr (KED)  | 1.499 ppb             |                   |
| 55Mn (KED)  | 13.230 ppb            |                   |
| 56Fe (KED)  | 517.055 ppb           |                   |
| 58Ni (KED)  | 2.300 ppb             |                   |
| 59Co (KED)  | 0.226 ppb             |                   |
| 63Cu (KED)  | 10.293 ppb            |                   |
| 64Zn (KED)  | 156.015 ppb           |                   |
| 69Ga (KED)  | 1.511 ppb             |                   |
| 75As (KED)  | 0.249 ppb             |                   |
| 80Se (KED)  | 0.345 ppb             |                   |
| 85Rb (KED)  | 4.577 ppb             |                   |
| 88Sr (KED)  | 6.783 ppb             |                   |
| 89Y (KED)   | 114.372 %             |                   |
| 107Ag (KED) | 0.031 ppb             |                   |
| 114Cd (KED) | 0.038 ppb             |                   |
| 115In (KED) | 105.268 %             |                   |
| 133Cs (KED) | 0.085 ppb             |                   |
| 138Ba (KED) | 6.339 ppb             |                   |
| 139La (KED) | 0.430 ppb             |                   |
| 140Ce (KED) | 0.888 ppb             |                   |
| 141Pr (KED) | 0.102 ppb             |                   |
| 142Nd (KED) | 0.535 ppb             |                   |
| 152Sm (KED) | 0.076 ppb             |                   |
| 153Eu (KED) | 0.013 ppb             |                   |
| 158Gd (KED) | 0.066 ppb             |                   |
| 159Tb (KED) | 107.331 %             |                   |
| 164Dy (KED) | 0.045 ppb             |                   |
| 166Er (KED) | 0.022 ppb             |                   |
| 169Tm (KED) | 0.003 ppb             |                   |
| 174Yb (KED) | 0.018 ppb             |                   |
| 175Lu (KED) | -0.017 ppb            |                   |
| 205Tl (KED) | 0.009 ppb             |                   |
| 208Pb (KED) | 0.555 ppb             |                   |
| 209Bi (KED) | 88.400 %              |                   |
| 232Th (KED) | 0.128 ppb             |                   |
| 238U (KED)  | 0.029 ppb             |                   |

| Category   | Concentration average | Intensity average | Intensity RSD |
|------------|-----------------------|-------------------|---------------|
| 6Li (KED)  | 127.346 %             | 3,110 cps         |               |
| 9Be (KED)  | 0.000 ppb             | 0 cps             |               |
| 11B (KED)  | -17.671 ppb           | 563 cps           |               |
| 24Mg (KED) | 505.798 ppb           | 282,160 cps       |               |
| 27Al (KED) | 468.648 ppb           | 68,819 cps        |               |

# Comprehensive

9/30/2021 2:22:41 PM

| Category    | Concentration average | Intensity average | Intensity RSD |
|-------------|-----------------------|-------------------|---------------|
| 45Sc (KED)  | 127.655 %             | 48,859 cps        |               |
| 51V (KED)   | 0.807 ppb             | 6,678 cps         |               |
| 52Cr (KED)  | 1.499 ppb             | 19,625 cps        |               |
| 55Mn (KED)  | 13.230 ppb            | 90,994 cps        |               |
| 56Fe (KED)  | 517.055 ppb           | 6,150,426 cps     |               |
| 58Ni (KED)  | 2.300 ppb             | 34,431 cps        |               |
| 59Co (KED)  | 0.226 ppb             | 5,708 cps         |               |
| 63Cu (KED)  | 10.293 ppb            | 170,871 cps       |               |
| 64Zn (KED)  | 156.015 ppb           | 697,571 cps       |               |
| 69Ga (KED)  | 1.511 ppb             | 8,977 cps         |               |
| 75As (KED)  | 0.249 ppb             | 347 cps           |               |
| 80Se (KED)  | 0.345 ppb             | 1,613 cps         |               |
| 85Rb (KED)  | 4.577 ppb             | 27,063 cps        |               |
| 88Sr (KED)  | 6.783 ppb             | 58,945 cps        |               |
| 89Y (KED)   | 114.372 %             | 445,475 cps       |               |
| 107Ag (KED) | 0.031 ppb             | 1,657 cps         |               |
| 114Cd (KED) | 0.038 ppb             | 780 cps           |               |
| 115In (KED) | 105.268 %             | 799,334 cps       |               |
| 133Cs (KED) | 0.085 ppb             | 2,617 cps         |               |
| 138Ba (KED) | 6.339 ppb             | 272,498 cps       |               |
| 139La (KED) | 0.430 ppb             | 37,389 cps        |               |
| 140Ce (KED) | 0.888 ppb             | 102,902 cps       |               |
| 141Pr (KED) | 0.102 ppb             | 12,640 cps        |               |
| 142Nd (KED) | 0.535 ppb             | 26,689 cps        |               |
| 152Sm (KED) | 0.076 ppb             | 3,574 cps         |               |
| 153Eu (KED) | 0.013 ppb             | 1,287 cps         |               |
| 158Gd (KED) | 0.066 ppb             | 4,214 cps         |               |
| 159Tb (KED) | 107.331 %             | 4,570,088 cps     |               |
| 164Dy (KED) | 0.045 ppb             | 3,364 cps         |               |
| 166Er (KED) | 0.022 ppb             | 2,240 cps         |               |
| 169Tm (KED) | 0.003 ppb             | 933 cps           |               |
| 174Yb (KED) | 0.018 ppb             | 1,960 cps         |               |
| 175Lu (KED) | -0.017 ppb            | 19,158 cps        |               |
| 205Tl (KED) | 0.009 ppb             | 1,617 cps         |               |
| 208Pb (KED) | 0.555 ppb             | 105,185 cps       |               |
| 209Bi (KED) | 88.400 %              | 3,443,076 cps     |               |
| 232Th (KED) | 0.128 ppb             | 35,761 cps        |               |
| 238U (KED)  | 0.029 ppb             | 9,907 cps         |               |
