# Supplementary material for: Geographic and breed-specific traceability of cashmere via mineral element profiling in Inner Mongolia (Ordos, Chifeng, and Alxa League)
Source: Royal Society of Chemistry journal article supplement (doi:10.1039/d5ra08122j), 2026-01-01
Supplement: d5ra08122j1.zip [file 20210930-a you qi ya bu lai zhen(4-6).pdf › ԭʼ޿/20210930-a you qi ya bu lai zhen(4-6).pdf]

## Instrument Summary:

Instrument ID: iCAP Q  
Serial Number: Undefined

## Labbook Summary:

Path and filename: \_Application Data\Workspace\LabBooks\wlw\20210930-2.imexp  
Labbook created by: Administrator  
Based on template:  
Hardware configuration: iCAPQ1  
Labbook type: eQuant  
Qtegra version (last saved): 2.7.2425.154  
Labbook started: 9/30/2021 2:27:20 PM  
Labbook finished: 9/30/2021 3:03:58 PM

## Method Summary:

| Isotope     | Mode | Dwell time (s) | # of Channels | Spacing | Resolution | IS          |
|-------------|------|----------------|---------------|---------|------------|-------------|
| 6Li (KED)   | KED  | 0.03           | 3             | 0.1     | Normal     |             |
| 9Be (KED)   | KED  | 0.03           | 3             | 0.1     | Normal     | 6Li (KED)   |
| 11B (KED)   | KED  | 0.03           | 3             | 0.1     | Normal     | 6Li (KED)   |
| 24Mg (KED)  | KED  | 0.03           | 3             | 0.1     | Normal     | 6Li (KED)   |
| 27Al (KED)  | KED  | 0.03           | 3             | 0.1     | Normal     | 45Sc (KED)  |
| 45Sc (KED)  | KED  | 0.03           | 3             | 0.1     | Normal     |             |
| 51V (KED)   | KED  | 0.03           | 3             | 0.1     | Normal     | 45Sc (KED)  |
| 52Cr (KED)  | KED  | 0.03           | 3             | 0.1     | Normal     | 45Sc (KED)  |
| 55Mn (KED)  | KED  | 0.03           | 3             | 0.1     | Normal     | 45Sc (KED)  |
| 56Fe (KED)  | KED  | 0.03           | 3             | 0.1     | Normal     | 45Sc (KED)  |
| 58Ni (KED)  | KED  | 0.03           | 3             | 0.1     | Normal     | 45Sc (KED)  |
| 59Co (KED)  | KED  | 0.03           | 3             | 0.1     | Normal     | 45Sc (KED)  |
| 63Cu (KED)  | KED  | 0.03           | 3             | 0.1     | Normal     | 89Y (KED)   |
| 64Zn (KED)  | KED  | 0.03           | 3             | 0.1     | Normal     | 89Y (KED)   |
| 69Ga (KED)  | KED  | 0.03           | 3             | 0.1     | Normal     | 89Y (KED)   |
| 75As (KED)  | KED  | 0.03           | 3             | 0.1     | Normal     | 89Y (KED)   |
| 80Se (KED)  | KED  | 0.03           | 3             | 0.1     | Normal     | 89Y (KED)   |
| 85Rb (KED)  | KED  | 0.03           | 3             | 0.1     | Normal     | 89Y (KED)   |
| 88Sr (KED)  | KED  | 0.03           | 3             | 0.1     | Normal     | 89Y (KED)   |
| 89Y (KED)   | KED  | 0.03           | 3             | 0.1     | Normal     |             |
| 107Ag (KED) | KED  | 0.03           | 3             | 0.1     | Normal     | 115In (KED) |
| 114Cd (KED) | KED  | 0.03           | 3             | 0.1     | Normal     | 115In (KED) |
| 115In (KED) | KED  | 0.03           | 3             | 0.1     | Normal     |             |
| 133Cs (KED) | KED  | 0.03           | 3             | 0.1     | Normal     | 115In (KED) |
| 138Ba (KED) | KED  | 0.03           | 3             | 0.1     | Normal     | 159Tb (KED) |
| 139La (KED) | KED  | 0.03           | 3             | 0.1     | Normal     | 159Tb (KED) |
| 140Ce (KED) | KED  | 0.03           | 3             | 0.1     | Normal     | 159Tb (KED) |
| 141Pr (KED) | KED  | 0.03           | 3             | 0.1     | Normal     | 159Tb (KED) |
| 142Nd (KED) | KED  | 0.03           | 3             | 0.1     | Normal     | 159Tb (KED) |
| 152Sm (KED) | KED  | 0.03           | 3             | 0.1     | Normal     | 159Tb (KED) |
| 153Eu (KED) | KED  | 0.03           | 3             | 0.1     | Normal     | 159Tb (KED) |
| 158Gd (KED) | KED  | 0.03           | 3             | 0.1     | Normal     | 159Tb (KED) |
| 159Tb (KED) | KED  | 0.03           | 3             | 0.1     | Normal     |             |
| 164Dy (KED) | KED  | 0.03           | 3             | 0.1     | Normal     | 159Tb (KED) |
| 166Er (KED) | KED  | 0.03           | 3             | 0.1     | Normal     | 159Tb (KED) |
| 169Tm (KED) | KED  | 0.03           | 3             | 0.1     | Normal     | 159Tb (KED) |
| 174Yb (KED) | KED  | 0.03           | 3             | 0.1     | Normal     | 159Tb (KED) |
| 175Lu (KED) | KED  | 0.03           | 3             | 0.1     | Normal     | 159Tb (KED) |
| 205Tl (KED) | KED  | 0.03           | 3             | 0.1     | Normal     | 209Bi (KED) |
| 208Pb (KED) | KED  | 0.03           | 3             | 0.1     | Normal     | 209Bi (KED) |
| 209Bi (KED) | KED  | 0.03           | 3             | 0.1     | Normal     |             |
| 232Th (KED) | KED  | 0.03           | 3             | 0.1     | Normal     | 209Bi (KED) |
| 238U (KED)  | KED  | 0.03           | 3             | 0.1     | Normal     | 209Bi (KED) |

| Isotope     | Mode | Dwell time (s) | # of Channels | Spacing | Resolution |
|-------------|------|----------------|---------------|---------|------------|
| 6Li (KED)   | KED  | 0.03           | 3             | 0.1     | Normal     |
| 45Sc (KED)  | KED  | 0.03           | 3             | 0.1     | Normal     |
| 89Y (KED)   | KED  | 0.03           | 3             | 0.1     | Normal     |
| 115In (KED) | KED  | 0.03           | 3             | 0.1     | Normal     |
| 159Tb (KED) | KED  | 0.03           | 3             | 0.1     | Normal     |
| 209Bi (KED) | KED  | 0.03           | 3             | 0.1     | Normal     |

| No. of sweeps | Time per sweep[s] | Time per main run[s] |
|---------------|-------------------|----------------------|
| 10            | 3.87              | 38.7                 |

## Calibration Curves:

9Be (KED)

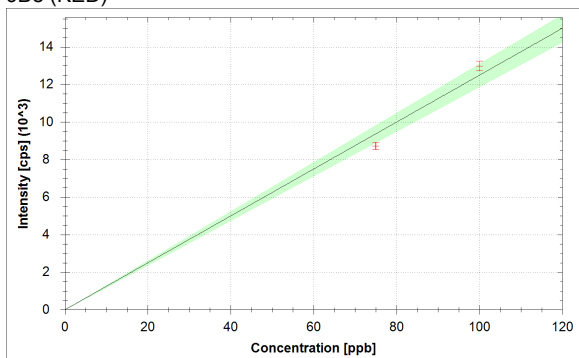

$$f(x) = 124.9240 \cdot x$$

$$R^2 = 0.9948$$

$$\text{BEC} = 0.000 \text{ ppb}$$

$$\text{LoD} = 0.0000 \text{ ppb}$$

11B (KED)

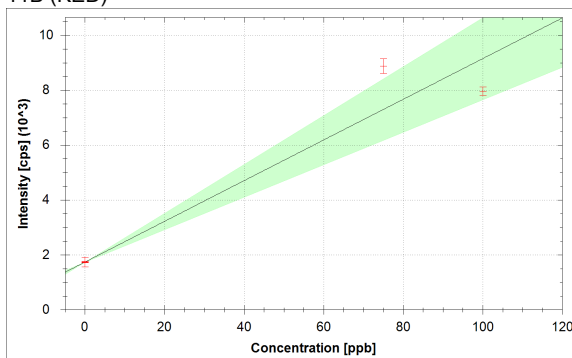

$$f(x) = 74.1391 \cdot x + 1735.4905$$

$$R^2 = 0.9134$$

$$\text{BEC} = 23.409 \text{ ppb}$$

$$\text{LoD} = 7.1649 \text{ ppb}$$

24Mg (KED)

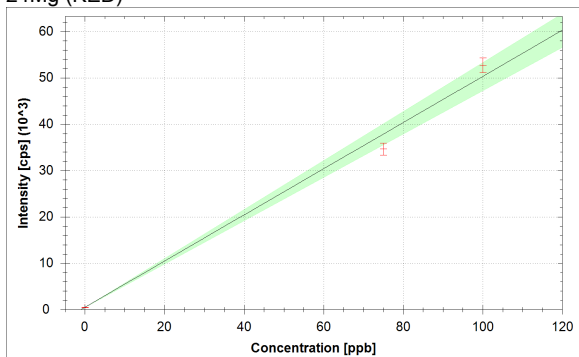

$$f(x) = 498.2452 \cdot x + 489.0984$$

$$R^2 = 0.9920$$

$$\text{BEC} = 0.982 \text{ ppb}$$

$$\text{LoD} = 0.3958 \text{ ppb}$$

27Al (KED)

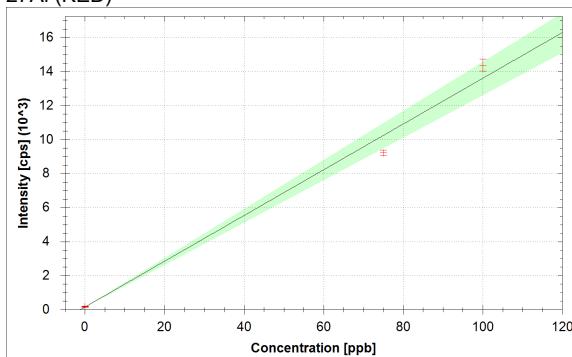

$$f(x) = 134.5426 \cdot x + 147.0973$$

$$R^2 = 0.9890$$

$$\text{BEC} = 1.093 \text{ ppb}$$

$$\text{LoD} = 0.3311 \text{ ppb}$$

51V (KED)

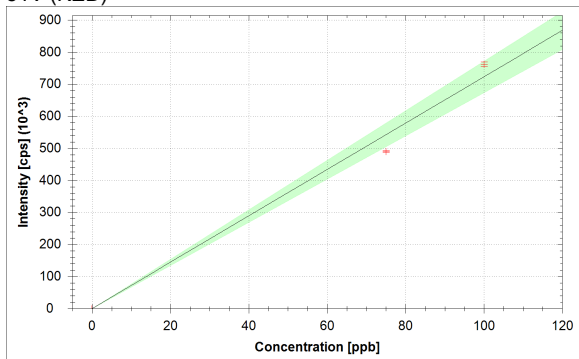

$$f(x) = 7231.9346 \cdot x + 21.3879$$

$$R^2 = 0.9901$$

$$\text{BEC} = 0.003 \text{ ppb}$$

$$\text{LoD} = 0.0018 \text{ ppb}$$

52Cr (KED)

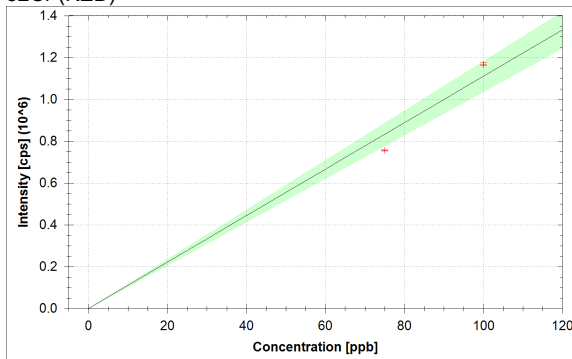

$$f(x) = 11101.3545 \cdot x + 183.0344$$

$$R^2 = 0.9908$$

$$\text{BEC} = 0.016 \text{ ppb}$$

$$\text{LoD} = 0.0078 \text{ ppb}$$

55Mn (KED)

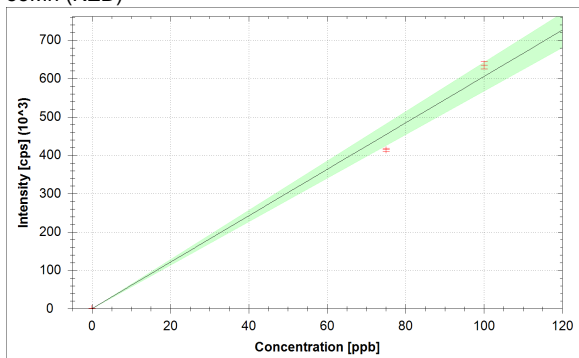

$$f(x) = 6050.0010 \cdot x + 342.7395$$

$$R^2 = 0.9917$$

$$\text{BEC} = 0.057 \text{ ppb}$$

$$\text{LoD} = 0.0226 \text{ ppb}$$

56Fe (KED)

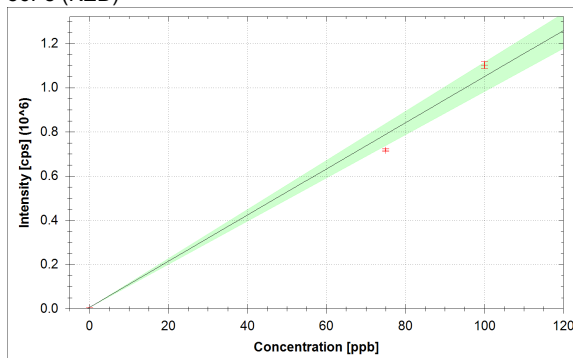

$$f(x) = 10430.4999 \cdot x + 6276.6521$$

$$R^2 = 0.9913$$

$$\text{BEC} = 0.602 \text{ ppb}$$

$$\text{LoD} = 0.0350 \text{ ppb}$$

58Ni (KED)

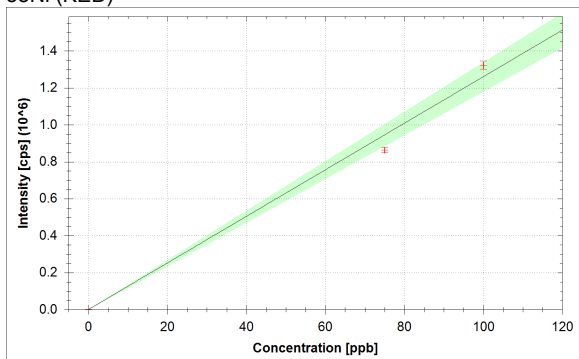

$$f(x) = 12600.0141 \cdot x + 443.7097$$

$$R^2 = 0.9918$$

$$\text{BEC} = 0.035 \text{ ppb}$$

$$\text{LoD} = 0.0050 \text{ ppb}$$

59Co (KED)

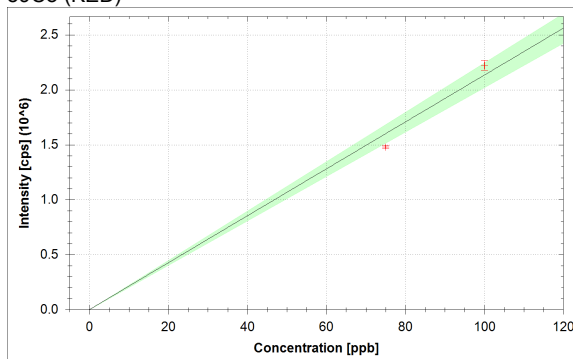

$$f(x) = 21335.6139 \cdot x + 75.2486$$

$$R^2 = 0.9940$$

$$\text{BEC} = 0.004 \text{ ppb}$$

$$\text{LoD} = 0.0006 \text{ ppb}$$

63Cu (KED)

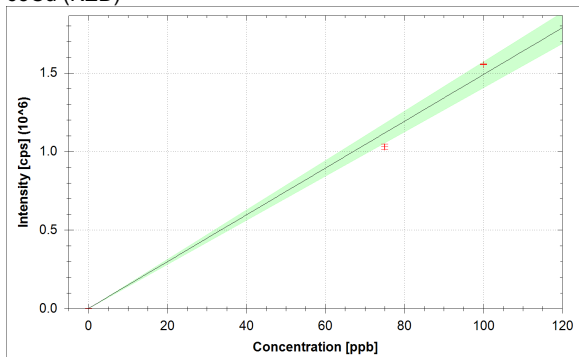

$$f(x) = 14882.1207 \cdot x + 754.1134$$

$$R^2 = 0.9933$$

$$\text{BEC} = 0.051 \text{ ppb}$$

$$\text{LoD} = 0.0155 \text{ ppb}$$

64Zn (KED)

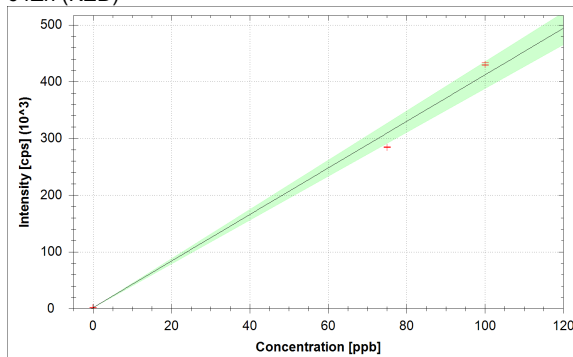

$$f(x) = 4103.2179 \cdot x + 1609.8369$$

$$R^2 = 0.9929$$

$$\text{BEC} = 0.392 \text{ ppb}$$

$$\text{LoD} = 0.0489 \text{ ppb}$$

69Ga (KED)

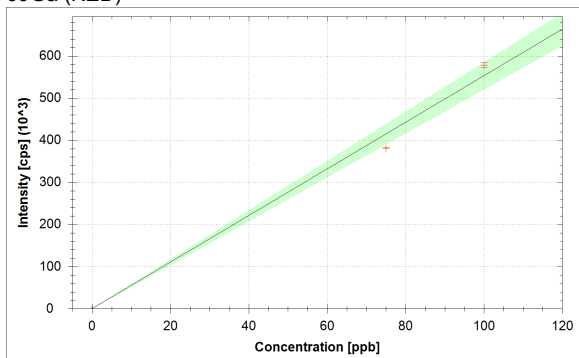

$$f(x) = 5528.9658 \cdot x + 113.2553$$

$$R^2 = 0.9929$$

$$\text{BEC} = 0.020 \text{ ppb}$$

$$\text{LoD} = 0.0057 \text{ ppb}$$

75As (KED)

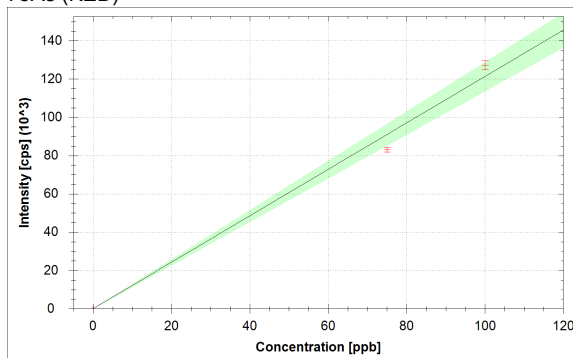

$$f(x) = 1213.0731 \cdot x + 18.0930$$

$$R^2 = 0.9918$$

$$\text{BEC} = 0.015 \text{ ppb}$$

$$\text{LoD} = 0.0238 \text{ ppb}$$

80Se (KED)

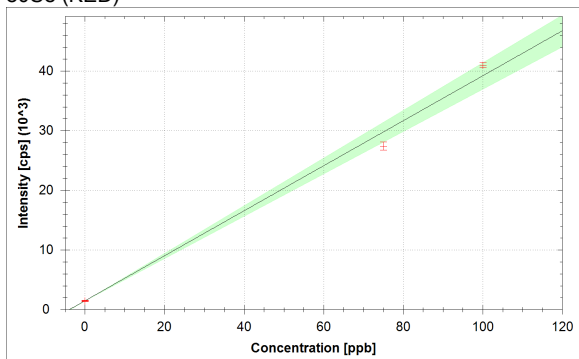

$$f(x) = 377.3792 \cdot x + 1465.6650$$

$$R^2 = 0.9926$$

$$\text{BEC} = 3.884 \text{ ppb}$$

$$\text{LoD} = 0.3195 \text{ ppb}$$

85Rb (KED)

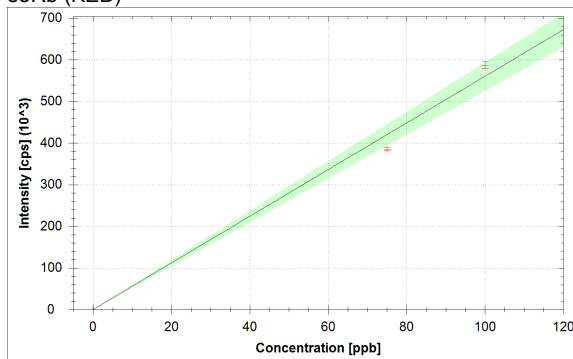

$$f(x) = 5603.4027 \cdot x + 35.0958$$

$$R^2 = 0.9923$$

$$\text{BEC} = 0.006 \text{ ppb}$$

$$\text{LoD} = 0.0106 \text{ ppb}$$

88Sr (KED)

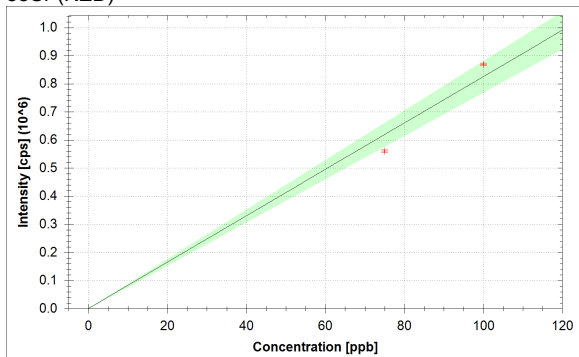

$$f(x) = 8252.0523 \cdot x + 222.9224$$

$$R^2 = 0.9904$$

$$\text{BEC} = 0.027 \text{ ppb}$$

$$\text{LoD} = 0.0115 \text{ ppb}$$

107Ag (KED)

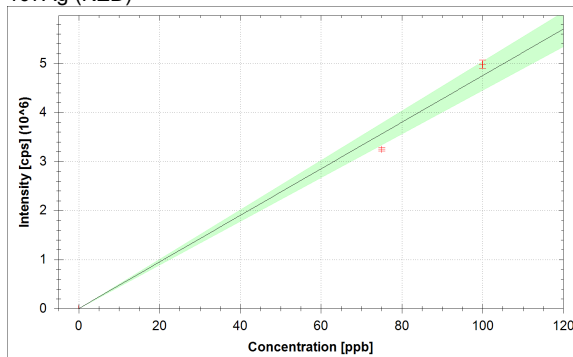

$$f(x) = 47486.9712 \cdot x + 93.7541$$

$$R^2 = 0.9918$$

$$\text{BEC} = 0.002 \text{ ppb}$$

$$\text{LoD} = 0.0010 \text{ ppb}$$

114Cd (KED)

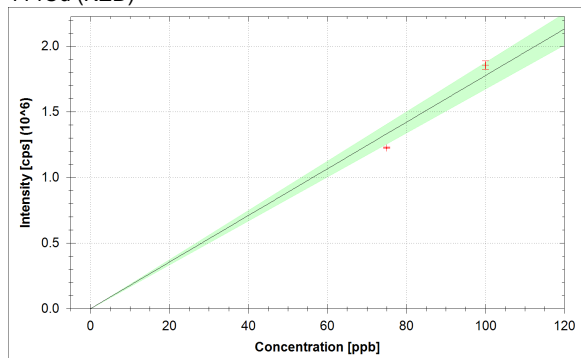

$$f(x) = 17759.4391 \cdot x + 73.6564$$

$$R^2 = 0.9930$$

$$\text{BEC} = 0.004 \text{ ppb}$$

$$\text{LoD} = 0.0027 \text{ ppb}$$

133Cs (KED)

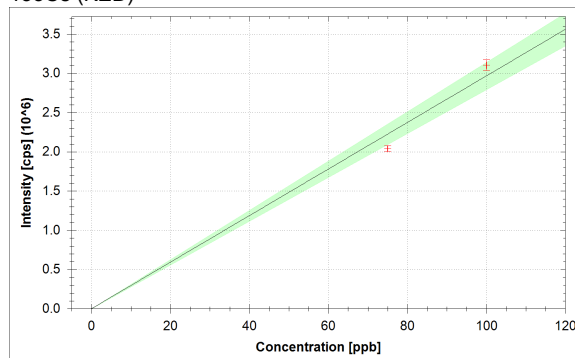

$$f(x) = 29666.1763 \cdot x + 88.1600$$

$$R^2 = 0.9926$$

$$\text{BEC} = 0.003 \text{ ppb}$$

$$\text{LoD} = 0.0003 \text{ ppb}$$

138Ba (KED)

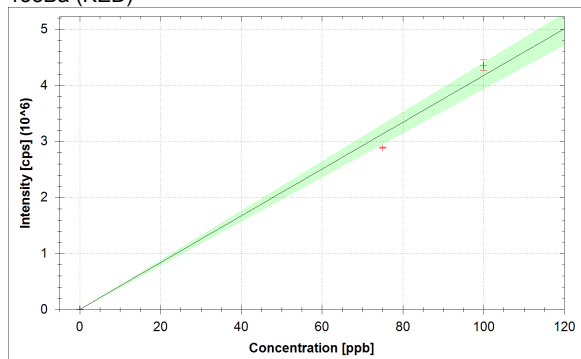

$$f(x) = 41706.2881 \cdot x + 2639.0196$$

$$R^2 = 0.9933$$

$$\text{BEC} = 0.063 \text{ ppb}$$

$$\text{LoD} = 0.0109 \text{ ppb}$$

139La (KED)

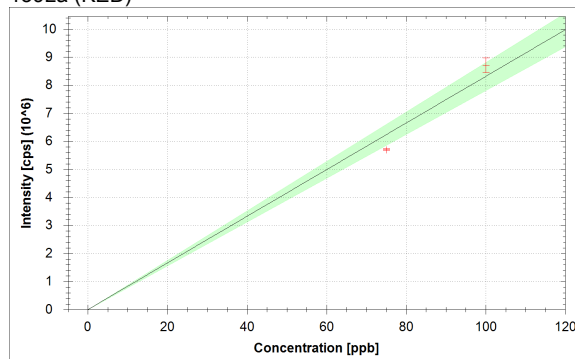

$$f(x) = 83144.1466 \cdot x + 98.1195$$

$$R^2 = 0.9922$$

$$\text{BEC} = 0.001 \text{ ppb}$$

$$\text{LoD} = 0.0004 \text{ ppb}$$

140Ce (KED)

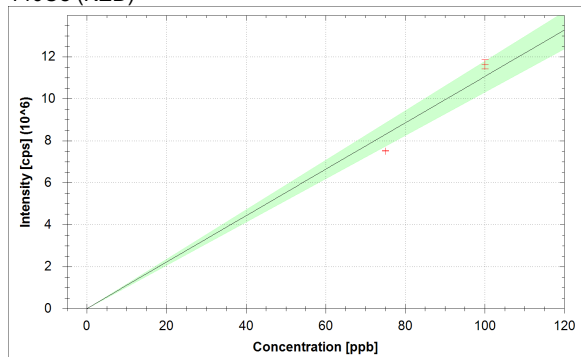

$$f(x) = 110550.5843 \cdot x + 304.5187$$

$$R^2 = 0.9905$$

$$\text{BEC} = 0.003 \text{ ppb}$$

$$\text{LoD} = 0.0010 \text{ ppb}$$

141Pr (KED)

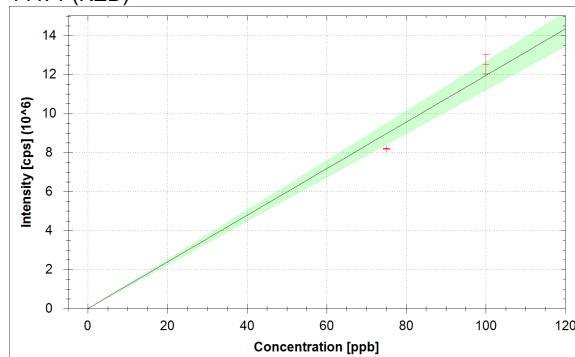

$$f(x) = 119470.4383 \cdot x + 63.1508$$

$$R^2 = 0.9920$$

$$\text{BEC} = 0.001 \text{ ppb}$$

$$\text{LoD} = 0.0004 \text{ ppb}$$

**<sup>142</sup>Nd (KED)**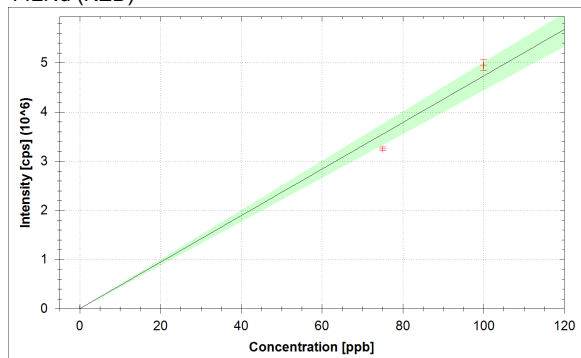

$$f(x) = 47309.6589 \cdot x + 75.5298$$

$$R^2 = 0.9925$$

$$\text{BEC} = 0.002 \text{ ppb}$$

$$\text{LoD} = 0.0009 \text{ ppb}$$

**<sup>152</sup>Sm (KED)**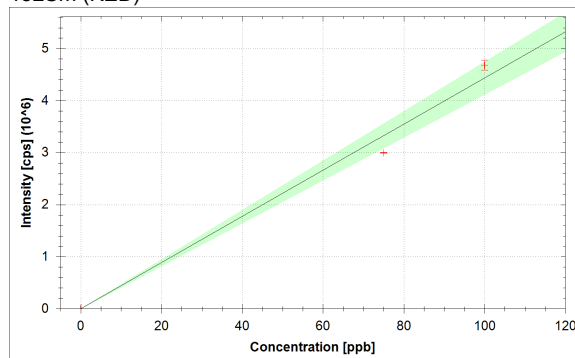

$$f(x) = 44336.6882 \cdot x + 12.4006$$

$$R^2 = 0.9894$$

$$\text{BEC} = 0.000 \text{ ppb}$$

$$\text{LoD} = 0.0004 \text{ ppb}$$

**<sup>153</sup>Eu (KED)**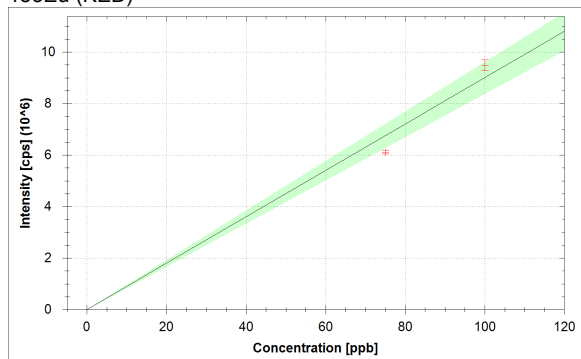

$$f(x) = 90036.3360 \cdot x + 28.2067$$

$$R^2 = 0.9902$$

$$\text{BEC} = 0.000 \text{ ppb}$$

$$\text{LoD} = 0.0003 \text{ ppb}$$

**<sup>158</sup>Gd (KED)**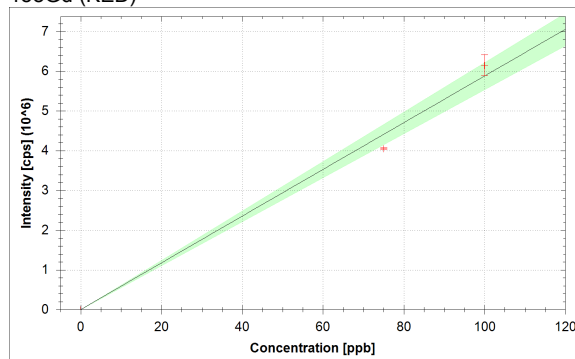

$$f(x) = 58803.4095 \cdot x + 36.0959$$

$$R^2 = 0.9928$$

$$\text{BEC} = 0.001 \text{ ppb}$$

$$\text{LoD} = 0.0007 \text{ ppb}$$

**<sup>164</sup>Dy (KED)**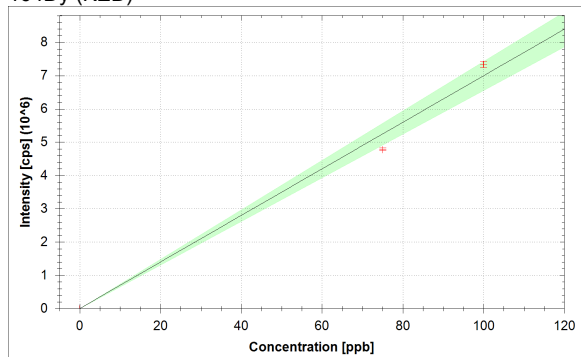

$$f(x) = 69937.9717 \cdot x + 30.4424$$

$$R^2 = 0.9916$$

$$\text{BEC} = 0.000 \text{ ppb}$$

$$\text{LoD} = 0.0002 \text{ ppb}$$

**<sup>166</sup>Er (KED)**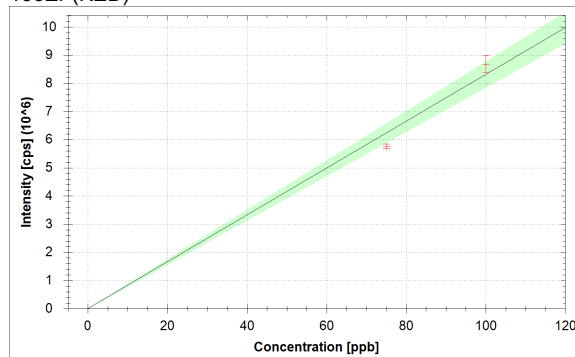

$$f(x) = 83153.2040 \cdot x + 286.4273$$

$$R^2 = 0.9936$$

$$\text{BEC} = 0.003 \text{ ppb}$$

$$\text{LoD} = 0.0009 \text{ ppb}$$

169Tm (KED)

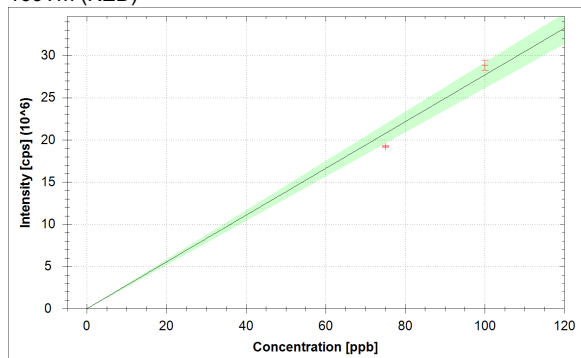

$$f(x) = 276789.7676 \cdot x + 64.2786$$

$$R^2 = 0.9938$$

$$\text{BEC} = 0.000 \text{ ppb}$$

$$\text{LoD} = 0.0002 \text{ ppb}$$

174Yb (KED)

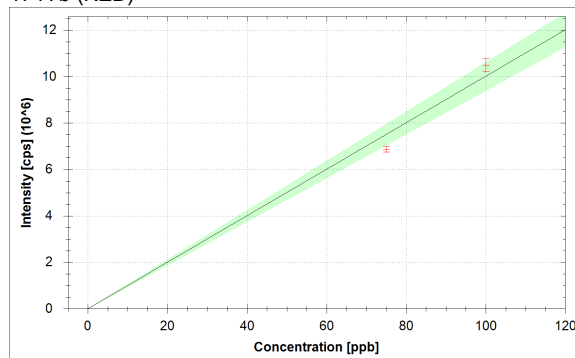

$$f(x) = 100132.9827 \cdot x + 40.6112$$

$$R^2 = 0.9921$$

$$\text{BEC} = 0.000 \text{ ppb}$$

$$\text{LoD} = 0.0002 \text{ ppb}$$

175Lu (KED)

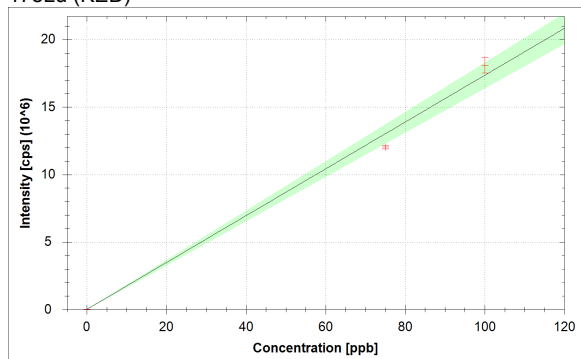

$$f(x) = 173368.7044 \cdot x + 17329.6593$$

$$R^2 = 0.9937$$

$$\text{BEC} = 0.100 \text{ ppb}$$

$$\text{LoD} = 0.0127 \text{ ppb}$$

205Tl (KED)

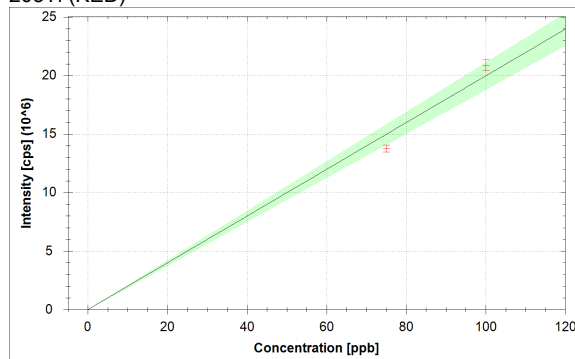

$$f(x) = 199639.4699 \cdot x + 55.5859$$

$$R^2 = 0.9929$$

$$\text{BEC} = 0.000 \text{ ppb}$$

$$\text{LoD} = 0.0003 \text{ ppb}$$

208Pb (KED)

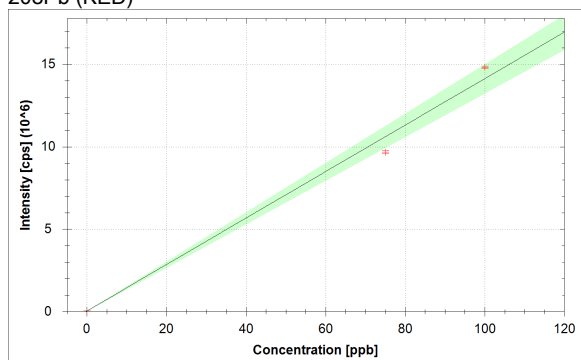

$$f(x) = 140945.7638 \cdot x + 33466.7568$$

$$R^2 = 0.9918$$

$$\text{BEC} = 0.237 \text{ ppb}$$

$$\text{LoD} = 0.0093 \text{ ppb}$$

232Th (KED)

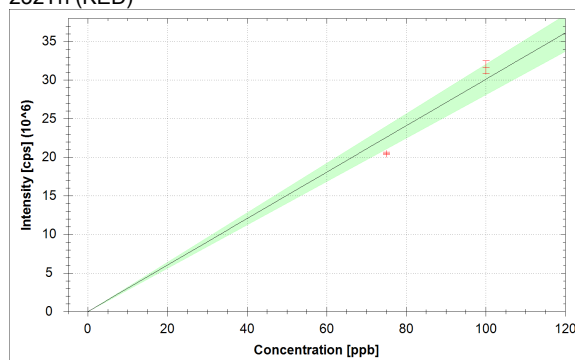

$$f(x) = 300888.1119 \cdot x + 2387.1139$$

$$R^2 = 0.9908$$

$$\text{BEC} = 0.008 \text{ ppb}$$

$$\text{LoD} = 0.0005 \text{ ppb}$$

<sup>238</sup>U (KED)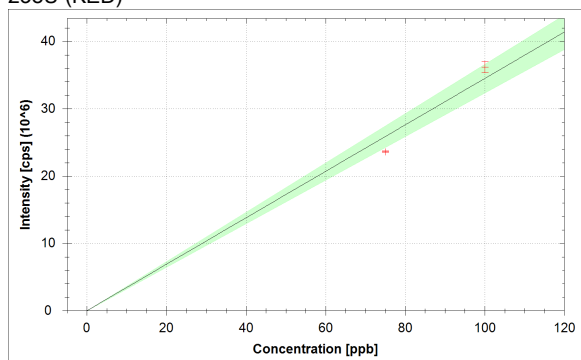

$$f(x) = 344884.7908 \cdot x + 1029.6627$$

$$R^2 = 0.9918$$

$$\text{BEC} = 0.003 \text{ ppb}$$

$$\text{LoD} = 0.0006 \text{ ppb}$$

**Standards:**

Analysis Index: 3  
 Analysis Name: 0+20  
 Analysis Type: STD  
 Analysis Started at: 9/30/2021 2:34:10 PM  
 Standard (Stock): std0  
 Standard DF: 1

| Category    | Concentration average | Concentration RSD | Standard Concentration |
|-------------|-----------------------|-------------------|------------------------|
| 6Li (KED)   | 93.533 %              |                   |                        |
| 9Be (KED)   | 0.000 ppb             |                   | 0.000 ppb              |
| 11B (KED)   | 0.000 ppb             | 0.0 %             | 0.000 ppb              |
| 24Mg (KED)  | 0.000 ppb             | 0.1 %             | 0.000 ppb              |
| 27Al (KED)  | 0.000 ppb             | 0.1 %             | 0.000 ppb              |
| 45Sc (KED)  | 98.907 %              |                   |                        |
| 51V (KED)   | 0.000 ppb             | 0.4 %             | 0.000 ppb              |
| 52Cr (KED)  | 0.000 ppb             | 0.1 %             | 0.000 ppb              |
| 55Mn (KED)  | 0.000 ppb             | 0.1 %             | 0.000 ppb              |
| 56Fe (KED)  | 0.000 ppb             | 0.0 %             | 0.000 ppb              |
| 58Ni (KED)  | 0.000 ppb             | 0.1 %             | 0.000 ppb              |
| 59Co (KED)  | 0.000 ppb             | 0.1 %             | 0.000 ppb              |
| 63Cu (KED)  | 0.000 ppb             | 0.1 %             | 0.000 ppb              |
| 64Zn (KED)  | 0.000 ppb             | 0.0 %             | 0.000 ppb              |
| 69Ga (KED)  | 0.000 ppb             | 0.2 %             | 0.000 ppb              |
| 75As (KED)  | 0.000 ppb             | 0.4 %             | 0.000 ppb              |
| 80Se (KED)  | 0.000 ppb             | 0.1 %             | 0.000 ppb              |
| 85Rb (KED)  | 0.000 ppb             | 0.2 %             | 0.000 ppb              |
| 88Sr (KED)  | 0.000 ppb             | 0.1 %             | 0.000 ppb              |
| 89Y (KED)   | 98.165 %              |                   |                        |
| 107Ag (KED) | 0.000 ppb             | 0.0 %             | 0.000 ppb              |
| 114Cd (KED) | 0.000 ppb             | 0.3 %             | 0.000 ppb              |
| 115In (KED) | 99.552 %              |                   |                        |
| 133Cs (KED) | 0.000 ppb             | 0.2 %             | 0.000 ppb              |
| 138Ba (KED) | 0.000 ppb             | 0.0 %             | 0.000 ppb              |
| 139La (KED) | 0.000 ppb             | 0.3 %             | 0.000 ppb              |
| 140Ce (KED) | 0.000 ppb             | 0.1 %             | 0.000 ppb              |
| 141Pr (KED) | 0.000 ppb             | 0.0 %             | 0.000 ppb              |
| 142Nd (KED) | 0.000 ppb             | 0.3 %             | 0.000 ppb              |
| 152Sm (KED) | 0.000 ppb             | 0.3 %             | 0.000 ppb              |
| 153Eu (KED) | 0.000 ppb             | 0.5 %             | 0.000 ppb              |
| 158Gd (KED) | 0.000 ppb             | 0.2 %             | 0.000 ppb              |
| 159Tb (KED) | 98.527 %              |                   |                        |
| 164Dy (KED) | 0.000 ppb             | 0.2 %             | 0.000 ppb              |
| 166Er (KED) | 0.000 ppb             | 0.1 %             | 0.000 ppb              |
| 169Tm (KED) | 0.000 ppb             | 0.1 %             | 0.000 ppb              |
| 174Yb (KED) | 0.000 ppb             | 0.3 %             | 0.000 ppb              |
| 175Lu (KED) | 0.000 ppb             | 0.0 %             | 0.000 ppb              |
| 205Tl (KED) | 0.000 ppb             | 0.1 %             | 0.000 ppb              |
| 208Pb (KED) | 0.000 ppb             | 0.0 %             | 0.000 ppb              |
| 209Bi (KED) | 99.958 %              |                   |                        |
| 232Th (KED) | 0.000 ppb             | 0.1 %             | 0.000 ppb              |
| 238U (KED)  | 0.000 ppb             | 0.1 %             | 0.000 ppb              |

**Standards:**

Analysis Index: 4  
 Analysis Name: 50+20  
 Analysis Type: STD  
 Analysis Started at: 9/30/2021 2:39:15 PM  
 Standard (Stock): std1  
 Standard DF: 1

| Category    | Concentration average | Concentration RSD | Standard Concentration |
|-------------|-----------------------|-------------------|------------------------|
| 6Li (KED)   | 99.719 %              |                   |                        |
| 9Be (KED)   | 69.809 ppb            | 2.2 %             | 75.000 ppb             |
| 11B (KED)   | 96.329 ppb            | 3.8 %             | 75.000 ppb             |
| 24Mg (KED)  | 68.540 ppb            | 3.8 %             | 75.000 ppb             |
| 27Al (KED)  | 67.397 ppb            | 1.7 %             | 75.000 ppb             |
| 45Sc (KED)  | 101.881 %             |                   |                        |
| 51V (KED)   | 67.798 ppb            | 0.5 %             | 75.000 ppb             |
| 52Cr (KED)  | 68.070 ppb            | 0.4 %             | 75.000 ppb             |
| 55Mn (KED)  | 68.420 ppb            | 1.1 %             | 75.000 ppb             |
| 56Fe (KED)  | 68.263 ppb            | 0.8 %             | 75.000 ppb             |
| 58Ni (KED)  | 68.450 ppb            | 1.6 %             | 75.000 ppb             |
| 59Co (KED)  | 69.398 ppb            | 0.9 %             | 75.000 ppb             |
| 63Cu (KED)  | 69.098 ppb            | 1.7 %             | 75.000 ppb             |
| 64Zn (KED)  | 68.895 ppb            | 0.3 %             | 75.000 ppb             |
| 69Ga (KED)  | 68.921 ppb            | 0.2 %             | 75.000 ppb             |
| 75As (KED)  | 68.446 ppb            | 1.3 %             | 75.000 ppb             |
| 80Se (KED)  | 68.764 ppb            | 2.5 %             | 75.000 ppb             |
| 85Rb (KED)  | 68.659 ppb            | 1.0 %             | 75.000 ppb             |
| 88Sr (KED)  | 67.896 ppb            | 0.9 %             | 75.000 ppb             |
| 89Y (KED)   | 104.824 %             |                   |                        |
| 107Ag (KED) | 68.438 ppb            | 1.1 %             | 75.000 ppb             |
| 114Cd (KED) | 68.967 ppb            | 0.5 %             | 75.000 ppb             |
| 115In (KED) | 106.366 %             |                   |                        |
| 133Cs (KED) | 68.786 ppb            | 1.6 %             | 75.000 ppb             |
| 138Ba (KED) | 69.098 ppb            | 0.5 %             | 75.000 ppb             |
| 139La (KED) | 68.625 ppb            | 0.6 %             | 75.000 ppb             |
| 140Ce (KED) | 67.930 ppb            | 0.1 %             | 75.000 ppb             |
| 141Pr (KED) | 68.525 ppb            | 0.3 %             | 75.000 ppb             |
| 142Nd (KED) | 68.721 ppb            | 1.1 %             | 75.000 ppb             |
| 152Sm (KED) | 67.542 ppb            | 0.2 %             | 75.000 ppb             |
| 153Eu (KED) | 67.834 ppb            | 1.2 %             | 75.000 ppb             |
| 158Gd (KED) | 68.854 ppb            | 0.6 %             | 75.000 ppb             |
| 159Tb (KED) | 107.063 %             |                   |                        |
| 164Dy (KED) | 68.383 ppb            | 0.8 %             | 75.000 ppb             |
| 166Er (KED) | 69.204 ppb            | 1.4 %             | 75.000 ppb             |
| 169Tm (KED) | 69.305 ppb            | 0.7 %             | 75.000 ppb             |
| 174Yb (KED) | 68.587 ppb            | 1.8 %             | 75.000 ppb             |
| 175Lu (KED) | 69.287 ppb            | 1.0 %             | 75.000 ppb             |
| 205Tl (KED) | 68.917 ppb            | 2.2 %             | 75.000 ppb             |
| 208Pb (KED) | 68.454 ppb            | 0.9 %             | 75.000 ppb             |
| 209Bi (KED) | 105.588 %             |                   |                        |
| 232Th (KED) | 68.045 ppb            | 0.8 %             | 75.000 ppb             |
| 238U (KED)  | 68.444 ppb            | 0.5 %             | 75.000 ppb             |

## Standards:

Analysis Index: 5  
 Analysis Name: 100+20  
 Analysis Type: STD  
 Analysis Started at: 9/30/2021 2:44:27 PM  
 Standard (Stock): std2  
 Standard DF: 1

| Category    | Concentration average | Concentration RSD | Standard Concentration |
|-------------|-----------------------|-------------------|------------------------|
| 6Li (KED)   | 97.992 %              |                   |                        |
| 9Be (KED)   | 103.893 ppb           | 2.0 %             | 100.000 ppb            |
| 11B (KED)   | 84.003 ppb            | 2.4 %             | 100.000 ppb            |
| 24Mg (KED)  | 104.845 ppb           | 2.9 %             | 100.000 ppb            |
| 27Al (KED)  | 105.702 ppb           | 2.5 %             | 100.000 ppb            |
| 45Sc (KED)  | 99.274 %              |                   |                        |
| 51V (KED)   | 105.402 ppb           | 0.9 %             | 100.000 ppb            |
| 52Cr (KED)  | 105.198 ppb           | 0.7 %             | 100.000 ppb            |
| 55Mn (KED)  | 104.935 ppb           | 1.6 %             | 100.000 ppb            |
| 56Fe (KED)  | 105.053 ppb           | 1.5 %             | 100.000 ppb            |
| 58Ni (KED)  | 104.913 ppb           | 1.7 %             | 100.000 ppb            |
| 59Co (KED)  | 104.202 ppb           | 2.0 %             | 100.000 ppb            |
| 63Cu (KED)  | 104.426 ppb           | 0.1 %             | 100.000 ppb            |
| 64Zn (KED)  | 104.579 ppb           | 0.6 %             | 100.000 ppb            |
| 69Ga (KED)  | 104.559 ppb           | 1.0 %             | 100.000 ppb            |
| 75As (KED)  | 104.916 ppb           | 1.8 %             | 100.000 ppb            |
| 80Se (KED)  | 104.677 ppb           | 1.1 %             | 100.000 ppb            |
| 85Rb (KED)  | 104.756 ppb           | 1.4 %             | 100.000 ppb            |
| 88Sr (KED)  | 105.328 ppb           | 0.5 %             | 100.000 ppb            |
| 89Y (KED)   | 103.061 %             |                   |                        |
| 107Ag (KED) | 104.921 ppb           | 1.8 %             | 100.000 ppb            |
| 114Cd (KED) | 104.525 ppb           | 1.7 %             | 100.000 ppb            |
| 115In (KED) | 104.845 %             |                   |                        |
| 133Cs (KED) | 104.661 ppb           | 2.2 %             | 100.000 ppb            |
| 138Ba (KED) | 104.427 ppb           | 2.3 %             | 100.000 ppb            |
| 139La (KED) | 104.781 ppb           | 3.0 %             | 100.000 ppb            |
| 140Ce (KED) | 105.302 ppb           | 1.9 %             | 100.000 ppb            |
| 141Pr (KED) | 104.856 ppb           | 4.0 %             | 100.000 ppb            |
| 142Nd (KED) | 104.710 ppb           | 2.3 %             | 100.000 ppb            |
| 152Sm (KED) | 105.594 ppb           | 2.1 %             | 100.000 ppb            |
| 153Eu (KED) | 105.375 ppb           | 2.3 %             | 100.000 ppb            |
| 158Gd (KED) | 104.609 ppb           | 4.2 %             | 100.000 ppb            |
| 159Tb (KED) | 105.647 %             |                   |                        |
| 164Dy (KED) | 104.963 ppb           | 1.3 %             | 100.000 ppb            |
| 166Er (KED) | 104.347 ppb           | 3.4 %             | 100.000 ppb            |
| 169Tm (KED) | 104.271 ppb           | 2.1 %             | 100.000 ppb            |
| 174Yb (KED) | 104.810 ppb           | 2.7 %             | 100.000 ppb            |
| 175Lu (KED) | 104.285 ppb           | 3.2 %             | 100.000 ppb            |
| 205Tl (KED) | 104.562 ppb           | 2.3 %             | 100.000 ppb            |
| 208Pb (KED) | 104.910 ppb           | 0.5 %             | 100.000 ppb            |
| 209Bi (KED) | 103.975 %             |                   |                        |
| 232Th (KED) | 105.217 ppb           | 2.6 %             | 100.000 ppb            |
| 238U (KED)  | 104.917 ppb           | 2.3 %             | 100.000 ppb            |

---

## Sample List Summary:

Instrument ID: iCAP Q

| Index: | Label:             | Main<br>Runs: | Survey<br>Runs: | Start Time:          | User name:                    |
|--------|--------------------|---------------|-----------------|----------------------|-------------------------------|
| 1      | water              | 3             | 0               | 9/30/2021 2:27:24 PM | WINDOWS-UPCI4ER\Administrator |
| 2      | blk                | 3             | 0               | 9/30/2021 2:30:27 PM | WINDOWS-UPCI4ER\Administrator |
| 3      | 0+20               | 3             | 0               | 9/30/2021 2:34:10 PM | WINDOWS-UPCI4ER\Administrator |
| 4      | 50+20              | 3             | 0               | 9/30/2021 2:39:15 PM | WINDOWS-UPCI4ER\Administrator |
| 5      | 100+20             | 3             | 0               | 9/30/2021 2:44:27 PM | WINDOWS-UPCI4ER\Administrator |
| 6      | 179184jian         | 3             | 0               | 9/30/2021 2:49:27 PM | WINDOWS-UPCI4ER\Administrator |
| 7      | 033915(179178)jian | 3             | 0               | 9/30/2021 2:54:21 PM | WINDOWS-UPCI4ER\Administrator |
| 8      | 046214(179142)jian | 3             | 0               | 9/30/2021 2:59:11 PM | WINDOWS-UPCI4ER\Administrator |

## Sample Summary

Instrument ID: iCAP Q

Analysis index: 1

Analysis name: water

Analysis started at: 9/30/2021 2:27:24 PM

User name: WINDOWS-UPCI4ER\Administrator

| Category    | Concentration average | Concentration RSD |
|-------------|-----------------------|-------------------|
| 6Li (KED)   | 0.040 %               | 173.2 %           |
| 24Mg (KED)  | Infinity ppb          |                   |
| 45Sc (KED)  | 0.005 %               | 173.2 %           |
| 51V (KED)   | Infinity ppb          |                   |
| 55Mn (KED)  | Infinity ppb          |                   |
| 56Fe (KED)  | Infinity ppb          |                   |
| 58Ni (KED)  | Infinity ppb          |                   |
| 63Cu (KED)  | Infinity ppb          |                   |
| 64Zn (KED)  | Infinity ppb          |                   |
| 75As (KED)  | Infinity ppb          |                   |
| 80Se (KED)  | Infinity ppb          |                   |
| 89Y (KED)   | 0.000 %               | 173.2 %           |
| 115In (KED) | 0.000 %               | 173.2 %           |
| 138Ba (KED) | 545.640 ppb           | 94.3 %            |
| 139La (KED) | -0.001 ppb            | 0.0 %             |
| 140Ce (KED) | -0.003 ppb            | 0.0 %             |
| 141Pr (KED) | -0.001 ppb            | 0.0 %             |
| 142Nd (KED) | -0.002 ppb            | 0.0 %             |
| 152Sm (KED) | 32.372 ppb            | 173.2 %           |
| 153Eu (KED) | 0.000 ppb             | 0.0 %             |
| 158Gd (KED) | -0.001 ppb            | 0.0 %             |
| 159Tb (KED) | 0.000 %               | 96.4 %            |
| 164Dy (KED) | 0.000 ppb             | 0.0 %             |
| 166Er (KED) | -0.003 ppb            | 0.0 %             |
| 169Tm (KED) | 0.000 ppb             | 0.0 %             |
| 174Yb (KED) | 0.000 ppb             | 0.0 %             |
| 175Lu (KED) | -0.100 ppb            | 0.0 %             |
| 205Tl (KED) | 10.493 ppb            | 73.2 %            |
| 208Pb (KED) | 72.022 ppb            | 39.1 %            |
| 209Bi (KED) | 0.001 %               | 27.3 %            |
| 232Th (KED) | -0.008 ppb            | 0.0 %             |
| 238U (KED)  | 0.336 ppb             | 174.7 %           |

| Category   | Concentration average | Intensity average | Intensity RSD |
|------------|-----------------------|-------------------|---------------|
| 6Li (KED)  | 0.040 %               | 1 cps             | 173.2 %       |
| 9Be (KED)  |                       | 0 cps             |               |
| 11B (KED)  |                       | 7 cps             | 86.6 %        |
| 24Mg (KED) | Infinity ppb          | 9 cps             | 57.3 %        |
| 27Al (KED) |                       | 2 cps             | 86.6 %        |
| 45Sc (KED) | 0.005 %               | 2 cps             | 173.2 %       |
| 51V (KED)  | Infinity ppb          | 4 cps             | 43.3 %        |
| 52Cr (KED) |                       | 6 cps             | 91.7 %        |
| 55Mn (KED) | Infinity ppb          | 6 cps             | 69.3 %        |
| 56Fe (KED) | Infinity ppb          | 232 cps           | 7.4 %         |
| 58Ni (KED) | Infinity ppb          | 192 cps           | 9.6 %         |
| 59Co (KED) |                       | 0 cps             |               |
| 63Cu (KED) | Infinity ppb          | 26 cps            | 19.9 %        |
| 64Zn (KED) | Infinity ppb          | 220 cps           | 5.5 %         |
| 69Ga (KED) |                       | 2 cps             | 173.2 %       |
| 75As (KED) | Infinity ppb          | 7 cps             | 50.0 %        |

| Category    | Concentration average | Intensity average | Intensity RSD |
|-------------|-----------------------|-------------------|---------------|
| 80Se (KED)  | Infinity ppb          | 1,506 cps         | 4.5 %         |
| 85Rb (KED)  |                       | 2 cps             | 86.6 %        |
| 88Sr (KED)  |                       | 0 cps             |               |
| 89Y (KED)   | 0.000 %               | 1 cps             | 173.2 %       |
| 107Ag (KED) |                       | 4 cps             | 86.6 %        |
| 114Cd (KED) |                       | 2 cps             | 173.2 %       |
| 115In (KED) | 0.000 %               | 3 cps             | 173.2 %       |
| 133Cs (KED) |                       | 1 cps             | 173.2 %       |
| 138Ba (KED) | 545.640 ppb           | 33 cps            | 36.1 %        |
| 139La (KED) | -0.001 ppb            | 0 cps             |               |
| 140Ce (KED) | -0.003 ppb            | 0 cps             |               |
| 141Pr (KED) | -0.001 ppb            | 0 cps             |               |
| 142Nd (KED) | -0.002 ppb            | 0 cps             |               |
| 152Sm (KED) | 32.372 ppb            | 2 cps             | 173.2 %       |
| 153Eu (KED) | 0.000 ppb             | 0 cps             |               |
| 158Gd (KED) | -0.001 ppb            | 0 cps             |               |
| 159Tb (KED) | 0.000 %               | 11 cps            | 96.4 %        |
| 164Dy (KED) | 0.000 ppb             | 0 cps             |               |
| 166Er (KED) | -0.003 ppb            | 0 cps             |               |
| 169Tm (KED) | 0.000 ppb             | 0 cps             |               |
| 174Yb (KED) | 0.000 ppb             | 0 cps             |               |
| 175Lu (KED) | -0.100 ppb            | 0 cps             |               |
| 205Tl (KED) | 10.493 ppb            | 18 cps            | 47.2 %        |
| 208Pb (KED) | 72.022 ppb            | 90 cps            | 16.1 %        |
| 209Bi (KED) | 0.001 %               | 37 cps            | 27.3 %        |
| 232Th (KED) | -0.008 ppb            | 0 cps             |               |
| 238U (KED)  | 0.336 ppb             | 1 cps             | 173.2 %       |

## Sample Summary

Instrument ID: iCAP Q

Analysis index: 2

Analysis name: blk

Analysis started at: 9/30/2021 2:30:27 PM

User name: WINDOWS-UPCI4ER\Administrator

| Category    | Concentration average | Concentration RSD |
|-------------|-----------------------|-------------------|
| 6Li (KED)   | 100.000 %             |                   |
| 9Be (KED)   | 0.000 ppb             |                   |
| 11B (KED)   | -0.025 ppb            | 9,500.2 %         |
| 24Mg (KED)  | -0.084 ppb            | 157.0 %           |
| 27Al (KED)  | 0.195 ppb             | 56.7 %            |
| 45Sc (KED)  | 100.000 %             |                   |
| 51V (KED)   | 0.000 ppb             | 119.6 %           |
| 52Cr (KED)  | 0.002 ppb             | 120.3 %           |
| 55Mn (KED)  | 0.009 ppb             | 82.4 %            |
| 56Fe (KED)  | 0.037 ppb             | 31.7 %            |
| 58Ni (KED)  | 0.001 ppb             | 159.2 %           |
| 59Co (KED)  | 0.000 ppb             | 210.1 %           |
| 63Cu (KED)  | 0.003 ppb             | 151.8 %           |
| 64Zn (KED)  | -0.013 ppb            | 127.9 %           |
| 69Ga (KED)  | -0.005 ppb            | 38.2 %            |
| 75As (KED)  | -0.002 ppb            | 379.7 %           |
| 80Se (KED)  | -0.232 ppb            | 45.8 %            |
| 85Rb (KED)  | -0.002 ppb            | 188.4 %           |
| 88Sr (KED)  | 0.002 ppb             | 211.0 %           |
| 89Y (KED)   | 100.000 %             |                   |
| 107Ag (KED) | 0.000 ppb             | 140.7 %           |
| 114Cd (KED) | 0.000 ppb             | 1,169.4 %         |
| 115In (KED) | 100.000 %             |                   |
| 133Cs (KED) | 0.000 ppb             | 34.9 %            |
| 138Ba (KED) | -0.003 ppb            | 135.7 %           |
| 139La (KED) | 0.000 ppb             | 223.7 %           |
| 140Ce (KED) | 0.000 ppb             | 1,272.4 %         |
| 141Pr (KED) | 0.000 ppb             | 195.3 %           |
| 142Nd (KED) | 0.000 ppb             | 403.5 %           |
| 152Sm (KED) | 0.000 ppb             | 70.1 %            |
| 153Eu (KED) | 0.000 ppb             | 47.8 %            |
| 158Gd (KED) | 0.000 ppb             | 541.3 %           |
| 159Tb (KED) | 100.000 %             |                   |
| 164Dy (KED) | 0.000 ppb             | 58.8 %            |
| 166Er (KED) | 0.000 ppb             | 375.7 %           |
| 169Tm (KED) | 0.000 ppb             | 1,578.4 %         |
| 174Yb (KED) | 0.000 ppb             | 1,025.5 %         |
| 175Lu (KED) | 0.005 ppb             | 86.2 %            |
| 205Tl (KED) | 0.000 ppb             | 791.5 %           |
| 208Pb (KED) | 0.000 ppb             | 1,043.9 %         |
| 209Bi (KED) | 100.000 %             |                   |
| 232Th (KED) | 0.000 ppb             | 44.8 %            |
| 238U (KED)  | 0.000 ppb             | 166.9 %           |

| Category   | Concentration average | Intensity average | Intensity RSD |
|------------|-----------------------|-------------------|---------------|
| 6Li (KED)  | 100.000 %             | 2,767 cps         | 3.8 %         |
| 9Be (KED)  | 0.000 ppb             | 0 cps             |               |
| 11B (KED)  | -0.025 ppb            | 1,730 cps         | 7.7 %         |
| 24Mg (KED) | -0.084 ppb            | 446 cps           | 11.2 %        |
| 27Al (KED) | 0.195 ppb             | 173 cps           | 9.6 %         |

| Category    | Concentration average | Intensity average | Intensity RSD |
|-------------|-----------------------|-------------------|---------------|
| 45Sc (KED)  | 100.000 %             | 44,094 cps        | 2.8 %         |
| 51V (KED)   | 0.000 ppb             | 18 cps            | 21.7 %        |
| 52Cr (KED)  | 0.002 ppb             | 207 cps           | 11.6 %        |
| 55Mn (KED)  | 0.009 ppb             | 398 cps           | 11.2 %        |
| 56Fe (KED)  | 0.037 ppb             | 6,663 cps         | 4.4 %         |
| 58Ni (KED)  | 0.001 ppb             | 457 cps           | 3.2 %         |
| 59Co (KED)  | 0.000 ppb             | 73 cps            | 7.9 %         |
| 63Cu (KED)  | 0.003 ppb             | 804 cps           | 9.3 %         |
| 64Zn (KED)  | -0.013 ppb            | 1,558 cps         | 5.2 %         |
| 69Ga (KED)  | -0.005 ppb            | 86 cps            | 12.5 %        |
| 75As (KED)  | -0.002 ppb            | 16 cps            | 61.9 %        |
| 80Se (KED)  | -0.232 ppb            | 1,378 cps         | 2.9 %         |
| 85Rb (KED)  | -0.002 ppb            | 24 cps            | 78.7 %        |
| 88Sr (KED)  | 0.002 ppb             | 238 cps           | 13.0 %        |
| 89Y (KED)   | 100.000 %             | 418,527 cps       | 1.6 %         |
| 107Ag (KED) | 0.000 ppb             | 106 cps           | 16.2 %        |
| 114Cd (KED) | 0.000 ppb             | 72 cps            | 21.3 %        |
| 115In (KED) | 100.000 %             | 794,412 cps       | 0.7 %         |
| 133Cs (KED) | 0.000 ppb             | 80 cps            | 4.2 %         |
| 138Ba (KED) | -0.003 ppb            | 2,527 cps         | 5.8 %         |
| 139La (KED) | 0.000 ppb             | 103 cps           | 9.7 %         |
| 140Ce (KED) | 0.000 ppb             | 308 cps           | 13.5 %        |
| 141Pr (KED) | 0.000 ppb             | 72 cps            | 26.2 %        |
| 142Nd (KED) | 0.000 ppb             | 72 cps            | 21.8 %        |
| 152Sm (KED) | 0.000 ppb             | 20 cps            | 28.9 %        |
| 153Eu (KED) | 0.000 ppb             | 48 cps            | 20.1 %        |
| 158Gd (KED) | 0.000 ppb             | 33 cps            | 40.0 %        |
| 159Tb (KED) | 100.000 %             | 4,305,801 cps     | 2.2 %         |
| 164Dy (KED) | 0.000 ppb             | 39 cps            | 13.1 %        |
| 166Er (KED) | 0.000 ppb             | 280 cps           | 11.4 %        |
| 169Tm (KED) | 0.000 ppb             | 66 cps            | 30.6 %        |
| 174Yb (KED) | 0.000 ppb             | 41 cps            | 12.4 %        |
| 175Lu (KED) | 0.005 ppb             | 18,174 cps        | 3.5 %         |
| 205Tl (KED) | 0.000 ppb             | 58 cps            | 29.6 %        |
| 208Pb (KED) | 0.000 ppb             | 33,424 cps        | 1.8 %         |
| 209Bi (KED) | 100.000 %             | 3,856,025 cps     | 1.6 %         |
| 232Th (KED) | 0.000 ppb             | 2,496 cps         | 2.8 %         |
| 238U (KED)  | 0.000 ppb             | 992 cps           | 7.7 %         |

## Sample Summary

Instrument ID: iCAP Q

Analysis index: 3

Analysis name: 0+20

Analysis started at: 9/30/2021 2:34:10 PM

User name: WINDOWS-UPCI4ER\Administrator

| Category    | Concentration average | Concentration RSD |
|-------------|-----------------------|-------------------|
| 6Li (KED)   | 93.533 %              |                   |
| 9Be (KED)   | 0.000 ppb             |                   |
| 11B (KED)   | 0.000 ppb             | 0.0 %             |
| 24Mg (KED)  | 0.000 ppb             | 0.1 %             |
| 27Al (KED)  | 0.000 ppb             | 0.1 %             |
| 45Sc (KED)  | 98.907 %              |                   |
| 51V (KED)   | 0.000 ppb             | 0.4 %             |
| 52Cr (KED)  | 0.000 ppb             | 0.1 %             |
| 55Mn (KED)  | 0.000 ppb             | 0.1 %             |
| 56Fe (KED)  | 0.000 ppb             | 0.0 %             |
| 58Ni (KED)  | 0.000 ppb             | 0.1 %             |
| 59Co (KED)  | 0.000 ppb             | 0.1 %             |
| 63Cu (KED)  | 0.000 ppb             | 0.1 %             |
| 64Zn (KED)  | 0.000 ppb             | 0.0 %             |
| 69Ga (KED)  | 0.000 ppb             | 0.2 %             |
| 75As (KED)  | 0.000 ppb             | 0.4 %             |
| 80Se (KED)  | 0.000 ppb             | 0.1 %             |
| 85Rb (KED)  | 0.000 ppb             | 0.2 %             |
| 88Sr (KED)  | 0.000 ppb             | 0.1 %             |
| 89Y (KED)   | 98.165 %              |                   |
| 107Ag (KED) | 0.000 ppb             | 0.0 %             |
| 114Cd (KED) | 0.000 ppb             | 0.3 %             |
| 115In (KED) | 99.552 %              |                   |
| 133Cs (KED) | 0.000 ppb             | 0.2 %             |
| 138Ba (KED) | 0.000 ppb             | 0.0 %             |
| 139La (KED) | 0.000 ppb             | 0.3 %             |
| 140Ce (KED) | 0.000 ppb             | 0.1 %             |
| 141Pr (KED) | 0.000 ppb             | 0.0 %             |
| 142Nd (KED) | 0.000 ppb             | 0.3 %             |
| 152Sm (KED) | 0.000 ppb             | 0.3 %             |
| 153Eu (KED) | 0.000 ppb             | 0.5 %             |
| 158Gd (KED) | 0.000 ppb             | 0.2 %             |
| 159Tb (KED) | 98.527 %              |                   |
| 164Dy (KED) | 0.000 ppb             | 0.2 %             |
| 166Er (KED) | 0.000 ppb             | 0.1 %             |
| 169Tm (KED) | 0.000 ppb             | 0.1 %             |
| 174Yb (KED) | 0.000 ppb             | 0.3 %             |
| 175Lu (KED) | 0.000 ppb             | 0.0 %             |
| 205Tl (KED) | 0.000 ppb             | 0.1 %             |
| 208Pb (KED) | 0.000 ppb             | 0.0 %             |
| 209Bi (KED) | 99.958 %              |                   |
| 232Th (KED) | 0.000 ppb             | 0.1 %             |
| 238U (KED)  | 0.000 ppb             | 0.1 %             |

| Category   | Concentration average | Intensity average | Intensity RSD |
|------------|-----------------------|-------------------|---------------|
| 6Li (KED)  | 93.533 %              | 2,588 cps         | 1.8 %         |
| 9Be (KED)  | 0.000 ppb             | 0 cps             |               |
| 11B (KED)  | 0.000 ppb             | 1,623 cps         | 3.0 %         |
| 24Mg (KED) | 0.000 ppb             | 458 cps           | 7.5 %         |
| 27Al (KED) | 0.000 ppb             | 146 cps           | 9.5 %         |

| Category    | Concentration average | Intensity average | Intensity RSD |
|-------------|-----------------------|-------------------|---------------|
| 45Sc (KED)  | 98.907 %              | 43,613 cps        | 0.8 %         |
| 51V (KED)   | 0.000 ppb             | 21 cps            | 39.7 %        |
| 52Cr (KED)  | 0.000 ppb             | 181 cps           | 15.4 %        |
| 55Mn (KED)  | 0.000 ppb             | 339 cps           | 9.1 %         |
| 56Fe (KED)  | 0.000 ppb             | 6,208 cps         | 4.7 %         |
| 58Ni (KED)  | 0.000 ppb             | 439 cps           | 6.9 %         |
| 59Co (KED)  | 0.000 ppb             | 74 cps            | 10.3 %        |
| 63Cu (KED)  | 0.000 ppb             | 740 cps           | 11.3 %        |
| 64Zn (KED)  | 0.000 ppb             | 1,580 cps         | 3.9 %         |
| 69Ga (KED)  | 0.000 ppb             | 111 cps           | 23.3 %        |
| 75As (KED)  | 0.000 ppb             | 18 cps            | 39.0 %        |
| 80Se (KED)  | 0.000 ppb             | 1,439 cps         | 5.9 %         |
| 85Rb (KED)  | 0.000 ppb             | 34 cps            | 22.3 %        |
| 88Sr (KED)  | 0.000 ppb             | 219 cps           | 10.8 %        |
| 89Y (KED)   | 98.165 %              | 410,848 cps       | 0.4 %         |
| 107Ag (KED) | 0.000 ppb             | 93 cps            | 0.0 %         |
| 114Cd (KED) | 0.000 ppb             | 73 cps            | 27.6 %        |
| 115In (KED) | 99.552 %              | 790,853 cps       | 0.2 %         |
| 133Cs (KED) | 0.000 ppb             | 88 cps            | 15.8 %        |
| 138Ba (KED) | 0.000 ppb             | 2,600 cps         | 4.4 %         |
| 139La (KED) | 0.000 ppb             | 97 cps            | 30.6 %        |
| 140Ce (KED) | 0.000 ppb             | 300 cps           | 7.8 %         |
| 141Pr (KED) | 0.000 ppb             | 62 cps            | 3.1 %         |
| 142Nd (KED) | 0.000 ppb             | 74 cps            | 29.1 %        |
| 152Sm (KED) | 0.000 ppb             | 12 cps            | 31.5 %        |
| 153Eu (KED) | 0.000 ppb             | 28 cps            | 45.4 %        |
| 158Gd (KED) | 0.000 ppb             | 36 cps            | 19.5 %        |
| 159Tb (KED) | 98.527 %              | 4,242,374 cps     | 0.2 %         |
| 164Dy (KED) | 0.000 ppb             | 30 cps            | 19.2 %        |
| 166Er (KED) | 0.000 ppb             | 282 cps           | 10.0 %        |
| 169Tm (KED) | 0.000 ppb             | 63 cps            | 5.3 %         |
| 174Yb (KED) | 0.000 ppb             | 40 cps            | 25.0 %        |
| 175Lu (KED) | 0.000 ppb             | 17,075 cps        | 3.2 %         |
| 205Tl (KED) | 0.000 ppb             | 56 cps            | 9.2 %         |
| 208Pb (KED) | 0.000 ppb             | 33,449 cps        | 0.2 %         |
| 209Bi (KED) | 99.958 %              | 3,854,397 cps     | 1.1 %         |
| 232Th (KED) | 0.000 ppb             | 2,386 cps         | 7.9 %         |
| 238U (KED)  | 0.000 ppb             | 1,029 cps         | 8.1 %         |

## Sample Summary

Instrument ID: iCAP Q

Analysis index: 4

Analysis name: 50+20

Analysis started at: 9/30/2021 2:39:15 PM

User name: WINDOWS-UPCI4ER\Administrator

| Category    | Concentration average | Concentration RSD |
|-------------|-----------------------|-------------------|
| 6Li (KED)   | 99.719 %              |                   |
| 9Be (KED)   | 69.809 ppb            | 2.2 %             |
| 11B (KED)   | 96.329 ppb            | 3.8 %             |
| 24Mg (KED)  | 68.540 ppb            | 3.8 %             |
| 27Al (KED)  | 67.397 ppb            | 1.7 %             |
| 45Sc (KED)  | 101.881 %             |                   |
| 51V (KED)   | 67.798 ppb            | 0.5 %             |
| 52Cr (KED)  | 68.070 ppb            | 0.4 %             |
| 55Mn (KED)  | 68.420 ppb            | 1.1 %             |
| 56Fe (KED)  | 68.263 ppb            | 0.8 %             |
| 58Ni (KED)  | 68.450 ppb            | 1.6 %             |
| 59Co (KED)  | 69.398 ppb            | 0.9 %             |
| 63Cu (KED)  | 69.098 ppb            | 1.7 %             |
| 64Zn (KED)  | 68.895 ppb            | 0.3 %             |
| 69Ga (KED)  | 68.921 ppb            | 0.2 %             |
| 75As (KED)  | 68.446 ppb            | 1.3 %             |
| 80Se (KED)  | 68.764 ppb            | 2.5 %             |
| 85Rb (KED)  | 68.659 ppb            | 1.0 %             |
| 88Sr (KED)  | 67.896 ppb            | 0.9 %             |
| 89Y (KED)   | 104.824 %             |                   |
| 107Ag (KED) | 68.438 ppb            | 1.1 %             |
| 114Cd (KED) | 68.967 ppb            | 0.5 %             |
| 115In (KED) | 106.366 %             |                   |
| 133Cs (KED) | 68.786 ppb            | 1.6 %             |
| 138Ba (KED) | 69.098 ppb            | 0.5 %             |
| 139La (KED) | 68.625 ppb            | 0.6 %             |
| 140Ce (KED) | 67.930 ppb            | 0.1 %             |
| 141Pr (KED) | 68.525 ppb            | 0.3 %             |
| 142Nd (KED) | 68.721 ppb            | 1.1 %             |
| 152Sm (KED) | 67.542 ppb            | 0.2 %             |
| 153Eu (KED) | 67.834 ppb            | 1.2 %             |
| 158Gd (KED) | 68.854 ppb            | 0.6 %             |
| 159Tb (KED) | 107.063 %             |                   |
| 164Dy (KED) | 68.383 ppb            | 0.8 %             |
| 166Er (KED) | 69.204 ppb            | 1.4 %             |
| 169Tm (KED) | 69.305 ppb            | 0.7 %             |
| 174Yb (KED) | 68.587 ppb            | 1.8 %             |
| 175Lu (KED) | 69.287 ppb            | 1.0 %             |
| 205Tl (KED) | 68.917 ppb            | 2.2 %             |
| 208Pb (KED) | 68.454 ppb            | 0.9 %             |
| 209Bi (KED) | 105.588 %             |                   |
| 232Th (KED) | 68.045 ppb            | 0.8 %             |
| 238U (KED)  | 68.444 ppb            | 0.5 %             |

| Category   | Concentration average | Intensity average | Intensity RSD |
|------------|-----------------------|-------------------|---------------|
| 6Li (KED)  | 99.719 %              | 2,759 cps         | 2.6 %         |
| 9Be (KED)  | 69.809 ppb            | 8,695 cps         | 2.8 %         |
| 11B (KED)  | 96.329 ppb            | 8,849 cps         | 2.0 %         |
| 24Mg (KED) | 68.540 ppb            | 34,521 cps        | 1.7 %         |
| 27Al (KED) | 67.397 ppb            | 9,390 cps         | 3.8 %         |

| Category    | Concentration average | Intensity average | Intensity RSD |
|-------------|-----------------------|-------------------|---------------|
| 45Sc (KED)  | 101.881 %             | 44,924 cps        | 2.3 %         |
| 51V (KED)   | 67.798 ppb            | 499,536 cps       | 2.0 %         |
| 52Cr (KED)  | 68.070 ppb            | 770,033 cps       | 2.0 %         |
| 55Mn (KED)  | 68.420 ppb            | 422,013 cps       | 1.3 %         |
| 56Fe (KED)  | 68.263 ppb            | 731,728 cps       | 1.6 %         |
| 58Ni (KED)  | 68.450 ppb            | 879,017 cps       | 1.8 %         |
| 59Co (KED)  | 69.398 ppb            | 1,508,599 cps     | 2.5 %         |
| 63Cu (KED)  | 69.098 ppb            | 1,078,682 cps     | 1.7 %         |
| 64Zn (KED)  | 68.895 ppb            | 298,018 cps       | 1.2 %         |
| 69Ga (KED)  | 68.921 ppb            | 399,560 cps       | 0.9 %         |
| 75As (KED)  | 68.446 ppb            | 87,049 cps        | 1.0 %         |
| 80Se (KED)  | 68.764 ppb            | 28,738 cps        | 2.5 %         |
| 85Rb (KED)  | 68.659 ppb            | 403,300 cps       | 0.8 %         |
| 88Sr (KED)  | 67.896 ppb            | 587,569 cps       | 1.8 %         |
| 89Y (KED)   | 104.824 %             | 438,716 cps       | 1.0 %         |
| 107Ag (KED) | 68.438 ppb            | 3,456,463 cps     | 1.3 %         |
| 114Cd (KED) | 68.967 ppb            | 1,302,798 cps     | 1.8 %         |
| 115In (KED) | 106.366 %             | 844,983 cps       | 2.1 %         |
| 133Cs (KED) | 68.786 ppb            | 2,170,143 cps     | 0.7 %         |
| 138Ba (KED) | 69.098 ppb            | 3,088,090 cps     | 0.8 %         |
| 139La (KED) | 68.625 ppb            | 6,108,610 cps     | 0.6 %         |
| 140Ce (KED) | 67.930 ppb            | 8,040,402 cps     | 1.0 %         |
| 141Pr (KED) | 68.525 ppb            | 8,765,117 cps     | 1.3 %         |
| 142Nd (KED) | 68.721 ppb            | 3,480,566 cps     | 0.2 %         |
| 152Sm (KED) | 67.542 ppb            | 3,206,045 cps     | 1.0 %         |
| 153Eu (KED) | 67.834 ppb            | 6,539,044 cps     | 1.8 %         |
| 158Gd (KED) | 68.854 ppb            | 4,334,728 cps     | 0.8 %         |
| 159Tb (KED) | 107.063 %             | 4,609,898 cps     | 1.1 %         |
| 164Dy (KED) | 68.383 ppb            | 5,120,531 cps     | 1.6 %         |
| 166Er (KED) | 69.204 ppb            | 6,161,340 cps     | 1.9 %         |
| 169Tm (KED) | 69.305 ppb            | 20,538,237 cps    | 1.5 %         |
| 174Yb (KED) | 68.587 ppb            | 7,353,776 cps     | 2.9 %         |
| 175Lu (KED) | 69.287 ppb            | 12,878,764 cps    | 1.2 %         |
| 205Tl (KED) | 68.917 ppb            | 14,527,323 cps    | 2.1 %         |
| 208Pb (KED) | 68.454 ppb            | 10,222,444 cps    | 0.3 %         |
| 209Bi (KED) | 105.588 %             | 4,071,515 cps     | 0.6 %         |
| 232Th (KED) | 68.045 ppb            | 21,619,906 cps    | 0.4 %         |
| 238U (KED)  | 68.444 ppb            | 24,925,418 cps    | 0.7 %         |

# Comprehensive

9/30/2021 3:05:13 PM

## Sample Summary

Instrument ID: iCAP Q

Analysis index: 5

Analysis name: 100+20

Analysis started at: 9/30/2021 2:44:27 PM

User name: WINDOWS-UPCI4ER\Administrator

| Category    | Concentration average | Concentration RSD |
|-------------|-----------------------|-------------------|
| 6Li (KED)   | 97.992 %              |                   |
| 9Be (KED)   | 103.893 ppb           | 2.0 %             |
| 11B (KED)   | 84.003 ppb            | 2.4 %             |
| 24Mg (KED)  | 104.845 ppb           | 2.9 %             |
| 27Al (KED)  | 105.702 ppb           | 2.5 %             |
| 45Sc (KED)  | 99.274 %              |                   |
| 51V (KED)   | 105.402 ppb           | 0.9 %             |
| 52Cr (KED)  | 105.198 ppb           | 0.7 %             |
| 55Mn (KED)  | 104.935 ppb           | 1.6 %             |
| 56Fe (KED)  | 105.053 ppb           | 1.5 %             |
| 58Ni (KED)  | 104.913 ppb           | 1.7 %             |
| 59Co (KED)  | 104.202 ppb           | 2.0 %             |
| 63Cu (KED)  | 104.426 ppb           | 0.1 %             |
| 64Zn (KED)  | 104.579 ppb           | 0.6 %             |
| 69Ga (KED)  | 104.559 ppb           | 1.0 %             |
| 75As (KED)  | 104.916 ppb           | 1.8 %             |
| 80Se (KED)  | 104.677 ppb           | 1.1 %             |
| 85Rb (KED)  | 104.756 ppb           | 1.4 %             |
| 88Sr (KED)  | 105.328 ppb           | 0.5 %             |
| 89Y (KED)   | 103.061 %             |                   |
| 107Ag (KED) | 104.921 ppb           | 1.8 %             |
| 114Cd (KED) | 104.525 ppb           | 1.7 %             |
| 115In (KED) | 104.845 %             |                   |
| 133Cs (KED) | 104.661 ppb           | 2.2 %             |
| 138Ba (KED) | 104.427 ppb           | 2.3 %             |
| 139La (KED) | 104.781 ppb           | 3.0 %             |
| 140Ce (KED) | 105.302 ppb           | 1.9 %             |
| 141Pr (KED) | 104.856 ppb           | 4.0 %             |
| 142Nd (KED) | 104.710 ppb           | 2.3 %             |
| 152Sm (KED) | 105.594 ppb           | 2.1 %             |
| 153Eu (KED) | 105.375 ppb           | 2.3 %             |
| 158Gd (KED) | 104.609 ppb           | 4.2 %             |
| 159Tb (KED) | 105.647 %             |                   |
| 164Dy (KED) | 104.963 ppb           | 1.3 %             |
| 166Er (KED) | 104.347 ppb           | 3.4 %             |
| 169Tm (KED) | 104.271 ppb           | 2.1 %             |
| 174Yb (KED) | 104.810 ppb           | 2.7 %             |
| 175Lu (KED) | 104.285 ppb           | 3.2 %             |
| 205Tl (KED) | 104.562 ppb           | 2.3 %             |
| 208Pb (KED) | 104.910 ppb           | 0.5 %             |
| 209Bi (KED) | 103.975 %             |                   |
| 232Th (KED) | 105.217 ppb           | 2.6 %             |
| 238U (KED)  | 104.917 ppb           | 2.3 %             |

| Category   | Concentration average | Intensity average | Intensity RSD |
|------------|-----------------------|-------------------|---------------|
| 6Li (KED)  | 97.992 %              | 2,711 cps         | 3.7 %         |
| 9Be (KED)  | 103.893 ppb           | 12,712 cps        | 1.8 %         |
| 11B (KED)  | 84.003 ppb            | 7,802 cps         | 3.6 %         |
| 24Mg (KED) | 104.845 ppb           | 51,632 cps        | 1.0 %         |
| 27Al (KED) | 105.702 ppb           | 14,264 cps        | 2.6 %         |

| Category    | Concentration average | Intensity average | Intensity RSD |
|-------------|-----------------------|-------------------|---------------|
| 45Sc (KED)  | 99.274 %              | 43,774 cps        | 1.3 %         |
| 51V (KED)   | 105.402 ppb           | 756,741 cps       | 1.5 %         |
| 52Cr (KED)  | 105.198 ppb           | 1,159,612 cps     | 2.0 %         |
| 55Mn (KED)  | 104.935 ppb           | 630,679 cps       | 2.9 %         |
| 56Fe (KED)  | 105.053 ppb           | 1,094,155 cps     | 2.7 %         |
| 58Ni (KED)  | 104.913 ppb           | 1,312,837 cps     | 2.6 %         |
| 59Co (KED)  | 104.202 ppb           | 2,207,546 cps     | 3.3 %         |
| 63Cu (KED)  | 104.426 ppb           | 1,602,438 cps     | 1.8 %         |
| 64Zn (KED)  | 104.579 ppb           | 443,921 cps       | 2.1 %         |
| 69Ga (KED)  | 104.559 ppb           | 595,946 cps       | 2.3 %         |
| 75As (KED)  | 104.916 ppb           | 131,213 cps       | 3.6 %         |
| 80Se (KED)  | 104.677 ppb           | 42,227 cps        | 2.7 %         |
| 85Rb (KED)  | 104.756 ppb           | 605,014 cps       | 2.5 %         |
| 88Sr (KED)  | 105.328 ppb           | 896,059 cps       | 2.2 %         |
| 89Y (KED)   | 103.061 %             | 431,340 cps       | 1.8 %         |
| 107Ag (KED) | 104.921 ppb           | 5,224,378 cps     | 2.9 %         |
| 114Cd (KED) | 104.525 ppb           | 1,946,460 cps     | 2.8 %         |
| 115In (KED) | 104.845 %             | 832,902 cps       | 1.6 %         |
| 133Cs (KED) | 104.661 ppb           | 3,255,724 cps     | 3.2 %         |
| 138Ba (KED) | 104.427 ppb           | 4,602,559 cps     | 2.0 %         |
| 139La (KED) | 104.781 ppb           | 9,200,397 cps     | 2.3 %         |
| 140Ce (KED) | 105.302 ppb           | 12,295,579 cps    | 1.8 %         |
| 141Pr (KED) | 104.856 ppb           | 13,225,777 cps    | 2.0 %         |
| 142Nd (KED) | 104.710 ppb           | 5,232,033 cps     | 2.1 %         |
| 152Sm (KED) | 105.594 ppb           | 4,944,869 cps     | 2.3 %         |
| 153Eu (KED) | 105.375 ppb           | 10,019,285 cps    | 1.0 %         |
| 158Gd (KED) | 104.609 ppb           | 6,502,138 cps     | 6.4 %         |
| 159Tb (KED) | 105.647 %             | 4,548,966 cps     | 2.8 %         |
| 164Dy (KED) | 104.963 ppb           | 7,754,150 cps     | 2.1 %         |
| 166Er (KED) | 104.347 ppb           | 9,163,116 cps     | 2.6 %         |
| 169Tm (KED) | 104.271 ppb           | 30,494,663 cps    | 4.0 %         |
| 174Yb (KED) | 104.810 ppb           | 11,082,653 cps    | 1.3 %         |
| 175Lu (KED) | 104.285 ppb           | 19,114,171 cps    | 3.3 %         |
| 205Tl (KED) | 104.562 ppb           | 21,697,554 cps    | 3.2 %         |
| 208Pb (KED) | 104.910 ppb           | 15,407,142 cps    | 3.4 %         |
| 209Bi (KED) | 103.975 %             | 4,009,305 cps     | 3.9 %         |
| 232Th (KED) | 105.217 ppb           | 32,899,602 cps    | 2.0 %         |
| 238U (KED)  | 104.917 ppb           | 37,622,367 cps    | 4.4 %         |

# Comprehensive

9/30/2021 3:05:13 PM

## Sample Summary

Instrument ID: iCAP Q

Analysis index: 6

Analysis name: 179184jian

Analysis started at: 9/30/2021 2:49:27 PM

User name: WINDOWS-UPCI4ER\Administrator

| Category    | Concentration average | Concentration RSD |
|-------------|-----------------------|-------------------|
| 6Li (KED)   | 108.515 %             | 1.2 %             |
| 9Be (KED)   | 0.074 ppb             | 67.6 %            |
| 11B (KED)   | -14.338 ppb           | 3.3 %             |
| 24Mg (KED)  | 759.221 ppb           | 1.4 %             |
| 27Al (KED)  | 885.012 ppb           | 0.7 %             |
| 45Sc (KED)  | 107.486 %             | 1.2 %             |
| 51V (KED)   | 1.712 ppb             | 0.8 %             |
| 52Cr (KED)  | 4.669 ppb             | 1.4 %             |
| 55Mn (KED)  | 24.228 ppb            | 0.9 %             |
| 56Fe (KED)  | 1,162.443 ppb         | 1.0 %             |
| 58Ni (KED)  | 5.456 ppb             | 1.1 %             |
| 59Co (KED)  | 0.480 ppb             | 0.9 %             |
| 63Cu (KED)  | 8.431 ppb             | 0.8 %             |
| 64Zn (KED)  | 156.309 ppb           | 1.0 %             |
| 69Ga (KED)  | 1.824 ppb             | 1.3 %             |
| 75As (KED)  | 0.678 ppb             | 6.3 %             |
| 80Se (KED)  | -0.302 ppb            | 8.5 %             |
| 85Rb (KED)  | 2.668 ppb             | 2.0 %             |
| 88Sr (KED)  | 10.459 ppb            | 0.4 %             |
| 89Y (KED)   | 107.130 %             | 1.0 %             |
| 107Ag (KED) | 0.192 ppb             | 3.9 %             |
| 114Cd (KED) | 0.041 ppb             | 3.6 %             |
| 115In (KED) | 104.225 %             | 1.5 %             |
| 133Cs (KED) | 0.209 ppb             | 1.3 %             |
| 138Ba (KED) | 7.446 ppb             | 1.4 %             |
| 139La (KED) | 0.812 ppb             | 2.0 %             |
| 140Ce (KED) | 1.654 ppb             | 1.3 %             |
| 141Pr (KED) | 0.207 ppb             | 2.6 %             |
| 142Nd (KED) | 1.071 ppb             | 2.1 %             |
| 152Sm (KED) | 0.163 ppb             | 1.5 %             |
| 153Eu (KED) | 0.035 ppb             | 7.3 %             |
| 158Gd (KED) | 0.145 ppb             | 3.3 %             |
| 159Tb (KED) | 112.933 %             | 1.7 %             |
| 164Dy (KED) | 0.103 ppb             | 1.8 %             |
| 166Er (KED) | 0.055 ppb             | 4.6 %             |
| 169Tm (KED) | 0.012 ppb             | 13.9 %            |
| 174Yb (KED) | 0.044 ppb             | 4.7 %             |
| 175Lu (KED) | 0.014 ppb             | 19.3 %            |
| 205Tl (KED) | 0.024 ppb             | 8.8 %             |
| 208Pb (KED) | 1.469 ppb             | 1.2 %             |
| 209Bi (KED) | 95.297 %              | 1.0 %             |
| 232Th (KED) | 0.408 ppb             | 17.3 %            |
| 238U (KED)  | 0.100 ppb             | 3.3 %             |

| Category   | Concentration average | Intensity average | Intensity RSD |
|------------|-----------------------|-------------------|---------------|
| 6Li (KED)  | 108.515 %             | 3,003 cps         | 1.2 %         |
| 9Be (KED)  | 0.074 ppb             | 10 cps            | 66.7 %        |
| 11B (KED)  | -14.338 ppb           | 730 cps           | 6.3 %         |
| 24Mg (KED) | 759.221 ppb           | 410,999 cps       | 1.4 %         |
| 27Al (KED) | 885.012 ppb           | 128,151 cps       | 2.0 %         |

| Category    | Concentration average | Intensity average | Intensity RSD |
|-------------|-----------------------|-------------------|---------------|
| 45Sc (KED)  | 107.486 %             | 47,395 cps        | 1.2 %         |
| 51V (KED)   | 1.712 ppb             | 13,328 cps        | 2.0 %         |
| 52Cr (KED)  | 4.669 ppb             | 55,907 cps        | 2.1 %         |
| 55Mn (KED)  | 24.228 ppb            | 157,926 cps       | 1.8 %         |
| 56Fe (KED)  | 1,162.443 ppb         | 13,038,397 cps    | 0.6 %         |
| 58Ni (KED)  | 5.456 ppb             | 74,365 cps        | 0.9 %         |
| 59Co (KED)  | 0.480 ppb             | 11,095 cps        | 1.6 %         |
| 63Cu (KED)  | 8.431 ppb             | 135,227 cps       | 1.6 %         |
| 64Zn (KED)  | 156.309 ppb           | 688,796 cps       | 0.9 %         |
| 69Ga (KED)  | 1.824 ppb             | 10,927 cps        | 1.3 %         |
| 75As (KED)  | 0.678 ppb             | 900 cps           | 5.1 %         |
| 80Se (KED)  | -0.302 ppb            | 1,448 cps         | 1.0 %         |
| 85Rb (KED)  | 2.668 ppb             | 16,049 cps        | 1.1 %         |
| 88Sr (KED)  | 10.459 ppb            | 92,701 cps        | 0.9 %         |
| 89Y (KED)   | 107.130 %             | 448,369 cps       | 1.0 %         |
| 107Ag (KED) | 0.192 ppb             | 9,614 cps         | 3.1 %         |
| 114Cd (KED) | 0.041 ppb             | 832 cps           | 2.0 %         |
| 115In (KED) | 104.225 %             | 827,975 cps       | 1.5 %         |
| 133Cs (KED) | 0.209 ppb             | 6,542 cps         | 0.9 %         |
| 138Ba (KED) | 7.446 ppb             | 353,665 cps       | 1.2 %         |
| 139La (KED) | 0.812 ppb             | 76,385 cps        | 1.0 %         |
| 140Ce (KED) | 1.654 ppb             | 206,758 cps       | 0.7 %         |
| 141Pr (KED) | 0.207 ppb             | 28,055 cps        | 1.0 %         |
| 142Nd (KED) | 1.071 ppb             | 57,307 cps        | 0.4 %         |
| 152Sm (KED) | 0.163 ppb             | 8,157 cps         | 2.5 %         |
| 153Eu (KED) | 0.035 ppb             | 3,611 cps         | 8.6 %         |
| 158Gd (KED) | 0.145 ppb             | 9,669 cps         | 4.2 %         |
| 159Tb (KED) | 112.933 %             | 4,862,681 cps     | 1.7 %         |
| 164Dy (KED) | 0.103 ppb             | 8,167 cps         | 1.4 %         |
| 166Er (KED) | 0.055 ppb             | 5,515 cps         | 3.7 %         |
| 169Tm (KED) | 0.012 ppb             | 3,843 cps         | 13.7 %        |
| 174Yb (KED) | 0.044 ppb             | 5,068 cps         | 3.8 %         |
| 175Lu (KED) | 0.014 ppb             | 22,303 cps        | 2.7 %         |
| 205Tl (KED) | 0.024 ppb             | 4,706 cps         | 8.7 %         |
| 208Pb (KED) | 1.469 ppb             | 229,222 cps       | 0.9 %         |
| 209Bi (KED) | 95.297 %              | 3,674,683 cps     | 1.0 %         |
| 232Th (KED) | 0.408 ppb             | 119,212 cps       | 17.0 %        |
| 238U (KED)  | 0.100 ppb             | 33,740 cps        | 2.9 %         |

# Comprehensive

9/30/2021 3:05:13 PM

## Sample Summary

Instrument ID: iCAP Q

Analysis index: 7

Analysis name: 033915(179178)jian

Analysis started at: 9/30/2021 2:54:21 PM

User name: WINDOWS-UPCI4ER\Administrator

| Category    | Concentration average | Concentration RSD |
|-------------|-----------------------|-------------------|
| 6Li (KED)   | 108.997 %             | 3.9 %             |
| 9Be (KED)   | 0.033 ppb             | 42.6 %            |
| 11B (KED)   | -18.104 ppb           | 2.6 %             |
| 24Mg (KED)  | 531.505 ppb           | 3.7 %             |
| 27Al (KED)  | 738.261 ppb           | 0.7 %             |
| 45Sc (KED)  | 104.929 %             | 0.9 %             |
| 51V (KED)   | 1.450 ppb             | 1.1 %             |
| 52Cr (KED)  | 2.783 ppb             | 0.8 %             |
| 55Mn (KED)  | 19.146 ppb            | 2.5 %             |
| 56Fe (KED)  | 828.033 ppb           | 1.1 %             |
| 58Ni (KED)  | 3.953 ppb             | 2.2 %             |
| 59Co (KED)  | 0.346 ppb             | 3.5 %             |
| 63Cu (KED)  | 7.799 ppb             | 0.9 %             |
| 64Zn (KED)  | 144.633 ppb           | 1.3 %             |
| 69Ga (KED)  | 1.531 ppb             | 1.5 %             |
| 75As (KED)  | 0.567 ppb             | 3.9 %             |
| 80Se (KED)  | 0.131 ppb             | 193.5 %           |
| 85Rb (KED)  | 1.900 ppb             | 3.3 %             |
| 88Sr (KED)  | 6.705 ppb             | 1.1 %             |
| 89Y (KED)   | 103.200 %             | 0.5 %             |
| 107Ag (KED) | 0.047 ppb             | 1.6 %             |
| 114Cd (KED) | 0.048 ppb             | 5.1 %             |
| 115In (KED) | 99.216 %              | 1.5 %             |
| 133Cs (KED) | 0.158 ppb             | 3.9 %             |
| 138Ba (KED) | 6.085 ppb             | 1.4 %             |
| 139La (KED) | 0.613 ppb             | 1.4 %             |
| 140Ce (KED) | 1.269 ppb             | 1.3 %             |
| 141Pr (KED) | 0.148 ppb             | 3.0 %             |
| 142Nd (KED) | 0.801 ppb             | 0.8 %             |
| 152Sm (KED) | 0.116 ppb             | 1.2 %             |
| 153Eu (KED) | 0.023 ppb             | 5.2 %             |
| 158Gd (KED) | 0.103 ppb             | 2.6 %             |
| 159Tb (KED) | 106.651 %             | 1.4 %             |
| 164Dy (KED) | 0.075 ppb             | 2.6 %             |
| 166Er (KED) | 0.039 ppb             | 4.5 %             |
| 169Tm (KED) | 0.005 ppb             | 5.7 %             |
| 174Yb (KED) | 0.031 ppb             | 5.6 %             |
| 175Lu (KED) | 0.002 ppb             | 46.6 %            |
| 205Tl (KED) | 0.017 ppb             | 1.7 %             |
| 208Pb (KED) | 0.884 ppb             | 2.2 %             |
| 209Bi (KED) | 91.957 %              | 0.9 %             |
| 232Th (KED) | 0.230 ppb             | 2.5 %             |
| 238U (KED)  | 0.058 ppb             | 0.4 %             |

| Category   | Concentration average | Intensity average | Intensity RSD |
|------------|-----------------------|-------------------|---------------|
| 6Li (KED)  | 108.997 %             | 3,016 cps         | 3.9 %         |
| 9Be (KED)  | 0.033 ppb             | 4 cps             | 43.3 %        |
| 11B (KED)  | -18.104 ppb           | 429 cps           | 10.8 %        |
| 24Mg (KED) | 531.505 ppb           | 288,917 cps       | 1.0 %         |
| 27Al (KED) | 738.261 ppb           | 104,374 cps       | 0.3 %         |

| Category    | Concentration average | Intensity average | Intensity RSD |
|-------------|-----------------------|-------------------|---------------|
| 45Sc (KED)  | 104.929 %             | 46,268 cps        | 0.9 %         |
| 51V (KED)   | 1.450 ppb             | 11,024 cps        | 1.8 %         |
| 52Cr (KED)  | 2.783 ppb             | 32,616 cps        | 1.4 %         |
| 55Mn (KED)  | 19.146 ppb            | 121,894 cps       | 2.2 %         |
| 56Fe (KED)  | 828.033 ppb           | 9,069,174 cps     | 1.5 %         |
| 58Ni (KED)  | 3.953 ppb             | 52,720 cps        | 1.5 %         |
| 59Co (KED)  | 0.346 ppb             | 7,830 cps         | 3.7 %         |
| 63Cu (KED)  | 7.799 ppb             | 120,559 cps       | 1.4 %         |
| 64Zn (KED)  | 144.633 ppb           | 614,104 cps       | 1.3 %         |
| 69Ga (KED)  | 1.531 ppb             | 8,854 cps         | 2.0 %         |
| 75As (KED)  | 0.567 ppb             | 729 cps           | 3.4 %         |
| 80Se (KED)  | 0.131 ppb             | 1,563 cps         | 6.0 %         |
| 85Rb (KED)  | 1.900 ppb             | 11,024 cps        | 3.6 %         |
| 88Sr (KED)  | 6.705 ppb             | 57,325 cps        | 0.7 %         |
| 89Y (KED)   | 103.200 %             | 431,921 cps       | 0.5 %         |
| 107Ag (KED) | 0.047 ppb             | 2,312 cps         | 1.3 %         |
| 114Cd (KED) | 0.048 ppb             | 913 cps           | 4.4 %         |
| 115In (KED) | 99.216 %              | 788,182 cps       | 1.5 %         |
| 133Cs (KED) | 0.158 ppb             | 4,728 cps         | 5.2 %         |
| 138Ba (KED) | 6.085 ppb             | 273,461 cps       | 2.2 %         |
| 139La (KED) | 0.613 ppb             | 54,422 cps        | 0.6 %         |
| 140Ce (KED) | 1.269 ppb             | 149,969 cps       | 1.3 %         |
| 141Pr (KED) | 0.148 ppb             | 18,952 cps        | 2.6 %         |
| 142Nd (KED) | 0.801 ppb             | 40,472 cps        | 1.1 %         |
| 152Sm (KED) | 0.116 ppb             | 5,483 cps         | 1.9 %         |
| 153Eu (KED) | 0.023 ppb             | 2,241 cps         | 4.7 %         |
| 158Gd (KED) | 0.103 ppb             | 6,475 cps         | 1.5 %         |
| 159Tb (KED) | 106.651 %             | 4,592,169 cps     | 1.4 %         |
| 164Dy (KED) | 0.075 ppb             | 5,602 cps         | 3.9 %         |
| 166Er (KED) | 0.039 ppb             | 3,764 cps         | 4.2 %         |
| 169Tm (KED) | 0.005 ppb             | 1,680 cps         | 6.8 %         |
| 174Yb (KED) | 0.031 ppb             | 3,377 cps         | 4.9 %         |
| 175Lu (KED) | 0.002 ppb             | 18,836 cps        | 1.0 %         |
| 205Tl (KED) | 0.017 ppb             | 3,081 cps         | 2.1 %         |
| 208Pb (KED) | 0.884 ppb             | 145,326 cps       | 0.8 %         |
| 209Bi (KED) | 91.957 %              | 3,545,900 cps     | 0.9 %         |
| 232Th (KED) | 0.230 ppb             | 65,851 cps        | 3.2 %         |
| 238U (KED)  | 0.058 ppb             | 19,241 cps        | 0.6 %         |

# Comprehensive

9/30/2021 3:05:13 PM

## Sample Summary

Instrument ID: iCAP Q

Analysis index: 8

Analysis name: 046214(179142)jian

Analysis started at: 9/30/2021 2:59:11 PM

User name: WINDOWS-UPCI4ER\Administrator

| Category    | Concentration average | Concentration RSD |
|-------------|-----------------------|-------------------|
| 6Li (KED)   | 117.874 %             | 3.6 %             |
| 9Be (KED)   | 0.022 ppb             | 173.2 %           |
| 11B (KED)   | -12.661 ppb           | 13.6 %            |
| 24Mg (KED)  | 755.571 ppb           | 4.0 %             |
| 27Al (KED)  | 809.128 ppb           | 2.1 %             |
| 45Sc (KED)  | 115.331 %             | 3.7 %             |
| 51V (KED)   | 1.540 ppb             | 2.7 %             |
| 52Cr (KED)  | 2.965 ppb             | 1.7 %             |
| 55Mn (KED)  | 22.133 ppb            | 1.5 %             |
| 56Fe (KED)  | 983.406 ppb           | 1.9 %             |
| 58Ni (KED)  | 4.773 ppb             | 1.0 %             |
| 59Co (KED)  | 0.419 ppb             | 2.8 %             |
| 63Cu (KED)  | 11.983 ppb            | 0.1 %             |
| 64Zn (KED)  | 153.766 ppb           | 0.8 %             |
| 69Ga (KED)  | 2.000 ppb             | 2.4 %             |
| 75As (KED)  | 0.728 ppb             | 13.3 %            |
| 80Se (KED)  | -0.142 ppb            | 103.5 %           |
| 85Rb (KED)  | 3.242 ppb             | 1.5 %             |
| 88Sr (KED)  | 9.477 ppb             | 0.7 %             |
| 89Y (KED)   | 109.216 %             | 0.5 %             |
| 107Ag (KED) | 0.199 ppb             | 4.1 %             |
| 114Cd (KED) | 0.047 ppb             | 9.2 %             |
| 115In (KED) | 102.857 %             | 1.9 %             |
| 133Cs (KED) | 0.185 ppb             | 1.8 %             |
| 138Ba (KED) | 8.176 ppb             | 2.7 %             |
| 139La (KED) | 0.812 ppb             | 1.2 %             |
| 140Ce (KED) | 1.653 ppb             | 0.9 %             |
| 141Pr (KED) | 0.199 ppb             | 0.7 %             |
| 142Nd (KED) | 1.063 ppb             | 0.2 %             |
| 152Sm (KED) | 0.153 ppb             | 1.4 %             |
| 153Eu (KED) | 0.029 ppb             | 1.3 %             |
| 158Gd (KED) | 0.131 ppb             | 2.7 %             |
| 159Tb (KED) | 110.213 %             | 0.7 %             |
| 164Dy (KED) | 0.090 ppb             | 2.1 %             |
| 166Er (KED) | 0.043 ppb             | 1.9 %             |
| 169Tm (KED) | 0.006 ppb             | 3.8 %             |
| 174Yb (KED) | 0.038 ppb             | 3.1 %             |
| 175Lu (KED) | 0.008 ppb             | 56.3 %            |
| 205Tl (KED) | 0.018 ppb             | 2.3 %             |
| 208Pb (KED) | 1.412 ppb             | 1.4 %             |
| 209Bi (KED) | 91.702 %              | 0.9 %             |
| 232Th (KED) | 0.308 ppb             | 1.6 %             |
| 238U (KED)  | 0.079 ppb             | 1.9 %             |

| Category   | Concentration average | Intensity average | Intensity RSD |
|------------|-----------------------|-------------------|---------------|
| 6Li (KED)  | 117.874 %             | 3,262 cps         | 3.6 %         |
| 9Be (KED)  | 0.022 ppb             | 3 cps             | 173.2 %       |
| 11B (KED)  | -12.661 ppb           | 937 cps           | 13.6 %        |
| 24Mg (KED) | 755.571 ppb           | 443,954 cps       | 1.9 %         |
| 27Al (KED) | 809.128 ppb           | 125,661 cps       | 1.9 %         |

| Category    | Concentration average | Intensity average | Intensity RSD |
|-------------|-----------------------|-------------------|---------------|
| 45Sc (KED)  | 115.331 %             | 50,855 cps        | 3.7 %         |
| 51V (KED)   | 1.540 ppb             | 12,863 cps        | 1.2 %         |
| 52Cr (KED)  | 2.965 ppb             | 38,153 cps        | 2.0 %         |
| 55Mn (KED)  | 22.133 ppb            | 154,781 cps       | 2.6 %         |
| 56Fe (KED)  | 983.406 ppb           | 11,831,817 cps    | 1.8 %         |
| 58Ni (KED)  | 4.773 ppb             | 69,855 cps        | 2.7 %         |
| 59Co (KED)  | 0.419 ppb             | 10,380 cps        | 1.3 %         |
| 63Cu (KED)  | 11.983 ppb            | 195,586 cps       | 0.5 %         |
| 64Zn (KED)  | 153.766 ppb           | 690,851 cps       | 1.2 %         |
| 69Ga (KED)  | 2.000 ppb             | 12,202 cps        | 2.9 %         |
| 75As (KED)  | 0.728 ppb             | 984 cps           | 13.5 %        |
| 80Se (KED)  | -0.142 ppb            | 1,542 cps         | 4.1 %         |
| 85Rb (KED)  | 3.242 ppb             | 19,882 cps        | 2.0 %         |
| 88Sr (KED)  | 9.477 ppb             | 85,659 cps        | 1.3 %         |
| 89Y (KED)   | 109.216 %             | 457,097 cps       | 0.5 %         |
| 107Ag (KED) | 0.199 ppb             | 9,789 cps         | 2.2 %         |
| 114Cd (KED) | 0.047 ppb             | 933 cps           | 7.2 %         |
| 115In (KED) | 102.857 %             | 817,106 cps       | 1.9 %         |
| 133Cs (KED) | 0.185 ppb             | 5,737 cps         | 3.3 %         |
| 138Ba (KED) | 8.176 ppb             | 378,777 cps       | 3.3 %         |
| 139La (KED) | 0.812 ppb             | 74,532 cps        | 1.9 %         |
| 140Ce (KED) | 1.653 ppb             | 201,738 cps       | 0.7 %         |
| 141Pr (KED) | 0.199 ppb             | 26,238 cps        | 0.2 %         |
| 142Nd (KED) | 1.063 ppb             | 55,528 cps        | 1.0 %         |
| 152Sm (KED) | 0.153 ppb             | 7,486 cps         | 1.1 %         |
| 153Eu (KED) | 0.029 ppb             | 2,871 cps         | 1.9 %         |
| 158Gd (KED) | 0.131 ppb             | 8,512 cps         | 2.0 %         |
| 159Tb (KED) | 110.213 %             | 4,745,570 cps     | 0.7 %         |
| 164Dy (KED) | 0.090 ppb             | 6,963 cps         | 2.8 %         |
| 166Er (KED) | 0.043 ppb             | 4,230 cps         | 1.3 %         |
| 169Tm (KED) | 0.006 ppb             | 1,838 cps         | 3.9 %         |
| 174Yb (KED) | 0.038 ppb             | 4,206 cps         | 2.7 %         |
| 175Lu (KED) | 0.008 ppb             | 20,610 cps        | 3.4 %         |
| 205Tl (KED) | 0.018 ppb             | 3,394 cps         | 2.9 %         |
| 208Pb (KED) | 1.412 ppb             | 213,208 cps       | 0.6 %         |
| 209Bi (KED) | 91.702 %              | 3,536,070 cps     | 0.9 %         |
| 232Th (KED) | 0.308 ppb             | 87,045 cps        | 1.1 %         |
| 238U (KED)  | 0.079 ppb             | 25,773 cps        | 1.5 %         |
