# Supplementary material for: Geographic and breed-specific traceability of cashmere via mineral element profiling in Inner Mongolia (Ordos, Chifeng, and Alxa League)
Source: Royal Society of Chemistry journal article supplement (doi:10.1039/d5ra08122j), 2026-01-01
Supplement: d5ra08122j1.zip [file 20211009-min gai(1-24).pdf › ԭʼ޿/20211009-min gai(1-24).pdf]

## Instrument Summary:

Instrument ID: iCAP Q  
Serial Number: Undefined

## Labbook Summary:

Path and filename: \_Application Data\Workspace\LabBooks\wlw\20211009-1.imexp  
Labbook created by: Administrator  
Based on template:  
Hardware configuration: iCAPQ1  
Labbook type: eQuant  
Qtegra version (last saved): 2.7.2425.154  
Labbook started: 10/9/2021 3:13:54 PM  
Labbook finished: 10/9/2021 4:31:10 PM

## Method Summary:

| Isotope     | Mode | Dwell time (s) | # of Channels | Spacing | Resolution | IS          |
|-------------|------|----------------|---------------|---------|------------|-------------|
| 6Li (KED)   | KED  | 0.03           | 3             | 0.1     | Normal     |             |
| 9Be (KED)   | KED  | 0.03           | 3             | 0.1     | Normal     | 6Li (KED)   |
| 11B (KED)   | KED  | 0.03           | 3             | 0.1     | Normal     | 6Li (KED)   |
| 24Mg (KED)  | KED  | 0.03           | 3             | 0.1     | Normal     | 6Li (KED)   |
| 27Al (KED)  | KED  | 0.03           | 3             | 0.1     | Normal     | 45Sc (KED)  |
| 45Sc (KED)  | KED  | 0.03           | 3             | 0.1     | Normal     |             |
| 51V (KED)   | KED  | 0.03           | 3             | 0.1     | Normal     | 45Sc (KED)  |
| 52Cr (KED)  | KED  | 0.03           | 3             | 0.1     | Normal     | 45Sc (KED)  |
| 55Mn (KED)  | KED  | 0.03           | 3             | 0.1     | Normal     | 45Sc (KED)  |
| 56Fe (KED)  | KED  | 0.03           | 3             | 0.1     | Normal     | 45Sc (KED)  |
| 58Ni (KED)  | KED  | 0.03           | 3             | 0.1     | Normal     | 45Sc (KED)  |
| 59Co (KED)  | KED  | 0.03           | 3             | 0.1     | Normal     | 45Sc (KED)  |
| 63Cu (KED)  | KED  | 0.03           | 3             | 0.1     | Normal     | 89Y (KED)   |
| 64Zn (KED)  | KED  | 0.03           | 3             | 0.1     | Normal     | 89Y (KED)   |
| 69Ga (KED)  | KED  | 0.03           | 3             | 0.1     | Normal     | 89Y (KED)   |
| 75As (KED)  | KED  | 0.03           | 3             | 0.1     | Normal     | 89Y (KED)   |
| 80Se (KED)  | KED  | 0.03           | 3             | 0.1     | Normal     | 89Y (KED)   |
| 85Rb (KED)  | KED  | 0.03           | 3             | 0.1     | Normal     | 89Y (KED)   |
| 88Sr (KED)  | KED  | 0.03           | 3             | 0.1     | Normal     | 89Y (KED)   |
| 89Y (KED)   | KED  | 0.03           | 3             | 0.1     | Normal     |             |
| 107Ag (KED) | KED  | 0.03           | 3             | 0.1     | Normal     | 115In (KED) |
| 114Cd (KED) | KED  | 0.03           | 3             | 0.1     | Normal     | 115In (KED) |
| 115In (KED) | KED  | 0.03           | 3             | 0.1     | Normal     |             |
| 133Cs (KED) | KED  | 0.03           | 3             | 0.1     | Normal     | 115In (KED) |
| 138Ba (KED) | KED  | 0.03           | 3             | 0.1     | Normal     | 159Tb (KED) |
| 139La (KED) | KED  | 0.03           | 3             | 0.1     | Normal     | 159Tb (KED) |
| 140Ce (KED) | KED  | 0.03           | 3             | 0.1     | Normal     | 159Tb (KED) |
| 141Pr (KED) | KED  | 0.03           | 3             | 0.1     | Normal     | 159Tb (KED) |
| 142Nd (KED) | KED  | 0.03           | 3             | 0.1     | Normal     | 159Tb (KED) |
| 152Sm (KED) | KED  | 0.03           | 3             | 0.1     | Normal     | 159Tb (KED) |
| 153Eu (KED) | KED  | 0.03           | 3             | 0.1     | Normal     | 159Tb (KED) |
| 158Gd (KED) | KED  | 0.03           | 3             | 0.1     | Normal     | 159Tb (KED) |
| 159Tb (KED) | KED  | 0.03           | 3             | 0.1     | Normal     |             |
| 164Dy (KED) | KED  | 0.03           | 3             | 0.1     | Normal     | 159Tb (KED) |
| 166Er (KED) | KED  | 0.03           | 3             | 0.1     | Normal     | 159Tb (KED) |
| 169Tm (KED) | KED  | 0.03           | 3             | 0.1     | Normal     | 159Tb (KED) |
| 174Yb (KED) | KED  | 0.03           | 3             | 0.1     | Normal     | 159Tb (KED) |
| 175Lu (KED) | KED  | 0.03           | 3             | 0.1     | Normal     | 159Tb (KED) |
| 205Tl (KED) | KED  | 0.03           | 3             | 0.1     | Normal     | 209Bi (KED) |
| 208Pb (KED) | KED  | 0.03           | 3             | 0.1     | Normal     | 209Bi (KED) |
| 209Bi (KED) | KED  | 0.03           | 3             | 0.1     | Normal     |             |
| 232Th (KED) | KED  | 0.03           | 3             | 0.1     | Normal     | 209Bi (KED) |
| 238U (KED)  | KED  | 0.03           | 3             | 0.1     | Normal     | 209Bi (KED) |

| Isotope     | Mode | Dwell time (s) | # of Channels | Spacing | Resolution |
|-------------|------|----------------|---------------|---------|------------|
| 6Li (KED)   | KED  | 0.03           | 3             | 0.1     | Normal     |
| 45Sc (KED)  | KED  | 0.03           | 3             | 0.1     | Normal     |
| 89Y (KED)   | KED  | 0.03           | 3             | 0.1     | Normal     |
| 115In (KED) | KED  | 0.03           | 3             | 0.1     | Normal     |
| 159Tb (KED) | KED  | 0.03           | 3             | 0.1     | Normal     |
| 209Bi (KED) | KED  | 0.03           | 3             | 0.1     | Normal     |

| No. of sweeps | Time per sweep[s] | Time per main run[s] |
|---------------|-------------------|----------------------|
| 10            | 3.87              | 38.7                 |

## Calibration Curves:

9Be (KED)

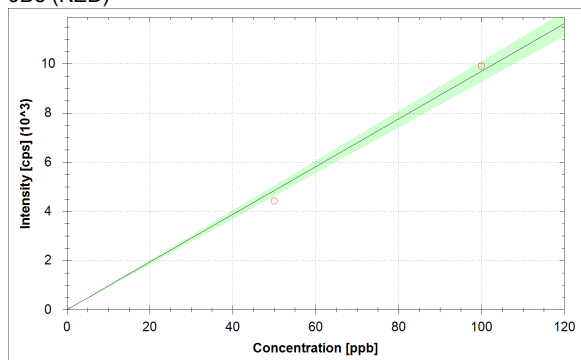

$$f(x) = 96.9239 \cdot x$$

$$R^2 = 0.9965$$

$$\text{BEC} = 0.000 \text{ ppb}$$

$$\text{LoD} = \text{N/A}$$

11B (KED)

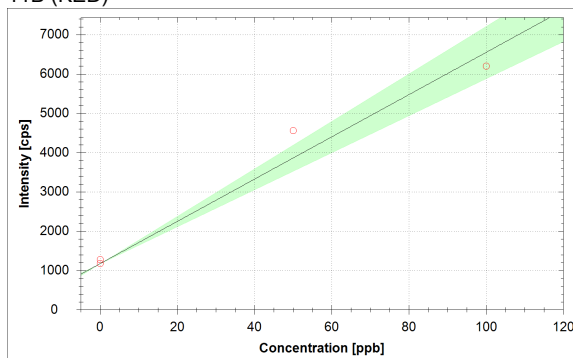

$$f(x) = 53.7544 \cdot x + 1174.1603$$

$$R^2 = 0.9667$$

$$\text{BEC} = 21.843 \text{ ppb}$$

$$\text{LoD} = \text{N/A}$$

24Mg (KED)

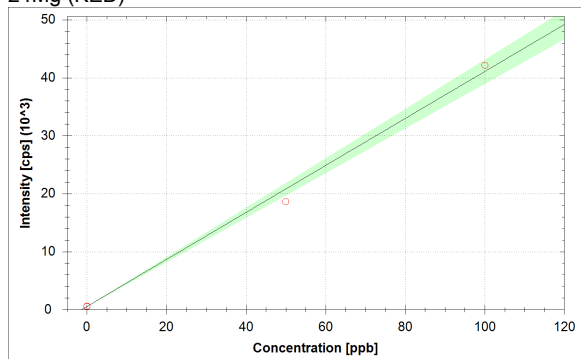

$$f(x) = 405.4058 \cdot x + 531.9246$$

$$R^2 = 0.9950$$

$$\text{BEC} = 1.312 \text{ ppb}$$

$$\text{LoD} = \text{N/A}$$

27Al (KED)

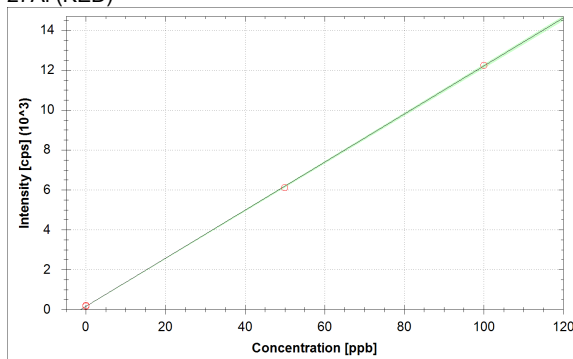

$$f(x) = 120.4281 \cdot x + 159.9485$$

$$R^2 = 0.9999$$

$$\text{BEC} = 1.328 \text{ ppb}$$

$$\text{LoD} = \text{N/A}$$

51V (KED)

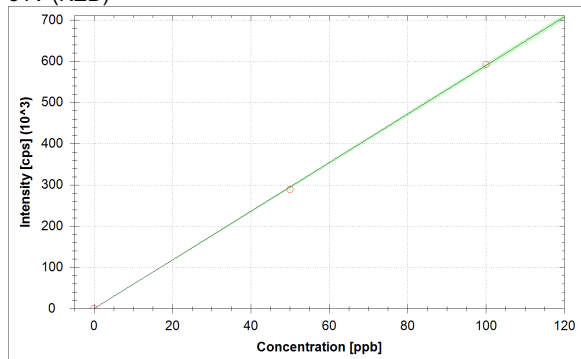

$$f(x) = 5895.7314 \cdot x + 6.3979$$

$$R^2 = 0.9998$$

$$\text{BEC} = 0.001 \text{ ppb}$$

$$\text{LoD} = \text{N/A}$$

52Cr (KED)

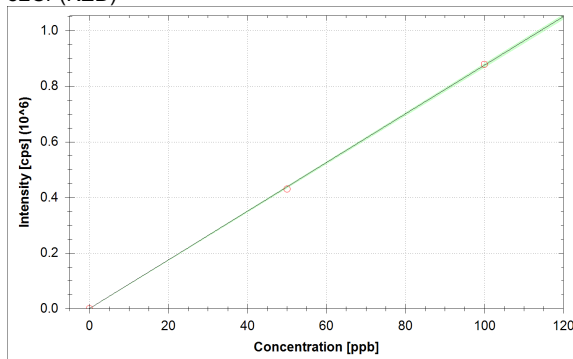

$$f(x) = 8748.8222 \cdot x + 207.9335$$

$$R^2 = 0.9999$$

$$\text{BEC} = 0.024 \text{ ppb}$$

$$\text{LoD} = \text{N/A}$$

55Mn (KED)

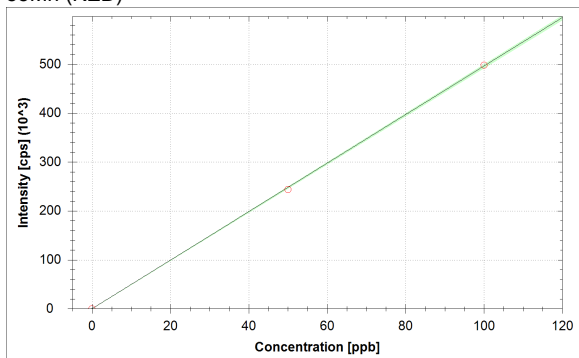

$$f(x) = 4961.0313 \cdot x + 118.3616$$

$$R^2 = 0.9999$$

$$\text{BEC} = 0.024 \text{ ppb}$$

$$\text{LoD} = \text{N/A}$$

56Fe (KED)

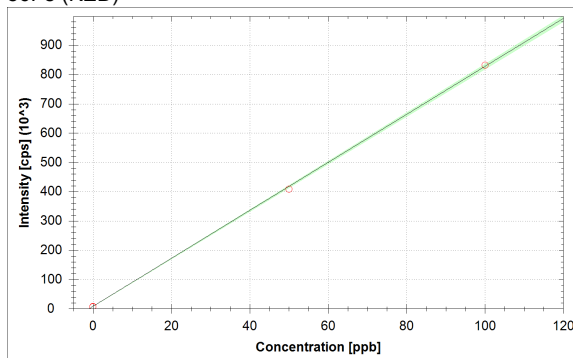

$$f(x) = 8195.1687 \cdot x + 8155.9385$$

$$R^2 = 0.9998$$

$$\text{BEC} = 0.995 \text{ ppb}$$

$$\text{LoD} = \text{N/A}$$

58Ni (KED)

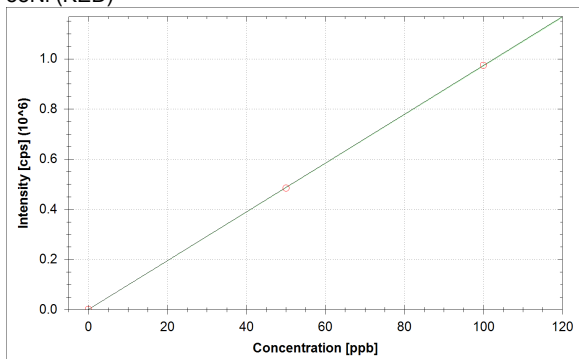

$$f(x) = 9722.7508 \cdot x + 537.4358$$

$$R^2 = 1.0000$$

$$\text{BEC} = 0.055 \text{ ppb}$$

$$\text{LoD} = \text{N/A}$$

59Co (KED)

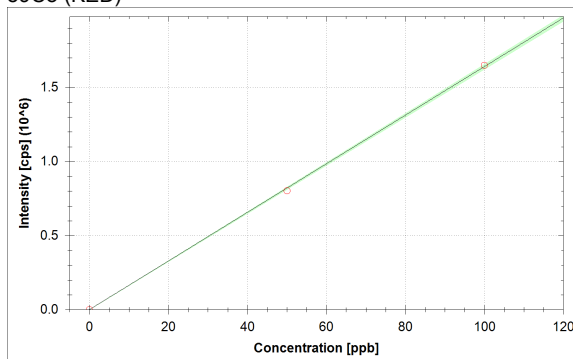

$$f(x) = 16409.1489 \cdot x + 41.5864$$

$$R^2 = 0.9998$$

$$\text{BEC} = 0.003 \text{ ppb}$$

$$\text{LoD} = \text{N/A}$$

63Cu (KED)

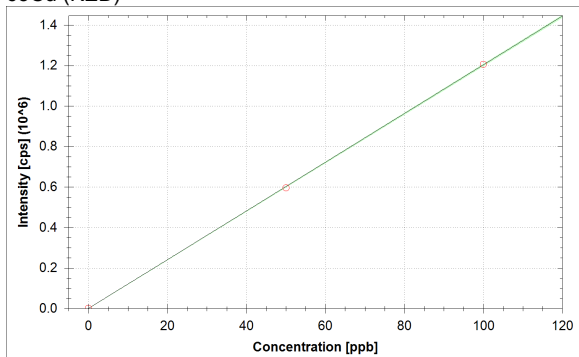

$$f(x) = 12027.1916 \cdot x + 820.1952$$

$$R^2 = 1.0000$$

$$\text{BEC} = 0.068 \text{ ppb}$$

$$\text{LoD} = \text{N/A}$$

64Zn (KED)

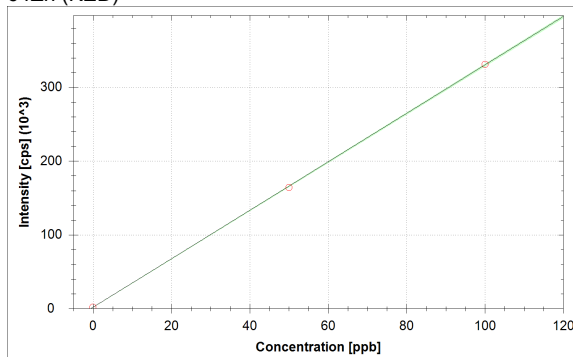

$$f(x) = 3286.3157 \cdot x + 1789.8791$$

$$R^2 = 0.9999$$

$$\text{BEC} = 0.545 \text{ ppb}$$

$$\text{LoD} = \text{N/A}$$

69Ga (KED)

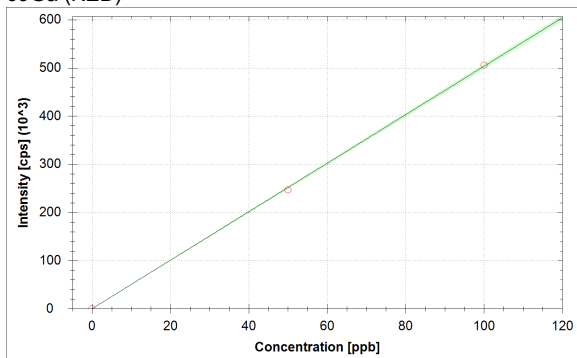

$$f(x) = 5031.9328x + 69.9370$$

$$R^2 = 0.9998$$

$$\text{BEC} = 0.014 \text{ ppb}$$

$$\text{LoD} = \text{N/A}$$

75As (KED)

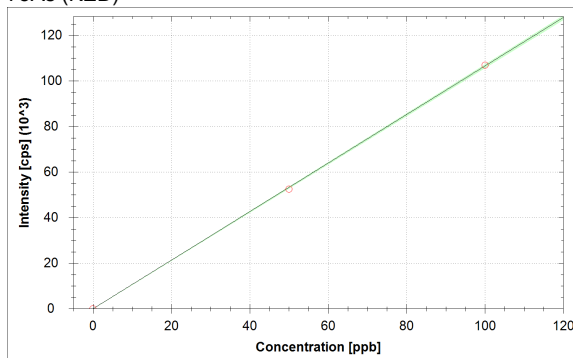

$$f(x) = 1065.4406x + 12.7158$$

$$R^2 = 0.9999$$

$$\text{BEC} = 0.012 \text{ ppb}$$

$$\text{LoD} = \text{N/A}$$

80Se (KED)

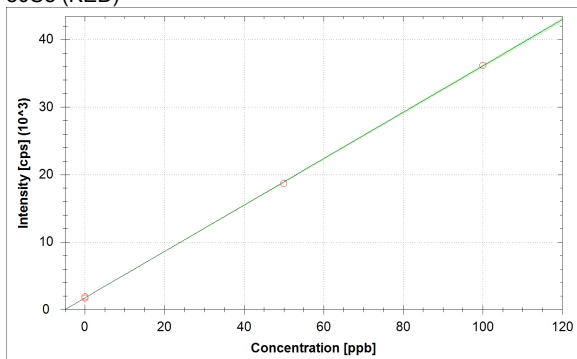

$$f(x) = 343.5572x + 1726.2902$$

$$R^2 = 0.9999$$

$$\text{BEC} = 5.025 \text{ ppb}$$

$$\text{LoD} = \text{N/A}$$

85Rb (KED)

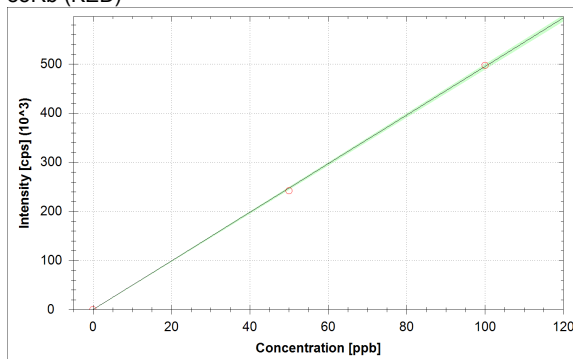

$$f(x) = 4948.4381x + 22.2526$$

$$R^2 = 0.9998$$

$$\text{BEC} = 0.004 \text{ ppb}$$

$$\text{LoD} = \text{N/A}$$

88Sr (KED)

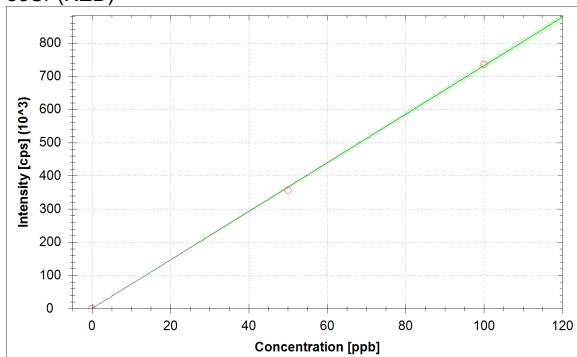

$$f(x) = 7312.8956x + 289.2868$$

$$R^2 = 0.9997$$

$$\text{BEC} = 0.040 \text{ ppb}$$

$$\text{LoD} = \text{N/A}$$

107Ag (KED)

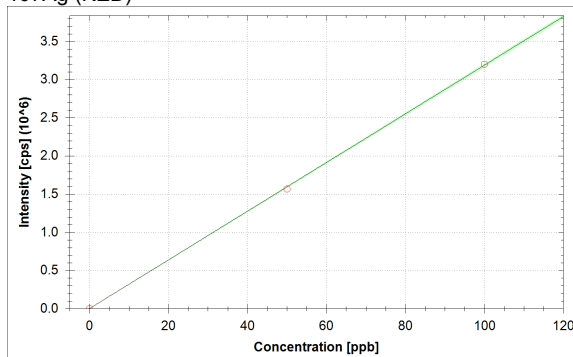

$$f(x) = 31880.4814x + 16.3320$$

$$R^2 = 0.9999$$

$$\text{BEC} = 0.001 \text{ ppb}$$

$$\text{LoD} = \text{N/A}$$

114Cd (KED)

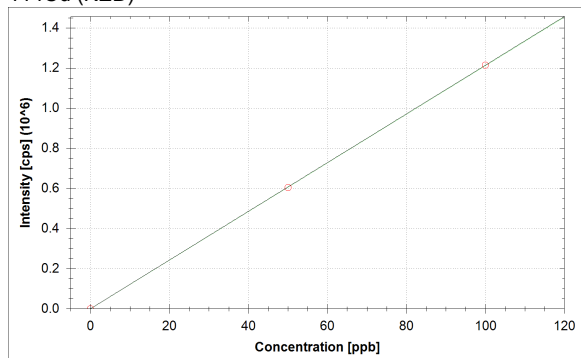

$$f(x) = 12134.2010 \cdot x + 35.9303$$

$$R^2 = 1.0000$$

$$\text{BEC} = 0.003 \text{ ppb}$$

$$\text{LoD} = \text{N/A}$$

133Cs (KED)

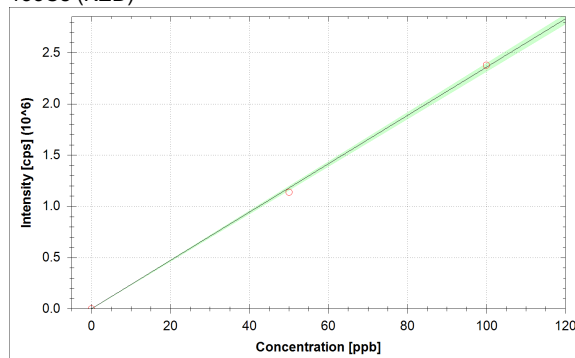

$$f(x) = 23576.0906 \cdot x + 42.4631$$

$$R^2 = 0.9994$$

$$\text{BEC} = 0.002 \text{ ppb}$$

$$\text{LoD} = \text{N/A}$$

138Ba (KED)

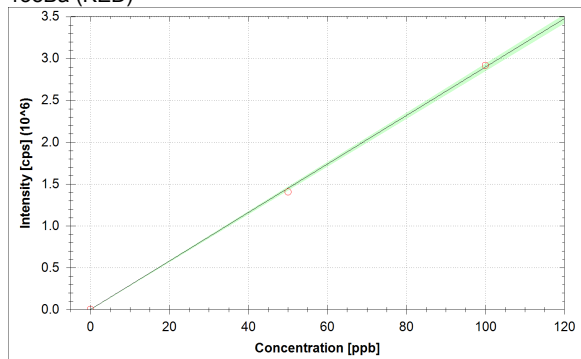

$$f(x) = 28957.7610 \cdot x + 1353.4668$$

$$R^2 = 0.9996$$

$$\text{BEC} = 0.047 \text{ ppb}$$

$$\text{LoD} = \text{N/A}$$

139La (KED)

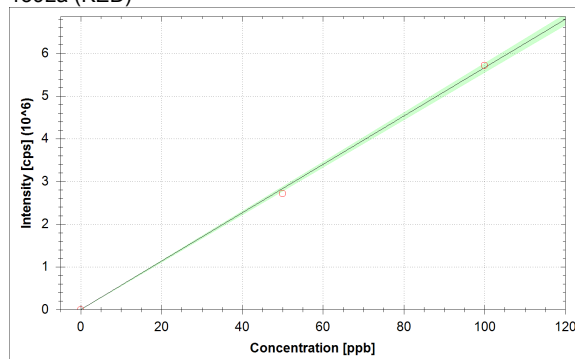

$$f(x) = 56624.0910 \cdot x + 203.1743$$

$$R^2 = 0.9993$$

$$\text{BEC} = 0.004 \text{ ppb}$$

$$\text{LoD} = \text{N/A}$$

140Ce (KED)

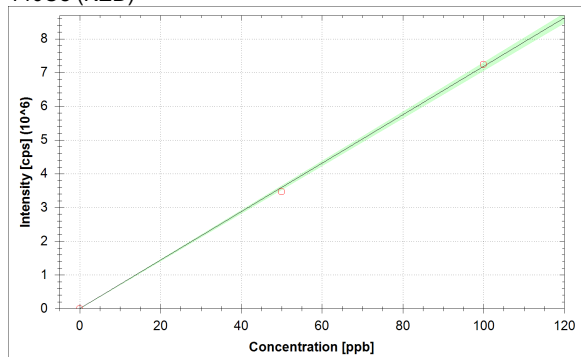

$$f(x) = 71819.3385 \cdot x + 629.1968$$

$$R^2 = 0.9994$$

$$\text{BEC} = 0.009 \text{ ppb}$$

$$\text{LoD} = \text{N/A}$$

141Pr (KED)

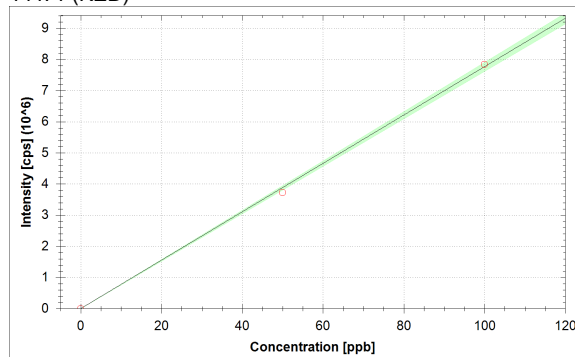

$$f(x) = 77660.1370 \cdot x + 68.8168$$

$$R^2 = 0.9993$$

$$\text{BEC} = 0.001 \text{ ppb}$$

$$\text{LoD} = \text{N/A}$$

142Nd (KED)

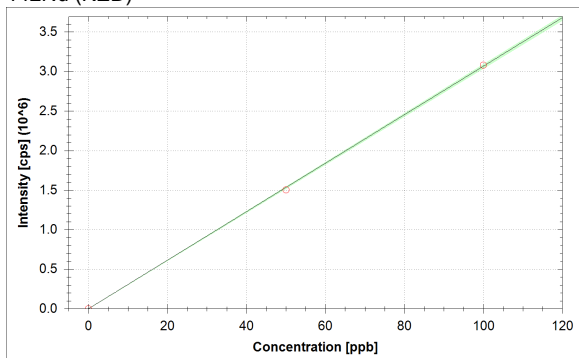

$$f(x) = 30666.1152 \cdot x + 140.9109$$

$$R^2 = 0.9998$$

$$\text{BEC} = 0.005 \text{ ppb}$$

$$\text{LoD} = \text{N/A}$$

152Sm (KED)

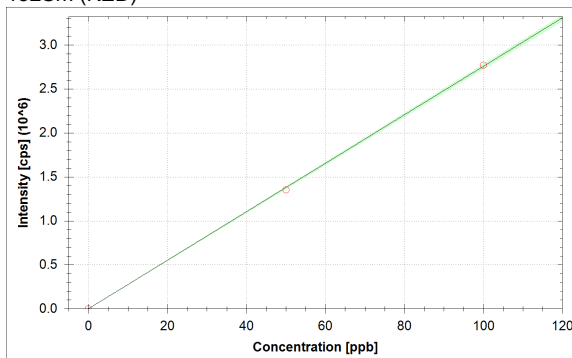

$$f(x) = 27564.6529 \cdot x + 26.2159$$

$$R^2 = 0.9998$$

$$\text{BEC} = 0.001 \text{ ppb}$$

$$\text{LoD} = \text{N/A}$$

153Eu (KED)

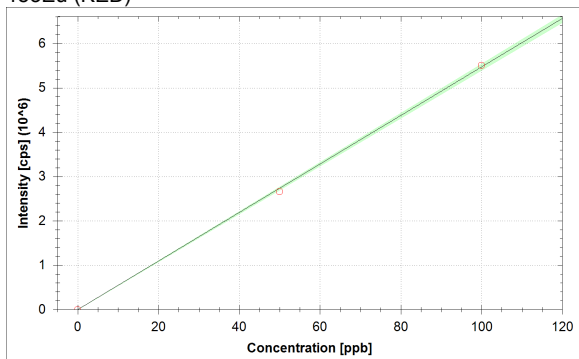

$$f(x) = 54695.6166 \cdot x + 29.4928$$

$$R^2 = 0.9996$$

$$\text{BEC} = 0.001 \text{ ppb}$$

$$\text{LoD} = \text{N/A}$$

158Gd (KED)

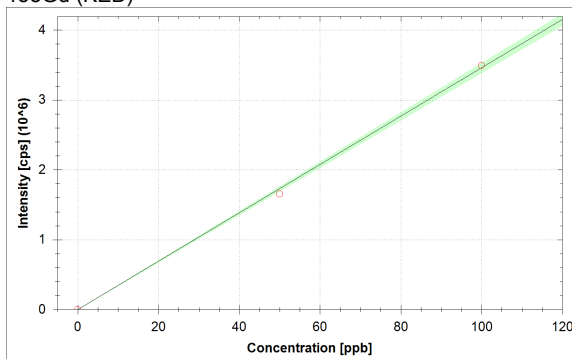

$$f(x) = 34593.8301 \cdot x + 36.0468$$

$$R^2 = 0.9992$$

$$\text{BEC} = 0.001 \text{ ppb}$$

$$\text{LoD} = \text{N/A}$$

164Dy (KED)

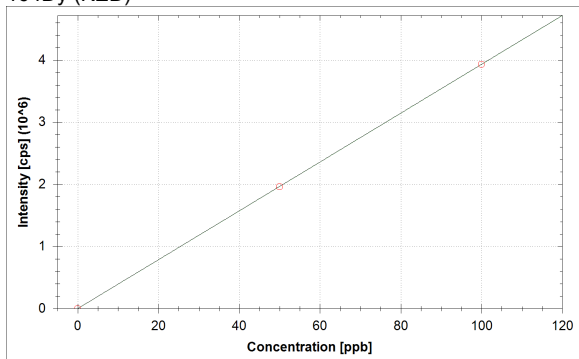

$$f(x) = 39320.9368 \cdot x + 19.6619$$

$$R^2 = 1.0000$$

$$\text{BEC} = 0.001 \text{ ppb}$$

$$\text{LoD} = \text{N/A}$$

166Er (KED)

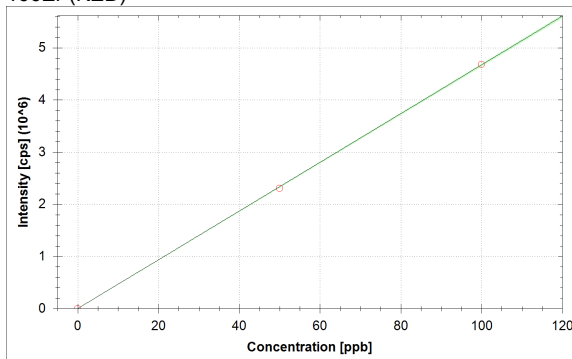

$$f(x) = 46710.2638 \cdot x + 439.1230$$

$$R^2 = 0.9999$$

$$\text{BEC} = 0.009 \text{ ppb}$$

$$\text{LoD} = \text{N/A}$$

# Comprehensive

10/9/2021 4:31:46 PM

**<sup>169</sup>Tm (KED)**

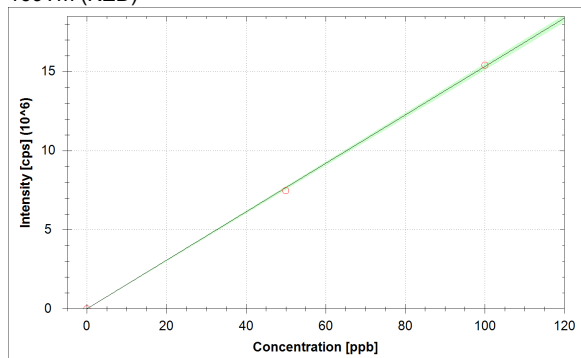

$$f(x) = 153091.6710 \cdot x + 68.8167$$

$$R^2 = 0.9997$$

$$\text{BEC} = 0.000 \text{ ppb}$$

$$\text{LoD} = \text{N/A}$$

**<sup>174</sup>Yb (KED)**

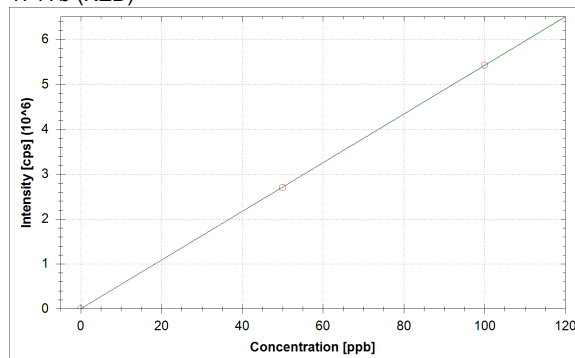

$$f(x) = 54226.0271 \cdot x + 39.3238$$

$$R^2 = 1.0000$$

$$\text{BEC} = 0.001 \text{ ppb}$$

$$\text{LoD} = \text{N/A}$$

**<sup>175</sup>Lu (KED)**

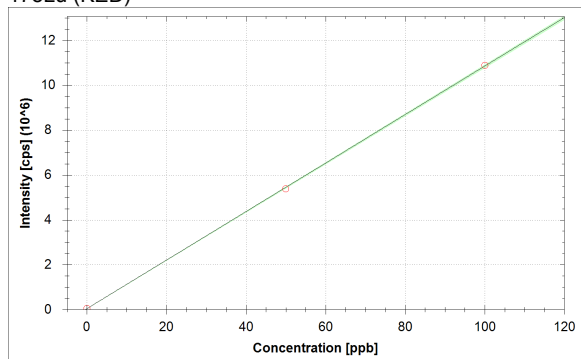

$$f(x) = 108120.7300 \cdot x + 42710.9742$$

$$R^2 = 0.9999$$

$$\text{BEC} = 0.395 \text{ ppb}$$

$$\text{LoD} = \text{N/A}$$

**<sup>205</sup>Tl (KED)**

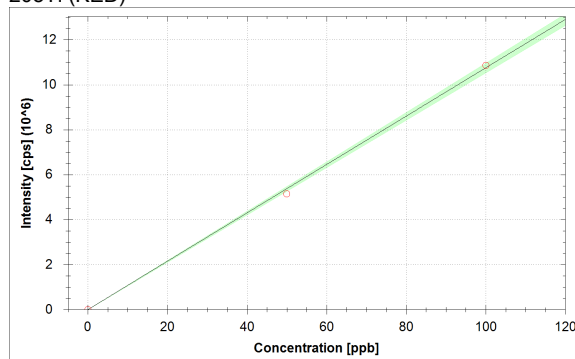

$$f(x) = 107493.6297 \cdot x + 40.3595$$

$$R^2 = 0.9992$$

$$\text{BEC} = 0.000 \text{ ppb}$$

$$\text{LoD} = \text{N/A}$$

**<sup>208</sup>Pb (KED)**

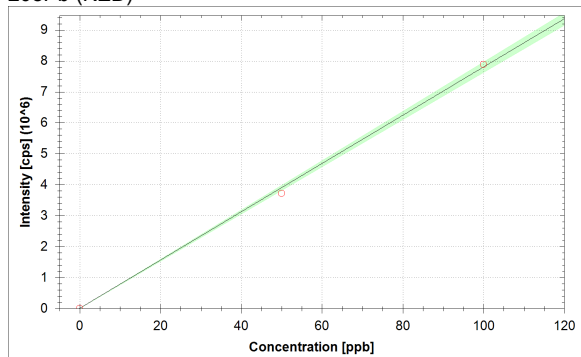

$$f(x) = 77922.1505 \cdot x + 8542.2836$$

$$R^2 = 0.9990$$

$$\text{BEC} = 0.110 \text{ ppb}$$

$$\text{LoD} = \text{N/A}$$

**<sup>232</sup>Th (KED)**

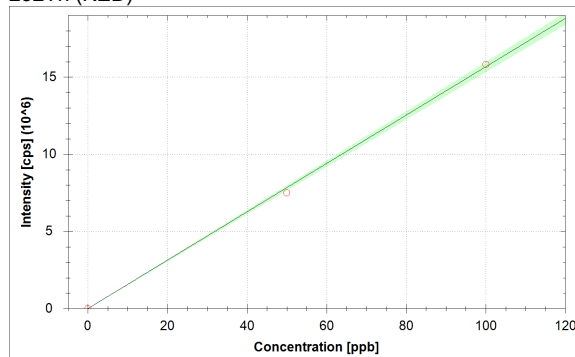

$$f(x) = 156668.1892 \cdot x + 349.7874$$

$$R^2 = 0.9992$$

$$\text{BEC} = 0.002 \text{ ppb}$$

$$\text{LoD} = \text{N/A}$$

238U (KED)

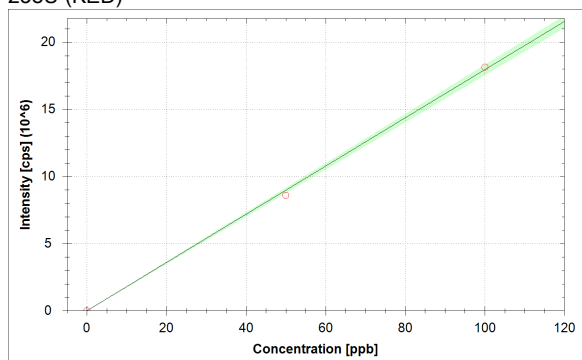

$$f(x) = 179503.9878 \cdot x + 208.5256$$

$$R^2 = 0.9992$$

$$\text{BEC} = 0.001 \text{ ppb}$$

$$\text{LoD} = \text{N/A}$$

# Comprehensive

10/9/2021 4:31:46 PM

## Standards:

Analysis Index: 3  
Analysis Name: 0+20  
Analysis Type: STD  
Analysis Started at: 10/9/2021 3:17:48 PM  
Standard (Stock): std0  
Standard DF: 1

| Category    | Concentration average | Concentration RSD | Standard Concentration |
|-------------|-----------------------|-------------------|------------------------|
| 6Li (KED)   | 102.774 %             |                   |                        |
| 9Be (KED)   | 0.000 ppb             |                   | 0.000 ppb              |
| 11B (KED)   | 0.000 ppb             |                   | 0.000 ppb              |
| 24Mg (KED)  | 0.000 ppb             |                   | 0.000 ppb              |
| 27Al (KED)  | 0.000 ppb             |                   | 0.000 ppb              |
| 45Sc (KED)  | 104.201 %             |                   |                        |
| 51V (KED)   | 0.000 ppb             |                   | 0.000 ppb              |
| 52Cr (KED)  | 0.000 ppb             |                   | 0.000 ppb              |
| 55Mn (KED)  | 0.000 ppb             |                   | 0.000 ppb              |
| 56Fe (KED)  | 0.000 ppb             |                   | 0.000 ppb              |
| 58Ni (KED)  | 0.000 ppb             |                   | 0.000 ppb              |
| 59Co (KED)  | 0.000 ppb             |                   | 0.000 ppb              |
| 63Cu (KED)  | 0.000 ppb             |                   | 0.000 ppb              |
| 64Zn (KED)  | 0.000 ppb             |                   | 0.000 ppb              |
| 69Ga (KED)  | 0.000 ppb             |                   | 0.000 ppb              |
| 75As (KED)  | 0.000 ppb             |                   | 0.000 ppb              |
| 80Se (KED)  | 0.000 ppb             |                   | 0.000 ppb              |
| 85Rb (KED)  | 0.000 ppb             |                   | 0.000 ppb              |
| 88Sr (KED)  | 0.000 ppb             |                   | 0.000 ppb              |
| 89Y (KED)   | 104.857 %             |                   |                        |
| 107Ag (KED) | 0.000 ppb             |                   | 0.000 ppb              |
| 114Cd (KED) | 0.000 ppb             |                   | 0.000 ppb              |
| 115In (KED) | 102.050 %             |                   |                        |
| 133Cs (KED) | 0.000 ppb             |                   | 0.000 ppb              |
| 138Ba (KED) | 0.000 ppb             |                   | 0.000 ppb              |
| 139La (KED) | 0.000 ppb             |                   | 0.000 ppb              |
| 140Ce (KED) | 0.000 ppb             |                   | 0.000 ppb              |
| 141Pr (KED) | 0.000 ppb             |                   | 0.000 ppb              |
| 142Nd (KED) | 0.000 ppb             |                   | 0.000 ppb              |
| 152Sm (KED) | 0.000 ppb             |                   | 0.000 ppb              |
| 153Eu (KED) | 0.000 ppb             |                   | 0.000 ppb              |
| 158Gd (KED) | 0.000 ppb             |                   | 0.000 ppb              |
| 159Tb (KED) | 101.720 %             |                   |                        |
| 164Dy (KED) | 0.000 ppb             |                   | 0.000 ppb              |
| 166Er (KED) | 0.000 ppb             |                   | 0.000 ppb              |
| 169Tm (KED) | 0.000 ppb             |                   | 0.000 ppb              |
| 174Yb (KED) | 0.000 ppb             |                   | 0.000 ppb              |
| 175Lu (KED) | 0.000 ppb             |                   | 0.000 ppb              |
| 205Tl (KED) | 0.000 ppb             |                   | 0.000 ppb              |
| 208Pb (KED) | 0.000 ppb             |                   | 0.000 ppb              |
| 209Bi (KED) | 99.109 %              |                   |                        |
| 232Th (KED) | 0.000 ppb             |                   | 0.000 ppb              |
| 238U (KED)  | 0.000 ppb             |                   | 0.000 ppb              |

# Comprehensive

10/9/2021 4:31:46 PM

## Standards:

Analysis Index: 4  
Analysis Name: 50+20  
Analysis Type: STD  
Analysis Started at: 10/9/2021 3:20:17 PM  
Standard (Stock): std1  
Standard DF: 1

| Category    | Concentration average | Concentration RSD | Standard Concentration |
|-------------|-----------------------|-------------------|------------------------|
| 6Li (KED)   | 103.082 %             |                   |                        |
| 9Be (KED)   | 45.582 ppb            |                   | 50.000 ppb             |
| 11B (KED)   | 62.993 ppb            |                   | 50.000 ppb             |
| 24Mg (KED)  | 44.659 ppb            |                   | 50.000 ppb             |
| 27Al (KED)  | 49.318 ppb            |                   | 50.000 ppb             |
| 45Sc (KED)  | 109.224 %             |                   |                        |
| 51V (KED)   | 48.966 ppb            |                   | 50.000 ppb             |
| 52Cr (KED)  | 49.135 ppb            |                   | 50.000 ppb             |
| 55Mn (KED)  | 49.171 ppb            |                   | 50.000 ppb             |
| 56Fe (KED)  | 48.898 ppb            |                   | 50.000 ppb             |
| 58Ni (KED)  | 49.738 ppb            |                   | 50.000 ppb             |
| 59Co (KED)  | 48.893 ppb            |                   | 50.000 ppb             |
| 63Cu (KED)  | 49.526 ppb            |                   | 50.000 ppb             |
| 64Zn (KED)  | 49.452 ppb            |                   | 50.000 ppb             |
| 69Ga (KED)  | 49.000 ppb            |                   | 50.000 ppb             |
| 75As (KED)  | 49.235 ppb            |                   | 50.000 ppb             |
| 80Se (KED)  | 49.390 ppb            |                   | 50.000 ppb             |
| 85Rb (KED)  | 48.920 ppb            |                   | 50.000 ppb             |
| 88Sr (KED)  | 48.754 ppb            |                   | 50.000 ppb             |
| 89Y (KED)   | 107.211 %             |                   |                        |
| 107Ag (KED) | 49.197 ppb            |                   | 50.000 ppb             |
| 114Cd (KED) | 49.821 ppb            |                   | 50.000 ppb             |
| 115In (KED) | 105.439 %             |                   |                        |
| 133Cs (KED) | 48.205 ppb            |                   | 50.000 ppb             |
| 138Ba (KED) | 48.449 ppb            |                   | 50.000 ppb             |
| 139La (KED) | 47.987 ppb            |                   | 50.000 ppb             |
| 140Ce (KED) | 48.218 ppb            |                   | 50.000 ppb             |
| 141Pr (KED) | 48.004 ppb            |                   | 50.000 ppb             |
| 142Nd (KED) | 49.076 ppb            |                   | 50.000 ppb             |
| 152Sm (KED) | 48.959 ppb            |                   | 50.000 ppb             |
| 153Eu (KED) | 48.571 ppb            |                   | 50.000 ppb             |
| 158Gd (KED) | 47.879 ppb            |                   | 50.000 ppb             |
| 159Tb (KED) | 107.396 %             |                   |                        |
| 164Dy (KED) | 49.966 ppb            |                   | 50.000 ppb             |
| 166Er (KED) | 49.454 ppb            |                   | 50.000 ppb             |
| 169Tm (KED) | 48.730 ppb            |                   | 50.000 ppb             |
| 174Yb (KED) | 49.769 ppb            |                   | 50.000 ppb             |
| 175Lu (KED) | 49.308 ppb            |                   | 50.000 ppb             |
| 205Tl (KED) | 47.859 ppb            |                   | 50.000 ppb             |
| 208Pb (KED) | 47.695 ppb            |                   | 50.000 ppb             |
| 209Bi (KED) | 106.309 %             |                   |                        |
| 232Th (KED) | 47.901 ppb            |                   | 50.000 ppb             |
| 238U (KED)  | 47.825 ppb            |                   | 50.000 ppb             |

# Comprehensive

10/9/2021 4:31:46 PM

## Standards:

Analysis Index: 5  
Analysis Name: 100+20  
Analysis Type: STD  
Analysis Started at: 10/9/2021 3:23:07 PM  
Standard (Stock): std2  
Standard DF: 1

| Category    | Concentration average | Concentration RSD | Standard Concentration |
|-------------|-----------------------|-------------------|------------------------|
| 6Li (KED)   | 98.459 %              |                   |                        |
| 9Be (KED)   | 102.209 ppb           |                   | 100.000 ppb            |
| 11B (KED)   | 93.503 ppb            |                   | 100.000 ppb            |
| 24Mg (KED)  | 102.670 ppb           |                   | 100.000 ppb            |
| 27Al (KED)  | 100.341 ppb           |                   | 100.000 ppb            |
| 45Sc (KED)  | 112.854 %             |                   |                        |
| 51V (KED)   | 100.517 ppb           |                   | 100.000 ppb            |
| 52Cr (KED)  | 100.433 ppb           |                   | 100.000 ppb            |
| 55Mn (KED)  | 100.415 ppb           |                   | 100.000 ppb            |
| 56Fe (KED)  | 100.551 ppb           |                   | 100.000 ppb            |
| 58Ni (KED)  | 100.131 ppb           |                   | 100.000 ppb            |
| 59Co (KED)  | 100.554 ppb           |                   | 100.000 ppb            |
| 63Cu (KED)  | 100.237 ppb           |                   | 100.000 ppb            |
| 64Zn (KED)  | 100.274 ppb           |                   | 100.000 ppb            |
| 69Ga (KED)  | 100.500 ppb           |                   | 100.000 ppb            |
| 75As (KED)  | 100.383 ppb           |                   | 100.000 ppb            |
| 80Se (KED)  | 100.305 ppb           |                   | 100.000 ppb            |
| 85Rb (KED)  | 100.540 ppb           |                   | 100.000 ppb            |
| 88Sr (KED)  | 100.623 ppb           |                   | 100.000 ppb            |
| 89Y (KED)   | 110.863 %             |                   |                        |
| 107Ag (KED) | 100.402 ppb           |                   | 100.000 ppb            |
| 114Cd (KED) | 100.090 ppb           |                   | 100.000 ppb            |
| 115In (KED) | 108.963 %             |                   |                        |
| 133Cs (KED) | 100.898 ppb           |                   | 100.000 ppb            |
| 138Ba (KED) | 100.776 ppb           |                   | 100.000 ppb            |
| 139La (KED) | 101.007 ppb           |                   | 100.000 ppb            |
| 140Ce (KED) | 100.891 ppb           |                   | 100.000 ppb            |
| 141Pr (KED) | 100.998 ppb           |                   | 100.000 ppb            |
| 142Nd (KED) | 100.462 ppb           |                   | 100.000 ppb            |
| 152Sm (KED) | 100.521 ppb           |                   | 100.000 ppb            |
| 153Eu (KED) | 100.715 ppb           |                   | 100.000 ppb            |
| 158Gd (KED) | 101.060 ppb           |                   | 100.000 ppb            |
| 159Tb (KED) | 111.219 %             |                   |                        |
| 164Dy (KED) | 100.017 ppb           |                   | 100.000 ppb            |
| 166Er (KED) | 100.273 ppb           |                   | 100.000 ppb            |
| 169Tm (KED) | 100.635 ppb           |                   | 100.000 ppb            |
| 174Yb (KED) | 100.116 ppb           |                   | 100.000 ppb            |
| 175Lu (KED) | 100.346 ppb           |                   | 100.000 ppb            |
| 205Tl (KED) | 101.071 ppb           |                   | 100.000 ppb            |
| 208Pb (KED) | 101.152 ppb           |                   | 100.000 ppb            |
| 209Bi (KED) | 107.531 %             |                   |                        |
| 232Th (KED) | 101.050 ppb           |                   | 100.000 ppb            |
| 238U (KED)  | 101.088 ppb           |                   | 100.000 ppb            |

# Comprehensive

10/9/2021 4:31:46 PM

## Sample List Summary:

Instrument ID: iCAP Q

| Index: | Label:  | Main<br>Runs: | Survey<br>Runs: | Start Time:          | User name:                    |
|--------|---------|---------------|-----------------|----------------------|-------------------------------|
| 1      | water   | 1             | 0               | 10/9/2021 3:14:00 PM | WINDOWS-UPCI4ER\Administrator |
| 2      | blk     | 1             | 0               | 10/9/2021 3:15:41 PM | WINDOWS-UPCI4ER\Administrator |
| 3      | 0+20    | 1             | 0               | 10/9/2021 3:17:48 PM | WINDOWS-UPCI4ER\Administrator |
| 4      | 50+20   | 1             | 0               | 10/9/2021 3:20:17 PM | WINDOWS-UPCI4ER\Administrator |
| 5      | 100+20  | 1             | 0               | 10/9/2021 3:23:07 PM | WINDOWS-UPCI4ER\Administrator |
| 6      | 11ti    | 1             | 0               | 10/9/2021 3:25:42 PM | WINDOWS-UPCI4ER\Administrator |
| 7      | 2ti     | 1             | 0               | 10/9/2021 3:28:26 PM | WINDOWS-UPCI4ER\Administrator |
| 8      | w19ti   | 1             | 0               | 10/9/2021 3:31:18 PM | WINDOWS-UPCI4ER\Administrator |
| 9      | 7ti     | 1             | 0               | 10/9/2021 3:34:03 PM | WINDOWS-UPCI4ER\Administrator |
| 10     | 12ti    | 1             | 0               | 10/9/2021 3:36:38 PM | WINDOWS-UPCI4ER\Administrator |
| 11     | 20ti    | 1             | 0               | 10/9/2021 3:39:27 PM | WINDOWS-UPCI4ER\Administrator |
| 12     | 4-2ti   | 1             | 0               | 10/9/2021 3:42:00 PM | WINDOWS-UPCI4ER\Administrator |
| 13     | 00077ti | 1             | 0               | 10/9/2021 3:44:59 PM | WINDOWS-UPCI4ER\Administrator |
| 14     | 0299ti  | 1             | 0               | 10/9/2021 3:48:29 PM | WINDOWS-UPCI4ER\Administrator |
| 15     | 5ti     | 1             | 0               | 10/9/2021 3:51:35 PM | WINDOWS-UPCI4ER\Administrator |
| 16     | 23ti    | 1             | 0               | 10/9/2021 3:54:38 PM | WINDOWS-UPCI4ER\Administrator |
| 17     | 00061ti | 1             | 0               | 10/9/2021 3:57:44 PM | WINDOWS-UPCI4ER\Administrator |
| 18     | 00099ti | 1             | 0               | 10/9/2021 4:00:25 PM | WINDOWS-UPCI4ER\Administrator |
| 19     | 00074ti | 1             | 0               | 10/9/2021 4:03:10 PM | WINDOWS-UPCI4ER\Administrator |
| 20     | 00078ti | 1             | 0               | 10/9/2021 4:06:06 PM | WINDOWS-UPCI4ER\Administrator |
| 21     | 25ti    | 1             | 0               | 10/9/2021 4:08:57 PM | WINDOWS-UPCI4ER\Administrator |
| 22     | 22-12ti | 1             | 0               | 10/9/2021 4:11:30 PM | WINDOWS-UPCI4ER\Administrator |
| 23     | 7ti     | 1             | 0               | 10/9/2021 4:14:06 PM | WINDOWS-UPCI4ER\Administrator |
| 24     | 6ti     | 1             | 0               | 10/9/2021 4:16:35 PM | WINDOWS-UPCI4ER\Administrator |
| 25     | 19ti    | 1             | 0               | 10/9/2021 4:19:06 PM | WINDOWS-UPCI4ER\Administrator |
| 26     | 00090ti | 1             | 0               | 10/9/2021 4:21:40 PM | WINDOWS-UPCI4ER\Administrator |
| 27     | 00070ti | 1             | 0               | 10/9/2021 4:24:01 PM | WINDOWS-UPCI4ER\Administrator |
| 28     | 00098ti | 1             | 0               | 10/9/2021 4:26:30 PM | WINDOWS-UPCI4ER\Administrator |
| 29     | 5ti     | 1             | 0               | 10/9/2021 4:28:53 PM | WINDOWS-UPCI4ER\Administrator |

# Comprehensive

10/9/2021 4:31:46 PM

## Sample Summary

Instrument ID: iCAP Q

Analysis index: 1

Analysis name: water

Analysis started at: 10/9/2021 3:14:00 PM

User name: WINDOWS-UPCI4ER\Administrator

| Category    | Concentration average | Concentration RSD |
|-------------|-----------------------|-------------------|
| 6Li (KED)   | 0.154 %               |                   |
| 9Be (KED)   | 0.000 ppb             |                   |
| 11B (KED)   | 501.388 ppb           |                   |
| 24Mg (KED)  | 196.146 ppb           |                   |
| 27Al (KED)  | 31.624 ppb            |                   |
| 45Sc (KED)  | 0.168 %               |                   |
| 51V (KED)   | -0.001 ppb            |                   |
| 52Cr (KED)  | 96.191 ppb            |                   |
| 55Mn (KED)  | 9.175 ppb             |                   |
| 56Fe (KED)  | 23.943 ppb            |                   |
| 58Ni (KED)  | 12.802 ppb            |                   |
| 59Co (KED)  | 0.239 ppb             |                   |
| 63Cu (KED)  | Infinity ppb          |                   |
| 64Zn (KED)  | Infinity ppb          |                   |
| 69Ga (KED)  | Infinity ppb          |                   |
| 75As (KED)  | Infinity ppb          |                   |
| 80Se (KED)  | Infinity ppb          |                   |
| 85Rb (KED)  | Infinity ppb          |                   |
| 88Sr (KED)  | Infinity ppb          |                   |
| 89Y (KED)   | 0.000 %               |                   |
| 107Ag (KED) | 141.923 ppb           |                   |
| 114Cd (KED) | 62.144 ppb            |                   |
| 115In (KED) | 0.000 %               |                   |
| 133Cs (KED) | 31.984 ppb            |                   |
| 138Ba (KED) | Infinity ppb          |                   |
| 139La (KED) | Infinity ppb          |                   |
| 140Ce (KED) | Infinity ppb          |                   |
| 141Pr (KED) | Infinity ppb          |                   |
| 158Gd (KED) | Infinity ppb          |                   |
| 159Tb (KED) | 0.000 %               |                   |
| 205Tl (KED) | 55.614 ppb            |                   |
| 208Pb (KED) | 593.203 ppb           |                   |
| 209Bi (KED) | 0.001 %               |                   |
| 232Th (KED) | -0.002 ppb            |                   |
| 238U (KED)  | 11.100 ppb            |                   |

| Category   | Concentration average | Intensity average | Intensity RSD |
|------------|-----------------------|-------------------|---------------|
| 6Li (KED)  | 0.154 %               | 3 cps             |               |
| 9Be (KED)  | 0.000 ppb             | 0 cps             |               |
| 11B (KED)  | 501.388 ppb           | 43 cps            |               |
| 24Mg (KED) | 196.146 ppb           | 123 cps           |               |
| 27Al (KED) | 31.624 ppb            | 7 cps             |               |
| 45Sc (KED) | 0.168 %               | 77 cps            |               |
| 51V (KED)  | -0.001 ppb            | 0 cps             |               |
| 52Cr (KED) | 96.191 ppb            | 1,414 cps         |               |
| 55Mn (KED) | 9.175 ppb             | 77 cps            |               |
| 56Fe (KED) | 23.943 ppb            | 343 cps           |               |
| 58Ni (KED) | 12.802 ppb            | 210 cps           |               |
| 59Co (KED) | 0.239 ppb             | 7 cps             |               |
| 63Cu (KED) | Infinity ppb          | 223 cps           |               |

# Comprehensive

10/9/2021 4:31:46 PM

| Category    | Concentration average | Intensity average | Intensity RSD |
|-------------|-----------------------|-------------------|---------------|
| 64Zn (KED)  | Infinity ppb          | 573 cps           |               |
| 69Ga (KED)  | Infinity ppb          | 10 cps            |               |
| 75As (KED)  | Infinity ppb          | 13 cps            |               |
| 80Se (KED)  | Infinity ppb          | 1,930 cps         |               |
| 85Rb (KED)  | Infinity ppb          | 17 cps            |               |
| 88Sr (KED)  | Infinity ppb          | 70 cps            |               |
| 89Y (KED)   | 0.000 %               | 0 cps             |               |
| 107Ag (KED) | 141.923 ppb           | 20 cps            |               |
| 114Cd (KED) | 62.144 ppb            | 3 cps             |               |
| 115In (KED) | 0.000 %               | 3 cps             |               |
| 133Cs (KED) | 31.984 ppb            | 3 cps             |               |
| 138Ba (KED) | Infinity ppb          | 350 cps           |               |
| 139La (KED) | Infinity ppb          | 3 cps             |               |
| 140Ce (KED) | Infinity ppb          | 7 cps             |               |
| 141Pr (KED) | Infinity ppb          | 7 cps             |               |
| 142Nd (KED) |                       | 0 cps             |               |
| 152Sm (KED) |                       | 0 cps             |               |
| 153Eu (KED) |                       | 0 cps             |               |
| 158Gd (KED) | Infinity ppb          | 3 cps             |               |
| 159Tb (KED) | 0.000 %               | 0 cps             |               |
| 164Dy (KED) |                       | 0 cps             |               |
| 166Er (KED) |                       | 0 cps             |               |
| 169Tm (KED) |                       | 0 cps             |               |
| 174Yb (KED) |                       | 0 cps             |               |
| 175Lu (KED) |                       | 0 cps             |               |
| 205Tl (KED) | 55.614 ppb            | 50 cps            |               |
| 208Pb (KED) | 593.203 ppb           | 387 cps           |               |
| 209Bi (KED) | 0.001 %               | 23 cps            |               |
| 232Th (KED) | -0.002 ppb            | 0 cps             |               |
| 238U (KED)  | 11.100 ppb            | 17 cps            |               |

# Comprehensive

10/9/2021 4:31:46 PM

## Sample Summary

Instrument ID: iCAP Q

Analysis index: 2

Analysis name: blk

Analysis started at: 10/9/2021 3:15:41 PM

User name: WINDOWS-UPCI4ER\Administrator

| Category    | Concentration average | Concentration RSD |
|-------------|-----------------------|-------------------|
| 6Li (KED)   | 100.000 %             |                   |
| 9Be (KED)   | 0.000 ppb             |                   |
| 11B (KED)   | 1.846 ppb             |                   |
| 24Mg (KED)  | 0.078 ppb             |                   |
| 27Al (KED)  | 0.443 ppb             |                   |
| 45Sc (KED)  | 100.000 %             |                   |
| 51V (KED)   | 0.002 ppb             |                   |
| 52Cr (KED)  | -0.002 ppb            |                   |
| 55Mn (KED)  | 0.001 ppb             |                   |
| 56Fe (KED)  | -0.296 ppb            |                   |
| 58Ni (KED)  | -0.001 ppb            |                   |
| 59Co (KED)  | 0.001 ppb             |                   |
| 63Cu (KED)  | 0.023 ppb             |                   |
| 64Zn (KED)  | 0.072 ppb             |                   |
| 69Ga (KED)  | -0.003 ppb            |                   |
| 75As (KED)  | -0.009 ppb            |                   |
| 80Se (KED)  | 0.428 ppb             |                   |
| 85Rb (KED)  | -0.002 ppb            |                   |
| 88Sr (KED)  | 0.002 ppb             |                   |
| 89Y (KED)   | 100.000 %             |                   |
| 107Ag (KED) | 0.001 ppb             |                   |
| 114Cd (KED) | 0.000 ppb             |                   |
| 115In (KED) | 100.000 %             |                   |
| 133Cs (KED) | -0.001 ppb            |                   |
| 138Ba (KED) | -0.005 ppb            |                   |
| 139La (KED) | 0.001 ppb             |                   |
| 140Ce (KED) | -0.001 ppb            |                   |
| 141Pr (KED) | 0.001 ppb             |                   |
| 142Nd (KED) | 0.001 ppb             |                   |
| 152Sm (KED) | 0.000 ppb             |                   |
| 153Eu (KED) | 0.000 ppb             |                   |
| 158Gd (KED) | 0.000 ppb             |                   |
| 159Tb (KED) | 100.000 %             |                   |
| 164Dy (KED) | 0.000 ppb             |                   |
| 166Er (KED) | 0.000 ppb             |                   |
| 169Tm (KED) | 0.000 ppb             |                   |
| 174Yb (KED) | 0.000 ppb             |                   |
| 175Lu (KED) | 0.041 ppb             |                   |
| 205Tl (KED) | 0.000 ppb             |                   |
| 208Pb (KED) | 0.009 ppb             |                   |
| 209Bi (KED) | 100.000 %             |                   |
| 232Th (KED) | 0.000 ppb             |                   |
| 238U (KED)  | 0.001 ppb             |                   |

| Category   | Concentration average | Intensity average | Intensity RSD |
|------------|-----------------------|-------------------|---------------|
| 6Li (KED)  | 100.000 %             | 2,164 cps         |               |
| 9Be (KED)  | 0.000 ppb             | 0 cps             |               |
| 11B (KED)  | 1.846 ppb             | 1,273 cps         |               |
| 24Mg (KED) | 0.078 ppb             | 563 cps           |               |
| 27Al (KED) | 0.443 ppb             | 213 cps           |               |

# Comprehensive

10/9/2021 4:31:46 PM

| Category    | Concentration average | Intensity average | Intensity RSD |
|-------------|-----------------------|-------------------|---------------|
| 45Sc (KED)  | 100.000 %             | 45,637 cps        |               |
| 51V (KED)   | 0.002 ppb             | 17 cps            |               |
| 52Cr (KED)  | -0.002 ppb            | 187 cps           |               |
| 55Mn (KED)  | 0.001 ppb             | 123 cps           |               |
| 56Fe (KED)  | -0.296 ppb            | 5,728 cps         |               |
| 58Ni (KED)  | -0.001 ppb            | 523 cps           |               |
| 59Co (KED)  | 0.001 ppb             | 63 cps            |               |
| 63Cu (KED)  | 0.023 ppb             | 1,097 cps         |               |
| 64Zn (KED)  | 0.072 ppb             | 2,027 cps         |               |
| 69Ga (KED)  | -0.003 ppb            | 53 cps            |               |
| 75As (KED)  | -0.009 ppb            | 3 cps             |               |
| 80Se (KED)  | 0.428 ppb             | 1,873 cps         |               |
| 85Rb (KED)  | -0.002 ppb            | 10 cps            |               |
| 88Sr (KED)  | 0.002 ppb             | 303 cps           |               |
| 89Y (KED)   | 100.000 %             | 419,196 cps       |               |
| 107Ag (KED) | 0.001 ppb             | 33 cps            |               |
| 114Cd (KED) | 0.000 ppb             | 30 cps            |               |
| 115In (KED) | 100.000 %             | 754,100 cps       |               |
| 133Cs (KED) | -0.001 ppb            | 20 cps            |               |
| 138Ba (KED) | -0.005 ppb            | 1,217 cps         |               |
| 139La (KED) | 0.001 ppb             | 240 cps           |               |
| 140Ce (KED) | -0.001 ppb            | 570 cps           |               |
| 141Pr (KED) | 0.001 ppb             | 133 cps           |               |
| 142Nd (KED) | 0.001 ppb             | 167 cps           |               |
| 152Sm (KED) | 0.000 ppb             | 23 cps            |               |
| 153Eu (KED) | 0.000 ppb             | 27 cps            |               |
| 158Gd (KED) | 0.000 ppb             | 40 cps            |               |
| 159Tb (KED) | 100.000 %             | 3,183,036 cps     |               |
| 164Dy (KED) | 0.000 ppb             | 23 cps            |               |
| 166Er (KED) | 0.000 ppb             | 447 cps           |               |
| 169Tm (KED) | 0.000 ppb             | 97 cps            |               |
| 174Yb (KED) | 0.000 ppb             | 30 cps            |               |
| 175Lu (KED) | 0.041 ppb             | 47,162 cps        |               |
| 205Tl (KED) | 0.000 ppb             | 17 cps            |               |
| 208Pb (KED) | 0.009 ppb             | 9,230 cps         |               |
| 209Bi (KED) | 100.000 %             | 2,789,833 cps     |               |
| 232Th (KED) | 0.000 ppb             | 310 cps           |               |
| 238U (KED)  | 0.001 ppb             | 333 cps           |               |

# Comprehensive

10/9/2021 4:31:46 PM

## Sample Summary

Instrument ID: iCAP Q

Analysis index: 3

Analysis name: 0+20

Analysis started at: 10/9/2021 3:17:48 PM

User name: WINDOWS-UPCI4ER\Administrator

| Category    | Concentration average | Concentration RSD |
|-------------|-----------------------|-------------------|
| 6Li (KED)   | 102.774 %             |                   |
| 9Be (KED)   | 0.000 ppb             |                   |
| 11B (KED)   | 0.000 ppb             |                   |
| 24Mg (KED)  | 0.000 ppb             |                   |
| 27Al (KED)  | 0.000 ppb             |                   |
| 45Sc (KED)  | 104.201 %             |                   |
| 51V (KED)   | 0.000 ppb             |                   |
| 52Cr (KED)  | 0.000 ppb             |                   |
| 55Mn (KED)  | 0.000 ppb             |                   |
| 56Fe (KED)  | 0.000 ppb             |                   |
| 58Ni (KED)  | 0.000 ppb             |                   |
| 59Co (KED)  | 0.000 ppb             |                   |
| 63Cu (KED)  | 0.000 ppb             |                   |
| 64Zn (KED)  | 0.000 ppb             |                   |
| 69Ga (KED)  | 0.000 ppb             |                   |
| 75As (KED)  | 0.000 ppb             |                   |
| 80Se (KED)  | 0.000 ppb             |                   |
| 85Rb (KED)  | 0.000 ppb             |                   |
| 88Sr (KED)  | 0.000 ppb             |                   |
| 89Y (KED)   | 104.857 %             |                   |
| 107Ag (KED) | 0.000 ppb             |                   |
| 114Cd (KED) | 0.000 ppb             |                   |
| 115In (KED) | 102.050 %             |                   |
| 133Cs (KED) | 0.000 ppb             |                   |
| 138Ba (KED) | 0.000 ppb             |                   |
| 139La (KED) | 0.000 ppb             |                   |
| 140Ce (KED) | 0.000 ppb             |                   |
| 141Pr (KED) | 0.000 ppb             |                   |
| 142Nd (KED) | 0.000 ppb             |                   |
| 152Sm (KED) | 0.000 ppb             |                   |
| 153Eu (KED) | 0.000 ppb             |                   |
| 158Gd (KED) | 0.000 ppb             |                   |
| 159Tb (KED) | 101.720 %             |                   |
| 164Dy (KED) | 0.000 ppb             |                   |
| 166Er (KED) | 0.000 ppb             |                   |
| 169Tm (KED) | 0.000 ppb             |                   |
| 174Yb (KED) | 0.000 ppb             |                   |
| 175Lu (KED) | 0.000 ppb             |                   |
| 205Tl (KED) | 0.000 ppb             |                   |
| 208Pb (KED) | 0.000 ppb             |                   |
| 209Bi (KED) | 99.109 %              |                   |
| 232Th (KED) | 0.000 ppb             |                   |
| 238U (KED)  | 0.000 ppb             |                   |

| Category   | Concentration average | Intensity average | Intensity RSD |
|------------|-----------------------|-------------------|---------------|
| 6Li (KED)  | 102.774 %             | 2,224 cps         |               |
| 9Be (KED)  | 0.000 ppb             | 0 cps             |               |
| 11B (KED)  | 0.000 ppb             | 1,207 cps         |               |
| 24Mg (KED) | 0.000 ppb             | 547 cps           |               |
| 27Al (KED) | 0.000 ppb             | 167 cps           |               |

# Comprehensive

10/9/2021 4:31:46 PM

| Category    | Concentration average | Intensity average | Intensity RSD |
|-------------|-----------------------|-------------------|---------------|
| 45Sc (KED)  | 104.201 %             | 47,554 cps        |               |
| 51V (KED)   | 0.000 ppb             | 7 cps             |               |
| 52Cr (KED)  | 0.000 ppb             | 217 cps           |               |
| 55Mn (KED)  | 0.000 ppb             | 123 cps           |               |
| 56Fe (KED)  | 0.000 ppb             | 8,499 cps         |               |
| 58Ni (KED)  | 0.000 ppb             | 560 cps           |               |
| 59Co (KED)  | 0.000 ppb             | 43 cps            |               |
| 63Cu (KED)  | 0.000 ppb             | 860 cps           |               |
| 64Zn (KED)  | 0.000 ppb             | 1,877 cps         |               |
| 69Ga (KED)  | 0.000 ppb             | 73 cps            |               |
| 75As (KED)  | 0.000 ppb             | 13 cps            |               |
| 80Se (KED)  | 0.000 ppb             | 1,810 cps         |               |
| 85Rb (KED)  | 0.000 ppb             | 23 cps            |               |
| 88Sr (KED)  | 0.000 ppb             | 303 cps           |               |
| 89Y (KED)   | 104.857 %             | 439,555 cps       |               |
| 107Ag (KED) | 0.000 ppb             | 17 cps            |               |
| 114Cd (KED) | 0.000 ppb             | 37 cps            |               |
| 115In (KED) | 102.050 %             | 769,556 cps       |               |
| 133Cs (KED) | 0.000 ppb             | 43 cps            |               |
| 138Ba (KED) | 0.000 ppb             | 1,377 cps         |               |
| 139La (KED) | 0.000 ppb             | 207 cps           |               |
| 140Ce (KED) | 0.000 ppb             | 640 cps           |               |
| 141Pr (KED) | 0.000 ppb             | 70 cps            |               |
| 142Nd (KED) | 0.000 ppb             | 143 cps           |               |
| 152Sm (KED) | 0.000 ppb             | 27 cps            |               |
| 153Eu (KED) | 0.000 ppb             | 30 cps            |               |
| 158Gd (KED) | 0.000 ppb             | 37 cps            |               |
| 159Tb (KED) | 101.720 %             | 3,237,779 cps     |               |
| 164Dy (KED) | 0.000 ppb             | 20 cps            |               |
| 166Er (KED) | 0.000 ppb             | 447 cps           |               |
| 169Tm (KED) | 0.000 ppb             | 70 cps            |               |
| 174Yb (KED) | 0.000 ppb             | 40 cps            |               |
| 175Lu (KED) | 0.000 ppb             | 43,446 cps        |               |
| 205Tl (KED) | 0.000 ppb             | 40 cps            |               |
| 208Pb (KED) | 0.000 ppb             | 8,466 cps         |               |
| 209Bi (KED) | 99.109 %              | 2,764,987 cps     |               |
| 232Th (KED) | 0.000 ppb             | 347 cps           |               |
| 238U (KED)  | 0.000 ppb             | 207 cps           |               |

# Comprehensive

10/9/2021 4:31:46 PM

## Sample Summary

Instrument ID: iCAP Q

Analysis index: 4

Analysis name: 50+20

Analysis started at: 10/9/2021 3:20:17 PM

User name: WINDOWS-UPCI4ER\Administrator

| Category    | Concentration average | Concentration RSD |
|-------------|-----------------------|-------------------|
| 6Li (KED)   | 103.082 %             |                   |
| 9Be (KED)   | 45.582 ppb            |                   |
| 11B (KED)   | 62.993 ppb            |                   |
| 24Mg (KED)  | 44.659 ppb            |                   |
| 27Al (KED)  | 49.318 ppb            |                   |
| 45Sc (KED)  | 109.224 %             |                   |
| 51V (KED)   | 48.966 ppb            |                   |
| 52Cr (KED)  | 49.135 ppb            |                   |
| 55Mn (KED)  | 49.171 ppb            |                   |
| 56Fe (KED)  | 48.898 ppb            |                   |
| 58Ni (KED)  | 49.738 ppb            |                   |
| 59Co (KED)  | 48.893 ppb            |                   |
| 63Cu (KED)  | 49.526 ppb            |                   |
| 64Zn (KED)  | 49.452 ppb            |                   |
| 69Ga (KED)  | 49.000 ppb            |                   |
| 75As (KED)  | 49.235 ppb            |                   |
| 80Se (KED)  | 49.390 ppb            |                   |
| 85Rb (KED)  | 48.920 ppb            |                   |
| 88Sr (KED)  | 48.754 ppb            |                   |
| 89Y (KED)   | 107.211 %             |                   |
| 107Ag (KED) | 49.197 ppb            |                   |
| 114Cd (KED) | 49.821 ppb            |                   |
| 115In (KED) | 105.439 %             |                   |
| 133Cs (KED) | 48.205 ppb            |                   |
| 138Ba (KED) | 48.449 ppb            |                   |
| 139La (KED) | 47.987 ppb            |                   |
| 140Ce (KED) | 48.218 ppb            |                   |
| 141Pr (KED) | 48.004 ppb            |                   |
| 142Nd (KED) | 49.076 ppb            |                   |
| 152Sm (KED) | 48.959 ppb            |                   |
| 153Eu (KED) | 48.571 ppb            |                   |
| 158Gd (KED) | 47.879 ppb            |                   |
| 159Tb (KED) | 107.396 %             |                   |
| 164Dy (KED) | 49.966 ppb            |                   |
| 166Er (KED) | 49.454 ppb            |                   |
| 169Tm (KED) | 48.730 ppb            |                   |
| 174Yb (KED) | 49.769 ppb            |                   |
| 175Lu (KED) | 49.308 ppb            |                   |
| 205Tl (KED) | 47.859 ppb            |                   |
| 208Pb (KED) | 47.695 ppb            |                   |
| 209Bi (KED) | 106.309 %             |                   |
| 232Th (KED) | 47.901 ppb            |                   |
| 238U (KED)  | 47.825 ppb            |                   |

| Category   | Concentration average | Intensity average | Intensity RSD |
|------------|-----------------------|-------------------|---------------|
| 6Li (KED)  | 103.082 %             | 2,230 cps         |               |
| 9Be (KED)  | 45.582 ppb            | 4,554 cps         |               |
| 11B (KED)  | 62.993 ppb            | 4,701 cps         |               |
| 24Mg (KED) | 44.659 ppb            | 19,211 cps        |               |
| 27Al (KED) | 49.318 ppb            | 6,662 cps         |               |

# Comprehensive

10/9/2021 4:31:46 PM

| Category    | Concentration average | Intensity average | Intensity RSD |
|-------------|-----------------------|-------------------|---------------|
| 45Sc (KED)  | 109.224 %             | 49,846 cps        |               |
| 51V (KED)   | 48.966 ppb            | 315,324 cps       |               |
| 52Cr (KED)  | 49.135 ppb            | 469,746 cps       |               |
| 55Mn (KED)  | 49.171 ppb            | 266,567 cps       |               |
| 56Fe (KED)  | 48.898 ppb            | 446,597 cps       |               |
| 58Ni (KED)  | 49.738 ppb            | 528,784 cps       |               |
| 59Co (KED)  | 48.893 ppb            | 876,333 cps       |               |
| 63Cu (KED)  | 49.526 ppb            | 639,490 cps       |               |
| 64Zn (KED)  | 49.452 ppb            | 176,154 cps       |               |
| 69Ga (KED)  | 49.000 ppb            | 264,420 cps       |               |
| 75As (KED)  | 49.235 ppb            | 56,253 cps        |               |
| 80Se (KED)  | 49.390 ppb            | 20,043 cps        |               |
| 85Rb (KED)  | 48.920 ppb            | 259,561 cps       |               |
| 88Sr (KED)  | 48.754 ppb            | 382,553 cps       |               |
| 89Y (KED)   | 107.211 %             | 449,425 cps       |               |
| 107Ag (KED) | 49.197 ppb            | 1,653,737 cps     |               |
| 114Cd (KED) | 49.821 ppb            | 637,454 cps       |               |
| 115In (KED) | 105.439 %             | 795,116 cps       |               |
| 133Cs (KED) | 48.205 ppb            | 1,198,335 cps     |               |
| 138Ba (KED) | 48.449 ppb            | 1,508,179 cps     |               |
| 139La (KED) | 47.987 ppb            | 2,918,383 cps     |               |
| 140Ce (KED) | 48.218 ppb            | 3,719,815 cps     |               |
| 141Pr (KED) | 48.004 ppb            | 4,003,827 cps     |               |
| 142Nd (KED) | 49.076 ppb            | 1,616,434 cps     |               |
| 152Sm (KED) | 48.959 ppb            | 1,449,376 cps     |               |
| 153Eu (KED) | 48.571 ppb            | 2,853,110 cps     |               |
| 158Gd (KED) | 47.879 ppb            | 1,778,858 cps     |               |
| 159Tb (KED) | 107.396 %             | 3,418,451 cps     |               |
| 164Dy (KED) | 49.966 ppb            | 2,110,037 cps     |               |
| 166Er (KED) | 49.454 ppb            | 2,481,348 cps     |               |
| 169Tm (KED) | 48.730 ppb            | 8,012,039 cps     |               |
| 174Yb (KED) | 49.769 ppb            | 2,898,409 cps     |               |
| 175Lu (KED) | 49.308 ppb            | 5,771,397 cps     |               |
| 205Tl (KED) | 47.859 ppb            | 5,469,080 cps     |               |
| 208Pb (KED) | 47.695 ppb            | 3,960,058 cps     |               |
| 209Bi (KED) | 106.309 %             | 2,965,830 cps     |               |
| 232Th (KED) | 47.901 ppb            | 7,978,282 cps     |               |
| 238U (KED)  | 47.825 ppb            | 9,126,513 cps     |               |

# Comprehensive

10/9/2021 4:31:46 PM

## Sample Summary

Instrument ID: iCAP Q

Analysis index: 5

Analysis name: 100+20

Analysis started at: 10/9/2021 3:23:07 PM

User name: WINDOWS-UPCI4ER\Administrator

| Category    | Concentration average | Concentration RSD |
|-------------|-----------------------|-------------------|
| 6Li (KED)   | 98.459 %              |                   |
| 9Be (KED)   | 102.209 ppb           |                   |
| 11B (KED)   | 93.503 ppb            |                   |
| 24Mg (KED)  | 102.670 ppb           |                   |
| 27Al (KED)  | 100.341 ppb           |                   |
| 45Sc (KED)  | 112.854 %             |                   |
| 51V (KED)   | 100.517 ppb           |                   |
| 52Cr (KED)  | 100.433 ppb           |                   |
| 55Mn (KED)  | 100.415 ppb           |                   |
| 56Fe (KED)  | 100.551 ppb           |                   |
| 58Ni (KED)  | 100.131 ppb           |                   |
| 59Co (KED)  | 100.554 ppb           |                   |
| 63Cu (KED)  | 100.237 ppb           |                   |
| 64Zn (KED)  | 100.274 ppb           |                   |
| 69Ga (KED)  | 100.500 ppb           |                   |
| 75As (KED)  | 100.383 ppb           |                   |
| 80Se (KED)  | 100.305 ppb           |                   |
| 85Rb (KED)  | 100.540 ppb           |                   |
| 88Sr (KED)  | 100.623 ppb           |                   |
| 89Y (KED)   | 110.863 %             |                   |
| 107Ag (KED) | 100.402 ppb           |                   |
| 114Cd (KED) | 100.090 ppb           |                   |
| 115In (KED) | 108.963 %             |                   |
| 133Cs (KED) | 100.898 ppb           |                   |
| 138Ba (KED) | 100.776 ppb           |                   |
| 139La (KED) | 101.007 ppb           |                   |
| 140Ce (KED) | 100.891 ppb           |                   |
| 141Pr (KED) | 100.998 ppb           |                   |
| 142Nd (KED) | 100.462 ppb           |                   |
| 152Sm (KED) | 100.521 ppb           |                   |
| 153Eu (KED) | 100.715 ppb           |                   |
| 158Gd (KED) | 101.060 ppb           |                   |
| 159Tb (KED) | 111.219 %             |                   |
| 164Dy (KED) | 100.017 ppb           |                   |
| 166Er (KED) | 100.273 ppb           |                   |
| 169Tm (KED) | 100.635 ppb           |                   |
| 174Yb (KED) | 100.116 ppb           |                   |
| 175Lu (KED) | 100.346 ppb           |                   |
| 205Tl (KED) | 101.071 ppb           |                   |
| 208Pb (KED) | 101.152 ppb           |                   |
| 209Bi (KED) | 107.531 %             |                   |
| 232Th (KED) | 101.050 ppb           |                   |
| 238U (KED)  | 101.088 ppb           |                   |

| Category   | Concentration average | Intensity average | Intensity RSD |
|------------|-----------------------|-------------------|---------------|
| 6Li (KED)  | 98.459 %              | 2,130 cps         |               |
| 9Be (KED)  | 102.209 ppb           | 9,754 cps         |               |
| 11B (KED)  | 93.503 ppb            | 6,105 cps         |               |
| 24Mg (KED) | 102.670 ppb           | 41,506 cps        |               |
| 27Al (KED) | 100.341 ppb           | 13,818 cps        |               |

# Comprehensive

10/9/2021 4:31:46 PM

| Category    | Concentration average | Intensity average | Intensity RSD |
|-------------|-----------------------|-------------------|---------------|
| 45Sc (KED)  | 112.854 %             | 51,503 cps        |               |
| 51V (KED)   | 100.517 ppb           | 668,804 cps       |               |
| 52Cr (KED)  | 100.433 ppb           | 991,847 cps       |               |
| 55Mn (KED)  | 100.415 ppb           | 562,327 cps       |               |
| 56Fe (KED)  | 100.551 ppb           | 939,158 cps       |               |
| 58Ni (KED)  | 100.131 ppb           | 1,099,294 cps     |               |
| 59Co (KED)  | 100.554 ppb           | 1,862,138 cps     |               |
| 63Cu (KED)  | 100.237 ppb           | 1,337,439 cps     |               |
| 64Zn (KED)  | 100.274 ppb           | 367,313 cps       |               |
| 69Ga (KED)  | 100.500 ppb           | 560,722 cps       |               |
| 75As (KED)  | 100.383 ppb           | 118,584 cps       |               |
| 80Se (KED)  | 100.305 ppb           | 40,118 cps        |               |
| 85Rb (KED)  | 100.540 ppb           | 551,584 cps       |               |
| 88Sr (KED)  | 100.623 ppb           | 816,101 cps       |               |
| 89Y (KED)   | 110.863 %             | 464,732 cps       |               |
| 107Ag (KED) | 100.402 ppb           | 3,487,771 cps     |               |
| 114Cd (KED) | 100.090 ppb           | 1,323,406 cps     |               |
| 115In (KED) | 108.963 %             | 821,691 cps       |               |
| 133Cs (KED) | 100.898 ppb           | 2,592,034 cps     |               |
| 138Ba (KED) | 100.776 ppb           | 3,247,147 cps     |               |
| 139La (KED) | 101.007 ppb           | 6,361,310 cps     |               |
| 140Ce (KED) | 100.891 ppb           | 8,059,543 cps     |               |
| 141Pr (KED) | 100.998 ppb           | 8,723,558 cps     |               |
| 142Nd (KED) | 100.462 ppb           | 3,426,573 cps     |               |
| 152Sm (KED) | 100.521 ppb           | 3,081,706 cps     |               |
| 153Eu (KED) | 100.715 ppb           | 6,126,714 cps     |               |
| 158Gd (KED) | 101.060 ppb           | 3,888,341 cps     |               |
| 159Tb (KED) | 111.219 %             | 3,540,149 cps     |               |
| 164Dy (KED) | 100.017 ppb           | 4,374,011 cps     |               |
| 166Er (KED) | 100.273 ppb           | 5,209,740 cps     |               |
| 169Tm (KED) | 100.635 ppb           | 17,134,902 cps    |               |
| 174Yb (KED) | 100.116 ppb           | 6,037,990 cps     |               |
| 175Lu (KED) | 100.346 ppb           | 12,114,204 cps    |               |
| 205Tl (KED) | 101.071 ppb           | 11,682,666 cps    |               |
| 208Pb (KED) | 101.152 ppb           | 8,484,763 cps     |               |
| 209Bi (KED) | 107.531 %             | 2,999,926 cps     |               |
| 232Th (KED) | 101.050 ppb           | 17,023,857 cps    |               |
| 238U (KED)  | 101.088 ppb           | 19,512,350 cps    |               |

# Comprehensive

10/9/2021 4:31:46 PM

## Sample Summary

Instrument ID: iCAP Q

Analysis index: 6

Analysis name: 11ti

Analysis started at: 10/9/2021 3:25:42 PM

User name: WINDOWS-UPCI4ER\Administrator

| Category    | Concentration average | Concentration RSD |
|-------------|-----------------------|-------------------|
| 6Li (KED)   | 115.410 %             |                   |
| 9Be (KED)   | 0.060 ppb             |                   |
| 11B (KED)   | -12.494 ppb           |                   |
| 24Mg (KED)  | 462.221 ppb           |                   |
| 27Al (KED)  | 418.671 ppb           |                   |
| 45Sc (KED)  | 116.507 %             |                   |
| 51V (KED)   | 0.899 ppb             |                   |
| 52Cr (KED)  | 12.217 ppb            |                   |
| 55Mn (KED)  | 17.081 ppb            |                   |
| 56Fe (KED)  | 524.764 ppb           |                   |
| 58Ni (KED)  | 4.139 ppb             |                   |
| 59Co (KED)  | 0.679 ppb             |                   |
| 63Cu (KED)  | 14.366 ppb            |                   |
| 64Zn (KED)  | 241.961 ppb           |                   |
| 69Ga (KED)  | 2.122 ppb             |                   |
| 75As (KED)  | 1.233 ppb             |                   |
| 80Se (KED)  | 0.520 ppb             |                   |
| 85Rb (KED)  | 3.629 ppb             |                   |
| 88Sr (KED)  | 8.841 ppb             |                   |
| 89Y (KED)   | 118.134 %             |                   |
| 107Ag (KED) | 0.052 ppb             |                   |
| 114Cd (KED) | 0.077 ppb             |                   |
| 115In (KED) | 114.036 %             |                   |
| 133Cs (KED) | 0.079 ppb             |                   |
| 138Ba (KED) | 9.486 ppb             |                   |
| 139La (KED) | 0.560 ppb             |                   |
| 140Ce (KED) | 1.124 ppb             |                   |
| 141Pr (KED) | 0.135 ppb             |                   |
| 142Nd (KED) | 0.731 ppb             |                   |
| 152Sm (KED) | 0.102 ppb             |                   |
| 153Eu (KED) | 0.020 ppb             |                   |
| 158Gd (KED) | 0.089 ppb             |                   |
| 159Tb (KED) | 124.333 %             |                   |
| 164Dy (KED) | 0.063 ppb             |                   |
| 166Er (KED) | 0.032 ppb             |                   |
| 169Tm (KED) | 0.005 ppb             |                   |
| 174Yb (KED) | 0.024 ppb             |                   |
| 175Lu (KED) | -0.118 ppb            |                   |
| 205Tl (KED) | 0.013 ppb             |                   |
| 208Pb (KED) | 3.441 ppb             |                   |
| 209Bi (KED) | 113.901 %             |                   |
| 232Th (KED) | 0.191 ppb             |                   |
| 238U (KED)  | 0.057 ppb             |                   |

| Category   | Concentration average | Intensity average | Intensity RSD |
|------------|-----------------------|-------------------|---------------|
| 6Li (KED)  | 115.410 %             | 2,497 cps         |               |
| 9Be (KED)  | 0.060 ppb             | 7 cps             |               |
| 11B (KED)  | -12.494 ppb           | 580 cps           |               |
| 24Mg (KED) | 462.221 ppb           | 216,877 cps       |               |
| 27Al (KED) | 418.671 ppb           | 58,929 cps        |               |

# Comprehensive

10/9/2021 4:31:46 PM

| Category    | Concentration average | Intensity average | Intensity RSD |
|-------------|-----------------------|-------------------|---------------|
| 45Sc (KED)  | 116.507 %             | 53,170 cps        |               |
| 51V (KED)   | 0.899 ppb             | 6,182 cps         |               |
| 52Cr (KED)  | 12.217 ppb            | 124,771 cps       |               |
| 55Mn (KED)  | 17.081 ppb            | 98,864 cps        |               |
| 56Fe (KED)  | 524.764 ppb           | 5,019,916 cps     |               |
| 58Ni (KED)  | 4.139 ppb             | 47,507 cps        |               |
| 59Co (KED)  | 0.679 ppb             | 13,027 cps        |               |
| 63Cu (KED)  | 14.366 ppb            | 205,078 cps       |               |
| 64Zn (KED)  | 241.961 ppb           | 941,470 cps       |               |
| 69Ga (KED)  | 2.122 ppb             | 12,696 cps        |               |
| 75As (KED)  | 1.233 ppb             | 1,567 cps         |               |
| 80Se (KED)  | 0.520 ppb             | 2,250 cps         |               |
| 85Rb (KED)  | 3.629 ppb             | 21,241 cps        |               |
| 88Sr (KED)  | 8.841 ppb             | 76,722 cps        |               |
| 89Y (KED)   | 118.134 %             | 495,214 cps       |               |
| 107Ag (KED) | 0.052 ppb             | 1,903 cps         |               |
| 114Cd (KED) | 0.077 ppb             | 1,100 cps         |               |
| 115In (KED) | 114.036 %             | 859,943 cps       |               |
| 133Cs (KED) | 0.079 ppb             | 2,167 cps         |               |
| 138Ba (KED) | 9.486 ppb             | 343,203 cps       |               |
| 139La (KED) | 0.560 ppb             | 39,680 cps        |               |
| 140Ce (KED) | 1.124 ppb             | 101,178 cps       |               |
| 141Pr (KED) | 0.135 ppb             | 13,117 cps        |               |
| 142Nd (KED) | 0.731 ppb             | 28,048 cps        |               |
| 152Sm (KED) | 0.102 ppb             | 3,544 cps         |               |
| 153Eu (KED) | 0.020 ppb             | 1,430 cps         |               |
| 158Gd (KED) | 0.089 ppb             | 3,894 cps         |               |
| 159Tb (KED) | 124.333 %             | 3,957,555 cps     |               |
| 164Dy (KED) | 0.063 ppb             | 3,124 cps         |               |
| 166Er (KED) | 0.032 ppb             | 2,420 cps         |               |
| 169Tm (KED) | 0.005 ppb             | 1,093 cps         |               |
| 174Yb (KED) | 0.024 ppb             | 1,700 cps         |               |
| 175Lu (KED) | -0.118 ppb            | 37,249 cps        |               |
| 205Tl (KED) | 0.013 ppb             | 1,580 cps         |               |
| 208Pb (KED) | 3.441 ppb             | 315,120 cps       |               |
| 209Bi (KED) | 113.901 %             | 3,177,653 cps     |               |
| 232Th (KED) | 0.191 ppb             | 34,484 cps        |               |
| 238U (KED)  | 0.057 ppb             | 11,989 cps        |               |

# Comprehensive

10/9/2021 4:31:46 PM

## Sample Summary

Instrument ID: iCAP Q

Analysis index: 7

Analysis name: 2ti

Analysis started at: 10/9/2021 3:28:26 PM

User name: WINDOWS-UPCI4ER\Administrator

| Category    | Concentration average | Concentration RSD |
|-------------|-----------------------|-------------------|
| 6Li (KED)   | 132.978 %             |                   |
| 9Be (KED)   | 0.026 ppb             |                   |
| 11B (KED)   | -16.387 ppb           |                   |
| 24Mg (KED)  | 416.298 ppb           |                   |
| 27Al (KED)  | 460.902 ppb           |                   |
| 45Sc (KED)  | 128.194 %             |                   |
| 51V (KED)   | 0.926 ppb             |                   |
| 52Cr (KED)  | 11.203 ppb            |                   |
| 55Mn (KED)  | 15.031 ppb            |                   |
| 56Fe (KED)  | 553.248 ppb           |                   |
| 58Ni (KED)  | 3.385 ppb             |                   |
| 59Co (KED)  | 0.293 ppb             |                   |
| 63Cu (KED)  | 8.078 ppb             |                   |
| 64Zn (KED)  | 199.780 ppb           |                   |
| 69Ga (KED)  | 1.458 ppb             |                   |
| 75As (KED)  | 0.313 ppb             |                   |
| 80Se (KED)  | 0.716 ppb             |                   |
| 85Rb (KED)  | 2.117 ppb             |                   |
| 88Sr (KED)  | 6.638 ppb             |                   |
| 89Y (KED)   | 129.813 %             |                   |
| 107Ag (KED) | 0.048 ppb             |                   |
| 114Cd (KED) | 0.064 ppb             |                   |
| 115In (KED) | 127.949 %             |                   |
| 133Cs (KED) | 0.074 ppb             |                   |
| 138Ba (KED) | 6.376 ppb             |                   |
| 139La (KED) | 0.527 ppb             |                   |
| 140Ce (KED) | 1.103 ppb             |                   |
| 141Pr (KED) | 0.132 ppb             |                   |
| 142Nd (KED) | 0.725 ppb             |                   |
| 152Sm (KED) | 0.105 ppb             |                   |
| 153Eu (KED) | 0.017 ppb             |                   |
| 158Gd (KED) | 0.084 ppb             |                   |
| 159Tb (KED) | 137.026 %             |                   |
| 164Dy (KED) | 0.057 ppb             |                   |
| 166Er (KED) | 0.026 ppb             |                   |
| 169Tm (KED) | 0.004 ppb             |                   |
| 174Yb (KED) | 0.022 ppb             |                   |
| 175Lu (KED) | -0.141 ppb            |                   |
| 205Tl (KED) | 0.010 ppb             |                   |
| 208Pb (KED) | 1.247 ppb             |                   |
| 209Bi (KED) | 126.636 %             |                   |
| 232Th (KED) | 0.235 ppb             |                   |
| 238U (KED)  | 0.037 ppb             |                   |

| Category   | Concentration average | Intensity average | Intensity RSD |
|------------|-----------------------|-------------------|---------------|
| 6Li (KED)  | 132.978 %             | 2,877 cps         |               |
| 9Be (KED)  | 0.026 ppb             | 3 cps             |               |
| 11B (KED)  | -16.387 ppb           | 390 cps           |               |
| 24Mg (KED) | 416.298 ppb           | 225,133 cps       |               |
| 27Al (KED) | 460.902 ppb           | 71,360 cps        |               |

# Comprehensive

10/9/2021 4:31:46 PM

| Category    | Concentration average | Intensity average | Intensity RSD |
|-------------|-----------------------|-------------------|---------------|
| 45Sc (KED)  | 128.194 %             | 58,503 cps        |               |
| 51V (KED)   | 0.926 ppb             | 7,005 cps         |               |
| 52Cr (KED)  | 11.203 ppb            | 125,915 cps       |               |
| 55Mn (KED)  | 15.031 ppb            | 95,742 cps        |               |
| 56Fe (KED)  | 553.248 ppb           | 5,822,739 cps     |               |
| 58Ni (KED)  | 3.385 ppb             | 42,873 cps        |               |
| 59Co (KED)  | 0.293 ppb             | 6,215 cps         |               |
| 63Cu (KED)  | 8.078 ppb             | 127,188 cps       |               |
| 64Zn (KED)  | 199.780 ppb           | 854,598 cps       |               |
| 69Ga (KED)  | 1.458 ppb             | 9,614 cps         |               |
| 75As (KED)  | 0.313 ppb             | 450 cps           |               |
| 80Se (KED)  | 0.716 ppb             | 2,560 cps         |               |
| 85Rb (KED)  | 2.117 ppb             | 13,631 cps        |               |
| 88Sr (KED)  | 6.638 ppb             | 63,387 cps        |               |
| 89Y (KED)   | 129.813 %             | 544,171 cps       |               |
| 107Ag (KED) | 0.048 ppb             | 1,960 cps         |               |
| 114Cd (KED) | 0.064 ppb             | 1,040 cps         |               |
| 115In (KED) | 127.949 %             | 964,865 cps       |               |
| 133Cs (KED) | 0.074 ppb             | 2,300 cps         |               |
| 138Ba (KED) | 6.376 ppb             | 254,851 cps       |               |
| 139La (KED) | 0.527 ppb             | 41,201 cps        |               |
| 140Ce (KED) | 1.103 ppb             | 109,420 cps       |               |
| 141Pr (KED) | 0.132 ppb             | 14,118 cps        |               |
| 142Nd (KED) | 0.725 ppb             | 30,648 cps        |               |
| 152Sm (KED) | 0.105 ppb             | 4,017 cps         |               |
| 153Eu (KED) | 0.017 ppb             | 1,337 cps         |               |
| 158Gd (KED) | 0.084 ppb             | 4,034 cps         |               |
| 159Tb (KED) | 137.026 %             | 4,361,600 cps     |               |
| 164Dy (KED) | 0.057 ppb             | 3,100 cps         |               |
| 166Er (KED) | 0.026 ppb             | 2,244 cps         |               |
| 169Tm (KED) | 0.004 ppb             | 913 cps           |               |
| 174Yb (KED) | 0.022 ppb             | 1,663 cps         |               |
| 175Lu (KED) | -0.141 ppb            | 37,630 cps        |               |
| 205Tl (KED) | 0.010 ppb             | 1,367 cps         |               |
| 208Pb (KED) | 1.247 ppb             | 133,823 cps       |               |
| 209Bi (KED) | 126.636 %             | 3,532,938 cps     |               |
| 232Th (KED) | 0.235 ppb             | 47,082 cps        |               |
| 238U (KED)  | 0.037 ppb             | 8,783 cps         |               |

# Comprehensive

10/9/2021 4:31:46 PM

## Sample Summary

Instrument ID: iCAP Q

Analysis index: 8

Analysis name: w19ti

Analysis started at: 10/9/2021 3:31:18 PM

User name: WINDOWS-UPCI4ER\Administrator

| Category    | Concentration average | Concentration RSD |
|-------------|-----------------------|-------------------|
| 6Li (KED)   | 145.923 %             |                   |
| 9Be (KED)   | 0.071 ppb             |                   |
| 11B (KED)   | -12.749 ppb           |                   |
| 24Mg (KED)  | 824.508 ppb           |                   |
| 27Al (KED)  | 1,033.162 ppb         |                   |
| 45Sc (KED)  | 142.214 %             |                   |
| 51V (KED)   | 1.904 ppb             |                   |
| 52Cr (KED)  | 3.676 ppb             |                   |
| 55Mn (KED)  | 30.860 ppb            |                   |
| 56Fe (KED)  | 1,131.793 ppb         |                   |
| 58Ni (KED)  | 5.333 ppb             |                   |
| 59Co (KED)  | 0.469 ppb             |                   |
| 63Cu (KED)  | 10.726 ppb            |                   |
| 64Zn (KED)  | 164.153 ppb           |                   |
| 69Ga (KED)  | 3.038 ppb             |                   |
| 75As (KED)  | 0.492 ppb             |                   |
| 80Se (KED)  | 0.865 ppb             |                   |
| 85Rb (KED)  | 4.156 ppb             |                   |
| 88Sr (KED)  | 13.340 ppb            |                   |
| 89Y (KED)   | 141.532 %             |                   |
| 107Ag (KED) | 0.092 ppb             |                   |
| 114Cd (KED) | 0.063 ppb             |                   |
| 115In (KED) | 132.828 %             |                   |
| 133Cs (KED) | 0.175 ppb             |                   |
| 138Ba (KED) | 12.714 ppb            |                   |
| 139La (KED) | 1.223 ppb             |                   |
| 140Ce (KED) | 2.431 ppb             |                   |
| 141Pr (KED) | 0.286 ppb             |                   |
| 142Nd (KED) | 1.495 ppb             |                   |
| 152Sm (KED) | 0.195 ppb             |                   |
| 153Eu (KED) | 0.040 ppb             |                   |
| 158Gd (KED) | 0.170 ppb             |                   |
| 159Tb (KED) | 149.878 %             |                   |
| 164Dy (KED) | 0.114 ppb             |                   |
| 166Er (KED) | 0.059 ppb             |                   |
| 169Tm (KED) | 0.008 ppb             |                   |
| 174Yb (KED) | 0.043 ppb             |                   |
| 175Lu (KED) | -0.178 ppb            |                   |
| 205Tl (KED) | 0.016 ppb             |                   |
| 208Pb (KED) | 1.509 ppb             |                   |
| 209Bi (KED) | 126.619 %             |                   |
| 232Th (KED) | 0.348 ppb             |                   |
| 238U (KED)  | 0.064 ppb             |                   |

| Category   | Concentration average | Intensity average | Intensity RSD |
|------------|-----------------------|-------------------|---------------|
| 6Li (KED)  | 145.923 %             | 3,157 cps         |               |
| 9Be (KED)  | 0.071 ppb             | 10 cps            |               |
| 11B (KED)  | -12.749 ppb           | 713 cps           |               |
| 24Mg (KED) | 824.508 ppb           | 488,538 cps       |               |
| 27Al (KED) | 1,033.162 ppb         | 177,172 cps       |               |

# Comprehensive

10/9/2021 4:31:46 PM

| Category    | Concentration average | Intensity average | Intensity RSD |
|-------------|-----------------------|-------------------|---------------|
| 45Sc (KED)  | 142.214 %             | 64,902 cps        |               |
| 51V (KED)   | 1.904 ppb             | 15,974 cps        |               |
| 52Cr (KED)  | 3.676 ppb             | 46,035 cps        |               |
| 55Mn (KED)  | 30.860 ppb            | 217,896 cps       |               |
| 56Fe (KED)  | 1,131.793 ppb         | 13,202,278 cps    |               |
| 58Ni (KED)  | 5.333 ppb             | 74,508 cps        |               |
| 59Co (KED)  | 0.469 ppb             | 11,005 cps        |               |
| 63Cu (KED)  | 10.726 ppb            | 183,745 cps       |               |
| 64Zn (KED)  | 164.153 ppb           | 766,038 cps       |               |
| 69Ga (KED)  | 3.038 ppb             | 21,736 cps        |               |
| 75As (KED)  | 0.492 ppb             | 760 cps           |               |
| 80Se (KED)  | 0.865 ppb             | 2,864 cps         |               |
| 85Rb (KED)  | 4.156 ppb             | 29,141 cps        |               |
| 88Sr (KED)  | 13.340 ppb            | 138,478 cps       |               |
| 89Y (KED)   | 141.532 %             | 593,295 cps       |               |
| 107Ag (KED) | 0.092 ppb             | 3,924 cps         |               |
| 114Cd (KED) | 0.063 ppb             | 1,067 cps         |               |
| 115In (KED) | 132.828 %             | 1,001,659 cps     |               |
| 133Cs (KED) | 0.175 ppb             | 5,541 cps         |               |
| 138Ba (KED) | 12.714 ppb            | 553,834 cps       |               |
| 139La (KED) | 1.223 ppb             | 104,115 cps       |               |
| 140Ce (KED) | 2.431 ppb             | 262,602 cps       |               |
| 141Pr (KED) | 0.286 ppb             | 33,368 cps        |               |
| 142Nd (KED) | 1.495 ppb             | 68,920 cps        |               |
| 152Sm (KED) | 0.195 ppb             | 8,103 cps         |               |
| 153Eu (KED) | 0.040 ppb             | 3,340 cps         |               |
| 158Gd (KED) | 0.170 ppb             | 8,890 cps         |               |
| 159Tb (KED) | 149.878 %             | 4,770,664 cps     |               |
| 164Dy (KED) | 0.114 ppb             | 6,718 cps         |               |
| 166Er (KED) | 0.059 ppb             | 4,758 cps         |               |
| 169Tm (KED) | 0.008 ppb             | 1,837 cps         |               |
| 174Yb (KED) | 0.043 ppb             | 3,544 cps         |               |
| 175Lu (KED) | -0.178 ppb            | 35,163 cps        |               |
| 205Tl (KED) | 0.016 ppb             | 2,247 cps         |               |
| 208Pb (KED) | 1.509 ppb             | 159,666 cps       |               |
| 209Bi (KED) | 126.619 %             | 3,532,456 cps     |               |
| 232Th (KED) | 0.348 ppb             | 69,429 cps        |               |
| 238U (KED)  | 0.064 ppb             | 14,866 cps        |               |

# Comprehensive

10/9/2021 4:31:46 PM

## Sample Summary

Instrument ID: iCAP Q

Analysis index: 9

Analysis name: 7ti

Analysis started at: 10/9/2021 3:34:03 PM

User name: WINDOWS-UPCI4ER\Administrator

| Category    | Concentration average | Concentration RSD |
|-------------|-----------------------|-------------------|
| 6Li (KED)   | 152.395 %             |                   |
| 9Be (KED)   | 0.068 ppb             |                   |
| 11B (KED)   | -13.461 ppb           |                   |
| 24Mg (KED)  | 802.669 ppb           |                   |
| 27Al (KED)  | 916.670 ppb           |                   |
| 45Sc (KED)  | 154.412 %             |                   |
| 51V (KED)   | 1.699 ppb             |                   |
| 52Cr (KED)  | 3.216 ppb             |                   |
| 55Mn (KED)  | 28.734 ppb            |                   |
| 56Fe (KED)  | 1,043.478 ppb         |                   |
| 58Ni (KED)  | 4.883 ppb             |                   |
| 59Co (KED)  | 0.506 ppb             |                   |
| 63Cu (KED)  | 10.071 ppb            |                   |
| 64Zn (KED)  | 177.706 ppb           |                   |
| 69Ga (KED)  | 2.990 ppb             |                   |
| 75As (KED)  | 0.424 ppb             |                   |
| 80Se (KED)  | 1.238 ppb             |                   |
| 85Rb (KED)  | 5.167 ppb             |                   |
| 88Sr (KED)  | 12.364 ppb            |                   |
| 89Y (KED)   | 150.143 %             |                   |
| 107Ag (KED) | 0.115 ppb             |                   |
| 114Cd (KED) | 0.124 ppb             |                   |
| 115In (KED) | 144.399 %             |                   |
| 133Cs (KED) | 0.161 ppb             |                   |
| 138Ba (KED) | 11.920 ppb            |                   |
| 139La (KED) | 0.942 ppb             |                   |
| 140Ce (KED) | 2.012 ppb             |                   |
| 141Pr (KED) | 0.243 ppb             |                   |
| 142Nd (KED) | 1.262 ppb             |                   |
| 152Sm (KED) | 0.176 ppb             |                   |
| 153Eu (KED) | 0.034 ppb             |                   |
| 158Gd (KED) | 0.150 ppb             |                   |
| 159Tb (KED) | 155.752 %             |                   |
| 164Dy (KED) | 0.113 ppb             |                   |
| 166Er (KED) | 0.052 ppb             |                   |
| 169Tm (KED) | 0.007 ppb             |                   |
| 174Yb (KED) | 0.039 ppb             |                   |
| 175Lu (KED) | -0.192 ppb            |                   |
| 205Tl (KED) | 0.013 ppb             |                   |
| 208Pb (KED) | 1.719 ppb             |                   |
| 209Bi (KED) | 133.996 %             |                   |
| 232Th (KED) | 0.339 ppb             |                   |
| 238U (KED)  | 0.062 ppb             |                   |

| Category   | Concentration average | Intensity average | Intensity RSD |
|------------|-----------------------|-------------------|---------------|
| 6Li (KED)  | 152.395 %             | 3,297 cps         |               |
| 9Be (KED)  | 0.068 ppb             | 10 cps            |               |
| 11B (KED)  | -13.461 ppb           | 687 cps           |               |
| 24Mg (KED) | 802.669 ppb           | 496,715 cps       |               |
| 27Al (KED) | 916.670 ppb           | 170,707 cps       |               |

# Comprehensive

10/9/2021 4:31:46 PM

| Category    | Concentration average | Intensity average | Intensity RSD |
|-------------|-----------------------|-------------------|---------------|
| 45Sc (KED)  | 154.412 %             | 70,468 cps        |               |
| 51V (KED)   | 1.699 ppb             | 15,476 cps        |               |
| 52Cr (KED)  | 3.216 ppb             | 43,773 cps        |               |
| 55Mn (KED)  | 28.734 ppb            | 220,301 cps       |               |
| 56Fe (KED)  | 1,043.478 ppb         | 13,217,101 cps    |               |
| 58Ni (KED)  | 4.883 ppb             | 74,143 cps        |               |
| 59Co (KED)  | 0.506 ppb             | 12,873 cps        |               |
| 63Cu (KED)  | 10.071 ppb            | 183,102 cps       |               |
| 64Zn (KED)  | 177.706 ppb           | 879,521 cps       |               |
| 69Ga (KED)  | 2.990 ppb             | 22,694 cps        |               |
| 75As (KED)  | 0.424 ppb             | 697 cps           |               |
| 80Se (KED)  | 1.238 ppb             | 3,230 cps         |               |
| 85Rb (KED)  | 5.167 ppb             | 38,422 cps        |               |
| 88Sr (KED)  | 12.364 ppb            | 136,189 cps       |               |
| 89Y (KED)   | 150.143 %             | 629,395 cps       |               |
| 107Ag (KED) | 0.115 ppb             | 5,318 cps         |               |
| 114Cd (KED) | 0.124 ppb             | 2,217 cps         |               |
| 115In (KED) | 144.399 %             | 1,088,909 cps     |               |
| 133Cs (KED) | 0.161 ppb             | 5,555 cps         |               |
| 138Ba (KED) | 11.920 ppb            | 539,744 cps       |               |
| 139La (KED) | 0.942 ppb             | 83,374 cps        |               |
| 140Ce (KED) | 2.012 ppb             | 226,085 cps       |               |
| 141Pr (KED) | 0.243 ppb             | 29,535 cps        |               |
| 142Nd (KED) | 1.262 ppb             | 60,483 cps        |               |
| 152Sm (KED) | 0.176 ppb             | 7,586 cps         |               |
| 153Eu (KED) | 0.034 ppb             | 2,900 cps         |               |
| 158Gd (KED) | 0.150 ppb             | 8,129 cps         |               |
| 159Tb (KED) | 155.752 %             | 4,957,634 cps     |               |
| 164Dy (KED) | 0.113 ppb             | 6,932 cps         |               |
| 166Er (KED) | 0.052 ppb             | 4,447 cps         |               |
| 169Tm (KED) | 0.007 ppb             | 1,713 cps         |               |
| 174Yb (KED) | 0.039 ppb             | 3,397 cps         |               |
| 175Lu (KED) | -0.192 ppb            | 34,194 cps        |               |
| 205Tl (KED) | 0.013 ppb             | 1,873 cps         |               |
| 208Pb (KED) | 1.719 ppb             | 190,974 cps       |               |
| 209Bi (KED) | 133.996 %             | 3,738,265 cps     |               |
| 232Th (KED) | 0.339 ppb             | 71,605 cps        |               |
| 238U (KED)  | 0.062 ppb             | 15,246 cps        |               |

# Comprehensive

10/9/2021 4:31:46 PM

## Sample Summary

Instrument ID: iCAP Q

Analysis index: 10

Analysis name: 12ti

Analysis started at: 10/9/2021 3:36:38 PM

User name: WINDOWS-UPCI4ER\Administrator

| Category    | Concentration average | Concentration RSD |
|-------------|-----------------------|-------------------|
| 6Li (KED)   | 167.190 %             |                   |
| 9Be (KED)   | 0.000 ppb             |                   |
| 11B (KED)   | -15.797 ppb           |                   |
| 24Mg (KED)  | 636.804 ppb           |                   |
| 27Al (KED)  | 768.006 ppb           |                   |
| 45Sc (KED)  | 168.938 %             |                   |
| 51V (KED)   | 1.338 ppb             |                   |
| 52Cr (KED)  | 2.530 ppb             |                   |
| 55Mn (KED)  | 21.751 ppb            |                   |
| 56Fe (KED)  | 808.622 ppb           |                   |
| 58Ni (KED)  | 3.717 ppb             |                   |
| 59Co (KED)  | 0.361 ppb             |                   |
| 63Cu (KED)  | 9.451 ppb             |                   |
| 64Zn (KED)  | 167.490 ppb           |                   |
| 69Ga (KED)  | 2.180 ppb             |                   |
| 75As (KED)  | 0.315 ppb             |                   |
| 80Se (KED)  | 0.693 ppb             |                   |
| 85Rb (KED)  | 5.203 ppb             |                   |
| 88Sr (KED)  | 9.638 ppb             |                   |
| 89Y (KED)   | 162.589 %             |                   |
| 107Ag (KED) | 0.037 ppb             |                   |
| 114Cd (KED) | 0.057 ppb             |                   |
| 115In (KED) | 150.133 %             |                   |
| 133Cs (KED) | 0.134 ppb             |                   |
| 138Ba (KED) | 8.998 ppb             |                   |
| 139La (KED) | 0.721 ppb             |                   |
| 140Ce (KED) | 1.483 ppb             |                   |
| 141Pr (KED) | 0.177 ppb             |                   |
| 142Nd (KED) | 0.905 ppb             |                   |
| 152Sm (KED) | 0.131 ppb             |                   |
| 153Eu (KED) | 0.026 ppb             |                   |
| 158Gd (KED) | 0.113 ppb             |                   |
| 159Tb (KED) | 168.163 %             |                   |
| 164Dy (KED) | 0.081 ppb             |                   |
| 166Er (KED) | 0.038 ppb             |                   |
| 169Tm (KED) | 0.005 ppb             |                   |
| 174Yb (KED) | 0.030 ppb             |                   |
| 175Lu (KED) | -0.199 ppb            |                   |
| 205Tl (KED) | 0.011 ppb             |                   |
| 208Pb (KED) | 1.013 ppb             |                   |
| 209Bi (KED) | 140.196 %             |                   |
| 232Th (KED) | 0.217 ppb             |                   |
| 238U (KED)  | 0.049 ppb             |                   |

| Category   | Concentration average | Intensity average | Intensity RSD |
|------------|-----------------------|-------------------|---------------|
| 6Li (KED)  | 167.190 %             | 3,617 cps         |               |
| 9Be (KED)  | 0.000 ppb             | 0 cps             |               |
| 11B (KED)  | -15.797 ppb           | 543 cps           |               |
| 24Mg (KED) | 636.804 ppb           | 432,514 cps       |               |
| 27Al (KED) | 768.006 ppb           | 156,520 cps       |               |

# Comprehensive

10/9/2021 4:31:46 PM

| Category    | Concentration average | Intensity average | Intensity RSD |
|-------------|-----------------------|-------------------|---------------|
| 45Sc (KED)  | 168.938 %             | 77,098 cps        |               |
| 51V (KED)   | 1.338 ppb             | 13,334 cps        |               |
| 52Cr (KED)  | 2.530 ppb             | 37,747 cps        |               |
| 55Mn (KED)  | 21.751 ppb            | 182,498 cps       |               |
| 56Fe (KED)  | 808.622 ppb           | 11,208,953 cps    |               |
| 58Ni (KED)  | 3.717 ppb             | 61,963 cps        |               |
| 59Co (KED)  | 0.361 ppb             | 10,091 cps        |               |
| 63Cu (KED)  | 9.451 ppb             | 186,153 cps       |               |
| 64Zn (KED)  | 167.490 ppb           | 897,845 cps       |               |
| 69Ga (KED)  | 2.180 ppb             | 17,946 cps        |               |
| 75As (KED)  | 0.315 ppb             | 567 cps           |               |
| 80Se (KED)  | 0.693 ppb             | 3,194 cps         |               |
| 85Rb (KED)  | 5.203 ppb             | 41,894 cps        |               |
| 88Sr (KED)  | 9.638 ppb             | 115,065 cps       |               |
| 89Y (KED)   | 162.589 %             | 681,568 cps       |               |
| 107Ag (KED) | 0.037 ppb             | 1,790 cps         |               |
| 114Cd (KED) | 0.057 ppb             | 1,090 cps         |               |
| 115In (KED) | 150.133 %             | 1,132,150 cps     |               |
| 133Cs (KED) | 0.134 ppb             | 4,824 cps         |               |
| 138Ba (KED) | 8.998 ppb             | 440,441 cps       |               |
| 139La (KED) | 0.721 ppb             | 68,970 cps        |               |
| 140Ce (KED) | 1.483 ppb             | 180,134 cps       |               |
| 141Pr (KED) | 0.177 ppb             | 23,222 cps        |               |
| 142Nd (KED) | 0.905 ppb             | 46,928 cps        |               |
| 152Sm (KED) | 0.131 ppb             | 6,112 cps         |               |
| 153Eu (KED) | 0.026 ppb             | 2,447 cps         |               |
| 158Gd (KED) | 0.113 ppb             | 6,625 cps         |               |
| 159Tb (KED) | 168.163 %             | 5,352,691 cps     |               |
| 164Dy (KED) | 0.081 ppb             | 5,398 cps         |               |
| 166Er (KED) | 0.038 ppb             | 3,731 cps         |               |
| 169Tm (KED) | 0.005 ppb             | 1,373 cps         |               |
| 174Yb (KED) | 0.030 ppb             | 2,844 cps         |               |
| 175Lu (KED) | -0.199 ppb            | 35,675 cps        |               |
| 205Tl (KED) | 0.011 ppb             | 1,783 cps         |               |
| 208Pb (KED) | 1.013 ppb             | 122,589 cps       |               |
| 209Bi (KED) | 140.196 %             | 3,911,240 cps     |               |
| 232Th (KED) | 0.217 ppb             | 48,196 cps        |               |
| 238U (KED)  | 0.049 ppb             | 12,583 cps        |               |

# Comprehensive

10/9/2021 4:31:46 PM

## Sample Summary

Instrument ID: iCAP Q

Analysis index: 11

Analysis name: 20ti

Analysis started at: 10/9/2021 3:39:27 PM

User name: WINDOWS-UPCI4ER\Administrator

| Category    | Concentration average | Concentration RSD |
|-------------|-----------------------|-------------------|
| 6Li (KED)   | 187.379 %             |                   |
| 9Be (KED)   | 0.018 ppb             |                   |
| 11B (KED)   | -6.056 ppb            |                   |
| 24Mg (KED)  | 947.034 ppb           |                   |
| 27Al (KED)  | 1,143.714 ppb         |                   |
| 45Sc (KED)  | 182.847 %             |                   |
| 51V (KED)   | 2.082 ppb             |                   |
| 52Cr (KED)  | 3.729 ppb             |                   |
| 55Mn (KED)  | 33.766 ppb            |                   |
| 56Fe (KED)  | 1,249.430 ppb         |                   |
| 58Ni (KED)  | 5.585 ppb             |                   |
| 59Co (KED)  | 0.535 ppb             |                   |
| 63Cu (KED)  | 10.050 ppb            |                   |
| 64Zn (KED)  | 188.475 ppb           |                   |
| 69Ga (KED)  | 3.574 ppb             |                   |
| 75As (KED)  | 0.492 ppb             |                   |
| 80Se (KED)  | 0.762 ppb             |                   |
| 85Rb (KED)  | 6.656 ppb             |                   |
| 88Sr (KED)  | 14.895 ppb            |                   |
| 89Y (KED)   | 169.021 %             |                   |
| 107Ag (KED) | 0.068 ppb             |                   |
| 114Cd (KED) | 0.167 ppb             |                   |
| 115In (KED) | 156.640 %             |                   |
| 133Cs (KED) | 0.188 ppb             |                   |
| 138Ba (KED) | 14.707 ppb            |                   |
| 139La (KED) | 1.301 ppb             |                   |
| 140Ce (KED) | 2.645 ppb             |                   |
| 141Pr (KED) | 0.322 ppb             |                   |
| 142Nd (KED) | 1.652 ppb             |                   |
| 152Sm (KED) | 0.224 ppb             |                   |
| 153Eu (KED) | 0.043 ppb             |                   |
| 158Gd (KED) | 0.197 ppb             |                   |
| 159Tb (KED) | 170.556 %             |                   |
| 164Dy (KED) | 0.133 ppb             |                   |
| 166Er (KED) | 0.065 ppb             |                   |
| 169Tm (KED) | 0.008 ppb             |                   |
| 174Yb (KED) | 0.049 ppb             |                   |
| 175Lu (KED) | -0.211 ppb            |                   |
| 205Tl (KED) | 0.015 ppb             |                   |
| 208Pb (KED) | 1.656 ppb             |                   |
| 209Bi (KED) | 141.726 %             |                   |
| 232Th (KED) | 0.375 ppb             |                   |
| 238U (KED)  | 0.067 ppb             |                   |

| Category   | Concentration average | Intensity average | Intensity RSD |
|------------|-----------------------|-------------------|---------------|
| 6Li (KED)  | 187.379 %             | 4,054 cps         |               |
| 9Be (KED)  | 0.018 ppb             | 3 cps             |               |
| 11B (KED)  | -6.056 ppb            | 1,590 cps         |               |
| 24Mg (KED) | 947.034 ppb           | 720,408 cps       |               |
| 27Al (KED) | 1,143.714 ppb         | 252,137 cps       |               |

# Comprehensive

10/9/2021 4:31:46 PM

| Category    | Concentration average | Intensity average | Intensity RSD |
|-------------|-----------------------|-------------------|---------------|
| 45Sc (KED)  | 182.847 %             | 83,445 cps        |               |
| 51V (KED)   | 2.082 ppb             | 22,457 cps        |               |
| 52Cr (KED)  | 3.729 ppb             | 60,041 cps        |               |
| 55Mn (KED)  | 33.766 ppb            | 306,509 cps       |               |
| 56Fe (KED)  | 1,249.430 ppb         | 18,737,168 cps    |               |
| 58Ni (KED)  | 5.585 ppb             | 100,278 cps       |               |
| 59Co (KED)  | 0.535 ppb             | 16,140 cps        |               |
| 63Cu (KED)  | 10.050 ppb            | 205,683 cps       |               |
| 64Zn (KED)  | 188.475 ppb           | 1,049,924 cps     |               |
| 69Ga (KED)  | 3.574 ppb             | 30,517 cps        |               |
| 75As (KED)  | 0.492 ppb             | 907 cps           |               |
| 80Se (KED)  | 0.762 ppb             | 3,360 cps         |               |
| 85Rb (KED)  | 6.656 ppb             | 55,704 cps        |               |
| 88Sr (KED)  | 14.895 ppb            | 184,598 cps       |               |
| 89Y (KED)   | 169.021 %             | 708,530 cps       |               |
| 107Ag (KED) | 0.068 ppb             | 3,417 cps         |               |
| 114Cd (KED) | 0.167 ppb             | 3,224 cps         |               |
| 115In (KED) | 156.640 %             | 1,181,219 cps     |               |
| 133Cs (KED) | 0.188 ppb             | 7,012 cps         |               |
| 138Ba (KED) | 14.707 ppb            | 728,671 cps       |               |
| 139La (KED) | 1.301 ppb             | 125,972 cps       |               |
| 140Ce (KED) | 2.645 ppb             | 325,036 cps       |               |
| 141Pr (KED) | 0.322 ppb             | 42,760 cps        |               |
| 142Nd (KED) | 1.652 ppb             | 86,623 cps        |               |
| 152Sm (KED) | 0.224 ppb             | 10,575 cps        |               |
| 153Eu (KED) | 0.043 ppb             | 4,081 cps         |               |
| 158Gd (KED) | 0.197 ppb             | 11,669 cps        |               |
| 159Tb (KED) | 170.556 %             | 5,428,868 cps     |               |
| 164Dy (KED) | 0.133 ppb             | 8,943 cps         |               |
| 166Er (KED) | 0.065 ppb             | 5,955 cps         |               |
| 169Tm (KED) | 0.008 ppb             | 2,210 cps         |               |
| 174Yb (KED) | 0.049 ppb             | 4,611 cps         |               |
| 175Lu (KED) | -0.211 ppb            | 33,860 cps        |               |
| 205Tl (KED) | 0.015 ppb             | 2,310 cps         |               |
| 208Pb (KED) | 1.656 ppb             | 195,020 cps       |               |
| 209Bi (KED) | 141.726 %             | 3,953,928 cps     |               |
| 232Th (KED) | 0.375 ppb             | 83,710 cps        |               |
| 238U (KED)  | 0.067 ppb             | 17,265 cps        |               |

# Comprehensive

10/9/2021 4:31:46 PM

## Sample Summary

Instrument ID: iCAP Q

Analysis index: 12

Analysis name: 4-2ti

Analysis started at: 10/9/2021 3:42:00 PM

User name: WINDOWS-UPCI4ER\Administrator

| Category    | Concentration average | Concentration RSD |
|-------------|-----------------------|-------------------|
| 6Li (KED)   | 200.634 %             |                   |
| 9Be (KED)   | 0.000 ppb             |                   |
| 11B (KED)   | -15.878 ppb           |                   |
| 24Mg (KED)  | 323.870 ppb           |                   |
| 27Al (KED)  | 357.122 ppb           |                   |
| 45Sc (KED)  | 190.016 %             |                   |
| 51V (KED)   | 0.647 ppb             |                   |
| 52Cr (KED)  | 1.567 ppb             |                   |
| 55Mn (KED)  | 9.385 ppb             |                   |
| 56Fe (KED)  | 367.490 ppb           |                   |
| 58Ni (KED)  | 1.872 ppb             |                   |
| 59Co (KED)  | 0.194 ppb             |                   |
| 63Cu (KED)  | 9.994 ppb             |                   |
| 64Zn (KED)  | 153.461 ppb           |                   |
| 69Ga (KED)  | 1.203 ppb             |                   |
| 75As (KED)  | 0.180 ppb             |                   |
| 80Se (KED)  | 1.126 ppb             |                   |
| 85Rb (KED)  | 5.074 ppb             |                   |
| 88Sr (KED)  | 4.887 ppb             |                   |
| 89Y (KED)   | 177.956 %             |                   |
| 107Ag (KED) | 0.035 ppb             |                   |
| 114Cd (KED) | 0.044 ppb             |                   |
| 115In (KED) | 164.837 %             |                   |
| 133Cs (KED) | 0.063 ppb             |                   |
| 138Ba (KED) | 4.866 ppb             |                   |
| 139La (KED) | 0.315 ppb             |                   |
| 140Ce (KED) | 0.675 ppb             |                   |
| 141Pr (KED) | 0.080 ppb             |                   |
| 142Nd (KED) | 0.422 ppb             |                   |
| 152Sm (KED) | 0.064 ppb             |                   |
| 153Eu (KED) | 0.012 ppb             |                   |
| 158Gd (KED) | 0.051 ppb             |                   |
| 159Tb (KED) | 171.628 %             |                   |
| 164Dy (KED) | 0.038 ppb             |                   |
| 166Er (KED) | 0.019 ppb             |                   |
| 169Tm (KED) | 0.002 ppb             |                   |
| 174Yb (KED) | 0.014 ppb             |                   |
| 175Lu (KED) | -0.218 ppb            |                   |
| 205Tl (KED) | 0.007 ppb             |                   |
| 208Pb (KED) | 0.680 ppb             |                   |
| 209Bi (KED) | 146.109 %             |                   |
| 232Th (KED) | 0.108 ppb             |                   |
| 238U (KED)  | 0.025 ppb             |                   |

| Category   | Concentration average | Intensity average | Intensity RSD |
|------------|-----------------------|-------------------|---------------|
| 6Li (KED)  | 200.634 %             | 4,341 cps         |               |
| 9Be (KED)  | 0.000 ppb             | 0 cps             |               |
| 11B (KED)  | -15.878 ppb           | 643 cps           |               |
| 24Mg (KED) | 323.870 ppb           | 264,497 cps       |               |
| 27Al (KED) | 357.122 ppb           | 82,025 cps        |               |

# Comprehensive

10/9/2021 4:31:46 PM

| Category    | Concentration average | Intensity average | Intensity RSD |
|-------------|-----------------------|-------------------|---------------|
| 45Sc (KED)  | 190.016 %             | 86,717 cps        |               |
| 51V (KED)   | 0.647 ppb             | 7,265 cps         |               |
| 52Cr (KED)  | 1.567 ppb             | 26,445 cps        |               |
| 55Mn (KED)  | 9.385 ppb             | 88,694 cps        |               |
| 56Fe (KED)  | 367.490 ppb           | 5,738,114 cps     |               |
| 58Ni (KED)  | 1.872 ppb             | 35,607 cps        |               |
| 59Co (KED)  | 0.194 ppb             | 6,135 cps         |               |
| 63Cu (KED)  | 9.994 ppb             | 215,354 cps       |               |
| 64Zn (KED)  | 153.461 ppb           | 900,656 cps       |               |
| 69Ga (KED)  | 1.203 ppb             | 10,898 cps        |               |
| 75As (KED)  | 0.180 ppb             | 363 cps           |               |
| 80Se (KED)  | 1.126 ppb             | 3,761 cps         |               |
| 85Rb (KED)  | 5.074 ppb             | 44,723 cps        |               |
| 88Sr (KED)  | 4.887 ppb             | 64,118 cps        |               |
| 89Y (KED)   | 177.956 %             | 745,985 cps       |               |
| 107Ag (KED) | 0.035 ppb             | 1,863 cps         |               |
| 114Cd (KED) | 0.044 ppb             | 943 cps           |               |
| 115In (KED) | 164.837 %             | 1,243,035 cps     |               |
| 133Cs (KED) | 0.063 ppb             | 2,514 cps         |               |
| 138Ba (KED) | 4.866 ppb             | 244,181 cps       |               |
| 139La (KED) | 0.315 ppb             | 30,955 cps        |               |
| 140Ce (KED) | 0.675 ppb             | 84,334 cps        |               |
| 141Pr (KED) | 0.080 ppb             | 10,818 cps        |               |
| 142Nd (KED) | 0.422 ppb             | 22,437 cps        |               |
| 152Sm (KED) | 0.064 ppb             | 3,074 cps         |               |
| 153Eu (KED) | 0.012 ppb             | 1,207 cps         |               |
| 158Gd (KED) | 0.051 ppb             | 3,067 cps         |               |
| 159Tb (KED) | 171.628 %             | 5,462,979 cps     |               |
| 164Dy (KED) | 0.038 ppb             | 2,570 cps         |               |
| 166Er (KED) | 0.019 ppb             | 2,284 cps         |               |
| 169Tm (KED) | 0.002 ppb             | 657 cps           |               |
| 174Yb (KED) | 0.014 ppb             | 1,403 cps         |               |
| 175Lu (KED) | -0.218 ppb            | 32,783 cps        |               |
| 205Tl (KED) | 0.007 ppb             | 1,113 cps         |               |
| 208Pb (KED) | 0.680 ppb             | 89,857 cps        |               |
| 209Bi (KED) | 146.109 %             | 4,076,208 cps     |               |
| 232Th (KED) | 0.108 ppb             | 25,272 cps        |               |
| 238U (KED)  | 0.025 ppb             | 6,738 cps         |               |

# Comprehensive

10/9/2021 4:31:46 PM

## Sample Summary

Instrument ID: iCAP Q

Analysis index: 13

Analysis name: 00077ti

Analysis started at: 10/9/2021 3:44:59 PM

User name: WINDOWS-UPCI4ER\Administrator

| Category    | Concentration average | Concentration RSD |
|-------------|-----------------------|-------------------|
| 6Li (KED)   | 204.179 %             |                   |
| 9Be (KED)   | 0.051 ppb             |                   |
| 11B (KED)   | -12.610 ppb           |                   |
| 24Mg (KED)  | 557.992 ppb           |                   |
| 27Al (KED)  | 548.819 ppb           |                   |
| 45Sc (KED)  | 206.696 %             |                   |
| 51V (KED)   | 0.949 ppb             |                   |
| 52Cr (KED)  | 2.008 ppb             |                   |
| 55Mn (KED)  | 16.390 ppb            |                   |
| 56Fe (KED)  | 540.183 ppb           |                   |
| 58Ni (KED)  | 2.610 ppb             |                   |
| 59Co (KED)  | 0.242 ppb             |                   |
| 63Cu (KED)  | 9.634 ppb             |                   |
| 64Zn (KED)  | 168.120 ppb           |                   |
| 69Ga (KED)  | 1.938 ppb             |                   |
| 75As (KED)  | 0.264 ppb             |                   |
| 80Se (KED)  | 0.833 ppb             |                   |
| 85Rb (KED)  | 7.149 ppb             |                   |
| 88Sr (KED)  | 7.806 ppb             |                   |
| 89Y (KED)   | 185.858 %             |                   |
| 107Ag (KED) | 0.051 ppb             |                   |
| 114Cd (KED) | 0.060 ppb             |                   |
| 115In (KED) | 171.358 %             |                   |
| 133Cs (KED) | 0.094 ppb             |                   |
| 138Ba (KED) | 7.749 ppb             |                   |
| 139La (KED) | 0.557 ppb             |                   |
| 140Ce (KED) | 1.135 ppb             |                   |
| 141Pr (KED) | 0.136 ppb             |                   |
| 142Nd (KED) | 0.705 ppb             |                   |
| 152Sm (KED) | 0.100 ppb             |                   |
| 153Eu (KED) | 0.018 ppb             |                   |
| 158Gd (KED) | 0.086 ppb             |                   |
| 159Tb (KED) | 177.292 %             |                   |
| 164Dy (KED) | 0.062 ppb             |                   |
| 166Er (KED) | 0.025 ppb             |                   |
| 169Tm (KED) | 0.003 ppb             |                   |
| 174Yb (KED) | 0.022 ppb             |                   |
| 175Lu (KED) | -0.221 ppb            |                   |
| 205Tl (KED) | 0.013 ppb             |                   |
| 208Pb (KED) | 0.785 ppb             |                   |
| 209Bi (KED) | 145.101 %             |                   |
| 232Th (KED) | 0.177 ppb             |                   |
| 238U (KED)  | 0.030 ppb             |                   |

| Category   | Concentration average | Intensity average | Intensity RSD |
|------------|-----------------------|-------------------|---------------|
| 6Li (KED)  | 204.179 %             | 4,417 cps         |               |
| 9Be (KED)  | 0.051 ppb             | 10 cps            |               |
| 11B (KED)  | -12.610 ppb           | 1,013 cps         |               |
| 24Mg (KED) | 557.992 ppb           | 462,965 cps       |               |
| 27Al (KED) | 548.819 ppb           | 136,942 cps       |               |

# Comprehensive

10/9/2021 4:31:46 PM

| Category    | Concentration average | Intensity average | Intensity RSD |
|-------------|-----------------------|-------------------|---------------|
| 45Sc (KED)  | 206.696 %             | 94,329 cps        |               |
| 51V (KED)   | 0.949 ppb             | 11,575 cps        |               |
| 52Cr (KED)  | 2.008 ppb             | 36,744 cps        |               |
| 55Mn (KED)  | 16.390 ppb            | 168,314 cps       |               |
| 56Fe (KED)  | 540.183 ppb           | 9,167,043 cps     |               |
| 58Ni (KED)  | 2.610 ppb             | 53,565 cps        |               |
| 59Co (KED)  | 0.242 ppb             | 8,309 cps         |               |
| 63Cu (KED)  | 9.634 ppb             | 216,877 cps       |               |
| 64Zn (KED)  | 168.120 ppb           | 1,030,180 cps     |               |
| 69Ga (KED)  | 1.938 ppb             | 18,257 cps        |               |
| 75As (KED)  | 0.264 ppb             | 547 cps           |               |
| 80Se (KED)  | 0.833 ppb             | 3,741 cps         |               |
| 85Rb (KED)  | 7.149 ppb             | 65,794 cps        |               |
| 88Sr (KED)  | 7.806 ppb             | 106,639 cps       |               |
| 89Y (KED)   | 185.858 %             | 779,107 cps       |               |
| 107Ag (KED) | 0.051 ppb             | 2,800 cps         |               |
| 114Cd (KED) | 0.060 ppb             | 1,313 cps         |               |
| 115In (KED) | 171.358 %             | 1,292,213 cps     |               |
| 133Cs (KED) | 0.094 ppb             | 3,874 cps         |               |
| 138Ba (KED) | 7.749 ppb             | 400,221 cps       |               |
| 139La (KED) | 0.557 ppb             | 56,327 cps        |               |
| 140Ce (KED) | 1.135 ppb             | 145,695 cps       |               |
| 141Pr (KED) | 0.136 ppb             | 18,844 cps        |               |
| 142Nd (KED) | 0.705 ppb             | 38,583 cps        |               |
| 152Sm (KED) | 0.100 ppb             | 4,928 cps         |               |
| 153Eu (KED) | 0.018 ppb             | 1,797 cps         |               |
| 158Gd (KED) | 0.086 ppb             | 5,361 cps         |               |
| 159Tb (KED) | 177.292 %             | 5,643,284 cps     |               |
| 164Dy (KED) | 0.062 ppb             | 4,361 cps         |               |
| 166Er (KED) | 0.025 ppb             | 2,830 cps         |               |
| 169Tm (KED) | 0.003 ppb             | 1,060 cps         |               |
| 174Yb (KED) | 0.022 ppb             | 2,154 cps         |               |
| 175Lu (KED) | -0.221 ppb            | 33,295 cps        |               |
| 205Tl (KED) | 0.013 ppb             | 2,010 cps         |               |
| 208Pb (KED) | 0.785 ppb             | 101,165 cps       |               |
| 209Bi (KED) | 145.101 %             | 4,048,070 cps     |               |
| 232Th (KED) | 0.177 ppb             | 40,750 cps        |               |
| 238U (KED)  | 0.030 ppb             | 8,176 cps         |               |

# Comprehensive

10/9/2021 4:31:46 PM

## Sample Summary

Instrument ID: iCAP Q

Analysis index: 14

Analysis name: 0299ti

Analysis started at: 10/9/2021 3:48:29 PM

User name: WINDOWS-UPCI4ER\Administrator

| Category    | Concentration average | Concentration RSD |
|-------------|-----------------------|-------------------|
| 6Li (KED)   | 203.408 %             |                   |
| 9Be (KED)   | 0.034 ppb             |                   |
| 11B (KED)   | -16.447 ppb           |                   |
| 24Mg (KED)  | 448.083 ppb           |                   |
| 27Al (KED)  | 312.221 ppb           |                   |
| 45Sc (KED)  | 221.948 %             |                   |
| 51V (KED)   | 0.572 ppb             |                   |
| 52Cr (KED)  | 2.985 ppb             |                   |
| 55Mn (KED)  | 9.663 ppb             |                   |
| 56Fe (KED)  | 338.230 ppb           |                   |
| 58Ni (KED)  | 1.986 ppb             |                   |
| 59Co (KED)  | 0.158 ppb             |                   |
| 63Cu (KED)  | 11.042 ppb            |                   |
| 64Zn (KED)  | 170.530 ppb           |                   |
| 69Ga (KED)  | 1.129 ppb             |                   |
| 75As (KED)  | 0.187 ppb             |                   |
| 80Se (KED)  | 0.939 ppb             |                   |
| 85Rb (KED)  | 6.988 ppb             |                   |
| 88Sr (KED)  | 5.298 ppb             |                   |
| 89Y (KED)   | 193.482 %             |                   |
| 107Ag (KED) | 0.055 ppb             |                   |
| 114Cd (KED) | 0.047 ppb             |                   |
| 115In (KED) | 174.048 %             |                   |
| 133Cs (KED) | 0.060 ppb             |                   |
| 138Ba (KED) | 4.700 ppb             |                   |
| 139La (KED) | 0.331 ppb             |                   |
| 140Ce (KED) | 0.698 ppb             |                   |
| 141Pr (KED) | 0.093 ppb             |                   |
| 142Nd (KED) | 0.465 ppb             |                   |
| 152Sm (KED) | 0.058 ppb             |                   |
| 153Eu (KED) | 0.011 ppb             |                   |
| 158Gd (KED) | 0.049 ppb             |                   |
| 159Tb (KED) | 182.830 %             |                   |
| 164Dy (KED) | 0.033 ppb             |                   |
| 166Er (KED) | 0.016 ppb             |                   |
| 169Tm (KED) | 0.002 ppb             |                   |
| 174Yb (KED) | 0.012 ppb             |                   |
| 175Lu (KED) | -0.234 ppb            |                   |
| 205Tl (KED) | 0.010 ppb             |                   |
| 208Pb (KED) | 0.718 ppb             |                   |
| 209Bi (KED) | 145.209 %             |                   |
| 232Th (KED) | 0.098 ppb             |                   |
| 238U (KED)  | 0.025 ppb             |                   |

| Category   | Concentration average | Intensity average | Intensity RSD |
|------------|-----------------------|-------------------|---------------|
| 6Li (KED)  | 203.408 %             | 4,401 cps         |               |
| 9Be (KED)  | 0.034 ppb             | 7 cps             |               |
| 11B (KED)  | -16.447 ppb           | 590 cps           |               |
| 24Mg (KED) | 448.083 ppb           | 370,584 cps       |               |
| 27Al (KED) | 312.221 ppb           | 83,808 cps        |               |

# Comprehensive

10/9/2021 4:31:46 PM

| Category    | Concentration average | Intensity average | Intensity RSD |
|-------------|-----------------------|-------------------|---------------|
| 45Sc (KED)  | 221.948 %             | 101,289 cps       |               |
| 51V (KED)   | 0.572 ppb             | 7,496 cps         |               |
| 52Cr (KED)  | 2.985 ppb             | 58,427 cps        |               |
| 55Mn (KED)  | 9.663 ppb             | 106,662 cps       |               |
| 56Fe (KED)  | 338.230 ppb           | 6,170,163 cps     |               |
| 58Ni (KED)  | 1.986 ppb             | 44,041 cps        |               |
| 59Co (KED)  | 0.158 ppb             | 5,845 cps         |               |
| 63Cu (KED)  | 11.042 ppb            | 258,544 cps       |               |
| 64Zn (KED)  | 170.530 ppb           | 1,087,767 cps     |               |
| 69Ga (KED)  | 1.129 ppb             | 11,132 cps        |               |
| 75As (KED)  | 0.187 ppb             | 410 cps           |               |
| 80Se (KED)  | 0.939 ppb             | 3,964 cps         |               |
| 85Rb (KED)  | 6.988 ppb             | 66,946 cps        |               |
| 88Sr (KED)  | 5.298 ppb             | 75,526 cps        |               |
| 89Y (KED)   | 193.482 %             | 811,066 cps       |               |
| 107Ag (KED) | 0.055 ppb             | 3,100 cps         |               |
| 114Cd (KED) | 0.047 ppb             | 1,047 cps         |               |
| 115In (KED) | 174.048 %             | 1,312,494 cps     |               |
| 133Cs (KED) | 0.060 ppb             | 2,520 cps         |               |
| 138Ba (KED) | 4.700 ppb             | 251,314 cps       |               |
| 139La (KED) | 0.331 ppb             | 34,671 cps        |               |
| 140Ce (KED) | 0.698 ppb             | 92,811 cps        |               |
| 141Pr (KED) | 0.093 ppb             | 13,371 cps        |               |
| 142Nd (KED) | 0.465 ppb             | 26,321 cps        |               |
| 152Sm (KED) | 0.058 ppb             | 2,987 cps         |               |
| 153Eu (KED) | 0.011 ppb             | 1,153 cps         |               |
| 158Gd (KED) | 0.049 ppb             | 3,150 cps         |               |
| 159Tb (KED) | 182.830 %             | 5,819,555 cps     |               |
| 164Dy (KED) | 0.033 ppb             | 2,374 cps         |               |
| 166Er (KED) | 0.016 ppb             | 2,157 cps         |               |
| 169Tm (KED) | 0.002 ppb             | 627 cps           |               |
| 174Yb (KED) | 0.012 ppb             | 1,270 cps         |               |
| 175Lu (KED) | -0.234 ppb            | 31,881 cps        |               |
| 205Tl (KED) | 0.010 ppb             | 1,630 cps         |               |
| 208Pb (KED) | 0.718 ppb             | 93,620 cps        |               |
| 209Bi (KED) | 145.209 %             | 4,051,089 cps     |               |
| 232Th (KED) | 0.098 ppb             | 22,841 cps        |               |
| 238U (KED)  | 0.025 ppb             | 6,929 cps         |               |

# Comprehensive

10/9/2021 4:31:46 PM

## Sample Summary

Instrument ID: iCAP Q

Analysis index: 15

Analysis name: 5ti

Analysis started at: 10/9/2021 3:51:35 PM

User name: WINDOWS-UPCI4ER\Administrator

| Category    | Concentration average | Concentration RSD |
|-------------|-----------------------|-------------------|
| 6Li (KED)   | 230.072 %             |                   |
| 9Be (KED)   | 0.000 ppb             |                   |
| 11B (KED)   | -17.099 ppb           |                   |
| 24Mg (KED)  | 322.950 ppb           |                   |
| 27Al (KED)  | 319.520 ppb           |                   |
| 45Sc (KED)  | 214.144 %             |                   |
| 51V (KED)   | 0.540 ppb             |                   |
| 52Cr (KED)  | 1.898 ppb             |                   |
| 55Mn (KED)  | 8.953 ppb             |                   |
| 56Fe (KED)  | 332.201 ppb           |                   |
| 58Ni (KED)  | 1.650 ppb             |                   |
| 59Co (KED)  | 0.150 ppb             |                   |
| 63Cu (KED)  | 8.930 ppb             |                   |
| 64Zn (KED)  | 167.584 ppb           |                   |
| 69Ga (KED)  | 1.029 ppb             |                   |
| 75As (KED)  | 0.185 ppb             |                   |
| 80Se (KED)  | 0.944 ppb             |                   |
| 85Rb (KED)  | 3.521 ppb             |                   |
| 88Sr (KED)  | 4.625 ppb             |                   |
| 89Y (KED)   | 200.639 %             |                   |
| 107Ag (KED) | 0.042 ppb             |                   |
| 114Cd (KED) | 0.058 ppb             |                   |
| 115In (KED) | 179.365 %             |                   |
| 133Cs (KED) | 0.057 ppb             |                   |
| 138Ba (KED) | 4.510 ppb             |                   |
| 139La (KED) | 0.287 ppb             |                   |
| 140Ce (KED) | 0.599 ppb             |                   |
| 141Pr (KED) | 0.072 ppb             |                   |
| 142Nd (KED) | 0.372 ppb             |                   |
| 152Sm (KED) | 0.050 ppb             |                   |
| 153Eu (KED) | 0.010 ppb             |                   |
| 158Gd (KED) | 0.047 ppb             |                   |
| 159Tb (KED) | 186.857 %             |                   |
| 164Dy (KED) | 0.030 ppb             |                   |
| 166Er (KED) | 0.013 ppb             |                   |
| 169Tm (KED) | 0.002 ppb             |                   |
| 174Yb (KED) | 0.012 ppb             |                   |
| 175Lu (KED) | -0.228 ppb            |                   |
| 205Tl (KED) | 0.006 ppb             |                   |
| 208Pb (KED) | 0.770 ppb             |                   |
| 209Bi (KED) | 151.381 %             |                   |
| 232Th (KED) | 0.086 ppb             |                   |
| 238U (KED)  | 0.024 ppb             |                   |

| Category   | Concentration average | Intensity average | Intensity RSD |
|------------|-----------------------|-------------------|---------------|
| 6Li (KED)  | 230.072 %             | 4,978 cps         |               |
| 9Be (KED)  | 0.000 ppb             | 0 cps             |               |
| 11B (KED)  | -17.099 ppb           | 587 cps           |               |
| 24Mg (KED) | 322.950 ppb           | 302,448 cps       |               |
| 27Al (KED) | 319.520 ppb           | 82,743 cps        |               |

# Comprehensive

10/9/2021 4:31:46 PM

| Category    | Concentration average | Intensity average | Intensity RSD |
|-------------|-----------------------|-------------------|---------------|
| 45Sc (KED)  | 214.144 %             | 97,728 cps        |               |
| 51V (KED)   | 0.540 ppb             | 6,829 cps         |               |
| 52Cr (KED)  | 1.898 ppb             | 36,012 cps        |               |
| 55Mn (KED)  | 8.953 ppb             | 95,370 cps        |               |
| 56Fe (KED)  | 332.201 ppb           | 5,847,428 cps     |               |
| 58Ni (KED)  | 1.650 ppb             | 35,497 cps        |               |
| 59Co (KED)  | 0.150 ppb             | 5,358 cps         |               |
| 63Cu (KED)  | 8.930 ppb             | 217,145 cps       |               |
| 64Zn (KED)  | 167.584 ppb           | 1,108,577 cps     |               |
| 69Ga (KED)  | 1.029 ppb             | 10,524 cps        |               |
| 75As (KED)  | 0.185 ppb             | 420 cps           |               |
| 80Se (KED)  | 0.944 ppb             | 4,114 cps         |               |
| 85Rb (KED)  | 3.521 ppb             | 34,999 cps        |               |
| 88Sr (KED)  | 4.625 ppb             | 68,435 cps        |               |
| 89Y (KED)   | 200.639 %             | 841,069 cps       |               |
| 107Ag (KED) | 0.042 ppb             | 2,437 cps         |               |
| 114Cd (KED) | 0.058 ppb             | 1,330 cps         |               |
| 115In (KED) | 179.365 %             | 1,352,589 cps     |               |
| 133Cs (KED) | 0.057 ppb             | 2,484 cps         |               |
| 138Ba (KED) | 4.510 ppb             | 246,553 cps       |               |
| 139La (KED) | 0.287 ppb             | 30,735 cps        |               |
| 140Ce (KED) | 0.599 ppb             | 81,596 cps        |               |
| 141Pr (KED) | 0.072 ppb             | 10,621 cps        |               |
| 142Nd (KED) | 0.372 ppb             | 21,605 cps        |               |
| 152Sm (KED) | 0.050 ppb             | 2,640 cps         |               |
| 153Eu (KED) | 0.010 ppb             | 1,037 cps         |               |
| 158Gd (KED) | 0.047 ppb             | 3,077 cps         |               |
| 159Tb (KED) | 186.857 %             | 5,947,712 cps     |               |
| 164Dy (KED) | 0.030 ppb             | 2,270 cps         |               |
| 166Er (KED) | 0.013 ppb             | 1,993 cps         |               |
| 169Tm (KED) | 0.002 ppb             | 577 cps           |               |
| 174Yb (KED) | 0.012 ppb             | 1,280 cps         |               |
| 175Lu (KED) | -0.228 ppb            | 33,760 cps        |               |
| 205Tl (KED) | 0.006 ppb             | 1,047 cps         |               |
| 208Pb (KED) | 0.770 ppb             | 103,767 cps       |               |
| 209Bi (KED) | 151.381 %             | 4,223,274 cps     |               |
| 232Th (KED) | 0.086 ppb             | 20,914 cps        |               |
| 238U (KED)  | 0.024 ppb             | 6,759 cps         |               |

# Comprehensive

10/9/2021 4:31:46 PM

## Sample Summary

Instrument ID: iCAP Q

Analysis index: 16

Analysis name: 23ti

Analysis started at: 10/9/2021 3:54:38 PM

User name: WINDOWS-UPCI4ER\Administrator

| Category    | Concentration average | Concentration RSD |
|-------------|-----------------------|-------------------|
| 6Li (KED)   | 230.072 %             |                   |
| 9Be (KED)   | 0.000 ppb             |                   |
| 11B (KED)   | -18.231 ppb           |                   |
| 24Mg (KED)  | 296.144 ppb           |                   |
| 27Al (KED)  | 256.878 ppb           |                   |
| 45Sc (KED)  | 218.429 %             |                   |
| 51V (KED)   | 0.478 ppb             |                   |
| 52Cr (KED)  | 2.091 ppb             |                   |
| 55Mn (KED)  | 7.554 ppb             |                   |
| 56Fe (KED)  | 286.737 ppb           |                   |
| 58Ni (KED)  | 1.450 ppb             |                   |
| 59Co (KED)  | 0.141 ppb             |                   |
| 63Cu (KED)  | 6.604 ppb             |                   |
| 64Zn (KED)  | 168.739 ppb           |                   |
| 69Ga (KED)  | 0.976 ppb             |                   |
| 75As (KED)  | 0.148 ppb             |                   |
| 80Se (KED)  | 0.928 ppb             |                   |
| 85Rb (KED)  | 4.884 ppb             |                   |
| 88Sr (KED)  | 4.259 ppb             |                   |
| 89Y (KED)   | 195.127 %             |                   |
| 107Ag (KED) | 0.076 ppb             |                   |
| 114Cd (KED) | 0.081 ppb             |                   |
| 115In (KED) | 182.267 %             |                   |
| 133Cs (KED) | 0.047 ppb             |                   |
| 138Ba (KED) | 3.824 ppb             |                   |
| 139La (KED) | 0.250 ppb             |                   |
| 140Ce (KED) | 0.504 ppb             |                   |
| 141Pr (KED) | 0.061 ppb             |                   |
| 142Nd (KED) | 0.326 ppb             |                   |
| 152Sm (KED) | 0.044 ppb             |                   |
| 153Eu (KED) | 0.009 ppb             |                   |
| 158Gd (KED) | 0.038 ppb             |                   |
| 159Tb (KED) | 187.054 %             |                   |
| 164Dy (KED) | 0.030 ppb             |                   |
| 166Er (KED) | 0.011 ppb             |                   |
| 169Tm (KED) | 0.001 ppb             |                   |
| 174Yb (KED) | 0.011 ppb             |                   |
| 175Lu (KED) | -0.244 ppb            |                   |
| 205Tl (KED) | 0.005 ppb             |                   |
| 208Pb (KED) | 0.817 ppb             |                   |
| 209Bi (KED) | 154.284 %             |                   |
| 232Th (KED) | 0.072 ppb             |                   |
| 238U (KED)  | 0.021 ppb             |                   |

| Category   | Concentration average | Intensity average | Intensity RSD |
|------------|-----------------------|-------------------|---------------|
| 6Li (KED)  | 230.072 %             | 4,978 cps         |               |
| 9Be (KED)  | 0.000 ppb             | 0 cps             |               |
| 11B (KED)  | -18.231 ppb           | 447 cps           |               |
| 24Mg (KED) | 296.144 ppb           | 277,446 cps       |               |
| 27Al (KED) | 256.878 ppb           | 67,921 cps        |               |

# Comprehensive

10/9/2021 4:31:46 PM

| Category    | Concentration average | Intensity average | Intensity RSD |
|-------------|-----------------------|-------------------|---------------|
| 45Sc (KED)  | 218.429 %             | 99,684 cps        |               |
| 51V (KED)   | 0.478 ppb             | 6,172 cps         |               |
| 52Cr (KED)  | 2.091 ppb             | 40,412 cps        |               |
| 55Mn (KED)  | 7.554 ppb             | 82,120 cps        |               |
| 56Fe (KED)  | 286.737 ppb           | 5,150,597 cps     |               |
| 58Ni (KED)  | 1.450 ppb             | 31,964 cps        |               |
| 59Co (KED)  | 0.141 ppb             | 5,161 cps         |               |
| 63Cu (KED)  | 6.604 ppb             | 156,576 cps       |               |
| 64Zn (KED)  | 168.739 ppb           | 1,085,529 cps     |               |
| 69Ga (KED)  | 0.976 ppb             | 9,717 cps         |               |
| 75As (KED)  | 0.148 ppb             | 333 cps           |               |
| 80Se (KED)  | 0.928 ppb             | 3,991 cps         |               |
| 85Rb (KED)  | 4.884 ppb             | 47,200 cps        |               |
| 88Sr (KED)  | 4.259 ppb             | 61,341 cps        |               |
| 89Y (KED)   | 195.127 %             | 817,965 cps       |               |
| 107Ag (KED) | 0.076 ppb             | 4,464 cps         |               |
| 114Cd (KED) | 0.081 ppb             | 1,853 cps         |               |
| 115In (KED) | 182.267 %             | 1,374,475 cps     |               |
| 133Cs (KED) | 0.047 ppb             | 2,100 cps         |               |
| 138Ba (KED) | 3.824 ppb             | 209,653 cps       |               |
| 139La (KED) | 0.250 ppb             | 26,869 cps        |               |
| 140Ce (KED) | 0.504 ppb             | 68,927 cps        |               |
| 141Pr (KED) | 0.061 ppb             | 9,003 cps         |               |
| 142Nd (KED) | 0.326 ppb             | 18,948 cps        |               |
| 152Sm (KED) | 0.044 ppb             | 2,327 cps         |               |
| 153Eu (KED) | 0.009 ppb             | 1,020 cps         |               |
| 158Gd (KED) | 0.038 ppb             | 2,550 cps         |               |
| 159Tb (KED) | 187.054 %             | 5,953,986 cps     |               |
| 164Dy (KED) | 0.030 ppb             | 2,237 cps         |               |
| 166Er (KED) | 0.011 ppb             | 1,740 cps         |               |
| 169Tm (KED) | 0.001 ppb             | 507 cps           |               |
| 174Yb (KED) | 0.011 ppb             | 1,203 cps         |               |
| 175Lu (KED) | -0.244 ppb            | 30,621 cps        |               |
| 205Tl (KED) | 0.005 ppb             | 843 cps           |               |
| 208Pb (KED) | 0.817 ppb             | 111,406 cps       |               |
| 209Bi (KED) | 154.284 %             | 4,304,264 cps     |               |
| 232Th (KED) | 0.072 ppb             | 17,869 cps        |               |
| 238U (KED)  | 0.021 ppb             | 6,185 cps         |               |

# Comprehensive

10/9/2021 4:31:46 PM

## Sample Summary

Instrument ID: iCAP Q

Analysis index: 17

Analysis name: 00061ti

Analysis started at: 10/9/2021 3:57:44 PM

User name: WINDOWS-UPCI4ER\Administrator

| Category    | Concentration average | Concentration RSD |
|-------------|-----------------------|-------------------|
| 6Li (KED)   | 231.614 %             |                   |
| 9Be (KED)   | 0.059 ppb             |                   |
| 11B (KED)   | -14.534 ppb           |                   |
| 24Mg (KED)  | 519.403 ppb           |                   |
| 27Al (KED)  | 570.196 ppb           |                   |
| 45Sc (KED)  | 225.837 %             |                   |
| 51V (KED)   | 0.981 ppb             |                   |
| 52Cr (KED)  | 2.692 ppb             |                   |
| 55Mn (KED)  | 16.264 ppb            |                   |
| 56Fe (KED)  | 568.857 ppb           |                   |
| 58Ni (KED)  | 2.742 ppb             |                   |
| 59Co (KED)  | 0.271 ppb             |                   |
| 63Cu (KED)  | 8.043 ppb             |                   |
| 64Zn (KED)  | 182.677 ppb           |                   |
| 69Ga (KED)  | 1.808 ppb             |                   |
| 75As (KED)  | 0.265 ppb             |                   |
| 80Se (KED)  | 0.516 ppb             |                   |
| 85Rb (KED)  | 4.853 ppb             |                   |
| 88Sr (KED)  | 7.809 ppb             |                   |
| 89Y (KED)   | 199.991 %             |                   |
| 107Ag (KED) | 0.095 ppb             |                   |
| 114Cd (KED) | 0.046 ppb             |                   |
| 115In (KED) | 183.661 %             |                   |
| 133Cs (KED) | 0.099 ppb             |                   |
| 138Ba (KED) | 7.531 ppb             |                   |
| 139La (KED) | 0.544 ppb             |                   |
| 140Ce (KED) | 1.149 ppb             |                   |
| 141Pr (KED) | 0.136 ppb             |                   |
| 142Nd (KED) | 0.720 ppb             |                   |
| 152Sm (KED) | 0.104 ppb             |                   |
| 153Eu (KED) | 0.019 ppb             |                   |
| 158Gd (KED) | 0.081 ppb             |                   |
| 159Tb (KED) | 192.373 %             |                   |
| 164Dy (KED) | 0.061 ppb             |                   |
| 166Er (KED) | 0.027 ppb             |                   |
| 169Tm (KED) | 0.003 ppb             |                   |
| 174Yb (KED) | 0.023 ppb             |                   |
| 175Lu (KED) | -0.242 ppb            |                   |
| 205Tl (KED) | 0.012 ppb             |                   |
| 208Pb (KED) | 0.975 ppb             |                   |
| 209Bi (KED) | 156.715 %             |                   |
| 232Th (KED) | 0.164 ppb             |                   |
| 238U (KED)  | 0.032 ppb             |                   |

| Category   | Concentration average | Intensity average | Intensity RSD |
|------------|-----------------------|-------------------|---------------|
| 6Li (KED)  | 231.614 %             | 5,011 cps         |               |
| 9Be (KED)  | 0.059 ppb             | 13 cps            |               |
| 11B (KED)  | -14.534 ppb           | 910 cps           |               |
| 24Mg (KED) | 519.403 ppb           | 488,939 cps       |               |
| 27Al (KED) | 570.196 ppb           | 155,438 cps       |               |

# Comprehensive

10/9/2021 4:31:46 PM

| Category    | Concentration average | Intensity average | Intensity RSD |
|-------------|-----------------------|-------------------|---------------|
| 45Sc (KED)  | 225.837 %             | 103,064 cps       |               |
| 51V (KED)   | 0.981 ppb             | 13,074 cps        |               |
| 52Cr (KED)  | 2.692 ppb             | 53,658 cps        |               |
| 55Mn (KED)  | 16.264 ppb            | 182,486 cps       |               |
| 56Fe (KED)  | 568.857 ppb           | 10,546,675 cps    |               |
| 58Ni (KED)  | 2.742 ppb             | 61,428 cps        |               |
| 59Co (KED)  | 0.271 ppb             | 10,121 cps        |               |
| 63Cu (KED)  | 8.043 ppb             | 195,105 cps       |               |
| 64Zn (KED)  | 182.677 ppb           | 1,204,191 cps     |               |
| 69Ga (KED)  | 1.808 ppb             | 18,330 cps        |               |
| 75As (KED)  | 0.265 ppb             | 590 cps           |               |
| 80Se (KED)  | 0.516 ppb             | 3,807 cps         |               |
| 85Rb (KED)  | 4.853 ppb             | 48,076 cps        |               |
| 88Sr (KED)  | 7.809 ppb             | 114,787 cps       |               |
| 89Y (KED)   | 199.991 %             | 838,353 cps       |               |
| 107Ag (KED) | 0.095 ppb             | 5,581 cps         |               |
| 114Cd (KED) | 0.046 ppb             | 1,090 cps         |               |
| 115In (KED) | 183.661 %             | 1,384,985 cps     |               |
| 133Cs (KED) | 0.099 ppb             | 4,374 cps         |               |
| 138Ba (KED) | 7.531 ppb             | 422,127 cps       |               |
| 139La (KED) | 0.544 ppb             | 59,656 cps        |               |
| 140Ce (KED) | 1.149 ppb             | 159,952 cps       |               |
| 141Pr (KED) | 0.136 ppb             | 20,520 cps        |               |
| 142Nd (KED) | 0.720 ppb             | 42,750 cps        |               |
| 152Sm (KED) | 0.104 ppb             | 5,545 cps         |               |
| 153Eu (KED) | 0.019 ppb             | 2,090 cps         |               |
| 158Gd (KED) | 0.081 ppb             | 5,455 cps         |               |
| 159Tb (KED) | 192.373 %             | 6,123,312 cps     |               |
| 164Dy (KED) | 0.061 ppb             | 4,651 cps         |               |
| 166Er (KED) | 0.027 ppb             | 3,247 cps         |               |
| 169Tm (KED) | 0.003 ppb             | 1,097 cps         |               |
| 174Yb (KED) | 0.023 ppb             | 2,507 cps         |               |
| 175Lu (KED) | -0.242 ppb            | 31,884 cps        |               |
| 205Tl (KED) | 0.012 ppb             | 2,137 cps         |               |
| 208Pb (KED) | 0.975 ppb             | 132,393 cps       |               |
| 209Bi (KED) | 156.715 %             | 4,372,095 cps     |               |
| 232Th (KED) | 0.164 ppb             | 40,780 cps        |               |
| 238U (KED)  | 0.032 ppb             | 9,380 cps         |               |

# Comprehensive

10/9/2021 4:31:46 PM

## Sample Summary

Instrument ID: iCAP Q

Analysis index: 18

Analysis name: 00099ti

Analysis started at: 10/9/2021 4:00:25 PM

User name: WINDOWS-UPCI4ER\Administrator

| Category    | Concentration average | Concentration RSD |
|-------------|-----------------------|-------------------|
| 6Li (KED)   | 227.452 %             |                   |
| 9Be (KED)   | 0.045 ppb             |                   |
| 11B (KED)   | -15.245 ppb           |                   |
| 24Mg (KED)  | 924.889 ppb           |                   |
| 27Al (KED)  | 711.309 ppb           |                   |
| 45Sc (KED)  | 240.424 %             |                   |
| 51V (KED)   | 1.223 ppb             |                   |
| 52Cr (KED)  | 2.390 ppb             |                   |
| 55Mn (KED)  | 23.072 ppb            |                   |
| 56Fe (KED)  | 708.542 ppb           |                   |
| 58Ni (KED)  | 3.162 ppb             |                   |
| 59Co (KED)  | 0.318 ppb             |                   |
| 63Cu (KED)  | 10.424 ppb            |                   |
| 64Zn (KED)  | 165.996 ppb           |                   |
| 69Ga (KED)  | 2.385 ppb             |                   |
| 75As (KED)  | 0.353 ppb             |                   |
| 80Se (KED)  | 0.913 ppb             |                   |
| 85Rb (KED)  | 9.776 ppb             |                   |
| 88Sr (KED)  | 11.369 ppb            |                   |
| 89Y (KED)   | 208.195 %             |                   |
| 107Ag (KED) | 0.029 ppb             |                   |
| 114Cd (KED) | 0.056 ppb             |                   |
| 115In (KED) | 183.810 %             |                   |
| 133Cs (KED) | 0.122 ppb             |                   |
| 138Ba (KED) | 9.810 ppb             |                   |
| 139La (KED) | 0.867 ppb             |                   |
| 140Ce (KED) | 1.798 ppb             |                   |
| 141Pr (KED) | 0.215 ppb             |                   |
| 142Nd (KED) | 1.161 ppb             |                   |
| 152Sm (KED) | 0.150 ppb             |                   |
| 153Eu (KED) | 0.026 ppb             |                   |
| 158Gd (KED) | 0.122 ppb             |                   |
| 159Tb (KED) | 197.403 %             |                   |
| 164Dy (KED) | 0.085 ppb             |                   |
| 166Er (KED) | 0.032 ppb             |                   |
| 169Tm (KED) | 0.005 ppb             |                   |
| 174Yb (KED) | 0.029 ppb             |                   |
| 175Lu (KED) | -0.238 ppb            |                   |
| 205Tl (KED) | 0.014 ppb             |                   |
| 208Pb (KED) | 0.909 ppb             |                   |
| 209Bi (KED) | 154.243 %             |                   |
| 232Th (KED) | 0.280 ppb             |                   |
| 238U (KED)  | 0.040 ppb             |                   |

| Category   | Concentration average | Intensity average | Intensity RSD |
|------------|-----------------------|-------------------|---------------|
| 6Li (KED)  | 227.452 %             | 4,921 cps         |               |
| 9Be (KED)  | 0.045 ppb             | 10 cps            |               |
| 11B (KED)  | -15.245 ppb           | 807 cps           |               |
| 24Mg (KED) | 924.889 ppb           | 854,053 cps       |               |
| 27Al (KED) | 711.309 ppb           | 206,335 cps       |               |

# Comprehensive

10/9/2021 4:31:46 PM

| Category    | Concentration average | Intensity average | Intensity RSD |
|-------------|-----------------------|-------------------|---------------|
| 45Sc (KED)  | 240.424 %             | 109,721 cps       |               |
| 51V (KED)   | 1.223 ppb             | 17,349 cps        |               |
| 52Cr (KED)  | 2.390 ppb             | 50,773 cps        |               |
| 55Mn (KED)  | 23.072 ppb            | 275,479 cps       |               |
| 56Fe (KED)  | 708.542 ppb           | 13,980,116 cps    |               |
| 58Ni (KED)  | 3.162 ppb             | 75,210 cps        |               |
| 59Co (KED)  | 0.318 ppb             | 12,646 cps        |               |
| 63Cu (KED)  | 10.424 ppb            | 262,736 cps       |               |
| 64Zn (KED)  | 165.996 ppb           | 1,139,463 cps     |               |
| 69Ga (KED)  | 2.385 ppb             | 25,135 cps        |               |
| 75As (KED)  | 0.353 ppb             | 810 cps           |               |
| 80Se (KED)  | 0.913 ppb             | 4,247 cps         |               |
| 85Rb (KED)  | 9.776 ppb             | 100,766 cps       |               |
| 88Sr (KED)  | 11.369 ppb            | 173,703 cps       |               |
| 89Y (KED)   | 208.195 %             | 872,745 cps       |               |
| 107Ag (KED) | 0.029 ppb             | 1,707 cps         |               |
| 114Cd (KED) | 0.056 ppb             | 1,307 cps         |               |
| 115In (KED) | 183.810 %             | 1,386,109 cps     |               |
| 133Cs (KED) | 0.122 ppb             | 5,378 cps         |               |
| 138Ba (KED) | 9.810 ppb             | 563,425 cps       |               |
| 139La (KED) | 0.867 ppb             | 97,278 cps        |               |
| 140Ce (KED) | 1.798 ppb             | 256,155 cps       |               |
| 141Pr (KED) | 0.215 ppb             | 33,064 cps        |               |
| 142Nd (KED) | 1.161 ppb             | 70,546 cps        |               |
| 152Sm (KED) | 0.150 ppb             | 8,223 cps         |               |
| 153Eu (KED) | 0.026 ppb             | 2,917 cps         |               |
| 158Gd (KED) | 0.122 ppb             | 8,420 cps         |               |
| 159Tb (KED) | 197.403 %             | 6,283,396 cps     |               |
| 164Dy (KED) | 0.085 ppb             | 6,625 cps         |               |
| 166Er (KED) | 0.032 ppb             | 3,834 cps         |               |
| 169Tm (KED) | 0.005 ppb             | 1,570 cps         |               |
| 174Yb (KED) | 0.029 ppb             | 3,187 cps         |               |
| 175Lu (KED) | -0.238 ppb            | 33,536 cps        |               |
| 205Tl (KED) | 0.014 ppb             | 2,427 cps         |               |
| 208Pb (KED) | 0.909 ppb             | 122,432 cps       |               |
| 209Bi (KED) | 154.243 %             | 4,303,109 cps     |               |
| 232Th (KED) | 0.280 ppb             | 68,089 cps        |               |
| 238U (KED)  | 0.040 ppb             | 11,355 cps        |               |

# Comprehensive

10/9/2021 4:31:46 PM

## Sample Summary

Instrument ID: iCAP Q

Analysis index: 19

Analysis name: 00074ti

Analysis started at: 10/9/2021 4:03:10 PM

User name: WINDOWS-UPCI4ER\Administrator

| Category    | Concentration average | Concentration RSD |
|-------------|-----------------------|-------------------|
| 6Li (KED)   | 236.546 %             |                   |
| 9Be (KED)   | 0.044 ppb             |                   |
| 11B (KED)   | -11.671 ppb           |                   |
| 24Mg (KED)  | 453.464 ppb           |                   |
| 27Al (KED)  | 429.837 ppb           |                   |
| 45Sc (KED)  | 244.360 %             |                   |
| 51V (KED)   | 0.710 ppb             |                   |
| 52Cr (KED)  | 1.641 ppb             |                   |
| 55Mn (KED)  | 11.598 ppb            |                   |
| 56Fe (KED)  | 426.297 ppb           |                   |
| 58Ni (KED)  | 2.005 ppb             |                   |
| 59Co (KED)  | 0.194 ppb             |                   |
| 63Cu (KED)  | 8.810 ppb             |                   |
| 64Zn (KED)  | 163.314 ppb           |                   |
| 69Ga (KED)  | 1.565 ppb             |                   |
| 75As (KED)  | 0.213 ppb             |                   |
| 80Se (KED)  | 1.533 ppb             |                   |
| 85Rb (KED)  | 8.074 ppb             |                   |
| 88Sr (KED)  | 6.068 ppb             |                   |
| 89Y (KED)   | 206.130 %             |                   |
| 107Ag (KED) | 0.047 ppb             |                   |
| 114Cd (KED) | 0.055 ppb             |                   |
| 115In (KED) | 190.050 %             |                   |
| 133Cs (KED) | 0.075 ppb             |                   |
| 138Ba (KED) | 5.882 ppb             |                   |
| 139La (KED) | 0.444 ppb             |                   |
| 140Ce (KED) | 0.885 ppb             |                   |
| 141Pr (KED) | 0.107 ppb             |                   |
| 142Nd (KED) | 0.564 ppb             |                   |
| 152Sm (KED) | 0.073 ppb             |                   |
| 153Eu (KED) | 0.014 ppb             |                   |
| 158Gd (KED) | 0.064 ppb             |                   |
| 159Tb (KED) | 199.162 %             |                   |
| 164Dy (KED) | 0.046 ppb             |                   |
| 166Er (KED) | 0.018 ppb             |                   |
| 169Tm (KED) | 0.002 ppb             |                   |
| 174Yb (KED) | 0.018 ppb             |                   |
| 175Lu (KED) | -0.251 ppb            |                   |
| 205Tl (KED) | 0.011 ppb             |                   |
| 208Pb (KED) | 0.752 ppb             |                   |
| 209Bi (KED) | 157.114 %             |                   |
| 232Th (KED) | 0.125 ppb             |                   |
| 238U (KED)  | 0.024 ppb             |                   |

| Category   | Concentration average | Intensity average | Intensity RSD |
|------------|-----------------------|-------------------|---------------|
| 6Li (KED)  | 236.546 %             | 5,118 cps         |               |
| 9Be (KED)  | 0.044 ppb             | 10 cps            |               |
| 11B (KED)  | -11.671 ppb           | 1,293 cps         |               |
| 24Mg (KED) | 453.464 ppb           | 436,117 cps       |               |
| 27Al (KED) | 429.837 ppb           | 126,882 cps       |               |

# Comprehensive

10/9/2021 4:31:46 PM

| Category    | Concentration average | Intensity average | Intensity RSD |
|-------------|-----------------------|-------------------|---------------|
| 45Sc (KED)  | 244.360 %             | 111,517 cps       |               |
| 51V (KED)   | 0.710 ppb             | 10,238 cps        |               |
| 52Cr (KED)  | 1.641 ppb             | 35,594 cps        |               |
| 55Mn (KED)  | 11.598 ppb            | 140,894 cps       |               |
| 56Fe (KED)  | 426.297 ppb           | 8,556,820 cps     |               |
| 58Ni (KED)  | 2.005 ppb             | 48,956 cps        |               |
| 59Co (KED)  | 0.194 ppb             | 7,869 cps         |               |
| 63Cu (KED)  | 8.810 ppb             | 220,118 cps       |               |
| 64Zn (KED)  | 163.314 ppb           | 1,109,993 cps     |               |
| 69Ga (KED)  | 1.565 ppb             | 16,374 cps        |               |
| 75As (KED)  | 0.213 ppb             | 493 cps           |               |
| 80Se (KED)  | 1.533 ppb             | 4,644 cps         |               |
| 85Rb (KED)  | 8.074 ppb             | 82,406 cps        |               |
| 88Sr (KED)  | 6.068 ppb             | 92,070 cps        |               |
| 89Y (KED)   | 206.130 %             | 864,089 cps       |               |
| 107Ag (KED) | 0.047 ppb             | 2,860 cps         |               |
| 114Cd (KED) | 0.055 ppb             | 1,347 cps         |               |
| 115In (KED) | 190.050 %             | 1,433,169 cps     |               |
| 133Cs (KED) | 0.075 ppb             | 3,440 cps         |               |
| 138Ba (KED) | 5.882 ppb             | 341,928 cps       |               |
| 139La (KED) | 0.444 ppb             | 50,469 cps        |               |
| 140Ce (KED) | 0.885 ppb             | 127,848 cps       |               |
| 141Pr (KED) | 0.107 ppb             | 16,711 cps        |               |
| 142Nd (KED) | 0.564 ppb             | 34,722 cps        |               |
| 152Sm (KED) | 0.073 ppb             | 4,064 cps         |               |
| 153Eu (KED) | 0.014 ppb             | 1,610 cps         |               |
| 158Gd (KED) | 0.064 ppb             | 4,511 cps         |               |
| 159Tb (KED) | 199.162 %             | 6,339,408 cps     |               |
| 164Dy (KED) | 0.046 ppb             | 3,624 cps         |               |
| 166Er (KED) | 0.018 ppb             | 2,580 cps         |               |
| 169Tm (KED) | 0.002 ppb             | 870 cps           |               |
| 174Yb (KED) | 0.018 ppb             | 2,040 cps         |               |
| 175Lu (KED) | -0.251 ppb            | 31,072 cps        |               |
| 205Tl (KED) | 0.011 ppb             | 1,880 cps         |               |
| 208Pb (KED) | 0.752 ppb             | 105,469 cps       |               |
| 209Bi (KED) | 157.114 %             | 4,383,211 cps     |               |
| 232Th (KED) | 0.125 ppb             | 31,293 cps        |               |
| 238U (KED)  | 0.024 ppb             | 7,149 cps         |               |

# Comprehensive

10/9/2021 4:31:46 PM

## Sample Summary

Instrument ID: iCAP Q

Analysis index: 20

Analysis name: 00078ti

Analysis started at: 10/9/2021 4:06:06 PM

User name: WINDOWS-UPCI4ER\Administrator

| Category    | Concentration average | Concentration RSD |
|-------------|-----------------------|-------------------|
| 6Li (KED)   | 244.253 %             |                   |
| 9Be (KED)   | 0.014 ppb             |                   |
| 11B (KED)   | -15.369 ppb           |                   |
| 24Mg (KED)  | 730.466 ppb           |                   |
| 27Al (KED)  | 481.227 ppb           |                   |
| 45Sc (KED)  | 247.610 %             |                   |
| 51V (KED)   | 0.840 ppb             |                   |
| 52Cr (KED)  | 1.971 ppb             |                   |
| 55Mn (KED)  | 15.471 ppb            |                   |
| 56Fe (KED)  | 475.299 ppb           |                   |
| 58Ni (KED)  | 2.228 ppb             |                   |
| 59Co (KED)  | 0.231 ppb             |                   |
| 63Cu (KED)  | 8.047 ppb             |                   |
| 64Zn (KED)  | 228.106 ppb           |                   |
| 69Ga (KED)  | 1.719 ppb             |                   |
| 75As (KED)  | 0.248 ppb             |                   |
| 80Se (KED)  | 1.583 ppb             |                   |
| 85Rb (KED)  | 9.357 ppb             |                   |
| 88Sr (KED)  | 7.877 ppb             |                   |
| 89Y (KED)   | 211.028 %             |                   |
| 107Ag (KED) | 0.031 ppb             |                   |
| 114Cd (KED) | 0.049 ppb             |                   |
| 115In (KED) | 192.367 %             |                   |
| 133Cs (KED) | 0.087 ppb             |                   |
| 138Ba (KED) | 6.871 ppb             |                   |
| 139La (KED) | 0.471 ppb             |                   |
| 140Ce (KED) | 0.983 ppb             |                   |
| 141Pr (KED) | 0.118 ppb             |                   |
| 142Nd (KED) | 0.615 ppb             |                   |
| 152Sm (KED) | 0.085 ppb             |                   |
| 153Eu (KED) | 0.016 ppb             |                   |
| 158Gd (KED) | 0.071 ppb             |                   |
| 159Tb (KED) | 197.531 %             |                   |
| 164Dy (KED) | 0.048 ppb             |                   |
| 166Er (KED) | 0.018 ppb             |                   |
| 169Tm (KED) | 0.003 ppb             |                   |
| 174Yb (KED) | 0.020 ppb             |                   |
| 175Lu (KED) | -0.239 ppb            |                   |
| 205Tl (KED) | 0.014 ppb             |                   |
| 208Pb (KED) | 0.820 ppb             |                   |
| 209Bi (KED) | 154.255 %             |                   |
| 232Th (KED) | 0.140 ppb             |                   |
| 238U (KED)  | 0.028 ppb             |                   |

| Category   | Concentration average | Intensity average | Intensity RSD |
|------------|-----------------------|-------------------|---------------|
| 6Li (KED)  | 244.253 %             | 5,284 cps         |               |
| 9Be (KED)  | 0.014 ppb             | 3 cps             |               |
| 11B (KED)  | -15.369 ppb           | 850 cps           |               |
| 24Mg (KED) | 730.466 ppb           | 724,618 cps       |               |
| 27Al (KED) | 481.227 ppb           | 143,894 cps       |               |

# Comprehensive

10/9/2021 4:31:46 PM

| Category    | Concentration average | Intensity average | Intensity RSD |
|-------------|-----------------------|-------------------|---------------|
| 45Sc (KED)  | 247.610 %             | 113,001 cps       |               |
| 51V (KED)   | 0.840 ppb             | 12,273 cps        |               |
| 52Cr (KED)  | 1.971 ppb             | 43,205 cps        |               |
| 55Mn (KED)  | 15.471 ppb            | 190,341 cps       |               |
| 56Fe (KED)  | 475.299 ppb           | 9,664,978 cps     |               |
| 58Ni (KED)  | 2.228 ppb             | 54,968 cps        |               |
| 59Co (KED)  | 0.231 ppb             | 9,480 cps         |               |
| 63Cu (KED)  | 8.047 ppb             | 205,973 cps       |               |
| 64Zn (KED)  | 228.106 ppb           | 1,585,704 cps     |               |
| 69Ga (KED)  | 1.719 ppb             | 18,400 cps        |               |
| 75As (KED)  | 0.248 ppb             | 583 cps           |               |
| 80Se (KED)  | 1.583 ppb             | 4,791 cps         |               |
| 85Rb (KED)  | 9.357 ppb             | 97,757 cps        |               |
| 88Sr (KED)  | 7.877 ppb             | 122,165 cps       |               |
| 89Y (KED)   | 211.028 %             | 884,622 cps       |               |
| 107Ag (KED) | 0.031 ppb             | 1,910 cps         |               |
| 114Cd (KED) | 0.049 ppb             | 1,220 cps         |               |
| 115In (KED) | 192.367 %             | 1,450,642 cps     |               |
| 133Cs (KED) | 0.087 ppb             | 4,027 cps         |               |
| 138Ba (KED) | 6.871 ppb             | 395,704 cps       |               |
| 139La (KED) | 0.471 ppb             | 53,096 cps        |               |
| 140Ce (KED) | 0.983 ppb             | 140,656 cps       |               |
| 141Pr (KED) | 0.118 ppb             | 18,240 cps        |               |
| 142Nd (KED) | 0.615 ppb             | 37,527 cps        |               |
| 152Sm (KED) | 0.085 ppb             | 4,678 cps         |               |
| 153Eu (KED) | 0.016 ppb             | 1,743 cps         |               |
| 158Gd (KED) | 0.071 ppb             | 4,954 cps         |               |
| 159Tb (KED) | 197.531 %             | 6,287,485 cps     |               |
| 164Dy (KED) | 0.048 ppb             | 3,797 cps         |               |
| 166Er (KED) | 0.018 ppb             | 2,570 cps         |               |
| 169Tm (KED) | 0.003 ppb             | 903 cps           |               |
| 174Yb (KED) | 0.020 ppb             | 2,267 cps         |               |
| 175Lu (KED) | -0.239 ppb            | 33,412 cps        |               |
| 205Tl (KED) | 0.014 ppb             | 2,444 cps         |               |
| 208Pb (KED) | 0.820 ppb             | 111,795 cps       |               |
| 209Bi (KED) | 154.255 %             | 4,303,443 cps     |               |
| 232Th (KED) | 0.140 ppb             | 34,394 cps        |               |
| 238U (KED)  | 0.028 ppb             | 8,019 cps         |               |

# Comprehensive

10/9/2021 4:31:46 PM

## Sample Summary

Instrument ID: iCAP Q

Analysis index: 21

Analysis name: 25ti

Analysis started at: 10/9/2021 4:08:57 PM

User name: WINDOWS-UPCI4ER\Administrator

| Category    | Concentration average | Concentration RSD |
|-------------|-----------------------|-------------------|
| 6Li (KED)   | 236.546 %             |                   |
| 9Be (KED)   | 0.029 ppb             |                   |
| 11B (KED)   | -13.611 ppb           |                   |
| 24Mg (KED)  | 881.415 ppb           |                   |
| 27Al (KED)  | 981.341 ppb           |                   |
| 45Sc (KED)  | 246.727 %             |                   |
| 51V (KED)   | 1.707 ppb             |                   |
| 52Cr (KED)  | 2.334 ppb             |                   |
| 55Mn (KED)  | 28.699 ppb            |                   |
| 56Fe (KED)  | 1,005.006 ppb         |                   |
| 58Ni (KED)  | 4.248 ppb             |                   |
| 59Co (KED)  | 0.444 ppb             |                   |
| 63Cu (KED)  | 10.165 ppb            |                   |
| 64Zn (KED)  | 149.114 ppb           |                   |
| 69Ga (KED)  | 2.926 ppb             |                   |
| 75As (KED)  | 0.416 ppb             |                   |
| 80Se (KED)  | 1.531 ppb             |                   |
| 85Rb (KED)  | 5.038 ppb             |                   |
| 88Sr (KED)  | 11.979 ppb            |                   |
| 89Y (KED)   | 221.292 %             |                   |
| 107Ag (KED) | 0.026 ppb             |                   |
| 114Cd (KED) | 0.061 ppb             |                   |
| 115In (KED) | 193.374 %             |                   |
| 133Cs (KED) | 0.172 ppb             |                   |
| 138Ba (KED) | 12.270 ppb            |                   |
| 139La (KED) | 1.014 ppb             |                   |
| 140Ce (KED) | 2.128 ppb             |                   |
| 141Pr (KED) | 0.247 ppb             |                   |
| 142Nd (KED) | 1.326 ppb             |                   |
| 152Sm (KED) | 0.186 ppb             |                   |
| 153Eu (KED) | 0.035 ppb             |                   |
| 158Gd (KED) | 0.157 ppb             |                   |
| 159Tb (KED) | 200.449 %             |                   |
| 164Dy (KED) | 0.107 ppb             |                   |
| 166Er (KED) | 0.047 ppb             |                   |
| 169Tm (KED) | 0.006 ppb             |                   |
| 174Yb (KED) | 0.040 ppb             |                   |
| 175Lu (KED) | -0.248 ppb            |                   |
| 205Tl (KED) | 0.014 ppb             |                   |
| 208Pb (KED) | 1.153 ppb             |                   |
| 209Bi (KED) | 155.325 %             |                   |
| 232Th (KED) | 0.369 ppb             |                   |
| 238U (KED)  | 0.054 ppb             |                   |

| Category   | Concentration average | Intensity average | Intensity RSD |
|------------|-----------------------|-------------------|---------------|
| 6Li (KED)  | 236.546 %             | 5,118 cps         |               |
| 9Be (KED)  | 0.029 ppb             | 7 cps             |               |
| 11B (KED)  | -13.611 ppb           | 1,047 cps         |               |
| 24Mg (KED) | 881.415 ppb           | 846,511 cps       |               |
| 27Al (KED) | 981.341 ppb           | 291,980 cps       |               |

# Comprehensive

10/9/2021 4:31:46 PM

| Category    | Concentration average | Intensity average | Intensity RSD |
|-------------|-----------------------|-------------------|---------------|
| 45Sc (KED)  | 246.727 %             | 112,598 cps       |               |
| 51V (KED)   | 1.707 ppb             | 24,845 cps        |               |
| 52Cr (KED)  | 2.334 ppb             | 50,900 cps        |               |
| 55Mn (KED)  | 28.699 ppb            | 351,576 cps       |               |
| 56Fe (KED)  | 1,005.006 ppb         | 20,341,080 cps    |               |
| 58Ni (KED)  | 4.248 ppb             | 103,233 cps       |               |
| 59Co (KED)  | 0.444 ppb             | 18,060 cps        |               |
| 63Cu (KED)  | 10.165 ppb            | 272,362 cps       |               |
| 64Zn (KED)  | 149.114 ppb           | 1,088,366 cps     |               |
| 69Ga (KED)  | 2.926 ppb             | 32,740 cps        |               |
| 75As (KED)  | 0.416 ppb             | 1,010 cps         |               |
| 80Se (KED)  | 1.531 ppb             | 4,984 cps         |               |
| 85Rb (KED)  | 5.038 ppb             | 55,219 cps        |               |
| 88Sr (KED)  | 11.979 ppb            | 194,493 cps       |               |
| 89Y (KED)   | 221.292 %             | 927,645 cps       |               |
| 107Ag (KED) | 0.026 ppb             | 1,627 cps         |               |
| 114Cd (KED) | 0.061 ppb             | 1,510 cps         |               |
| 115In (KED) | 193.374 %             | 1,458,236 cps     |               |
| 133Cs (KED) | 0.172 ppb             | 7,946 cps         |               |
| 138Ba (KED) | 12.270 ppb            | 714,917 cps       |               |
| 139La (KED) | 1.014 ppb             | 115,495 cps       |               |
| 140Ce (KED) | 2.128 ppb             | 307,649 cps       |               |
| 141Pr (KED) | 0.247 ppb             | 38,530 cps        |               |
| 142Nd (KED) | 1.326 ppb             | 81,788 cps        |               |
| 152Sm (KED) | 0.186 ppb             | 10,351 cps        |               |
| 153Eu (KED) | 0.035 ppb             | 3,907 cps         |               |
| 158Gd (KED) | 0.157 ppb             | 10,965 cps        |               |
| 159Tb (KED) | 200.449 %             | 6,380,353 cps     |               |
| 164Dy (KED) | 0.107 ppb             | 8,436 cps         |               |
| 166Er (KED) | 0.047 ppb             | 5,314 cps         |               |
| 169Tm (KED) | 0.006 ppb             | 2,114 cps         |               |
| 174Yb (KED) | 0.040 ppb             | 4,427 cps         |               |
| 175Lu (KED) | -0.248 ppb            | 31,764 cps        |               |
| 205Tl (KED) | 0.014 ppb             | 2,474 cps         |               |
| 208Pb (KED) | 1.153 ppb             | 152,811 cps       |               |
| 209Bi (KED) | 155.325 %             | 4,333,298 cps     |               |
| 232Th (KED) | 0.369 ppb             | 90,252 cps        |               |
| 238U (KED)  | 0.054 ppb             | 15,350 cps        |               |

# Comprehensive

10/9/2021 4:31:46 PM

## Sample Summary

Instrument ID: iCAP Q

Analysis index: 22

Analysis name: 22-12ti

Analysis started at: 10/9/2021 4:11:30 PM

User name: WINDOWS-UPCI4ER\Administrator

| Category    | Concentration average | Concentration RSD |
|-------------|-----------------------|-------------------|
| 6Li (KED)   | 243.945 %             |                   |
| 9Be (KED)   | 0.028 ppb             |                   |
| 11B (KED)   | -12.742 ppb           |                   |
| 24Mg (KED)  | 979.500 ppb           |                   |
| 27Al (KED)  | 1,287.424 ppb         |                   |
| 45Sc (KED)  | 249.606 %             |                   |
| 51V (KED)   | 2.114 ppb             |                   |
| 52Cr (KED)  | 3.198 ppb             |                   |
| 55Mn (KED)  | 33.088 ppb            |                   |
| 56Fe (KED)  | 1,207.287 ppb         |                   |
| 58Ni (KED)  | 5.343 ppb             |                   |
| 59Co (KED)  | 0.499 ppb             |                   |
| 63Cu (KED)  | 12.754 ppb            |                   |
| 64Zn (KED)  | 164.779 ppb           |                   |
| 69Ga (KED)  | 3.718 ppb             |                   |
| 75As (KED)  | 0.461 ppb             |                   |
| 80Se (KED)  | 1.251 ppb             |                   |
| 85Rb (KED)  | 6.208 ppb             |                   |
| 88Sr (KED)  | 13.970 ppb            |                   |
| 89Y (KED)   | 218.966 %             |                   |
| 107Ag (KED) | 0.020 ppb             |                   |
| 114Cd (KED) | 0.048 ppb             |                   |
| 115In (KED) | 200.557 %             |                   |
| 133Cs (KED) | 0.203 ppb             |                   |
| 138Ba (KED) | 15.360 ppb            |                   |
| 139La (KED) | 1.291 ppb             |                   |
| 140Ce (KED) | 2.683 ppb             |                   |
| 141Pr (KED) | 0.320 ppb             |                   |
| 142Nd (KED) | 1.636 ppb             |                   |
| 152Sm (KED) | 0.222 ppb             |                   |
| 153Eu (KED) | 0.043 ppb             |                   |
| 158Gd (KED) | 0.183 ppb             |                   |
| 159Tb (KED) | 203.032 %             |                   |
| 164Dy (KED) | 0.138 ppb             |                   |
| 166Er (KED) | 0.065 ppb             |                   |
| 169Tm (KED) | 0.009 ppb             |                   |
| 174Yb (KED) | 0.052 ppb             |                   |
| 175Lu (KED) | -0.250 ppb            |                   |
| 205Tl (KED) | 0.016 ppb             |                   |
| 208Pb (KED) | 1.387 ppb             |                   |
| 209Bi (KED) | 156.369 %             |                   |
| 232Th (KED) | 0.370 ppb             |                   |
| 238U (KED)  | 0.067 ppb             |                   |

| Category   | Concentration average | Intensity average | Intensity RSD |
|------------|-----------------------|-------------------|---------------|
| 6Li (KED)  | 243.945 %             | 5,278 cps         |               |
| 9Be (KED)  | 0.028 ppb             | 7 cps             |               |
| 11B (KED)  | -12.742 ppb           | 1,193 cps         |               |
| 24Mg (KED) | 979.500 ppb           | 969,990 cps       |               |
| 27Al (KED) | 1,287.424 ppb         | 387,394 cps       |               |

# Comprehensive

10/9/2021 4:31:46 PM

| Category    | Concentration average | Intensity average | Intensity RSD |
|-------------|-----------------------|-------------------|---------------|
| 45Sc (KED)  | 249.606 %             | 113,912 cps       |               |
| 51V (KED)   | 2.114 ppb             | 31,122 cps        |               |
| 52Cr (KED)  | 3.198 ppb             | 70,348 cps        |               |
| 55Mn (KED)  | 33.088 ppb            | 410,022 cps       |               |
| 56Fe (KED)  | 1,207.287 ppb         | 24,716,204 cps    |               |
| 58Ni (KED)  | 5.343 ppb             | 131,005 cps       |               |
| 59Co (KED)  | 0.499 ppb             | 20,544 cps        |               |
| 63Cu (KED)  | 12.754 ppb            | 337,672 cps       |               |
| 64Zn (KED)  | 164.779 ppb           | 1,189,652 cps     |               |
| 69Ga (KED)  | 3.718 ppb             | 41,121 cps        |               |
| 75As (KED)  | 0.461 ppb             | 1,103 cps         |               |
| 80Se (KED)  | 1.251 ppb             | 4,721 cps         |               |
| 85Rb (KED)  | 6.208 ppb             | 67,318 cps        |               |
| 88Sr (KED)  | 13.970 ppb            | 224,331 cps       |               |
| 89Y (KED)   | 218.966 %             | 917,895 cps       |               |
| 107Ag (KED) | 0.020 ppb             | 1,297 cps         |               |
| 114Cd (KED) | 0.048 ppb             | 1,247 cps         |               |
| 115In (KED) | 200.557 %             | 1,512,398 cps     |               |
| 133Cs (KED) | 0.203 ppb             | 9,680 cps         |               |
| 138Ba (KED) | 15.360 ppb            | 905,790 cps       |               |
| 139La (KED) | 1.291 ppb             | 148,802 cps       |               |
| 140Ce (KED) | 2.683 ppb             | 392,485 cps       |               |
| 141Pr (KED) | 0.320 ppb             | 50,609 cps        |               |
| 142Nd (KED) | 1.636 ppb             | 102,123 cps       |               |
| 152Sm (KED) | 0.222 ppb             | 12,476 cps        |               |
| 153Eu (KED) | 0.043 ppb             | 4,858 cps         |               |
| 158Gd (KED) | 0.183 ppb             | 12,903 cps        |               |
| 159Tb (KED) | 203.032 %             | 6,462,580 cps     |               |
| 164Dy (KED) | 0.138 ppb             | 11,078 cps        |               |
| 166Er (KED) | 0.065 ppb             | 7,022 cps         |               |
| 169Tm (KED) | 0.009 ppb             | 2,820 cps         |               |
| 174Yb (KED) | 0.052 ppb             | 5,838 cps         |               |
| 175Lu (KED) | -0.250 ppb            | 31,778 cps        |               |
| 205Tl (KED) | 0.016 ppb             | 2,827 cps         |               |
| 208Pb (KED) | 1.387 ppb             | 182,416 cps       |               |
| 209Bi (KED) | 156.369 %             | 4,362,436 cps     |               |
| 232Th (KED) | 0.370 ppb             | 91,229 cps        |               |
| 238U (KED)  | 0.067 ppb             | 19,025 cps        |               |

# Comprehensive

10/9/2021 4:31:46 PM

## Sample Summary

Instrument ID: iCAP Q

Analysis index: 23

Analysis name: 7ti

Analysis started at: 10/9/2021 4:14:06 PM

User name: WINDOWS-UPCI4ER\Administrator

| Category    | Concentration average | Concentration RSD |
|-------------|-----------------------|-------------------|
| 6Li (KED)   | 247.336 %             |                   |
| 9Be (KED)   | 0.042 ppb             |                   |
| 11B (KED)   | -16.603 ppb           |                   |
| 24Mg (KED)  | 890.255 ppb           |                   |
| 27Al (KED)  | 968.574 ppb           |                   |
| 45Sc (KED)  | 251.088 %             |                   |
| 51V (KED)   | 1.677 ppb             |                   |
| 52Cr (KED)  | 2.938 ppb             |                   |
| 55Mn (KED)  | 26.772 ppb            |                   |
| 56Fe (KED)  | 960.329 ppb           |                   |
| 58Ni (KED)  | 3.984 ppb             |                   |
| 59Co (KED)  | 0.426 ppb             |                   |
| 63Cu (KED)  | 8.181 ppb             |                   |
| 64Zn (KED)  | 182.438 ppb           |                   |
| 69Ga (KED)  | 3.015 ppb             |                   |
| 75As (KED)  | 0.385 ppb             |                   |
| 80Se (KED)  | 1.440 ppb             |                   |
| 85Rb (KED)  | 6.443 ppb             |                   |
| 88Sr (KED)  | 11.775 ppb            |                   |
| 89Y (KED)   | 219.028 %             |                   |
| 107Ag (KED) | 0.025 ppb             |                   |
| 114Cd (KED) | 0.070 ppb             |                   |
| 115In (KED) | 203.248 %             |                   |
| 133Cs (KED) | 0.167 ppb             |                   |
| 138Ba (KED) | 12.330 ppb            |                   |
| 139La (KED) | 1.073 ppb             |                   |
| 140Ce (KED) | 2.200 ppb             |                   |
| 141Pr (KED) | 0.256 ppb             |                   |
| 142Nd (KED) | 1.335 ppb             |                   |
| 152Sm (KED) | 0.186 ppb             |                   |
| 153Eu (KED) | 0.035 ppb             |                   |
| 158Gd (KED) | 0.151 ppb             |                   |
| 159Tb (KED) | 202.629 %             |                   |
| 164Dy (KED) | 0.114 ppb             |                   |
| 166Er (KED) | 0.053 ppb             |                   |
| 169Tm (KED) | 0.006 ppb             |                   |
| 174Yb (KED) | 0.039 ppb             |                   |
| 175Lu (KED) | -0.247 ppb            |                   |
| 205Tl (KED) | 0.015 ppb             |                   |
| 208Pb (KED) | 1.092 ppb             |                   |
| 209Bi (KED) | 160.121 %             |                   |
| 232Th (KED) | 0.309 ppb             |                   |
| 238U (KED)  | 0.053 ppb             |                   |

| Category   | Concentration average | Intensity average | Intensity RSD |
|------------|-----------------------|-------------------|---------------|
| 6Li (KED)  | 247.336 %             | 5,351 cps         |               |
| 9Be (KED)  | 0.042 ppb             | 10 cps            |               |
| 11B (KED)  | -16.603 ppb           | 697 cps           |               |
| 24Mg (KED) | 890.255 ppb           | 893,986 cps       |               |
| 27Al (KED) | 968.574 ppb           | 293,279 cps       |               |

# Comprehensive

10/9/2021 4:31:46 PM

| Category    | Concentration average | Intensity average | Intensity RSD |
|-------------|-----------------------|-------------------|---------------|
| 45Sc (KED)  | 251.088 %             | 114,588 cps       |               |
| 51V (KED)   | 1.677 ppb             | 24,848 cps        |               |
| 52Cr (KED)  | 2.938 ppb             | 65,062 cps        |               |
| 55Mn (KED)  | 26.772 ppb            | 333,783 cps       |               |
| 56Fe (KED)  | 960.329 ppb           | 19,781,225 cps    |               |
| 58Ni (KED)  | 3.984 ppb             | 98,612 cps        |               |
| 59Co (KED)  | 0.426 ppb             | 17,656 cps        |               |
| 63Cu (KED)  | 8.181 ppb             | 217,297 cps       |               |
| 64Zn (KED)  | 182.438 ppb           | 1,317,104 cps     |               |
| 69Ga (KED)  | 3.015 ppb             | 33,378 cps        |               |
| 75As (KED)  | 0.385 ppb             | 927 cps           |               |
| 80Se (KED)  | 1.440 ppb             | 4,864 cps         |               |
| 85Rb (KED)  | 6.443 ppb             | 69,886 cps        |               |
| 88Sr (KED)  | 11.775 ppb            | 189,234 cps       |               |
| 89Y (KED)   | 219.028 %             | 918,157 cps       |               |
| 107Ag (KED) | 0.025 ppb             | 1,637 cps         |               |
| 114Cd (KED) | 0.070 ppb             | 1,810 cps         |               |
| 115In (KED) | 203.248 %             | 1,532,693 cps     |               |
| 133Cs (KED) | 0.167 ppb             | 8,066 cps         |               |
| 138Ba (KED) | 12.330 ppb            | 726,207 cps       |               |
| 139La (KED) | 1.073 ppb             | 123,470 cps       |               |
| 140Ce (KED) | 2.200 ppb             | 321,438 cps       |               |
| 141Pr (KED) | 0.256 ppb             | 40,389 cps        |               |
| 142Nd (KED) | 1.335 ppb             | 83,227 cps        |               |
| 152Sm (KED) | 0.186 ppb             | 10,428 cps        |               |
| 153Eu (KED) | 0.035 ppb             | 3,911 cps         |               |
| 158Gd (KED) | 0.151 ppb             | 10,691 cps        |               |
| 159Tb (KED) | 202.629 %             | 6,449,753 cps     |               |
| 164Dy (KED) | 0.114 ppb             | 9,157 cps         |               |
| 166Er (KED) | 0.053 ppb             | 5,875 cps         |               |
| 169Tm (KED) | 0.006 ppb             | 2,140 cps         |               |
| 174Yb (KED) | 0.039 ppb             | 4,347 cps         |               |
| 175Lu (KED) | -0.247 ppb            | 32,429 cps        |               |
| 205Tl (KED) | 0.015 ppb             | 2,590 cps         |               |
| 208Pb (KED) | 1.092 ppb             | 149,957 cps       |               |
| 209Bi (KED) | 160.121 %             | 4,467,099 cps     |               |
| 232Th (KED) | 0.309 ppb             | 77,990 cps        |               |
| 238U (KED)  | 0.053 ppb             | 15,530 cps        |               |

# Comprehensive

10/9/2021 4:31:46 PM

## Sample Summary

Instrument ID: iCAP Q

Analysis index: 24

Analysis name: 6ti

Analysis started at: 10/9/2021 4:16:35 PM

User name: WINDOWS-UPCI4ER\Administrator

| Category    | Concentration average | Concentration RSD |
|-------------|-----------------------|-------------------|
| 6Li (KED)   | 256.275 %             |                   |
| 9Be (KED)   | 0.027 ppb             |                   |
| 11B (KED)   | -16.350 ppb           |                   |
| 24Mg (KED)  | 826.162 ppb           |                   |
| 27Al (KED)  | 877.755 ppb           |                   |
| 45Sc (KED)  | 259.808 %             |                   |
| 51V (KED)   | 1.552 ppb             |                   |
| 52Cr (KED)  | 2.157 ppb             |                   |
| 55Mn (KED)  | 27.268 ppb            |                   |
| 56Fe (KED)  | 944.402 ppb           |                   |
| 58Ni (KED)  | 4.317 ppb             |                   |
| 59Co (KED)  | 0.411 ppb             |                   |
| 63Cu (KED)  | 9.355 ppb             |                   |
| 64Zn (KED)  | 167.823 ppb           |                   |
| 69Ga (KED)  | 3.006 ppb             |                   |
| 75As (KED)  | 0.414 ppb             |                   |
| 80Se (KED)  | 1.676 ppb             |                   |
| 85Rb (KED)  | 5.641 ppb             |                   |
| 88Sr (KED)  | 12.268 ppb            |                   |
| 89Y (KED)   | 224.183 %             |                   |
| 107Ag (KED) | 0.019 ppb             |                   |
| 114Cd (KED) | 0.068 ppb             |                   |
| 115In (KED) | 199.876 %             |                   |
| 133Cs (KED) | 0.153 ppb             |                   |
| 138Ba (KED) | 12.540 ppb            |                   |
| 139La (KED) | 1.270 ppb             |                   |
| 140Ce (KED) | 2.514 ppb             |                   |
| 141Pr (KED) | 0.290 ppb             |                   |
| 142Nd (KED) | 1.551 ppb             |                   |
| 152Sm (KED) | 0.181 ppb             |                   |
| 153Eu (KED) | 0.035 ppb             |                   |
| 158Gd (KED) | 0.157 ppb             |                   |
| 159Tb (KED) | 207.577 %             |                   |
| 164Dy (KED) | 0.104 ppb             |                   |
| 166Er (KED) | 0.051 ppb             |                   |
| 169Tm (KED) | 0.006 ppb             |                   |
| 174Yb (KED) | 0.038 ppb             |                   |
| 175Lu (KED) | -0.255 ppb            |                   |
| 205Tl (KED) | 0.013 ppb             |                   |
| 208Pb (KED) | 1.231 ppb             |                   |
| 209Bi (KED) | 162.198 %             |                   |
| 232Th (KED) | 0.349 ppb             |                   |
| 238U (KED)  | 0.052 ppb             |                   |

| Category   | Concentration average | Intensity average | Intensity RSD |
|------------|-----------------------|-------------------|---------------|
| 6Li (KED)  | 256.275 %             | 5,545 cps         |               |
| 9Be (KED)  | 0.027 ppb             | 7 cps             |               |
| 11B (KED)  | -16.350 ppb           | 757 cps           |               |
| 24Mg (KED) | 826.162 ppb           | 859,708 cps       |               |
| 27Al (KED) | 877.755 ppb           | 275,049 cps       |               |

# Comprehensive

10/9/2021 4:31:46 PM

| Category    | Concentration average | Intensity average | Intensity RSD |
|-------------|-----------------------|-------------------|---------------|
| 45Sc (KED)  | 259.808 %             | 118,567 cps       |               |
| 51V (KED)   | 1.552 ppb             | 23,786 cps        |               |
| 52Cr (KED)  | 2.157 ppb             | 49,578 cps        |               |
| 55Mn (KED)  | 27.268 ppb            | 351,763 cps       |               |
| 56Fe (KED)  | 944.402 ppb           | 20,129,095 cps    |               |
| 58Ni (KED)  | 4.317 ppb             | 110,434 cps       |               |
| 59Co (KED)  | 0.411 ppb             | 17,609 cps        |               |
| 63Cu (KED)  | 9.355 ppb             | 254,075 cps       |               |
| 64Zn (KED)  | 167.823 ppb           | 1,240,426 cps     |               |
| 69Ga (KED)  | 3.006 ppb             | 34,063 cps        |               |
| 75As (KED)  | 0.414 ppb             | 1,017 cps         |               |
| 80Se (KED)  | 1.676 ppb             | 5,161 cps         |               |
| 85Rb (KED)  | 5.641 ppb             | 62,634 cps        |               |
| 88Sr (KED)  | 12.268 ppb            | 201,768 cps       |               |
| 89Y (KED)   | 224.183 %             | 939,766 cps       |               |
| 107Ag (KED) | 0.019 ppb             | 1,243 cps         |               |
| 114Cd (KED) | 0.068 ppb             | 1,713 cps         |               |
| 115In (KED) | 199.876 %             | 1,507,260 cps     |               |
| 133Cs (KED) | 0.153 ppb             | 7,302 cps         |               |
| 138Ba (KED) | 12.540 ppb            | 756,591 cps       |               |
| 139La (KED) | 1.270 ppb             | 149,661 cps       |               |
| 140Ce (KED) | 2.514 ppb             | 376,125 cps       |               |
| 141Pr (KED) | 0.290 ppb             | 46,918 cps        |               |
| 142Nd (KED) | 1.551 ppb             | 98,992 cps        |               |
| 152Sm (KED) | 0.181 ppb             | 10,401 cps        |               |
| 153Eu (KED) | 0.035 ppb             | 3,991 cps         |               |
| 158Gd (KED) | 0.157 ppb             | 11,342 cps        |               |
| 159Tb (KED) | 207.577 %             | 6,607,260 cps     |               |
| 164Dy (KED) | 0.104 ppb             | 8,543 cps         |               |
| 166Er (KED) | 0.051 ppb             | 5,878 cps         |               |
| 169Tm (KED) | 0.006 ppb             | 2,154 cps         |               |
| 174Yb (KED) | 0.038 ppb             | 4,377 cps         |               |
| 175Lu (KED) | -0.255 ppb            | 31,413 cps        |               |
| 205Tl (KED) | 0.013 ppb             | 2,297 cps         |               |
| 208Pb (KED) | 1.231 ppb             | 169,401 cps       |               |
| 209Bi (KED) | 162.198 %             | 4,525,057 cps     |               |
| 232Th (KED) | 0.349 ppb             | 89,319 cps        |               |
| 238U (KED)  | 0.052 ppb             | 15,620 cps        |               |

# Comprehensive

10/9/2021 4:31:46 PM

## Sample Summary

Instrument ID: iCAP Q

Analysis index: 25

Analysis name: 19ti

Analysis started at: 10/9/2021 4:19:06 PM

User name: WINDOWS-UPCI4ER\Administrator

| Category    | Concentration average | Concentration RSD |
|-------------|-----------------------|-------------------|
| 6Li (KED)   | 242.865 %             |                   |
| 9Be (KED)   | 0.028 ppb             |                   |
| 11B (KED)   | -10.072 ppb           |                   |
| 24Mg (KED)  | 549.038 ppb           |                   |
| 27Al (KED)  | 564.704 ppb           |                   |
| 45Sc (KED)  | 250.874 %             |                   |
| 51V (KED)   | 0.969 ppb             |                   |
| 52Cr (KED)  | 2.524 ppb             |                   |
| 55Mn (KED)  | 16.771 ppb            |                   |
| 56Fe (KED)  | 590.825 ppb           |                   |
| 58Ni (KED)  | 2.930 ppb             |                   |
| 59Co (KED)  | 0.287 ppb             |                   |
| 63Cu (KED)  | 11.902 ppb            |                   |
| 64Zn (KED)  | 143.424 ppb           |                   |
| 69Ga (KED)  | 1.960 ppb             |                   |
| 75As (KED)  | 0.311 ppb             |                   |
| 80Se (KED)  | 1.611 ppb             |                   |
| 85Rb (KED)  | 4.231 ppb             |                   |
| 88Sr (KED)  | 7.784 ppb             |                   |
| 89Y (KED)   | 229.902 %             |                   |
| 107Ag (KED) | 0.034 ppb             |                   |
| 114Cd (KED) | 0.099 ppb             |                   |
| 115In (KED) | 201.983 %             |                   |
| 133Cs (KED) | 0.103 ppb             |                   |
| 138Ba (KED) | 8.440 ppb             |                   |
| 139La (KED) | 0.624 ppb             |                   |
| 140Ce (KED) | 1.325 ppb             |                   |
| 141Pr (KED) | 0.155 ppb             |                   |
| 142Nd (KED) | 0.797 ppb             |                   |
| 152Sm (KED) | 0.102 ppb             |                   |
| 153Eu (KED) | 0.022 ppb             |                   |
| 158Gd (KED) | 0.086 ppb             |                   |
| 159Tb (KED) | 203.584 %             |                   |
| 164Dy (KED) | 0.061 ppb             |                   |
| 166Er (KED) | 0.031 ppb             |                   |
| 169Tm (KED) | 0.003 ppb             |                   |
| 174Yb (KED) | 0.023 ppb             |                   |
| 175Lu (KED) | -0.252 ppb            |                   |
| 205Tl (KED) | 0.011 ppb             |                   |
| 208Pb (KED) | 1.108 ppb             |                   |
| 209Bi (KED) | 164.722 %             |                   |
| 232Th (KED) | 0.217 ppb             |                   |
| 238U (KED)  | 0.034 ppb             |                   |

| Category   | Concentration average | Intensity average | Intensity RSD |
|------------|-----------------------|-------------------|---------------|
| 6Li (KED)  | 242.865 %             | 5,254 cps         |               |
| 9Be (KED)  | 0.028 ppb             | 7 cps             |               |
| 11B (KED)  | -10.072 ppb           | 1,537 cps         |               |
| 24Mg (KED) | 549.038 ppb           | 541,869 cps       |               |
| 27Al (KED) | 564.704 ppb           | 171,011 cps       |               |

# Comprehensive

10/9/2021 4:31:46 PM

| Category    | Concentration average | Intensity average | Intensity RSD |
|-------------|-----------------------|-------------------|---------------|
| 45Sc (KED)  | 250.874 %             | 114,490 cps       |               |
| 51V (KED)   | 0.969 ppb             | 14,342 cps        |               |
| 52Cr (KED)  | 2.524 ppb             | 55,915 cps        |               |
| 55Mn (KED)  | 16.771 ppb            | 209,023 cps       |               |
| 56Fe (KED)  | 590.825 ppb           | 12,167,542 cps    |               |
| 58Ni (KED)  | 2.930 ppb             | 72,826 cps        |               |
| 59Co (KED)  | 0.287 ppb             | 11,929 cps        |               |
| 63Cu (KED)  | 11.902 ppb            | 330,998 cps       |               |
| 64Zn (KED)  | 143.424 ppb           | 1,087,730 cps     |               |
| 69Ga (KED)  | 1.960 ppb             | 22,831 cps        |               |
| 75As (KED)  | 0.311 ppb             | 790 cps           |               |
| 80Se (KED)  | 1.611 ppb             | 5,241 cps         |               |
| 85Rb (KED)  | 4.231 ppb             | 48,190 cps        |               |
| 88Sr (KED)  | 7.784 ppb             | 131,530 cps       |               |
| 89Y (KED)   | 229.902 %             | 963,740 cps       |               |
| 107Ag (KED) | 0.034 ppb             | 2,244 cps         |               |
| 114Cd (KED) | 0.099 ppb             | 2,487 cps         |               |
| 115In (KED) | 201.983 %             | 1,523,152 cps     |               |
| 133Cs (KED) | 0.103 ppb             | 5,004 cps         |               |
| 138Ba (KED) | 8.440 ppb             | 500,325 cps       |               |
| 139La (KED) | 0.624 ppb             | 72,316 cps        |               |
| 140Ce (KED) | 1.325 ppb             | 195,022 cps       |               |
| 141Pr (KED) | 0.155 ppb             | 24,668 cps        |               |
| 142Nd (KED) | 0.797 ppb             | 50,041 cps        |               |
| 152Sm (KED) | 0.102 ppb             | 5,795 cps         |               |
| 153Eu (KED) | 0.022 ppb             | 2,540 cps         |               |
| 158Gd (KED) | 0.086 ppb             | 6,115 cps         |               |
| 159Tb (KED) | 203.584 %             | 6,480,168 cps     |               |
| 164Dy (KED) | 0.061 ppb             | 4,904 cps         |               |
| 166Er (KED) | 0.031 ppb             | 3,874 cps         |               |
| 169Tm (KED) | 0.003 ppb             | 1,153 cps         |               |
| 174Yb (KED) | 0.023 ppb             | 2,654 cps         |               |
| 175Lu (KED) | -0.252 ppb            | 31,460 cps        |               |
| 205Tl (KED) | 0.011 ppb             | 2,034 cps         |               |
| 208Pb (KED) | 1.108 ppb             | 156,246 cps       |               |
| 209Bi (KED) | 164.722 %             | 4,595,472 cps     |               |
| 232Th (KED) | 0.217 ppb             | 56,538 cps        |               |
| 238U (KED)  | 0.034 ppb             | 10,381 cps        |               |

# Comprehensive

10/9/2021 4:31:46 PM

## Sample Summary

Instrument ID: iCAP Q

Analysis index: 26

Analysis name: 00090ti

Analysis started at: 10/9/2021 4:21:40 PM

User name: WINDOWS-UPCI4ER\Administrator

| Category    | Concentration average | Concentration RSD |
|-------------|-----------------------|-------------------|
| 6Li (KED)   | 261.671 %             |                   |
| 9Be (KED)   | 0.013 ppb             |                   |
| 11B (KED)   | -17.435 ppb           |                   |
| 24Mg (KED)  | 382.108 ppb           |                   |
| 27Al (KED)  | 355.988 ppb           |                   |
| 45Sc (KED)  | 257.499 %             |                   |
| 51V (KED)   | 0.656 ppb             |                   |
| 52Cr (KED)  | 1.812 ppb             |                   |
| 55Mn (KED)  | 10.721 ppb            |                   |
| 56Fe (KED)  | 357.773 ppb           |                   |
| 58Ni (KED)  | 1.884 ppb             |                   |
| 59Co (KED)  | 0.163 ppb             |                   |
| 63Cu (KED)  | 8.232 ppb             |                   |
| 64Zn (KED)  | 175.739 ppb           |                   |
| 69Ga (KED)  | 1.384 ppb             |                   |
| 75As (KED)  | 0.204 ppb             |                   |
| 80Se (KED)  | 1.469 ppb             |                   |
| 85Rb (KED)  | 3.944 ppb             |                   |
| 88Sr (KED)  | 5.835 ppb             |                   |
| 89Y (KED)   | 224.149 %             |                   |
| 107Ag (KED) | 0.015 ppb             |                   |
| 114Cd (KED) | 0.042 ppb             |                   |
| 115In (KED) | 208.039 %             |                   |
| 133Cs (KED) | 0.059 ppb             |                   |
| 138Ba (KED) | 5.775 ppb             |                   |
| 139La (KED) | 0.338 ppb             |                   |
| 140Ce (KED) | 0.696 ppb             |                   |
| 141Pr (KED) | 0.081 ppb             |                   |
| 142Nd (KED) | 0.445 ppb             |                   |
| 152Sm (KED) | 0.063 ppb             |                   |
| 153Eu (KED) | 0.012 ppb             |                   |
| 158Gd (KED) | 0.052 ppb             |                   |
| 159Tb (KED) | 212.684 %             |                   |
| 164Dy (KED) | 0.040 ppb             |                   |
| 166Er (KED) | 0.014 ppb             |                   |
| 169Tm (KED) | 0.002 ppb             |                   |
| 174Yb (KED) | 0.015 ppb             |                   |
| 175Lu (KED) | -0.253 ppb            |                   |
| 205Tl (KED) | 0.010 ppb             |                   |
| 208Pb (KED) | 0.741 ppb             |                   |
| 209Bi (KED) | 167.181 %             |                   |
| 232Th (KED) | 0.108 ppb             |                   |
| 238U (KED)  | 0.022 ppb             |                   |

| Category   | Concentration average | Intensity average | Intensity RSD |
|------------|-----------------------|-------------------|---------------|
| 6Li (KED)  | 261.671 %             | 5,661 cps         |               |
| 9Be (KED)  | 0.013 ppb             | 3 cps             |               |
| 11B (KED)  | -17.435 ppb           | 620 cps           |               |
| 24Mg (KED) | 382.108 ppb           | 406,743 cps       |               |
| 27Al (KED) | 355.988 ppb           | 110,804 cps       |               |

# Comprehensive

10/9/2021 4:31:46 PM

| Category    | Concentration average | Intensity average | Intensity RSD |
|-------------|-----------------------|-------------------|---------------|
| 45Sc (KED)  | 257.499 %             | 117,514 cps       |               |
| 51V (KED)   | 0.656 ppb             | 9,981 cps         |               |
| 52Cr (KED)  | 1.812 ppb             | 41,365 cps        |               |
| 55Mn (KED)  | 10.721 ppb            | 137,256 cps       |               |
| 56Fe (KED)  | 357.773 ppb           | 7,570,915 cps     |               |
| 58Ni (KED)  | 1.884 ppb             | 48,541 cps        |               |
| 59Co (KED)  | 0.163 ppb             | 6,989 cps         |               |
| 63Cu (KED)  | 8.232 ppb             | 223,768 cps       |               |
| 64Zn (KED)  | 175.739 ppb           | 1,298,552 cps     |               |
| 69Ga (KED)  | 1.384 ppb             | 15,770 cps        |               |
| 75As (KED)  | 0.204 ppb             | 517 cps           |               |
| 80Se (KED)  | 1.469 ppb             | 5,001 cps         |               |
| 85Rb (KED)  | 3.944 ppb             | 43,800 cps        |               |
| 88Sr (KED)  | 5.835 ppb             | 96,298 cps        |               |
| 89Y (KED)   | 224.149 %             | 939,623 cps       |               |
| 107Ag (KED) | 0.015 ppb             | 1,050 cps         |               |
| 114Cd (KED) | 0.042 ppb             | 1,140 cps         |               |
| 115In (KED) | 208.039 %             | 1,568,819 cps     |               |
| 133Cs (KED) | 0.059 ppb             | 2,974 cps         |               |
| 138Ba (KED) | 5.775 ppb             | 358,558 cps       |               |
| 139La (KED) | 0.338 ppb             | 41,191 cps        |               |
| 140Ce (KED) | 0.696 ppb             | 107,582 cps       |               |
| 141Pr (KED) | 0.081 ppb             | 13,541 cps        |               |
| 142Nd (KED) | 0.445 ppb             | 29,334 cps        |               |
| 152Sm (KED) | 0.063 ppb             | 3,747 cps         |               |
| 153Eu (KED) | 0.012 ppb             | 1,410 cps         |               |
| 158Gd (KED) | 0.052 ppb             | 3,891 cps         |               |
| 159Tb (KED) | 212.684 %             | 6,769,809 cps     |               |
| 164Dy (KED) | 0.040 ppb             | 3,384 cps         |               |
| 166Er (KED) | 0.014 ppb             | 2,337 cps         |               |
| 169Tm (KED) | 0.002 ppb             | 940 cps           |               |
| 174Yb (KED) | 0.015 ppb             | 1,870 cps         |               |
| 175Lu (KED) | -0.253 ppb            | 32,653 cps        |               |
| 205Tl (KED) | 0.010 ppb             | 1,887 cps         |               |
| 208Pb (KED) | 0.741 ppb             | 110,748 cps       |               |
| 209Bi (KED) | 167.181 %             | 4,664,069 cps     |               |
| 232Th (KED) | 0.108 ppb             | 28,947 cps        |               |
| 238U (KED)  | 0.022 ppb             | 6,862 cps         |               |

# Comprehensive

10/9/2021 4:31:46 PM

## Sample Summary

Instrument ID: iCAP Q

Analysis index: 27

Analysis name: 00070ti

Analysis started at: 10/9/2021 4:24:01 PM

User name: WINDOWS-UPCI4ER\Administrator

| Category    | Concentration average | Concentration RSD |
|-------------|-----------------------|-------------------|
| 6Li (KED)   | 265.678 %             |                   |
| 9Be (KED)   | 0.013 ppb             |                   |
| 11B (KED)   | -15.167 ppb           |                   |
| 24Mg (KED)  | 795.805 ppb           |                   |
| 27Al (KED)  | 650.631 ppb           |                   |
| 45Sc (KED)  | 265.707 %             |                   |
| 51V (KED)   | 1.103 ppb             |                   |
| 52Cr (KED)  | 1.891 ppb             |                   |
| 55Mn (KED)  | 18.206 ppb            |                   |
| 56Fe (KED)  | 643.503 ppb           |                   |
| 58Ni (KED)  | 2.889 ppb             |                   |
| 59Co (KED)  | 0.273 ppb             |                   |
| 63Cu (KED)  | 9.896 ppb             |                   |
| 64Zn (KED)  | 159.324 ppb           |                   |
| 69Ga (KED)  | 2.104 ppb             |                   |
| 75As (KED)  | 0.313 ppb             |                   |
| 80Se (KED)  | 1.244 ppb             |                   |
| 85Rb (KED)  | 11.704 ppb            |                   |
| 88Sr (KED)  | 8.752 ppb             |                   |
| 89Y (KED)   | 230.802 %             |                   |
| 107Ag (KED) | 0.021 ppb             |                   |
| 114Cd (KED) | 0.043 ppb             |                   |
| 115In (KED) | 202.334 %             |                   |
| 133Cs (KED) | 0.114 ppb             |                   |
| 138Ba (KED) | 8.527 ppb             |                   |
| 139La (KED) | 0.587 ppb             |                   |
| 140Ce (KED) | 1.172 ppb             |                   |
| 141Pr (KED) | 0.140 ppb             |                   |
| 142Nd (KED) | 0.745 ppb             |                   |
| 152Sm (KED) | 0.107 ppb             |                   |
| 153Eu (KED) | 0.020 ppb             |                   |
| 158Gd (KED) | 0.091 ppb             |                   |
| 159Tb (KED) | 216.489 %             |                   |
| 164Dy (KED) | 0.064 ppb             |                   |
| 166Er (KED) | 0.027 ppb             |                   |
| 169Tm (KED) | 0.004 ppb             |                   |
| 174Yb (KED) | 0.024 ppb             |                   |
| 175Lu (KED) | -0.253 ppb            |                   |
| 205Tl (KED) | 0.013 ppb             |                   |
| 208Pb (KED) | 0.940 ppb             |                   |
| 209Bi (KED) | 163.065 %             |                   |
| 232Th (KED) | 0.183 ppb             |                   |
| 238U (KED)  | 0.034 ppb             |                   |

| Category   | Concentration average | Intensity average | Intensity RSD |
|------------|-----------------------|-------------------|---------------|
| 6Li (KED)  | 265.678 %             | 5,748 cps         |               |
| 9Be (KED)  | 0.013 ppb             | 3 cps             |               |
| 11B (KED)  | -15.167 ppb           | 953 cps           |               |
| 24Mg (KED) | 795.805 ppb           | 858,553 cps       |               |
| 27Al (KED) | 650.631 ppb           | 208,618 cps       |               |

# Comprehensive

10/9/2021 4:31:46 PM

| Category    | Concentration average | Intensity average | Intensity RSD |
|-------------|-----------------------|-------------------|---------------|
| 45Sc (KED)  | 265.707 %             | 121,260 cps       |               |
| 51V (KED)   | 1.103 ppb             | 17,295 cps        |               |
| 52Cr (KED)  | 1.891 ppb             | 44,516 cps        |               |
| 55Mn (KED)  | 18.206 ppb            | 240,300 cps       |               |
| 56Fe (KED)  | 643.503 ppb           | 14,034,054 cps    |               |
| 58Ni (KED)  | 2.889 ppb             | 76,051 cps        |               |
| 59Co (KED)  | 0.273 ppb             | 12,019 cps        |               |
| 63Cu (KED)  | 9.896 ppb             | 276,597 cps       |               |
| 64Zn (KED)  | 159.324 ppb           | 1,212,583 cps     |               |
| 69Ga (KED)  | 2.104 ppb             | 24,598 cps        |               |
| 75As (KED)  | 0.313 ppb             | 800 cps           |               |
| 80Se (KED)  | 1.244 ppb             | 4,971 cps         |               |
| 85Rb (KED)  | 11.704 ppb            | 133,720 cps       |               |
| 88Sr (KED)  | 8.752 ppb             | 148,389 cps       |               |
| 89Y (KED)   | 230.802 %             | 967,513 cps       |               |
| 107Ag (KED) | 0.021 ppb             | 1,357 cps         |               |
| 114Cd (KED) | 0.043 ppb             | 1,130 cps         |               |
| 115In (KED) | 202.334 %             | 1,525,799 cps     |               |
| 133Cs (KED) | 0.114 ppb             | 5,535 cps         |               |
| 138Ba (KED) | 8.527 ppb             | 537,519 cps       |               |
| 139La (KED) | 0.587 ppb             | 72,386 cps        |               |
| 140Ce (KED) | 1.172 ppb             | 183,620 cps       |               |
| 141Pr (KED) | 0.140 ppb             | 23,616 cps        |               |
| 142Nd (KED) | 0.745 ppb             | 49,773 cps        |               |
| 152Sm (KED) | 0.107 ppb             | 6,452 cps         |               |
| 153Eu (KED) | 0.020 ppb             | 2,440 cps         |               |
| 158Gd (KED) | 0.091 ppb             | 6,922 cps         |               |
| 159Tb (KED) | 216.489 %             | 6,890,908 cps     |               |
| 164Dy (KED) | 0.064 ppb             | 5,455 cps         |               |
| 166Er (KED) | 0.027 ppb             | 3,644 cps         |               |
| 169Tm (KED) | 0.004 ppb             | 1,437 cps         |               |
| 174Yb (KED) | 0.024 ppb             | 2,944 cps         |               |
| 175Lu (KED) | -0.253 ppb            | 33,221 cps        |               |
| 205Tl (KED) | 0.013 ppb             | 2,397 cps         |               |
| 208Pb (KED) | 0.940 ppb             | 133,388 cps       |               |
| 209Bi (KED) | 163.065 %             | 4,549,232 cps     |               |
| 232Th (KED) | 0.183 ppb             | 47,350 cps        |               |
| 238U (KED)  | 0.034 ppb             | 10,208 cps        |               |

# Comprehensive

10/9/2021 4:31:46 PM

## Sample Summary

Instrument ID: iCAP Q

Analysis index: 28

Analysis name: 00098ti

Analysis started at: 10/9/2021 4:26:30 PM

User name: WINDOWS-UPCI4ER\Administrator

| Category    | Concentration average | Concentration RSD |
|-------------|-----------------------|-------------------|
| 6Li (KED)   | 252.730 %             |                   |
| 9Be (KED)   | 0.027 ppb             |                   |
| 11B (KED)   | -15.782 ppb           |                   |
| 24Mg (KED)  | 638.688 ppb           |                   |
| 27Al (KED)  | 518.310 ppb           |                   |
| 45Sc (KED)  | 264.209 %             |                   |
| 51V (KED)   | 0.902 ppb             |                   |
| 52Cr (KED)  | 2.291 ppb             |                   |
| 55Mn (KED)  | 14.963 ppb            |                   |
| 56Fe (KED)  | 519.059 ppb           |                   |
| 58Ni (KED)  | 2.469 ppb             |                   |
| 59Co (KED)  | 0.240 ppb             |                   |
| 63Cu (KED)  | 9.147 ppb             |                   |
| 64Zn (KED)  | 165.802 ppb           |                   |
| 69Ga (KED)  | 1.711 ppb             |                   |
| 75As (KED)  | 0.234 ppb             |                   |
| 80Se (KED)  | 1.206 ppb             |                   |
| 85Rb (KED)  | 8.591 ppb             |                   |
| 88Sr (KED)  | 7.073 ppb             |                   |
| 89Y (KED)   | 231.908 %             |                   |
| 107Ag (KED) | 0.027 ppb             |                   |
| 114Cd (KED) | 0.052 ppb             |                   |
| 115In (KED) | 206.109 %             |                   |
| 133Cs (KED) | 0.097 ppb             |                   |
| 138Ba (KED) | 7.321 ppb             |                   |
| 139La (KED) | 0.519 ppb             |                   |
| 140Ce (KED) | 1.055 ppb             |                   |
| 141Pr (KED) | 0.128 ppb             |                   |
| 142Nd (KED) | 0.676 ppb             |                   |
| 152Sm (KED) | 0.094 ppb             |                   |
| 153Eu (KED) | 0.016 ppb             |                   |
| 158Gd (KED) | 0.076 ppb             |                   |
| 159Tb (KED) | 210.154 %             |                   |
| 164Dy (KED) | 0.056 ppb             |                   |
| 166Er (KED) | 0.024 ppb             |                   |
| 169Tm (KED) | 0.004 ppb             |                   |
| 174Yb (KED) | 0.020 ppb             |                   |
| 175Lu (KED) | -0.252 ppb            |                   |
| 205Tl (KED) | 0.012 ppb             |                   |
| 208Pb (KED) | 0.843 ppb             |                   |
| 209Bi (KED) | 164.183 %             |                   |
| 232Th (KED) | 0.155 ppb             |                   |
| 238U (KED)  | 0.031 ppb             |                   |

| Category   | Concentration average | Intensity average | Intensity RSD |
|------------|-----------------------|-------------------|---------------|
| 6Li (KED)  | 252.730 %             | 5,468 cps         |               |
| 9Be (KED)  | 0.027 ppb             | 7 cps             |               |
| 11B (KED)  | -15.782 ppb           | 823 cps           |               |
| 24Mg (KED) | 638.688 ppb           | 655,733 cps       |               |
| 27Al (KED) | 518.310 ppb           | 165,340 cps       |               |

# Comprehensive

10/9/2021 4:31:46 PM

| Category    | Concentration average | Intensity average | Intensity RSD |
|-------------|-----------------------|-------------------|---------------|
| 45Sc (KED)  | 264.209 %             | 120,576 cps       |               |
| 51V (KED)   | 0.902 ppb             | 14,068 cps        |               |
| 52Cr (KED)  | 2.291 ppb             | 53,505 cps        |               |
| 55Mn (KED)  | 14.963 ppb            | 196,446 cps       |               |
| 56Fe (KED)  | 519.059 ppb           | 11,260,412 cps    |               |
| 58Ni (KED)  | 2.469 ppb             | 64,848 cps        |               |
| 59Co (KED)  | 0.240 ppb             | 10,514 cps        |               |
| 63Cu (KED)  | 9.147 ppb             | 257,036 cps       |               |
| 64Zn (KED)  | 165.802 ppb           | 1,267,765 cps     |               |
| 69Ga (KED)  | 1.711 ppb             | 20,123 cps        |               |
| 75As (KED)  | 0.234 ppb             | 607 cps           |               |
| 80Se (KED)  | 1.206 ppb             | 4,964 cps         |               |
| 85Rb (KED)  | 8.591 ppb             | 98,646 cps        |               |
| 88Sr (KED)  | 7.073 ppb             | 120,628 cps       |               |
| 89Y (KED)   | 231.908 %             | 972,148 cps       |               |
| 107Ag (KED) | 0.027 ppb             | 1,823 cps         |               |
| 114Cd (KED) | 0.052 ppb             | 1,380 cps         |               |
| 115In (KED) | 206.109 %             | 1,554,267 cps     |               |
| 133Cs (KED) | 0.097 ppb             | 4,818 cps         |               |
| 138Ba (KED) | 7.321 ppb             | 448,365 cps       |               |
| 139La (KED) | 0.519 ppb             | 62,175 cps        |               |
| 140Ce (KED) | 1.055 ppb             | 160,607 cps       |               |
| 141Pr (KED) | 0.128 ppb             | 21,071 cps        |               |
| 142Nd (KED) | 0.676 ppb             | 43,837 cps        |               |
| 152Sm (KED) | 0.094 ppb             | 5,475 cps         |               |
| 153Eu (KED) | 0.016 ppb             | 1,950 cps         |               |
| 158Gd (KED) | 0.076 ppb             | 5,581 cps         |               |
| 159Tb (KED) | 210.154 %             | 6,689,263 cps     |               |
| 164Dy (KED) | 0.056 ppb             | 4,691 cps         |               |
| 166Er (KED) | 0.024 ppb             | 3,234 cps         |               |
| 169Tm (KED) | 0.004 ppb             | 1,293 cps         |               |
| 174Yb (KED) | 0.020 ppb             | 2,314 cps         |               |
| 175Lu (KED) | -0.252 ppb            | 32,550 cps        |               |
| 205Tl (KED) | 0.012 ppb             | 2,200 cps         |               |
| 208Pb (KED) | 0.843 ppb             | 121,868 cps       |               |
| 209Bi (KED) | 164.183 %             | 4,580,425 cps     |               |
| 232Th (KED) | 0.155 ppb             | 40,446 cps        |               |
| 238U (KED)  | 0.031 ppb             | 9,537 cps         |               |

# Comprehensive

10/9/2021 4:31:46 PM

## Sample Summary

Instrument ID: iCAP Q

Analysis index: 29

Analysis name: 5ti

Analysis started at: 10/9/2021 4:28:53 PM

User name: WINDOWS-UPCI4ER\Administrator

| Category    | Concentration average | Concentration RSD |
|-------------|-----------------------|-------------------|
| 6Li (KED)   | 267.065 %             |                   |
| 9Be (KED)   | 0.039 ppb             |                   |
| 11B (KED)   | -16.270 ppb           |                   |
| 24Mg (KED)  | 702.396 ppb           |                   |
| 27Al (KED)  | 777.818 ppb           |                   |
| 45Sc (KED)  | 274.605 %             |                   |
| 51V (KED)   | 1.410 ppb             |                   |
| 52Cr (KED)  | 3.317 ppb             |                   |
| 55Mn (KED)  | 22.093 ppb            |                   |
| 56Fe (KED)  | 771.655 ppb           |                   |
| 58Ni (KED)  | 3.586 ppb             |                   |
| 59Co (KED)  | 0.335 ppb             |                   |
| 63Cu (KED)  | 9.871 ppb             |                   |
| 64Zn (KED)  | 157.443 ppb           |                   |
| 69Ga (KED)  | 2.433 ppb             |                   |
| 75As (KED)  | 0.365 ppb             |                   |
| 80Se (KED)  | 1.507 ppb             |                   |
| 85Rb (KED)  | 4.596 ppb             |                   |
| 88Sr (KED)  | 9.896 ppb             |                   |
| 89Y (KED)   | 237.115 %             |                   |
| 107Ag (KED) | 0.018 ppb             |                   |
| 114Cd (KED) | 0.044 ppb             |                   |
| 115In (KED) | 205.941 %             |                   |
| 133Cs (KED) | 0.142 ppb             |                   |
| 138Ba (KED) | 10.405 ppb            |                   |
| 139La (KED) | 0.807 ppb             |                   |
| 140Ce (KED) | 1.706 ppb             |                   |
| 141Pr (KED) | 0.202 ppb             |                   |
| 142Nd (KED) | 1.042 ppb             |                   |
| 152Sm (KED) | 0.146 ppb             |                   |
| 153Eu (KED) | 0.030 ppb             |                   |
| 158Gd (KED) | 0.123 ppb             |                   |
| 159Tb (KED) | 208.906 %             |                   |
| 164Dy (KED) | 0.088 ppb             |                   |
| 166Er (KED) | 0.038 ppb             |                   |
| 169Tm (KED) | 0.005 ppb             |                   |
| 174Yb (KED) | 0.035 ppb             |                   |
| 175Lu (KED) | -0.255 ppb            |                   |
| 205Tl (KED) | 0.012 ppb             |                   |
| 208Pb (KED) | 1.200 ppb             |                   |
| 209Bi (KED) | 164.696 %             |                   |
| 232Th (KED) | 0.244 ppb             |                   |
| 238U (KED)  | 0.046 ppb             |                   |

| Category   | Concentration average | Intensity average | Intensity RSD |
|------------|-----------------------|-------------------|---------------|
| 6Li (KED)  | 267.065 %             | 5,778 cps         |               |
| 9Be (KED)  | 0.039 ppb             | 10 cps            |               |
| 11B (KED)  | -16.270 ppb           | 800 cps           |               |
| 24Mg (KED) | 702.396 ppb           | 761,903 cps       |               |
| 27Al (KED) | 777.818 ppb           | 257,664 cps       |               |

# Comprehensive

10/9/2021 4:31:46 PM

| Category    | Concentration average | Intensity average | Intensity RSD |
|-------------|-----------------------|-------------------|---------------|
| 45Sc (KED)  | 274.605 %             | 125,320 cps       |               |
| 51V (KED)   | 1.410 ppb             | 22,848 cps        |               |
| 52Cr (KED)  | 3.317 ppb             | 80,250 cps        |               |
| 55Mn (KED)  | 22.093 ppb            | 301,297 cps       |               |
| 56Fe (KED)  | 771.655 ppb           | 17,387,975 cps    |               |
| 58Ni (KED)  | 3.586 ppb             | 97,207 cps        |               |
| 59Co (KED)  | 0.335 ppb             | 15,216 cps        |               |
| 63Cu (KED)  | 9.871 ppb             | 283,440 cps       |               |
| 64Zn (KED)  | 157.443 ppb           | 1,231,093 cps     |               |
| 69Ga (KED)  | 2.433 ppb             | 29,197 cps        |               |
| 75As (KED)  | 0.365 ppb             | 953 cps           |               |
| 80Se (KED)  | 1.507 ppb             | 5,321 cps         |               |
| 85Rb (KED)  | 4.596 ppb             | 53,983 cps        |               |
| 88Sr (KED)  | 9.896 ppb             | 172,284 cps       |               |
| 89Y (KED)   | 237.115 %             | 993,976 cps       |               |
| 107Ag (KED) | 0.018 ppb             | 1,213 cps         |               |
| 114Cd (KED) | 0.044 ppb             | 1,183 cps         |               |
| 115In (KED) | 205.941 %             | 1,553,002 cps     |               |
| 133Cs (KED) | 0.142 ppb             | 6,959 cps         |               |
| 138Ba (KED) | 10.405 ppb            | 632,243 cps       |               |
| 139La (KED) | 0.807 ppb             | 95,888 cps        |               |
| 140Ce (KED) | 1.706 ppb             | 257,243 cps       |               |
| 141Pr (KED) | 0.202 ppb             | 32,837 cps        |               |
| 142Nd (KED) | 1.042 ppb             | 67,080 cps        |               |
| 152Sm (KED) | 0.146 ppb             | 8,476 cps         |               |
| 153Eu (KED) | 0.030 ppb             | 3,504 cps         |               |
| 158Gd (KED) | 0.123 ppb             | 8,947 cps         |               |
| 159Tb (KED) | 208.906 %             | 6,649,550 cps     |               |
| 164Dy (KED) | 0.088 ppb             | 7,282 cps         |               |
| 166Er (KED) | 0.038 ppb             | 4,661 cps         |               |
| 169Tm (KED) | 0.005 ppb             | 1,883 cps         |               |
| 174Yb (KED) | 0.035 ppb             | 4,027 cps         |               |
| 175Lu (KED) | -0.255 ppb            | 31,677 cps        |               |
| 205Tl (KED) | 0.012 ppb             | 2,230 cps         |               |
| 208Pb (KED) | 1.200 ppb             | 168,027 cps       |               |
| 209Bi (KED) | 164.696 %             | 4,594,739 cps     |               |
| 232Th (KED) | 0.244 ppb             | 63,592 cps        |               |
| 238U (KED)  | 0.046 ppb             | 13,941 cps        |               |
