# Supplementary material for: Geographic and breed-specific traceability of cashmere via mineral element profiling in Inner Mongolia (Ordos, Chifeng, and Alxa League)
Source: Royal Society of Chemistry journal article supplement (doi:10.1039/d5ra08122j), 2026-01-01
Supplement: d5ra08122j1.zip [file 20211012-min gai(1-24).pdf › ԭʼ޿/20211012-min gai(1-24).pdf]

## Instrument Summary:

Instrument ID: iCAP Q  
Serial Number: Undefined

## Labbook Summary:

Path and filename: \_Application Data\Workspace\LabBooks\wlw\20211012-1.imexp  
Labbook created by: Administrator  
Based on template:  
Hardware configuration: iCAPQ1  
Labbook type: eQuant  
Qtegra version (last saved): 2.7.2425.154  
Labbook started: 10/12/2021 2:49:54 PM  
Labbook finished: 10/12/2021 4:47:52 PM

## Method Summary:

| Isotope     | Mode | Dwell time (s) | # of Channels | Spacing | Resolution | IS          |
|-------------|------|----------------|---------------|---------|------------|-------------|
| 6Li (KED)   | KED  | 0.03           | 3             | 0.1     | Normal     |             |
| 9Be (KED)   | KED  | 0.03           | 3             | 0.1     | Normal     | 6Li (KED)   |
| 11B (KED)   | KED  | 0.03           | 3             | 0.1     | Normal     | 6Li (KED)   |
| 24Mg (KED)  | KED  | 0.03           | 3             | 0.1     | Normal     | 6Li (KED)   |
| 27Al (KED)  | KED  | 0.03           | 3             | 0.1     | Normal     | 45Sc (KED)  |
| 45Sc (KED)  | KED  | 0.03           | 3             | 0.1     | Normal     |             |
| 51V (KED)   | KED  | 0.03           | 3             | 0.1     | Normal     | 45Sc (KED)  |
| 52Cr (KED)  | KED  | 0.03           | 3             | 0.1     | Normal     | 45Sc (KED)  |
| 55Mn (KED)  | KED  | 0.03           | 3             | 0.1     | Normal     | 45Sc (KED)  |
| 56Fe (KED)  | KED  | 0.03           | 3             | 0.1     | Normal     | 45Sc (KED)  |
| 58Ni (KED)  | KED  | 0.03           | 3             | 0.1     | Normal     | 45Sc (KED)  |
| 59Co (KED)  | KED  | 0.03           | 3             | 0.1     | Normal     | 45Sc (KED)  |
| 63Cu (KED)  | KED  | 0.03           | 3             | 0.1     | Normal     | 89Y (KED)   |
| 64Zn (KED)  | KED  | 0.03           | 3             | 0.1     | Normal     | 89Y (KED)   |
| 69Ga (KED)  | KED  | 0.03           | 3             | 0.1     | Normal     | 89Y (KED)   |
| 75As (KED)  | KED  | 0.03           | 3             | 0.1     | Normal     | 89Y (KED)   |
| 80Se (KED)  | KED  | 0.03           | 3             | 0.1     | Normal     | 89Y (KED)   |
| 85Rb (KED)  | KED  | 0.03           | 3             | 0.1     | Normal     | 89Y (KED)   |
| 88Sr (KED)  | KED  | 0.03           | 3             | 0.1     | Normal     | 89Y (KED)   |
| 89Y (KED)   | KED  | 0.03           | 3             | 0.1     | Normal     |             |
| 107Ag (KED) | KED  | 0.03           | 3             | 0.1     | Normal     | 115In (KED) |
| 114Cd (KED) | KED  | 0.03           | 3             | 0.1     | Normal     | 115In (KED) |
| 115In (KED) | KED  | 0.03           | 3             | 0.1     | Normal     |             |
| 133Cs (KED) | KED  | 0.03           | 3             | 0.1     | Normal     | 115In (KED) |
| 138Ba (KED) | KED  | 0.03           | 3             | 0.1     | Normal     | 159Tb (KED) |
| 139La (KED) | KED  | 0.03           | 3             | 0.1     | Normal     | 159Tb (KED) |
| 140Ce (KED) | KED  | 0.03           | 3             | 0.1     | Normal     | 159Tb (KED) |
| 141Pr (KED) | KED  | 0.03           | 3             | 0.1     | Normal     | 159Tb (KED) |
| 142Nd (KED) | KED  | 0.03           | 3             | 0.1     | Normal     | 159Tb (KED) |
| 152Sm (KED) | KED  | 0.03           | 3             | 0.1     | Normal     | 159Tb (KED) |
| 153Eu (KED) | KED  | 0.03           | 3             | 0.1     | Normal     | 159Tb (KED) |
| 158Gd (KED) | KED  | 0.03           | 3             | 0.1     | Normal     | 159Tb (KED) |
| 159Tb (KED) | KED  | 0.03           | 3             | 0.1     | Normal     |             |
| 164Dy (KED) | KED  | 0.03           | 3             | 0.1     | Normal     | 159Tb (KED) |
| 166Er (KED) | KED  | 0.03           | 3             | 0.1     | Normal     | 159Tb (KED) |
| 169Tm (KED) | KED  | 0.03           | 3             | 0.1     | Normal     | 159Tb (KED) |
| 174Yb (KED) | KED  | 0.03           | 3             | 0.1     | Normal     | 159Tb (KED) |
| 175Lu (KED) | KED  | 0.03           | 3             | 0.1     | Normal     | 159Tb (KED) |
| 205Tl (KED) | KED  | 0.03           | 3             | 0.1     | Normal     | 209Bi (KED) |
| 208Pb (KED) | KED  | 0.03           | 3             | 0.1     | Normal     | 209Bi (KED) |
| 209Bi (KED) | KED  | 0.03           | 3             | 0.1     | Normal     |             |
| 232Th (KED) | KED  | 0.03           | 3             | 0.1     | Normal     | 209Bi (KED) |
| 238U (KED)  | KED  | 0.03           | 3             | 0.1     | Normal     | 209Bi (KED) |

| Isotope     | Mode | Dwell time (s) | # of Channels | Spacing | Resolution |
|-------------|------|----------------|---------------|---------|------------|
| 6Li (KED)   | KED  | 0.03           | 3             | 0.1     | Normal     |
| 45Sc (KED)  | KED  | 0.03           | 3             | 0.1     | Normal     |
| 89Y (KED)   | KED  | 0.03           | 3             | 0.1     | Normal     |
| 115In (KED) | KED  | 0.03           | 3             | 0.1     | Normal     |
| 159Tb (KED) | KED  | 0.03           | 3             | 0.1     | Normal     |
| 209Bi (KED) | KED  | 0.03           | 3             | 0.1     | Normal     |

| No. of sweeps | Time per sweep[s] | Time per main run[s] |
|---------------|-------------------|----------------------|
| 10            | 3.87              | 38.7                 |

## Calibration Curves:

9Be (KED)

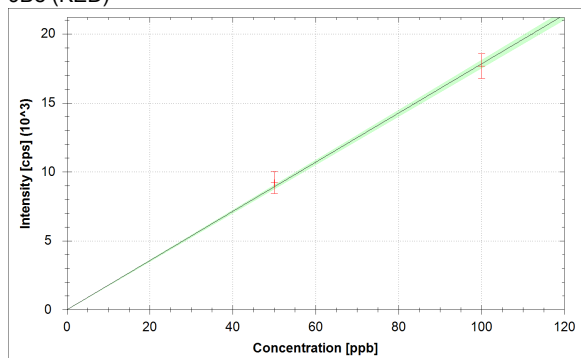

$$f(x) = 178.1816 \cdot x + 1.1057$$

$$R^2 = 0.9995$$

$$\text{BEC} = 0.006 \text{ ppb}$$

$$\text{LoD} = 0.0000 \text{ ppb}$$

11B (KED)

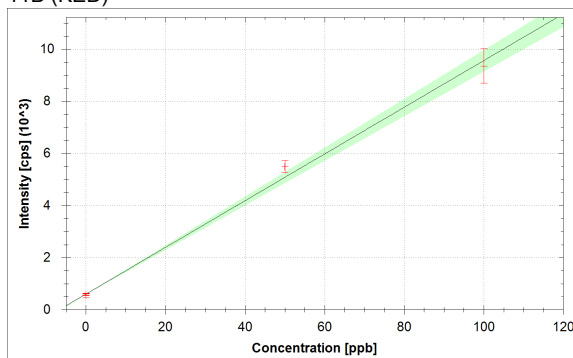

$$f(x) = 89.6828 \cdot x + 598.2650$$

$$R^2 = 0.9959$$

$$\text{BEC} = 6.671 \text{ ppb}$$

$$\text{LoD} = 2.6956 \text{ ppb}$$

24Mg (KED)

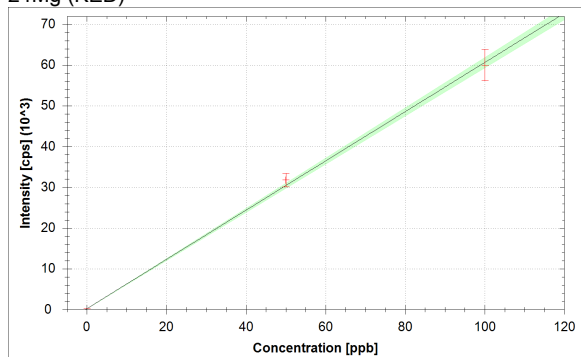

$$f(x) = 603.9193 \cdot x + 225.2158$$

$$R^2 = 0.9991$$

$$\text{BEC} = 0.373 \text{ ppb}$$

$$\text{LoD} = 0.1755 \text{ ppb}$$

27Al (KED)

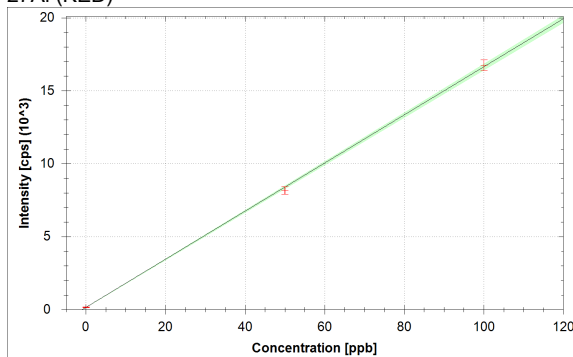

$$f(x) = 164.8650 \cdot x + 149.6967$$

$$R^2 = 0.9997$$

$$\text{BEC} = 0.908 \text{ ppb}$$

$$\text{LoD} = 0.2870 \text{ ppb}$$

51V (KED)

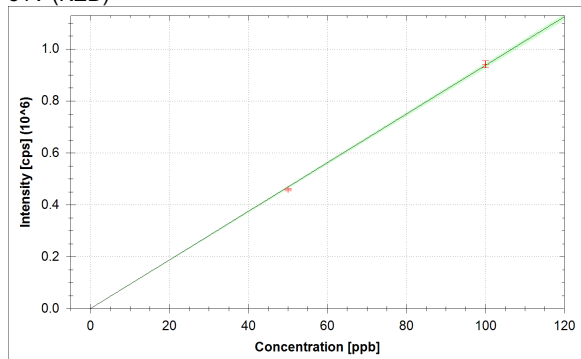

$$f(x) = 9365.5808 \cdot x + 33.0270$$

$$R^2 = 0.9998$$

$$\text{BEC} = 0.004 \text{ ppb}$$

$$\text{LoD} = 0.0016 \text{ ppb}$$

52Cr (KED)

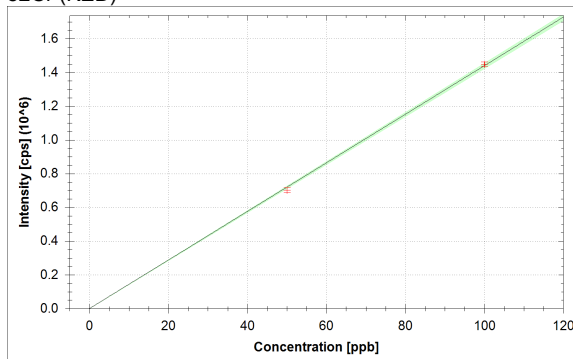

$$f(x) = 14397.2869 \cdot x + 141.3003$$

$$R^2 = 0.9997$$

$$\text{BEC} = 0.010 \text{ ppb}$$

$$\text{LoD} = 0.0005 \text{ ppb}$$

55Mn (KED)

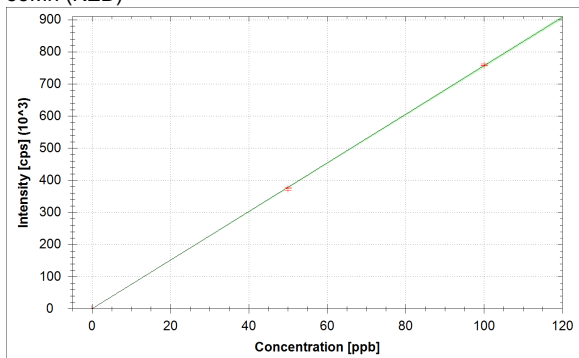

$$f(x) = 7561.7415 \cdot x + 96.3071$$

$$R^2 = 0.9999$$

$$\text{BEC} = 0.013 \text{ ppb}$$

$$\text{LoD} = 0.0076 \text{ ppb}$$

56Fe (KED)

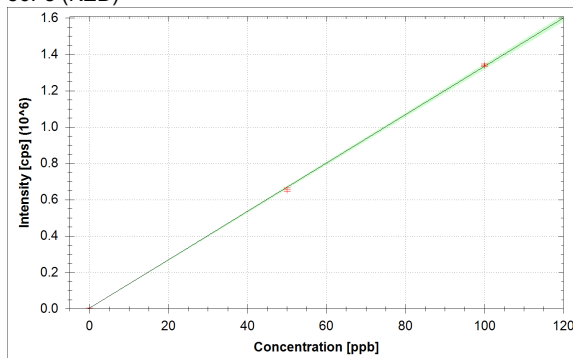

$$f(x) = 13303.4257 \cdot x + 3286.4174$$

$$R^2 = 0.9998$$

$$\text{BEC} = 0.247 \text{ ppb}$$

$$\text{LoD} = 0.0153 \text{ ppb}$$

58Ni (KED)

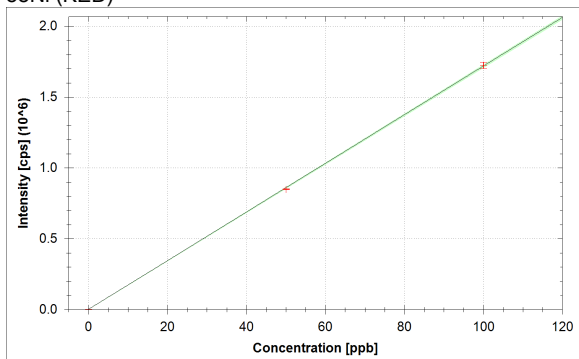

$$f(x) = 17176.2069 \cdot x + 1682.6768$$

$$R^2 = 0.9999$$

$$\text{BEC} = 0.098 \text{ ppb}$$

$$\text{LoD} = 0.0223 \text{ ppb}$$

59Co (KED)

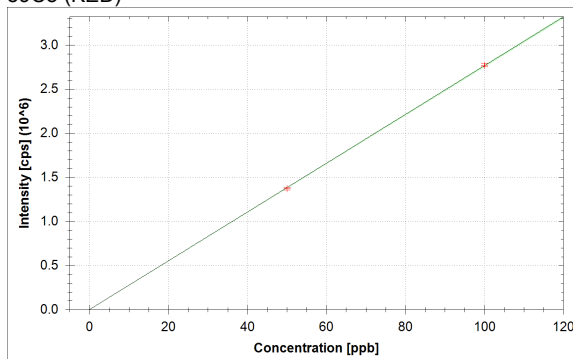

$$f(x) = 27650.6852 \cdot x + 128.1389$$

$$R^2 = 1.0000$$

$$\text{BEC} = 0.005 \text{ ppb}$$

$$\text{LoD} = 0.0017 \text{ ppb}$$

63Cu (KED)

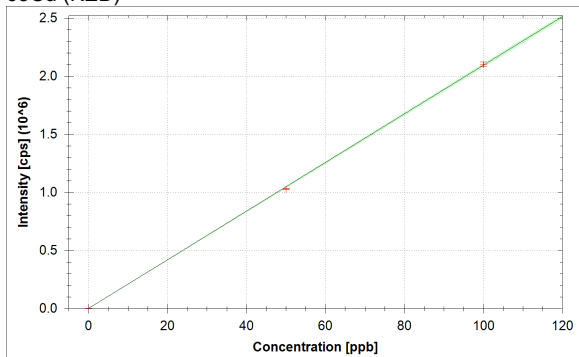

$$f(x) = 20937.4177 \cdot x + 969.3908$$

$$R^2 = 0.9999$$

$$\text{BEC} = 0.046 \text{ ppb}$$

$$\text{LoD} = 0.0119 \text{ ppb}$$

64Zn (KED)

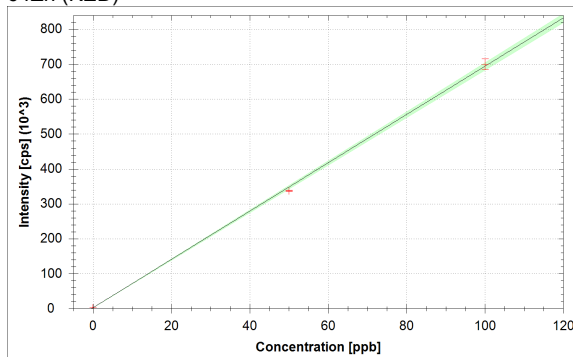

$$f(x) = 6915.5904 \cdot x + 2556.7146$$

$$R^2 = 0.9995$$

$$\text{BEC} = 0.370 \text{ ppb}$$

$$\text{LoD} = 0.0583 \text{ ppb}$$

69Ga (KED)

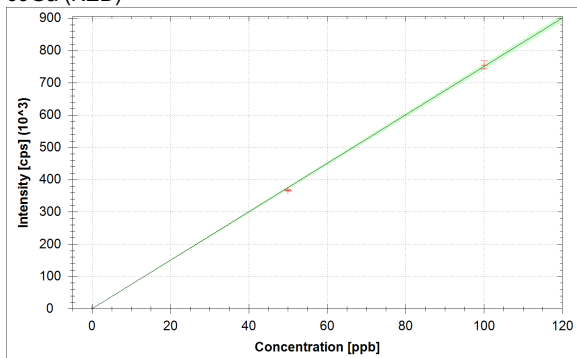

$$f(x) = 7502.6338 \cdot x + 113.0320$$

$$R^2 = 0.9998$$

$$\text{BEC} = 0.015 \text{ ppb}$$

$$\text{LoD} = 0.0058 \text{ ppb}$$

75As (KED)

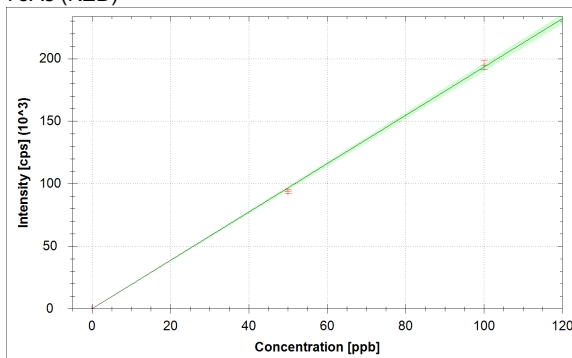

$$f(x) = 1932.3252 \cdot x + 9.6988$$

$$R^2 = 0.9995$$

$$\text{BEC} = 0.005 \text{ ppb}$$

$$\text{LoD} = 0.0001 \text{ ppb}$$

80Se (KED)

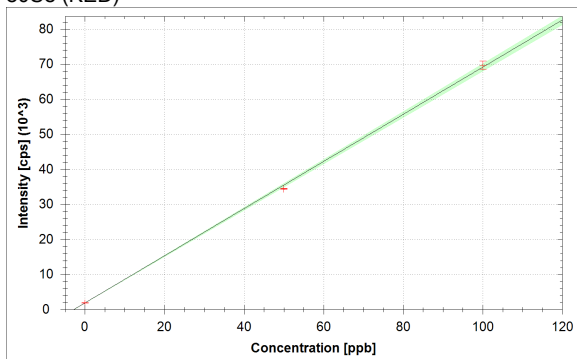

$$f(x) = 672.6231 \cdot x + 1888.9776$$

$$R^2 = 0.9995$$

$$\text{BEC} = 2.808 \text{ ppb}$$

$$\text{LoD} = 0.2617 \text{ ppb}$$

85Rb (KED)

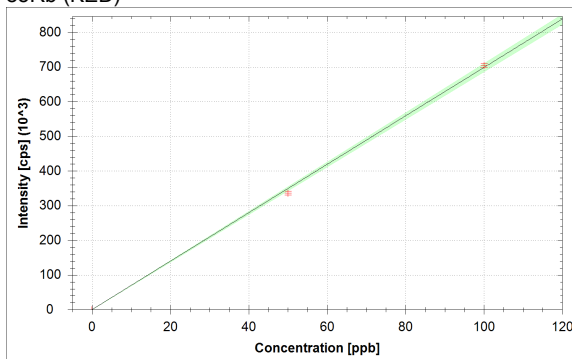

$$f(x) = 6986.8463 \cdot x + 25.9215$$

$$R^2 = 0.9994$$

$$\text{BEC} = 0.004 \text{ ppb}$$

$$\text{LoD} = 0.0066 \text{ ppb}$$

88Sr (KED)

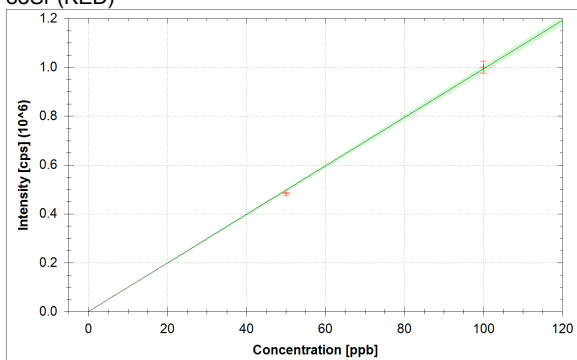

$$f(x) = 9926.7355 \cdot x + 217.7835$$

$$R^2 = 0.9996$$

$$\text{BEC} = 0.022 \text{ ppb}$$

$$\text{LoD} = 0.0081 \text{ ppb}$$

107Ag (KED)

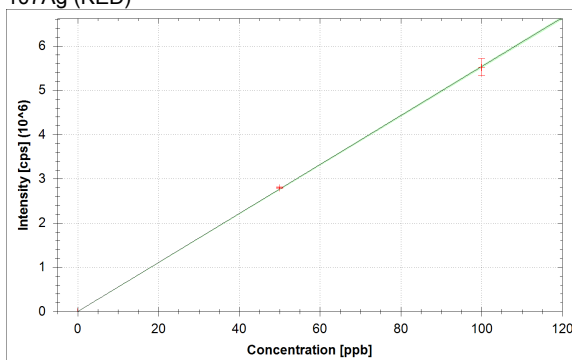

$$f(x) = 55343.1364 \cdot x + 727.3203$$

$$R^2 = 0.9999$$

$$\text{BEC} = 0.013 \text{ ppb}$$

$$\text{LoD} = 0.0004 \text{ ppb}$$

114Cd (KED)

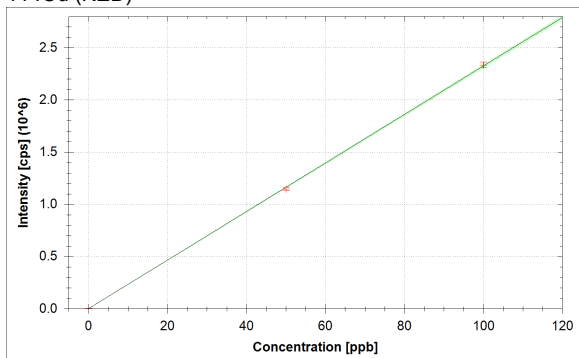

$$f(x) = 23232.2201 \cdot x + 775.1395$$

$$R^2 = 0.9999$$

$$\text{BEC} = 0.033 \text{ ppb}$$

$$\text{LoD} = 0.0090 \text{ ppb}$$

133Cs (KED)

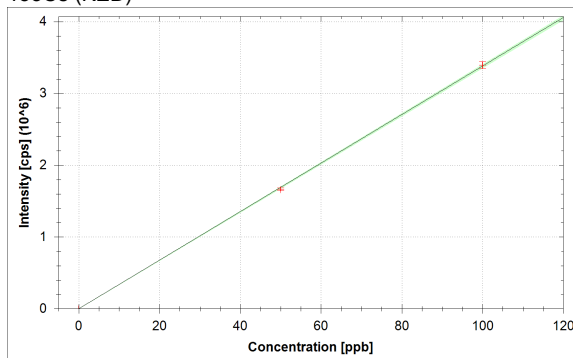

$$f(x) = 33816.6844 \cdot x + 179.8751$$

$$R^2 = 0.9999$$

$$\text{BEC} = 0.005 \text{ ppb}$$

$$\text{LoD} = 0.0006 \text{ ppb}$$

138Ba (KED)

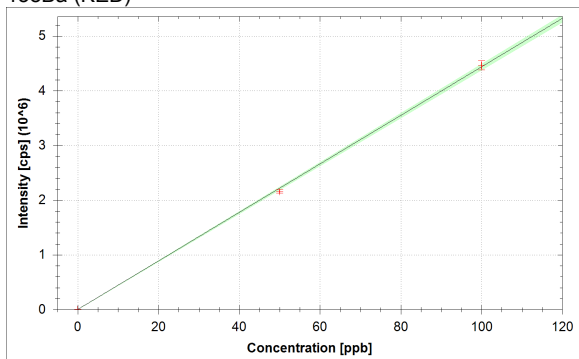

$$f(x) = 44349.9845 \cdot x + 1833.2376$$

$$R^2 = 0.9997$$

$$\text{BEC} = 0.041 \text{ ppb}$$

$$\text{LoD} = 0.0032 \text{ ppb}$$

139La (KED)

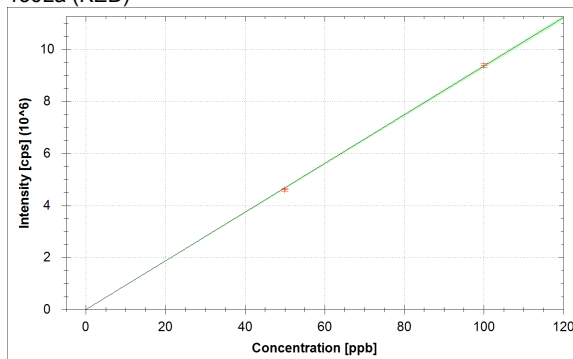

$$f(x) = 93575.6957 \cdot x + 341.2806$$

$$R^2 = 0.9999$$

$$\text{BEC} = 0.004 \text{ ppb}$$

$$\text{LoD} = 0.0007 \text{ ppb}$$

140Ce (KED)

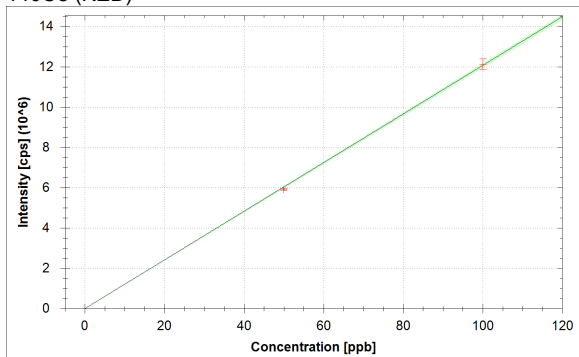

$$f(x) = 120723.1653 \cdot x + 470.5383$$

$$R^2 = 0.9998$$

$$\text{BEC} = 0.004 \text{ ppb}$$

$$\text{LoD} = 0.0001 \text{ ppb}$$

141Pr (KED)

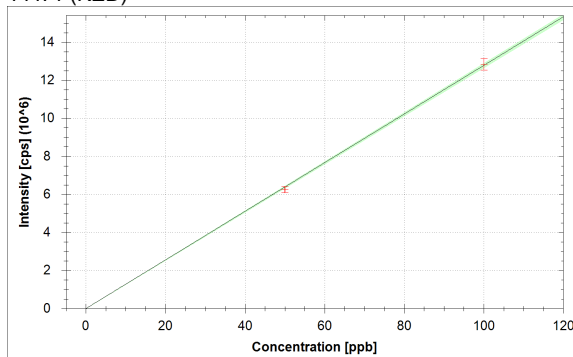

$$f(x) = 127743.8391 \cdot x + 356.2648$$

$$R^2 = 0.9998$$

$$\text{BEC} = 0.003 \text{ ppb}$$

$$\text{LoD} = 0.0004 \text{ ppb}$$

142Nd (KED)

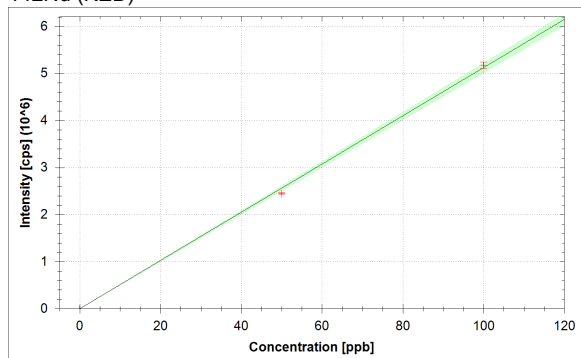

$$f(x) = 51221.8071 \cdot x + 162.6553$$

$$R^2 = 0.9992$$

$$\text{BEC} = 0.003 \text{ ppb}$$

$$\text{LoD} = 0.0002 \text{ ppb}$$

152Sm (KED)

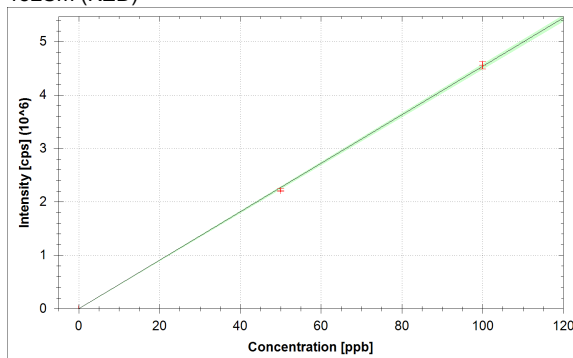

$$f(x) = 45334.5227 \cdot x + 99.4183$$

$$R^2 = 0.9998$$

$$\text{BEC} = 0.002 \text{ ppb}$$

$$\text{LoD} = 0.0005 \text{ ppb}$$

153Eu (KED)

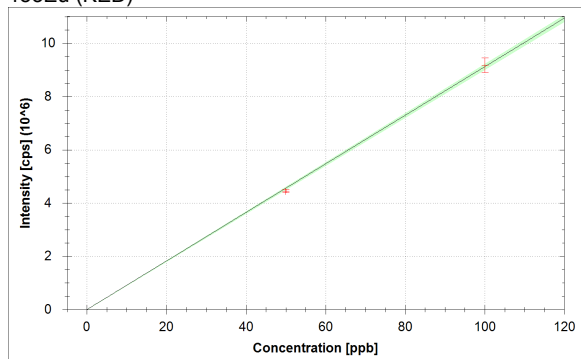

$$f(x) = 91224.4831 \cdot x + 199.6119$$

$$R^2 = 0.9997$$

$$\text{BEC} = 0.002 \text{ ppb}$$

$$\text{LoD} = 0.0001 \text{ ppb}$$

158Gd (KED)

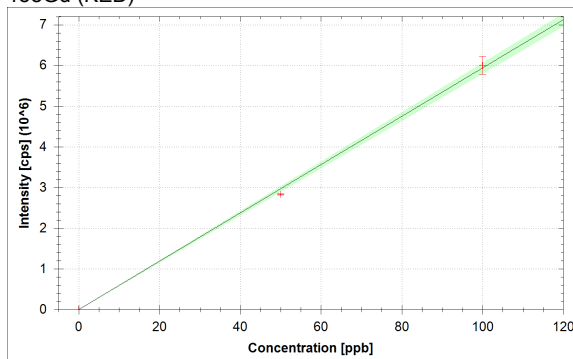

$$f(x) = 59381.6797 \cdot x + 105.9612$$

$$R^2 = 0.9991$$

$$\text{BEC} = 0.002 \text{ ppb}$$

$$\text{LoD} = 0.0004 \text{ ppb}$$

164Dy (KED)

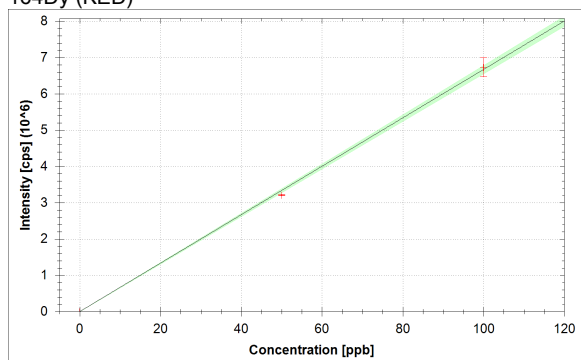

$$f(x) = 66718.4834 \cdot x + 129.8026$$

$$R^2 = 0.9994$$

$$\text{BEC} = 0.002 \text{ ppb}$$

$$\text{LoD} = 0.0007 \text{ ppb}$$

166Er (KED)

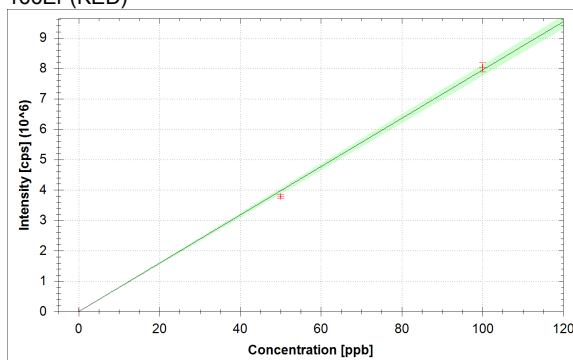

$$f(x) = 79426.9614 \cdot x + 286.8503$$

$$R^2 = 0.9990$$

$$\text{BEC} = 0.004 \text{ ppb}$$

$$\text{LoD} = 0.0008 \text{ ppb}$$

169Tm (KED)

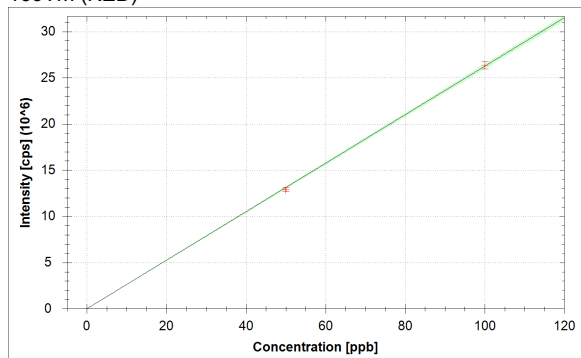

$$f(x) = 262507.3917 \cdot x + 356.2081$$

$$R^2 = 0.9998$$

$$\text{BEC} = 0.001 \text{ ppb}$$

$$\text{LoD} = 0.0001 \text{ ppb}$$

174Yb (KED)

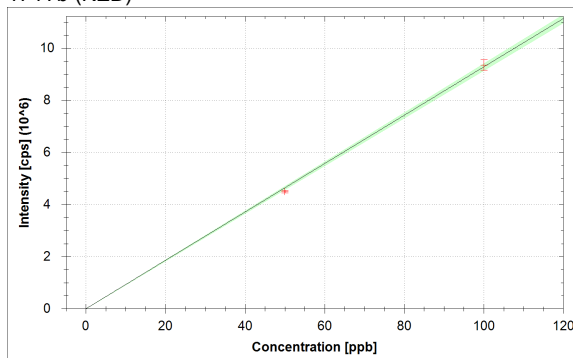

$$f(x) = 92829.2108 \cdot x + 121.0204$$

$$R^2 = 0.9996$$

$$\text{BEC} = 0.001 \text{ ppb}$$

$$\text{LoD} = 0.0002 \text{ ppb}$$

175Lu (KED)

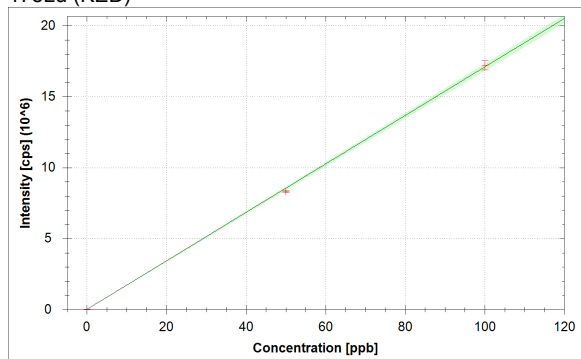

$$f(x) = 170808.4443 \cdot x + 11596.0225$$

$$R^2 = 0.9996$$

$$\text{BEC} = 0.068 \text{ ppb}$$

$$\text{LoD} = 0.0034 \text{ ppb}$$

205Tl (KED)

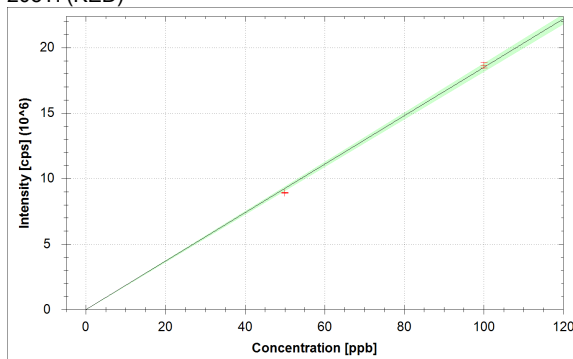

$$f(x) = 184851.3193 \cdot x + 272.2437$$

$$R^2 = 0.9994$$

$$\text{BEC} = 0.001 \text{ ppb}$$

$$\text{LoD} = 0.0001 \text{ ppb}$$

208Pb (KED)

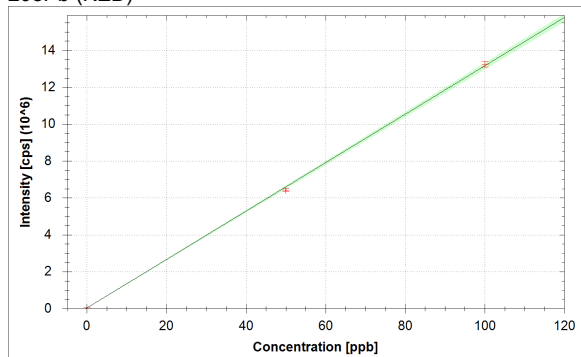

$$f(x) = 131220.8861 \cdot x + 33884.4695$$

$$R^2 = 0.9997$$

$$\text{BEC} = 0.258 \text{ ppb}$$

$$\text{LoD} = 0.0302 \text{ ppb}$$

232Th (KED)

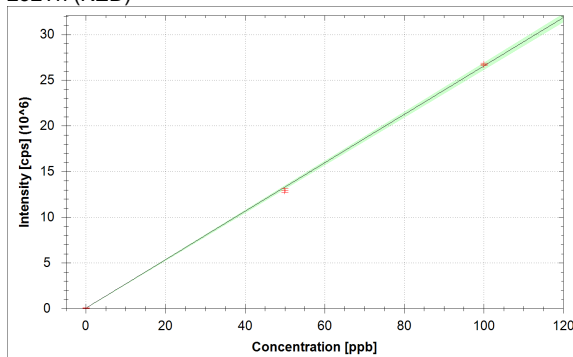

$$f(x) = 264995.0277 \cdot x + 46791.4732$$

$$R^2 = 0.9996$$

$$\text{BEC} = 0.177 \text{ ppb}$$

$$\text{LoD} = 0.0000 \text{ ppb}$$

238U (KED)

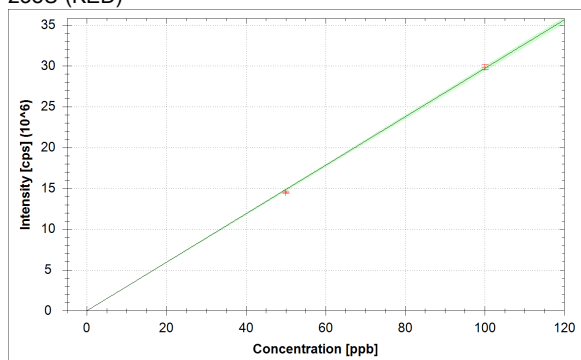

$$f(x) = 297017.1189 \cdot x + 338.7214$$

$$R^2 = 0.9998$$

$$\text{BEC} = 0.001 \text{ ppb}$$

$$\text{LoD} = 0.0002 \text{ ppb}$$

**Standards:**

Analysis Index: 3  
 Analysis Name: 0+10  
 Analysis Type: STD  
 Analysis Started at: 10/12/2021 2:57:11 PM  
 Standard (Stock): std0  
 Standard DF: 1

| Category    | Concentration average | Concentration RSD | Standard Concentration |
|-------------|-----------------------|-------------------|------------------------|
| 6Li (KED)   | 102.595 %             |                   |                        |
| 9Be (KED)   | 0.000 ppb             | 1.7 %             | 0.000 ppb              |
| 11B (KED)   | 0.000 ppb             | 0.1 %             | 0.000 ppb              |
| 24Mg (KED)  | 0.000 ppb             | 0.1 %             | 0.000 ppb              |
| 27Al (KED)  | 0.000 ppb             | 0.2 %             | 0.000 ppb              |
| 45Sc (KED)  | 101.566 %             |                   |                        |
| 51V (KED)   | 0.000 ppb             | 1.5 %             | 0.000 ppb              |
| 52Cr (KED)  | 0.000 ppb             | 0.4 %             | 0.000 ppb              |
| 55Mn (KED)  | 0.000 ppb             | 0.1 %             | 0.000 ppb              |
| 56Fe (KED)  | 0.000 ppb             | 0.0 %             | 0.000 ppb              |
| 58Ni (KED)  | 0.000 ppb             | 0.1 %             | 0.000 ppb              |
| 59Co (KED)  | 0.000 ppb             | 0.2 %             | 0.000 ppb              |
| 63Cu (KED)  | 0.000 ppb             | 0.1 %             | 0.000 ppb              |
| 64Zn (KED)  | 0.000 ppb             | 0.0 %             | 0.000 ppb              |
| 69Ga (KED)  | 0.000 ppb             | 0.3 %             | 0.000 ppb              |
| 75As (KED)  | 0.000 ppb             | 0.3 %             | 0.000 ppb              |
| 80Se (KED)  | 0.000 ppb             | 0.0 %             | 0.000 ppb              |
| 85Rb (KED)  | 0.000 ppb             | 0.3 %             | 0.000 ppb              |
| 88Sr (KED)  | 0.000 ppb             | 0.5 %             | 0.000 ppb              |
| 89Y (KED)   | 103.099 %             |                   |                        |
| 107Ag (KED) | 0.000 ppb             | 1.1 %             | 0.000 ppb              |
| 114Cd (KED) | 0.000 ppb             | 0.3 %             | 0.000 ppb              |
| 115In (KED) | 102.649 %             |                   |                        |
| 133Cs (KED) | 0.000 ppb             | 1.4 %             | 0.000 ppb              |
| 138Ba (KED) | 0.000 ppb             | 0.2 %             | 0.000 ppb              |
| 139La (KED) | 0.000 ppb             | 1.2 %             | 0.000 ppb              |
| 140Ce (KED) | 0.000 ppb             | 1.0 %             | 0.000 ppb              |
| 141Pr (KED) | 0.000 ppb             | 1.1 %             | 0.000 ppb              |
| 142Nd (KED) | 0.000 ppb             | 1.0 %             | 0.000 ppb              |
| 152Sm (KED) | 0.000 ppb             | 1.1 %             | 0.000 ppb              |
| 153Eu (KED) | 0.000 ppb             | 0.9 %             | 0.000 ppb              |
| 158Gd (KED) | 0.000 ppb             | 1.1 %             | 0.000 ppb              |
| 159Tb (KED) | 102.553 %             |                   |                        |
| 164Dy (KED) | 0.000 ppb             | 0.9 %             | 0.000 ppb              |
| 166Er (KED) | 0.000 ppb             | 0.4 %             | 0.000 ppb              |
| 169Tm (KED) | 0.000 ppb             | 0.7 %             | 0.000 ppb              |
| 174Yb (KED) | 0.000 ppb             | 0.8 %             | 0.000 ppb              |
| 175Lu (KED) | 0.000 ppb             | 0.1 %             | 0.000 ppb              |
| 205Tl (KED) | 0.000 ppb             | 0.6 %             | 0.000 ppb              |
| 208Pb (KED) | 0.000 ppb             | 0.0 %             | 0.000 ppb              |
| 209Bi (KED) | 102.185 %             |                   |                        |
| 232Th (KED) | 0.000 ppb             | 0.5 %             | 0.000 ppb              |
| 238U (KED)  | 0.000 ppb             | 0.7 %             | 0.000 ppb              |

**Standards:**

Analysis Index: 4  
 Analysis Name: 50+10  
 Analysis Type: STD  
 Analysis Started at: 10/12/2021 3:02:29 PM  
 Standard (Stock): std1  
 Standard DF: 1

| Category    | Concentration average | Concentration RSD | Standard Concentration |
|-------------|-----------------------|-------------------|------------------------|
| 6Li (KED)   | 99.189 %              |                   |                        |
| 9Be (KED)   | 51.724 ppb            | 8.7 %             | 50.000 ppb             |
| 11B (KED)   | 54.692 ppb            | 4.9 %             | 50.000 ppb             |
| 24Mg (KED)  | 52.236 ppb            | 5.2 %             | 50.000 ppb             |
| 27Al (KED)  | 48.659 ppb            | 3.3 %             | 50.000 ppb             |
| 45Sc (KED)  | 109.468 %             |                   |                        |
| 51V (KED)   | 49.002 ppb            | 1.1 %             | 50.000 ppb             |
| 52Cr (KED)  | 48.795 ppb            | 2.1 %             | 50.000 ppb             |
| 55Mn (KED)  | 49.376 ppb            | 1.2 %             | 50.000 ppb             |
| 56Fe (KED)  | 48.912 ppb            | 1.6 %             | 50.000 ppb             |
| 58Ni (KED)  | 49.332 ppb            | 0.4 %             | 50.000 ppb             |
| 59Co (KED)  | 49.595 ppb            | 1.0 %             | 50.000 ppb             |
| 63Cu (KED)  | 49.181 ppb            | 0.4 %             | 50.000 ppb             |
| 64Zn (KED)  | 48.350 ppb            | 0.7 %             | 50.000 ppb             |
| 69Ga (KED)  | 48.825 ppb            | 0.4 %             | 50.000 ppb             |
| 75As (KED)  | 48.364 ppb            | 1.6 %             | 50.000 ppb             |
| 80Se (KED)  | 48.341 ppb            | 0.4 %             | 50.000 ppb             |
| 85Rb (KED)  | 48.161 ppb            | 1.7 %             | 50.000 ppb             |
| 88Sr (KED)  | 48.581 ppb            | 1.1 %             | 50.000 ppb             |
| 89Y (KED)   | 110.964 %             |                   |                        |
| 107Ag (KED) | 50.527 ppb            | 0.6 %             | 50.000 ppb             |
| 114Cd (KED) | 49.250 ppb            | 1.3 %             | 50.000 ppb             |
| 115In (KED) | 109.028 %             |                   |                        |
| 133Cs (KED) | 49.198 ppb            | 1.2 %             | 50.000 ppb             |
| 138Ba (KED) | 48.664 ppb            | 1.6 %             | 50.000 ppb             |
| 139La (KED) | 49.225 ppb            | 1.2 %             | 50.000 ppb             |
| 140Ce (KED) | 49.072 ppb            | 1.0 %             | 50.000 ppb             |
| 141Pr (KED) | 49.009 ppb            | 2.4 %             | 50.000 ppb             |
| 142Nd (KED) | 47.867 ppb            | 0.8 %             | 50.000 ppb             |
| 152Sm (KED) | 48.889 ppb            | 1.3 %             | 50.000 ppb             |
| 153Eu (KED) | 48.776 ppb            | 1.5 %             | 50.000 ppb             |
| 158Gd (KED) | 47.704 ppb            | 0.7 %             | 50.000 ppb             |
| 159Tb (KED) | 109.314 %             |                   |                        |
| 164Dy (KED) | 48.155 ppb            | 0.6 %             | 50.000 ppb             |
| 166Er (KED) | 47.684 ppb            | 1.5 %             | 50.000 ppb             |
| 169Tm (KED) | 49.065 ppb            | 1.7 %             | 50.000 ppb             |
| 174Yb (KED) | 48.471 ppb            | 1.1 %             | 50.000 ppb             |
| 175Lu (KED) | 48.576 ppb            | 1.0 %             | 50.000 ppb             |
| 205Tl (KED) | 48.210 ppb            | 0.6 %             | 50.000 ppb             |
| 208Pb (KED) | 48.672 ppb            | 1.1 %             | 50.000 ppb             |
| 209Bi (KED) | 108.396 %             |                   |                        |
| 232Th (KED) | 48.508 ppb            | 1.6 %             | 50.000 ppb             |
| 238U (KED)  | 48.934 ppb            | 1.0 %             | 50.000 ppb             |

**Standards:**

Analysis Index: 5  
 Analysis Name: 100+10  
 Analysis Type: STD  
 Analysis Started at: 10/12/2021 3:06:31 PM  
 Standard (Stock): std2  
 Standard DF: 1

| Category    | Concentration average | Concentration RSD | Standard Concentration |
|-------------|-----------------------|-------------------|------------------------|
| 6Li (KED)   | 103.082 %             |                   |                        |
| 9Be (KED)   | 99.138 ppb            | 5.1 %             | 100.000 ppb            |
| 11B (KED)   | 97.654 ppb            | 7.6 %             | 100.000 ppb            |
| 24Mg (KED)  | 98.882 ppb            | 6.4 %             | 100.000 ppb            |
| 27Al (KED)  | 100.670 ppb           | 2.2 %             | 100.000 ppb            |
| 45Sc (KED)  | 107.244 %             |                   |                        |
| 51V (KED)   | 100.499 ppb           | 1.4 %             | 100.000 ppb            |
| 52Cr (KED)  | 100.602 ppb           | 0.9 %             | 100.000 ppb            |
| 55Mn (KED)  | 100.312 ppb           | 0.4 %             | 100.000 ppb            |
| 56Fe (KED)  | 100.544 ppb           | 0.5 %             | 100.000 ppb            |
| 58Ni (KED)  | 100.334 ppb           | 1.2 %             | 100.000 ppb            |
| 59Co (KED)  | 100.202 ppb           | 0.7 %             | 100.000 ppb            |
| 63Cu (KED)  | 100.410 ppb           | 1.0 %             | 100.000 ppb            |
| 64Zn (KED)  | 100.825 ppb           | 2.2 %             | 100.000 ppb            |
| 69Ga (KED)  | 100.587 ppb           | 1.7 %             | 100.000 ppb            |
| 75As (KED)  | 100.818 ppb           | 2.0 %             | 100.000 ppb            |
| 80Se (KED)  | 100.829 ppb           | 1.7 %             | 100.000 ppb            |
| 85Rb (KED)  | 100.920 ppb           | 0.8 %             | 100.000 ppb            |
| 88Sr (KED)  | 100.709 ppb           | 2.4 %             | 100.000 ppb            |
| 89Y (KED)   | 106.951 %             |                   |                        |
| 107Ag (KED) | 99.737 ppb            | 3.6 %             | 100.000 ppb            |
| 114Cd (KED) | 100.375 ppb           | 1.2 %             | 100.000 ppb            |
| 115In (KED) | 105.990 %             |                   |                        |
| 133Cs (KED) | 100.401 ppb           | 1.4 %             | 100.000 ppb            |
| 138Ba (KED) | 100.668 ppb           | 1.9 %             | 100.000 ppb            |
| 139La (KED) | 100.388 ppb           | 0.8 %             | 100.000 ppb            |
| 140Ce (KED) | 100.464 ppb           | 2.3 %             | 100.000 ppb            |
| 141Pr (KED) | 100.495 ppb           | 2.4 %             | 100.000 ppb            |
| 142Nd (KED) | 101.066 ppb           | 1.3 %             | 100.000 ppb            |
| 152Sm (KED) | 100.556 ppb           | 1.6 %             | 100.000 ppb            |
| 153Eu (KED) | 100.612 ppb           | 3.0 %             | 100.000 ppb            |
| 158Gd (KED) | 101.148 ppb           | 3.6 %             | 100.000 ppb            |
| 159Tb (KED) | 107.484 %             |                   |                        |
| 164Dy (KED) | 100.922 ppb           | 3.9 %             | 100.000 ppb            |
| 166Er (KED) | 101.158 ppb           | 1.9 %             | 100.000 ppb            |
| 169Tm (KED) | 100.467 ppb           | 1.6 %             | 100.000 ppb            |
| 174Yb (KED) | 100.765 ppb           | 2.1 %             | 100.000 ppb            |
| 175Lu (KED) | 100.712 ppb           | 1.9 %             | 100.000 ppb            |
| 205Tl (KED) | 100.895 ppb           | 1.2 %             | 100.000 ppb            |
| 208Pb (KED) | 100.664 ppb           | 1.1 %             | 100.000 ppb            |
| 209Bi (KED) | 106.032 %             |                   |                        |
| 232Th (KED) | 100.746 ppb           | 0.5 %             | 100.000 ppb            |
| 238U (KED)  | 100.533 ppb           | 1.0 %             | 100.000 ppb            |

## Sample List Summary:

Instrument ID: iCAP Q

| Index: | Label:    | Main<br>Runs: | Survey<br>Runs: | Start Time:           | User name:                    |
|--------|-----------|---------------|-----------------|-----------------------|-------------------------------|
| 1      | water     | 3             | 0               | 10/12/2021 2:50:00 PM | WINDOWS-UPCI4ER\Administrator |
| 2      | blk       | 3             | 0               | 10/12/2021 2:53:03 PM | WINDOWS-UPCI4ER\Administrator |
| 3      | 0+10      | 3             | 0               | 10/12/2021 2:57:11 PM | WINDOWS-UPCI4ER\Administrator |
| 4      | 50+10     | 3             | 0               | 10/12/2021 3:02:29 PM | WINDOWS-UPCI4ER\Administrator |
| 5      | 100+10    | 3             | 0               | 10/12/2021 3:06:31 PM | WINDOWS-UPCI4ER\Administrator |
| 6      | 20ti      | 3             | 0               | 10/12/2021 3:10:20 PM | WINDOWS-UPCI4ER\Administrator |
| 7      | w7ti      | 3             | 0               | 10/12/2021 3:14:12 PM | WINDOWS-UPCI4ER\Administrator |
| 8      | 27ti      | 3             | 0               | 10/12/2021 3:18:47 PM | WINDOWS-UPCI4ER\Administrator |
| 9      | 00089ti   | 3             | 0               | 10/12/2021 3:23:07 PM | WINDOWS-UPCI4ER\Administrator |
| 10     | 21ti      | 3             | 0               | 10/12/2021 3:27:21 PM | WINDOWS-UPCI4ER\Administrator |
| 11     | 6ti       | 3             | 0               | 10/12/2021 3:31:54 PM | WINDOWS-UPCI4ER\Administrator |
| 12     | 01963ti   | 3             | 0               | 10/12/2021 3:36:13 PM | WINDOWS-UPCI4ER\Administrator |
| 13     | 01965ti   | 3             | 0               | 10/12/2021 3:40:28 PM | WINDOWS-UPCI4ER\Administrator |
| 14     | 1497jian  | 3             | 0               | 10/12/2021 3:44:38 PM | WINDOWS-UPCI4ER\Administrator |
| 15     | 1373jian  | 3             | 0               | 10/12/2021 3:48:23 PM | WINDOWS-UPCI4ER\Administrator |
| 16     | 1481jian  | 3             | 0               | 10/12/2021 3:52:38 PM | WINDOWS-UPCI4ER\Administrator |
| 17     | 81474jian | 3             | 0               | 10/12/2021 3:56:28 PM | WINDOWS-UPCI4ER\Administrator |
| 18     | 2120jian  | 3             | 0               | 10/12/2021 4:00:32 PM | WINDOWS-UPCI4ER\Administrator |
| 19     | 2266jian  | 3             | 0               | 10/12/2021 4:04:33 PM | WINDOWS-UPCI4ER\Administrator |
| 20     | 3865jian  | 3             | 0               | 10/12/2021 4:08:34 PM | WINDOWS-UPCI4ER\Administrator |
| 21     | 3873jian  | 3             | 0               | 10/12/2021 4:12:28 PM | WINDOWS-UPCI4ER\Administrator |
| 22     | 2104jian  | 3             | 0               | 10/12/2021 4:16:31 PM | WINDOWS-UPCI4ER\Administrator |
| 23     | 1486jian  | 3             | 0               | 10/12/2021 4:20:38 PM | WINDOWS-UPCI4ER\Administrator |
| 24     | 1485jian  | 3             | 0               | 10/12/2021 4:24:25 PM | WINDOWS-UPCI4ER\Administrator |
| 25     | 1372jian  | 3             | 0               | 10/12/2021 4:28:16 PM | WINDOWS-UPCI4ER\Administrator |
| 26     | 81482jian | 3             | 0               | 10/12/2021 4:32:01 PM | WINDOWS-UPCI4ER\Administrator |
| 27     | 2013jian  | 3             | 0               | 10/12/2021 4:36:11 PM | WINDOWS-UPCI4ER\Administrator |
| 28     | 2316jian  | 3             | 0               | 10/12/2021 4:39:57 PM | WINDOWS-UPCI4ER\Administrator |
| 29     | 3491jian  | 3             | 0               | 10/12/2021 4:43:56 PM | WINDOWS-UPCI4ER\Administrator |

## Sample Summary

Instrument ID: iCAP Q

Analysis index: 1

Analysis name: water

Analysis started at: 10/12/2021 2:50:00 PM

User name: WINDOWS-UPCI4ER\Administrator

| Category    | Concentration average | Concentration RSD |
|-------------|-----------------------|-------------------|
| 6Li (KED)   | 0.000 %               |                   |
| 11B (KED)   | Infinity ppb          |                   |
| 24Mg (KED)  | Infinity ppb          |                   |
| 27Al (KED)  | 26.744 ppb            | 146.1 %           |
| 45Sc (KED)  | 0.169 %               | 15.6 %            |
| 51V (KED)   | 0.380 ppb             | 86.7 %            |
| 52Cr (KED)  | 1.480 ppb             | 20.8 %            |
| 55Mn (KED)  | 4.787 ppb             | 7.4 %             |
| 56Fe (KED)  | 19.831 ppb            | 10.7 %            |
| 58Ni (KED)  | 67.870 ppb            | 11.1 %            |
| 59Co (KED)  | 0.166 ppb             | 102.2 %           |
| 63Cu (KED)  | Infinity ppb          |                   |
| 64Zn (KED)  | Infinity ppb          |                   |
| 69Ga (KED)  | Infinity ppb          |                   |
| 75As (KED)  | Infinity ppb          |                   |
| 80Se (KED)  | Infinity ppb          |                   |
| 85Rb (KED)  | Infinity ppb          |                   |
| 88Sr (KED)  | Infinity ppb          |                   |
| 89Y (KED)   | 0.001 %               | 100.0 %           |
| 114Cd (KED) | Infinity ppb          |                   |
| 115In (KED) | 0.000 %               | 173.2 %           |
| 138Ba (KED) | Infinity ppb          |                   |
| 142Nd (KED) | Infinity ppb          |                   |
| 159Tb (KED) | 0.000 %               | 173.2 %           |
| 205Tl (KED) | 0.953 ppb             | 45.8 %            |
| 208Pb (KED) | 94.035 ppb            | 18.4 %            |
| 209Bi (KED) | 0.003 %               | 16.7 %            |
| 232Th (KED) | 0.059 ppb             | 350.0 %           |
| 238U (KED)  | 0.764 ppb             | 41.7 %            |

| Category   | Concentration average | Intensity average | Intensity RSD |
|------------|-----------------------|-------------------|---------------|
| 6Li (KED)  | 0.000 %               | 0 cps             |               |
| 9Be (KED)  |                       | 0 cps             |               |
| 11B (KED)  | Infinity ppb          | 41 cps            | 54.0 %        |
| 24Mg (KED) | Infinity ppb          | 161 cps           | 13.1 %        |
| 27Al (KED) | 26.744 ppb            | 7 cps             | 132.3 %       |
| 45Sc (KED) | 0.169 %               | 44 cps            | 15.6 %        |
| 51V (KED)  | 0.380 ppb             | 6 cps             | 69.3 %        |
| 52Cr (KED) | 1.480 ppb             | 36 cps            | 5.4 %         |
| 55Mn (KED) | 4.787 ppb             | 61 cps            | 11.4 %        |
| 56Fe (KED) | 19.831 ppb            | 449 cps           | 11.9 %        |
| 58Ni (KED) | 67.870 ppb            | 1,955 cps         | 5.4 %         |
| 59Co (KED) | 0.166 ppb             | 8 cps             | 107.9 %       |
| 63Cu (KED) | Infinity ppb          | 612 cps           | 3.7 %         |
| 64Zn (KED) | Infinity ppb          | 2,082 cps         | 2.7 %         |
| 69Ga (KED) | Infinity ppb          | 46 cps            | 23.5 %        |
| 75As (KED) | Infinity ppb          | 7 cps             | 50.0 %        |
| 80Se (KED) | Infinity ppb          | 1,867 cps         | 6.5 %         |
| 85Rb (KED) | Infinity ppb          | 40 cps            | 28.9 %        |
| 88Sr (KED) | Infinity ppb          | 88 cps            | 7.9 %         |

| Category    | Concentration average | Intensity average | Intensity RSD |
|-------------|-----------------------|-------------------|---------------|
| 89Y (KED)   | 0.001 %               | 3 cps             | 100.0 %       |
| 107Ag (KED) |                       | 8 cps             | 89.2 %        |
| 114Cd (KED) | Infinity ppb          | 29 cps            | 53.3 %        |
| 115In (KED) | 0.000 %               | 1 cps             | 173.2 %       |
| 133Cs (KED) |                       | 3 cps             | 100.0 %       |
| 138Ba (KED) | Infinity ppb          | 821 cps           | 3.3 %         |
| 139La (KED) |                       | 2 cps             | 86.6 %        |
| 140Ce (KED) |                       | 1 cps             | 173.2 %       |
| 141Pr (KED) |                       | 1 cps             | 173.2 %       |
| 142Nd (KED) | Infinity ppb          | 2 cps             | 86.6 %        |
| 152Sm (KED) |                       | 0 cps             |               |
| 153Eu (KED) |                       | 1 cps             | 173.2 %       |
| 158Gd (KED) |                       | 0 cps             |               |
| 159Tb (KED) | 0.000 %               | 1 cps             | 173.2 %       |
| 164Dy (KED) |                       | 1 cps             | 173.2 %       |
| 166Er (KED) |                       | 21 cps            | 173.2 %       |
| 169Tm (KED) |                       | 0 cps             |               |
| 174Yb (KED) |                       | 0 cps             |               |
| 175Lu (KED) |                       | 0 cps             |               |
| 205Tl (KED) | 0.953 ppb             | 6 cps             | 34.6 %        |
| 208Pb (KED) | 94.035 ppb            | 402 cps           | 7.8 %         |
| 209Bi (KED) | 0.003 %               | 60 cps            | 16.7 %        |
| 232Th (KED) | 0.059 ppb             | 2 cps             | 86.6 %        |
| 238U (KED)  | 0.764 ppb             | 8 cps             | 49.5 %        |

## Sample Summary

Instrument ID: iCAP Q

Analysis index: 2

Analysis name: blk

Analysis started at: 10/12/2021 2:53:03 PM

User name: WINDOWS-UPCI4ER\Administrator

| Category    | Concentration average | Concentration RSD |
|-------------|-----------------------|-------------------|
| 6Li (KED)   | 100.000 %             |                   |
| 9Be (KED)   | -0.006 ppb            | 0.0 %             |
| 11B (KED)   | -0.631 ppb            | 142.3 %           |
| 24Mg (KED)  | 0.066 ppb             | 88.1 %            |
| 27Al (KED)  | -0.085 ppb            | 113.0 %           |
| 45Sc (KED)  | 100.000 %             |                   |
| 51V (KED)   | -0.003 ppb            | 20.5 %            |
| 52Cr (KED)  | 0.000 ppb             | 72.8 %            |
| 55Mn (KED)  | -0.004 ppb            | 70.5 %            |
| 56Fe (KED)  | 0.022 ppb             | 23.0 %            |
| 58Ni (KED)  | -0.048 ppb            | 15.4 %            |
| 59Co (KED)  | 0.000 ppb             | 436.1 %           |
| 63Cu (KED)  | 0.009 ppb             | 43.8 %            |
| 64Zn (KED)  | 0.048 ppb             | 40.3 %            |
| 69Ga (KED)  | -0.004 ppb            | 48.5 %            |
| 75As (KED)  | -0.002 ppb            | 3.2 %             |
| 80Se (KED)  | -0.042 ppb            | 207.4 %           |
| 85Rb (KED)  | -0.001 ppb            | 415.0 %           |
| 88Sr (KED)  | -0.007 ppb            | 41.0 %            |
| 89Y (KED)   | 100.000 %             |                   |
| 107Ag (KED) | -0.012 ppb            | 1.0 %             |
| 114Cd (KED) | -0.005 ppb            | 59.7 %            |
| 115In (KED) | 100.000 %             |                   |
| 133Cs (KED) | -0.005 ppb            | 4.0 %             |
| 138Ba (KED) | 0.001 ppb             | 99.6 %            |
| 139La (KED) | -0.003 ppb            | 7.7 %             |
| 140Ce (KED) | -0.003 ppb            | 1.2 %             |
| 141Pr (KED) | -0.003 ppb            | 5.8 %             |
| 142Nd (KED) | -0.002 ppb            | 2.9 %             |
| 152Sm (KED) | -0.002 ppb            | 8.4 %             |
| 153Eu (KED) | -0.002 ppb            | 1.9 %             |
| 158Gd (KED) | -0.002 ppb            | 7.8 %             |
| 159Tb (KED) | 100.000 %             |                   |
| 164Dy (KED) | -0.002 ppb            | 15.4 %            |
| 166Er (KED) | -0.001 ppb            | 21.9 %            |
| 169Tm (KED) | -0.001 ppb            | 2.3 %             |
| 174Yb (KED) | -0.001 ppb            | 5.7 %             |
| 175Lu (KED) | 0.010 ppb             | 11.1 %            |
| 205Tl (KED) | -0.001 ppb            | 3.0 %             |
| 208Pb (KED) | -0.002 ppb            | 615.7 %           |
| 209Bi (KED) | 100.000 %             |                   |
| 232Th (KED) | -0.176 ppb            | 0.0 %             |
| 238U (KED)  | -0.001 ppb            | 8.5 %             |

| Category   | Concentration average | Intensity average | Intensity RSD |
|------------|-----------------------|-------------------|---------------|
| 6Li (KED)  | 100.000 %             | 1,370 cps         | 4.6 %         |
| 9Be (KED)  | -0.006 ppb            | 0 cps             |               |
| 11B (KED)  | -0.631 ppb            | 541 cps           | 14.2 %        |
| 24Mg (KED) | 0.066 ppb             | 266 cps           | 14.9 %        |
| 27Al (KED) | -0.085 ppb            | 136 cps           | 9.9 %         |

| Category    | Concentration average | Intensity average | Intensity RSD |
|-------------|-----------------------|-------------------|---------------|
| 45Sc (KED)  | 100.000 %             | 26,240 cps        | 1.7 %         |
| 51V (KED)   | -0.003 ppb            | 9 cps             | 57.3 %        |
| 52Cr (KED)  | 0.000 ppb             | 144 cps           | 2.7 %         |
| 55Mn (KED)  | -0.004 ppb            | 69 cps            | 27.5 %        |
| 56Fe (KED)  | 0.022 ppb             | 3,582 cps         | 1.7 %         |
| 58Ni (KED)  | -0.048 ppb            | 852 cps           | 14.4 %        |
| 59Co (KED)  | 0.000 ppb             | 124 cps           | 11.2 %        |
| 63Cu (KED)  | 0.009 ppb             | 1,159 cps         | 6.0 %         |
| 64Zn (KED)  | 0.048 ppb             | 2,891 cps         | 6.0 %         |
| 69Ga (KED)  | -0.004 ppb            | 83 cps            | 18.3 %        |
| 75As (KED)  | -0.002 ppb            | 7 cps             | 0.0 %         |
| 80Se (KED)  | -0.042 ppb            | 1,860 cps         | 1.8 %         |
| 85Rb (KED)  | -0.001 ppb            | 22 cps            | 69.3 %        |
| 88Sr (KED)  | -0.007 ppb            | 152 cps           | 17.8 %        |
| 89Y (KED)   | 100.000 %             | 237,360 cps       | 1.4 %         |
| 107Ag (KED) | -0.012 ppb            | 60 cps            | 9.6 %         |
| 114Cd (KED) | -0.005 ppb            | 658 cps           | 8.7 %         |
| 115In (KED) | 100.000 %             | 434,238 cps       | 1.8 %         |
| 133Cs (KED) | -0.005 ppb            | 9 cps             | 78.1 %        |
| 138Ba (KED) | 0.001 ppb             | 1,881 cps         | 2.3 %         |
| 139La (KED) | -0.003 ppb            | 49 cps            | 45.4 %        |
| 140Ce (KED) | -0.003 ppb            | 144 cps           | 3.5 %         |
| 141Pr (KED) | -0.003 ppb            | 36 cps            | 51.6 %        |
| 142Nd (KED) | -0.002 ppb            | 38 cps            | 10.2 %        |
| 152Sm (KED) | -0.002 ppb            | 16 cps            | 44.6 %        |
| 153Eu (KED) | -0.002 ppb            | 17 cps            | 20.0 %        |
| 158Gd (KED) | -0.002 ppb            | 16 cps            | 44.6 %        |
| 159Tb (KED) | 100.000 %             | 2,033,781 cps     | 0.8 %         |
| 164Dy (KED) | -0.002 ppb            | 24 cps            | 67.3 %        |
| 166Er (KED) | -0.001 ppb            | 194 cps           | 10.0 %        |
| 169Tm (KED) | -0.001 ppb            | 48 cps            | 14.5 %        |
| 174Yb (KED) | -0.001 ppb            | 36 cps            | 14.3 %        |
| 175Lu (KED) | 0.010 ppb             | 13,336 cps        | 1.5 %         |
| 205Tl (KED) | -0.001 ppb            | 12 cps            | 63.0 %        |
| 208Pb (KED) | -0.002 ppb            | 33,663 cps        | 3.5 %         |
| 209Bi (KED) | 100.000 %             | 1,813,089 cps     | 1.7 %         |
| 232Th (KED) | -0.176 ppb            | 68 cps            | 2.8 %         |
| 238U (KED)  | -0.001 ppb            | 108 cps           | 17.0 %        |

## Sample Summary

Instrument ID: iCAP Q

Analysis index: 3

Analysis name: 0+10

Analysis started at: 10/12/2021 2:57:11 PM

User name: WINDOWS-UPCI4ER\Administrator

| Category    | Concentration average | Concentration RSD |
|-------------|-----------------------|-------------------|
| 6Li (KED)   | 102.595 %             |                   |
| 9Be (KED)   | 0.000 ppb             | 1.7 %             |
| 11B (KED)   | 0.000 ppb             | 0.1 %             |
| 24Mg (KED)  | 0.000 ppb             | 0.1 %             |
| 27Al (KED)  | 0.000 ppb             | 0.2 %             |
| 45Sc (KED)  | 101.566 %             |                   |
| 51V (KED)   | 0.000 ppb             | 1.5 %             |
| 52Cr (KED)  | 0.000 ppb             | 0.4 %             |
| 55Mn (KED)  | 0.000 ppb             | 0.1 %             |
| 56Fe (KED)  | 0.000 ppb             | 0.0 %             |
| 58Ni (KED)  | 0.000 ppb             | 0.1 %             |
| 59Co (KED)  | 0.000 ppb             | 0.2 %             |
| 63Cu (KED)  | 0.000 ppb             | 0.1 %             |
| 64Zn (KED)  | 0.000 ppb             | 0.0 %             |
| 69Ga (KED)  | 0.000 ppb             | 0.3 %             |
| 75As (KED)  | 0.000 ppb             | 0.3 %             |
| 80Se (KED)  | 0.000 ppb             | 0.0 %             |
| 85Rb (KED)  | 0.000 ppb             | 0.3 %             |
| 88Sr (KED)  | 0.000 ppb             | 0.5 %             |
| 89Y (KED)   | 103.099 %             |                   |
| 107Ag (KED) | 0.000 ppb             | 1.1 %             |
| 114Cd (KED) | 0.000 ppb             | 0.3 %             |
| 115In (KED) | 102.649 %             |                   |
| 133Cs (KED) | 0.000 ppb             | 1.4 %             |
| 138Ba (KED) | 0.000 ppb             | 0.2 %             |
| 139La (KED) | 0.000 ppb             | 1.2 %             |
| 140Ce (KED) | 0.000 ppb             | 1.0 %             |
| 141Pr (KED) | 0.000 ppb             | 1.1 %             |
| 142Nd (KED) | 0.000 ppb             | 1.0 %             |
| 152Sm (KED) | 0.000 ppb             | 1.1 %             |
| 153Eu (KED) | 0.000 ppb             | 0.9 %             |
| 158Gd (KED) | 0.000 ppb             | 1.1 %             |
| 159Tb (KED) | 102.553 %             |                   |
| 164Dy (KED) | 0.000 ppb             | 0.9 %             |
| 166Er (KED) | 0.000 ppb             | 0.4 %             |
| 169Tm (KED) | 0.000 ppb             | 0.7 %             |
| 174Yb (KED) | 0.000 ppb             | 0.8 %             |
| 175Lu (KED) | 0.000 ppb             | 0.1 %             |
| 205Tl (KED) | 0.000 ppb             | 0.6 %             |
| 208Pb (KED) | 0.000 ppb             | 0.0 %             |
| 209Bi (KED) | 102.185 %             |                   |
| 232Th (KED) | 0.000 ppb             | 0.5 %             |
| 238U (KED)  | 0.000 ppb             | 0.7 %             |

| Category   | Concentration average | Intensity average | Intensity RSD |
|------------|-----------------------|-------------------|---------------|
| 6Li (KED)  | 102.595 %             | 1,406 cps         | 2.3 %         |
| 9Be (KED)  | 0.000 ppb             | 1 cps             | 173.2 %       |
| 11B (KED)  | 0.000 ppb             | 613 cps           | 4.4 %         |
| 24Mg (KED) | 0.000 ppb             | 231 cps           | 7.3 %         |
| 27Al (KED) | 0.000 ppb             | 152 cps           | 19.7 %        |

| Category    | Concentration average | Intensity average | Intensity RSD |
|-------------|-----------------------|-------------------|---------------|
| 45Sc (KED)  | 101.566 %             | 26,651 cps        | 1.1 %         |
| 51V (KED)   | 0.000 ppb             | 33 cps            | 147.3 %       |
| 52Cr (KED)  | 0.000 ppb             | 143 cps           | 34.4 %        |
| 55Mn (KED)  | 0.000 ppb             | 98 cps            | 3.9 %         |
| 56Fe (KED)  | 0.000 ppb             | 3,337 cps         | 3.0 %         |
| 58Ni (KED)  | 0.000 ppb             | 1,708 cps         | 8.0 %         |
| 59Co (KED)  | 0.000 ppb             | 130 cps           | 16.8 %        |
| 63Cu (KED)  | 0.000 ppb             | 1,000 cps         | 12.4 %        |
| 64Zn (KED)  | 0.000 ppb             | 2,636 cps         | 2.4 %         |
| 69Ga (KED)  | 0.000 ppb             | 117 cps           | 34.8 %        |
| 75As (KED)  | 0.000 ppb             | 10 cps            | 33.3 %        |
| 80Se (KED)  | 0.000 ppb             | 1,948 cps         | 4.0 %         |
| 85Rb (KED)  | 0.000 ppb             | 27 cps            | 33.1 %        |
| 88Sr (KED)  | 0.000 ppb             | 223 cps           | 51.9 %        |
| 89Y (KED)   | 103.099 %             | 244,715 cps       | 1.5 %         |
| 107Ag (KED) | 0.000 ppb             | 742 cps           | 107.1 %       |
| 114Cd (KED) | 0.000 ppb             | 794 cps           | 27.2 %        |
| 115In (KED) | 102.649 %             | 445,739 cps       | 0.8 %         |
| 133Cs (KED) | 0.000 ppb             | 183 cps           | 135.4 %       |
| 138Ba (KED) | 0.000 ppb             | 1,878 cps         | 14.2 %        |
| 139La (KED) | 0.000 ppb             | 347 cps           | 122.4 %       |
| 140Ce (KED) | 0.000 ppb             | 479 cps           | 95.4 %        |
| 141Pr (KED) | 0.000 ppb             | 362 cps           | 109.6 %       |
| 142Nd (KED) | 0.000 ppb             | 166 cps           | 95.4 %        |
| 152Sm (KED) | 0.000 ppb             | 101 cps           | 105.5 %       |
| 153Eu (KED) | 0.000 ppb             | 203 cps           | 85.4 %        |
| 158Gd (KED) | 0.000 ppb             | 108 cps           | 104.3 %       |
| 159Tb (KED) | 102.553 %             | 2,085,696 cps     | 1.2 %         |
| 164Dy (KED) | 0.000 ppb             | 132 cps           | 88.1 %        |
| 166Er (KED) | 0.000 ppb             | 293 cps           | 35.3 %        |
| 169Tm (KED) | 0.000 ppb             | 363 cps           | 67.4 %        |
| 174Yb (KED) | 0.000 ppb             | 123 cps           | 78.7 %        |
| 175Lu (KED) | 0.000 ppb             | 11,887 cps        | 5.1 %         |
| 205Tl (KED) | 0.000 ppb             | 277 cps           | 62.1 %        |
| 208Pb (KED) | 0.000 ppb             | 34,624 cps        | 1.4 %         |
| 209Bi (KED) | 102.185 %             | 1,852,709 cps     | 1.4 %         |
| 232Th (KED) | 0.000 ppb             | 47,633 cps        | 47.5 %        |
| 238U (KED)  | 0.000 ppb             | 344 cps           | 64.0 %        |

## Sample Summary

Instrument ID: iCAP Q

Analysis index: 4

Analysis name: 50+10

Analysis started at: 10/12/2021 3:02:29 PM

User name: WINDOWS-UPCI4ER\Administrator

| Category    | Concentration average | Concentration RSD |
|-------------|-----------------------|-------------------|
| 6Li (KED)   | 99.189 %              |                   |
| 9Be (KED)   | 51.724 ppb            | 8.7 %             |
| 11B (KED)   | 54.692 ppb            | 4.9 %             |
| 24Mg (KED)  | 52.236 ppb            | 5.2 %             |
| 27Al (KED)  | 48.659 ppb            | 3.3 %             |
| 45Sc (KED)  | 109.468 %             |                   |
| 51V (KED)   | 49.002 ppb            | 1.1 %             |
| 52Cr (KED)  | 48.795 ppb            | 2.1 %             |
| 55Mn (KED)  | 49.376 ppb            | 1.2 %             |
| 56Fe (KED)  | 48.912 ppb            | 1.6 %             |
| 58Ni (KED)  | 49.332 ppb            | 0.4 %             |
| 59Co (KED)  | 49.595 ppb            | 1.0 %             |
| 63Cu (KED)  | 49.181 ppb            | 0.4 %             |
| 64Zn (KED)  | 48.350 ppb            | 0.7 %             |
| 69Ga (KED)  | 48.825 ppb            | 0.4 %             |
| 75As (KED)  | 48.364 ppb            | 1.6 %             |
| 80Se (KED)  | 48.341 ppb            | 0.4 %             |
| 85Rb (KED)  | 48.161 ppb            | 1.7 %             |
| 88Sr (KED)  | 48.581 ppb            | 1.1 %             |
| 89Y (KED)   | 110.964 %             |                   |
| 107Ag (KED) | 50.527 ppb            | 0.6 %             |
| 114Cd (KED) | 49.250 ppb            | 1.3 %             |
| 115In (KED) | 109.028 %             |                   |
| 133Cs (KED) | 49.198 ppb            | 1.2 %             |
| 138Ba (KED) | 48.664 ppb            | 1.6 %             |
| 139La (KED) | 49.225 ppb            | 1.2 %             |
| 140Ce (KED) | 49.072 ppb            | 1.0 %             |
| 141Pr (KED) | 49.009 ppb            | 2.4 %             |
| 142Nd (KED) | 47.867 ppb            | 0.8 %             |
| 152Sm (KED) | 48.889 ppb            | 1.3 %             |
| 153Eu (KED) | 48.776 ppb            | 1.5 %             |
| 158Gd (KED) | 47.704 ppb            | 0.7 %             |
| 159Tb (KED) | 109.314 %             |                   |
| 164Dy (KED) | 48.155 ppb            | 0.6 %             |
| 166Er (KED) | 47.684 ppb            | 1.5 %             |
| 169Tm (KED) | 49.065 ppb            | 1.7 %             |
| 174Yb (KED) | 48.471 ppb            | 1.1 %             |
| 175Lu (KED) | 48.576 ppb            | 1.0 %             |
| 205Tl (KED) | 48.210 ppb            | 0.6 %             |
| 208Pb (KED) | 48.672 ppb            | 1.1 %             |
| 209Bi (KED) | 108.396 %             |                   |
| 232Th (KED) | 48.508 ppb            | 1.6 %             |
| 238U (KED)  | 48.934 ppb            | 1.0 %             |

| Category   | Concentration average | Intensity average | Intensity RSD |
|------------|-----------------------|-------------------|---------------|
| 6Li (KED)  | 99.189 %              | 1,359 cps         | 6.9 %         |
| 9Be (KED)  | 51.724 ppb            | 9,107 cps         | 2.4 %         |
| 11B (KED)  | 54.692 ppb            | 5,449 cps         | 3.5 %         |
| 24Mg (KED) | 52.236 ppb            | 31,441 cps        | 2.0 %         |
| 27Al (KED) | 48.659 ppb            | 8,943 cps         | 2.0 %         |

| Category    | Concentration average | Intensity average | Intensity RSD |
|-------------|-----------------------|-------------------|---------------|
| 45Sc (KED)  | 109.468 %             | 28,724 cps        | 1.3 %         |
| 51V (KED)   | 49.002 ppb            | 502,384 cps       | 1.0 %         |
| 52Cr (KED)  | 48.795 ppb            | 769,070 cps       | 1.2 %         |
| 55Mn (KED)  | 49.376 ppb            | 408,800 cps       | 1.0 %         |
| 56Fe (KED)  | 48.912 ppb            | 715,832 cps       | 1.2 %         |
| 58Ni (KED)  | 49.332 ppb            | 929,422 cps       | 1.5 %         |
| 59Co (KED)  | 49.595 ppb            | 1,501,193 cps     | 0.3 %         |
| 63Cu (KED)  | 49.181 ppb            | 1,143,661 cps     | 0.7 %         |
| 64Zn (KED)  | 48.350 ppb            | 373,856 cps       | 0.7 %         |
| 69Ga (KED)  | 48.825 ppb            | 406,608 cps       | 1.1 %         |
| 75As (KED)  | 48.364 ppb            | 103,724 cps       | 2.6 %         |
| 80Se (KED)  | 48.341 ppb            | 38,176 cps        | 0.9 %         |
| 85Rb (KED)  | 48.161 ppb            | 373,373 cps       | 0.6 %         |
| 88Sr (KED)  | 48.581 ppb            | 535,345 cps       | 1.0 %         |
| 89Y (KED)   | 110.964 %             | 263,384 cps       | 1.0 %         |
| 107Ag (KED) | 50.527 ppb            | 3,049,513 cps     | 0.3 %         |
| 114Cd (KED) | 49.250 ppb            | 1,248,286 cps     | 1.0 %         |
| 115In (KED) | 109.028 %             | 473,441 cps       | 0.3 %         |
| 133Cs (KED) | 49.198 ppb            | 1,814,098 cps     | 1.1 %         |
| 138Ba (KED) | 48.664 ppb            | 2,361,129 cps     | 0.9 %         |
| 139La (KED) | 49.225 ppb            | 5,035,385 cps     | 0.7 %         |
| 140Ce (KED) | 49.072 ppb            | 6,476,193 cps     | 0.4 %         |
| 141Pr (KED) | 49.009 ppb            | 6,843,599 cps     | 2.1 %         |
| 142Nd (KED) | 47.867 ppb            | 2,680,297 cps     | 0.1 %         |
| 152Sm (KED) | 48.889 ppb            | 2,422,733 cps     | 0.7 %         |
| 153Eu (KED) | 48.776 ppb            | 4,864,217 cps     | 1.6 %         |
| 158Gd (KED) | 47.704 ppb            | 3,096,606 cps     | 0.1 %         |
| 159Tb (KED) | 109.314 %             | 2,223,199 cps     | 0.7 %         |
| 164Dy (KED) | 48.155 ppb            | 3,512,117 cps     | 0.2 %         |
| 166Er (KED) | 47.684 ppb            | 4,140,489 cps     | 1.7 %         |
| 169Tm (KED) | 49.065 ppb            | 14,079,619 cps    | 1.7 %         |
| 174Yb (KED) | 48.471 ppb            | 4,918,700 cps     | 1.2 %         |
| 175Lu (KED) | 48.576 ppb            | 9,082,253 cps     | 0.5 %         |
| 205Tl (KED) | 48.210 ppb            | 9,659,902 cps     | 0.2 %         |
| 208Pb (KED) | 48.672 ppb            | 6,959,512 cps     | 0.8 %         |
| 209Bi (KED) | 108.396 %             | 1,965,309 cps     | 0.7 %         |
| 232Th (KED) | 48.508 ppb            | 13,983,390 cps    | 1.0 %         |
| 238U (KED)  | 48.934 ppb            | 15,754,184 cps    | 0.4 %         |

## Sample Summary

Instrument ID: iCAP Q

Analysis index: 5

Analysis name: 100+10

Analysis started at: 10/12/2021 3:06:31 PM

User name: WINDOWS-UPCI4ER\Administrator

| Category    | Concentration average | Concentration RSD |
|-------------|-----------------------|-------------------|
| 6Li (KED)   | 103.082 %             |                   |
| 9Be (KED)   | 99.138 ppb            | 5.1 %             |
| 11B (KED)   | 97.654 ppb            | 7.6 %             |
| 24Mg (KED)  | 98.882 ppb            | 6.4 %             |
| 27Al (KED)  | 100.670 ppb           | 2.2 %             |
| 45Sc (KED)  | 107.244 %             |                   |
| 51V (KED)   | 100.499 ppb           | 1.4 %             |
| 52Cr (KED)  | 100.602 ppb           | 0.9 %             |
| 55Mn (KED)  | 100.312 ppb           | 0.4 %             |
| 56Fe (KED)  | 100.544 ppb           | 0.5 %             |
| 58Ni (KED)  | 100.334 ppb           | 1.2 %             |
| 59Co (KED)  | 100.202 ppb           | 0.7 %             |
| 63Cu (KED)  | 100.410 ppb           | 1.0 %             |
| 64Zn (KED)  | 100.825 ppb           | 2.2 %             |
| 69Ga (KED)  | 100.587 ppb           | 1.7 %             |
| 75As (KED)  | 100.818 ppb           | 2.0 %             |
| 80Se (KED)  | 100.829 ppb           | 1.7 %             |
| 85Rb (KED)  | 100.920 ppb           | 0.8 %             |
| 88Sr (KED)  | 100.709 ppb           | 2.4 %             |
| 89Y (KED)   | 106.951 %             |                   |
| 107Ag (KED) | 99.737 ppb            | 3.6 %             |
| 114Cd (KED) | 100.375 ppb           | 1.2 %             |
| 115In (KED) | 105.990 %             |                   |
| 133Cs (KED) | 100.401 ppb           | 1.4 %             |
| 138Ba (KED) | 100.668 ppb           | 1.9 %             |
| 139La (KED) | 100.388 ppb           | 0.8 %             |
| 140Ce (KED) | 100.464 ppb           | 2.3 %             |
| 141Pr (KED) | 100.495 ppb           | 2.4 %             |
| 142Nd (KED) | 101.066 ppb           | 1.3 %             |
| 152Sm (KED) | 100.556 ppb           | 1.6 %             |
| 153Eu (KED) | 100.612 ppb           | 3.0 %             |
| 158Gd (KED) | 101.148 ppb           | 3.6 %             |
| 159Tb (KED) | 107.484 %             |                   |
| 164Dy (KED) | 100.922 ppb           | 3.9 %             |
| 166Er (KED) | 101.158 ppb           | 1.9 %             |
| 169Tm (KED) | 100.467 ppb           | 1.6 %             |
| 174Yb (KED) | 100.765 ppb           | 2.1 %             |
| 175Lu (KED) | 100.712 ppb           | 1.9 %             |
| 205Tl (KED) | 100.895 ppb           | 1.2 %             |
| 208Pb (KED) | 100.664 ppb           | 1.1 %             |
| 209Bi (KED) | 106.032 %             |                   |
| 232Th (KED) | 100.746 ppb           | 0.5 %             |
| 238U (KED)  | 100.533 ppb           | 1.0 %             |

| Category   | Concentration average | Intensity average | Intensity RSD |
|------------|-----------------------|-------------------|---------------|
| 6Li (KED)  | 103.082 %             | 1,412 cps         | 5.1 %         |
| 9Be (KED)  | 99.138 ppb            | 18,181 cps        | 1.9 %         |
| 11B (KED)  | 97.654 ppb            | 9,622 cps         | 2.2 %         |
| 24Mg (KED) | 98.882 ppb            | 61,659 cps        | 1.5 %         |
| 27Al (KED) | 100.670 ppb           | 17,960 cps        | 2.1 %         |

| Category    | Concentration average | Intensity average | Intensity RSD |
|-------------|-----------------------|-------------------|---------------|
| 45Sc (KED)  | 107.244 %             | 28,141 cps        | 0.4 %         |
| 51V (KED)   | 100.499 ppb           | 1,009,440 cps     | 1.3 %         |
| 52Cr (KED)  | 100.602 ppb           | 1,553,510 cps     | 1.3 %         |
| 55Mn (KED)  | 100.312 ppb           | 813,591 cps       | 0.8 %         |
| 56Fe (KED)  | 100.544 ppb           | 1,438,016 cps     | 0.9 %         |
| 58Ni (KED)  | 100.334 ppb           | 1,850,034 cps     | 1.5 %         |
| 59Co (KED)  | 100.202 ppb           | 2,971,538 cps     | 1.0 %         |
| 63Cu (KED)  | 100.410 ppb           | 2,249,141 cps     | 1.7 %         |
| 64Zn (KED)  | 100.825 ppb           | 748,221 cps       | 1.2 %         |
| 69Ga (KED)  | 100.587 ppb           | 807,023 cps       | 0.9 %         |
| 75As (KED)  | 100.818 ppb           | 208,297 cps       | 0.8 %         |
| 80Se (KED)  | 100.829 ppb           | 74,534 cps        | 1.1 %         |
| 85Rb (KED)  | 100.920 ppb           | 754,052 cps       | 1.8 %         |
| 88Sr (KED)  | 100.709 ppb           | 1,069,084 cps     | 1.6 %         |
| 89Y (KED)   | 106.951 %             | 253,859 cps       | 2.5 %         |
| 107Ag (KED) | 99.737 ppb            | 5,849,963 cps     | 2.9 %         |
| 114Cd (KED) | 100.375 ppb           | 2,472,201 cps     | 0.1 %         |
| 115In (KED) | 105.990 %             | 460,250 cps       | 1.3 %         |
| 133Cs (KED) | 100.401 ppb           | 3,598,376 cps     | 0.3 %         |
| 138Ba (KED) | 100.668 ppb           | 4,799,327 cps     | 0.7 %         |
| 139La (KED) | 100.388 ppb           | 10,095,997 cps    | 1.6 %         |
| 140Ce (KED) | 100.464 ppb           | 13,032,037 cps    | 0.7 %         |
| 141Pr (KED) | 100.495 ppb           | 13,793,834 cps    | 0.7 %         |
| 142Nd (KED) | 101.066 ppb           | 5,563,355 cps     | 1.2 %         |
| 152Sm (KED) | 100.556 ppb           | 4,898,792 cps     | 1.1 %         |
| 153Eu (KED) | 100.612 ppb           | 9,860,706 cps     | 0.7 %         |
| 158Gd (KED) | 101.148 ppb           | 6,452,737 cps     | 2.0 %         |
| 159Tb (KED) | 107.484 %             | 2,185,998 cps     | 2.4 %         |
| 164Dy (KED) | 100.922 ppb           | 7,232,991 cps     | 1.5 %         |
| 166Er (KED) | 101.158 ppb           | 8,635,205 cps     | 2.3 %         |
| 169Tm (KED) | 100.467 ppb           | 28,343,594 cps    | 2.0 %         |
| 174Yb (KED) | 100.765 ppb           | 10,050,711 cps    | 0.5 %         |
| 175Lu (KED) | 100.712 ppb           | 18,496,819 cps    | 0.6 %         |
| 205Tl (KED) | 100.895 ppb           | 19,775,980 cps    | 1.3 %         |
| 208Pb (KED) | 100.664 ppb           | 14,041,729 cps    | 0.9 %         |
| 209Bi (KED) | 106.032 %             | 1,922,451 cps     | 0.2 %         |
| 232Th (KED) | 100.746 ppb           | 28,357,130 cps    | 0.6 %         |
| 238U (KED)  | 100.533 ppb           | 31,661,756 cps    | 1.2 %         |

## Sample Summary

Instrument ID: iCAP Q

Analysis index: 6

Analysis name: 20ti

Analysis started at: 10/12/2021 3:10:20 PM

User name: WINDOWS-UPCI4ER\Administrator

| Category    | Concentration average | Concentration RSD |
|-------------|-----------------------|-------------------|
| 6Li (KED)   | 105.596 %             | 2.0 %             |
| 9Be (KED)   | 0.011 ppb             | 152.9 %           |
| 11B (KED)   | -2.205 ppb            | 18.1 %            |
| 24Mg (KED)  | 102.476 ppb           | 3.7 %             |
| 27Al (KED)  | 93.844 ppb            | 0.7 %             |
| 45Sc (KED)  | 103.896 %             | 2.9 %             |
| 51V (KED)   | 0.171 ppb             | 2.1 %             |
| 52Cr (KED)  | 1.125 ppb             | 1.2 %             |
| 55Mn (KED)  | 3.116 ppb             | 0.8 %             |
| 56Fe (KED)  | 119.773 ppb           | 1.0 %             |
| 58Ni (KED)  | 0.637 ppb             | 4.4 %             |
| 59Co (KED)  | 0.052 ppb             | 7.6 %             |
| 63Cu (KED)  | 7.219 ppb             | 2.4 %             |
| 64Zn (KED)  | 49.462 ppb            | 1.8 %             |
| 69Ga (KED)  | 0.427 ppb             | 1.5 %             |
| 75As (KED)  | 0.055 ppb             | 1.0 %             |
| 80Se (KED)  | -0.351 ppb            | 10.4 %            |
| 85Rb (KED)  | 1.013 ppb             | 3.8 %             |
| 88Sr (KED)  | 1.569 ppb             | 3.2 %             |
| 89Y (KED)   | 105.696 %             | 2.5 %             |
| 107Ag (KED) | 0.439 ppb             | 0.8 %             |
| 114Cd (KED) | 0.013 ppb             | 23.6 %            |
| 115In (KED) | 105.495 %             | 2.6 %             |
| 133Cs (KED) | 0.013 ppb             | 15.2 %            |
| 138Ba (KED) | 1.517 ppb             | 1.2 %             |
| 139La (KED) | 0.091 ppb             | 3.0 %             |
| 140Ce (KED) | 0.350 ppb             | 3.2 %             |
| 141Pr (KED) | 0.021 ppb             | 5.0 %             |
| 142Nd (KED) | 0.168 ppb             | 4.4 %             |
| 152Sm (KED) | 0.014 ppb             | 7.3 %             |
| 153Eu (KED) | 0.002 ppb             | 22.9 %            |
| 158Gd (KED) | 0.013 ppb             | 5.5 %             |
| 159Tb (KED) | 108.370 %             | 2.0 %             |
| 164Dy (KED) | 0.009 ppb             | 2.8 %             |
| 166Er (KED) | 0.012 ppb             | 9.3 %             |
| 169Tm (KED) | 0.000 ppb             | 132.4 %           |
| 174Yb (KED) | 0.004 ppb             | 19.9 %            |
| 175Lu (KED) | -0.009 ppb            | 27.9 %            |
| 205Tl (KED) | 0.006 ppb             | 14.8 %            |
| 208Pb (KED) | 0.410 ppb             | 3.5 %             |
| 209Bi (KED) | 107.216 %             | 1.6 %             |
| 232Th (KED) | -0.073 ppb            | 66.0 %            |
| 238U (KED)  | 0.009 ppb             | 14.9 %            |

| Category   | Concentration average | Intensity average | Intensity RSD |
|------------|-----------------------|-------------------|---------------|
| 6Li (KED)  | 105.596 %             | 1,447 cps         | 2.0 %         |
| 9Be (KED)  | 0.011 ppb             | 3 cps             | 100.0 %       |
| 11B (KED)  | -2.205 ppb            | 423 cps           | 10.7 %        |
| 24Mg (KED) | 102.476 ppb           | 65,560 cps        | 2.2 %         |
| 27Al (KED) | 93.844 ppb            | 16,231 cps        | 3.2 %         |

| Category    | Concentration average | Intensity average | Intensity RSD |
|-------------|-----------------------|-------------------|---------------|
| 45Sc (KED)  | 103.896 %             | 27,262 cps        | 2.9 %         |
| 51V (KED)   | 0.171 ppb             | 1,696 cps         | 3.5 %         |
| 52Cr (KED)  | 1.125 ppb             | 16,973 cps        | 1.7 %         |
| 55Mn (KED)  | 3.116 ppb             | 24,578 cps        | 2.1 %         |
| 56Fe (KED)  | 119.773 ppb           | 1,658,825 cps     | 2.9 %         |
| 58Ni (KED)  | 0.637 ppb             | 13,116 cps        | 1.7 %         |
| 59Co (KED)  | 0.052 ppb             | 1,622 cps         | 7.6 %         |
| 63Cu (KED)  | 7.219 ppb             | 160,754 cps       | 2.5 %         |
| 64Zn (KED)  | 49.462 ppb            | 364,142 cps       | 0.9 %         |
| 69Ga (KED)  | 0.427 ppb             | 3,504 cps         | 1.2 %         |
| 75As (KED)  | 0.055 ppb             | 122 cps           | 1.6 %         |
| 80Se (KED)  | -0.351 ppb            | 1,747 cps         | 1.3 %         |
| 85Rb (KED)  | 1.013 ppb             | 7,506 cps         | 1.9 %         |
| 88Sr (KED)  | 1.569 ppb             | 16,687 cps        | 2.1 %         |
| 89Y (KED)   | 105.696 %             | 250,881 cps       | 2.5 %         |
| 107Ag (KED) | 0.439 ppb             | 26,392 cps        | 3.1 %         |
| 114Cd (KED) | 0.013 ppb             | 1,129 cps         | 8.6 %         |
| 115In (KED) | 105.495 %             | 458,100 cps       | 2.6 %         |
| 133Cs (KED) | 0.013 ppb             | 663 cps           | 9.1 %         |
| 138Ba (KED) | 1.517 ppb             | 74,889 cps        | 1.3 %         |
| 139La (KED) | 0.091 ppb             | 9,553 cps         | 3.4 %         |
| 140Ce (KED) | 0.350 ppb             | 46,267 cps        | 1.7 %         |
| 141Pr (KED) | 0.021 ppb             | 3,323 cps         | 4.4 %         |
| 142Nd (KED) | 0.168 ppb             | 9,515 cps         | 3.6 %         |
| 152Sm (KED) | 0.014 ppb             | 798 cps           | 6.3 %         |
| 153Eu (KED) | 0.002 ppb             | 442 cps           | 11.6 %        |
| 158Gd (KED) | 0.013 ppb             | 937 cps           | 5.4 %         |
| 159Tb (KED) | 108.370 %             | 2,204,016 cps     | 2.0 %         |
| 164Dy (KED) | 0.009 ppb             | 807 cps           | 1.8 %         |
| 166Er (KED) | 0.012 ppb             | 1,308 cps         | 8.3 %         |
| 169Tm (KED) | 0.000 ppb             | 480 cps           | 27.2 %        |
| 174Yb (KED) | 0.004 ppb             | 507 cps           | 15.5 %        |
| 175Lu (KED) | -0.009 ppb            | 10,959 cps        | 4.4 %         |
| 205Tl (KED) | 0.006 ppb             | 1,456 cps         | 13.4 %        |
| 208Pb (KED) | 0.410 ppb             | 94,040 cps        | 0.7 %         |
| 209Bi (KED) | 107.216 %             | 1,943,931 cps     | 1.6 %         |
| 232Th (KED) | -0.073 ppb            | 29,471 cps        | 48.5 %        |
| 238U (KED)  | 0.009 ppb             | 3,184 cps         | 14.8 %        |

## Sample Summary

Instrument ID: iCAP Q

Analysis index: 7

Analysis name: w7ti

Analysis started at: 10/12/2021 3:14:12 PM

User name: WINDOWS-UPCI4ER\Administrator

| Category    | Concentration average | Concentration RSD |
|-------------|-----------------------|-------------------|
| 6Li (KED)   | 111.517 %             | 4.9 %             |
| 9Be (KED)   | 0.010 ppb             | 156.6 %           |
| 11B (KED)   | -0.608 ppb            | 90.1 %            |
| 24Mg (KED)  | 197.637 ppb           | 3.8 %             |
| 27Al (KED)  | 173.628 ppb           | 1.0 %             |
| 45Sc (KED)  | 106.696 %             | 1.2 %             |
| 51V (KED)   | 0.344 ppb             | 1.8 %             |
| 52Cr (KED)  | 1.109 ppb             | 1.2 %             |
| 55Mn (KED)  | 6.256 ppb             | 1.1 %             |
| 56Fe (KED)  | 215.409 ppb           | 1.5 %             |
| 58Ni (KED)  | 0.944 ppb             | 1.5 %             |
| 59Co (KED)  | 0.096 ppb             | 0.9 %             |
| 63Cu (KED)  | 7.190 ppb             | 0.1 %             |
| 64Zn (KED)  | 62.030 ppb            | 0.9 %             |
| 69Ga (KED)  | 0.713 ppb             | 3.8 %             |
| 75As (KED)  | 0.097 ppb             | 18.2 %            |
| 80Se (KED)  | -0.249 ppb            | 19.9 %            |
| 85Rb (KED)  | 1.205 ppb             | 1.2 %             |
| 88Sr (KED)  | 2.841 ppb             | 0.8 %             |
| 89Y (KED)   | 109.847 %             | 1.1 %             |
| 107Ag (KED) | 0.449 ppb             | 1.6 %             |
| 114Cd (KED) | 0.026 ppb             | 11.2 %            |
| 115In (KED) | 107.765 %             | 1.1 %             |
| 133Cs (KED) | 0.029 ppb             | 4.6 %             |
| 138Ba (KED) | 2.555 ppb             | 1.0 %             |
| 139La (KED) | 0.164 ppb             | 1.9 %             |
| 140Ce (KED) | 0.660 ppb             | 1.4 %             |
| 141Pr (KED) | 0.040 ppb             | 1.5 %             |
| 142Nd (KED) | 0.317 ppb             | 1.0 %             |
| 152Sm (KED) | 0.031 ppb             | 5.7 %             |
| 153Eu (KED) | 0.004 ppb             | 5.1 %             |
| 158Gd (KED) | 0.028 ppb             | 7.8 %             |
| 159Tb (KED) | 113.746 %             | 2.4 %             |
| 164Dy (KED) | 0.019 ppb             | 2.1 %             |
| 166Er (KED) | 0.021 ppb             | 4.1 %             |
| 169Tm (KED) | 0.000 ppb             | 40.0 %            |
| 174Yb (KED) | 0.007 ppb             | 14.5 %            |
| 175Lu (KED) | -0.011 ppb            | 8.8 %             |
| 205Tl (KED) | 0.005 ppb             | 3.9 %             |
| 208Pb (KED) | 0.884 ppb             | 0.9 %             |
| 209Bi (KED) | 108.636 %             | 0.8 %             |
| 232Th (KED) | -0.116 ppb            | 1.9 %             |
| 238U (KED)  | 0.011 ppb             | 3.7 %             |

| Category   | Concentration average | Intensity average | Intensity RSD |
|------------|-----------------------|-------------------|---------------|
| 6Li (KED)  | 111.517 %             | 1,528 cps         | 4.9 %         |
| 9Be (KED)  | 0.010 ppb             | 3 cps             | 100.0 %       |
| 11B (KED)  | -0.608 ppb            | 608 cps           | 13.4 %        |
| 24Mg (KED) | 197.637 ppb           | 133,192 cps       | 1.2 %         |
| 27Al (KED) | 173.628 ppb           | 30,701 cps        | 1.3 %         |

| Category    | Concentration average | Intensity average | Intensity RSD |
|-------------|-----------------------|-------------------|---------------|
| 45Sc (KED)  | 106.696 %             | 27,997 cps        | 1.2 %         |
| 51V (KED)   | 0.344 ppb             | 3,474 cps         | 2.8 %         |
| 52Cr (KED)  | 1.109 ppb             | 17,182 cps        | 1.7 %         |
| 55Mn (KED)  | 6.256 ppb             | 50,577 cps        | 0.9 %         |
| 56Fe (KED)  | 215.409 ppb           | 3,060,711 cps     | 0.2 %         |
| 58Ni (KED)  | 0.944 ppb             | 19,098 cps        | 0.7 %         |
| 59Co (KED)  | 0.096 ppb             | 2,965 cps         | 0.4 %         |
| 63Cu (KED)  | 7.190 ppb             | 166,417 cps       | 1.0 %         |
| 64Zn (KED)  | 62.030 ppb            | 474,007 cps       | 1.0 %         |
| 69Ga (KED)  | 0.713 ppb             | 6,003 cps         | 3.0 %         |
| 75As (KED)  | 0.097 ppb             | 217 cps           | 16.3 %        |
| 80Se (KED)  | -0.249 ppb            | 1,891 cps         | 2.6 %         |
| 85Rb (KED)  | 1.205 ppb             | 9,275 cps         | 2.1 %         |
| 88Sr (KED)  | 2.841 ppb             | 31,219 cps        | 1.5 %         |
| 89Y (KED)   | 109.847 %             | 260,732 cps       | 1.1 %         |
| 107Ag (KED) | 0.449 ppb             | 27,587 cps        | 2.1 %         |
| 114Cd (KED) | 0.026 ppb             | 1,492 cps         | 4.8 %         |
| 115In (KED) | 107.765 %             | 467,955 cps       | 1.1 %         |
| 133Cs (KED) | 0.029 ppb             | 1,242 cps         | 3.0 %         |
| 138Ba (KED) | 2.555 ppb             | 130,964 cps       | 2.5 %         |
| 139La (KED) | 0.164 ppb             | 17,862 cps        | 1.1 %         |
| 140Ce (KED) | 0.660 ppb             | 91,131 cps        | 1.2 %         |
| 141Pr (KED) | 0.040 ppb             | 6,160 cps         | 1.9 %         |
| 142Nd (KED) | 0.317 ppb             | 18,655 cps        | 1.8 %         |
| 152Sm (KED) | 0.031 ppb             | 1,689 cps         | 3.1 %         |
| 153Eu (KED) | 0.004 ppb             | 677 cps           | 5.5 %         |
| 158Gd (KED) | 0.028 ppb             | 1,981 cps         | 4.9 %         |
| 159Tb (KED) | 113.746 %             | 2,313,350 cps     | 2.4 %         |
| 164Dy (KED) | 0.019 ppb             | 1,566 cps         | 2.7 %         |
| 166Er (KED) | 0.021 ppb             | 2,222 cps         | 1.2 %         |
| 169Tm (KED) | 0.000 ppb             | 490 cps           | 5.8 %         |
| 174Yb (KED) | 0.007 ppb             | 830 cps           | 13.7 %        |
| 175Lu (KED) | -0.011 ppb            | 10,960 cps        | 2.8 %         |
| 205Tl (KED) | 0.005 ppb             | 1,208 cps         | 3.1 %         |
| 208Pb (KED) | 0.884 ppb             | 162,881 cps       | 0.2 %         |
| 209Bi (KED) | 108.636 %             | 1,969,664 cps     | 0.8 %         |
| 232Th (KED) | -0.116 ppb            | 17,379 cps        | 4.4 %         |
| 238U (KED)  | 0.011 ppb             | 4,032 cps         | 2.7 %         |

## Sample Summary

Instrument ID: iCAP Q

Analysis index: 8

Analysis name: 27ti

Analysis started at: 10/12/2021 3:18:47 PM

User name: WINDOWS-UPCI4ER\Administrator

| Category    | Concentration average | Concentration RSD |
|-------------|-----------------------|-------------------|
| 6Li (KED)   | 123.197 %             | 3.9 %             |
| 9Be (KED)   | 0.018 ppb             | 166.3 %           |
| 11B (KED)   | 1.581 ppb             | 37.3 %            |
| 24Mg (KED)  | 220.034 ppb           | 4.0 %             |
| 27Al (KED)  | 284.557 ppb           | 0.8 %             |
| 45Sc (KED)  | 115.801 %             | 1.6 %             |
| 51V (KED)   | 0.509 ppb             | 2.4 %             |
| 52Cr (KED)  | 1.308 ppb             | 1.8 %             |
| 55Mn (KED)  | 8.162 ppb             | 1.2 %             |
| 56Fe (KED)  | 325.541 ppb           | 0.2 %             |
| 58Ni (KED)  | 1.392 ppb             | 0.6 %             |
| 59Co (KED)  | 0.123 ppb             | 1.1 %             |
| 63Cu (KED)  | 5.309 ppb             | 1.0 %             |
| 64Zn (KED)  | 51.374 ppb            | 1.8 %             |
| 69Ga (KED)  | 1.070 ppb             | 2.2 %             |
| 75As (KED)  | 0.101 ppb             | 10.2 %            |
| 80Se (KED)  | -0.372 ppb            | 21.3 %            |
| 85Rb (KED)  | 1.130 ppb             | 2.6 %             |
| 88Sr (KED)  | 3.332 ppb             | 2.0 %             |
| 89Y (KED)   | 118.449 %             | 0.4 %             |
| 107Ag (KED) | 0.306 ppb             | 3.7 %             |
| 114Cd (KED) | -0.014 ppb            | 13.1 %            |
| 115In (KED) | 116.266 %             | 1.9 %             |
| 133Cs (KED) | 0.043 ppb             | 2.5 %             |
| 138Ba (KED) | 3.836 ppb             | 1.3 %             |
| 139La (KED) | 0.288 ppb             | 1.5 %             |
| 140Ce (KED) | 0.977 ppb             | 1.6 %             |
| 141Pr (KED) | 0.067 ppb             | 1.9 %             |
| 142Nd (KED) | 0.492 ppb             | 3.5 %             |
| 152Sm (KED) | 0.046 ppb             | 2.9 %             |
| 153Eu (KED) | 0.008 ppb             | 6.8 %             |
| 158Gd (KED) | 0.042 ppb             | 3.5 %             |
| 159Tb (KED) | 120.577 %             | 0.5 %             |
| 164Dy (KED) | 0.029 ppb             | 5.8 %             |
| 166Er (KED) | 0.027 ppb             | 2.1 %             |
| 169Tm (KED) | 0.001 ppb             | 11.9 %            |
| 174Yb (KED) | 0.012 ppb             | 0.2 %             |
| 175Lu (KED) | -0.014 ppb            | 7.8 %             |
| 205Tl (KED) | 0.003 ppb             | 0.8 %             |
| 208Pb (KED) | 0.183 ppb             | 6.0 %             |
| 209Bi (KED) | 117.555 %             | 1.1 %             |
| 232Th (KED) | -0.093 ppb            | 1.4 %             |
| 238U (KED)  | 0.015 ppb             | 3.7 %             |

| Category   | Concentration average | Intensity average | Intensity RSD |
|------------|-----------------------|-------------------|---------------|
| 6Li (KED)  | 123.197 %             | 1,688 cps         | 3.9 %         |
| 9Be (KED)  | 0.018 ppb             | 6 cps             | 124.9 %       |
| 11B (KED)  | 1.581 ppb             | 910 cps           | 3.3 %         |
| 24Mg (KED) | 220.034 ppb           | 163,820 cps       | 1.2 %         |
| 27Al (KED) | 284.557 ppb           | 54,499 cps        | 1.7 %         |

| Category    | Concentration average | Intensity average | Intensity RSD |
|-------------|-----------------------|-------------------|---------------|
| 45Sc (KED)  | 115.801 %             | 30,386 cps        | 1.6 %         |
| 51V (KED)   | 0.509 ppb             | 5,560 cps         | 3.2 %         |
| 52Cr (KED)  | 1.308 ppb             | 21,963 cps        | 2.0 %         |
| 55Mn (KED)  | 8.162 ppb             | 71,572 cps        | 0.4 %         |
| 56Fe (KED)  | 325.541 ppb           | 5,018,842 cps     | 1.5 %         |
| 58Ni (KED)  | 1.392 ppb             | 29,630 cps        | 1.2 %         |
| 59Co (KED)  | 0.123 ppb             | 4,085 cps         | 2.5 %         |
| 63Cu (KED)  | 5.309 ppb             | 132,824 cps       | 1.4 %         |
| 64Zn (KED)  | 51.374 ppb            | 423,859 cps       | 1.8 %         |
| 69Ga (KED)  | 1.070 ppb             | 9,640 cps         | 2.3 %         |
| 75As (KED)  | 0.101 ppb             | 243 cps           | 9.9 %         |
| 80Se (KED)  | -0.372 ppb            | 1,941 cps         | 3.0 %         |
| 85Rb (KED)  | 1.130 ppb             | 9,382 cps         | 2.7 %         |
| 88Sr (KED)  | 3.332 ppb             | 39,436 cps        | 1.7 %         |
| 89Y (KED)   | 118.449 %             | 281,150 cps       | 0.4 %         |
| 107Ag (KED) | 0.306 ppb             | 20,516 cps        | 2.7 %         |
| 114Cd (KED) | -0.014 ppb            | 522 cps           | 10.7 %        |
| 115In (KED) | 116.266 %             | 504,874 cps       | 1.9 %         |
| 133Cs (KED) | 0.043 ppb             | 1,911 cps         | 3.7 %         |
| 138Ba (KED) | 3.836 ppb             | 207,321 cps       | 1.4 %         |
| 139La (KED) | 0.288 ppb             | 32,860 cps        | 1.9 %         |
| 140Ce (KED) | 0.977 ppb             | 142,759 cps       | 2.0 %         |
| 141Pr (KED) | 0.067 ppb             | 10,797 cps        | 2.2 %         |
| 142Nd (KED) | 0.492 ppb             | 30,578 cps        | 3.1 %         |
| 152Sm (KED) | 0.046 ppb             | 2,614 cps         | 3.2 %         |
| 153Eu (KED) | 0.008 ppb             | 1,067 cps         | 4.9 %         |
| 158Gd (KED) | 0.042 ppb             | 3,108 cps         | 2.9 %         |
| 159Tb (KED) | 120.577 %             | 2,452,278 cps     | 0.5 %         |
| 164Dy (KED) | 0.029 ppb             | 2,456 cps         | 5.7 %         |
| 166Er (KED) | 0.027 ppb             | 2,900 cps         | 2.0 %         |
| 169Tm (KED) | 0.001 ppb             | 641 cps           | 4.2 %         |
| 174Yb (KED) | 0.012 ppb             | 1,455 cps         | 0.4 %         |
| 175Lu (KED) | -0.014 ppb            | 11,017 cps        | 2.1 %         |
| 205Tl (KED) | 0.003 ppb             | 1,061 cps         | 0.8 %         |
| 208Pb (KED) | 0.183 ppb             | 68,029 cps        | 3.3 %         |
| 209Bi (KED) | 117.555 %             | 2,131,385 cps     | 1.1 %         |
| 232Th (KED) | -0.093 ppb            | 26,148 cps        | 0.5 %         |
| 238U (KED)  | 0.015 ppb             | 5,631 cps         | 2.7 %         |

## Sample Summary

Instrument ID: iCAP Q

Analysis index: 9

Analysis name: 00089ti

Analysis started at: 10/12/2021 3:23:07 PM

User name: WINDOWS-UPCI4ER\Administrator

| Category    | Concentration average | Concentration RSD |
|-------------|-----------------------|-------------------|
| 6Li (KED)   | 123.846 %             | 1.9 %             |
| 9Be (KED)   | -0.001 ppb            | 841.5 %           |
| 11B (KED)   | 2.439 ppb             | 21.1 %            |
| 24Mg (KED)  | 240.346 ppb           | 2.4 %             |
| 27Al (KED)  | 190.688 ppb           | 1.6 %             |
| 45Sc (KED)  | 116.599 %             | 0.7 %             |
| 51V (KED)   | 0.387 ppb             | 2.4 %             |
| 52Cr (KED)  | 1.161 ppb             | 0.5 %             |
| 55Mn (KED)  | 7.340 ppb             | 1.9 %             |
| 56Fe (KED)  | 241.841 ppb           | 0.3 %             |
| 58Ni (KED)  | 1.023 ppb             | 1.1 %             |
| 59Co (KED)  | 0.095 ppb             | 4.3 %             |
| 63Cu (KED)  | 7.098 ppb             | 0.7 %             |
| 64Zn (KED)  | 51.357 ppb            | 2.0 %             |
| 69Ga (KED)  | 0.851 ppb             | 2.2 %             |
| 75As (KED)  | 0.103 ppb             | 8.2 %             |
| 80Se (KED)  | -0.444 ppb            | 15.4 %            |
| 85Rb (KED)  | 1.576 ppb             | 2.0 %             |
| 88Sr (KED)  | 3.337 ppb             | 2.0 %             |
| 89Y (KED)   | 118.451 %             | 1.3 %             |
| 107Ag (KED) | 0.389 ppb             | 2.6 %             |
| 114Cd (KED) | 0.023 ppb             | 5.8 %             |
| 115In (KED) | 115.182 %             | 1.4 %             |
| 133Cs (KED) | 0.030 ppb             | 12.5 %            |
| 138Ba (KED) | 2.948 ppb             | 1.3 %             |
| 139La (KED) | 0.189 ppb             | 1.3 %             |
| 140Ce (KED) | 0.841 ppb             | 20.3 %            |
| 141Pr (KED) | 0.043 ppb             | 1.4 %             |
| 142Nd (KED) | 0.356 ppb             | 0.8 %             |
| 152Sm (KED) | 0.032 ppb             | 5.3 %             |
| 153Eu (KED) | 0.005 ppb             | 11.7 %            |
| 158Gd (KED) | 0.030 ppb             | 3.9 %             |
| 159Tb (KED) | 120.252 %             | 0.8 %             |
| 164Dy (KED) | 0.020 ppb             | 1.9 %             |
| 166Er (KED) | 0.024 ppb             | 5.6 %             |
| 169Tm (KED) | 0.000 ppb             | 180.0 %           |
| 174Yb (KED) | 0.007 ppb             | 6.4 %             |
| 175Lu (KED) | -0.013 ppb            | 10.2 %            |
| 205Tl (KED) | 0.004 ppb             | 3.7 %             |
| 208Pb (KED) | 0.570 ppb             | 0.6 %             |
| 209Bi (KED) | 115.823 %             | 0.4 %             |
| 232Th (KED) | -0.113 ppb            | 0.8 %             |
| 238U (KED)  | 0.013 ppb             | 3.1 %             |

| Category   | Concentration average | Intensity average | Intensity RSD |
|------------|-----------------------|-------------------|---------------|
| 6Li (KED)  | 123.846 %             | 1,697 cps         | 1.9 %         |
| 9Be (KED)  | -0.001 ppb            | 1 cps             | 173.2 %       |
| 11B (KED)  | 2.439 ppb             | 1,011 cps         | 4.0 %         |
| 24Mg (KED) | 240.346 ppb           | 179,989 cps       | 0.7 %         |
| 27Al (KED) | 190.688 ppb           | 36,829 cps        | 1.2 %         |

| Category    | Concentration average | Intensity average | Intensity RSD |
|-------------|-----------------------|-------------------|---------------|
| 45Sc (KED)  | 116.599 %             | 30,595 cps        | 0.7 %         |
| 51V (KED)   | 0.387 ppb             | 4,261 cps         | 1.7 %         |
| 52Cr (KED)  | 1.161 ppb             | 19,658 cps        | 0.5 %         |
| 55Mn (KED)  | 7.340 ppb             | 64,825 cps        | 1.8 %         |
| 56Fe (KED)  | 241.841 ppb           | 3,755,132 cps     | 0.4 %         |
| 58Ni (KED)  | 1.023 ppb             | 22,452 cps        | 0.5 %         |
| 59Co (KED)  | 0.095 ppb             | 3,199 cps         | 4.7 %         |
| 63Cu (KED)  | 7.098 ppb             | 177,196 cps       | 1.6 %         |
| 64Zn (KED)  | 51.357 ppb            | 423,765 cps       | 3.0 %         |
| 69Ga (KED)  | 0.851 ppb             | 7,696 cps         | 2.8 %         |
| 75As (KED)  | 0.103 ppb             | 248 cps           | 8.1 %         |
| 80Se (KED)  | -0.444 ppb            | 1,883 cps         | 2.7 %         |
| 85Rb (KED)  | 1.576 ppb             | 13,070 cps        | 0.9 %         |
| 88Sr (KED)  | 3.337 ppb             | 39,492 cps        | 1.4 %         |
| 89Y (KED)   | 118.451 %             | 281,155 cps       | 1.3 %         |
| 107Ag (KED) | 0.389 ppb             | 25,611 cps        | 1.3 %         |
| 114Cd (KED) | 0.023 ppb             | 1,509 cps         | 3.5 %         |
| 115In (KED) | 115.182 %             | 500,166 cps       | 1.4 %         |
| 133Cs (KED) | 0.030 ppb             | 1,375 cps         | 11.9 %        |
| 138Ba (KED) | 2.948 ppb             | 159,438 cps       | 0.5 %         |
| 139La (KED) | 0.189 ppb             | 21,647 cps        | 1.3 %         |
| 140Ce (KED) | 0.841 ppb             | 122,746 cps       | 21.0 %        |
| 141Pr (KED) | 0.043 ppb             | 7,085 cps         | 1.6 %         |
| 142Nd (KED) | 0.356 ppb             | 22,130 cps        | 0.6 %         |
| 152Sm (KED) | 0.032 ppb             | 1,889 cps         | 5.1 %         |
| 153Eu (KED) | 0.005 ppb             | 777 cps           | 7.6 %         |
| 158Gd (KED) | 0.030 ppb             | 2,244 cps         | 3.1 %         |
| 159Tb (KED) | 120.252 %             | 2,445,666 cps     | 0.8 %         |
| 164Dy (KED) | 0.020 ppb             | 1,775 cps         | 2.5 %         |
| 166Er (KED) | 0.024 ppb             | 2,639 cps         | 5.6 %         |
| 169Tm (KED) | 0.000 ppb             | 452 cps           | 9.6 %         |
| 174Yb (KED) | 0.007 ppb             | 960 cps           | 4.8 %         |
| 175Lu (KED) | -0.013 ppb            | 11,315 cps        | 1.7 %         |
| 205Tl (KED) | 0.004 ppb             | 1,122 cps         | 2.4 %         |
| 208Pb (KED) | 0.570 ppb             | 125,903 cps       | 0.8 %         |
| 209Bi (KED) | 115.823 %             | 2,099,970 cps     | 0.4 %         |
| 232Th (KED) | -0.113 ppb            | 19,630 cps        | 1.5 %         |
| 238U (KED)  | 0.013 ppb             | 4,729 cps         | 3.0 %         |

## Sample Summary

Instrument ID: iCAP Q

Analysis index: 10

Analysis name: 21ti

Analysis started at: 10/12/2021 3:27:21 PM

User name: WINDOWS-UPCI4ER\Administrator

| Category    | Concentration average | Concentration RSD |
|-------------|-----------------------|-------------------|
| 6Li (KED)   | 117.195 %             | 5.0 %             |
| 9Be (KED)   | -0.001 ppb            | 1,703.1 %         |
| 11B (KED)   | -0.560 ppb            | 133.8 %           |
| 24Mg (KED)  | 218.685 ppb           | 10.3 %            |
| 27Al (KED)  | 288.439 ppb           | 2.4 %             |
| 45Sc (KED)  | 111.747 %             | 6.1 %             |
| 51V (KED)   | 0.530 ppb             | 2.4 %             |
| 52Cr (KED)  | 1.539 ppb             | 2.7 %             |
| 55Mn (KED)  | 7.693 ppb             | 2.4 %             |
| 56Fe (KED)  | 309.387 ppb           | 1.3 %             |
| 58Ni (KED)  | 1.249 ppb             | 3.0 %             |
| 59Co (KED)  | 0.124 ppb             | 4.3 %             |
| 63Cu (KED)  | 8.390 ppb             | 1.6 %             |
| 64Zn (KED)  | 53.225 ppb            | 1.5 %             |
| 69Ga (KED)  | 1.044 ppb             | 2.4 %             |
| 75As (KED)  | 0.121 ppb             | 10.5 %            |
| 80Se (KED)  | -0.204 ppb            | 7.0 %             |
| 85Rb (KED)  | 1.542 ppb             | 3.6 %             |
| 88Sr (KED)  | 3.399 ppb             | 0.3 %             |
| 89Y (KED)   | 109.624 %             | 3.0 %             |
| 107Ag (KED) | 0.249 ppb             | 2.2 %             |
| 114Cd (KED) | -0.014 ppb            | 8.6 %             |
| 115In (KED) | 105.921 %             | 3.4 %             |
| 133Cs (KED) | 0.043 ppb             | 2.4 %             |
| 138Ba (KED) | 3.501 ppb             | 0.9 %             |
| 139La (KED) | 0.287 ppb             | 1.4 %             |
| 140Ce (KED) | 1.043 ppb             | 4.4 %             |
| 141Pr (KED) | 0.066 ppb             | 1.4 %             |
| 142Nd (KED) | 0.504 ppb             | 2.4 %             |
| 152Sm (KED) | 0.048 ppb             | 2.3 %             |
| 153Eu (KED) | 0.007 ppb             | 8.8 %             |
| 158Gd (KED) | 0.042 ppb             | 3.2 %             |
| 159Tb (KED) | 112.121 %             | 3.0 %             |
| 164Dy (KED) | 0.029 ppb             | 1.2 %             |
| 166Er (KED) | 0.025 ppb             | 9.1 %             |
| 169Tm (KED) | 0.001 ppb             | 16.0 %            |
| 174Yb (KED) | 0.011 ppb             | 6.6 %             |
| 175Lu (KED) | -0.015 ppb            | 10.2 %            |
| 205Tl (KED) | 0.003 ppb             | 3.3 %             |
| 208Pb (KED) | 0.147 ppb             | 4.5 %             |
| 209Bi (KED) | 106.272 %             | 3.3 %             |
| 232Th (KED) | -0.097 ppb            | 1.9 %             |
| 238U (KED)  | 0.015 ppb             | 4.2 %             |

| Category   | Concentration average | Intensity average | Intensity RSD |
|------------|-----------------------|-------------------|---------------|
| 6Li (KED)  | 117.195 %             | 1,606 cps         | 5.0 %         |
| 9Be (KED)  | -0.001 ppb            | 1 cps             | 173.2 %       |
| 11B (KED)  | -0.560 ppb            | 640 cps           | 8.1 %         |
| 24Mg (KED) | 218.685 ppb           | 154,516 cps       | 5.1 %         |
| 27Al (KED) | 288.439 ppb           | 53,302 cps        | 6.3 %         |

| Category    | Concentration average | Intensity average | Intensity RSD |
|-------------|-----------------------|-------------------|---------------|
| 45Sc (KED)  | 111.747 %             | 29,322 cps        | 6.1 %         |
| 51V (KED)   | 0.530 ppb             | 5,575 cps         | 3.7 %         |
| 52Cr (KED)  | 1.539 ppb             | 24,904 cps        | 4.1 %         |
| 55Mn (KED)  | 7.693 ppb             | 65,048 cps        | 3.6 %         |
| 56Fe (KED)  | 309.387 ppb           | 4,600,674 cps     | 4.7 %         |
| 58Ni (KED)  | 1.249 ppb             | 25,838 cps        | 3.9 %         |
| 59Co (KED)  | 0.124 ppb             | 3,964 cps         | 2.3 %         |
| 63Cu (KED)  | 8.390 ppb             | 193,598 cps       | 2.6 %         |
| 64Zn (KED)  | 53.225 ppb            | 406,232 cps       | 2.2 %         |
| 69Ga (KED)  | 1.044 ppb             | 8,713 cps         | 4.9 %         |
| 75As (KED)  | 0.121 ppb             | 267 cps           | 9.9 %         |
| 80Se (KED)  | -0.204 ppb            | 1,920 cps         | 2.9 %         |
| 85Rb (KED)  | 1.542 ppb             | 11,839 cps        | 4.6 %         |
| 88Sr (KED)  | 3.399 ppb             | 37,226 cps        | 2.7 %         |
| 89Y (KED)   | 109.624 %             | 260,205 cps       | 3.0 %         |
| 107Ag (KED) | 0.249 ppb             | 15,343 cps        | 2.1 %         |
| 114Cd (KED) | -0.014 ppb            | 480 cps           | 3.7 %         |
| 115In (KED) | 105.921 %             | 459,952 cps       | 3.4 %         |
| 133Cs (KED) | 0.043 ppb             | 1,737 cps         | 5.5 %         |
| 138Ba (KED) | 3.501 ppb             | 176,164 cps       | 3.9 %         |
| 139La (KED) | 0.287 ppb             | 30,494 cps        | 4.3 %         |
| 140Ce (KED) | 1.043 ppb             | 141,750 cps       | 6.1 %         |
| 141Pr (KED) | 0.066 ppb             | 9,892 cps         | 4.3 %         |
| 142Nd (KED) | 0.504 ppb             | 29,139 cps        | 1.5 %         |
| 152Sm (KED) | 0.048 ppb             | 2,556 cps         | 5.1 %         |
| 153Eu (KED) | 0.007 ppb             | 963 cps           | 4.4 %         |
| 158Gd (KED) | 0.042 ppb             | 2,891 cps         | 4.4 %         |
| 159Tb (KED) | 112.121 %             | 2,280,288 cps     | 3.0 %         |
| 164Dy (KED) | 0.029 ppb             | 2,300 cps         | 3.5 %         |
| 166Er (KED) | 0.025 ppb             | 2,592 cps         | 10.4 %        |
| 169Tm (KED) | 0.001 ppb             | 634 cps           | 8.7 %         |
| 174Yb (KED) | 0.011 ppb             | 1,288 cps         | 4.2 %         |
| 175Lu (KED) | -0.015 ppb            | 10,212 cps        | 4.7 %         |
| 205Tl (KED) | 0.003 ppb             | 842 cps           | 2.7 %         |
| 208Pb (KED) | 0.147 ppb             | 56,582 cps        | 4.0 %         |
| 209Bi (KED) | 106.272 %             | 1,926,814 cps     | 3.3 %         |
| 232Th (KED) | -0.097 ppb            | 22,432 cps        | 3.2 %         |
| 238U (KED)  | 0.015 ppb             | 5,121 cps         | 2.2 %         |

## Sample Summary

Instrument ID: iCAP Q

Analysis index: 11

Analysis name: 6ti

Analysis started at: 10/12/2021 3:31:54 PM

User name: WINDOWS-UPCI4ER\Administrator

| Category    | Concentration average | Concentration RSD |
|-------------|-----------------------|-------------------|
| 6Li (KED)   | 112.977 %             | 2.5 %             |
| 9Be (KED)   | -0.006 ppb            | 0.0 %             |
| 11B (KED)   | -1.287 ppb            | 12.5 %            |
| 24Mg (KED)  | 128.098 ppb           | 2.5 %             |
| 27Al (KED)  | 132.703 ppb           | 0.9 %             |
| 45Sc (KED)  | 110.257 %             | 1.9 %             |
| 51V (KED)   | 0.235 ppb             | 2.9 %             |
| 52Cr (KED)  | 0.973 ppb             | 0.7 %             |
| 55Mn (KED)  | 4.090 ppb             | 1.0 %             |
| 56Fe (KED)  | 155.852 ppb           | 1.1 %             |
| 58Ni (KED)  | 0.766 ppb             | 1.4 %             |
| 59Co (KED)  | 0.086 ppb             | 4.1 %             |
| 63Cu (KED)  | 20.202 ppb            | 0.6 %             |
| 64Zn (KED)  | 53.429 ppb            | 0.9 %             |
| 69Ga (KED)  | 0.580 ppb             | 0.5 %             |
| 75As (KED)  | 0.087 ppb             | 12.4 %            |
| 80Se (KED)  | 0.024 ppb             | 277.0 %           |
| 85Rb (KED)  | 0.869 ppb             | 1.7 %             |
| 88Sr (KED)  | 2.019 ppb             | 1.2 %             |
| 89Y (KED)   | 108.703 %             | 0.9 %             |
| 107Ag (KED) | 0.661 ppb             | 4.0 %             |
| 114Cd (KED) | -0.017 ppb            | 3.9 %             |
| 115In (KED) | 105.699 %             | 1.4 %             |
| 133Cs (KED) | 0.020 ppb             | 1.4 %             |
| 138Ba (KED) | 2.051 ppb             | 0.1 %             |
| 139La (KED) | 0.140 ppb             | 1.5 %             |
| 140Ce (KED) | 0.694 ppb             | 1.5 %             |
| 141Pr (KED) | 0.030 ppb             | 0.6 %             |
| 142Nd (KED) | 0.306 ppb             | 4.1 %             |
| 152Sm (KED) | 0.022 ppb             | 5.9 %             |
| 153Eu (KED) | 0.003 ppb             | 4.2 %             |
| 158Gd (KED) | 0.019 ppb             | 1.3 %             |
| 159Tb (KED) | 111.163 %             | 0.2 %             |
| 164Dy (KED) | 0.013 ppb             | 1.9 %             |
| 166Er (KED) | 0.021 ppb             | 6.6 %             |
| 169Tm (KED) | 0.000 ppb             | 12.5 %            |
| 174Yb (KED) | 0.005 ppb             | 12.5 %            |
| 175Lu (KED) | -0.018 ppb            | 11.3 %            |
| 205Tl (KED) | 0.001 ppb             | 8.0 %             |
| 208Pb (KED) | 0.055 ppb             | 17.7 %            |
| 209Bi (KED) | 105.078 %             | 1.6 %             |
| 232Th (KED) | -0.136 ppb            | 1.1 %             |
| 238U (KED)  | 0.010 ppb             | 5.0 %             |

| Category   | Concentration average | Intensity average | Intensity RSD |
|------------|-----------------------|-------------------|---------------|
| 6Li (KED)  | 112.977 %             | 1,548 cps         | 2.5 %         |
| 9Be (KED)  | -0.006 ppb            | 0 cps             |               |
| 11B (KED)  | -1.287 ppb            | 546 cps           | 4.4 %         |
| 24Mg (KED) | 128.098 ppb           | 87,619 cps        | 0.6 %         |
| 27Al (KED) | 132.703 ppb           | 24,286 cps        | 1.7 %         |

| Category    | Concentration average | Intensity average | Intensity RSD |
|-------------|-----------------------|-------------------|---------------|
| 45Sc (KED)  | 110.257 %             | 28,931 cps        | 1.9 %         |
| 51V (KED)   | 0.235 ppb             | 2,467 cps         | 4.5 %         |
| 52Cr (KED)  | 0.973 ppb             | 15,610 cps        | 2.4 %         |
| 55Mn (KED)  | 4.090 ppb             | 34,204 cps        | 0.9 %         |
| 56Fe (KED)  | 155.852 ppb           | 2,289,349 cps     | 0.9 %         |
| 58Ni (KED)  | 0.766 ppb             | 16,371 cps        | 2.2 %         |
| 59Co (KED)  | 0.086 ppb             | 2,764 cps         | 2.0 %         |
| 63Cu (KED)  | 20.202 ppb            | 460,824 cps       | 0.7 %         |
| 64Zn (KED)  | 53.429 ppb            | 404,438 cps       | 1.5 %         |
| 69Ga (KED)  | 0.580 ppb             | 4,850 cps         | 1.2 %         |
| 75As (KED)  | 0.087 ppb             | 193 cps           | 11.9 %        |
| 80Se (KED)  | 0.024 ppb             | 2,071 cps         | 3.2 %         |
| 85Rb (KED)  | 0.869 ppb             | 6,630 cps         | 2.0 %         |
| 88Sr (KED)  | 2.019 ppb             | 22,017 cps        | 0.9 %         |
| 89Y (KED)   | 108.703 %             | 258,018 cps       | 0.9 %         |
| 107Ag (KED) | 0.661 ppb             | 39,418 cps        | 3.4 %         |
| 114Cd (KED) | -0.017 ppb            | 398 cps           | 5.5 %         |
| 115In (KED) | 105.699 %             | 458,987 cps       | 1.4 %         |
| 133Cs (KED) | 0.020 ppb             | 907 cps           | 2.3 %         |
| 138Ba (KED) | 2.051 ppb             | 103,152 cps       | 0.3 %         |
| 139La (KED) | 0.140 ppb             | 14,938 cps        | 1.6 %         |
| 140Ce (KED) | 0.694 ppb             | 93,647 cps        | 1.3 %         |
| 141Pr (KED) | 0.030 ppb             | 4,670 cps         | 0.8 %         |
| 142Nd (KED) | 0.306 ppb             | 17,615 cps        | 4.2 %         |
| 152Sm (KED) | 0.022 ppb             | 1,202 cps         | 5.2 %         |
| 153Eu (KED) | 0.003 ppb             | 533 cps           | 2.3 %         |
| 158Gd (KED) | 0.019 ppb             | 1,398 cps         | 1.0 %         |
| 159Tb (KED) | 111.163 %             | 2,260,805 cps     | 0.2 %         |
| 164Dy (KED) | 0.013 ppb             | 1,124 cps         | 1.8 %         |
| 166Er (KED) | 0.021 ppb             | 2,165 cps         | 5.4 %         |
| 169Tm (KED) | 0.000 ppb             | 269 cps           | 6.1 %         |
| 174Yb (KED) | 0.005 ppb             | 633 cps           | 9.8 %         |
| 175Lu (KED) | -0.018 ppb            | 9,488 cps         | 4.1 %         |
| 205Tl (KED) | 0.001 ppb             | 502 cps           | 2.1 %         |
| 208Pb (KED) | 0.055 ppb             | 43,238 cps        | 1.6 %         |
| 209Bi (KED) | 105.078 %             | 1,905,166 cps     | 1.6 %         |
| 232Th (KED) | -0.136 ppb            | 11,226 cps        | 2.9 %         |
| 238U (KED)  | 0.010 ppb             | 3,473 cps         | 2.9 %         |

## Sample Summary

Instrument ID: iCAP Q

Analysis index: 12

Analysis name: 01963ti

Analysis started at: 10/12/2021 3:36:13 PM

User name: WINDOWS-UPCI4ER\Administrator

| Category    | Concentration average | Concentration RSD |
|-------------|-----------------------|-------------------|
| 6Li (KED)   | 129.361 %             | 3.3 %             |
| 9Be (KED)   | 0.004 ppb             | 235.3 %           |
| 11B (KED)   | -1.605 ppb            | 27.0 %            |
| 24Mg (KED)  | 109.260 ppb           | 3.6 %             |
| 27Al (KED)  | 113.872 ppb           | 0.7 %             |
| 45Sc (KED)  | 119.905 %             | 0.8 %             |
| 51V (KED)   | 0.209 ppb             | 6.8 %             |
| 52Cr (KED)  | 0.788 ppb             | 2.3 %             |
| 55Mn (KED)  | 3.458 ppb             | 1.0 %             |
| 56Fe (KED)  | 144.060 ppb           | 0.9 %             |
| 58Ni (KED)  | 0.728 ppb             | 1.6 %             |
| 59Co (KED)  | 0.056 ppb             | 2.6 %             |
| 63Cu (KED)  | 10.785 ppb            | 0.2 %             |
| 64Zn (KED)  | 52.675 ppb            | 1.5 %             |
| 69Ga (KED)  | 0.510 ppb             | 2.3 %             |
| 75As (KED)  | 0.055 ppb             | 5.3 %             |
| 80Se (KED)  | -0.335 ppb            | 6.1 %             |
| 85Rb (KED)  | 1.218 ppb             | 2.4 %             |
| 88Sr (KED)  | 1.697 ppb             | 1.4 %             |
| 89Y (KED)   | 120.906 %             | 0.8 %             |
| 107Ag (KED) | 0.522 ppb             | 1.6 %             |
| 114Cd (KED) | 0.009 ppb             | 30.3 %            |
| 115In (KED) | 116.734 %             | 2.2 %             |
| 133Cs (KED) | 0.015 ppb             | 3.9 %             |
| 138Ba (KED) | 1.776 ppb             | 1.2 %             |
| 139La (KED) | 0.117 ppb             | 2.0 %             |
| 140Ce (KED) | 0.824 ppb             | 1.0 %             |
| 141Pr (KED) | 0.026 ppb             | 2.4 %             |
| 142Nd (KED) | 0.334 ppb             | 1.7 %             |
| 152Sm (KED) | 0.017 ppb             | 2.1 %             |
| 153Eu (KED) | 0.001 ppb             | 19.2 %            |
| 158Gd (KED) | 0.017 ppb             | 12.9 %            |
| 159Tb (KED) | 122.933 %             | 1.1 %             |
| 164Dy (KED) | 0.012 ppb             | 4.6 %             |
| 166Er (KED) | 0.029 ppb             | 5.5 %             |
| 169Tm (KED) | -0.001 ppb            | 12.6 %            |
| 174Yb (KED) | 0.003 ppb             | 12.2 %            |
| 175Lu (KED) | -0.018 ppb            | 6.4 %             |
| 205Tl (KED) | 0.001 ppb             | 21.2 %            |
| 208Pb (KED) | 0.355 ppb             | 5.2 %             |
| 209Bi (KED) | 117.705 %             | 0.7 %             |
| 232Th (KED) | -0.141 ppb            | 0.5 %             |
| 238U (KED)  | 0.009 ppb             | 2.7 %             |

| Category   | Concentration average | Intensity average | Intensity RSD |
|------------|-----------------------|-------------------|---------------|
| 6Li (KED)  | 129.361 %             | 1,772 cps         | 3.3 %         |
| 9Be (KED)  | 0.004 ppb             | 2 cps             | 86.6 %        |
| 11B (KED)  | -1.605 ppb            | 587 cps           | 5.4 %         |
| 24Mg (KED) | 109.260 ppb           | 85,582 cps        | 0.6 %         |
| 27Al (KED) | 113.872 ppb           | 22,689 cps        | 0.7 %         |

| Category    | Concentration average | Intensity average | Intensity RSD |
|-------------|-----------------------|-------------------|---------------|
| 45Sc (KED)  | 119.905 %             | 31,463 cps        | 0.8 %         |
| 51V (KED)   | 0.209 ppb             | 2,384 cps         | 6.1 %         |
| 52Cr (KED)  | 0.788 ppb             | 13,765 cps        | 2.8 %         |
| 55Mn (KED)  | 3.458 ppb             | 31,469 cps        | 0.5 %         |
| 56Fe (KED)  | 144.060 ppb           | 2,302,018 cps     | 1.6 %         |
| 58Ni (KED)  | 0.728 ppb             | 17,008 cps        | 1.3 %         |
| 59Co (KED)  | 0.056 ppb             | 2,011 cps         | 3.2 %         |
| 63Cu (KED)  | 10.785 ppb            | 274,179 cps       | 0.6 %         |
| 64Zn (KED)  | 52.675 ppb            | 443,493 cps       | 0.7 %         |
| 69Ga (KED)  | 0.510 ppb             | 4,763 cps         | 2.2 %         |
| 75As (KED)  | 0.055 ppb             | 141 cps           | 5.5 %         |
| 80Se (KED)  | -0.335 ppb            | 2,011 cps         | 1.6 %         |
| 85Rb (KED)  | 1.218 ppb             | 10,321 cps        | 2.3 %         |
| 88Sr (KED)  | 1.697 ppb             | 20,634 cps        | 0.7 %         |
| 89Y (KED)   | 120.906 %             | 286,983 cps       | 0.8 %         |
| 107Ag (KED) | 0.522 ppb             | 34,542 cps        | 2.0 %         |
| 114Cd (KED) | 0.009 ppb             | 1,147 cps         | 4.3 %         |
| 115In (KED) | 116.734 %             | 506,905 cps       | 2.2 %         |
| 133Cs (KED) | 0.015 ppb             | 820 cps           | 2.3 %         |
| 138Ba (KED) | 1.776 ppb             | 99,100 cps        | 1.7 %         |
| 139La (KED) | 0.117 ppb             | 13,928 cps        | 2.7 %         |
| 140Ce (KED) | 0.824 ppb             | 122,803 cps       | 1.0 %         |
| 141Pr (KED) | 0.026 ppb             | 4,473 cps         | 1.8 %         |
| 142Nd (KED) | 0.334 ppb             | 21,259 cps        | 1.1 %         |
| 152Sm (KED) | 0.017 ppb             | 1,081 cps         | 2.0 %         |
| 153Eu (KED) | 0.001 ppb             | 410 cps           | 7.8 %         |
| 158Gd (KED) | 0.017 ppb             | 1,358 cps         | 10.7 %        |
| 159Tb (KED) | 122.933 %             | 2,500,186 cps     | 1.1 %         |
| 164Dy (KED) | 0.012 ppb             | 1,157 cps         | 3.5 %         |
| 166Er (KED) | 0.029 ppb             | 3,217 cps         | 4.3 %         |
| 169Tm (KED) | -0.001 ppb            | 228 cps           | 10.6 %        |
| 174Yb (KED) | 0.003 ppb             | 529 cps           | 7.8 %         |
| 175Lu (KED) | -0.018 ppb            | 10,497 cps        | 2.1 %         |
| 205Tl (KED) | 0.001 ppb             | 633 cps           | 11.1 %        |
| 208Pb (KED) | 0.355 ppb             | 94,724 cps        | 2.7 %         |
| 209Bi (KED) | 117.705 %             | 2,134,095 cps     | 0.7 %         |
| 232Th (KED) | -0.141 ppb            | 11,225 cps        | 2.5 %         |
| 238U (KED)  | 0.009 ppb             | 3,459 cps         | 2.9 %         |

## Sample Summary

Instrument ID: iCAP Q

Analysis index: 13

Analysis name: 01965ti

Analysis started at: 10/12/2021 3:40:28 PM

User name: WINDOWS-UPCI4ER\Administrator

| Category    | Concentration average | Concentration RSD |
|-------------|-----------------------|-------------------|
| 6Li (KED)   | 125.549 %             | 1.9 %             |
| 9Be (KED)   | 0.019 ppb             | 44.4 %            |
| 11B (KED)   | -0.434 ppb            | 182.2 %           |
| 24Mg (KED)  | 285.206 ppb           | 1.7 %             |
| 27Al (KED)  | 330.380 ppb           | 1.6 %             |
| 45Sc (KED)  | 120.708 %             | 1.3 %             |
| 51V (KED)   | 0.633 ppb             | 2.5 %             |
| 52Cr (KED)  | 1.014 ppb             | 3.0 %             |
| 55Mn (KED)  | 10.732 ppb            | 1.6 %             |
| 56Fe (KED)  | 410.712 ppb           | 2.2 %             |
| 58Ni (KED)  | 1.713 ppb             | 2.3 %             |
| 59Co (KED)  | 0.181 ppb             | 0.6 %             |
| 63Cu (KED)  | 4.933 ppb             | 0.5 %             |
| 64Zn (KED)  | 53.833 ppb            | 1.2 %             |
| 69Ga (KED)  | 1.262 ppb             | 0.6 %             |
| 75As (KED)  | 0.168 ppb             | 19.2 %            |
| 80Se (KED)  | -0.304 ppb            | 32.7 %            |
| 85Rb (KED)  | 1.346 ppb             | 2.4 %             |
| 88Sr (KED)  | 4.454 ppb             | 0.1 %             |
| 89Y (KED)   | 120.006 %             | 0.8 %             |
| 107Ag (KED) | 0.247 ppb             | 0.7 %             |
| 114Cd (KED) | 0.018 ppb             | 13.2 %            |
| 115In (KED) | 115.786 %             | 0.2 %             |
| 133Cs (KED) | 0.052 ppb             | 3.2 %             |
| 138Ba (KED) | 4.222 ppb             | 0.2 %             |
| 139La (KED) | 0.337 ppb             | 0.5 %             |
| 140Ce (KED) | 0.911 ppb             | 0.4 %             |
| 141Pr (KED) | 0.082 ppb             | 1.2 %             |
| 142Nd (KED) | 0.515 ppb             | 0.2 %             |
| 152Sm (KED) | 0.063 ppb             | 3.6 %             |
| 153Eu (KED) | 0.010 ppb             | 7.1 %             |
| 158Gd (KED) | 0.054 ppb             | 6.2 %             |
| 159Tb (KED) | 121.384 %             | 0.9 %             |
| 164Dy (KED) | 0.039 ppb             | 4.4 %             |
| 166Er (KED) | 0.024 ppb             | 3.5 %             |
| 169Tm (KED) | 0.001 ppb             | 3.7 %             |
| 174Yb (KED) | 0.015 ppb             | 3.9 %             |
| 175Lu (KED) | -0.015 ppb            | 4.8 %             |
| 205Tl (KED) | 0.004 ppb             | 9.8 %             |
| 208Pb (KED) | 0.482 ppb             | 0.9 %             |
| 209Bi (KED) | 113.719 %             | 0.7 %             |
| 232Th (KED) | -0.075 ppb            | 1.6 %             |
| 238U (KED)  | 0.020 ppb             | 1.5 %             |

| Category   | Concentration average | Intensity average | Intensity RSD |
|------------|-----------------------|-------------------|---------------|
| 6Li (KED)  | 125.549 %             | 1,720 cps         | 1.9 %         |
| 9Be (KED)  | 0.019 ppb             | 6 cps             | 34.6 %        |
| 11B (KED)  | -0.434 ppb            | 703 cps           | 14.4 %        |
| 24Mg (KED) | 285.206 ppb           | 216,486 cps       | 0.4 %         |
| 27Al (KED) | 330.380 ppb           | 65,920 cps        | 0.8 %         |

| Category    | Concentration average | Intensity average | Intensity RSD |
|-------------|-----------------------|-------------------|---------------|
| 45Sc (KED)  | 120.708 %             | 31,673 cps        | 1.3 %         |
| 51V (KED)   | 0.633 ppb             | 7,199 cps         | 2.7 %         |
| 52Cr (KED)  | 1.014 ppb             | 17,785 cps        | 2.0 %         |
| 55Mn (KED)  | 10.732 ppb            | 98,057 cps        | 0.4 %         |
| 56Fe (KED)  | 410.712 ppb           | 6,598,147 cps     | 1.1 %         |
| 58Ni (KED)  | 1.713 ppb             | 37,533 cps        | 0.9 %         |
| 59Co (KED)  | 0.181 ppb             | 6,194 cps         | 1.2 %         |
| 63Cu (KED)  | 4.933 ppb             | 125,120 cps       | 0.4 %         |
| 64Zn (KED)  | 53.833 ppb            | 449,819 cps       | 1.0 %         |
| 69Ga (KED)  | 1.262 ppb             | 11,499 cps        | 0.8 %         |
| 75As (KED)  | 0.168 ppb             | 400 cps           | 17.9 %        |
| 80Se (KED)  | -0.304 ppb            | 2,021 cps         | 4.1 %         |
| 85Rb (KED)  | 1.346 ppb             | 11,318 cps        | 1.7 %         |
| 88Sr (KED)  | 4.454 ppb             | 53,326 cps        | 0.8 %         |
| 89Y (KED)   | 120.006 %             | 284,846 cps       | 0.8 %         |
| 107Ag (KED) | 0.247 ppb             | 16,669 cps        | 0.8 %         |
| 114Cd (KED) | 0.018 ppb             | 1,378 cps         | 4.7 %         |
| 115In (KED) | 115.786 %             | 502,789 cps       | 0.2 %         |
| 133Cs (KED) | 0.052 ppb             | 2,234 cps         | 2.8 %         |
| 138Ba (KED) | 4.222 ppb             | 229,500 cps       | 0.7 %         |
| 139La (KED) | 0.337 ppb             | 38,720 cps        | 0.5 %         |
| 140Ce (KED) | 0.911 ppb             | 134,127 cps       | 1.3 %         |
| 141Pr (KED) | 0.082 ppb             | 13,214 cps        | 1.1 %         |
| 142Nd (KED) | 0.515 ppb             | 32,236 cps        | 1.1 %         |
| 152Sm (KED) | 0.063 ppb             | 3,571 cps         | 2.7 %         |
| 153Eu (KED) | 0.010 ppb             | 1,339 cps         | 6.4 %         |
| 158Gd (KED) | 0.054 ppb             | 4,007 cps         | 6.1 %         |
| 159Tb (KED) | 121.384 %             | 2,468,675 cps     | 0.9 %         |
| 164Dy (KED) | 0.039 ppb             | 3,336 cps         | 3.6 %         |
| 166Er (KED) | 0.024 ppb             | 2,685 cps         | 4.0 %         |
| 169Tm (KED) | 0.001 ppb             | 832 cps           | 2.7 %         |
| 174Yb (KED) | 0.015 ppb             | 1,831 cps         | 3.9 %         |
| 175Lu (KED) | -0.015 ppb            | 10,913 cps        | 2.2 %         |
| 205Tl (KED) | 0.004 ppb             | 1,066 cps         | 6.3 %         |
| 208Pb (KED) | 0.482 ppb             | 110,403 cps       | 1.1 %         |
| 209Bi (KED) | 113.719 %             | 2,061,828 cps     | 0.7 %         |
| 232Th (KED) | -0.075 ppb            | 30,692 cps        | 1.8 %         |
| 238U (KED)  | 0.020 ppb             | 7,093 cps         | 1.0 %         |

## Sample Summary

Instrument ID: iCAP Q

Analysis index: 14

Analysis name: 1497jian

Analysis started at: 10/12/2021 3:44:38 PM

User name: WINDOWS-UPCI4ER\Administrator

| Category    | Concentration average | Concentration RSD |
|-------------|-----------------------|-------------------|
| 6Li (KED)   | 152.478 %             | 2.4 %             |
| 9Be (KED)   | 0.010 ppb             | 183.6 %           |
| 11B (KED)   | 3.448 ppb             | 5.7 %             |
| 24Mg (KED)  | 199.028 ppb           | 1.8 %             |
| 27Al (KED)  | 163.474 ppb           | 1.5 %             |
| 45Sc (KED)  | 145.073 %             | 2.1 %             |
| 51V (KED)   | 0.354 ppb             | 5.1 %             |
| 52Cr (KED)  | 0.977 ppb             | 0.5 %             |
| 55Mn (KED)  | 5.825 ppb             | 1.6 %             |
| 56Fe (KED)  | 195.460 ppb           | 0.6 %             |
| 58Ni (KED)  | 0.906 ppb             | 2.0 %             |
| 59Co (KED)  | 0.081 ppb             | 1.2 %             |
| 63Cu (KED)  | 5.099 ppb             | 1.6 %             |
| 64Zn (KED)  | 49.256 ppb            | 0.8 %             |
| 69Ga (KED)  | 0.669 ppb             | 1.1 %             |
| 75As (KED)  | 0.094 ppb             | 4.6 %             |
| 80Se (KED)  | -0.799 ppb            | 14.8 %            |
| 85Rb (KED)  | 1.271 ppb             | 2.6 %             |
| 88Sr (KED)  | 2.798 ppb             | 0.5 %             |
| 89Y (KED)   | 144.713 %             | 1.2 %             |
| 107Ag (KED) | 0.271 ppb             | 2.5 %             |
| 114Cd (KED) | -0.012 ppb            | 6.7 %             |
| 115In (KED) | 140.734 %             | 1.6 %             |
| 133Cs (KED) | 0.024 ppb             | 4.7 %             |
| 138Ba (KED) | 2.378 ppb             | 2.1 %             |
| 139La (KED) | 0.171 ppb             | 1.2 %             |
| 140Ce (KED) | 0.588 ppb             | 5.6 %             |
| 141Pr (KED) | 0.041 ppb             | 1.9 %             |
| 142Nd (KED) | 0.294 ppb             | 1.9 %             |
| 152Sm (KED) | 0.028 ppb             | 3.4 %             |
| 153Eu (KED) | 0.003 ppb             | 9.8 %             |
| 158Gd (KED) | 0.025 ppb             | 5.5 %             |
| 159Tb (KED) | 146.541 %             | 1.3 %             |
| 164Dy (KED) | 0.017 ppb             | 4.3 %             |
| 166Er (KED) | 0.015 ppb             | 5.3 %             |
| 169Tm (KED) | 0.000 ppb             | 314.9 %           |
| 174Yb (KED) | 0.006 ppb             | 16.4 %            |
| 175Lu (KED) | -0.018 ppb            | 3.4 %             |
| 205Tl (KED) | 0.002 ppb             | 18.1 %            |
| 208Pb (KED) | 0.195 ppb             | 1.1 %             |
| 209Bi (KED) | 137.840 %             | 2.0 %             |
| 232Th (KED) | -0.132 ppb            | 0.7 %             |
| 238U (KED)  | 0.011 ppb             | 4.2 %             |

| Category   | Concentration average | Intensity average | Intensity RSD |
|------------|-----------------------|-------------------|---------------|
| 6Li (KED)  | 152.478 %             | 2,089 cps         | 2.4 %         |
| 9Be (KED)  | 0.010 ppb             | 4 cps             | 114.6 %       |
| 11B (KED)  | 3.448 ppb             | 1,383 cps         | 1.9 %         |
| 24Mg (KED) | 199.028 ppb           | 183,566 cps       | 0.8 %         |
| 27Al (KED) | 163.474 ppb           | 39,312 cps        | 1.8 %         |

| Category    | Concentration average | Intensity average | Intensity RSD |
|-------------|-----------------------|-------------------|---------------|
| 45Sc (KED)  | 145.073 %             | 38,067 cps        | 2.1 %         |
| 51V (KED)   | 0.354 ppb             | 4,849 cps         | 3.4 %         |
| 52Cr (KED)  | 0.977 ppb             | 20,620 cps        | 1.8 %         |
| 55Mn (KED)  | 5.825 ppb             | 64,027 cps        | 0.5 %         |
| 56Fe (KED)  | 195.460 ppb           | 3,776,814 cps     | 1.6 %         |
| 58Ni (KED)  | 0.906 ppb             | 25,009 cps        | 1.2 %         |
| 59Co (KED)  | 0.081 ppb             | 3,448 cps         | 1.6 %         |
| 63Cu (KED)  | 5.099 ppb             | 155,892 cps       | 1.8 %         |
| 64Zn (KED)  | 49.256 ppb            | 496,613 cps       | 0.6 %         |
| 69Ga (KED)  | 0.669 ppb             | 7,427 cps         | 0.7 %         |
| 75As (KED)  | 0.094 ppb             | 278 cps           | 3.9 %         |
| 80Se (KED)  | -0.799 ppb            | 1,957 cps         | 6.7 %         |
| 85Rb (KED)  | 1.271 ppb             | 12,891 cps        | 1.9 %         |
| 88Sr (KED)  | 2.798 ppb             | 40,506 cps        | 1.2 %         |
| 89Y (KED)   | 144.713 %             | 343,490 cps       | 1.2 %         |
| 107Ag (KED) | 0.271 ppb             | 22,114 cps        | 3.2 %         |
| 114Cd (KED) | -0.012 ppb            | 689 cps           | 2.7 %         |
| 115In (KED) | 140.734 %             | 611,120 cps       | 1.6 %         |
| 133Cs (KED) | 0.024 ppb             | 1,383 cps         | 2.4 %         |
| 138Ba (KED) | 2.378 ppb             | 157,243 cps       | 2.4 %         |
| 139La (KED) | 0.171 ppb             | 23,972 cps        | 1.2 %         |
| 140Ce (KED) | 0.588 ppb             | 104,630 cps       | 4.6 %         |
| 141Pr (KED) | 0.041 ppb             | 8,174 cps         | 2.0 %         |
| 142Nd (KED) | 0.294 ppb             | 22,308 cps        | 2.2 %         |
| 152Sm (KED) | 0.028 ppb             | 2,005 cps         | 2.0 %         |
| 153Eu (KED) | 0.003 ppb             | 753 cps           | 7.3 %         |
| 158Gd (KED) | 0.025 ppb             | 2,289 cps         | 5.3 %         |
| 159Tb (KED) | 146.541 %             | 2,980,330 cps     | 1.3 %         |
| 164Dy (KED) | 0.017 ppb             | 1,811 cps         | 3.6 %         |
| 166Er (KED) | 0.015 ppb             | 2,142 cps         | 3.0 %         |
| 169Tm (KED) | 0.000 ppb             | 482 cps           | 24.1 %        |
| 174Yb (KED) | 0.006 ppb             | 1,033 cps         | 12.7 %        |
| 175Lu (KED) | -0.018 ppb            | 12,381 cps        | 2.5 %         |
| 205Tl (KED) | 0.002 ppb             | 844 cps           | 10.1 %        |
| 208Pb (KED) | 0.195 ppb             | 81,980 cps        | 2.4 %         |
| 209Bi (KED) | 137.840 %             | 2,499,154 cps     | 2.0 %         |
| 232Th (KED) | -0.132 ppb            | 16,346 cps        | 1.7 %         |
| 238U (KED)  | 0.011 ppb             | 5,068 cps         | 1.8 %         |

## Sample Summary

Instrument ID: iCAP Q

Analysis index: 15

Analysis name: 1373jian

Analysis started at: 10/12/2021 3:48:23 PM

User name: WINDOWS-UPCI4ER\Administrator

| Category    | Concentration average | Concentration RSD |
|-------------|-----------------------|-------------------|
| 6Li (KED)   | 143.637 %             | 2.0 %             |
| 9Be (KED)   | 0.007 ppb             | 190.1 %           |
| 11B (KED)   | -2.594 ppb            | 11.3 %            |
| 24Mg (KED)  | 269.765 ppb           | 1.0 %             |
| 27Al (KED)  | 255.860 ppb           | 0.8 %             |
| 45Sc (KED)  | 138.061 %             | 1.4 %             |
| 51V (KED)   | 0.526 ppb             | 11.6 %            |
| 52Cr (KED)  | 1.135 ppb             | 1.5 %             |
| 55Mn (KED)  | 8.534 ppb             | 0.7 %             |
| 56Fe (KED)  | 381.168 ppb           | 1.4 %             |
| 58Ni (KED)  | 1.457 ppb             | 2.7 %             |
| 59Co (KED)  | 0.114 ppb             | 1.7 %             |
| 63Cu (KED)  | 7.680 ppb             | 0.2 %             |
| 64Zn (KED)  | 48.106 ppb            | 1.3 %             |
| 69Ga (KED)  | 1.069 ppb             | 0.2 %             |
| 75As (KED)  | 0.121 ppb             | 6.3 %             |
| 80Se (KED)  | -0.668 ppb            | 14.3 %            |
| 85Rb (KED)  | 1.336 ppb             | 2.1 %             |
| 88Sr (KED)  | 4.111 ppb             | 1.7 %             |
| 89Y (KED)   | 138.058 %             | 1.7 %             |
| 107Ag (KED) | 0.568 ppb             | 1.4 %             |
| 114Cd (KED) | 0.025 ppb             | 15.8 %            |
| 115In (KED) | 132.302 %             | 1.7 %             |
| 133Cs (KED) | 0.041 ppb             | 5.1 %             |
| 138Ba (KED) | 3.737 ppb             | 0.8 %             |
| 139La (KED) | 0.276 ppb             | 1.9 %             |
| 140Ce (KED) | 0.690 ppb             | 2.0 %             |
| 141Pr (KED) | 0.062 ppb             | 1.5 %             |
| 142Nd (KED) | 0.388 ppb             | 1.0 %             |
| 152Sm (KED) | 0.045 ppb             | 3.6 %             |
| 153Eu (KED) | 0.007 ppb             | 11.4 %            |
| 158Gd (KED) | 0.037 ppb             | 1.8 %             |
| 159Tb (KED) | 139.125 %             | 0.9 %             |
| 164Dy (KED) | 0.027 ppb             | 0.6 %             |
| 166Er (KED) | 0.019 ppb             | 3.4 %             |
| 169Tm (KED) | 0.001 ppb             | 17.2 %            |
| 174Yb (KED) | 0.011 ppb             | 6.1 %             |
| 175Lu (KED) | -0.017 ppb            | 8.9 %             |
| 205Tl (KED) | 0.003 ppb             | 7.4 %             |
| 208Pb (KED) | 0.657 ppb             | 1.1 %             |
| 209Bi (KED) | 131.653 %             | 0.5 %             |
| 232Th (KED) | -0.109 ppb            | 0.8 %             |
| 238U (KED)  | 0.015 ppb             | 4.1 %             |

| Category   | Concentration average | Intensity average | Intensity RSD |
|------------|-----------------------|-------------------|---------------|
| 6Li (KED)  | 143.637 %             | 1,968 cps         | 2.0 %         |
| 9Be (KED)  | 0.007 ppb             | 3 cps             | 100.0 %       |
| 11B (KED)  | -2.594 ppb            | 526 cps           | 9.1 %         |
| 24Mg (KED) | 269.765 ppb           | 234,302 cps       | 1.2 %         |
| 27Al (KED) | 255.860 ppb           | 58,440 cps        | 0.7 %         |

| Category    | Concentration average | Intensity average | Intensity RSD |
|-------------|-----------------------|-------------------|---------------|
| 45Sc (KED)  | 138.061 %             | 36,227 cps        | 1.4 %         |
| 51V (KED)   | 0.526 ppb             | 6,855 cps         | 12.9 %        |
| 52Cr (KED)  | 1.135 ppb             | 22,766 cps        | 2.5 %         |
| 55Mn (KED)  | 8.534 ppb             | 89,224 cps        | 1.0 %         |
| 56Fe (KED)  | 381.168 ppb           | 7,006,202 cps     | 2.7 %         |
| 58Ni (KED)  | 1.457 ppb             | 36,873 cps        | 1.9 %         |
| 59Co (KED)  | 0.114 ppb             | 4,515 cps         | 2.9 %         |
| 63Cu (KED)  | 7.680 ppb             | 223,320 cps       | 1.6 %         |
| 64Zn (KED)  | 48.106 ppb            | 462,759 cps       | 0.8 %         |
| 69Ga (KED)  | 1.069 ppb             | 11,224 cps        | 1.6 %         |
| 75As (KED)  | 0.121 ppb             | 336 cps           | 7.2 %         |
| 80Se (KED)  | -0.668 ppb            | 1,987 cps         | 3.8 %         |
| 85Rb (KED)  | 1.336 ppb             | 12,922 cps        | 3.5 %         |
| 88Sr (KED)  | 4.111 ppb             | 56,643 cps        | 3.2 %         |
| 89Y (KED)   | 138.058 %             | 327,695 cps       | 1.7 %         |
| 107Ag (KED) | 0.568 ppb             | 42,559 cps        | 1.6 %         |
| 114Cd (KED) | 0.025 ppb             | 1,788 cps         | 8.3 %         |
| 115In (KED) | 132.302 %             | 574,506 cps       | 1.7 %         |
| 133Cs (KED) | 0.041 ppb             | 2,091 cps         | 4.0 %         |
| 138Ba (KED) | 3.737 ppb             | 233,151 cps       | 1.2 %         |
| 139La (KED) | 0.276 ppb             | 36,468 cps        | 1.1 %         |
| 140Ce (KED) | 0.690 ppb             | 116,574 cps       | 2.4 %         |
| 141Pr (KED) | 0.062 ppb             | 11,522 cps        | 0.6 %         |
| 142Nd (KED) | 0.388 ppb             | 27,861 cps        | 0.8 %         |
| 152Sm (KED) | 0.045 ppb             | 2,964 cps         | 2.5 %         |
| 153Eu (KED) | 0.007 ppb             | 1,152 cps         | 9.3 %         |
| 158Gd (KED) | 0.037 ppb             | 3,212 cps         | 0.8 %         |
| 159Tb (KED) | 139.125 %             | 2,829,503 cps     | 0.9 %         |
| 164Dy (KED) | 0.027 ppb             | 2,687 cps         | 1.1 %         |
| 166Er (KED) | 0.019 ppb             | 2,471 cps         | 2.1 %         |
| 169Tm (KED) | 0.001 ppb             | 694 cps           | 4.1 %         |
| 174Yb (KED) | 0.011 ppb             | 1,623 cps         | 6.2 %         |
| 175Lu (KED) | -0.017 ppb            | 12,087 cps        | 3.0 %         |
| 205Tl (KED) | 0.003 ppb             | 1,143 cps         | 5.4 %         |
| 208Pb (KED) | 0.657 ppb             | 158,035 cps       | 1.1 %         |
| 209Bi (KED) | 131.653 %             | 2,386,980 cps     | 0.5 %         |
| 232Th (KED) | -0.109 ppb            | 23,634 cps        | 1.5 %         |
| 238U (KED)  | 0.015 ppb             | 6,409 cps         | 3.9 %         |

## Sample Summary

Instrument ID: iCAP Q

Analysis index: 16

Analysis name: 1481jian

Analysis started at: 10/12/2021 3:52:38 PM

User name: WINDOWS-UPCI4ER\Administrator

| Category    | Concentration average | Concentration RSD |
|-------------|-----------------------|-------------------|
| 6Li (KED)   | 118.655 %             | 4.5 %             |
| 9Be (KED)   | 0.010 ppb             | 162.3 %           |
| 11B (KED)   | -0.047 ppb            | 410.3 %           |
| 24Mg (KED)  | 178.374 ppb           | 4.6 %             |
| 27Al (KED)  | 143.290 ppb           | 2.7 %             |
| 45Sc (KED)  | 121.468 %             | 1.1 %             |
| 51V (KED)   | 0.278 ppb             | 2.7 %             |
| 52Cr (KED)  | 1.091 ppb             | 0.8 %             |
| 55Mn (KED)  | 4.947 ppb             | 2.1 %             |
| 56Fe (KED)  | 165.993 ppb           | 0.4 %             |
| 58Ni (KED)  | 0.727 ppb             | 3.0 %             |
| 59Co (KED)  | 0.068 ppb             | 4.8 %             |
| 63Cu (KED)  | 5.234 ppb             | 1.6 %             |
| 64Zn (KED)  | 51.451 ppb            | 1.4 %             |
| 69Ga (KED)  | 0.614 ppb             | 3.5 %             |
| 75As (KED)  | 0.296 ppb             | 2.5 %             |
| 80Se (KED)  | -0.337 ppb            | 23.7 %            |
| 85Rb (KED)  | 1.360 ppb             | 1.5 %             |
| 88Sr (KED)  | 2.529 ppb             | 0.9 %             |
| 89Y (KED)   | 117.688 %             | 0.7 %             |
| 107Ag (KED) | 0.177 ppb             | 1.2 %             |
| 114Cd (KED) | -0.020 ppb            | 9.1 %             |
| 115In (KED) | 114.957 %             | 0.8 %             |
| 133Cs (KED) | 0.019 ppb             | 3.4 %             |
| 138Ba (KED) | 2.038 ppb             | 2.2 %             |
| 139La (KED) | 0.148 ppb             | 1.6 %             |
| 140Ce (KED) | 0.417 ppb             | 1.3 %             |
| 141Pr (KED) | 0.035 ppb             | 2.4 %             |
| 142Nd (KED) | 0.231 ppb             | 1.8 %             |
| 152Sm (KED) | 0.026 ppb             | 5.6 %             |
| 153Eu (KED) | 0.003 ppb             | 22.9 %            |
| 158Gd (KED) | 0.022 ppb             | 8.7 %             |
| 159Tb (KED) | 120.425 %             | 0.6 %             |
| 164Dy (KED) | 0.016 ppb             | 1.7 %             |
| 166Er (KED) | 0.011 ppb             | 8.2 %             |
| 169Tm (KED) | 0.000 ppb             | 11.0 %            |
| 174Yb (KED) | 0.005 ppb             | 7.8 %             |
| 175Lu (KED) | -0.018 ppb            | 4.3 %             |
| 205Tl (KED) | 0.002 ppb             | 9.8 %             |
| 208Pb (KED) | 0.088 ppb             | 6.9 %             |
| 209Bi (KED) | 113.848 %             | 0.9 %             |
| 232Th (KED) | -0.130 ppb            | 0.3 %             |
| 238U (KED)  | 0.011 ppb             | 6.5 %             |

| Category   | Concentration average | Intensity average | Intensity RSD |
|------------|-----------------------|-------------------|---------------|
| 6Li (KED)  | 118.655 %             | 1,626 cps         | 4.5 %         |
| 9Be (KED)  | 0.010 ppb             | 3 cps             | 100.0 %       |
| 11B (KED)  | -0.047 ppb            | 704 cps           | 3.2 %         |
| 24Mg (KED) | 178.374 ppb           | 127,912 cps       | 0.9 %         |
| 27Al (KED) | 143.290 ppb           | 28,871 cps        | 1.6 %         |

| Category    | Concentration average | Intensity average | Intensity RSD |
|-------------|-----------------------|-------------------|---------------|
| 45Sc (KED)  | 121.468 %             | 31,873 cps        | 1.1 %         |
| 51V (KED)   | 0.278 ppb             | 3,205 cps         | 2.4 %         |
| 52Cr (KED)  | 1.091 ppb             | 19,243 cps        | 1.3 %         |
| 55Mn (KED)  | 4.947 ppb             | 45,552 cps        | 1.4 %         |
| 56Fe (KED)  | 165.993 ppb           | 2,686,256 cps     | 0.8 %         |
| 58Ni (KED)  | 0.727 ppb             | 17,199 cps        | 1.8 %         |
| 59Co (KED)  | 0.068 ppb             | 2,432 cps         | 4.8 %         |
| 63Cu (KED)  | 5.234 ppb             | 130,103 cps       | 1.3 %         |
| 64Zn (KED)  | 51.451 ppb            | 421,734 cps       | 0.7 %         |
| 69Ga (KED)  | 0.614 ppb             | 5,558 cps         | 2.7 %         |
| 75As (KED)  | 0.296 ppb             | 684 cps           | 3.1 %         |
| 80Se (KED)  | -0.337 ppb            | 1,957 cps         | 3.5 %         |
| 85Rb (KED)  | 1.360 ppb             | 11,213 cps        | 2.1 %         |
| 88Sr (KED)  | 2.529 ppb             | 29,799 cps        | 0.6 %         |
| 89Y (KED)   | 117.688 %             | 279,345 cps       | 0.7 %         |
| 107Ag (KED) | 0.177 ppb             | 12,104 cps        | 1.7 %         |
| 114Cd (KED) | -0.020 ppb            | 369 cps           | 13.2 %        |
| 115In (KED) | 114.957 %             | 499,188 cps       | 0.8 %         |
| 133Cs (KED) | 0.019 ppb             | 962 cps           | 2.2 %         |
| 138Ba (KED) | 2.038 ppb             | 111,068 cps       | 1.5 %         |
| 139La (KED) | 0.148 ppb             | 17,122 cps        | 1.1 %         |
| 140Ce (KED) | 0.417 ppb             | 61,230 cps        | 1.1 %         |
| 141Pr (KED) | 0.035 ppb             | 5,774 cps         | 1.9 %         |
| 142Nd (KED) | 0.231 ppb             | 14,454 cps        | 1.6 %         |
| 152Sm (KED) | 0.026 ppb             | 1,535 cps         | 4.6 %         |
| 153Eu (KED) | 0.003 ppb             | 570 cps           | 13.8 %        |
| 158Gd (KED) | 0.022 ppb             | 1,732 cps         | 7.5 %         |
| 159Tb (KED) | 120.425 %             | 2,449,186 cps     | 0.6 %         |
| 164Dy (KED) | 0.016 ppb             | 1,446 cps         | 0.9 %         |
| 166Er (KED) | 0.011 ppb             | 1,432 cps         | 6.7 %         |
| 169Tm (KED) | 0.000 ppb             | 303 cps           | 4.0 %         |
| 174Yb (KED) | 0.005 ppb             | 672 cps           | 5.6 %         |
| 175Lu (KED) | -0.018 ppb            | 10,222 cps        | 1.4 %         |
| 205Tl (KED) | 0.002 ppb             | 682 cps           | 5.6 %         |
| 208Pb (KED) | 0.088 ppb             | 51,669 cps        | 2.1 %         |
| 209Bi (KED) | 113.848 %             | 2,064,160 cps     | 0.9 %         |
| 232Th (KED) | -0.130 ppb            | 13,934 cps        | 1.1 %         |
| 238U (KED)  | 0.011 ppb             | 4,111 cps         | 5.1 %         |

## Sample Summary

Instrument ID: iCAP Q

Analysis index: 17

Analysis name: 81474jian

Analysis started at: 10/12/2021 3:56:28 PM

User name: WINDOWS-UPCI4ER\Administrator

| Category    | Concentration average | Concentration RSD |
|-------------|-----------------------|-------------------|
| 6Li (KED)   | 124.738 %             | 7.2 %             |
| 9Be (KED)   | -0.006 ppb            | 0.0 %             |
| 11B (KED)   | -0.603 ppb            | 41.3 %            |
| 24Mg (KED)  | 156.320 ppb           | 7.0 %             |
| 27Al (KED)  | 141.247 ppb           | 1.8 %             |
| 45Sc (KED)  | 117.401 %             | 2.3 %             |
| 51V (KED)   | 0.267 ppb             | 5.1 %             |
| 52Cr (KED)  | 0.618 ppb             | 0.5 %             |
| 55Mn (KED)  | 4.787 ppb             | 2.8 %             |
| 56Fe (KED)  | 169.122 ppb           | 2.7 %             |
| 58Ni (KED)  | 0.679 ppb             | 2.3 %             |
| 59Co (KED)  | 0.064 ppb             | 8.2 %             |
| 63Cu (KED)  | 8.311 ppb             | 2.6 %             |
| 64Zn (KED)  | 50.515 ppb            | 1.9 %             |
| 69Ga (KED)  | 0.661 ppb             | 3.8 %             |
| 75As (KED)  | 0.077 ppb             | 16.8 %            |
| 80Se (KED)  | -0.264 ppb            | 47.6 %            |
| 85Rb (KED)  | 1.038 ppb             | 3.2 %             |
| 88Sr (KED)  | 2.305 ppb             | 1.3 %             |
| 89Y (KED)   | 116.571 %             | 0.7 %             |
| 107Ag (KED) | 0.467 ppb             | 2.0 %             |
| 114Cd (KED) | -0.015 ppb            | 4.8 %             |
| 115In (KED) | 112.349 %             | 0.4 %             |
| 133Cs (KED) | 0.023 ppb             | 10.1 %            |
| 138Ba (KED) | 2.294 ppb             | 0.2 %             |
| 139La (KED) | 0.132 ppb             | 2.1 %             |
| 140Ce (KED) | 0.479 ppb             | 2.6 %             |
| 141Pr (KED) | 0.030 ppb             | 5.7 %             |
| 142Nd (KED) | 0.261 ppb             | 13.8 %            |
| 152Sm (KED) | 0.021 ppb             | 4.3 %             |
| 153Eu (KED) | 0.003 ppb             | 5.7 %             |
| 158Gd (KED) | 0.019 ppb             | 0.4 %             |
| 159Tb (KED) | 117.268 %             | 1.5 %             |
| 164Dy (KED) | 0.013 ppb             | 6.0 %             |
| 166Er (KED) | 0.013 ppb             | 5.9 %             |
| 169Tm (KED) | 0.000 ppb             | 16.0 %            |
| 174Yb (KED) | 0.004 ppb             | 22.1 %            |
| 175Lu (KED) | -0.020 ppb            | 4.0 %             |
| 205Tl (KED) | 0.002 ppb             | 9.5 %             |
| 208Pb (KED) | 0.100 ppb             | 3.3 %             |
| 209Bi (KED) | 113.270 %             | 0.5 %             |
| 232Th (KED) | -0.138 ppb            | 0.5 %             |
| 238U (KED)  | 0.009 ppb             | 1.6 %             |

| Category   | Concentration average | Intensity average | Intensity RSD |
|------------|-----------------------|-------------------|---------------|
| 6Li (KED)  | 124.738 %             | 1,709 cps         | 7.2 %         |
| 9Be (KED)  | -0.006 ppb            | 0 cps             |               |
| 11B (KED)  | -0.603 ppb            | 680 cps           | 11.2 %        |
| 24Mg (KED) | 156.320 ppb           | 117,644 cps       | 0.4 %         |
| 27Al (KED) | 141.247 ppb           | 27,507 cps        | 0.6 %         |

| Category    | Concentration average | Intensity average | Intensity RSD |
|-------------|-----------------------|-------------------|---------------|
| 45Sc (KED)  | 117.401 %             | 30,806 cps        | 2.3 %         |
| 51V (KED)   | 0.267 ppb             | 2,976 cps         | 5.6 %         |
| 52Cr (KED)  | 0.618 ppb             | 10,619 cps        | 2.8 %         |
| 55Mn (KED)  | 4.787 ppb             | 42,591 cps        | 1.1 %         |
| 56Fe (KED)  | 169.122 ppb           | 2,644,544 cps     | 2.0 %         |
| 58Ni (KED)  | 0.679 ppb             | 15,656 cps        | 0.4 %         |
| 59Co (KED)  | 0.064 ppb             | 2,237 cps         | 7.3 %         |
| 63Cu (KED)  | 8.311 ppb             | 203,956 cps       | 2.2 %         |
| 64Zn (KED)  | 50.515 ppb            | 410,192 cps       | 1.7 %         |
| 69Ga (KED)  | 0.661 ppb             | 5,915 cps         | 4.1 %         |
| 75As (KED)  | 0.077 ppb             | 184 cps           | 16.4 %        |
| 80Se (KED)  | -0.264 ppb            | 1,995 cps         | 4.3 %         |
| 85Rb (KED)  | 1.038 ppb             | 8,487 cps         | 3.4 %         |
| 88Sr (KED)  | 2.305 ppb             | 26,930 cps        | 1.4 %         |
| 89Y (KED)   | 116.571 %             | 276,694 cps       | 0.7 %         |
| 107Ag (KED) | 0.467 ppb             | 29,823 cps        | 1.5 %         |
| 114Cd (KED) | -0.015 ppb            | 473 cps           | 4.4 %         |
| 115In (KED) | 112.349 %             | 487,861 cps       | 0.4 %         |
| 133Cs (KED) | 0.023 ppb             | 1,092 cps         | 8.4 %         |
| 138Ba (KED) | 2.294 ppb             | 121,456 cps       | 1.7 %         |
| 139La (KED) | 0.132 ppb             | 14,887 cps        | 1.5 %         |
| 140Ce (KED) | 0.479 ppb             | 68,349 cps        | 1.1 %         |
| 141Pr (KED) | 0.030 ppb             | 4,923 cps         | 6.0 %         |
| 142Nd (KED) | 0.261 ppb             | 15,871 cps        | 14.4 %        |
| 152Sm (KED) | 0.021 ppb             | 1,225 cps         | 2.5 %         |
| 153Eu (KED) | 0.003 ppb             | 518 cps           | 2.9 %         |
| 158Gd (KED) | 0.019 ppb             | 1,416 cps         | 1.6 %         |
| 159Tb (KED) | 117.268 %             | 2,384,984 cps     | 1.5 %         |
| 164Dy (KED) | 0.013 ppb             | 1,160 cps         | 6.6 %         |
| 166Er (KED) | 0.013 ppb             | 1,501 cps         | 5.4 %         |
| 169Tm (KED) | 0.000 ppb             | 299 cps           | 6.1 %         |
| 174Yb (KED) | 0.004 ppb             | 579 cps           | 15.2 %        |
| 175Lu (KED) | -0.020 ppb            | 9,583 cps         | 1.5 %         |
| 205Tl (KED) | 0.002 ppb             | 637 cps           | 5.3 %         |
| 208Pb (KED) | 0.100 ppb             | 53,222 cps        | 0.6 %         |
| 209Bi (KED) | 113.270 %             | 2,053,692 cps     | 0.5 %         |
| 232Th (KED) | -0.138 ppb            | 11,635 cps        | 1.7 %         |
| 238U (KED)  | 0.009 ppb             | 3,499 cps         | 1.3 %         |

## Sample Summary

Instrument ID: iCAP Q

Analysis index: 18

Analysis name: 2120jian

Analysis started at: 10/12/2021 4:00:32 PM

User name: WINDOWS-UPCI4ER\Administrator

| Category    | Concentration average | Concentration RSD |
|-------------|-----------------------|-------------------|
| 6Li (KED)   | 126.198 %             | 2.5 %             |
| 9Be (KED)   | 0.004 ppb             | 467.6 %           |
| 11B (KED)   | 1.125 ppb             | 22.0 %            |
| 24Mg (KED)  | 180.854 ppb           | 1.9 %             |
| 27Al (KED)  | 134.525 ppb           | 1.5 %             |
| 45Sc (KED)  | 123.077 %             | 1.3 %             |
| 51V (KED)   | 0.269 ppb             | 1.9 %             |
| 52Cr (KED)  | 0.724 ppb             | 1.1 %             |
| 55Mn (KED)  | 4.987 ppb             | 0.3 %             |
| 56Fe (KED)  | 161.646 ppb           | 1.5 %             |
| 58Ni (KED)  | 0.675 ppb             | 3.7 %             |
| 59Co (KED)  | 0.069 ppb             | 2.2 %             |
| 63Cu (KED)  | 10.055 ppb            | 1.4 %             |
| 64Zn (KED)  | 50.897 ppb            | 0.9 %             |
| 69Ga (KED)  | 0.677 ppb             | 1.9 %             |
| 75As (KED)  | 0.093 ppb             | 3.6 %             |
| 80Se (KED)  | -0.270 ppb            | 33.9 %            |
| 85Rb (KED)  | 1.615 ppb             | 2.7 %             |
| 88Sr (KED)  | 2.595 ppb             | 1.3 %             |
| 89Y (KED)   | 119.960 %             | 0.9 %             |
| 107Ag (KED) | 0.522 ppb             | 0.9 %             |
| 114Cd (KED) | -0.008 ppb            | 14.1 %            |
| 115In (KED) | 116.669 %             | 1.3 %             |
| 133Cs (KED) | 0.019 ppb             | 7.6 %             |
| 138Ba (KED) | 2.347 ppb             | 1.2 %             |
| 139La (KED) | 0.180 ppb             | 2.3 %             |
| 140Ce (KED) | 0.761 ppb             | 3.2 %             |
| 141Pr (KED) | 0.036 ppb             | 5.3 %             |
| 142Nd (KED) | 0.338 ppb             | 2.1 %             |
| 152Sm (KED) | 0.025 ppb             | 3.9 %             |
| 153Eu (KED) | 0.003 ppb             | 3.6 %             |
| 158Gd (KED) | 0.022 ppb             | 5.2 %             |
| 159Tb (KED) | 121.180 %             | 2.4 %             |
| 164Dy (KED) | 0.016 ppb             | 4.6 %             |
| 166Er (KED) | 0.021 ppb             | 5.6 %             |
| 169Tm (KED) | 0.000 ppb             | 32.9 %            |
| 174Yb (KED) | 0.005 ppb             | 3.9 %             |
| 175Lu (KED) | -0.018 ppb            | 0.9 %             |
| 205Tl (KED) | 0.002 ppb             | 12.3 %            |
| 208Pb (KED) | 0.084 ppb             | 11.5 %            |
| 209Bi (KED) | 114.730 %             | 0.9 %             |
| 232Th (KED) | -0.131 ppb            | 0.7 %             |
| 238U (KED)  | 0.010 ppb             | 3.1 %             |

| Category   | Concentration average | Intensity average | Intensity RSD |
|------------|-----------------------|-------------------|---------------|
| 6Li (KED)  | 126.198 %             | 1,729 cps         | 2.5 %         |
| 9Be (KED)  | 0.004 ppb             | 2 cps             | 173.2 %       |
| 11B (KED)  | 1.125 ppb             | 882 cps           | 4.0 %         |
| 24Mg (KED) | 180.854 ppb           | 138,075 cps       | 0.7 %         |
| 27Al (KED) | 134.525 ppb           | 27,481 cps        | 2.1 %         |

| Category    | Concentration average | Intensity average | Intensity RSD |
|-------------|-----------------------|-------------------|---------------|
| 45Sc (KED)  | 123.077 %             | 32,295 cps        | 1.3 %         |
| 51V (KED)   | 0.269 ppb             | 3,142 cps         | 3.2 %         |
| 52Cr (KED)  | 0.724 ppb             | 13,003 cps        | 0.4 %         |
| 55Mn (KED)  | 4.987 ppb             | 46,533 cps        | 1.6 %         |
| 56Fe (KED)  | 161.646 ppb           | 2,650,488 cps     | 1.1 %         |
| 58Ni (KED)  | 0.675 ppb             | 16,342 cps        | 2.7 %         |
| 59Co (KED)  | 0.069 ppb             | 2,512 cps         | 1.1 %         |
| 63Cu (KED)  | 10.055 ppb            | 253,681 cps       | 0.7 %         |
| 64Zn (KED)  | 50.897 ppb            | 425,286 cps       | 0.1 %         |
| 69Ga (KED)  | 0.677 ppb             | 6,229 cps         | 1.6 %         |
| 75As (KED)  | 0.093 ppb             | 227 cps           | 2.9 %         |
| 80Se (KED)  | -0.270 ppb            | 2,048 cps         | 3.5 %         |
| 85Rb (KED)  | 1.615 ppb             | 13,569 cps        | 2.2 %         |
| 88Sr (KED)  | 2.595 ppb             | 31,160 cps        | 0.4 %         |
| 89Y (KED)   | 119.960 %             | 284,738 cps       | 0.9 %         |
| 107Ag (KED) | 0.522 ppb             | 34,529 cps        | 2.2 %         |
| 114Cd (KED) | -0.008 ppb            | 677 cps           | 5.5 %         |
| 115In (KED) | 116.669 %             | 506,620 cps       | 1.3 %         |
| 133Cs (KED) | 0.019 ppb             | 978 cps           | 6.0 %         |
| 138Ba (KED) | 2.347 ppb             | 128,342 cps       | 1.2 %         |
| 139La (KED) | 0.180 ppb             | 20,798 cps        | 0.4 %         |
| 140Ce (KED) | 0.761 ppb             | 111,878 cps       | 1.0 %         |
| 141Pr (KED) | 0.036 ppb             | 6,055 cps         | 2.7 %         |
| 142Nd (KED) | 0.338 ppb             | 21,180 cps        | 0.4 %         |
| 152Sm (KED) | 0.025 ppb             | 1,499 cps         | 1.5 %         |
| 153Eu (KED) | 0.003 ppb             | 591 cps           | 1.6 %         |
| 158Gd (KED) | 0.022 ppb             | 1,702 cps         | 3.9 %         |
| 159Tb (KED) | 121.180 %             | 2,464,537 cps     | 2.4 %         |
| 164Dy (KED) | 0.016 ppb             | 1,420 cps         | 5.1 %         |
| 166Er (KED) | 0.021 ppb             | 2,400 cps         | 7.1 %         |
| 169Tm (KED) | 0.000 ppb             | 353 cps           | 8.2 %         |
| 174Yb (KED) | 0.005 ppb             | 750 cps           | 3.1 %         |
| 175Lu (KED) | -0.018 ppb            | 10,311 cps        | 2.6 %         |
| 205Tl (KED) | 0.002 ppb             | 651 cps           | 6.4 %         |
| 208Pb (KED) | 0.084 ppb             | 51,442 cps        | 1.9 %         |
| 209Bi (KED) | 114.730 %             | 2,080,152 cps     | 0.9 %         |
| 232Th (KED) | -0.131 ppb            | 13,966 cps        | 2.0 %         |
| 238U (KED)  | 0.010 ppb             | 3,936 cps         | 3.3 %         |

## Sample Summary

Instrument ID: iCAP Q

Analysis index: 19

Analysis name: 2266jian

Analysis started at: 10/12/2021 4:04:33 PM

User name: WINDOWS-UPCI4ER\Administrator

| Category    | Concentration average | Concentration RSD |
|-------------|-----------------------|-------------------|
| 6Li (KED)   | 139.338 %             | 5.8 %             |
| 9Be (KED)   | 0.011 ppb             | 134.9 %           |
| 11B (KED)   | -1.933 ppb            | 23.1 %            |
| 24Mg (KED)  | 181.765 ppb           | 6.6 %             |
| 27Al (KED)  | 138.231 ppb           | 1.2 %             |
| 45Sc (KED)  | 132.791 %             | 0.3 %             |
| 51V (KED)   | 0.261 ppb             | 2.4 %             |
| 52Cr (KED)  | 0.773 ppb             | 1.0 %             |
| 55Mn (KED)  | 5.123 ppb             | 1.3 %             |
| 56Fe (KED)  | 161.168 ppb           | 1.7 %             |
| 58Ni (KED)  | 0.727 ppb             | 1.9 %             |
| 59Co (KED)  | 0.064 ppb             | 4.0 %             |
| 63Cu (KED)  | 4.682 ppb             | 0.7 %             |
| 64Zn (KED)  | 47.465 ppb            | 0.7 %             |
| 69Ga (KED)  | 0.658 ppb             | 3.4 %             |
| 75As (KED)  | 0.082 ppb             | 15.6 %            |
| 80Se (KED)  | -0.459 ppb            | 28.5 %            |
| 85Rb (KED)  | 1.114 ppb             | 1.0 %             |
| 88Sr (KED)  | 2.718 ppb             | 2.0 %             |
| 89Y (KED)   | 130.698 %             | 1.0 %             |
| 107Ag (KED) | 0.243 ppb             | 2.1 %             |
| 114Cd (KED) | -0.008 ppb            | 10.5 %            |
| 115In (KED) | 126.523 %             | 1.0 %             |
| 133Cs (KED) | 0.022 ppb             | 5.8 %             |
| 138Ba (KED) | 2.246 ppb             | 3.0 %             |
| 139La (KED) | 0.127 ppb             | 2.6 %             |
| 140Ce (KED) | 0.503 ppb             | 1.4 %             |
| 141Pr (KED) | 0.029 ppb             | 5.1 %             |
| 142Nd (KED) | 0.243 ppb             | 2.9 %             |
| 152Sm (KED) | 0.022 ppb             | 2.9 %             |
| 153Eu (KED) | 0.003 ppb             | 20.7 %            |
| 158Gd (KED) | 0.019 ppb             | 5.7 %             |
| 159Tb (KED) | 133.016 %             | 2.7 %             |
| 164Dy (KED) | 0.013 ppb             | 7.0 %             |
| 166Er (KED) | 0.015 ppb             | 12.5 %            |
| 169Tm (KED) | 0.000 ppb             | 8.0 %             |
| 174Yb (KED) | 0.005 ppb             | 16.9 %            |
| 175Lu (KED) | -0.018 ppb            | 6.9 %             |
| 205Tl (KED) | 0.002 ppb             | 9.8 %             |
| 208Pb (KED) | 0.133 ppb             | 4.6 %             |
| 209Bi (KED) | 123.737 %             | 2.1 %             |
| 232Th (KED) | -0.138 ppb            | 0.5 %             |
| 238U (KED)  | 0.009 ppb             | 4.1 %             |

| Category   | Concentration average | Intensity average | Intensity RSD |
|------------|-----------------------|-------------------|---------------|
| 6Li (KED)  | 139.338 %             | 1,909 cps         | 5.8 %         |
| 9Be (KED)  | 0.011 ppb             | 4 cps             | 86.6 %        |
| 11B (KED)  | -1.933 ppb            | 590 cps           | 3.7 %         |
| 24Mg (KED) | 181.765 ppb           | 152,882 cps       | 1.4 %         |
| 27Al (KED) | 138.231 ppb           | 30,460 cps        | 0.9 %         |

| Category    | Concentration average | Intensity average | Intensity RSD |
|-------------|-----------------------|-------------------|---------------|
| 45Sc (KED)  | 132.791 %             | 34,844 cps        | 0.3 %         |
| 51V (KED)   | 0.261 ppb             | 3,285 cps         | 2.0 %         |
| 52Cr (KED)  | 0.773 ppb             | 14,971 cps        | 1.1 %         |
| 55Mn (KED)  | 5.123 ppb             | 51,569 cps        | 1.6 %         |
| 56Fe (KED)  | 161.168 ppb           | 2,851,619 cps     | 2.0 %         |
| 58Ni (KED)  | 0.727 ppb             | 18,818 cps        | 1.8 %         |
| 59Co (KED)  | 0.064 ppb             | 2,536 cps         | 3.8 %         |
| 63Cu (KED)  | 4.682 ppb             | 129,395 cps       | 0.9 %         |
| 64Zn (KED)  | 47.465 ppb            | 432,335 cps       | 0.6 %         |
| 69Ga (KED)  | 0.658 ppb             | 6,601 cps         | 2.4 %         |
| 75As (KED)  | 0.082 ppb             | 221 cps           | 15.7 %        |
| 80Se (KED)  | -0.459 ppb            | 2,066 cps         | 6.0 %         |
| 85Rb (KED)  | 1.114 ppb             | 10,204 cps        | 1.2 %         |
| 88Sr (KED)  | 2.718 ppb             | 35,544 cps        | 2.0 %         |
| 89Y (KED)   | 130.698 %             | 310,224 cps       | 1.0 %         |
| 107Ag (KED) | 0.243 ppb             | 17,947 cps        | 2.2 %         |
| 114Cd (KED) | -0.008 ppb            | 757 cps           | 4.0 %         |
| 115In (KED) | 126.523 %             | 549,411 cps       | 1.0 %         |
| 133Cs (KED) | 0.022 ppb             | 1,153 cps         | 5.2 %         |
| 138Ba (KED) | 2.246 ppb             | 134,907 cps       | 2.9 %         |
| 139La (KED) | 0.127 ppb             | 16,265 cps        | 1.8 %         |
| 140Ce (KED) | 0.503 ppb             | 81,457 cps        | 1.4 %         |
| 141Pr (KED) | 0.029 ppb             | 5,479 cps         | 3.7 %         |
| 142Nd (KED) | 0.243 ppb             | 16,790 cps        | 0.8 %         |
| 152Sm (KED) | 0.022 ppb             | 1,439 cps         | 0.7 %         |
| 153Eu (KED) | 0.003 ppb             | 594 cps           | 10.2 %        |
| 158Gd (KED) | 0.019 ppb             | 1,626 cps         | 2.9 %         |
| 159Tb (KED) | 133.016 %             | 2,705,257 cps     | 2.7 %         |
| 164Dy (KED) | 0.013 ppb             | 1,325 cps         | 6.5 %         |
| 166Er (KED) | 0.015 ppb             | 1,938 cps         | 11.1 %        |
| 169Tm (KED) | 0.000 ppb             | 321 cps           | 5.3 %         |
| 174Yb (KED) | 0.005 ppb             | 769 cps           | 13.5 %        |
| 175Lu (KED) | -0.018 ppb            | 11,252 cps        | 2.9 %         |
| 205Tl (KED) | 0.002 ppb             | 787 cps           | 7.4 %         |
| 208Pb (KED) | 0.133 ppb             | 63,459 cps        | 0.9 %         |
| 209Bi (KED) | 123.737 %             | 2,243,471 cps     | 2.1 %         |
| 232Th (KED) | -0.138 ppb            | 12,799 cps        | 0.9 %         |
| 238U (KED)  | 0.009 ppb             | 3,805 cps         | 5.1 %         |

## Sample Summary

Instrument ID: iCAP Q

Analysis index: 20

Analysis name: 3865jian

Analysis started at: 10/12/2021 4:08:34 PM

User name: WINDOWS-UPCI4ER\Administrator

| Category    | Concentration average | Concentration RSD |
|-------------|-----------------------|-------------------|
| 6Li (KED)   | 137.472 %             | 10.4 %            |
| 9Be (KED)   | 0.011 ppb             | 135.5 %           |
| 11B (KED)   | -0.240 ppb            | 272.1 %           |
| 24Mg (KED)  | 222.985 ppb           | 10.9 %            |
| 27Al (KED)  | 211.048 ppb           | 1.1 %             |
| 45Sc (KED)  | 132.783 %             | 0.5 %             |
| 51V (KED)   | 0.393 ppb             | 4.8 %             |
| 52Cr (KED)  | 0.989 ppb             | 2.5 %             |
| 55Mn (KED)  | 7.092 ppb             | 0.8 %             |
| 56Fe (KED)  | 261.624 ppb           | 2.3 %             |
| 58Ni (KED)  | 1.088 ppb             | 1.9 %             |
| 59Co (KED)  | 0.101 ppb             | 2.8 %             |
| 63Cu (KED)  | 4.723 ppb             | 3.0 %             |
| 64Zn (KED)  | 45.179 ppb            | 2.9 %             |
| 69Ga (KED)  | 0.893 ppb             | 2.4 %             |
| 75As (KED)  | 0.114 ppb             | 12.4 %            |
| 80Se (KED)  | -0.467 ppb            | 19.2 %            |
| 85Rb (KED)  | 1.069 ppb             | 4.3 %             |
| 88Sr (KED)  | 3.529 ppb             | 1.0 %             |
| 89Y (KED)   | 131.441 %             | 2.3 %             |
| 107Ag (KED) | 0.287 ppb             | 3.2 %             |
| 114Cd (KED) | 0.033 ppb             | 2.8 %             |
| 115In (KED) | 126.600 %             | 0.8 %             |
| 133Cs (KED) | 0.033 ppb             | 4.1 %             |
| 138Ba (KED) | 3.148 ppb             | 2.1 %             |
| 139La (KED) | 0.209 ppb             | 1.3 %             |
| 140Ce (KED) | 0.760 ppb             | 0.5 %             |
| 141Pr (KED) | 0.050 ppb             | 3.6 %             |
| 142Nd (KED) | 0.380 ppb             | 4.1 %             |
| 152Sm (KED) | 0.037 ppb             | 5.4 %             |
| 153Eu (KED) | 0.005 ppb             | 3.8 %             |
| 158Gd (KED) | 0.035 ppb             | 4.9 %             |
| 159Tb (KED) | 132.147 %             | 1.3 %             |
| 164Dy (KED) | 0.023 ppb             | 2.0 %             |
| 166Er (KED) | 0.021 ppb             | 5.6 %             |
| 169Tm (KED) | 0.000 ppb             | 30.0 %            |
| 174Yb (KED) | 0.009 ppb             | 6.0 %             |
| 175Lu (KED) | -0.019 ppb            | 1.5 %             |
| 205Tl (KED) | 0.003 ppb             | 4.8 %             |
| 208Pb (KED) | 0.496 ppb             | 1.2 %             |
| 209Bi (KED) | 125.065 %             | 0.5 %             |
| 232Th (KED) | -0.115 ppb            | 1.1 %             |
| 238U (KED)  | 0.014 ppb             | 2.3 %             |

| Category   | Concentration average | Intensity average | Intensity RSD |
|------------|-----------------------|-------------------|---------------|
| 6Li (KED)  | 137.472 %             | 1,883 cps         | 10.4 %        |
| 9Be (KED)  | 0.011 ppb             | 4 cps             | 86.6 %        |
| 11B (KED)  | -0.240 ppb            | 796 cps           | 18.3 %        |
| 24Mg (KED) | 222.985 ppb           | 184,055 cps       | 0.7 %         |
| 27Al (KED) | 211.048 ppb           | 46,399 cps        | 1.1 %         |

| Category    | Concentration average | Intensity average | Intensity RSD |
|-------------|-----------------------|-------------------|---------------|
| 45Sc (KED)  | 132.783 %             | 34,842 cps        | 0.5 %         |
| 51V (KED)   | 0.393 ppb             | 4,929 cps         | 4.4 %         |
| 52Cr (KED)  | 0.989 ppb             | 19,099 cps        | 2.2 %         |
| 55Mn (KED)  | 7.092 ppb             | 71,334 cps        | 0.6 %         |
| 56Fe (KED)  | 261.624 ppb           | 4,625,594 cps     | 2.0 %         |
| 58Ni (KED)  | 1.088 ppb             | 27,044 cps        | 1.4 %         |
| 59Co (KED)  | 0.101 ppb             | 3,867 cps         | 2.3 %         |
| 63Cu (KED)  | 4.723 ppb             | 131,202 cps       | 1.7 %         |
| 64Zn (KED)  | 45.179 ppb            | 413,848 cps       | 0.5 %         |
| 69Ga (KED)  | 0.893 ppb             | 8,951 cps         | 2.2 %         |
| 75As (KED)  | 0.114 ppb             | 303 cps           | 11.9 %        |
| 80Se (KED)  | -0.467 ppb            | 2,069 cps         | 3.3 %         |
| 85Rb (KED)  | 1.069 ppb             | 9,844 cps         | 2.4 %         |
| 88Sr (KED)  | 3.529 ppb             | 46,333 cps        | 2.9 %         |
| 89Y (KED)   | 131.441 %             | 311,989 cps       | 2.3 %         |
| 107Ag (KED) | 0.287 ppb             | 21,030 cps        | 2.3 %         |
| 114Cd (KED) | 0.033 ppb             | 1,951 cps         | 1.7 %         |
| 115In (KED) | 126.600 %             | 549,747 cps       | 0.8 %         |
| 133Cs (KED) | 0.033 ppb             | 1,642 cps         | 4.3 %         |
| 138Ba (KED) | 3.148 ppb             | 186,883 cps       | 0.9 %         |
| 139La (KED) | 0.209 ppb             | 26,314 cps        | 1.3 %         |
| 140Ce (KED) | 0.760 ppb             | 121,890 cps       | 1.7 %         |
| 141Pr (KED) | 0.050 ppb             | 8,868 cps         | 2.6 %         |
| 142Nd (KED) | 0.380 ppb             | 25,896 cps        | 2.9 %         |
| 152Sm (KED) | 0.037 ppb             | 2,351 cps         | 4.8 %         |
| 153Eu (KED) | 0.005 ppb             | 904 cps           | 3.1 %         |
| 158Gd (KED) | 0.035 ppb             | 2,855 cps         | 4.2 %         |
| 159Tb (KED) | 132.147 %             | 2,687,578 cps     | 1.3 %         |
| 164Dy (KED) | 0.023 ppb             | 2,176 cps         | 0.5 %         |
| 166Er (KED) | 0.021 ppb             | 2,545 cps         | 3.5 %         |
| 169Tm (KED) | 0.000 ppb             | 560 cps           | 3.7 %         |
| 174Yb (KED) | 0.009 ppb             | 1,219 cps         | 3.9 %         |
| 175Lu (KED) | -0.019 ppb            | 11,147 cps        | 1.7 %         |
| 205Tl (KED) | 0.003 ppb             | 992 cps           | 3.6 %         |
| 208Pb (KED) | 0.496 ppb             | 123,764 cps       | 1.0 %         |
| 209Bi (KED) | 125.065 %             | 2,267,542 cps     | 0.5 %         |
| 232Th (KED) | -0.115 ppb            | 20,514 cps        | 2.4 %         |
| 238U (KED)  | 0.014 ppb             | 5,583 cps         | 1.9 %         |

## Sample Summary

Instrument ID: iCAP Q

Analysis index: 21

Analysis name: 3873jian

Analysis started at: 10/12/2021 4:12:28 PM

User name: WINDOWS-UPCI4ER\Administrator

| Category    | Concentration average | Concentration RSD |
|-------------|-----------------------|-------------------|
| 6Li (KED)   | 142.664 %             | 2.6 %             |
| 9Be (KED)   | -0.006 ppb            | 0.0 %             |
| 11B (KED)   | -1.733 ppb            | 13.6 %            |
| 24Mg (KED)  | 93.130 ppb            | 2.5 %             |
| 27Al (KED)  | 78.255 ppb            | 0.9 %             |
| 45Sc (KED)  | 128.953 %             | 1.9 %             |
| 51V (KED)   | 0.149 ppb             | 10.4 %            |
| 52Cr (KED)  | 0.875 ppb             | 2.6 %             |
| 55Mn (KED)  | 2.939 ppb             | 2.5 %             |
| 56Fe (KED)  | 108.925 ppb           | 2.8 %             |
| 58Ni (KED)  | 0.483 ppb             | 1.4 %             |
| 59Co (KED)  | 0.035 ppb             | 5.6 %             |
| 63Cu (KED)  | 8.626 ppb             | 0.5 %             |
| 64Zn (KED)  | 51.784 ppb            | 1.1 %             |
| 69Ga (KED)  | 0.450 ppb             | 1.8 %             |
| 75As (KED)  | 0.066 ppb             | 20.0 %            |
| 80Se (KED)  | -0.450 ppb            | 9.7 %             |
| 85Rb (KED)  | 0.714 ppb             | 4.5 %             |
| 88Sr (KED)  | 1.576 ppb             | 1.6 %             |
| 89Y (KED)   | 130.445 %             | 0.3 %             |
| 107Ag (KED) | 0.443 ppb             | 0.8 %             |
| 114Cd (KED) | 0.029 ppb             | 6.2 %             |
| 115In (KED) | 127.684 %             | 1.6 %             |
| 133Cs (KED) | 0.009 ppb             | 6.3 %             |
| 138Ba (KED) | 1.618 ppb             | 1.0 %             |
| 139La (KED) | 0.074 ppb             | 2.8 %             |
| 140Ce (KED) | 0.408 ppb             | 1.3 %             |
| 141Pr (KED) | 0.015 ppb             | 5.4 %             |
| 142Nd (KED) | 0.175 ppb             | 0.2 %             |
| 152Sm (KED) | 0.012 ppb             | 2.6 %             |
| 153Eu (KED) | 0.001 ppb             | 60.3 %            |
| 158Gd (KED) | 0.011 ppb             | 9.8 %             |
| 159Tb (KED) | 131.847 %             | 1.6 %             |
| 164Dy (KED) | 0.007 ppb             | 9.0 %             |
| 166Er (KED) | 0.013 ppb             | 4.4 %             |
| 169Tm (KED) | -0.001 ppb            | 10.2 %            |
| 174Yb (KED) | 0.002 ppb             | 12.4 %            |
| 175Lu (KED) | -0.020 ppb            | 10.6 %            |
| 205Tl (KED) | 0.001 ppb             | 20.0 %            |
| 208Pb (KED) | 0.626 ppb             | 0.5 %             |
| 209Bi (KED) | 124.090 %             | 0.6 %             |
| 232Th (KED) | -0.156 ppb            | 0.4 %             |
| 238U (KED)  | 0.007 ppb             | 2.0 %             |

| Category   | Concentration average | Intensity average | Intensity RSD |
|------------|-----------------------|-------------------|---------------|
| 6Li (KED)  | 142.664 %             | 1,955 cps         | 2.6 %         |
| 9Be (KED)  | -0.006 ppb            | 0 cps             |               |
| 11B (KED)  | -1.733 ppb            | 632 cps           | 7.1 %         |
| 24Mg (KED) | 93.130 ppb            | 80,526 cps        | 0.1 %         |
| 27Al (KED) | 78.255 ppb            | 16,828 cps        | 1.1 %         |

| Category    | Concentration average | Intensity average | Intensity RSD |
|-------------|-----------------------|-------------------|---------------|
| 45Sc (KED)  | 128.953 %             | 33,837 cps        | 1.9 %         |
| 51V (KED)   | 0.149 ppb             | 1,840 cps         | 8.8 %         |
| 52Cr (KED)  | 0.875 ppb             | 16,433 cps        | 2.9 %         |
| 55Mn (KED)  | 2.939 ppb             | 28,778 cps        | 1.1 %         |
| 56Fe (KED)  | 108.925 ppb           | 1,872,193 cps     | 0.9 %         |
| 58Ni (KED)  | 0.483 ppb             | 12,866 cps        | 1.7 %         |
| 59Co (KED)  | 0.035 ppb             | 1,408 cps         | 3.0 %         |
| 63Cu (KED)  | 8.626 ppb             | 236,856 cps       | 0.8 %         |
| 64Zn (KED)  | 51.784 ppb            | 470,476 cps       | 0.9 %         |
| 69Ga (KED)  | 0.450 ppb             | 4,556 cps         | 2.0 %         |
| 75As (KED)  | 0.066 ppb             | 179 cps           | 18.8 %        |
| 80Se (KED)  | -0.450 ppb            | 2,069 cps         | 1.9 %         |
| 85Rb (KED)  | 0.714 ppb             | 6,541 cps         | 4.1 %         |
| 88Sr (KED)  | 1.576 ppb             | 20,697 cps        | 1.3 %         |
| 89Y (KED)   | 130.445 %             | 309,625 cps       | 0.3 %         |
| 107Ag (KED) | 0.443 ppb             | 32,225 cps        | 0.9 %         |
| 114Cd (KED) | 0.029 ppb             | 1,855 cps         | 4.0 %         |
| 115In (KED) | 127.684 %             | 554,455 cps       | 1.6 %         |
| 133Cs (KED) | 0.009 ppb             | 609 cps           | 4.7 %         |
| 138Ba (KED) | 1.618 ppb             | 96,992 cps        | 0.8 %         |
| 139La (KED) | 0.074 ppb             | 9,530 cps         | 3.2 %         |
| 140Ce (KED) | 0.408 ppb             | 65,500 cps        | 0.9 %         |
| 141Pr (KED) | 0.015 ppb             | 3,013 cps         | 3.0 %         |
| 142Nd (KED) | 0.175 ppb             | 12,002 cps        | 1.4 %         |
| 152Sm (KED) | 0.012 ppb             | 838 cps           | 3.6 %         |
| 153Eu (KED) | 0.001 ppb             | 326 cps           | 12.8 %        |
| 158Gd (KED) | 0.011 ppb             | 1,004 cps         | 9.2 %         |
| 159Tb (KED) | 131.847 %             | 2,681,488 cps     | 1.6 %         |
| 164Dy (KED) | 0.007 ppb             | 813 cps           | 8.4 %         |
| 166Er (KED) | 0.013 ppb             | 1,713 cps         | 4.8 %         |
| 169Tm (KED) | -0.001 ppb            | 212 cps           | 11.0 %        |
| 174Yb (KED) | 0.002 ppb             | 446 cps           | 9.0 %         |
| 175Lu (KED) | -0.020 ppb            | 10,808 cps        | 2.8 %         |
| 205Tl (KED) | 0.001 ppb             | 561 cps           | 7.4 %         |
| 208Pb (KED) | 0.626 ppb             | 143,943 cps       | 0.4 %         |
| 209Bi (KED) | 124.090 %             | 2,249,855 cps     | 0.6 %         |
| 232Th (KED) | -0.156 ppb            | 6,814 cps         | 3.9 %         |
| 238U (KED)  | 0.007 ppb             | 2,850 cps         | 2.1 %         |

## Sample Summary

Instrument ID: iCAP Q

Analysis index: 22

Analysis name: 2104jian

Analysis started at: 10/12/2021 4:16:31 PM

User name: WINDOWS-UPCI4ER\Administrator

| Category    | Concentration average | Concentration RSD |
|-------------|-----------------------|-------------------|
| 6Li (KED)   | 143.069 %             | 1.5 %             |
| 9Be (KED)   | -0.006 ppb            | 0.0 %             |
| 11B (KED)   | 23.737 ppb            | 4.1 %             |
| 24Mg (KED)  | 236.906 ppb           | 0.2 %             |
| 27Al (KED)  | 144.613 ppb           | 2.3 %             |
| 45Sc (KED)  | 137.836 %             | 1.2 %             |
| 51V (KED)   | 0.281 ppb             | 4.0 %             |
| 52Cr (KED)  | 0.728 ppb             | 2.5 %             |
| 55Mn (KED)  | 5.755 ppb             | 2.1 %             |
| 56Fe (KED)  | 172.364 ppb           | 0.9 %             |
| 58Ni (KED)  | 0.687 ppb             | 2.9 %             |
| 59Co (KED)  | 0.069 ppb             | 7.3 %             |
| 63Cu (KED)  | 37.370 ppb            | 2.3 %             |
| 64Zn (KED)  | 52.401 ppb            | 1.6 %             |
| 69Ga (KED)  | 0.798 ppb             | 3.1 %             |
| 75As (KED)  | 0.114 ppb             | 14.1 %            |
| 80Se (KED)  | -0.680 ppb            | 2.3 %             |
| 85Rb (KED)  | 1.733 ppb             | 3.9 %             |
| 88Sr (KED)  | 3.185 ppb             | 2.4 %             |
| 89Y (KED)   | 135.222 %             | 0.7 %             |
| 107Ag (KED) | 0.626 ppb             | 2.1 %             |
| 114Cd (KED) | -0.005 ppb            | 13.8 %            |
| 115In (KED) | 129.226 %             | 1.6 %             |
| 133Cs (KED) | 0.024 ppb             | 5.6 %             |
| 138Ba (KED) | 2.804 ppb             | 1.8 %             |
| 139La (KED) | 0.155 ppb             | 2.3 %             |
| 140Ce (KED) | 1.082 ppb             | 3.1 %             |
| 141Pr (KED) | 0.035 ppb             | 1.6 %             |
| 142Nd (KED) | 0.439 ppb             | 2.3 %             |
| 152Sm (KED) | 0.025 ppb             | 5.5 %             |
| 153Eu (KED) | 0.003 ppb             | 8.0 %             |
| 158Gd (KED) | 0.022 ppb             | 5.3 %             |
| 159Tb (KED) | 135.312 %             | 1.7 %             |
| 164Dy (KED) | 0.016 ppb             | 3.2 %             |
| 166Er (KED) | 0.039 ppb             | 4.7 %             |
| 169Tm (KED) | 0.000 ppb             | 48.5 %            |
| 174Yb (KED) | 0.006 ppb             | 8.1 %             |
| 175Lu (KED) | -0.019 ppb            | 4.0 %             |
| 205Tl (KED) | 0.002 ppb             | 8.4 %             |
| 208Pb (KED) | 0.039 ppb             | 14.9 %            |
| 209Bi (KED) | 127.255 %             | 0.8 %             |
| 232Th (KED) | -0.132 ppb            | 0.6 %             |
| 238U (KED)  | 0.012 ppb             | 3.2 %             |

| Category   | Concentration average | Intensity average | Intensity RSD |
|------------|-----------------------|-------------------|---------------|
| 6Li (KED)  | 143.069 %             | 1,960 cps         | 1.5 %         |
| 9Be (KED)  | -0.006 ppb            | 0 cps             |               |
| 11B (KED)  | 23.737 ppb            | 3,903 cps         | 4.6 %         |
| 24Mg (KED) | 236.906 ppb           | 205,018 cps       | 1.7 %         |
| 27Al (KED) | 144.613 ppb           | 33,063 cps        | 1.1 %         |

| Category    | Concentration average | Intensity average | Intensity RSD |
|-------------|-----------------------|-------------------|---------------|
| 45Sc (KED)  | 137.836 %             | 36,168 cps        | 1.2 %         |
| 51V (KED)   | 0.281 ppb             | 3,669 cps         | 3.7 %         |
| 52Cr (KED)  | 0.728 ppb             | 14,635 cps        | 2.6 %         |
| 55Mn (KED)  | 5.755 ppb             | 60,106 cps        | 1.2 %         |
| 56Fe (KED)  | 172.364 ppb           | 3,164,967 cps     | 0.8 %         |
| 58Ni (KED)  | 0.687 ppb             | 18,578 cps        | 2.9 %         |
| 59Co (KED)  | 0.069 ppb             | 2,796 cps         | 6.1 %         |
| 63Cu (KED)  | 37.370 ppb            | 1,059,221 cps     | 1.6 %         |
| 64Zn (KED)  | 52.401 ppb            | 493,445 cps       | 0.9 %         |
| 69Ga (KED)  | 0.798 ppb             | 8,251 cps         | 2.5 %         |
| 75As (KED)  | 0.114 ppb             | 312 cps           | 14.2 %        |
| 80Se (KED)  | -0.680 ppb            | 1,936 cps         | 1.3 %         |
| 85Rb (KED)  | 1.733 ppb             | 16,401 cps        | 3.3 %         |
| 88Sr (KED)  | 3.185 ppb             | 43,041 cps        | 2.0 %         |
| 89Y (KED)   | 135.222 %             | 320,964 cps       | 0.7 %         |
| 107Ag (KED) | 0.626 ppb             | 45,696 cps        | 0.6 %         |
| 114Cd (KED) | -0.005 ppb            | 853 cps           | 3.1 %         |
| 115In (KED) | 129.226 %             | 561,148 cps       | 1.6 %         |
| 133Cs (KED) | 0.024 ppb             | 1,265 cps         | 3.4 %         |
| 138Ba (KED) | 2.804 ppb             | 170,747 cps       | 2.0 %         |
| 139La (KED) | 0.155 ppb             | 20,034 cps        | 0.7 %         |
| 140Ce (KED) | 1.082 ppb             | 177,397 cps       | 3.8 %         |
| 141Pr (KED) | 0.035 ppb             | 6,449 cps         | 3.0 %         |
| 142Nd (KED) | 0.439 ppb             | 30,651 cps        | 1.8 %         |
| 152Sm (KED) | 0.025 ppb             | 1,678 cps         | 4.9 %         |
| 153Eu (KED) | 0.003 ppb             | 641 cps           | 3.9 %         |
| 158Gd (KED) | 0.022 ppb             | 1,913 cps         | 3.9 %         |
| 159Tb (KED) | 135.312 %             | 2,751,941 cps     | 1.7 %         |
| 164Dy (KED) | 0.016 ppb             | 1,656 cps         | 3.0 %         |
| 166Er (KED) | 0.039 ppb             | 4,573 cps         | 3.3 %         |
| 169Tm (KED) | 0.000 ppb             | 392 cps           | 10.7 %        |
| 174Yb (KED) | 0.006 ppb             | 894 cps           | 5.4 %         |
| 175Lu (KED) | -0.019 ppb            | 11,237 cps        | 2.9 %         |
| 205Tl (KED) | 0.002 ppb             | 876 cps           | 5.6 %         |
| 208Pb (KED) | 0.039 ppb             | 49,672 cps        | 1.9 %         |
| 209Bi (KED) | 127.255 %             | 2,307,240 cps     | 0.8 %         |
| 232Th (KED) | -0.132 ppb            | 15,019 cps        | 2.1 %         |
| 238U (KED)  | 0.012 ppb             | 4,820 cps         | 2.2 %         |

## Sample Summary

Instrument ID: iCAP Q

Analysis index: 23

Analysis name: 1486jian

Analysis started at: 10/12/2021 4:20:38 PM

User name: WINDOWS-UPCI4ER\Administrator

| Category    | Concentration average | Concentration RSD |
|-------------|-----------------------|-------------------|
| 6Li (KED)   | 131.146 %             | 2.4 %             |
| 9Be (KED)   | 0.008 ppb             | 4.4 %             |
| 11B (KED)   | -1.296 ppb            | 2.3 %             |
| 24Mg (KED)  | 154.031 ppb           | 2.9 %             |
| 27Al (KED)  | 95.167 ppb            | 0.7 %             |
| 45Sc (KED)  | 129.021 %             | 0.6 %             |
| 51V (KED)   | 0.170 ppb             | 3.1 %             |
| 52Cr (KED)  | 0.680 ppb             | 2.8 %             |
| 55Mn (KED)  | 3.766 ppb             | 1.2 %             |
| 56Fe (KED)  | 114.331 ppb           | 1.0 %             |
| 58Ni (KED)  | 0.490 ppb             | 4.2 %             |
| 59Co (KED)  | 0.048 ppb             | 2.1 %             |
| 63Cu (KED)  | 6.714 ppb             | 1.4 %             |
| 64Zn (KED)  | 50.489 ppb            | 2.0 %             |
| 69Ga (KED)  | 0.541 ppb             | 2.4 %             |
| 75As (KED)  | 0.082 ppb             | 8.6 %             |
| 80Se (KED)  | -0.292 ppb            | 39.2 %            |
| 85Rb (KED)  | 1.009 ppb             | 1.3 %             |
| 88Sr (KED)  | 2.131 ppb             | 2.4 %             |
| 89Y (KED)   | 124.390 %             | 1.2 %             |
| 107Ag (KED) | 0.296 ppb             | 0.7 %             |
| 114Cd (KED) | -0.010 ppb            | 9.0 %             |
| 115In (KED) | 119.090 %             | 0.9 %             |
| 133Cs (KED) | 0.012 ppb             | 7.1 %             |
| 138Ba (KED) | 1.854 ppb             | 0.4 %             |
| 139La (KED) | 0.114 ppb             | 0.9 %             |
| 140Ce (KED) | 0.738 ppb             | 7.2 %             |
| 141Pr (KED) | 0.022 ppb             | 4.4 %             |
| 142Nd (KED) | 0.295 ppb             | 2.0 %             |
| 152Sm (KED) | 0.016 ppb             | 7.2 %             |
| 153Eu (KED) | 0.001 ppb             | 30.6 %            |
| 158Gd (KED) | 0.013 ppb             | 1.1 %             |
| 159Tb (KED) | 124.803 %             | 0.7 %             |
| 164Dy (KED) | 0.010 ppb             | 2.1 %             |
| 166Er (KED) | 0.023 ppb             | 6.6 %             |
| 169Tm (KED) | -0.001 ppb            | 6.2 %             |
| 174Yb (KED) | 0.003 ppb             | 14.4 %            |
| 175Lu (KED) | -0.020 ppb            | 6.6 %             |
| 205Tl (KED) | 0.001 ppb             | 7.2 %             |
| 208Pb (KED) | 0.019 ppb             | 24.9 %            |
| 209Bi (KED) | 117.973 %             | 0.7 %             |
| 232Th (KED) | -0.150 ppb            | 0.1 %             |
| 238U (KED)  | 0.007 ppb             | 8.2 %             |

| Category   | Concentration average | Intensity average | Intensity RSD |
|------------|-----------------------|-------------------|---------------|
| 6Li (KED)  | 131.146 %             | 1,797 cps         | 2.4 %         |
| 9Be (KED)  | 0.008 ppb             | 3 cps             | 0.0 %         |
| 11B (KED)  | -1.296 ppb            | 632 cps           | 2.6 %         |
| 24Mg (KED) | 154.031 ppb           | 122,235 cps       | 0.8 %         |
| 27Al (KED) | 95.167 ppb            | 20,437 cps        | 1.3 %         |

| Category    | Concentration average | Intensity average | Intensity RSD |
|-------------|-----------------------|-------------------|---------------|
| 45Sc (KED)  | 129.021 %             | 33,855 cps        | 0.6 %         |
| 51V (KED)   | 0.170 ppb             | 2,101 cps         | 2.5 %         |
| 52Cr (KED)  | 0.680 ppb             | 12,805 cps        | 2.1 %         |
| 55Mn (KED)  | 3.766 ppb             | 36,870 cps        | 1.4 %         |
| 56Fe (KED)  | 114.331 ppb           | 1,966,554 cps     | 0.3 %         |
| 58Ni (KED)  | 0.490 ppb             | 13,037 cps        | 2.8 %         |
| 59Co (KED)  | 0.048 ppb             | 1,868 cps         | 1.9 %         |
| 63Cu (KED)  | 6.714 ppb             | 176,047 cps       | 0.9 %         |
| 64Zn (KED)  | 50.489 ppb            | 437,434 cps       | 0.9 %         |
| 69Ga (KED)  | 0.541 ppb             | 5,188 cps         | 1.7 %         |
| 75As (KED)  | 0.082 ppb             | 210 cps           | 8.4 %         |
| 80Se (KED)  | -0.292 ppb            | 2,105 cps         | 3.4 %         |
| 85Rb (KED)  | 1.009 ppb             | 8,803 cps         | 0.6 %         |
| 88Sr (KED)  | 2.131 ppb             | 26,582 cps        | 1.4 %         |
| 89Y (KED)   | 124.390 %             | 295,253 cps       | 1.2 %         |
| 107Ag (KED) | 0.296 ppb             | 20,358 cps        | 0.8 %         |
| 114Cd (KED) | -0.010 ppb            | 638 cps           | 3.4 %         |
| 115In (KED) | 119.090 %             | 517,133 cps       | 0.9 %         |
| 133Cs (KED) | 0.012 ppb             | 716 cps           | 4.5 %         |
| 138Ba (KED) | 1.854 ppb             | 104,934 cps       | 1.1 %         |
| 139La (KED) | 0.114 ppb             | 13,766 cps        | 0.2 %         |
| 140Ce (KED) | 0.738 ppb             | 111,772 cps       | 7.9 %         |
| 141Pr (KED) | 0.022 ppb             | 3,988 cps         | 3.2 %         |
| 142Nd (KED) | 0.295 ppb             | 19,087 cps        | 1.8 %         |
| 152Sm (KED) | 0.016 ppb             | 1,017 cps         | 6.7 %         |
| 153Eu (KED) | 0.001 ppb             | 414 cps           | 11.8 %        |
| 158Gd (KED) | 0.013 ppb             | 1,121 cps         | 0.5 %         |
| 159Tb (KED) | 124.803 %             | 2,538,219 cps     | 0.7 %         |
| 164Dy (KED) | 0.010 ppb             | 997 cps           | 2.3 %         |
| 166Er (KED) | 0.023 ppb             | 2,599 cps         | 5.1 %         |
| 169Tm (KED) | -0.001 ppb            | 274 cps           | 4.3 %         |
| 174Yb (KED) | 0.003 ppb             | 520 cps           | 10.7 %        |
| 175Lu (KED) | -0.020 ppb            | 10,292 cps        | 2.4 %         |
| 205Tl (KED) | 0.001 ppb             | 626 cps           | 3.3 %         |
| 208Pb (KED) | 0.019 ppb             | 42,860 cps        | 1.4 %         |
| 209Bi (KED) | 117.973 %             | 2,138,964 cps     | 0.7 %         |
| 232Th (KED) | -0.150 ppb            | 8,347 cps         | 0.2 %         |
| 238U (KED)  | 0.007 ppb             | 2,866 cps         | 6.9 %         |

## Sample Summary

Instrument ID: iCAP Q

Analysis index: 24

Analysis name: 1485jian

Analysis started at: 10/12/2021 4:24:25 PM

User name: WINDOWS-UPCI4ER\Administrator

| Category    | Concentration average | Concentration RSD |
|-------------|-----------------------|-------------------|
| 6Li (KED)   | 149.152 %             | 2.2 %             |
| 9Be (KED)   | 0.002 ppb             | 328.0 %           |
| 11B (KED)   | -0.493 ppb            | 33.1 %            |
| 24Mg (KED)  | 164.064 ppb           | 1.8 %             |
| 27Al (KED)  | 121.874 ppb           | 1.5 %             |
| 45Sc (KED)  | 145.311 %             | 2.9 %             |
| 51V (KED)   | 0.227 ppb             | 6.9 %             |
| 52Cr (KED)  | 0.710 ppb             | 2.8 %             |
| 55Mn (KED)  | 4.717 ppb             | 0.5 %             |
| 56Fe (KED)  | 175.843 ppb           | 1.0 %             |
| 58Ni (KED)  | 0.681 ppb             | 4.4 %             |
| 59Co (KED)  | 0.057 ppb             | 4.7 %             |
| 63Cu (KED)  | 15.445 ppb            | 0.4 %             |
| 64Zn (KED)  | 57.242 ppb            | 0.4 %             |
| 69Ga (KED)  | 0.641 ppb             | 1.0 %             |
| 75As (KED)  | 0.084 ppb             | 10.4 %            |
| 80Se (KED)  | -0.587 ppb            | 22.8 %            |
| 85Rb (KED)  | 0.886 ppb             | 1.3 %             |
| 88Sr (KED)  | 2.483 ppb             | 1.9 %             |
| 89Y (KED)   | 141.135 %             | 2.2 %             |
| 107Ag (KED) | 1.118 ppb             | 0.9 %             |
| 114Cd (KED) | 0.036 ppb             | 10.7 %            |
| 115In (KED) | 136.179 %             | 3.0 %             |
| 133Cs (KED) | 0.020 ppb             | 1.0 %             |
| 138Ba (KED) | 2.195 ppb             | 2.1 %             |
| 139La (KED) | 0.135 ppb             | 1.9 %             |
| 140Ce (KED) | 0.688 ppb             | 0.5 %             |
| 141Pr (KED) | 0.029 ppb             | 5.6 %             |
| 142Nd (KED) | 0.297 ppb             | 1.6 %             |
| 152Sm (KED) | 0.020 ppb             | 7.5 %             |
| 153Eu (KED) | 0.002 ppb             | 4.6 %             |
| 158Gd (KED) | 0.018 ppb             | 3.3 %             |
| 159Tb (KED) | 143.179 %             | 2.2 %             |
| 164Dy (KED) | 0.012 ppb             | 8.6 %             |
| 166Er (KED) | 0.022 ppb             | 4.3 %             |
| 169Tm (KED) | -0.001 ppb            | 15.8 %            |
| 174Yb (KED) | 0.004 ppb             | 5.0 %             |
| 175Lu (KED) | -0.021 ppb            | 5.8 %             |
| 205Tl (KED) | 0.002 ppb             | 8.9 %             |
| 208Pb (KED) | 0.731 ppb             | 3.1 %             |
| 209Bi (KED) | 133.375 %             | 2.3 %             |
| 232Th (KED) | -0.140 ppb            | 0.4 %             |
| 238U (KED)  | 0.009 ppb             | 1.9 %             |

| Category   | Concentration average | Intensity average | Intensity RSD |
|------------|-----------------------|-------------------|---------------|
| 6Li (KED)  | 149.152 %             | 2,044 cps         | 2.2 %         |
| 9Be (KED)  | 0.002 ppb             | 2 cps             | 86.6 %        |
| 11B (KED)  | -0.493 ppb            | 827 cps           | 4.8 %         |
| 24Mg (KED) | 164.064 ppb           | 148,108 cps       | 2.4 %         |
| 27Al (KED) | 121.874 ppb           | 29,421 cps        | 4.2 %         |

| Category    | Concentration average | Intensity average | Intensity RSD |
|-------------|-----------------------|-------------------|---------------|
| 45Sc (KED)  | 145.311 %             | 38,129 cps        | 2.9 %         |
| 51V (KED)   | 0.227 ppb             | 3,130 cps         | 4.0 %         |
| 52Cr (KED)  | 0.710 ppb             | 15,057 cps        | 1.3 %         |
| 55Mn (KED)  | 4.717 ppb             | 51,961 cps        | 2.5 %         |
| 56Fe (KED)  | 175.843 ppb           | 3,404,337 cps     | 3.5 %         |
| 58Ni (KED)  | 0.681 ppb             | 19,426 cps        | 1.0 %         |
| 59Co (KED)  | 0.057 ppb             | 2,481 cps         | 3.6 %         |
| 63Cu (KED)  | 15.445 ppb            | 457,758 cps       | 2.1 %         |
| 64Zn (KED)  | 57.242 ppb            | 562,281 cps       | 1.9 %         |
| 69Ga (KED)  | 0.641 ppb             | 6,943 cps         | 3.1 %         |
| 75As (KED)  | 0.084 ppb             | 243 cps           | 11.0 %        |
| 80Se (KED)  | -0.587 ppb            | 2,107 cps         | 3.8 %         |
| 85Rb (KED)  | 0.886 ppb             | 8,773 cps         | 0.9 %         |
| 88Sr (KED)  | 2.483 ppb             | 35,109 cps        | 4.1 %         |
| 89Y (KED)   | 141.135 %             | 334,998 cps       | 2.2 %         |
| 107Ag (KED) | 1.118 ppb             | 85,241 cps        | 2.1 %         |
| 114Cd (KED) | 0.036 ppb             | 2,205 cps         | 3.1 %         |
| 115In (KED) | 136.179 %             | 591,342 cps       | 3.0 %         |
| 133Cs (KED) | 0.020 ppb             | 1,156 cps         | 2.2 %         |
| 138Ba (KED) | 2.195 ppb             | 142,000 cps       | 0.8 %         |
| 139La (KED) | 0.135 ppb             | 18,530 cps        | 2.5 %         |
| 140Ce (KED) | 0.688 ppb             | 119,588 cps       | 2.3 %         |
| 141Pr (KED) | 0.029 ppb             | 5,901 cps         | 7.3 %         |
| 142Nd (KED) | 0.297 ppb             | 22,028 cps        | 3.3 %         |
| 152Sm (KED) | 0.020 ppb             | 1,457 cps         | 8.2 %         |
| 153Eu (KED) | 0.002 ppb             | 563 cps           | 4.5 %         |
| 158Gd (KED) | 0.018 ppb             | 1,706 cps         | 1.4 %         |
| 159Tb (KED) | 143.179 %             | 2,911,951 cps     | 2.2 %         |
| 164Dy (KED) | 0.012 ppb             | 1,303 cps         | 6.7 %         |
| 166Er (KED) | 0.022 ppb             | 2,943 cps         | 5.7 %         |
| 169Tm (KED) | -0.001 ppb            | 320 cps           | 9.9 %         |
| 174Yb (KED) | 0.004 ppb             | 723 cps           | 1.7 %         |
| 175Lu (KED) | -0.021 ppb            | 11,515 cps        | 4.7 %         |
| 205Tl (KED) | 0.002 ppb             | 822 cps           | 3.0 %         |
| 208Pb (KED) | 0.731 ppb             | 173,116 cps       | 1.4 %         |
| 209Bi (KED) | 133.375 %             | 2,418,199 cps     | 2.3 %         |
| 232Th (KED) | -0.140 ppb            | 12,958 cps        | 0.8 %         |
| 238U (KED)  | 0.009 ppb             | 4,024 cps         | 3.8 %         |

## Sample Summary

Instrument ID: iCAP Q

Analysis index: 25

Analysis name: 1372jian

Analysis started at: 10/12/2021 4:28:16 PM

User name: WINDOWS-UPCI4ER\Administrator

| Category    | Concentration average | Concentration RSD |
|-------------|-----------------------|-------------------|
| 6Li (KED)   | 141.934 %             | 5.2 %             |
| 9Be (KED)   | -0.002 ppb            | 393.0 %           |
| 11B (KED)   | -0.670 ppb            | 100.0 %           |
| 24Mg (KED)  | 199.284 ppb           | 5.5 %             |
| 27Al (KED)  | 168.821 ppb           | 0.9 %             |
| 45Sc (KED)  | 134.566 %             | 0.7 %             |
| 51V (KED)   | 0.326 ppb             | 2.4 %             |
| 52Cr (KED)  | 0.570 ppb             | 1.2 %             |
| 55Mn (KED)  | 5.813 ppb             | 1.0 %             |
| 56Fe (KED)  | 188.426 ppb           | 1.8 %             |
| 58Ni (KED)  | 0.791 ppb             | 2.8 %             |
| 59Co (KED)  | 0.075 ppb             | 4.4 %             |
| 63Cu (KED)  | 8.661 ppb             | 1.0 %             |
| 64Zn (KED)  | 47.130 ppb            | 1.9 %             |
| 69Ga (KED)  | 0.759 ppb             | 1.2 %             |
| 75As (KED)  | 0.104 ppb             | 21.3 %            |
| 80Se (KED)  | -0.343 ppb            | 41.2 %            |
| 85Rb (KED)  | 1.360 ppb             | 3.8 %             |
| 88Sr (KED)  | 2.916 ppb             | 1.3 %             |
| 89Y (KED)   | 132.385 %             | 3.0 %             |
| 107Ag (KED) | 0.359 ppb             | 3.2 %             |
| 114Cd (KED) | -0.004 ppb            | 35.1 %            |
| 115In (KED) | 129.213 %             | 0.6 %             |
| 133Cs (KED) | 0.025 ppb             | 11.1 %            |
| 138Ba (KED) | 2.609 ppb             | 1.6 %             |
| 139La (KED) | 0.171 ppb             | 4.1 %             |
| 140Ce (KED) | 0.702 ppb             | 0.5 %             |
| 141Pr (KED) | 0.040 ppb             | 2.4 %             |
| 142Nd (KED) | 0.330 ppb             | 2.1 %             |
| 152Sm (KED) | 0.029 ppb             | 2.8 %             |
| 153Eu (KED) | 0.004 ppb             | 12.4 %            |
| 158Gd (KED) | 0.025 ppb             | 5.5 %             |
| 159Tb (KED) | 135.066 %             | 1.1 %             |
| 164Dy (KED) | 0.018 ppb             | 5.2 %             |
| 166Er (KED) | 0.017 ppb             | 2.1 %             |
| 169Tm (KED) | 0.000 ppb             | 151.2 %           |
| 174Yb (KED) | 0.007 ppb             | 3.0 %             |
| 175Lu (KED) | -0.020 ppb            | 4.1 %             |
| 205Tl (KED) | 0.002 ppb             | 14.6 %            |
| 208Pb (KED) | 0.053 ppb             | 7.8 %             |
| 209Bi (KED) | 126.100 %             | 2.1 %             |
| 232Th (KED) | -0.124 ppb            | 0.6 %             |
| 238U (KED)  | 0.011 ppb             | 4.7 %             |

| Category   | Concentration average | Intensity average | Intensity RSD |
|------------|-----------------------|-------------------|---------------|
| 6Li (KED)  | 141.934 %             | 1,945 cps         | 5.2 %         |
| 9Be (KED)  | -0.002 ppb            | 1 cps             | 173.2 %       |
| 11B (KED)  | -0.670 ppb            | 764 cps           | 13.6 %        |
| 24Mg (KED) | 199.284 ppb           | 170,819 cps       | 0.9 %         |
| 27Al (KED) | 168.821 ppb           | 37,656 cps        | 1.4 %         |

| Category    | Concentration average | Intensity average | Intensity RSD |
|-------------|-----------------------|-------------------|---------------|
| 45Sc (KED)  | 134.566 %             | 35,310 cps        | 0.7 %         |
| 51V (KED)   | 0.326 ppb             | 4,155 cps         | 1.6 %         |
| 52Cr (KED)  | 0.570 ppb             | 11,237 cps        | 1.8 %         |
| 55Mn (KED)  | 5.813 ppb             | 59,282 cps        | 0.6 %         |
| 56Fe (KED)  | 188.426 ppb           | 3,377,369 cps     | 1.2 %         |
| 58Ni (KED)  | 0.791 ppb             | 20,536 cps        | 1.8 %         |
| 59Co (KED)  | 0.075 ppb             | 2,947 cps         | 3.5 %         |
| 63Cu (KED)  | 8.661 ppb             | 241,305 cps       | 2.1 %         |
| 64Zn (KED)  | 47.130 ppb            | 434,702 cps       | 1.1 %         |
| 69Ga (KED)  | 0.759 ppb             | 7,686 cps         | 2.2 %         |
| 75As (KED)  | 0.104 ppb             | 277 cps           | 17.4 %        |
| 80Se (KED)  | -0.343 ppb            | 2,194 cps         | 4.7 %         |
| 85Rb (KED)  | 1.360 ppb             | 12,603 cps        | 1.8 %         |
| 88Sr (KED)  | 2.916 ppb             | 38,605 cps        | 3.6 %         |
| 89Y (KED)   | 132.385 %             | 314,228 cps       | 3.0 %         |
| 107Ag (KED) | 0.359 ppb             | 26,587 cps        | 3.5 %         |
| 114Cd (KED) | -0.004 ppb            | 893 cps           | 4.8 %         |
| 115In (KED) | 129.213 %             | 561,091 cps       | 0.6 %         |
| 133Cs (KED) | 0.025 ppb             | 1,319 cps         | 9.0 %         |
| 138Ba (KED) | 2.609 ppb             | 158,793 cps       | 2.7 %         |
| 139La (KED) | 0.171 ppb             | 22,057 cps        | 4.5 %         |
| 140Ce (KED) | 0.702 ppb             | 115,050 cps       | 1.3 %         |
| 141Pr (KED) | 0.040 ppb             | 7,407 cps         | 1.4 %         |
| 142Nd (KED) | 0.330 ppb             | 23,065 cps        | 1.0 %         |
| 152Sm (KED) | 0.029 ppb             | 1,889 cps         | 3.0 %         |
| 153Eu (KED) | 0.004 ppb             | 799 cps           | 7.3 %         |
| 158Gd (KED) | 0.025 ppb             | 2,186 cps         | 5.6 %         |
| 159Tb (KED) | 135.066 %             | 2,746,955 cps     | 1.1 %         |
| 164Dy (KED) | 0.018 ppb             | 1,762 cps         | 5.7 %         |
| 166Er (KED) | 0.017 ppb             | 2,244 cps         | 2.3 %         |
| 169Tm (KED) | 0.000 ppb             | 489 cps           | 2.1 %         |
| 174Yb (KED) | 0.007 ppb             | 987 cps           | 2.1 %         |
| 175Lu (KED) | -0.020 ppb            | 10,985 cps        | 2.2 %         |
| 205Tl (KED) | 0.002 ppb             | 752 cps           | 8.1 %         |
| 208Pb (KED) | 0.053 ppb             | 51,427 cps        | 1.4 %         |
| 209Bi (KED) | 126.100 %             | 2,286,309 cps     | 2.1 %         |
| 232Th (KED) | -0.124 ppb            | 17,517 cps        | 2.0 %         |
| 238U (KED)  | 0.011 ppb             | 4,434 cps         | 5.0 %         |

## Sample Summary

Instrument ID: iCAP Q

Analysis index: 26

Analysis name: 81482jian

Analysis started at: 10/12/2021 4:32:01 PM

User name: WINDOWS-UPCI4ER\Administrator

| Category    | Concentration average | Concentration RSD |
|-------------|-----------------------|-------------------|
| 6Li (KED)   | 127.739 %             | 3.9 %             |
| 9Be (KED)   | 0.004 ppb             | 441.6 %           |
| 11B (KED)   | 6.240 ppb             | 14.2 %            |
| 24Mg (KED)  | 239.931 ppb           | 2.2 %             |
| 27Al (KED)  | 126.301 ppb           | 1.8 %             |
| 45Sc (KED)  | 122.767 %             | 0.4 %             |
| 51V (KED)   | 0.257 ppb             | 3.1 %             |
| 52Cr (KED)  | 1.009 ppb             | 0.6 %             |
| 55Mn (KED)  | 4.966 ppb             | 0.8 %             |
| 56Fe (KED)  | 145.982 ppb           | 1.0 %             |
| 58Ni (KED)  | 0.607 ppb             | 2.9 %             |
| 59Co (KED)  | 0.064 ppb             | 0.7 %             |
| 63Cu (KED)  | 5.405 ppb             | 2.4 %             |
| 64Zn (KED)  | 49.464 ppb            | 0.6 %             |
| 69Ga (KED)  | 0.647 ppb             | 1.1 %             |
| 75As (KED)  | 0.073 ppb             | 10.3 %            |
| 80Se (KED)  | -0.015 ppb            | 676.4 %           |
| 85Rb (KED)  | 1.453 ppb             | 0.5 %             |
| 88Sr (KED)  | 2.694 ppb             | 0.5 %             |
| 89Y (KED)   | 118.992 %             | 0.8 %             |
| 107Ag (KED) | 0.810 ppb             | 1.0 %             |
| 114Cd (KED) | 0.029 ppb             | 12.7 %            |
| 115In (KED) | 116.386 %             | 0.5 %             |
| 133Cs (KED) | 0.017 ppb             | 7.7 %             |
| 138Ba (KED) | 2.197 ppb             | 1.4 %             |
| 139La (KED) | 0.110 ppb             | 1.3 %             |
| 140Ce (KED) | 0.542 ppb             | 2.1 %             |
| 141Pr (KED) | 0.026 ppb             | 0.9 %             |
| 142Nd (KED) | 0.249 ppb             | 1.7 %             |
| 152Sm (KED) | 0.019 ppb             | 5.3 %             |
| 153Eu (KED) | 0.002 ppb             | 10.6 %            |
| 158Gd (KED) | 0.017 ppb             | 5.2 %             |
| 159Tb (KED) | 121.327 %             | 1.1 %             |
| 164Dy (KED) | 0.012 ppb             | 11.3 %            |
| 166Er (KED) | 0.015 ppb             | 2.2 %             |
| 169Tm (KED) | 0.000 ppb             | 15.3 %            |
| 174Yb (KED) | 0.004 ppb             | 13.5 %            |
| 175Lu (KED) | -0.020 ppb            | 6.2 %             |
| 205Tl (KED) | 0.002 ppb             | 13.0 %            |
| 208Pb (KED) | 0.359 ppb             | 1.6 %             |
| 209Bi (KED) | 114.863 %             | 0.4 %             |
| 232Th (KED) | -0.143 ppb            | 0.5 %             |
| 238U (KED)  | 0.008 ppb             | 3.1 %             |

| Category   | Concentration average | Intensity average | Intensity RSD |
|------------|-----------------------|-------------------|---------------|
| 6Li (KED)  | 127.739 %             | 1,750 cps         | 3.9 %         |
| 9Be (KED)  | 0.004 ppb             | 2 cps             | 173.2 %       |
| 11B (KED)  | 6.240 ppb             | 1,477 cps         | 3.7 %         |
| 24Mg (KED) | 239.931 ppb           | 185,274 cps       | 1.7 %         |
| 27Al (KED) | 126.301 ppb           | 25,747 cps        | 1.8 %         |

| Category    | Concentration average | Intensity average | Intensity RSD |
|-------------|-----------------------|-------------------|---------------|
| 45Sc (KED)  | 122.767 %             | 32,214 cps        | 0.4 %         |
| 51V (KED)   | 0.257 ppb             | 2,993 cps         | 3.2 %         |
| 52Cr (KED)  | 1.009 ppb             | 18,014 cps        | 0.7 %         |
| 55Mn (KED)  | 4.966 ppb             | 46,217 cps        | 1.0 %         |
| 56Fe (KED)  | 145.982 ppb           | 2,388,262 cps     | 1.2 %         |
| 58Ni (KED)  | 0.607 ppb             | 14,862 cps        | 2.9 %         |
| 59Co (KED)  | 0.064 ppb             | 2,336 cps         | 0.7 %         |
| 63Cu (KED)  | 5.405 ppb             | 135,814 cps       | 2.2 %         |
| 64Zn (KED)  | 49.464 ppb            | 410,081 cps       | 0.7 %         |
| 69Ga (KED)  | 0.647 ppb             | 5,913 cps         | 1.6 %         |
| 75As (KED)  | 0.073 ppb             | 179 cps           | 9.4 %         |
| 80Se (KED)  | -0.015 ppb            | 2,236 cps         | 3.5 %         |
| 85Rb (KED)  | 1.453 ppb             | 12,109 cps        | 1.0 %         |
| 88Sr (KED)  | 2.694 ppb             | 32,080 cps        | 0.7 %         |
| 89Y (KED)   | 118.992 %             | 282,440 cps       | 0.8 %         |
| 107Ag (KED) | 0.810 ppb             | 53,000 cps        | 1.4 %         |
| 114Cd (KED) | 0.029 ppb             | 1,681 cps         | 5.9 %         |
| 115In (KED) | 116.386 %             | 505,392 cps       | 0.5 %         |
| 133Cs (KED) | 0.017 ppb             | 891 cps           | 6.0 %         |
| 138Ba (KED) | 2.197 ppb             | 120,419 cps       | 0.9 %         |
| 139La (KED) | 0.110 ppb             | 12,943 cps        | 2.2 %         |
| 140Ce (KED) | 0.542 ppb             | 79,892 cps        | 1.1 %         |
| 141Pr (KED) | 0.026 ppb             | 4,386 cps         | 0.2 %         |
| 142Nd (KED) | 0.249 ppb             | 15,687 cps        | 1.2 %         |
| 152Sm (KED) | 0.019 ppb             | 1,141 cps         | 3.9 %         |
| 153Eu (KED) | 0.002 ppb             | 447 cps           | 5.9 %         |
| 158Gd (KED) | 0.017 ppb             | 1,342 cps         | 3.9 %         |
| 159Tb (KED) | 121.327 %             | 2,467,524 cps     | 1.1 %         |
| 164Dy (KED) | 0.012 ppb             | 1,143 cps         | 10.1 %        |
| 166Er (KED) | 0.015 ppb             | 1,832 cps         | 1.5 %         |
| 169Tm (KED) | 0.000 ppb             | 283 cps           | 8.2 %         |
| 174Yb (KED) | 0.004 ppb             | 648 cps           | 9.8 %         |
| 175Lu (KED) | -0.020 ppb            | 9,847 cps         | 3.2 %         |
| 205Tl (KED) | 0.002 ppb             | 719 cps           | 7.7 %         |
| 208Pb (KED) | 0.359 ppb             | 92,998 cps        | 0.5 %         |
| 209Bi (KED) | 114.863 %             | 2,082,572 cps     | 0.4 %         |
| 232Th (KED) | -0.143 ppb            | 10,130 cps        | 2.6 %         |
| 238U (KED)  | 0.008 ppb             | 3,254 cps         | 2.3 %         |

## Sample Summary

Instrument ID: iCAP Q

Analysis index: 27

Analysis name: 2013jian

Analysis started at: 10/12/2021 4:36:11 PM

User name: WINDOWS-UPCI4ER\Administrator

| Category    | Concentration average | Concentration RSD |
|-------------|-----------------------|-------------------|
| 6Li (KED)   | 142.826 %             | 4.7 %             |
| 9Be (KED)   | 0.012 ppb             | 133.0 %           |
| 11B (KED)   | 0.174 ppb             | 347.3 %           |
| 24Mg (KED)  | 154.838 ppb           | 5.6 %             |
| 27Al (KED)  | 100.282 ppb           | 1.3 %             |
| 45Sc (KED)  | 141.696 %             | 0.4 %             |
| 51V (KED)   | 0.186 ppb             | 1.0 %             |
| 52Cr (KED)  | 0.451 ppb             | 2.2 %             |
| 55Mn (KED)  | 4.406 ppb             | 1.0 %             |
| 56Fe (KED)  | 118.186 ppb           | 0.6 %             |
| 58Ni (KED)  | 0.570 ppb             | 3.3 %             |
| 59Co (KED)  | 0.046 ppb             | 5.3 %             |
| 63Cu (KED)  | 5.511 ppb             | 2.5 %             |
| 64Zn (KED)  | 46.660 ppb            | 2.0 %             |
| 69Ga (KED)  | 0.578 ppb             | 2.3 %             |
| 75As (KED)  | 0.077 ppb             | 5.5 %             |
| 80Se (KED)  | -0.437 ppb            | 4.8 %             |
| 85Rb (KED)  | 1.031 ppb             | 0.5 %             |
| 88Sr (KED)  | 2.320 ppb             | 1.7 %             |
| 89Y (KED)   | 135.769 %             | 2.0 %             |
| 107Ag (KED) | 0.196 ppb             | 1.6 %             |
| 114Cd (KED) | -0.013 ppb            | 11.1 %            |
| 115In (KED) | 130.028 %             | 1.1 %             |
| 133Cs (KED) | 0.015 ppb             | 11.2 %            |
| 138Ba (KED) | 2.074 ppb             | 3.5 %             |
| 139La (KED) | 0.107 ppb             | 4.3 %             |
| 140Ce (KED) | 0.648 ppb             | 3.3 %             |
| 141Pr (KED) | 0.024 ppb             | 5.2 %             |
| 142Nd (KED) | 0.278 ppb             | 1.5 %             |
| 152Sm (KED) | 0.016 ppb             | 6.5 %             |
| 153Eu (KED) | 0.002 ppb             | 34.3 %            |
| 158Gd (KED) | 0.014 ppb             | 2.4 %             |
| 159Tb (KED) | 137.382 %             | 2.2 %             |
| 164Dy (KED) | 0.010 ppb             | 8.8 %             |
| 166Er (KED) | 0.023 ppb             | 6.2 %             |
| 169Tm (KED) | -0.001 ppb            | 8.5 %             |
| 174Yb (KED) | 0.004 ppb             | 13.1 %            |
| 175Lu (KED) | -0.021 ppb            | 5.4 %             |
| 205Tl (KED) | 0.002 ppb             | 12.6 %            |
| 208Pb (KED) | 0.033 ppb             | 14.1 %            |
| 209Bi (KED) | 130.142 %             | 1.0 %             |
| 232Th (KED) | -0.145 ppb            | 0.4 %             |
| 238U (KED)  | 0.009 ppb             | 4.2 %             |

| Category   | Concentration average | Intensity average | Intensity RSD |
|------------|-----------------------|-------------------|---------------|
| 6Li (KED)  | 142.826 %             | 1,957 cps         | 4.7 %         |
| 9Be (KED)  | 0.012 ppb             | 4 cps             | 86.6 %        |
| 11B (KED)  | 0.174 ppb             | 874 cps           | 4.5 %         |
| 24Mg (KED) | 154.838 ppb           | 133,644 cps       | 1.0 %         |
| 27Al (KED) | 100.282 ppb           | 23,638 cps        | 0.9 %         |

| Category    | Concentration average | Intensity average | Intensity RSD |
|-------------|-----------------------|-------------------|---------------|
| 45Sc (KED)  | 141.696 %             | 37,181 cps        | 0.4 %         |
| 51V (KED)   | 0.186 ppb             | 2,516 cps         | 1.0 %         |
| 52Cr (KED)  | 0.451 ppb             | 9,406 cps         | 2.1 %         |
| 55Mn (KED)  | 4.406 ppb             | 47,349 cps        | 1.3 %         |
| 56Fe (KED)  | 118.186 ppb           | 2,232,549 cps     | 0.9 %         |
| 58Ni (KED)  | 0.570 ppb             | 16,258 cps        | 2.6 %         |
| 59Co (KED)  | 0.046 ppb             | 1,975 cps         | 4.5 %         |
| 63Cu (KED)  | 5.511 ppb             | 157,913 cps       | 0.5 %         |
| 64Zn (KED)  | 46.660 ppb            | 441,450 cps       | 0.3 %         |
| 69Ga (KED)  | 0.578 ppb             | 6,043 cps         | 2.2 %         |
| 75As (KED)  | 0.077 ppb             | 214 cps           | 4.7 %         |
| 80Se (KED)  | -0.437 ppb            | 2,166 cps         | 1.5 %         |
| 85Rb (KED)  | 1.031 ppb             | 9,814 cps         | 2.4 %         |
| 88Sr (KED)  | 2.320 ppb             | 31,564 cps        | 2.1 %         |
| 89Y (KED)   | 135.769 %             | 322,260 cps       | 2.0 %         |
| 107Ag (KED) | 0.196 ppb             | 15,048 cps        | 0.6 %         |
| 114Cd (KED) | -0.013 ppb            | 620 cps           | 8.0 %         |
| 115In (KED) | 130.028 %             | 564,631 cps       | 1.1 %         |
| 133Cs (KED) | 0.015 ppb             | 887 cps           | 8.5 %         |
| 138Ba (KED) | 2.074 ppb             | 128,826 cps       | 1.2 %         |
| 139La (KED) | 0.107 ppb             | 14,248 cps        | 1.9 %         |
| 140Ce (KED) | 0.648 ppb             | 108,017 cps       | 2.0 %         |
| 141Pr (KED) | 0.024 ppb             | 4,756 cps         | 3.4 %         |
| 142Nd (KED) | 0.278 ppb             | 19,805 cps        | 0.9 %         |
| 152Sm (KED) | 0.016 ppb             | 1,146 cps         | 6.7 %         |
| 153Eu (KED) | 0.002 ppb             | 468 cps           | 14.5 %        |
| 158Gd (KED) | 0.014 ppb             | 1,316 cps         | 4.1 %         |
| 159Tb (KED) | 137.382 %             | 2,794,045 cps     | 2.2 %         |
| 164Dy (KED) | 0.010 ppb             | 1,113 cps         | 5.1 %         |
| 166Er (KED) | 0.023 ppb             | 2,925 cps         | 4.5 %         |
| 169Tm (KED) | -0.001 ppb            | 300 cps           | 4.8 %         |
| 174Yb (KED) | 0.004 ppb             | 706 cps           | 12.1 %        |
| 175Lu (KED) | -0.021 ppb            | 11,030 cps        | 0.1 %         |
| 205Tl (KED) | 0.002 ppb             | 739 cps           | 6.3 %         |
| 208Pb (KED) | 0.033 ppb             | 49,718 cps        | 0.9 %         |
| 209Bi (KED) | 130.142 %             | 2,359,588 cps     | 1.0 %         |
| 232Th (KED) | -0.145 ppb            | 10,847 cps        | 2.3 %         |
| 238U (KED)  | 0.009 ppb             | 3,926 cps         | 3.0 %         |

## Sample Summary

Instrument ID: iCAP Q

Analysis index: 28

Analysis name: 2316jian

Analysis started at: 10/12/2021 4:39:57 PM

User name: WINDOWS-UPCI4ER\Administrator

| Category    | Concentration average | Concentration RSD |
|-------------|-----------------------|-------------------|
| 6Li (KED)   | 136.337 %             | 7.4 %             |
| 9Be (KED)   | 0.003 ppb             | 556.7 %           |
| 11B (KED)   | -2.356 ppb            | 7.2 %             |
| 24Mg (KED)  | 116.197 ppb           | 9.0 %             |
| 27Al (KED)  | 108.791 ppb           | 2.8 %             |
| 45Sc (KED)  | 122.652 %             | 2.6 %             |
| 51V (KED)   | 0.192 ppb             | 2.8 %             |
| 52Cr (KED)  | 0.474 ppb             | 2.6 %             |
| 55Mn (KED)  | 4.358 ppb             | 1.5 %             |
| 56Fe (KED)  | 151.175 ppb           | 2.0 %             |
| 58Ni (KED)  | 0.593 ppb             | 1.4 %             |
| 59Co (KED)  | 0.055 ppb             | 6.0 %             |
| 63Cu (KED)  | 6.946 ppb             | 1.6 %             |
| 64Zn (KED)  | 49.345 ppb            | 1.7 %             |
| 69Ga (KED)  | 0.613 ppb             | 2.4 %             |
| 75As (KED)  | 0.068 ppb             | 23.1 %            |
| 80Se (KED)  | -0.282 ppb            | 17.1 %            |
| 85Rb (KED)  | 0.756 ppb             | 1.2 %             |
| 88Sr (KED)  | 2.228 ppb             | 1.7 %             |
| 89Y (KED)   | 121.024 %             | 0.4 %             |
| 107Ag (KED) | 0.446 ppb             | 0.9 %             |
| 114Cd (KED) | 0.033 ppb             | 10.2 %            |
| 115In (KED) | 117.928 %             | 0.8 %             |
| 133Cs (KED) | 0.015 ppb             | 7.4 %             |
| 138Ba (KED) | 2.090 ppb             | 0.6 %             |
| 139La (KED) | 0.117 ppb             | 3.7 %             |
| 140Ce (KED) | 0.633 ppb             | 2.3 %             |
| 141Pr (KED) | 0.027 ppb             | 3.0 %             |
| 142Nd (KED) | 0.272 ppb             | 2.4 %             |
| 152Sm (KED) | 0.017 ppb             | 8.7 %             |
| 153Eu (KED) | 0.002 ppb             | 22.6 %            |
| 158Gd (KED) | 0.016 ppb             | 2.7 %             |
| 159Tb (KED) | 123.226 %             | 1.0 %             |
| 164Dy (KED) | 0.010 ppb             | 6.0 %             |
| 166Er (KED) | 0.018 ppb             | 4.4 %             |
| 169Tm (KED) | -0.001 ppb            | 26.3 %            |
| 174Yb (KED) | 0.004 ppb             | 11.2 %            |
| 175Lu (KED) | -0.021 ppb            | 2.3 %             |
| 205Tl (KED) | 0.002 ppb             | 27.6 %            |
| 208Pb (KED) | 0.396 ppb             | 2.8 %             |
| 209Bi (KED) | 116.686 %             | 0.8 %             |
| 232Th (KED) | -0.145 ppb            | 0.2 %             |
| 238U (KED)  | 0.009 ppb             | 2.2 %             |

| Category   | Concentration average | Intensity average | Intensity RSD |
|------------|-----------------------|-------------------|---------------|
| 6Li (KED)  | 136.337 %             | 1,868 cps         | 7.4 %         |
| 9Be (KED)  | 0.003 ppb             | 2 cps             | 173.2 %       |
| 11B (KED)  | -2.356 ppb            | 528 cps           | 9.0 %         |
| 24Mg (KED) | 116.197 ppb           | 95,559 cps        | 1.5 %         |
| 27Al (KED) | 108.791 ppb           | 22,172 cps        | 0.7 %         |

| Category    | Concentration average | Intensity average | Intensity RSD |
|-------------|-----------------------|-------------------|---------------|
| 45Sc (KED)  | 122.652 %             | 32,184 cps        | 2.6 %         |
| 51V (KED)   | 0.192 ppb             | 2,240 cps         | 1.3 %         |
| 52Cr (KED)  | 0.474 ppb             | 8,535 cps         | 0.7 %         |
| 55Mn (KED)  | 4.358 ppb             | 40,531 cps        | 1.3 %         |
| 56Fe (KED)  | 151.175 ppb           | 2,469,890 cps     | 0.8 %         |
| 58Ni (KED)  | 0.593 ppb             | 14,552 cps        | 1.8 %         |
| 59Co (KED)  | 0.055 ppb             | 2,026 cps         | 3.8 %         |
| 63Cu (KED)  | 6.946 ppb             | 177,186 cps       | 1.7 %         |
| 64Zn (KED)  | 49.345 ppb            | 416,100 cps       | 1.9 %         |
| 69Ga (KED)  | 0.613 ppb             | 5,705 cps         | 2.1 %         |
| 75As (KED)  | 0.068 ppb             | 170 cps           | 21.2 %        |
| 80Se (KED)  | -0.282 ppb            | 2,057 cps         | 2.3 %         |
| 85Rb (KED)  | 0.756 ppb             | 6,422 cps         | 1.4 %         |
| 88Sr (KED)  | 2.228 ppb             | 27,034 cps        | 1.9 %         |
| 89Y (KED)   | 121.024 %             | 287,264 cps       | 0.4 %         |
| 107Ag (KED) | 0.446 ppb             | 29,976 cps        | 0.8 %         |
| 114Cd (KED) | 0.033 ppb             | 1,823 cps         | 5.6 %         |
| 115In (KED) | 117.928 %             | 512,089 cps       | 0.8 %         |
| 133Cs (KED) | 0.015 ppb             | 826 cps           | 5.8 %         |
| 138Ba (KED) | 2.090 ppb             | 116,453 cps       | 0.4 %         |
| 139La (KED) | 0.117 ppb             | 13,921 cps        | 3.1 %         |
| 140Ce (KED) | 0.633 ppb             | 94,708 cps        | 1.5 %         |
| 141Pr (KED) | 0.027 ppb             | 4,633 cps         | 2.1 %         |
| 142Nd (KED) | 0.272 ppb             | 17,369 cps        | 1.4 %         |
| 152Sm (KED) | 0.017 ppb             | 1,067 cps         | 7.1 %         |
| 153Eu (KED) | 0.002 ppb             | 484 cps           | 11.5 %        |
| 158Gd (KED) | 0.016 ppb             | 1,266 cps         | 2.7 %         |
| 159Tb (KED) | 123.226 %             | 2,506,149 cps     | 1.0 %         |
| 164Dy (KED) | 0.010 ppb             | 1,018 cps         | 5.8 %         |
| 166Er (KED) | 0.018 ppb             | 2,091 cps         | 4.6 %         |
| 169Tm (KED) | -0.001 ppb            | 256 cps           | 19.8 %        |
| 174Yb (KED) | 0.004 ppb             | 557 cps           | 7.3 %         |
| 175Lu (KED) | -0.021 ppb            | 9,887 cps         | 0.5 %         |
| 205Tl (KED) | 0.002 ppb             | 653 cps           | 13.4 %        |
| 208Pb (KED) | 0.396 ppb             | 100,189 cps       | 1.6 %         |
| 209Bi (KED) | 116.686 %             | 2,115,623 cps     | 0.8 %         |
| 232Th (KED) | -0.145 ppb            | 9,851 cps         | 0.5 %         |
| 238U (KED)  | 0.009 ppb             | 3,576 cps         | 2.4 %         |

## Sample Summary

Instrument ID: iCAP Q

Analysis index: 29

Analysis name: 3491jian

Analysis started at: 10/12/2021 4:43:56 PM

User name: WINDOWS-UPCI4ER\Administrator

| Category    | Concentration average | Concentration RSD |
|-------------|-----------------------|-------------------|
| 6Li (KED)   | 124.495 %             | 3.9 %             |
| 9Be (KED)   | -0.006 ppb            | 0.0 %             |
| 11B (KED)   | 3.719 ppb             | 5.1 %             |
| 24Mg (KED)  | 213.304 ppb           | 4.4 %             |
| 27Al (KED)  | 165.104 ppb           | 1.5 %             |
| 45Sc (KED)  | 123.281 %             | 1.4 %             |
| 51V (KED)   | 0.312 ppb             | 0.9 %             |
| 52Cr (KED)  | 0.774 ppb             | 2.4 %             |
| 55Mn (KED)  | 7.163 ppb             | 0.6 %             |
| 56Fe (KED)  | 231.646 ppb           | 1.2 %             |
| 58Ni (KED)  | 0.977 ppb             | 2.3 %             |
| 59Co (KED)  | 0.075 ppb             | 1.0 %             |
| 63Cu (KED)  | 8.513 ppb             | 0.6 %             |
| 64Zn (KED)  | 49.044 ppb            | 0.7 %             |
| 69Ga (KED)  | 0.863 ppb             | 1.2 %             |
| 75As (KED)  | 0.103 ppb             | 5.2 %             |
| 80Se (KED)  | -0.268 ppb            | 59.2 %            |
| 85Rb (KED)  | 1.305 ppb             | 1.9 %             |
| 88Sr (KED)  | 3.512 ppb             | 1.9 %             |
| 89Y (KED)   | 120.144 %             | 0.6 %             |
| 107Ag (KED) | 0.458 ppb             | 1.4 %             |
| 114Cd (KED) | 0.020 ppb             | 15.6 %            |
| 115In (KED) | 117.624 %             | 0.8 %             |
| 133Cs (KED) | 0.028 ppb             | 3.7 %             |
| 138Ba (KED) | 2.976 ppb             | 2.1 %             |
| 139La (KED) | 0.174 ppb             | 1.7 %             |
| 140Ce (KED) | 1.092 ppb             | 2.0 %             |
| 141Pr (KED) | 0.040 ppb             | 4.3 %             |
| 142Nd (KED) | 0.450 ppb             | 2.8 %             |
| 152Sm (KED) | 0.026 ppb             | 3.7 %             |
| 153Eu (KED) | 0.003 ppb             | 3.9 %             |
| 158Gd (KED) | 0.024 ppb             | 3.6 %             |
| 159Tb (KED) | 123.315 %             | 1.5 %             |
| 164Dy (KED) | 0.018 ppb             | 4.4 %             |
| 166Er (KED) | 0.032 ppb             | 0.6 %             |
| 169Tm (KED) | 0.000 ppb             | 73.3 %            |
| 174Yb (KED) | 0.006 ppb             | 0.9 %             |
| 175Lu (KED) | -0.019 ppb            | 11.5 %            |
| 205Tl (KED) | 0.002 ppb             | 7.5 %             |
| 208Pb (KED) | 0.493 ppb             | 2.8 %             |
| 209Bi (KED) | 115.685 %             | 0.4 %             |
| 232Th (KED) | -0.125 ppb            | 0.9 %             |
| 238U (KED)  | 0.014 ppb             | 2.8 %             |

| Category   | Concentration average | Intensity average | Intensity RSD |
|------------|-----------------------|-------------------|---------------|
| 6Li (KED)  | 124.495 %             | 1,706 cps         | 3.9 %         |
| 9Be (KED)  | -0.006 ppb            | 0 cps             |               |
| 11B (KED)  | 3.719 ppb             | 1,160 cps         | 4.3 %         |
| 24Mg (KED) | 213.304 ppb           | 160,469 cps       | 0.5 %         |
| 27Al (KED) | 165.104 ppb           | 33,737 cps        | 0.3 %         |

| Category    | Concentration average | Intensity average | Intensity RSD |
|-------------|-----------------------|-------------------|---------------|
| 45Sc (KED)  | 123.281 %             | 32,349 cps        | 1.4 %         |
| 51V (KED)   | 0.312 ppb             | 3,644 cps         | 1.1 %         |
| 52Cr (KED)  | 0.774 ppb             | 13,906 cps        | 2.1 %         |
| 55Mn (KED)  | 7.163 ppb             | 66,894 cps        | 1.0 %         |
| 56Fe (KED)  | 231.646 ppb           | 3,802,749 cps     | 0.3 %         |
| 58Ni (KED)  | 0.977 ppb             | 22,752 cps        | 1.1 %         |
| 59Co (KED)  | 0.075 ppb             | 2,706 cps         | 0.6 %         |
| 63Cu (KED)  | 8.513 ppb             | 215,298 cps       | 0.8 %         |
| 64Zn (KED)  | 49.044 ppb            | 410,563 cps       | 0.9 %         |
| 69Ga (KED)  | 0.863 ppb             | 7,913 cps         | 1.1 %         |
| 75As (KED)  | 0.103 ppb             | 251 cps           | 5.4 %         |
| 80Se (KED)  | -0.268 ppb            | 2,052 cps         | 5.7 %         |
| 85Rb (KED)  | 1.305 ppb             | 10,982 cps        | 1.9 %         |
| 88Sr (KED)  | 3.512 ppb             | 42,150 cps        | 1.6 %         |
| 89Y (KED)   | 120.144 %             | 285,174 cps       | 0.6 %         |
| 107Ag (KED) | 0.458 ppb             | 30,653 cps        | 2.1 %         |
| 114Cd (KED) | 0.020 ppb             | 1,463 cps         | 5.4 %         |
| 115In (KED) | 117.624 %             | 510,767 cps       | 0.8 %         |
| 133Cs (KED) | 0.028 ppb             | 1,309 cps         | 2.9 %         |
| 138Ba (KED) | 2.976 ppb             | 164,969 cps       | 1.3 %         |
| 139La (KED) | 0.174 ppb             | 20,482 cps        | 0.7 %         |
| 140Ce (KED) | 1.092 ppb             | 163,105 cps       | 0.5 %         |
| 141Pr (KED) | 0.040 ppb             | 6,749 cps         | 2.6 %         |
| 142Nd (KED) | 0.450 ppb             | 28,636 cps        | 1.8 %         |
| 152Sm (KED) | 0.026 ppb             | 1,602 cps         | 3.7 %         |
| 153Eu (KED) | 0.003 ppb             | 639 cps           | 3.1 %         |
| 158Gd (KED) | 0.024 ppb             | 1,896 cps         | 2.1 %         |
| 159Tb (KED) | 123.315 %             | 2,507,962 cps     | 1.5 %         |
| 164Dy (KED) | 0.018 ppb             | 1,600 cps         | 4.2 %         |
| 166Er (KED) | 0.032 ppb             | 3,513 cps         | 1.0 %         |
| 169Tm (KED) | 0.000 ppb             | 387 cps           | 10.5 %        |
| 174Yb (KED) | 0.006 ppb             | 816 cps           | 1.7 %         |
| 175Lu (KED) | -0.019 ppb            | 10,279 cps        | 3.6 %         |
| 205Tl (KED) | 0.002 ppb             | 841 cps           | 4.2 %         |
| 208Pb (KED) | 0.493 ppb             | 114,025 cps       | 1.9 %         |
| 209Bi (KED) | 115.685 %             | 2,097,466 cps     | 0.4 %         |
| 232Th (KED) | -0.125 ppb            | 15,699 cps        | 1.8 %         |
| 238U (KED)  | 0.014 ppb             | 5,126 cps         | 2.3 %         |
