# Supplementary material for: Geographic and breed-specific traceability of cashmere via mineral element profiling in Inner Mongolia (Ordos, Chifeng, and Alxa League)
Source: Royal Society of Chemistry journal article supplement (doi:10.1039/d5ra08122j), 2026-01-01
Supplement: d5ra08122j1.zip [file 20211014-min gai (1-24) wang zhe ping yan xin gang.pdf › ԭʼ޿/20211014-min gai (1-24) wang zhe ping yan xin gang.pdf]

## Instrument Summary:

Instrument ID: iCAP Q  
Serial Number: Undefined

## Labbook Summary:

Path and filename: \_Application Data\Workspace\LabBooks\wlw\20211014-2.imexp  
Labbook created by: Administrator  
Based on template:  
Hardware configuration: iCAPQ1  
Labbook type: eQuant  
Qtegra version (last saved): 2.7.2425.154  
Labbook started: 10/14/2021 3:19:09 PM  
Labbook finished: 10/14/2021 4:40:50 PM















<sup>238</sup>U (KED)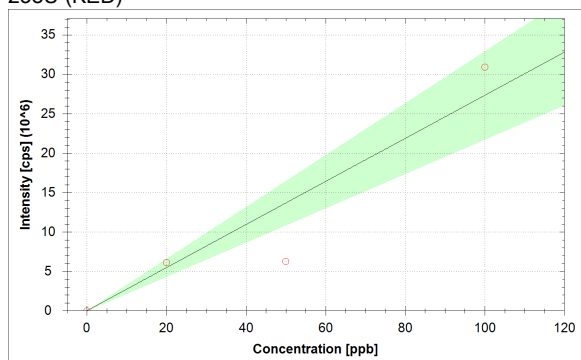

$$f(x) = 273354.4197 \cdot x + 39.4685$$

$$R^2 = 0.8960$$

$$\text{BEC} = 0.000 \text{ ppb}$$

$$\text{LoD} = \text{N/A}$$











## Sample Summary

Instrument ID: iCAP Q

Analysis index: 1

Analysis name: water

Analysis started at: 10/14/2021 3:19:13 PM

User name: WINDOWS-UPCI4ER\Administrator

| Category    | Concentration average | Concentration RSD |
|-------------|-----------------------|-------------------|
| 6Li (KED)   | 0.000 %               |                   |
| 11B (KED)   | Infinity ppb          |                   |
| 24Mg (KED)  | Infinity ppb          |                   |
| 27Al (KED)  | 117.159 ppb           |                   |
| 45Sc (KED)  | 0.032 %               |                   |
| 51V (KED)   | 1.177 ppb             |                   |
| 52Cr (KED)  | 8.241 ppb             |                   |
| 55Mn (KED)  | 8.191 ppb             |                   |
| 56Fe (KED)  | 120.869 ppb           |                   |
| 58Ni (KED)  | 26.729 ppb            |                   |
| 59Co (KED)  | 0.402 ppb             |                   |
| 63Cu (KED)  | Infinity ppb          |                   |
| 64Zn (KED)  | Infinity ppb          |                   |
| 69Ga (KED)  | Infinity ppb          |                   |
| 75As (KED)  | Infinity ppb          |                   |
| 80Se (KED)  | Infinity ppb          |                   |
| 85Rb (KED)  | Infinity ppb          |                   |
| 88Sr (KED)  | Infinity ppb          |                   |
| 89Y (KED)   | 0.000 %               |                   |
| 107Ag (KED) | Infinity ppb          |                   |
| 114Cd (KED) | Infinity ppb          |                   |
| 115In (KED) | 0.000 %               |                   |
| 133Cs (KED) | Infinity ppb          |                   |
| 138Ba (KED) | Infinity ppb          |                   |
| 140Ce (KED) | Infinity ppb          |                   |
| 142Nd (KED) | Infinity ppb          |                   |
| 159Tb (KED) | 0.000 %               |                   |
| 205Tl (KED) | 10.913 ppb            |                   |
| 208Pb (KED) | 69.107 ppb            |                   |
| 209Bi (KED) | 0.001 %               |                   |
| 232Th (KED) | 0.000 ppb             |                   |
| 238U (KED)  | 0.000 ppb             |                   |

| Category   | Concentration average | Intensity average | Intensity RSD |
|------------|-----------------------|-------------------|---------------|
| 6Li (KED)  | 0.000 %               | 0 cps             |               |
| 9Be (KED)  |                       | 0 cps             |               |
| 11B (KED)  | Infinity ppb          | 17 cps            |               |
| 24Mg (KED) | Infinity ppb          | 153 cps           |               |
| 27Al (KED) | 117.159 ppb           | 7 cps             |               |
| 45Sc (KED) | 0.032 %               | 20 cps            |               |
| 51V (KED)  | 1.177 ppb             | 3 cps             |               |
| 52Cr (KED) | 8.241 ppb             | 37 cps            |               |
| 55Mn (KED) | 8.191 ppb             | 20 cps            |               |
| 56Fe (KED) | 120.869 ppb           | 500 cps           |               |
| 58Ni (KED) | 26.729 ppb            | 133 cps           |               |
| 59Co (KED) | 0.402 ppb             | 3 cps             |               |
| 63Cu (KED) | Infinity ppb          | 83 cps            |               |
| 64Zn (KED) | Infinity ppb          | 1,503 cps         |               |
| 69Ga (KED) | Infinity ppb          | 10 cps            |               |
| 75As (KED) | Infinity ppb          | 7 cps             |               |







## Sample Summary

Instrument ID: iCAP Q

Analysis index: 3

Analysis name: 0+20

Analysis started at: 10/14/2021 3:23:15 PM

User name: WINDOWS-UPCI4ER\Administrator

| Category    | Concentration average | Concentration RSD |
|-------------|-----------------------|-------------------|
| 6Li (KED)   | 97.729 %              |                   |
| 9Be (KED)   | 0.000 ppb             |                   |
| 11B (KED)   | 0.000 ppb             |                   |
| 24Mg (KED)  | 0.000 ppb             |                   |
| 27Al (KED)  | 0.000 ppb             |                   |
| 45Sc (KED)  | 107.755 %             |                   |
| 51V (KED)   | 0.000 ppb             |                   |
| 52Cr (KED)  | 0.000 ppb             |                   |
| 55Mn (KED)  | 0.000 ppb             |                   |
| 56Fe (KED)  | 0.000 ppb             |                   |
| 58Ni (KED)  | 0.000 ppb             |                   |
| 59Co (KED)  | 0.000 ppb             |                   |
| 63Cu (KED)  | 0.000 ppb             |                   |
| 64Zn (KED)  | 0.000 ppb             |                   |
| 69Ga (KED)  | 0.000 ppb             |                   |
| 75As (KED)  | 0.000 ppb             |                   |
| 80Se (KED)  | 0.000 ppb             |                   |
| 85Rb (KED)  | 0.000 ppb             |                   |
| 88Sr (KED)  | 0.000 ppb             |                   |
| 89Y (KED)   | 103.029 %             |                   |
| 107Ag (KED) | 0.000 ppb             |                   |
| 114Cd (KED) | 0.000 ppb             |                   |
| 115In (KED) | 102.052 %             |                   |
| 133Cs (KED) | 0.000 ppb             |                   |
| 138Ba (KED) | 0.000 ppb             |                   |
| 139La (KED) | 0.000 ppb             |                   |
| 140Ce (KED) | 0.000 ppb             |                   |
| 141Pr (KED) | 0.000 ppb             |                   |
| 142Nd (KED) | 0.000 ppb             |                   |
| 152Sm (KED) | 0.000 ppb             |                   |
| 153Eu (KED) | 0.000 ppb             |                   |
| 158Gd (KED) | 0.000 ppb             |                   |
| 159Tb (KED) | 107.203 %             |                   |
| 164Dy (KED) | 0.000 ppb             |                   |
| 166Er (KED) | 0.000 ppb             |                   |
| 169Tm (KED) | 0.000 ppb             |                   |
| 174Yb (KED) | 0.000 ppb             |                   |
| 175Lu (KED) | 0.000 ppb             |                   |
| 205Tl (KED) | 0.000 ppb             |                   |
| 208Pb (KED) | 0.000 ppb             |                   |
| 209Bi (KED) | 101.347 %             |                   |
| 232Th (KED) | 0.000 ppb             |                   |
| 238U (KED)  | 0.000 ppb             |                   |

| Category   | Concentration average | Intensity average | Intensity RSD |
|------------|-----------------------|-------------------|---------------|
| 6Li (KED)  | 97.729 %              | 3,300 cps         |               |
| 9Be (KED)  | 0.000 ppb             | 0 cps             |               |
| 11B (KED)  | 0.000 ppb             | 1,230 cps         |               |
| 24Mg (KED) | 0.000 ppb             | 120 cps           |               |
| 27Al (KED) | 0.000 ppb             | 63 cps            |               |





| Category    | Concentration average | Intensity average | Intensity RSD |
|-------------|-----------------------|-------------------|---------------|
| 45Sc (KED)  | 111.224 %             | 69,198 cps        |               |
| 51V (KED)   | 23.393 ppb            | 229,029 cps       |               |
| 52Cr (KED)  | 22.896 ppb            | 352,051 cps       |               |
| 55Mn (KED)  | 22.844 ppb            | 192,696 cps       |               |
| 56Fe (KED)  | 22.924 ppb            | 330,870 cps       |               |
| 58Ni (KED)  | 23.858 ppb            | 411,804 cps       |               |
| 59Co (KED)  | 23.505 ppb            | 672,062 cps       |               |
| 63Cu (KED)  | 23.120 ppb            | 506,176 cps       |               |
| 64Zn (KED)  | 23.668 ppb            | 160,390 cps       |               |
| 69Ga (KED)  | 22.460 ppb            | 185,961 cps       |               |
| 75As (KED)  | 22.888 ppb            | 44,375 cps        |               |
| 80Se (KED)  | 24.008 ppb            | 18,307 cps        |               |
| 85Rb (KED)  | 23.618 ppb            | 178,866 cps       |               |
| 88Sr (KED)  | 22.753 ppb            | 247,508 cps       |               |
| 89Y (KED)   | 110.107 %             | 598,206 cps       |               |
| 107Ag (KED) | 24.730 ppb            | 1,370,012 cps     |               |
| 114Cd (KED) | 23.165 ppb            | 514,763 cps       |               |
| 115In (KED) | 109.905 %             | 1,050,552 cps     |               |
| 133Cs (KED) | 23.459 ppb            | 871,842 cps       |               |
| 138Ba (KED) | 22.000 ppb            | 1,064,211 cps     |               |
| 139La (KED) | 21.637 ppb            | 2,145,975 cps     |               |
| 140Ce (KED) | 21.431 ppb            | 2,738,515 cps     |               |
| 141Pr (KED) | 22.153 ppb            | 2,949,751 cps     |               |
| 142Nd (KED) | 22.335 ppb            | 1,179,534 cps     |               |
| 152Sm (KED) | 22.244 ppb            | 1,040,015 cps     |               |
| 153Eu (KED) | 21.348 ppb            | 2,040,289 cps     |               |
| 158Gd (KED) | 21.566 ppb            | 1,308,833 cps     |               |
| 159Tb (KED) | 113.743 %             | 4,969,845 cps     |               |
| 164Dy (KED) | 21.141 ppb            | 1,480,629 cps     |               |
| 166Er (KED) | 21.481 ppb            | 1,751,031 cps     |               |
| 169Tm (KED) | 22.992 ppb            | 6,110,696 cps     |               |
| 174Yb (KED) | 21.830 ppb            | 2,043,606 cps     |               |
| 175Lu (KED) | 20.864 ppb            | 3,641,688 cps     |               |
| 205Tl (KED) | 22.376 ppb            | 4,106,474 cps     |               |
| 208Pb (KED) | 22.651 ppb            | 2,876,012 cps     |               |
| 209Bi (KED) | 107.776 %             | 4,005,436 cps     |               |
| 232Th (KED) | 21.176 ppb            | 5,598,219 cps     |               |
| 238U (KED)  | 22.422 ppb            | 6,605,840 cps     |               |

## Sample Summary

Instrument ID: iCAP Q

Analysis index: 5

Analysis name: 50+20

Analysis started at: 10/14/2021 3:27:57 PM

User name: WINDOWS-UPCI4ER\Administrator

| Category    | Concentration average | Concentration RSD |
|-------------|-----------------------|-------------------|
| 6Li (KED)   | 105.628 %             |                   |
| 9Be (KED)   | 21.283 ppb            |                   |
| 11B (KED)   | 15.657 ppb            |                   |
| 24Mg (KED)  | 21.323 ppb            |                   |
| 27Al (KED)  | 21.136 ppb            |                   |
| 45Sc (KED)  | 117.803 %             |                   |
| 51V (KED)   | 22.511 ppb            |                   |
| 52Cr (KED)  | 21.704 ppb            |                   |
| 55Mn (KED)  | 22.632 ppb            |                   |
| 56Fe (KED)  | 22.057 ppb            |                   |
| 58Ni (KED)  | 22.894 ppb            |                   |
| 59Co (KED)  | 22.539 ppb            |                   |
| 63Cu (KED)  | 23.197 ppb            |                   |
| 64Zn (KED)  | 23.847 ppb            |                   |
| 69Ga (KED)  | 22.333 ppb            |                   |
| 75As (KED)  | 23.119 ppb            |                   |
| 80Se (KED)  | 23.766 ppb            |                   |
| 85Rb (KED)  | 23.467 ppb            |                   |
| 88Sr (KED)  | 22.995 ppb            |                   |
| 89Y (KED)   | 112.080 %             |                   |
| 107Ag (KED) | 23.908 ppb            |                   |
| 114Cd (KED) | 23.225 ppb            |                   |
| 115In (KED) | 112.899 %             |                   |
| 133Cs (KED) | 22.698 ppb            |                   |
| 138Ba (KED) | 22.175 ppb            |                   |
| 139La (KED) | 21.253 ppb            |                   |
| 140Ce (KED) | 20.812 ppb            |                   |
| 141Pr (KED) | 21.442 ppb            |                   |
| 142Nd (KED) | 21.779 ppb            |                   |
| 152Sm (KED) | 21.277 ppb            |                   |
| 153Eu (KED) | 21.366 ppb            |                   |
| 158Gd (KED) | 21.414 ppb            |                   |
| 159Tb (KED) | 118.490 %             |                   |
| 164Dy (KED) | 20.618 ppb            |                   |
| 166Er (KED) | 20.206 ppb            |                   |
| 169Tm (KED) | 22.136 ppb            |                   |
| 174Yb (KED) | 21.209 ppb            |                   |
| 175Lu (KED) | 20.722 ppb            |                   |
| 205Tl (KED) | 21.893 ppb            |                   |
| 208Pb (KED) | 22.294 ppb            |                   |
| 209Bi (KED) | 109.056 %             |                   |
| 232Th (KED) | 22.002 ppb            |                   |
| 238U (KED)  | 22.837 ppb            |                   |

| Category   | Concentration average | Intensity average | Intensity RSD |
|------------|-----------------------|-------------------|---------------|
| 6Li (KED)  | 105.628 %             | 3,567 cps         |               |
| 9Be (KED)  | 21.283 ppb            | 3,981 cps         |               |
| 11B (KED)  | 15.657 ppb            | 2,794 cps         |               |
| 24Mg (KED) | 21.323 ppb            | 15,770 cps        |               |
| 27Al (KED) | 21.136 ppb            | 4,464 cps         |               |



## Sample Summary

Instrument ID: iCAP Q

Analysis index: 6

Analysis name: 100+20

Analysis started at: 10/14/2021 3:30:39 PM

User name: WINDOWS-UPCI4ER\Administrator

| Category    | Concentration average | Concentration RSD |
|-------------|-----------------------|-------------------|
| 6Li (KED)   | 105.628 %             |                   |
| 9Be (KED)   | 113.929 ppb           |                   |
| 11B (KED)   | 117.558 ppb           |                   |
| 24Mg (KED)  | 114.229 ppb           |                   |
| 27Al (KED)  | 113.866 ppb           |                   |
| 45Sc (KED)  | 124.913 %             |                   |
| 51V (KED)   | 113.066 ppb           |                   |
| 52Cr (KED)  | 113.568 ppb           |                   |
| 55Mn (KED)  | 113.115 ppb           |                   |
| 56Fe (KED)  | 113.386 ppb           |                   |
| 58Ni (KED)  | 112.781 ppb           |                   |
| 59Co (KED)  | 113.030 ppb           |                   |
| 63Cu (KED)  | 112.778 ppb           |                   |
| 64Zn (KED)  | 112.343 ppb           |                   |
| 69Ga (KED)  | 113.342 ppb           |                   |
| 75As (KED)  | 112.863 ppb           |                   |
| 80Se (KED)  | 112.316 ppb           |                   |
| 85Rb (KED)  | 112.543 ppb           |                   |
| 88Sr (KED)  | 112.952 ppb           |                   |
| 89Y (KED)   | 121.151 %             |                   |
| 107Ag (KED) | 112.100 ppb           |                   |
| 114Cd (KED) | 112.754 ppb           |                   |
| 115In (KED) | 121.568 %             |                   |
| 133Cs (KED) | 112.959 ppb           |                   |
| 138Ba (KED) | 113.512 ppb           |                   |
| 139La (KED) | 114.046 ppb           |                   |
| 140Ce (KED) | 114.308 ppb           |                   |
| 141Pr (KED) | 113.849 ppb           |                   |
| 142Nd (KED) | 113.643 ppb           |                   |
| 152Sm (KED) | 113.913 ppb           |                   |
| 153Eu (KED) | 114.048 ppb           |                   |
| 158Gd (KED) | 113.980 ppb           |                   |
| 159Tb (KED) | 124.898 %             |                   |
| 164Dy (KED) | 114.463 ppb           |                   |
| 166Er (KED) | 114.601 ppb           |                   |
| 169Tm (KED) | 113.334 ppb           |                   |
| 174Yb (KED) | 114.029 ppb           |                   |
| 175Lu (KED) | 114.466 ppb           |                   |
| 205Tl (KED) | 113.578 ppb           |                   |
| 208Pb (KED) | 113.323 ppb           |                   |
| 209Bi (KED) | 117.080 %             |                   |
| 232Th (KED) | 113.764 ppb           |                   |
| 238U (KED)  | 113.097 ppb           |                   |

| Category   | Concentration average | Intensity average | Intensity RSD |
|------------|-----------------------|-------------------|---------------|
| 6Li (KED)  | 105.628 %             | 3,567 cps         |               |
| 9Be (KED)  | 113.929 ppb           | 21,308 cps        |               |
| 11B (KED)  | 117.558 ppb           | 12,323 cps        |               |
| 24Mg (KED) | 114.229 ppb           | 83,914 cps        |               |
| 27Al (KED) | 113.866 ppb           | 25,179 cps        |               |



## Sample Summary

Instrument ID: iCAP Q

Analysis index: 7

Analysis name: 2223ti

Analysis started at: 10/14/2021 3:34:04 PM

User name: WINDOWS-UPCI4ER\Administrator

| Category    | Concentration average | Concentration RSD |
|-------------|-----------------------|-------------------|
| 6Li (KED)   | 96.643 %              |                   |
| 9Be (KED)   | 0.039 ppb             |                   |
| 11B (KED)   | -5.334 ppb            |                   |
| 24Mg (KED)  | 177.429 ppb           |                   |
| 27Al (KED)  | 103.982 ppb           |                   |
| 45Sc (KED)  | 107.513 %             |                   |
| 51V (KED)   | 0.253 ppb             |                   |
| 52Cr (KED)  | 0.807 ppb             |                   |
| 55Mn (KED)  | 4.346 ppb             |                   |
| 56Fe (KED)  | 123.216 ppb           |                   |
| 58Ni (KED)  | 0.825 ppb             |                   |
| 59Co (KED)  | 0.048 ppb             |                   |
| 63Cu (KED)  | 3.920 ppb             |                   |
| 64Zn (KED)  | 61.294 ppb            |                   |
| 69Ga (KED)  | 0.663 ppb             |                   |
| 75As (KED)  | 0.129 ppb             |                   |
| 80Se (KED)  | 0.265 ppb             |                   |
| 85Rb (KED)  | 0.857 ppb             |                   |
| 88Sr (KED)  | 3.325 ppb             |                   |
| 89Y (KED)   | 106.869 %             |                   |
| 107Ag (KED) | 0.068 ppb             |                   |
| 114Cd (KED) | 0.017 ppb             |                   |
| 115In (KED) | 107.260 %             |                   |
| 133Cs (KED) | 0.022 ppb             |                   |
| 138Ba (KED) | 2.355 ppb             |                   |
| 139La (KED) | 0.107 ppb             |                   |
| 140Ce (KED) | 0.336 ppb             |                   |
| 141Pr (KED) | 0.026 ppb             |                   |
| 142Nd (KED) | 0.172 ppb             |                   |
| 152Sm (KED) | 0.018 ppb             |                   |
| 153Eu (KED) | 0.004 ppb             |                   |
| 158Gd (KED) | 0.016 ppb             |                   |
| 159Tb (KED) | 113.877 %             |                   |
| 164Dy (KED) | 0.011 ppb             |                   |
| 166Er (KED) | 0.012 ppb             |                   |
| 169Tm (KED) | 0.001 ppb             |                   |
| 174Yb (KED) | 0.006 ppb             |                   |
| 175Lu (KED) | -0.013 ppb            |                   |
| 205Tl (KED) | 0.008 ppb             |                   |
| 208Pb (KED) | 0.345 ppb             |                   |
| 209Bi (KED) | 102.874 %             |                   |
| 232Th (KED) | 0.139 ppb             |                   |
| 238U (KED)  | 0.015 ppb             |                   |

| Category   | Concentration average | Intensity average | Intensity RSD |
|------------|-----------------------|-------------------|---------------|
| 6Li (KED)  | 96.643 %              | 3,264 cps         |               |
| 9Be (KED)  | 0.039 ppb             | 7 cps             |               |
| 11B (KED)  | -5.334 ppb            | 760 cps           |               |
| 24Mg (KED) | 177.429 ppb           | 119,190 cps       |               |
| 27Al (KED) | 103.982 ppb           | 19,796 cps        |               |

















































| Category    | Concentration average | Intensity average | Intensity RSD |
|-------------|-----------------------|-------------------|---------------|
| 45Sc (KED)  | 121.727 %             | 75,732 cps        |               |
| 51V (KED)   | 0.271 ppb             | 2,907 cps         |               |
| 52Cr (KED)  | 0.455 ppb             | 7,909 cps         |               |
| 55Mn (KED)  | 5.573 ppb             | 51,590 cps        |               |
| 56Fe (KED)  | 173.672 ppb           | 2,718,857 cps     |               |
| 58Ni (KED)  | 1.130 ppb             | 21,609 cps        |               |
| 59Co (KED)  | 0.087 ppb             | 2,757 cps         |               |
| 63Cu (KED)  | 2.754 ppb             | 63,283 cps        |               |
| 64Zn (KED)  | 59.858 ppb            | 421,994 cps       |               |
| 69Ga (KED)  | 0.683 ppb             | 5,931 cps         |               |
| 75As (KED)  | 0.098 ppb             | 213 cps           |               |
| 80Se (KED)  | 0.286 ppb             | 2,954 cps         |               |
| 85Rb (KED)  | 0.993 ppb             | 7,866 cps         |               |
| 88Sr (KED)  | 4.431 ppb             | 50,378 cps        |               |
| 89Y (KED)   | 114.918 %             | 624,343 cps       |               |
| 107Ag (KED) | 0.016 ppb             | 957 cps           |               |
| 114Cd (KED) | 0.008 ppb             | 263 cps           |               |
| 115In (KED) | 113.959 %             | 1,089,302 cps     |               |
| 133Cs (KED) | 0.033 ppb             | 1,290 cps         |               |
| 138Ba (KED) | 2.570 ppb             | 126,324 cps       |               |
| 139La (KED) | 0.142 ppb             | 14,218 cps        |               |
| 140Ce (KED) | 0.414 ppb             | 53,474 cps        |               |
| 141Pr (KED) | 0.037 ppb             | 5,031 cps         |               |
| 142Nd (KED) | 0.228 ppb             | 12,156 cps        |               |
| 152Sm (KED) | 0.027 ppb             | 1,290 cps         |               |
| 153Eu (KED) | 0.006 ppb             | 547 cps           |               |
| 158Gd (KED) | 0.021 ppb             | 1,283 cps         |               |
| 159Tb (KED) | 114.680 %             | 5,010,790 cps     |               |
| 164Dy (KED) | 0.018 ppb             | 1,277 cps         |               |
| 166Er (KED) | 0.009 ppb             | 1,247 cps         |               |
| 169Tm (KED) | 0.001 ppb             | 303 cps           |               |
| 174Yb (KED) | 0.006 ppb             | 610 cps           |               |
| 175Lu (KED) | -0.011 ppb            | 19,970 cps        |               |
| 205Tl (KED) | 0.003 ppb             | 637 cps           |               |
| 208Pb (KED) | 0.312 ppb             | 43,673 cps        |               |
| 209Bi (KED) | 103.134 %             | 3,832,904 cps     |               |
| 232Th (KED) | 0.039 ppb             | 9,967 cps         |               |
| 238U (KED)  | 0.010 ppb             | 2,847 cps         |               |



| Category    | Concentration average | Intensity average | Intensity RSD |
|-------------|-----------------------|-------------------|---------------|
| 45Sc (KED)  | 107.943 %             | 67,157 cps        |               |
| 51V (KED)   | 0.094 ppb             | 900 cps           |               |
| 52Cr (KED)  | 0.507 ppb             | 7,799 cps         |               |
| 55Mn (KED)  | 2.070 ppb             | 17,095 cps        |               |
| 56Fe (KED)  | 69.879 ppb            | 972,060 cps       |               |
| 58Ni (KED)  | 0.594 ppb             | 10,188 cps        |               |
| 59Co (KED)  | 0.049 ppb             | 1,393 cps         |               |
| 63Cu (KED)  | 2.167 ppb             | 45,125 cps        |               |
| 64Zn (KED)  | 62.007 ppb            | 395,523 cps       |               |
| 69Ga (KED)  | 0.390 ppb             | 3,074 cps         |               |
| 75As (KED)  | 0.045 ppb             | 97 cps            |               |
| 80Se (KED)  | 0.607 ppb             | 2,870 cps         |               |
| 85Rb (KED)  | 0.821 ppb             | 5,885 cps         |               |
| 88Sr (KED)  | 1.789 ppb             | 18,457 cps        |               |
| 89Y (KED)   | 103.984 %             | 564,938 cps       |               |
| 107Ag (KED) | 0.025 ppb             | 1,317 cps         |               |
| 114Cd (KED) | 0.008 ppb             | 240 cps           |               |
| 115In (KED) | 102.678 %             | 981,472 cps       |               |
| 133Cs (KED) | 0.014 ppb             | 500 cps           |               |
| 138Ba (KED) | 1.343 ppb             | 63,394 cps        |               |
| 139La (KED) | 0.058 ppb             | 5,535 cps         |               |
| 140Ce (KED) | 0.277 ppb             | 34,103 cps        |               |
| 141Pr (KED) | 0.015 ppb             | 1,930 cps         |               |
| 142Nd (KED) | 0.127 ppb             | 6,452 cps         |               |
| 152Sm (KED) | 0.012 ppb             | 517 cps           |               |
| 153Eu (KED) | 0.002 ppb             | 223 cps           |               |
| 158Gd (KED) | 0.009 ppb             | 517 cps           |               |
| 159Tb (KED) | 109.209 %             | 4,771,728 cps     |               |
| 164Dy (KED) | 0.006 ppb             | 427 cps           |               |
| 166Er (KED) | 0.006 ppb             | 943 cps           |               |
| 169Tm (KED) | 0.000 ppb             | 117 cps           |               |
| 174Yb (KED) | 0.003 ppb             | 257 cps           |               |
| 175Lu (KED) | -0.021 ppb            | 17,322 cps        |               |
| 205Tl (KED) | 0.001 ppb             | 263 cps           |               |
| 208Pb (KED) | 0.166 ppb             | 24,290 cps        |               |
| 209Bi (KED) | 96.667 %              | 3,592,584 cps     |               |
| 232Th (KED) | 0.016 ppb             | 3,877 cps         |               |
| 238U (KED)  | 0.005 ppb             | 1,393 cps         |               |



| Category    | Concentration average | Intensity average | Intensity RSD |
|-------------|-----------------------|-------------------|---------------|
| 45Sc (KED)  | 118.510 %             | 73,731 cps        |               |
| 51V (KED)   | 0.126 ppb             | 1,317 cps         |               |
| 52Cr (KED)  | 0.572 ppb             | 9,624 cps         |               |
| 55Mn (KED)  | 2.612 ppb             | 23,636 cps        |               |
| 56Fe (KED)  | 89.650 ppb            | 1,368,134 cps     |               |
| 58Ni (KED)  | 0.733 ppb             | 13,744 cps        |               |
| 59Co (KED)  | 0.063 ppb             | 1,967 cps         |               |
| 63Cu (KED)  | 2.555 ppb             | 57,141 cps        |               |
| 64Zn (KED)  | 62.244 ppb            | 426,913 cps       |               |
| 69Ga (KED)  | 0.430 ppb             | 3,641 cps         |               |
| 75As (KED)  | 0.060 ppb             | 133 cps           |               |
| 80Se (KED)  | 0.306 ppb             | 2,887 cps         |               |
| 85Rb (KED)  | 0.945 ppb             | 7,282 cps         |               |
| 88Sr (KED)  | 2.272 ppb             | 25,182 cps        |               |
| 89Y (KED)   | 111.811 %             | 607,464 cps       |               |
| 107Ag (KED) | 0.021 ppb             | 1,227 cps         |               |
| 114Cd (KED) | 0.010 ppb             | 297 cps           |               |
| 115In (KED) | 110.935 %             | 1,060,394 cps     |               |
| 133Cs (KED) | 0.016 ppb             | 623 cps           |               |
| 138Ba (KED) | 1.499 ppb             | 74,634 cps        |               |
| 139La (KED) | 0.083 ppb             | 8,406 cps         |               |
| 140Ce (KED) | 0.254 ppb             | 33,074 cps        |               |
| 141Pr (KED) | 0.019 ppb             | 2,617 cps         |               |
| 142Nd (KED) | 0.133 ppb             | 7,169 cps         |               |
| 152Sm (KED) | 0.012 ppb             | 557 cps           |               |
| 153Eu (KED) | 0.002 ppb             | 207 cps           |               |
| 158Gd (KED) | 0.012 ppb             | 727 cps           |               |
| 159Tb (KED) | 115.391 %             | 5,041,821 cps     |               |
| 164Dy (KED) | 0.007 ppb             | 523 cps           |               |
| 166Er (KED) | 0.004 ppb             | 797 cps           |               |
| 169Tm (KED) | 0.000 ppb             | 153 cps           |               |
| 174Yb (KED) | 0.003 ppb             | 300 cps           |               |
| 175Lu (KED) | -0.016 ppb            | 19,208 cps        |               |
| 205Tl (KED) | 0.002 ppb             | 433 cps           |               |
| 208Pb (KED) | 0.336 ppb             | 46,357 cps        |               |
| 209Bi (KED) | 102.700 %             | 3,816,797 cps     |               |
| 232Th (KED) | 0.020 ppb             | 5,054 cps         |               |
| 238U (KED)  | 0.006 ppb             | 1,587 cps         |               |



| Category    | Concentration average | Intensity average | Intensity RSD |
|-------------|-----------------------|-------------------|---------------|
| 45Sc (KED)  | 114.020 %             | 70,938 cps        |               |
| 51V (KED)   | 0.208 ppb             | 2,094 cps         |               |
| 52Cr (KED)  | 1.079 ppb             | 17,239 cps        |               |
| 55Mn (KED)  | 4.402 ppb             | 38,205 cps        |               |
| 56Fe (KED)  | 136.315 ppb           | 1,999,663 cps     |               |
| 58Ni (KED)  | 0.830 ppb             | 14,932 cps        |               |
| 59Co (KED)  | 0.070 ppb             | 2,087 cps         |               |
| 63Cu (KED)  | 1.930 ppb             | 41,114 cps        |               |
| 64Zn (KED)  | 68.543 ppb            | 446,725 cps       |               |
| 69Ga (KED)  | 0.675 ppb             | 5,421 cps         |               |
| 75As (KED)  | 0.098 ppb             | 197 cps           |               |
| 80Se (KED)  | 0.512 ppb             | 2,874 cps         |               |
| 85Rb (KED)  | 1.142 ppb             | 8,366 cps         |               |
| 88Sr (KED)  | 3.341 ppb             | 35,150 cps        |               |
| 89Y (KED)   | 106.267 %             | 577,342 cps       |               |
| 107Ag (KED) | 0.020 ppb             | 1,137 cps         |               |
| 114Cd (KED) | 0.014 ppb             | 373 cps           |               |
| 115In (KED) | 107.721 %             | 1,029,670 cps     |               |
| 133Cs (KED) | 0.023 ppb             | 857 cps           |               |
| 138Ba (KED) | 2.222 ppb             | 108,115 cps       |               |
| 139La (KED) | 0.119 ppb             | 11,809 cps        |               |
| 140Ce (KED) | 0.244 ppb             | 31,212 cps        |               |
| 141Pr (KED) | 0.029 ppb             | 3,914 cps         |               |
| 142Nd (KED) | 0.151 ppb             | 7,959 cps         |               |
| 152Sm (KED) | 0.021 ppb             | 980 cps           |               |
| 153Eu (KED) | 0.005 ppb             | 483 cps           |               |
| 158Gd (KED) | 0.017 ppb             | 1,070 cps         |               |
| 159Tb (KED) | 113.337 %             | 4,952,089 cps     |               |
| 164Dy (KED) | 0.013 ppb             | 950 cps           |               |
| 166Er (KED) | 0.004 ppb             | 783 cps           |               |
| 169Tm (KED) | 0.001 ppb             | 433 cps           |               |
| 174Yb (KED) | 0.005 ppb             | 513 cps           |               |
| 175Lu (KED) | -0.011 ppb            | 19,823 cps        |               |
| 205Tl (KED) | 0.003 ppb             | 537 cps           |               |
| 208Pb (KED) | 0.290 ppb             | 39,877 cps        |               |
| 209Bi (KED) | 100.443 %             | 3,732,917 cps     |               |
| 232Th (KED) | 0.031 ppb             | 7,786 cps         |               |
| 238U (KED)  | 0.008 ppb             | 2,270 cps         |               |



| Category    | Concentration average | Intensity average | Intensity RSD |
|-------------|-----------------------|-------------------|---------------|
| 45Sc (KED)  | 120.310 %             | 74,850 cps        |               |
| 51V (KED)   | 0.147 ppb             | 1,567 cps         |               |
| 52Cr (KED)  | 0.469 ppb             | 8,053 cps         |               |
| 55Mn (KED)  | 3.197 ppb             | 29,324 cps        |               |
| 56Fe (KED)  | 88.177 ppb            | 1,366,163 cps     |               |
| 58Ni (KED)  | 0.752 ppb             | 14,302 cps        |               |
| 59Co (KED)  | 0.056 ppb             | 1,767 cps         |               |
| 63Cu (KED)  | 2.606 ppb             | 57,365 cps        |               |
| 64Zn (KED)  | 69.165 ppb            | 466,797 cps       |               |
| 69Ga (KED)  | 0.495 ppb             | 4,124 cps         |               |
| 75As (KED)  | 0.072 ppb             | 153 cps           |               |
| 80Se (KED)  | 0.100 ppb             | 2,707 cps         |               |
| 85Rb (KED)  | 1.111 ppb             | 8,430 cps         |               |
| 88Sr (KED)  | 2.842 ppb             | 30,975 cps        |               |
| 89Y (KED)   | 110.045 %             | 597,870 cps       |               |
| 107Ag (KED) | 0.021 ppb             | 1,213 cps         |               |
| 114Cd (KED) | 0.036 ppb             | 887 cps           |               |
| 115In (KED) | 110.948 %             | 1,060,520 cps     |               |
| 133Cs (KED) | 0.016 ppb             | 617 cps           |               |
| 138Ba (KED) | 1.641 ppb             | 79,990 cps        |               |
| 139La (KED) | 0.081 ppb             | 8,033 cps         |               |
| 140Ce (KED) | 0.162 ppb             | 20,757 cps        |               |
| 141Pr (KED) | 0.021 ppb             | 2,750 cps         |               |
| 142Nd (KED) | 0.101 ppb             | 5,304 cps         |               |
| 152Sm (KED) | 0.015 ppb             | 700 cps           |               |
| 153Eu (KED) | 0.003 ppb             | 283 cps           |               |
| 158Gd (KED) | 0.012 ppb             | 717 cps           |               |
| 159Tb (KED) | 113.122 %             | 4,942,679 cps     |               |
| 164Dy (KED) | 0.009 ppb             | 640 cps           |               |
| 166Er (KED) | 0.002 ppb             | 630 cps           |               |
| 169Tm (KED) | 0.001 ppb             | 223 cps           |               |
| 174Yb (KED) | 0.004 ppb             | 383 cps           |               |
| 175Lu (KED) | -0.013 ppb            | 19,295 cps        |               |
| 205Tl (KED) | 0.002 ppb             | 437 cps           |               |
| 208Pb (KED) | 0.400 ppb             | 55,075 cps        |               |
| 209Bi (KED) | 104.643 %             | 3,888,984 cps     |               |
| 232Th (KED) | 0.020 ppb             | 5,288 cps         |               |
| 238U (KED)  | 0.006 ppb             | 1,773 cps         |               |











| Category    | Concentration average | Intensity average | Intensity RSD |
|-------------|-----------------------|-------------------|---------------|
| 45Sc (KED)  | 119.722 %             | 74,485 cps        |               |
| 51V (KED)   | 0.240 ppb             | 2,540 cps         |               |
| 52Cr (KED)  | 0.503 ppb             | 8,583 cps         |               |
| 55Mn (KED)  | 4.319 ppb             | 39,359 cps        |               |
| 56Fe (KED)  | 145.344 ppb           | 2,238,501 cps     |               |
| 58Ni (KED)  | 1.033 ppb             | 19,442 cps        |               |
| 59Co (KED)  | 0.076 ppb             | 2,367 cps         |               |
| 63Cu (KED)  | 2.801 ppb             | 63,290 cps        |               |
| 64Zn (KED)  | 61.941 ppb            | 429,477 cps       |               |
| 69Ga (KED)  | 0.629 ppb             | 5,371 cps         |               |
| 75As (KED)  | 0.058 ppb             | 130 cps           |               |
| 80Se (KED)  | 0.219 ppb             | 2,860 cps         |               |
| 85Rb (KED)  | 1.282 ppb             | 9,981 cps         |               |
| 88Sr (KED)  | 3.783 ppb             | 42,318 cps        |               |
| 89Y (KED)   | 113.031 %             | 614,095 cps       |               |
| 107Ag (KED) | 0.033 ppb             | 1,873 cps         |               |
| 114Cd (KED) | 0.009 ppb             | 277 cps           |               |
| 115In (KED) | 111.061 %             | 1,061,600 cps     |               |
| 133Cs (KED) | 0.023 ppb             | 880 cps           |               |
| 138Ba (KED) | 2.161 ppb             | 108,801 cps       |               |
| 139La (KED) | 0.141 ppb             | 14,385 cps        |               |
| 140Ce (KED) | 0.276 ppb             | 36,570 cps        |               |
| 141Pr (KED) | 0.032 ppb             | 4,457 cps         |               |
| 142Nd (KED) | 0.180 ppb             | 9,844 cps         |               |
| 152Sm (KED) | 0.027 ppb             | 1,297 cps         |               |
| 153Eu (KED) | 0.004 ppb             | 420 cps           |               |
| 158Gd (KED) | 0.020 ppb             | 1,237 cps         |               |
| 159Tb (KED) | 117.232 %             | 5,122,255 cps     |               |
| 164Dy (KED) | 0.012 ppb             | 877 cps           |               |
| 166Er (KED) | 0.003 ppb             | 713 cps           |               |
| 169Tm (KED) | 0.001 ppb             | 203 cps           |               |
| 174Yb (KED) | 0.005 ppb             | 520 cps           |               |
| 175Lu (KED) | -0.015 ppb            | 19,659 cps        |               |
| 205Tl (KED) | 0.003 ppb             | 520 cps           |               |
| 208Pb (KED) | 0.297 ppb             | 42,918 cps        |               |
| 209Bi (KED) | 105.904 %             | 3,935,838 cps     |               |
| 232Th (KED) | 0.032 ppb             | 8,423 cps         |               |
| 238U (KED)  | 0.009 ppb             | 2,604 cps         |               |











| Category    | Concentration average | Intensity average | Intensity RSD |
|-------------|-----------------------|-------------------|---------------|
| 45Sc (KED)  | 124.013 %             | 77,154 cps        |               |
| 51V (KED)   | 0.120 ppb             | 1,320 cps         |               |
| 52Cr (KED)  | 0.410 ppb             | 7,299 cps         |               |
| 55Mn (KED)  | 2.335 ppb             | 22,126 cps        |               |
| 56Fe (KED)  | 79.026 ppb            | 1,262,452 cps     |               |
| 58Ni (KED)  | 0.707 ppb             | 13,884 cps        |               |
| 59Co (KED)  | 0.059 ppb             | 1,923 cps         |               |
| 63Cu (KED)  | 2.109 ppb             | 48,916 cps        |               |
| 64Zn (KED)  | 54.463 ppb            | 386,997 cps       |               |
| 69Ga (KED)  | 0.419 ppb             | 3,681 cps         |               |
| 75As (KED)  | 0.056 ppb             | 130 cps           |               |
| 80Se (KED)  | 0.267 ppb             | 2,964 cps         |               |
| 85Rb (KED)  | 0.634 ppb             | 5,071 cps         |               |
| 88Sr (KED)  | 3.035 ppb             | 34,805 cps        |               |
| 89Y (KED)   | 115.802 %             | 629,147 cps       |               |
| 107Ag (KED) | 0.028 ppb             | 1,663 cps         |               |
| 114Cd (KED) | 0.007 ppb             | 250 cps           |               |
| 115In (KED) | 115.723 %             | 1,106,161 cps     |               |
| 133Cs (KED) | 0.014 ppb             | 567 cps           |               |
| 138Ba (KED) | 1.519 ppb             | 75,494 cps        |               |
| 139La (KED) | 0.072 ppb             | 7,249 cps         |               |
| 140Ce (KED) | 0.139 ppb             | 18,160 cps        |               |
| 141Pr (KED) | 0.017 ppb             | 2,354 cps         |               |
| 142Nd (KED) | 0.090 ppb             | 4,821 cps         |               |
| 152Sm (KED) | 0.012 ppb             | 547 cps           |               |
| 153Eu (KED) | 0.003 ppb             | 257 cps           |               |
| 158Gd (KED) | 0.009 ppb             | 560 cps           |               |
| 159Tb (KED) | 115.225 %             | 5,034,595 cps     |               |
| 164Dy (KED) | 0.006 ppb             | 470 cps           |               |
| 166Er (KED) | 0.000 ppb             | 477 cps           |               |
| 169Tm (KED) | 0.000 ppb             | 147 cps           |               |
| 174Yb (KED) | 0.003 ppb             | 257 cps           |               |
| 175Lu (KED) | -0.013 ppb            | 19,739 cps        |               |
| 205Tl (KED) | 0.002 ppb             | 347 cps           |               |
| 208Pb (KED) | 0.311 ppb             | 44,546 cps        |               |
| 209Bi (KED) | 105.534 %             | 3,922,098 cps     |               |
| 232Th (KED) | 0.017 ppb             | 4,354 cps         |               |
| 238U (KED)  | 0.006 ppb             | 1,707 cps         |               |

## Sample Summary

Instrument ID: iCAP Q

Analysis index: 30

Analysis name: 191091ti

Analysis started at: 10/14/2021 4:37:54 PM

User name: WINDOWS-UPCI4ER\Administrator

| Category    | Concentration average | Concentration RSD |
|-------------|-----------------------|-------------------|
| 6Li (KED)   | 111.552 %             |                   |
| 9Be (KED)   | 0.017 ppb             |                   |
| 11B (KED)   | -11.550 ppb           |                   |
| 24Mg (KED)  | 203.240 ppb           |                   |
| 27Al (KED)  | 109.220 ppb           |                   |
| 45Sc (KED)  | 124.234 %             |                   |
| 51V (KED)   | 0.222 ppb             |                   |
| 52Cr (KED)  | 0.423 ppb             |                   |
| 55Mn (KED)  | 4.090 ppb             |                   |
| 56Fe (KED)  | 141.172 ppb           |                   |
| 58Ni (KED)  | 0.887 ppb             |                   |
| 59Co (KED)  | 0.068 ppb             |                   |
| 63Cu (KED)  | 2.669 ppb             |                   |
| 64Zn (KED)  | 62.813 ppb            |                   |
| 69Ga (KED)  | 0.528 ppb             |                   |
| 75As (KED)  | 0.077 ppb             |                   |
| 80Se (KED)  | 0.382 ppb             |                   |
| 85Rb (KED)  | 1.712 ppb             |                   |
| 88Sr (KED)  | 3.936 ppb             |                   |
| 89Y (KED)   | 114.079 %             |                   |
| 107Ag (KED) | 0.013 ppb             |                   |
| 114Cd (KED) | 0.007 ppb             |                   |
| 115In (KED) | 114.788 %             |                   |
| 133Cs (KED) | 0.022 ppb             |                   |
| 138Ba (KED) | 1.941 ppb             |                   |
| 139La (KED) | 0.121 ppb             |                   |
| 140Ce (KED) | 0.236 ppb             |                   |
| 141Pr (KED) | 0.027 ppb             |                   |
| 142Nd (KED) | 0.152 ppb             |                   |
| 152Sm (KED) | 0.021 ppb             |                   |
| 153Eu (KED) | 0.003 ppb             |                   |
| 158Gd (KED) | 0.018 ppb             |                   |
| 159Tb (KED) | 114.483 %             |                   |
| 164Dy (KED) | 0.012 ppb             |                   |
| 166Er (KED) | 0.002 ppb             |                   |
| 169Tm (KED) | 0.001 ppb             |                   |
| 174Yb (KED) | 0.004 ppb             |                   |
| 175Lu (KED) | -0.020 ppb            |                   |
| 205Tl (KED) | 0.003 ppb             |                   |
| 208Pb (KED) | 0.299 ppb             |                   |
| 209Bi (KED) | 101.953 %             |                   |
| 232Th (KED) | 0.031 ppb             |                   |
| 238U (KED)  | 0.008 ppb             |                   |

| Category   | Concentration average | Intensity average | Intensity RSD |
|------------|-----------------------|-------------------|---------------|
| 6Li (KED)  | 111.552 %             | 3,767 cps         |               |
| 9Be (KED)  | 0.017 ppb             | 3 cps             |               |
| 11B (KED)  | -11.550 ppb           | 263 cps           |               |
| 24Mg (KED) | 203.240 ppb           | 157,569 cps       |               |
| 27Al (KED) | 109.220 ppb           | 24,023 cps        |               |

| Category    | Concentration average | Intensity average | Intensity RSD |
|-------------|-----------------------|-------------------|---------------|
| 45Sc (KED)  | 124.234 %             | 77,292 cps        |               |
| 51V (KED)   | 0.222 ppb             | 2,434 cps         |               |
| 52Cr (KED)  | 0.423 ppb             | 7,536 cps         |               |
| 55Mn (KED)  | 4.090 ppb             | 38,693 cps        |               |
| 56Fe (KED)  | 141.172 ppb           | 2,256,285 cps     |               |
| 58Ni (KED)  | 0.887 ppb             | 17,372 cps        |               |
| 59Co (KED)  | 0.068 ppb             | 2,217 cps         |               |
| 63Cu (KED)  | 2.669 ppb             | 60,888 cps        |               |
| 64Zn (KED)  | 62.813 ppb            | 439,552 cps       |               |
| 69Ga (KED)  | 0.528 ppb             | 4,554 cps         |               |
| 75As (KED)  | 0.077 ppb             | 170 cps           |               |
| 80Se (KED)  | 0.382 ppb             | 2,997 cps         |               |
| 85Rb (KED)  | 1.712 ppb             | 13,454 cps        |               |
| 88Sr (KED)  | 3.936 ppb             | 44,436 cps        |               |
| 89Y (KED)   | 114.079 %             | 619,785 cps       |               |
| 107Ag (KED) | 0.013 ppb             | 810 cps           |               |
| 114Cd (KED) | 0.007 ppb             | 233 cps           |               |
| 115In (KED) | 114.788 %             | 1,097,230 cps     |               |
| 133Cs (KED) | 0.022 ppb             | 877 cps           |               |
| 138Ba (KED) | 1.941 ppb             | 95,514 cps        |               |
| 139La (KED) | 0.121 ppb             | 12,103 cps        |               |
| 140Ce (KED) | 0.236 ppb             | 30,564 cps        |               |
| 141Pr (KED) | 0.027 ppb             | 3,571 cps         |               |
| 142Nd (KED) | 0.152 ppb             | 8,103 cps         |               |
| 152Sm (KED) | 0.021 ppb             | 967 cps           |               |
| 153Eu (KED) | 0.003 ppb             | 327 cps           |               |
| 158Gd (KED) | 0.018 ppb             | 1,123 cps         |               |
| 159Tb (KED) | 114.483 %             | 5,002,164 cps     |               |
| 164Dy (KED) | 0.012 ppb             | 897 cps           |               |
| 166Er (KED) | 0.002 ppb             | 657 cps           |               |
| 169Tm (KED) | 0.001 ppb             | 243 cps           |               |
| 174Yb (KED) | 0.004 ppb             | 397 cps           |               |
| 175Lu (KED) | -0.020 ppb            | 18,330 cps        |               |
| 205Tl (KED) | 0.003 ppb             | 523 cps           |               |
| 208Pb (KED) | 0.299 ppb             | 41,543 cps        |               |
| 209Bi (KED) | 101.953 %             | 3,789,010 cps     |               |
| 232Th (KED) | 0.031 ppb             | 7,862 cps         |               |
| 238U (KED)  | 0.008 ppb             | 2,387 cps         |               |
