# Supplementary material for: Geographic and breed-specific traceability of cashmere via mineral element profiling in Inner Mongolia (Ordos, Chifeng, and Alxa League)
Source: Royal Society of Chemistry journal article supplement (doi:10.1039/d5ra08122j), 2026-01-01
Supplement: d5ra08122j1.zip [file 20211014-min gai (1-24).pdf › ԭʼ޿/20211014-min gai (1-24).pdf]

## Instrument Summary:

Instrument ID: iCAP Q  
Serial Number: Undefined

## Labbook Summary:

Path and filename: \_Application Data\Workspace\LabBooks\wlw\20211014-1.imexp  
Labbook created by: Administrator  
Based on template:  
Hardware configuration: iCAPQ1  
Labbook type: eQuant  
Qtegra version (last saved): 2.7.2425.154  
Labbook started: 10/14/2021 11:11:39 AM  
Labbook finished: 10/14/2021 1:09:36 PM

## Method Summary:

| Isotope     | Mode | Dwell time (s) | # of Channels | Spacing | Resolution | IS          |
|-------------|------|----------------|---------------|---------|------------|-------------|
| 6Li (KED)   | KED  | 0.03           | 3             | 0.1     | Normal     |             |
| 9Be (KED)   | KED  | 0.03           | 3             | 0.1     | Normal     | 6Li (KED)   |
| 11B (KED)   | KED  | 0.03           | 3             | 0.1     | Normal     | 6Li (KED)   |
| 24Mg (KED)  | KED  | 0.03           | 3             | 0.1     | Normal     | 6Li (KED)   |
| 27Al (KED)  | KED  | 0.03           | 3             | 0.1     | Normal     | 45Sc (KED)  |
| 45Sc (KED)  | KED  | 0.03           | 3             | 0.1     | Normal     |             |
| 51V (KED)   | KED  | 0.03           | 3             | 0.1     | Normal     | 45Sc (KED)  |
| 52Cr (KED)  | KED  | 0.03           | 3             | 0.1     | Normal     | 45Sc (KED)  |
| 55Mn (KED)  | KED  | 0.03           | 3             | 0.1     | Normal     | 45Sc (KED)  |
| 56Fe (KED)  | KED  | 0.03           | 3             | 0.1     | Normal     | 45Sc (KED)  |
| 58Ni (KED)  | KED  | 0.03           | 3             | 0.1     | Normal     | 45Sc (KED)  |
| 59Co (KED)  | KED  | 0.03           | 3             | 0.1     | Normal     | 45Sc (KED)  |
| 63Cu (KED)  | KED  | 0.03           | 3             | 0.1     | Normal     | 89Y (KED)   |
| 64Zn (KED)  | KED  | 0.03           | 3             | 0.1     | Normal     | 89Y (KED)   |
| 69Ga (KED)  | KED  | 0.03           | 3             | 0.1     | Normal     | 89Y (KED)   |
| 75As (KED)  | KED  | 0.03           | 3             | 0.1     | Normal     | 89Y (KED)   |
| 80Se (KED)  | KED  | 0.03           | 3             | 0.1     | Normal     | 89Y (KED)   |
| 85Rb (KED)  | KED  | 0.03           | 3             | 0.1     | Normal     | 89Y (KED)   |
| 88Sr (KED)  | KED  | 0.03           | 3             | 0.1     | Normal     | 89Y (KED)   |
| 89Y (KED)   | KED  | 0.03           | 3             | 0.1     | Normal     |             |
| 107Ag (KED) | KED  | 0.03           | 3             | 0.1     | Normal     | 115In (KED) |
| 114Cd (KED) | KED  | 0.03           | 3             | 0.1     | Normal     | 115In (KED) |
| 115In (KED) | KED  | 0.03           | 3             | 0.1     | Normal     |             |
| 133Cs (KED) | KED  | 0.03           | 3             | 0.1     | Normal     | 115In (KED) |
| 138Ba (KED) | KED  | 0.03           | 3             | 0.1     | Normal     | 159Tb (KED) |
| 139La (KED) | KED  | 0.03           | 3             | 0.1     | Normal     | 159Tb (KED) |
| 140Ce (KED) | KED  | 0.03           | 3             | 0.1     | Normal     | 159Tb (KED) |
| 141Pr (KED) | KED  | 0.03           | 3             | 0.1     | Normal     | 159Tb (KED) |
| 142Nd (KED) | KED  | 0.03           | 3             | 0.1     | Normal     | 159Tb (KED) |
| 152Sm (KED) | KED  | 0.03           | 3             | 0.1     | Normal     | 159Tb (KED) |
| 153Eu (KED) | KED  | 0.03           | 3             | 0.1     | Normal     | 159Tb (KED) |
| 158Gd (KED) | KED  | 0.03           | 3             | 0.1     | Normal     | 159Tb (KED) |
| 159Tb (KED) | KED  | 0.03           | 3             | 0.1     | Normal     |             |
| 164Dy (KED) | KED  | 0.03           | 3             | 0.1     | Normal     | 159Tb (KED) |
| 166Er (KED) | KED  | 0.03           | 3             | 0.1     | Normal     | 159Tb (KED) |
| 169Tm (KED) | KED  | 0.03           | 3             | 0.1     | Normal     | 159Tb (KED) |
| 174Yb (KED) | KED  | 0.03           | 3             | 0.1     | Normal     | 159Tb (KED) |
| 175Lu (KED) | KED  | 0.03           | 3             | 0.1     | Normal     | 159Tb (KED) |
| 205Tl (KED) | KED  | 0.03           | 3             | 0.1     | Normal     | 209Bi (KED) |
| 208Pb (KED) | KED  | 0.03           | 3             | 0.1     | Normal     | 209Bi (KED) |
| 209Bi (KED) | KED  | 0.03           | 3             | 0.1     | Normal     |             |
| 232Th (KED) | KED  | 0.03           | 3             | 0.1     | Normal     | 209Bi (KED) |
| 238U (KED)  | KED  | 0.03           | 3             | 0.1     | Normal     | 209Bi (KED) |

| Isotope     | Mode | Dwell time (s) | # of Channels | Spacing | Resolution |
|-------------|------|----------------|---------------|---------|------------|
| 6Li (KED)   | KED  | 0.03           | 3             | 0.1     | Normal     |
| 45Sc (KED)  | KED  | 0.03           | 3             | 0.1     | Normal     |
| 89Y (KED)   | KED  | 0.03           | 3             | 0.1     | Normal     |
| 115In (KED) | KED  | 0.03           | 3             | 0.1     | Normal     |
| 159Tb (KED) | KED  | 0.03           | 3             | 0.1     | Normal     |
| 209Bi (KED) | KED  | 0.03           | 3             | 0.1     | Normal     |

| No. of sweeps | Time per sweep[s] | Time per main run[s] |
|---------------|-------------------|----------------------|
| 10            | 3.87              | 38.7                 |

## Calibration Curves:

9Be (KED)

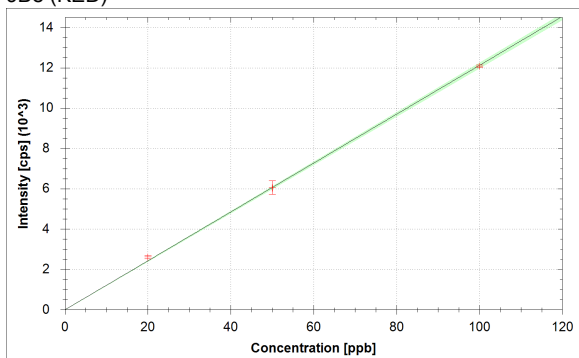

$$f(x) = 121.1720 \cdot x$$

$$R^2 = 0.9996$$

$$\text{BEC} = 0.000 \text{ ppb}$$

$$\text{LoD} = 0.0000 \text{ ppb}$$

11B (KED)

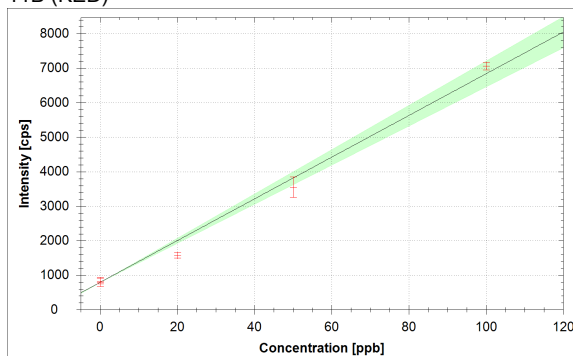

$$f(x) = 60.4272 \cdot x + 795.9020$$

$$R^2 = 0.9890$$

$$\text{BEC} = 13.171 \text{ ppb}$$

$$\text{LoD} = 3.9885 \text{ ppb}$$

24Mg (KED)

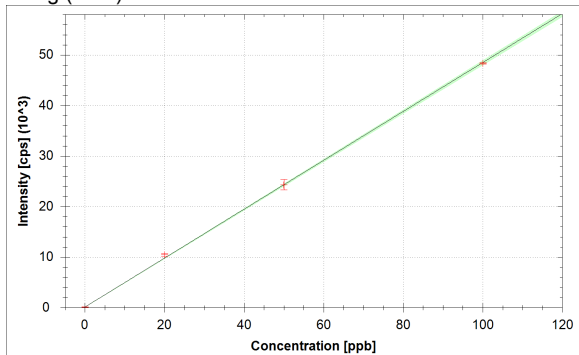

$$f(x) = 483.8091 \cdot x + 102.2734$$

$$R^2 = 0.9997$$

$$\text{BEC} = 0.211 \text{ ppb}$$

$$\text{LoD} = 0.1144 \text{ ppb}$$

27Al (KED)

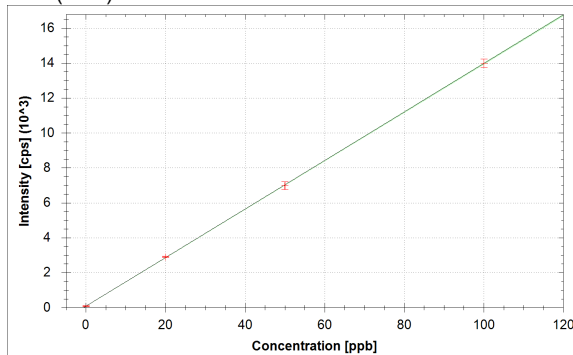

$$f(x) = 138.9295 \cdot x + 79.3969$$

$$R^2 = 1.0000$$

$$\text{BEC} = 0.571 \text{ ppb}$$

$$\text{LoD} = 0.2844 \text{ ppb}$$

51V (KED)

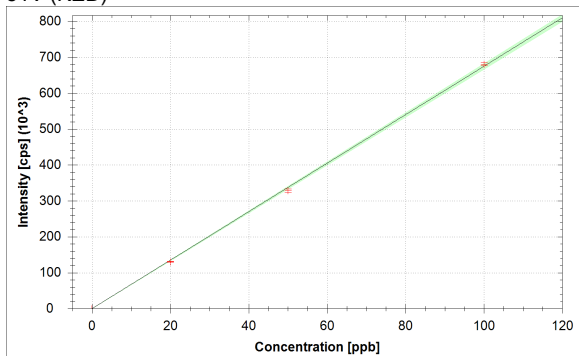

$$f(x) = 6749.5109 \cdot x + 2.1675$$

$$R^2 = 0.9996$$

$$\text{BEC} = 0.000 \text{ ppb}$$

$$\text{LoD} = 0.0009 \text{ ppb}$$

52Cr (KED)

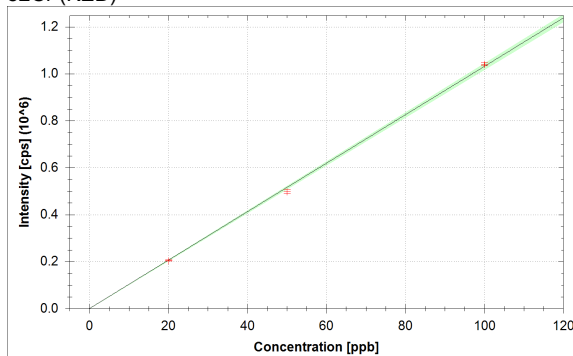

$$f(x) = 10312.6764 \cdot x + 134.6069$$

$$R^2 = 0.9995$$

$$\text{BEC} = 0.013 \text{ ppb}$$

$$\text{LoD} = 0.0070 \text{ ppb}$$

55Mn (KED)

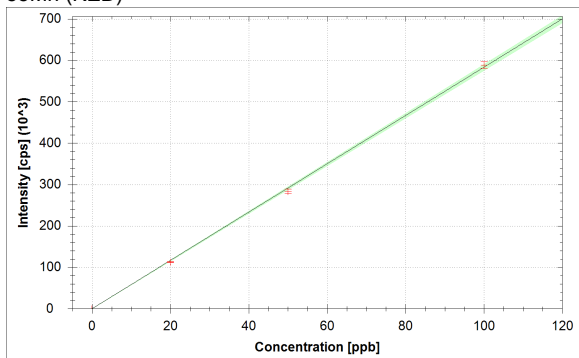

$$f(x) = 5831.7831 \cdot x + 133.9512$$

$$R^2 = 0.9995$$

$$\text{BEC} = 0.023 \text{ ppb}$$

$$\text{LoD} = 0.0117 \text{ ppb}$$

56Fe (KED)

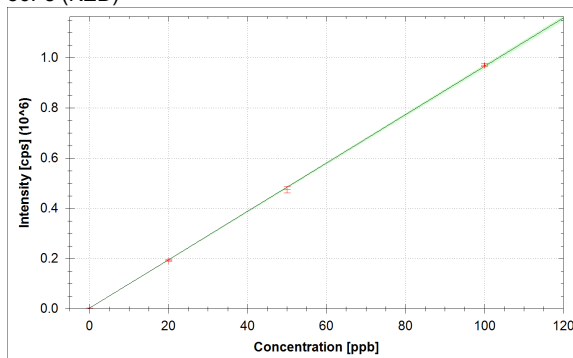

$$f(x) = 9629.5877 \cdot x + 2371.6139$$

$$R^2 = 0.9998$$

$$\text{BEC} = 0.246 \text{ ppb}$$

$$\text{LoD} = 0.0181 \text{ ppb}$$

58Ni (KED)

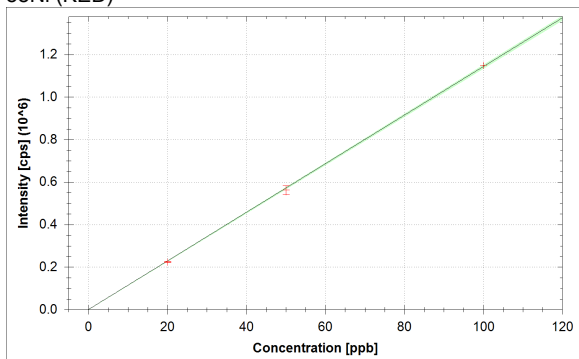

$$f(x) = 11430.2861 \cdot x + 250.0335$$

$$R^2 = 0.9998$$

$$\text{BEC} = 0.022 \text{ ppb}$$

$$\text{LoD} = 0.0034 \text{ ppb}$$

59Co (KED)

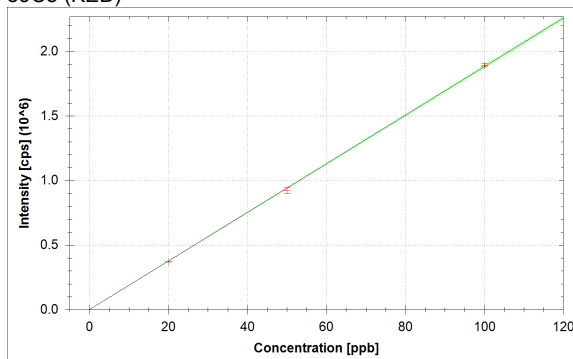

$$f(x) = 18812.9484 \cdot x + 33.7731$$

$$R^2 = 0.9998$$

$$\text{BEC} = 0.002 \text{ ppb}$$

$$\text{LoD} = 0.0010 \text{ ppb}$$

63Cu (KED)

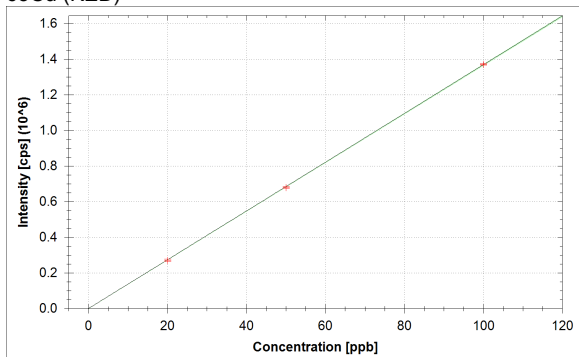

$$f(x) = 13680.1986 \cdot x + 353.3135$$

$$R^2 = 1.0000$$

$$\text{BEC} = 0.026 \text{ ppb}$$

$$\text{LoD} = 0.0114 \text{ ppb}$$

64Zn (KED)

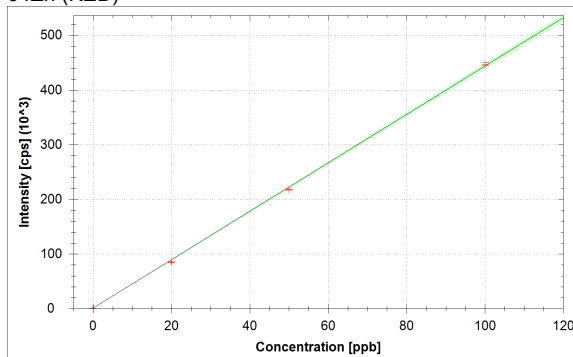

$$f(x) = 4431.7263 \cdot x + 801.3205$$

$$R^2 = 0.9996$$

$$\text{BEC} = 0.181 \text{ ppb}$$

$$\text{LoD} = 0.0527 \text{ ppb}$$

69Ga (KED)

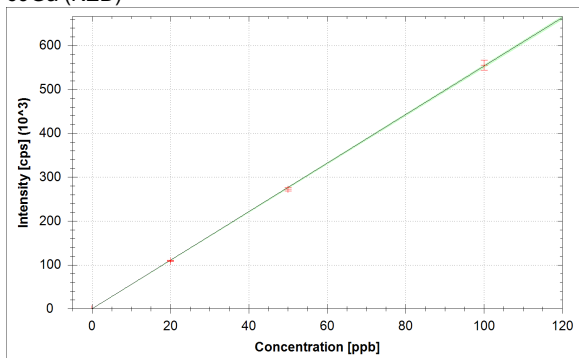

$$f(x) = 5530.3101 \cdot x + 34.7971$$

$$R^2 = 0.9999$$

$$\text{BEC} = 0.006 \text{ ppb}$$

$$\text{LoD} = 0.0116 \text{ ppb}$$

75As (KED)

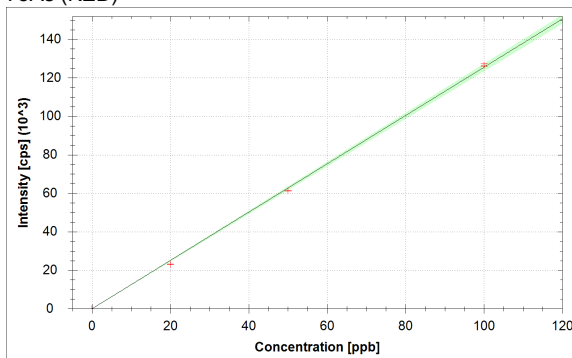

$$f(x) = 1254.5809 \cdot x + 10.8745$$

$$R^2 = 0.9994$$

$$\text{BEC} = 0.009 \text{ ppb}$$

$$\text{LoD} = 0.0043 \text{ ppb}$$

80Se (KED)

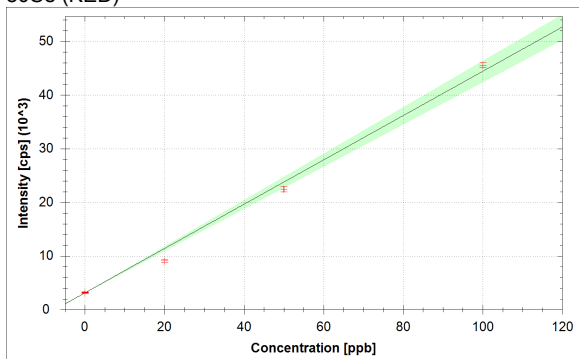

$$f(x) = 413.1028 \cdot x + 3116.2971$$

$$R^2 = 0.9935$$

$$\text{BEC} = 7.544 \text{ ppb}$$

$$\text{LoD} = 1.1119 \text{ ppb}$$

85Rb (KED)

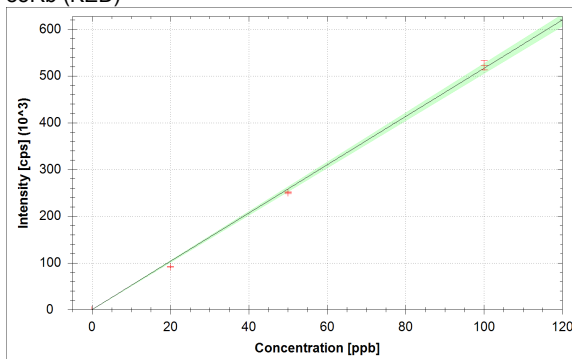

$$f(x) = 5162.8880 \cdot x + 23.9231$$

$$R^2 = 0.9987$$

$$\text{BEC} = 0.005 \text{ ppb}$$

$$\text{LoD} = 0.0044 \text{ ppb}$$

88Sr (KED)

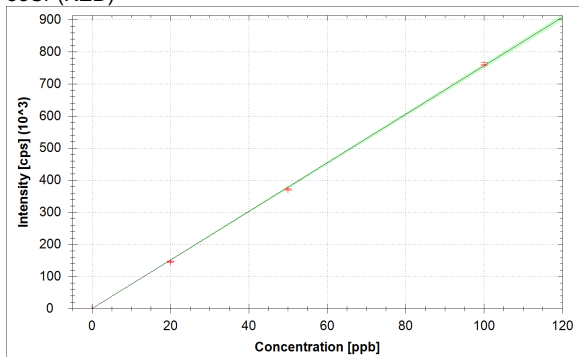

$$f(x) = 7564.1948 \cdot x + 71.7501$$

$$R^2 = 0.9997$$

$$\text{BEC} = 0.009 \text{ ppb}$$

$$\text{LoD} = 0.0052 \text{ ppb}$$

107Ag (KED)

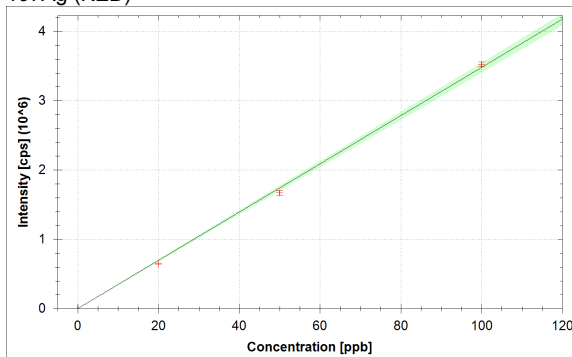

$$f(x) = 34788.7631 \cdot x + 27.6213$$

$$R^2 = 0.9989$$

$$\text{BEC} = 0.001 \text{ ppb}$$

$$\text{LoD} = 0.0013 \text{ ppb}$$

114Cd (KED)

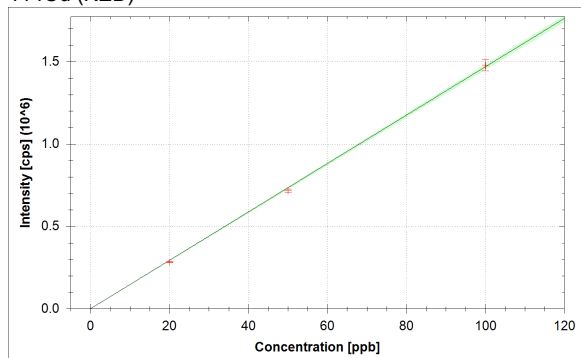

$$f(x) = 14683.5703 \cdot x + 45.1562$$

$$R^2 = 0.9997$$

$$\text{BEC} = 0.003 \text{ ppb}$$

$$\text{LoD} = 0.0024 \text{ ppb}$$

133Cs (KED)

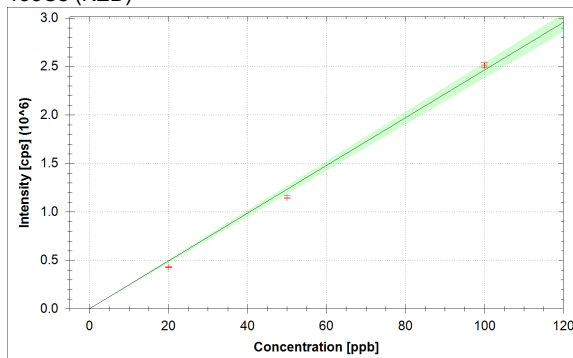

$$f(x) = 24624.8005 \cdot x + 19.8294$$

$$R^2 = 0.9971$$

$$\text{BEC} = 0.001 \text{ ppb}$$

$$\text{LoD} = 0.0018 \text{ ppb}$$

138Ba (KED)

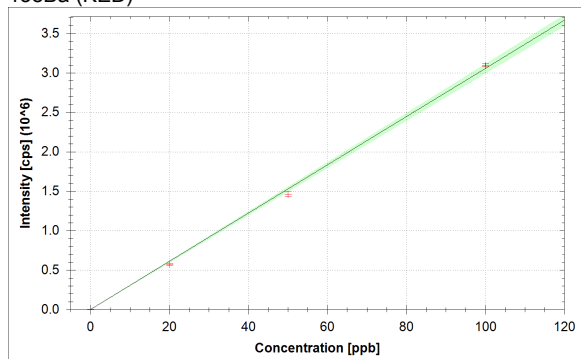

$$f(x) = 30555.2373 \cdot x + 679.3606$$

$$R^2 = 0.9989$$

$$\text{BEC} = 0.022 \text{ ppb}$$

$$\text{LoD} = 0.0268 \text{ ppb}$$

139La (KED)

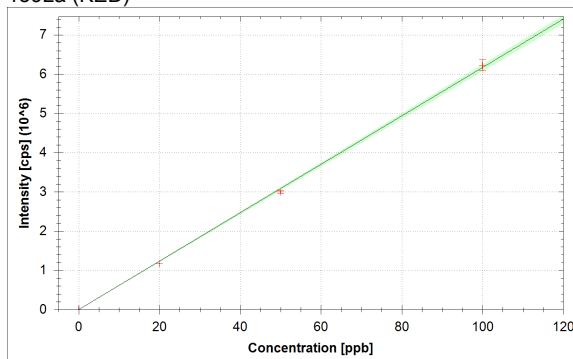

$$f(x) = 61699.5752 \cdot x + 18.7408$$

$$R^2 = 0.9995$$

$$\text{BEC} = 0.000 \text{ ppb}$$

$$\text{LoD} = 0.0001 \text{ ppb}$$

140Ce (KED)

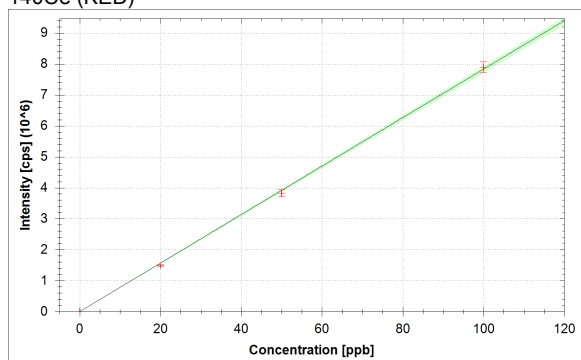

$$f(x) = 78310.9629 \cdot x + 100.2985$$

$$R^2 = 0.9996$$

$$\text{BEC} = 0.001 \text{ ppb}$$

$$\text{LoD} = 0.0004 \text{ ppb}$$

141Pr (KED)

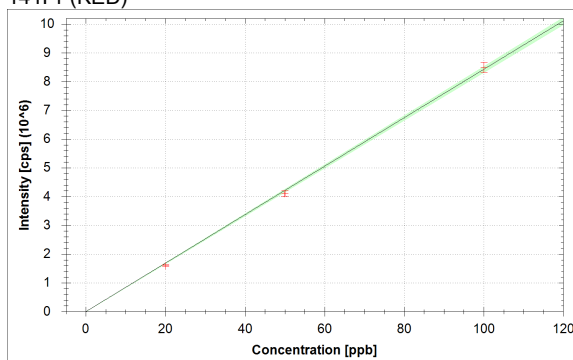

$$f(x) = 84252.9265 \cdot x + 3.3165$$

$$R^2 = 0.9995$$

$$\text{BEC} = 0.000 \text{ ppb}$$

$$\text{LoD} = 0.0005 \text{ ppb}$$

**<sup>142</sup>Nd (KED)**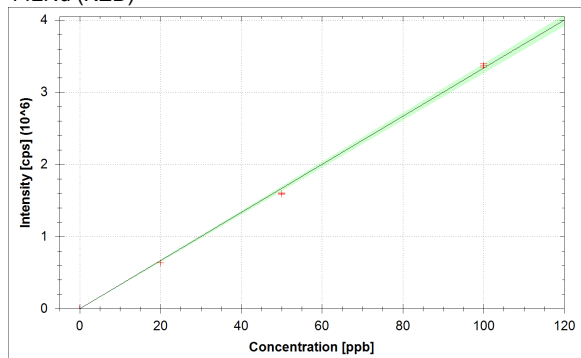

$$f(x) = 33332.8755 \cdot x + 16.5229$$

$$R^2 = 0.9990$$

$$\text{BEC} = 0.000 \text{ ppb}$$

$$\text{LoD} = 0.0003 \text{ ppb}$$

**<sup>152</sup>Sm (KED)**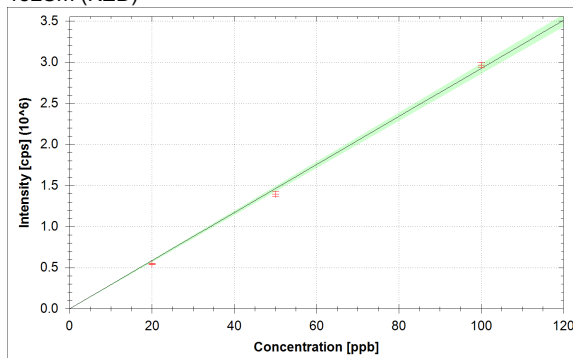

$$f(x) = 29232.9403 \cdot x$$

$$R^2 = 0.9987$$

$$\text{BEC} = 0.000 \text{ ppb}$$

$$\text{LoD} = 0.0005 \text{ ppb}$$

**<sup>153</sup>Eu (KED)**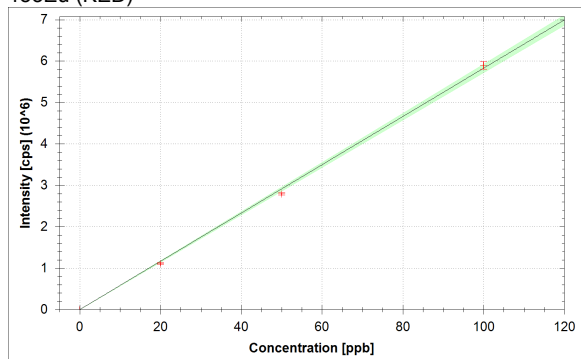

$$f(x) = 58255.0344 \cdot x + 3.3074$$

$$R^2 = 0.9990$$

$$\text{BEC} = 0.000 \text{ ppb}$$

$$\text{LoD} = 0.0001 \text{ ppb}$$

**<sup>158</sup>Gd (KED)**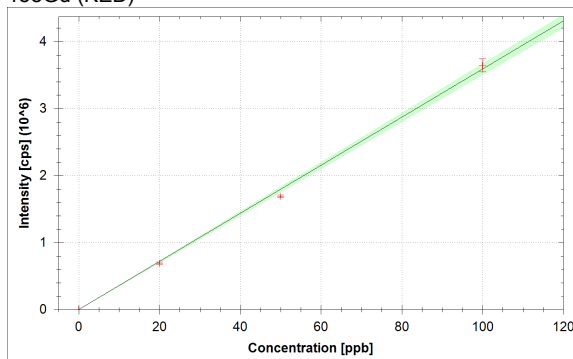

$$f(x) = 35885.3354 \cdot x + 5.5076$$

$$R^2 = 0.9984$$

$$\text{BEC} = 0.000 \text{ ppb}$$

$$\text{LoD} = 0.0003 \text{ ppb}$$

**<sup>164</sup>Dy (KED)**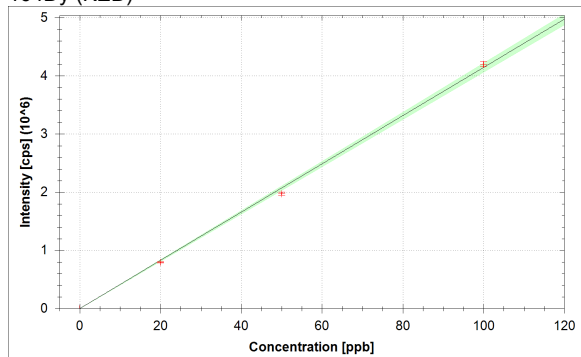

$$f(x) = 41440.2833 \cdot x + 7.7064$$

$$R^2 = 0.9989$$

$$\text{BEC} = 0.000 \text{ ppb}$$

$$\text{LoD} = 0.0002 \text{ ppb}$$

**<sup>166</sup>Er (KED)**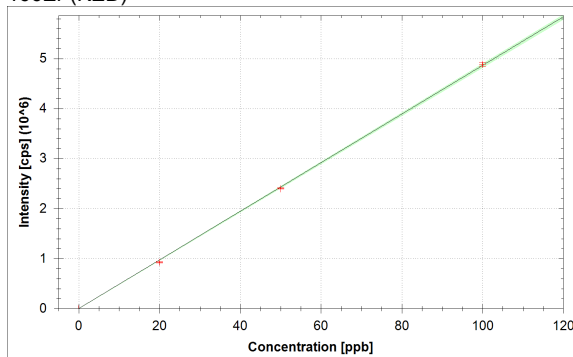

$$f(x) = 48634.9108 \cdot x + 226.0843$$

$$R^2 = 0.9998$$

$$\text{BEC} = 0.005 \text{ ppb}$$

$$\text{LoD} = 0.0029 \text{ ppb}$$

169Tm (KED)

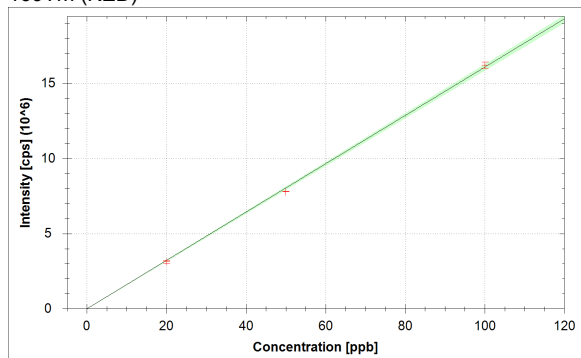

$$f(x) = 160709.0787 \cdot x + 12.1407$$

$$R^2 = 0.9995$$

$$\text{BEC} = 0.000 \text{ ppb}$$

$$\text{LoD} = 0.0000 \text{ ppb}$$

174Yb (KED)

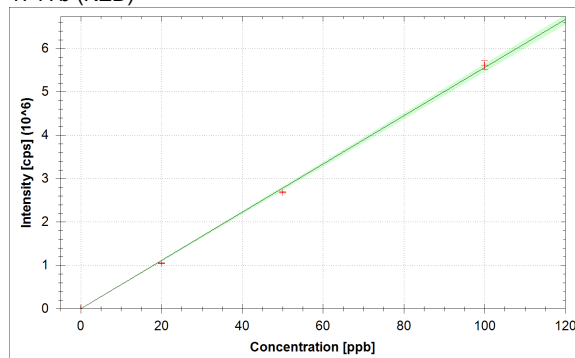

$$f(x) = 55567.4424 \cdot x + 8.8066$$

$$R^2 = 0.9993$$

$$\text{BEC} = 0.000 \text{ ppb}$$

$$\text{LoD} = 0.0004 \text{ ppb}$$

175Lu (KED)

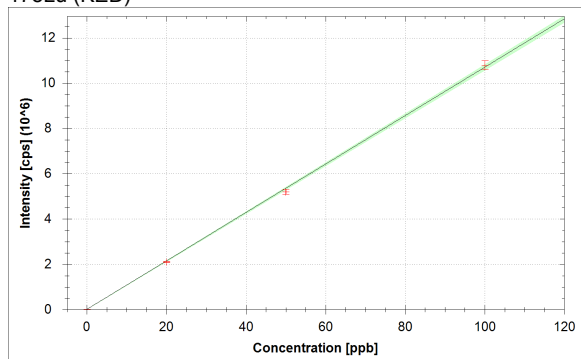

$$f(x) = 106914.8248 \cdot x + 12532.3896$$

$$R^2 = 0.9996$$

$$\text{BEC} = 0.117 \text{ ppb}$$

$$\text{LoD} = 0.0053 \text{ ppb}$$

205TI (KED)

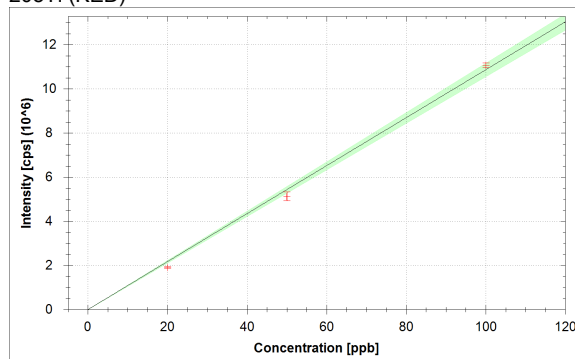

$$f(x) = 108662.8927 \cdot x + 13.4609$$

$$R^2 = 0.9976$$

$$\text{BEC} = 0.000 \text{ ppb}$$

$$\text{LoD} = 0.0001 \text{ ppb}$$

208Pb (KED)

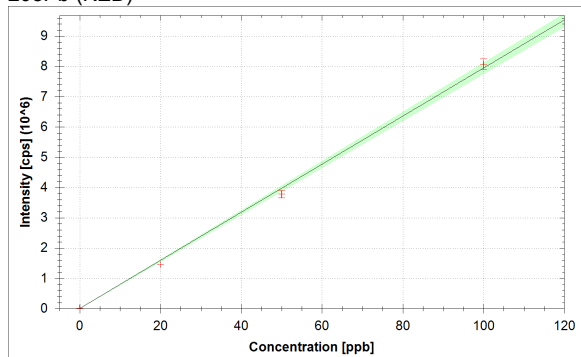

$$f(x) = 79416.2884 \cdot x + 3779.2864$$

$$R^2 = 0.9984$$

$$\text{BEC} = 0.048 \text{ ppb}$$

$$\text{LoD} = 0.0061 \text{ ppb}$$

232Th (KED)

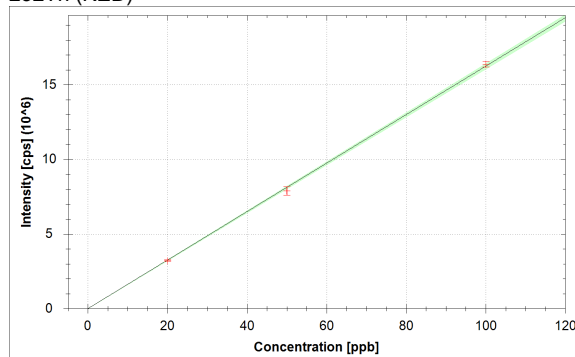

$$f(x) = 162480.4092 \cdot x + 32.4227$$

$$R^2 = 0.9996$$

$$\text{BEC} = 0.000 \text{ ppb}$$

$$\text{LoD} = 0.0003 \text{ ppb}$$

238U (KED)

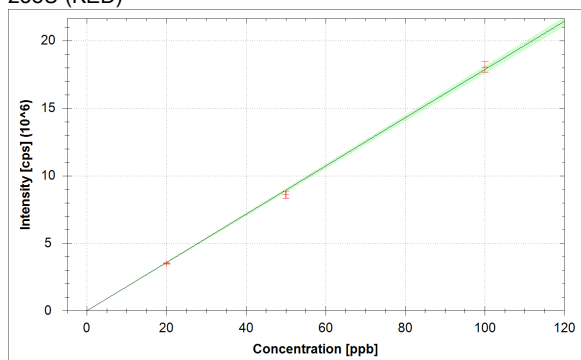

$$f(x) = 178599.8499 \cdot x + 43.5284$$

$$R^2 = 0.9993$$

$$\text{BEC} = 0.000 \text{ ppb}$$

$$\text{LoD} = 0.0002 \text{ ppb}$$

**Standards:**

Analysis Index: 3  
 Analysis Name: 0+20  
 Analysis Type: STD  
 Analysis Started at: 10/14/2021 11:18:24 AM  
 Standard (Stock): std0  
 Standard DF: 1

| Category    | Concentration average | Concentration RSD | Standard Concentration |
|-------------|-----------------------|-------------------|------------------------|
| 6Li (KED)   | 97.976 %              |                   |                        |
| 9Be (KED)   | 0.000 ppb             |                   | 0.000 ppb              |
| 11B (KED)   | 0.000 ppb             | 0.2 %             | 0.000 ppb              |
| 24Mg (KED)  | 0.000 ppb             | 0.1 %             | 0.000 ppb              |
| 27Al (KED)  | 0.000 ppb             | 0.1 %             | 0.000 ppb              |
| 45Sc (KED)  | 102.195 %             |                   |                        |
| 51V (KED)   | 0.000 ppb             | 0.9 %             | 0.000 ppb              |
| 52Cr (KED)  | 0.000 ppb             | 0.3 %             | 0.000 ppb              |
| 55Mn (KED)  | 0.000 ppb             | 0.2 %             | 0.000 ppb              |
| 56Fe (KED)  | 0.000 ppb             | 0.1 %             | 0.000 ppb              |
| 58Ni (KED)  | 0.000 ppb             | 0.1 %             | 0.000 ppb              |
| 59Co (KED)  | 0.000 ppb             | 0.2 %             | 0.000 ppb              |
| 63Cu (KED)  | 0.000 ppb             | 0.1 %             | 0.000 ppb              |
| 64Zn (KED)  | 0.000 ppb             | 0.1 %             | 0.000 ppb              |
| 69Ga (KED)  | 0.000 ppb             | 0.4 %             | 0.000 ppb              |
| 75As (KED)  | 0.000 ppb             | 0.3 %             | 0.000 ppb              |
| 80Se (KED)  | 0.000 ppb             | 0.0 %             | 0.000 ppb              |
| 85Rb (KED)  | 0.000 ppb             | 0.3 %             | 0.000 ppb              |
| 88Sr (KED)  | 0.000 ppb             | 0.1 %             | 0.000 ppb              |
| 89Y (KED)   | 102.200 %             |                   |                        |
| 107Ag (KED) | 0.000 ppb             | 0.6 %             | 0.000 ppb              |
| 114Cd (KED) | 0.000 ppb             | 0.3 %             | 0.000 ppb              |
| 115In (KED) | 100.806 %             |                   |                        |
| 133Cs (KED) | 0.000 ppb             | 0.2 %             | 0.000 ppb              |
| 138Ba (KED) | 0.000 ppb             | 0.0 %             | 0.000 ppb              |
| 139La (KED) | 0.000 ppb             | 0.2 %             | 0.000 ppb              |
| 140Ce (KED) | 0.000 ppb             | 0.2 %             | 0.000 ppb              |
| 141Pr (KED) | 0.000 ppb             | 1.0 %             | 0.000 ppb              |
| 142Nd (KED) | 0.000 ppb             | 0.3 %             | 0.000 ppb              |
| 152Sm (KED) | 0.000 ppb             |                   | 0.000 ppb              |
| 153Eu (KED) | 0.000 ppb             | 1.0 %             | 0.000 ppb              |
| 158Gd (KED) | 0.000 ppb             | 0.3 %             | 0.000 ppb              |
| 159Tb (KED) | 100.764 %             |                   |                        |
| 164Dy (KED) | 0.000 ppb             | 0.7 %             | 0.000 ppb              |
| 166Er (KED) | 0.000 ppb             | 0.1 %             | 0.000 ppb              |
| 169Tm (KED) | 0.000 ppb             | 0.4 %             | 0.000 ppb              |
| 174Yb (KED) | 0.000 ppb             | 0.6 %             | 0.000 ppb              |
| 175Lu (KED) | 0.000 ppb             | 0.0 %             | 0.000 ppb              |
| 205Tl (KED) | 0.000 ppb             | 0.5 %             | 0.000 ppb              |
| 208Pb (KED) | 0.000 ppb             | 0.1 %             | 0.000 ppb              |
| 209Bi (KED) | 99.497 %              |                   |                        |
| 232Th (KED) | 0.000 ppb             | 0.4 %             | 0.000 ppb              |
| 238U (KED)  | 0.000 ppb             | 0.1 %             | 0.000 ppb              |

## Standards:

Analysis Index: 4  
 Analysis Name: 20+20  
 Analysis Type: STD  
 Analysis Started at: 10/14/2021 11:21:51 AM  
 Standard (Stock): std3  
 Standard DF: 1

| Category    | Concentration average | Concentration RSD | Standard Concentration |
|-------------|-----------------------|-------------------|------------------------|
| 6Li (KED)   | 223.079 %             |                   |                        |
| 9Be (KED)   | 21.591 ppb            | 3.2 %             | 20.000 ppb             |
| 11B (KED)   | 12.853 ppb            | 10.1 %            | 20.000 ppb             |
| 24Mg (KED)  | 21.370 ppb            | 2.9 %             | 20.000 ppb             |
| 27Al (KED)  | 20.307 ppb            | 1.3 %             | 20.000 ppb             |
| 45Sc (KED)  | 262.675 %             |                   |                        |
| 51V (KED)   | 19.230 ppb            | 1.3 %             | 20.000 ppb             |
| 52Cr (KED)  | 19.830 ppb            | 1.3 %             | 20.000 ppb             |
| 55Mn (KED)  | 19.278 ppb            | 0.9 %             | 20.000 ppb             |
| 56Fe (KED)  | 19.716 ppb            | 1.7 %             | 20.000 ppb             |
| 58Ni (KED)  | 19.570 ppb            | 1.3 %             | 20.000 ppb             |
| 59Co (KED)  | 19.612 ppb            | 0.5 %             | 20.000 ppb             |
| 63Cu (KED)  | 19.810 ppb            | 2.3 %             | 20.000 ppb             |
| 64Zn (KED)  | 18.951 ppb            | 1.9 %             | 20.000 ppb             |
| 69Ga (KED)  | 19.679 ppb            | 1.6 %             | 20.000 ppb             |
| 75As (KED)  | 18.428 ppb            | 0.6 %             | 20.000 ppb             |
| 80Se (KED)  | 14.400 ppb            | 4.2 %             | 20.000 ppb             |
| 85Rb (KED)  | 17.709 ppb            | 0.3 %             | 20.000 ppb             |
| 88Sr (KED)  | 19.229 ppb            | 1.9 %             | 20.000 ppb             |
| 89Y (KED)   | 264.737 %             |                   |                        |
| 107Ag (KED) | 18.430 ppb            | 0.4 %             | 20.000 ppb             |
| 114Cd (KED) | 19.295 ppb            | 0.6 %             | 20.000 ppb             |
| 115In (KED) | 262.420 %             |                   |                        |
| 133Cs (KED) | 17.512 ppb            | 1.2 %             | 20.000 ppb             |
| 138Ba (KED) | 18.750 ppb            | 2.9 %             | 20.000 ppb             |
| 139La (KED) | 18.999 ppb            | 0.4 %             | 20.000 ppb             |
| 140Ce (KED) | 18.895 ppb            | 1.7 %             | 20.000 ppb             |
| 141Pr (KED) | 18.991 ppb            | 1.5 %             | 20.000 ppb             |
| 142Nd (KED) | 19.016 ppb            | 0.1 %             | 20.000 ppb             |
| 152Sm (KED) | 18.674 ppb            | 1.5 %             | 20.000 ppb             |
| 153Eu (KED) | 19.027 ppb            | 2.7 %             | 20.000 ppb             |
| 158Gd (KED) | 19.247 ppb            | 2.4 %             | 20.000 ppb             |
| 159Tb (KED) | 273.611 %             |                   |                        |
| 164Dy (KED) | 19.165 ppb            | 1.5 %             | 20.000 ppb             |
| 166Er (KED) | 19.070 ppb            | 1.9 %             | 20.000 ppb             |
| 169Tm (KED) | 19.444 ppb            | 2.9 %             | 20.000 ppb             |
| 174Yb (KED) | 18.830 ppb            | 1.1 %             | 20.000 ppb             |
| 175Lu (KED) | 19.538 ppb            | 1.5 %             | 20.000 ppb             |
| 205Tl (KED) | 17.553 ppb            | 2.4 %             | 20.000 ppb             |
| 208Pb (KED) | 18.236 ppb            | 0.1 %             | 20.000 ppb             |
| 209Bi (KED) | 256.213 %             |                   |                        |
| 232Th (KED) | 19.741 ppb            | 2.0 %             | 20.000 ppb             |
| 238U (KED)  | 19.516 ppb            | 1.2 %             | 20.000 ppb             |

**Standards:**

Analysis Index: 5  
 Analysis Name: 50+20  
 Analysis Type: STD  
 Analysis Started at: 10/14/2021 11:25:55 AM  
 Standard (Stock): std1  
 Standard DF: 1

| Category    | Concentration average | Concentration RSD | Standard Concentration |
|-------------|-----------------------|-------------------|------------------------|
| 6Li (KED)   | 199.857 %             |                   |                        |
| 9Be (KED)   | 49.959 ppb            | 5.5 %             | 50.000 ppb             |
| 11B (KED)   | 45.536 ppb            | 10.7 %            | 50.000 ppb             |
| 24Mg (KED)  | 50.016 ppb            | 4.3 %             | 50.000 ppb             |
| 27Al (KED)  | 49.664 ppb            | 3.2 %             | 50.000 ppb             |
| 45Sc (KED)  | 220.754 %             |                   |                        |
| 51V (KED)   | 48.637 ppb            | 1.4 %             | 50.000 ppb             |
| 52Cr (KED)  | 48.295 ppb            | 1.9 %             | 50.000 ppb             |
| 55Mn (KED)  | 48.506 ppb            | 2.0 %             | 50.000 ppb             |
| 56Fe (KED)  | 49.022 ppb            | 2.8 %             | 50.000 ppb             |
| 58Ni (KED)  | 49.104 ppb            | 3.8 %             | 50.000 ppb             |
| 59Co (KED)  | 48.982 ppb            | 2.4 %             | 50.000 ppb             |
| 63Cu (KED)  | 49.664 ppb            | 0.6 %             | 50.000 ppb             |
| 64Zn (KED)  | 48.914 ppb            | 0.4 %             | 50.000 ppb             |
| 69Ga (KED)  | 49.263 ppb            | 1.5 %             | 50.000 ppb             |
| 75As (KED)  | 48.820 ppb            | 0.1 %             | 50.000 ppb             |
| 80Se (KED)  | 46.765 ppb            | 2.6 %             | 50.000 ppb             |
| 85Rb (KED)  | 48.362 ppb            | 0.9 %             | 50.000 ppb             |
| 88Sr (KED)  | 49.005 ppb            | 0.8 %             | 50.000 ppb             |
| 89Y (KED)   | 218.876 %             |                   |                        |
| 107Ag (KED) | 47.980 ppb            | 2.0 %             | 50.000 ppb             |
| 114Cd (KED) | 48.843 ppb            | 1.4 %             | 50.000 ppb             |
| 115In (KED) | 218.616 %             |                   |                        |
| 133Cs (KED) | 46.757 ppb            | 1.4 %             | 50.000 ppb             |
| 138Ba (KED) | 47.843 ppb            | 2.2 %             | 50.000 ppb             |
| 139La (KED) | 48.552 ppb            | 1.1 %             | 50.000 ppb             |
| 140Ce (KED) | 48.852 ppb            | 2.9 %             | 50.000 ppb             |
| 141Pr (KED) | 48.678 ppb            | 2.2 %             | 50.000 ppb             |
| 142Nd (KED) | 47.807 ppb            | 0.7 %             | 50.000 ppb             |
| 152Sm (KED) | 47.684 ppb            | 2.0 %             | 50.000 ppb             |
| 153Eu (KED) | 47.881 ppb            | 1.0 %             | 50.000 ppb             |
| 158Gd (KED) | 47.112 ppb            | 1.2 %             | 50.000 ppb             |
| 159Tb (KED) | 228.006 %             |                   |                        |
| 164Dy (KED) | 47.669 ppb            | 1.4 %             | 50.000 ppb             |
| 166Er (KED) | 49.387 ppb            | 0.4 %             | 50.000 ppb             |
| 169Tm (KED) | 48.468 ppb            | 0.2 %             | 50.000 ppb             |
| 174Yb (KED) | 48.368 ppb            | 0.7 %             | 50.000 ppb             |
| 175Lu (KED) | 48.544 ppb            | 2.0 %             | 50.000 ppb             |
| 205Tl (KED) | 47.189 ppb            | 3.9 %             | 50.000 ppb             |
| 208Pb (KED) | 47.526 ppb            | 3.2 %             | 50.000 ppb             |
| 209Bi (KED) | 215.386 %             |                   |                        |
| 232Th (KED) | 48.510 ppb            | 3.6 %             | 50.000 ppb             |
| 238U (KED)  | 48.124 ppb            | 3.2 %             | 50.000 ppb             |

## Standards:

Analysis Index: 6  
 Analysis Name: 100+20  
 Analysis Type: STD  
 Analysis Started at: 10/14/2021 11:30:02 AM  
 Standard (Stock): std2  
 Standard DF: 1

| Category    | Concentration average | Concentration RSD | Standard Concentration |
|-------------|-----------------------|-------------------|------------------------|
| 6Li (KED)   | 184.465 %             |                   |                        |
| 9Be (KED)   | 99.702 ppb            | 0.5 %             | 100.000 ppb            |
| 11B (KED)   | 103.661 ppb           | 1.7 %             | 100.000 ppb            |
| 24Mg (KED)  | 99.718 ppb            | 0.3 %             | 100.000 ppb            |
| 27Al (KED)  | 100.107 ppb           | 1.7 %             | 100.000 ppb            |
| 45Sc (KED)  | 195.469 %             |                   |                        |
| 51V (KED)   | 100.836 ppb           | 0.6 %             | 100.000 ppb            |
| 52Cr (KED)  | 100.886 ppb           | 0.7 %             | 100.000 ppb            |
| 55Mn (KED)  | 100.891 ppb           | 1.4 %             | 100.000 ppb            |
| 56Fe (KED)  | 100.546 ppb           | 0.7 %             | 100.000 ppb            |
| 58Ni (KED)  | 100.534 ppb           | 0.0 %             | 100.000 ppb            |
| 59Co (KED)  | 100.587 ppb           | 0.6 %             | 100.000 ppb            |
| 63Cu (KED)  | 100.206 ppb           | 0.3 %             | 100.000 ppb            |
| 64Zn (KED)  | 100.753 ppb           | 0.7 %             | 100.000 ppb            |
| 69Ga (KED)  | 100.433 ppb           | 2.1 %             | 100.000 ppb            |
| 75As (KED)  | 100.905 ppb           | 0.5 %             | 100.000 ppb            |
| 80Se (KED)  | 102.737 ppb           | 1.1 %             | 100.000 ppb            |
| 85Rb (KED)  | 101.277 ppb           | 2.0 %             | 100.000 ppb            |
| 88Sr (KED)  | 100.652 ppb           | 0.7 %             | 100.000 ppb            |
| 89Y (KED)   | 196.924 %             |                   |                        |
| 107Ag (KED) | 101.324 ppb           | 1.0 %             | 100.000 ppb            |
| 114Cd (KED) | 100.720 ppb           | 2.4 %             | 100.000 ppb            |
| 115In (KED) | 193.398 %             |                   |                        |
| 133Cs (KED) | 102.119 ppb           | 0.9 %             | 100.000 ppb            |
| 138Ba (KED) | 101.329 ppb           | 0.7 %             | 100.000 ppb            |
| 139La (KED) | 100.924 ppb           | 2.3 %             | 100.000 ppb            |
| 140Ce (KED) | 100.795 ppb           | 2.2 %             | 100.000 ppb            |
| 141Pr (KED) | 100.863 ppb           | 2.1 %             | 100.000 ppb            |
| 142Nd (KED) | 101.293 ppb           | 0.8 %             | 100.000 ppb            |
| 152Sm (KED) | 101.423 ppb           | 1.0 %             | 100.000 ppb            |
| 153Eu (KED) | 101.254 ppb           | 1.6 %             | 100.000 ppb            |
| 158Gd (KED) | 101.595 ppb           | 2.6 %             | 100.000 ppb            |
| 159Tb (KED) | 201.119 %             |                   |                        |
| 164Dy (KED) | 101.333 ppb           | 1.0 %             | 100.000 ppb            |
| 166Er (KED) | 100.492 ppb           | 0.8 %             | 100.000 ppb            |
| 169Tm (KED) | 100.877 ppb           | 1.3 %             | 100.000 ppb            |
| 174Yb (KED) | 101.050 ppb           | 1.8 %             | 100.000 ppb            |
| 175Lu (KED) | 100.820 ppb           | 1.8 %             | 100.000 ppb            |
| 205Tl (KED) | 101.895 ppb           | 0.9 %             | 100.000 ppb            |
| 208Pb (KED) | 101.590 ppb           | 2.2 %             | 100.000 ppb            |
| 209Bi (KED) | 189.400 %             |                   |                        |
| 232Th (KED) | 100.797 ppb           | 1.1 %             | 100.000 ppb            |
| 238U (KED)  | 101.035 ppb           | 2.2 %             | 100.000 ppb            |

## Sample List Summary:

Instrument ID: iCAP Q

| Index: | Label:   | Main<br>Runs: | Survey<br>Runs: | Start Time:            | User name:                    |
|--------|----------|---------------|-----------------|------------------------|-------------------------------|
| 1      | water    | 3             | 0               | 10/14/2021 11:11:42 AM | WINDOWS-UPCI4ER\Administrator |
| 2      | blk      | 3             | 0               | 10/14/2021 11:14:44 AM | WINDOWS-UPCI4ER\Administrator |
| 3      | 0+20     | 3             | 0               | 10/14/2021 11:18:24 AM | WINDOWS-UPCI4ER\Administrator |
| 4      | 20+20    | 3             | 0               | 10/14/2021 11:21:51 AM | WINDOWS-UPCI4ER\Administrator |
| 5      | 50+20    | 3             | 0               | 10/14/2021 11:25:55 AM | WINDOWS-UPCI4ER\Administrator |
| 6      | 100+20   | 3             | 0               | 10/14/2021 11:30:02 AM | WINDOWS-UPCI4ER\Administrator |
| 7      | 2242jian | 3             | 0               | 10/14/2021 11:33:57 AM | WINDOWS-UPCI4ER\Administrator |
| 8      | 3402jian | 3             | 0               | 10/14/2021 11:38:01 AM | WINDOWS-UPCI4ER\Administrator |
| 9      | 3483jian | 3             | 0               | 10/14/2021 11:42:03 AM | WINDOWS-UPCI4ER\Administrator |
| 10     | 2650jian | 3             | 0               | 10/14/2021 11:46:23 AM | WINDOWS-UPCI4ER\Administrator |
| 11     | 3443jian | 3             | 0               | 10/14/2021 11:50:38 AM | WINDOWS-UPCI4ER\Administrator |
| 12     | 088jian  | 3             | 0               | 10/14/2021 11:54:52 AM | WINDOWS-UPCI4ER\Administrator |
| 13     | 0902jian | 3             | 0               | 10/14/2021 11:58:57 AM | WINDOWS-UPCI4ER\Administrator |
| 14     | 001jian  | 3             | 0               | 10/14/2021 12:03:20 PM | WINDOWS-UPCI4ER\Administrator |
| 15     | 3456jian | 3             | 0               | 10/14/2021 12:07:15 PM | WINDOWS-UPCI4ER\Administrator |
| 16     | 051jian  | 3             | 0               | 10/14/2021 12:11:19 PM | WINDOWS-UPCI4ER\Administrator |
| 17     | 024jian  | 3             | 0               | 10/14/2021 12:15:25 PM | WINDOWS-UPCI4ER\Administrator |
| 18     | 0939jian | 3             | 0               | 10/14/2021 12:19:48 PM | WINDOWS-UPCI4ER\Administrator |
| 19     | 2819ti   | 3             | 0               | 10/14/2021 12:23:51 PM | WINDOWS-UPCI4ER\Administrator |
| 20     | 2847ti   | 3             | 0               | 10/14/2021 12:27:45 PM | WINDOWS-UPCI4ER\Administrator |
| 21     | 073ti    | 3             | 0               | 10/14/2021 12:31:25 PM | WINDOWS-UPCI4ER\Administrator |
| 22     | 075ti    | 3             | 0               | 10/14/2021 12:35:17 PM | WINDOWS-UPCI4ER\Administrator |
| 23     | 2872ti   | 3             | 0               | 10/14/2021 12:39:01 PM | WINDOWS-UPCI4ER\Administrator |
| 24     | 2053ti   | 3             | 0               | 10/14/2021 12:42:58 PM | WINDOWS-UPCI4ER\Administrator |
| 25     | 072ti    | 3             | 0               | 10/14/2021 12:46:29 PM | WINDOWS-UPCI4ER\Administrator |
| 26     | 2862ti   | 3             | 0               | 10/14/2021 12:50:25 PM | WINDOWS-UPCI4ER\Administrator |
| 27     | 064ti    | 3             | 0               | 10/14/2021 12:54:15 PM | WINDOWS-UPCI4ER\Administrator |
| 28     | 2061ti   | 3             | 0               | 10/14/2021 12:58:37 PM | WINDOWS-UPCI4ER\Administrator |
| 29     | 3090ti   | 3             | 0               | 10/14/2021 1:02:08 PM  | WINDOWS-UPCI4ER\Administrator |
| 30     | 2054ti   | 3             | 0               | 10/14/2021 1:05:57 PM  | WINDOWS-UPCI4ER\Administrator |

## Sample Summary

Instrument ID: iCAP Q

Analysis index: 1

Analysis name: water

Analysis started at: 10/14/2021 11:11:42 AM

User name: WINDOWS-UPCI4ER\Administrator

| Category    | Concentration average | Concentration RSD |
|-------------|-----------------------|-------------------|
| 6Li (KED)   | 0.000 %               |                   |
| 11B (KED)   | Infinity ppb          |                   |
| 24Mg (KED)  | Infinity ppb          |                   |
| 27Al (KED)  | 37.959 ppb            | 101.5 %           |
| 45Sc (KED)  | 0.073 %               | 24.7 %            |
| 51V (KED)   | 0.176 ppb             | 173.5 %           |
| 52Cr (KED)  | 4.659 ppb             | 33.4 %            |
| 55Mn (KED)  | 2.323 ppb             | 20.1 %            |
| 56Fe (KED)  | 74.801 ppb            | 24.2 %            |
| 58Ni (KED)  | 22.354 ppb            | 22.7 %            |
| 59Co (KED)  | 0.061 ppb             | 178.3 %           |
| 63Cu (KED)  | Infinity ppb          |                   |
| 64Zn (KED)  | Infinity ppb          |                   |
| 69Ga (KED)  | Infinity ppb          |                   |
| 75As (KED)  | Infinity ppb          |                   |
| 80Se (KED)  | Infinity ppb          |                   |
| 88Sr (KED)  | Infinity ppb          |                   |
| 89Y (KED)   | 0.000 %               |                   |
| 114Cd (KED) | Infinity ppb          |                   |
| 115In (KED) | 0.000 %               |                   |
| 138Ba (KED) | Infinity ppb          |                   |
| 159Tb (KED) | 0.000 %               | 173.2 %           |
| 205Tl (KED) | 8.174 ppb             | 64.9 %            |
| 208Pb (KED) | 80.700 ppb            | 26.4 %            |
| 209Bi (KED) | 0.002 %               | 19.5 %            |
| 232Th (KED) | 0.000 ppb             | 0.0 %             |
| 238U (KED)  | 0.000 ppb             | 0.0 %             |

| Category    | Concentration average | Intensity average | Intensity RSD |
|-------------|-----------------------|-------------------|---------------|
| 6Li (KED)   | 0.000 %               | 0 cps             |               |
| 9Be (KED)   |                       | 0 cps             |               |
| 11B (KED)   | Infinity ppb          | 20 cps            | 16.7 %        |
| 24Mg (KED)  | Infinity ppb          | 42 cps            | 19.9 %        |
| 27Al (KED)  | 37.959 ppb            | 4 cps             | 114.6 %       |
| 45Sc (KED)  | 0.073 %               | 31 cps            | 24.7 %        |
| 51V (KED)   | 0.176 ppb             | 1 cps             | 173.2 %       |
| 52Cr (KED)  | 4.659 ppb             | 33 cps            | 17.3 %        |
| 55Mn (KED)  | 2.323 ppb             | 10 cps            | 33.3 %        |
| 56Fe (KED)  | 74.801 ppb            | 508 cps           | 12.3 %        |
| 58Ni (KED)  | 22.354 ppb            | 180 cps           | 11.6 %        |
| 59Co (KED)  | 0.061 ppb             | 1 cps             | 173.2 %       |
| 63Cu (KED)  | Infinity ppb          | 76 cps            | 44.2 %        |
| 64Zn (KED)  | Infinity ppb          | 554 cps           | 1.8 %         |
| 69Ga (KED)  | Infinity ppb          | 4 cps             | 43.3 %        |
| 75As (KED)  | Infinity ppb          | 12 cps            | 41.7 %        |
| 80Se (KED)  | Infinity ppb          | 3,175 cps         | 4.7 %         |
| 85Rb (KED)  |                       | 4 cps             | 86.6 %        |
| 88Sr (KED)  | Infinity ppb          | 18 cps            | 47.2 %        |
| 89Y (KED)   | 0.000 %               | 0 cps             |               |
| 107Ag (KED) |                       | 6 cps             | 124.9 %       |

| Category    | Concentration average | Intensity average | Intensity RSD |
|-------------|-----------------------|-------------------|---------------|
| 114Cd (KED) | Infinity ppb          | 6 cps             | 69.3 %        |
| 115In (KED) | 0.000 %               | 0 cps             |               |
| 133Cs (KED) |                       | 2 cps             | 86.6 %        |
| 138Ba (KED) | Infinity ppb          | 110 cps           | 28.9 %        |
| 139La (KED) |                       | 3 cps             | 173.2 %       |
| 140Ce (KED) |                       | 0 cps             |               |
| 141Pr (KED) |                       | 1 cps             | 173.2 %       |
| 142Nd (KED) |                       | 0 cps             |               |
| 152Sm (KED) |                       | 0 cps             |               |
| 153Eu (KED) |                       | 0 cps             |               |
| 158Gd (KED) |                       | 0 cps             |               |
| 159Tb (KED) | 0.000 %               | 1 cps             | 173.2 %       |
| 164Dy (KED) |                       | 0 cps             |               |
| 166Er (KED) |                       | 1 cps             | 173.2 %       |
| 169Tm (KED) |                       | 0 cps             |               |
| 174Yb (KED) |                       | 0 cps             |               |
| 175Lu (KED) |                       | 0 cps             |               |
| 205Tl (KED) | 8.174 ppb             | 14 cps            | 70.5 %        |
| 208Pb (KED) | 80.700 ppb            | 99 cps            | 9.7 %         |
| 209Bi (KED) | 0.002 %               | 36 cps            | 19.5 %        |
| 232Th (KED) | 0.000 ppb             | 0 cps             |               |
| 238U (KED)  | 0.000 ppb             | 0 cps             |               |

## Sample Summary

Instrument ID: iCAP Q

Analysis index: 2

Analysis name: blk

Analysis started at: 10/14/2021 11:14:44 AM

User name: WINDOWS-UPCI4ER\Administrator

| Category    | Concentration average | Concentration RSD |
|-------------|-----------------------|-------------------|
| 6Li (KED)   | 100.000 %             |                   |
| 9Be (KED)   | 0.000 ppb             |                   |
| 11B (KED)   | 0.553 ppb             | 240.2 %           |
| 24Mg (KED)  | -0.015 ppb            | 254.4 %           |
| 27Al (KED)  | 0.044 ppb             | 214.7 %           |
| 45Sc (KED)  | 100.000 %             |                   |
| 51V (KED)   | 0.000 ppb             | 4,197.3 %         |
| 52Cr (KED)  | -0.001 ppb            | 356.9 %           |
| 55Mn (KED)  | -0.003 ppb            | 131.0 %           |
| 56Fe (KED)  | 0.009 ppb             | 64.4 %            |
| 58Ni (KED)  | 0.002 ppb             | 73.9 %            |
| 59Co (KED)  | 0.000 ppb             | 1,367.6 %         |
| 63Cu (KED)  | 0.003 ppb             | 120.6 %           |
| 64Zn (KED)  | -0.018 ppb            | 95.7 %            |
| 69Ga (KED)  | 0.003 ppb             | 142.3 %           |
| 75As (KED)  | 0.005 ppb             | 26.0 %            |
| 80Se (KED)  | 0.126 ppb             | 293.9 %           |
| 85Rb (KED)  | 0.000 ppb             | 472.9 %           |
| 88Sr (KED)  | 0.002 ppb             | 81.6 %            |
| 89Y (KED)   | 100.000 %             |                   |
| 107Ag (KED) | 0.000 ppb             | 1,237.6 %         |
| 114Cd (KED) | 0.001 ppb             | 63.5 %            |
| 115In (KED) | 100.000 %             |                   |
| 133Cs (KED) | 0.000 ppb             | 189.6 %           |
| 138Ba (KED) | 0.007 ppb             | 123.0 %           |
| 139La (KED) | 0.000 ppb             | 26.2 %            |
| 140Ce (KED) | 0.000 ppb             | 69.1 %            |
| 141Pr (KED) | 0.000 ppb             | 103.6 %           |
| 142Nd (KED) | 0.000 ppb             | 51.9 %            |
| 152Sm (KED) | 0.000 ppb             | 114.8 %           |
| 153Eu (KED) | 0.000 ppb             | 87.5 %            |
| 158Gd (KED) | 0.000 ppb             | 151.3 %           |
| 159Tb (KED) | 100.000 %             |                   |
| 164Dy (KED) | 0.000 ppb             | 146.9 %           |
| 166Er (KED) | 0.000 ppb             | 1,561.0 %         |
| 169Tm (KED) | 0.000 ppb             | 57.6 %            |
| 174Yb (KED) | 0.000 ppb             | 83.8 %            |
| 175Lu (KED) | 0.002 ppb             | 100.4 %           |
| 205Tl (KED) | 0.000 ppb             | 113.6 %           |
| 208Pb (KED) | -0.001 ppb            | 245.5 %           |
| 209Bi (KED) | 100.000 %             |                   |
| 232Th (KED) | 0.000 ppb             | 145.4 %           |
| 238U (KED)  | 0.000 ppb             | 84.8 %            |

| Category   | Concentration average | Intensity average | Intensity RSD |
|------------|-----------------------|-------------------|---------------|
| 6Li (KED)  | 100.000 %             | 2,087 cps         | 4.7 %         |
| 9Be (KED)  | 0.000 ppb             | 0 cps             |               |
| 11B (KED)  | 0.553 ppb             | 828 cps           | 8.0 %         |
| 24Mg (KED) | -0.015 ppb            | 94 cps            | 14.3 %        |
| 27Al (KED) | 0.044 ppb             | 86 cps            | 15.7 %        |

| Category    | Concentration average | Intensity average | Intensity RSD |
|-------------|-----------------------|-------------------|---------------|
| 45Sc (KED)  | 100.000 %             | 42,824 cps        | 0.7 %         |
| 51V (KED)   | 0.000 ppb             | 2 cps             | 86.6 %        |
| 52Cr (KED)  | -0.001 ppb            | 128 cps           | 18.3 %        |
| 55Mn (KED)  | -0.003 ppb            | 117 cps           | 20.0 %        |
| 56Fe (KED)  | 0.009 ppb             | 2,461 cps         | 1.9 %         |
| 58Ni (KED)  | 0.002 ppb             | 268 cps           | 5.0 %         |
| 59Co (KED)  | 0.000 ppb             | 33 cps            | 20.0 %        |
| 63Cu (KED)  | 0.003 ppb             | 397 cps           | 13.9 %        |
| 64Zn (KED)  | -0.018 ppb            | 720 cps           | 10.9 %        |
| 69Ga (KED)  | 0.003 ppb             | 50 cps            | 43.7 %        |
| 75As (KED)  | 0.005 ppb             | 18 cps            | 10.8 %        |
| 80Se (KED)  | 0.126 ppb             | 3,168 cps         | 4.7 %         |
| 85Rb (KED)  | 0.000 ppb             | 26 cps            | 30.1 %        |
| 88Sr (KED)  | 0.002 ppb             | 88 cps            | 14.4 %        |
| 89Y (KED)   | 100.000 %             | 355,366 cps       | 1.0 %         |
| 107Ag (KED) | 0.000 ppb             | 29 cps            | 53.3 %        |
| 114Cd (KED) | 0.001 ppb             | 63 cps            | 18.2 %        |
| 115In (KED) | 100.000 %             | 634,486 cps       | 0.4 %         |
| 133Cs (KED) | 0.000 ppb             | 28 cps            | 54.1 %        |
| 138Ba (KED) | 0.007 ppb             | 901 cps           | 30.2 %        |
| 139La (KED) | 0.000 ppb             | 11 cps            | 17.3 %        |
| 140Ce (KED) | 0.000 ppb             | 117 cps           | 10.3 %        |
| 141Pr (KED) | 0.000 ppb             | 18 cps            | 84.5 %        |
| 142Nd (KED) | 0.000 ppb             | 10 cps            | 33.3 %        |
| 152Sm (KED) | 0.000 ppb             | 4 cps             | 114.6 %       |
| 153Eu (KED) | 0.000 ppb             | 1 cps             | 173.2 %       |
| 158Gd (KED) | 0.000 ppb             | 3 cps             | 100.0 %       |
| 159Tb (KED) | 100.000 %             | 2,635,068 cps     | 0.7 %         |
| 164Dy (KED) | 0.000 ppb             | 10 cps            | 33.3 %        |
| 166Er (KED) | 0.000 ppb             | 229 cps           | 19.8 %        |
| 169Tm (KED) | 0.000 ppb             | 9 cps             | 21.7 %        |
| 174Yb (KED) | 0.000 ppb             | 17 cps            | 40.0 %        |
| 175Lu (KED) | 0.002 ppb             | 12,720 cps        | 1.2 %         |
| 205Tl (KED) | 0.000 ppb             | 18 cps            | 28.6 %        |
| 208Pb (KED) | -0.001 ppb            | 3,713 cps         | 4.2 %         |
| 209Bi (KED) | 100.000 %             | 2,231,637 cps     | 1.4 %         |
| 232Th (KED) | 0.000 ppb             | 44 cps            | 38.5 %        |
| 238U (KED)  | 0.000 ppb             | 58 cps            | 20.3 %        |

## Sample Summary

Instrument ID: iCAP Q

Analysis index: 3

Analysis name: 0+20

Analysis started at: 10/14/2021 11:18:24 AM

User name: WINDOWS-UPCI4ER\Administrator

| Category    | Concentration average | Concentration RSD |
|-------------|-----------------------|-------------------|
| 6Li (KED)   | 97.976 %              |                   |
| 9Be (KED)   | 0.000 ppb             |                   |
| 11B (KED)   | 0.000 ppb             | 0.2 %             |
| 24Mg (KED)  | 0.000 ppb             | 0.1 %             |
| 27Al (KED)  | 0.000 ppb             | 0.1 %             |
| 45Sc (KED)  | 102.195 %             |                   |
| 51V (KED)   | 0.000 ppb             | 0.9 %             |
| 52Cr (KED)  | 0.000 ppb             | 0.3 %             |
| 55Mn (KED)  | 0.000 ppb             | 0.2 %             |
| 56Fe (KED)  | 0.000 ppb             | 0.1 %             |
| 58Ni (KED)  | 0.000 ppb             | 0.1 %             |
| 59Co (KED)  | 0.000 ppb             | 0.2 %             |
| 63Cu (KED)  | 0.000 ppb             | 0.1 %             |
| 64Zn (KED)  | 0.000 ppb             | 0.1 %             |
| 69Ga (KED)  | 0.000 ppb             | 0.4 %             |
| 75As (KED)  | 0.000 ppb             | 0.3 %             |
| 80Se (KED)  | 0.000 ppb             | 0.0 %             |
| 85Rb (KED)  | 0.000 ppb             | 0.3 %             |
| 88Sr (KED)  | 0.000 ppb             | 0.1 %             |
| 89Y (KED)   | 102.200 %             |                   |
| 107Ag (KED) | 0.000 ppb             | 0.6 %             |
| 114Cd (KED) | 0.000 ppb             | 0.3 %             |
| 115In (KED) | 100.806 %             |                   |
| 133Cs (KED) | 0.000 ppb             | 0.2 %             |
| 138Ba (KED) | 0.000 ppb             | 0.0 %             |
| 139La (KED) | 0.000 ppb             | 0.2 %             |
| 140Ce (KED) | 0.000 ppb             | 0.2 %             |
| 141Pr (KED) | 0.000 ppb             | 1.0 %             |
| 142Nd (KED) | 0.000 ppb             | 0.3 %             |
| 152Sm (KED) | 0.000 ppb             |                   |
| 153Eu (KED) | 0.000 ppb             | 1.0 %             |
| 158Gd (KED) | 0.000 ppb             | 0.3 %             |
| 159Tb (KED) | 100.764 %             |                   |
| 164Dy (KED) | 0.000 ppb             | 0.7 %             |
| 166Er (KED) | 0.000 ppb             | 0.1 %             |
| 169Tm (KED) | 0.000 ppb             | 0.4 %             |
| 174Yb (KED) | 0.000 ppb             | 0.6 %             |
| 175Lu (KED) | 0.000 ppb             | 0.0 %             |
| 205Tl (KED) | 0.000 ppb             | 0.5 %             |
| 208Pb (KED) | 0.000 ppb             | 0.1 %             |
| 209Bi (KED) | 99.497 %              |                   |
| 232Th (KED) | 0.000 ppb             | 0.4 %             |
| 238U (KED)  | 0.000 ppb             | 0.1 %             |

| Category   | Concentration average | Intensity average | Intensity RSD |
|------------|-----------------------|-------------------|---------------|
| 6Li (KED)  | 97.976 %              | 2,045 cps         | 2.4 %         |
| 9Be (KED)  | 0.000 ppb             | 0 cps             |               |
| 11B (KED)  | 0.000 ppb             | 778 cps           | 13.4 %        |
| 24Mg (KED) | 0.000 ppb             | 100 cps           | 10.0 %        |
| 27Al (KED) | 0.000 ppb             | 81 cps            | 10.3 %        |

| Category    | Concentration average | Intensity average | Intensity RSD |
|-------------|-----------------------|-------------------|---------------|
| 45Sc (KED)  | 102.195 %             | 43,764 cps        | 1.4 %         |
| 51V (KED)   | 0.000 ppb             | 2 cps             | 86.6 %        |
| 52Cr (KED)  | 0.000 ppb             | 138 cps           | 26.1 %        |
| 55Mn (KED)  | 0.000 ppb             | 137 cps           | 18.4 %        |
| 56Fe (KED)  | 0.000 ppb             | 2,422 cps         | 4.6 %         |
| 58Ni (KED)  | 0.000 ppb             | 256 cps           | 8.7 %         |
| 59Co (KED)  | 0.000 ppb             | 34 cps            | 20.1 %        |
| 63Cu (KED)  | 0.000 ppb             | 361 cps           | 11.1 %        |
| 64Zn (KED)  | 0.000 ppb             | 819 cps           | 5.3 %         |
| 69Ga (KED)  | 0.000 ppb             | 36 cps            | 42.3 %        |
| 75As (KED)  | 0.000 ppb             | 11 cps            | 34.6 %        |
| 80Se (KED)  | 0.000 ppb             | 3,185 cps         | 3.2 %         |
| 85Rb (KED)  | 0.000 ppb             | 24 cps            | 31.5 %        |
| 88Sr (KED)  | 0.000 ppb             | 73 cps            | 9.1 %         |
| 89Y (KED)   | 102.200 %             | 363,185 cps       | 0.1 %         |
| 107Ag (KED) | 0.000 ppb             | 28 cps            | 59.2 %        |
| 114Cd (KED) | 0.000 ppb             | 46 cps            | 25.7 %        |
| 115In (KED) | 100.806 %             | 639,598 cps       | 0.8 %         |
| 133Cs (KED) | 0.000 ppb             | 20 cps            | 16.7 %        |
| 138Ba (KED) | 0.000 ppb             | 684 cps           | 3.8 %         |
| 139La (KED) | 0.000 ppb             | 19 cps            | 20.4 %        |
| 140Ce (KED) | 0.000 ppb             | 101 cps           | 15.6 %        |
| 141Pr (KED) | 0.000 ppb             | 3 cps             | 100.0 %       |
| 142Nd (KED) | 0.000 ppb             | 17 cps            | 34.6 %        |
| 152Sm (KED) | 0.000 ppb             | 0 cps             |               |
| 153Eu (KED) | 0.000 ppb             | 3 cps             | 100.0 %       |
| 158Gd (KED) | 0.000 ppb             | 6 cps             | 34.6 %        |
| 159Tb (KED) | 100.764 %             | 2,655,209 cps     | 0.5 %         |
| 164Dy (KED) | 0.000 ppb             | 8 cps             | 65.5 %        |
| 166Er (KED) | 0.000 ppb             | 228 cps           | 8.1 %         |
| 169Tm (KED) | 0.000 ppb             | 12 cps            | 41.7 %        |
| 174Yb (KED) | 0.000 ppb             | 9 cps             | 57.3 %        |
| 175Lu (KED) | 0.000 ppb             | 12,628 cps        | 2.5 %         |
| 205Tl (KED) | 0.000 ppb             | 13 cps            | 50.0 %        |
| 208Pb (KED) | 0.000 ppb             | 3,757 cps         | 7.1 %         |
| 209Bi (KED) | 99.497 %              | 2,220,410 cps     | 1.5 %         |
| 232Th (KED) | 0.000 ppb             | 32 cps            | 43.1 %        |
| 238U (KED)  | 0.000 ppb             | 43 cps            | 13.3 %        |

## Sample Summary

Instrument ID: iCAP Q

Analysis index: 4

Analysis name: 20+20

Analysis started at: 10/14/2021 11:21:51 AM

User name: WINDOWS-UPCI4ER\Administrator

| Category    | Concentration average | Concentration RSD |
|-------------|-----------------------|-------------------|
| 6Li (KED)   | 223.079 %             |                   |
| 9Be (KED)   | 21.591 ppb            | 3.2 %             |
| 11B (KED)   | 12.853 ppb            | 10.1 %            |
| 24Mg (KED)  | 21.370 ppb            | 2.9 %             |
| 27Al (KED)  | 20.307 ppb            | 1.3 %             |
| 45Sc (KED)  | 262.675 %             |                   |
| 51V (KED)   | 19.230 ppb            | 1.3 %             |
| 52Cr (KED)  | 19.830 ppb            | 1.3 %             |
| 55Mn (KED)  | 19.278 ppb            | 0.9 %             |
| 56Fe (KED)  | 19.716 ppb            | 1.7 %             |
| 58Ni (KED)  | 19.570 ppb            | 1.3 %             |
| 59Co (KED)  | 19.612 ppb            | 0.5 %             |
| 63Cu (KED)  | 19.810 ppb            | 2.3 %             |
| 64Zn (KED)  | 18.951 ppb            | 1.9 %             |
| 69Ga (KED)  | 19.679 ppb            | 1.6 %             |
| 75As (KED)  | 18.428 ppb            | 0.6 %             |
| 80Se (KED)  | 14.400 ppb            | 4.2 %             |
| 85Rb (KED)  | 17.709 ppb            | 0.3 %             |
| 88Sr (KED)  | 19.229 ppb            | 1.9 %             |
| 89Y (KED)   | 264.737 %             |                   |
| 107Ag (KED) | 18.430 ppb            | 0.4 %             |
| 114Cd (KED) | 19.295 ppb            | 0.6 %             |
| 115In (KED) | 262.420 %             |                   |
| 133Cs (KED) | 17.512 ppb            | 1.2 %             |
| 138Ba (KED) | 18.750 ppb            | 2.9 %             |
| 139La (KED) | 18.999 ppb            | 0.4 %             |
| 140Ce (KED) | 18.895 ppb            | 1.7 %             |
| 141Pr (KED) | 18.991 ppb            | 1.5 %             |
| 142Nd (KED) | 19.016 ppb            | 0.1 %             |
| 152Sm (KED) | 18.674 ppb            | 1.5 %             |
| 153Eu (KED) | 19.027 ppb            | 2.7 %             |
| 158Gd (KED) | 19.247 ppb            | 2.4 %             |
| 159Tb (KED) | 273.611 %             |                   |
| 164Dy (KED) | 19.165 ppb            | 1.5 %             |
| 166Er (KED) | 19.070 ppb            | 1.9 %             |
| 169Tm (KED) | 19.444 ppb            | 2.9 %             |
| 174Yb (KED) | 18.830 ppb            | 1.1 %             |
| 175Lu (KED) | 19.538 ppb            | 1.5 %             |
| 205Tl (KED) | 17.553 ppb            | 2.4 %             |
| 208Pb (KED) | 18.236 ppb            | 0.1 %             |
| 209Bi (KED) | 256.213 %             |                   |
| 232Th (KED) | 19.741 ppb            | 2.0 %             |
| 238U (KED)  | 19.516 ppb            | 1.2 %             |

| Category   | Concentration average | Intensity average | Intensity RSD |
|------------|-----------------------|-------------------|---------------|
| 6Li (KED)  | 223.079 %             | 4,655 cps         | 3.2 %         |
| 9Be (KED)  | 21.591 ppb            | 5,832 cps         | 1.4 %         |
| 11B (KED)  | 12.853 ppb            | 3,508 cps         | 6.1 %         |
| 24Mg (KED) | 21.370 ppb            | 23,281 cps        | 1.8 %         |
| 27Al (KED) | 20.307 ppb            | 7,619 cps         | 1.4 %         |

| Category    | Concentration average | Intensity average | Intensity RSD |
|-------------|-----------------------|-------------------|---------------|
| 45Sc (KED)  | 262.675 %             | 112,489 cps       | 1.0 %         |
| 51V (KED)   | 19.230 ppb            | 340,914 cps       | 0.3 %         |
| 52Cr (KED)  | 19.830 ppb            | 537,483 cps       | 0.3 %         |
| 55Mn (KED)  | 19.278 ppb            | 295,659 cps       | 1.0 %         |
| 56Fe (KED)  | 19.716 ppb            | 504,880 cps       | 0.8 %         |
| 58Ni (KED)  | 19.570 ppb            | 588,220 cps       | 1.1 %         |
| 59Co (KED)  | 19.612 ppb            | 969,210 cps       | 0.5 %         |
| 63Cu (KED)  | 19.810 ppb            | 718,257 cps       | 1.2 %         |
| 64Zn (KED)  | 18.951 ppb            | 224,424 cps       | 0.4 %         |
| 69Ga (KED)  | 19.679 ppb            | 288,159 cps       | 0.2 %         |
| 75As (KED)  | 18.428 ppb            | 61,231 cps        | 1.2 %         |
| 80Se (KED)  | 14.400 ppb            | 23,992 cps        | 1.5 %         |
| 85Rb (KED)  | 17.709 ppb            | 242,104 cps       | 1.1 %         |
| 88Sr (KED)  | 19.229 ppb            | 385,245 cps       | 2.2 %         |
| 89Y (KED)   | 264.737 %             | 940,785 cps       | 1.4 %         |
| 107Ag (KED) | 18.430 ppb            | 1,682,588 cps     | 0.3 %         |
| 114Cd (KED) | 19.295 ppb            | 743,593 cps       | 0.7 %         |
| 115In (KED) | 262.420 %             | 1,665,020 cps     | 0.5 %         |
| 133Cs (KED) | 17.512 ppb            | 1,131,650 cps     | 0.9 %         |
| 138Ba (KED) | 18.750 ppb            | 1,568,997 cps     | 2.1 %         |
| 139La (KED) | 18.999 ppb            | 3,207,472 cps     | 2.1 %         |
| 140Ce (KED) | 18.895 ppb            | 4,048,301 cps     | 1.7 %         |
| 141Pr (KED) | 18.991 ppb            | 4,377,290 cps     | 1.1 %         |
| 142Nd (KED) | 19.016 ppb            | 1,734,300 cps     | 1.8 %         |
| 152Sm (KED) | 18.674 ppb            | 1,493,369 cps     | 0.8 %         |
| 153Eu (KED) | 19.027 ppb            | 3,031,690 cps     | 1.0 %         |
| 158Gd (KED) | 19.247 ppb            | 1,889,266 cps     | 0.5 %         |
| 159Tb (KED) | 273.611 %             | 7,209,825 cps     | 2.0 %         |
| 164Dy (KED) | 19.165 ppb            | 2,172,791 cps     | 1.5 %         |
| 166Er (KED) | 19.070 ppb            | 2,537,840 cps     | 1.3 %         |
| 169Tm (KED) | 19.444 ppb            | 8,547,360 cps     | 1.7 %         |
| 174Yb (KED) | 18.830 ppb            | 2,862,539 cps     | 1.0 %         |
| 175Lu (KED) | 19.538 ppb            | 5,748,699 cps     | 1.1 %         |
| 205Tl (KED) | 17.553 ppb            | 4,887,695 cps     | 3.3 %         |
| 208Pb (KED) | 18.236 ppb            | 3,720,347 cps     | 1.1 %         |
| 209Bi (KED) | 256.213 %             | 5,717,747 cps     | 0.9 %         |
| 232Th (KED) | 19.741 ppb            | 8,216,977 cps     | 1.1 %         |
| 238U (KED)  | 19.516 ppb            | 8,930,073 cps     | 1.1 %         |

## Sample Summary

Instrument ID: iCAP Q

Analysis index: 5

Analysis name: 50+20

Analysis started at: 10/14/2021 11:25:55 AM

User name: WINDOWS-UPCI4ER\Administrator

| Category    | Concentration average | Concentration RSD |
|-------------|-----------------------|-------------------|
| 6Li (KED)   | 199.857 %             |                   |
| 9Be (KED)   | 49.959 ppb            | 5.5 %             |
| 11B (KED)   | 45.536 ppb            | 10.7 %            |
| 24Mg (KED)  | 50.016 ppb            | 4.3 %             |
| 27Al (KED)  | 49.664 ppb            | 3.2 %             |
| 45Sc (KED)  | 220.754 %             |                   |
| 51V (KED)   | 48.637 ppb            | 1.4 %             |
| 52Cr (KED)  | 48.295 ppb            | 1.9 %             |
| 55Mn (KED)  | 48.506 ppb            | 2.0 %             |
| 56Fe (KED)  | 49.022 ppb            | 2.8 %             |
| 58Ni (KED)  | 49.104 ppb            | 3.8 %             |
| 59Co (KED)  | 48.982 ppb            | 2.4 %             |
| 63Cu (KED)  | 49.664 ppb            | 0.6 %             |
| 64Zn (KED)  | 48.914 ppb            | 0.4 %             |
| 69Ga (KED)  | 49.263 ppb            | 1.5 %             |
| 75As (KED)  | 48.820 ppb            | 0.1 %             |
| 80Se (KED)  | 46.765 ppb            | 2.6 %             |
| 85Rb (KED)  | 48.362 ppb            | 0.9 %             |
| 88Sr (KED)  | 49.005 ppb            | 0.8 %             |
| 89Y (KED)   | 218.876 %             |                   |
| 107Ag (KED) | 47.980 ppb            | 2.0 %             |
| 114Cd (KED) | 48.843 ppb            | 1.4 %             |
| 115In (KED) | 218.616 %             |                   |
| 133Cs (KED) | 46.757 ppb            | 1.4 %             |
| 138Ba (KED) | 47.843 ppb            | 2.2 %             |
| 139La (KED) | 48.552 ppb            | 1.1 %             |
| 140Ce (KED) | 48.852 ppb            | 2.9 %             |
| 141Pr (KED) | 48.678 ppb            | 2.2 %             |
| 142Nd (KED) | 47.807 ppb            | 0.7 %             |
| 152Sm (KED) | 47.684 ppb            | 2.0 %             |
| 153Eu (KED) | 47.881 ppb            | 1.0 %             |
| 158Gd (KED) | 47.112 ppb            | 1.2 %             |
| 159Tb (KED) | 228.006 %             |                   |
| 164Dy (KED) | 47.669 ppb            | 1.4 %             |
| 166Er (KED) | 49.387 ppb            | 0.4 %             |
| 169Tm (KED) | 48.468 ppb            | 0.2 %             |
| 174Yb (KED) | 48.368 ppb            | 0.7 %             |
| 175Lu (KED) | 48.544 ppb            | 2.0 %             |
| 205Tl (KED) | 47.189 ppb            | 3.9 %             |
| 208Pb (KED) | 47.526 ppb            | 3.2 %             |
| 209Bi (KED) | 215.386 %             |                   |
| 232Th (KED) | 48.510 ppb            | 3.6 %             |
| 238U (KED)  | 48.124 ppb            | 3.2 %             |

| Category   | Concentration average | Intensity average | Intensity RSD |
|------------|-----------------------|-------------------|---------------|
| 6Li (KED)  | 199.857 %             | 4,171 cps         | 4.6 %         |
| 9Be (KED)  | 49.959 ppb            | 12,078 cps        | 0.8 %         |
| 11B (KED)  | 45.536 ppb            | 7,072 cps         | 3.6 %         |
| 24Mg (KED) | 50.016 ppb            | 48,503 cps        | 0.7 %         |
| 27Al (KED) | 49.664 ppb            | 15,407 cps        | 4.0 %         |

| Category    | Concentration average | Intensity average | Intensity RSD |
|-------------|-----------------------|-------------------|---------------|
| 45Sc (KED)  | 220.754 %             | 94,537 cps        | 2.2 %         |
| 51V (KED)   | 48.637 ppb            | 724,534 cps       | 0.9 %         |
| 52Cr (KED)  | 48.295 ppb            | 1,099,486 cps     | 0.7 %         |
| 55Mn (KED)  | 48.506 ppb            | 624,583 cps       | 0.8 %         |
| 56Fe (KED)  | 49.022 ppb            | 1,046,899 cps     | 0.5 %         |
| 58Ni (KED)  | 49.104 ppb            | 1,238,874 cps     | 1.6 %         |
| 59Co (KED)  | 48.982 ppb            | 2,033,599 cps     | 0.6 %         |
| 63Cu (KED)  | 49.664 ppb            | 1,487,826 cps     | 0.9 %         |
| 64Zn (KED)  | 48.914 ppb            | 476,219 cps       | 1.1 %         |
| 69Ga (KED)  | 49.263 ppb            | 596,333 cps       | 1.0 %         |
| 75As (KED)  | 48.820 ppb            | 134,082 cps       | 0.9 %         |
| 80Se (KED)  | 46.765 ppb            | 49,101 cps        | 1.9 %         |
| 85Rb (KED)  | 48.362 ppb            | 546,534 cps       | 0.7 %         |
| 88Sr (KED)  | 49.005 ppb            | 811,479 cps       | 1.2 %         |
| 89Y (KED)   | 218.876 %             | 777,812 cps       | 1.0 %         |
| 107Ag (KED) | 47.980 ppb            | 3,648,384 cps     | 0.6 %         |
| 114Cd (KED) | 48.843 ppb            | 1,567,772 cps     | 0.7 %         |
| 115In (KED) | 218.616 %             | 1,387,087 cps     | 1.6 %         |
| 133Cs (KED) | 46.757 ppb            | 2,516,959 cps     | 1.5 %         |
| 138Ba (KED) | 47.843 ppb            | 3,334,255 cps     | 1.3 %         |
| 139La (KED) | 48.552 ppb            | 6,830,241 cps     | 1.3 %         |
| 140Ce (KED) | 48.852 ppb            | 8,721,631 cps     | 2.1 %         |
| 141Pr (KED) | 48.678 ppb            | 9,349,925 cps     | 1.4 %         |
| 142Nd (KED) | 47.807 ppb            | 3,633,305 cps     | 0.3 %         |
| 152Sm (KED) | 47.684 ppb            | 3,178,047 cps     | 1.6 %         |
| 153Eu (KED) | 47.881 ppb            | 6,359,755 cps     | 1.1 %         |
| 158Gd (KED) | 47.112 ppb            | 3,854,561 cps     | 0.9 %         |
| 159Tb (KED) | 228.006 %             | 6,008,112 cps     | 0.8 %         |
| 164Dy (KED) | 47.669 ppb            | 4,503,702 cps     | 0.6 %         |
| 166Er (KED) | 49.387 ppb            | 5,477,005 cps     | 0.7 %         |
| 169Tm (KED) | 48.468 ppb            | 17,759,661 cps    | 0.7 %         |
| 174Yb (KED) | 48.368 ppb            | 6,127,925 cps     | 0.2 %         |
| 175Lu (KED) | 48.544 ppb            | 11,861,241 cps    | 1.5 %         |
| 205Tl (KED) | 47.189 ppb            | 11,038,013 cps    | 1.7 %         |
| 208Pb (KED) | 47.526 ppb            | 8,134,700 cps     | 2.3 %         |
| 209Bi (KED) | 215.386 %             | 4,806,628 cps     | 2.3 %         |
| 232Th (KED) | 48.510 ppb            | 16,967,533 cps    | 1.3 %         |
| 238U (KED)  | 48.124 ppb            | 18,503,581 cps    | 0.8 %         |

## Sample Summary

Instrument ID: iCAP Q

Analysis index: 6

Analysis name: 100+20

Analysis started at: 10/14/2021 11:30:02 AM

User name: WINDOWS-UPCI4ER\Administrator

| Category    | Concentration average | Concentration RSD |
|-------------|-----------------------|-------------------|
| 6Li (KED)   | 184.465 %             |                   |
| 9Be (KED)   | 99.702 ppb            | 0.5 %             |
| 11B (KED)   | 103.661 ppb           | 1.7 %             |
| 24Mg (KED)  | 99.718 ppb            | 0.3 %             |
| 27Al (KED)  | 100.107 ppb           | 1.7 %             |
| 45Sc (KED)  | 195.469 %             |                   |
| 51V (KED)   | 100.836 ppb           | 0.6 %             |
| 52Cr (KED)  | 100.886 ppb           | 0.7 %             |
| 55Mn (KED)  | 100.891 ppb           | 1.4 %             |
| 56Fe (KED)  | 100.546 ppb           | 0.7 %             |
| 58Ni (KED)  | 100.534 ppb           | 0.0 %             |
| 59Co (KED)  | 100.587 ppb           | 0.6 %             |
| 63Cu (KED)  | 100.206 ppb           | 0.3 %             |
| 64Zn (KED)  | 100.753 ppb           | 0.7 %             |
| 69Ga (KED)  | 100.433 ppb           | 2.1 %             |
| 75As (KED)  | 100.905 ppb           | 0.5 %             |
| 80Se (KED)  | 102.737 ppb           | 1.1 %             |
| 85Rb (KED)  | 101.277 ppb           | 2.0 %             |
| 88Sr (KED)  | 100.652 ppb           | 0.7 %             |
| 89Y (KED)   | 196.924 %             |                   |
| 107Ag (KED) | 101.324 ppb           | 1.0 %             |
| 114Cd (KED) | 100.720 ppb           | 2.4 %             |
| 115In (KED) | 193.398 %             |                   |
| 133Cs (KED) | 102.119 ppb           | 0.9 %             |
| 138Ba (KED) | 101.329 ppb           | 0.7 %             |
| 139La (KED) | 100.924 ppb           | 2.3 %             |
| 140Ce (KED) | 100.795 ppb           | 2.2 %             |
| 141Pr (KED) | 100.863 ppb           | 2.1 %             |
| 142Nd (KED) | 101.293 ppb           | 0.8 %             |
| 152Sm (KED) | 101.423 ppb           | 1.0 %             |
| 153Eu (KED) | 101.254 ppb           | 1.6 %             |
| 158Gd (KED) | 101.595 ppb           | 2.6 %             |
| 159Tb (KED) | 201.119 %             |                   |
| 164Dy (KED) | 101.333 ppb           | 1.0 %             |
| 166Er (KED) | 100.492 ppb           | 0.8 %             |
| 169Tm (KED) | 100.877 ppb           | 1.3 %             |
| 174Yb (KED) | 101.050 ppb           | 1.8 %             |
| 175Lu (KED) | 100.820 ppb           | 1.8 %             |
| 205Tl (KED) | 101.895 ppb           | 0.9 %             |
| 208Pb (KED) | 101.590 ppb           | 2.2 %             |
| 209Bi (KED) | 189.400 %             |                   |
| 232Th (KED) | 100.797 ppb           | 1.1 %             |
| 238U (KED)  | 101.035 ppb           | 2.2 %             |

| Category   | Concentration average | Intensity average | Intensity RSD |
|------------|-----------------------|-------------------|---------------|
| 6Li (KED)  | 184.465 %             | 3,849 cps         | 1.6 %         |
| 9Be (KED)  | 99.702 ppb            | 22,284 cps        | 1.2 %         |
| 11B (KED)  | 103.661 ppb           | 13,022 cps        | 1.9 %         |
| 24Mg (KED) | 99.718 ppb            | 89,185 cps        | 1.9 %         |
| 27Al (KED) | 100.107 ppb           | 27,337 cps        | 0.9 %         |

| Category    | Concentration average | Intensity average | Intensity RSD |
|-------------|-----------------------|-------------------|---------------|
| 45Sc (KED)  | 195.469 %             | 83,709 cps        | 1.4 %         |
| 51V (KED)   | 100.836 ppb           | 1,330,292 cps     | 1.1 %         |
| 52Cr (KED)  | 100.886 ppb           | 2,034,056 cps     | 2.1 %         |
| 55Mn (KED)  | 100.891 ppb           | 1,150,326 cps     | 1.8 %         |
| 56Fe (KED)  | 100.546 ppb           | 1,897,324 cps     | 2.1 %         |
| 58Ni (KED)  | 100.534 ppb           | 2,246,693 cps     | 1.5 %         |
| 59Co (KED)  | 100.587 ppb           | 3,698,806 cps     | 1.0 %         |
| 63Cu (KED)  | 100.206 ppb           | 2,700,253 cps     | 1.8 %         |
| 64Zn (KED)  | 100.753 ppb           | 880,921 cps       | 2.3 %         |
| 69Ga (KED)  | 100.433 ppb           | 1,093,693 cps     | 1.8 %         |
| 75As (KED)  | 100.905 ppb           | 249,312 cps       | 1.7 %         |
| 80Se (KED)  | 102.737 ppb           | 89,704 cps        | 0.7 %         |
| 85Rb (KED)  | 101.277 ppb           | 1,029,507 cps     | 0.4 %         |
| 88Sr (KED)  | 100.652 ppb           | 1,499,432 cps     | 1.8 %         |
| 89Y (KED)   | 196.924 %             | 699,802 cps       | 1.6 %         |
| 107Ag (KED) | 101.324 ppb           | 6,816,770 cps     | 0.8 %         |
| 114Cd (KED) | 100.720 ppb           | 2,860,013 cps     | 2.1 %         |
| 115In (KED) | 193.398 %             | 1,227,081 cps     | 1.2 %         |
| 133Cs (KED) | 102.119 ppb           | 4,863,463 cps     | 1.8 %         |
| 138Ba (KED) | 101.329 ppb           | 6,228,238 cps     | 0.8 %         |
| 139La (KED) | 100.924 ppb           | 12,523,194 cps    | 2.1 %         |
| 140Ce (KED) | 100.795 ppb           | 15,874,635 cps    | 2.1 %         |
| 141Pr (KED) | 100.863 ppb           | 17,091,446 cps    | 2.3 %         |
| 142Nd (KED) | 101.293 ppb           | 6,790,449 cps     | 0.6 %         |
| 152Sm (KED) | 101.423 ppb           | 5,962,893 cps     | 0.9 %         |
| 153Eu (KED) | 101.254 ppb           | 11,863,838 cps    | 2.2 %         |
| 158Gd (KED) | 101.595 ppb           | 7,333,079 cps     | 3.2 %         |
| 159Tb (KED) | 201.119 %             | 5,299,628 cps     | 0.6 %         |
| 164Dy (KED) | 101.333 ppb           | 8,445,295 cps     | 0.8 %         |
| 166Er (KED) | 100.492 ppb           | 9,829,880 cps     | 0.8 %         |
| 169Tm (KED) | 100.877 ppb           | 32,606,946 cps    | 1.9 %         |
| 174Yb (KED) | 101.050 ppb           | 11,292,291 cps    | 1.3 %         |
| 175Lu (KED) | 100.820 ppb           | 21,703,892 cps    | 1.8 %         |
| 205Tl (KED) | 101.895 ppb           | 20,970,505 cps    | 1.0 %         |
| 208Pb (KED) | 101.590 ppb           | 15,286,518 cps    | 1.7 %         |
| 209Bi (KED) | 189.400 %             | 4,226,728 cps     | 0.7 %         |
| 232Th (KED) | 100.797 ppb           | 31,017,956 cps    | 0.8 %         |
| 238U (KED)  | 101.035 ppb           | 34,174,684 cps    | 1.8 %         |

## Sample Summary

Instrument ID: iCAP Q

Analysis index: 7

Analysis name: 2242jian

Analysis started at: 10/14/2021 11:33:57 AM

User name: WINDOWS-UPCI4ER\Administrator

| Category    | Concentration average | Concentration RSD |
|-------------|-----------------------|-------------------|
| 6Li (KED)   | 160.498 %             | 2.4 %             |
| 9Be (KED)   | 0.102 ppb             | 70.2 %            |
| 11B (KED)   | -2.641 ppb            | 28.3 %            |
| 24Mg (KED)  | 128.373 ppb           | 2.0 %             |
| 27Al (KED)  | 73.397 ppb            | 0.7 %             |
| 45Sc (KED)  | 169.959 %             | 1.4 %             |
| 51V (KED)   | 0.169 ppb             | 16.5 %            |
| 52Cr (KED)  | 0.597 ppb             | 4.8 %             |
| 55Mn (KED)  | 2.956 ppb             | 2.0 %             |
| 56Fe (KED)  | 89.895 ppb            | 0.8 %             |
| 58Ni (KED)  | 0.668 ppb             | 1.2 %             |
| 59Co (KED)  | 0.053 ppb             | 25.4 %            |
| 63Cu (KED)  | 2.418 ppb             | 2.4 %             |
| 64Zn (KED)  | 57.058 ppb            | 1.3 %             |
| 69Ga (KED)  | 0.397 ppb             | 2.6 %             |
| 75As (KED)  | 0.073 ppb             | 19.2 %            |
| 80Se (KED)  | -3.180 ppb            | 7.3 %             |
| 85Rb (KED)  | 1.541 ppb             | 1.7 %             |
| 88Sr (KED)  | 1.727 ppb             | 0.0 %             |
| 89Y (KED)   | 170.716 %             | 0.9 %             |
| 107Ag (KED) | 0.153 ppb             | 10.7 %            |
| 114Cd (KED) | 0.016 ppb             | 17.4 %            |
| 115In (KED) | 169.092 %             | 1.9 %             |
| 133Cs (KED) | 0.019 ppb             | 20.1 %            |
| 138Ba (KED) | 1.350 ppb             | 1.5 %             |
| 139La (KED) | 0.082 ppb             | 4.1 %             |
| 140Ce (KED) | 0.442 ppb             | 1.2 %             |
| 141Pr (KED) | 0.021 ppb             | 7.0 %             |
| 142Nd (KED) | 0.189 ppb             | 2.0 %             |
| 152Sm (KED) | 0.014 ppb             | 6.4 %             |
| 153Eu (KED) | 0.004 ppb             | 19.3 %            |
| 158Gd (KED) | 0.013 ppb             | 13.8 %            |
| 159Tb (KED) | 185.861 %             | 1.3 %             |
| 164Dy (KED) | 0.009 ppb             | 4.4 %             |
| 166Er (KED) | 0.013 ppb             | 2.6 %             |
| 169Tm (KED) | 0.002 ppb             | 27.6 %            |
| 174Yb (KED) | 0.004 ppb             | 4.3 %             |
| 175Lu (KED) | -0.016 ppb            | 16.5 %            |
| 205Tl (KED) | 0.008 ppb             | 11.8 %            |
| 208Pb (KED) | 0.202 ppb             | 4.4 %             |
| 209Bi (KED) | 167.178 %             | 1.3 %             |
| 232Th (KED) | 0.113 ppb             | 51.4 %            |
| 238U (KED)  | 0.009 ppb             | 15.9 %            |

| Category   | Concentration average | Intensity average | Intensity RSD |
|------------|-----------------------|-------------------|---------------|
| 6Li (KED)  | 160.498 %             | 3,349 cps         | 2.4 %         |
| 9Be (KED)  | 0.102 ppb             | 20 cps            | 72.6 %        |
| 11B (KED)  | -2.641 ppb            | 1,021 cps         | 7.2 %         |
| 24Mg (KED) | 128.373 ppb           | 99,815 cps        | 0.6 %         |
| 27Al (KED) | 73.397 ppb            | 17,467 cps        | 2.1 %         |

| Category    | Concentration average | Intensity average | Intensity RSD |
|-------------|-----------------------|-------------------|---------------|
| 45Sc (KED)  | 169.959 %             | 72,784 cps        | 1.4 %         |
| 51V (KED)   | 0.169 ppb             | 1,940 cps         | 17.7 %        |
| 52Cr (KED)  | 0.597 ppb             | 10,700 cps        | 5.7 %         |
| 55Mn (KED)  | 2.956 ppb             | 29,517 cps        | 0.8 %         |
| 56Fe (KED)  | 89.895 ppb            | 1,475,170 cps     | 0.5 %         |
| 58Ni (KED)  | 0.668 ppb             | 13,396 cps        | 0.9 %         |
| 59Co (KED)  | 0.053 ppb             | 1,758 cps         | 25.8 %        |
| 63Cu (KED)  | 2.418 ppb             | 57,067 cps        | 2.4 %         |
| 64Zn (KED)  | 57.058 ppb            | 433,034 cps       | 1.2 %         |
| 69Ga (KED)  | 0.397 ppb             | 3,811 cps         | 2.4 %         |
| 75As (KED)  | 0.073 ppb             | 174 cps           | 16.3 %        |
| 80Se (KED)  | -3.180 ppb            | 3,078 cps         | 5.9 %         |
| 85Rb (KED)  | 1.541 ppb             | 13,617 cps        | 0.9 %         |
| 88Sr (KED)  | 1.727 ppb             | 22,426 cps        | 0.8 %         |
| 89Y (KED)   | 170.716 %             | 606,667 cps       | 0.9 %         |
| 107Ag (KED) | 0.153 ppb             | 9,030 cps         | 10.8 %        |
| 114Cd (KED) | 0.016 ppb             | 470 cps           | 12.9 %        |
| 115In (KED) | 169.092 %             | 1,072,865 cps     | 1.9 %         |
| 133Cs (KED) | 0.019 ppb             | 828 cps           | 18.8 %        |
| 138Ba (KED) | 1.350 ppb             | 77,903 cps        | 1.7 %         |
| 139La (KED) | 0.082 ppb             | 9,435 cps         | 2.9 %         |
| 140Ce (KED) | 0.442 ppb             | 64,484 cps        | 2.2 %         |
| 141Pr (KED) | 0.021 ppb             | 3,229 cps         | 6.2 %         |
| 142Nd (KED) | 0.189 ppb             | 11,738 cps        | 1.1 %         |
| 152Sm (KED) | 0.014 ppb             | 752 cps           | 5.2 %         |
| 153Eu (KED) | 0.004 ppb             | 451 cps           | 18.6 %        |
| 158Gd (KED) | 0.013 ppb             | 896 cps           | 13.4 %        |
| 159Tb (KED) | 185.861 %             | 4,897,551 cps     | 1.3 %         |
| 164Dy (KED) | 0.009 ppb             | 734 cps           | 4.4 %         |
| 166Er (KED) | 0.013 ppb             | 1,632 cps         | 2.5 %         |
| 169Tm (KED) | 0.002 ppb             | 522 cps           | 25.4 %        |
| 174Yb (KED) | 0.004 ppb             | 444 cps           | 3.4 %         |
| 175Lu (KED) | -0.016 ppb            | 20,035 cps        | 1.4 %         |
| 205Tl (KED) | 0.008 ppb             | 1,529 cps         | 10.3 %        |
| 208Pb (KED) | 0.202 ppb             | 33,153 cps        | 3.0 %         |
| 209Bi (KED) | 167.178 %             | 3,730,804 cps     | 1.3 %         |
| 232Th (KED) | 0.113 ppb             | 30,505 cps        | 50.1 %        |
| 238U (KED)  | 0.009 ppb             | 2,805 cps         | 15.5 %        |

## Sample Summary

Instrument ID: iCAP Q

Analysis index: 8

Analysis name: 3402jian

Analysis started at: 10/14/2021 11:38:01 AM

User name: WINDOWS-UPCI4ER\Administrator

| Category    | Concentration average | Concentration RSD |
|-------------|-----------------------|-------------------|
| 6Li (KED)   | 174.984 %             | 2.1 %             |
| 9Be (KED)   | 0.016 ppb             | 101.4 %           |
| 11B (KED)   | 2.705 ppb             | 16.9 %            |
| 24Mg (KED)  | 168.640 ppb           | 1.4 %             |
| 27Al (KED)  | 94.485 ppb            | 2.1 %             |
| 45Sc (KED)  | 178.072 %             | 2.2 %             |
| 51V (KED)   | 0.197 ppb             | 1.4 %             |
| 52Cr (KED)  | 0.695 ppb             | 0.8 %             |
| 55Mn (KED)  | 4.069 ppb             | 0.6 %             |
| 56Fe (KED)  | 123.079 ppb           | 1.6 %             |
| 58Ni (KED)  | 0.835 ppb             | 2.3 %             |
| 59Co (KED)  | 0.052 ppb             | 0.7 %             |
| 63Cu (KED)  | 1.723 ppb             | 1.6 %             |
| 64Zn (KED)  | 50.596 ppb            | 1.7 %             |
| 69Ga (KED)  | 0.477 ppb             | 2.6 %             |
| 75As (KED)  | 0.131 ppb             | 9.7 %             |
| 80Se (KED)  | -3.352 ppb            | 1.9 %             |
| 85Rb (KED)  | 1.545 ppb             | 2.3 %             |
| 88Sr (KED)  | 2.234 ppb             | 0.8 %             |
| 89Y (KED)   | 179.913 %             | 1.5 %             |
| 107Ag (KED) | 0.050 ppb             | 9.8 %             |
| 114Cd (KED) | 0.018 ppb             | 6.4 %             |
| 115In (KED) | 177.216 %             | 2.1 %             |
| 133Cs (KED) | 0.030 ppb             | 4.1 %             |
| 138Ba (KED) | 1.712 ppb             | 0.9 %             |
| 139La (KED) | 0.100 ppb             | 1.7 %             |
| 140Ce (KED) | 0.254 ppb             | 1.0 %             |
| 141Pr (KED) | 0.025 ppb             | 2.2 %             |
| 142Nd (KED) | 0.145 ppb             | 4.7 %             |
| 152Sm (KED) | 0.017 ppb             | 11.0 %            |
| 153Eu (KED) | 0.004 ppb             | 2.1 %             |
| 158Gd (KED) | 0.016 ppb             | 5.0 %             |
| 159Tb (KED) | 189.162 %             | 1.2 %             |
| 164Dy (KED) | 0.010 ppb             | 14.4 %            |
| 166Er (KED) | 0.006 ppb             | 23.5 %            |
| 169Tm (KED) | 0.001 ppb             | 1.7 %             |
| 174Yb (KED) | 0.004 ppb             | 12.2 %            |
| 175Lu (KED) | -0.013 ppb            | 9.5 %             |
| 205Tl (KED) | 0.006 ppb             | 7.7 %             |
| 208Pb (KED) | 0.239 ppb             | 2.1 %             |
| 209Bi (KED) | 174.342 %             | 1.7 %             |
| 232Th (KED) | 0.039 ppb             | 3.8 %             |
| 238U (KED)  | 0.007 ppb             | 5.1 %             |

| Category   | Concentration average | Intensity average | Intensity RSD |
|------------|-----------------------|-------------------|---------------|
| 6Li (KED)  | 174.984 %             | 3,652 cps         | 2.1 %         |
| 9Be (KED)  | 0.016 ppb             | 3 cps             | 100.0 %       |
| 11B (KED)  | 2.705 ppb             | 1,679 cps         | 4.3 %         |
| 24Mg (KED) | 168.640 ppb           | 142,924 cps       | 1.1 %         |
| 27Al (KED) | 94.485 ppb            | 23,510 cps        | 1.0 %         |

| Category    | Concentration average | Intensity average | Intensity RSD |
|-------------|-----------------------|-------------------|---------------|
| 45Sc (KED)  | 178.072 %             | 76,258 cps        | 2.2 %         |
| 51V (KED)   | 0.197 ppb             | 2,369 cps         | 3.5 %         |
| 52Cr (KED)  | 0.695 ppb             | 13,001 cps        | 3.0 %         |
| 55Mn (KED)  | 4.069 ppb             | 42,501 cps        | 2.6 %         |
| 56Fe (KED)  | 123.079 ppb           | 2,114,227 cps     | 0.8 %         |
| 58Ni (KED)  | 0.835 ppb             | 17,433 cps        | 3.6 %         |
| 59Co (KED)  | 0.052 ppb             | 1,787 cps         | 1.9 %         |
| 63Cu (KED)  | 1.723 ppb             | 43,030 cps        | 1.1 %         |
| 64Zn (KED)  | 50.596 ppb            | 404,809 cps       | 1.3 %         |
| 69Ga (KED)  | 0.477 ppb             | 4,808 cps         | 1.4 %         |
| 75As (KED)  | 0.131 ppb             | 316 cps           | 7.8 %         |
| 80Se (KED)  | -3.352 ppb            | 3,115 cps         | 0.4 %         |
| 85Rb (KED)  | 1.545 ppb             | 14,397 cps        | 3.6 %         |
| 88Sr (KED)  | 2.234 ppb             | 30,526 cps        | 2.0 %         |
| 89Y (KED)   | 179.913 %             | 639,349 cps       | 1.5 %         |
| 107Ag (KED) | 0.050 ppb             | 3,114 cps         | 8.7 %         |
| 114Cd (KED) | 0.018 ppb             | 537 cps           | 3.8 %         |
| 115In (KED) | 177.216 %             | 1,124,409 cps     | 2.1 %         |
| 133Cs (KED) | 0.030 ppb             | 1,349 cps         | 5.6 %         |
| 138Ba (KED) | 1.712 ppb             | 100,234 cps       | 2.0 %         |
| 139La (KED) | 0.100 ppb             | 11,716 cps        | 2.2 %         |
| 140Ce (KED) | 0.254 ppb             | 37,871 cps        | 0.5 %         |
| 141Pr (KED) | 0.025 ppb             | 3,963 cps         | 2.2 %         |
| 142Nd (KED) | 0.145 ppb             | 9,160 cps         | 4.6 %         |
| 152Sm (KED) | 0.017 ppb             | 931 cps           | 12.1 %        |
| 153Eu (KED) | 0.004 ppb             | 418 cps           | 2.8 %         |
| 158Gd (KED) | 0.016 ppb             | 1,084 cps         | 4.4 %         |
| 159Tb (KED) | 189.162 %             | 4,984,539 cps     | 1.2 %         |
| 164Dy (KED) | 0.010 ppb             | 830 cps           | 14.7 %        |
| 166Er (KED) | 0.006 ppb             | 983 cps           | 13.8 %        |
| 169Tm (KED) | 0.001 ppb             | 254 cps           | 2.7 %         |
| 174Yb (KED) | 0.004 ppb             | 476 cps           | 11.8 %        |
| 175Lu (KED) | -0.013 ppb            | 21,153 cps        | 2.2 %         |
| 205Tl (KED) | 0.006 ppb             | 1,080 cps         | 5.9 %         |
| 208Pb (KED) | 0.239 ppb             | 39,728 cps        | 1.4 %         |
| 209Bi (KED) | 174.342 %             | 3,890,671 cps     | 1.7 %         |
| 232Th (KED) | 0.039 ppb             | 11,023 cps        | 2.8 %         |
| 238U (KED)  | 0.007 ppb             | 2,338 cps         | 3.4 %         |

## Sample Summary

Instrument ID: iCAP Q

Analysis index: 9

Analysis name: 3483jian

Analysis started at: 10/14/2021 11:42:03 AM

User name: WINDOWS-UPCI4ER\Administrator

| Category    | Concentration average | Concentration RSD |
|-------------|-----------------------|-------------------|
| 6Li (KED)   | 188.992 %             | 0.9 %             |
| 9Be (KED)   | 0.019 ppb             | 115.0 %           |
| 11B (KED)   | -2.088 ppb            | 13.5 %            |
| 24Mg (KED)  | 219.234 ppb           | 1.3 %             |
| 27Al (KED)  | 178.203 ppb           | 0.8 %             |
| 45Sc (KED)  | 187.755 %             | 1.0 %             |
| 51V (KED)   | 0.353 ppb             | 2.1 %             |
| 52Cr (KED)  | 0.672 ppb             | 3.6 %             |
| 55Mn (KED)  | 6.580 ppb             | 1.7 %             |
| 56Fe (KED)  | 191.862 ppb           | 0.2 %             |
| 58Ni (KED)  | 1.236 ppb             | 2.0 %             |
| 59Co (KED)  | 0.079 ppb             | 6.3 %             |
| 63Cu (KED)  | 2.389 ppb             | 0.7 %             |
| 64Zn (KED)  | 56.208 ppb            | 1.6 %             |
| 69Ga (KED)  | 0.759 ppb             | 0.7 %             |
| 75As (KED)  | 0.124 ppb             | 30.9 %            |
| 80Se (KED)  | -3.391 ppb            | 6.8 %             |
| 85Rb (KED)  | 1.742 ppb             | 2.2 %             |
| 88Sr (KED)  | 3.643 ppb             | 3.0 %             |
| 89Y (KED)   | 182.424 %             | 1.0 %             |
| 107Ag (KED) | 0.037 ppb             | 6.8 %             |
| 114Cd (KED) | 0.019 ppb             | 5.3 %             |
| 115In (KED) | 175.915 %             | 2.1 %             |
| 133Cs (KED) | 0.036 ppb             | 11.4 %            |
| 138Ba (KED) | 2.795 ppb             | 1.2 %             |
| 139La (KED) | 0.190 ppb             | 2.2 %             |
| 140Ce (KED) | 0.477 ppb             | 5.1 %             |
| 141Pr (KED) | 0.045 ppb             | 2.8 %             |
| 142Nd (KED) | 0.270 ppb             | 2.0 %             |
| 152Sm (KED) | 0.029 ppb             | 4.5 %             |
| 153Eu (KED) | 0.006 ppb             | 4.1 %             |
| 158Gd (KED) | 0.025 ppb             | 4.4 %             |
| 159Tb (KED) | 189.073 %             | 1.6 %             |
| 164Dy (KED) | 0.018 ppb             | 3.0 %             |
| 166Er (KED) | 0.011 ppb             | 20.1 %            |
| 169Tm (KED) | 0.001 ppb             | 6.2 %             |
| 174Yb (KED) | 0.007 ppb             | 5.0 %             |
| 175Lu (KED) | -0.011 ppb            | 44.1 %            |
| 205Tl (KED) | 0.006 ppb             | 6.1 %             |
| 208Pb (KED) | 0.282 ppb             | 2.2 %             |
| 209Bi (KED) | 173.556 %             | 2.4 %             |
| 232Th (KED) | 0.053 ppb             | 1.9 %             |
| 238U (KED)  | 0.012 ppb             | 8.9 %             |

| Category   | Concentration average | Intensity average | Intensity RSD |
|------------|-----------------------|-------------------|---------------|
| 6Li (KED)  | 188.992 %             | 3,944 cps         | 0.9 %         |
| 9Be (KED)  | 0.019 ppb             | 4 cps             | 114.6 %       |
| 11B (KED)  | -2.088 ppb            | 1,266 cps         | 2.4 %         |
| 24Mg (KED) | 219.234 ppb           | 200,642 cps       | 1.0 %         |
| 27Al (KED) | 178.203 ppb           | 46,632 cps        | 1.2 %         |

| Category    | Concentration average | Intensity average | Intensity RSD |
|-------------|-----------------------|-------------------|---------------|
| 45Sc (KED)  | 187.755 %             | 80,405 cps        | 1.0 %         |
| 51V (KED)   | 0.353 ppb             | 4,480 cps         | 1.2 %         |
| 52Cr (KED)  | 0.672 ppb             | 13,259 cps        | 4.2 %         |
| 55Mn (KED)  | 6.580 ppb             | 72,298 cps        | 1.3 %         |
| 56Fe (KED)  | 191.862 ppb           | 3,473,385 cps     | 1.2 %         |
| 58Ni (KED)  | 1.236 ppb             | 26,994 cps        | 2.9 %         |
| 59Co (KED)  | 0.079 ppb             | 2,863 cps         | 6.5 %         |
| 63Cu (KED)  | 2.389 ppb             | 60,276 cps        | 1.7 %         |
| 64Zn (KED)  | 56.208 ppb            | 455,881 cps       | 1.9 %         |
| 69Ga (KED)  | 0.759 ppb             | 7,722 cps         | 1.6 %         |
| 75As (KED)  | 0.124 ppb             | 303 cps           | 29.7 %        |
| 80Se (KED)  | -3.391 ppb            | 3,130 cps         | 6.5 %         |
| 85Rb (KED)  | 1.742 ppb             | 16,451 cps        | 1.4 %         |
| 88Sr (KED)  | 3.643 ppb             | 50,405 cps        | 3.9 %         |
| 89Y (KED)   | 182.424 %             | 648,273 cps       | 1.0 %         |
| 107Ag (KED) | 0.037 ppb             | 2,328 cps         | 6.6 %         |
| 114Cd (KED) | 0.019 ppb             | 579 cps           | 6.7 %         |
| 115In (KED) | 175.915 %             | 1,116,153 cps     | 2.1 %         |
| 133Cs (KED) | 0.036 ppb             | 1,583 cps         | 10.2 %        |
| 138Ba (KED) | 2.795 ppb             | 162,745 cps       | 0.5 %         |
| 139La (KED) | 0.190 ppb             | 22,201 cps        | 0.6 %         |
| 140Ce (KED) | 0.477 ppb             | 70,762 cps        | 4.3 %         |
| 141Pr (KED) | 0.045 ppb             | 7,106 cps         | 1.2 %         |
| 142Nd (KED) | 0.270 ppb             | 17,018 cps        | 1.6 %         |
| 152Sm (KED) | 0.029 ppb             | 1,610 cps         | 3.7 %         |
| 153Eu (KED) | 0.006 ppb             | 694 cps           | 5.7 %         |
| 158Gd (KED) | 0.025 ppb             | 1,708 cps         | 5.2 %         |
| 159Tb (KED) | 189.073 %             | 4,982,205 cps     | 1.6 %         |
| 164Dy (KED) | 0.018 ppb             | 1,428 cps         | 1.4 %         |
| 166Er (KED) | 0.011 ppb             | 1,418 cps         | 15.6 %        |
| 169Tm (KED) | 0.001 ppb             | 372 cps           | 4.9 %         |
| 174Yb (KED) | 0.007 ppb             | 771 cps           | 4.4 %         |
| 175Lu (KED) | -0.011 ppb            | 21,381 cps        | 3.5 %         |
| 205Tl (KED) | 0.006 ppb             | 1,198 cps         | 5.6 %         |
| 208Pb (KED) | 0.282 ppb             | 45,361 cps        | 1.0 %         |
| 209Bi (KED) | 173.556 %             | 3,873,129 cps     | 2.4 %         |
| 232Th (KED) | 0.053 ppb             | 14,916 cps        | 0.6 %         |
| 238U (KED)  | 0.012 ppb             | 3,885 cps         | 8.0 %         |

## Sample Summary

Instrument ID: iCAP Q

Analysis index: 10

Analysis name: 2650jian

Analysis started at: 10/14/2021 11:46:23 AM

User name: WINDOWS-UPCI4ER\Administrator

| Category    | Concentration average | Concentration RSD |
|-------------|-----------------------|-------------------|
| 6Li (KED)   | 188.033 %             | 3.8 %             |
| 9Be (KED)   | 0.019 ppb             | 86.6 %            |
| 11B (KED)   | 0.372 ppb             | 306.6 %           |
| 24Mg (KED)  | 159.568 ppb           | 4.2 %             |
| 27Al (KED)  | 92.452 ppb            | 2.4 %             |
| 45Sc (KED)  | 186.966 %             | 1.1 %             |
| 51V (KED)   | 0.206 ppb             | 2.7 %             |
| 52Cr (KED)  | 1.115 ppb             | 1.8 %             |
| 55Mn (KED)  | 4.515 ppb             | 1.0 %             |
| 56Fe (KED)  | 120.688 ppb           | 1.7 %             |
| 58Ni (KED)  | 0.795 ppb             | 3.2 %             |
| 59Co (KED)  | 0.064 ppb             | 5.7 %             |
| 63Cu (KED)  | 2.288 ppb             | 3.9 %             |
| 64Zn (KED)  | 51.816 ppb            | 3.0 %             |
| 69Ga (KED)  | 0.526 ppb             | 3.1 %             |
| 75As (KED)  | 0.089 ppb             | 8.5 %             |
| 80Se (KED)  | -3.256 ppb            | 9.5 %             |
| 85Rb (KED)  | 1.229 ppb             | 1.0 %             |
| 88Sr (KED)  | 2.273 ppb             | 3.2 %             |
| 89Y (KED)   | 182.851 %             | 2.1 %             |
| 107Ag (KED) | 0.056 ppb             | 2.6 %             |
| 114Cd (KED) | 0.027 ppb             | 6.1 %             |
| 115In (KED) | 174.885 %             | 0.7 %             |
| 133Cs (KED) | 0.021 ppb             | 5.1 %             |
| 138Ba (KED) | 1.812 ppb             | 2.3 %             |
| 139La (KED) | 0.094 ppb             | 2.3 %             |
| 140Ce (KED) | 0.283 ppb             | 16.4 %            |
| 141Pr (KED) | 0.022 ppb             | 4.2 %             |
| 142Nd (KED) | 0.144 ppb             | 4.1 %             |
| 152Sm (KED) | 0.016 ppb             | 6.8 %             |
| 153Eu (KED) | 0.003 ppb             | 4.3 %             |
| 158Gd (KED) | 0.015 ppb             | 6.8 %             |
| 159Tb (KED) | 189.041 %             | 1.5 %             |
| 164Dy (KED) | 0.011 ppb             | 3.8 %             |
| 166Er (KED) | 0.006 ppb             | 10.5 %            |
| 169Tm (KED) | 0.001 ppb             | 10.3 %            |
| 174Yb (KED) | 0.004 ppb             | 1.8 %             |
| 175Lu (KED) | -0.010 ppb            | 13.4 %            |
| 205Tl (KED) | 0.005 ppb             | 3.0 %             |
| 208Pb (KED) | 0.285 ppb             | 2.1 %             |
| 209Bi (KED) | 168.547 %             | 0.9 %             |
| 232Th (KED) | 0.032 ppb             | 2.0 %             |
| 238U (KED)  | 0.007 ppb             | 4.7 %             |

| Category   | Concentration average | Intensity average | Intensity RSD |
|------------|-----------------------|-------------------|---------------|
| 6Li (KED)  | 188.033 %             | 3,924 cps         | 3.8 %         |
| 9Be (KED)  | 0.019 ppb             | 4 cps             | 86.6 %        |
| 11B (KED)  | 0.372 ppb             | 1,536 cps         | 4.6 %         |
| 24Mg (KED) | 159.568 ppb           | 145,230 cps       | 2.6 %         |
| 27Al (KED) | 92.452 ppb            | 24,159 cps        | 1.3 %         |

| Category    | Concentration average | Intensity average | Intensity RSD |
|-------------|-----------------------|-------------------|---------------|
| 45Sc (KED)  | 186.966 %             | 80,067 cps        | 1.1 %         |
| 51V (KED)   | 0.206 ppb             | 2,597 cps         | 1.7 %         |
| 52Cr (KED)  | 1.115 ppb             | 21,746 cps        | 0.9 %         |
| 55Mn (KED)  | 4.515 ppb             | 49,479 cps        | 0.8 %         |
| 56Fe (KED)  | 120.688 ppb           | 2,177,123 cps     | 1.3 %         |
| 58Ni (KED)  | 0.795 ppb             | 17,463 cps        | 2.2 %         |
| 59Co (KED)  | 0.064 ppb             | 2,312 cps         | 5.0 %         |
| 63Cu (KED)  | 2.288 ppb             | 57,851 cps        | 1.9 %         |
| 64Zn (KED)  | 51.816 ppb            | 421,197 cps       | 1.4 %         |
| 69Ga (KED)  | 0.526 ppb             | 5,380 cps         | 1.5 %         |
| 75As (KED)  | 0.089 ppb             | 223 cps           | 6.5 %         |
| 80Se (KED)  | -3.256 ppb            | 3,236 cps         | 5.5 %         |
| 85Rb (KED)  | 1.229 ppb             | 11,643 cps        | 2.7 %         |
| 88Sr (KED)  | 2.273 ppb             | 31,564 cps        | 2.6 %         |
| 89Y (KED)   | 182.851 %             | 649,792 cps       | 2.1 %         |
| 107Ag (KED) | 0.056 ppb             | 3,439 cps         | 1.8 %         |
| 114Cd (KED) | 0.027 ppb             | 774 cps           | 4.8 %         |
| 115In (KED) | 174.885 %             | 1,109,619 cps     | 0.7 %         |
| 133Cs (KED) | 0.021 ppb             | 933 cps           | 5.7 %         |
| 138Ba (KED) | 1.812 ppb             | 105,939 cps       | 1.2 %         |
| 139La (KED) | 0.094 ppb             | 10,997 cps        | 1.1 %         |
| 140Ce (KED) | 0.283 ppb             | 42,070 cps        | 15.6 %        |
| 141Pr (KED) | 0.022 ppb             | 3,575 cps         | 4.6 %         |
| 142Nd (KED) | 0.144 ppb             | 9,096 cps         | 2.6 %         |
| 152Sm (KED) | 0.016 ppb             | 884 cps           | 6.1 %         |
| 153Eu (KED) | 0.003 ppb             | 376 cps           | 3.4 %         |
| 158Gd (KED) | 0.015 ppb             | 1,001 cps         | 7.9 %         |
| 159Tb (KED) | 189.041 %             | 4,981,365 cps     | 1.5 %         |
| 164Dy (KED) | 0.011 ppb             | 850 cps           | 3.4 %         |
| 166Er (KED) | 0.006 ppb             | 959 cps           | 4.4 %         |
| 169Tm (KED) | 0.001 ppb             | 221 cps           | 8.8 %         |
| 174Yb (KED) | 0.004 ppb             | 460 cps           | 3.2 %         |
| 175Lu (KED) | -0.010 ppb            | 21,665 cps        | 1.7 %         |
| 205Tl (KED) | 0.005 ppb             | 954 cps           | 2.1 %         |
| 208Pb (KED) | 0.285 ppb             | 44,493 cps        | 1.8 %         |
| 209Bi (KED) | 168.547 %             | 3,761,353 cps     | 0.9 %         |
| 232Th (KED) | 0.032 ppb             | 8,750 cps         | 1.1 %         |
| 238U (KED)  | 0.007 ppb             | 2,257 cps         | 4.4 %         |

## Sample Summary

Instrument ID: iCAP Q

Analysis index: 11

Analysis name: 3443jian

Analysis started at: 10/14/2021 11:50:38 AM

User name: WINDOWS-UPCI4ER\Administrator

| Category    | Concentration average | Concentration RSD |
|-------------|-----------------------|-------------------|
| 6Li (KED)   | 189.098 %             | 2.3 %             |
| 9Be (KED)   | 0.024 ppb             | 90.6 %            |
| 11B (KED)   | -1.838 ppb            | 54.4 %            |
| 24Mg (KED)  | 140.172 ppb           | 1.1 %             |
| 27Al (KED)  | 102.973 ppb           | 1.0 %             |
| 45Sc (KED)  | 188.342 %             | 0.8 %             |
| 51V (KED)   | 0.209 ppb             | 8.1 %             |
| 52Cr (KED)  | 0.860 ppb             | 1.3 %             |
| 55Mn (KED)  | 4.055 ppb             | 2.0 %             |
| 56Fe (KED)  | 111.525 ppb           | 0.9 %             |
| 58Ni (KED)  | 0.672 ppb             | 2.9 %             |
| 59Co (KED)  | 0.047 ppb             | 2.9 %             |
| 63Cu (KED)  | 1.810 ppb             | 0.6 %             |
| 64Zn (KED)  | 58.237 ppb            | 2.6 %             |
| 69Ga (KED)  | 0.521 ppb             | 2.1 %             |
| 75As (KED)  | 0.091 ppb             | 7.3 %             |
| 80Se (KED)  | -3.417 ppb            | 5.2 %             |
| 85Rb (KED)  | 1.025 ppb             | 0.3 %             |
| 88Sr (KED)  | 2.333 ppb             | 0.6 %             |
| 89Y (KED)   | 183.060 %             | 1.2 %             |
| 107Ag (KED) | 0.018 ppb             | 6.5 %             |
| 114Cd (KED) | 0.014 ppb             | 7.4 %             |
| 115In (KED) | 173.948 %             | 2.7 %             |
| 133Cs (KED) | 0.020 ppb             | 5.9 %             |
| 138Ba (KED) | 1.803 ppb             | 1.8 %             |
| 139La (KED) | 0.121 ppb             | 0.1 %             |
| 140Ce (KED) | 0.323 ppb             | 0.5 %             |
| 141Pr (KED) | 0.027 ppb             | 4.6 %             |
| 142Nd (KED) | 0.172 ppb             | 0.8 %             |
| 152Sm (KED) | 0.018 ppb             | 6.4 %             |
| 153Eu (KED) | 0.004 ppb             | 12.4 %            |
| 158Gd (KED) | 0.016 ppb             | 10.8 %            |
| 159Tb (KED) | 188.924 %             | 0.4 %             |
| 164Dy (KED) | 0.010 ppb             | 5.8 %             |
| 166Er (KED) | 0.007 ppb             | 12.3 %            |
| 169Tm (KED) | 0.001 ppb             | 20.6 %            |
| 174Yb (KED) | 0.004 ppb             | 5.0 %             |
| 175Lu (KED) | -0.014 ppb            | 9.7 %             |
| 205Tl (KED) | 0.004 ppb             | 9.2 %             |
| 208Pb (KED) | 0.243 ppb             | 0.9 %             |
| 209Bi (KED) | 171.544 %             | 0.8 %             |
| 232Th (KED) | 0.036 ppb             | 4.4 %             |
| 238U (KED)  | 0.008 ppb             | 4.2 %             |

| Category   | Concentration average | Intensity average | Intensity RSD |
|------------|-----------------------|-------------------|---------------|
| 6Li (KED)  | 189.098 %             | 3,946 cps         | 2.3 %         |
| 9Be (KED)  | 0.024 ppb             | 6 cps             | 91.7 %        |
| 11B (KED)  | -1.838 ppb            | 1,293 cps         | 6.7 %         |
| 24Mg (KED) | 140.172 ppb           | 128,412 cps       | 1.2 %         |
| 27Al (KED) | 102.973 ppb           | 27,094 cps        | 1.3 %         |

| Category    | Concentration average | Intensity average | Intensity RSD |
|-------------|-----------------------|-------------------|---------------|
| 45Sc (KED)  | 188.342 %             | 80,657 cps        | 0.8 %         |
| 51V (KED)   | 0.209 ppb             | 2,657 cps         | 8.8 %         |
| 52Cr (KED)  | 0.860 ppb             | 16,950 cps        | 2.0 %         |
| 55Mn (KED)  | 4.055 ppb             | 44,785 cps        | 1.2 %         |
| 56Fe (KED)  | 111.525 ppb           | 2,027,058 cps     | 0.1 %         |
| 58Ni (KED)  | 0.672 ppb             | 14,932 cps        | 2.2 %         |
| 59Co (KED)  | 0.047 ppb             | 1,733 cps         | 2.9 %         |
| 63Cu (KED)  | 1.810 ppb             | 45,971 cps        | 0.7 %         |
| 64Zn (KED)  | 58.237 ppb            | 473,827 cps       | 1.4 %         |
| 69Ga (KED)  | 0.521 ppb             | 5,337 cps         | 0.8 %         |
| 75As (KED)  | 0.091 ppb             | 229 cps           | 5.5 %         |
| 80Se (KED)  | -3.417 ppb            | 3,120 cps         | 3.9 %         |
| 85Rb (KED)  | 1.025 ppb             | 9,728 cps         | 1.0 %         |
| 88Sr (KED)  | 2.333 ppb             | 32,433 cps        | 1.7 %         |
| 89Y (KED)   | 183.060 %             | 650,533 cps       | 1.2 %         |
| 107Ag (KED) | 0.018 ppb             | 1,148 cps         | 7.7 %         |
| 114Cd (KED) | 0.014 ppb             | 439 cps           | 8.6 %         |
| 115In (KED) | 173.948 %             | 1,103,679 cps     | 2.7 %         |
| 133Cs (KED) | 0.020 ppb             | 877 cps           | 5.1 %         |
| 138Ba (KED) | 1.803 ppb             | 105,336 cps       | 1.7 %         |
| 139La (KED) | 0.121 ppb             | 14,158 cps        | 0.4 %         |
| 140Ce (KED) | 0.323 ppb             | 48,049 cps        | 0.9 %         |
| 141Pr (KED) | 0.027 ppb             | 4,310 cps         | 4.4 %         |
| 142Nd (KED) | 0.172 ppb             | 10,869 cps        | 0.6 %         |
| 152Sm (KED) | 0.018 ppb             | 977 cps           | 6.3 %         |
| 153Eu (KED) | 0.004 ppb             | 416 cps           | 12.7 %        |
| 158Gd (KED) | 0.016 ppb             | 1,094 cps         | 11.1 %        |
| 159Tb (KED) | 188.924 %             | 4,978,284 cps     | 0.4 %         |
| 164Dy (KED) | 0.010 ppb             | 829 cps           | 5.9 %         |
| 166Er (KED) | 0.007 ppb             | 1,038 cps         | 7.3 %         |
| 169Tm (KED) | 0.001 ppb             | 223 cps           | 18.2 %        |
| 174Yb (KED) | 0.004 ppb             | 451 cps           | 4.5 %         |
| 175Lu (KED) | -0.014 ppb            | 20,869 cps        | 1.2 %         |
| 205Tl (KED) | 0.004 ppb             | 747 cps           | 8.7 %         |
| 208Pb (KED) | 0.243 ppb             | 39,571 cps        | 1.5 %         |
| 209Bi (KED) | 171.544 %             | 3,828,250 cps     | 0.8 %         |
| 232Th (KED) | 0.036 ppb             | 10,065 cps        | 4.1 %         |
| 238U (KED)  | 0.008 ppb             | 2,531 cps         | 3.3 %         |

## Sample Summary

Instrument ID: iCAP Q

Analysis index: 12

Analysis name: 088jian

Analysis started at: 10/14/2021 11:54:52 AM

User name: WINDOWS-UPCI4ER\Administrator

| Category    | Concentration average | Concentration RSD |
|-------------|-----------------------|-------------------|
| 6Li (KED)   | 190.536 %             | 3.1 %             |
| 9Be (KED)   | 0.024 ppb             | 36.9 %            |
| 11B (KED)   | 0.109 ppb             | 745.4 %           |
| 24Mg (KED)  | 132.618 ppb           | 3.7 %             |
| 27Al (KED)  | 70.459 ppb            | 2.2 %             |
| 45Sc (KED)  | 186.708 %             | 1.0 %             |
| 51V (KED)   | 0.149 ppb             | 3.3 %             |
| 52Cr (KED)  | 0.486 ppb             | 0.9 %             |
| 55Mn (KED)  | 2.903 ppb             | 1.1 %             |
| 56Fe (KED)  | 95.279 ppb            | 0.5 %             |
| 58Ni (KED)  | 0.548 ppb             | 2.4 %             |
| 59Co (KED)  | 0.037 ppb             | 4.5 %             |
| 63Cu (KED)  | 2.463 ppb             | 1.4 %             |
| 64Zn (KED)  | 51.026 ppb            | 1.1 %             |
| 69Ga (KED)  | 0.418 ppb             | 1.9 %             |
| 75As (KED)  | 0.068 ppb             | 25.0 %            |
| 80Se (KED)  | -3.236 ppb            | 6.2 %             |
| 85Rb (KED)  | 0.923 ppb             | 3.3 %             |
| 88Sr (KED)  | 2.272 ppb             | 1.2 %             |
| 89Y (KED)   | 177.145 %             | 2.2 %             |
| 107Ag (KED) | 0.016 ppb             | 0.5 %             |
| 114Cd (KED) | 0.008 ppb             | 9.9 %             |
| 115In (KED) | 174.746 %             | 2.3 %             |
| 133Cs (KED) | 0.016 ppb             | 10.8 %            |
| 138Ba (KED) | 1.444 ppb             | 0.8 %             |
| 139La (KED) | 0.067 ppb             | 1.6 %             |
| 140Ce (KED) | 0.171 ppb             | 1.6 %             |
| 141Pr (KED) | 0.016 ppb             | 6.0 %             |
| 142Nd (KED) | 0.097 ppb             | 1.7 %             |
| 152Sm (KED) | 0.012 ppb             | 5.9 %             |
| 153Eu (KED) | 0.002 ppb             | 18.2 %            |
| 158Gd (KED) | 0.010 ppb             | 8.0 %             |
| 159Tb (KED) | 184.797 %             | 0.4 %             |
| 164Dy (KED) | 0.007 ppb             | 1.7 %             |
| 166Er (KED) | 0.003 ppb             | 18.2 %            |
| 169Tm (KED) | 0.001 ppb             | 7.7 %             |
| 174Yb (KED) | 0.003 ppb             | 4.9 %             |
| 175Lu (KED) | -0.012 ppb            | 13.3 %            |
| 205Tl (KED) | 0.003 ppb             | 9.9 %             |
| 208Pb (KED) | 0.145 ppb             | 4.0 %             |
| 209Bi (KED) | 168.629 %             | 2.0 %             |
| 232Th (KED) | 0.021 ppb             | 8.0 %             |
| 238U (KED)  | 0.006 ppb             | 3.8 %             |

| Category   | Concentration average | Intensity average | Intensity RSD |
|------------|-----------------------|-------------------|---------------|
| 6Li (KED)  | 190.536 %             | 3,976 cps         | 3.1 %         |
| 9Be (KED)  | 0.024 ppb             | 6 cps             | 34.6 %        |
| 11B (KED)  | 0.109 ppb             | 1,528 cps         | 4.8 %         |
| 24Mg (KED) | 132.618 ppb           | 122,365 cps       | 1.9 %         |
| 27Al (KED) | 70.459 ppb            | 18,426 cps        | 2.7 %         |

| Category    | Concentration average | Intensity average | Intensity RSD |
|-------------|-----------------------|-------------------|---------------|
| 45Sc (KED)  | 186.708 %             | 79,956 cps        | 1.0 %         |
| 51V (KED)   | 0.149 ppb             | 1,881 cps         | 2.9 %         |
| 52Cr (KED)  | 0.486 ppb             | 9,608 cps         | 1.7 %         |
| 55Mn (KED)  | 2.903 ppb             | 31,855 cps        | 0.4 %         |
| 56Fe (KED)  | 95.279 ppb            | 1,717,428 cps     | 0.7 %         |
| 58Ni (KED)  | 0.548 ppb             | 12,163 cps        | 1.7 %         |
| 59Co (KED)  | 0.037 ppb             | 1,378 cps         | 5.0 %         |
| 63Cu (KED)  | 2.463 ppb             | 60,300 cps        | 1.6 %         |
| 64Zn (KED)  | 51.026 ppb            | 401,942 cps       | 1.3 %         |
| 69Ga (KED)  | 0.418 ppb             | 4,162 cps         | 3.5 %         |
| 75As (KED)  | 0.068 ppb             | 171 cps           | 22.8 %        |
| 80Se (KED)  | -3.236 ppb            | 3,150 cps         | 2.8 %         |
| 85Rb (KED)  | 0.923 ppb             | 8,481 cps         | 1.5 %         |
| 88Sr (KED)  | 2.272 ppb             | 30,572 cps        | 1.7 %         |
| 89Y (KED)   | 177.145 %             | 629,513 cps       | 2.2 %         |
| 107Ag (KED) | 0.016 ppb             | 1,040 cps         | 2.0 %         |
| 114Cd (KED) | 0.008 ppb             | 277 cps           | 9.1 %         |
| 115In (KED) | 174.746 %             | 1,108,741 cps     | 2.3 %         |
| 133Cs (KED) | 0.016 ppb             | 709 cps           | 12.6 %        |
| 138Ba (KED) | 1.444 ppb             | 82,784 cps        | 0.7 %         |
| 139La (KED) | 0.067 ppb             | 7,629 cps         | 1.9 %         |
| 140Ce (KED) | 0.171 ppb             | 24,909 cps        | 1.4 %         |
| 141Pr (KED) | 0.016 ppb             | 2,512 cps         | 6.0 %         |
| 142Nd (KED) | 0.097 ppb             | 6,025 cps         | 1.5 %         |
| 152Sm (KED) | 0.012 ppb             | 629 cps           | 5.8 %         |
| 153Eu (KED) | 0.002 ppb             | 250 cps           | 17.5 %        |
| 158Gd (KED) | 0.010 ppb             | 660 cps           | 7.8 %         |
| 159Tb (KED) | 184.797 %             | 4,869,526 cps     | 0.4 %         |
| 164Dy (KED) | 0.007 ppb             | 580 cps           | 1.7 %         |
| 166Er (KED) | 0.003 ppb             | 711 cps           | 7.1 %         |
| 169Tm (KED) | 0.001 ppb             | 180 cps           | 6.4 %         |
| 174Yb (KED) | 0.003 ppb             | 334 cps           | 4.9 %         |
| 175Lu (KED) | -0.012 ppb            | 20,859 cps        | 1.4 %         |
| 205Tl (KED) | 0.003 ppb             | 611 cps           | 11.6 %        |
| 208Pb (KED) | 0.145 ppb             | 25,789 cps        | 1.3 %         |
| 209Bi (KED) | 168.629 %             | 3,763,190 cps     | 2.0 %         |
| 232Th (KED) | 0.021 ppb             | 5,712 cps         | 6.1 %         |
| 238U (KED)  | 0.006 ppb             | 1,920 cps         | 1.7 %         |

## Sample Summary

Instrument ID: iCAP Q

Analysis index: 13

Analysis name: 0902jian

Analysis started at: 10/14/2021 11:58:57 AM

User name: WINDOWS-UPCI4ER\Administrator

| Category    | Concentration average | Concentration RSD |
|-------------|-----------------------|-------------------|
| 6Li (KED)   | 186.968 %             | 6.3 %             |
| 9Be (KED)   | 0.005 ppb             | 173.2 %           |
| 11B (KED)   | 33.931 ppb            | 10.7 %            |
| 24Mg (KED)  | 167.176 ppb           | 4.4 %             |
| 27Al (KED)  | 131.333 ppb           | 1.2 %             |
| 45Sc (KED)  | 186.099 %             | 1.2 %             |
| 51V (KED)   | 0.264 ppb             | 3.8 %             |
| 52Cr (KED)  | 0.960 ppb             | 1.3 %             |
| 55Mn (KED)  | 5.083 ppb             | 0.2 %             |
| 56Fe (KED)  | 147.707 ppb           | 1.3 %             |
| 58Ni (KED)  | 0.799 ppb             | 1.8 %             |
| 59Co (KED)  | 0.062 ppb             | 2.7 %             |
| 63Cu (KED)  | 2.303 ppb             | 0.6 %             |
| 64Zn (KED)  | 52.305 ppb            | 2.2 %             |
| 69Ga (KED)  | 0.611 ppb             | 1.2 %             |
| 75As (KED)  | 0.094 ppb             | 13.5 %            |
| 80Se (KED)  | -3.300 ppb            | 6.4 %             |
| 85Rb (KED)  | 1.297 ppb             | 2.0 %             |
| 88Sr (KED)  | 2.639 ppb             | 0.6 %             |
| 89Y (KED)   | 179.748 %             | 1.2 %             |
| 107Ag (KED) | 0.022 ppb             | 4.0 %             |
| 114Cd (KED) | 0.014 ppb             | 5.7 %             |
| 115In (KED) | 172.398 %             | 0.4 %             |
| 133Cs (KED) | 0.028 ppb             | 4.5 %             |
| 138Ba (KED) | 2.173 ppb             | 1.5 %             |
| 139La (KED) | 0.140 ppb             | 2.6 %             |
| 140Ce (KED) | 0.375 ppb             | 1.3 %             |
| 141Pr (KED) | 0.035 ppb             | 1.7 %             |
| 142Nd (KED) | 0.209 ppb             | 1.9 %             |
| 152Sm (KED) | 0.024 ppb             | 4.1 %             |
| 153Eu (KED) | 0.005 ppb             | 4.7 %             |
| 158Gd (KED) | 0.019 ppb             | 4.9 %             |
| 159Tb (KED) | 185.823 %             | 0.9 %             |
| 164Dy (KED) | 0.015 ppb             | 2.7 %             |
| 166Er (KED) | 0.010 ppb             | 7.1 %             |
| 169Tm (KED) | 0.001 ppb             | 7.3 %             |
| 174Yb (KED) | 0.005 ppb             | 1.9 %             |
| 175Lu (KED) | -0.016 ppb            | 29.9 %            |
| 205Tl (KED) | 0.004 ppb             | 3.0 %             |
| 208Pb (KED) | 0.232 ppb             | 4.9 %             |
| 209Bi (KED) | 167.585 %             | 1.3 %             |
| 232Th (KED) | 0.040 ppb             | 0.1 %             |
| 238U (KED)  | 0.010 ppb             | 3.6 %             |

| Category   | Concentration average | Intensity average | Intensity RSD |
|------------|-----------------------|-------------------|---------------|
| 6Li (KED)  | 186.968 %             | 3,902 cps         | 6.3 %         |
| 9Be (KED)  | 0.005 ppb             | 1 cps             | 173.2 %       |
| 11B (KED)  | 33.931 ppb            | 5,304 cps         | 1.7 %         |
| 24Mg (KED) | 167.176 ppb           | 151,139 cps       | 1.8 %         |
| 27Al (KED) | 131.333 ppb           | 34,106 cps        | 2.2 %         |

| Category    | Concentration average | Intensity average | Intensity RSD |
|-------------|-----------------------|-------------------|---------------|
| 45Sc (KED)  | 186.099 %             | 79,696 cps        | 1.2 %         |
| 51V (KED)   | 0.264 ppb             | 3,324 cps         | 2.7 %         |
| 52Cr (KED)  | 0.960 ppb             | 18,674 cps        | 1.3 %         |
| 55Mn (KED)  | 5.083 ppb             | 55,413 cps        | 1.2 %         |
| 56Fe (KED)  | 147.707 ppb           | 2,651,151 cps     | 0.4 %         |
| 58Ni (KED)  | 0.799 ppb             | 17,468 cps        | 0.5 %         |
| 59Co (KED)  | 0.062 ppb             | 2,231 cps         | 1.9 %         |
| 63Cu (KED)  | 2.303 ppb             | 57,265 cps        | 1.1 %         |
| 64Zn (KED)  | 52.305 ppb            | 418,032 cps       | 1.1 %         |
| 69Ga (KED)  | 0.611 ppb             | 6,132 cps         | 1.3 %         |
| 75As (KED)  | 0.094 ppb             | 232 cps           | 11.6 %        |
| 80Se (KED)  | -3.300 ppb            | 3,152 cps         | 5.2 %         |
| 85Rb (KED)  | 1.297 ppb             | 12,079 cps        | 1.2 %         |
| 88Sr (KED)  | 2.639 ppb             | 36,015 cps        | 1.1 %         |
| 89Y (KED)   | 179.748 %             | 638,765 cps       | 1.2 %         |
| 107Ag (KED) | 0.022 ppb             | 1,345 cps         | 3.6 %         |
| 114Cd (KED) | 0.014 ppb             | 441 cps           | 4.9 %         |
| 115In (KED) | 172.398 %             | 1,093,844 cps     | 0.4 %         |
| 133Cs (KED) | 0.028 ppb             | 1,237 cps         | 4.7 %         |
| 138Ba (KED) | 2.173 ppb             | 124,627 cps       | 2.5 %         |
| 139La (KED) | 0.140 ppb             | 16,053 cps        | 1.9 %         |
| 140Ce (KED) | 0.375 ppb             | 54,728 cps        | 1.3 %         |
| 141Pr (KED) | 0.035 ppb             | 5,490 cps         | 0.9 %         |
| 142Nd (KED) | 0.209 ppb             | 12,990 cps        | 1.1 %         |
| 152Sm (KED) | 0.024 ppb             | 1,328 cps         | 3.3 %         |
| 153Eu (KED) | 0.005 ppb             | 517 cps           | 5.3 %         |
| 158Gd (KED) | 0.019 ppb             | 1,297 cps         | 4.2 %         |
| 159Tb (KED) | 185.823 %             | 4,896,562 cps     | 0.9 %         |
| 164Dy (KED) | 0.015 ppb             | 1,153 cps         | 1.8 %         |
| 166Er (KED) | 0.010 ppb             | 1,310 cps         | 5.4 %         |
| 169Tm (KED) | 0.001 ppb             | 283 cps           | 6.6 %         |
| 174Yb (KED) | 0.005 ppb             | 578 cps           | 1.8 %         |
| 175Lu (KED) | -0.016 ppb            | 20,200 cps        | 4.1 %         |
| 205Tl (KED) | 0.004 ppb             | 688 cps           | 2.8 %         |
| 208Pb (KED) | 0.232 ppb             | 37,138 cps        | 2.9 %         |
| 209Bi (KED) | 167.585 %             | 3,739,888 cps     | 1.3 %         |
| 232Th (KED) | 0.040 ppb             | 11,059 cps        | 1.4 %         |
| 238U (KED)  | 0.010 ppb             | 3,177 cps         | 4.5 %         |

## Sample Summary

Instrument ID: iCAP Q

Analysis index: 14

Analysis name: 001jian

Analysis started at: 10/14/2021 12:03:20 PM

User name: WINDOWS-UPCI4ER\Administrator

| Category    | Concentration average | Concentration RSD |
|-------------|-----------------------|-------------------|
| 6Li (KED)   | 194.638 %             | 3.1 %             |
| 9Be (KED)   | 0.000 ppb             |                   |
| 11B (KED)   | 7.294 ppb             | 6.8 %             |
| 24Mg (KED)  | 115.098 ppb           | 3.9 %             |
| 27Al (KED)  | 65.548 ppb            | 3.4 %             |
| 45Sc (KED)  | 182.562 %             | 1.5 %             |
| 51V (KED)   | 0.131 ppb             | 3.1 %             |
| 52Cr (KED)  | 0.691 ppb             | 2.4 %             |
| 55Mn (KED)  | 3.463 ppb             | 2.3 %             |
| 56Fe (KED)  | 89.365 ppb            | 1.0 %             |
| 58Ni (KED)  | 0.545 ppb             | 1.3 %             |
| 59Co (KED)  | 0.040 ppb             | 2.9 %             |
| 63Cu (KED)  | 2.830 ppb             | 1.6 %             |
| 64Zn (KED)  | 59.070 ppb            | 1.8 %             |
| 69Ga (KED)  | 0.463 ppb             | 6.9 %             |
| 75As (KED)  | 0.066 ppb             | 15.0 %            |
| 80Se (KED)  | -3.273 ppb            | 2.3 %             |
| 85Rb (KED)  | 2.713 ppb             | 2.4 %             |
| 88Sr (KED)  | 1.492 ppb             | 0.7 %             |
| 89Y (KED)   | 178.930 %             | 0.8 %             |
| 107Ag (KED) | 0.013 ppb             | 6.3 %             |
| 114Cd (KED) | 0.016 ppb             | 2.9 %             |
| 115In (KED) | 173.031 %             | 0.8 %             |
| 133Cs (KED) | 0.014 ppb             | 3.6 %             |
| 138Ba (KED) | 1.609 ppb             | 5.6 %             |
| 139La (KED) | 0.091 ppb             | 3.6 %             |
| 140Ce (KED) | 0.283 ppb             | 1.0 %             |
| 141Pr (KED) | 0.022 ppb             | 7.2 %             |
| 142Nd (KED) | 0.143 ppb             | 3.5 %             |
| 152Sm (KED) | 0.014 ppb             | 8.8 %             |
| 153Eu (KED) | 0.003 ppb             | 5.0 %             |
| 158Gd (KED) | 0.011 ppb             | 5.1 %             |
| 159Tb (KED) | 185.170 %             | 1.7 %             |
| 164Dy (KED) | 0.008 ppb             | 15.7 %            |
| 166Er (KED) | 0.006 ppb             | 7.9 %             |
| 169Tm (KED) | 0.000 ppb             | 4.8 %             |
| 174Yb (KED) | 0.003 ppb             | 8.4 %             |
| 175Lu (KED) | -0.013 ppb            | 10.4 %            |
| 205Tl (KED) | 0.003 ppb             | 5.4 %             |
| 208Pb (KED) | 0.239 ppb             | 3.5 %             |
| 209Bi (KED) | 167.173 %             | 0.5 %             |
| 232Th (KED) | 0.024 ppb             | 2.9 %             |
| 238U (KED)  | 0.006 ppb             | 4.1 %             |

| Category   | Concentration average | Intensity average | Intensity RSD |
|------------|-----------------------|-------------------|---------------|
| 6Li (KED)  | 194.638 %             | 4,062 cps         | 3.1 %         |
| 9Be (KED)  | 0.000 ppb             | 0 cps             |               |
| 11B (KED)  | 7.294 ppb             | 2,406 cps         | 0.9 %         |
| 24Mg (KED) | 115.098 ppb           | 108,500 cps       | 1.4 %         |
| 27Al (KED) | 65.548 ppb            | 16,765 cps        | 2.0 %         |

| Category    | Concentration average | Intensity average | Intensity RSD |
|-------------|-----------------------|-------------------|---------------|
| 45Sc (KED)  | 182.562 %             | 78,181 cps        | 1.5 %         |
| 51V (KED)   | 0.131 ppb             | 1,616 cps         | 2.2 %         |
| 52Cr (KED)  | 0.691 ppb             | 13,246 cps        | 0.9 %         |
| 55Mn (KED)  | 3.463 ppb             | 37,107 cps        | 0.9 %         |
| 56Fe (KED)  | 89.365 ppb            | 1,575,494 cps     | 2.5 %         |
| 58Ni (KED)  | 0.545 ppb             | 11,821 cps        | 1.0 %         |
| 59Co (KED)  | 0.040 ppb             | 1,438 cps         | 3.3 %         |
| 63Cu (KED)  | 2.830 ppb             | 69,911 cps        | 2.2 %         |
| 64Zn (KED)  | 59.070 ppb            | 469,796 cps       | 1.0 %         |
| 69Ga (KED)  | 0.463 ppb             | 4,639 cps         | 6.6 %         |
| 75As (KED)  | 0.066 ppb             | 168 cps           | 13.5 %        |
| 80Se (KED)  | -3.273 ppb            | 3,157 cps         | 2.4 %         |
| 85Rb (KED)  | 2.713 ppb             | 25,109 cps        | 2.2 %         |
| 88Sr (KED)  | 1.492 ppb             | 20,327 cps        | 1.2 %         |
| 89Y (KED)   | 178.930 %             | 635,856 cps       | 0.8 %         |
| 107Ag (KED) | 0.013 ppb             | 821 cps           | 5.5 %         |
| 114Cd (KED) | 0.016 ppb             | 489 cps           | 3.2 %         |
| 115In (KED) | 173.031 %             | 1,097,857 cps     | 0.8 %         |
| 133Cs (KED) | 0.014 ppb             | 636 cps           | 3.5 %         |
| 138Ba (KED) | 1.609 ppb             | 92,316 cps        | 6.3 %         |
| 139La (KED) | 0.091 ppb             | 10,447 cps        | 3.2 %         |
| 140Ce (KED) | 0.283 ppb             | 41,189 cps        | 1.8 %         |
| 141Pr (KED) | 0.022 ppb             | 3,384 cps         | 5.8 %         |
| 142Nd (KED) | 0.143 ppb             | 8,864 cps         | 4.9 %         |
| 152Sm (KED) | 0.014 ppb             | 761 cps           | 9.3 %         |
| 153Eu (KED) | 0.003 ppb             | 297 cps           | 3.9 %         |
| 158Gd (KED) | 0.011 ppb             | 768 cps           | 5.9 %         |
| 159Tb (KED) | 185.170 %             | 4,879,347 cps     | 1.7 %         |
| 164Dy (KED) | 0.008 ppb             | 622 cps           | 15.0 %        |
| 166Er (KED) | 0.006 ppb             | 989 cps           | 2.9 %         |
| 169Tm (KED) | 0.000 ppb             | 156 cps           | 5.4 %         |
| 174Yb (KED) | 0.003 ppb             | 293 cps           | 6.9 %         |
| 175Lu (KED) | -0.013 ppb            | 20,555 cps        | 0.8 %         |
| 205Tl (KED) | 0.003 ppb             | 610 cps           | 4.7 %         |
| 208Pb (KED) | 0.239 ppb             | 38,096 cps        | 3.1 %         |
| 209Bi (KED) | 167.173 %             | 3,730,702 cps     | 0.5 %         |
| 232Th (KED) | 0.024 ppb             | 6,495 cps         | 3.0 %         |
| 238U (KED)  | 0.006 ppb             | 1,935 cps         | 3.7 %         |

## Sample Summary

Instrument ID: iCAP Q

Analysis index: 15

Analysis name: 3456jian

Analysis started at: 10/14/2021 12:07:15 PM

User name: WINDOWS-UPCI4ER\Administrator

| Category    | Concentration average | Concentration RSD |
|-------------|-----------------------|-------------------|
| 6Li (KED)   | 189.578 %             | 4.0 %             |
| 9Be (KED)   | 0.000 ppb             |                   |
| 11B (KED)   | 9.868 ppb             | 7.8 %             |
| 24Mg (KED)  | 224.858 ppb           | 6.1 %             |
| 27Al (KED)  | 153.227 ppb           | 1.4 %             |
| 45Sc (KED)  | 188.979 %             | 1.1 %             |
| 51V (KED)   | 0.308 ppb             | 4.0 %             |
| 52Cr (KED)  | 1.111 ppb             | 2.9 %             |
| 55Mn (KED)  | 6.970 ppb             | 2.7 %             |
| 56Fe (KED)  | 174.851 ppb           | 2.0 %             |
| 58Ni (KED)  | 1.077 ppb             | 2.5 %             |
| 59Co (KED)  | 0.075 ppb             | 4.2 %             |
| 63Cu (KED)  | 2.567 ppb             | 1.8 %             |
| 64Zn (KED)  | 56.396 ppb            | 1.2 %             |
| 69Ga (KED)  | 0.794 ppb             | 2.8 %             |
| 75As (KED)  | 0.126 ppb             | 16.4 %            |
| 80Se (KED)  | -3.259 ppb            | 1.7 %             |
| 85Rb (KED)  | 1.651 ppb             | 1.3 %             |
| 88Sr (KED)  | 3.663 ppb             | 2.8 %             |
| 89Y (KED)   | 181.075 %             | 0.5 %             |
| 107Ag (KED) | 0.011 ppb             | 1.2 %             |
| 114Cd (KED) | 0.014 ppb             | 8.0 %             |
| 115In (KED) | 173.004 %             | 0.4 %             |
| 133Cs (KED) | 0.031 ppb             | 1.2 %             |
| 138Ba (KED) | 2.660 ppb             | 2.2 %             |
| 139La (KED) | 0.175 ppb             | 2.1 %             |
| 140Ce (KED) | 0.455 ppb             | 1.4 %             |
| 141Pr (KED) | 0.041 ppb             | 2.8 %             |
| 142Nd (KED) | 0.249 ppb             | 4.6 %             |
| 152Sm (KED) | 0.030 ppb             | 5.3 %             |
| 153Eu (KED) | 0.006 ppb             | 4.5 %             |
| 158Gd (KED) | 0.024 ppb             | 7.0 %             |
| 159Tb (KED) | 186.212 %             | 0.5 %             |
| 164Dy (KED) | 0.017 ppb             | 5.9 %             |
| 166Er (KED) | 0.009 ppb             | 1.6 %             |
| 169Tm (KED) | 0.001 ppb             | 8.6 %             |
| 174Yb (KED) | 0.007 ppb             | 2.5 %             |
| 175Lu (KED) | -0.012 ppb            | 26.8 %            |
| 205Tl (KED) | 0.005 ppb             | 4.5 %             |
| 208Pb (KED) | 0.297 ppb             | 2.6 %             |
| 209Bi (KED) | 166.746 %             | 1.3 %             |
| 232Th (KED) | 0.046 ppb             | 1.9 %             |
| 238U (KED)  | 0.011 ppb             | 4.3 %             |

| Category   | Concentration average | Intensity average | Intensity RSD |
|------------|-----------------------|-------------------|---------------|
| 6Li (KED)  | 189.578 %             | 3,956 cps         | 4.0 %         |
| 9Be (KED)  | 0.000 ppb             | 0 cps             |               |
| 11B (KED)  | 9.868 ppb             | 2,637 cps         | 0.7 %         |
| 24Mg (KED) | 224.858 ppb           | 206,097 cps       | 2.3 %         |
| 27Al (KED) | 153.227 ppb           | 40,376 cps        | 1.0 %         |

| Category    | Concentration average | Intensity average | Intensity RSD |
|-------------|-----------------------|-------------------|---------------|
| 45Sc (KED)  | 188.979 %             | 80,929 cps        | 1.1 %         |
| 51V (KED)   | 0.308 ppb             | 3,931 cps         | 3.9 %         |
| 52Cr (KED)  | 1.111 ppb             | 21,911 cps        | 1.9 %         |
| 55Mn (KED)  | 6.970 ppb             | 77,056 cps        | 1.8 %         |
| 56Fe (KED)  | 174.851 ppb           | 3,186,160 cps     | 1.7 %         |
| 58Ni (KED)  | 1.077 ppb             | 23,726 cps        | 1.4 %         |
| 59Co (KED)  | 0.075 ppb             | 2,741 cps         | 3.3 %         |
| 63Cu (KED)  | 2.567 ppb             | 64,232 cps        | 1.3 %         |
| 64Zn (KED)  | 56.396 ppb            | 453,999 cps       | 0.7 %         |
| 69Ga (KED)  | 0.794 ppb             | 8,014 cps         | 2.2 %         |
| 75As (KED)  | 0.126 ppb             | 307 cps           | 15.4 %        |
| 80Se (KED)  | -3.259 ppb            | 3,205 cps         | 1.2 %         |
| 85Rb (KED)  | 1.651 ppb             | 15,482 cps        | 1.5 %         |
| 88Sr (KED)  | 3.663 ppb             | 50,295 cps        | 2.3 %         |
| 89Y (KED)   | 181.075 %             | 643,481 cps       | 0.5 %         |
| 107Ag (KED) | 0.011 ppb             | 703 cps           | 1.4 %         |
| 114Cd (KED) | 0.014 ppb             | 444 cps           | 7.0 %         |
| 115In (KED) | 173.004 %             | 1,097,685 cps     | 0.4 %         |
| 133Cs (KED) | 0.031 ppb             | 1,339 cps         | 1.1 %         |
| 138Ba (KED) | 2.660 ppb             | 152,613 cps       | 2.7 %         |
| 139La (KED) | 0.175 ppb             | 20,098 cps        | 1.7 %         |
| 140Ce (KED) | 0.455 ppb             | 66,515 cps        | 1.9 %         |
| 141Pr (KED) | 0.041 ppb             | 6,505 cps         | 2.6 %         |
| 142Nd (KED) | 0.249 ppb             | 15,509 cps        | 5.1 %         |
| 152Sm (KED) | 0.030 ppb             | 1,616 cps         | 4.8 %         |
| 153Eu (KED) | 0.006 ppb             | 653 cps           | 4.9 %         |
| 158Gd (KED) | 0.024 ppb             | 1,589 cps         | 7.2 %         |
| 159Tb (KED) | 186.212 %             | 4,906,812 cps     | 0.5 %         |
| 164Dy (KED) | 0.017 ppb             | 1,302 cps         | 6.0 %         |
| 166Er (KED) | 0.009 ppb             | 1,278 cps         | 0.8 %         |
| 169Tm (KED) | 0.001 ppb             | 338 cps           | 8.0 %         |
| 174Yb (KED) | 0.007 ppb             | 728 cps           | 2.9 %         |
| 175Lu (KED) | -0.012 ppb            | 20,850 cps        | 3.0 %         |
| 205Tl (KED) | 0.005 ppb             | 886 cps           | 5.3 %         |
| 208Pb (KED) | 0.297 ppb             | 45,689 cps        | 1.6 %         |
| 209Bi (KED) | 166.746 %             | 3,721,165 cps     | 1.3 %         |
| 232Th (KED) | 0.046 ppb             | 12,629 cps        | 0.6 %         |
| 238U (KED)  | 0.011 ppb             | 3,428 cps         | 2.9 %         |

## Sample Summary

Instrument ID: iCAP Q

Analysis index: 16

Analysis name: 051jian

Analysis started at: 10/14/2021 12:11:19 PM

User name: WINDOWS-UPCI4ER\Administrator

| Category    | Concentration average | Concentration RSD |
|-------------|-----------------------|-------------------|
| 6Li (KED)   | 190.803 %             | 3.9 %             |
| 9Be (KED)   | 0.014 ppb             | 98.0 %            |
| 11B (KED)   | 1.559 ppb             | 67.8 %            |
| 24Mg (KED)  | 244.594 ppb           | 3.2 %             |
| 27Al (KED)  | 142.598 ppb           | 0.3 %             |
| 45Sc (KED)  | 186.577 %             | 0.9 %             |
| 51V (KED)   | 0.293 ppb             | 2.7 %             |
| 52Cr (KED)  | 1.648 ppb             | 1.0 %             |
| 55Mn (KED)  | 7.971 ppb             | 1.7 %             |
| 56Fe (KED)  | 169.817 ppb           | 0.7 %             |
| 58Ni (KED)  | 1.068 ppb             | 1.4 %             |
| 59Co (KED)  | 0.091 ppb             | 3.9 %             |
| 63Cu (KED)  | 3.136 ppb             | 1.4 %             |
| 64Zn (KED)  | 53.609 ppb            | 1.9 %             |
| 69Ga (KED)  | 0.698 ppb             | 4.0 %             |
| 75As (KED)  | 0.098 ppb             | 17.2 %            |
| 80Se (KED)  | -2.981 ppb            | 6.9 %             |
| 85Rb (KED)  | 2.799 ppb             | 2.8 %             |
| 88Sr (KED)  | 2.955 ppb             | 3.8 %             |
| 89Y (KED)   | 177.471 %             | 1.3 %             |
| 107Ag (KED) | 0.019 ppb             | 6.3 %             |
| 114Cd (KED) | 0.028 ppb             | 5.0 %             |
| 115In (KED) | 173.910 %             | 1.8 %             |
| 133Cs (KED) | 0.028 ppb             | 3.5 %             |
| 138Ba (KED) | 2.392 ppb             | 1.2 %             |
| 139La (KED) | 0.168 ppb             | 0.4 %             |
| 140Ce (KED) | 0.385 ppb             | 2.2 %             |
| 141Pr (KED) | 0.039 ppb             | 0.7 %             |
| 142Nd (KED) | 0.228 ppb             | 0.8 %             |
| 152Sm (KED) | 0.026 ppb             | 7.4 %             |
| 153Eu (KED) | 0.005 ppb             | 8.0 %             |
| 158Gd (KED) | 0.022 ppb             | 4.6 %             |
| 159Tb (KED) | 185.608 %             | 0.2 %             |
| 164Dy (KED) | 0.016 ppb             | 9.0 %             |
| 166Er (KED) | 0.008 ppb             | 3.6 %             |
| 169Tm (KED) | 0.001 ppb             | 23.7 %            |
| 174Yb (KED) | 0.006 ppb             | 5.5 %             |
| 175Lu (KED) | -0.012 ppb            | 43.9 %            |
| 205Tl (KED) | 0.004 ppb             | 5.7 %             |
| 208Pb (KED) | 0.258 ppb             | 1.3 %             |
| 209Bi (KED) | 168.079 %             | 2.1 %             |
| 232Th (KED) | 0.054 ppb             | 2.7 %             |
| 238U (KED)  | 0.010 ppb             | 4.2 %             |

| Category   | Concentration average | Intensity average | Intensity RSD |
|------------|-----------------------|-------------------|---------------|
| 6Li (KED)  | 190.803 %             | 3,982 cps         | 3.9 %         |
| 9Be (KED)  | 0.014 ppb             | 3 cps             | 100.0 %       |
| 11B (KED)  | 1.559 ppb             | 1,700 cps         | 9.9 %         |
| 24Mg (KED) | 244.594 ppb           | 225,803 cps       | 1.2 %         |
| 27Al (KED) | 142.598 ppb           | 37,111 cps        | 0.9 %         |

| Category    | Concentration average | Intensity average | Intensity RSD |
|-------------|-----------------------|-------------------|---------------|
| 45Sc (KED)  | 186.577 %             | 79,901 cps        | 0.9 %         |
| 51V (KED)   | 0.293 ppb             | 3,694 cps         | 2.8 %         |
| 52Cr (KED)  | 1.648 ppb             | 31,963 cps        | 1.0 %         |
| 55Mn (KED)  | 7.971 ppb             | 86,974 cps        | 0.7 %         |
| 56Fe (KED)  | 169.817 ppb           | 3,055,425 cps     | 1.1 %         |
| 58Ni (KED)  | 1.068 ppb             | 23,246 cps        | 2.0 %         |
| 59Co (KED)  | 0.091 ppb             | 3,245 cps         | 3.4 %         |
| 63Cu (KED)  | 3.136 ppb             | 76,753 cps        | 0.5 %         |
| 64Zn (KED)  | 53.609 ppb            | 422,989 cps       | 0.7 %         |
| 69Ga (KED)  | 0.698 ppb             | 6,913 cps         | 3.4 %         |
| 75As (KED)  | 0.098 ppb             | 237 cps           | 14.7 %        |
| 80Se (KED)  | -2.981 ppb            | 3,344 cps         | 3.4 %         |
| 85Rb (KED)  | 2.799 ppb             | 25,687 cps        | 1.6 %         |
| 88Sr (KED)  | 2.955 ppb             | 39,780 cps        | 2.5 %         |
| 89Y (KED)   | 177.471 %             | 630,672 cps       | 1.3 %         |
| 107Ag (KED) | 0.019 ppb             | 1,175 cps         | 5.2 %         |
| 114Cd (KED) | 0.028 ppb             | 794 cps           | 3.6 %         |
| 115In (KED) | 173.910 %             | 1,103,435 cps     | 1.8 %         |
| 133Cs (KED) | 0.028 ppb             | 1,217 cps         | 2.1 %         |
| 138Ba (KED) | 2.392 ppb             | 136,915 cps       | 1.3 %         |
| 139La (KED) | 0.168 ppb             | 19,328 cps        | 0.6 %         |
| 140Ce (KED) | 0.385 ppb             | 56,111 cps        | 2.4 %         |
| 141Pr (KED) | 0.039 ppb             | 6,170 cps         | 0.6 %         |
| 142Nd (KED) | 0.228 ppb             | 14,155 cps        | 0.6 %         |
| 152Sm (KED) | 0.026 ppb             | 1,406 cps         | 7.6 %         |
| 153Eu (KED) | 0.005 ppb             | 561 cps           | 7.7 %         |
| 158Gd (KED) | 0.022 ppb             | 1,445 cps         | 4.4 %         |
| 159Tb (KED) | 185.608 %             | 4,890,904 cps     | 0.2 %         |
| 164Dy (KED) | 0.016 ppb             | 1,221 cps         | 8.7 %         |
| 166Er (KED) | 0.008 ppb             | 1,133 cps         | 2.3 %         |
| 169Tm (KED) | 0.001 ppb             | 318 cps           | 22.2 %        |
| 174Yb (KED) | 0.006 ppb             | 627 cps           | 5.6 %         |
| 175Lu (KED) | -0.012 ppb            | 20,964 cps        | 4.8 %         |
| 205Tl (KED) | 0.004 ppb             | 837 cps           | 7.6 %         |
| 208Pb (KED) | 0.258 ppb             | 40,835 cps        | 1.0 %         |
| 209Bi (KED) | 168.079 %             | 3,750,920 cps     | 2.1 %         |
| 232Th (KED) | 0.054 ppb             | 14,817 cps        | 2.7 %         |
| 238U (KED)  | 0.010 ppb             | 2,951 cps         | 3.5 %         |

## Sample Summary

Instrument ID: iCAP Q

Analysis index: 17

Analysis name: 024jian

Analysis started at: 10/14/2021 12:15:25 PM

User name: WINDOWS-UPCI4ER\Administrator

| Category    | Concentration average | Concentration RSD |
|-------------|-----------------------|-------------------|
| 6Li (KED)   | 183.399 %             | 4.8 %             |
| 9Be (KED)   | 0.000 ppb             |                   |
| 11B (KED)   | -1.636 ppb            | 41.4 %            |
| 24Mg (KED)  | 204.294 ppb           | 5.6 %             |
| 27Al (KED)  | 110.230 ppb           | 2.0 %             |
| 45Sc (KED)  | 188.426 %             | 1.1 %             |
| 51V (KED)   | 0.226 ppb             | 4.6 %             |
| 52Cr (KED)  | 1.479 ppb             | 0.8 %             |
| 55Mn (KED)  | 6.115 ppb             | 3.1 %             |
| 56Fe (KED)  | 138.386 ppb           | 1.8 %             |
| 58Ni (KED)  | 0.812 ppb             | 0.7 %             |
| 59Co (KED)  | 0.067 ppb             | 5.8 %             |
| 63Cu (KED)  | 2.513 ppb             | 0.5 %             |
| 64Zn (KED)  | 58.835 ppb            | 2.2 %             |
| 69Ga (KED)  | 0.581 ppb             | 2.0 %             |
| 75As (KED)  | 0.087 ppb             | 9.8 %             |
| 80Se (KED)  | -3.425 ppb            | 4.1 %             |
| 85Rb (KED)  | 1.925 ppb             | 4.5 %             |
| 88Sr (KED)  | 2.728 ppb             | 1.1 %             |
| 89Y (KED)   | 180.286 %             | 1.0 %             |
| 107Ag (KED) | 0.012 ppb             | 2.3 %             |
| 114Cd (KED) | 0.019 ppb             | 7.3 %             |
| 115In (KED) | 174.821 %             | 0.5 %             |
| 133Cs (KED) | 0.027 ppb             | 11.3 %            |
| 138Ba (KED) | 2.129 ppb             | 1.6 %             |
| 139La (KED) | 0.129 ppb             | 1.1 %             |
| 140Ce (KED) | 0.388 ppb             | 1.0 %             |
| 141Pr (KED) | 0.031 ppb             | 0.9 %             |
| 142Nd (KED) | 0.203 ppb             | 3.4 %             |
| 152Sm (KED) | 0.021 ppb             | 1.4 %             |
| 153Eu (KED) | 0.004 ppb             | 16.9 %            |
| 158Gd (KED) | 0.018 ppb             | 4.1 %             |
| 159Tb (KED) | 187.017 %             | 1.5 %             |
| 164Dy (KED) | 0.013 ppb             | 1.5 %             |
| 166Er (KED) | 0.010 ppb             | 9.9 %             |
| 169Tm (KED) | 0.001 ppb             | 3.2 %             |
| 174Yb (KED) | 0.005 ppb             | 8.2 %             |
| 175Lu (KED) | -0.013 ppb            | 16.7 %            |
| 205Tl (KED) | 0.003 ppb             | 7.9 %             |
| 208Pb (KED) | 0.215 ppb             | 2.7 %             |
| 209Bi (KED) | 173.190 %             | 1.1 %             |
| 232Th (KED) | 0.035 ppb             | 3.2 %             |
| 238U (KED)  | 0.008 ppb             | 3.9 %             |

| Category   | Concentration average | Intensity average | Intensity RSD |
|------------|-----------------------|-------------------|---------------|
| 6Li (KED)  | 183.399 %             | 3,827 cps         | 4.8 %         |
| 9Be (KED)  | 0.000 ppb             | 0 cps             |               |
| 11B (KED)  | -1.636 ppb            | 1,277 cps         | 4.6 %         |
| 24Mg (KED) | 204.294 ppb           | 181,132 cps       | 0.8 %         |
| 27Al (KED) | 110.230 ppb           | 29,002 cps        | 1.1 %         |

| Category    | Concentration average | Intensity average | Intensity RSD |
|-------------|-----------------------|-------------------|---------------|
| 45Sc (KED)  | 188.426 %             | 80,692 cps        | 1.1 %         |
| 51V (KED)   | 0.226 ppb             | 2,884 cps         | 3.7 %         |
| 52Cr (KED)  | 1.479 ppb             | 28,991 cps        | 1.0 %         |
| 55Mn (KED)  | 6.115 ppb             | 67,430 cps        | 2.3 %         |
| 56Fe (KED)  | 138.386 ppb           | 2,515,105 cps     | 0.7 %         |
| 58Ni (KED)  | 0.812 ppb             | 17,965 cps        | 0.5 %         |
| 59Co (KED)  | 0.067 ppb             | 2,428 cps         | 4.8 %         |
| 63Cu (KED)  | 2.513 ppb             | 62,619 cps        | 1.0 %         |
| 64Zn (KED)  | 58.835 ppb            | 471,466 cps       | 1.5 %         |
| 69Ga (KED)  | 0.581 ppb             | 5,851 cps         | 1.8 %         |
| 75As (KED)  | 0.087 ppb             | 216 cps           | 9.4 %         |
| 80Se (KED)  | -3.425 ppb            | 3,067 cps         | 3.0 %         |
| 85Rb (KED)  | 1.925 ppb             | 17,962 cps        | 4.4 %         |
| 88Sr (KED)  | 2.728 ppb             | 37,328 cps        | 0.8 %         |
| 89Y (KED)   | 180.286 %             | 640,678 cps       | 1.0 %         |
| 107Ag (KED) | 0.012 ppb             | 766 cps           | 2.6 %         |
| 114Cd (KED) | 0.019 ppb             | 556 cps           | 6.3 %         |
| 115In (KED) | 174.821 %             | 1,109,216 cps     | 0.5 %         |
| 133Cs (KED) | 0.027 ppb             | 1,183 cps         | 10.5 %        |
| 138Ba (KED) | 2.129 ppb             | 122,906 cps       | 1.7 %         |
| 139La (KED) | 0.129 ppb             | 14,976 cps        | 0.7 %         |
| 140Ce (KED) | 0.388 ppb             | 56,992 cps        | 1.4 %         |
| 141Pr (KED) | 0.031 ppb             | 4,929 cps         | 2.3 %         |
| 142Nd (KED) | 0.203 ppb             | 12,699 cps        | 4.6 %         |
| 152Sm (KED) | 0.021 ppb             | 1,159 cps         | 3.0 %         |
| 153Eu (KED) | 0.004 ppb             | 472 cps           | 17.5 %        |
| 158Gd (KED) | 0.018 ppb             | 1,196 cps         | 2.8 %         |
| 159Tb (KED) | 187.017 %             | 4,928,022 cps     | 1.5 %         |
| 164Dy (KED) | 0.013 ppb             | 1,002 cps         | 3.0 %         |
| 166Er (KED) | 0.010 ppb             | 1,348 cps         | 5.3 %         |
| 169Tm (KED) | 0.001 ppb             | 278 cps           | 1.8 %         |
| 174Yb (KED) | 0.005 ppb             | 531 cps           | 8.9 %         |
| 175Lu (KED) | -0.013 ppb            | 20,749 cps        | 3.6 %         |
| 205Tl (KED) | 0.003 ppb             | 678 cps           | 8.4 %         |
| 208Pb (KED) | 0.215 ppb             | 36,061 cps        | 1.7 %         |
| 209Bi (KED) | 173.190 %             | 3,864,975 cps     | 1.1 %         |
| 232Th (KED) | 0.035 ppb             | 10,030 cps        | 3.6 %         |
| 238U (KED)  | 0.008 ppb             | 2,598 cps         | 4.2 %         |

## Sample Summary

Instrument ID: iCAP Q

Analysis index: 18

Analysis name: 0939jian

Analysis started at: 10/14/2021 12:19:48 PM

User name: WINDOWS-UPCI4ER\Administrator

| Category    | Concentration average | Concentration RSD |
|-------------|-----------------------|-------------------|
| 6Li (KED)   | 182.654 %             | 0.7 %             |
| 9Be (KED)   | 0.005 ppb             | 173.2 %           |
| 11B (KED)   | 3.628 ppb             | 21.2 %            |
| 24Mg (KED)  | 221.518 ppb           | 0.3 %             |
| 27Al (KED)  | 148.642 ppb           | 2.1 %             |
| 45Sc (KED)  | 185.306 %             | 0.8 %             |
| 51V (KED)   | 0.305 ppb             | 2.3 %             |
| 52Cr (KED)  | 1.705 ppb             | 0.9 %             |
| 55Mn (KED)  | 7.734 ppb             | 0.8 %             |
| 56Fe (KED)  | 180.982 ppb           | 1.0 %             |
| 58Ni (KED)  | 1.329 ppb             | 1.6 %             |
| 59Co (KED)  | 0.087 ppb             | 5.2 %             |
| 63Cu (KED)  | 2.294 ppb             | 1.0 %             |
| 64Zn (KED)  | 50.950 ppb            | 1.1 %             |
| 69Ga (KED)  | 0.777 ppb             | 1.3 %             |
| 75As (KED)  | 0.101 ppb             | 5.8 %             |
| 80Se (KED)  | -3.215 ppb            | 7.1 %             |
| 85Rb (KED)  | 1.369 ppb             | 0.8 %             |
| 88Sr (KED)  | 3.381 ppb             | 2.7 %             |
| 89Y (KED)   | 179.620 %             | 0.4 %             |
| 107Ag (KED) | 0.016 ppb             | 6.5 %             |
| 114Cd (KED) | 0.018 ppb             | 6.6 %             |
| 115In (KED) | 174.161 %             | 2.4 %             |
| 133Cs (KED) | 0.026 ppb             | 6.7 %             |
| 138Ba (KED) | 2.774 ppb             | 3.0 %             |
| 139La (KED) | 0.170 ppb             | 3.0 %             |
| 140Ce (KED) | 0.448 ppb             | 3.3 %             |
| 141Pr (KED) | 0.040 ppb             | 4.5 %             |
| 142Nd (KED) | 0.246 ppb             | 2.2 %             |
| 152Sm (KED) | 0.026 ppb             | 6.4 %             |
| 153Eu (KED) | 0.006 ppb             | 6.5 %             |
| 158Gd (KED) | 0.024 ppb             | 4.8 %             |
| 159Tb (KED) | 186.289 %             | 2.4 %             |
| 164Dy (KED) | 0.016 ppb             | 7.4 %             |
| 166Er (KED) | 0.011 ppb             | 14.5 %            |
| 169Tm (KED) | 0.001 ppb             | 21.7 %            |
| 174Yb (KED) | 0.007 ppb             | 5.1 %             |
| 175Lu (KED) | -0.012 ppb            | 40.2 %            |
| 205Tl (KED) | 0.004 ppb             | 7.6 %             |
| 208Pb (KED) | 0.250 ppb             | 0.3 %             |
| 209Bi (KED) | 168.354 %             | 1.6 %             |
| 232Th (KED) | 0.050 ppb             | 2.7 %             |
| 238U (KED)  | 0.011 ppb             | 2.9 %             |

| Category   | Concentration average | Intensity average | Intensity RSD |
|------------|-----------------------|-------------------|---------------|
| 6Li (KED)  | 182.654 %             | 3,812 cps         | 0.7 %         |
| 9Be (KED)  | 0.005 ppb             | 1 cps             | 173.2 %       |
| 11B (KED)  | 3.628 ppb             | 1,855 cps         | 5.2 %         |
| 24Mg (KED) | 221.518 ppb           | 195,943 cps       | 0.9 %         |
| 27Al (KED) | 148.642 ppb           | 38,412 cps        | 1.8 %         |

| Category    | Concentration average | Intensity average | Intensity RSD |
|-------------|-----------------------|-------------------|---------------|
| 45Sc (KED)  | 185.306 %             | 79,356 cps        | 0.8 %         |
| 51V (KED)   | 0.305 ppb             | 3,813 cps         | 1.7 %         |
| 52Cr (KED)  | 1.705 ppb             | 32,825 cps        | 1.3 %         |
| 55Mn (KED)  | 7.734 ppb             | 83,826 cps        | 0.6 %         |
| 56Fe (KED)  | 180.982 ppb           | 3,233,820 cps     | 1.1 %         |
| 58Ni (KED)  | 1.329 ppb             | 28,618 cps        | 2.0 %         |
| 59Co (KED)  | 0.087 ppb             | 3,112 cps         | 5.9 %         |
| 63Cu (KED)  | 2.294 ppb             | 57,011 cps        | 0.7 %         |
| 64Zn (KED)  | 50.950 ppb            | 407,016 cps       | 1.2 %         |
| 69Ga (KED)  | 0.777 ppb             | 7,778 cps         | 0.9 %         |
| 75As (KED)  | 0.101 ppb             | 247 cps           | 5.4 %         |
| 80Se (KED)  | -3.215 ppb            | 3,212 cps         | 5.1 %         |
| 85Rb (KED)  | 1.369 ppb             | 12,734 cps        | 0.5 %         |
| 88Sr (KED)  | 3.381 ppb             | 46,070 cps        | 2.4 %         |
| 89Y (KED)   | 179.620 %             | 638,308 cps       | 0.4 %         |
| 107Ag (KED) | 0.016 ppb             | 1,026 cps         | 5.0 %         |
| 114Cd (KED) | 0.018 ppb             | 537 cps           | 6.5 %         |
| 115In (KED) | 174.161 %             | 1,105,026 cps     | 2.4 %         |
| 133Cs (KED) | 0.026 ppb             | 1,166 cps         | 4.3 %         |
| 138Ba (KED) | 2.774 ppb             | 159,084 cps       | 0.7 %         |
| 139La (KED) | 0.170 ppb             | 19,607 cps        | 1.4 %         |
| 140Ce (KED) | 0.448 ppb             | 65,542 cps        | 1.5 %         |
| 141Pr (KED) | 0.040 ppb             | 6,334 cps         | 2.4 %         |
| 142Nd (KED) | 0.246 ppb             | 15,299 cps        | 0.8 %         |
| 152Sm (KED) | 0.026 ppb             | 1,426 cps         | 5.6 %         |
| 153Eu (KED) | 0.006 ppb             | 661 cps           | 7.4 %         |
| 158Gd (KED) | 0.024 ppb             | 1,598 cps         | 7.1 %         |
| 159Tb (KED) | 186.289 %             | 4,908,828 cps     | 2.4 %         |
| 164Dy (KED) | 0.016 ppb             | 1,280 cps         | 8.6 %         |
| 166Er (KED) | 0.011 ppb             | 1,396 cps         | 8.2 %         |
| 169Tm (KED) | 0.001 ppb             | 332 cps           | 22.1 %        |
| 174Yb (KED) | 0.007 ppb             | 737 cps           | 6.4 %         |
| 175Lu (KED) | -0.012 ppb            | 20,948 cps        | 2.2 %         |
| 205Tl (KED) | 0.004 ppb             | 732 cps           | 6.4 %         |
| 208Pb (KED) | 0.250 ppb             | 39,845 cps        | 1.8 %         |
| 209Bi (KED) | 168.354 %             | 3,757,057 cps     | 1.6 %         |
| 232Th (KED) | 0.050 ppb             | 13,779 cps        | 2.6 %         |
| 238U (KED)  | 0.011 ppb             | 3,268 cps         | 1.6 %         |

## Sample Summary

Instrument ID: iCAP Q

Analysis index: 19

Analysis name: 2819ti

Analysis started at: 10/14/2021 12:23:51 PM

User name: WINDOWS-UPCI4ER\Administrator

| Category    | Concentration average | Concentration RSD |
|-------------|-----------------------|-------------------|
| 6Li (KED)   | 186.435 %             | 3.7 %             |
| 9Be (KED)   | 0.010 ppb             | 86.6 %            |
| 11B (KED)   | -4.305 ppb            | 8.5 %             |
| 24Mg (KED)  | 118.041 ppb           | 4.9 %             |
| 27Al (KED)  | 87.219 ppb            | 1.9 %             |
| 45Sc (KED)  | 182.757 %             | 0.5 %             |
| 51V (KED)   | 0.201 ppb             | 1.7 %             |
| 52Cr (KED)  | 0.322 ppb             | 1.6 %             |
| 55Mn (KED)  | 2.999 ppb             | 1.8 %             |
| 56Fe (KED)  | 103.808 ppb           | 0.5 %             |
| 58Ni (KED)  | 0.729 ppb             | 0.3 %             |
| 59Co (KED)  | 0.047 ppb             | 7.2 %             |
| 63Cu (KED)  | 1.977 ppb             | 0.2 %             |
| 64Zn (KED)  | 51.752 ppb            | 2.3 %             |
| 69Ga (KED)  | 0.435 ppb             | 2.3 %             |
| 75As (KED)  | 0.084 ppb             | 10.4 %            |
| 80Se (KED)  | -3.322 ppb            | 5.0 %             |
| 85Rb (KED)  | 0.782 ppb             | 1.2 %             |
| 88Sr (KED)  | 2.233 ppb             | 1.0 %             |
| 89Y (KED)   | 176.392 %             | 0.6 %             |
| 107Ag (KED) | 0.014 ppb             | 7.8 %             |
| 114Cd (KED) | 0.007 ppb             | 20.6 %            |
| 115In (KED) | 172.859 %             | 0.1 %             |
| 133Cs (KED) | 0.018 ppb             | 8.8 %             |
| 138Ba (KED) | 1.510 ppb             | 0.8 %             |
| 139La (KED) | 0.126 ppb             | 2.6 %             |
| 140Ce (KED) | 0.350 ppb             | 28.0 %            |
| 141Pr (KED) | 0.031 ppb             | 3.6 %             |
| 142Nd (KED) | 0.175 ppb             | 2.9 %             |
| 152Sm (KED) | 0.021 ppb             | 9.7 %             |
| 153Eu (KED) | 0.003 ppb             | 6.1 %             |
| 158Gd (KED) | 0.017 ppb             | 3.6 %             |
| 159Tb (KED) | 186.020 %             | 1.7 %             |
| 164Dy (KED) | 0.012 ppb             | 2.3 %             |
| 166Er (KED) | 0.005 ppb             | 9.0 %             |
| 169Tm (KED) | 0.001 ppb             | 15.4 %            |
| 174Yb (KED) | 0.004 ppb             | 8.0 %             |
| 175Lu (KED) | -0.015 ppb            | 15.3 %            |
| 205Tl (KED) | 0.003 ppb             | 12.1 %            |
| 208Pb (KED) | 0.199 ppb             | 1.4 %             |
| 209Bi (KED) | 168.676 %             | 0.8 %             |
| 232Th (KED) | 0.042 ppb             | 4.3 %             |
| 238U (KED)  | 0.008 ppb             | 5.1 %             |

| Category   | Concentration average | Intensity average | Intensity RSD |
|------------|-----------------------|-------------------|---------------|
| 6Li (KED)  | 186.435 %             | 3,891 cps         | 3.7 %         |
| 9Be (KED)  | 0.010 ppb             | 2 cps             | 86.6 %        |
| 11B (KED)  | -4.305 ppb            | 998 cps           | 0.7 %         |
| 24Mg (KED) | 118.041 ppb           | 106,540 cps       | 1.6 %         |
| 27Al (KED) | 87.219 ppb            | 22,290 cps        | 1.9 %         |

| Category    | Concentration average | Intensity average | Intensity RSD |
|-------------|-----------------------|-------------------|---------------|
| 45Sc (KED)  | 182.757 %             | 78,265 cps        | 0.5 %         |
| 51V (KED)   | 0.201 ppb             | 2,488 cps         | 1.3 %         |
| 52Cr (KED)  | 0.322 ppb             | 6,319 cps         | 2.0 %         |
| 55Mn (KED)  | 2.999 ppb             | 32,208 cps        | 1.6 %         |
| 56Fe (KED)  | 103.808 ppb           | 1,831,188 cps     | 0.1 %         |
| 58Ni (KED)  | 0.729 ppb             | 15,681 cps        | 0.6 %         |
| 59Co (KED)  | 0.047 ppb             | 1,663 cps         | 7.4 %         |
| 63Cu (KED)  | 1.977 ppb             | 48,340 cps        | 0.8 %         |
| 64Zn (KED)  | 51.752 ppb            | 405,937 cps       | 1.7 %         |
| 69Ga (KED)  | 0.435 ppb             | 4,301 cps         | 2.0 %         |
| 75As (KED)  | 0.084 ppb             | 204 cps           | 9.0 %         |
| 80Se (KED)  | -3.322 ppb            | 3,076 cps         | 4.0 %         |
| 85Rb (KED)  | 0.782 ppb             | 7,161 cps         | 1.3 %         |
| 88Sr (KED)  | 2.233 ppb             | 29,915 cps        | 0.5 %         |
| 89Y (KED)   | 176.392 %             | 626,838 cps       | 0.6 %         |
| 107Ag (KED) | 0.014 ppb             | 891 cps           | 7.2 %         |
| 114Cd (KED) | 0.007 ppb             | 263 cps           | 14.6 %        |
| 115In (KED) | 172.859 %             | 1,096,767 cps     | 0.1 %         |
| 133Cs (KED) | 0.018 ppb             | 799 cps           | 8.6 %         |
| 138Ba (KED) | 1.510 ppb             | 87,118 cps        | 1.9 %         |
| 139La (KED) | 0.126 ppb             | 14,438 cps        | 1.5 %         |
| 140Ce (KED) | 0.350 ppb             | 51,078 cps        | 26.1 %        |
| 141Pr (KED) | 0.031 ppb             | 4,913 cps         | 2.9 %         |
| 142Nd (KED) | 0.175 ppb             | 10,871 cps        | 4.1 %         |
| 152Sm (KED) | 0.021 ppb             | 1,122 cps         | 8.2 %         |
| 153Eu (KED) | 0.003 ppb             | 360 cps           | 5.6 %         |
| 158Gd (KED) | 0.017 ppb             | 1,163 cps         | 4.3 %         |
| 159Tb (KED) | 186.020 %             | 4,901,752 cps     | 1.7 %         |
| 164Dy (KED) | 0.012 ppb             | 953 cps           | 3.8 %         |
| 166Er (KED) | 0.005 ppb             | 886 cps           | 3.0 %         |
| 169Tm (KED) | 0.001 ppb             | 227 cps           | 15.5 %        |
| 174Yb (KED) | 0.004 ppb             | 464 cps           | 7.2 %         |
| 175Lu (KED) | -0.015 ppb            | 20,329 cps        | 1.2 %         |
| 205Tl (KED) | 0.003 ppb             | 537 cps           | 12.1 %        |
| 208Pb (KED) | 0.199 ppb             | 32,993 cps        | 0.5 %         |
| 209Bi (KED) | 168.676 %             | 3,764,236 cps     | 0.8 %         |
| 232Th (KED) | 0.042 ppb             | 11,499 cps        | 3.6 %         |
| 238U (KED)  | 0.008 ppb             | 2,594 cps         | 4.2 %         |

## Sample Summary

Instrument ID: iCAP Q

Analysis index: 20

Analysis name: 2847ti

Analysis started at: 10/14/2021 12:27:45 PM

User name: WINDOWS-UPCI4ER\Administrator

| Category    | Concentration average | Concentration RSD |
|-------------|-----------------------|-------------------|
| 6Li (KED)   | 182.814 %             | 3.8 %             |
| 9Be (KED)   | 0.015 ppb             | 173.2 %           |
| 11B (KED)   | -4.255 ppb            | 32.3 %            |
| 24Mg (KED)  | 98.752 ppb            | 3.4 %             |
| 27Al (KED)  | 62.715 ppb            | 2.0 %             |
| 45Sc (KED)  | 180.157 %             | 0.7 %             |
| 51V (KED)   | 0.135 ppb             | 6.7 %             |
| 52Cr (KED)  | 0.277 ppb             | 2.3 %             |
| 55Mn (KED)  | 2.189 ppb             | 1.4 %             |
| 56Fe (KED)  | 71.499 ppb            | 0.9 %             |
| 58Ni (KED)  | 0.438 ppb             | 1.9 %             |
| 59Co (KED)  | 0.031 ppb             | 2.2 %             |
| 63Cu (KED)  | 2.129 ppb             | 3.3 %             |
| 64Zn (KED)  | 52.187 ppb            | 2.4 %             |
| 69Ga (KED)  | 0.399 ppb             | 2.4 %             |
| 75As (KED)  | 0.050 ppb             | 16.7 %            |
| 80Se (KED)  | -3.289 ppb            | 8.3 %             |
| 85Rb (KED)  | 0.495 ppb             | 4.1 %             |
| 88Sr (KED)  | 2.020 ppb             | 2.0 %             |
| 89Y (KED)   | 175.473 %             | 1.3 %             |
| 107Ag (KED) | 0.011 ppb             | 4.5 %             |
| 114Cd (KED) | 0.008 ppb             | 21.1 %            |
| 115In (KED) | 171.257 %             | 0.4 %             |
| 133Cs (KED) | 0.012 ppb             | 17.0 %            |
| 138Ba (KED) | 1.443 ppb             | 2.2 %             |
| 139La (KED) | 0.062 ppb             | 4.7 %             |
| 140Ce (KED) | 0.618 ppb             | 112.1 %           |
| 141Pr (KED) | 0.014 ppb             | 6.4 %             |
| 142Nd (KED) | 0.104 ppb             | 0.3 %             |
| 152Sm (KED) | 0.011 ppb             | 10.3 %            |
| 153Eu (KED) | 0.002 ppb             | 18.8 %            |
| 158Gd (KED) | 0.010 ppb             | 7.8 %             |
| 159Tb (KED) | 182.712 %             | 0.4 %             |
| 164Dy (KED) | 0.007 ppb             | 9.7 %             |
| 166Er (KED) | 0.006 ppb             | 7.7 %             |
| 169Tm (KED) | 0.000 ppb             | 10.8 %            |
| 174Yb (KED) | 0.003 ppb             | 10.1 %            |
| 175Lu (KED) | -0.015 ppb            | 25.4 %            |
| 205Tl (KED) | 0.002 ppb             | 8.2 %             |
| 208Pb (KED) | 0.103 ppb             | 1.7 %             |
| 209Bi (KED) | 165.180 %             | 0.4 %             |
| 232Th (KED) | 0.021 ppb             | 3.0 %             |
| 238U (KED)  | 0.005 ppb             | 3.2 %             |

| Category   | Concentration average | Intensity average | Intensity RSD |
|------------|-----------------------|-------------------|---------------|
| 6Li (KED)  | 182.814 %             | 3,815 cps         | 3.8 %         |
| 9Be (KED)  | 0.015 ppb             | 3 cps             | 173.2 %       |
| 11B (KED)  | -4.255 ppb            | 981 cps           | 11.6 %        |
| 24Mg (KED) | 98.752 ppb            | 87,456 cps        | 0.7 %         |
| 27Al (KED) | 62.715 ppb            | 15,839 cps        | 1.4 %         |

| Category    | Concentration average | Intensity average | Intensity RSD |
|-------------|-----------------------|-------------------|---------------|
| 45Sc (KED)  | 180.157 %             | 77,151 cps        | 0.7 %         |
| 51V (KED)   | 0.135 ppb             | 1,643 cps         | 6.4 %         |
| 52Cr (KED)  | 0.277 ppb             | 5,397 cps         | 2.6 %         |
| 55Mn (KED)  | 2.189 ppb             | 23,244 cps        | 2.1 %         |
| 56Fe (KED)  | 71.499 ppb            | 1,244,640 cps     | 0.8 %         |
| 58Ni (KED)  | 0.438 ppb             | 9,461 cps         | 2.4 %         |
| 59Co (KED)  | 0.031 ppb             | 1,110 cps         | 2.2 %         |
| 63Cu (KED)  | 2.129 ppb             | 51,709 cps        | 2.2 %         |
| 64Zn (KED)  | 52.187 ppb            | 407,239 cps       | 2.8 %         |
| 69Ga (KED)  | 0.399 ppb             | 3,936 cps         | 1.5 %         |
| 75As (KED)  | 0.050 ppb             | 129 cps           | 14.9 %        |
| 80Se (KED)  | -3.289 ppb            | 3,083 cps         | 5.3 %         |
| 85Rb (KED)  | 0.495 ppb             | 4,522 cps         | 2.8 %         |
| 88Sr (KED)  | 2.020 ppb             | 26,941 cps        | 1.6 %         |
| 89Y (KED)   | 175.473 %             | 623,573 cps       | 1.3 %         |
| 107Ag (KED) | 0.011 ppb             | 727 cps           | 4.4 %         |
| 114Cd (KED) | 0.008 ppb             | 271 cps           | 14.7 %        |
| 115In (KED) | 171.257 %             | 1,086,600 cps     | 0.4 %         |
| 133Cs (KED) | 0.012 ppb             | 520 cps           | 15.5 %        |
| 138Ba (KED) | 1.443 ppb             | 81,778 cps        | 2.4 %         |
| 139La (KED) | 0.062 ppb             | 6,971 cps         | 4.9 %         |
| 140Ce (KED) | 0.618 ppb             | 88,594 cps        | 111.9 %       |
| 141Pr (KED) | 0.014 ppb             | 2,206 cps         | 6.7 %         |
| 142Nd (KED) | 0.104 ppb             | 6,363 cps         | 0.6 %         |
| 152Sm (KED) | 0.011 ppb             | 592 cps           | 10.5 %        |
| 153Eu (KED) | 0.002 ppb             | 231 cps           | 18.1 %        |
| 158Gd (KED) | 0.010 ppb             | 670 cps           | 7.8 %         |
| 159Tb (KED) | 182.712 %             | 4,814,597 cps     | 0.4 %         |
| 164Dy (KED) | 0.007 ppb             | 527 cps           | 9.8 %         |
| 166Er (KED) | 0.006 ppb             | 926 cps           | 4.4 %         |
| 169Tm (KED) | 0.000 ppb             | 146 cps           | 9.5 %         |
| 174Yb (KED) | 0.003 ppb             | 347 cps           | 9.3 %         |
| 175Lu (KED) | -0.015 ppb            | 19,885 cps        | 3.7 %         |
| 205Tl (KED) | 0.002 ppb             | 421 cps           | 8.1 %         |
| 208Pb (KED) | 0.103 ppb             | 19,756 cps        | 1.0 %         |
| 209Bi (KED) | 165.180 %             | 3,686,209 cps     | 0.4 %         |
| 232Th (KED) | 0.021 ppb             | 5,812 cps         | 3.0 %         |
| 238U (KED)  | 0.005 ppb             | 1,676 cps         | 3.0 %         |

## Sample Summary

Instrument ID: iCAP Q

Analysis index: 21

Analysis name: 073ti

Analysis started at: 10/14/2021 12:31:25 PM

User name: WINDOWS-UPCI4ER\Administrator

| Category    | Concentration average | Concentration RSD |
|-------------|-----------------------|-------------------|
| 6Li (KED)   | 185.104 %             | 2.7 %             |
| 9Be (KED)   | 0.000 ppb             |                   |
| 11B (KED)   | -3.662 ppb            | 17.7 %            |
| 24Mg (KED)  | 101.784 ppb           | 3.0 %             |
| 27Al (KED)  | 71.282 ppb            | 1.3 %             |
| 45Sc (KED)  | 179.483 %             | 0.4 %             |
| 51V (KED)   | 0.140 ppb             | 4.3 %             |
| 52Cr (KED)  | 0.379 ppb             | 2.9 %             |
| 55Mn (KED)  | 3.408 ppb             | 1.1 %             |
| 56Fe (KED)  | 82.434 ppb            | 0.3 %             |
| 58Ni (KED)  | 0.453 ppb             | 2.2 %             |
| 59Co (KED)  | 0.037 ppb             | 5.3 %             |
| 63Cu (KED)  | 2.570 ppb             | 1.9 %             |
| 64Zn (KED)  | 52.562 ppb            | 1.6 %             |
| 69Ga (KED)  | 0.360 ppb             | 3.7 %             |
| 75As (KED)  | 0.058 ppb             | 20.0 %            |
| 80Se (KED)  | -3.343 ppb            | 3.1 %             |
| 85Rb (KED)  | 1.308 ppb             | 1.8 %             |
| 88Sr (KED)  | 1.457 ppb             | 1.7 %             |
| 89Y (KED)   | 177.670 %             | 1.7 %             |
| 107Ag (KED) | 0.015 ppb             | 12.7 %            |
| 114Cd (KED) | 0.008 ppb             | 24.1 %            |
| 115In (KED) | 172.522 %             | 1.5 %             |
| 133Cs (KED) | 0.013 ppb             | 8.2 %             |
| 138Ba (KED) | 1.365 ppb             | 0.6 %             |
| 139La (KED) | 0.094 ppb             | 0.6 %             |
| 140Ce (KED) | 0.270 ppb             | 7.0 %             |
| 141Pr (KED) | 0.023 ppb             | 2.0 %             |
| 142Nd (KED) | 0.142 ppb             | 7.9 %             |
| 152Sm (KED) | 0.015 ppb             | 9.2 %             |
| 153Eu (KED) | 0.003 ppb             | 7.8 %             |
| 158Gd (KED) | 0.013 ppb             | 3.5 %             |
| 159Tb (KED) | 182.972 %             | 0.8 %             |
| 164Dy (KED) | 0.009 ppb             | 3.3 %             |
| 166Er (KED) | 0.004 ppb             | 12.3 %            |
| 169Tm (KED) | 0.000 ppb             | 10.5 %            |
| 174Yb (KED) | 0.003 ppb             | 11.0 %            |
| 175Lu (KED) | -0.015 ppb            | 21.7 %            |
| 205Tl (KED) | 0.003 ppb             | 12.1 %            |
| 208Pb (KED) | 0.152 ppb             | 3.5 %             |
| 209Bi (KED) | 167.833 %             | 1.3 %             |
| 232Th (KED) | 0.029 ppb             | 3.2 %             |
| 238U (KED)  | 0.006 ppb             | 3.1 %             |

| Category   | Concentration average | Intensity average | Intensity RSD |
|------------|-----------------------|-------------------|---------------|
| 6Li (KED)  | 185.104 %             | 3,863 cps         | 2.7 %         |
| 9Be (KED)  | 0.000 ppb             | 0 cps             |               |
| 11B (KED)  | -3.662 ppb            | 1,062 cps         | 4.2 %         |
| 24Mg (KED) | 101.784 ppb           | 91,292 cps        | 0.3 %         |
| 27Al (KED) | 71.282 ppb            | 17,917 cps        | 1.4 %         |

| Category    | Concentration average | Intensity average | Intensity RSD |
|-------------|-----------------------|-------------------|---------------|
| 45Sc (KED)  | 179.483 %             | 76,863 cps        | 0.4 %         |
| 51V (KED)   | 0.140 ppb             | 1,706 cps         | 4.6 %         |
| 52Cr (KED)  | 0.379 ppb             | 7,261 cps         | 2.5 %         |
| 55Mn (KED)  | 3.408 ppb             | 35,909 cps        | 0.7 %         |
| 56Fe (KED)  | 82.434 ppb            | 1,429,013 cps     | 0.7 %         |
| 58Ni (KED)  | 0.453 ppb             | 9,733 cps         | 1.8 %         |
| 59Co (KED)  | 0.037 ppb             | 1,302 cps         | 4.7 %         |
| 63Cu (KED)  | 2.570 ppb             | 63,090 cps        | 0.8 %         |
| 64Zn (KED)  | 52.562 ppb            | 415,256 cps       | 1.6 %         |
| 69Ga (KED)  | 0.360 ppb             | 3,601 cps         | 3.2 %         |
| 75As (KED)  | 0.058 ppb             | 149 cps           | 17.1 %        |
| 80Se (KED)  | -3.343 ppb            | 3,083 cps         | 1.0 %         |
| 85Rb (KED)  | 1.308 ppb             | 12,043 cps        | 0.4 %         |
| 88Sr (KED)  | 1.457 ppb             | 19,708 cps        | 1.4 %         |
| 89Y (KED)   | 177.670 %             | 631,381 cps       | 1.7 %         |
| 107Ag (KED) | 0.015 ppb             | 940 cps           | 12.0 %        |
| 114Cd (KED) | 0.008 ppb             | 290 cps           | 19.2 %        |
| 115In (KED) | 172.522 %             | 1,094,626 cps     | 1.5 %         |
| 133Cs (KED) | 0.013 ppb             | 570 cps           | 9.1 %         |
| 138Ba (KED) | 1.365 ppb             | 77,537 cps        | 1.2 %         |
| 139La (KED) | 0.094 ppb             | 10,695 cps        | 0.5 %         |
| 140Ce (KED) | 0.270 ppb             | 38,833 cps        | 6.7 %         |
| 141Pr (KED) | 0.023 ppb             | 3,525 cps         | 2.6 %         |
| 142Nd (KED) | 0.142 ppb             | 8,712 cps         | 8.6 %         |
| 152Sm (KED) | 0.015 ppb             | 803 cps           | 8.6 %         |
| 153Eu (KED) | 0.003 ppb             | 308 cps           | 8.4 %         |
| 158Gd (KED) | 0.013 ppb             | 867 cps           | 2.7 %         |
| 159Tb (KED) | 182.972 %             | 4,821,430 cps     | 0.8 %         |
| 164Dy (KED) | 0.009 ppb             | 707 cps           | 2.9 %         |
| 166Er (KED) | 0.004 ppb             | 804 cps           | 6.6 %         |
| 169Tm (KED) | 0.000 ppb             | 164 cps           | 8.4 %         |
| 174Yb (KED) | 0.003 ppb             | 348 cps           | 10.5 %        |
| 175Lu (KED) | -0.015 ppb            | 19,994 cps        | 4.0 %         |
| 205Tl (KED) | 0.003 ppb             | 482 cps           | 11.2 %        |
| 208Pb (KED) | 0.152 ppb             | 26,630 cps        | 3.2 %         |
| 209Bi (KED) | 167.833 %             | 3,745,425 cps     | 1.3 %         |
| 232Th (KED) | 0.029 ppb             | 7,905 cps         | 2.1 %         |
| 238U (KED)  | 0.006 ppb             | 1,990 cps         | 3.6 %         |

## Sample Summary

Instrument ID: iCAP Q

Analysis index: 22

Analysis name: 075ti

Analysis started at: 10/14/2021 12:35:17 PM

User name: WINDOWS-UPCI4ER\Administrator

| Category    | Concentration average | Concentration RSD |
|-------------|-----------------------|-------------------|
| 6Li (KED)   | 187.554 %             | 1.6 %             |
| 9Be (KED)   | 0.005 ppb             | 173.2 %           |
| 11B (KED)   | 0.496 ppb             | 81.5 %            |
| 24Mg (KED)  | 127.704 ppb           | 1.3 %             |
| 27Al (KED)  | 117.214 ppb           | 2.4 %             |
| 45Sc (KED)  | 177.160 %             | 0.2 %             |
| 51V (KED)   | 0.213 ppb             | 1.9 %             |
| 52Cr (KED)  | 1.172 ppb             | 1.9 %             |
| 55Mn (KED)  | 4.657 ppb             | 0.6 %             |
| 56Fe (KED)  | 133.608 ppb           | 1.3 %             |
| 58Ni (KED)  | 0.924 ppb             | 1.4 %             |
| 59Co (KED)  | 0.064 ppb             | 2.4 %             |
| 63Cu (KED)  | 2.319 ppb             | 1.1 %             |
| 64Zn (KED)  | 52.141 ppb            | 0.8 %             |
| 69Ga (KED)  | 0.466 ppb             | 2.6 %             |
| 75As (KED)  | 0.133 ppb             | 6.2 %             |
| 80Se (KED)  | -3.225 ppb            | 5.4 %             |
| 85Rb (KED)  | 1.300 ppb             | 1.9 %             |
| 88Sr (KED)  | 1.572 ppb             | 1.8 %             |
| 89Y (KED)   | 174.786 %             | 2.1 %             |
| 107Ag (KED) | 0.016 ppb             | 2.9 %             |
| 114Cd (KED) | 0.015 ppb             | 10.0 %            |
| 115In (KED) | 168.837 %             | 0.7 %             |
| 133Cs (KED) | 0.024 ppb             | 1.2 %             |
| 138Ba (KED) | 1.579 ppb             | 0.8 %             |
| 139La (KED) | 0.202 ppb             | 0.9 %             |
| 140Ce (KED) | 0.532 ppb             | 2.4 %             |
| 141Pr (KED) | 0.045 ppb             | 2.7 %             |
| 142Nd (KED) | 0.281 ppb             | 3.0 %             |
| 152Sm (KED) | 0.028 ppb             | 4.4 %             |
| 153Eu (KED) | 0.005 ppb             | 11.1 %            |
| 158Gd (KED) | 0.023 ppb             | 3.2 %             |
| 159Tb (KED) | 183.515 %             | 1.2 %             |
| 164Dy (KED) | 0.015 ppb             | 1.6 %             |
| 166Er (KED) | 0.012 ppb             | 10.4 %            |
| 169Tm (KED) | 0.001 ppb             | 8.9 %             |
| 174Yb (KED) | 0.006 ppb             | 3.4 %             |
| 175Lu (KED) | -0.019 ppb            | 13.6 %            |
| 205Tl (KED) | 0.003 ppb             | 4.2 %             |
| 208Pb (KED) | 0.197 ppb             | 2.4 %             |
| 209Bi (KED) | 167.710 %             | 0.9 %             |
| 232Th (KED) | 0.052 ppb             | 2.1 %             |
| 238U (KED)  | 0.009 ppb             | 5.5 %             |

| Category   | Concentration average | Intensity average | Intensity RSD |
|------------|-----------------------|-------------------|---------------|
| 6Li (KED)  | 187.554 %             | 3,914 cps         | 1.6 %         |
| 9Be (KED)  | 0.005 ppb             | 1 cps             | 173.2 %       |
| 11B (KED)  | 0.496 ppb             | 1,549 cps         | 3.3 %         |
| 24Mg (KED) | 127.704 ppb           | 116,059 cps       | 1.0 %         |
| 27Al (KED) | 117.214 ppb           | 28,989 cps        | 2.1 %         |

| Category    | Concentration average | Intensity average | Intensity RSD |
|-------------|-----------------------|-------------------|---------------|
| 45Sc (KED)  | 177.160 %             | 75,868 cps        | 0.2 %         |
| 51V (KED)   | 0.213 ppb             | 2,551 cps         | 1.7 %         |
| 52Cr (KED)  | 1.172 ppb             | 21,643 cps        | 1.7 %         |
| 55Mn (KED)  | 4.657 ppb             | 48,355 cps        | 0.8 %         |
| 56Fe (KED)  | 133.608 ppb           | 2,283,559 cps     | 1.5 %         |
| 58Ni (KED)  | 0.924 ppb             | 19,152 cps        | 1.4 %         |
| 59Co (KED)  | 0.064 ppb             | 2,179 cps         | 2.2 %         |
| 63Cu (KED)  | 2.319 ppb             | 56,076 cps        | 2.7 %         |
| 64Zn (KED)  | 52.141 ppb            | 405,257 cps       | 1.7 %         |
| 69Ga (KED)  | 0.466 ppb             | 4,562 cps         | 3.7 %         |
| 75As (KED)  | 0.133 ppb             | 311 cps           | 3.8 %         |
| 80Se (KED)  | -3.225 ppb            | 3,119 cps         | 5.6 %         |
| 85Rb (KED)  | 1.300 ppb             | 11,773 cps        | 0.2 %         |
| 88Sr (KED)  | 1.572 ppb             | 20,905 cps        | 2.1 %         |
| 89Y (KED)   | 174.786 %             | 621,132 cps       | 2.1 %         |
| 107Ag (KED) | 0.016 ppb             | 993 cps           | 2.7 %         |
| 114Cd (KED) | 0.015 ppb             | 453 cps           | 8.0 %         |
| 115In (KED) | 168.837 %             | 1,071,248 cps     | 0.7 %         |
| 133Cs (KED) | 0.024 ppb             | 1,024 cps         | 1.8 %         |
| 138Ba (KED) | 1.579 ppb             | 89,770 cps        | 0.8 %         |
| 139La (KED) | 0.202 ppb             | 22,862 cps        | 1.6 %         |
| 140Ce (KED) | 0.532 ppb             | 76,682 cps        | 3.3 %         |
| 141Pr (KED) | 0.045 ppb             | 7,013 cps         | 3.9 %         |
| 142Nd (KED) | 0.281 ppb             | 17,220 cps        | 2.0 %         |
| 152Sm (KED) | 0.028 ppb             | 1,513 cps         | 3.5 %         |
| 153Eu (KED) | 0.005 ppb             | 567 cps           | 11.9 %        |
| 158Gd (KED) | 0.023 ppb             | 1,505 cps         | 3.7 %         |
| 159Tb (KED) | 183.515 %             | 4,835,732 cps     | 1.2 %         |
| 164Dy (KED) | 0.015 ppb             | 1,183 cps         | 1.8 %         |
| 166Er (KED) | 0.012 ppb             | 1,448 cps         | 7.6 %         |
| 169Tm (KED) | 0.001 ppb             | 298 cps           | 7.2 %         |
| 174Yb (KED) | 0.006 ppb             | 647 cps           | 3.1 %         |
| 175Lu (KED) | -0.019 ppb            | 19,212 cps        | 1.5 %         |
| 205Tl (KED) | 0.003 ppb             | 651 cps           | 4.3 %         |
| 208Pb (KED) | 0.197 ppb             | 32,528 cps        | 1.1 %         |
| 209Bi (KED) | 167.710 %             | 3,742,675 cps     | 0.9 %         |
| 232Th (KED) | 0.052 ppb             | 14,195 cps        | 1.3 %         |
| 238U (KED)  | 0.009 ppb             | 2,648 cps         | 4.7 %         |

## Sample Summary

Instrument ID: iCAP Q

Analysis index: 23

Analysis name: 2872ti

Analysis started at: 10/14/2021 12:39:01 PM

User name: WINDOWS-UPCI4ER\Administrator

| Category    | Concentration average | Concentration RSD |
|-------------|-----------------------|-------------------|
| 6Li (KED)   | 186.542 %             | 3.0 %             |
| 9Be (KED)   | 0.000 ppb             |                   |
| 11B (KED)   | -4.459 ppb            | 10.5 %            |
| 24Mg (KED)  | 115.297 ppb           | 4.0 %             |
| 27Al (KED)  | 76.138 ppb            | 2.9 %             |
| 45Sc (KED)  | 176.544 %             | 0.1 %             |
| 51V (KED)   | 0.161 ppb             | 4.1 %             |
| 52Cr (KED)  | 0.368 ppb             | 0.7 %             |
| 55Mn (KED)  | 3.026 ppb             | 0.8 %             |
| 56Fe (KED)  | 91.514 ppb            | 0.2 %             |
| 58Ni (KED)  | 0.465 ppb             | 1.3 %             |
| 59Co (KED)  | 0.046 ppb             | 6.9 %             |
| 63Cu (KED)  | 2.777 ppb             | 1.9 %             |
| 64Zn (KED)  | 52.570 ppb            | 1.3 %             |
| 69Ga (KED)  | 0.397 ppb             | 1.6 %             |
| 75As (KED)  | 0.058 ppb             | 22.6 %            |
| 80Se (KED)  | -3.334 ppb            | 4.4 %             |
| 85Rb (KED)  | 0.625 ppb             | 0.4 %             |
| 88Sr (KED)  | 2.230 ppb             | 2.2 %             |
| 89Y (KED)   | 174.752 %             | 1.3 %             |
| 107Ag (KED) | 0.015 ppb             | 2.6 %             |
| 114Cd (KED) | 0.013 ppb             | 2.5 %             |
| 115In (KED) | 171.895 %             | 1.2 %             |
| 133Cs (KED) | 0.015 ppb             | 13.9 %            |
| 138Ba (KED) | 1.423 ppb             | 2.8 %             |
| 139La (KED) | 0.076 ppb             | 0.7 %             |
| 140Ce (KED) | 0.209 ppb             | 2.4 %             |
| 141Pr (KED) | 0.020 ppb             | 3.7 %             |
| 142Nd (KED) | 0.116 ppb             | 2.2 %             |
| 152Sm (KED) | 0.013 ppb             | 9.6 %             |
| 153Eu (KED) | 0.002 ppb             | 5.1 %             |
| 158Gd (KED) | 0.011 ppb             | 2.8 %             |
| 159Tb (KED) | 185.894 %             | 0.8 %             |
| 164Dy (KED) | 0.009 ppb             | 4.3 %             |
| 166Er (KED) | 0.005 ppb             | 9.2 %             |
| 169Tm (KED) | 0.000 ppb             | 4.1 %             |
| 174Yb (KED) | 0.003 ppb             | 15.1 %            |
| 175Lu (KED) | -0.019 ppb            | 2.7 %             |
| 205Tl (KED) | 0.002 ppb             | 10.7 %            |
| 208Pb (KED) | 0.196 ppb             | 0.4 %             |
| 209Bi (KED) | 168.866 %             | 0.6 %             |
| 232Th (KED) | 0.023 ppb             | 4.1 %             |
| 238U (KED)  | 0.007 ppb             | 1.1 %             |

| Category   | Concentration average | Intensity average | Intensity RSD |
|------------|-----------------------|-------------------|---------------|
| 6Li (KED)  | 186.542 %             | 3,893 cps         | 3.0 %         |
| 9Be (KED)  | 0.000 ppb             | 0 cps             |               |
| 11B (KED)  | -4.459 ppb            | 981 cps           | 3.2 %         |
| 24Mg (KED) | 115.297 ppb           | 104,165 cps       | 1.3 %         |
| 27Al (KED) | 76.138 ppb            | 18,814 cps        | 2.7 %         |

| Category    | Concentration average | Intensity average | Intensity RSD |
|-------------|-----------------------|-------------------|---------------|
| 45Sc (KED)  | 176.544 %             | 75,604 cps        | 0.1 %         |
| 51V (KED)   | 0.161 ppb             | 1,921 cps         | 4.1 %         |
| 52Cr (KED)  | 0.368 ppb             | 6,934 cps         | 0.7 %         |
| 55Mn (KED)  | 3.026 ppb             | 31,391 cps        | 0.8 %         |
| 56Fe (KED)  | 91.514 ppb            | 1,559,957 cps     | 0.2 %         |
| 58Ni (KED)  | 0.465 ppb             | 9,827 cps         | 1.4 %         |
| 59Co (KED)  | 0.046 ppb             | 1,591 cps         | 6.6 %         |
| 63Cu (KED)  | 2.777 ppb             | 67,004 cps        | 1.6 %         |
| 64Zn (KED)  | 52.570 ppb            | 408,488 cps       | 0.3 %         |
| 69Ga (KED)  | 0.397 ppb             | 3,894 cps         | 2.8 %         |
| 75As (KED)  | 0.058 ppb             | 146 cps           | 18.5 %        |
| 80Se (KED)  | -3.334 ppb            | 3,038 cps         | 2.5 %         |
| 85Rb (KED)  | 0.625 ppb             | 5,679 cps         | 1.4 %         |
| 88Sr (KED)  | 2.230 ppb             | 29,601 cps        | 0.9 %         |
| 89Y (KED)   | 174.752 %             | 621,012 cps       | 1.3 %         |
| 107Ag (KED) | 0.015 ppb             | 916 cps           | 2.1 %         |
| 114Cd (KED) | 0.013 ppb             | 407 cps           | 1.4 %         |
| 115In (KED) | 171.895 %             | 1,090,653 cps     | 1.2 %         |
| 133Cs (KED) | 0.015 ppb             | 654 cps           | 12.6 %        |
| 138Ba (KED) | 1.423 ppb             | 82,077 cps        | 2.0 %         |
| 139La (KED) | 0.076 ppb             | 8,800 cps         | 1.4 %         |
| 140Ce (KED) | 0.209 ppb             | 30,677 cps        | 1.5 %         |
| 141Pr (KED) | 0.020 ppb             | 3,061 cps         | 4.2 %         |
| 142Nd (KED) | 0.116 ppb             | 7,210 cps         | 1.9 %         |
| 152Sm (KED) | 0.013 ppb             | 696 cps           | 8.9 %         |
| 153Eu (KED) | 0.002 ppb             | 250 cps           | 4.8 %         |
| 158Gd (KED) | 0.011 ppb             | 734 cps           | 3.5 %         |
| 159Tb (KED) | 185.894 %             | 4,898,429 cps     | 0.8 %         |
| 164Dy (KED) | 0.009 ppb             | 671 cps           | 3.5 %         |
| 166Er (KED) | 0.005 ppb             | 884 cps           | 4.9 %         |
| 169Tm (KED) | 0.000 ppb             | 161 cps           | 3.2 %         |
| 174Yb (KED) | 0.003 ppb             | 369 cps           | 13.8 %        |
| 175Lu (KED) | -0.019 ppb            | 19,458 cps        | 1.3 %         |
| 205Tl (KED) | 0.002 ppb             | 477 cps           | 10.6 %        |
| 208Pb (KED) | 0.196 ppb             | 32,688 cps        | 0.9 %         |
| 209Bi (KED) | 168.866 %             | 3,768,474 cps     | 0.6 %         |
| 232Th (KED) | 0.023 ppb             | 6,344 cps         | 3.7 %         |
| 238U (KED)  | 0.007 ppb             | 2,052 cps         | 1.7 %         |

## Sample Summary

Instrument ID: iCAP Q

Analysis index: 24

Analysis name: 2053ti

Analysis started at: 10/14/2021 12:42:58 PM

User name: WINDOWS-UPCI4ER\Administrator

| Category    | Concentration average | Concentration RSD |
|-------------|-----------------------|-------------------|
| 6Li (KED)   | 177.754 %             | 4.6 %             |
| 9Be (KED)   | 0.000 ppb             |                   |
| 11B (KED)   | -2.036 ppb            | 53.8 %            |
| 24Mg (KED)  | 144.030 ppb           | 4.6 %             |
| 27Al (KED)  | 88.016 ppb            | 2.0 %             |
| 45Sc (KED)  | 176.189 %             | 0.1 %             |
| 51V (KED)   | 0.179 ppb             | 1.9 %             |
| 52Cr (KED)  | 0.391 ppb             | 0.2 %             |
| 55Mn (KED)  | 3.275 ppb             | 1.7 %             |
| 56Fe (KED)  | 116.068 ppb           | 1.3 %             |
| 58Ni (KED)  | 0.560 ppb             | 2.1 %             |
| 59Co (KED)  | 0.045 ppb             | 4.8 %             |
| 63Cu (KED)  | 2.683 ppb             | 2.1 %             |
| 64Zn (KED)  | 51.088 ppb            | 0.7 %             |
| 69Ga (KED)  | 0.453 ppb             | 6.1 %             |
| 75As (KED)  | 0.067 ppb             | 17.6 %            |
| 80Se (KED)  | -3.387 ppb            | 6.5 %             |
| 85Rb (KED)  | 0.991 ppb             | 2.4 %             |
| 88Sr (KED)  | 2.381 ppb             | 0.8 %             |
| 89Y (KED)   | 175.117 %             | 1.4 %             |
| 107Ag (KED) | 0.013 ppb             | 2.0 %             |
| 114Cd (KED) | 0.011 ppb             | 10.2 %            |
| 115In (KED) | 171.010 %             | 1.5 %             |
| 133Cs (KED) | 0.017 ppb             | 6.1 %             |
| 138Ba (KED) | 1.631 ppb             | 2.5 %             |
| 139La (KED) | 0.090 ppb             | 0.9 %             |
| 140Ce (KED) | 0.226 ppb             | 1.5 %             |
| 141Pr (KED) | 0.021 ppb             | 3.7 %             |
| 142Nd (KED) | 0.124 ppb             | 4.0 %             |
| 152Sm (KED) | 0.015 ppb             | 7.9 %             |
| 153Eu (KED) | 0.004 ppb             | 3.1 %             |
| 158Gd (KED) | 0.013 ppb             | 9.5 %             |
| 159Tb (KED) | 187.239 %             | 0.9 %             |
| 164Dy (KED) | 0.009 ppb             | 9.9 %             |
| 166Er (KED) | 0.004 ppb             | 11.4 %            |
| 169Tm (KED) | 0.000 ppb             | 20.4 %            |
| 174Yb (KED) | 0.004 ppb             | 8.6 %             |
| 175Lu (KED) | -0.018 ppb            | 19.6 %            |
| 205Tl (KED) | 0.002 ppb             | 13.1 %            |
| 208Pb (KED) | 0.172 ppb             | 2.3 %             |
| 209Bi (KED) | 168.739 %             | 0.8 %             |
| 232Th (KED) | 0.025 ppb             | 3.5 %             |
| 238U (KED)  | 0.007 ppb             | 1.5 %             |

| Category   | Concentration average | Intensity average | Intensity RSD |
|------------|-----------------------|-------------------|---------------|
| 6Li (KED)  | 177.754 %             | 3,709 cps         | 4.6 %         |
| 9Be (KED)  | 0.000 ppb             | 0 cps             |               |
| 11B (KED)  | -2.036 ppb            | 1,198 cps         | 12.9 %        |
| 24Mg (KED) | 144.030 ppb           | 123,874 cps       | 0.2 %         |
| 27Al (KED) | 88.016 ppb            | 21,684 cps        | 2.1 %         |

| Category    | Concentration average | Intensity average | Intensity RSD |
|-------------|-----------------------|-------------------|---------------|
| 45Sc (KED)  | 176.189 %             | 75,452 cps        | 0.1 %         |
| 51V (KED)   | 0.179 ppb             | 2,132 cps         | 1.8 %         |
| 52Cr (KED)  | 0.391 ppb             | 7,339 cps         | 0.1 %         |
| 55Mn (KED)  | 3.275 ppb             | 33,884 cps        | 1.7 %         |
| 56Fe (KED)  | 116.068 ppb           | 1,973,423 cps     | 1.3 %         |
| 58Ni (KED)  | 0.560 ppb             | 11,727 cps        | 2.0 %         |
| 59Co (KED)  | 0.045 ppb             | 1,540 cps         | 4.7 %         |
| 63Cu (KED)  | 2.683 ppb             | 64,874 cps        | 0.7 %         |
| 64Zn (KED)  | 51.088 ppb            | 397,862 cps       | 0.8 %         |
| 69Ga (KED)  | 0.453 ppb             | 4,449 cps         | 4.6 %         |
| 75As (KED)  | 0.067 ppb             | 167 cps           | 16.4 %        |
| 80Se (KED)  | -3.387 ppb            | 3,007 cps         | 5.6 %         |
| 85Rb (KED)  | 0.991 ppb             | 9,001 cps         | 3.0 %         |
| 88Sr (KED)  | 2.381 ppb             | 31,658 cps        | 0.7 %         |
| 89Y (KED)   | 175.117 %             | 622,307 cps       | 1.4 %         |
| 107Ag (KED) | 0.013 ppb             | 827 cps           | 3.3 %         |
| 114Cd (KED) | 0.011 ppb             | 351 cps           | 7.1 %         |
| 115In (KED) | 171.010 %             | 1,085,037 cps     | 1.5 %         |
| 133Cs (KED) | 0.017 ppb             | 743 cps           | 6.0 %         |
| 138Ba (KED) | 1.631 ppb             | 94,596 cps        | 3.0 %         |
| 139La (KED) | 0.090 ppb             | 10,490 cps        | 1.7 %         |
| 140Ce (KED) | 0.226 ppb             | 33,318 cps        | 1.2 %         |
| 141Pr (KED) | 0.021 ppb             | 3,355 cps         | 2.8 %         |
| 142Nd (KED) | 0.124 ppb             | 7,751 cps         | 3.4 %         |
| 152Sm (KED) | 0.015 ppb             | 821 cps           | 7.0 %         |
| 153Eu (KED) | 0.004 ppb             | 398 cps           | 3.9 %         |
| 158Gd (KED) | 0.013 ppb             | 903 cps           | 8.6 %         |
| 159Tb (KED) | 187.239 %             | 4,933,866 cps     | 0.9 %         |
| 164Dy (KED) | 0.009 ppb             | 674 cps           | 9.6 %         |
| 166Er (KED) | 0.004 ppb             | 799 cps           | 4.4 %         |
| 169Tm (KED) | 0.000 ppb             | 169 cps           | 17.2 %        |
| 174Yb (KED) | 0.004 ppb             | 436 cps           | 7.7 %         |
| 175Lu (KED) | -0.018 ppb            | 19,767 cps        | 2.9 %         |
| 205Tl (KED) | 0.002 ppb             | 468 cps           | 12.6 %        |
| 208Pb (KED) | 0.172 ppb             | 29,398 cps        | 2.5 %         |
| 209Bi (KED) | 168.739 %             | 3,765,631 cps     | 0.8 %         |
| 232Th (KED) | 0.025 ppb             | 6,976 cps         | 2.7 %         |
| 238U (KED)  | 0.007 ppb             | 2,289 cps         | 2.2 %         |

## Sample Summary

Instrument ID: iCAP Q

Analysis index: 25

Analysis name: 072ti

Analysis started at: 10/14/2021 12:46:29 PM

User name: WINDOWS-UPCI4ER\Administrator

| Category    | Concentration average | Concentration RSD |
|-------------|-----------------------|-------------------|
| 6Li (KED)   | 179.192 %             | 3.5 %             |
| 9Be (KED)   | 0.005 ppb             | 173.2 %           |
| 11B (KED)   | -0.810 ppb            | 36.3 %            |
| 24Mg (KED)  | 127.608 ppb           | 3.1 %             |
| 27Al (KED)  | 87.565 ppb            | 2.1 %             |
| 45Sc (KED)  | 176.802 %             | 1.5 %             |
| 51V (KED)   | 0.170 ppb             | 1.4 %             |
| 52Cr (KED)  | 0.690 ppb             | 2.2 %             |
| 55Mn (KED)  | 3.950 ppb             | 3.2 %             |
| 56Fe (KED)  | 102.933 ppb           | 1.5 %             |
| 58Ni (KED)  | 0.754 ppb             | 1.0 %             |
| 59Co (KED)  | 0.047 ppb             | 5.7 %             |
| 63Cu (KED)  | 2.880 ppb             | 1.3 %             |
| 64Zn (KED)  | 60.406 ppb            | 0.4 %             |
| 69Ga (KED)  | 0.412 ppb             | 2.3 %             |
| 75As (KED)  | 0.060 ppb             | 12.1 %            |
| 80Se (KED)  | -3.288 ppb            | 2.2 %             |
| 85Rb (KED)  | 1.662 ppb             | 1.8 %             |
| 88Sr (KED)  | 1.829 ppb             | 1.3 %             |
| 89Y (KED)   | 172.658 %             | 1.0 %             |
| 107Ag (KED) | 0.019 ppb             | 2.1 %             |
| 114Cd (KED) | 0.010 ppb             | 6.5 %             |
| 115In (KED) | 167.314 %             | 1.1 %             |
| 133Cs (KED) | 0.018 ppb             | 2.7 %             |
| 138Ba (KED) | 1.436 ppb             | 2.9 %             |
| 139La (KED) | 0.104 ppb             | 1.4 %             |
| 140Ce (KED) | 0.257 ppb             | 0.7 %             |
| 141Pr (KED) | 0.025 ppb             | 3.9 %             |
| 142Nd (KED) | 0.142 ppb             | 3.0 %             |
| 152Sm (KED) | 0.017 ppb             | 6.3 %             |
| 153Eu (KED) | 0.003 ppb             | 6.3 %             |
| 158Gd (KED) | 0.014 ppb             | 9.7 %             |
| 159Tb (KED) | 182.112 %             | 1.3 %             |
| 164Dy (KED) | 0.009 ppb             | 8.4 %             |
| 166Er (KED) | 0.004 ppb             | 10.6 %            |
| 169Tm (KED) | 0.001 ppb             | 16.6 %            |
| 174Yb (KED) | 0.004 ppb             | 16.5 %            |
| 175Lu (KED) | -0.018 ppb            | 6.3 %             |
| 205Tl (KED) | 0.003 ppb             | 12.1 %            |
| 208Pb (KED) | 0.184 ppb             | 2.6 %             |
| 209Bi (KED) | 165.858 %             | 1.3 %             |
| 232Th (KED) | 0.033 ppb             | 3.7 %             |
| 238U (KED)  | 0.007 ppb             | 5.4 %             |

| Category   | Concentration average | Intensity average | Intensity RSD |
|------------|-----------------------|-------------------|---------------|
| 6Li (KED)  | 179.192 %             | 3,739 cps         | 3.5 %         |
| 9Be (KED)  | 0.005 ppb             | 1 cps             | 173.2 %       |
| 11B (KED)  | -0.810 ppb            | 1,338 cps         | 1.5 %         |
| 24Mg (KED) | 127.608 ppb           | 110,738 cps       | 1.1 %         |
| 27Al (KED) | 87.565 ppb            | 21,648 cps        | 2.2 %         |

| Category    | Concentration average | Intensity average | Intensity RSD |
|-------------|-----------------------|-------------------|---------------|
| 45Sc (KED)  | 176.802 %             | 75,715 cps        | 1.5 %         |
| 51V (KED)   | 0.170 ppb             | 2,027 cps         | 2.9 %         |
| 52Cr (KED)  | 0.690 ppb             | 12,824 cps        | 0.7 %         |
| 55Mn (KED)  | 3.950 ppb             | 40,953 cps        | 1.7 %         |
| 56Fe (KED)  | 102.933 ppb           | 1,756,500 cps     | 1.2 %         |
| 58Ni (KED)  | 0.754 ppb             | 15,682 cps        | 1.6 %         |
| 59Co (KED)  | 0.047 ppb             | 1,631 cps         | 4.3 %         |
| 63Cu (KED)  | 2.880 ppb             | 68,643 cps        | 1.1 %         |
| 64Zn (KED)  | 60.406 ppb            | 463,592 cps       | 1.0 %         |
| 69Ga (KED)  | 0.412 ppb             | 3,992 cps         | 2.1 %         |
| 75As (KED)  | 0.060 ppb             | 149 cps           | 11.5 %        |
| 80Se (KED)  | -3.288 ppb            | 3,035 cps         | 1.4 %         |
| 85Rb (KED)  | 1.662 ppb             | 14,859 cps        | 1.6 %         |
| 88Sr (KED)  | 1.829 ppb             | 24,013 cps        | 0.7 %         |
| 89Y (KED)   | 172.658 %             | 613,569 cps       | 1.0 %         |
| 107Ag (KED) | 0.019 ppb             | 1,136 cps         | 2.4 %         |
| 114Cd (KED) | 0.010 ppb             | 318 cps           | 4.0 %         |
| 115In (KED) | 167.314 %             | 1,061,584 cps     | 1.1 %         |
| 133Cs (KED) | 0.018 ppb             | 774 cps           | 1.8 %         |
| 138Ba (KED) | 1.436 ppb             | 81,115 cps        | 1.6 %         |
| 139La (KED) | 0.104 ppb             | 11,700 cps        | 2.0 %         |
| 140Ce (KED) | 0.257 ppb             | 36,855 cps        | 1.4 %         |
| 141Pr (KED) | 0.025 ppb             | 3,816 cps         | 2.6 %         |
| 142Nd (KED) | 0.142 ppb             | 8,676 cps         | 1.7 %         |
| 152Sm (KED) | 0.017 ppb             | 896 cps           | 7.5 %         |
| 153Eu (KED) | 0.003 ppb             | 320 cps           | 7.3 %         |
| 158Gd (KED) | 0.014 ppb             | 949 cps           | 10.0 %        |
| 159Tb (KED) | 182.112 %             | 4,798,764 cps     | 1.3 %         |
| 164Dy (KED) | 0.009 ppb             | 709 cps           | 9.6 %         |
| 166Er (KED) | 0.004 ppb             | 762 cps           | 4.0 %         |
| 169Tm (KED) | 0.001 ppb             | 208 cps           | 16.2 %        |
| 174Yb (KED) | 0.004 ppb             | 389 cps           | 14.6 %        |
| 175Lu (KED) | -0.018 ppb            | 19,296 cps        | 0.8 %         |
| 205Tl (KED) | 0.003 ppb             | 504 cps           | 10.9 %        |
| 208Pb (KED) | 0.184 ppb             | 30,540 cps        | 3.0 %         |
| 209Bi (KED) | 165.858 %             | 3,701,353 cps     | 1.3 %         |
| 232Th (KED) | 0.033 ppb             | 8,947 cps         | 2.4 %         |
| 238U (KED)  | 0.007 ppb             | 2,225 cps         | 5.0 %         |

## Sample Summary

Instrument ID: iCAP Q

Analysis index: 26

Analysis name: 2862ti

Analysis started at: 10/14/2021 12:50:25 PM

User name: WINDOWS-UPCI4ER\Administrator

| Category    | Concentration average | Concentration RSD |
|-------------|-----------------------|-------------------|
| 6Li (KED)   | 179.671 %             | 3.8 %             |
| 9Be (KED)   | 0.000 ppb             |                   |
| 11B (KED)   | 19.847 ppb            | 3.9 %             |
| 24Mg (KED)  | 93.810 ppb            | 3.4 %             |
| 27Al (KED)  | 66.611 ppb            | 3.7 %             |
| 45Sc (KED)  | 178.199 %             | 0.9 %             |
| 51V (KED)   | 0.171 ppb             | 3.9 %             |
| 52Cr (KED)  | 5.784 ppb             | 1.3 %             |
| 55Mn (KED)  | 6.900 ppb             | 0.7 %             |
| 56Fe (KED)  | 111.640 ppb           | 0.9 %             |
| 58Ni (KED)  | 1.321 ppb             | 2.5 %             |
| 59Co (KED)  | 0.077 ppb             | 3.4 %             |
| 63Cu (KED)  | 1.881 ppb             | 2.8 %             |
| 64Zn (KED)  | 55.454 ppb            | 0.7 %             |
| 69Ga (KED)  | 0.362 ppb             | 4.2 %             |
| 75As (KED)  | 0.058 ppb             | 22.4 %            |
| 80Se (KED)  | -3.108 ppb            | 3.4 %             |
| 85Rb (KED)  | 0.806 ppb             | 1.5 %             |
| 88Sr (KED)  | 1.602 ppb             | 1.5 %             |
| 89Y (KED)   | 174.699 %             | 1.4 %             |
| 107Ag (KED) | 0.010 ppb             | 6.1 %             |
| 114Cd (KED) | 0.007 ppb             | 7.9 %             |
| 115In (KED) | 171.961 %             | 1.8 %             |
| 133Cs (KED) | 0.013 ppb             | 9.1 %             |
| 138Ba (KED) | 1.277 ppb             | 1.1 %             |
| 139La (KED) | 0.081 ppb             | 2.5 %             |
| 140Ce (KED) | 0.197 ppb             | 1.2 %             |
| 141Pr (KED) | 0.018 ppb             | 6.6 %             |
| 142Nd (KED) | 0.112 ppb             | 2.2 %             |
| 152Sm (KED) | 0.012 ppb             | 3.9 %             |
| 153Eu (KED) | 0.003 ppb             | 16.4 %            |
| 158Gd (KED) | 0.011 ppb             | 12.0 %            |
| 159Tb (KED) | 183.033 %             | 0.7 %             |
| 164Dy (KED) | 0.008 ppb             | 5.7 %             |
| 166Er (KED) | 0.003 ppb             | 26.9 %            |
| 169Tm (KED) | 0.001 ppb             | 30.2 %            |
| 174Yb (KED) | 0.004 ppb             | 8.4 %             |
| 175Lu (KED) | -0.020 ppb            | 11.0 %            |
| 205Tl (KED) | 0.003 ppb             | 3.4 %             |
| 208Pb (KED) | 0.118 ppb             | 1.8 %             |
| 209Bi (KED) | 169.637 %             | 2.0 %             |
| 232Th (KED) | 0.023 ppb             | 5.3 %             |
| 238U (KED)  | 0.006 ppb             | 3.3 %             |

| Category   | Concentration average | Intensity average | Intensity RSD |
|------------|-----------------------|-------------------|---------------|
| 6Li (KED)  | 179.671 %             | 3,749 cps         | 3.8 %         |
| 9Be (KED)  | 0.000 ppb             | 0 cps             |               |
| 11B (KED)  | 19.847 ppb            | 3,585 cps         | 4.7 %         |
| 24Mg (KED) | 93.810 ppb            | 81,659 cps        | 0.6 %         |
| 27Al (KED) | 66.611 ppb            | 16,629 cps        | 2.8 %         |

| Category    | Concentration average | Intensity average | Intensity RSD |
|-------------|-----------------------|-------------------|---------------|
| 45Sc (KED)  | 178.199 %             | 76,313 cps        | 0.9 %         |
| 51V (KED)   | 0.171 ppb             | 2,059 cps         | 3.2 %         |
| 52Cr (KED)  | 5.784 ppb             | 106,526 cps       | 0.6 %         |
| 55Mn (KED)  | 6.900 ppb             | 71,949 cps        | 1.1 %         |
| 56Fe (KED)  | 111.640 ppb           | 1,919,847 cps     | 0.1 %         |
| 58Ni (KED)  | 1.321 ppb             | 27,348 cps        | 1.6 %         |
| 59Co (KED)  | 0.077 ppb             | 2,657 cps         | 2.5 %         |
| 63Cu (KED)  | 1.881 ppb             | 45,559 cps        | 1.5 %         |
| 64Zn (KED)  | 55.454 ppb            | 430,709 cps       | 0.7 %         |
| 69Ga (KED)  | 0.362 ppb             | 3,561 cps         | 2.8 %         |
| 75As (KED)  | 0.058 ppb             | 146 cps           | 19.7 %        |
| 80Se (KED)  | -3.108 ppb            | 3,200 cps         | 1.1 %         |
| 85Rb (KED)  | 0.806 ppb             | 7,313 cps         | 0.3 %         |
| 88Sr (KED)  | 1.602 ppb             | 21,294 cps        | 0.6 %         |
| 89Y (KED)   | 174.699 %             | 620,821 cps       | 1.4 %         |
| 107Ag (KED) | 0.010 ppb             | 641 cps           | 5.1 %         |
| 114Cd (KED) | 0.007 ppb             | 261 cps           | 7.3 %         |
| 115In (KED) | 171.961 %             | 1,091,067 cps     | 1.8 %         |
| 133Cs (KED) | 0.013 ppb             | 566 cps           | 9.3 %         |
| 138Ba (KED) | 1.277 ppb             | 72,669 cps        | 0.9 %         |
| 139La (KED) | 0.081 ppb             | 9,208 cps         | 2.8 %         |
| 140Ce (KED) | 0.197 ppb             | 28,366 cps        | 0.6 %         |
| 141Pr (KED) | 0.018 ppb             | 2,831 cps         | 7.2 %         |
| 142Nd (KED) | 0.112 ppb             | 6,845 cps         | 2.6 %         |
| 152Sm (KED) | 0.012 ppb             | 651 cps           | 4.4 %         |
| 153Eu (KED) | 0.003 ppb             | 286 cps           | 15.9 %        |
| 158Gd (KED) | 0.011 ppb             | 727 cps           | 11.7 %        |
| 159Tb (KED) | 183.033 %             | 4,823,036 cps     | 0.7 %         |
| 164Dy (KED) | 0.008 ppb             | 600 cps           | 5.8 %         |
| 166Er (KED) | 0.003 ppb             | 676 cps           | 9.8 %         |
| 169Tm (KED) | 0.001 ppb             | 187 cps           | 26.7 %        |
| 174Yb (KED) | 0.004 ppb             | 399 cps           | 7.9 %         |
| 175Lu (KED) | -0.020 ppb            | 18,991 cps        | 2.7 %         |
| 205Tl (KED) | 0.003 ppb             | 529 cps           | 1.3 %         |
| 208Pb (KED) | 0.118 ppb             | 22,346 cps        | 2.3 %         |
| 209Bi (KED) | 169.637 %             | 3,785,674 cps     | 2.0 %         |
| 232Th (KED) | 0.023 ppb             | 6,417 cps         | 3.3 %         |
| 238U (KED)  | 0.006 ppb             | 1,796 cps         | 3.8 %         |

## Sample Summary

Instrument ID: iCAP Q

Analysis index: 27

Analysis name: 064ti

Analysis started at: 10/14/2021 12:54:15 PM

User name: WINDOWS-UPCI4ER\Administrator

| Category    | Concentration average | Concentration RSD |
|-------------|-----------------------|-------------------|
| 6Li (KED)   | 185.210 %             | 3.3 %             |
| 9Be (KED)   | 0.005 ppb             | 173.2 %           |
| 11B (KED)   | 0.878 ppb             | 63.3 %            |
| 24Mg (KED)  | 112.656 ppb           | 3.6 %             |
| 27Al (KED)  | 67.781 ppb            | 1.2 %             |
| 45Sc (KED)  | 180.535 %             | 0.2 %             |
| 51V (KED)   | 0.143 ppb             | 2.2 %             |
| 52Cr (KED)  | 2.137 ppb             | 1.4 %             |
| 55Mn (KED)  | 4.034 ppb             | 0.3 %             |
| 56Fe (KED)  | 91.562 ppb            | 1.6 %             |
| 58Ni (KED)  | 0.573 ppb             | 2.1 %             |
| 59Co (KED)  | 0.057 ppb             | 5.8 %             |
| 63Cu (KED)  | 2.901 ppb             | 0.7 %             |
| 64Zn (KED)  | 56.026 ppb            | 0.3 %             |
| 69Ga (KED)  | 0.357 ppb             | 7.2 %             |
| 75As (KED)  | 0.056 ppb             | 33.6 %            |
| 80Se (KED)  | -3.187 ppb            | 1.9 %             |
| 85Rb (KED)  | 1.411 ppb             | 2.2 %             |
| 88Sr (KED)  | 1.623 ppb             | 1.7 %             |
| 89Y (KED)   | 172.267 %             | 0.5 %             |
| 107Ag (KED) | 0.013 ppb             | 6.2 %             |
| 114Cd (KED) | 0.009 ppb             | 24.1 %            |
| 115In (KED) | 172.498 %             | 1.3 %             |
| 133Cs (KED) | 0.014 ppb             | 1.6 %             |
| 138Ba (KED) | 1.208 ppb             | 1.8 %             |
| 139La (KED) | 0.079 ppb             | 0.4 %             |
| 140Ce (KED) | 0.213 ppb             | 1.6 %             |
| 141Pr (KED) | 0.019 ppb             | 6.8 %             |
| 142Nd (KED) | 0.115 ppb             | 2.1 %             |
| 152Sm (KED) | 0.013 ppb             | 4.5 %             |
| 153Eu (KED) | 0.002 ppb             | 8.3 %             |
| 158Gd (KED) | 0.011 ppb             | 2.0 %             |
| 159Tb (KED) | 185.185 %             | 2.0 %             |
| 164Dy (KED) | 0.007 ppb             | 9.3 %             |
| 166Er (KED) | 0.004 ppb             | 16.2 %            |
| 169Tm (KED) | 0.000 ppb             | 17.6 %            |
| 174Yb (KED) | 0.003 ppb             | 11.0 %            |
| 175Lu (KED) | -0.019 ppb            | 12.7 %            |
| 205Tl (KED) | 0.003 ppb             | 7.9 %             |
| 208Pb (KED) | 0.164 ppb             | 3.3 %             |
| 209Bi (KED) | 165.560 %             | 1.3 %             |
| 232Th (KED) | 0.023 ppb             | 1.8 %             |
| 238U (KED)  | 0.005 ppb             | 2.7 %             |

| Category   | Concentration average | Intensity average | Intensity RSD |
|------------|-----------------------|-------------------|---------------|
| 6Li (KED)  | 185.210 %             | 3,865 cps         | 3.3 %         |
| 9Be (KED)  | 0.005 ppb             | 1 cps             | 173.2 %       |
| 11B (KED)  | 0.878 ppb             | 1,572 cps         | 5.1 %         |
| 24Mg (KED) | 112.656 ppb           | 101,059 cps       | 0.8 %         |
| 27Al (KED) | 67.781 ppb            | 17,144 cps        | 1.3 %         |

| Category    | Concentration average | Intensity average | Intensity RSD |
|-------------|-----------------------|-------------------|---------------|
| 45Sc (KED)  | 180.535 %             | 77,313 cps        | 0.2 %         |
| 51V (KED)   | 0.143 ppb             | 1,745 cps         | 2.0 %         |
| 52Cr (KED)  | 2.137 ppb             | 40,023 cps        | 1.6 %         |
| 55Mn (KED)  | 4.034 ppb             | 42,714 cps        | 0.2 %         |
| 56Fe (KED)  | 91.562 ppb            | 1,596,097 cps     | 1.8 %         |
| 58Ni (KED)  | 0.573 ppb             | 12,277 cps        | 2.2 %         |
| 59Co (KED)  | 0.057 ppb             | 2,007 cps         | 5.4 %         |
| 63Cu (KED)  | 2.901 ppb             | 68,981 cps        | 0.3 %         |
| 64Zn (KED)  | 56.026 ppb            | 429,106 cps       | 0.3 %         |
| 69Ga (KED)  | 0.357 ppb             | 3,457 cps         | 6.6 %         |
| 75As (KED)  | 0.056 ppb             | 139 cps           | 29.3 %        |
| 80Se (KED)  | -3.187 ppb            | 3,100 cps         | 1.2 %         |
| 85Rb (KED)  | 1.411 ppb             | 12,586 cps        | 2.2 %         |
| 88Sr (KED)  | 1.623 ppb             | 21,274 cps        | 1.1 %         |
| 89Y (KED)   | 172.267 %             | 612,180 cps       | 0.5 %         |
| 107Ag (KED) | 0.013 ppb             | 847 cps           | 5.8 %         |
| 114Cd (KED) | 0.009 ppb             | 317 cps           | 16.9 %        |
| 115In (KED) | 172.498 %             | 1,094,474 cps     | 1.3 %         |
| 133Cs (KED) | 0.014 ppb             | 618 cps           | 0.6 %         |
| 138Ba (KED) | 1.208 ppb             | 69,625 cps        | 1.1 %         |
| 139La (KED) | 0.079 ppb             | 9,047 cps         | 1.7 %         |
| 140Ce (KED) | 0.213 ppb             | 31,053 cps        | 0.7 %         |
| 141Pr (KED) | 0.019 ppb             | 2,937 cps         | 6.2 %         |
| 142Nd (KED) | 0.115 ppb             | 7,110 cps         | 0.5 %         |
| 152Sm (KED) | 0.013 ppb             | 693 cps           | 2.5 %         |
| 153Eu (KED) | 0.002 ppb             | 258 cps           | 6.4 %         |
| 158Gd (KED) | 0.011 ppb             | 724 cps           | 1.9 %         |
| 159Tb (KED) | 185.185 %             | 4,879,758 cps     | 2.0 %         |
| 164Dy (KED) | 0.007 ppb             | 553 cps           | 7.9 %         |
| 166Er (KED) | 0.004 ppb             | 762 cps           | 5.6 %         |
| 169Tm (KED) | 0.000 ppb             | 163 cps           | 13.4 %        |
| 174Yb (KED) | 0.003 ppb             | 327 cps           | 10.0 %        |
| 175Lu (KED) | -0.019 ppb            | 19,380 cps        | 1.8 %         |
| 205Tl (KED) | 0.003 ppb             | 516 cps           | 8.8 %         |
| 208Pb (KED) | 0.164 ppb             | 27,758 cps        | 2.0 %         |
| 209Bi (KED) | 165.560 %             | 3,694,694 cps     | 1.3 %         |
| 232Th (KED) | 0.023 ppb             | 6,113 cps         | 3.0 %         |
| 238U (KED)  | 0.005 ppb             | 1,675 cps         | 2.7 %         |

## Sample Summary

Instrument ID: iCAP Q

Analysis index: 28

Analysis name: 2061ti

Analysis started at: 10/14/2021 12:58:37 PM

User name: WINDOWS-UPCI4ER\Administrator

| Category    | Concentration average | Concentration RSD |
|-------------|-----------------------|-------------------|
| 6Li (KED)   | 180.364 %             | 1.2 %             |
| 9Be (KED)   | 0.005 ppb             | 173.2 %           |
| 11B (KED)   | 19.660 ppb            | 1.0 %             |
| 24Mg (KED)  | 156.413 ppb           | 1.5 %             |
| 27Al (KED)  | 118.669 ppb           | 3.0 %             |
| 45Sc (KED)  | 178.108 %             | 1.4 %             |
| 51V (KED)   | 0.258 ppb             | 2.2 %             |
| 52Cr (KED)  | 2.714 ppb             | 2.8 %             |
| 55Mn (KED)  | 6.067 ppb             | 0.2 %             |
| 56Fe (KED)  | 162.500 ppb           | 1.8 %             |
| 58Ni (KED)  | 1.174 ppb             | 2.9 %             |
| 59Co (KED)  | 0.080 ppb             | 2.5 %             |
| 63Cu (KED)  | 2.917 ppb             | 1.6 %             |
| 64Zn (KED)  | 47.386 ppb            | 0.7 %             |
| 69Ga (KED)  | 0.596 ppb             | 0.9 %             |
| 75As (KED)  | 0.081 ppb             | 13.5 %            |
| 80Se (KED)  | -3.159 ppb            | 1.7 %             |
| 85Rb (KED)  | 0.915 ppb             | 1.2 %             |
| 88Sr (KED)  | 2.929 ppb             | 1.0 %             |
| 89Y (KED)   | 176.452 %             | 0.7 %             |
| 107Ag (KED) | 0.011 ppb             | 6.9 %             |
| 114Cd (KED) | 0.008 ppb             | 19.7 %            |
| 115In (KED) | 169.141 %             | 1.5 %             |
| 133Cs (KED) | 0.022 ppb             | 4.3 %             |
| 138Ba (KED) | 2.141 ppb             | 0.9 %             |
| 139La (KED) | 0.141 ppb             | 0.8 %             |
| 140Ce (KED) | 0.406 ppb             | 1.3 %             |
| 141Pr (KED) | 0.036 ppb             | 3.8 %             |
| 142Nd (KED) | 0.227 ppb             | 2.8 %             |
| 152Sm (KED) | 0.026 ppb             | 5.1 %             |
| 153Eu (KED) | 0.005 ppb             | 6.4 %             |
| 158Gd (KED) | 0.021 ppb             | 4.2 %             |
| 159Tb (KED) | 184.395 %             | 1.3 %             |
| 164Dy (KED) | 0.015 ppb             | 3.5 %             |
| 166Er (KED) | 0.008 ppb             | 15.7 %            |
| 169Tm (KED) | 0.001 ppb             | 10.9 %            |
| 174Yb (KED) | 0.005 ppb             | 10.4 %            |
| 175Lu (KED) | -0.019 ppb            | 28.4 %            |
| 205Tl (KED) | 0.004 ppb             | 7.6 %             |
| 208Pb (KED) | 0.211 ppb             | 2.2 %             |
| 209Bi (KED) | 166.590 %             | 0.4 %             |
| 232Th (KED) | 0.045 ppb             | 1.7 %             |
| 238U (KED)  | 0.010 ppb             | 2.7 %             |

| Category   | Concentration average | Intensity average | Intensity RSD |
|------------|-----------------------|-------------------|---------------|
| 6Li (KED)  | 180.364 %             | 3,764 cps         | 1.2 %         |
| 9Be (KED)  | 0.005 ppb             | 1 cps             | 173.2 %       |
| 11B (KED)  | 19.660 ppb            | 3,578 cps         | 1.6 %         |
| 24Mg (KED) | 156.413 ppb           | 136,657 cps       | 0.4 %         |
| 27Al (KED) | 118.669 ppb           | 29,497 cps        | 1.6 %         |

| Category    | Concentration average | Intensity average | Intensity RSD |
|-------------|-----------------------|-------------------|---------------|
| 45Sc (KED)  | 178.108 %             | 76,274 cps        | 1.4 %         |
| 51V (KED)   | 0.258 ppb             | 3,109 cps         | 1.5 %         |
| 52Cr (KED)  | 2.714 ppb             | 50,069 cps        | 1.4 %         |
| 55Mn (KED)  | 6.067 ppb             | 63,258 cps        | 1.2 %         |
| 56Fe (KED)  | 162.500 ppb           | 2,790,804 cps     | 0.5 %         |
| 58Ni (KED)  | 1.174 ppb             | 24,344 cps        | 1.5 %         |
| 59Co (KED)  | 0.080 ppb             | 2,746 cps         | 3.2 %         |
| 63Cu (KED)  | 2.917 ppb             | 71,033 cps        | 2.1 %         |
| 64Zn (KED)  | 47.386 ppb            | 371,960 cps       | 0.5 %         |
| 69Ga (KED)  | 0.596 ppb             | 5,876 cps         | 0.6 %         |
| 75As (KED)  | 0.081 ppb             | 198 cps           | 12.8 %        |
| 80Se (KED)  | -3.159 ppb            | 3,196 cps         | 1.1 %         |
| 85Rb (KED)  | 0.915 ppb             | 8,379 cps         | 0.6 %         |
| 88Sr (KED)  | 2.929 ppb             | 39,214 cps        | 0.6 %         |
| 89Y (KED)   | 176.452 %             | 627,053 cps       | 0.7 %         |
| 107Ag (KED) | 0.011 ppb             | 674 cps           | 6.2 %         |
| 114Cd (KED) | 0.008 ppb             | 281 cps           | 14.0 %        |
| 115In (KED) | 169.141 %             | 1,073,173 cps     | 1.5 %         |
| 133Cs (KED) | 0.022 ppb             | 958 cps           | 3.0 %         |
| 138Ba (KED) | 2.141 ppb             | 121,897 cps       | 0.8 %         |
| 139La (KED) | 0.141 ppb             | 16,126 cps        | 0.5 %         |
| 140Ce (KED) | 0.406 ppb             | 58,827 cps        | 0.5 %         |
| 141Pr (KED) | 0.036 ppb             | 5,605 cps         | 3.3 %         |
| 142Nd (KED) | 0.227 ppb             | 13,991 cps        | 2.4 %         |
| 152Sm (KED) | 0.026 ppb             | 1,390 cps         | 5.2 %         |
| 153Eu (KED) | 0.005 ppb             | 524 cps           | 7.7 %         |
| 158Gd (KED) | 0.021 ppb             | 1,392 cps         | 3.4 %         |
| 159Tb (KED) | 184.395 %             | 4,858,921 cps     | 1.3 %         |
| 164Dy (KED) | 0.015 ppb             | 1,187 cps         | 2.6 %         |
| 166Er (KED) | 0.008 ppb             | 1,102 cps         | 9.3 %         |
| 169Tm (KED) | 0.001 ppb             | 330 cps           | 9.9 %         |
| 174Yb (KED) | 0.005 ppb             | 573 cps           | 11.5 %        |
| 175Lu (KED) | -0.019 ppb            | 19,293 cps        | 4.5 %         |
| 205Tl (KED) | 0.004 ppb             | 729 cps           | 7.8 %         |
| 208Pb (KED) | 0.211 ppb             | 34,203 cps        | 1.5 %         |
| 209Bi (KED) | 166.590 %             | 3,717,689 cps     | 0.4 %         |
| 232Th (KED) | 0.045 ppb             | 12,215 cps        | 1.3 %         |
| 238U (KED)  | 0.010 ppb             | 3,071 cps         | 3.1 %         |

## Sample Summary

Instrument ID: iCAP Q

Analysis index: 29

Analysis name: 3090ti

Analysis started at: 10/14/2021 1:02:08 PM

User name: WINDOWS-UPCI4ER\Administrator

| Category    | Concentration average | Concentration RSD |
|-------------|-----------------------|-------------------|
| 6Li (KED)   | 183.559 %             | 2.5 %             |
| 9Be (KED)   | 0.015 ppb             | 98.4 %            |
| 11B (KED)   | -3.564 ppb            | 25.9 %            |
| 24Mg (KED)  | 123.675 ppb           | 1.4 %             |
| 27Al (KED)  | 80.911 ppb            | 2.3 %             |
| 45Sc (KED)  | 180.548 %             | 2.0 %             |
| 51V (KED)   | 0.172 ppb             | 4.9 %             |
| 52Cr (KED)  | 0.779 ppb             | 1.5 %             |
| 55Mn (KED)  | 3.140 ppb             | 1.1 %             |
| 56Fe (KED)  | 97.905 ppb            | 0.5 %             |
| 58Ni (KED)  | 0.570 ppb             | 3.8 %             |
| 59Co (KED)  | 0.050 ppb             | 3.3 %             |
| 63Cu (KED)  | 3.339 ppb             | 2.7 %             |
| 64Zn (KED)  | 54.508 ppb            | 1.0 %             |
| 69Ga (KED)  | 0.433 ppb             | 4.1 %             |
| 75As (KED)  | 0.055 ppb             | 15.2 %            |
| 80Se (KED)  | -3.209 ppb            | 6.2 %             |
| 85Rb (KED)  | 0.691 ppb             | 3.8 %             |
| 88Sr (KED)  | 2.233 ppb             | 1.2 %             |
| 89Y (KED)   | 174.328 %             | 0.7 %             |
| 107Ag (KED) | 0.012 ppb             | 3.4 %             |
| 114Cd (KED) | 0.008 ppb             | 5.4 %             |
| 115In (KED) | 171.302 %             | 1.7 %             |
| 133Cs (KED) | 0.015 ppb             | 8.9 %             |
| 138Ba (KED) | 1.527 ppb             | 3.3 %             |
| 139La (KED) | 0.091 ppb             | 1.6 %             |
| 140Ce (KED) | 0.229 ppb             | 7.2 %             |
| 141Pr (KED) | 0.023 ppb             | 5.8 %             |
| 142Nd (KED) | 0.128 ppb             | 2.8 %             |
| 152Sm (KED) | 0.016 ppb             | 6.3 %             |
| 153Eu (KED) | 0.003 ppb             | 7.6 %             |
| 158Gd (KED) | 0.013 ppb             | 2.5 %             |
| 159Tb (KED) | 183.360 %             | 1.0 %             |
| 164Dy (KED) | 0.009 ppb             | 12.8 %            |
| 166Er (KED) | 0.004 ppb             | 16.9 %            |
| 169Tm (KED) | 0.001 ppb             | 10.9 %            |
| 174Yb (KED) | 0.004 ppb             | 7.6 %             |
| 175Lu (KED) | -0.019 ppb            | 9.7 %             |
| 205Tl (KED) | 0.003 ppb             | 6.9 %             |
| 208Pb (KED) | 0.276 ppb             | 4.2 %             |
| 209Bi (KED) | 167.622 %             | 1.4 %             |
| 232Th (KED) | 0.030 ppb             | 3.7 %             |
| 238U (KED)  | 0.008 ppb             | 1.5 %             |

| Category   | Concentration average | Intensity average | Intensity RSD |
|------------|-----------------------|-------------------|---------------|
| 6Li (KED)  | 183.559 %             | 3,831 cps         | 2.5 %         |
| 9Be (KED)  | 0.015 ppb             | 3 cps             | 100.0 %       |
| 11B (KED)  | -3.564 ppb            | 1,064 cps         | 8.2 %         |
| 24Mg (KED) | 123.675 ppb           | 109,998 cps       | 1.4 %         |
| 27Al (KED) | 80.911 ppb            | 20,433 cps        | 1.3 %         |

| Category    | Concentration average | Intensity average | Intensity RSD |
|-------------|-----------------------|-------------------|---------------|
| 45Sc (KED)  | 180.548 %             | 77,319 cps        | 2.0 %         |
| 51V (KED)   | 0.172 ppb             | 2,101 cps         | 5.6 %         |
| 52Cr (KED)  | 0.779 ppb             | 14,744 cps        | 3.4 %         |
| 55Mn (KED)  | 3.140 ppb             | 33,303 cps        | 1.0 %         |
| 56Fe (KED)  | 97.905 ppb            | 1,706,404 cps     | 1.8 %         |
| 58Ni (KED)  | 0.570 ppb             | 12,205 cps        | 3.1 %         |
| 59Co (KED)  | 0.050 ppb             | 1,775 cps         | 5.2 %         |
| 63Cu (KED)  | 3.339 ppb             | 80,229 cps        | 2.2 %         |
| 64Zn (KED)  | 54.508 ppb            | 422,500 cps       | 0.9 %         |
| 69Ga (KED)  | 0.433 ppb             | 4,237 cps         | 4.7 %         |
| 75As (KED)  | 0.055 ppb             | 140 cps           | 13.3 %        |
| 80Se (KED)  | -3.209 ppb            | 3,122 cps         | 4.8 %         |
| 85Rb (KED)  | 0.691 ppb             | 6,259 cps         | 3.5 %         |
| 88Sr (KED)  | 2.233 ppb             | 29,564 cps        | 0.5 %         |
| 89Y (KED)   | 174.328 %             | 619,503 cps       | 0.7 %         |
| 107Ag (KED) | 0.012 ppb             | 742 cps           | 4.2 %         |
| 114Cd (KED) | 0.008 ppb             | 287 cps           | 2.3 %         |
| 115In (KED) | 171.302 %             | 1,086,885 cps     | 1.7 %         |
| 133Cs (KED) | 0.015 ppb             | 668 cps           | 7.6 %         |
| 138Ba (KED) | 1.527 ppb             | 86,774 cps        | 2.4 %         |
| 139La (KED) | 0.091 ppb             | 10,280 cps        | 2.0 %         |
| 140Ce (KED) | 0.229 ppb             | 33,051 cps        | 6.1 %         |
| 141Pr (KED) | 0.023 ppb             | 3,558 cps         | 6.5 %         |
| 142Nd (KED) | 0.128 ppb             | 7,884 cps         | 3.2 %         |
| 152Sm (KED) | 0.016 ppb             | 842 cps           | 6.7 %         |
| 153Eu (KED) | 0.003 ppb             | 323 cps           | 6.8 %         |
| 158Gd (KED) | 0.013 ppb             | 894 cps           | 3.4 %         |
| 159Tb (KED) | 183.360 %             | 4,831,662 cps     | 1.0 %         |
| 164Dy (KED) | 0.009 ppb             | 726 cps           | 12.6 %        |
| 166Er (KED) | 0.004 ppb             | 734 cps           | 7.1 %         |
| 169Tm (KED) | 0.001 ppb             | 196 cps           | 9.4 %         |
| 174Yb (KED) | 0.004 ppb             | 384 cps           | 7.0 %         |
| 175Lu (KED) | -0.019 ppb            | 19,353 cps        | 2.8 %         |
| 205Tl (KED) | 0.003 ppb             | 533 cps           | 7.7 %         |
| 208Pb (KED) | 0.276 ppb             | 43,130 cps        | 2.9 %         |
| 209Bi (KED) | 167.622 %             | 3,740,708 cps     | 1.4 %         |
| 232Th (KED) | 0.030 ppb             | 8,274 cps         | 2.4 %         |
| 238U (KED)  | 0.008 ppb             | 2,392 cps         | 2.2 %         |

## Sample Summary

Instrument ID: iCAP Q

Analysis index: 30

Analysis name: 2054ti

Analysis started at: 10/14/2021 1:05:57 PM

User name: WINDOWS-UPCI4ER\Administrator

| Category    | Concentration average | Concentration RSD |
|-------------|-----------------------|-------------------|
| 6Li (KED)   | 118.745 %             | 0.5 %             |
| 9Be (KED)   | 0.015 ppb             | 86.6 %            |
| 11B (KED)   | 22.077 ppb            | 3.4 %             |
| 24Mg (KED)  | 135.191 ppb           | 0.7 %             |
| 27Al (KED)  | 86.447 ppb            | 2.9 %             |
| 45Sc (KED)  | 117.529 %             | 0.7 %             |
| 51V (KED)   | 0.186 ppb             | 1.7 %             |
| 52Cr (KED)  | 1.643 ppb             | 2.7 %             |
| 55Mn (KED)  | 3.791 ppb             | 0.2 %             |
| 56Fe (KED)  | 110.381 ppb           | 1.0 %             |
| 58Ni (KED)  | 0.672 ppb             | 3.2 %             |
| 59Co (KED)  | 0.064 ppb             | 1.4 %             |
| 63Cu (KED)  | 3.728 ppb             | 0.2 %             |
| 64Zn (KED)  | 83.769 ppb            | 1.7 %             |
| 69Ga (KED)  | 0.436 ppb             | 5.5 %             |
| 75As (KED)  | 0.075 ppb             | 25.2 %            |
| 80Se (KED)  | -0.800 ppb            | 9.6 %             |
| 85Rb (KED)  | 1.354 ppb             | 1.2 %             |
| 88Sr (KED)  | 2.138 ppb             | 1.7 %             |
| 89Y (KED)   | 114.565 %             | 1.2 %             |
| 107Ag (KED) | 0.045 ppb             | 3.5 %             |
| 114Cd (KED) | 0.018 ppb             | 17.3 %            |
| 115In (KED) | 112.386 %             | 1.8 %             |
| 133Cs (KED) | 0.017 ppb             | 0.7 %             |
| 138Ba (KED) | 1.646 ppb             | 1.6 %             |
| 139La (KED) | 0.089 ppb             | 1.8 %             |
| 140Ce (KED) | 0.253 ppb             | 2.2 %             |
| 141Pr (KED) | 0.021 ppb             | 3.6 %             |
| 142Nd (KED) | 0.139 ppb             | 2.7 %             |
| 152Sm (KED) | 0.015 ppb             | 9.9 %             |
| 153Eu (KED) | 0.003 ppb             | 9.1 %             |
| 158Gd (KED) | 0.011 ppb             | 15.3 %            |
| 159Tb (KED) | 116.108 %             | 1.6 %             |
| 164Dy (KED) | 0.008 ppb             | 6.3 %             |
| 166Er (KED) | 0.006 ppb             | 17.7 %            |
| 169Tm (KED) | 0.001 ppb             | 7.3 %             |
| 174Yb (KED) | 0.004 ppb             | 23.0 %            |
| 175Lu (KED) | -0.015 ppb            | 31.3 %            |
| 205Tl (KED) | 0.004 ppb             | 6.5 %             |
| 208Pb (KED) | 0.243 ppb             | 2.2 %             |
| 209Bi (KED) | 111.378 %             | 2.3 %             |
| 232Th (KED) | 0.025 ppb             | 3.2 %             |
| 238U (KED)  | 0.007 ppb             | 1.7 %             |

| Category   | Concentration average | Intensity average | Intensity RSD |
|------------|-----------------------|-------------------|---------------|
| 6Li (KED)  | 118.745 %             | 2,478 cps         | 0.5 %         |
| 9Be (KED)  | 0.015 ppb             | 2 cps             | 86.6 %        |
| 11B (KED)  | 22.077 ppb            | 2,529 cps         | 1.9 %         |
| 24Mg (KED) | 135.191 ppb           | 77,790 cps        | 1.1 %         |
| 27Al (KED) | 86.447 ppb            | 14,210 cps        | 3.5 %         |

| Category    | Concentration average | Intensity average | Intensity RSD |
|-------------|-----------------------|-------------------|---------------|
| 45Sc (KED)  | 117.529 %             | 50,331 cps        | 0.7 %         |
| 51V (KED)   | 0.186 ppb             | 1,479 cps         | 1.3 %         |
| 52Cr (KED)  | 1.643 ppb             | 20,067 cps        | 2.2 %         |
| 55Mn (KED)  | 3.791 ppb             | 26,144 cps        | 0.5 %         |
| 56Fe (KED)  | 110.381 ppb           | 1,251,992 cps     | 0.8 %         |
| 58Ni (KED)  | 0.672 ppb             | 9,327 cps         | 3.0 %         |
| 59Co (KED)  | 0.064 ppb             | 1,456 cps         | 1.9 %         |
| 63Cu (KED)  | 3.728 ppb             | 58,828 cps        | 1.2 %         |
| 64Zn (KED)  | 83.769 ppb            | 426,177 cps       | 0.6 %         |
| 69Ga (KED)  | 0.436 ppb             | 2,801 cps         | 4.4 %         |
| 75As (KED)  | 0.075 ppb             | 120 cps           | 22.7 %        |
| 80Se (KED)  | -0.800 ppb            | 3,192 cps         | 1.9 %         |
| 85Rb (KED)  | 1.354 ppb             | 8,037 cps         | 0.4 %         |
| 88Sr (KED)  | 2.138 ppb             | 18,615 cps        | 2.9 %         |
| 89Y (KED)   | 114.565 %             | 407,126 cps       | 1.2 %         |
| 107Ag (KED) | 0.045 ppb             | 1,782 cps         | 5.2 %         |
| 114Cd (KED) | 0.018 ppb             | 356 cps           | 13.7 %        |
| 115In (KED) | 112.386 %             | 713,073 cps       | 1.8 %         |
| 133Cs (KED) | 0.017 ppb             | 497 cps           | 2.4 %         |
| 138Ba (KED) | 1.646 ppb             | 59,168 cps        | 0.8 %         |
| 139La (KED) | 0.089 ppb             | 6,382 cps         | 3.3 %         |
| 140Ce (KED) | 0.253 ppb             | 23,157 cps        | 3.1 %         |
| 141Pr (KED) | 0.021 ppb             | 2,026 cps         | 2.4 %         |
| 142Nd (KED) | 0.139 ppb             | 5,400 cps         | 1.2 %         |
| 152Sm (KED) | 0.015 ppb             | 504 cps           | 11.0 %        |
| 153Eu (KED) | 0.003 ppb             | 207 cps           | 7.4 %         |
| 158Gd (KED) | 0.011 ppb             | 483 cps           | 13.7 %        |
| 159Tb (KED) | 116.108 %             | 3,059,512 cps     | 1.6 %         |
| 164Dy (KED) | 0.008 ppb             | 396 cps           | 7.6 %         |
| 166Er (KED) | 0.006 ppb             | 584 cps           | 11.2 %        |
| 169Tm (KED) | 0.001 ppb             | 126 cps           | 8.1 %         |
| 174Yb (KED) | 0.004 ppb             | 260 cps           | 21.0 %        |
| 175Lu (KED) | -0.015 ppb            | 12,733 cps        | 5.3 %         |
| 205Tl (KED) | 0.004 ppb             | 468 cps           | 8.6 %         |
| 208Pb (KED) | 0.243 ppb             | 25,685 cps        | 0.6 %         |
| 209Bi (KED) | 111.378 %             | 2,485,555 cps     | 2.3 %         |
| 232Th (KED) | 0.025 ppb             | 4,572 cps         | 1.0 %         |
| 238U (KED)  | 0.007 ppb             | 1,481 cps         | 0.6 %         |
