# Supplementary material for: Geographic and breed-specific traceability of cashmere via mineral element profiling in Inner Mongolia (Ordos, Chifeng, and Alxa League)
Source: Royal Society of Chemistry journal article supplement (doi:10.1039/d5ra08122j), 2026-01-01
Supplement: d5ra08122j1.zip [file 20211018-min gai (1-24).pdf › ԭʼ޿/20211018-min gai (1-24).pdf]

## Instrument Summary:

Instrument ID: iCAP Q  
Serial Number: Undefined

## Labbook Summary:

Path and filename: \_Application Data\Workspace\LabBooks\wlw\20211018-1.imexp  
Labbook created by: Administrator  
Based on template:  
Hardware configuration: iCAPQ1  
Labbook type: eQuant  
Qtegra version (last saved): 2.7.2425.154  
Labbook started: 10/18/2021 2:59:03 PM  
Labbook finished: 10/18/2021 4:58:48 PM

## Method Summary:

| Isotope     | Mode | Dwell time (s) | # of Channels | Spacing | Resolution | IS          |
|-------------|------|----------------|---------------|---------|------------|-------------|
| 6Li (KED)   | KED  | 0.03           | 3             | 0.1     | Normal     |             |
| 9Be (KED)   | KED  | 0.03           | 3             | 0.1     | Normal     | 6Li (KED)   |
| 11B (KED)   | KED  | 0.03           | 3             | 0.1     | Normal     | 6Li (KED)   |
| 24Mg (KED)  | KED  | 0.03           | 3             | 0.1     | Normal     | 6Li (KED)   |
| 27Al (KED)  | KED  | 0.03           | 3             | 0.1     | Normal     | 45Sc (KED)  |
| 45Sc (KED)  | KED  | 0.03           | 3             | 0.1     | Normal     |             |
| 51V (KED)   | KED  | 0.03           | 3             | 0.1     | Normal     | 45Sc (KED)  |
| 52Cr (KED)  | KED  | 0.03           | 3             | 0.1     | Normal     | 45Sc (KED)  |
| 55Mn (KED)  | KED  | 0.03           | 3             | 0.1     | Normal     | 45Sc (KED)  |
| 56Fe (KED)  | KED  | 0.03           | 3             | 0.1     | Normal     | 45Sc (KED)  |
| 58Ni (KED)  | KED  | 0.03           | 3             | 0.1     | Normal     | 45Sc (KED)  |
| 59Co (KED)  | KED  | 0.03           | 3             | 0.1     | Normal     | 45Sc (KED)  |
| 63Cu (KED)  | KED  | 0.03           | 3             | 0.1     | Normal     | 89Y (KED)   |
| 64Zn (KED)  | KED  | 0.03           | 3             | 0.1     | Normal     | 89Y (KED)   |
| 69Ga (KED)  | KED  | 0.03           | 3             | 0.1     | Normal     | 89Y (KED)   |
| 75As (KED)  | KED  | 0.03           | 3             | 0.1     | Normal     | 89Y (KED)   |
| 80Se (KED)  | KED  | 0.03           | 3             | 0.1     | Normal     | 89Y (KED)   |
| 85Rb (KED)  | KED  | 0.03           | 3             | 0.1     | Normal     | 89Y (KED)   |
| 88Sr (KED)  | KED  | 0.03           | 3             | 0.1     | Normal     | 89Y (KED)   |
| 89Y (KED)   | KED  | 0.03           | 3             | 0.1     | Normal     |             |
| 107Ag (KED) | KED  | 0.03           | 3             | 0.1     | Normal     | 115In (KED) |
| 114Cd (KED) | KED  | 0.03           | 3             | 0.1     | Normal     | 115In (KED) |
| 115In (KED) | KED  | 0.03           | 3             | 0.1     | Normal     |             |
| 133Cs (KED) | KED  | 0.03           | 3             | 0.1     | Normal     | 115In (KED) |
| 138Ba (KED) | KED  | 0.03           | 3             | 0.1     | Normal     | 159Tb (KED) |
| 139La (KED) | KED  | 0.03           | 3             | 0.1     | Normal     | 159Tb (KED) |
| 140Ce (KED) | KED  | 0.03           | 3             | 0.1     | Normal     | 159Tb (KED) |
| 141Pr (KED) | KED  | 0.03           | 3             | 0.1     | Normal     | 159Tb (KED) |
| 142Nd (KED) | KED  | 0.03           | 3             | 0.1     | Normal     | 159Tb (KED) |
| 152Sm (KED) | KED  | 0.03           | 3             | 0.1     | Normal     | 159Tb (KED) |
| 153Eu (KED) | KED  | 0.03           | 3             | 0.1     | Normal     | 159Tb (KED) |
| 158Gd (KED) | KED  | 0.03           | 3             | 0.1     | Normal     | 159Tb (KED) |
| 159Tb (KED) | KED  | 0.03           | 3             | 0.1     | Normal     |             |
| 164Dy (KED) | KED  | 0.03           | 3             | 0.1     | Normal     | 159Tb (KED) |
| 166Er (KED) | KED  | 0.03           | 3             | 0.1     | Normal     | 159Tb (KED) |
| 169Tm (KED) | KED  | 0.03           | 3             | 0.1     | Normal     | 159Tb (KED) |
| 174Yb (KED) | KED  | 0.03           | 3             | 0.1     | Normal     | 159Tb (KED) |
| 175Lu (KED) | KED  | 0.03           | 3             | 0.1     | Normal     | 159Tb (KED) |
| 205Tl (KED) | KED  | 0.03           | 3             | 0.1     | Normal     | 209Bi (KED) |
| 208Pb (KED) | KED  | 0.03           | 3             | 0.1     | Normal     | 209Bi (KED) |
| 209Bi (KED) | KED  | 0.03           | 3             | 0.1     | Normal     |             |
| 232Th (KED) | KED  | 0.03           | 3             | 0.1     | Normal     | 209Bi (KED) |
| 238U (KED)  | KED  | 0.03           | 3             | 0.1     | Normal     | 209Bi (KED) |

| Isotope     | Mode | Dwell time (s) | # of Channels | Spacing | Resolution |
|-------------|------|----------------|---------------|---------|------------|
| 6Li (KED)   | KED  | 0.03           | 3             | 0.1     | Normal     |
| 45Sc (KED)  | KED  | 0.03           | 3             | 0.1     | Normal     |
| 89Y (KED)   | KED  | 0.03           | 3             | 0.1     | Normal     |
| 115In (KED) | KED  | 0.03           | 3             | 0.1     | Normal     |
| 159Tb (KED) | KED  | 0.03           | 3             | 0.1     | Normal     |
| 209Bi (KED) | KED  | 0.03           | 3             | 0.1     | Normal     |

| No. of sweeps | Time per sweep[s] | Time per main run[s] |
|---------------|-------------------|----------------------|
| 10            | 3.87              | 38.7                 |

## Calibration Curves:

9Be (KED)

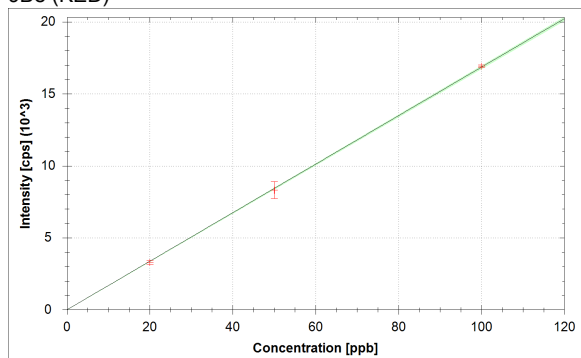

$$f(x) = 168.5303 \cdot x$$

$$R^2 = 0.9999$$

$$\text{BEC} = 0.000 \text{ ppb}$$

$$\text{LoD} = 0.0000 \text{ ppb}$$

11B (KED)

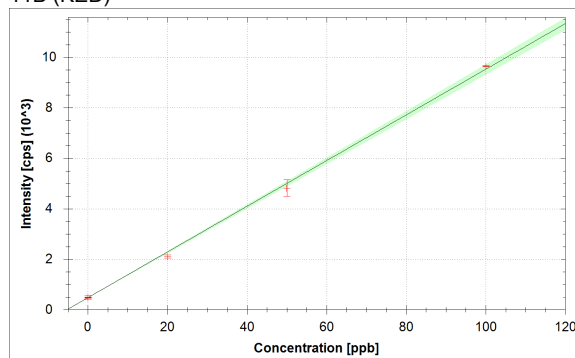

$$f(x) = 90.4374 \cdot x + 478.5733$$

$$R^2 = 0.9986$$

$$\text{BEC} = 5.292 \text{ ppb}$$

$$\text{LoD} = 0.8479 \text{ ppb}$$

24Mg (KED)

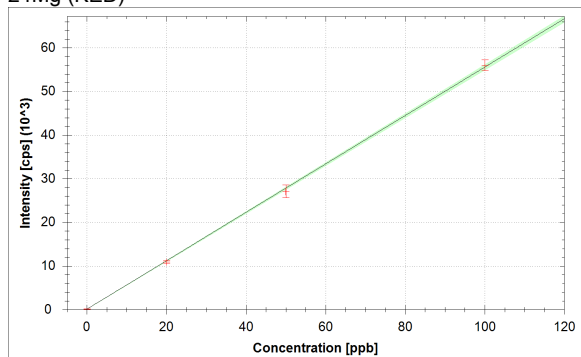

$$f(x) = 554.6889 \cdot x + 99.9433$$

$$R^2 = 0.9996$$

$$\text{BEC} = 0.180 \text{ ppb}$$

$$\text{LoD} = 0.0396 \text{ ppb}$$

27Al (KED)

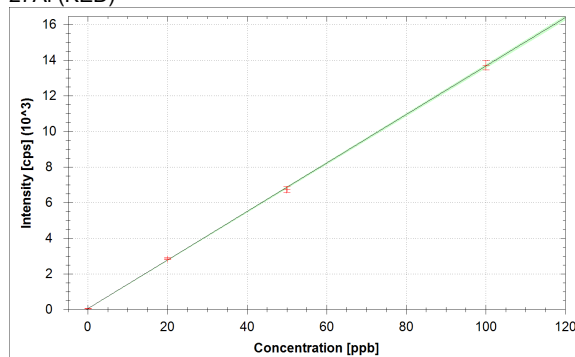

$$f(x) = 136.0916 \cdot x + 57.0807$$

$$R^2 = 0.9998$$

$$\text{BEC} = 0.419 \text{ ppb}$$

$$\text{LoD} = 0.1715 \text{ ppb}$$

51V (KED)

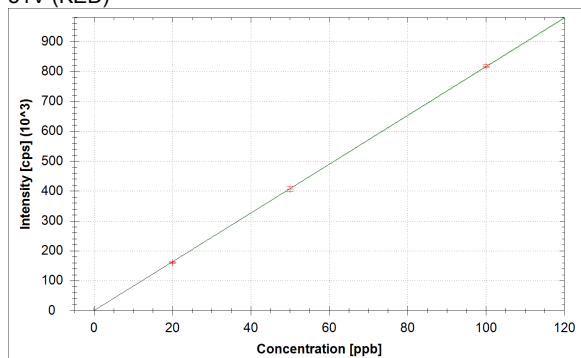

$$f(x) = 8156.1372 \cdot x + 2.1897$$

$$R^2 = 1.0000$$

$$\text{BEC} = 0.000 \text{ ppb}$$

$$\text{LoD} = 0.0018 \text{ ppb}$$

52Cr (KED)

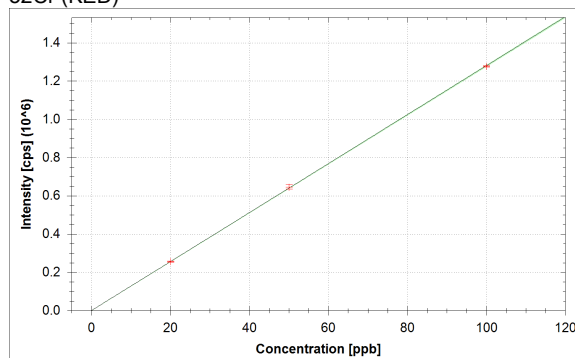

$$f(x) = 12800.9019 \cdot x + 82.8092$$

$$R^2 = 1.0000$$

$$\text{BEC} = 0.006 \text{ ppb}$$

$$\text{LoD} = 0.0034 \text{ ppb}$$

55Mn (KED)

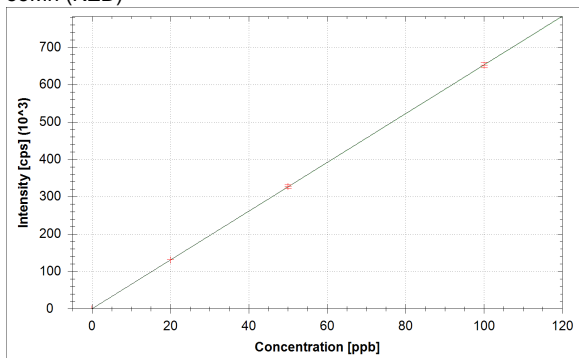

$$f(x) = 6526.3191 \cdot x + 39.8789$$

$$R^2 = 1.0000$$

$$\text{BEC} = 0.006 \text{ ppb}$$

$$\text{LoD} = 0.0050 \text{ ppb}$$

56Fe (KED)

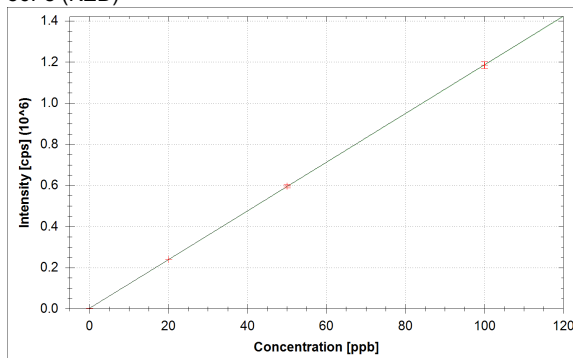

$$f(x) = 11843.5307 \cdot x + 1961.6738$$

$$R^2 = 1.0000$$

$$\text{BEC} = 0.166 \text{ ppb}$$

$$\text{LoD} = 0.0500 \text{ ppb}$$

58Ni (KED)

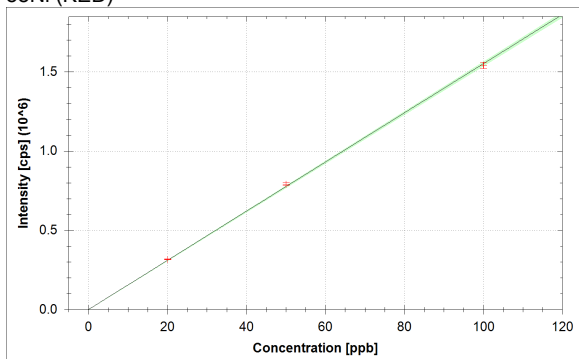

$$f(x) = 15509.4362 \cdot x + 266.6785$$

$$R^2 = 0.9998$$

$$\text{BEC} = 0.017 \text{ ppb}$$

$$\text{LoD} = 0.0022 \text{ ppb}$$

59Co (KED)

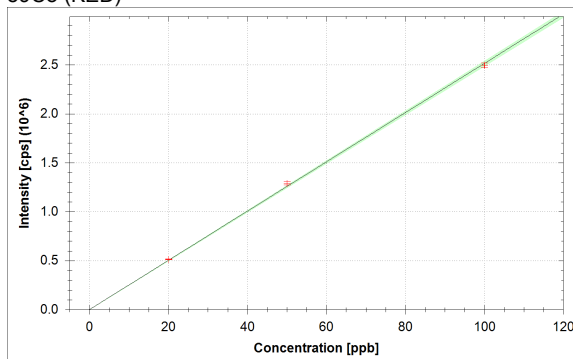

$$f(x) = 25143.7457 \cdot x + 20.4411$$

$$R^2 = 0.9997$$

$$\text{BEC} = 0.001 \text{ ppb}$$

$$\text{LoD} = 0.0013 \text{ ppb}$$

63Cu (KED)

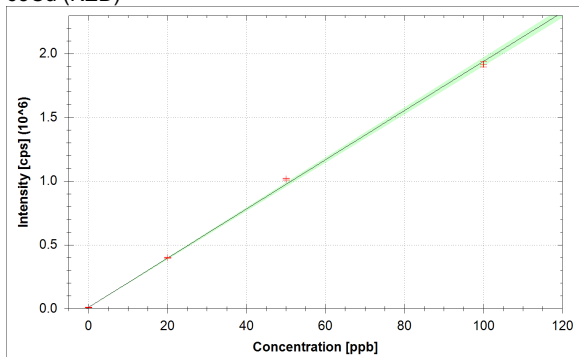

$$f(x) = 19280.5776 \cdot x + 9254.7909$$

$$R^2 = 0.9991$$

$$\text{BEC} = 0.480 \text{ ppb}$$

$$\text{LoD} = 0.1937 \text{ ppb}$$

64Zn (KED)

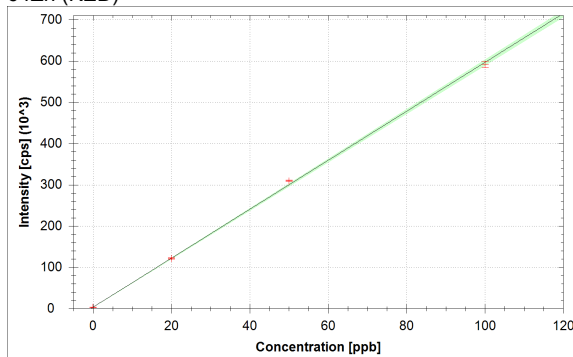

$$f(x) = 5932.7483 \cdot x + 3357.8830$$

$$R^2 = 0.9996$$

$$\text{BEC} = 0.566 \text{ ppb}$$

$$\text{LoD} = 0.1490 \text{ ppb}$$

69Ga (KED)

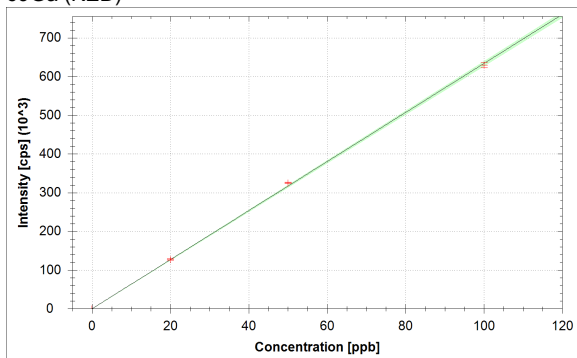

$$f(x) = 6337.6462 \cdot x + 66.7416$$

$$R^2 = 0.9997$$

$$\text{BEC} = 0.011 \text{ ppb}$$

$$\text{LoD} = 0.0127 \text{ ppb}$$

75As (KED)

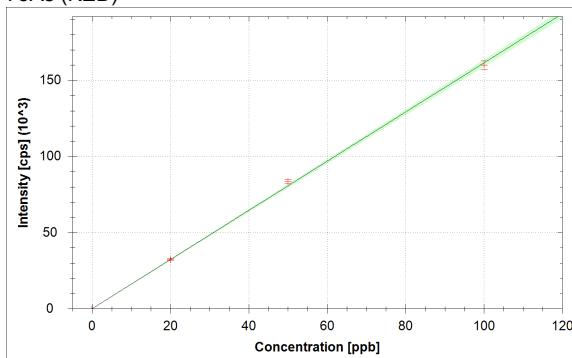

$$f(x) = 1614.1332 \cdot x + 15.0996$$

$$R^2 = 0.9995$$

$$\text{BEC} = 0.009 \text{ ppb}$$

$$\text{LoD} = 0.0181 \text{ ppb}$$

80Se (KED)

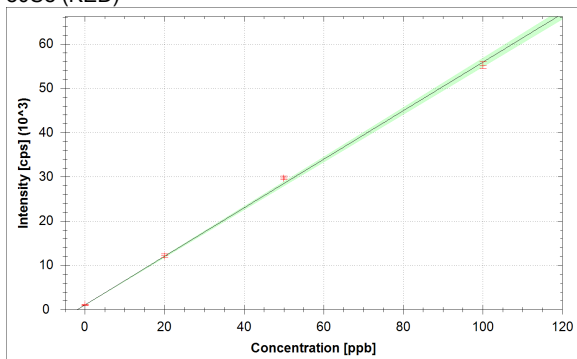

$$f(x) = 548.4486 \cdot x + 1039.1245$$

$$R^2 = 0.9990$$

$$\text{BEC} = 1.895 \text{ ppb}$$

$$\text{LoD} = 0.3304 \text{ ppb}$$

85Rb (KED)

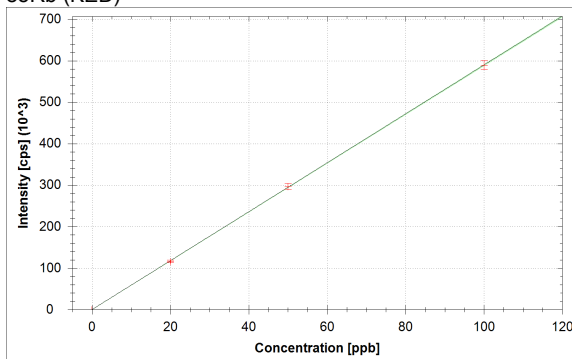

$$f(x) = 5896.4720 \cdot x + 10.7646$$

$$R^2 = 1.0000$$

$$\text{BEC} = 0.002 \text{ ppb}$$

$$\text{LoD} = 0.0017 \text{ ppb}$$

88Sr (KED)

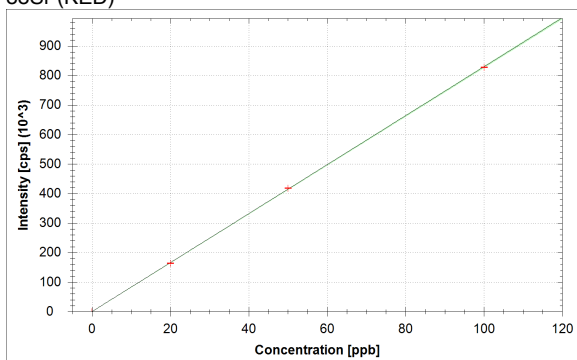

$$f(x) = 8295.1878 \cdot x + 97.8230$$

$$R^2 = 1.0000$$

$$\text{BEC} = 0.012 \text{ ppb}$$

$$\text{LoD} = 0.0028 \text{ ppb}$$

107Ag (KED)

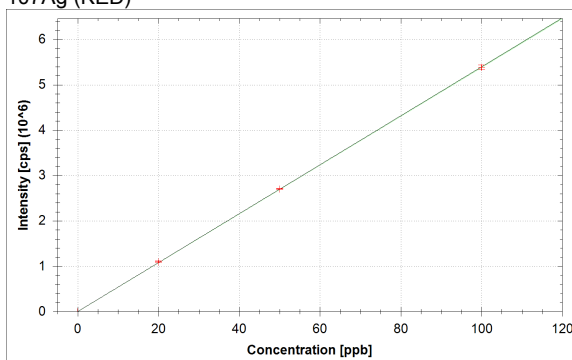

$$f(x) = 53938.4634 \cdot x + 42.7795$$

$$R^2 = 1.0000$$

$$\text{BEC} = 0.001 \text{ ppb}$$

$$\text{LoD} = 0.0002 \text{ ppb}$$

114Cd (KED)

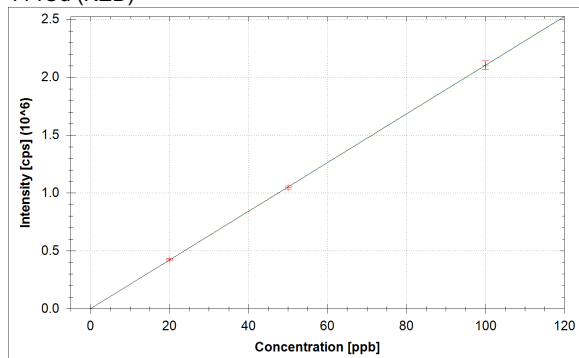

$$f(x) = 21030.1182 \cdot x + 85.4880$$

$$R^2 = 1.0000$$

$$\text{BEC} = 0.004 \text{ ppb}$$

$$\text{LoD} = 0.0010 \text{ ppb}$$

133Cs (KED)

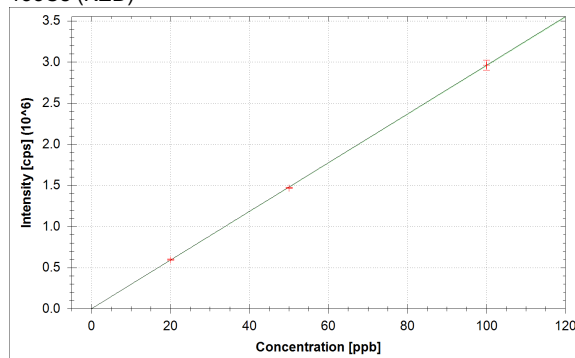

$$f(x) = 29577.1503 \cdot x + 12.0608$$

$$R^2 = 1.0000$$

$$\text{BEC} = 0.000 \text{ ppb}$$

$$\text{LoD} = 0.0007 \text{ ppb}$$

138Ba (KED)

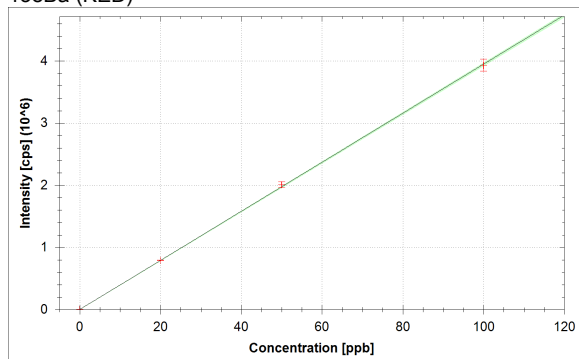

$$f(x) = 39465.1520 \cdot x + 1360.7026$$

$$R^2 = 0.9999$$

$$\text{BEC} = 0.034 \text{ ppb}$$

$$\text{LoD} = 0.0069 \text{ ppb}$$

139La (KED)

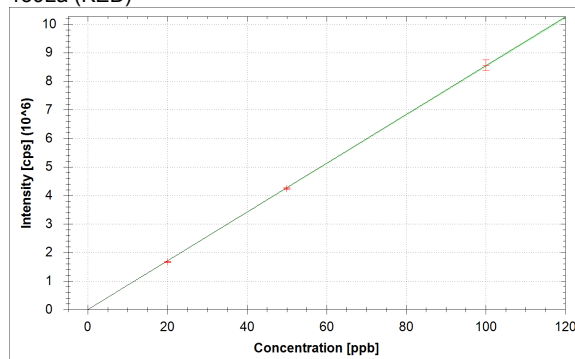

$$f(x) = 85384.9252 \cdot x + 25.8902$$

$$R^2 = 0.9999$$

$$\text{BEC} = 0.000 \text{ ppb}$$

$$\text{LoD} = 0.0004 \text{ ppb}$$

140Ce (KED)

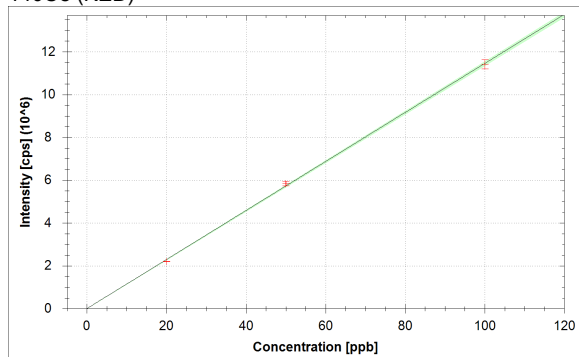

$$f(x) = 114526.2079 \cdot x + 352.1196$$

$$R^2 = 0.9998$$

$$\text{BEC} = 0.003 \text{ ppb}$$

$$\text{LoD} = 0.0011 \text{ ppb}$$

141Pr (KED)

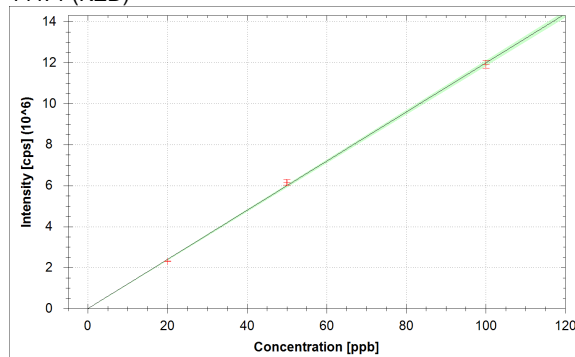

$$f(x) = 119851.9334 \cdot x + 24.8268$$

$$R^2 = 0.9996$$

$$\text{BEC} = 0.000 \text{ ppb}$$

$$\text{LoD} = 0.0004 \text{ ppb}$$

142Nd (KED)

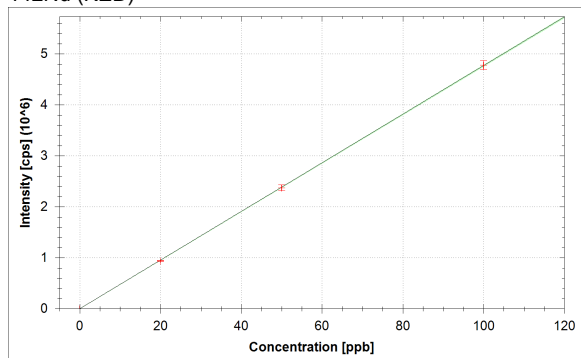

$$f(x) = 47688.1700 \cdot x + 49.6843$$

$$R^2 = 1.0000$$

$$\text{BEC} = 0.001 \text{ ppb}$$

$$\text{LoD} = 0.0004 \text{ ppb}$$

152Sm (KED)

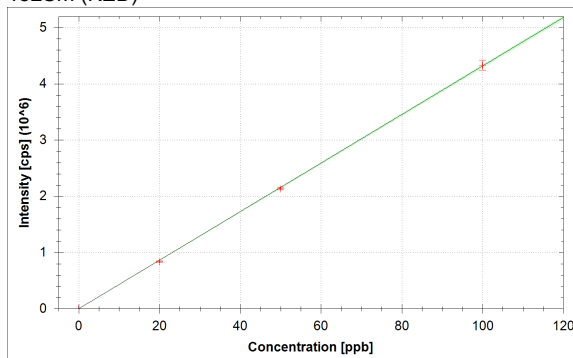

$$f(x) = 43156.7444 \cdot x + 9.7214$$

$$R^2 = 0.9999$$

$$\text{BEC} = 0.000 \text{ ppb}$$

$$\text{LoD} = 0.0004 \text{ ppb}$$

153Eu (KED)

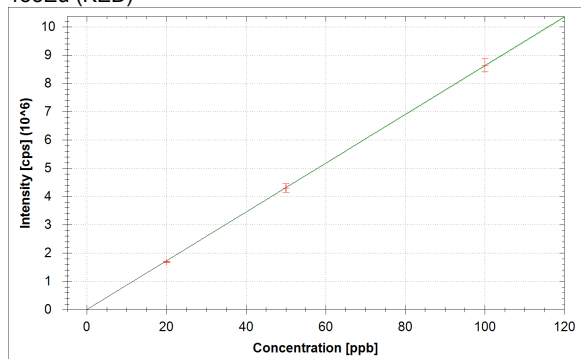

$$f(x) = 86242.9897 \cdot x + 25.9157$$

$$R^2 = 1.0000$$

$$\text{BEC} = 0.000 \text{ ppb}$$

$$\text{LoD} = 0.0001 \text{ ppb}$$

158Gd (KED)

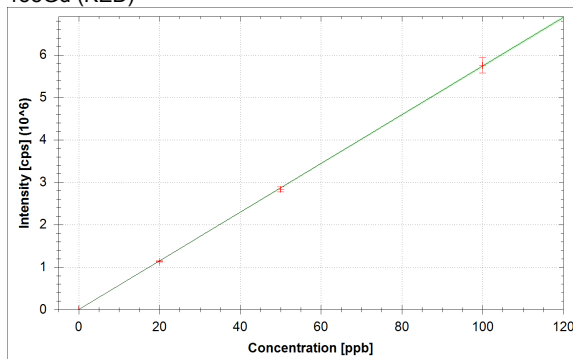

$$f(x) = 57358.9550 \cdot x + 15.0795$$

$$R^2 = 0.9999$$

$$\text{BEC} = 0.000 \text{ ppb}$$

$$\text{LoD} = 0.0000 \text{ ppb}$$

164Dy (KED)

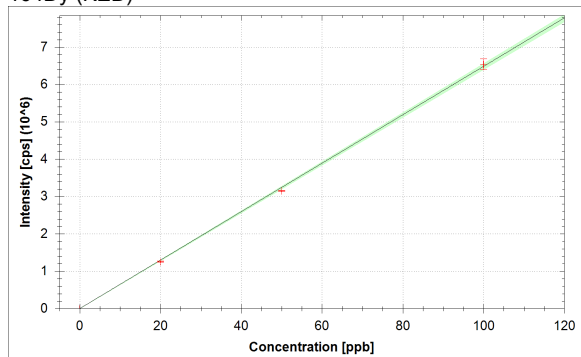

$$f(x) = 64846.4055 \cdot x + 19.5206$$

$$R^2 = 0.9995$$

$$\text{BEC} = 0.000 \text{ ppb}$$

$$\text{LoD} = 0.0000 \text{ ppb}$$

166Er (KED)

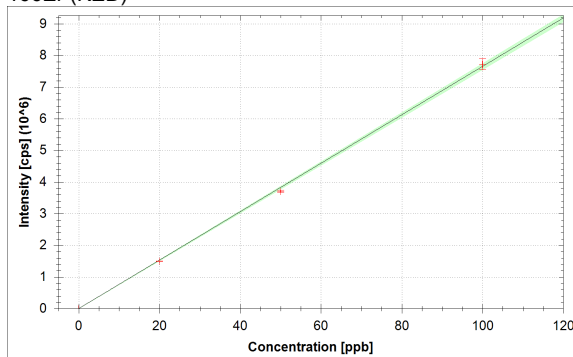

$$f(x) = 76567.7048 \cdot x + 538.3873$$

$$R^2 = 0.9995$$

$$\text{BEC} = 0.007 \text{ ppb}$$

$$\text{LoD} = 0.0007 \text{ ppb}$$

169Tm (KED)

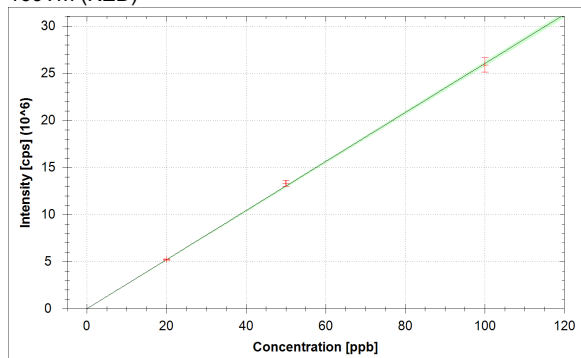

$$f(x) = 260271.1084 \cdot x + 36.8105$$

$$R^2 = 0.9997$$

$$\text{BEC} = 0.000 \text{ ppb}$$

$$\text{LoD} = 0.0000 \text{ ppb}$$

174Yb (KED)

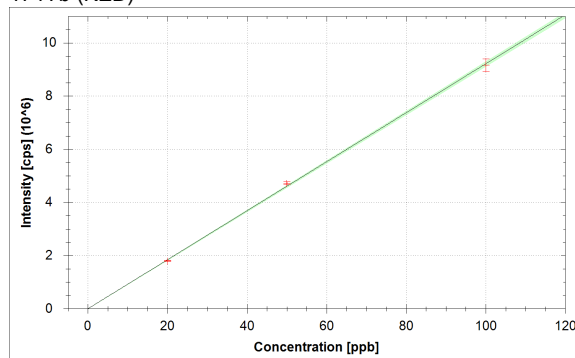

$$f(x) = 92102.3250 \cdot x + 27.9984$$

$$R^2 = 0.9997$$

$$\text{BEC} = 0.000 \text{ ppb}$$

$$\text{LoD} = 0.0002 \text{ ppb}$$

175Lu (KED)

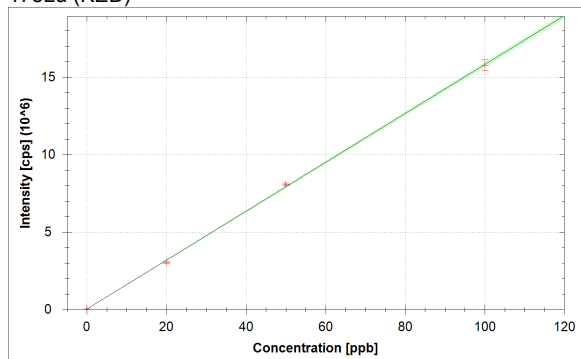

$$f(x) = 157813.4836 \cdot x + 36501.9693$$

$$R^2 = 0.9997$$

$$\text{BEC} = 0.231 \text{ ppb}$$

$$\text{LoD} = 0.0371 \text{ ppb}$$

205Tl (KED)

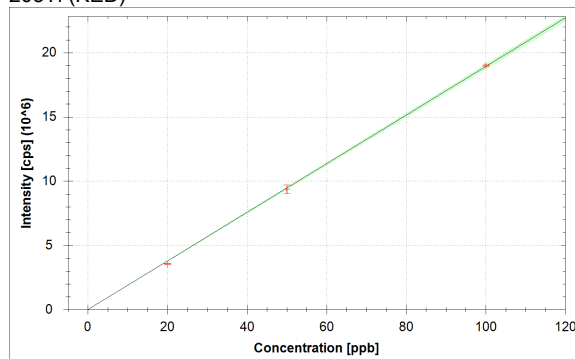

$$f(x) = 189206.9364 \cdot x + 18.6477$$

$$R^2 = 0.9997$$

$$\text{BEC} = 0.000 \text{ ppb}$$

$$\text{LoD} = 0.0001 \text{ ppb}$$

208Pb (KED)

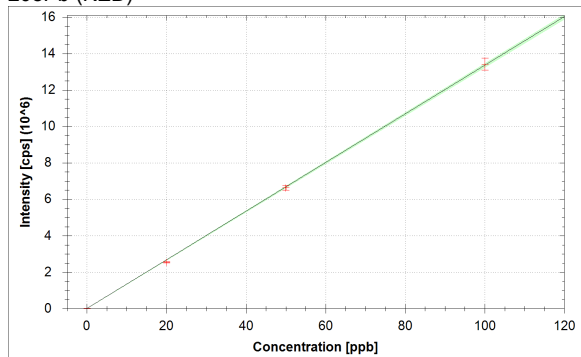

$$f(x) = 133500.7795 \cdot x + 7411.7417$$

$$R^2 = 0.9998$$

$$\text{BEC} = 0.056 \text{ ppb}$$

$$\text{LoD} = 0.0036 \text{ ppb}$$

232Th (KED)

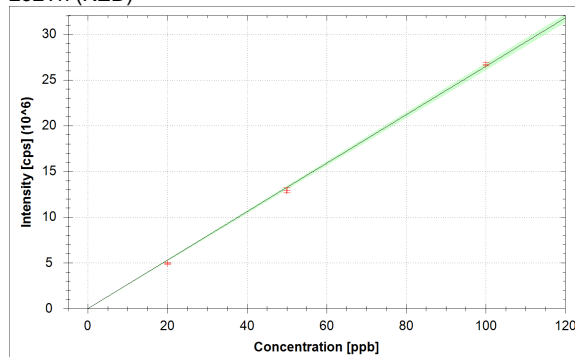

$$f(x) = 264759.9429 \cdot x + 106.5982$$

$$R^2 = 0.9994$$

$$\text{BEC} = 0.000 \text{ ppb}$$

$$\text{LoD} = 0.0001 \text{ ppb}$$

238U (KED)

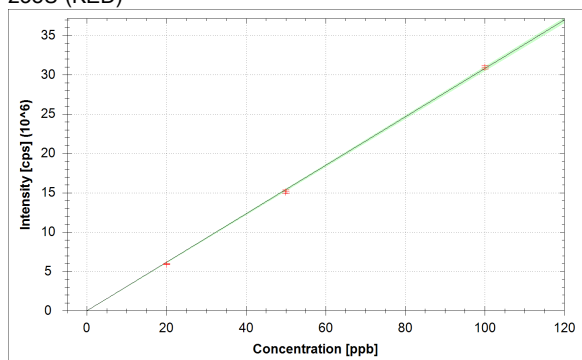

$$f(x) = 307906.0769 \cdot x + 145.2650$$

$$R^2 = 0.9998$$

$$\text{BEC} = 0.000 \text{ ppb}$$

$$\text{LoD} = 0.0003 \text{ ppb}$$

**Standards:**

Analysis Index: 3  
 Analysis Name: 0+20  
 Analysis Type: STD  
 Analysis Started at: 10/18/2021 3:05:48 PM  
 Standard (Stock): std0  
 Standard DF: 1

| Category    | Concentration average | Concentration RSD | Standard Concentration |
|-------------|-----------------------|-------------------|------------------------|
| 6Li (KED)   | 100.853 %             |                   |                        |
| 9Be (KED)   | 0.000 ppb             |                   | 0.000 ppb              |
| 11B (KED)   | 0.000 ppb             | 0.2 %             | 0.000 ppb              |
| 24Mg (KED)  | 0.000 ppb             | 0.3 %             | 0.000 ppb              |
| 27Al (KED)  | 0.000 ppb             | 0.1 %             | 0.000 ppb              |
| 45Sc (KED)  | 103.251 %             |                   |                        |
| 51V (KED)   | 0.000 ppb             | 1.7 %             | 0.000 ppb              |
| 52Cr (KED)  | 0.000 ppb             | 0.2 %             | 0.000 ppb              |
| 55Mn (KED)  | 0.000 ppb             | 0.5 %             | 0.000 ppb              |
| 56Fe (KED)  | 0.000 ppb             | 0.1 %             | 0.000 ppb              |
| 58Ni (KED)  | 0.000 ppb             | 0.1 %             | 0.000 ppb              |
| 59Co (KED)  | 0.000 ppb             | 0.1 %             | 0.000 ppb              |
| 63Cu (KED)  | 0.000 ppb             | 0.2 %             | 0.000 ppb              |
| 64Zn (KED)  | 0.000 ppb             | 0.1 %             | 0.000 ppb              |
| 69Ga (KED)  | 0.000 ppb             | 0.3 %             | 0.000 ppb              |
| 75As (KED)  | 0.000 ppb             | 0.7 %             | 0.000 ppb              |
| 80Se (KED)  | 0.000 ppb             | 0.1 %             | 0.000 ppb              |
| 85Rb (KED)  | 0.000 ppb             | 0.5 %             | 0.000 ppb              |
| 88Sr (KED)  | 0.000 ppb             | 0.1 %             | 0.000 ppb              |
| 89Y (KED)   | 103.345 %             |                   |                        |
| 107Ag (KED) | 0.000 ppb             | 0.1 %             | 0.000 ppb              |
| 114Cd (KED) | 0.000 ppb             | 0.1 %             | 0.000 ppb              |
| 115In (KED) | 101.306 %             |                   |                        |
| 133Cs (KED) | 0.000 ppb             | 0.2 %             | 0.000 ppb              |
| 138Ba (KED) | 0.000 ppb             | 0.2 %             | 0.000 ppb              |
| 139La (KED) | 0.000 ppb             | 0.3 %             | 0.000 ppb              |
| 140Ce (KED) | 0.000 ppb             | 0.1 %             | 0.000 ppb              |
| 141Pr (KED) | 0.000 ppb             | 0.3 %             | 0.000 ppb              |
| 142Nd (KED) | 0.000 ppb             | 0.3 %             | 0.000 ppb              |
| 152Sm (KED) | 0.000 ppb             | 0.6 %             | 0.000 ppb              |
| 153Eu (KED) | 0.000 ppb             | 0.2 %             | 0.000 ppb              |
| 158Gd (KED) | 0.000 ppb             | 0.7 %             | 0.000 ppb              |
| 159Tb (KED) | 102.801 %             |                   |                        |
| 164Dy (KED) | 0.000 ppb             | 0.6 %             | 0.000 ppb              |
| 166Er (KED) | 0.000 ppb             | 0.1 %             | 0.000 ppb              |
| 169Tm (KED) | 0.000 ppb             | 0.3 %             | 0.000 ppb              |
| 174Yb (KED) | 0.000 ppb             | 0.6 %             | 0.000 ppb              |
| 175Lu (KED) | 0.000 ppb             | 0.0 %             | 0.000 ppb              |
| 205Tl (KED) | 0.000 ppb             | 0.6 %             | 0.000 ppb              |
| 208Pb (KED) | 0.000 ppb             | 0.0 %             | 0.000 ppb              |
| 209Bi (KED) | 100.950 %             |                   |                        |
| 232Th (KED) | 0.000 ppb             | 0.3 %             | 0.000 ppb              |
| 238U (KED)  | 0.000 ppb             | 0.2 %             | 0.000 ppb              |

**Standards:**

Analysis Index: 4  
 Analysis Name: 20+20  
 Analysis Type: STD  
 Analysis Started at: 10/18/2021 3:09:14 PM  
 Standard (Stock): std3  
 Standard DF: 1

| Category    | Concentration average | Concentration RSD | Standard Concentration |
|-------------|-----------------------|-------------------|------------------------|
| 6Li (KED)   | 100.927 %             |                   |                        |
| 9Be (KED)   | 19.547 ppb            | 4.2 %             | 20.000 ppb             |
| 11B (KED)   | 17.992 ppb            | 3.7 %             | 20.000 ppb             |
| 24Mg (KED)  | 19.519 ppb            | 3.0 %             | 20.000 ppb             |
| 27Al (KED)  | 20.492 ppb            | 1.8 %             | 20.000 ppb             |
| 45Sc (KED)  | 105.928 %             |                   |                        |
| 51V (KED)   | 19.631 ppb            | 1.4 %             | 20.000 ppb             |
| 52Cr (KED)  | 19.962 ppb            | 1.4 %             | 20.000 ppb             |
| 55Mn (KED)  | 20.053 ppb            | 0.2 %             | 20.000 ppb             |
| 56Fe (KED)  | 20.096 ppb            | 0.4 %             | 20.000 ppb             |
| 58Ni (KED)  | 20.445 ppb            | 0.6 %             | 20.000 ppb             |
| 59Co (KED)  | 20.428 ppb            | 0.9 %             | 20.000 ppb             |
| 63Cu (KED)  | 20.226 ppb            | 1.1 %             | 20.000 ppb             |
| 64Zn (KED)  | 19.944 ppb            | 1.3 %             | 20.000 ppb             |
| 69Ga (KED)  | 20.073 ppb            | 1.5 %             | 20.000 ppb             |
| 75As (KED)  | 20.066 ppb            | 2.3 %             | 20.000 ppb             |
| 80Se (KED)  | 20.221 ppb            | 3.8 %             | 20.000 ppb             |
| 85Rb (KED)  | 19.642 ppb            | 3.0 %             | 20.000 ppb             |
| 88Sr (KED)  | 19.737 ppb            | 0.7 %             | 20.000 ppb             |
| 89Y (KED)   | 105.847 %             |                   |                        |
| 107Ag (KED) | 20.325 ppb            | 1.4 %             | 20.000 ppb             |
| 114Cd (KED) | 20.077 ppb            | 2.2 %             | 20.000 ppb             |
| 115In (KED) | 104.235 %             |                   |                        |
| 133Cs (KED) | 20.087 ppb            | 1.7 %             | 20.000 ppb             |
| 138Ba (KED) | 20.076 ppb            | 0.4 %             | 20.000 ppb             |
| 139La (KED) | 19.438 ppb            | 1.0 %             | 20.000 ppb             |
| 140Ce (KED) | 19.191 ppb            | 0.4 %             | 20.000 ppb             |
| 141Pr (KED) | 19.270 ppb            | 0.7 %             | 20.000 ppb             |
| 142Nd (KED) | 19.613 ppb            | 1.3 %             | 20.000 ppb             |
| 152Sm (KED) | 19.327 ppb            | 1.6 %             | 20.000 ppb             |
| 153Eu (KED) | 19.529 ppb            | 1.1 %             | 20.000 ppb             |
| 158Gd (KED) | 19.756 ppb            | 1.2 %             | 20.000 ppb             |
| 159Tb (KED) | 104.526 %             |                   |                        |
| 164Dy (KED) | 19.380 ppb            | 1.6 %             | 20.000 ppb             |
| 166Er (KED) | 19.553 ppb            | 0.4 %             | 20.000 ppb             |
| 169Tm (KED) | 20.071 ppb            | 1.0 %             | 20.000 ppb             |
| 174Yb (KED) | 19.456 ppb            | 1.0 %             | 20.000 ppb             |
| 175Lu (KED) | 18.984 ppb            | 2.2 %             | 20.000 ppb             |
| 205Tl (KED) | 18.710 ppb            | 0.9 %             | 20.000 ppb             |
| 208Pb (KED) | 18.932 ppb            | 1.2 %             | 20.000 ppb             |
| 209Bi (KED) | 103.295 %             |                   |                        |
| 232Th (KED) | 18.642 ppb            | 2.1 %             | 20.000 ppb             |
| 238U (KED)  | 19.238 ppb            | 0.8 %             | 20.000 ppb             |

**Standards:**

Analysis Index: 5  
 Analysis Name: 50+20  
 Analysis Type: STD  
 Analysis Started at: 10/18/2021 3:13:08 PM  
 Standard (Stock): std1  
 Standard DF: 1

| Category    | Concentration average | Concentration RSD | Standard Concentration |
|-------------|-----------------------|-------------------|------------------------|
| 6Li (KED)   | 103.596 %             |                   |                        |
| 9Be (KED)   | 49.284 ppb            | 7.1 %             | 50.000 ppb             |
| 11B (KED)   | 48.006 ppb            | 7.5 %             | 50.000 ppb             |
| 24Mg (KED)  | 48.620 ppb            | 5.4 %             | 50.000 ppb             |
| 27Al (KED)  | 49.097 ppb            | 2.4 %             | 50.000 ppb             |
| 45Sc (KED)  | 107.963 %             |                   |                        |
| 51V (KED)   | 49.794 ppb            | 2.3 %             | 50.000 ppb             |
| 52Cr (KED)  | 50.468 ppb            | 1.7 %             | 50.000 ppb             |
| 55Mn (KED)  | 50.131 ppb            | 1.5 %             | 50.000 ppb             |
| 56Fe (KED)  | 50.166 ppb            | 1.4 %             | 50.000 ppb             |
| 58Ni (KED)  | 51.060 ppb            | 1.5 %             | 50.000 ppb             |
| 59Co (KED)  | 51.309 ppb            | 1.4 %             | 50.000 ppb             |
| 63Cu (KED)  | 52.159 ppb            | 0.9 %             | 50.000 ppb             |
| 64Zn (KED)  | 51.545 ppb            | 0.6 %             | 50.000 ppb             |
| 69Ga (KED)  | 51.287 ppb            | 0.6 %             | 50.000 ppb             |
| 75As (KED)  | 51.733 ppb            | 1.6 %             | 50.000 ppb             |
| 80Se (KED)  | 52.362 ppb            | 1.5 %             | 50.000 ppb             |
| 85Rb (KED)  | 50.329 ppb            | 2.1 %             | 50.000 ppb             |
| 88Sr (KED)  | 50.475 ppb            | 0.5 %             | 50.000 ppb             |
| 89Y (KED)   | 105.636 %             |                   |                        |
| 107Ag (KED) | 50.127 ppb            | 0.3 %             | 50.000 ppb             |
| 114Cd (KED) | 49.816 ppb            | 1.2 %             | 50.000 ppb             |
| 115In (KED) | 106.758 %             |                   |                        |
| 133Cs (KED) | 49.693 ppb            | 0.6 %             | 50.000 ppb             |
| 138Ba (KED) | 50.850 ppb            | 2.4 %             | 50.000 ppb             |
| 139La (KED) | 49.713 ppb            | 1.1 %             | 50.000 ppb             |
| 140Ce (KED) | 50.971 ppb            | 1.9 %             | 50.000 ppb             |
| 141Pr (KED) | 51.315 ppb            | 2.2 %             | 50.000 ppb             |
| 142Nd (KED) | 49.744 ppb            | 2.3 %             | 50.000 ppb             |
| 152Sm (KED) | 49.501 ppb            | 1.2 %             | 50.000 ppb             |
| 153Eu (KED) | 49.788 ppb            | 3.4 %             | 50.000 ppb             |
| 158Gd (KED) | 49.404 ppb            | 2.1 %             | 50.000 ppb             |
| 159Tb (KED) | 104.831 %             |                   |                        |
| 164Dy (KED) | 48.490 ppb            | 0.4 %             | 50.000 ppb             |
| 166Er (KED) | 48.397 ppb            | 0.9 %             | 50.000 ppb             |
| 169Tm (KED) | 51.196 ppb            | 2.5 %             | 50.000 ppb             |
| 174Yb (KED) | 51.263 ppb            | 1.1 %             | 50.000 ppb             |
| 175Lu (KED) | 50.975 ppb            | 1.2 %             | 50.000 ppb             |
| 205Tl (KED) | 49.482 ppb            | 3.7 %             | 50.000 ppb             |
| 208Pb (KED) | 49.588 ppb            | 2.0 %             | 50.000 ppb             |
| 209Bi (KED) | 102.680 %             |                   |                        |
| 232Th (KED) | 48.788 ppb            | 2.1 %             | 50.000 ppb             |
| 238U (KED)  | 49.112 ppb            | 1.7 %             | 50.000 ppb             |

**Standards:**

Analysis Index: 6  
 Analysis Name: 100+20  
 Analysis Type: STD  
 Analysis Started at: 10/18/2021 3:17:24 PM  
 Standard (Stock): std2  
 Standard DF: 1

| Category    | Concentration average | Concentration RSD | Standard Concentration |
|-------------|-----------------------|-------------------|------------------------|
| 6Li (KED)   | 102.150 %             |                   |                        |
| 9Be (KED)   | 100.448 ppb           | 0.5 %             | 100.000 ppb            |
| 11B (KED)   | 101.399 ppb           | 0.2 %             | 100.000 ppb            |
| 24Mg (KED)  | 100.786 ppb           | 2.1 %             | 100.000 ppb            |
| 27Al (KED)  | 100.353 ppb           | 1.9 %             | 100.000 ppb            |
| 45Sc (KED)  | 111.998 %             |                   |                        |
| 51V (KED)   | 100.177 ppb           | 0.7 %             | 100.000 ppb            |
| 52Cr (KED)  | 99.774 ppb            | 0.4 %             | 100.000 ppb            |
| 55Mn (KED)  | 99.924 ppb            | 1.1 %             | 100.000 ppb            |
| 56Fe (KED)  | 99.898 ppb            | 1.4 %             | 100.000 ppb            |
| 58Ni (KED)  | 99.381 ppb            | 1.3 %             | 100.000 ppb            |
| 59Co (KED)  | 99.260 ppb            | 1.0 %             | 100.000 ppb            |
| 63Cu (KED)  | 98.875 ppb            | 1.1 %             | 100.000 ppb            |
| 64Zn (KED)  | 99.239 ppb            | 1.2 %             | 100.000 ppb            |
| 69Ga (KED)  | 99.342 ppb            | 1.1 %             | 100.000 ppb            |
| 75As (KED)  | 99.120 ppb            | 1.8 %             | 100.000 ppb            |
| 80Se (KED)  | 98.775 ppb            | 1.5 %             | 100.000 ppb            |
| 85Rb (KED)  | 99.907 ppb            | 1.8 %             | 100.000 ppb            |
| 88Sr (KED)  | 99.815 ppb            | 0.2 %             | 100.000 ppb            |
| 89Y (KED)   | 112.025 %             |                   |                        |
| 107Ag (KED) | 99.872 ppb            | 0.9 %             | 100.000 ppb            |
| 114Cd (KED) | 100.076 ppb           | 1.9 %             | 100.000 ppb            |
| 115In (KED) | 109.708 %             |                   |                        |
| 133Cs (KED) | 100.136 ppb           | 2.0 %             | 100.000 ppb            |
| 138Ba (KED) | 99.560 ppb            | 2.4 %             | 100.000 ppb            |
| 139La (KED) | 100.256 ppb           | 2.1 %             | 100.000 ppb            |
| 140Ce (KED) | 99.676 ppb            | 1.9 %             | 100.000 ppb            |
| 141Pr (KED) | 99.489 ppb            | 1.6 %             | 100.000 ppb            |
| 142Nd (KED) | 100.205 ppb           | 1.8 %             | 100.000 ppb            |
| 152Sm (KED) | 100.384 ppb           | 2.0 %             | 100.000 ppb            |
| 153Eu (KED) | 100.200 ppb           | 2.7 %             | 100.000 ppb            |
| 158Gd (KED) | 100.347 ppb           | 3.1 %             | 100.000 ppb            |
| 159Tb (KED) | 111.609 %             |                   |                        |
| 164Dy (KED) | 100.879 ppb           | 2.3 %             | 100.000 ppb            |
| 166Er (KED) | 100.891 ppb           | 2.3 %             | 100.000 ppb            |
| 169Tm (KED) | 99.388 ppb            | 2.9 %             | 100.000 ppb            |
| 174Yb (KED) | 99.477 ppb            | 2.6 %             | 100.000 ppb            |
| 175Lu (KED) | 99.716 ppb            | 2.2 %             | 100.000 ppb            |
| 205Tl (KED) | 100.517 ppb           | 0.4 %             | 100.000 ppb            |
| 208Pb (KED) | 100.420 ppb           | 2.4 %             | 100.000 ppb            |
| 209Bi (KED) | 105.356 %             |                   |                        |
| 232Th (KED) | 100.878 ppb           | 0.7 %             | 100.000 ppb            |
| 238U (KED)  | 100.597 ppb           | 0.8 %             | 100.000 ppb            |

## Sample List Summary:

Instrument ID: iCAP Q

| Index: | Label:    | Main<br>Runs: | Survey<br>Runs: | Start Time:           | User name:                    |
|--------|-----------|---------------|-----------------|-----------------------|-------------------------------|
| 1      | water     | 3             | 0               | 10/18/2021 2:59:09 PM | WINDOWS-UPCI4ER\Administrator |
| 2      | blk       | 3             | 0               | 10/18/2021 3:02:09 PM | WINDOWS-UPCI4ER\Administrator |
| 3      | 0+20      | 3             | 0               | 10/18/2021 3:05:48 PM | WINDOWS-UPCI4ER\Administrator |
| 4      | 20+20     | 3             | 0               | 10/18/2021 3:09:14 PM | WINDOWS-UPCI4ER\Administrator |
| 5      | 50+20     | 3             | 0               | 10/18/2021 3:13:08 PM | WINDOWS-UPCI4ER\Administrator |
| 6      | 100+20    | 3             | 0               | 10/18/2021 3:17:24 PM | WINDOWS-UPCI4ER\Administrator |
| 7      | w127ti    | 3             | 0               | 10/18/2021 3:21:11 PM | WINDOWS-UPCI4ER\Administrator |
| 8      | 191076ti  | 3             | 0               | 10/18/2021 3:25:37 PM | WINDOWS-UPCI4ER\Administrator |
| 9      | w120ti    | 3             | 0               | 10/18/2021 3:29:39 PM | WINDOWS-UPCI4ER\Administrator |
| 10     | 191067ti  | 3             | 0               | 10/18/2021 3:33:39 PM | WINDOWS-UPCI4ER\Administrator |
| 11     | 191090ti  | 3             | 0               | 10/18/2021 3:37:54 PM | WINDOWS-UPCI4ER\Administrator |
| 12     | w132ti    | 3             | 0               | 10/18/2021 3:41:46 PM | WINDOWS-UPCI4ER\Administrator |
| 13     | 191086ti  | 3             | 0               | 10/18/2021 3:45:43 PM | WINDOWS-UPCI4ER\Administrator |
| 14     | w121ti    | 3             | 0               | 10/18/2021 3:49:49 PM | WINDOWS-UPCI4ER\Administrator |
| 15     | w131ti    | 3             | 0               | 10/18/2021 3:53:48 PM | WINDOWS-UPCI4ER\Administrator |
| 16     | w129ti    | 3             | 0               | 10/18/2021 3:57:49 PM | WINDOWS-UPCI4ER\Administrator |
| 17     | w123ti    | 3             | 0               | 10/18/2021 4:01:57 PM | WINDOWS-UPCI4ER\Administrator |
| 18     | 191055ti  | 3             | 0               | 10/18/2021 4:06:10 PM | WINDOWS-UPCI4ER\Administrator |
| 19     | 191064ti  | 3             | 0               | 10/18/2021 4:10:22 PM | WINDOWS-UPCI4ER\Administrator |
| 20     | w117ti    | 3             | 0               | 10/18/2021 4:14:31 PM | WINDOWS-UPCI4ER\Administrator |
| 21     | w128ti    | 3             | 0               | 10/18/2021 4:18:39 PM | WINDOWS-UPCI4ER\Administrator |
| 22     | w125ti    | 3             | 0               | 10/18/2021 4:22:50 PM | WINDOWS-UPCI4ER\Administrator |
| 23     | w118ti    | 3             | 0               | 10/18/2021 4:26:52 PM | WINDOWS-UPCI4ER\Administrator |
| 24     | 191075ti  | 3             | 0               | 10/18/2021 4:31:10 PM | WINDOWS-UPCI4ER\Administrator |
| 25     | 191078ti  | 3             | 0               | 10/18/2021 4:35:18 PM | WINDOWS-UPCI4ER\Administrator |
| 26     | 191071ti  | 3             | 0               | 10/18/2021 4:39:23 PM | WINDOWS-UPCI4ER\Administrator |
| 27     | y100ti    | 3             | 0               | 10/18/2021 4:43:16 PM | WINDOWS-UPCI4ER\Administrator |
| 28     | 191066ti  | 3             | 0               | 10/18/2021 4:47:17 PM | WINDOWS-UPCI4ER\Administrator |
| 29     | 191079ti  | 3             | 0               | 10/18/2021 4:51:09 PM | WINDOWS-UPCI4ER\Administrator |
| 30     | 1806100ti | 3             | 0               | 10/18/2021 4:55:03 PM | WINDOWS-UPCI4ER\Administrator |

## Sample Summary

Instrument ID: iCAP Q

Analysis index: 1

Analysis name: water

Analysis started at: 10/18/2021 2:59:09 PM

User name: WINDOWS-UPCI4ER\Administrator

| Category    | Concentration average | Concentration RSD |
|-------------|-----------------------|-------------------|
| 6Li (KED)   | 0.037 %               | 173.2 %           |
| 11B (KED)   | Infinity ppb          |                   |
| 24Mg (KED)  | Infinity ppb          |                   |
| 27Al (KED)  | 5.047 ppb             | 187.6 %           |
| 45Sc (KED)  | 0.164 %               | 19.0 %            |
| 51V (KED)   | 0.328 ppb             | 90.2 %            |
| 52Cr (KED)  | 0.447 ppb             | 115.0 %           |
| 55Mn (KED)  | 1.071 ppb             | 31.4 %            |
| 56Fe (KED)  | 12.950 ppb            | 32.0 %            |
| 58Ni (KED)  | 4.417 ppb             | 3.4 %             |
| 59Co (KED)  | -0.001 ppb            |                   |
| 63Cu (KED)  | Infinity ppb          |                   |
| 64Zn (KED)  | Infinity ppb          |                   |
| 75As (KED)  | Infinity ppb          |                   |
| 80Se (KED)  | Infinity ppb          |                   |
| 88Sr (KED)  | Infinity ppb          |                   |
| 89Y (KED)   | 0.000 %               |                   |
| 107Ag (KED) | Infinity ppb          |                   |
| 114Cd (KED) | Infinity ppb          |                   |
| 115In (KED) | 0.000 %               | 173.2 %           |
| 138Ba (KED) | Infinity ppb          |                   |
| 159Tb (KED) | 0.000 %               |                   |
| 205Tl (KED) | 1.892 ppb             | 126.9 %           |
| 208Pb (KED) | 31.894 ppb            | 23.6 %            |
| 209Bi (KED) | 0.001 %               | 16.5 %            |
| 232Th (KED) | 0.000 ppb             | 0.0 %             |
| 238U (KED)  | 1.013 ppb             | 104.8 %           |

| Category    | Concentration average | Intensity average | Intensity RSD |
|-------------|-----------------------|-------------------|---------------|
| 6Li (KED)   | 0.037 %               | 1 cps             | 173.2 %       |
| 9Be (KED)   |                       | 0 cps             |               |
| 11B (KED)   | Infinity ppb          | 60 cps            | 30.9 %        |
| 24Mg (KED)  | Infinity ppb          | 20 cps            | 60.1 %        |
| 27Al (KED)  | 5.047 ppb             | 1 cps             | 173.2 %       |
| 45Sc (KED)  | 0.164 %               | 77 cps            | 19.0 %        |
| 51V (KED)   | 0.328 ppb             | 4 cps             | 86.6 %        |
| 52Cr (KED)  | 0.447 ppb             | 9 cps             | 108.3 %       |
| 55Mn (KED)  | 1.071 ppb             | 11 cps            | 17.3 %        |
| 56Fe (KED)  | 12.950 ppb            | 244 cps           | 16.4 %        |
| 58Ni (KED)  | 4.417 ppb             | 112 cps           | 16.9 %        |
| 59Co (KED)  | -0.001 ppb            | 0 cps             |               |
| 63Cu (KED)  | Infinity ppb          | 97 cps            | 29.5 %        |
| 64Zn (KED)  | Infinity ppb          | 416 cps           | 13.0 %        |
| 69Ga (KED)  |                       | 3 cps             | 173.2 %       |
| 75As (KED)  | Infinity ppb          | 13 cps            | 25.0 %        |
| 80Se (KED)  | Infinity ppb          | 992 cps           | 15.9 %        |
| 85Rb (KED)  |                       | 3 cps             | 100.0 %       |
| 88Sr (KED)  | Infinity ppb          | 6 cps             | 69.3 %        |
| 89Y (KED)   | 0.000 %               | 0 cps             |               |
| 107Ag (KED) | Infinity ppb          | 9 cps             | 78.1 %        |

| Category    | Concentration average | Intensity average | Intensity RSD |
|-------------|-----------------------|-------------------|---------------|
| 114Cd (KED) | Infinity ppb          | 7 cps             | 50.0 %        |
| 115In (KED) | 0.000 %               | 1 cps             | 173.2 %       |
| 133Cs (KED) |                       | 1 cps             | 173.2 %       |
| 138Ba (KED) | Infinity ppb          | 57 cps            | 5.9 %         |
| 139La (KED) |                       | 0 cps             |               |
| 140Ce (KED) |                       | 1 cps             | 173.2 %       |
| 141Pr (KED) |                       | 0 cps             |               |
| 142Nd (KED) |                       | 0 cps             |               |
| 152Sm (KED) |                       | 0 cps             |               |
| 153Eu (KED) |                       | 0 cps             |               |
| 158Gd (KED) |                       | 0 cps             |               |
| 159Tb (KED) | 0.000 %               | 0 cps             |               |
| 164Dy (KED) |                       | 0 cps             |               |
| 166Er (KED) |                       | 0 cps             |               |
| 169Tm (KED) |                       | 0 cps             |               |
| 174Yb (KED) |                       | 0 cps             |               |
| 175Lu (KED) |                       | 0 cps             |               |
| 205Tl (KED) | 1.892 ppb             | 6 cps             | 124.9 %       |
| 208Pb (KED) | 31.894 ppb            | 60 cps            | 5.6 %         |
| 209Bi (KED) | 0.001 %               | 53 cps            | 16.5 %        |
| 232Th (KED) | 0.000 ppb             | 0 cps             |               |
| 238U (KED)  | 1.013 ppb             | 4 cps             | 114.6 %       |

## Sample Summary

Instrument ID: iCAP Q

Analysis index: 2

Analysis name: blk

Analysis started at: 10/18/2021 3:02:09 PM

User name: WINDOWS-UPCI4ER\Administrator

| Category    | Concentration average | Concentration RSD |
|-------------|-----------------------|-------------------|
| 6Li (KED)   | 100.000 %             |                   |
| 9Be (KED)   | 0.000 ppb             |                   |
| 11B (KED)   | -0.101 ppb            | 280.4 %           |
| 24Mg (KED)  | -0.028 ppb            | 46.7 %            |
| 27Al (KED)  | -0.027 ppb            | 213.9 %           |
| 45Sc (KED)  | 100.000 %             |                   |
| 51V (KED)   | 0.000 ppb             | 150.3 %           |
| 52Cr (KED)  | -0.001 ppb            | 169.4 %           |
| 55Mn (KED)  | 0.001 ppb             | 245.1 %           |
| 56Fe (KED)  | -0.006 ppb            | 261.0 %           |
| 58Ni (KED)  | -0.004 ppb            | 17.3 %            |
| 59Co (KED)  | 0.000 ppb             | 178.9 %           |
| 63Cu (KED)  | -0.213 ppb            | 30.3 %            |
| 64Zn (KED)  | -0.139 ppb            | 35.8 %            |
| 69Ga (KED)  | 0.000 ppb             | 1,248.5 %         |
| 75As (KED)  | 0.004 ppb             | 160.7 %           |
| 80Se (KED)  | 0.079 ppb             | 139.7 %           |
| 85Rb (KED)  | 0.000 ppb             | 419.2 %           |
| 88Sr (KED)  | 0.001 ppb             | 178.0 %           |
| 89Y (KED)   | 100.000 %             |                   |
| 107Ag (KED) | 0.000 ppb             | 36.2 %            |
| 114Cd (KED) | -0.001 ppb            | 40.6 %            |
| 115In (KED) | 100.000 %             |                   |
| 133Cs (KED) | 0.000 ppb             | 292.9 %           |
| 138Ba (KED) | 0.004 ppb             | 51.4 %            |
| 139La (KED) | 0.000 ppb             | 3,531.8 %         |
| 140Ce (KED) | 0.000 ppb             | 81.6 %            |
| 141Pr (KED) | 0.000 ppb             | 786.9 %           |
| 142Nd (KED) | 0.000 ppb             | 2,059.7 %         |
| 152Sm (KED) | 0.000 ppb             | 624.2 %           |
| 153Eu (KED) | 0.000 ppb             | 13.9 %            |
| 158Gd (KED) | 0.000 ppb             | 0.8 %             |
| 159Tb (KED) | 100.000 %             |                   |
| 164Dy (KED) | 0.000 ppb             | 0.9 %             |
| 166Er (KED) | 0.000 ppb             | 91.6 %            |
| 169Tm (KED) | 0.000 ppb             | 6.8 %             |
| 174Yb (KED) | 0.000 ppb             | 487.7 %           |
| 175Lu (KED) | 0.045 ppb             | 27.4 %            |
| 205Tl (KED) | 0.000 ppb             | 199.9 %           |
| 208Pb (KED) | 0.003 ppb             | 40.8 %            |
| 209Bi (KED) | 100.000 %             |                   |
| 232Th (KED) | 0.000 ppb             | 26.1 %            |
| 238U (KED)  | 0.000 ppb             | 4,441.1 %         |

| Category   | Concentration average | Intensity average | Intensity RSD |
|------------|-----------------------|-------------------|---------------|
| 6Li (KED)  | 100.000 %             | 2,998 cps         | 3.6 %         |
| 9Be (KED)  | 0.000 ppb             | 0 cps             |               |
| 11B (KED)  | -0.101 ppb            | 470 cps           | 8.7 %         |
| 24Mg (KED) | -0.028 ppb            | 84 cps            | 12.1 %        |
| 27Al (KED) | -0.027 ppb            | 53 cps            | 12.5 %        |

| Category    | Concentration average | Intensity average | Intensity RSD |
|-------------|-----------------------|-------------------|---------------|
| 45Sc (KED)  | 100.000 %             | 46,868 cps        | 2.2 %         |
| 51V (KED)   | 0.000 ppb             | 6 cps             | 91.7 %        |
| 52Cr (KED)  | -0.001 ppb            | 74 cps            | 21.2 %        |
| 55Mn (KED)  | 0.001 ppb             | 44 cps            | 26.3 %        |
| 56Fe (KED)  | -0.006 ppb            | 1,883 cps         | 8.8 %         |
| 58Ni (KED)  | -0.004 ppb            | 201 cps           | 4.2 %         |
| 59Co (KED)  | 0.000 ppb             | 27 cps            | 43.3 %        |
| 63Cu (KED)  | -0.213 ppb            | 5,144 cps         | 24.2 %        |
| 64Zn (KED)  | -0.139 ppb            | 2,535 cps         | 11.6 %        |
| 69Ga (KED)  | 0.000 ppb             | 69 cps            | 38.8 %        |
| 75As (KED)  | 0.004 ppb             | 21 cps            | 45.6 %        |
| 80Se (KED)  | 0.079 ppb             | 1,082 cps         | 5.4 %         |
| 85Rb (KED)  | 0.000 ppb             | 10 cps            | 33.3 %        |
| 88Sr (KED)  | 0.001 ppb             | 102 cps           | 8.2 %         |
| 89Y (KED)   | 100.000 %             | 430,137 cps       | 0.7 %         |
| 107Ag (KED) | 0.000 ppb             | 33 cps            | 10.0 %        |
| 114Cd (KED) | -0.001 ppb            | 68 cps            | 12.4 %        |
| 115In (KED) | 100.000 %             | 807,690 cps       | 2.1 %         |
| 133Cs (KED) | 0.000 ppb             | 14 cps            | 48.0 %        |
| 138Ba (KED) | 0.004 ppb             | 1,537 cps         | 6.2 %         |
| 139La (KED) | 0.000 ppb             | 26 cps            | 41.9 %        |
| 140Ce (KED) | 0.000 ppb             | 302 cps           | 13.9 %        |
| 141Pr (KED) | 0.000 ppb             | 27 cps            | 54.5 %        |
| 142Nd (KED) | 0.000 ppb             | 50 cps            | 13.3 %        |
| 152Sm (KED) | 0.000 ppb             | 9 cps             | 57.3 %        |
| 153Eu (KED) | 0.000 ppb             | 12 cps            | 15.7 %        |
| 158Gd (KED) | 0.000 ppb             | 10 cps            | 0.0 %         |
| 159Tb (KED) | 100.000 %             | 4,047,455 cps     | 0.4 %         |
| 164Dy (KED) | 0.000 ppb             | 13 cps            | 0.0 %         |
| 166Er (KED) | 0.000 ppb             | 558 cps           | 2.9 %         |
| 169Tm (KED) | 0.000 ppb             | 9 cps             | 21.7 %        |
| 174Yb (KED) | 0.000 ppb             | 27 cps            | 25.0 %        |
| 175Lu (KED) | 0.045 ppb             | 43,624 cps        | 4.3 %         |
| 205Tl (KED) | 0.000 ppb             | 14 cps            | 58.1 %        |
| 208Pb (KED) | 0.003 ppb             | 7,801 cps         | 3.0 %         |
| 209Bi (KED) | 100.000 %             | 3,693,067 cps     | 1.3 %         |
| 232Th (KED) | 0.000 ppb             | 66 cps            | 16.3 %        |
| 238U (KED)  | 0.000 ppb             | 144 cps           | 18.5 %        |

## Sample Summary

Instrument ID: iCAP Q

Analysis index: 3

Analysis name: 0+20

Analysis started at: 10/18/2021 3:05:48 PM

User name: WINDOWS-UPCI4ER\Administrator

| Category    | Concentration average | Concentration RSD |
|-------------|-----------------------|-------------------|
| 6Li (KED)   | 100.853 %             |                   |
| 9Be (KED)   | 0.000 ppb             |                   |
| 11B (KED)   | 0.000 ppb             | 0.2 %             |
| 24Mg (KED)  | 0.000 ppb             | 0.3 %             |
| 27Al (KED)  | 0.000 ppb             | 0.1 %             |
| 45Sc (KED)  | 103.251 %             |                   |
| 51V (KED)   | 0.000 ppb             | 1.7 %             |
| 52Cr (KED)  | 0.000 ppb             | 0.2 %             |
| 55Mn (KED)  | 0.000 ppb             | 0.5 %             |
| 56Fe (KED)  | 0.000 ppb             | 0.1 %             |
| 58Ni (KED)  | 0.000 ppb             | 0.1 %             |
| 59Co (KED)  | 0.000 ppb             | 0.1 %             |
| 63Cu (KED)  | 0.000 ppb             | 0.2 %             |
| 64Zn (KED)  | 0.000 ppb             | 0.1 %             |
| 69Ga (KED)  | 0.000 ppb             | 0.3 %             |
| 75As (KED)  | 0.000 ppb             | 0.7 %             |
| 80Se (KED)  | 0.000 ppb             | 0.1 %             |
| 85Rb (KED)  | 0.000 ppb             | 0.5 %             |
| 88Sr (KED)  | 0.000 ppb             | 0.1 %             |
| 89Y (KED)   | 103.345 %             |                   |
| 107Ag (KED) | 0.000 ppb             | 0.1 %             |
| 114Cd (KED) | 0.000 ppb             | 0.1 %             |
| 115In (KED) | 101.306 %             |                   |
| 133Cs (KED) | 0.000 ppb             | 0.2 %             |
| 138Ba (KED) | 0.000 ppb             | 0.2 %             |
| 139La (KED) | 0.000 ppb             | 0.3 %             |
| 140Ce (KED) | 0.000 ppb             | 0.1 %             |
| 141Pr (KED) | 0.000 ppb             | 0.3 %             |
| 142Nd (KED) | 0.000 ppb             | 0.3 %             |
| 152Sm (KED) | 0.000 ppb             | 0.6 %             |
| 153Eu (KED) | 0.000 ppb             | 0.2 %             |
| 158Gd (KED) | 0.000 ppb             | 0.7 %             |
| 159Tb (KED) | 102.801 %             |                   |
| 164Dy (KED) | 0.000 ppb             | 0.6 %             |
| 166Er (KED) | 0.000 ppb             | 0.1 %             |
| 169Tm (KED) | 0.000 ppb             | 0.3 %             |
| 174Yb (KED) | 0.000 ppb             | 0.6 %             |
| 175Lu (KED) | 0.000 ppb             | 0.0 %             |
| 205Tl (KED) | 0.000 ppb             | 0.6 %             |
| 208Pb (KED) | 0.000 ppb             | 0.0 %             |
| 209Bi (KED) | 100.950 %             |                   |
| 232Th (KED) | 0.000 ppb             | 0.3 %             |
| 238U (KED)  | 0.000 ppb             | 0.2 %             |

| Category   | Concentration average | Intensity average | Intensity RSD |
|------------|-----------------------|-------------------|---------------|
| 6Li (KED)  | 100.853 %             | 3,024 cps         | 3.0 %         |
| 9Be (KED)  | 0.000 ppb             | 0 cps             |               |
| 11B (KED)  | 0.000 ppb             | 481 cps           | 15.0 %        |
| 24Mg (KED) | 0.000 ppb             | 101 cps           | 26.9 %        |
| 27Al (KED) | 0.000 ppb             | 59 cps            | 6.5 %         |

| Category    | Concentration average | Intensity average | Intensity RSD |
|-------------|-----------------------|-------------------|---------------|
| 45Sc (KED)  | 103.251 %             | 48,391 cps        | 1.5 %         |
| 51V (KED)   | 0.000 ppb             | 2 cps             | 173.2 %       |
| 52Cr (KED)  | 0.000 ppb             | 86 cps            | 21.5 %        |
| 55Mn (KED)  | 0.000 ppb             | 41 cps            | 46.1 %        |
| 56Fe (KED)  | 0.000 ppb             | 2,027 cps         | 11.8 %        |
| 58Ni (KED)  | 0.000 ppb             | 276 cps           | 9.4 %         |
| 59Co (KED)  | 0.000 ppb             | 21 cps            | 9.1 %         |
| 63Cu (KED)  | 0.000 ppb             | 9,569 cps         | 24.0 %        |
| 64Zn (KED)  | 0.000 ppb             | 3,472 cps         | 11.7 %        |
| 69Ga (KED)  | 0.000 ppb             | 69 cps            | 29.6 %        |
| 75As (KED)  | 0.000 ppb             | 16 cps            | 68.9 %        |
| 80Se (KED)  | 0.000 ppb             | 1,073 cps         | 8.3 %         |
| 85Rb (KED)  | 0.000 ppb             | 11 cps            | 45.8 %        |
| 88Sr (KED)  | 0.000 ppb             | 101 cps           | 12.5 %        |
| 89Y (KED)   | 103.345 %             | 444,524 cps       | 0.8 %         |
| 107Ag (KED) | 0.000 ppb             | 43 cps            | 7.7 %         |
| 114Cd (KED) | 0.000 ppb             | 87 cps            | 13.9 %        |
| 115In (KED) | 101.306 %             | 818,241 cps       | 0.9 %         |
| 133Cs (KED) | 0.000 ppb             | 12 cps            | 15.7 %        |
| 138Ba (KED) | 0.000 ppb             | 1,400 cps         | 17.2 %        |
| 139La (KED) | 0.000 ppb             | 27 cps            | 33.1 %        |
| 140Ce (KED) | 0.000 ppb             | 362 cps           | 12.2 %        |
| 141Pr (KED) | 0.000 ppb             | 26 cps            | 30.1 %        |
| 142Nd (KED) | 0.000 ppb             | 51 cps            | 30.8 %        |
| 152Sm (KED) | 0.000 ppb             | 10 cps            | 57.7 %        |
| 153Eu (KED) | 0.000 ppb             | 27 cps            | 25.0 %        |
| 158Gd (KED) | 0.000 ppb             | 16 cps            | 68.9 %        |
| 159Tb (KED) | 102.801 %             | 4,160,817 cps     | 0.9 %         |
| 164Dy (KED) | 0.000 ppb             | 20 cps            | 57.7 %        |
| 166Er (KED) | 0.000 ppb             | 553 cps           | 11.5 %        |
| 169Tm (KED) | 0.000 ppb             | 38 cps            | 27.0 %        |
| 174Yb (KED) | 0.000 ppb             | 29 cps            | 63.5 %        |
| 175Lu (KED) | 0.000 ppb             | 37,519 cps        | 2.4 %         |
| 205Tl (KED) | 0.000 ppb             | 19 cps            | 56.7 %        |
| 208Pb (KED) | 0.000 ppb             | 7,482 cps         | 5.0 %         |
| 209Bi (KED) | 100.950 %             | 3,728,140 cps     | 1.1 %         |
| 232Th (KED) | 0.000 ppb             | 108 cps           | 34.5 %        |
| 238U (KED)  | 0.000 ppb             | 147 cps           | 23.6 %        |

## Sample Summary

Instrument ID: iCAP Q

Analysis index: 4

Analysis name: 20+20

Analysis started at: 10/18/2021 3:09:14 PM

User name: WINDOWS-UPCI4ER\Administrator

| Category    | Concentration average | Concentration RSD |
|-------------|-----------------------|-------------------|
| 6Li (KED)   | 100.927 %             |                   |
| 9Be (KED)   | 19.547 ppb            | 4.2 %             |
| 11B (KED)   | 17.992 ppb            | 3.7 %             |
| 24Mg (KED)  | 19.519 ppb            | 3.0 %             |
| 27Al (KED)  | 20.492 ppb            | 1.8 %             |
| 45Sc (KED)  | 105.928 %             |                   |
| 51V (KED)   | 19.631 ppb            | 1.4 %             |
| 52Cr (KED)  | 19.962 ppb            | 1.4 %             |
| 55Mn (KED)  | 20.053 ppb            | 0.2 %             |
| 56Fe (KED)  | 20.096 ppb            | 0.4 %             |
| 58Ni (KED)  | 20.445 ppb            | 0.6 %             |
| 59Co (KED)  | 20.428 ppb            | 0.9 %             |
| 63Cu (KED)  | 20.226 ppb            | 1.1 %             |
| 64Zn (KED)  | 19.944 ppb            | 1.3 %             |
| 69Ga (KED)  | 20.073 ppb            | 1.5 %             |
| 75As (KED)  | 20.066 ppb            | 2.3 %             |
| 80Se (KED)  | 20.221 ppb            | 3.8 %             |
| 85Rb (KED)  | 19.642 ppb            | 3.0 %             |
| 88Sr (KED)  | 19.737 ppb            | 0.7 %             |
| 89Y (KED)   | 105.847 %             |                   |
| 107Ag (KED) | 20.325 ppb            | 1.4 %             |
| 114Cd (KED) | 20.077 ppb            | 2.2 %             |
| 115In (KED) | 104.235 %             |                   |
| 133Cs (KED) | 20.087 ppb            | 1.7 %             |
| 138Ba (KED) | 20.076 ppb            | 0.4 %             |
| 139La (KED) | 19.438 ppb            | 1.0 %             |
| 140Ce (KED) | 19.191 ppb            | 0.4 %             |
| 141Pr (KED) | 19.270 ppb            | 0.7 %             |
| 142Nd (KED) | 19.613 ppb            | 1.3 %             |
| 152Sm (KED) | 19.327 ppb            | 1.6 %             |
| 153Eu (KED) | 19.529 ppb            | 1.1 %             |
| 158Gd (KED) | 19.756 ppb            | 1.2 %             |
| 159Tb (KED) | 104.526 %             |                   |
| 164Dy (KED) | 19.380 ppb            | 1.6 %             |
| 166Er (KED) | 19.553 ppb            | 0.4 %             |
| 169Tm (KED) | 20.071 ppb            | 1.0 %             |
| 174Yb (KED) | 19.456 ppb            | 1.0 %             |
| 175Lu (KED) | 18.984 ppb            | 2.2 %             |
| 205Tl (KED) | 18.710 ppb            | 0.9 %             |
| 208Pb (KED) | 18.932 ppb            | 1.2 %             |
| 209Bi (KED) | 103.295 %             |                   |
| 232Th (KED) | 18.642 ppb            | 2.1 %             |
| 238U (KED)  | 19.238 ppb            | 0.8 %             |

| Category   | Concentration average | Intensity average | Intensity RSD |
|------------|-----------------------|-------------------|---------------|
| 6Li (KED)  | 100.927 %             | 3,026 cps         | 3.6 %         |
| 9Be (KED)  | 19.547 ppb            | 3,322 cps         | 0.7 %         |
| 11B (KED)  | 17.992 ppb            | 2,126 cps         | 5.3 %         |
| 24Mg (KED) | 19.519 ppb            | 11,020 cps        | 1.3 %         |
| 27Al (KED) | 20.492 ppb            | 3,015 cps         | 2.5 %         |

| Category    | Concentration average | Intensity average | Intensity RSD |
|-------------|-----------------------|-------------------|---------------|
| 45Sc (KED)  | 105.928 %             | 49,646 cps        | 1.1 %         |
| 51V (KED)   | 19.631 ppb            | 169,591 cps       | 0.9 %         |
| 52Cr (KED)  | 19.962 ppb            | 270,746 cps       | 0.9 %         |
| 55Mn (KED)  | 20.053 ppb            | 138,672 cps       | 1.2 %         |
| 56Fe (KED)  | 20.096 ppb            | 254,197 cps       | 1.0 %         |
| 58Ni (KED)  | 20.445 ppb            | 336,174 cps       | 1.2 %         |
| 59Co (KED)  | 20.428 ppb            | 544,112 cps       | 1.4 %         |
| 63Cu (KED)  | 20.226 ppb            | 422,543 cps       | 0.6 %         |
| 64Zn (KED)  | 19.944 ppb            | 128,792 cps       | 0.7 %         |
| 69Ga (KED)  | 20.073 ppb            | 134,720 cps       | 1.0 %         |
| 75As (KED)  | 20.066 ppb            | 34,297 cps        | 1.8 %         |
| 80Se (KED)  | 20.221 ppb            | 12,838 cps        | 3.3 %         |
| 85Rb (KED)  | 19.642 ppb            | 122,587 cps       | 2.4 %         |
| 88Sr (KED)  | 19.737 ppb            | 173,405 cps       | 1.1 %         |
| 89Y (KED)   | 105.847 %             | 455,287 cps       | 0.6 %         |
| 107Ag (KED) | 20.325 ppb            | 1,142,727 cps     | 0.8 %         |
| 114Cd (KED) | 20.077 ppb            | 440,170 cps       | 1.8 %         |
| 115In (KED) | 104.235 %             | 841,892 cps       | 0.6 %         |
| 133Cs (KED) | 20.087 ppb            | 619,241 cps       | 1.1 %         |
| 138Ba (KED) | 20.076 ppb            | 829,581 cps       | 0.1 %         |
| 139La (KED) | 19.438 ppb            | 1,734,790 cps     | 0.6 %         |
| 140Ce (KED) | 19.191 ppb            | 2,297,711 cps     | 0.2 %         |
| 141Pr (KED) | 19.270 ppb            | 2,414,115 cps     | 0.4 %         |
| 142Nd (KED) | 19.613 ppb            | 977,676 cps       | 1.1 %         |
| 152Sm (KED) | 19.327 ppb            | 871,816 cps       | 1.5 %         |
| 153Eu (KED) | 19.529 ppb            | 1,760,440 cps     | 0.7 %         |
| 158Gd (KED) | 19.756 ppb            | 1,184,477 cps     | 0.9 %         |
| 159Tb (KED) | 104.526 %             | 4,230,651 cps     | 0.4 %         |
| 164Dy (KED) | 19.380 ppb            | 1,313,601 cps     | 1.1 %         |
| 166Er (KED) | 19.553 ppb            | 1,565,438 cps     | 0.2 %         |
| 169Tm (KED) | 20.071 ppb            | 5,460,369 cps     | 0.9 %         |
| 174Yb (KED) | 19.456 ppb            | 1,873,167 cps     | 1.4 %         |
| 175Lu (KED) | 18.984 ppb            | 3,169,487 cps     | 1.8 %         |
| 205Tl (KED) | 18.710 ppb            | 3,656,899 cps     | 1.4 %         |
| 208Pb (KED) | 18.932 ppb            | 2,618,521 cps     | 1.7 %         |
| 209Bi (KED) | 103.295 %             | 3,814,761 cps     | 0.6 %         |
| 232Th (KED) | 18.642 ppb            | 5,098,926 cps     | 2.6 %         |
| 238U (KED)  | 19.238 ppb            | 6,118,798 cps     | 1.2 %         |

## Sample Summary

Instrument ID: iCAP Q

Analysis index: 5

Analysis name: 50+20

Analysis started at: 10/18/2021 3:13:08 PM

User name: WINDOWS-UPCI4ER\Administrator

| Category    | Concentration average | Concentration RSD |
|-------------|-----------------------|-------------------|
| 6Li (KED)   | 103.596 %             |                   |
| 9Be (KED)   | 49.284 ppb            | 7.1 %             |
| 11B (KED)   | 48.006 ppb            | 7.5 %             |
| 24Mg (KED)  | 48.620 ppb            | 5.4 %             |
| 27Al (KED)  | 49.097 ppb            | 2.4 %             |
| 45Sc (KED)  | 107.963 %             |                   |
| 51V (KED)   | 49.794 ppb            | 2.3 %             |
| 52Cr (KED)  | 50.468 ppb            | 1.7 %             |
| 55Mn (KED)  | 50.131 ppb            | 1.5 %             |
| 56Fe (KED)  | 50.166 ppb            | 1.4 %             |
| 58Ni (KED)  | 51.060 ppb            | 1.5 %             |
| 59Co (KED)  | 51.309 ppb            | 1.4 %             |
| 63Cu (KED)  | 52.159 ppb            | 0.9 %             |
| 64Zn (KED)  | 51.545 ppb            | 0.6 %             |
| 69Ga (KED)  | 51.287 ppb            | 0.6 %             |
| 75As (KED)  | 51.733 ppb            | 1.6 %             |
| 80Se (KED)  | 52.362 ppb            | 1.5 %             |
| 85Rb (KED)  | 50.329 ppb            | 2.1 %             |
| 88Sr (KED)  | 50.475 ppb            | 0.5 %             |
| 89Y (KED)   | 105.636 %             |                   |
| 107Ag (KED) | 50.127 ppb            | 0.3 %             |
| 114Cd (KED) | 49.816 ppb            | 1.2 %             |
| 115In (KED) | 106.758 %             |                   |
| 133Cs (KED) | 49.693 ppb            | 0.6 %             |
| 138Ba (KED) | 50.850 ppb            | 2.4 %             |
| 139La (KED) | 49.713 ppb            | 1.1 %             |
| 140Ce (KED) | 50.971 ppb            | 1.9 %             |
| 141Pr (KED) | 51.315 ppb            | 2.2 %             |
| 142Nd (KED) | 49.744 ppb            | 2.3 %             |
| 152Sm (KED) | 49.501 ppb            | 1.2 %             |
| 153Eu (KED) | 49.788 ppb            | 3.4 %             |
| 158Gd (KED) | 49.404 ppb            | 2.1 %             |
| 159Tb (KED) | 104.831 %             |                   |
| 164Dy (KED) | 48.490 ppb            | 0.4 %             |
| 166Er (KED) | 48.397 ppb            | 0.9 %             |
| 169Tm (KED) | 51.196 ppb            | 2.5 %             |
| 174Yb (KED) | 51.263 ppb            | 1.1 %             |
| 175Lu (KED) | 50.975 ppb            | 1.2 %             |
| 205Tl (KED) | 49.482 ppb            | 3.7 %             |
| 208Pb (KED) | 49.588 ppb            | 2.0 %             |
| 209Bi (KED) | 102.680 %             |                   |
| 232Th (KED) | 48.788 ppb            | 2.1 %             |
| 238U (KED)  | 49.112 ppb            | 1.7 %             |

| Category   | Concentration average | Intensity average | Intensity RSD |
|------------|-----------------------|-------------------|---------------|
| 6Li (KED)  | 103.596 %             | 3,106 cps         | 6.0 %         |
| 9Be (KED)  | 49.284 ppb            | 8,581 cps         | 1.9 %         |
| 11B (KED)  | 48.006 ppb            | 4,980 cps         | 1.0 %         |
| 24Mg (KED) | 48.620 ppb            | 27,982 cps        | 0.9 %         |
| 27Al (KED) | 49.097 ppb            | 7,274 cps         | 1.9 %         |

| Category    | Concentration average | Intensity average | Intensity RSD |
|-------------|-----------------------|-------------------|---------------|
| 45Sc (KED)  | 107.963 %             | 50,600 cps        | 1.5 %         |
| 51V (KED)   | 49.794 ppb            | 438,388 cps       | 1.2 %         |
| 52Cr (KED)  | 50.468 ppb            | 697,448 cps       | 0.4 %         |
| 55Mn (KED)  | 50.131 ppb            | 353,218 cps       | 0.3 %         |
| 56Fe (KED)  | 50.166 ppb            | 643,486 cps       | 0.4 %         |
| 58Ni (KED)  | 51.060 ppb            | 855,260 cps       | 2.1 %         |
| 59Co (KED)  | 51.309 ppb            | 1,392,693 cps     | 0.4 %         |
| 63Cu (KED)  | 52.159 ppb            | 1,072,089 cps     | 0.6 %         |
| 64Zn (KED)  | 51.545 ppb            | 326,583 cps       | 0.6 %         |
| 69Ga (KED)  | 51.287 ppb            | 343,427 cps       | 0.5 %         |
| 75As (KED)  | 51.733 ppb            | 88,223 cps        | 1.2 %         |
| 80Se (KED)  | 52.362 ppb            | 31,433 cps        | 1.2 %         |
| 85Rb (KED)  | 50.329 ppb            | 313,481 cps       | 1.8 %         |
| 88Sr (KED)  | 50.475 ppb            | 442,395 cps       | 0.2 %         |
| 89Y (KED)   | 105.636 %             | 454,379 cps       | 0.4 %         |
| 107Ag (KED) | 50.127 ppb            | 2,886,544 cps     | 0.7 %         |
| 114Cd (KED) | 49.816 ppb            | 1,118,573 cps     | 1.7 %         |
| 115In (KED) | 106.758 %             | 862,276 cps       | 0.5 %         |
| 133Cs (KED) | 49.693 ppb            | 1,569,157 cps     | 1.1 %         |
| 138Ba (KED) | 50.850 ppb            | 2,104,905 cps     | 1.6 %         |
| 139La (KED) | 49.713 ppb            | 4,449,656 cps     | 0.8 %         |
| 140Ce (KED) | 50.971 ppb            | 6,119,511 cps     | 1.7 %         |
| 141Pr (KED) | 51.315 ppb            | 6,446,795 cps     | 1.8 %         |
| 142Nd (KED) | 49.744 ppb            | 2,486,567 cps     | 1.7 %         |
| 152Sm (KED) | 49.501 ppb            | 2,239,383 cps     | 1.0 %         |
| 153Eu (KED) | 49.788 ppb            | 4,500,835 cps     | 3.0 %         |
| 158Gd (KED) | 49.404 ppb            | 2,970,279 cps     | 1.2 %         |
| 159Tb (KED) | 104.831 %             | 4,242,992 cps     | 1.0 %         |
| 164Dy (KED) | 48.490 ppb            | 3,296,280 cps     | 0.7 %         |
| 166Er (KED) | 48.397 ppb            | 3,885,389 cps     | 1.8 %         |
| 169Tm (KED) | 51.196 ppb            | 13,966,869 cps    | 1.8 %         |
| 174Yb (KED) | 51.263 ppb            | 4,949,377 cps     | 1.0 %         |
| 175Lu (KED) | 50.975 ppb            | 8,471,971 cps     | 2.0 %         |
| 205Tl (KED) | 49.482 ppb            | 9,608,542 cps     | 1.8 %         |
| 208Pb (KED) | 49.588 ppb            | 6,803,913 cps     | 1.9 %         |
| 209Bi (KED) | 102.680 %             | 3,792,032 cps     | 2.1 %         |
| 232Th (KED) | 48.788 ppb            | 13,259,543 cps    | 0.8 %         |
| 238U (KED)  | 49.112 ppb            | 15,523,762 cps    | 0.7 %         |

## Sample Summary

Instrument ID: iCAP Q

Analysis index: 6

Analysis name: 100+20

Analysis started at: 10/18/2021 3:17:24 PM

User name: WINDOWS-UPCI4ER\Administrator

| Category    | Concentration average | Concentration RSD |
|-------------|-----------------------|-------------------|
| 6Li (KED)   | 102.150 %             |                   |
| 9Be (KED)   | 100.448 ppb           | 0.5 %             |
| 11B (KED)   | 101.399 ppb           | 0.2 %             |
| 24Mg (KED)  | 100.786 ppb           | 2.1 %             |
| 27Al (KED)  | 100.353 ppb           | 1.9 %             |
| 45Sc (KED)  | 111.998 %             |                   |
| 51V (KED)   | 100.177 ppb           | 0.7 %             |
| 52Cr (KED)  | 99.774 ppb            | 0.4 %             |
| 55Mn (KED)  | 99.924 ppb            | 1.1 %             |
| 56Fe (KED)  | 99.898 ppb            | 1.4 %             |
| 58Ni (KED)  | 99.381 ppb            | 1.3 %             |
| 59Co (KED)  | 99.260 ppb            | 1.0 %             |
| 63Cu (KED)  | 98.875 ppb            | 1.1 %             |
| 64Zn (KED)  | 99.239 ppb            | 1.2 %             |
| 69Ga (KED)  | 99.342 ppb            | 1.1 %             |
| 75As (KED)  | 99.120 ppb            | 1.8 %             |
| 80Se (KED)  | 98.775 ppb            | 1.5 %             |
| 85Rb (KED)  | 99.907 ppb            | 1.8 %             |
| 88Sr (KED)  | 99.815 ppb            | 0.2 %             |
| 89Y (KED)   | 112.025 %             |                   |
| 107Ag (KED) | 99.872 ppb            | 0.9 %             |
| 114Cd (KED) | 100.076 ppb           | 1.9 %             |
| 115In (KED) | 109.708 %             |                   |
| 133Cs (KED) | 100.136 ppb           | 2.0 %             |
| 138Ba (KED) | 99.560 ppb            | 2.4 %             |
| 139La (KED) | 100.256 ppb           | 2.1 %             |
| 140Ce (KED) | 99.676 ppb            | 1.9 %             |
| 141Pr (KED) | 99.489 ppb            | 1.6 %             |
| 142Nd (KED) | 100.205 ppb           | 1.8 %             |
| 152Sm (KED) | 100.384 ppb           | 2.0 %             |
| 153Eu (KED) | 100.200 ppb           | 2.7 %             |
| 158Gd (KED) | 100.347 ppb           | 3.1 %             |
| 159Tb (KED) | 111.609 %             |                   |
| 164Dy (KED) | 100.879 ppb           | 2.3 %             |
| 166Er (KED) | 100.891 ppb           | 2.3 %             |
| 169Tm (KED) | 99.388 ppb            | 2.9 %             |
| 174Yb (KED) | 99.477 ppb            | 2.6 %             |
| 175Lu (KED) | 99.716 ppb            | 2.2 %             |
| 205Tl (KED) | 100.517 ppb           | 0.4 %             |
| 208Pb (KED) | 100.420 ppb           | 2.4 %             |
| 209Bi (KED) | 105.356 %             |                   |
| 232Th (KED) | 100.878 ppb           | 0.7 %             |
| 238U (KED)  | 100.597 ppb           | 0.8 %             |

| Category   | Concentration average | Intensity average | Intensity RSD |
|------------|-----------------------|-------------------|---------------|
| 6Li (KED)  | 102.150 %             | 3,063 cps         | 1.4 %         |
| 9Be (KED)  | 100.448 ppb           | 17,292 cps        | 1.1 %         |
| 11B (KED)  | 101.399 ppb           | 9,856 cps         | 1.3 %         |
| 24Mg (KED) | 100.786 ppb           | 57,201 cps        | 1.5 %         |
| 27Al (KED) | 100.353 ppb           | 15,358 cps        | 1.3 %         |

| Category    | Concentration average | Intensity average | Intensity RSD |
|-------------|-----------------------|-------------------|---------------|
| 45Sc (KED)  | 111.998 %             | 52,491 cps        | 1.0 %         |
| 51V (KED)   | 100.177 ppb           | 915,097 cps       | 1.3 %         |
| 52Cr (KED)  | 99.774 ppb            | 1,430,555 cps     | 1.3 %         |
| 55Mn (KED)  | 99.924 ppb            | 730,421 cps       | 1.4 %         |
| 56Fe (KED)  | 99.898 ppb            | 1,327,183 cps     | 0.7 %         |
| 58Ni (KED)  | 99.381 ppb            | 1,726,461 cps     | 0.8 %         |
| 59Co (KED)  | 99.260 ppb            | 2,795,094 cps     | 0.7 %         |
| 63Cu (KED)  | 98.875 ppb            | 2,145,792 cps     | 1.0 %         |
| 64Zn (KED)  | 99.239 ppb            | 663,236 cps       | 0.5 %         |
| 69Ga (KED)  | 99.342 ppb            | 705,309 cps       | 0.9 %         |
| 75As (KED)  | 99.120 ppb            | 179,233 cps       | 1.7 %         |
| 80Se (KED)  | 98.775 ppb            | 61,842 cps        | 0.2 %         |
| 85Rb (KED)  | 99.907 ppb            | 659,845 cps       | 0.9 %         |
| 88Sr (KED)  | 99.815 ppb            | 927,655 cps       | 1.5 %         |
| 89Y (KED)   | 112.025 %             | 481,861 cps       | 1.6 %         |
| 107Ag (KED) | 99.872 ppb            | 5,909,746 cps     | 0.5 %         |
| 114Cd (KED) | 100.076 ppb           | 2,308,957 cps     | 1.7 %         |
| 115In (KED) | 109.708 %             | 886,097 cps       | 0.5 %         |
| 133Cs (KED) | 100.136 ppb           | 3,249,219 cps     | 2.0 %         |
| 138Ba (KED) | 99.560 ppb            | 4,386,433 cps     | 3.1 %         |
| 139La (KED) | 100.256 ppb           | 9,550,765 cps     | 0.4 %         |
| 140Ce (KED) | 99.676 ppb            | 12,737,395 cps    | 0.8 %         |
| 141Pr (KED) | 99.489 ppb            | 13,304,637 cps    | 0.9 %         |
| 142Nd (KED) | 100.205 ppb           | 5,331,869 cps     | 0.9 %         |
| 152Sm (KED) | 100.384 ppb           | 4,833,637 cps     | 0.7 %         |
| 153Eu (KED) | 100.200 ppb           | 9,640,460 cps     | 0.3 %         |
| 158Gd (KED) | 100.347 ppb           | 6,421,506 cps     | 2.1 %         |
| 159Tb (KED) | 111.609 %             | 4,517,316 cps     | 2.5 %         |
| 164Dy (KED) | 100.879 ppb           | 7,298,726 cps     | 1.3 %         |
| 166Er (KED) | 100.891 ppb           | 8,619,430 cps     | 1.1 %         |
| 169Tm (KED) | 99.388 ppb            | 28,858,030 cps    | 1.2 %         |
| 174Yb (KED) | 99.477 ppb            | 10,221,664 cps    | 0.9 %         |
| 175Lu (KED) | 99.716 ppb            | 17,599,222 cps    | 1.7 %         |
| 205Tl (KED) | 100.517 ppb           | 20,036,675 cps    | 1.5 %         |
| 208Pb (KED) | 100.420 ppb           | 14,128,160 cps    | 0.8 %         |
| 209Bi (KED) | 105.356 %             | 3,890,857 cps     | 1.6 %         |
| 232Th (KED) | 100.878 ppb           | 28,136,670 cps    | 0.9 %         |
| 238U (KED)  | 100.597 ppb           | 32,631,002 cps    | 1.1 %         |

## Sample Summary

Instrument ID: iCAP Q

Analysis index: 7

Analysis name: w127ti

Analysis started at: 10/18/2021 3:21:11 PM

User name: WINDOWS-UPCI4ER\Administrator

| Category    | Concentration average | Concentration RSD |
|-------------|-----------------------|-------------------|
| 6Li (KED)   | 99.147 %              | 4.8 %             |
| 9Be (KED)   | 0.040 ppb             | 52.3 %            |
| 11B (KED)   | 3.136 ppb             | 16.6 %            |
| 24Mg (KED)  | 116.767 ppb           | 5.4 %             |
| 27Al (KED)  | 81.884 ppb            | 1.0 %             |
| 45Sc (KED)  | 102.906 %             | 1.2 %             |
| 51V (KED)   | 0.160 ppb             | 15.0 %            |
| 52Cr (KED)  | 0.469 ppb             | 2.7 %             |
| 55Mn (KED)  | 3.062 ppb             | 0.5 %             |
| 56Fe (KED)  | 113.397 ppb           | 1.8 %             |
| 58Ni (KED)  | 0.811 ppb             | 2.0 %             |
| 59Co (KED)  | 0.079 ppb             | 10.7 %            |
| 63Cu (KED)  | 1.911 ppb             | 0.8 %             |
| 64Zn (KED)  | 47.457 ppb            | 0.9 %             |
| 69Ga (KED)  | 0.409 ppb             | 4.3 %             |
| 75As (KED)  | 0.067 ppb             | 17.9 %            |
| 80Se (KED)  | 0.337 ppb             | 66.0 %            |
| 85Rb (KED)  | 0.537 ppb             | 5.1 %             |
| 88Sr (KED)  | 2.679 ppb             | 5.1 %             |
| 89Y (KED)   | 105.298 %             | 0.6 %             |
| 107Ag (KED) | 0.074 ppb             | 7.1 %             |
| 114Cd (KED) | 0.013 ppb             | 17.8 %            |
| 115In (KED) | 103.259 %             | 0.5 %             |
| 133Cs (KED) | 0.019 ppb             | 11.6 %            |
| 138Ba (KED) | 1.474 ppb             | 0.4 %             |
| 139La (KED) | 0.082 ppb             | 2.2 %             |
| 140Ce (KED) | 0.172 ppb             | 3.4 %             |
| 141Pr (KED) | 0.022 ppb             | 12.1 %            |
| 142Nd (KED) | 0.109 ppb             | 4.8 %             |
| 152Sm (KED) | 0.020 ppb             | 41.2 %            |
| 153Eu (KED) | 0.131 ppb             | 168.7 %           |
| 158Gd (KED) | 0.197 ppb             | 162.1 %           |
| 159Tb (KED) | 107.577 %             | 1.6 %             |
| 164Dy (KED) | 0.156 ppb             | 161.9 %           |
| 166Er (KED) | 0.114 ppb             | 169.3 %           |
| 169Tm (KED) | 0.086 ppb             | 171.1 %           |
| 174Yb (KED) | 0.076 ppb             | 162.5 %           |
| 175Lu (KED) | -0.018 ppb            | 691.0 %           |
| 205Tl (KED) | 0.064 ppb             | 158.7 %           |
| 208Pb (KED) | 0.295 ppb             | 24.3 %            |
| 209Bi (KED) | 101.561 %             | 0.5 %             |
| 232Th (KED) | 0.137 ppb             | 75.6 %            |
| 238U (KED)  | 0.038 ppb             | 137.7 %           |

| Category   | Concentration average | Intensity average | Intensity RSD |
|------------|-----------------------|-------------------|---------------|
| 6Li (KED)  | 99.147 %              | 2,973 cps         | 4.8 %         |
| 9Be (KED)  | 0.040 ppb             | 7 cps             | 50.0 %        |
| 11B (KED)  | 3.136 ppb             | 754 cps           | 3.4 %         |
| 24Mg (KED) | 116.767 ppb           | 64,205 cps        | 0.7 %         |
| 27Al (KED) | 81.884 ppb            | 11,525 cps        | 0.3 %         |

| Category    | Concentration average | Intensity average | Intensity RSD |
|-------------|-----------------------|-------------------|---------------|
| 45Sc (KED)  | 102.906 %             | 48,230 cps        | 1.2 %         |
| 51V (KED)   | 0.160 ppb             | 1,347 cps         | 16.1 %        |
| 52Cr (KED)  | 0.469 ppb             | 6,268 cps         | 3.7 %         |
| 55Mn (KED)  | 3.062 ppb             | 20,603 cps        | 0.8 %         |
| 56Fe (KED)  | 113.397 ppb           | 1,383,959 cps     | 1.5 %         |
| 58Ni (KED)  | 0.811 ppb             | 13,211 cps        | 1.6 %         |
| 59Co (KED)  | 0.079 ppb             | 2,061 cps         | 11.8 %        |
| 63Cu (KED)  | 1.911 ppb             | 48,544 cps        | 0.6 %         |
| 64Zn (KED)  | 47.457 ppb            | 299,997 cps       | 0.7 %         |
| 69Ga (KED)  | 0.409 ppb             | 2,801 cps         | 4.1 %         |
| 75As (KED)  | 0.067 ppb             | 129 cps           | 15.2 %        |
| 80Se (KED)  | 0.337 ppb             | 1,289 cps         | 9.9 %         |
| 85Rb (KED)  | 0.537 ppb             | 3,347 cps         | 4.5 %         |
| 88Sr (KED)  | 2.679 ppb             | 23,500 cps        | 5.1 %         |
| 89Y (KED)   | 105.298 %             | 452,925 cps       | 0.6 %         |
| 107Ag (KED) | 0.074 ppb             | 4,165 cps         | 7.1 %         |
| 114Cd (KED) | 0.013 ppb             | 371 cps           | 14.1 %        |
| 115In (KED) | 103.259 %             | 834,016 cps       | 0.5 %         |
| 133Cs (KED) | 0.019 ppb             | 608 cps           | 11.7 %        |
| 138Ba (KED) | 1.474 ppb             | 64,035 cps        | 1.3 %         |
| 139La (KED) | 0.082 ppb             | 7,546 cps         | 0.8 %         |
| 140Ce (KED) | 0.172 ppb             | 21,534 cps        | 2.1 %         |
| 141Pr (KED) | 0.022 ppb             | 2,849 cps         | 11.1 %        |
| 142Nd (KED) | 0.109 ppb             | 5,665 cps         | 3.4 %         |
| 152Sm (KED) | 0.020 ppb             | 945 cps           | 39.7 %        |
| 153Eu (KED) | 0.131 ppb             | 12,021 cps        | 168.2 %       |
| 158Gd (KED) | 0.197 ppb             | 12,031 cps        | 161.7 %       |
| 159Tb (KED) | 107.577 %             | 4,354,122 cps     | 1.6 %         |
| 164Dy (KED) | 0.156 ppb             | 10,784 cps        | 161.4 %       |
| 166Er (KED) | 0.114 ppb             | 9,838 cps         | 159.2 %       |
| 169Tm (KED) | 0.086 ppb             | 23,981 cps        | 170.8 %       |
| 174Yb (KED) | 0.076 ppb             | 7,437 cps         | 161.7 %       |
| 175Lu (KED) | -0.018 ppb            | 35,988 cps        | 59.0 %        |
| 205Tl (KED) | 0.064 ppb             | 12,364 cps        | 158.6 %       |
| 208Pb (KED) | 0.295 ppb             | 47,503 cps        | 20.9 %        |
| 209Bi (KED) | 101.561 %             | 3,750,728 cps     | 0.5 %         |
| 232Th (KED) | 0.137 ppb             | 36,999 cps        | 75.9 %        |
| 238U (KED)  | 0.038 ppb             | 12,080 cps        | 136.3 %       |

## Sample Summary

Instrument ID: iCAP Q

Analysis index: 8

Analysis name: 191076ti

Analysis started at: 10/18/2021 3:25:37 PM

User name: WINDOWS-UPCI4ER\Administrator

| Category    | Concentration average | Concentration RSD |
|-------------|-----------------------|-------------------|
| 6Li (KED)   | 204.659 %             | 1.0 %             |
| 9Be (KED)   | 0.029 ppb             | 33.5 %            |
| 11B (KED)   | -1.672 ppb            | 13.8 %            |
| 24Mg (KED)  | 104.708 ppb           | 1.9 %             |
| 27Al (KED)  | 88.006 ppb            | 2.9 %             |
| 45Sc (KED)  | 209.421 %             | 1.1 %             |
| 51V (KED)   | 0.166 ppb             | 2.2 %             |
| 52Cr (KED)  | 0.329 ppb             | 4.4 %             |
| 55Mn (KED)  | 3.003 ppb             | 1.9 %             |
| 56Fe (KED)  | 108.698 ppb           | 1.2 %             |
| 58Ni (KED)  | 0.523 ppb             | 2.2 %             |
| 59Co (KED)  | 0.053 ppb             | 6.1 %             |
| 63Cu (KED)  | 0.552 ppb             | 1.8 %             |
| 64Zn (KED)  | 23.511 ppb            | 0.5 %             |
| 69Ga (KED)  | 0.384 ppb             | 2.3 %             |
| 75As (KED)  | 0.048 ppb             | 6.8 %             |
| 80Se (KED)  | -0.846 ppb            | 13.2 %            |
| 85Rb (KED)  | 0.535 ppb             | 7.8 %             |
| 88Sr (KED)  | 2.071 ppb             | 0.8 %             |
| 89Y (KED)   | 209.453 %             | 0.6 %             |
| 107Ag (KED) | 0.011 ppb             | 12.0 %            |
| 114Cd (KED) | 0.003 ppb             | 13.7 %            |
| 115In (KED) | 205.269 %             | 0.7 %             |
| 133Cs (KED) | 0.019 ppb             | 2.8 %             |
| 138Ba (KED) | 1.284 ppb             | 1.5 %             |
| 139La (KED) | 0.100 ppb             | 1.3 %             |
| 140Ce (KED) | 0.198 ppb             | 1.3 %             |
| 141Pr (KED) | 0.023 ppb             | 2.9 %             |
| 142Nd (KED) | 0.122 ppb             | 2.5 %             |
| 152Sm (KED) | 0.016 ppb             | 3.7 %             |
| 153Eu (KED) | 0.003 ppb             | 12.5 %            |
| 158Gd (KED) | 0.014 ppb             | 5.8 %             |
| 159Tb (KED) | 227.807 %             | 1.6 %             |
| 164Dy (KED) | 0.010 ppb             | 2.8 %             |
| 166Er (KED) | 0.002 ppb             | 28.7 %            |
| 169Tm (KED) | 0.001 ppb             | 17.6 %            |
| 174Yb (KED) | 0.004 ppb             | 7.4 %             |
| 175Lu (KED) | -0.107 ppb            | 2.9 %             |
| 205Tl (KED) | 0.002 ppb             | 6.0 %             |
| 208Pb (KED) | 0.268 ppb             | 2.2 %             |
| 209Bi (KED) | 212.216 %             | 1.9 %             |
| 232Th (KED) | 0.030 ppb             | 1.7 %             |
| 238U (KED)  | 0.005 ppb             | 0.1 %             |

| Category   | Concentration average | Intensity average | Intensity RSD |
|------------|-----------------------|-------------------|---------------|
| 6Li (KED)  | 204.659 %             | 6,136 cps         | 1.0 %         |
| 9Be (KED)  | 0.029 ppb             | 10 cps            | 33.3 %        |
| 11B (KED)  | -1.672 ppb            | 670 cps           | 6.6 %         |
| 24Mg (KED) | 104.708 ppb           | 119,057 cps       | 1.0 %         |
| 27Al (KED) | 88.006 ppb            | 25,205 cps        | 3.8 %         |

| Category    | Concentration average | Intensity average | Intensity RSD |
|-------------|-----------------------|-------------------|---------------|
| 45Sc (KED)  | 209.421 %             | 98,151 cps        | 1.1 %         |
| 51V (KED)   | 0.166 ppb             | 2,848 cps         | 1.6 %         |
| 52Cr (KED)  | 0.329 ppb             | 9,003 cps         | 3.8 %         |
| 55Mn (KED)  | 3.003 ppb             | 41,123 cps        | 0.8 %         |
| 56Fe (KED)  | 108.698 ppb           | 2,699,928 cps     | 0.7 %         |
| 58Ni (KED)  | 0.523 ppb             | 17,536 cps        | 1.5 %         |
| 59Co (KED)  | 0.053 ppb             | 2,853 cps         | 6.2 %         |
| 63Cu (KED)  | 0.552 ppb             | 41,673 cps        | 0.4 %         |
| 64Zn (KED)  | 23.511 ppb            | 299,191 cps       | 0.8 %         |
| 69Ga (KED)  | 0.384 ppb             | 5,238 cps         | 1.9 %         |
| 75As (KED)  | 0.048 ppb             | 196 cps           | 5.2 %         |
| 80Se (KED)  | -0.846 ppb            | 1,205 cps         | 10.2 %        |
| 85Rb (KED)  | 0.535 ppb             | 6,626 cps         | 7.1 %         |
| 88Sr (KED)  | 2.071 ppb             | 36,182 cps        | 0.2 %         |
| 89Y (KED)   | 209.453 %             | 900,932 cps       | 0.6 %         |
| 107Ag (KED) | 0.011 ppb             | 1,296 cps         | 11.7 %        |
| 114Cd (KED) | 0.003 ppb             | 320 cps           | 5.5 %         |
| 115In (KED) | 205.269 %             | 1,657,934 cps     | 0.7 %         |
| 133Cs (KED) | 0.019 ppb             | 1,196 cps         | 3.1 %         |
| 138Ba (KED) | 1.284 ppb             | 118,497 cps       | 0.4 %         |
| 139La (KED) | 0.100 ppb             | 19,501 cps        | 2.8 %         |
| 140Ce (KED) | 0.198 ppb             | 52,522 cps        | 1.2 %         |
| 141Pr (KED) | 0.023 ppb             | 6,435 cps         | 3.9 %         |
| 142Nd (KED) | 0.122 ppb             | 13,325 cps        | 0.9 %         |
| 152Sm (KED) | 0.016 ppb             | 1,617 cps         | 5.0 %         |
| 153Eu (KED) | 0.003 ppb             | 710 cps           | 10.6 %        |
| 158Gd (KED) | 0.014 ppb             | 1,911 cps         | 4.2 %         |
| 159Tb (KED) | 227.807 %             | 9,220,396 cps     | 1.6 %         |
| 164Dy (KED) | 0.010 ppb             | 1,511 cps         | 1.5 %         |
| 166Er (KED) | 0.002 ppb             | 1,611 cps         | 5.7 %         |
| 169Tm (KED) | 0.001 ppb             | 431 cps           | 13.9 %        |
| 174Yb (KED) | 0.004 ppb             | 911 cps           | 8.3 %         |
| 175Lu (KED) | -0.107 ppb            | 44,628 cps        | 1.6 %         |
| 205Tl (KED) | 0.002 ppb             | 811 cps           | 7.6 %         |
| 208Pb (KED) | 0.268 ppb             | 91,590 cps        | 0.6 %         |
| 209Bi (KED) | 212.216 %             | 7,837,285 cps     | 1.9 %         |
| 232Th (KED) | 0.030 ppb             | 17,224 cps        | 1.6 %         |
| 238U (KED)  | 0.005 ppb             | 3,802 cps         | 1.9 %         |

## Sample Summary

Instrument ID: iCAP Q

Analysis index: 9

Analysis name: w120ti

Analysis started at: 10/18/2021 3:29:39 PM

User name: WINDOWS-UPCI4ER\Administrator

| Category    | Concentration average | Concentration RSD |
|-------------|-----------------------|-------------------|
| 6Li (KED)   | 93.402 %              | 2.4 %             |
| 9Be (KED)   | 0.021 ppb             | 101.3 %           |
| 11B (KED)   | 2.636 ppb             | 11.4 %            |
| 24Mg (KED)  | 171.069 ppb           | 1.3 %             |
| 27Al (KED)  | 133.540 ppb           | 1.5 %             |
| 45Sc (KED)  | 94.537 %              | 1.1 %             |
| 51V (KED)   | 0.242 ppb             | 2.9 %             |
| 52Cr (KED)  | 0.553 ppb             | 2.3 %             |
| 55Mn (KED)  | 4.453 ppb             | 1.5 %             |
| 56Fe (KED)  | 155.055 ppb           | 1.0 %             |
| 58Ni (KED)  | 0.900 ppb             | 1.1 %             |
| 59Co (KED)  | 0.083 ppb             | 4.0 %             |
| 63Cu (KED)  | 2.028 ppb             | 3.7 %             |
| 64Zn (KED)  | 52.143 ppb            | 2.4 %             |
| 69Ga (KED)  | 0.638 ppb             | 0.2 %             |
| 75As (KED)  | 0.094 ppb             | 17.9 %            |
| 80Se (KED)  | 0.360 ppb             | 6.7 %             |
| 85Rb (KED)  | 1.038 ppb             | 2.0 %             |
| 88Sr (KED)  | 3.828 ppb             | 2.7 %             |
| 89Y (KED)   | 93.876 %              | 1.4 %             |
| 107Ag (KED) | 0.042 ppb             | 37.6 %            |
| 114Cd (KED) | 0.018 ppb             | 56.3 %            |
| 115In (KED) | 91.953 %              | 0.5 %             |
| 133Cs (KED) | 0.037 ppb             | 17.8 %            |
| 138Ba (KED) | 2.192 ppb             | 1.1 %             |
| 139La (KED) | 0.158 ppb             | 5.8 %             |
| 140Ce (KED) | 0.309 ppb             | 3.8 %             |
| 141Pr (KED) | 0.040 ppb             | 10.9 %            |
| 142Nd (KED) | 0.197 ppb             | 2.0 %             |
| 152Sm (KED) | 0.028 ppb             | 14.9 %            |
| 153Eu (KED) | 0.006 ppb             | 46.3 %            |
| 158Gd (KED) | 0.024 ppb             | 10.7 %            |
| 159Tb (KED) | 95.612 %              | 1.5 %             |
| 164Dy (KED) | 0.017 ppb             | 13.5 %            |
| 166Er (KED) | 0.006 ppb             | 24.0 %            |
| 169Tm (KED) | 0.002 ppb             | 73.7 %            |
| 174Yb (KED) | 0.007 ppb             | 21.5 %            |
| 175Lu (KED) | -0.107 ppb            | 1.8 %             |
| 205Tl (KED) | 0.004 ppb             | 15.7 %            |
| 208Pb (KED) | 0.317 ppb             | 0.8 %             |
| 209Bi (KED) | 91.139 %              | 1.5 %             |
| 232Th (KED) | 0.045 ppb             | 1.4 %             |
| 238U (KED)  | 0.011 ppb             | 4.9 %             |

| Category   | Concentration average | Intensity average | Intensity RSD |
|------------|-----------------------|-------------------|---------------|
| 6Li (KED)  | 93.402 %              | 2,800 cps         | 2.4 %         |
| 9Be (KED)  | 0.021 ppb             | 3 cps             | 100.0 %       |
| 11B (KED)  | 2.636 ppb             | 670 cps           | 6.1 %         |
| 24Mg (KED) | 171.069 ppb           | 88,706 cps        | 1.4 %         |
| 27Al (KED) | 133.540 ppb           | 17,234 cps        | 1.5 %         |

| Category    | Concentration average | Intensity average | Intensity RSD |
|-------------|-----------------------|-------------------|---------------|
| 45Sc (KED)  | 94.537 %              | 44,307 cps        | 1.1 %         |
| 51V (KED)   | 0.242 ppb             | 1,871 cps         | 3.1 %         |
| 52Cr (KED)  | 0.553 ppb             | 6,774 cps         | 3.3 %         |
| 55Mn (KED)  | 4.453 ppb             | 27,509 cps        | 1.0 %         |
| 56Fe (KED)  | 155.055 ppb           | 1,737,898 cps     | 1.3 %         |
| 58Ni (KED)  | 0.900 ppb             | 13,441 cps        | 1.0 %         |
| 59Co (KED)  | 0.083 ppb             | 1,999 cps         | 3.0 %         |
| 63Cu (KED)  | 2.028 ppb             | 45,376 cps        | 1.9 %         |
| 64Zn (KED)  | 52.143 ppb            | 293,503 cps       | 1.4 %         |
| 69Ga (KED)  | 0.638 ppb             | 3,861 cps         | 1.6 %         |
| 75As (KED)  | 0.094 ppb             | 157 cps           | 14.9 %        |
| 80Se (KED)  | 0.360 ppb             | 1,161 cps         | 2.5 %         |
| 85Rb (KED)  | 1.038 ppb             | 5,757 cps         | 2.8 %         |
| 88Sr (KED)  | 3.828 ppb             | 29,892 cps        | 1.2 %         |
| 89Y (KED)   | 93.876 %              | 403,795 cps       | 1.4 %         |
| 107Ag (KED) | 0.042 ppb             | 2,118 cps         | 37.2 %        |
| 114Cd (KED) | 0.018 ppb             | 419 cps           | 46.0 %        |
| 115In (KED) | 91.953 %              | 742,693 cps       | 0.5 %         |
| 133Cs (KED) | 0.037 ppb             | 1,023 cps         | 17.8 %        |
| 138Ba (KED) | 2.192 ppb             | 84,011 cps        | 0.6 %         |
| 139La (KED) | 0.158 ppb             | 12,893 cps        | 4.3 %         |
| 140Ce (KED) | 0.309 ppb             | 34,177 cps        | 2.5 %         |
| 141Pr (KED) | 0.040 ppb             | 4,610 cps         | 9.3 %         |
| 142Nd (KED) | 0.197 ppb             | 9,007 cps         | 0.5 %         |
| 152Sm (KED) | 0.028 ppb             | 1,155 cps         | 13.3 %        |
| 153Eu (KED) | 0.006 ppb             | 552 cps           | 42.6 %        |
| 158Gd (KED) | 0.024 ppb             | 1,338 cps         | 9.9 %         |
| 159Tb (KED) | 95.612 %              | 3,869,865 cps     | 1.5 %         |
| 164Dy (KED) | 0.017 ppb             | 1,050 cps         | 11.8 %        |
| 166Er (KED) | 0.006 ppb             | 959 cps           | 9.6 %         |
| 169Tm (KED) | 0.002 ppb             | 434 cps           | 66.2 %        |
| 174Yb (KED) | 0.007 ppb             | 647 cps           | 19.1 %        |
| 175Lu (KED) | -0.107 ppb            | 18,790 cps        | 0.5 %         |
| 205Tl (KED) | 0.004 ppb             | 718 cps           | 16.8 %        |
| 208Pb (KED) | 0.317 ppb             | 45,271 cps        | 0.8 %         |
| 209Bi (KED) | 91.139 %              | 3,365,833 cps     | 1.5 %         |
| 232Th (KED) | 0.045 ppb             | 10,966 cps        | 1.2 %         |
| 238U (KED)  | 0.011 ppb             | 3,193 cps         | 6.0 %         |

## Sample Summary

Instrument ID: iCAP Q

Analysis index: 10

Analysis name: 191067ti

Analysis started at: 10/18/2021 3:33:39 PM

User name: WINDOWS-UPCI4ER\Administrator

| Category    | Concentration average | Concentration RSD |
|-------------|-----------------------|-------------------|
| 6Li (KED)   | 109.193 %             | 2.1 %             |
| 9Be (KED)   | 0.018 ppb             | 2.1 %             |
| 11B (KED)   | 1.696 ppb             | 3.0 %             |
| 24Mg (KED)  | 80.082 ppb            | 2.1 %             |
| 27Al (KED)  | 38.279 ppb            | 2.0 %             |
| 45Sc (KED)  | 109.896 %             | 1.1 %             |
| 51V (KED)   | 0.074 ppb             | 4.0 %             |
| 52Cr (KED)  | 0.392 ppb             | 4.0 %             |
| 55Mn (KED)  | 1.681 ppb             | 3.4 %             |
| 56Fe (KED)  | 52.501 ppb            | 1.5 %             |
| 58Ni (KED)  | 0.476 ppb             | 2.6 %             |
| 59Co (KED)  | 0.039 ppb             | 5.6 %             |
| 63Cu (KED)  | 2.147 ppb             | 1.1 %             |
| 64Zn (KED)  | 50.853 ppb            | 0.6 %             |
| 69Ga (KED)  | 0.242 ppb             | 1.9 %             |
| 75As (KED)  | 0.039 ppb             | 34.3 %            |
| 80Se (KED)  | 0.216 ppb             | 33.7 %            |
| 85Rb (KED)  | 0.469 ppb             | 1.7 %             |
| 88Sr (KED)  | 1.369 ppb             | 0.9 %             |
| 89Y (KED)   | 108.664 %             | 0.4 %             |
| 107Ag (KED) | 0.076 ppb             | 2.4 %             |
| 114Cd (KED) | 0.008 ppb             | 5.7 %             |
| 115In (KED) | 106.392 %             | 1.0 %             |
| 133Cs (KED) | 0.010 ppb             | 10.4 %            |
| 138Ba (KED) | 0.816 ppb             | 1.2 %             |
| 139La (KED) | 0.037 ppb             | 3.4 %             |
| 140Ce (KED) | 0.086 ppb             | 2.2 %             |
| 141Pr (KED) | 0.009 ppb             | 2.5 %             |
| 142Nd (KED) | 0.054 ppb             | 2.9 %             |
| 152Sm (KED) | 0.007 ppb             | 15.6 %            |
| 153Eu (KED) | 0.001 ppb             | 17.8 %            |
| 158Gd (KED) | 0.006 ppb             | 9.0 %             |
| 159Tb (KED) | 116.179 %             | 2.2 %             |
| 164Dy (KED) | 0.004 ppb             | 9.5 %             |
| 166Er (KED) | 0.000 ppb             | 398.5 %           |
| 169Tm (KED) | 0.000 ppb             | 11.2 %            |
| 174Yb (KED) | 0.002 ppb             | 13.5 %            |
| 175Lu (KED) | -0.122 ppb            | 5.0 %             |
| 205Tl (KED) | 0.002 ppb             | 12.4 %            |
| 208Pb (KED) | 0.144 ppb             | 3.3 %             |
| 209Bi (KED) | 104.667 %             | 1.5 %             |
| 232Th (KED) | 0.014 ppb             | 0.8 %             |
| 238U (KED)  | 0.003 ppb             | 5.0 %             |

| Category   | Concentration average | Intensity average | Intensity RSD |
|------------|-----------------------|-------------------|---------------|
| 6Li (KED)  | 109.193 %             | 3,274 cps         | 2.1 %         |
| 9Be (KED)  | 0.018 ppb             | 3 cps             | 0.0 %         |
| 11B (KED)  | 1.696 ppb             | 690 cps           | 2.2 %         |
| 24Mg (KED) | 80.082 ppb            | 48,602 cps        | 1.5 %         |
| 27Al (KED) | 38.279 ppb            | 5,787 cps         | 1.0 %         |

| Category    | Concentration average | Intensity average | Intensity RSD |
|-------------|-----------------------|-------------------|---------------|
| 45Sc (KED)  | 109.896 %             | 51,506 cps        | 1.1 %         |
| 51V (KED)   | 0.074 ppb             | 662 cps           | 3.9 %         |
| 52Cr (KED)  | 0.392 ppb             | 5,600 cps         | 2.8 %         |
| 55Mn (KED)  | 1.681 ppb             | 12,098 cps        | 2.6 %         |
| 56Fe (KED)  | 52.501 ppb            | 685,446 cps       | 1.4 %         |
| 58Ni (KED)  | 0.476 ppb             | 8,410 cps         | 1.7 %         |
| 59Co (KED)  | 0.039 ppb             | 1,112 cps         | 6.5 %         |
| 63Cu (KED)  | 2.147 ppb             | 55,035 cps        | 0.6 %         |
| 64Zn (KED)  | 50.853 ppb            | 331,480 cps       | 0.4 %         |
| 69Ga (KED)  | 0.242 ppb             | 1,742 cps         | 1.4 %         |
| 75As (KED)  | 0.039 ppb             | 86 cps            | 27.6 %        |
| 80Se (KED)  | 0.216 ppb             | 1,258 cps         | 3.8 %         |
| 85Rb (KED)  | 0.469 ppb             | 3,018 cps         | 1.5 %         |
| 88Sr (KED)  | 1.369 ppb             | 12,444 cps        | 0.5 %         |
| 89Y (KED)   | 108.664 %             | 467,403 cps       | 0.4 %         |
| 107Ag (KED) | 0.076 ppb             | 4,419 cps         | 3.2 %         |
| 114Cd (KED) | 0.008 ppb             | 279 cps           | 4.8 %         |
| 115In (KED) | 106.392 %             | 859,317 cps       | 1.0 %         |
| 133Cs (KED) | 0.010 ppb             | 319 cps           | 9.0 %         |
| 138Ba (KED) | 0.816 ppb             | 39,014 cps        | 1.9 %         |
| 139La (KED) | 0.037 ppb             | 3,734 cps         | 3.0 %         |
| 140Ce (KED) | 0.086 ppb             | 11,916 cps        | 1.8 %         |
| 141Pr (KED) | 0.009 ppb             | 1,240 cps         | 4.5 %         |
| 142Nd (KED) | 0.054 ppb             | 3,036 cps         | 5.0 %         |
| 152Sm (KED) | 0.007 ppb             | 359 cps           | 13.0 %        |
| 153Eu (KED) | 0.001 ppb             | 154 cps           | 14.7 %        |
| 158Gd (KED) | 0.006 ppb             | 394 cps           | 6.3 %         |
| 159Tb (KED) | 116.179 %             | 4,702,312 cps     | 2.2 %         |
| 164Dy (KED) | 0.004 ppb             | 330 cps           | 9.6 %         |
| 166Er (KED) | 0.000 ppb             | 610 cps           | 10.5 %        |
| 169Tm (KED) | 0.000 ppb             | 103 cps           | 8.5 %         |
| 174Yb (KED) | 0.002 ppb             | 228 cps           | 9.7 %         |
| 175Lu (KED) | -0.122 ppb            | 20,100 cps        | 4.4 %         |
| 205Tl (KED) | 0.002 ppb             | 338 cps           | 12.8 %        |
| 208Pb (KED) | 0.144 ppb             | 27,948 cps        | 3.7 %         |
| 209Bi (KED) | 104.667 %             | 3,865,431 cps     | 1.5 %         |
| 232Th (KED) | 0.014 ppb             | 3,956 cps         | 1.3 %         |
| 238U (KED)  | 0.003 ppb             | 1,231 cps         | 5.3 %         |

## Sample Summary

Instrument ID: iCAP Q

Analysis index: 11

Analysis name: 191090ti

Analysis started at: 10/18/2021 3:37:54 PM

User name: WINDOWS-UPCI4ER\Administrator

| Category    | Concentration average | Concentration RSD |
|-------------|-----------------------|-------------------|
| 6Li (KED)   | 107.822 %             | 3.0 %             |
| 9Be (KED)   | 0.006 ppb             | 173.2 %           |
| 11B (KED)   | 4.779 ppb             | 3.7 %             |
| 24Mg (KED)  | 65.896 ppb            | 2.5 %             |
| 27Al (KED)  | 45.566 ppb            | 0.9 %             |
| 45Sc (KED)  | 106.078 %             | 1.0 %             |
| 51V (KED)   | 0.075 ppb             | 5.4 %             |
| 52Cr (KED)  | 0.323 ppb             | 1.6 %             |
| 55Mn (KED)  | 1.486 ppb             | 4.7 %             |
| 56Fe (KED)  | 57.452 ppb            | 1.3 %             |
| 58Ni (KED)  | 0.383 ppb             | 5.7 %             |
| 59Co (KED)  | 0.080 ppb             | 4.6 %             |
| 63Cu (KED)  | 1.746 ppb             | 1.2 %             |
| 64Zn (KED)  | 50.644 ppb            | 1.3 %             |
| 69Ga (KED)  | 0.285 ppb             | 6.1 %             |
| 75As (KED)  | 0.039 ppb             | 21.8 %            |
| 80Se (KED)  | 0.501 ppb             | 15.6 %            |
| 85Rb (KED)  | 0.805 ppb             | 0.5 %             |
| 88Sr (KED)  | 1.256 ppb             | 2.3 %             |
| 89Y (KED)   | 104.470 %             | 1.2 %             |
| 107Ag (KED) | 0.029 ppb             | 6.0 %             |
| 114Cd (KED) | 0.005 ppb             | 27.8 %            |
| 115In (KED) | 103.338 %             | 1.6 %             |
| 133Cs (KED) | 0.010 ppb             | 17.8 %            |
| 138Ba (KED) | 0.980 ppb             | 3.1 %             |
| 139La (KED) | 0.048 ppb             | 2.2 %             |
| 140Ce (KED) | 0.103 ppb             | 3.5 %             |
| 141Pr (KED) | 0.011 ppb             | 3.2 %             |
| 142Nd (KED) | 0.062 ppb             | 4.0 %             |
| 152Sm (KED) | 0.007 ppb             | 8.0 %             |
| 153Eu (KED) | 0.001 ppb             | 23.2 %            |
| 158Gd (KED) | 0.007 ppb             | 5.0 %             |
| 159Tb (KED) | 106.636 %             | 2.0 %             |
| 164Dy (KED) | 0.004 ppb             | 6.9 %             |
| 166Er (KED) | -0.001 ppb            | 47.5 %            |
| 169Tm (KED) | 0.000 ppb             | 65.0 %            |
| 174Yb (KED) | 0.002 ppb             | 8.2 %             |
| 175Lu (KED) | -0.119 ppb            | 1.2 %             |
| 205Tl (KED) | 0.002 ppb             | 6.7 %             |
| 208Pb (KED) | 0.187 ppb             | 1.5 %             |
| 209Bi (KED) | 100.825 %             | 0.7 %             |
| 232Th (KED) | 0.012 ppb             | 3.1 %             |
| 238U (KED)  | 0.004 ppb             | 6.1 %             |

| Category   | Concentration average | Intensity average | Intensity RSD |
|------------|-----------------------|-------------------|---------------|
| 6Li (KED)  | 107.822 %             | 3,233 cps         | 3.0 %         |
| 9Be (KED)  | 0.006 ppb             | 1 cps             | 173.2 %       |
| 11B (KED)  | 4.779 ppb             | 982 cps           | 4.4 %         |
| 24Mg (KED) | 65.896 ppb            | 39,499 cps        | 0.7 %         |
| 27Al (KED) | 45.566 ppb            | 6,638 cps         | 0.9 %         |

| Category    | Concentration average | Intensity average | Intensity RSD |
|-------------|-----------------------|-------------------|---------------|
| 45Sc (KED)  | 106.078 %             | 49,717 cps        | 1.0 %         |
| 51V (KED)   | 0.075 ppb             | 652 cps           | 5.1 %         |
| 52Cr (KED)  | 0.323 ppb             | 4,467 cps         | 0.7 %         |
| 55Mn (KED)  | 1.486 ppb             | 10,329 cps        | 3.9 %         |
| 56Fe (KED)  | 57.452 ppb            | 723,817 cps       | 0.5 %         |
| 58Ni (KED)  | 0.383 ppb             | 6,576 cps         | 4.5 %         |
| 59Co (KED)  | 0.080 ppb             | 2,168 cps         | 5.5 %         |
| 63Cu (KED)  | 1.746 ppb             | 44,836 cps        | 1.0 %         |
| 64Zn (KED)  | 50.644 ppb            | 317,393 cps       | 1.5 %         |
| 69Ga (KED)  | 0.285 ppb             | 1,957 cps         | 7.0 %         |
| 75As (KED)  | 0.039 ppb             | 82 cps            | 18.3 %        |
| 80Se (KED)  | 0.501 ppb             | 1,372 cps         | 2.1 %         |
| 85Rb (KED)  | 0.805 ppb             | 4,972 cps         | 1.2 %         |
| 88Sr (KED)  | 1.256 ppb             | 10,984 cps        | 1.6 %         |
| 89Y (KED)   | 104.470 %             | 449,365 cps       | 1.2 %         |
| 107Ag (KED) | 0.029 ppb             | 1,687 cps         | 6.9 %         |
| 114Cd (KED) | 0.005 ppb             | 192 cps           | 14.0 %        |
| 115In (KED) | 103.338 %             | 834,652 cps       | 1.6 %         |
| 133Cs (KED) | 0.010 ppb             | 326 cps           | 15.6 %        |
| 138Ba (KED) | 0.980 ppb             | 42,661 cps        | 1.2 %         |
| 139La (KED) | 0.048 ppb             | 4,359 cps         | 0.7 %         |
| 140Ce (KED) | 0.103 ppb             | 12,946 cps        | 2.7 %         |
| 141Pr (KED) | 0.011 ppb             | 1,481 cps         | 3.0 %         |
| 142Nd (KED) | 0.062 ppb             | 3,214 cps         | 3.3 %         |
| 152Sm (KED) | 0.007 ppb             | 348 cps           | 6.4 %         |
| 153Eu (KED) | 0.001 ppb             | 139 cps           | 18.3 %        |
| 158Gd (KED) | 0.007 ppb             | 448 cps           | 5.5 %         |
| 159Tb (KED) | 106.636 %             | 4,316,053 cps     | 2.0 %         |
| 164Dy (KED) | 0.004 ppb             | 307 cps           | 8.5 %         |
| 166Er (KED) | -0.001 ppb            | 478 cps           | 9.5 %         |
| 169Tm (KED) | 0.000 ppb             | 90 cps            | 35.3 %        |
| 174Yb (KED) | 0.002 ppb             | 203 cps           | 5.9 %         |
| 175Lu (KED) | -0.119 ppb            | 18,879 cps        | 1.6 %         |
| 205Tl (KED) | 0.002 ppb             | 339 cps           | 5.7 %         |
| 208Pb (KED) | 0.187 ppb             | 32,615 cps        | 1.6 %         |
| 209Bi (KED) | 100.825 %             | 3,723,521 cps     | 0.7 %         |
| 232Th (KED) | 0.012 ppb             | 3,422 cps         | 3.3 %         |
| 238U (KED)  | 0.004 ppb             | 1,461 cps         | 4.8 %         |

## Sample Summary

Instrument ID: iCAP Q

Analysis index: 12

Analysis name: w132ti

Analysis started at: 10/18/2021 3:41:46 PM

User name: WINDOWS-UPCI4ER\Administrator

| Category    | Concentration average | Concentration RSD |
|-------------|-----------------------|-------------------|
| 6Li (KED)   | 107.933 %             | 4.9 %             |
| 9Be (KED)   | 0.000 ppb             |                   |
| 11B (KED)   | 1.372 ppb             | 13.8 %            |
| 24Mg (KED)  | 68.982 ppb            | 3.9 %             |
| 27Al (KED)  | 38.175 ppb            | 2.5 %             |
| 45Sc (KED)  | 106.635 %             | 0.9 %             |
| 51V (KED)   | 0.119 ppb             | 3.3 %             |
| 52Cr (KED)  | 0.372 ppb             | 0.7 %             |
| 55Mn (KED)  | 1.839 ppb             | 1.7 %             |
| 56Fe (KED)  | 51.540 ppb            | 1.1 %             |
| 58Ni (KED)  | 0.594 ppb             | 0.9 %             |
| 59Co (KED)  | 0.036 ppb             | 5.0 %             |
| 63Cu (KED)  | 2.182 ppb             | 3.2 %             |
| 64Zn (KED)  | 46.419 ppb            | 2.4 %             |
| 69Ga (KED)  | 0.276 ppb             | 2.5 %             |
| 75As (KED)  | 0.054 ppb             | 28.1 %            |
| 80Se (KED)  | 0.480 ppb             | 9.3 %             |
| 85Rb (KED)  | 0.637 ppb             | 2.5 %             |
| 88Sr (KED)  | 1.628 ppb             | 1.5 %             |
| 89Y (KED)   | 104.722 %             | 1.9 %             |
| 107Ag (KED) | 0.067 ppb             | 2.2 %             |
| 114Cd (KED) | 0.010 ppb             | 6.5 %             |
| 115In (KED) | 101.215 %             | 0.8 %             |
| 133Cs (KED) | 0.008 ppb             | 20.5 %            |
| 138Ba (KED) | 0.912 ppb             | 4.4 %             |
| 139La (KED) | 0.064 ppb             | 3.7 %             |
| 140Ce (KED) | 0.085 ppb             | 2.7 %             |
| 141Pr (KED) | 0.009 ppb             | 1.3 %             |
| 142Nd (KED) | 0.051 ppb             | 1.8 %             |
| 152Sm (KED) | 0.006 ppb             | 12.5 %            |
| 153Eu (KED) | 0.001 ppb             | 9.6 %             |
| 158Gd (KED) | 0.005 ppb             | 1.1 %             |
| 159Tb (KED) | 107.157 %             | 3.9 %             |
| 164Dy (KED) | 0.004 ppb             | 18.1 %            |
| 166Er (KED) | -0.001 ppb            | 7.5 %             |
| 169Tm (KED) | 0.000 ppb             | 8.9 %             |
| 174Yb (KED) | 0.001 ppb             | 10.6 %            |
| 175Lu (KED) | -0.121 ppb            | 3.2 %             |
| 205Tl (KED) | 0.002 ppb             | 18.2 %            |
| 208Pb (KED) | 0.185 ppb             | 2.6 %             |
| 209Bi (KED) | 99.266 %              | 1.8 %             |
| 232Th (KED) | 0.011 ppb             | 2.8 %             |
| 238U (KED)  | 0.004 ppb             | 5.3 %             |

| Category   | Concentration average | Intensity average | Intensity RSD |
|------------|-----------------------|-------------------|---------------|
| 6Li (KED)  | 107.933 %             | 3,236 cps         | 4.9 %         |
| 9Be (KED)  | 0.000 ppb             | 0 cps             |               |
| 11B (KED)  | 1.372 ppb             | 650 cps           | 3.4 %         |
| 24Mg (KED) | 68.982 ppb            | 41,356 cps        | 1.7 %         |
| 27Al (KED) | 38.175 ppb            | 5,600 cps         | 1.6 %         |

| Category    | Concentration average | Intensity average | Intensity RSD |
|-------------|-----------------------|-------------------|---------------|
| 45Sc (KED)  | 106.635 %             | 49,978 cps        | 0.9 %         |
| 51V (KED)   | 0.119 ppb             | 1,037 cps         | 3.9 %         |
| 52Cr (KED)  | 0.372 ppb             | 5,161 cps         | 1.6 %         |
| 55Mn (KED)  | 1.839 ppb             | 12,841 cps        | 1.5 %         |
| 56Fe (KED)  | 51.540 ppb            | 652,994 cps       | 1.1 %         |
| 58Ni (KED)  | 0.594 ppb             | 10,101 cps        | 0.6 %         |
| 59Co (KED)  | 0.036 ppb             | 996 cps           | 5.6 %         |
| 63Cu (KED)  | 2.182 ppb             | 53,732 cps        | 0.8 %         |
| 64Zn (KED)  | 46.419 ppb            | 291,834 cps       | 0.8 %         |
| 69Ga (KED)  | 0.276 ppb             | 1,901 cps         | 1.8 %         |
| 75As (KED)  | 0.054 ppb             | 107 cps           | 22.5 %        |
| 80Se (KED)  | 0.480 ppb             | 1,363 cps         | 0.9 %         |
| 85Rb (KED)  | 0.637 ppb             | 3,943 cps         | 4.3 %         |
| 88Sr (KED)  | 1.628 ppb             | 14,246 cps        | 2.8 %         |
| 89Y (KED)   | 104.722 %             | 450,449 cps       | 1.9 %         |
| 107Ag (KED) | 0.067 ppb             | 3,675 cps         | 2.4 %         |
| 114Cd (KED) | 0.010 ppb             | 297 cps           | 5.1 %         |
| 115In (KED) | 101.215 %             | 817,506 cps       | 0.8 %         |
| 133Cs (KED) | 0.008 ppb             | 249 cps           | 18.8 %        |
| 138Ba (KED) | 0.912 ppb             | 39,976 cps        | 0.5 %         |
| 139La (KED) | 0.064 ppb             | 5,890 cps         | 0.8 %         |
| 140Ce (KED) | 0.085 ppb             | 10,805 cps        | 1.4 %         |
| 141Pr (KED) | 0.009 ppb             | 1,221 cps         | 4.0 %         |
| 142Nd (KED) | 0.051 ppb             | 2,679 cps         | 3.3 %         |
| 152Sm (KED) | 0.006 ppb             | 291 cps           | 8.7 %         |
| 153Eu (KED) | 0.001 ppb             | 128 cps           | 4.0 %         |
| 158Gd (KED) | 0.005 ppb             | 338 cps           | 3.5 %         |
| 159Tb (KED) | 107.157 %             | 4,337,117 cps     | 3.9 %         |
| 164Dy (KED) | 0.004 ppb             | 290 cps           | 13.3 %        |
| 166Er (KED) | -0.001 ppb            | 457 cps           | 2.6 %         |
| 169Tm (KED) | 0.000 ppb             | 106 cps           | 1.8 %         |
| 174Yb (KED) | 0.001 ppb             | 166 cps           | 11.1 %        |
| 175Lu (KED) | -0.121 ppb            | 18,656 cps        | 2.5 %         |
| 205Tl (KED) | 0.002 ppb             | 367 cps           | 17.0 %        |
| 208Pb (KED) | 0.185 ppb             | 31,830 cps        | 1.3 %         |
| 209Bi (KED) | 99.266 %              | 3,665,969 cps     | 1.8 %         |
| 232Th (KED) | 0.011 ppb             | 3,055 cps         | 1.6 %         |
| 238U (KED)  | 0.004 ppb             | 1,495 cps         | 3.5 %         |

## Sample Summary

Instrument ID: iCAP Q

Analysis index: 13

Analysis name: 191086ti

Analysis started at: 10/18/2021 3:45:43 PM

User name: WINDOWS-UPCI4ER\Administrator

| Category    | Concentration average | Concentration RSD |
|-------------|-----------------------|-------------------|
| 6Li (KED)   | 108.081 %             | 4.5 %             |
| 9Be (KED)   | 0.000 ppb             |                   |
| 11B (KED)   | 13.402 ppb            | 3.8 %             |
| 24Mg (KED)  | 125.004 ppb           | 4.0 %             |
| 27Al (KED)  | 110.832 ppb           | 0.9 %             |
| 45Sc (KED)  | 106.071 %             | 3.0 %             |
| 51V (KED)   | 0.201 ppb             | 4.9 %             |
| 52Cr (KED)  | 0.478 ppb             | 3.6 %             |
| 55Mn (KED)  | 3.732 ppb             | 5.5 %             |
| 56Fe (KED)  | 132.177 ppb           | 2.8 %             |
| 58Ni (KED)  | 0.816 ppb             | 3.7 %             |
| 59Co (KED)  | 0.061 ppb             | 5.4 %             |
| 63Cu (KED)  | 1.465 ppb             | 0.8 %             |
| 64Zn (KED)  | 55.286 ppb            | 1.1 %             |
| 69Ga (KED)  | 0.501 ppb             | 4.1 %             |
| 75As (KED)  | 0.052 ppb             | 10.4 %            |
| 80Se (KED)  | 0.522 ppb             | 28.4 %            |
| 85Rb (KED)  | 0.886 ppb             | 2.2 %             |
| 88Sr (KED)  | 2.730 ppb             | 2.0 %             |
| 89Y (KED)   | 103.798 %             | 1.2 %             |
| 107Ag (KED) | 0.012 ppb             | 10.4 %            |
| 114Cd (KED) | 0.007 ppb             | 8.3 %             |
| 115In (KED) | 99.481 %              | 1.0 %             |
| 133Cs (KED) | 0.026 ppb             | 9.1 %             |
| 138Ba (KED) | 1.748 ppb             | 1.0 %             |
| 139La (KED) | 0.123 ppb             | 1.4 %             |
| 140Ce (KED) | 0.244 ppb             | 0.9 %             |
| 141Pr (KED) | 0.029 ppb             | 3.4 %             |
| 142Nd (KED) | 0.154 ppb             | 3.5 %             |
| 152Sm (KED) | 0.018 ppb             | 8.2 %             |
| 153Eu (KED) | 0.003 ppb             | 15.6 %            |
| 158Gd (KED) | 0.016 ppb             | 7.5 %             |
| 159Tb (KED) | 103.485 %             | 1.0 %             |
| 164Dy (KED) | 0.011 ppb             | 5.1 %             |
| 166Er (KED) | 0.003 ppb             | 40.6 %            |
| 169Tm (KED) | 0.001 ppb             | 20.6 %            |
| 174Yb (KED) | 0.005 ppb             | 7.3 %             |
| 175Lu (KED) | -0.121 ppb            | 2.9 %             |
| 205Tl (KED) | 0.002 ppb             | 5.1 %             |
| 208Pb (KED) | 0.218 ppb             | 0.7 %             |
| 209Bi (KED) | 97.756 %              | 1.0 %             |
| 232Th (KED) | 0.028 ppb             | 3.0 %             |
| 238U (KED)  | 0.006 ppb             | 4.0 %             |

| Category   | Concentration average | Intensity average | Intensity RSD |
|------------|-----------------------|-------------------|---------------|
| 6Li (KED)  | 108.081 %             | 3,240 cps         | 4.5 %         |
| 9Be (KED)  | 0.000 ppb             | 0 cps             |               |
| 11B (KED)  | 13.402 ppb            | 1,827 cps         | 4.5 %         |
| 24Mg (KED) | 125.004 ppb           | 74,961 cps        | 0.4 %         |
| 27Al (KED) | 110.832 ppb           | 16,057 cps        | 2.2 %         |

| Category    | Concentration average | Intensity average | Intensity RSD |
|-------------|-----------------------|-------------------|---------------|
| 45Sc (KED)  | 106.071 %             | 49,713 cps        | 3.0 %         |
| 51V (KED)   | 0.201 ppb             | 1,743 cps         | 2.0 %         |
| 52Cr (KED)  | 0.478 ppb             | 6,575 cps         | 1.8 %         |
| 55Mn (KED)  | 3.732 ppb             | 25,857 cps        | 3.6 %         |
| 56Fe (KED)  | 132.177 ppb           | 1,661,648 cps     | 0.3 %         |
| 58Ni (KED)  | 0.816 ppb             | 13,704 cps        | 2.0 %         |
| 59Co (KED)  | 0.061 ppb             | 1,645 cps         | 2.5 %         |
| 63Cu (KED)  | 1.465 ppb             | 38,931 cps        | 1.1 %         |
| 64Zn (KED)  | 55.286 ppb            | 343,913 cps       | 0.2 %         |
| 69Ga (KED)  | 0.501 ppb             | 3,365 cps         | 3.0 %         |
| 75As (KED)  | 0.052 ppb             | 103 cps           | 9.7 %         |
| 80Se (KED)  | 0.522 ppb             | 1,376 cps         | 5.9 %         |
| 85Rb (KED)  | 0.886 ppb             | 5,431 cps         | 2.5 %         |
| 88Sr (KED)  | 2.730 ppb             | 23,606 cps        | 2.3 %         |
| 89Y (KED)   | 103.798 %             | 446,472 cps       | 1.2 %         |
| 107Ag (KED) | 0.012 ppb             | 704 cps           | 10.6 %        |
| 114Cd (KED) | 0.007 ppb             | 232 cps           | 5.0 %         |
| 115In (KED) | 99.481 %              | 803,499 cps       | 1.0 %         |
| 133Cs (KED) | 0.026 ppb             | 787 cps           | 8.5 %         |
| 138Ba (KED) | 1.748 ppb             | 72,798 cps        | 0.3 %         |
| 139La (KED) | 0.123 ppb             | 10,858 cps        | 0.4 %         |
| 140Ce (KED) | 0.244 ppb             | 29,321 cps        | 0.9 %         |
| 141Pr (KED) | 0.029 ppb             | 3,569 cps         | 2.9 %         |
| 142Nd (KED) | 0.154 ppb             | 7,652 cps         | 3.8 %         |
| 152Sm (KED) | 0.018 ppb             | 806 cps           | 7.2 %         |
| 153Eu (KED) | 0.003 ppb             | 331 cps           | 13.4 %        |
| 158Gd (KED) | 0.016 ppb             | 994 cps           | 7.4 %         |
| 159Tb (KED) | 103.485 %             | 4,188,521 cps     | 1.0 %         |
| 164Dy (KED) | 0.011 ppb             | 777 cps           | 5.5 %         |
| 166Er (KED) | 0.003 ppb             | 771 cps           | 11.3 %        |
| 169Tm (KED) | 0.001 ppb             | 213 cps           | 18.0 %        |
| 174Yb (KED) | 0.005 ppb             | 497 cps           | 7.5 %         |
| 175Lu (KED) | -0.121 ppb            | 18,058 cps        | 2.9 %         |
| 205Tl (KED) | 0.002 ppb             | 393 cps           | 5.9 %         |
| 208Pb (KED) | 0.218 ppb             | 35,658 cps        | 1.0 %         |
| 209Bi (KED) | 97.756 %              | 3,610,210 cps     | 1.0 %         |
| 232Th (KED) | 0.028 ppb             | 7,273 cps         | 3.8 %         |
| 238U (KED)  | 0.006 ppb             | 2,039 cps         | 2.9 %         |

## Sample Summary

Instrument ID: iCAP Q

Analysis index: 14

Analysis name: w121ti

Analysis started at: 10/18/2021 3:49:49 PM

User name: WINDOWS-UPCI4ER\Administrator

| Category    | Concentration average | Concentration RSD |
|-------------|-----------------------|-------------------|
| 6Li (KED)   | 113.197 %             | 1.1 %             |
| 9Be (KED)   | 0.000 ppb             |                   |
| 11B (KED)   | 4.907 ppb             | 16.7 %            |
| 24Mg (KED)  | 106.675 ppb           | 1.3 %             |
| 27Al (KED)  | 56.996 ppb            | 1.3 %             |
| 45Sc (KED)  | 111.501 %             | 0.7 %             |
| 51V (KED)   | 0.107 ppb             | 5.3 %             |
| 52Cr (KED)  | 0.270 ppb             | 1.0 %             |
| 55Mn (KED)  | 2.360 ppb             | 0.8 %             |
| 56Fe (KED)  | 77.251 ppb            | 0.9 %             |
| 58Ni (KED)  | 0.501 ppb             | 0.9 %             |
| 59Co (KED)  | 0.053 ppb             | 3.3 %             |
| 63Cu (KED)  | 1.948 ppb             | 1.8 %             |
| 64Zn (KED)  | 51.403 ppb            | 0.9 %             |
| 69Ga (KED)  | 0.341 ppb             | 4.2 %             |
| 75As (KED)  | 0.048 ppb             | 31.2 %            |
| 80Se (KED)  | 0.481 ppb             | 8.0 %             |
| 85Rb (KED)  | 0.829 ppb             | 5.6 %             |
| 88Sr (KED)  | 2.288 ppb             | 1.1 %             |
| 89Y (KED)   | 108.127 %             | 1.5 %             |
| 107Ag (KED) | 0.015 ppb             | 10.5 %            |
| 114Cd (KED) | 0.009 ppb             | 4.0 %             |
| 115In (KED) | 104.583 %             | 0.8 %             |
| 133Cs (KED) | 0.014 ppb             | 10.4 %            |
| 138Ba (KED) | 1.154 ppb             | 3.5 %             |
| 139La (KED) | 0.069 ppb             | 6.4 %             |
| 140Ce (KED) | 0.147 ppb             | 4.6 %             |
| 141Pr (KED) | 0.016 ppb             | 5.5 %             |
| 142Nd (KED) | 0.091 ppb             | 4.8 %             |
| 152Sm (KED) | 0.011 ppb             | 0.5 %             |
| 153Eu (KED) | 0.002 ppb             | 13.1 %            |
| 158Gd (KED) | 0.009 ppb             | 9.8 %             |
| 159Tb (KED) | 112.687 %             | 5.6 %             |
| 164Dy (KED) | 0.007 ppb             | 7.6 %             |
| 166Er (KED) | 0.000 ppb             | 1,628.9 %         |
| 169Tm (KED) | 0.000 ppb             | 31.3 %            |
| 174Yb (KED) | 0.002 ppb             | 17.2 %            |
| 175Lu (KED) | -0.126 ppb            | 5.3 %             |
| 205Tl (KED) | 0.002 ppb             | 7.4 %             |
| 208Pb (KED) | 0.174 ppb             | 1.5 %             |
| 209Bi (KED) | 101.354 %             | 2.1 %             |
| 232Th (KED) | 0.021 ppb             | 3.1 %             |
| 238U (KED)  | 0.006 ppb             | 5.4 %             |

| Category   | Concentration average | Intensity average | Intensity RSD |
|------------|-----------------------|-------------------|---------------|
| 6Li (KED)  | 113.197 %             | 3,394 cps         | 1.1 %         |
| 9Be (KED)  | 0.000 ppb             | 0 cps             |               |
| 11B (KED)  | 4.907 ppb             | 1,044 cps         | 8.8 %         |
| 24Mg (KED) | 106.675 ppb           | 67,090 cps        | 1.2 %         |
| 27Al (KED) | 56.996 ppb            | 8,712 cps         | 0.8 %         |

| Category    | Concentration average | Intensity average | Intensity RSD |
|-------------|-----------------------|-------------------|---------------|
| 45Sc (KED)  | 111.501 %             | 52,258 cps        | 0.7 %         |
| 51V (KED)   | 0.107 ppb             | 974 cps           | 4.9 %         |
| 52Cr (KED)  | 0.270 ppb             | 3,952 cps         | 1.7 %         |
| 55Mn (KED)  | 2.360 ppb             | 17,216 cps        | 0.1 %         |
| 56Fe (KED)  | 77.251 ppb            | 1,022,303 cps     | 0.5 %         |
| 58Ni (KED)  | 0.501 ppb             | 8,955 cps         | 1.4 %         |
| 59Co (KED)  | 0.053 ppb             | 1,500 cps         | 2.5 %         |
| 63Cu (KED)  | 1.948 ppb             | 50,612 cps        | 0.8 %         |
| 64Zn (KED)  | 51.403 ppb            | 333,343 cps       | 0.6 %         |
| 69Ga (KED)  | 0.341 ppb             | 2,411 cps         | 3.2 %         |
| 75As (KED)  | 0.048 ppb             | 100 cps           | 26.5 %        |
| 80Se (KED)  | 0.481 ppb             | 1,409 cps         | 1.7 %         |
| 85Rb (KED)  | 0.829 ppb             | 5,299 cps         | 6.1 %         |
| 88Sr (KED)  | 2.288 ppb             | 20,624 cps        | 0.7 %         |
| 89Y (KED)   | 108.127 %             | 465,095 cps       | 1.5 %         |
| 107Ag (KED) | 0.015 ppb             | 907 cps           | 10.7 %        |
| 114Cd (KED) | 0.009 ppb             | 281 cps           | 2.7 %         |
| 115In (KED) | 104.583 %             | 844,707 cps       | 0.8 %         |
| 133Cs (KED) | 0.014 ppb             | 438 cps           | 9.6 %         |
| 138Ba (KED) | 1.154 ppb             | 52,779 cps        | 2.2 %         |
| 139La (KED) | 0.069 ppb             | 6,674 cps         | 1.9 %         |
| 140Ce (KED) | 0.147 ppb             | 19,294 cps        | 2.6 %         |
| 141Pr (KED) | 0.016 ppb             | 2,202 cps         | 1.5 %         |
| 142Nd (KED) | 0.091 ppb             | 4,959 cps         | 4.5 %         |
| 152Sm (KED) | 0.011 ppb             | 531 cps           | 5.3 %         |
| 153Eu (KED) | 0.002 ppb             | 222 cps           | 6.2 %         |
| 158Gd (KED) | 0.009 ppb             | 584 cps           | 10.5 %        |
| 159Tb (KED) | 112.687 %             | 4,560,937 cps     | 5.6 %         |
| 164Dy (KED) | 0.007 ppb             | 524 cps           | 2.2 %         |
| 166Er (KED) | 0.000 ppb             | 610 cps           | 12.9 %        |
| 169Tm (KED) | 0.000 ppb             | 134 cps           | 17.6 %        |
| 174Yb (KED) | 0.002 ppb             | 278 cps           | 10.3 %        |
| 175Lu (KED) | -0.126 ppb            | 18,700 cps        | 3.0 %         |
| 205Tl (KED) | 0.002 ppb             | 357 cps           | 6.1 %         |
| 208Pb (KED) | 0.174 ppb             | 31,065 cps        | 2.7 %         |
| 209Bi (KED) | 101.354 %             | 3,743,054 cps     | 2.1 %         |
| 232Th (KED) | 0.021 ppb             | 5,691 cps         | 2.9 %         |
| 238U (KED)  | 0.006 ppb             | 1,888 cps         | 2.9 %         |

## Sample Summary

Instrument ID: iCAP Q

Analysis index: 15

Analysis name: w131ti

Analysis started at: 10/18/2021 3:53:48 PM

User name: WINDOWS-UPCI4ER\Administrator

| Category    | Concentration average | Concentration RSD |
|-------------|-----------------------|-------------------|
| 6Li (KED)   | 112.715 %             | 5.5 %             |
| 9Be (KED)   | 0.011 ppb             | 173.2 %           |
| 11B (KED)   | 4.309 ppb             | 4.7 %             |
| 24Mg (KED)  | 146.258 ppb           | 5.4 %             |
| 27Al (KED)  | 122.255 ppb           | 1.2 %             |
| 45Sc (KED)  | 111.977 %             | 0.7 %             |
| 51V (KED)   | 0.224 ppb             | 5.6 %             |
| 52Cr (KED)  | 0.447 ppb             | 1.3 %             |
| 55Mn (KED)  | 4.030 ppb             | 2.0 %             |
| 56Fe (KED)  | 159.763 ppb           | 1.3 %             |
| 58Ni (KED)  | 1.043 ppb             | 3.1 %             |
| 59Co (KED)  | 0.067 ppb             | 3.9 %             |
| 63Cu (KED)  | 1.788 ppb             | 1.4 %             |
| 64Zn (KED)  | 53.126 ppb            | 0.8 %             |
| 69Ga (KED)  | 0.604 ppb             | 4.0 %             |
| 75As (KED)  | 0.081 ppb             | 4.3 %             |
| 80Se (KED)  | 0.440 ppb             | 40.1 %            |
| 85Rb (KED)  | 0.664 ppb             | 5.1 %             |
| 88Sr (KED)  | 2.928 ppb             | 0.7 %             |
| 89Y (KED)   | 109.116 %             | 1.0 %             |
| 107Ag (KED) | 0.012 ppb             | 10.3 %            |
| 114Cd (KED) | 0.007 ppb             | 25.6 %            |
| 115In (KED) | 105.182 %             | 1.0 %             |
| 133Cs (KED) | 0.025 ppb             | 3.3 %             |
| 138Ba (KED) | 2.020 ppb             | 2.6 %             |
| 139La (KED) | 0.120 ppb             | 2.9 %             |
| 140Ce (KED) | 0.240 ppb             | 5.0 %             |
| 141Pr (KED) | 0.029 ppb             | 8.7 %             |
| 142Nd (KED) | 0.155 ppb             | 3.4 %             |
| 152Sm (KED) | 0.020 ppb             | 9.5 %             |
| 153Eu (KED) | 0.004 ppb             | 15.0 %            |
| 158Gd (KED) | 0.019 ppb             | 4.8 %             |
| 159Tb (KED) | 111.312 %             | 1.2 %             |
| 164Dy (KED) | 0.013 ppb             | 1.1 %             |
| 166Er (KED) | 0.002 ppb             | 20.8 %            |
| 169Tm (KED) | 0.001 ppb             | 13.3 %            |
| 174Yb (KED) | 0.005 ppb             | 8.0 %             |
| 175Lu (KED) | -0.124 ppb            | 4.1 %             |
| 205Tl (KED) | 0.002 ppb             | 6.3 %             |
| 208Pb (KED) | 0.290 ppb             | 1.1 %             |
| 209Bi (KED) | 101.088 %             | 2.1 %             |
| 232Th (KED) | 0.031 ppb             | 3.6 %             |
| 238U (KED)  | 0.008 ppb             | 3.1 %             |

| Category   | Concentration average | Intensity average | Intensity RSD |
|------------|-----------------------|-------------------|---------------|
| 6Li (KED)  | 112.715 %             | 3,379 cps         | 5.5 %         |
| 9Be (KED)  | 0.011 ppb             | 2 cps             | 173.2 %       |
| 11B (KED)  | 4.309 ppb             | 979 cps           | 6.6 %         |
| 24Mg (KED) | 146.258 ppb           | 91,377 cps        | 0.4 %         |
| 27Al (KED) | 122.255 ppb           | 18,694 cps        | 1.1 %         |

| Category    | Concentration average | Intensity average | Intensity RSD |
|-------------|-----------------------|-------------------|---------------|
| 45Sc (KED)  | 111.977 %             | 52,481 cps        | 0.7 %         |
| 51V (KED)   | 0.224 ppb             | 2,045 cps         | 5.4 %         |
| 52Cr (KED)  | 0.447 ppb             | 6,498 cps         | 0.8 %         |
| 55Mn (KED)  | 4.030 ppb             | 29,493 cps        | 1.3 %         |
| 56Fe (KED)  | 159.763 ppb           | 2,120,859 cps     | 0.6 %         |
| 58Ni (KED)  | 1.043 ppb             | 18,402 cps        | 2.5 %         |
| 59Co (KED)  | 0.067 ppb             | 1,911 cps         | 3.1 %         |
| 63Cu (KED)  | 1.788 ppb             | 47,702 cps        | 0.9 %         |
| 64Zn (KED)  | 53.126 ppb            | 347,592 cps       | 1.7 %         |
| 69Ga (KED)  | 0.604 ppb             | 4,249 cps         | 4.7 %         |
| 75As (KED)  | 0.081 ppb             | 159 cps           | 4.8 %         |
| 80Se (KED)  | 0.440 ppb             | 1,397 cps         | 6.8 %         |
| 85Rb (KED)  | 0.664 ppb             | 4,283 cps         | 4.3 %         |
| 88Sr (KED)  | 2.928 ppb             | 26,608 cps        | 1.4 %         |
| 89Y (KED)   | 109.116 %             | 469,349 cps       | 1.0 %         |
| 107Ag (KED) | 0.012 ppb             | 730 cps           | 9.1 %         |
| 114Cd (KED) | 0.007 ppb             | 241 cps           | 15.9 %        |
| 115In (KED) | 105.182 %             | 849,548 cps       | 1.0 %         |
| 133Cs (KED) | 0.025 ppb             | 803 cps           | 4.0 %         |
| 138Ba (KED) | 2.020 ppb             | 90,221 cps        | 1.4 %         |
| 139La (KED) | 0.120 ppb             | 11,390 cps        | 2.3 %         |
| 140Ce (KED) | 0.240 ppb             | 30,962 cps        | 3.7 %         |
| 141Pr (KED) | 0.029 ppb             | 3,907 cps         | 7.3 %         |
| 142Nd (KED) | 0.155 ppb             | 8,299 cps         | 3.0 %         |
| 152Sm (KED) | 0.020 ppb             | 959 cps           | 8.4 %         |
| 153Eu (KED) | 0.004 ppb             | 406 cps           | 13.5 %        |
| 158Gd (KED) | 0.019 ppb             | 1,218 cps         | 3.6 %         |
| 159Tb (KED) | 111.312 %             | 4,505,296 cps     | 1.2 %         |
| 164Dy (KED) | 0.013 ppb             | 970 cps           | 0.6 %         |
| 166Er (KED) | 0.002 ppb             | 780 cps           | 5.9 %         |
| 169Tm (KED) | 0.001 ppb             | 256 cps           | 10.0 %        |
| 174Yb (KED) | 0.005 ppb             | 547 cps           | 7.0 %         |
| 175Lu (KED) | -0.124 ppb            | 18,812 cps        | 3.9 %         |
| 205Tl (KED) | 0.002 ppb             | 459 cps           | 4.0 %         |
| 208Pb (KED) | 0.290 ppb             | 46,633 cps        | 2.2 %         |
| 209Bi (KED) | 101.088 %             | 3,733,260 cps     | 2.1 %         |
| 232Th (KED) | 0.031 ppb             | 8,318 cps         | 1.6 %         |
| 238U (KED)  | 0.008 ppb             | 2,560 cps         | 3.8 %         |

## Sample Summary

Instrument ID: iCAP Q

Analysis index: 16

Analysis name: w129ti

Analysis started at: 10/18/2021 3:57:49 PM

User name: WINDOWS-UPCI4ER\Administrator

| Category    | Concentration average | Concentration RSD |
|-------------|-----------------------|-------------------|
| 6Li (KED)   | 115.347 %             | 3.0 %             |
| 9Be (KED)   | 0.011 ppb             | 173.2 %           |
| 11B (KED)   | 2.719 ppb             | 41.6 %            |
| 24Mg (KED)  | 157.944 ppb           | 1.9 %             |
| 27Al (KED)  | 97.760 ppb            | 2.1 %             |
| 45Sc (KED)  | 115.003 %             | 1.1 %             |
| 51V (KED)   | 0.176 ppb             | 4.2 %             |
| 52Cr (KED)  | 0.471 ppb             | 0.6 %             |
| 55Mn (KED)  | 3.186 ppb             | 1.4 %             |
| 56Fe (KED)  | 115.513 ppb           | 0.2 %             |
| 58Ni (KED)  | 0.627 ppb             | 1.1 %             |
| 59Co (KED)  | 0.054 ppb             | 3.8 %             |
| 63Cu (KED)  | 2.311 ppb             | 1.3 %             |
| 64Zn (KED)  | 48.032 ppb            | 0.3 %             |
| 69Ga (KED)  | 0.520 ppb             | 4.9 %             |
| 75As (KED)  | 0.065 ppb             | 30.1 %            |
| 80Se (KED)  | 0.310 ppb             | 13.1 %            |
| 85Rb (KED)  | 0.960 ppb             | 3.8 %             |
| 88Sr (KED)  | 3.448 ppb             | 1.1 %             |
| 89Y (KED)   | 109.943 %             | 1.4 %             |
| 107Ag (KED) | 0.186 ppb             | 2.8 %             |
| 114Cd (KED) | 0.020 ppb             | 11.3 %            |
| 115In (KED) | 107.592 %             | 1.2 %             |
| 133Cs (KED) | 0.017 ppb             | 11.1 %            |
| 138Ba (KED) | 1.717 ppb             | 3.6 %             |
| 139La (KED) | 0.110 ppb             | 3.0 %             |
| 140Ce (KED) | 0.214 ppb             | 3.0 %             |
| 141Pr (KED) | 0.025 ppb             | 3.6 %             |
| 142Nd (KED) | 0.132 ppb             | 2.9 %             |
| 152Sm (KED) | 0.017 ppb             | 5.3 %             |
| 153Eu (KED) | 0.003 ppb             | 6.7 %             |
| 158Gd (KED) | 0.015 ppb             | 12.8 %            |
| 159Tb (KED) | 116.610 %             | 1.4 %             |
| 164Dy (KED) | 0.011 ppb             | 4.3 %             |
| 166Er (KED) | 0.001 ppb             | 12.8 %            |
| 169Tm (KED) | 0.001 ppb             | 20.1 %            |
| 174Yb (KED) | 0.004 ppb             | 3.0 %             |
| 175Lu (KED) | -0.126 ppb            | 3.3 %             |
| 205Tl (KED) | 0.002 ppb             | 7.0 %             |
| 208Pb (KED) | 0.395 ppb             | 1.7 %             |
| 209Bi (KED) | 103.731 %             | 1.0 %             |
| 232Th (KED) | 0.026 ppb             | 3.1 %             |
| 238U (KED)  | 0.009 ppb             | 1.3 %             |

| Category   | Concentration average | Intensity average | Intensity RSD |
|------------|-----------------------|-------------------|---------------|
| 6Li (KED)  | 115.347 %             | 3,458 cps         | 3.0 %         |
| 9Be (KED)  | 0.011 ppb             | 2 cps             | 173.2 %       |
| 11B (KED)  | 2.719 ppb             | 833 cps           | 11.3 %        |
| 24Mg (KED) | 157.944 ppb           | 101,131 cps       | 1.2 %         |
| 27Al (KED) | 97.760 ppb            | 15,365 cps        | 1.9 %         |

| Category    | Concentration average | Intensity average | Intensity RSD |
|-------------|-----------------------|-------------------|---------------|
| 45Sc (KED)  | 115.003 %             | 53,899 cps        | 1.1 %         |
| 51V (KED)   | 0.176 ppb             | 1,652 cps         | 4.3 %         |
| 52Cr (KED)  | 0.471 ppb             | 7,031 cps         | 1.3 %         |
| 55Mn (KED)  | 3.186 ppb             | 23,960 cps        | 1.0 %         |
| 56Fe (KED)  | 115.513 ppb           | 1,575,586 cps     | 1.0 %         |
| 58Ni (KED)  | 0.627 ppb             | 11,485 cps        | 1.2 %         |
| 59Co (KED)  | 0.054 ppb             | 1,580 cps         | 2.7 %         |
| 63Cu (KED)  | 2.311 ppb             | 59,161 cps        | 0.8 %         |
| 64Zn (KED)  | 48.032 ppb            | 316,987 cps       | 1.4 %         |
| 69Ga (KED)  | 0.520 ppb             | 3,696 cps         | 3.4 %         |
| 75As (KED)  | 0.065 ppb             | 132 cps           | 26.5 %        |
| 80Se (KED)  | 0.310 ppb             | 1,329 cps         | 1.6 %         |
| 85Rb (KED)  | 0.960 ppb             | 6,235 cps         | 4.6 %         |
| 88Sr (KED)  | 3.448 ppb             | 31,554 cps        | 0.4 %         |
| 89Y (KED)   | 109.943 %             | 472,907 cps       | 1.4 %         |
| 107Ag (KED) | 0.186 ppb             | 10,858 cps        | 2.4 %         |
| 114Cd (KED) | 0.020 ppb             | 541 cps           | 10.3 %        |
| 115In (KED) | 107.592 %             | 869,008 cps       | 1.2 %         |
| 133Cs (KED) | 0.017 ppb             | 543 cps           | 11.7 %        |
| 138Ba (KED) | 1.717 ppb             | 80,601 cps        | 2.4 %         |
| 139La (KED) | 0.110 ppb             | 10,949 cps        | 3.0 %         |
| 140Ce (KED) | 0.214 ppb             | 28,942 cps        | 1.8 %         |
| 141Pr (KED) | 0.025 ppb             | 3,498 cps         | 2.2 %         |
| 142Nd (KED) | 0.132 ppb             | 7,378 cps         | 2.2 %         |
| 152Sm (KED) | 0.017 ppb             | 889 cps           | 5.7 %         |
| 153Eu (KED) | 0.003 ppb             | 376 cps           | 7.5 %         |
| 158Gd (KED) | 0.015 ppb             | 1,000 cps         | 11.1 %        |
| 159Tb (KED) | 116.610 %             | 4,719,739 cps     | 1.4 %         |
| 164Dy (KED) | 0.011 ppb             | 854 cps           | 3.2 %         |
| 166Er (KED) | 0.001 ppb             | 752 cps           | 1.8 %         |
| 169Tm (KED) | 0.001 ppb             | 207 cps           | 14.8 %        |
| 174Yb (KED) | 0.004 ppb             | 471 cps           | 2.5 %         |
| 175Lu (KED) | -0.126 ppb            | 19,399 cps        | 3.1 %         |
| 205Tl (KED) | 0.002 ppb             | 441 cps           | 7.2 %         |
| 208Pb (KED) | 0.395 ppb             | 62,326 cps        | 1.3 %         |
| 209Bi (KED) | 103.731 %             | 3,830,854 cps     | 1.0 %         |
| 232Th (KED) | 0.026 ppb             | 7,269 cps         | 2.0 %         |
| 238U (KED)  | 0.009 ppb             | 3,137 cps         | 1.0 %         |

## Sample Summary

Instrument ID: iCAP Q

Analysis index: 17

Analysis name: w123ti

Analysis started at: 10/18/2021 4:01:57 PM

User name: WINDOWS-UPCI4ER\Administrator

| Category    | Concentration average | Concentration RSD |
|-------------|-----------------------|-------------------|
| 6Li (KED)   | 114.123 %             | 2.5 %             |
| 9Be (KED)   | 0.012 ppb             | 86.7 %            |
| 11B (KED)   | 6.925 ppb             | 16.2 %            |
| 24Mg (KED)  | 249.424 ppb           | 2.5 %             |
| 27Al (KED)  | 165.351 ppb           | 0.8 %             |
| 45Sc (KED)  | 116.522 %             | 1.4 %             |
| 51V (KED)   | 0.298 ppb             | 3.4 %             |
| 52Cr (KED)  | 0.614 ppb             | 1.7 %             |
| 55Mn (KED)  | 6.077 ppb             | 0.5 %             |
| 56Fe (KED)  | 197.502 ppb           | 2.5 %             |
| 58Ni (KED)  | 1.053 ppb             | 1.4 %             |
| 59Co (KED)  | 0.093 ppb             | 4.8 %             |
| 63Cu (KED)  | 2.364 ppb             | 2.4 %             |
| 64Zn (KED)  | 56.998 ppb            | 1.0 %             |
| 69Ga (KED)  | 0.814 ppb             | 3.5 %             |
| 75As (KED)  | 0.104 ppb             | 11.5 %            |
| 80Se (KED)  | 0.325 ppb             | 49.3 %            |
| 85Rb (KED)  | 1.389 ppb             | 1.5 %             |
| 88Sr (KED)  | 5.177 ppb             | 2.6 %             |
| 89Y (KED)   | 110.403 %             | 1.3 %             |
| 107Ag (KED) | 0.051 ppb             | 4.8 %             |
| 114Cd (KED) | 0.007 ppb             | 9.2 %             |
| 115In (KED) | 108.232 %             | 1.2 %             |
| 133Cs (KED) | 0.035 ppb             | 5.7 %             |
| 138Ba (KED) | 2.643 ppb             | 2.5 %             |
| 139La (KED) | 0.234 ppb             | 0.3 %             |
| 140Ce (KED) | 0.433 ppb             | 2.8 %             |
| 141Pr (KED) | 0.050 ppb             | 3.6 %             |
| 142Nd (KED) | 0.265 ppb             | 1.6 %             |
| 152Sm (KED) | 0.035 ppb             | 3.3 %             |
| 153Eu (KED) | 0.005 ppb             | 12.5 %            |
| 158Gd (KED) | 0.029 ppb             | 6.5 %             |
| 159Tb (KED) | 114.745 %             | 1.3 %             |
| 164Dy (KED) | 0.020 ppb             | 2.6 %             |
| 166Er (KED) | 0.005 ppb             | 16.0 %            |
| 169Tm (KED) | 0.001 ppb             | 6.6 %             |
| 174Yb (KED) | 0.008 ppb             | 5.7 %             |
| 175Lu (KED) | -0.124 ppb            | 0.7 %             |
| 205Tl (KED) | 0.004 ppb             | 2.6 %             |
| 208Pb (KED) | 0.289 ppb             | 1.3 %             |
| 209Bi (KED) | 101.733 %             | 0.4 %             |
| 232Th (KED) | 0.042 ppb             | 2.1 %             |
| 238U (KED)  | 0.010 ppb             | 1.0 %             |

| Category   | Concentration average | Intensity average | Intensity RSD |
|------------|-----------------------|-------------------|---------------|
| 6Li (KED)  | 114.123 %             | 3,422 cps         | 2.5 %         |
| 9Be (KED)  | 0.012 ppb             | 2 cps             | 86.6 %        |
| 11B (KED)  | 6.925 ppb             | 1,259 cps         | 6.6 %         |
| 24Mg (KED) | 249.424 ppb           | 157,944 cps       | 0.5 %         |
| 27Al (KED) | 165.351 ppb           | 26,287 cps        | 1.3 %         |

| Category    | Concentration average | Intensity average | Intensity RSD |
|-------------|-----------------------|-------------------|---------------|
| 45Sc (KED)  | 116.522 %             | 54,611 cps        | 1.4 %         |
| 51V (KED)   | 0.298 ppb             | 2,831 cps         | 4.7 %         |
| 52Cr (KED)  | 0.614 ppb             | 9,259 cps         | 0.8 %         |
| 55Mn (KED)  | 6.077 ppb             | 46,257 cps        | 1.0 %         |
| 56Fe (KED)  | 197.502 ppb           | 2,727,268 cps     | 1.2 %         |
| 58Ni (KED)  | 1.053 ppb             | 19,342 cps        | 0.4 %         |
| 59Co (KED)  | 0.093 ppb             | 2,763 cps         | 5.3 %         |
| 63Cu (KED)  | 2.364 ppb             | 60,539 cps        | 0.8 %         |
| 64Zn (KED)  | 56.998 ppb            | 377,011 cps       | 0.4 %         |
| 69Ga (KED)  | 0.814 ppb             | 5,771 cps         | 4.4 %         |
| 75As (KED)  | 0.104 ppb             | 202 cps           | 9.9 %         |
| 80Se (KED)  | 0.325 ppb             | 1,345 cps         | 8.4 %         |
| 85Rb (KED)  | 1.389 ppb             | 9,053 cps         | 2.5 %         |
| 88Sr (KED)  | 5.177 ppb             | 47,520 cps        | 2.6 %         |
| 89Y (KED)   | 110.403 %             | 474,886 cps       | 1.3 %         |
| 107Ag (KED) | 0.051 ppb             | 3,024 cps         | 5.9 %         |
| 114Cd (KED) | 0.007 ppb             | 248 cps           | 5.4 %         |
| 115In (KED) | 108.232 %             | 874,177 cps       | 1.2 %         |
| 133Cs (KED) | 0.035 ppb             | 1,134 cps         | 5.2 %         |
| 138Ba (KED) | 2.643 ppb             | 121,205 cps       | 1.3 %         |
| 139La (KED) | 0.234 ppb             | 22,988 cps        | 1.2 %         |
| 140Ce (KED) | 0.433 ppb             | 57,330 cps        | 1.8 %         |
| 141Pr (KED) | 0.050 ppb             | 6,919 cps         | 2.6 %         |
| 142Nd (KED) | 0.265 ppb             | 14,548 cps        | 1.3 %         |
| 152Sm (KED) | 0.035 ppb             | 1,745 cps         | 3.4 %         |
| 153Eu (KED) | 0.005 ppb             | 558 cps           | 10.6 %        |
| 158Gd (KED) | 0.029 ppb             | 1,915 cps         | 5.2 %         |
| 159Tb (KED) | 114.745 %             | 4,644,265 cps     | 1.3 %         |
| 164Dy (KED) | 0.020 ppb             | 1,488 cps         | 3.5 %         |
| 166Er (KED) | 0.005 ppb             | 1,090 cps         | 6.1 %         |
| 169Tm (KED) | 0.001 ppb             | 387 cps           | 5.4 %         |
| 174Yb (KED) | 0.008 ppb             | 841 cps           | 4.4 %         |
| 175Lu (KED) | -0.124 ppb            | 19,503 cps        | 1.8 %         |
| 205Tl (KED) | 0.004 ppb             | 709 cps           | 2.4 %         |
| 208Pb (KED) | 0.289 ppb             | 46,795 cps        | 1.0 %         |
| 209Bi (KED) | 101.733 %             | 3,757,066 cps     | 0.4 %         |
| 232Th (KED) | 0.042 ppb             | 11,386 cps        | 1.6 %         |
| 238U (KED)  | 0.010 ppb             | 3,365 cps         | 1.2 %         |

## Sample Summary

Instrument ID: iCAP Q

Analysis index: 18

Analysis name: 191055ti

Analysis started at: 10/18/2021 4:06:10 PM

User name: WINDOWS-UPCI4ER\Administrator

| Category    | Concentration average | Concentration RSD |
|-------------|-----------------------|-------------------|
| 6Li (KED)   | 114.346 %             | 1.5 %             |
| 9Be (KED)   | 0.000 ppb             |                   |
| 11B (KED)   | 3.807 ppb             | 7.4 %             |
| 24Mg (KED)  | 133.623 ppb           | 2.1 %             |
| 27Al (KED)  | 95.947 ppb            | 2.5 %             |
| 45Sc (KED)  | 114.825 %             | 2.8 %             |
| 51V (KED)   | 0.174 ppb             | 4.7 %             |
| 52Cr (KED)  | 0.532 ppb             | 5.3 %             |
| 55Mn (KED)  | 3.560 ppb             | 1.5 %             |
| 56Fe (KED)  | 120.146 ppb           | 1.5 %             |
| 58Ni (KED)  | 0.691 ppb             | 4.0 %             |
| 59Co (KED)  | 0.053 ppb             | 10.3 %            |
| 63Cu (KED)  | 1.888 ppb             | 1.6 %             |
| 64Zn (KED)  | 49.173 ppb            | 1.0 %             |
| 69Ga (KED)  | 0.490 ppb             | 3.0 %             |
| 75As (KED)  | 0.060 ppb             | 19.0 %            |
| 80Se (KED)  | 0.426 ppb             | 10.7 %            |
| 85Rb (KED)  | 0.676 ppb             | 0.7 %             |
| 88Sr (KED)  | 2.928 ppb             | 1.6 %             |
| 89Y (KED)   | 110.508 %             | 0.9 %             |
| 107Ag (KED) | 0.013 ppb             | 11.3 %            |
| 114Cd (KED) | 0.006 ppb             | 18.8 %            |
| 115In (KED) | 107.441 %             | 0.2 %             |
| 133Cs (KED) | 0.020 ppb             | 5.5 %             |
| 138Ba (KED) | 1.642 ppb             | 3.4 %             |
| 139La (KED) | 0.093 ppb             | 4.7 %             |
| 140Ce (KED) | 0.189 ppb             | 3.6 %             |
| 141Pr (KED) | 0.023 ppb             | 6.4 %             |
| 142Nd (KED) | 0.119 ppb             | 3.9 %             |
| 152Sm (KED) | 0.016 ppb             | 7.6 %             |
| 153Eu (KED) | 0.004 ppb             | 8.0 %             |
| 158Gd (KED) | 0.015 ppb             | 7.2 %             |
| 159Tb (KED) | 111.172 %             | 2.5 %             |
| 164Dy (KED) | 0.010 ppb             | 11.7 %            |
| 166Er (KED) | 0.001 ppb             | 36.2 %            |
| 169Tm (KED) | 0.001 ppb             | 18.2 %            |
| 174Yb (KED) | 0.004 ppb             | 1.4 %             |
| 175Lu (KED) | -0.123 ppb            | 4.8 %             |
| 205Tl (KED) | 0.002 ppb             | 6.2 %             |
| 208Pb (KED) | 0.214 ppb             | 4.2 %             |
| 209Bi (KED) | 102.800 %             | 1.3 %             |
| 232Th (KED) | 0.025 ppb             | 2.9 %             |
| 238U (KED)  | 0.006 ppb             | 9.1 %             |

| Category   | Concentration average | Intensity average | Intensity RSD |
|------------|-----------------------|-------------------|---------------|
| 6Li (KED)  | 114.346 %             | 3,428 cps         | 1.5 %         |
| 9Be (KED)  | 0.000 ppb             | 0 cps             |               |
| 11B (KED)  | 3.807 ppb             | 941 cps           | 4.6 %         |
| 24Mg (KED) | 133.623 ppb           | 84,850 cps        | 0.6 %         |
| 27Al (KED) | 95.947 ppb            | 15,052 cps        | 1.1 %         |

| Category    | Concentration average | Intensity average | Intensity RSD |
|-------------|-----------------------|-------------------|---------------|
| 45Sc (KED)  | 114.825 %             | 53,816 cps        | 2.8 %         |
| 51V (KED)   | 0.174 ppb             | 1,630 cps         | 2.5 %         |
| 52Cr (KED)  | 0.532 ppb             | 7,910 cps         | 3.5 %         |
| 55Mn (KED)  | 3.560 ppb             | 26,716 cps        | 1.7 %         |
| 56Fe (KED)  | 120.146 ppb           | 1,635,705 cps     | 1.5 %         |
| 58Ni (KED)  | 0.691 ppb             | 12,604 cps        | 2.8 %         |
| 59Co (KED)  | 0.053 ppb             | 1,543 cps         | 7.3 %         |
| 63Cu (KED)  | 1.888 ppb             | 50,465 cps        | 2.2 %         |
| 64Zn (KED)  | 49.173 ppb            | 326,082 cps       | 1.0 %         |
| 69Ga (KED)  | 0.490 ppb             | 3,505 cps         | 2.2 %         |
| 75As (KED)  | 0.060 ppb             | 124 cps           | 17.2 %        |
| 80Se (KED)  | 0.426 ppb             | 1,407 cps         | 2.5 %         |
| 85Rb (KED)  | 0.676 ppb             | 4,420 cps         | 0.8 %         |
| 88Sr (KED)  | 2.928 ppb             | 26,950 cps        | 1.7 %         |
| 89Y (KED)   | 110.508 %             | 475,334 cps       | 0.9 %         |
| 107Ag (KED) | 0.013 ppb             | 809 cps           | 10.5 %        |
| 114Cd (KED) | 0.006 ppb             | 226 cps           | 11.2 %        |
| 115In (KED) | 107.441 %             | 867,789 cps       | 0.2 %         |
| 133Cs (KED) | 0.020 ppb             | 641 cps           | 5.3 %         |
| 138Ba (KED) | 1.642 ppb             | 73,528 cps        | 0.8 %         |
| 139La (KED) | 0.093 ppb             | 8,828 cps         | 3.2 %         |
| 140Ce (KED) | 0.189 ppb             | 24,409 cps        | 1.3 %         |
| 141Pr (KED) | 0.023 ppb             | 3,126 cps         | 8.2 %         |
| 142Nd (KED) | 0.119 ppb             | 6,335 cps         | 2.4 %         |
| 152Sm (KED) | 0.016 ppb             | 757 cps           | 6.4 %         |
| 153Eu (KED) | 0.004 ppb             | 387 cps           | 8.7 %         |
| 158Gd (KED) | 0.015 ppb             | 992 cps           | 4.6 %         |
| 159Tb (KED) | 111.172 %             | 4,499,650 cps     | 2.5 %         |
| 164Dy (KED) | 0.010 ppb             | 736 cps           | 11.3 %        |
| 166Er (KED) | 0.001 ppb             | 678 cps           | 6.4 %         |
| 169Tm (KED) | 0.001 ppb             | 202 cps           | 14.2 %        |
| 174Yb (KED) | 0.004 ppb             | 416 cps           | 3.8 %         |
| 175Lu (KED) | -0.123 ppb            | 18,977 cps        | 3.4 %         |
| 205Tl (KED) | 0.002 ppb             | 451 cps           | 5.5 %         |
| 208Pb (KED) | 0.214 ppb             | 36,940 cps        | 2.1 %         |
| 209Bi (KED) | 102.800 %             | 3,796,476 cps     | 1.3 %         |
| 232Th (KED) | 0.025 ppb             | 7,016 cps         | 2.0 %         |
| 238U (KED)  | 0.006 ppb             | 2,058 cps         | 7.8 %         |

## Sample Summary

Instrument ID: iCAP Q

Analysis index: 19

Analysis name: 191064ti

Analysis started at: 10/18/2021 4:10:22 PM

User name: WINDOWS-UPCI4ER\Administrator

| Category    | Concentration average | Concentration RSD |
|-------------|-----------------------|-------------------|
| 6Li (KED)   | 112.455 %             | 3.5 %             |
| 9Be (KED)   | 0.000 ppb             |                   |
| 11B (KED)   | 4.916 ppb             | 12.6 %            |
| 24Mg (KED)  | 97.168 ppb            | 3.7 %             |
| 27Al (KED)  | 56.934 ppb            | 2.1 %             |
| 45Sc (KED)  | 113.924 %             | 0.2 %             |
| 51V (KED)   | 0.099 ppb             | 9.0 %             |
| 52Cr (KED)  | 0.313 ppb             | 4.3 %             |
| 55Mn (KED)  | 2.139 ppb             | 0.9 %             |
| 56Fe (KED)  | 71.961 ppb            | 0.3 %             |
| 58Ni (KED)  | 0.723 ppb             | 2.1 %             |
| 59Co (KED)  | 0.043 ppb             | 3.5 %             |
| 63Cu (KED)  | 1.482 ppb             | 2.3 %             |
| 64Zn (KED)  | 53.215 ppb            | 2.1 %             |
| 69Ga (KED)  | 0.309 ppb             | 1.6 %             |
| 75As (KED)  | 0.069 ppb             | 42.3 %            |
| 80Se (KED)  | 0.574 ppb             | 14.2 %            |
| 85Rb (KED)  | 0.822 ppb             | 5.5 %             |
| 88Sr (KED)  | 1.869 ppb             | 3.2 %             |
| 89Y (KED)   | 109.350 %             | 1.1 %             |
| 107Ag (KED) | 0.010 ppb             | 11.2 %            |
| 114Cd (KED) | 0.011 ppb             | 4.7 %             |
| 115In (KED) | 104.815 %             | 0.2 %             |
| 133Cs (KED) | 0.011 ppb             | 8.8 %             |
| 138Ba (KED) | 1.035 ppb             | 2.4 %             |
| 139La (KED) | 0.067 ppb             | 4.1 %             |
| 140Ce (KED) | 0.139 ppb             | 1.5 %             |
| 141Pr (KED) | 0.015 ppb             | 8.1 %             |
| 142Nd (KED) | 0.087 ppb             | 2.3 %             |
| 152Sm (KED) | 0.011 ppb             | 10.0 %            |
| 153Eu (KED) | 0.002 ppb             | 30.0 %            |
| 158Gd (KED) | 0.010 ppb             | 10.8 %            |
| 159Tb (KED) | 110.374 %             | 2.0 %             |
| 164Dy (KED) | 0.006 ppb             | 10.0 %            |
| 166Er (KED) | -0.001 ppb            | 52.4 %            |
| 169Tm (KED) | 0.000 ppb             | 40.9 %            |
| 174Yb (KED) | 0.002 ppb             | 8.8 %             |
| 175Lu (KED) | -0.126 ppb            | 1.8 %             |
| 205Tl (KED) | 0.002 ppb             | 12.9 %            |
| 208Pb (KED) | 0.149 ppb             | 2.7 %             |
| 209Bi (KED) | 100.551 %             | 0.6 %             |
| 232Th (KED) | 0.020 ppb             | 4.1 %             |
| 238U (KED)  | 0.004 ppb             | 5.5 %             |

| Category   | Concentration average | Intensity average | Intensity RSD |
|------------|-----------------------|-------------------|---------------|
| 6Li (KED)  | 112.455 %             | 3,372 cps         | 3.5 %         |
| 9Be (KED)  | 0.000 ppb             | 0 cps             |               |
| 11B (KED)  | 4.916 ppb             | 1,037 cps         | 2.6 %         |
| 24Mg (KED) | 97.168 ppb            | 60,672 cps        | 0.8 %         |
| 27Al (KED) | 56.934 ppb            | 8,892 cps         | 2.0 %         |

| Category    | Concentration average | Intensity average | Intensity RSD |
|-------------|-----------------------|-------------------|---------------|
| 45Sc (KED)  | 113.924 %             | 53,394 cps        | 0.2 %         |
| 51V (KED)   | 0.099 ppb             | 926 cps           | 8.9 %         |
| 52Cr (KED)  | 0.313 ppb             | 4,654 cps         | 4.1 %         |
| 55Mn (KED)  | 2.139 ppb             | 15,947 cps        | 0.8 %         |
| 56Fe (KED)  | 71.961 ppb            | 973,182 cps       | 0.4 %         |
| 58Ni (KED)  | 0.723 ppb             | 13,078 cps        | 1.9 %         |
| 59Co (KED)  | 0.043 ppb             | 1,269 cps         | 3.4 %         |
| 63Cu (KED)  | 1.482 ppb             | 41,360 cps        | 0.6 %         |
| 64Zn (KED)  | 53.215 ppb            | 348,843 cps       | 1.0 %         |
| 69Ga (KED)  | 0.309 ppb             | 2,216 cps         | 2.7 %         |
| 75As (KED)  | 0.069 ppb             | 139 cps           | 37.2 %        |
| 80Se (KED)  | 0.574 ppb             | 1,480 cps         | 2.2 %         |
| 85Rb (KED)  | 0.822 ppb             | 5,310 cps         | 6.2 %         |
| 88Sr (KED)  | 1.869 ppb             | 17,058 cps        | 2.2 %         |
| 89Y (KED)   | 109.350 %             | 470,353 cps       | 1.1 %         |
| 107Ag (KED) | 0.010 ppb             | 620 cps           | 10.3 %        |
| 114Cd (KED) | 0.011 ppb             | 328 cps           | 3.3 %         |
| 115In (KED) | 104.815 %             | 846,576 cps       | 0.2 %         |
| 133Cs (KED) | 0.011 ppb             | 357 cps           | 8.3 %         |
| 138Ba (KED) | 1.035 ppb             | 46,569 cps        | 0.6 %         |
| 139La (KED) | 0.067 ppb             | 6,323 cps         | 3.9 %         |
| 140Ce (KED) | 0.139 ppb             | 18,009 cps        | 2.4 %         |
| 141Pr (KED) | 0.015 ppb             | 2,071 cps         | 5.9 %         |
| 142Nd (KED) | 0.087 ppb             | 4,630 cps         | 0.3 %         |
| 152Sm (KED) | 0.011 ppb             | 547 cps           | 11.6 %        |
| 153Eu (KED) | 0.002 ppb             | 196 cps           | 27.4 %        |
| 158Gd (KED) | 0.010 ppb             | 638 cps           | 10.2 %        |
| 159Tb (KED) | 110.374 %             | 4,467,344 cps     | 2.0 %         |
| 164Dy (KED) | 0.006 ppb             | 470 cps           | 10.4 %        |
| 166Er (KED) | -0.001 ppb            | 480 cps           | 12.5 %        |
| 169Tm (KED) | 0.000 ppb             | 106 cps           | 25.7 %        |
| 174Yb (KED) | 0.002 ppb             | 267 cps           | 5.7 %         |
| 175Lu (KED) | -0.126 ppb            | 18,321 cps        | 3.0 %         |
| 205Tl (KED) | 0.002 ppb             | 436 cps           | 12.4 %        |
| 208Pb (KED) | 0.149 ppb             | 27,488 cps        | 1.4 %         |
| 209Bi (KED) | 100.551 %             | 3,713,424 cps     | 0.6 %         |
| 232Th (KED) | 0.020 ppb             | 5,537 cps         | 3.4 %         |
| 238U (KED)  | 0.004 ppb             | 1,441 cps         | 4.5 %         |

## Sample Summary

Instrument ID: iCAP Q

Analysis index: 20

Analysis name: w117ti

Analysis started at: 10/18/2021 4:14:31 PM

User name: WINDOWS-UPCI4ER\Administrator

| Category    | Concentration average | Concentration RSD |
|-------------|-----------------------|-------------------|
| 6Li (KED)   | 109.749 %             | 1.6 %             |
| 9Be (KED)   | 0.012 ppb             | 86.6 %            |
| 11B (KED)   | 2.087 ppb             | 8.8 %             |
| 24Mg (KED)  | 333.414 ppb           | 3.2 %             |
| 27Al (KED)  | 208.339 ppb           | 1.8 %             |
| 45Sc (KED)  | 117.136 %             | 0.7 %             |
| 51V (KED)   | 0.390 ppb             | 2.3 %             |
| 52Cr (KED)  | 0.707 ppb             | 0.3 %             |
| 55Mn (KED)  | 8.279 ppb             | 0.7 %             |
| 56Fe (KED)  | 252.750 ppb           | 1.7 %             |
| 58Ni (KED)  | 1.179 ppb             | 0.7 %             |
| 59Co (KED)  | 0.118 ppb             | 4.2 %             |
| 63Cu (KED)  | 3.380 ppb             | 1.5 %             |
| 64Zn (KED)  | 49.594 ppb            | 1.9 %             |
| 69Ga (KED)  | 0.977 ppb             | 1.7 %             |
| 75As (KED)  | 0.135 ppb             | 21.6 %            |
| 80Se (KED)  | 0.386 ppb             | 19.3 %            |
| 85Rb (KED)  | 1.850 ppb             | 2.1 %             |
| 88Sr (KED)  | 7.409 ppb             | 1.3 %             |
| 89Y (KED)   | 111.304 %             | 1.2 %             |
| 107Ag (KED) | 0.013 ppb             | 8.2 %             |
| 114Cd (KED) | 0.007 ppb             | 24.4 %            |
| 115In (KED) | 107.016 %             | 0.4 %             |
| 133Cs (KED) | 0.046 ppb             | 2.0 %             |
| 138Ba (KED) | 3.313 ppb             | 0.9 %             |
| 139La (KED) | 0.235 ppb             | 2.1 %             |
| 140Ce (KED) | 0.459 ppb             | 3.2 %             |
| 141Pr (KED) | 0.055 ppb             | 2.2 %             |
| 142Nd (KED) | 0.296 ppb             | 3.4 %             |
| 152Sm (KED) | 0.040 ppb             | 0.9 %             |
| 153Eu (KED) | 0.008 ppb             | 10.2 %            |
| 158Gd (KED) | 0.034 ppb             | 3.0 %             |
| 159Tb (KED) | 114.462 %             | 2.5 %             |
| 164Dy (KED) | 0.024 ppb             | 6.4 %             |
| 166Er (KED) | 0.007 ppb             | 18.7 %            |
| 169Tm (KED) | 0.001 ppb             | 18.2 %            |
| 174Yb (KED) | 0.009 ppb             | 6.5 %             |
| 175Lu (KED) | -0.129 ppb            | 1.7 %             |
| 205Tl (KED) | 0.004 ppb             | 0.7 %             |
| 208Pb (KED) | 0.343 ppb             | 1.6 %             |
| 209Bi (KED) | 100.327 %             | 0.8 %             |
| 232Th (KED) | 0.052 ppb             | 2.1 %             |
| 238U (KED)  | 0.013 ppb             | 1.6 %             |

| Category   | Concentration average | Intensity average | Intensity RSD |
|------------|-----------------------|-------------------|---------------|
| 6Li (KED)  | 109.749 %             | 3,290 cps         | 1.6 %         |
| 9Be (KED)  | 0.012 ppb             | 2 cps             | 86.6 %        |
| 11B (KED)  | 2.087 ppb             | 732 cps           | 1.4 %         |
| 24Mg (KED) | 333.414 ppb           | 203,012 cps       | 1.6 %         |
| 27Al (KED) | 208.339 ppb           | 33,279 cps        | 2.0 %         |

| Category    | Concentration average | Intensity average | Intensity RSD |
|-------------|-----------------------|-------------------|---------------|
| 45Sc (KED)  | 117.136 %             | 54,899 cps        | 0.7 %         |
| 51V (KED)   | 0.390 ppb             | 3,725 cps         | 2.3 %         |
| 52Cr (KED)  | 0.707 ppb             | 10,697 cps        | 0.5 %         |
| 55Mn (KED)  | 8.279 ppb             | 63,338 cps        | 0.1 %         |
| 56Fe (KED)  | 252.750 ppb           | 3,508,468 cps     | 1.0 %         |
| 58Ni (KED)  | 1.179 ppb             | 21,726 cps        | 0.5 %         |
| 59Co (KED)  | 0.118 ppb             | 3,497 cps         | 4.4 %         |
| 63Cu (KED)  | 3.380 ppb             | 82,823 cps        | 0.7 %         |
| 64Zn (KED)  | 49.594 ppb            | 331,178 cps       | 0.7 %         |
| 69Ga (KED)  | 0.977 ppb             | 6,963 cps         | 1.2 %         |
| 75As (KED)  | 0.135 ppb             | 259 cps           | 20.8 %        |
| 80Se (KED)  | 0.386 ppb             | 1,392 cps         | 4.2 %         |
| 85Rb (KED)  | 1.850 ppb             | 12,149 cps        | 1.2 %         |
| 88Sr (KED)  | 7.409 ppb             | 68,507 cps        | 0.2 %         |
| 89Y (KED)   | 111.304 %             | 478,758 cps       | 1.2 %         |
| 107Ag (KED) | 0.013 ppb             | 786 cps           | 7.6 %         |
| 114Cd (KED) | 0.007 ppb             | 260 cps           | 16.0 %        |
| 115In (KED) | 107.016 %             | 864,358 cps       | 0.4 %         |
| 133Cs (KED) | 0.046 ppb             | 1,475 cps         | 1.9 %         |
| 138Ba (KED) | 3.313 ppb             | 151,204 cps       | 1.6 %         |
| 139La (KED) | 0.235 ppb             | 22,980 cps        | 1.6 %         |
| 140Ce (KED) | 0.459 ppb             | 60,541 cps        | 0.7 %         |
| 141Pr (KED) | 0.055 ppb             | 7,559 cps         | 1.1 %         |
| 142Nd (KED) | 0.296 ppb             | 16,188 cps        | 1.4 %         |
| 152Sm (KED) | 0.040 ppb             | 1,989 cps         | 2.4 %         |
| 153Eu (KED) | 0.008 ppb             | 822 cps           | 12.3 %        |
| 158Gd (KED) | 0.034 ppb             | 2,236 cps         | 5.5 %         |
| 159Tb (KED) | 114.462 %             | 4,632,791 cps     | 2.5 %         |
| 164Dy (KED) | 0.024 ppb             | 1,766 cps         | 3.9 %         |
| 166Er (KED) | 0.007 ppb             | 1,265 cps         | 7.4 %         |
| 169Tm (KED) | 0.001 ppb             | 441 cps           | 15.3 %        |
| 174Yb (KED) | 0.009 ppb             | 997 cps           | 8.2 %         |
| 175Lu (KED) | -0.129 ppb            | 18,558 cps        | 1.9 %         |
| 205Tl (KED) | 0.004 ppb             | 769 cps           | 1.4 %         |
| 208Pb (KED) | 0.343 ppb             | 53,415 cps        | 1.2 %         |
| 209Bi (KED) | 100.327 %             | 3,705,138 cps     | 0.8 %         |
| 232Th (KED) | 0.052 ppb             | 13,946 cps        | 1.6 %         |
| 238U (KED)  | 0.013 ppb             | 4,293 cps         | 1.4 %         |

## Sample Summary

Instrument ID: iCAP Q

Analysis index: 21

Analysis name: w128ti

Analysis started at: 10/18/2021 4:18:39 PM

User name: WINDOWS-UPCI4ER\Administrator

| Category    | Concentration average | Concentration RSD |
|-------------|-----------------------|-------------------|
| 6Li (KED)   | 117.608 %             | 0.4 %             |
| 9Be (KED)   | 0.006 ppb             | 173.2 %           |
| 11B (KED)   | 1.154 ppb             | 10.5 %            |
| 24Mg (KED)  | 184.373 ppb           | 1.0 %             |
| 27Al (KED)  | 130.534 ppb           | 1.5 %             |
| 45Sc (KED)  | 118.403 %             | 1.2 %             |
| 51V (KED)   | 0.237 ppb             | 3.5 %             |
| 52Cr (KED)  | 0.494 ppb             | 4.8 %             |
| 55Mn (KED)  | 4.309 ppb             | 1.7 %             |
| 56Fe (KED)  | 148.249 ppb           | 1.0 %             |
| 58Ni (KED)  | 0.694 ppb             | 2.5 %             |
| 59Co (KED)  | 0.079 ppb             | 3.6 %             |
| 63Cu (KED)  | 2.931 ppb             | 2.3 %             |
| 64Zn (KED)  | 52.588 ppb            | 2.5 %             |
| 69Ga (KED)  | 0.612 ppb             | 1.9 %             |
| 75As (KED)  | 0.072 ppb             | 25.9 %            |
| 80Se (KED)  | 0.493 ppb             | 30.7 %            |
| 85Rb (KED)  | 1.126 ppb             | 0.8 %             |
| 88Sr (KED)  | 3.573 ppb             | 2.6 %             |
| 89Y (KED)   | 112.616 %             | 1.9 %             |
| 107Ag (KED) | 0.011 ppb             | 13.5 %            |
| 114Cd (KED) | 0.008 ppb             | 24.5 %            |
| 115In (KED) | 108.675 %             | 1.1 %             |
| 133Cs (KED) | 0.026 ppb             | 6.9 %             |
| 138Ba (KED) | 1.991 ppb             | 3.8 %             |
| 139La (KED) | 0.137 ppb             | 2.7 %             |
| 140Ce (KED) | 0.280 ppb             | 1.8 %             |
| 141Pr (KED) | 0.033 ppb             | 1.5 %             |
| 142Nd (KED) | 0.175 ppb             | 1.2 %             |
| 152Sm (KED) | 0.024 ppb             | 3.2 %             |
| 153Eu (KED) | 0.004 ppb             | 12.1 %            |
| 158Gd (KED) | 0.020 ppb             | 4.6 %             |
| 159Tb (KED) | 116.855 %             | 1.4 %             |
| 164Dy (KED) | 0.014 ppb             | 9.2 %             |
| 166Er (KED) | 0.002 ppb             | 64.0 %            |
| 169Tm (KED) | 0.001 ppb             | 15.8 %            |
| 174Yb (KED) | 0.005 ppb             | 1.8 %             |
| 175Lu (KED) | -0.129 ppb            | 4.1 %             |
| 205Tl (KED) | 0.002 ppb             | 8.3 %             |
| 208Pb (KED) | 0.213 ppb             | 3.2 %             |
| 209Bi (KED) | 102.336 %             | 0.4 %             |
| 232Th (KED) | 0.035 ppb             | 5.0 %             |
| 238U (KED)  | 0.009 ppb             | 2.6 %             |

| Category   | Concentration average | Intensity average | Intensity RSD |
|------------|-----------------------|-------------------|---------------|
| 6Li (KED)  | 117.608 %             | 3,526 cps         | 0.4 %         |
| 9Be (KED)  | 0.006 ppb             | 1 cps             | 173.2 %       |
| 11B (KED)  | 1.154 ppb             | 686 cps           | 2.2 %         |
| 24Mg (KED) | 184.373 ppb           | 120,398 cps       | 1.3 %         |
| 27Al (KED) | 130.534 ppb           | 21,099 cps        | 0.3 %         |

| Category    | Concentration average | Intensity average | Intensity RSD |
|-------------|-----------------------|-------------------|---------------|
| 45Sc (KED)  | 118.403 %             | 55,493 cps        | 1.2 %         |
| 51V (KED)   | 0.237 ppb             | 2,288 cps         | 3.9 %         |
| 52Cr (KED)  | 0.494 ppb             | 7,590 cps         | 3.7 %         |
| 55Mn (KED)  | 4.309 ppb             | 33,343 cps        | 1.6 %         |
| 56Fe (KED)  | 148.249 ppb           | 2,081,199 cps     | 1.4 %         |
| 58Ni (KED)  | 0.694 ppb             | 13,056 cps        | 1.6 %         |
| 59Co (KED)  | 0.079 ppb             | 2,375 cps         | 3.8 %         |
| 63Cu (KED)  | 2.931 ppb             | 74,040 cps        | 0.3 %         |
| 64Zn (KED)  | 52.588 ppb            | 355,022 cps       | 0.6 %         |
| 69Ga (KED)  | 0.612 ppb             | 4,444 cps         | 1.0 %         |
| 75As (KED)  | 0.072 ppb             | 148 cps           | 24.1 %        |
| 80Se (KED)  | 0.493 ppb             | 1,473 cps         | 4.5 %         |
| 85Rb (KED)  | 1.126 ppb             | 7,486 cps         | 1.3 %         |
| 88Sr (KED)  | 3.573 ppb             | 33,477 cps        | 0.8 %         |
| 89Y (KED)   | 112.616 %             | 484,404 cps       | 1.9 %         |
| 107Ag (KED) | 0.011 ppb             | 686 cps           | 13.5 %        |
| 114Cd (KED) | 0.008 ppb             | 272 cps           | 16.7 %        |
| 115In (KED) | 108.675 %             | 877,755 cps       | 1.1 %         |
| 133Cs (KED) | 0.026 ppb             | 858 cps           | 6.3 %         |
| 138Ba (KED) | 1.991 ppb             | 93,373 cps        | 3.1 %         |
| 139La (KED) | 0.137 ppb             | 13,725 cps        | 2.0 %         |
| 140Ce (KED) | 0.280 ppb             | 37,904 cps        | 0.5 %         |
| 141Pr (KED) | 0.033 ppb             | 4,631 cps         | 1.6 %         |
| 142Nd (KED) | 0.175 ppb             | 9,835 cps         | 2.5 %         |
| 152Sm (KED) | 0.024 ppb             | 1,237 cps         | 4.4 %         |
| 153Eu (KED) | 0.004 ppb             | 476 cps           | 9.9 %         |
| 158Gd (KED) | 0.020 ppb             | 1,375 cps         | 3.5 %         |
| 159Tb (KED) | 116.855 %             | 4,729,663 cps     | 1.4 %         |
| 164Dy (KED) | 0.014 ppb             | 1,071 cps         | 7.7 %         |
| 166Er (KED) | 0.002 ppb             | 802 cps           | 13.0 %        |
| 169Tm (KED) | 0.001 ppb             | 279 cps           | 14.3 %        |
| 174Yb (KED) | 0.005 ppb             | 581 cps           | 0.3 %         |
| 175Lu (KED) | -0.129 ppb            | 18,923 cps        | 4.7 %         |
| 205Tl (KED) | 0.002 ppb             | 454 cps           | 7.5 %         |
| 208Pb (KED) | 0.213 ppb             | 36,682 cps        | 2.1 %         |
| 209Bi (KED) | 102.336 %             | 3,779,322 cps     | 0.4 %         |
| 232Th (KED) | 0.035 ppb             | 9,600 cps         | 4.6 %         |
| 238U (KED)  | 0.009 ppb             | 3,079 cps         | 2.5 %         |

## Sample Summary

Instrument ID: iCAP Q

Analysis index: 22

Analysis name: w125ti

Analysis started at: 10/18/2021 4:22:50 PM

User name: WINDOWS-UPCI4ER\Administrator

| Category    | Concentration average | Concentration RSD |
|-------------|-----------------------|-------------------|
| 6Li (KED)   | 104.560 %             | 0.3 %             |
| 9Be (KED)   | 0.019 ppb             | 100.2 %           |
| 11B (KED)   | 2.943 ppb             | 31.2 %            |
| 24Mg (KED)  | 258.779 ppb           | 1.1 %             |
| 27Al (KED)  | 201.230 ppb           | 1.0 %             |
| 45Sc (KED)  | 107.523 %             | 0.2 %             |
| 51V (KED)   | 0.365 ppb             | 2.3 %             |
| 52Cr (KED)  | 0.767 ppb             | 0.8 %             |
| 55Mn (KED)  | 6.785 ppb             | 1.4 %             |
| 56Fe (KED)  | 264.469 ppb           | 1.2 %             |
| 58Ni (KED)  | 1.366 ppb             | 0.3 %             |
| 59Co (KED)  | 0.126 ppb             | 2.9 %             |
| 63Cu (KED)  | 2.257 ppb             | 2.8 %             |
| 64Zn (KED)  | 56.777 ppb            | 2.3 %             |
| 69Ga (KED)  | 0.949 ppb             | 2.6 %             |
| 75As (KED)  | 0.111 ppb             | 5.2 %             |
| 80Se (KED)  | 0.565 ppb             | 28.9 %            |
| 85Rb (KED)  | 1.122 ppb             | 0.7 %             |
| 88Sr (KED)  | 5.689 ppb             | 1.6 %             |
| 89Y (KED)   | 104.322 %             | 1.3 %             |
| 107Ag (KED) | 0.012 ppb             | 6.7 %             |
| 114Cd (KED) | 0.010 ppb             | 17.3 %            |
| 115In (KED) | 100.131 %             | 1.1 %             |
| 133Cs (KED) | 0.037 ppb             | 4.3 %             |
| 138Ba (KED) | 3.177 ppb             | 0.6 %             |
| 139La (KED) | 0.223 ppb             | 1.2 %             |
| 140Ce (KED) | 0.449 ppb             | 1.2 %             |
| 141Pr (KED) | 0.052 ppb             | 3.9 %             |
| 142Nd (KED) | 0.286 ppb             | 1.7 %             |
| 152Sm (KED) | 0.037 ppb             | 1.9 %             |
| 153Eu (KED) | 0.008 ppb             | 5.0 %             |
| 158Gd (KED) | 0.032 ppb             | 3.3 %             |
| 159Tb (KED) | 102.439 %             | 0.7 %             |
| 164Dy (KED) | 0.022 ppb             | 3.6 %             |
| 166Er (KED) | 0.008 ppb             | 3.6 %             |
| 169Tm (KED) | 0.001 ppb             | 9.8 %             |
| 174Yb (KED) | 0.009 ppb             | 10.2 %            |
| 175Lu (KED) | -0.122 ppb            | 1.2 %             |
| 205Tl (KED) | 0.003 ppb             | 8.9 %             |
| 208Pb (KED) | 0.383 ppb             | 2.4 %             |
| 209Bi (KED) | 93.664 %              | 2.3 %             |
| 232Th (KED) | 0.054 ppb             | 2.5 %             |
| 238U (KED)  | 0.013 ppb             | 4.4 %             |

| Category   | Concentration average | Intensity average | Intensity RSD |
|------------|-----------------------|-------------------|---------------|
| 6Li (KED)  | 104.560 %             | 3,135 cps         | 0.3 %         |
| 9Be (KED)  | 0.019 ppb             | 3 cps             | 100.0 %       |
| 11B (KED)  | 2.943 ppb             | 779 cps           | 11.5 %        |
| 24Mg (KED) | 258.779 ppb           | 150,188 cps       | 0.8 %         |
| 27Al (KED) | 201.230 ppb           | 29,507 cps        | 0.9 %         |

| Category    | Concentration average | Intensity average | Intensity RSD |
|-------------|-----------------------|-------------------|---------------|
| 45Sc (KED)  | 107.523 %             | 50,394 cps        | 0.2 %         |
| 51V (KED)   | 0.365 ppb             | 3,199 cps         | 2.2 %         |
| 52Cr (KED)  | 0.767 ppb             | 10,641 cps        | 0.8 %         |
| 55Mn (KED)  | 6.785 ppb             | 47,655 cps        | 1.2 %         |
| 56Fe (KED)  | 264.469 ppb           | 3,370,019 cps     | 1.3 %         |
| 58Ni (KED)  | 1.366 ppb             | 23,071 cps        | 0.2 %         |
| 59Co (KED)  | 0.126 ppb             | 3,420 cps         | 2.7 %         |
| 63Cu (KED)  | 2.257 ppb             | 55,034 cps        | 1.7 %         |
| 64Zn (KED)  | 56.777 ppb            | 354,860 cps       | 1.8 %         |
| 69Ga (KED)  | 0.949 ppb             | 6,342 cps         | 1.4 %         |
| 75As (KED)  | 0.111 ppb             | 203 cps           | 5.9 %         |
| 80Se (KED)  | 0.565 ppb             | 1,407 cps         | 5.9 %         |
| 85Rb (KED)  | 1.122 ppb             | 6,913 cps         | 2.0 %         |
| 88Sr (KED)  | 5.689 ppb             | 49,325 cps        | 1.1 %         |
| 89Y (KED)   | 104.322 %             | 448,727 cps       | 1.3 %         |
| 107Ag (KED) | 0.012 ppb             | 696 cps           | 5.3 %         |
| 114Cd (KED) | 0.010 ppb             | 287 cps           | 13.2 %        |
| 115In (KED) | 100.131 %             | 808,750 cps       | 1.1 %         |
| 133Cs (KED) | 0.037 ppb             | 1,102 cps         | 3.6 %         |
| 138Ba (KED) | 3.177 ppb             | 129,816 cps       | 1.3 %         |
| 139La (KED) | 0.223 ppb             | 19,535 cps        | 0.8 %         |
| 140Ce (KED) | 0.449 ppb             | 53,021 cps        | 0.7 %         |
| 141Pr (KED) | 0.052 ppb             | 6,418 cps         | 3.4 %         |
| 142Nd (KED) | 0.286 ppb             | 14,011 cps        | 1.6 %         |
| 152Sm (KED) | 0.037 ppb             | 1,662 cps         | 2.5 %         |
| 153Eu (KED) | 0.008 ppb             | 690 cps           | 5.5 %         |
| 158Gd (KED) | 0.032 ppb             | 1,916 cps         | 3.7 %         |
| 159Tb (KED) | 102.439 %             | 4,146,159 cps     | 0.7 %         |
| 164Dy (KED) | 0.022 ppb             | 1,506 cps         | 3.0 %         |
| 166Er (KED) | 0.008 ppb             | 1,149 cps         | 1.5 %         |
| 169Tm (KED) | 0.001 ppb             | 422 cps           | 9.6 %         |
| 174Yb (KED) | 0.009 ppb             | 859 cps           | 10.5 %        |
| 175Lu (KED) | -0.122 ppb            | 17,604 cps        | 1.1 %         |
| 205Tl (KED) | 0.003 ppb             | 629 cps           | 6.7 %         |
| 208Pb (KED) | 0.383 ppb             | 54,823 cps        | 0.7 %         |
| 209Bi (KED) | 93.664 %              | 3,459,087 cps     | 2.3 %         |
| 232Th (KED) | 0.054 ppb             | 13,437 cps        | 0.9 %         |
| 238U (KED)  | 0.013 ppb             | 3,930 cps         | 3.1 %         |

## Sample Summary

Instrument ID: iCAP Q

Analysis index: 23

Analysis name: w118ti

Analysis started at: 10/18/2021 4:26:52 PM

User name: WINDOWS-UPCI4ER\Administrator

| Category    | Concentration average | Concentration RSD |
|-------------|-----------------------|-------------------|
| 6Li (KED)   | 113.123 %             | 1.8 %             |
| 9Be (KED)   | 0.000 ppb             |                   |
| 11B (KED)   | 0.215 ppb             | 52.2 %            |
| 24Mg (KED)  | 224.418 ppb           | 0.4 %             |
| 27Al (KED)  | 183.412 ppb           | 0.8 %             |
| 45Sc (KED)  | 113.979 %             | 0.5 %             |
| 51V (KED)   | 0.340 ppb             | 2.3 %             |
| 52Cr (KED)  | 0.684 ppb             | 2.6 %             |
| 55Mn (KED)  | 6.280 ppb             | 0.8 %             |
| 56Fe (KED)  | 243.620 ppb           | 0.5 %             |
| 58Ni (KED)  | 1.179 ppb             | 0.8 %             |
| 59Co (KED)  | 0.111 ppb             | 2.7 %             |
| 63Cu (KED)  | 2.283 ppb             | 1.6 %             |
| 64Zn (KED)  | 52.478 ppb            | 0.6 %             |
| 69Ga (KED)  | 0.854 ppb             | 3.7 %             |
| 75As (KED)  | 0.099 ppb             | 11.8 %            |
| 80Se (KED)  | 0.289 ppb             | 30.0 %            |
| 85Rb (KED)  | 1.246 ppb             | 2.3 %             |
| 88Sr (KED)  | 4.624 ppb             | 2.0 %             |
| 89Y (KED)   | 110.317 %             | 0.9 %             |
| 107Ag (KED) | 0.032 ppb             | 3.3 %             |
| 114Cd (KED) | 0.008 ppb             | 29.7 %            |
| 115In (KED) | 105.202 %             | 1.7 %             |
| 133Cs (KED) | 0.033 ppb             | 5.2 %             |
| 138Ba (KED) | 2.819 ppb             | 1.6 %             |
| 139La (KED) | 0.224 ppb             | 3.4 %             |
| 140Ce (KED) | 0.435 ppb             | 2.8 %             |
| 141Pr (KED) | 0.053 ppb             | 4.5 %             |
| 142Nd (KED) | 0.288 ppb             | 0.9 %             |
| 152Sm (KED) | 0.038 ppb             | 4.7 %             |
| 153Eu (KED) | 0.007 ppb             | 7.9 %             |
| 158Gd (KED) | 0.030 ppb             | 4.6 %             |
| 159Tb (KED) | 110.227 %             | 1.5 %             |
| 164Dy (KED) | 0.020 ppb             | 2.3 %             |
| 166Er (KED) | 0.006 ppb             | 6.3 %             |
| 169Tm (KED) | 0.001 ppb             | 8.4 %             |
| 174Yb (KED) | 0.008 ppb             | 2.8 %             |
| 175Lu (KED) | -0.123 ppb            | 2.2 %             |
| 205Tl (KED) | 0.003 ppb             | 9.1 %             |
| 208Pb (KED) | 0.352 ppb             | 1.4 %             |
| 209Bi (KED) | 100.003 %             | 2.2 %             |
| 232Th (KED) | 0.053 ppb             | 2.7 %             |
| 238U (KED)  | 0.012 ppb             | 5.6 %             |

| Category   | Concentration average | Intensity average | Intensity RSD |
|------------|-----------------------|-------------------|---------------|
| 6Li (KED)  | 113.123 %             | 3,392 cps         | 1.8 %         |
| 9Be (KED)  | 0.000 ppb             | 0 cps             |               |
| 11B (KED)  | 0.215 ppb             | 563 cps           | 2.6 %         |
| 24Mg (KED) | 224.418 ppb           | 140,925 cps       | 1.4 %         |
| 27Al (KED) | 183.412 ppb           | 28,516 cps        | 1.3 %         |

| Category    | Concentration average | Intensity average | Intensity RSD |
|-------------|-----------------------|-------------------|---------------|
| 45Sc (KED)  | 113.979 %             | 53,420 cps        | 0.5 %         |
| 51V (KED)   | 0.340 ppb             | 3,165 cps         | 2.6 %         |
| 52Cr (KED)  | 0.684 ppb             | 10,071 cps        | 2.5 %         |
| 55Mn (KED)  | 6.280 ppb             | 46,764 cps        | 1.2 %         |
| 56Fe (KED)  | 243.620 ppb           | 3,290,886 cps     | 0.7 %         |
| 58Ni (KED)  | 1.179 ppb             | 21,151 cps        | 1.2 %         |
| 59Co (KED)  | 0.111 ppb             | 3,214 cps         | 2.3 %         |
| 63Cu (KED)  | 2.283 ppb             | 58,766 cps        | 1.9 %         |
| 64Zn (KED)  | 52.478 ppb            | 347,158 cps       | 0.7 %         |
| 69Ga (KED)  | 0.854 ppb             | 6,040 cps         | 3.1 %         |
| 75As (KED)  | 0.099 ppb             | 193 cps           | 10.5 %        |
| 80Se (KED)  | 0.289 ppb             | 1,321 cps         | 3.2 %         |
| 85Rb (KED)  | 1.246 ppb             | 8,117 cps         | 3.0 %         |
| 88Sr (KED)  | 4.624 ppb             | 42,424 cps        | 2.7 %         |
| 89Y (KED)   | 110.317 %             | 474,516 cps       | 0.9 %         |
| 107Ag (KED) | 0.032 ppb             | 1,850 cps         | 1.6 %         |
| 114Cd (KED) | 0.008 ppb             | 274 cps           | 18.4 %        |
| 115In (KED) | 105.202 %             | 849,703 cps       | 1.7 %         |
| 133Cs (KED) | 0.033 ppb             | 1,043 cps         | 3.8 %         |
| 138Ba (KED) | 2.819 ppb             | 124,129 cps       | 0.9 %         |
| 139La (KED) | 0.224 ppb             | 21,118 cps        | 2.0 %         |
| 140Ce (KED) | 0.435 ppb             | 55,263 cps        | 1.4 %         |
| 141Pr (KED) | 0.053 ppb             | 7,014 cps         | 3.0 %         |
| 142Nd (KED) | 0.288 ppb             | 15,191 cps        | 2.3 %         |
| 152Sm (KED) | 0.038 ppb             | 1,811 cps         | 4.6 %         |
| 153Eu (KED) | 0.007 ppb             | 721 cps           | 8.2 %         |
| 158Gd (KED) | 0.030 ppb             | 1,932 cps         | 3.8 %         |
| 159Tb (KED) | 110.227 %             | 4,461,401 cps     | 1.5 %         |
| 164Dy (KED) | 0.020 ppb             | 1,481 cps         | 1.3 %         |
| 166Er (KED) | 0.006 ppb             | 1,080 cps         | 3.2 %         |
| 169Tm (KED) | 0.001 ppb             | 387 cps           | 6.7 %         |
| 174Yb (KED) | 0.008 ppb             | 871 cps           | 1.5 %         |
| 175Lu (KED) | -0.123 ppb            | 18,807 cps        | 3.6 %         |
| 205Tl (KED) | 0.003 ppb             | 580 cps           | 8.0 %         |
| 208Pb (KED) | 0.352 ppb             | 54,421 cps        | 1.5 %         |
| 209Bi (KED) | 100.003 %             | 3,693,164 cps     | 2.2 %         |
| 232Th (KED) | 0.053 ppb             | 14,234 cps        | 3.5 %         |
| 238U (KED)  | 0.012 ppb             | 3,764 cps         | 3.3 %         |

## Sample Summary

Instrument ID: iCAP Q

Analysis index: 24

Analysis name: 191075ti

Analysis started at: 10/18/2021 4:31:10 PM

User name: WINDOWS-UPCI4ER\Administrator

| Category    | Concentration average | Concentration RSD |
|-------------|-----------------------|-------------------|
| 6Li (KED)   | 113.197 %             | 2.4 %             |
| 9Be (KED)   | 0.000 ppb             |                   |
| 11B (KED)   | -0.006 ppb            | 12,094.9 %        |
| 24Mg (KED)  | 253.544 ppb           | 2.9 %             |
| 27Al (KED)  | 209.184 ppb           | 2.3 %             |
| 45Sc (KED)  | 114.182 %             | 1.7 %             |
| 51V (KED)   | 0.390 ppb             | 2.0 %             |
| 52Cr (KED)  | 0.677 ppb             | 1.2 %             |
| 55Mn (KED)  | 7.209 ppb             | 1.4 %             |
| 56Fe (KED)  | 266.329 ppb           | 2.3 %             |
| 58Ni (KED)  | 1.153 ppb             | 0.3 %             |
| 59Co (KED)  | 0.114 ppb             | 5.2 %             |
| 63Cu (KED)  | 1.976 ppb             | 1.8 %             |
| 64Zn (KED)  | 50.860 ppb            | 1.6 %             |
| 69Ga (KED)  | 0.919 ppb             | 4.7 %             |
| 75As (KED)  | 0.112 ppb             | 10.5 %            |
| 80Se (KED)  | 0.505 ppb             | 28.5 %            |
| 85Rb (KED)  | 1.123 ppb             | 1.4 %             |
| 88Sr (KED)  | 4.804 ppb             | 2.7 %             |
| 89Y (KED)   | 109.821 %             | 2.5 %             |
| 107Ag (KED) | 0.019 ppb             | 2.9 %             |
| 114Cd (KED) | 0.008 ppb             | 24.0 %            |
| 115In (KED) | 105.403 %             | 1.2 %             |
| 133Cs (KED) | 0.040 ppb             | 5.2 %             |
| 138Ba (KED) | 3.025 ppb             | 0.9 %             |
| 139La (KED) | 0.210 ppb             | 0.9 %             |
| 140Ce (KED) | 0.420 ppb             | 1.3 %             |
| 141Pr (KED) | 0.052 ppb             | 2.4 %             |
| 142Nd (KED) | 0.277 ppb             | 1.4 %             |
| 152Sm (KED) | 0.037 ppb             | 10.8 %            |
| 153Eu (KED) | 0.008 ppb             | 10.1 %            |
| 158Gd (KED) | 0.034 ppb             | 3.3 %             |
| 159Tb (KED) | 110.576 %             | 0.4 %             |
| 164Dy (KED) | 0.024 ppb             | 8.2 %             |
| 166Er (KED) | 0.008 ppb             | 12.8 %            |
| 169Tm (KED) | 0.001 ppb             | 18.5 %            |
| 174Yb (KED) | 0.009 ppb             | 6.6 %             |
| 175Lu (KED) | -0.128 ppb            | 0.9 %             |
| 205Tl (KED) | 0.003 ppb             | 8.4 %             |
| 208Pb (KED) | 0.271 ppb             | 1.3 %             |
| 209Bi (KED) | 100.574 %             | 2.3 %             |
| 232Th (KED) | 0.063 ppb             | 2.3 %             |
| 238U (KED)  | 0.012 ppb             | 4.3 %             |

| Category   | Concentration average | Intensity average | Intensity RSD |
|------------|-----------------------|-------------------|---------------|
| 6Li (KED)  | 113.197 %             | 3,394 cps         | 2.4 %         |
| 9Be (KED)  | 0.000 ppb             | 0 cps             |               |
| 11B (KED)  | -0.006 ppb            | 540 cps           | 10.9 %        |
| 24Mg (KED) | 253.544 ppb           | 159,238 cps       | 0.5 %         |
| 27Al (KED) | 209.184 ppb           | 32,564 cps        | 1.3 %         |

| Category    | Concentration average | Intensity average | Intensity RSD |
|-------------|-----------------------|-------------------|---------------|
| 45Sc (KED)  | 114.182 %             | 53,514 cps        | 1.7 %         |
| 51V (KED)   | 0.390 ppb             | 3,633 cps         | 0.7 %         |
| 52Cr (KED)  | 0.677 ppb             | 9,987 cps         | 1.0 %         |
| 55Mn (KED)  | 7.209 ppb             | 53,760 cps        | 0.5 %         |
| 56Fe (KED)  | 266.329 ppb           | 3,602,952 cps     | 0.8 %         |
| 58Ni (KED)  | 1.153 ppb             | 20,723 cps        | 1.4 %         |
| 59Co (KED)  | 0.114 ppb             | 3,302 cps         | 3.6 %         |
| 63Cu (KED)  | 1.976 ppb             | 52,001 cps        | 1.8 %         |
| 64Zn (KED)  | 50.860 ppb            | 334,973 cps       | 1.0 %         |
| 69Ga (KED)  | 0.919 ppb             | 6,464 cps         | 2.7 %         |
| 75As (KED)  | 0.112 ppb             | 216 cps           | 7.8 %         |
| 80Se (KED)  | 0.505 ppb             | 1,446 cps         | 7.1 %         |
| 85Rb (KED)  | 1.123 ppb             | 7,284 cps         | 2.8 %         |
| 88Sr (KED)  | 4.804 ppb             | 43,850 cps        | 0.2 %         |
| 89Y (KED)   | 109.821 %             | 472,380 cps       | 2.5 %         |
| 107Ag (KED) | 0.019 ppb             | 1,110 cps         | 3.0 %         |
| 114Cd (KED) | 0.008 ppb             | 264 cps           | 16.5 %        |
| 115In (KED) | 105.403 %             | 851,330 cps       | 1.2 %         |
| 133Cs (KED) | 0.040 ppb             | 1,271 cps         | 6.3 %         |
| 138Ba (KED) | 3.025 ppb             | 133,528 cps       | 1.0 %         |
| 139La (KED) | 0.210 ppb             | 19,897 cps        | 0.8 %         |
| 140Ce (KED) | 0.420 ppb             | 53,617 cps        | 1.0 %         |
| 141Pr (KED) | 0.052 ppb             | 6,958 cps         | 2.7 %         |
| 142Nd (KED) | 0.277 ppb             | 14,682 cps        | 1.5 %         |
| 152Sm (KED) | 0.037 ppb             | 1,795 cps         | 10.4 %        |
| 153Eu (KED) | 0.008 ppb             | 750 cps           | 9.6 %         |
| 158Gd (KED) | 0.034 ppb             | 2,186 cps         | 3.2 %         |
| 159Tb (KED) | 110.576 %             | 4,475,498 cps     | 0.4 %         |
| 164Dy (KED) | 0.024 ppb             | 1,728 cps         | 8.1 %         |
| 166Er (KED) | 0.008 ppb             | 1,256 cps         | 6.4 %         |
| 169Tm (KED) | 0.001 ppb             | 447 cps           | 16.6 %        |
| 174Yb (KED) | 0.009 ppb             | 962 cps           | 6.3 %         |
| 175Lu (KED) | -0.128 ppb            | 17,951 cps        | 1.2 %         |
| 205Tl (KED) | 0.003 ppb             | 682 cps           | 6.7 %         |
| 208Pb (KED) | 0.271 ppb             | 43,771 cps        | 1.3 %         |
| 209Bi (KED) | 100.574 %             | 3,714,253 cps     | 2.3 %         |
| 232Th (KED) | 0.063 ppb             | 16,890 cps        | 0.2 %         |
| 238U (KED)  | 0.012 ppb             | 3,732 cps         | 2.0 %         |

## Sample Summary

Instrument ID: iCAP Q

Analysis index: 25

Analysis name: 191078ti

Analysis started at: 10/18/2021 4:35:18 PM

User name: WINDOWS-UPCI4ER\Administrator

| Category    | Concentration average | Concentration RSD |
|-------------|-----------------------|-------------------|
| 6Li (KED)   | 112.826 %             | 3.7 %             |
| 9Be (KED)   | 0.006 ppb             | 173.2 %           |
| 11B (KED)   | 1.786 ppb             | 27.9 %            |
| 24Mg (KED)  | 188.868 ppb           | 4.0 %             |
| 27Al (KED)  | 126.958 ppb           | 1.0 %             |
| 45Sc (KED)  | 113.767 %             | 1.2 %             |
| 51V (KED)   | 0.230 ppb             | 5.2 %             |
| 52Cr (KED)  | 0.486 ppb             | 2.9 %             |
| 55Mn (KED)  | 4.922 ppb             | 1.0 %             |
| 56Fe (KED)  | 172.584 ppb           | 1.3 %             |
| 58Ni (KED)  | 1.051 ppb             | 0.9 %             |
| 59Co (KED)  | 0.080 ppb             | 4.1 %             |
| 63Cu (KED)  | 1.753 ppb             | 0.3 %             |
| 64Zn (KED)  | 56.038 ppb            | 1.6 %             |
| 69Ga (KED)  | 0.596 ppb             | 2.8 %             |
| 75As (KED)  | 0.067 ppb             | 17.9 %            |
| 80Se (KED)  | 0.611 ppb             | 2.6 %             |
| 85Rb (KED)  | 0.977 ppb             | 2.4 %             |
| 88Sr (KED)  | 3.279 ppb             | 0.8 %             |
| 89Y (KED)   | 109.259 %             | 1.3 %             |
| 107Ag (KED) | 0.017 ppb             | 7.5 %             |
| 114Cd (KED) | 0.012 ppb             | 9.9 %             |
| 115In (KED) | 105.378 %             | 2.0 %             |
| 133Cs (KED) | 0.024 ppb             | 1.5 %             |
| 138Ba (KED) | 1.943 ppb             | 1.4 %             |
| 139La (KED) | 0.124 ppb             | 1.8 %             |
| 140Ce (KED) | 0.240 ppb             | 2.4 %             |
| 141Pr (KED) | 0.029 ppb             | 4.3 %             |
| 142Nd (KED) | 0.156 ppb             | 2.6 %             |
| 152Sm (KED) | 0.021 ppb             | 2.9 %             |
| 153Eu (KED) | 0.004 ppb             | 3.5 %             |
| 158Gd (KED) | 0.018 ppb             | 2.2 %             |
| 159Tb (KED) | 112.274 %             | 3.2 %             |
| 164Dy (KED) | 0.014 ppb             | 9.3 %             |
| 166Er (KED) | 0.002 ppb             | 9.4 %             |
| 169Tm (KED) | 0.001 ppb             | 14.2 %            |
| 174Yb (KED) | 0.005 ppb             | 7.8 %             |
| 175Lu (KED) | -0.129 ppb            | 1.0 %             |
| 205Tl (KED) | 0.003 ppb             | 6.6 %             |
| 208Pb (KED) | 0.223 ppb             | 1.3 %             |
| 209Bi (KED) | 99.139 %              | 1.7 %             |
| 232Th (KED) | 0.034 ppb             | 0.2 %             |
| 238U (KED)  | 0.007 ppb             | 9.4 %             |

| Category   | Concentration average | Intensity average | Intensity RSD |
|------------|-----------------------|-------------------|---------------|
| 6Li (KED)  | 112.826 %             | 3,383 cps         | 3.7 %         |
| 9Be (KED)  | 0.006 ppb             | 1 cps             | 173.2 %       |
| 11B (KED)  | 1.786 ppb             | 721 cps           | 4.6 %         |
| 24Mg (KED) | 188.868 ppb           | 118,196 cps       | 0.2 %         |
| 27Al (KED) | 126.958 ppb           | 19,720 cps        | 0.4 %         |

| Category    | Concentration average | Intensity average | Intensity RSD |
|-------------|-----------------------|-------------------|---------------|
| 45Sc (KED)  | 113.767 %             | 53,320 cps        | 1.2 %         |
| 51V (KED)   | 0.230 ppb             | 2,140 cps         | 5.8 %         |
| 52Cr (KED)  | 0.486 ppb             | 7,178 cps         | 1.7 %         |
| 55Mn (KED)  | 4.922 ppb             | 36,586 cps        | 0.5 %         |
| 56Fe (KED)  | 172.584 ppb           | 2,327,560 cps     | 1.5 %         |
| 58Ni (KED)  | 1.051 ppb             | 18,845 cps        | 1.5 %         |
| 59Co (KED)  | 0.080 ppb             | 2,302 cps         | 4.8 %         |
| 63Cu (KED)  | 1.753 ppb             | 47,038 cps        | 1.1 %         |
| 64Zn (KED)  | 56.038 ppb            | 366,861 cps       | 0.8 %         |
| 69Ga (KED)  | 0.596 ppb             | 4,200 cps         | 2.9 %         |
| 75As (KED)  | 0.067 ppb             | 136 cps           | 16.7 %        |
| 80Se (KED)  | 0.611 ppb             | 1,501 cps         | 1.1 %         |
| 85Rb (KED)  | 0.977 ppb             | 6,302 cps         | 1.2 %         |
| 88Sr (KED)  | 3.279 ppb             | 29,827 cps        | 1.2 %         |
| 89Y (KED)   | 109.259 %             | 469,962 cps       | 1.3 %         |
| 107Ag (KED) | 0.017 ppb             | 990 cps           | 5.5 %         |
| 114Cd (KED) | 0.012 ppb             | 356 cps           | 5.3 %         |
| 115In (KED) | 105.378 %             | 851,125 cps       | 2.0 %         |
| 133Cs (KED) | 0.024 ppb             | 774 cps           | 3.3 %         |
| 138Ba (KED) | 1.943 ppb             | 87,587 cps        | 2.0 %         |
| 139La (KED) | 0.124 ppb             | 11,902 cps        | 2.0 %         |
| 140Ce (KED) | 0.240 ppb             | 31,300 cps        | 1.0 %         |
| 141Pr (KED) | 0.029 ppb             | 3,975 cps         | 1.6 %         |
| 142Nd (KED) | 0.156 ppb             | 8,408 cps         | 3.0 %         |
| 152Sm (KED) | 0.021 ppb             | 1,041 cps         | 3.2 %         |
| 153Eu (KED) | 0.004 ppb             | 438 cps           | 5.4 %         |
| 158Gd (KED) | 0.018 ppb             | 1,205 cps         | 1.1 %         |
| 159Tb (KED) | 112.274 %             | 4,544,227 cps     | 3.2 %         |
| 164Dy (KED) | 0.014 ppb             | 1,007 cps         | 6.0 %         |
| 166Er (KED) | 0.002 ppb             | 768 cps           | 1.3 %         |
| 169Tm (KED) | 0.001 ppb             | 253 cps           | 10.8 %        |
| 174Yb (KED) | 0.005 ppb             | 582 cps           | 7.6 %         |
| 175Lu (KED) | -0.129 ppb            | 18,140 cps        | 2.0 %         |
| 205Tl (KED) | 0.003 ppb             | 504 cps           | 7.8 %         |
| 208Pb (KED) | 0.223 ppb             | 36,910 cps        | 2.5 %         |
| 209Bi (KED) | 99.139 %              | 3,661,279 cps     | 1.7 %         |
| 232Th (KED) | 0.034 ppb             | 8,939 cps         | 1.5 %         |
| 238U (KED)  | 0.007 ppb             | 2,319 cps         | 7.2 %         |

## Sample Summary

Instrument ID: iCAP Q

Analysis index: 26

Analysis name: 191071ti

Analysis started at: 10/18/2021 4:39:23 PM

User name: WINDOWS-UPCI4ER\Administrator

| Category    | Concentration average | Concentration RSD |
|-------------|-----------------------|-------------------|
| 6Li (KED)   | 114.754 %             | 2.0 %             |
| 9Be (KED)   | 0.006 ppb             | 173.2 %           |
| 11B (KED)   | 4.669 ppb             | 15.9 %            |
| 24Mg (KED)  | 126.539 ppb           | 0.6 %             |
| 27Al (KED)  | 85.613 ppb            | 2.0 %             |
| 45Sc (KED)  | 115.184 %             | 1.3 %             |
| 51V (KED)   | 0.150 ppb             | 1.9 %             |
| 52Cr (KED)  | 0.406 ppb             | 3.6 %             |
| 55Mn (KED)  | 3.137 ppb             | 2.8 %             |
| 56Fe (KED)  | 115.726 ppb           | 1.4 %             |
| 58Ni (KED)  | 0.616 ppb             | 0.9 %             |
| 59Co (KED)  | 0.050 ppb             | 4.8 %             |
| 63Cu (KED)  | 1.430 ppb             | 1.2 %             |
| 64Zn (KED)  | 54.088 ppb            | 1.9 %             |
| 69Ga (KED)  | 0.463 ppb             | 0.8 %             |
| 75As (KED)  | 0.063 ppb             | 5.7 %             |
| 80Se (KED)  | 0.411 ppb             | 25.8 %            |
| 85Rb (KED)  | 0.853 ppb             | 3.7 %             |
| 88Sr (KED)  | 2.329 ppb             | 1.2 %             |
| 89Y (KED)   | 111.985 %             | 2.2 %             |
| 107Ag (KED) | 0.016 ppb             | 5.0 %             |
| 114Cd (KED) | 0.009 ppb             | 15.6 %            |
| 115In (KED) | 106.793 %             | 0.7 %             |
| 133Cs (KED) | 0.017 ppb             | 8.3 %             |
| 138Ba (KED) | 1.613 ppb             | 1.2 %             |
| 139La (KED) | 0.077 ppb             | 0.9 %             |
| 140Ce (KED) | 0.157 ppb             | 1.2 %             |
| 141Pr (KED) | 0.019 ppb             | 1.4 %             |
| 142Nd (KED) | 0.101 ppb             | 1.8 %             |
| 152Sm (KED) | 0.014 ppb             | 3.5 %             |
| 153Eu (KED) | 0.003 ppb             | 6.8 %             |
| 158Gd (KED) | 0.012 ppb             | 5.5 %             |
| 159Tb (KED) | 110.391 %             | 0.3 %             |
| 164Dy (KED) | 0.009 ppb             | 7.6 %             |
| 166Er (KED) | 0.000 ppb             | 640.6 %           |
| 169Tm (KED) | 0.000 ppb             | 23.5 %            |
| 174Yb (KED) | 0.003 ppb             | 8.2 %             |
| 175Lu (KED) | -0.130 ppb            | 2.5 %             |
| 205Tl (KED) | 0.002 ppb             | 16.1 %            |
| 208Pb (KED) | 0.188 ppb             | 1.3 %             |
| 209Bi (KED) | 100.759 %             | 1.6 %             |
| 232Th (KED) | 0.020 ppb             | 3.7 %             |
| 238U (KED)  | 0.007 ppb             | 6.1 %             |

| Category   | Concentration average | Intensity average | Intensity RSD |
|------------|-----------------------|-------------------|---------------|
| 6Li (KED)  | 114.754 %             | 3,440 cps         | 2.0 %         |
| 9Be (KED)  | 0.006 ppb             | 1 cps             | 173.2 %       |
| 11B (KED)  | 4.669 ppb             | 1,034 cps         | 8.9 %         |
| 24Mg (KED) | 126.539 ppb           | 80,654 cps        | 1.5 %         |
| 27Al (KED) | 85.613 ppb            | 13,484 cps        | 1.0 %         |

| Category    | Concentration average | Intensity average | Intensity RSD |
|-------------|-----------------------|-------------------|---------------|
| 45Sc (KED)  | 115.184 %             | 53,984 cps        | 1.3 %         |
| 51V (KED)   | 0.150 ppb             | 1,408 cps         | 1.1 %         |
| 52Cr (KED)  | 0.406 ppb             | 6,081 cps         | 4.6 %         |
| 55Mn (KED)  | 3.137 ppb             | 23,622 cps        | 1.5 %         |
| 56Fe (KED)  | 115.726 ppb           | 1,580,816 cps     | 0.9 %         |
| 58Ni (KED)  | 0.616 ppb             | 11,310 cps        | 2.0 %         |
| 59Co (KED)  | 0.050 ppb             | 1,465 cps         | 3.8 %         |
| 63Cu (KED)  | 1.430 ppb             | 41,229 cps        | 1.3 %         |
| 64Zn (KED)  | 54.088 ppb            | 363,011 cps       | 0.4 %         |
| 69Ga (KED)  | 0.463 ppb             | 3,364 cps         | 1.7 %         |
| 75As (KED)  | 0.063 ppb             | 130 cps           | 5.1 %         |
| 80Se (KED)  | 0.411 ppb             | 1,417 cps         | 6.6 %         |
| 85Rb (KED)  | 0.853 ppb             | 5,647 cps         | 5.2 %         |
| 88Sr (KED)  | 2.329 ppb             | 21,746 cps        | 1.7 %         |
| 89Y (KED)   | 111.985 %             | 481,688 cps       | 2.2 %         |
| 107Ag (KED) | 0.016 ppb             | 939 cps           | 4.5 %         |
| 114Cd (KED) | 0.009 ppb             | 282 cps           | 10.2 %        |
| 115In (KED) | 106.793 %             | 862,553 cps       | 0.7 %         |
| 133Cs (KED) | 0.017 ppb             | 550 cps           | 7.9 %         |
| 138Ba (KED) | 1.613 ppb             | 71,759 cps        | 1.4 %         |
| 139La (KED) | 0.077 ppb             | 7,258 cps         | 0.9 %         |
| 140Ce (KED) | 0.157 ppb             | 20,179 cps        | 1.0 %         |
| 141Pr (KED) | 0.019 ppb             | 2,517 cps         | 1.4 %         |
| 142Nd (KED) | 0.101 ppb             | 5,372 cps         | 2.1 %         |
| 152Sm (KED) | 0.014 ppb             | 694 cps           | 3.1 %         |
| 153Eu (KED) | 0.003 ppb             | 300 cps           | 6.2 %         |
| 158Gd (KED) | 0.012 ppb             | 784 cps           | 5.5 %         |
| 159Tb (KED) | 110.391 %             | 4,468,033 cps     | 0.3 %         |
| 164Dy (KED) | 0.009 ppb             | 692 cps           | 7.1 %         |
| 166Er (KED) | 0.000 ppb             | 600 cps           | 5.9 %         |
| 169Tm (KED) | 0.000 ppb             | 168 cps           | 18.0 %        |
| 174Yb (KED) | 0.003 ppb             | 384 cps           | 7.8 %         |
| 175Lu (KED) | -0.130 ppb            | 17,722 cps        | 3.3 %         |
| 205Tl (KED) | 0.002 ppb             | 378 cps           | 14.2 %        |
| 208Pb (KED) | 0.188 ppb             | 32,734 cps        | 1.5 %         |
| 209Bi (KED) | 100.759 %             | 3,721,115 cps     | 1.6 %         |
| 232Th (KED) | 0.020 ppb             | 5,470 cps         | 2.5 %         |
| 238U (KED)  | 0.007 ppb             | 2,394 cps         | 5.3 %         |

## Sample Summary

Instrument ID: iCAP Q

Analysis index: 27

Analysis name: y100ti

Analysis started at: 10/18/2021 4:43:16 PM

User name: WINDOWS-UPCI4ER\Administrator

| Category    | Concentration average | Concentration RSD |
|-------------|-----------------------|-------------------|
| 6Li (KED)   | 112.826 %             | 2.7 %             |
| 9Be (KED)   | 0.023 ppb             | 173.2 %           |
| 11B (KED)   | 6.569 ppb             | 19.4 %            |
| 24Mg (KED)  | 188.803 ppb           | 0.8 %             |
| 27Al (KED)  | 155.409 ppb           | 1.9 %             |
| 45Sc (KED)  | 112.893 %             | 0.6 %             |
| 51V (KED)   | 0.282 ppb             | 0.4 %             |
| 52Cr (KED)  | 0.599 ppb             | 1.6 %             |
| 55Mn (KED)  | 5.075 ppb             | 1.6 %             |
| 56Fe (KED)  | 188.157 ppb           | 1.0 %             |
| 58Ni (KED)  | 1.067 ppb             | 1.7 %             |
| 59Co (KED)  | 0.084 ppb             | 5.5 %             |
| 63Cu (KED)  | 1.881 ppb             | 4.2 %             |
| 64Zn (KED)  | 62.088 ppb            | 2.3 %             |
| 69Ga (KED)  | 0.705 ppb             | 3.7 %             |
| 75As (KED)  | 0.105 ppb             | 5.4 %             |
| 80Se (KED)  | 0.402 ppb             | 25.1 %            |
| 85Rb (KED)  | 0.843 ppb             | 2.2 %             |
| 88Sr (KED)  | 3.941 ppb             | 0.7 %             |
| 89Y (KED)   | 109.352 %             | 1.2 %             |
| 107Ag (KED) | 0.011 ppb             | 9.1 %             |
| 114Cd (KED) | 0.007 ppb             | 6.7 %             |
| 115In (KED) | 104.938 %             | 0.6 %             |
| 133Cs (KED) | 0.031 ppb             | 6.5 %             |
| 138Ba (KED) | 2.299 ppb             | 2.0 %             |
| 139La (KED) | 0.167 ppb             | 3.8 %             |
| 140Ce (KED) | 0.341 ppb             | 3.9 %             |
| 141Pr (KED) | 0.039 ppb             | 4.0 %             |
| 142Nd (KED) | 0.208 ppb             | 6.1 %             |
| 152Sm (KED) | 0.026 ppb             | 3.4 %             |
| 153Eu (KED) | 0.005 ppb             | 4.4 %             |
| 158Gd (KED) | 0.023 ppb             | 10.2 %            |
| 159Tb (KED) | 112.277 %             | 3.6 %             |
| 164Dy (KED) | 0.016 ppb             | 7.7 %             |
| 166Er (KED) | 0.004 ppb             | 29.1 %            |
| 169Tm (KED) | 0.001 ppb             | 17.9 %            |
| 174Yb (KED) | 0.008 ppb             | 4.9 %             |
| 175Lu (KED) | -0.129 ppb            | 3.3 %             |
| 205Tl (KED) | 0.003 ppb             | 3.5 %             |
| 208Pb (KED) | 0.339 ppb             | 1.6 %             |
| 209Bi (KED) | 100.475 %             | 0.9 %             |
| 232Th (KED) | 0.043 ppb             | 2.8 %             |
| 238U (KED)  | 0.011 ppb             | 4.7 %             |

| Category   | Concentration average | Intensity average | Intensity RSD |
|------------|-----------------------|-------------------|---------------|
| 6Li (KED)  | 112.826 %             | 3,383 cps         | 2.7 %         |
| 9Be (KED)  | 0.023 ppb             | 4 cps             | 173.2 %       |
| 11B (KED)  | 6.569 ppb             | 1,208 cps         | 8.2 %         |
| 24Mg (KED) | 188.803 ppb           | 118,254 cps       | 1.9 %         |
| 27Al (KED) | 155.409 ppb           | 23,940 cps        | 1.4 %         |

| Category    | Concentration average | Intensity average | Intensity RSD |
|-------------|-----------------------|-------------------|---------------|
| 45Sc (KED)  | 112.893 %             | 52,911 cps        | 0.6 %         |
| 51V (KED)   | 0.282 ppb             | 2,602 cps         | 0.4 %         |
| 52Cr (KED)  | 0.599 ppb             | 8,752 cps         | 2.2 %         |
| 55Mn (KED)  | 5.075 ppb             | 37,433 cps        | 1.0 %         |
| 56Fe (KED)  | 188.157 ppb           | 2,517,896 cps     | 0.6 %         |
| 58Ni (KED)  | 1.067 ppb             | 18,988 cps        | 1.9 %         |
| 59Co (KED)  | 0.084 ppb             | 2,406 cps         | 5.1 %         |
| 63Cu (KED)  | 1.881 ppb             | 49,761 cps        | 2.2 %         |
| 64Zn (KED)  | 62.088 ppb            | 406,399 cps       | 1.2 %         |
| 69Ga (KED)  | 0.705 ppb             | 4,958 cps         | 4.4 %         |
| 75As (KED)  | 0.105 ppb             | 202 cps           | 3.8 %         |
| 80Se (KED)  | 0.402 ppb             | 1,377 cps         | 3.4 %         |
| 85Rb (KED)  | 0.843 ppb             | 5,448 cps         | 2.2 %         |
| 88Sr (KED)  | 3.941 ppb             | 35,860 cps        | 1.9 %         |
| 89Y (KED)   | 109.352 %             | 470,364 cps       | 1.2 %         |
| 107Ag (KED) | 0.011 ppb             | 688 cps           | 8.2 %         |
| 114Cd (KED) | 0.007 ppb             | 250 cps           | 4.8 %         |
| 115In (KED) | 104.938 %             | 847,575 cps       | 0.6 %         |
| 133Cs (KED) | 0.031 ppb             | 973 cps           | 6.2 %         |
| 138Ba (KED) | 2.299 ppb             | 103,365 cps       | 1.6 %         |
| 139La (KED) | 0.167 ppb             | 16,025 cps        | 1.7 %         |
| 140Ce (KED) | 0.341 ppb             | 44,166 cps        | 1.8 %         |
| 141Pr (KED) | 0.039 ppb             | 5,310 cps         | 0.6 %         |
| 142Nd (KED) | 0.208 ppb             | 11,164 cps        | 2.6 %         |
| 152Sm (KED) | 0.026 ppb             | 1,261 cps         | 1.5 %         |
| 153Eu (KED) | 0.005 ppb             | 496 cps           | 7.0 %         |
| 158Gd (KED) | 0.023 ppb             | 1,519 cps         | 6.8 %         |
| 159Tb (KED) | 112.277 %             | 4,544,364 cps     | 3.6 %         |
| 164Dy (KED) | 0.016 ppb             | 1,220 cps         | 6.0 %         |
| 166Er (KED) | 0.004 ppb             | 969 cps           | 7.6 %         |
| 169Tm (KED) | 0.001 ppb             | 331 cps           | 12.3 %        |
| 174Yb (KED) | 0.008 ppb             | 827 cps           | 1.5 %         |
| 175Lu (KED) | -0.129 ppb            | 18,087 cps        | 3.0 %         |
| 205Tl (KED) | 0.003 ppb             | 497 cps           | 2.4 %         |
| 208Pb (KED) | 0.339 ppb             | 52,901 cps        | 1.0 %         |
| 209Bi (KED) | 100.475 %             | 3,710,598 cps     | 0.9 %         |
| 232Th (KED) | 0.043 ppb             | 11,475 cps        | 1.9 %         |
| 238U (KED)  | 0.011 ppb             | 3,557 cps         | 3.7 %         |

## Sample Summary

Instrument ID: iCAP Q

Analysis index: 28

Analysis name: 191066ti

Analysis started at: 10/18/2021 4:47:17 PM

User name: WINDOWS-UPCI4ER\Administrator

| Category    | Concentration average | Concentration RSD |
|-------------|-----------------------|-------------------|
| 6Li (KED)   | 112.900 %             | 6.2 %             |
| 9Be (KED)   | 0.012 ppb             | 86.7 %            |
| 11B (KED)   | 5.560 ppb             | 25.8 %            |
| 24Mg (KED)  | 173.550 ppb           | 7.5 %             |
| 27Al (KED)  | 138.893 ppb           | 0.8 %             |
| 45Sc (KED)  | 113.406 %             | 0.5 %             |
| 51V (KED)   | 0.257 ppb             | 5.7 %             |
| 52Cr (KED)  | 0.467 ppb             | 2.7 %             |
| 55Mn (KED)  | 4.806 ppb             | 1.4 %             |
| 56Fe (KED)  | 167.802 ppb           | 1.3 %             |
| 58Ni (KED)  | 1.057 ppb             | 1.0 %             |
| 59Co (KED)  | 0.081 ppb             | 3.0 %             |
| 63Cu (KED)  | 1.188 ppb             | 2.7 %             |
| 64Zn (KED)  | 53.938 ppb            | 1.9 %             |
| 69Ga (KED)  | 0.691 ppb             | 6.0 %             |
| 75As (KED)  | 0.080 ppb             | 17.8 %            |
| 80Se (KED)  | 0.487 ppb             | 36.8 %            |
| 85Rb (KED)  | 1.061 ppb             | 2.4 %             |
| 88Sr (KED)  | 3.548 ppb             | 1.5 %             |
| 89Y (KED)   | 111.198 %             | 0.7 %             |
| 107Ag (KED) | 0.013 ppb             | 5.0 %             |
| 114Cd (KED) | 0.005 ppb             | 17.9 %            |
| 115In (KED) | 106.088 %             | 1.0 %             |
| 133Cs (KED) | 0.025 ppb             | 10.7 %            |
| 138Ba (KED) | 2.361 ppb             | 2.3 %             |
| 139La (KED) | 0.163 ppb             | 1.6 %             |
| 140Ce (KED) | 0.329 ppb             | 2.6 %             |
| 141Pr (KED) | 0.037 ppb             | 3.6 %             |
| 142Nd (KED) | 0.205 ppb             | 1.6 %             |
| 152Sm (KED) | 0.026 ppb             | 14.7 %            |
| 153Eu (KED) | 0.005 ppb             | 12.4 %            |
| 158Gd (KED) | 0.023 ppb             | 4.2 %             |
| 159Tb (KED) | 109.307 %             | 2.5 %             |
| 164Dy (KED) | 0.015 ppb             | 3.6 %             |
| 166Er (KED) | 0.003 ppb             | 14.5 %            |
| 169Tm (KED) | 0.001 ppb             | 9.0 %             |
| 174Yb (KED) | 0.006 ppb             | 4.0 %             |
| 175Lu (KED) | -0.128 ppb            | 2.6 %             |
| 205Tl (KED) | 0.003 ppb             | 6.9 %             |
| 208Pb (KED) | 0.223 ppb             | 3.2 %             |
| 209Bi (KED) | 100.292 %             | 1.7 %             |
| 232Th (KED) | 0.041 ppb             | 1.2 %             |
| 238U (KED)  | 0.008 ppb             | 3.5 %             |

| Category   | Concentration average | Intensity average | Intensity RSD |
|------------|-----------------------|-------------------|---------------|
| 6Li (KED)  | 112.900 %             | 3,385 cps         | 6.2 %         |
| 9Be (KED)  | 0.012 ppb             | 2 cps             | 86.6 %        |
| 11B (KED)  | 5.560 ppb             | 1,103 cps         | 8.9 %         |
| 24Mg (KED) | 173.550 ppb           | 108,462 cps       | 1.4 %         |
| 27Al (KED) | 138.893 ppb           | 21,501 cps        | 0.8 %         |

| Category    | Concentration average | Intensity average | Intensity RSD |
|-------------|-----------------------|-------------------|---------------|
| 45Sc (KED)  | 113.406 %             | 53,151 cps        | 0.5 %         |
| 51V (KED)   | 0.257 ppb             | 2,378 cps         | 6.1 %         |
| 52Cr (KED)  | 0.467 ppb             | 6,879 cps         | 3.0 %         |
| 55Mn (KED)  | 4.806 ppb             | 35,615 cps        | 1.6 %         |
| 56Fe (KED)  | 167.802 ppb           | 2,256,016 cps     | 1.5 %         |
| 58Ni (KED)  | 1.057 ppb             | 18,894 cps        | 0.6 %         |
| 59Co (KED)  | 0.081 ppb             | 2,322 cps         | 2.5 %         |
| 63Cu (KED)  | 1.188 ppb             | 35,758 cps        | 1.3 %         |
| 64Zn (KED)  | 53.938 ppb            | 359,537 cps       | 1.3 %         |
| 69Ga (KED)  | 0.691 ppb             | 4,942 cps         | 6.0 %         |
| 75As (KED)  | 0.080 ppb             | 161 cps           | 15.5 %        |
| 80Se (KED)  | 0.487 ppb             | 1,452 cps         | 7.7 %         |
| 85Rb (KED)  | 1.061 ppb             | 6,968 cps         | 1.7 %         |
| 88Sr (KED)  | 3.548 ppb             | 32,837 cps        | 1.9 %         |
| 89Y (KED)   | 111.198 %             | 478,305 cps       | 0.7 %         |
| 107Ag (KED) | 0.013 ppb             | 813 cps           | 4.6 %         |
| 114Cd (KED) | 0.005 ppb             | 210 cps           | 11.1 %        |
| 115In (KED) | 106.088 %             | 856,864 cps       | 1.0 %         |
| 133Cs (KED) | 0.025 ppb             | 810 cps           | 10.2 %        |
| 138Ba (KED) | 2.361 ppb             | 103,295 cps       | 1.7 %         |
| 139La (KED) | 0.163 ppb             | 15,246 cps        | 1.9 %         |
| 140Ce (KED) | 0.329 ppb             | 41,521 cps        | 1.7 %         |
| 141Pr (KED) | 0.037 ppb             | 4,903 cps         | 2.7 %         |
| 142Nd (KED) | 0.205 ppb             | 10,756 cps        | 3.8 %         |
| 152Sm (KED) | 0.026 ppb             | 1,248 cps         | 12.4 %        |
| 153Eu (KED) | 0.005 ppb             | 483 cps           | 9.0 %         |
| 158Gd (KED) | 0.023 ppb             | 1,468 cps         | 3.0 %         |
| 159Tb (KED) | 109.307 %             | 4,424,151 cps     | 2.5 %         |
| 164Dy (KED) | 0.015 ppb             | 1,092 cps         | 3.8 %         |
| 166Er (KED) | 0.003 ppb             | 832 cps           | 5.5 %         |
| 169Tm (KED) | 0.001 ppb             | 259 cps           | 6.6 %         |
| 174Yb (KED) | 0.006 ppb             | 618 cps           | 2.7 %         |
| 175Lu (KED) | -0.128 ppb            | 17,863 cps        | 3.0 %         |
| 205Tl (KED) | 0.003 ppb             | 538 cps           | 6.9 %         |
| 208Pb (KED) | 0.223 ppb             | 37,330 cps        | 2.2 %         |
| 209Bi (KED) | 100.292 %             | 3,703,847 cps     | 1.7 %         |
| 232Th (KED) | 0.041 ppb             | 10,965 cps        | 0.9 %         |
| 238U (KED)  | 0.008 ppb             | 2,649 cps         | 1.7 %         |

## Sample Summary

Instrument ID: iCAP Q

Analysis index: 29

Analysis name: 191079ti

Analysis started at: 10/18/2021 4:51:09 PM

User name: WINDOWS-UPCI4ER\Administrator

| Category    | Concentration average | Concentration RSD |
|-------------|-----------------------|-------------------|
| 6Li (KED)   | 105.857 %             | 2.6 %             |
| 9Be (KED)   | 0.000 ppb             |                   |
| 11B (KED)   | -0.335 ppb            | 65.2 %            |
| 24Mg (KED)  | 82.269 ppb            | 2.5 %             |
| 27Al (KED)  | 46.233 ppb            | 3.0 %             |
| 45Sc (KED)  | 113.220 %             | 0.3 %             |
| 51V (KED)   | 0.077 ppb             | 1.5 %             |
| 52Cr (KED)  | 0.507 ppb             | 3.0 %             |
| 55Mn (KED)  | 1.807 ppb             | 3.0 %             |
| 56Fe (KED)  | 68.105 ppb            | 0.2 %             |
| 58Ni (KED)  | 0.375 ppb             | 3.4 %             |
| 59Co (KED)  | 0.051 ppb             | 3.3 %             |
| 63Cu (KED)  | 2.304 ppb             | 2.9 %             |
| 64Zn (KED)  | 49.486 ppb            | 1.6 %             |
| 69Ga (KED)  | 0.283 ppb             | 4.7 %             |
| 75As (KED)  | 0.041 ppb             | 13.1 %            |
| 80Se (KED)  | 0.429 ppb             | 26.9 %            |
| 85Rb (KED)  | 0.443 ppb             | 0.9 %             |
| 88Sr (KED)  | 1.458 ppb             | 2.0 %             |
| 89Y (KED)   | 109.700 %             | 1.8 %             |
| 107Ag (KED) | 0.008 ppb             | 5.2 %             |
| 114Cd (KED) | 0.010 ppb             | 5.3 %             |
| 115In (KED) | 105.344 %             | 0.1 %             |
| 133Cs (KED) | 0.008 ppb             | 2.7 %             |
| 138Ba (KED) | 0.915 ppb             | 2.9 %             |
| 139La (KED) | 0.041 ppb             | 4.9 %             |
| 140Ce (KED) | 0.086 ppb             | 4.5 %             |
| 141Pr (KED) | 0.010 ppb             | 7.9 %             |
| 142Nd (KED) | 0.056 ppb             | 3.3 %             |
| 152Sm (KED) | 0.007 ppb             | 11.2 %            |
| 153Eu (KED) | 0.001 ppb             | 8.5 %             |
| 158Gd (KED) | 0.006 ppb             | 6.5 %             |
| 159Tb (KED) | 111.361 %             | 2.3 %             |
| 164Dy (KED) | 0.004 ppb             | 10.9 %            |
| 166Er (KED) | -0.002 ppb            | 28.6 %            |
| 169Tm (KED) | 0.000 ppb             | 45.0 %            |
| 174Yb (KED) | 0.002 ppb             | 10.0 %            |
| 175Lu (KED) | -0.131 ppb            | 3.2 %             |
| 205Tl (KED) | 0.001 ppb             | 13.0 %            |
| 208Pb (KED) | 0.590 ppb             | 1.9 %             |
| 209Bi (KED) | 100.498 %             | 1.3 %             |
| 232Th (KED) | 0.014 ppb             | 4.0 %             |
| 238U (KED)  | 0.004 ppb             | 7.4 %             |

| Category   | Concentration average | Intensity average | Intensity RSD |
|------------|-----------------------|-------------------|---------------|
| 6Li (KED)  | 105.857 %             | 3,174 cps         | 2.6 %         |
| 9Be (KED)  | 0.000 ppb             | 0 cps             |               |
| 11B (KED)  | -0.335 ppb            | 474 cps           | 4.9 %         |
| 24Mg (KED) | 82.269 ppb            | 48,391 cps        | 0.4 %         |
| 27Al (KED) | 46.233 ppb            | 7,189 cps         | 3.3 %         |

| Category    | Concentration average | Intensity average | Intensity RSD |
|-------------|-----------------------|-------------------|---------------|
| 45Sc (KED)  | 113.220 %             | 53,064 cps        | 0.3 %         |
| 51V (KED)   | 0.077 ppb             | 718 cps           | 1.5 %         |
| 52Cr (KED)  | 0.507 ppb             | 7,441 cps         | 3.2 %         |
| 55Mn (KED)  | 1.807 ppb             | 13,399 cps        | 3.3 %         |
| 56Fe (KED)  | 68.105 ppb            | 915,459 cps       | 0.5 %         |
| 58Ni (KED)  | 0.375 ppb             | 6,884 cps         | 2.9 %         |
| 59Co (KED)  | 0.051 ppb             | 1,481 cps         | 3.4 %         |
| 63Cu (KED)  | 2.304 ppb             | 58,862 cps        | 0.6 %         |
| 64Zn (KED)  | 49.486 ppb            | 325,693 cps       | 0.7 %         |
| 69Ga (KED)  | 0.283 ppb             | 2,039 cps         | 6.1 %         |
| 75As (KED)  | 0.041 ppb             | 89 cps            | 12.1 %        |
| 80Se (KED)  | 0.429 ppb             | 1,398 cps         | 4.7 %         |
| 85Rb (KED)  | 0.443 ppb             | 2,876 cps         | 2.5 %         |
| 88Sr (KED)  | 1.458 ppb             | 13,376 cps        | 2.1 %         |
| 89Y (KED)   | 109.700 %             | 471,859 cps       | 1.8 %         |
| 107Ag (KED) | 0.008 ppb             | 481 cps           | 4.6 %         |
| 114Cd (KED) | 0.010 ppb             | 312 cps           | 3.7 %         |
| 115In (KED) | 105.344 %             | 850,852 cps       | 0.1 %         |
| 133Cs (KED) | 0.008 ppb             | 273 cps           | 2.4 %         |
| 138Ba (KED) | 0.915 ppb             | 41,718 cps        | 0.5 %         |
| 139La (KED) | 0.041 ppb             | 3,902 cps         | 3.1 %         |
| 140Ce (KED) | 0.086 ppb             | 11,353 cps        | 2.0 %         |
| 141Pr (KED) | 0.010 ppb             | 1,381 cps         | 5.9 %         |
| 142Nd (KED) | 0.056 ppb             | 3,006 cps         | 4.8 %         |
| 152Sm (KED) | 0.007 ppb             | 342 cps           | 12.2 %        |
| 153Eu (KED) | 0.001 ppb             | 141 cps           | 8.9 %         |
| 158Gd (KED) | 0.006 ppb             | 431 cps           | 8.3 %         |
| 159Tb (KED) | 111.361 %             | 4,507,281 cps     | 2.3 %         |
| 164Dy (KED) | 0.004 ppb             | 322 cps           | 8.3 %         |
| 166Er (KED) | -0.002 ppb            | 416 cps           | 14.8 %        |
| 169Tm (KED) | 0.000 ppb             | 86 cps            | 23.8 %        |
| 174Yb (KED) | 0.002 ppb             | 227 cps           | 6.4 %         |
| 175Lu (KED) | -0.131 ppb            | 17,537 cps        | 3.7 %         |
| 205Tl (KED) | 0.001 ppb             | 251 cps           | 10.7 %        |
| 208Pb (KED) | 0.590 ppb             | 86,646 cps        | 3.0 %         |
| 209Bi (KED) | 100.498 %             | 3,711,465 cps     | 1.3 %         |
| 232Th (KED) | 0.014 ppb             | 3,761 cps         | 2.6 %         |
| 238U (KED)  | 0.004 ppb             | 1,248 cps         | 5.3 %         |

## Sample Summary

Instrument ID: iCAP Q

Analysis index: 30

Analysis name: 1806100ti

Analysis started at: 10/18/2021 4:55:03 PM

User name: WINDOWS-UPCI4ER\Administrator

| Category    | Concentration average | Concentration RSD |
|-------------|-----------------------|-------------------|
| 6Li (KED)   | 36.061 %              | 6.1 %             |
| 9Be (KED)   | 0.037 ppb             | 87.1 %            |
| 11B (KED)   | 23.170 ppb            | 6.4 %             |
| 24Mg (KED)  | 269.324 ppb           | 6.2 %             |
| 27Al (KED)  | 184.301 ppb           | 2.1 %             |
| 45Sc (KED)  | 36.259 %              | 2.4 %             |
| 51V (KED)   | 0.323 ppb             | 7.0 %             |
| 52Cr (KED)  | 1.422 ppb             | 3.9 %             |
| 55Mn (KED)  | 7.135 ppb             | 0.9 %             |
| 56Fe (KED)  | 305.114 ppb           | 2.6 %             |
| 58Ni (KED)  | 1.883 ppb             | 4.2 %             |
| 59Co (KED)  | 0.150 ppb             | 6.9 %             |
| 63Cu (KED)  | 5.316 ppb             | 1.3 %             |
| 64Zn (KED)  | 159.219 ppb           | 2.3 %             |
| 69Ga (KED)  | 0.955 ppb             | 7.8 %             |
| 75As (KED)  | 0.210 ppb             | 32.7 %            |
| 80Se (KED)  | 5.405 ppb             | 5.0 %             |
| 85Rb (KED)  | 1.468 ppb             | 8.1 %             |
| 88Sr (KED)  | 6.400 ppb             | 1.8 %             |
| 89Y (KED)   | 34.615 %              | 1.6 %             |
| 107Ag (KED) | 0.077 ppb             | 2.0 %             |
| 114Cd (KED) | 0.023 ppb             | 18.3 %            |
| 115In (KED) | 33.758 %              | 0.3 %             |
| 133Cs (KED) | 0.039 ppb             | 7.9 %             |
| 138Ba (KED) | 3.223 ppb             | 1.3 %             |
| 139La (KED) | 0.166 ppb             | 2.0 %             |
| 140Ce (KED) | 0.365 ppb             | 1.7 %             |
| 141Pr (KED) | 0.040 ppb             | 2.0 %             |
| 142Nd (KED) | 0.224 ppb             | 2.2 %             |
| 152Sm (KED) | 0.030 ppb             | 6.0 %             |
| 153Eu (KED) | 0.005 ppb             | 1.2 %             |
| 158Gd (KED) | 0.028 ppb             | 3.4 %             |
| 159Tb (KED) | 35.052 %              | 1.1 %             |
| 164Dy (KED) | 0.018 ppb             | 4.2 %             |
| 166Er (KED) | 0.005 ppb             | 14.4 %            |
| 169Tm (KED) | 0.001 ppb             | 13.6 %            |
| 174Yb (KED) | 0.008 ppb             | 11.1 %            |
| 175Lu (KED) | -0.131 ppb            | 3.9 %             |
| 205Tl (KED) | 0.004 ppb             | 20.6 %            |
| 208Pb (KED) | 0.429 ppb             | 1.3 %             |
| 209Bi (KED) | 32.348 %              | 0.3 %             |
| 232Th (KED) | 0.046 ppb             | 3.0 %             |
| 238U (KED)  | 0.011 ppb             | 2.6 %             |

| Category   | Concentration average | Intensity average | Intensity RSD |
|------------|-----------------------|-------------------|---------------|
| 6Li (KED)  | 36.061 %              | 1,081 cps         | 6.1 %         |
| 9Be (KED)  | 0.037 ppb             | 2 cps             | 86.6 %        |
| 11B (KED)  | 23.170 ppb            | 927 cps           | 4.0 %         |
| 24Mg (KED) | 269.324 ppb           | 53,772 cps        | 0.1 %         |
| 27Al (KED) | 184.301 ppb           | 9,112 cps         | 0.6 %         |

| Category    | Concentration average | Intensity average | Intensity RSD |
|-------------|-----------------------|-------------------|---------------|
| 45Sc (KED)  | 36.259 %              | 16,994 cps        | 2.4 %         |
| 51V (KED)   | 0.323 ppb             | 956 cps           | 5.3 %         |
| 52Cr (KED)  | 1.422 ppb             | 6,626 cps         | 1.6 %         |
| 55Mn (KED)  | 7.135 ppb             | 16,897 cps        | 1.7 %         |
| 56Fe (KED)  | 305.114 ppb           | 1,310,472 cps     | 0.8 %         |
| 58Ni (KED)  | 1.883 ppb             | 10,678 cps        | 1.9 %         |
| 59Co (KED)  | 0.150 ppb             | 1,373 cps         | 4.8 %         |
| 63Cu (KED)  | 5.316 ppb             | 38,679 cps        | 0.6 %         |
| 64Zn (KED)  | 159.219 ppb           | 328,055 cps       | 0.7 %         |
| 69Ga (KED)  | 0.955 ppb             | 2,117 cps         | 6.4 %         |
| 75As (KED)  | 0.210 ppb             | 122 cps           | 30.0 %        |
| 80Se (KED)  | 5.405 ppb             | 1,386 cps         | 3.5 %         |
| 85Rb (KED)  | 1.468 ppb             | 2,997 cps         | 6.5 %         |
| 88Sr (KED)  | 6.400 ppb             | 18,408 cps        | 0.3 %         |
| 89Y (KED)   | 34.615 %              | 148,890 cps       | 1.6 %         |
| 107Ag (KED) | 0.077 ppb             | 1,423 cps         | 1.8 %         |
| 114Cd (KED) | 0.023 ppb             | 190 cps           | 15.3 %        |
| 115In (KED) | 33.758 %              | 272,662 cps       | 0.3 %         |
| 133Cs (KED) | 0.039 ppb             | 394 cps           | 7.6 %         |
| 138Ba (KED) | 3.223 ppb             | 45,057 cps        | 1.1 %         |
| 139La (KED) | 0.166 ppb             | 4,968 cps         | 1.1 %         |
| 140Ce (KED) | 0.365 ppb             | 14,764 cps        | 1.3 %         |
| 141Pr (KED) | 0.040 ppb             | 1,685 cps         | 0.9 %         |
| 142Nd (KED) | 0.224 ppb             | 3,768 cps         | 2.8 %         |
| 152Sm (KED) | 0.030 ppb             | 452 cps           | 6.8 %         |
| 153Eu (KED) | 0.005 ppb             | 173 cps           | 0.0 %         |
| 158Gd (KED) | 0.028 ppb             | 573 cps           | 2.3 %         |
| 159Tb (KED) | 35.052 %              | 1,418,714 cps     | 1.1 %         |
| 164Dy (KED) | 0.018 ppb             | 426 cps           | 3.5 %         |
| 166Er (KED) | 0.005 ppb             | 329 cps           | 7.2 %         |
| 169Tm (KED) | 0.001 ppb             | 108 cps           | 11.7 %        |
| 174Yb (KED) | 0.008 ppb             | 266 cps           | 11.6 %        |
| 175Lu (KED) | -0.131 ppb            | 5,533 cps         | 4.4 %         |
| 205Tl (KED) | 0.004 ppb             | 251 cps           | 19.9 %        |
| 208Pb (KED) | 0.429 ppb             | 20,939 cps        | 1.3 %         |
| 209Bi (KED) | 32.348 %              | 1,194,630 cps     | 0.3 %         |
| 232Th (KED) | 0.046 ppb             | 3,960 cps         | 2.8 %         |
| 238U (KED)  | 0.011 ppb             | 1,162 cps         | 2.7 %         |
