# Supplementary material for: Geographic and breed-specific traceability of cashmere via mineral element profiling in Inner Mongolia (Ordos, Chifeng, and Alxa League)
Source: Royal Society of Chemistry journal article supplement (doi:10.1039/d5ra08122j), 2026-01-01
Supplement: d5ra08122j1.zip [file 20211020-min gai (1-23)+min gai (1-21).pdf › ԭʼ޿/20211020-min gai (1-23)+min gai (1-21).pdf]

## Instrument Summary:

Instrument ID: iCAP Q  
Serial Number: Undefined

## Labbook Summary:

Path and filename: \_Application Data\Workspace\LabBooks\wlw\20211020-1.imexp  
Labbook created by: Administrator  
Based on template:  
Hardware configuration: iCAPQ1  
Labbook type: eQuant  
Qtegra version (last saved): 2.7.2425.154  
Labbook started: 10/20/2021 3:37:28 PM  
Labbook finished: 10/20/2021 6:11:14 PM

## Method Summary:

| Isotope     | Mode | Dwell time (s) | # of Channels | Spacing | Resolution | IS          |
|-------------|------|----------------|---------------|---------|------------|-------------|
| 6Li (KED)   | KED  | 0.03           | 3             | 0.1     | Normal     |             |
| 9Be (KED)   | KED  | 0.03           | 3             | 0.1     | Normal     | 6Li (KED)   |
| 11B (KED)   | KED  | 0.03           | 3             | 0.1     | Normal     | 6Li (KED)   |
| 24Mg (KED)  | KED  | 0.03           | 3             | 0.1     | Normal     | 6Li (KED)   |
| 27Al (KED)  | KED  | 0.03           | 3             | 0.1     | Normal     | 45Sc (KED)  |
| 45Sc (KED)  | KED  | 0.03           | 3             | 0.1     | Normal     |             |
| 51V (KED)   | KED  | 0.03           | 3             | 0.1     | Normal     | 45Sc (KED)  |
| 52Cr (KED)  | KED  | 0.03           | 3             | 0.1     | Normal     | 45Sc (KED)  |
| 55Mn (KED)  | KED  | 0.03           | 3             | 0.1     | Normal     | 45Sc (KED)  |
| 56Fe (KED)  | KED  | 0.03           | 3             | 0.1     | Normal     | 45Sc (KED)  |
| 58Ni (KED)  | KED  | 0.03           | 3             | 0.1     | Normal     | 45Sc (KED)  |
| 59Co (KED)  | KED  | 0.03           | 3             | 0.1     | Normal     | 45Sc (KED)  |
| 63Cu (KED)  | KED  | 0.03           | 3             | 0.1     | Normal     | 89Y (KED)   |
| 64Zn (KED)  | KED  | 0.03           | 3             | 0.1     | Normal     | 89Y (KED)   |
| 69Ga (KED)  | KED  | 0.03           | 3             | 0.1     | Normal     | 89Y (KED)   |
| 75As (KED)  | KED  | 0.03           | 3             | 0.1     | Normal     | 89Y (KED)   |
| 80Se (KED)  | KED  | 0.03           | 3             | 0.1     | Normal     | 89Y (KED)   |
| 85Rb (KED)  | KED  | 0.03           | 3             | 0.1     | Normal     | 89Y (KED)   |
| 88Sr (KED)  | KED  | 0.03           | 3             | 0.1     | Normal     | 89Y (KED)   |
| 89Y (KED)   | KED  | 0.03           | 3             | 0.1     | Normal     |             |
| 107Ag (KED) | KED  | 0.03           | 3             | 0.1     | Normal     | 115In (KED) |
| 114Cd (KED) | KED  | 0.03           | 3             | 0.1     | Normal     | 115In (KED) |
| 115In (KED) | KED  | 0.03           | 3             | 0.1     | Normal     |             |
| 133Cs (KED) | KED  | 0.03           | 3             | 0.1     | Normal     | 115In (KED) |
| 138Ba (KED) | KED  | 0.03           | 3             | 0.1     | Normal     | 159Tb (KED) |
| 139La (KED) | KED  | 0.03           | 3             | 0.1     | Normal     | 159Tb (KED) |
| 140Ce (KED) | KED  | 0.03           | 3             | 0.1     | Normal     | 159Tb (KED) |
| 141Pr (KED) | KED  | 0.03           | 3             | 0.1     | Normal     | 159Tb (KED) |
| 142Nd (KED) | KED  | 0.03           | 3             | 0.1     | Normal     | 159Tb (KED) |
| 152Sm (KED) | KED  | 0.03           | 3             | 0.1     | Normal     | 159Tb (KED) |
| 153Eu (KED) | KED  | 0.03           | 3             | 0.1     | Normal     | 159Tb (KED) |
| 158Gd (KED) | KED  | 0.03           | 3             | 0.1     | Normal     | 159Tb (KED) |
| 159Tb (KED) | KED  | 0.03           | 3             | 0.1     | Normal     |             |
| 164Dy (KED) | KED  | 0.03           | 3             | 0.1     | Normal     | 159Tb (KED) |
| 166Er (KED) | KED  | 0.03           | 3             | 0.1     | Normal     | 159Tb (KED) |
| 169Tm (KED) | KED  | 0.03           | 3             | 0.1     | Normal     | 159Tb (KED) |
| 174Yb (KED) | KED  | 0.03           | 3             | 0.1     | Normal     | 159Tb (KED) |
| 175Lu (KED) | KED  | 0.03           | 3             | 0.1     | Normal     | 159Tb (KED) |
| 205Tl (KED) | KED  | 0.03           | 3             | 0.1     | Normal     | 209Bi (KED) |
| 208Pb (KED) | KED  | 0.03           | 3             | 0.1     | Normal     | 209Bi (KED) |
| 209Bi (KED) | KED  | 0.03           | 3             | 0.1     | Normal     |             |
| 232Th (KED) | KED  | 0.03           | 3             | 0.1     | Normal     | 209Bi (KED) |
| 238U (KED)  | KED  | 0.03           | 3             | 0.1     | Normal     | 209Bi (KED) |

| Isotope     | Mode | Dwell time (s) | # of Channels | Spacing | Resolution |
|-------------|------|----------------|---------------|---------|------------|
| 6Li (KED)   | KED  | 0.03           | 3             | 0.1     | Normal     |
| 45Sc (KED)  | KED  | 0.03           | 3             | 0.1     | Normal     |
| 89Y (KED)   | KED  | 0.03           | 3             | 0.1     | Normal     |
| 115In (KED) | KED  | 0.03           | 3             | 0.1     | Normal     |
| 159Tb (KED) | KED  | 0.03           | 3             | 0.1     | Normal     |
| 209Bi (KED) | KED  | 0.03           | 3             | 0.1     | Normal     |

| No. of sweeps | Time per sweep[s] | Time per main run[s] |
|---------------|-------------------|----------------------|
| 10            | 3.87              | 38.7                 |

## Calibration Curves:

9Be (KED)

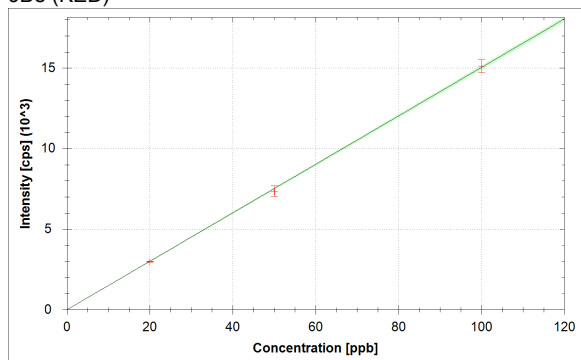

$$f(x) = 150.3300 \cdot x + 0.9877$$

$$R^2 = 0.9998$$

$$\text{BEC} = 0.007 \text{ ppb}$$

$$\text{LoD} = 0.0000 \text{ ppb}$$

11B (KED)

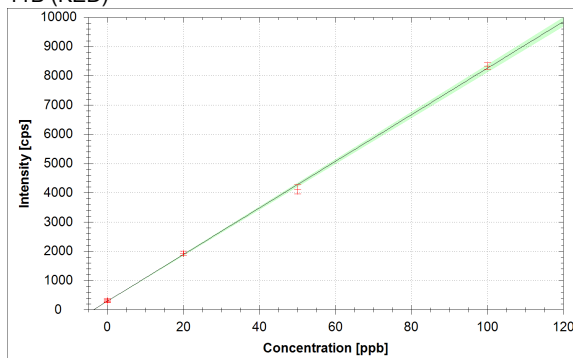

$$f(x) = 79.6607 \cdot x + 292.7883$$

$$R^2 = 0.9992$$

$$\text{BEC} = 3.675 \text{ ppb}$$

$$\text{LoD} = 2.2970 \text{ ppb}$$

24Mg (KED)

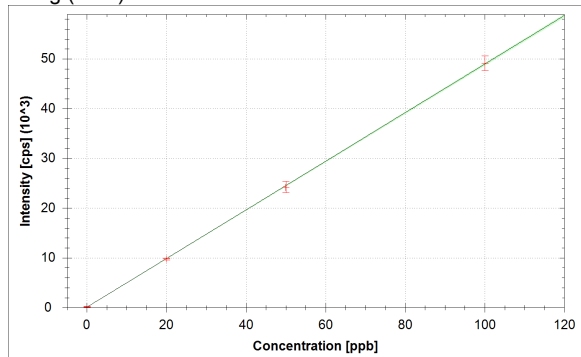

$$f(x) = 488.6312 \cdot x + 84.5955$$

$$R^2 = 0.9999$$

$$\text{BEC} = 0.173 \text{ ppb}$$

$$\text{LoD} = 0.3212 \text{ ppb}$$

27Al (KED)

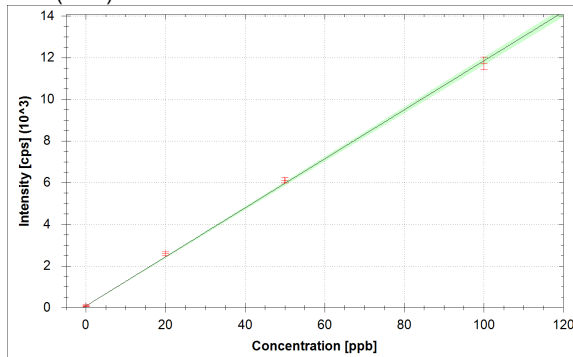

$$f(x) = 117.6172 \cdot x + 77.0852$$

$$R^2 = 0.9993$$

$$\text{BEC} = 0.655 \text{ ppb}$$

$$\text{LoD} = 1.1447 \text{ ppb}$$

51V (KED)

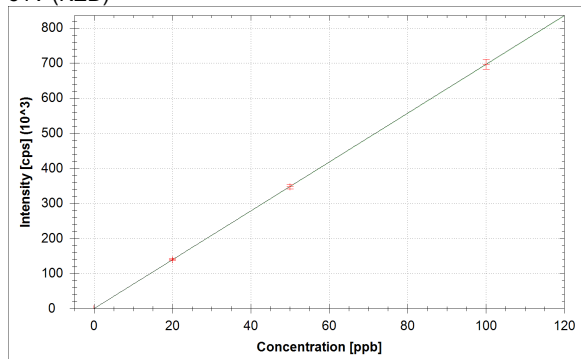

$$f(x) = 6965.1448 \cdot x + 4.5457$$

$$R^2 = 1.0000$$

$$\text{BEC} = 0.001 \text{ ppb}$$

$$\text{LoD} = 0.0005 \text{ ppb}$$

52Cr (KED)

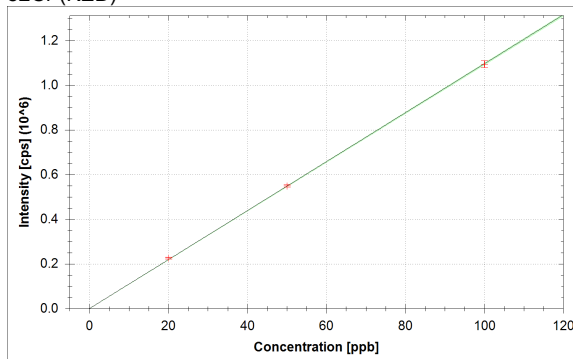

$$f(x) = 10959.6435 \cdot x + 53.5119$$

$$R^2 = 0.9999$$

$$\text{BEC} = 0.005 \text{ ppb}$$

$$\text{LoD} = 0.0054 \text{ ppb}$$

55Mn (KED)

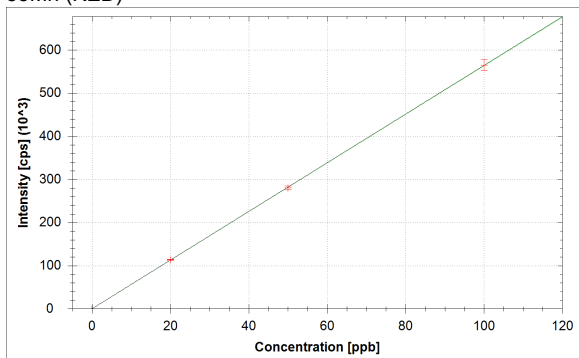

$$f(x) = 5641.0756 \cdot x + 38.0521$$

$$R^2 = 1.0000$$

$$\text{BEC} = 0.007 \text{ ppb}$$

$$\text{LoD} = 0.0115 \text{ ppb}$$

56Fe (KED)

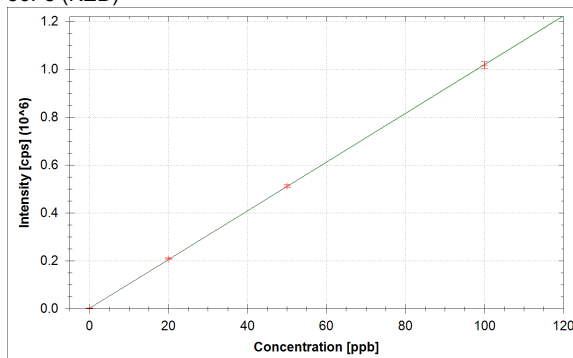

$$f(x) = 10179.3748 \cdot x + 1649.1066$$

$$R^2 = 1.0000$$

$$\text{BEC} = 0.162 \text{ ppb}$$

$$\text{LoD} = 0.1381 \text{ ppb}$$

58Ni (KED)

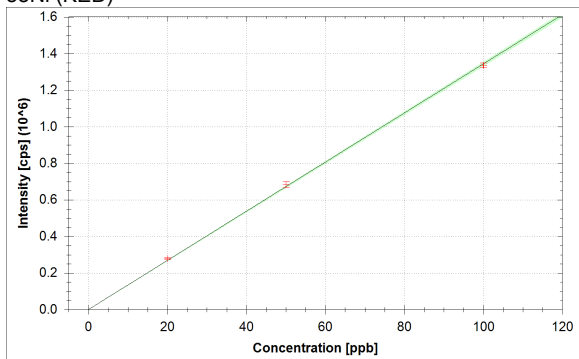

$$f(x) = 13436.7108 \cdot x + 290.2889$$

$$R^2 = 0.9998$$

$$\text{BEC} = 0.022 \text{ ppb}$$

$$\text{LoD} = 0.0121 \text{ ppb}$$

59Co (KED)

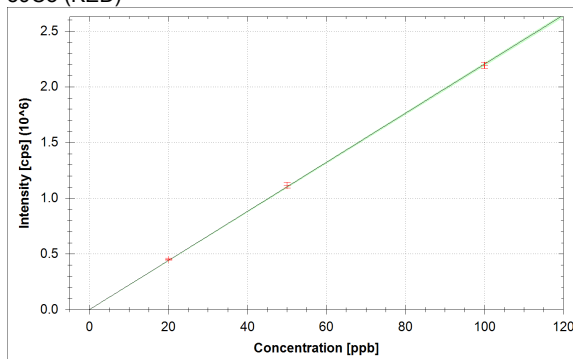

$$f(x) = 22023.4369 \cdot x + 23.5860$$

$$R^2 = 0.9999$$

$$\text{BEC} = 0.001 \text{ ppb}$$

$$\text{LoD} = 0.0012 \text{ ppb}$$

63Cu (KED)

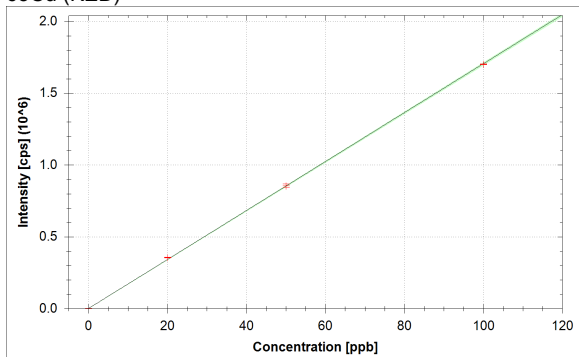

$$f(x) = 17046.4339 \cdot x + 660.3821$$

$$R^2 = 0.9999$$

$$\text{BEC} = 0.039 \text{ ppb}$$

$$\text{LoD} = 0.2056 \text{ ppb}$$

64Zn (KED)

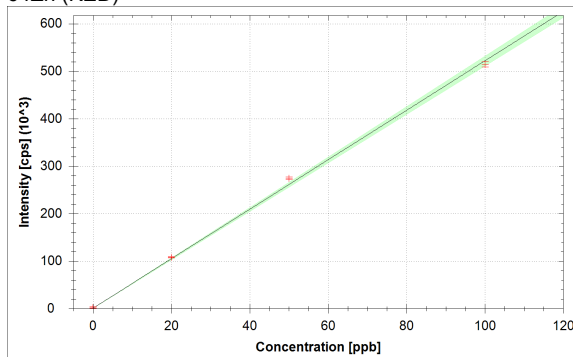

$$f(x) = 5212.2088 \cdot x + 828.9371$$

$$R^2 = 0.9987$$

$$\text{BEC} = 0.159 \text{ ppb}$$

$$\text{LoD} = 1.0351 \text{ ppb}$$

69Ga (KED)

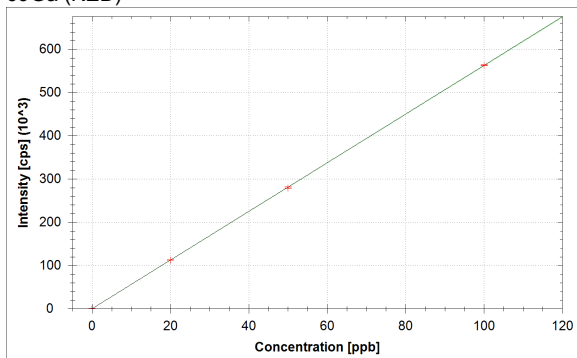

$$f(x) = 5624.4468x + 69.5491$$

$$R^2 = 1.0000$$

$$\text{BEC} = 0.012 \text{ ppb}$$

$$\text{LoD} = 0.0562 \text{ ppb}$$

75As (KED)

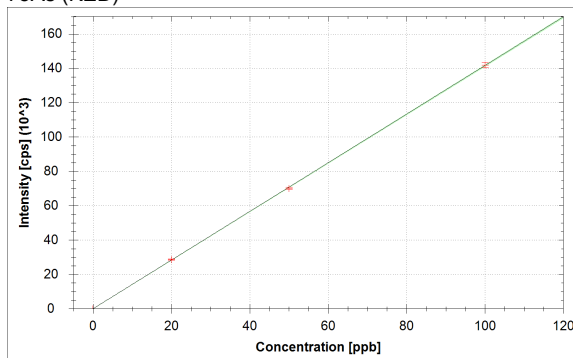

$$f(x) = 1415.5941x + 17.3832$$

$$R^2 = 1.0000$$

$$\text{BEC} = 0.012 \text{ ppb}$$

$$\text{LoD} = 0.0132 \text{ ppb}$$

80Se (KED)

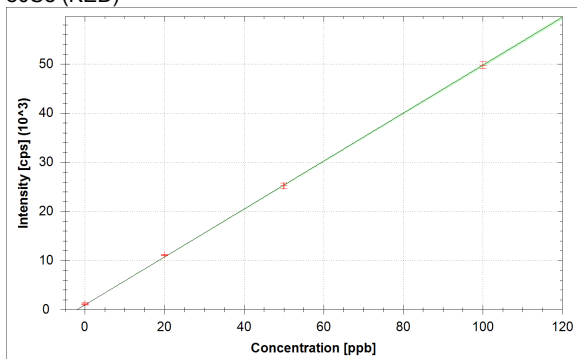

$$f(x) = 488.1072x + 939.7962$$

$$R^2 = 0.9999$$

$$\text{BEC} = 1.925 \text{ ppb}$$

$$\text{LoD} = 1.4472 \text{ ppb}$$

85Rb (KED)

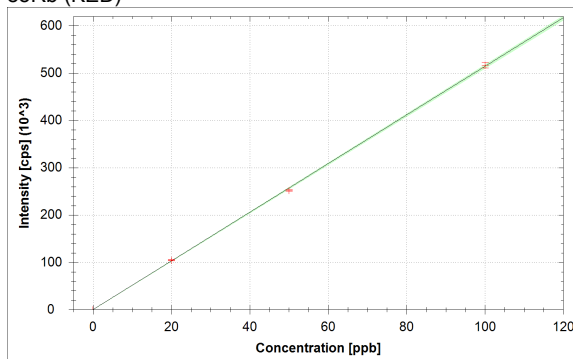

$$f(x) = 5142.8909x + 13.7286$$

$$R^2 = 0.9998$$

$$\text{BEC} = 0.003 \text{ ppb}$$

$$\text{LoD} = 0.0070 \text{ ppb}$$

88Sr (KED)

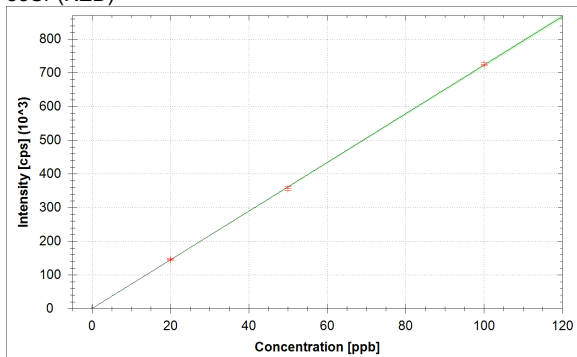

$$f(x) = 7226.3080x + 172.0551$$

$$R^2 = 0.9999$$

$$\text{BEC} = 0.024 \text{ ppb}$$

$$\text{LoD} = 0.0083 \text{ ppb}$$

107Ag (KED)

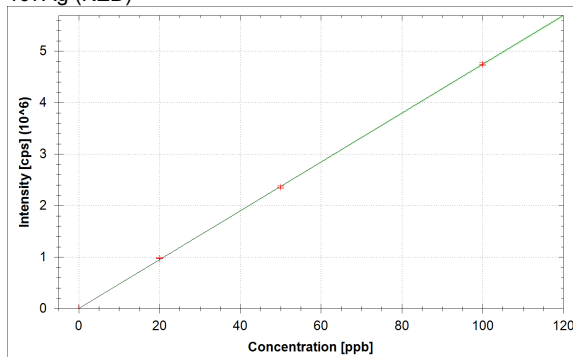

$$f(x) = 47438.8466x + 12.8161$$

$$R^2 = 0.9999$$

$$\text{BEC} = 0.000 \text{ ppb}$$

$$\text{LoD} = 0.0004 \text{ ppb}$$

# Comprehensive

10/20/2021 6:11:31 PM

**<sup>114</sup>Cd (KED)**

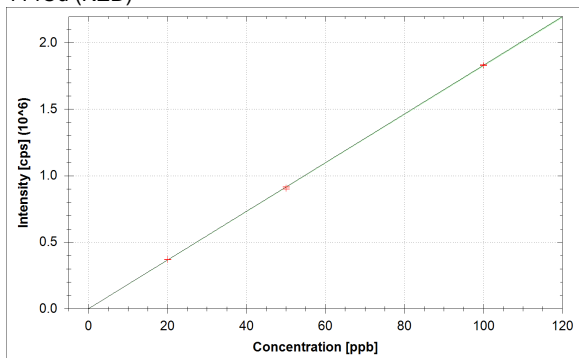

$$f(x) = 18290.0049 \cdot x + 45.7965$$

$$R^2 = 1.0000$$

$$\text{BEC} = 0.003 \text{ ppb}$$

$$\text{LoD} = 0.0038 \text{ ppb}$$

**<sup>133</sup>Cs (KED)**

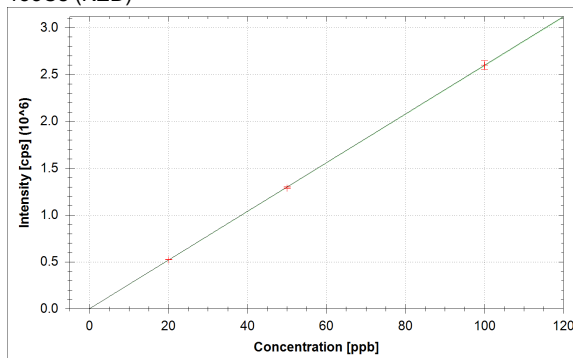

$$f(x) = 25962.2994 \cdot x + 15.5677$$

$$R^2 = 1.0000$$

$$\text{BEC} = 0.001 \text{ ppb}$$

$$\text{LoD} = 0.0013 \text{ ppb}$$

**<sup>138</sup>Ba (KED)**

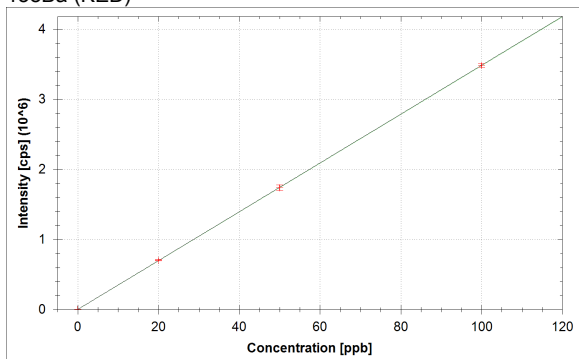

$$f(x) = 34843.8097 \cdot x + 1393.0260$$

$$R^2 = 1.0000$$

$$\text{BEC} = 0.040 \text{ ppb}$$

$$\text{LoD} = 0.0800 \text{ ppb}$$

**<sup>139</sup>La (KED)**

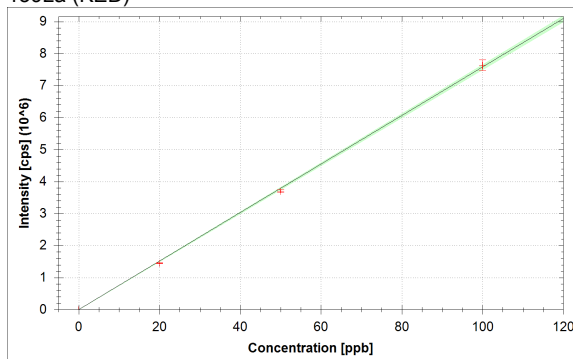

$$f(x) = 75801.0521 \cdot x + 27.1423$$

$$R^2 = 0.9996$$

$$\text{BEC} = 0.000 \text{ ppb}$$

$$\text{LoD} = 0.0006 \text{ ppb}$$

**<sup>140</sup>Ce (KED)**

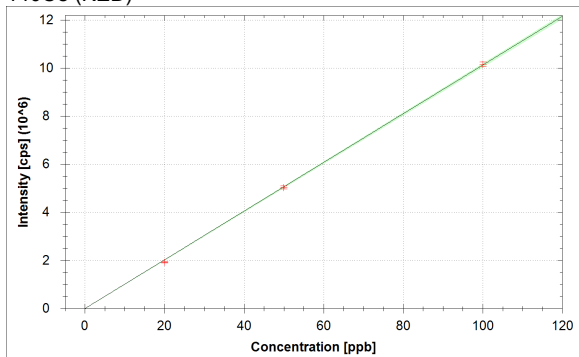

$$f(x) = 101252.0441 \cdot x + 95.0632$$

$$R^2 = 0.9998$$

$$\text{BEC} = 0.001 \text{ ppb}$$

$$\text{LoD} = 0.0015 \text{ ppb}$$

**<sup>141</sup>Pr (KED)**

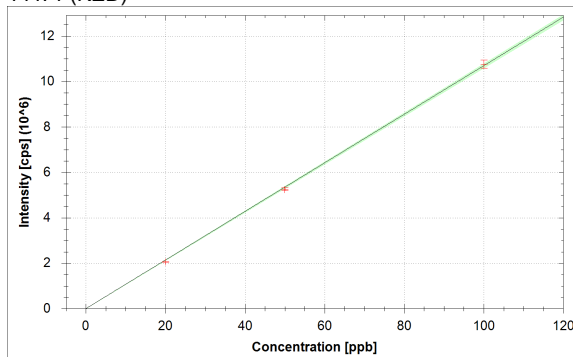

$$f(x) = 106942.5426 \cdot x + 3.7364$$

$$R^2 = 0.9997$$

$$\text{BEC} = 0.000 \text{ ppb}$$

$$\text{LoD} = 0.0003 \text{ ppb}$$

**<sup>142</sup>Nd (KED)**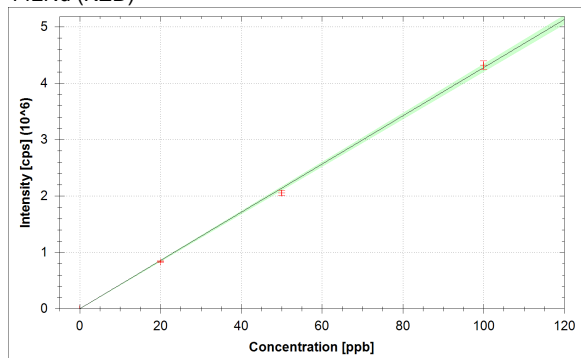

$$f(x) = 42734.3073 \cdot x + 16.7401$$

$$R^2 = 0.9993$$

$$\text{BEC} = 0.000 \text{ ppb}$$

$$\text{LoD} = 0.0004 \text{ ppb}$$

**<sup>152</sup>Sm (KED)**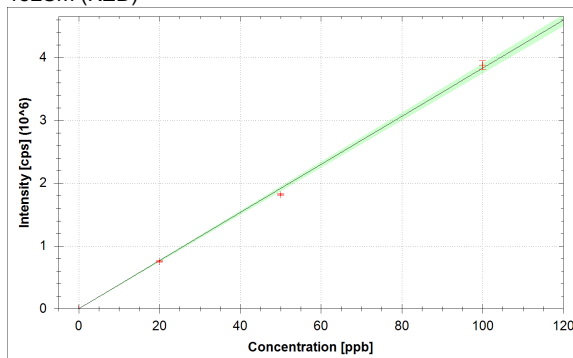

$$f(x) = 38286.6297 \cdot x + 2.7956$$

$$R^2 = 0.9989$$

$$\text{BEC} = 0.000 \text{ ppb}$$

$$\text{LoD} = 0.0004 \text{ ppb}$$

**<sup>153</sup>Eu (KED)**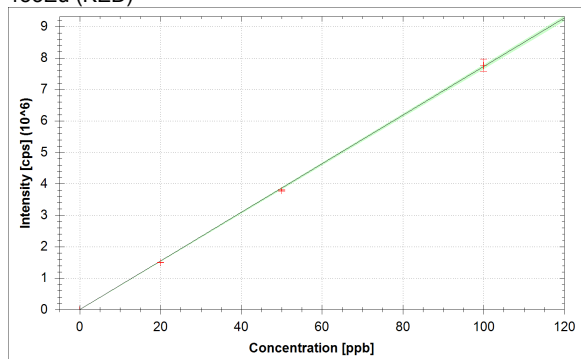

$$f(x) = 77250.3315 \cdot x + 5.5843$$

$$R^2 = 0.9998$$

$$\text{BEC} = 0.000 \text{ ppb}$$

$$\text{LoD} = 0.0002 \text{ ppb}$$

**<sup>158</sup>Gd (KED)**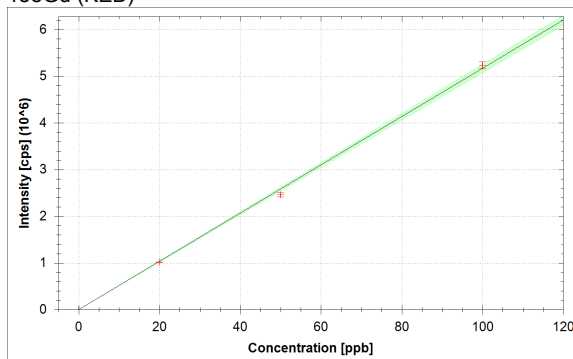

$$f(x) = 51702.8253 \cdot x + 7.4391$$

$$R^2 = 0.9990$$

$$\text{BEC} = 0.000 \text{ ppb}$$

$$\text{LoD} = 0.0004 \text{ ppb}$$

**<sup>164</sup>Dy (KED)**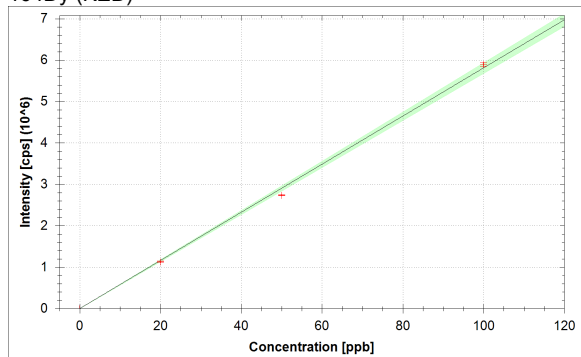

$$f(x) = 58091.9761 \cdot x + 19.6359$$

$$R^2 = 0.9985$$

$$\text{BEC} = 0.000 \text{ ppb}$$

$$\text{LoD} = 0.0004 \text{ ppb}$$

**<sup>166</sup>Er (KED)**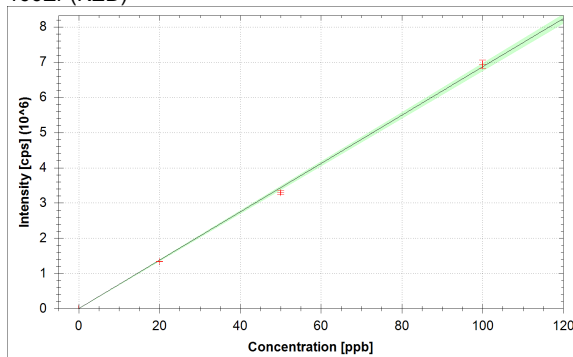

$$f(x) = 68627.5473 \cdot x + 439.9136$$

$$R^2 = 0.9992$$

$$\text{BEC} = 0.006 \text{ ppb}$$

$$\text{LoD} = 0.0026 \text{ ppb}$$

# Comprehensive

10/20/2021 6:11:31 PM

**<sup>169</sup>Tm (KED)**

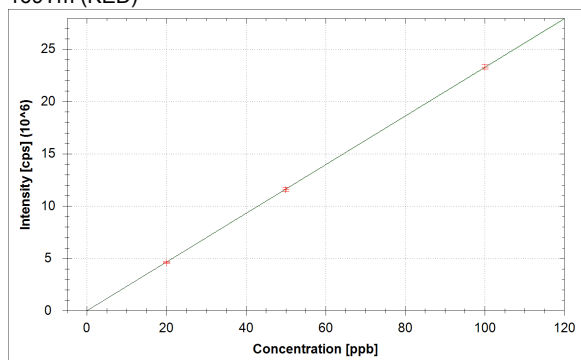

$$f(x) = 232590.7446 \cdot x + 4.6772$$

$$R^2 = 1.0000$$

$$\text{BEC} = 0.000 \text{ ppb}$$

$$\text{LoD} = 0.0001 \text{ ppb}$$

**<sup>174</sup>Yb (KED)**

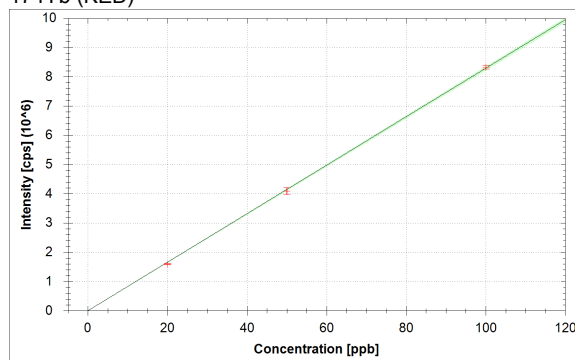

$$f(x) = 82885.4674 \cdot x + 23.3186$$

$$R^2 = 0.9998$$

$$\text{BEC} = 0.000 \text{ ppb}$$

$$\text{LoD} = 0.0002 \text{ ppb}$$

**<sup>175</sup>Lu (KED)**

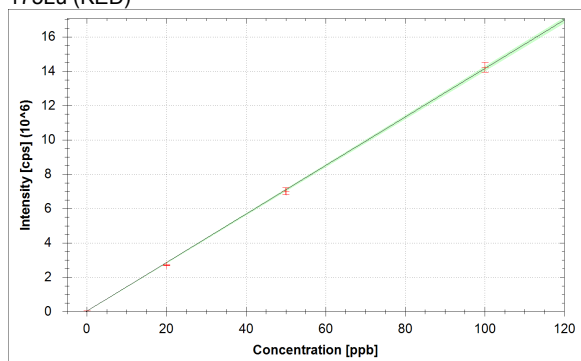

$$f(x) = 141241.6573 \cdot x + 29028.0452$$

$$R^2 = 0.9997$$

$$\text{BEC} = 0.206 \text{ ppb}$$

$$\text{LoD} = 0.0301 \text{ ppb}$$

**<sup>205</sup>Tl (KED)**

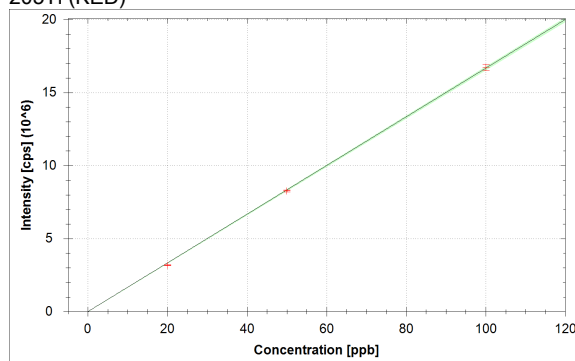

$$f(x) = 166664.3925 \cdot x + 13.9252$$

$$R^2 = 0.9998$$

$$\text{BEC} = 0.000 \text{ ppb}$$

$$\text{LoD} = 0.0001 \text{ ppb}$$

**<sup>208</sup>Pb (KED)**

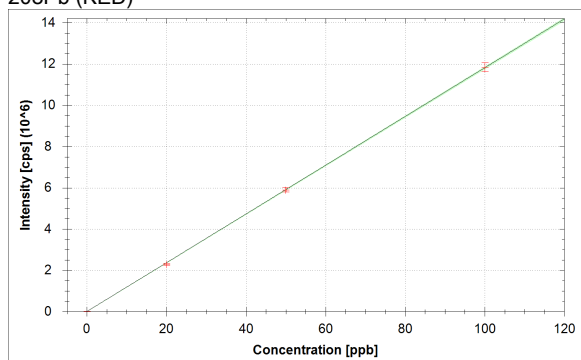

$$f(x) = 118141.5198 \cdot x + 4815.7484$$

$$R^2 = 0.9999$$

$$\text{BEC} = 0.041 \text{ ppb}$$

$$\text{LoD} = 0.0378 \text{ ppb}$$

**<sup>232</sup>Th (KED)**

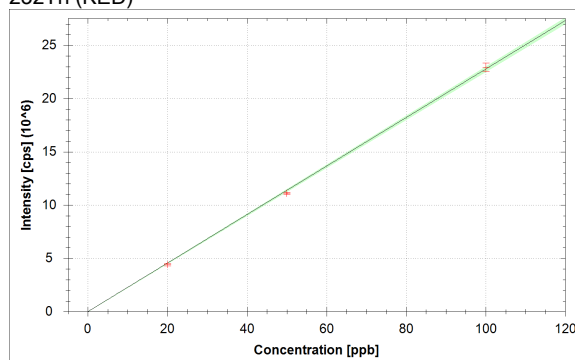

$$f(x) = 227687.6676 \cdot x + 68.7444$$

$$R^2 = 0.9997$$

$$\text{BEC} = 0.000 \text{ ppb}$$

$$\text{LoD} = 0.0004 \text{ ppb}$$

238U (KED)

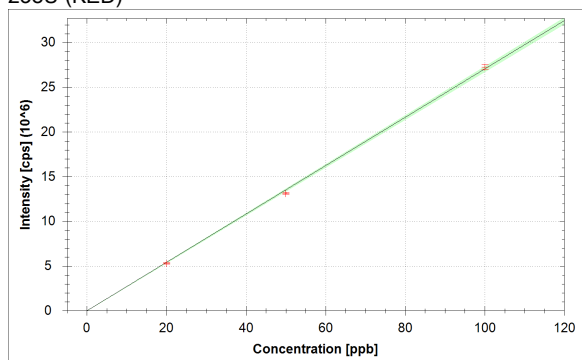

$$f(x) = 270497.8528 \cdot x + 77.0787$$

$$R^2 = 0.9996$$

$$\text{BEC} = 0.000 \text{ ppb}$$

$$\text{LoD} = 0.0002 \text{ ppb}$$

# Comprehensive

10/20/2021 6:11:31 PM

## Standards:

Analysis Index: 3  
Analysis Name: 0+20  
Analysis Type: STD  
Analysis Started at: 10/20/2021 3:44:15 PM  
Standard (Stock): std0  
Standard DF: 1

| Category    | Concentration average | Concentration RSD | Standard Concentration |
|-------------|-----------------------|-------------------|------------------------|
| 6Li (KED)   | 117.827 %             |                   |                        |
| 9Be (KED)   | 0.000 ppb             | 1.7 %             | 0.000 ppb              |
| 11B (KED)   | 0.000 ppb             | 0.2 %             | 0.000 ppb              |
| 24Mg (KED)  | 0.000 ppb             | 0.2 %             | 0.000 ppb              |
| 27Al (KED)  | 0.000 ppb             | 0.3 %             | 0.000 ppb              |
| 45Sc (KED)  | 122.504 %             |                   |                        |
| 51V (KED)   | 0.000 ppb             | 0.9 %             | 0.000 ppb              |
| 52Cr (KED)  | 0.000 ppb             | 0.2 %             | 0.000 ppb              |
| 55Mn (KED)  | 0.000 ppb             | 0.4 %             | 0.000 ppb              |
| 56Fe (KED)  | 0.000 ppb             | 0.0 %             | 0.000 ppb              |
| 58Ni (KED)  | 0.000 ppb             | 0.1 %             | 0.000 ppb              |
| 59Co (KED)  | 0.000 ppb             | 0.2 %             | 0.000 ppb              |
| 63Cu (KED)  | 0.000 ppb             | 0.2 %             | 0.000 ppb              |
| 64Zn (KED)  | 0.000 ppb             | 0.1 %             | 0.000 ppb              |
| 69Ga (KED)  | 0.000 ppb             | 0.2 %             | 0.000 ppb              |
| 75As (KED)  | 0.000 ppb             | 0.2 %             | 0.000 ppb              |
| 80Se (KED)  | 0.000 ppb             | 0.0 %             | 0.000 ppb              |
| 85Rb (KED)  | 0.000 ppb             | 0.9 %             | 0.000 ppb              |
| 88Sr (KED)  | 0.000 ppb             | 0.1 %             | 0.000 ppb              |
| 89Y (KED)   | 121.428 %             |                   |                        |
| 107Ag (KED) | 0.000 ppb             | 0.2 %             | 0.000 ppb              |
| 114Cd (KED) | 0.000 ppb             | 0.1 %             | 0.000 ppb              |
| 115In (KED) | 121.334 %             |                   |                        |
| 133Cs (KED) | 0.000 ppb             | 0.1 %             | 0.000 ppb              |
| 138Ba (KED) | 0.000 ppb             | 0.0 %             | 0.000 ppb              |
| 139La (KED) | 0.000 ppb             | 0.8 %             | 0.000 ppb              |
| 140Ce (KED) | 0.000 ppb             | 0.1 %             | 0.000 ppb              |
| 141Pr (KED) | 0.000 ppb             | 0.4 %             | 0.000 ppb              |
| 142Nd (KED) | 0.000 ppb             | 0.3 %             | 0.000 ppb              |
| 152Sm (KED) | 0.000 ppb             | 0.0 %             | 0.000 ppb              |
| 153Eu (KED) | 0.000 ppb             | 0.5 %             | 0.000 ppb              |
| 158Gd (KED) | 0.000 ppb             | 0.6 %             | 0.000 ppb              |
| 159Tb (KED) | 119.246 %             |                   |                        |
| 164Dy (KED) | 0.000 ppb             | 0.5 %             | 0.000 ppb              |
| 166Er (KED) | 0.000 ppb             | 0.0 %             | 0.000 ppb              |
| 169Tm (KED) | 0.000 ppb             | 0.7 %             | 0.000 ppb              |
| 174Yb (KED) | 0.000 ppb             | 0.1 %             | 0.000 ppb              |
| 175Lu (KED) | 0.000 ppb             | 0.0 %             | 0.000 ppb              |
| 205Tl (KED) | 0.000 ppb             | 0.3 %             | 0.000 ppb              |
| 208Pb (KED) | 0.000 ppb             | 0.0 %             | 0.000 ppb              |
| 209Bi (KED) | 119.655 %             |                   |                        |
| 232Th (KED) | 0.000 ppb             | 0.3 %             | 0.000 ppb              |
| 238U (KED)  | 0.000 ppb             | 0.4 %             | 0.000 ppb              |

**Standards:**

Analysis Index: 4  
 Analysis Name: 20+20  
 Analysis Type: STD  
 Analysis Started at: 10/20/2021 3:47:45 PM  
 Standard (Stock): std3  
 Standard DF: 1

| Category    | Concentration average | Concentration RSD | Standard Concentration |
|-------------|-----------------------|-------------------|------------------------|
| 6Li (KED)   | 119.757 %             |                   |                        |
| 9Be (KED)   | 19.800 ppb            | 0.9 %             | 20.000 ppb             |
| 11B (KED)   | 20.508 ppb            | 4.4 %             | 20.000 ppb             |
| 24Mg (KED)  | 19.783 ppb            | 2.3 %             | 20.000 ppb             |
| 27Al (KED)  | 21.374 ppb            | 3.4 %             | 20.000 ppb             |
| 45Sc (KED)  | 127.806 %             |                   |                        |
| 51V (KED)   | 20.119 ppb            | 2.4 %             | 20.000 ppb             |
| 52Cr (KED)  | 20.631 ppb            | 2.1 %             | 20.000 ppb             |
| 55Mn (KED)  | 20.036 ppb            | 1.5 %             | 20.000 ppb             |
| 56Fe (KED)  | 20.355 ppb            | 2.0 %             | 20.000 ppb             |
| 58Ni (KED)  | 20.727 ppb            | 2.0 %             | 20.000 ppb             |
| 59Co (KED)  | 20.551 ppb            | 2.1 %             | 20.000 ppb             |
| 63Cu (KED)  | 20.817 ppb            | 0.5 %             | 20.000 ppb             |
| 64Zn (KED)  | 20.548 ppb            | 1.2 %             | 20.000 ppb             |
| 69Ga (KED)  | 19.979 ppb            | 0.4 %             | 20.000 ppb             |
| 75As (KED)  | 20.246 ppb            | 1.3 %             | 20.000 ppb             |
| 80Se (KED)  | 20.744 ppb            | 1.1 %             | 20.000 ppb             |
| 85Rb (KED)  | 20.268 ppb            | 1.2 %             | 20.000 ppb             |
| 88Sr (KED)  | 20.132 ppb            | 1.9 %             | 20.000 ppb             |
| 89Y (KED)   | 126.498 %             |                   |                        |
| 107Ag (KED) | 20.583 ppb            | 1.1 %             | 20.000 ppb             |
| 114Cd (KED) | 20.205 ppb            | 0.7 %             | 20.000 ppb             |
| 115In (KED) | 124.268 %             |                   |                        |
| 133Cs (KED) | 20.128 ppb            | 0.3 %             | 20.000 ppb             |
| 138Ba (KED) | 20.173 ppb            | 1.7 %             | 20.000 ppb             |
| 139La (KED) | 19.116 ppb            | 1.0 %             | 20.000 ppb             |
| 140Ce (KED) | 19.029 ppb            | 1.7 %             | 20.000 ppb             |
| 141Pr (KED) | 19.180 ppb            | 0.8 %             | 20.000 ppb             |
| 142Nd (KED) | 19.494 ppb            | 1.5 %             | 20.000 ppb             |
| 152Sm (KED) | 19.690 ppb            | 1.7 %             | 20.000 ppb             |
| 153Eu (KED) | 19.337 ppb            | 0.6 %             | 20.000 ppb             |
| 158Gd (KED) | 19.648 ppb            | 0.6 %             | 20.000 ppb             |
| 159Tb (KED) | 124.376 %             |                   |                        |
| 164Dy (KED) | 19.381 ppb            | 1.7 %             | 20.000 ppb             |
| 166Er (KED) | 19.422 ppb            | 0.5 %             | 20.000 ppb             |
| 169Tm (KED) | 19.809 ppb            | 1.7 %             | 20.000 ppb             |
| 174Yb (KED) | 19.231 ppb            | 1.9 %             | 20.000 ppb             |
| 175Lu (KED) | 18.915 ppb            | 0.6 %             | 20.000 ppb             |
| 205Tl (KED) | 19.128 ppb            | 1.1 %             | 20.000 ppb             |
| 208Pb (KED) | 19.293 ppb            | 2.2 %             | 20.000 ppb             |
| 209Bi (KED) | 121.252 %             |                   |                        |
| 232Th (KED) | 19.399 ppb            | 2.9 %             | 20.000 ppb             |
| 238U (KED)  | 19.636 ppb            | 1.7 %             | 20.000 ppb             |

# Comprehensive

10/20/2021 6:11:31 PM

## Standards:

Analysis Index: 5  
Analysis Name: 50+20  
Analysis Type: STD  
Analysis Started at: 10/20/2021 3:51:51 PM  
Standard (Stock): std1  
Standard DF: 1

| Category    | Concentration average | Concentration RSD | Standard Concentration |
|-------------|-----------------------|-------------------|------------------------|
| 6Li (KED)   | 118.415 %             |                   |                        |
| 9Be (KED)   | 48.957 ppb            | 4.5 %             | 50.000 ppb             |
| 11B (KED)   | 47.970 ppb            | 4.2 %             | 50.000 ppb             |
| 24Mg (KED)  | 49.398 ppb            | 4.7 %             | 50.000 ppb             |
| 27Al (KED)  | 51.347 ppb            | 2.1 %             | 50.000 ppb             |
| 45Sc (KED)  | 130.545 %             |                   |                        |
| 51V (KED)   | 49.858 ppb            | 1.7 %             | 50.000 ppb             |
| 52Cr (KED)  | 50.126 ppb            | 1.1 %             | 50.000 ppb             |
| 55Mn (KED)  | 49.651 ppb            | 1.7 %             | 50.000 ppb             |
| 56Fe (KED)  | 50.198 ppb            | 1.3 %             | 50.000 ppb             |
| 58Ni (KED)  | 50.846 ppb            | 2.4 %             | 50.000 ppb             |
| 59Co (KED)  | 50.604 ppb            | 2.2 %             | 50.000 ppb             |
| 63Cu (KED)  | 50.130 ppb            | 1.3 %             | 50.000 ppb             |
| 64Zn (KED)  | 52.545 ppb            | 1.0 %             | 50.000 ppb             |
| 69Ga (KED)  | 49.691 ppb            | 0.7 %             | 50.000 ppb             |
| 75As (KED)  | 49.532 ppb            | 0.9 %             | 50.000 ppb             |
| 80Se (KED)  | 49.684 ppb            | 2.3 %             | 50.000 ppb             |
| 85Rb (KED)  | 48.993 ppb            | 0.6 %             | 50.000 ppb             |
| 88Sr (KED)  | 49.208 ppb            | 1.7 %             | 50.000 ppb             |
| 89Y (KED)   | 130.592 %             |                   |                        |
| 107Ag (KED) | 49.730 ppb            | 1.1 %             | 50.000 ppb             |
| 114Cd (KED) | 49.666 ppb            | 1.1 %             | 50.000 ppb             |
| 115In (KED) | 128.175 %             |                   |                        |
| 133Cs (KED) | 49.701 ppb            | 0.8 %             | 50.000 ppb             |
| 138Ba (KED) | 49.858 ppb            | 2.2 %             | 50.000 ppb             |
| 139La (KED) | 48.878 ppb            | 1.3 %             | 50.000 ppb             |
| 140Ce (KED) | 49.701 ppb            | 1.3 %             | 50.000 ppb             |
| 141Pr (KED) | 49.110 ppb            | 1.2 %             | 50.000 ppb             |
| 142Nd (KED) | 48.022 ppb            | 2.2 %             | 50.000 ppb             |
| 152Sm (KED) | 47.484 ppb            | 0.9 %             | 50.000 ppb             |
| 153Eu (KED) | 49.120 ppb            | 0.7 %             | 50.000 ppb             |
| 158Gd (KED) | 47.597 ppb            | 1.9 %             | 50.000 ppb             |
| 159Tb (KED) | 127.417 %             |                   |                        |
| 164Dy (KED) | 47.156 ppb            | 0.6 %             | 50.000 ppb             |
| 166Er (KED) | 48.025 ppb            | 1.7 %             | 50.000 ppb             |
| 169Tm (KED) | 49.851 ppb            | 1.8 %             | 50.000 ppb             |
| 174Yb (KED) | 49.370 ppb            | 2.9 %             | 50.000 ppb             |
| 175Lu (KED) | 49.351 ppb            | 2.9 %             | 50.000 ppb             |
| 205Tl (KED) | 49.567 ppb            | 0.8 %             | 50.000 ppb             |
| 208Pb (KED) | 49.882 ppb            | 1.7 %             | 50.000 ppb             |
| 209Bi (KED) | 122.750 %             |                   |                        |
| 232Th (KED) | 48.751 ppb            | 0.9 %             | 50.000 ppb             |
| 238U (KED)  | 48.576 ppb            | 0.9 %             | 50.000 ppb             |

**Standards:**

Analysis Index: 6  
 Analysis Name: 100+20  
 Analysis Type: STD  
 Analysis Started at: 10/20/2021 3:56:00 PM  
 Standard (Stock): std2  
 Standard DF: 1

| Category    | Concentration average | Concentration RSD | Standard Concentration |
|-------------|-----------------------|-------------------|------------------------|
| 6Li (KED)   | 118.121 %             |                   |                        |
| 9Be (KED)   | 100.562 ppb           | 2.7 %             | 100.000 ppb            |
| 11B (KED)   | 100.913 ppb           | 1.5 %             | 100.000 ppb            |
| 24Mg (KED)  | 100.344 ppb           | 3.0 %             | 100.000 ppb            |
| 27Al (KED)  | 99.052 ppb            | 2.6 %             | 100.000 ppb            |
| 45Sc (KED)  | 131.508 %             |                   |                        |
| 51V (KED)   | 100.047 ppb           | 2.1 %             | 100.000 ppb            |
| 52Cr (KED)  | 99.811 ppb            | 1.3 %             | 100.000 ppb            |
| 55Mn (KED)  | 100.167 ppb           | 2.3 %             | 100.000 ppb            |
| 56Fe (KED)  | 99.830 ppb            | 1.5 %             | 100.000 ppb            |
| 58Ni (KED)  | 99.432 ppb            | 0.9 %             | 100.000 ppb            |
| 59Co (KED)  | 99.588 ppb            | 1.2 %             | 100.000 ppb            |
| 63Cu (KED)  | 99.772 ppb            | 0.2 %             | 100.000 ppb            |
| 64Zn (KED)  | 98.618 ppb            | 1.1 %             | 100.000 ppb            |
| 69Ga (KED)  | 100.159 ppb           | 0.2 %             | 100.000 ppb            |
| 75As (KED)  | 100.185 ppb           | 1.0 %             | 100.000 ppb            |
| 80Se (KED)  | 100.009 ppb           | 1.4 %             | 100.000 ppb            |
| 85Rb (KED)  | 100.450 ppb           | 1.2 %             | 100.000 ppb            |
| 88Sr (KED)  | 100.370 ppb           | 0.7 %             | 100.000 ppb            |
| 89Y (KED)   | 130.145 %             |                   |                        |
| 107Ag (KED) | 100.018 ppb           | 0.6 %             | 100.000 ppb            |
| 114Cd (KED) | 100.126 ppb           | 0.2 %             | 100.000 ppb            |
| 115In (KED) | 127.259 %             |                   |                        |
| 133Cs (KED) | 100.124 ppb           | 1.8 %             | 100.000 ppb            |
| 138Ba (KED) | 100.037 ppb           | 0.8 %             | 100.000 ppb            |
| 139La (KED) | 100.738 ppb           | 2.1 %             | 100.000 ppb            |
| 140Ce (KED) | 100.344 ppb           | 0.9 %             | 100.000 ppb            |
| 141Pr (KED) | 100.609 ppb           | 1.7 %             | 100.000 ppb            |
| 142Nd (KED) | 101.090 ppb           | 1.8 %             | 100.000 ppb            |
| 152Sm (KED) | 101.320 ppb           | 1.8 %             | 100.000 ppb            |
| 153Eu (KED) | 100.573 ppb           | 2.6 %             | 100.000 ppb            |
| 158Gd (KED) | 101.272 ppb           | 1.4 %             | 100.000 ppb            |
| 159Tb (KED) | 127.381 %             |                   |                        |
| 164Dy (KED) | 101.546 ppb           | 0.7 %             | 100.000 ppb            |
| 166Er (KED) | 101.103 ppb           | 1.8 %             | 100.000 ppb            |
| 169Tm (KED) | 100.113 ppb           | 0.9 %             | 100.000 ppb            |
| 174Yb (KED) | 100.469 ppb           | 0.7 %             | 100.000 ppb            |
| 175Lu (KED) | 100.542 ppb           | 2.1 %             | 100.000 ppb            |
| 205Tl (KED) | 100.391 ppb           | 1.2 %             | 100.000 ppb            |
| 208Pb (KED) | 100.200 ppb           | 1.8 %             | 100.000 ppb            |
| 209Bi (KED) | 122.391 %             |                   |                        |
| 232Th (KED) | 100.745 ppb           | 1.8 %             | 100.000 ppb            |
| 238U (KED)  | 100.785 ppb           | 0.9 %             | 100.000 ppb            |

# Comprehensive

10/20/2021 6:11:31 PM

## Sample List Summary:

Instrument ID: iCAP Q

| Index: | Label:    | Main<br>Runs: | Survey<br>Runs: | Start Time:           | User name:                    |
|--------|-----------|---------------|-----------------|-----------------------|-------------------------------|
| 1      | water     | 3             | 0               | 10/20/2021 3:37:34 PM | WINDOWS-UPCI4ER\Administrator |
| 2      | blk       | 3             | 0               | 10/20/2021 3:40:36 PM | WINDOWS-UPCI4ER\Administrator |
| 3      | 0+20      | 3             | 0               | 10/20/2021 3:44:15 PM | WINDOWS-UPCI4ER\Administrator |
| 4      | 20+20     | 3             | 0               | 10/20/2021 3:47:45 PM | WINDOWS-UPCI4ER\Administrator |
| 5      | 50+20     | 3             | 0               | 10/20/2021 3:51:51 PM | WINDOWS-UPCI4ER\Administrator |
| 6      | 100+20    | 3             | 0               | 10/20/2021 3:56:00 PM | WINDOWS-UPCI4ER\Administrator |
| 7      | 191083ti  | 3             | 0               | 10/20/2021 4:00:23 PM | WINDOWS-UPCI4ER\Administrator |
| 8      | 191077ti  | 3             | 0               | 10/20/2021 4:04:51 PM | WINDOWS-UPCI4ER\Administrator |
| 9      | 191063ti  | 3             | 0               | 10/20/2021 4:09:09 PM | WINDOWS-UPCI4ER\Administrator |
| 10     | w122ti    | 3             | 0               | 10/20/2021 4:13:24 PM | WINDOWS-UPCI4ER\Administrator |
| 11     | 191082ti  | 3             | 0               | 10/20/2021 4:17:29 PM | WINDOWS-UPCI4ER\Administrator |
| 12     | w100ti    | 3             | 0               | 10/20/2021 4:21:57 PM | WINDOWS-UPCI4ER\Administrator |
| 13     | 29690ti   | 3             | 0               | 10/20/2021 4:26:09 PM | WINDOWS-UPCI4ER\Administrator |
| 14     | 1805068ti | 3             | 0               | 10/20/2021 4:30:13 PM | WINDOWS-UPCI4ER\Administrator |
| 15     | 191128ti  | 3             | 0               | 10/20/2021 4:34:23 PM | WINDOWS-UPCI4ER\Administrator |
| 16     | 19196ti   | 3             | 0               | 10/20/2021 4:38:29 PM | WINDOWS-UPCI4ER\Administrator |
| 17     | 191117ti  | 3             | 0               | 10/20/2021 4:42:45 PM | WINDOWS-UPCI4ER\Administrator |
| 18     | 1855y ti  | 3             | 0               | 10/20/2021 4:46:51 PM | WINDOWS-UPCI4ER\Administrator |
| 19     | 29682ti   | 3             | 0               | 10/20/2021 4:50:55 PM | WINDOWS-UPCI4ER\Administrator |
| 20     | 03050jian | 3             | 0               | 10/20/2021 4:54:50 PM | WINDOWS-UPCI4ER\Administrator |
| 21     | 03470jian | 3             | 0               | 10/20/2021 4:59:17 PM | WINDOWS-UPCI4ER\Administrator |
| 22     | 03266jian | 3             | 0               | 10/20/2021 5:03:14 PM | WINDOWS-UPCI4ER\Administrator |
| 23     | 3343jian  | 3             | 0               | 10/20/2021 5:06:34 PM | WINDOWS-UPCI4ER\Administrator |
| 24     | 03260jian | 3             | 0               | 10/20/2021 5:09:53 PM | WINDOWS-UPCI4ER\Administrator |
| 25     | 03271jian | 3             | 0               | 10/20/2021 5:13:12 PM | WINDOWS-UPCI4ER\Administrator |
| 26     | 03272jian | 3             | 0               | 10/20/2021 5:16:31 PM | WINDOWS-UPCI4ER\Administrator |
| 27     | w29jian   | 3             | 0               | 10/20/2021 5:19:47 PM | WINDOWS-UPCI4ER\Administrator |
| 28     | 03273jian | 3             | 0               | 10/20/2021 5:23:00 PM | WINDOWS-UPCI4ER\Administrator |
| 29     | 00025jian | 3             | 0               | 10/20/2021 5:26:16 PM | WINDOWS-UPCI4ER\Administrator |
| 30     | 03049jian | 3             | 0               | 10/20/2021 5:29:26 PM | WINDOWS-UPCI4ER\Administrator |
| 31     | 30013jian | 1             | 0               | 10/20/2021 5:32:41 PM | WINDOWS-UPCI4ER\Administrator |
| 32     | 0078jian  | 1             | 0               | 10/20/2021 5:34:33 PM | WINDOWS-UPCI4ER\Administrator |
| 33     | 03045jian | 1             | 0               | 10/20/2021 5:36:32 PM | WINDOWS-UPCI4ER\Administrator |
| 34     | 03263ti   | 1             | 0               | 10/20/2021 5:38:25 PM | WINDOWS-UPCI4ER\Administrator |
| 35     | 03255ti   | 1             | 0               | 10/20/2021 5:40:28 PM | WINDOWS-UPCI4ER\Administrator |
| 36     | 03028ti   | 1             | 0               | 10/20/2021 5:42:24 PM | WINDOWS-UPCI4ER\Administrator |
| 37     | 03252ti   | 1             | 0               | 10/20/2021 5:44:27 PM | WINDOWS-UPCI4ER\Administrator |
| 38     | 03035ti   | 1             | 0               | 10/20/2021 5:46:21 PM | WINDOWS-UPCI4ER\Administrator |
| 39     | 03262ti   | 1             | 0               | 10/20/2021 5:48:15 PM | WINDOWS-UPCI4ER\Administrator |
| 40     | 03253ti   | 1             | 0               | 10/20/2021 5:50:14 PM | WINDOWS-UPCI4ER\Administrator |
| 41     | 03032ti   | 1             | 0               | 10/20/2021 5:52:11 PM | WINDOWS-UPCI4ER\Administrator |
| 42     | 03025ti   | 1             | 0               | 10/20/2021 5:54:12 PM | WINDOWS-UPCI4ER\Administrator |
| 43     | 03251ti   | 1             | 0               | 10/20/2021 5:56:05 PM | WINDOWS-UPCI4ER\Administrator |
| 44     | 03261ti   | 1             | 0               | 10/20/2021 5:58:02 PM | WINDOWS-UPCI4ER\Administrator |
| 45     | 03010ti   | 1             | 0               | 10/20/2021 5:59:57 PM | WINDOWS-UPCI4ER\Administrator |
| 46     | 03264ti   | 1             | 0               | 10/20/2021 6:01:49 PM | WINDOWS-UPCI4ER\Administrator |
| 47     | 03254ti   | 1             | 0               | 10/20/2021 6:03:38 PM | WINDOWS-UPCI4ER\Administrator |
| 48     | 03258ti   | 1             | 0               | 10/20/2021 6:05:30 PM | WINDOWS-UPCI4ER\Administrator |
| 49     | 03038ti   | 1             | 0               | 10/20/2021 6:07:33 PM | WINDOWS-UPCI4ER\Administrator |
| 50     | 03037ti   | 1             | 0               | 10/20/2021 6:09:22 PM | WINDOWS-UPCI4ER\Administrator |

## Sample Summary

Instrument ID: iCAP Q

Analysis index: 1

Analysis name: water

Analysis started at: 10/20/2021 3:37:34 PM

User name: WINDOWS-UPCI4ER\Administrator

| Category    | Concentration average | Concentration RSD |
|-------------|-----------------------|-------------------|
| 6Li (KED)   | 0.042 %               | 173.2 %           |
| 11B (KED)   | Infinity ppb          |                   |
| 24Mg (KED)  | Infinity ppb          |                   |
| 27Al (KED)  | 19.746 ppb            | 92.7 %            |
| 45Sc (KED)  | 0.186 %               | 16.4 %            |
| 51V (KED)   | 0.334 ppb             | 26.6 %            |
| 52Cr (KED)  | 0.690 ppb             | 52.8 %            |
| 55Mn (KED)  | 0.506 ppb             | 98.9 %            |
| 56Fe (KED)  | 9.974 ppb             | 14.5 %            |
| 58Ni (KED)  | 6.481 ppb             | 37.2 %            |
| 59Co (KED)  | 0.027 ppb             | 180.0 %           |
| 63Cu (KED)  | Infinity ppb          |                   |
| 64Zn (KED)  | Infinity ppb          |                   |
| 80Se (KED)  | Infinity ppb          |                   |
| 89Y (KED)   | 0.000 %               |                   |
| 114Cd (KED) | Infinity ppb          |                   |
| 115In (KED) | 0.000 %               |                   |
| 138Ba (KED) | Infinity ppb          |                   |
| 159Tb (KED) | 0.000 %               | 173.2 %           |
| 205Tl (KED) | 4.807 ppb             | 70.8 %            |
| 208Pb (KED) | 18.750 ppb            | 72.7 %            |
| 209Bi (KED) | 0.002 %               | 82.0 %            |
| 232Th (KED) | 0.000 ppb             | 0.0 %             |
| 238U (KED)  | 2.516 ppb             | 134.7 %           |

| Category    | Concentration average | Intensity average | Intensity RSD |
|-------------|-----------------------|-------------------|---------------|
| 6Li (KED)   | 0.042 %               | 1 cps             | 173.2 %       |
| 9Be (KED)   |                       | 0 cps             |               |
| 11B (KED)   | Infinity ppb          | 12 cps            | 83.3 %        |
| 24Mg (KED)  | Infinity ppb          | 4 cps             | 43.3 %        |
| 27Al (KED)  | 19.746 ppb            | 4 cps             | 86.6 %        |
| 45Sc (KED)  | 0.186 %               | 73 cps            | 16.4 %        |
| 51V (KED)   | 0.334 ppb             | 4 cps             | 43.3 %        |
| 52Cr (KED)  | 0.690 ppb             | 13 cps            | 43.3 %        |
| 55Mn (KED)  | 0.506 ppb             | 6 cps             | 91.7 %        |
| 56Fe (KED)  | 9.974 ppb             | 189 cps           | 8.0 %         |
| 58Ni (KED)  | 6.481 ppb             | 157 cps           | 28.8 %        |
| 59Co (KED)  | 0.027 ppb             | 1 cps             | 173.2 %       |
| 63Cu (KED)  | Infinity ppb          | 36 cps            | 28.6 %        |
| 64Zn (KED)  | Infinity ppb          | 246 cps           | 11.1 %        |
| 69Ga (KED)  |                       | 1 cps             | 173.2 %       |
| 75As (KED)  |                       | 10 cps            | 88.2 %        |
| 80Se (KED)  | Infinity ppb          | 957 cps           | 5.7 %         |
| 85Rb (KED)  |                       | 2 cps             | 86.6 %        |
| 88Sr (KED)  |                       | 2 cps             | 173.2 %       |
| 89Y (KED)   | 0.000 %               | 0 cps             |               |
| 107Ag (KED) |                       | 2 cps             | 173.2 %       |
| 114Cd (KED) | Infinity ppb          | 3 cps             | 0.0 %         |
| 115In (KED) | 0.000 %               | 0 cps             |               |
| 133Cs (KED) |                       | 1 cps             | 173.2 %       |

# Comprehensive

10/20/2021 6:11:31 PM

---

| Category    | Concentration average | Intensity average | Intensity RSD |
|-------------|-----------------------|-------------------|---------------|
| 138Ba (KED) | Infinity ppb          | 14 cps            | 93.3 %        |
| 139La (KED) |                       | 0 cps             |               |
| 140Ce (KED) |                       | 0 cps             |               |
| 141Pr (KED) |                       | 0 cps             |               |
| 142Nd (KED) |                       | 0 cps             |               |
| 152Sm (KED) |                       | 0 cps             |               |
| 153Eu (KED) |                       | 0 cps             |               |
| 158Gd (KED) |                       | 0 cps             |               |
| 159Tb (KED) | 0.000 %               | 1 cps             | 173.2 %       |
| 164Dy (KED) |                       | 0 cps             |               |
| 166Er (KED) |                       | 0 cps             |               |
| 169Tm (KED) |                       | 0 cps             |               |
| 174Yb (KED) |                       | 0 cps             |               |
| 175Lu (KED) |                       | 0 cps             |               |
| 205Tl (KED) | 4.807 ppb             | 10 cps            | 33.3 %        |
| 208Pb (KED) | 18.750 ppb            | 29 cps            | 33.3 %        |
| 209Bi (KED) | 0.002 %               | 63 cps            | 82.0 %        |
| 232Th (KED) | 0.000 ppb             | 0 cps             |               |
| 238U (KED)  | 2.516 ppb             | 23 cps            | 161.0 %       |

## Sample Summary

Instrument ID: iCAP Q

Analysis index: 2

Analysis name: blk

Analysis started at: 10/20/2021 3:40:36 PM

User name: WINDOWS-UPCI4ER\Administrator

| Category    | Concentration average | Concentration RSD |
|-------------|-----------------------|-------------------|
| 6Li (KED)   | 100.000 %             |                   |
| 9Be (KED)   | -0.007 ppb            | 0.0 %             |
| 11B (KED)   | 0.386 ppb             | 198.5 %           |
| 24Mg (KED)  | 0.125 ppb             | 85.5 %            |
| 27Al (KED)  | 0.294 ppb             | 129.8 %           |
| 45Sc (KED)  | 100.000 %             |                   |
| 51V (KED)   | 0.000 ppb             | 130.4 %           |
| 52Cr (KED)  | 0.001 ppb             | 154.2 %           |
| 55Mn (KED)  | 0.003 ppb             | 148.4 %           |
| 56Fe (KED)  | 0.055 ppb             | 83.2 %            |
| 58Ni (KED)  | 0.005 ppb             | 88.5 %            |
| 59Co (KED)  | 0.000 ppb             | 97.7 %            |
| 63Cu (KED)  | 0.050 ppb             | 137.6 %           |
| 64Zn (KED)  | 0.278 ppb             | 124.0 %           |
| 69Ga (KED)  | 0.011 ppb             | 167.7 %           |
| 75As (KED)  | -0.005 ppb            | 87.5 %            |
| 80Se (KED)  | 0.386 ppb             | 125.1 %           |
| 85Rb (KED)  | 0.000 ppb             | 601.3 %           |
| 88Sr (KED)  | 0.006 ppb             | 48.3 %            |
| 89Y (KED)   | 100.000 %             |                   |
| 107Ag (KED) | 0.000 ppb             | 105.9 %           |
| 114Cd (KED) | 0.000 ppb             | 707.4 %           |
| 115In (KED) | 100.000 %             |                   |
| 133Cs (KED) | 0.000 ppb             | 2,176.2 %         |
| 138Ba (KED) | 0.024 ppb             | 112.0 %           |
| 139La (KED) | 0.000 ppb             | 3,559.6 %         |
| 140Ce (KED) | 0.001 ppb             | 68.2 %            |
| 141Pr (KED) | 0.000 ppb             | 148.2 %           |
| 142Nd (KED) | 0.000 ppb             | 131.9 %           |
| 152Sm (KED) | 0.000 ppb             | 269.0 %           |
| 153Eu (KED) | 0.000 ppb             | 1,800.3 %         |
| 158Gd (KED) | 0.000 ppb             | 367.8 %           |
| 159Tb (KED) | 100.000 %             |                   |
| 164Dy (KED) | 0.000 ppb             | 147.9 %           |
| 166Er (KED) | 0.001 ppb             | 80.6 %            |
| 169Tm (KED) | 0.000 ppb             | 106.6 %           |
| 174Yb (KED) | 0.000 ppb             | 123.7 %           |
| 175Lu (KED) | 0.033 ppb             | 30.6 %            |
| 205Tl (KED) | 0.000 ppb             | 172.8 %           |
| 208Pb (KED) | 0.011 ppb             | 112.4 %           |
| 209Bi (KED) | 100.000 %             |                   |
| 232Th (KED) | 0.000 ppb             | 3,517.6 %         |
| 238U (KED)  | 0.000 ppb             | 37.2 %            |

| Category   | Concentration average | Intensity average | Intensity RSD |
|------------|-----------------------|-------------------|---------------|
| 6Li (KED)  | 100.000 %             | 2,649 cps         | 21.3 %        |
| 9Be (KED)  | -0.007 ppb            | 0 cps             |               |
| 11B (KED)  | 0.386 ppb             | 316 cps           | 8.6 %         |
| 24Mg (KED) | 0.125 ppb             | 141 cps           | 33.1 %        |
| 27Al (KED) | 0.294 ppb             | 106 cps           | 19.0 %        |

# Comprehensive

10/20/2021 6:11:31 PM

| Category    | Concentration average | Intensity average | Intensity RSD |
|-------------|-----------------------|-------------------|---------------|
| 45Sc (KED)  | 100.000 %             | 39,512 cps        | 20.6 %        |
| 51V (KED)   | 0.000 ppb             | 6 cps             | 34.6 %        |
| 52Cr (KED)  | 0.001 ppb             | 64 cps            | 25.5 %        |
| 55Mn (KED)  | 0.003 ppb             | 50 cps            | 30.6 %        |
| 56Fe (KED)  | 0.055 ppb             | 2,150 cps         | 3.6 %         |
| 58Ni (KED)  | 0.005 ppb             | 346 cps           | 12.1 %        |
| 59Co (KED)  | 0.000 ppb             | 16 cps            | 68.9 %        |
| 63Cu (KED)  | 0.050 ppb             | 1,400 cps         | 61.2 %        |
| 64Zn (KED)  | 0.278 ppb             | 2,098 cps         | 62.6 %        |
| 69Ga (KED)  | 0.011 ppb             | 121 cps           | 63.6 %        |
| 75As (KED)  | -0.005 ppb            | 10 cps            | 57.7 %        |
| 80Se (KED)  | 0.386 ppb             | 1,100 cps         | 5.7 %         |
| 85Rb (KED)  | 0.000 ppb             | 11 cps            | 91.7 %        |
| 88Sr (KED)  | 0.006 ppb             | 211 cps           | 10.5 %        |
| 89Y (KED)   | 100.000 %             | 367,354 cps       | 19.2 %        |
| 107Ag (KED) | 0.000 ppb             | 19 cps            | 44.4 %        |
| 114Cd (KED) | 0.000 ppb             | 47 cps            | 32.7 %        |
| 115In (KED) | 100.000 %             | 695,617 cps       | 16.6 %        |
| 133Cs (KED) | 0.000 ppb             | 17 cps            | 80.0 %        |
| 138Ba (KED) | 0.024 ppb             | 2,164 cps         | 33.0 %        |
| 139La (KED) | 0.000 ppb             | 26 cps            | 49.4 %        |
| 140Ce (KED) | 0.001 ppb             | 162 cps           | 17.5 %        |
| 141Pr (KED) | 0.000 ppb             | 11 cps            | 96.4 %        |
| 142Nd (KED) | 0.000 ppb             | 21 cps            | 32.9 %        |
| 152Sm (KED) | 0.000 ppb             | 4 cps             | 114.6 %       |
| 153Eu (KED) | 0.000 ppb             | 6 cps             | 69.3 %        |
| 158Gd (KED) | 0.000 ppb             | 10 cps            | 88.2 %        |
| 159Tb (KED) | 100.000 %             | 3,563,809 cps     | 15.1 %        |
| 164Dy (KED) | 0.000 ppb             | 14 cps            | 35.3 %        |
| 166Er (KED) | 0.001 ppb             | 508 cps           | 5.3 %         |
| 169Tm (KED) | 0.000 ppb             | 9 cps             | 43.3 %        |
| 174Yb (KED) | 0.000 ppb             | 18 cps            | 21.7 %        |
| 175Lu (KED) | 0.033 ppb             | 33,608 cps        | 13.8 %        |
| 205Tl (KED) | 0.000 ppb             | 18 cps            | 47.2 %        |
| 208Pb (KED) | 0.011 ppb             | 6,070 cps         | 20.4 %        |
| 209Bi (KED) | 100.000 %             | 3,187,736 cps     | 15.6 %        |
| 232Th (KED) | 0.000 ppb             | 71 cps            | 63.6 %        |
| 238U (KED)  | 0.000 ppb             | 132 cps           | 8.9 %         |

## Sample Summary

Instrument ID: iCAP Q

Analysis index: 3

Analysis name: 0+20

Analysis started at: 10/20/2021 3:44:15 PM

User name: WINDOWS-UPCI4ER\Administrator

| Category    | Concentration average | Concentration RSD |
|-------------|-----------------------|-------------------|
| 6Li (KED)   | 117.827 %             |                   |
| 9Be (KED)   | 0.000 ppb             | 1.7 %             |
| 11B (KED)   | 0.000 ppb             | 0.2 %             |
| 24Mg (KED)  | 0.000 ppb             | 0.2 %             |
| 27Al (KED)  | 0.000 ppb             | 0.3 %             |
| 45Sc (KED)  | 122.504 %             |                   |
| 51V (KED)   | 0.000 ppb             | 0.9 %             |
| 52Cr (KED)  | 0.000 ppb             | 0.2 %             |
| 55Mn (KED)  | 0.000 ppb             | 0.4 %             |
| 56Fe (KED)  | 0.000 ppb             | 0.0 %             |
| 58Ni (KED)  | 0.000 ppb             | 0.1 %             |
| 59Co (KED)  | 0.000 ppb             | 0.2 %             |
| 63Cu (KED)  | 0.000 ppb             | 0.2 %             |
| 64Zn (KED)  | 0.000 ppb             | 0.1 %             |
| 69Ga (KED)  | 0.000 ppb             | 0.2 %             |
| 75As (KED)  | 0.000 ppb             | 0.2 %             |
| 80Se (KED)  | 0.000 ppb             | 0.0 %             |
| 85Rb (KED)  | 0.000 ppb             | 0.9 %             |
| 88Sr (KED)  | 0.000 ppb             | 0.1 %             |
| 89Y (KED)   | 121.428 %             |                   |
| 107Ag (KED) | 0.000 ppb             | 0.2 %             |
| 114Cd (KED) | 0.000 ppb             | 0.1 %             |
| 115In (KED) | 121.334 %             |                   |
| 133Cs (KED) | 0.000 ppb             | 0.1 %             |
| 138Ba (KED) | 0.000 ppb             | 0.0 %             |
| 139La (KED) | 0.000 ppb             | 0.8 %             |
| 140Ce (KED) | 0.000 ppb             | 0.1 %             |
| 141Pr (KED) | 0.000 ppb             | 0.4 %             |
| 142Nd (KED) | 0.000 ppb             | 0.3 %             |
| 152Sm (KED) | 0.000 ppb             | 0.0 %             |
| 153Eu (KED) | 0.000 ppb             | 0.5 %             |
| 158Gd (KED) | 0.000 ppb             | 0.6 %             |
| 159Tb (KED) | 119.246 %             |                   |
| 164Dy (KED) | 0.000 ppb             | 0.5 %             |
| 166Er (KED) | 0.000 ppb             | 0.0 %             |
| 169Tm (KED) | 0.000 ppb             | 0.7 %             |
| 174Yb (KED) | 0.000 ppb             | 0.1 %             |
| 175Lu (KED) | 0.000 ppb             | 0.0 %             |
| 205Tl (KED) | 0.000 ppb             | 0.3 %             |
| 208Pb (KED) | 0.000 ppb             | 0.0 %             |
| 209Bi (KED) | 119.655 %             |                   |
| 232Th (KED) | 0.000 ppb             | 0.3 %             |
| 238U (KED)  | 0.000 ppb             | 0.4 %             |

| Category   | Concentration average | Intensity average | Intensity RSD |
|------------|-----------------------|-------------------|---------------|
| 6Li (KED)  | 117.827 %             | 3,122 cps         | 4.1 %         |
| 9Be (KED)  | 0.000 ppb             | 1 cps             | 173.2 %       |
| 11B (KED)  | 0.000 ppb             | 343 cps           | 13.1 %        |
| 24Mg (KED) | 0.000 ppb             | 100 cps           | 23.3 %        |
| 27Al (KED) | 0.000 ppb             | 94 cps            | 30.8 %        |

# Comprehensive

10/20/2021 6:11:31 PM

| Category    | Concentration average | Intensity average | Intensity RSD |
|-------------|-----------------------|-------------------|---------------|
| 45Sc (KED)  | 122.504 %             | 48,404 cps        | 0.5 %         |
| 51V (KED)   | 0.000 ppb             | 6 cps             | 91.7 %        |
| 52Cr (KED)  | 0.000 ppb             | 66 cps            | 20.5 %        |
| 55Mn (KED)  | 0.000 ppb             | 47 cps            | 42.9 %        |
| 56Fe (KED)  | 0.000 ppb             | 2,020 cps         | 1.3 %         |
| 58Ni (KED)  | 0.000 ppb             | 356 cps           | 10.5 %        |
| 59Co (KED)  | 0.000 ppb             | 29 cps            | 17.6 %        |
| 63Cu (KED)  | 0.000 ppb             | 802 cps           | 23.2 %        |
| 64Zn (KED)  | 0.000 ppb             | 1,007 cps         | 7.8 %         |
| 69Ga (KED)  | 0.000 ppb             | 84 cps            | 18.7 %        |
| 75As (KED)  | 0.000 ppb             | 21 cps            | 24.1 %        |
| 80Se (KED)  | 0.000 ppb             | 1,141 cps         | 4.4 %         |
| 85Rb (KED)  | 0.000 ppb             | 17 cps            | 87.2 %        |
| 88Sr (KED)  | 0.000 ppb             | 209 cps           | 9.4 %         |
| 89Y (KED)   | 121.428 %             | 446,069 cps       | 0.3 %         |
| 107Ag (KED) | 0.000 ppb             | 16 cps            | 24.7 %        |
| 114Cd (KED) | 0.000 ppb             | 56 cps            | 13.9 %        |
| 115In (KED) | 121.334 %             | 844,019 cps       | 0.2 %         |
| 133Cs (KED) | 0.000 ppb             | 19 cps            | 10.2 %        |
| 138Ba (KED) | 0.000 ppb             | 1,661 cps         | 3.4 %         |
| 139La (KED) | 0.000 ppb             | 32 cps            | 74.8 %        |
| 140Ce (KED) | 0.000 ppb             | 113 cps           | 5.9 %         |
| 141Pr (KED) | 0.000 ppb             | 4 cps             | 43.3 %        |
| 142Nd (KED) | 0.000 ppb             | 20 cps            | 28.9 %        |
| 152Sm (KED) | 0.000 ppb             | 3 cps             | 0.0 %         |
| 153Eu (KED) | 0.000 ppb             | 7 cps             | 50.0 %        |
| 158Gd (KED) | 0.000 ppb             | 9 cps             | 57.3 %        |
| 159Tb (KED) | 119.246 %             | 4,249,706 cps     | 1.1 %         |
| 164Dy (KED) | 0.000 ppb             | 23 cps            | 51.5 %        |
| 166Er (KED) | 0.000 ppb             | 524 cps           | 2.4 %         |
| 169Tm (KED) | 0.000 ppb             | 6 cps             | 69.3 %        |
| 174Yb (KED) | 0.000 ppb             | 28 cps            | 13.9 %        |
| 175Lu (KED) | 0.000 ppb             | 34,605 cps        | 3.2 %         |
| 205Tl (KED) | 0.000 ppb             | 17 cps            | 34.6 %        |
| 208Pb (KED) | 0.000 ppb             | 5,762 cps         | 1.9 %         |
| 209Bi (KED) | 119.655 %             | 3,814,275 cps     | 0.3 %         |
| 232Th (KED) | 0.000 ppb             | 82 cps            | 28.8 %        |
| 238U (KED)  | 0.000 ppb             | 92 cps            | 43.4 %        |

## Sample Summary

Instrument ID: iCAP Q

Analysis index: 4

Analysis name: 20+20

Analysis started at: 10/20/2021 3:47:45 PM

User name: WINDOWS-UPCI4ER\Administrator

| Category    | Concentration average | Concentration RSD |
|-------------|-----------------------|-------------------|
| 6Li (KED)   | 119.757 %             |                   |
| 9Be (KED)   | 19.800 ppb            | 0.9 %             |
| 11B (KED)   | 20.508 ppb            | 4.4 %             |
| 24Mg (KED)  | 19.783 ppb            | 2.3 %             |
| 27Al (KED)  | 21.374 ppb            | 3.4 %             |
| 45Sc (KED)  | 127.806 %             |                   |
| 51V (KED)   | 20.119 ppb            | 2.4 %             |
| 52Cr (KED)  | 20.631 ppb            | 2.1 %             |
| 55Mn (KED)  | 20.036 ppb            | 1.5 %             |
| 56Fe (KED)  | 20.355 ppb            | 2.0 %             |
| 58Ni (KED)  | 20.727 ppb            | 2.0 %             |
| 59Co (KED)  | 20.551 ppb            | 2.1 %             |
| 63Cu (KED)  | 20.817 ppb            | 0.5 %             |
| 64Zn (KED)  | 20.548 ppb            | 1.2 %             |
| 69Ga (KED)  | 19.979 ppb            | 0.4 %             |
| 75As (KED)  | 20.246 ppb            | 1.3 %             |
| 80Se (KED)  | 20.744 ppb            | 1.1 %             |
| 85Rb (KED)  | 20.268 ppb            | 1.2 %             |
| 88Sr (KED)  | 20.132 ppb            | 1.9 %             |
| 89Y (KED)   | 126.498 %             |                   |
| 107Ag (KED) | 20.583 ppb            | 1.1 %             |
| 114Cd (KED) | 20.205 ppb            | 0.7 %             |
| 115In (KED) | 124.268 %             |                   |
| 133Cs (KED) | 20.128 ppb            | 0.3 %             |
| 138Ba (KED) | 20.173 ppb            | 1.7 %             |
| 139La (KED) | 19.116 ppb            | 1.0 %             |
| 140Ce (KED) | 19.029 ppb            | 1.7 %             |
| 141Pr (KED) | 19.180 ppb            | 0.8 %             |
| 142Nd (KED) | 19.494 ppb            | 1.5 %             |
| 152Sm (KED) | 19.690 ppb            | 1.7 %             |
| 153Eu (KED) | 19.337 ppb            | 0.6 %             |
| 158Gd (KED) | 19.648 ppb            | 0.6 %             |
| 159Tb (KED) | 124.376 %             |                   |
| 164Dy (KED) | 19.381 ppb            | 1.7 %             |
| 166Er (KED) | 19.422 ppb            | 0.5 %             |
| 169Tm (KED) | 19.809 ppb            | 1.7 %             |
| 174Yb (KED) | 19.231 ppb            | 1.9 %             |
| 175Lu (KED) | 18.915 ppb            | 0.6 %             |
| 205Tl (KED) | 19.128 ppb            | 1.1 %             |
| 208Pb (KED) | 19.293 ppb            | 2.2 %             |
| 209Bi (KED) | 121.252 %             |                   |
| 232Th (KED) | 19.399 ppb            | 2.9 %             |
| 238U (KED)  | 19.636 ppb            | 1.7 %             |

| Category   | Concentration average | Intensity average | Intensity RSD |
|------------|-----------------------|-------------------|---------------|
| 6Li (KED)  | 119.757 %             | 3,173 cps         | 1.2 %         |
| 9Be (KED)  | 19.800 ppb            | 3,566 cps         | 2.2 %         |
| 11B (KED)  | 20.508 ppb            | 2,307 cps         | 3.5 %         |
| 24Mg (KED) | 19.783 ppb            | 11,677 cps        | 2.0 %         |
| 27Al (KED) | 21.374 ppb            | 3,310 cps         | 2.0 %         |

# Comprehensive

10/20/2021 6:11:31 PM

| Category    | Concentration average | Intensity average | Intensity RSD |
|-------------|-----------------------|-------------------|---------------|
| 45Sc (KED)  | 127.806 %             | 50,499 cps        | 1.6 %         |
| 51V (KED)   | 20.119 ppb            | 179,060 cps       | 0.8 %         |
| 52Cr (KED)  | 20.631 ppb            | 288,978 cps       | 0.6 %         |
| 55Mn (KED)  | 20.036 ppb            | 144,480 cps       | 0.4 %         |
| 56Fe (KED)  | 20.355 ppb            | 266,874 cps       | 0.8 %         |
| 58Ni (KED)  | 20.727 ppb            | 356,247 cps       | 0.5 %         |
| 59Co (KED)  | 20.551 ppb            | 578,367 cps       | 0.7 %         |
| 63Cu (KED)  | 20.817 ppb            | 449,721 cps       | 0.7 %         |
| 64Zn (KED)  | 20.548 ppb            | 136,524 cps       | 0.6 %         |
| 69Ga (KED)  | 19.979 ppb            | 142,234 cps       | 0.4 %         |
| 75As (KED)  | 20.246 ppb            | 36,275 cps        | 0.7 %         |
| 80Se (KED)  | 20.744 ppb            | 13,998 cps        | 1.6 %         |
| 85Rb (KED)  | 20.268 ppb            | 131,869 cps       | 0.6 %         |
| 88Sr (KED)  | 20.132 ppb            | 184,238 cps       | 1.5 %         |
| 89Y (KED)   | 126.498 %             | 464,697 cps       | 0.6 %         |
| 107Ag (KED) | 20.583 ppb            | 1,213,315 cps     | 0.6 %         |
| 114Cd (KED) | 20.205 ppb            | 459,281 cps       | 1.0 %         |
| 115In (KED) | 124.268 %             | 864,429 cps       | 1.2 %         |
| 133Cs (KED) | 20.128 ppb            | 649,374 cps       | 0.9 %         |
| 138Ba (KED) | 20.173 ppb            | 875,847 cps       | 0.6 %         |
| 139La (KED) | 19.116 ppb            | 1,802,129 cps     | 0.3 %         |
| 140Ce (KED) | 19.029 ppb            | 2,396,241 cps     | 0.5 %         |
| 141Pr (KED) | 19.180 ppb            | 2,551,024 cps     | 0.7 %         |
| 142Nd (KED) | 19.494 ppb            | 1,036,027 cps     | 0.8 %         |
| 152Sm (KED) | 19.690 ppb            | 937,484 cps       | 0.6 %         |
| 153Eu (KED) | 19.337 ppb            | 1,857,829 cps     | 0.7 %         |
| 158Gd (KED) | 19.648 ppb            | 1,263,445 cps     | 0.7 %         |
| 159Tb (KED) | 124.376 %             | 4,432,522 cps     | 1.2 %         |
| 164Dy (KED) | 19.381 ppb            | 1,400,183 cps     | 0.7 %         |
| 166Er (KED) | 19.422 ppb            | 1,658,355 cps     | 1.3 %         |
| 169Tm (KED) | 19.809 ppb            | 5,729,688 cps     | 0.6 %         |
| 174Yb (KED) | 19.231 ppb            | 1,982,284 cps     | 0.7 %         |
| 175Lu (KED) | 18.915 ppb            | 3,358,796 cps     | 0.6 %         |
| 205Tl (KED) | 19.128 ppb            | 3,865,078 cps     | 1.7 %         |
| 208Pb (KED) | 19.293 ppb            | 2,768,756 cps     | 0.2 %         |
| 209Bi (KED) | 121.252 %             | 3,865,184 cps     | 2.1 %         |
| 232Th (KED) | 19.399 ppb            | 5,353,712 cps     | 1.2 %         |
| 238U (KED)  | 19.636 ppb            | 6,438,739 cps     | 0.3 %         |

## Sample Summary

Instrument ID: iCAP Q

Analysis index: 5

Analysis name: 50+20

Analysis started at: 10/20/2021 3:51:51 PM

User name: WINDOWS-UPCI4ER\Administrator

| Category    | Concentration average | Concentration RSD |
|-------------|-----------------------|-------------------|
| 6Li (KED)   | 118.415 %             |                   |
| 9Be (KED)   | 48.957 ppb            | 4.5 %             |
| 11B (KED)   | 47.970 ppb            | 4.2 %             |
| 24Mg (KED)  | 49.398 ppb            | 4.7 %             |
| 27Al (KED)  | 51.347 ppb            | 2.1 %             |
| 45Sc (KED)  | 130.545 %             |                   |
| 51V (KED)   | 49.858 ppb            | 1.7 %             |
| 52Cr (KED)  | 50.126 ppb            | 1.1 %             |
| 55Mn (KED)  | 49.651 ppb            | 1.7 %             |
| 56Fe (KED)  | 50.198 ppb            | 1.3 %             |
| 58Ni (KED)  | 50.846 ppb            | 2.4 %             |
| 59Co (KED)  | 50.604 ppb            | 2.2 %             |
| 63Cu (KED)  | 50.130 ppb            | 1.3 %             |
| 64Zn (KED)  | 52.545 ppb            | 1.0 %             |
| 69Ga (KED)  | 49.691 ppb            | 0.7 %             |
| 75As (KED)  | 49.532 ppb            | 0.9 %             |
| 80Se (KED)  | 49.684 ppb            | 2.3 %             |
| 85Rb (KED)  | 48.993 ppb            | 0.6 %             |
| 88Sr (KED)  | 49.208 ppb            | 1.7 %             |
| 89Y (KED)   | 130.592 %             |                   |
| 107Ag (KED) | 49.730 ppb            | 1.1 %             |
| 114Cd (KED) | 49.666 ppb            | 1.1 %             |
| 115In (KED) | 128.175 %             |                   |
| 133Cs (KED) | 49.701 ppb            | 0.8 %             |
| 138Ba (KED) | 49.858 ppb            | 2.2 %             |
| 139La (KED) | 48.878 ppb            | 1.3 %             |
| 140Ce (KED) | 49.701 ppb            | 1.3 %             |
| 141Pr (KED) | 49.110 ppb            | 1.2 %             |
| 142Nd (KED) | 48.022 ppb            | 2.2 %             |
| 152Sm (KED) | 47.484 ppb            | 0.9 %             |
| 153Eu (KED) | 49.120 ppb            | 0.7 %             |
| 158Gd (KED) | 47.597 ppb            | 1.9 %             |
| 159Tb (KED) | 127.417 %             |                   |
| 164Dy (KED) | 47.156 ppb            | 0.6 %             |
| 166Er (KED) | 48.025 ppb            | 1.7 %             |
| 169Tm (KED) | 49.851 ppb            | 1.8 %             |
| 174Yb (KED) | 49.370 ppb            | 2.9 %             |
| 175Lu (KED) | 49.351 ppb            | 2.9 %             |
| 205Tl (KED) | 49.567 ppb            | 0.8 %             |
| 208Pb (KED) | 49.882 ppb            | 1.7 %             |
| 209Bi (KED) | 122.750 %             |                   |
| 232Th (KED) | 48.751 ppb            | 0.9 %             |
| 238U (KED)  | 48.576 ppb            | 0.9 %             |

| Category   | Concentration average | Intensity average | Intensity RSD |
|------------|-----------------------|-------------------|---------------|
| 6Li (KED)  | 118.415 %             | 3,137 cps         | 3.2 %         |
| 9Be (KED)  | 48.957 ppb            | 8,709 cps         | 2.2 %         |
| 11B (KED)  | 47.970 ppb            | 4,868 cps         | 0.7 %         |
| 24Mg (KED) | 49.398 ppb            | 28,654 cps        | 1.6 %         |
| 27Al (KED) | 51.347 ppb            | 7,983 cps         | 0.5 %         |

# Comprehensive

10/20/2021 6:11:31 PM

| Category    | Concentration average | Intensity average | Intensity RSD |
|-------------|-----------------------|-------------------|---------------|
| 45Sc (KED)  | 130.545 %             | 51,581 cps        | 1.8 %         |
| 51V (KED)   | 49.858 ppb            | 453,259 cps       | 0.8 %         |
| 52Cr (KED)  | 50.126 ppb            | 717,141 cps       | 0.8 %         |
| 55Mn (KED)  | 49.651 ppb            | 365,615 cps       | 0.2 %         |
| 56Fe (KED)  | 50.198 ppb            | 669,112 cps       | 0.6 %         |
| 58Ni (KED)  | 50.846 ppb            | 892,003 cps       | 0.6 %         |
| 59Co (KED)  | 50.604 ppb            | 1,454,556 cps     | 0.8 %         |
| 63Cu (KED)  | 50.130 ppb            | 1,116,723 cps     | 0.5 %         |
| 64Zn (KED)  | 52.545 ppb            | 358,717 cps       | 0.6 %         |
| 69Ga (KED)  | 49.691 ppb            | 365,055 cps       | 0.3 %         |
| 75As (KED)  | 49.532 ppb            | 91,585 cps        | 0.6 %         |
| 80Se (KED)  | 49.684 ppb            | 32,892 cps        | 1.2 %         |
| 85Rb (KED)  | 48.993 ppb            | 329,051 cps       | 0.5 %         |
| 88Sr (KED)  | 49.208 ppb            | 464,573 cps       | 1.5 %         |
| 89Y (KED)   | 130.592 %             | 479,734 cps       | 1.1 %         |
| 107Ag (KED) | 49.730 ppb            | 3,023,923 cps     | 1.4 %         |
| 114Cd (KED) | 49.666 ppb            | 1,164,389 cps     | 1.2 %         |
| 115In (KED) | 128.175 %             | 891,607 cps       | 0.4 %         |
| 133Cs (KED) | 49.701 ppb            | 1,653,963 cps     | 1.2 %         |
| 138Ba (KED) | 49.858 ppb            | 2,214,947 cps     | 1.4 %         |
| 139La (KED) | 48.878 ppb            | 4,720,281 cps     | 0.4 %         |
| 140Ce (KED) | 49.701 ppb            | 6,411,480 cps     | 0.7 %         |
| 141Pr (KED) | 49.110 ppb            | 6,691,367 cps     | 1.0 %         |
| 142Nd (KED) | 48.022 ppb            | 2,614,386 cps     | 1.0 %         |
| 152Sm (KED) | 47.484 ppb            | 2,316,287 cps     | 0.7 %         |
| 153Eu (KED) | 49.120 ppb            | 4,834,632 cps     | 1.0 %         |
| 158Gd (KED) | 47.597 ppb            | 3,135,154 cps     | 1.0 %         |
| 159Tb (KED) | 127.417 %             | 4,540,883 cps     | 1.4 %         |
| 164Dy (KED) | 47.156 ppb            | 3,490,535 cps     | 1.7 %         |
| 166Er (KED) | 48.025 ppb            | 4,199,363 cps     | 0.7 %         |
| 169Tm (KED) | 49.851 ppb            | 14,772,021 cps    | 1.2 %         |
| 174Yb (KED) | 49.370 ppb            | 5,212,646 cps     | 1.7 %         |
| 175Lu (KED) | 49.351 ppb            | 8,916,135 cps     | 1.6 %         |
| 205Tl (KED) | 49.567 ppb            | 10,140,272 cps    | 0.5 %         |
| 208Pb (KED) | 49.882 ppb            | 7,239,896 cps     | 2.0 %         |
| 209Bi (KED) | 122.750 %             | 3,912,952 cps     | 0.3 %         |
| 232Th (KED) | 48.751 ppb            | 13,625,533 cps    | 1.0 %         |
| 238U (KED)  | 48.576 ppb            | 16,128,902 cps    | 0.8 %         |

## Sample Summary

Instrument ID: iCAP Q

Analysis index: 6

Analysis name: 100+20

Analysis started at: 10/20/2021 3:56:00 PM

User name: WINDOWS-UPCI4ER\Administrator

| Category    | Concentration average | Concentration RSD |
|-------------|-----------------------|-------------------|
| 6Li (KED)   | 118.121 %             |                   |
| 9Be (KED)   | 100.562 ppb           | 2.7 %             |
| 11B (KED)   | 100.913 ppb           | 1.5 %             |
| 24Mg (KED)  | 100.344 ppb           | 3.0 %             |
| 27Al (KED)  | 99.052 ppb            | 2.6 %             |
| 45Sc (KED)  | 131.508 %             |                   |
| 51V (KED)   | 100.047 ppb           | 2.1 %             |
| 52Cr (KED)  | 99.811 ppb            | 1.3 %             |
| 55Mn (KED)  | 100.167 ppb           | 2.3 %             |
| 56Fe (KED)  | 99.830 ppb            | 1.5 %             |
| 58Ni (KED)  | 99.432 ppb            | 0.9 %             |
| 59Co (KED)  | 99.588 ppb            | 1.2 %             |
| 63Cu (KED)  | 99.772 ppb            | 0.2 %             |
| 64Zn (KED)  | 98.618 ppb            | 1.1 %             |
| 69Ga (KED)  | 100.159 ppb           | 0.2 %             |
| 75As (KED)  | 100.185 ppb           | 1.0 %             |
| 80Se (KED)  | 100.009 ppb           | 1.4 %             |
| 85Rb (KED)  | 100.450 ppb           | 1.2 %             |
| 88Sr (KED)  | 100.370 ppb           | 0.7 %             |
| 89Y (KED)   | 130.145 %             |                   |
| 107Ag (KED) | 100.018 ppb           | 0.6 %             |
| 114Cd (KED) | 100.126 ppb           | 0.2 %             |
| 115In (KED) | 127.259 %             |                   |
| 133Cs (KED) | 100.124 ppb           | 1.8 %             |
| 138Ba (KED) | 100.037 ppb           | 0.8 %             |
| 139La (KED) | 100.738 ppb           | 2.1 %             |
| 140Ce (KED) | 100.344 ppb           | 0.9 %             |
| 141Pr (KED) | 100.609 ppb           | 1.7 %             |
| 142Nd (KED) | 101.090 ppb           | 1.8 %             |
| 152Sm (KED) | 101.320 ppb           | 1.8 %             |
| 153Eu (KED) | 100.573 ppb           | 2.6 %             |
| 158Gd (KED) | 101.272 ppb           | 1.4 %             |
| 159Tb (KED) | 127.381 %             |                   |
| 164Dy (KED) | 101.546 ppb           | 0.7 %             |
| 166Er (KED) | 101.103 ppb           | 1.8 %             |
| 169Tm (KED) | 100.113 ppb           | 0.9 %             |
| 174Yb (KED) | 100.469 ppb           | 0.7 %             |
| 175Lu (KED) | 100.542 ppb           | 2.1 %             |
| 205Tl (KED) | 100.391 ppb           | 1.2 %             |
| 208Pb (KED) | 100.200 ppb           | 1.8 %             |
| 209Bi (KED) | 122.391 %             |                   |
| 232Th (KED) | 100.745 ppb           | 1.8 %             |
| 238U (KED)  | 100.785 ppb           | 0.9 %             |

| Category   | Concentration average | Intensity average | Intensity RSD |
|------------|-----------------------|-------------------|---------------|
| 6Li (KED)  | 118.121 %             | 3,129 cps         | 2.0 %         |
| 9Be (KED)  | 100.562 ppb           | 17,852 cps        | 0.9 %         |
| 11B (KED)  | 100.913 ppb           | 9,839 cps         | 0.6 %         |
| 24Mg (KED) | 100.344 ppb           | 57,997 cps        | 1.6 %         |
| 27Al (KED) | 99.052 ppb            | 15,417 cps        | 0.7 %         |

# Comprehensive

10/20/2021 6:11:31 PM

| Category    | Concentration average | Intensity average | Intensity RSD |
|-------------|-----------------------|-------------------|---------------|
| 45Sc (KED)  | 131.508 %             | 51,961 cps        | 1.9 %         |
| 51V (KED)   | 100.047 ppb           | 916,188 cps       | 0.7 %         |
| 52Cr (KED)  | 99.811 ppb            | 1,438,382 cps     | 0.6 %         |
| 55Mn (KED)  | 100.167 ppb           | 742,932 cps       | 0.9 %         |
| 56Fe (KED)  | 99.830 ppb            | 1,338,375 cps     | 1.3 %         |
| 58Ni (KED)  | 99.432 ppb            | 1,757,173 cps     | 1.0 %         |
| 59Co (KED)  | 99.588 ppb            | 2,883,935 cps     | 0.8 %         |
| 63Cu (KED)  | 99.772 ppb            | 2,214,273 cps     | 1.1 %         |
| 64Zn (KED)  | 98.618 ppb            | 669,986 cps       | 0.3 %         |
| 69Ga (KED)  | 100.159 ppb           | 733,239 cps       | 1.2 %         |
| 75As (KED)  | 100.185 ppb           | 184,583 cps       | 0.7 %         |
| 80Se (KED)  | 100.009 ppb           | 64,753 cps        | 1.9 %         |
| 85Rb (KED)  | 100.450 ppb           | 672,281 cps       | 0.1 %         |
| 88Sr (KED)  | 100.370 ppb           | 944,119 cps       | 0.7 %         |
| 89Y (KED)   | 130.145 %             | 478,094 cps       | 1.3 %         |
| 107Ag (KED) | 100.018 ppb           | 6,038,080 cps     | 0.3 %         |
| 114Cd (KED) | 100.126 ppb           | 2,330,554 cps     | 0.1 %         |
| 115In (KED) | 127.259 %             | 885,237 cps       | 0.3 %         |
| 133Cs (KED) | 100.124 ppb           | 3,308,072 cps     | 1.9 %         |
| 138Ba (KED) | 100.037 ppb           | 4,441,626 cps     | 0.9 %         |
| 139La (KED) | 100.738 ppb           | 9,725,232 cps     | 1.0 %         |
| 140Ce (KED) | 100.344 ppb           | 12,941,195 cps    | 0.7 %         |
| 141Pr (KED) | 100.609 ppb           | 13,704,139 cps    | 1.3 %         |
| 142Nd (KED) | 101.090 ppb           | 5,502,094 cps     | 0.5 %         |
| 152Sm (KED) | 101.320 ppb           | 4,941,580 cps     | 2.5 %         |
| 153Eu (KED) | 100.573 ppb           | 9,894,468 cps     | 1.3 %         |
| 158Gd (KED) | 101.272 ppb           | 6,669,012 cps     | 0.4 %         |
| 159Tb (KED) | 127.381 %             | 4,539,625 cps     | 1.3 %         |
| 164Dy (KED) | 101.546 ppb           | 7,513,954 cps     | 1.0 %         |
| 166Er (KED) | 101.103 ppb           | 8,837,557 cps     | 0.5 %         |
| 169Tm (KED) | 100.113 ppb           | 29,663,049 cps    | 2.1 %         |
| 174Yb (KED) | 100.469 ppb           | 10,607,279 cps    | 1.1 %         |
| 175Lu (KED) | 100.542 ppb           | 18,122,754 cps    | 0.9 %         |
| 205Tl (KED) | 100.391 ppb           | 20,476,416 cps    | 0.9 %         |
| 208Pb (KED) | 100.200 ppb           | 14,492,225 cps    | 0.8 %         |
| 209Bi (KED) | 122.391 %             | 3,901,498 cps     | 1.3 %         |
| 232Th (KED) | 100.745 ppb           | 28,070,224 cps    | 0.5 %         |
| 238U (KED)  | 100.785 ppb           | 33,363,994 cps    | 0.5 %         |

## Sample Summary

Instrument ID: iCAP Q

Analysis index: 7

Analysis name: 191083ti

Analysis started at: 10/20/2021 4:00:23 PM

User name: WINDOWS-UPCI4ER\Administrator

| Category    | Concentration average | Concentration RSD |
|-------------|-----------------------|-------------------|
| 6Li (KED)   | 116.443 %             | 4.1 %             |
| 9Be (KED)   | 0.058 ppb             | 111.1 %           |
| 11B (KED)   | 6.894 ppb             | 15.5 %            |
| 24Mg (KED)  | 111.095 ppb           | 4.7 %             |
| 27Al (KED)  | 71.441 ppb            | 2.4 %             |
| 45Sc (KED)  | 121.084 %             | 1.9 %             |
| 51V (KED)   | 0.147 ppb             | 14.9 %            |
| 52Cr (KED)  | 0.610 ppb             | 6.9 %             |
| 55Mn (KED)  | 2.493 ppb             | 2.3 %             |
| 56Fe (KED)  | 81.377 ppb            | 0.5 %             |
| 58Ni (KED)  | 0.600 ppb             | 3.8 %             |
| 59Co (KED)  | 0.054 ppb             | 29.4 %            |
| 63Cu (KED)  | 2.355 ppb             | 1.5 %             |
| 64Zn (KED)  | 56.905 ppb            | 1.1 %             |
| 69Ga (KED)  | 0.403 ppb             | 4.8 %             |
| 75As (KED)  | 0.046 ppb             | 14.4 %            |
| 80Se (KED)  | 0.094 ppb             | 117.0 %           |
| 85Rb (KED)  | 0.950 ppb             | 3.8 %             |
| 88Sr (KED)  | 2.243 ppb             | 2.7 %             |
| 89Y (KED)   | 122.965 %             | 2.5 %             |
| 107Ag (KED) | 0.062 ppb             | 16.5 %            |
| 114Cd (KED) | 0.007 ppb             | 42.3 %            |
| 115In (KED) | 120.597 %             | 1.7 %             |
| 133Cs (KED) | 0.022 ppb             | 13.0 %            |
| 138Ba (KED) | 1.438 ppb             | 1.9 %             |
| 139La (KED) | 0.069 ppb             | 1.1 %             |
| 140Ce (KED) | 0.164 ppb             | 0.7 %             |
| 141Pr (KED) | 0.019 ppb             | 9.2 %             |
| 142Nd (KED) | 0.097 ppb             | 1.4 %             |
| 152Sm (KED) | 0.013 ppb             | 6.5 %             |
| 153Eu (KED) | 0.004 ppb             | 33.3 %            |
| 158Gd (KED) | 0.012 ppb             | 5.9 %             |
| 159Tb (KED) | 121.837 %             | 3.3 %             |
| 164Dy (KED) | 0.153 ppb             | 163.8 %           |
| 166Er (KED) | 0.147 ppb             | 168.8 %           |
| 169Tm (KED) | 0.123 ppb             | 171.0 %           |
| 174Yb (KED) | 0.111 ppb             | 167.7 %           |
| 175Lu (KED) | 0.009 ppb             | 1,643.8 %         |
| 205Tl (KED) | 0.071 ppb             | 159.0 %           |
| 208Pb (KED) | 0.399 ppb             | 25.0 %            |
| 209Bi (KED) | 117.153 %             | 0.5 %             |
| 232Th (KED) | 0.141 ppb             | 54.4 %            |
| 238U (KED)  | 0.041 ppb             | 139.3 %           |

| Category   | Concentration average | Intensity average | Intensity RSD |
|------------|-----------------------|-------------------|---------------|
| 6Li (KED)  | 116.443 %             | 3,085 cps         | 4.1 %         |
| 9Be (KED)  | 0.058 ppb             | 11 cps            | 96.4 %        |
| 11B (KED)  | 6.894 ppb             | 978 cps           | 6.1 %         |
| 24Mg (KED) | 111.095 ppb           | 63,229 cps        | 0.8 %         |
| 27Al (KED) | 71.441 ppb            | 10,268 cps        | 3.0 %         |

# Comprehensive

10/20/2021 6:11:31 PM

| Category    | Concentration average | Intensity average | Intensity RSD |
|-------------|-----------------------|-------------------|---------------|
| 45Sc (KED)  | 121.084 %             | 47,843 cps        | 1.9 %         |
| 51V (KED)   | 0.147 ppb             | 1,247 cps         | 13.2 %        |
| 52Cr (KED)  | 0.610 ppb             | 8,152 cps         | 5.8 %         |
| 55Mn (KED)  | 2.493 ppb             | 17,067 cps        | 1.2 %         |
| 56Fe (KED)  | 81.377 ppb            | 1,005,044 cps     | 2.2 %         |
| 58Ni (KED)  | 0.600 ppb             | 10,102 cps        | 1.9 %         |
| 59Co (KED)  | 0.054 ppb             | 1,462 cps         | 27.4 %        |
| 63Cu (KED)  | 2.355 ppb             | 50,157 cps        | 1.0 %         |
| 64Zn (KED)  | 56.905 ppb            | 365,671 cps       | 1.4 %         |
| 69Ga (KED)  | 0.403 ppb             | 2,869 cps         | 3.5 %         |
| 75As (KED)  | 0.046 ppb             | 102 cps           | 11.5 %        |
| 80Se (KED)  | 0.094 ppb             | 1,211 cps         | 3.8 %         |
| 85Rb (KED)  | 0.950 ppb             | 6,024 cps         | 1.5 %         |
| 88Sr (KED)  | 2.243 ppb             | 20,131 cps        | 1.0 %         |
| 89Y (KED)   | 122.965 %             | 451,717 cps       | 2.5 %         |
| 107Ag (KED) | 0.062 ppb             | 3,553 cps         | 16.2 %        |
| 114Cd (KED) | 0.007 ppb             | 217 cps           | 31.6 %        |
| 115In (KED) | 120.597 %             | 838,891 cps       | 1.7 %         |
| 133Cs (KED) | 0.022 ppb             | 704 cps           | 11.7 %        |
| 138Ba (KED) | 1.438 ppb             | 62,724 cps        | 1.5 %         |
| 139La (KED) | 0.069 ppb             | 6,401 cps         | 2.7 %         |
| 140Ce (KED) | 0.164 ppb             | 20,382 cps        | 3.3 %         |
| 141Pr (KED) | 0.019 ppb             | 2,471 cps         | 9.9 %         |
| 142Nd (KED) | 0.097 ppb             | 5,057 cps         | 2.9 %         |
| 152Sm (KED) | 0.013 ppb             | 623 cps           | 6.8 %         |
| 153Eu (KED) | 0.004 ppb             | 373 cps           | 33.6 %        |
| 158Gd (KED) | 0.012 ppb             | 764 cps           | 6.6 %         |
| 159Tb (KED) | 121.837 %             | 4,342,025 cps     | 3.3 %         |
| 164Dy (KED) | 0.153 ppb             | 10,879 cps        | 163.5 %       |
| 166Er (KED) | 0.147 ppb             | 12,831 cps        | 161.8 %       |
| 169Tm (KED) | 0.123 ppb             | 34,895 cps        | 171.0 %       |
| 174Yb (KED) | 0.111 ppb             | 11,195 cps        | 167.3 %       |
| 175Lu (KED) | 0.009 ppb             | 36,894 cps        | 68.3 %        |
| 205Tl (KED) | 0.071 ppb             | 13,986 cps        | 158.8 %       |
| 208Pb (KED) | 0.399 ppb             | 60,846 cps        | 22.8 %        |
| 209Bi (KED) | 117.153 %             | 3,734,513 cps     | 0.5 %         |
| 232Th (KED) | 0.141 ppb             | 37,622 cps        | 54.4 %        |
| 238U (KED)  | 0.041 ppb             | 13,246 cps        | 138.3 %       |

## Sample Summary

Instrument ID: iCAP Q

Analysis index: 8

Analysis name: 191077ti

Analysis started at: 10/20/2021 4:04:51 PM

User name: WINDOWS-UPCI4ER\Administrator

| Category    | Concentration average | Concentration RSD |
|-------------|-----------------------|-------------------|
| 6Li (KED)   | 120.177 %             | 2.7 %             |
| 9Be (KED)   | 0.037 ppb             | 161.6 %           |
| 11B (KED)   | 5.513 ppb             | 11.5 %            |
| 24Mg (KED)  | 100.275 ppb           | 0.4 %             |
| 27Al (KED)  | 64.501 ppb            | 0.9 %             |
| 45Sc (KED)  | 121.897 %             | 1.7 %             |
| 51V (KED)   | 0.121 ppb             | 4.2 %             |
| 52Cr (KED)  | 0.612 ppb             | 4.5 %             |
| 55Mn (KED)  | 2.604 ppb             | 2.9 %             |
| 56Fe (KED)  | 83.123 ppb            | 1.7 %             |
| 58Ni (KED)  | 0.514 ppb             | 1.5 %             |
| 59Co (KED)  | 0.050 ppb             | 0.9 %             |
| 63Cu (KED)  | 2.829 ppb             | 0.9 %             |
| 64Zn (KED)  | 63.649 ppb            | 1.5 %             |
| 69Ga (KED)  | 0.367 ppb             | 3.7 %             |
| 75As (KED)  | 0.059 ppb             | 4.6 %             |
| 80Se (KED)  | 0.068 ppb             | 280.5 %           |
| 85Rb (KED)  | 0.677 ppb             | 2.3 %             |
| 88Sr (KED)  | 2.024 ppb             | 0.8 %             |
| 89Y (KED)   | 121.865 %             | 1.6 %             |
| 107Ag (KED) | 0.032 ppb             | 7.1 %             |
| 114Cd (KED) | 0.012 ppb             | 2.8 %             |
| 115In (KED) | 118.605 %             | 0.5 %             |
| 133Cs (KED) | 0.019 ppb             | 4.7 %             |
| 138Ba (KED) | 1.326 ppb             | 1.8 %             |
| 139La (KED) | 0.067 ppb             | 2.1 %             |
| 140Ce (KED) | 0.151 ppb             | 2.1 %             |
| 141Pr (KED) | 0.017 ppb             | 1.3 %             |
| 142Nd (KED) | 0.093 ppb             | 2.2 %             |
| 152Sm (KED) | 0.013 ppb             | 1.1 %             |
| 153Eu (KED) | 0.003 ppb             | 5.2 %             |
| 158Gd (KED) | 0.010 ppb             | 12.6 %            |
| 159Tb (KED) | 120.589 %             | 1.8 %             |
| 164Dy (KED) | 0.007 ppb             | 12.7 %            |
| 166Er (KED) | 0.001 ppb             | 52.1 %            |
| 169Tm (KED) | 0.001 ppb             | 14.2 %            |
| 174Yb (KED) | 0.003 ppb             | 2.1 %             |
| 175Lu (KED) | -0.083 ppb            | 3.6 %             |
| 205Tl (KED) | 0.004 ppb             | 12.3 %            |
| 208Pb (KED) | 0.580 ppb             | 1.4 %             |
| 209Bi (KED) | 116.068 %             | 0.6 %             |
| 232Th (KED) | 0.031 ppb             | 11.3 %            |
| 238U (KED)  | 0.006 ppb             | 5.0 %             |

| Category   | Concentration average | Intensity average | Intensity RSD |
|------------|-----------------------|-------------------|---------------|
| 6Li (KED)  | 120.177 %             | 3,184 cps         | 2.7 %         |
| 9Be (KED)  | 0.037 ppb             | 8 cps             | 137.8 %       |
| 11B (KED)  | 5.513 ppb             | 879 cps           | 5.6 %         |
| 24Mg (KED) | 100.275 ppb           | 58,989 cps        | 3.1 %         |
| 27Al (KED) | 64.501 ppb            | 9,342 cps         | 2.5 %         |

# Comprehensive

10/20/2021 6:11:31 PM

| Category    | Concentration average | Intensity average | Intensity RSD |
|-------------|-----------------------|-------------------|---------------|
| 45Sc (KED)  | 121.897 %             | 48,164 cps        | 1.7 %         |
| 51V (KED)   | 0.121 ppb             | 1,030 cps         | 4.4 %         |
| 52Cr (KED)  | 0.612 ppb             | 8,246 cps         | 4.5 %         |
| 55Mn (KED)  | 2.604 ppb             | 17,958 cps        | 4.5 %         |
| 56Fe (KED)  | 83.123 ppb            | 1,033,505 cps     | 2.9 %         |
| 58Ni (KED)  | 0.514 ppb             | 8,780 cps         | 2.7 %         |
| 59Co (KED)  | 0.050 ppb             | 1,368 cps         | 0.9 %         |
| 63Cu (KED)  | 2.829 ppb             | 59,571 cps        | 0.7 %         |
| 64Zn (KED)  | 63.649 ppb            | 405,267 cps       | 1.6 %         |
| 69Ga (KED)  | 0.367 ppb             | 2,601 cps         | 4.9 %         |
| 75As (KED)  | 0.059 ppb             | 123 cps           | 2.7 %         |
| 80Se (KED)  | 0.068 ppb             | 1,185 cps         | 8.4 %         |
| 85Rb (KED)  | 0.677 ppb             | 4,256 cps         | 1.1 %         |
| 88Sr (KED)  | 2.024 ppb             | 18,033 cps        | 0.8 %         |
| 89Y (KED)   | 121.865 %             | 447,676 cps       | 1.6 %         |
| 107Ag (KED) | 0.032 ppb             | 1,806 cps         | 7.1 %         |
| 114Cd (KED) | 0.012 ppb             | 317 cps           | 2.1 %         |
| 115In (KED) | 118.605 %             | 825,035 cps       | 0.5 %         |
| 133Cs (KED) | 0.019 ppb             | 597 cps           | 5.0 %         |
| 138Ba (KED) | 1.326 ppb             | 57,400 cps        | 3.4 %         |
| 139La (KED) | 0.067 ppb             | 6,168 cps         | 2.1 %         |
| 140Ce (KED) | 0.151 ppb             | 18,523 cps        | 3.8 %         |
| 141Pr (KED) | 0.017 ppb             | 2,132 cps         | 1.9 %         |
| 142Nd (KED) | 0.093 ppb             | 4,818 cps         | 1.9 %         |
| 152Sm (KED) | 0.013 ppb             | 584 cps           | 2.9 %         |
| 153Eu (KED) | 0.003 ppb             | 282 cps           | 5.9 %         |
| 158Gd (KED) | 0.010 ppb             | 619 cps           | 13.9 %        |
| 159Tb (KED) | 120.589 %             | 4,297,566 cps     | 1.8 %         |
| 164Dy (KED) | 0.007 ppb             | 507 cps           | 13.7 %        |
| 166Er (KED) | 0.001 ppb             | 647 cps           | 10.8 %        |
| 169Tm (KED) | 0.001 ppb             | 183 cps           | 14.4 %        |
| 174Yb (KED) | 0.003 ppb             | 348 cps           | 3.6 %         |
| 175Lu (KED) | -0.083 ppb            | 20,872 cps        | 1.0 %         |
| 205Tl (KED) | 0.004 ppb             | 714 cps           | 11.8 %        |
| 208Pb (KED) | 0.580 ppb             | 85,179 cps        | 1.8 %         |
| 209Bi (KED) | 116.068 %             | 3,699,927 cps     | 0.6 %         |
| 232Th (KED) | 0.031 ppb             | 8,329 cps         | 11.3 %        |
| 238U (KED)  | 0.006 ppb             | 1,849 cps         | 4.5 %         |

## Sample Summary

Instrument ID: iCAP Q

Analysis index: 9

Analysis name: 191063ti

Analysis started at: 10/20/2021 4:09:09 PM

User name: WINDOWS-UPCI4ER\Administrator

| Category    | Concentration average | Concentration RSD |
|-------------|-----------------------|-------------------|
| 6Li (KED)   | 124.372 %             | 1.6 %             |
| 9Be (KED)   | 0.023 ppb             | 44.8 %            |
| 11B (KED)   | 15.762 ppb            | 2.1 %             |
| 24Mg (KED)  | 323.152 ppb           | 1.9 %             |
| 27Al (KED)  | 299.883 ppb           | 2.8 %             |
| 45Sc (KED)  | 131.386 %             | 1.8 %             |
| 51V (KED)   | 0.543 ppb             | 3.8 %             |
| 52Cr (KED)  | 0.801 ppb             | 1.8 %             |
| 55Mn (KED)  | 9.398 ppb             | 1.8 %             |
| 56Fe (KED)  | 335.354 ppb           | 2.1 %             |
| 58Ni (KED)  | 1.428 ppb             | 1.2 %             |
| 59Co (KED)  | 0.156 ppb             | 2.5 %             |
| 63Cu (KED)  | 2.576 ppb             | 0.5 %             |
| 64Zn (KED)  | 56.701 ppb            | 0.3 %             |
| 69Ga (KED)  | 1.250 ppb             | 0.7 %             |
| 75As (KED)  | 0.176 ppb             | 15.4 %            |
| 80Se (KED)  | 0.131 ppb             | 53.3 %            |
| 85Rb (KED)  | 1.825 ppb             | 1.6 %             |
| 88Sr (KED)  | 6.486 ppb             | 0.5 %             |
| 89Y (KED)   | 127.393 %             | 1.7 %             |
| 107Ag (KED) | 0.030 ppb             | 3.7 %             |
| 114Cd (KED) | 0.015 ppb             | 21.0 %            |
| 115In (KED) | 122.775 %             | 0.8 %             |
| 133Cs (KED) | 0.061 ppb             | 3.7 %             |
| 138Ba (KED) | 4.388 ppb             | 1.0 %             |
| 139La (KED) | 0.340 ppb             | 2.6 %             |
| 140Ce (KED) | 0.711 ppb             | 0.1 %             |
| 141Pr (KED) | 0.085 ppb             | 3.8 %             |
| 142Nd (KED) | 0.445 ppb             | 0.9 %             |
| 152Sm (KED) | 0.058 ppb             | 3.0 %             |
| 153Eu (KED) | 0.011 ppb             | 2.1 %             |
| 158Gd (KED) | 0.051 ppb             | 7.0 %             |
| 159Tb (KED) | 126.910 %             | 1.7 %             |
| 164Dy (KED) | 0.034 ppb             | 2.7 %             |
| 166Er (KED) | 0.016 ppb             | 1.6 %             |
| 169Tm (KED) | 0.002 ppb             | 12.2 %            |
| 174Yb (KED) | 0.013 ppb             | 2.8 %             |
| 175Lu (KED) | -0.086 ppb            | 1.9 %             |
| 205Tl (KED) | 0.007 ppb             | 7.6 %             |
| 208Pb (KED) | 0.563 ppb             | 1.5 %             |
| 209Bi (KED) | 118.754 %             | 0.5 %             |
| 232Th (KED) | 0.094 ppb             | 1.3 %             |
| 238U (KED)  | 0.017 ppb             | 3.1 %             |

| Category   | Concentration average | Intensity average | Intensity RSD |
|------------|-----------------------|-------------------|---------------|
| 6Li (KED)  | 124.372 %             | 3,295 cps         | 1.6 %         |
| 9Be (KED)  | 0.023 ppb             | 6 cps             | 34.6 %        |
| 11B (KED)  | 15.762 ppb            | 1,926 cps         | 2.1 %         |
| 24Mg (KED) | 323.152 ppb           | 196,449 cps       | 0.3 %         |
| 27Al (KED) | 299.883 ppb           | 46,441 cps        | 3.2 %         |

# Comprehensive

10/20/2021 6:11:31 PM

| Category    | Concentration average | Intensity average | Intensity RSD |
|-------------|-----------------------|-------------------|---------------|
| 45Sc (KED)  | 131.386 %             | 51,913 cps        | 1.8 %         |
| 51V (KED)   | 0.543 ppb             | 4,972 cps         | 3.0 %         |
| 52Cr (KED)  | 0.801 ppb             | 11,600 cps        | 3.2 %         |
| 55Mn (KED)  | 9.398 ppb             | 69,710 cps        | 2.9 %         |
| 56Fe (KED)  | 335.354 ppb           | 4,486,634 cps     | 1.8 %         |
| 58Ni (KED)  | 1.428 ppb             | 25,585 cps        | 1.3 %         |
| 59Co (KED)  | 0.156 ppb             | 4,545 cps         | 3.5 %         |
| 63Cu (KED)  | 2.576 ppb             | 56,774 cps        | 1.5 %         |
| 64Zn (KED)  | 56.701 ppb            | 377,547 cps       | 1.6 %         |
| 69Ga (KED)  | 1.250 ppb             | 9,047 cps         | 1.8 %         |
| 75As (KED)  | 0.176 ppb             | 339 cps           | 12.7 %        |
| 80Se (KED)  | 0.131 ppb             | 1,279 cps         | 3.7 %         |
| 85Rb (KED)  | 1.825 ppb             | 11,976 cps        | 3.1 %         |
| 88Sr (KED)  | 6.486 ppb             | 59,933 cps        | 2.1 %         |
| 89Y (KED)   | 127.393 %             | 467,985 cps       | 1.7 %         |
| 107Ag (KED) | 0.030 ppb             | 1,735 cps         | 3.5 %         |
| 114Cd (KED) | 0.015 ppb             | 394 cps           | 17.8 %        |
| 115In (KED) | 122.775 %             | 854,047 cps       | 0.8 %         |
| 133Cs (KED) | 0.061 ppb             | 1,955 cps         | 4.0 %         |
| 138Ba (KED) | 4.388 ppb             | 195,785 cps       | 1.5 %         |
| 139La (KED) | 0.340 ppb             | 32,752 cps        | 1.6 %         |
| 140Ce (KED) | 0.711 ppb             | 91,521 cps        | 1.8 %         |
| 141Pr (KED) | 0.085 ppb             | 11,603 cps        | 4.0 %         |
| 142Nd (KED) | 0.445 ppb             | 24,158 cps        | 0.8 %         |
| 152Sm (KED) | 0.058 ppb             | 2,846 cps         | 3.7 %         |
| 153Eu (KED) | 0.011 ppb             | 1,094 cps         | 3.7 %         |
| 158Gd (KED) | 0.051 ppb             | 3,363 cps         | 7.7 %         |
| 159Tb (KED) | 126.910 %             | 4,522,837 cps     | 1.7 %         |
| 164Dy (KED) | 0.034 ppb             | 2,525 cps         | 1.3 %         |
| 166Er (KED) | 0.016 ppb             | 1,912 cps         | 2.7 %         |
| 169Tm (KED) | 0.002 ppb             | 649 cps           | 11.9 %        |
| 174Yb (KED) | 0.013 ppb             | 1,357 cps         | 4.3 %         |
| 175Lu (KED) | -0.086 ppb            | 21,459 cps        | 2.3 %         |
| 205Tl (KED) | 0.007 ppb             | 1,342 cps         | 7.9 %         |
| 208Pb (KED) | 0.563 ppb             | 84,648 cps        | 1.6 %         |
| 209Bi (KED) | 118.754 %             | 3,785,579 cps     | 0.5 %         |
| 232Th (KED) | 0.094 ppb             | 25,532 cps        | 1.8 %         |
| 238U (KED)  | 0.017 ppb             | 5,508 cps         | 2.8 %         |

## Sample Summary

Instrument ID: iCAP Q

Analysis index: 10

Analysis name: w122ti

Analysis started at: 10/20/2021 4:13:24 PM

User name: WINDOWS-UPCI4ER\Administrator

| Category    | Concentration average | Concentration RSD |
|-------------|-----------------------|-------------------|
| 6Li (KED)   | 128.315 %             | 1.2 %             |
| 9Be (KED)   | -0.001 ppb            | 1,105.9 %         |
| 11B (KED)   | 0.489 ppb             | 69.4 %            |
| 24Mg (KED)  | 65.155 ppb            | 2.6 %             |
| 27Al (KED)  | 38.940 ppb            | 1.5 %             |
| 45Sc (KED)  | 136.673 %             | 1.9 %             |
| 51V (KED)   | 0.073 ppb             | 6.1 %             |
| 52Cr (KED)  | 0.694 ppb             | 2.9 %             |
| 55Mn (KED)  | 1.888 ppb             | 15.0 %            |
| 56Fe (KED)  | 54.862 ppb            | 1.0 %             |
| 58Ni (KED)  | 0.402 ppb             | 4.4 %             |
| 59Co (KED)  | 0.039 ppb             | 1.5 %             |
| 63Cu (KED)  | 2.274 ppb             | 1.1 %             |
| 64Zn (KED)  | 48.672 ppb            | 0.7 %             |
| 69Ga (KED)  | 0.277 ppb             | 1.3 %             |
| 75As (KED)  | 0.035 ppb             | 23.1 %            |
| 80Se (KED)  | -0.010 ppb            | 1,504.2 %         |
| 85Rb (KED)  | 0.389 ppb             | 1.1 %             |
| 88Sr (KED)  | 1.478 ppb             | 2.9 %             |
| 89Y (KED)   | 132.646 %             | 2.4 %             |
| 107Ag (KED) | 0.010 ppb             | 4.2 %             |
| 114Cd (KED) | 0.006 ppb             | 16.2 %            |
| 115In (KED) | 128.097 %             | 0.6 %             |
| 133Cs (KED) | 0.010 ppb             | 14.0 %            |
| 138Ba (KED) | 0.916 ppb             | 2.2 %             |
| 139La (KED) | 0.042 ppb             | 2.6 %             |
| 140Ce (KED) | 0.102 ppb             | 0.5 %             |
| 141Pr (KED) | 0.010 ppb             | 0.8 %             |
| 142Nd (KED) | 0.059 ppb             | 5.1 %             |
| 152Sm (KED) | 0.007 ppb             | 4.4 %             |
| 153Eu (KED) | 0.002 ppb             | 20.3 %            |
| 158Gd (KED) | 0.006 ppb             | 2.2 %             |
| 159Tb (KED) | 137.712 %             | 3.5 %             |
| 164Dy (KED) | 0.004 ppb             | 1.4 %             |
| 166Er (KED) | 0.000 ppb             | 173.8 %           |
| 169Tm (KED) | 0.000 ppb             | 23.8 %            |
| 174Yb (KED) | 0.002 ppb             | 22.0 %            |
| 175Lu (KED) | -0.098 ppb            | 3.8 %             |
| 205Tl (KED) | 0.002 ppb             | 12.6 %            |
| 208Pb (KED) | 0.283 ppb             | 1.4 %             |
| 209Bi (KED) | 123.667 %             | 2.0 %             |
| 232Th (KED) | 0.015 ppb             | 3.1 %             |
| 238U (KED)  | 0.004 ppb             | 11.8 %            |

| Category   | Concentration average | Intensity average | Intensity RSD |
|------------|-----------------------|-------------------|---------------|
| 6Li (KED)  | 128.315 %             | 3,399 cps         | 1.2 %         |
| 9Be (KED)  | -0.001 ppb            | 1 cps             | 173.2 %       |
| 11B (KED)  | 0.489 ppb             | 426 cps           | 7.9 %         |
| 24Mg (KED) | 65.155 ppb            | 40,955 cps        | 2.1 %         |
| 27Al (KED) | 38.940 ppb            | 6,366 cps         | 3.3 %         |

# Comprehensive

10/20/2021 6:11:31 PM

| Category    | Concentration average | Intensity average | Intensity RSD |
|-------------|-----------------------|-------------------|---------------|
| 45Sc (KED)  | 136.673 %             | 54,002 cps        | 1.9 %         |
| 51V (KED)   | 0.073 ppb             | 706 cps           | 6.3 %         |
| 52Cr (KED)  | 0.694 ppb             | 10,473 cps        | 3.6 %         |
| 55Mn (KED)  | 1.888 ppb             | 14,625 cps        | 16.1 %        |
| 56Fe (KED)  | 54.862 ppb            | 765,513 cps       | 2.1 %         |
| 58Ni (KED)  | 0.402 ppb             | 7,781 cps         | 2.3 %         |
| 59Co (KED)  | 0.039 ppb             | 1,197 cps         | 2.6 %         |
| 63Cu (KED)  | 2.274 ppb             | 52,296 cps        | 1.4 %         |
| 64Zn (KED)  | 48.672 ppb            | 337,578 cps       | 2.0 %         |
| 69Ga (KED)  | 0.277 ppb             | 2,157 cps         | 2.1 %         |
| 75As (KED)  | 0.035 ppb             | 89 cps            | 15.2 %        |
| 80Se (KED)  | -0.010 ppb            | 1,239 cps         | 5.1 %         |
| 85Rb (KED)  | 0.389 ppb             | 2,669 cps         | 1.4 %         |
| 88Sr (KED)  | 1.478 ppb             | 14,393 cps        | 1.4 %         |
| 89Y (KED)   | 132.646 %             | 487,280 cps       | 2.4 %         |
| 107Ag (KED) | 0.010 ppb             | 638 cps           | 4.7 %         |
| 114Cd (KED) | 0.006 ppb             | 207 cps           | 11.6 %        |
| 115In (KED) | 128.097 %             | 891,066 cps       | 0.6 %         |
| 133Cs (KED) | 0.010 ppb             | 357 cps           | 13.1 %        |
| 138Ba (KED) | 0.916 ppb             | 45,885 cps        | 3.5 %         |
| 139La (KED) | 0.042 ppb             | 4,401 cps         | 5.2 %         |
| 140Ce (KED) | 0.102 ppb             | 14,386 cps        | 3.2 %         |
| 141Pr (KED) | 0.010 ppb             | 1,497 cps         | 2.7 %         |
| 142Nd (KED) | 0.059 ppb             | 3,497 cps         | 6.0 %         |
| 152Sm (KED) | 0.007 ppb             | 391 cps           | 2.1 %         |
| 153Eu (KED) | 0.002 ppb             | 174 cps           | 19.1 %        |
| 158Gd (KED) | 0.006 ppb             | 466 cps           | 1.5 %         |
| 159Tb (KED) | 137.712 %             | 4,907,783 cps     | 3.5 %         |
| 164Dy (KED) | 0.004 ppb             | 381 cps           | 3.1 %         |
| 166Er (KED) | 0.000 ppb             | 581 cps           | 11.1 %        |
| 169Tm (KED) | 0.000 ppb             | 118 cps           | 26.3 %        |
| 174Yb (KED) | 0.002 ppb             | 226 cps           | 20.1 %        |
| 175Lu (KED) | -0.098 ppb            | 20,997 cps        | 4.4 %         |
| 205Tl (KED) | 0.002 ppb             | 377 cps           | 10.7 %        |
| 208Pb (KED) | 0.283 ppb             | 47,263 cps        | 3.0 %         |
| 209Bi (KED) | 123.667 %             | 3,942,188 cps     | 2.0 %         |
| 232Th (KED) | 0.015 ppb             | 4,194 cps         | 4.5 %         |
| 238U (KED)  | 0.004 ppb             | 1,331 cps         | 11.5 %        |

## Sample Summary

Instrument ID: iCAP Q

Analysis index: 11

Analysis name: 191082ti

Analysis started at: 10/20/2021 4:17:29 PM

User name: WINDOWS-UPCI4ER\Administrator

| Category    | Concentration average | Concentration RSD |
|-------------|-----------------------|-------------------|
| 6Li (KED)   | 138.929 %             | 4.6 %             |
| 9Be (KED)   | 0.004 ppb             | 228.8 %           |
| 11B (KED)   | 13.709 ppb            | 6.5 %             |
| 24Mg (KED)  | 121.336 ppb           | 3.1 %             |
| 27Al (KED)  | 59.258 ppb            | 1.3 %             |
| 45Sc (KED)  | 136.325 %             | 1.8 %             |
| 51V (KED)   | 0.105 ppb             | 3.9 %             |
| 52Cr (KED)  | 0.424 ppb             | 0.3 %             |
| 55Mn (KED)  | 2.768 ppb             | 1.3 %             |
| 56Fe (KED)  | 66.745 ppb            | 1.6 %             |
| 58Ni (KED)  | 0.401 ppb             | 1.4 %             |
| 59Co (KED)  | 0.037 ppb             | 4.8 %             |
| 63Cu (KED)  | 1.890 ppb             | 2.0 %             |
| 64Zn (KED)  | 52.217 ppb            | 1.6 %             |
| 69Ga (KED)  | 0.378 ppb             | 4.4 %             |
| 75As (KED)  | 0.046 ppb             | 23.3 %            |
| 80Se (KED)  | 0.106 ppb             | 51.0 %            |
| 85Rb (KED)  | 0.617 ppb             | 2.2 %             |
| 88Sr (KED)  | 2.507 ppb             | 1.5 %             |
| 89Y (KED)   | 132.665 %             | 0.9 %             |
| 107Ag (KED) | 0.022 ppb             | 3.4 %             |
| 114Cd (KED) | 0.009 ppb             | 4.6 %             |
| 115In (KED) | 128.920 %             | 1.3 %             |
| 133Cs (KED) | 0.013 ppb             | 1.5 %             |
| 138Ba (KED) | 1.256 ppb             | 1.1 %             |
| 139La (KED) | 0.053 ppb             | 2.2 %             |
| 140Ce (KED) | 0.118 ppb             | 2.9 %             |
| 141Pr (KED) | 0.012 ppb             | 9.6 %             |
| 142Nd (KED) | 0.074 ppb             | 1.6 %             |
| 152Sm (KED) | 0.010 ppb             | 6.5 %             |
| 153Eu (KED) | 0.002 ppb             | 7.1 %             |
| 158Gd (KED) | 0.008 ppb             | 14.2 %            |
| 159Tb (KED) | 135.937 %             | 2.0 %             |
| 164Dy (KED) | 0.006 ppb             | 7.0 %             |
| 166Er (KED) | 0.000 ppb             | 696.2 %           |
| 169Tm (KED) | 0.000 ppb             | 16.9 %            |
| 174Yb (KED) | 0.003 ppb             | 8.9 %             |
| 175Lu (KED) | -0.101 ppb            | 4.9 %             |
| 205Tl (KED) | 0.002 ppb             | 6.5 %             |
| 208Pb (KED) | 0.287 ppb             | 1.6 %             |
| 209Bi (KED) | 122.378 %             | 0.2 %             |
| 232Th (KED) | 0.017 ppb             | 2.5 %             |
| 238U (KED)  | 0.004 ppb             | 8.8 %             |

| Category   | Concentration average | Intensity average | Intensity RSD |
|------------|-----------------------|-------------------|---------------|
| 6Li (KED)  | 138.929 %             | 3,681 cps         | 4.6 %         |
| 9Be (KED)  | 0.004 ppb             | 2 cps             | 86.6 %        |
| 11B (KED)  | 13.709 ppb            | 1,921 cps         | 2.1 %         |
| 24Mg (KED) | 121.336 ppb           | 82,410 cps        | 1.8 %         |
| 27Al (KED) | 59.258 ppb            | 9,606 cps         | 1.6 %         |

# Comprehensive

10/20/2021 6:11:31 PM

| Category    | Concentration average | Intensity average | Intensity RSD |
|-------------|-----------------------|-------------------|---------------|
| 45Sc (KED)  | 136.325 %             | 53,865 cps        | 1.8 %         |
| 51V (KED)   | 0.105 ppb             | 1,007 cps         | 3.3 %         |
| 52Cr (KED)  | 0.424 ppb             | 6,414 cps         | 2.0 %         |
| 55Mn (KED)  | 2.768 ppb             | 21,343 cps        | 3.1 %         |
| 56Fe (KED)  | 66.745 ppb            | 928,299 cps       | 0.2 %         |
| 58Ni (KED)  | 0.401 ppb             | 7,739 cps         | 0.7 %         |
| 59Co (KED)  | 0.037 ppb             | 1,131 cps         | 5.3 %         |
| 63Cu (KED)  | 1.890 ppb             | 43,622 cps        | 2.3 %         |
| 64Zn (KED)  | 52.217 ppb            | 362,154 cps       | 1.5 %         |
| 69Ga (KED)  | 0.378 ppb             | 2,911 cps         | 3.7 %         |
| 75As (KED)  | 0.046 ppb             | 109 cps           | 17.7 %        |
| 80Se (KED)  | 0.106 ppb             | 1,316 cps         | 2.4 %         |
| 85Rb (KED)  | 0.617 ppb             | 4,230 cps         | 1.9 %         |
| 88Sr (KED)  | 2.507 ppb             | 24,262 cps        | 1.1 %         |
| 89Y (KED)   | 132.665 %             | 487,351 cps       | 0.9 %         |
| 107Ag (KED) | 0.022 ppb             | 1,365 cps         | 3.9 %         |
| 114Cd (KED) | 0.009 ppb             | 263 cps           | 4.6 %         |
| 115In (KED) | 128.920 %             | 896,793 cps       | 1.3 %         |
| 133Cs (KED) | 0.013 ppb             | 464 cps           | 0.4 %         |
| 138Ba (KED) | 1.256 ppb             | 61,373 cps        | 1.8 %         |
| 139La (KED) | 0.053 ppb             | 5,500 cps         | 0.5 %         |
| 140Ce (KED) | 0.118 ppb             | 16,427 cps        | 1.7 %         |
| 141Pr (KED) | 0.012 ppb             | 1,801 cps         | 8.2 %         |
| 142Nd (KED) | 0.074 ppb             | 4,294 cps         | 2.5 %         |
| 152Sm (KED) | 0.010 ppb             | 546 cps           | 5.1 %         |
| 153Eu (KED) | 0.002 ppb             | 231 cps           | 5.8 %         |
| 158Gd (KED) | 0.008 ppb             | 600 cps           | 13.1 %        |
| 159Tb (KED) | 135.937 %             | 4,844,526 cps     | 2.0 %         |
| 164Dy (KED) | 0.006 ppb             | 521 cps           | 5.8 %         |
| 166Er (KED) | 0.000 ppb             | 603 cps           | 5.6 %         |
| 169Tm (KED) | 0.000 ppb             | 160 cps           | 15.0 %        |
| 174Yb (KED) | 0.003 ppb             | 318 cps           | 9.5 %         |
| 175Lu (KED) | -0.101 ppb            | 20,028 cps        | 4.9 %         |
| 205Tl (KED) | 0.002 ppb             | 510 cps           | 6.4 %         |
| 208Pb (KED) | 0.287 ppb             | 47,346 cps        | 1.5 %         |
| 209Bi (KED) | 122.378 %             | 3,901,089 cps     | 0.2 %         |
| 232Th (KED) | 0.017 ppb             | 4,763 cps         | 2.6 %         |
| 238U (KED)  | 0.004 ppb             | 1,558 cps         | 8.5 %         |

## Sample Summary

Instrument ID: iCAP Q

Analysis index: 12

Analysis name: w100ti

Analysis started at: 10/20/2021 4:21:57 PM

User name: WINDOWS-UPCI4ER\Administrator

| Category    | Concentration average | Concentration RSD |
|-------------|-----------------------|-------------------|
| 6Li (KED)   | 138.845 %             | 3.6 %             |
| 9Be (KED)   | -0.007 ppb            | 0.0 %             |
| 11B (KED)   | 19.515 ppb            | 2.6 %             |
| 24Mg (KED)  | 110.089 ppb           | 3.3 %             |
| 27Al (KED)  | 80.021 ppb            | 2.3 %             |
| 45Sc (KED)  | 142.884 %             | 1.7 %             |
| 51V (KED)   | 0.143 ppb             | 10.4 %            |
| 52Cr (KED)  | 0.508 ppb             | 4.0 %             |
| 55Mn (KED)  | 2.775 ppb             | 3.8 %             |
| 56Fe (KED)  | 94.499 ppb            | 0.8 %             |
| 58Ni (KED)  | 0.607 ppb             | 1.7 %             |
| 59Co (KED)  | 0.046 ppb             | 2.8 %             |
| 63Cu (KED)  | 1.630 ppb             | 0.9 %             |
| 64Zn (KED)  | 50.964 ppb            | 0.9 %             |
| 69Ga (KED)  | 0.425 ppb             | 6.2 %             |
| 75As (KED)  | 0.075 ppb             | 7.6 %             |
| 80Se (KED)  | 0.045 ppb             | 324.8 %           |
| 85Rb (KED)  | 0.639 ppb             | 3.6 %             |
| 88Sr (KED)  | 1.672 ppb             | 1.4 %             |
| 89Y (KED)   | 138.195 %             | 1.6 %             |
| 107Ag (KED) | 0.025 ppb             | 2.0 %             |
| 114Cd (KED) | 0.008 ppb             | 10.4 %            |
| 115In (KED) | 131.865 %             | 2.3 %             |
| 133Cs (KED) | 0.015 ppb             | 3.4 %             |
| 138Ba (KED) | 1.405 ppb             | 1.7 %             |
| 139La (KED) | 0.080 ppb             | 2.3 %             |
| 140Ce (KED) | 0.178 ppb             | 1.4 %             |
| 141Pr (KED) | 0.020 ppb             | 7.5 %             |
| 142Nd (KED) | 0.109 ppb             | 1.7 %             |
| 152Sm (KED) | 0.014 ppb             | 4.3 %             |
| 153Eu (KED) | 0.003 ppb             | 6.4 %             |
| 158Gd (KED) | 0.013 ppb             | 3.5 %             |
| 159Tb (KED) | 141.239 %             | 2.3 %             |
| 164Dy (KED) | 0.009 ppb             | 10.9 %            |
| 166Er (KED) | 0.002 ppb             | 56.1 %            |
| 169Tm (KED) | 0.001 ppb             | 16.5 %            |
| 174Yb (KED) | 0.003 ppb             | 6.9 %             |
| 175Lu (KED) | -0.104 ppb            | 2.1 %             |
| 205Tl (KED) | 0.002 ppb             | 5.1 %             |
| 208Pb (KED) | 0.325 ppb             | 2.0 %             |
| 209Bi (KED) | 125.289 %             | 1.5 %             |
| 232Th (KED) | 0.019 ppb             | 1.5 %             |
| 238U (KED)  | 0.005 ppb             | 1.7 %             |

| Category   | Concentration average | Intensity average | Intensity RSD |
|------------|-----------------------|-------------------|---------------|
| 6Li (KED)  | 138.845 %             | 3,678 cps         | 3.6 %         |
| 9Be (KED)  | -0.007 ppb            | 0 cps             |               |
| 11B (KED)  | 19.515 ppb            | 2,564 cps         | 1.4 %         |
| 24Mg (KED) | 110.089 ppb           | 74,763 cps        | 2.5 %         |
| 27Al (KED) | 80.021 ppb            | 13,561 cps        | 3.7 %         |

# Comprehensive

10/20/2021 6:11:31 PM

| Category    | Concentration average | Intensity average | Intensity RSD |
|-------------|-----------------------|-------------------|---------------|
| 45Sc (KED)  | 142.884 %             | 56,456 cps        | 1.7 %         |
| 51V (KED)   | 0.143 ppb             | 1,428 cps         | 9.8 %         |
| 52Cr (KED)  | 0.508 ppb             | 8,041 cps         | 5.7 %         |
| 55Mn (KED)  | 2.775 ppb             | 22,409 cps        | 2.0 %         |
| 56Fe (KED)  | 94.499 ppb            | 1,376,930 cps     | 2.5 %         |
| 58Ni (KED)  | 0.607 ppb             | 12,059 cps        | 0.6 %         |
| 59Co (KED)  | 0.046 ppb             | 1,493 cps         | 4.0 %         |
| 63Cu (KED)  | 1.630 ppb             | 39,302 cps        | 1.5 %         |
| 64Zn (KED)  | 50.964 ppb            | 368,210 cps       | 1.0 %         |
| 69Ga (KED)  | 0.425 ppb             | 3,398 cps         | 5.7 %         |
| 75As (KED)  | 0.075 ppb             | 170 cps           | 7.8 %         |
| 80Se (KED)  | 0.045 ppb             | 1,328 cps         | 5.9 %         |
| 85Rb (KED)  | 0.639 ppb             | 4,560 cps         | 3.9 %         |
| 88Sr (KED)  | 1.672 ppb             | 16,936 cps        | 1.4 %         |
| 89Y (KED)   | 138.195 %             | 507,666 cps       | 1.6 %         |
| 107Ag (KED) | 0.025 ppb             | 1,557 cps         | 0.4 %         |
| 114Cd (KED) | 0.008 ppb             | 250 cps           | 8.0 %         |
| 115In (KED) | 131.865 %             | 917,277 cps       | 2.3 %         |
| 133Cs (KED) | 0.015 ppb             | 528 cps           | 3.7 %         |
| 138Ba (KED) | 1.405 ppb             | 71,109 cps        | 1.8 %         |
| 139La (KED) | 0.080 ppb             | 8,643 cps         | 1.5 %         |
| 140Ce (KED) | 0.178 ppb             | 25,655 cps        | 0.9 %         |
| 141Pr (KED) | 0.020 ppb             | 2,973 cps         | 7.0 %         |
| 142Nd (KED) | 0.109 ppb             | 6,595 cps         | 3.6 %         |
| 152Sm (KED) | 0.014 ppb             | 781 cps           | 2.1 %         |
| 153Eu (KED) | 0.003 ppb             | 354 cps           | 6.8 %         |
| 158Gd (KED) | 0.013 ppb             | 927 cps           | 4.4 %         |
| 159Tb (KED) | 141.239 %             | 5,033,494 cps     | 2.3 %         |
| 164Dy (KED) | 0.009 ppb             | 729 cps           | 12.9 %        |
| 166Er (KED) | 0.002 ppb             | 797 cps           | 11.3 %        |
| 169Tm (KED) | 0.001 ppb             | 180 cps           | 18.2 %        |
| 174Yb (KED) | 0.003 ppb             | 408 cps           | 7.3 %         |
| 175Lu (KED) | -0.104 ppb            | 20,179 cps        | 3.4 %         |
| 205Tl (KED) | 0.002 ppb             | 472 cps           | 5.7 %         |
| 208Pb (KED) | 0.325 ppb             | 54,169 cps        | 1.9 %         |
| 209Bi (KED) | 125.289 %             | 3,993,867 cps     | 1.5 %         |
| 232Th (KED) | 0.019 ppb             | 5,471 cps         | 1.1 %         |
| 238U (KED)  | 0.005 ppb             | 1,880 cps         | 2.0 %         |

## Sample Summary

Instrument ID: iCAP Q

Analysis index: 13

Analysis name: 29690ti

Analysis started at: 10/20/2021 4:26:09 PM

User name: WINDOWS-UPCI4ER\Administrator

| Category    | Concentration average | Concentration RSD |
|-------------|-----------------------|-------------------|
| 6Li (KED)   | 126.637 %             | 3.8 %             |
| 9Be (KED)   | 0.011 ppb             | 158.0 %           |
| 11B (KED)   | 4.458 ppb             | 25.3 %            |
| 24Mg (KED)  | 132.932 ppb           | 3.9 %             |
| 27Al (KED)  | 135.359 ppb           | 1.2 %             |
| 45Sc (KED)  | 134.696 %             | 2.5 %             |
| 51V (KED)   | 0.238 ppb             | 8.0 %             |
| 52Cr (KED)  | 0.528 ppb             | 0.7 %             |
| 55Mn (KED)  | 3.194 ppb             | 2.7 %             |
| 56Fe (KED)  | 134.915 ppb           | 3.4 %             |
| 58Ni (KED)  | 0.705 ppb             | 1.6 %             |
| 59Co (KED)  | 0.064 ppb             | 8.2 %             |
| 63Cu (KED)  | 2.114 ppb             | 2.1 %             |
| 64Zn (KED)  | 47.879 ppb            | 0.1 %             |
| 69Ga (KED)  | 0.566 ppb             | 4.3 %             |
| 75As (KED)  | 0.103 ppb             | 15.8 %            |
| 80Se (KED)  | 0.254 ppb             | 18.9 %            |
| 85Rb (KED)  | 0.561 ppb             | 2.5 %             |
| 88Sr (KED)  | 2.078 ppb             | 2.4 %             |
| 89Y (KED)   | 128.908 %             | 0.9 %             |
| 107Ag (KED) | 0.014 ppb             | 7.3 %             |
| 114Cd (KED) | 0.006 ppb             | 20.0 %            |
| 115In (KED) | 122.510 %             | 0.4 %             |
| 133Cs (KED) | 0.019 ppb             | 3.9 %             |
| 138Ba (KED) | 1.920 ppb             | 3.3 %             |
| 139La (KED) | 0.138 ppb             | 2.0 %             |
| 140Ce (KED) | 0.305 ppb             | 4.2 %             |
| 141Pr (KED) | 0.035 ppb             | 7.1 %             |
| 142Nd (KED) | 0.190 ppb             | 0.8 %             |
| 152Sm (KED) | 0.023 ppb             | 3.7 %             |
| 153Eu (KED) | 0.005 ppb             | 5.2 %             |
| 158Gd (KED) | 0.019 ppb             | 2.0 %             |
| 159Tb (KED) | 125.694 %             | 2.1 %             |
| 164Dy (KED) | 0.014 ppb             | 2.2 %             |
| 166Er (KED) | 0.004 ppb             | 24.1 %            |
| 169Tm (KED) | 0.001 ppb             | 21.4 %            |
| 174Yb (KED) | 0.005 ppb             | 9.7 %             |
| 175Lu (KED) | -0.100 ppb            | 2.5 %             |
| 205Tl (KED) | 0.003 ppb             | 5.6 %             |
| 208Pb (KED) | 0.325 ppb             | 1.0 %             |
| 209Bi (KED) | 116.360 %             | 1.6 %             |
| 232Th (KED) | 0.034 ppb             | 0.9 %             |
| 238U (KED)  | 0.009 ppb             | 1.7 %             |

| Category   | Concentration average | Intensity average | Intensity RSD |
|------------|-----------------------|-------------------|---------------|
| 6Li (KED)  | 126.637 %             | 3,355 cps         | 3.8 %         |
| 9Be (KED)  | 0.011 ppb             | 3 cps             | 100.0 %       |
| 11B (KED)  | 4.458 ppb             | 818 cps           | 10.5 %        |
| 24Mg (KED) | 132.932 ppb           | 82,286 cps        | 1.0 %         |
| 27Al (KED) | 135.359 ppb           | 21,544 cps        | 1.5 %         |

# Comprehensive

10/20/2021 6:11:31 PM

| Category    | Concentration average | Intensity average | Intensity RSD |
|-------------|-----------------------|-------------------|---------------|
| 45Sc (KED)  | 134.696 %             | 53,221 cps        | 2.5 %         |
| 51V (KED)   | 0.238 ppb             | 2,237 cps         | 5.6 %         |
| 52Cr (KED)  | 0.528 ppb             | 7,869 cps         | 1.9 %         |
| 55Mn (KED)  | 3.194 ppb             | 24,309 cps        | 0.5 %         |
| 56Fe (KED)  | 134.915 ppb           | 1,851,033 cps     | 1.0 %         |
| 58Ni (KED)  | 0.705 ppb             | 13,156 cps        | 2.4 %         |
| 59Co (KED)  | 0.064 ppb             | 1,935 cps         | 5.6 %         |
| 63Cu (KED)  | 2.114 ppb             | 47,310 cps        | 1.2 %         |
| 64Zn (KED)  | 47.879 ppb            | 322,765 cps       | 0.7 %         |
| 69Ga (KED)  | 0.566 ppb             | 4,190 cps         | 4.1 %         |
| 75As (KED)  | 0.103 ppb             | 211 cps           | 15.0 %        |
| 80Se (KED)  | 0.254 ppb             | 1,371 cps         | 2.3 %         |
| 85Rb (KED)  | 0.561 ppb             | 3,737 cps         | 3.0 %         |
| 88Sr (KED)  | 2.078 ppb             | 19,582 cps        | 2.4 %         |
| 89Y (KED)   | 128.908 %             | 473,548 cps       | 0.9 %         |
| 107Ag (KED) | 0.014 ppb             | 821 cps           | 7.3 %         |
| 114Cd (KED) | 0.006 ppb             | 193 cps           | 13.8 %        |
| 115In (KED) | 122.510 %             | 852,201 cps       | 0.4 %         |
| 133Cs (KED) | 0.019 ppb             | 623 cps           | 3.7 %         |
| 138Ba (KED) | 1.920 ppb             | 85,816 cps        | 1.2 %         |
| 139La (KED) | 0.138 ppb             | 13,174 cps        | 1.5 %         |
| 140Ce (KED) | 0.305 ppb             | 38,890 cps        | 2.2 %         |
| 141Pr (KED) | 0.035 ppb             | 4,701 cps         | 5.0 %         |
| 142Nd (KED) | 0.190 ppb             | 10,236 cps        | 1.4 %         |
| 152Sm (KED) | 0.023 ppb             | 1,123 cps         | 3.3 %         |
| 153Eu (KED) | 0.005 ppb             | 449 cps           | 5.6 %         |
| 158Gd (KED) | 0.019 ppb             | 1,270 cps         | 0.3 %         |
| 159Tb (KED) | 125.694 %             | 4,479,494 cps     | 2.1 %         |
| 164Dy (KED) | 0.014 ppb             | 1,048 cps         | 4.2 %         |
| 166Er (KED) | 0.004 ppb             | 920 cps           | 7.7 %         |
| 169Tm (KED) | 0.001 ppb             | 240 cps           | 20.7 %        |
| 174Yb (KED) | 0.005 ppb             | 601 cps           | 8.2 %         |
| 175Lu (KED) | -0.100 ppb            | 18,729 cps        | 1.2 %         |
| 205Tl (KED) | 0.003 ppb             | 547 cps           | 5.9 %         |
| 208Pb (KED) | 0.325 ppb             | 50,232 cps        | 1.4 %         |
| 209Bi (KED) | 116.360 %             | 3,709,254 cps     | 1.6 %         |
| 232Th (KED) | 0.034 ppb             | 9,176 cps         | 1.1 %         |
| 238U (KED)  | 0.009 ppb             | 2,988 cps         | 3.2 %         |

## Sample Summary

Instrument ID: iCAP Q

Analysis index: 14

Analysis name: 1805068ti

Analysis started at: 10/20/2021 4:30:13 PM

User name: WINDOWS-UPCI4ER\Administrator

| Category    | Concentration average | Concentration RSD |
|-------------|-----------------------|-------------------|
| 6Li (KED)   | 133.182 %             | 0.7 %             |
| 9Be (KED)   | 0.010 ppb             | 164.5 %           |
| 11B (KED)   | 5.105 ppb             | 16.8 %            |
| 24Mg (KED)  | 139.044 ppb           | 0.9 %             |
| 27Al (KED)  | 100.530 ppb           | 1.1 %             |
| 45Sc (KED)  | 136.707 %             | 0.1 %             |
| 51V (KED)   | 0.187 ppb             | 4.7 %             |
| 52Cr (KED)  | 0.468 ppb             | 2.2 %             |
| 55Mn (KED)  | 3.310 ppb             | 1.2 %             |
| 56Fe (KED)  | 122.900 ppb           | 0.2 %             |
| 58Ni (KED)  | 0.808 ppb             | 3.2 %             |
| 59Co (KED)  | 0.063 ppb             | 2.0 %             |
| 63Cu (KED)  | 2.219 ppb             | 0.2 %             |
| 64Zn (KED)  | 48.856 ppb            | 0.4 %             |
| 69Ga (KED)  | 0.556 ppb             | 4.0 %             |
| 75As (KED)  | 0.068 ppb             | 17.5 %            |
| 80Se (KED)  | 0.154 ppb             | 50.1 %            |
| 85Rb (KED)  | 0.950 ppb             | 2.1 %             |
| 88Sr (KED)  | 2.426 ppb             | 2.8 %             |
| 89Y (KED)   | 131.030 %             | 0.3 %             |
| 107Ag (KED) | 0.050 ppb             | 3.2 %             |
| 114Cd (KED) | 0.006 ppb             | 24.4 %            |
| 115In (KED) | 127.269 %             | 2.0 %             |
| 133Cs (KED) | 0.018 ppb             | 1.7 %             |
| 138Ba (KED) | 1.864 ppb             | 1.4 %             |
| 139La (KED) | 0.113 ppb             | 2.3 %             |
| 140Ce (KED) | 0.235 ppb             | 1.7 %             |
| 141Pr (KED) | 0.027 ppb             | 2.3 %             |
| 142Nd (KED) | 0.145 ppb             | 0.7 %             |
| 152Sm (KED) | 0.020 ppb             | 5.0 %             |
| 153Eu (KED) | 0.004 ppb             | 10.8 %            |
| 158Gd (KED) | 0.018 ppb             | 9.5 %             |
| 159Tb (KED) | 128.713 %             | 0.8 %             |
| 164Dy (KED) | 0.012 ppb             | 6.1 %             |
| 166Er (KED) | 0.003 ppb             | 18.0 %            |
| 169Tm (KED) | 0.001 ppb             | 4.6 %             |
| 174Yb (KED) | 0.005 ppb             | 2.4 %             |
| 175Lu (KED) | -0.102 ppb            | 2.1 %             |
| 205Tl (KED) | 0.002 ppb             | 6.4 %             |
| 208Pb (KED) | 0.286 ppb             | 2.8 %             |
| 209Bi (KED) | 118.246 %             | 1.3 %             |
| 232Th (KED) | 0.027 ppb             | 3.4 %             |
| 238U (KED)  | 0.007 ppb             | 4.8 %             |

| Category   | Concentration average | Intensity average | Intensity RSD |
|------------|-----------------------|-------------------|---------------|
| 6Li (KED)  | 133.182 %             | 3,528 cps         | 0.7 %         |
| 9Be (KED)  | 0.010 ppb             | 3 cps             | 100.0 %       |
| 11B (KED)  | 5.105 ppb             | 931 cps           | 9.1 %         |
| 24Mg (KED) | 139.044 ppb           | 90,594 cps        | 0.4 %         |
| 27Al (KED) | 100.530 ppb           | 16,270 cps        | 1.0 %         |

# Comprehensive

10/20/2021 6:11:31 PM

| Category    | Concentration average | Intensity average | Intensity RSD |
|-------------|-----------------------|-------------------|---------------|
| 45Sc (KED)  | 136.707 %             | 54,016 cps        | 0.1 %         |
| 51V (KED)   | 0.187 ppb             | 1,787 cps         | 4.7 %         |
| 52Cr (KED)  | 0.468 ppb             | 7,084 cps         | 2.3 %         |
| 55Mn (KED)  | 3.310 ppb             | 25,577 cps        | 1.3 %         |
| 56Fe (KED)  | 122.900 ppb           | 1,712,516 cps     | 0.3 %         |
| 58Ni (KED)  | 0.808 ppb             | 15,233 cps        | 3.2 %         |
| 59Co (KED)  | 0.063 ppb             | 1,939 cps         | 1.9 %         |
| 63Cu (KED)  | 2.219 ppb             | 50,420 cps        | 0.5 %         |
| 64Zn (KED)  | 48.856 ppb            | 334,752 cps       | 0.4 %         |
| 69Ga (KED)  | 0.556 ppb             | 4,190 cps         | 3.8 %         |
| 75As (KED)  | 0.068 ppb             | 149 cps           | 14.6 %        |
| 80Se (KED)  | 0.154 ppb             | 1,330 cps         | 4.0 %         |
| 85Rb (KED)  | 0.950 ppb             | 6,419 cps         | 1.9 %         |
| 88Sr (KED)  | 2.426 ppb             | 23,193 cps        | 2.5 %         |
| 89Y (KED)   | 131.030 %             | 481,343 cps       | 0.3 %         |
| 107Ag (KED) | 0.050 ppb             | 3,040 cps         | 2.3 %         |
| 114Cd (KED) | 0.006 ppb             | 189 cps           | 15.4 %        |
| 115In (KED) | 127.269 %             | 885,305 cps       | 2.0 %         |
| 133Cs (KED) | 0.018 ppb             | 628 cps           | 0.3 %         |
| 138Ba (KED) | 1.864 ppb             | 85,381 cps        | 0.6 %         |
| 139La (KED) | 0.113 ppb             | 11,072 cps        | 2.6 %         |
| 140Ce (KED) | 0.235 ppb             | 30,750 cps        | 1.0 %         |
| 141Pr (KED) | 0.027 ppb             | 3,699 cps         | 2.6 %         |
| 142Nd (KED) | 0.145 ppb             | 7,980 cps         | 0.7 %         |
| 152Sm (KED) | 0.020 ppb             | 982 cps           | 4.2 %         |
| 153Eu (KED) | 0.004 ppb             | 392 cps           | 10.3 %        |
| 158Gd (KED) | 0.018 ppb             | 1,205 cps         | 8.8 %         |
| 159Tb (KED) | 128.713 %             | 4,587,097 cps     | 0.8 %         |
| 164Dy (KED) | 0.012 ppb             | 907 cps           | 5.2 %         |
| 166Er (KED) | 0.003 ppb             | 812 cps           | 4.9 %         |
| 169Tm (KED) | 0.001 ppb             | 259 cps           | 5.2 %         |
| 174Yb (KED) | 0.005 ppb             | 550 cps           | 3.0 %         |
| 175Lu (KED) | -0.102 ppb            | 18,834 cps        | 2.6 %         |
| 205Tl (KED) | 0.002 ppb             | 438 cps           | 5.1 %         |
| 208Pb (KED) | 0.286 ppb             | 45,686 cps        | 1.8 %         |
| 209Bi (KED) | 118.246 %             | 3,769,367 cps     | 1.3 %         |
| 232Th (KED) | 0.027 ppb             | 7,343 cps         | 2.1 %         |
| 238U (KED)  | 0.007 ppb             | 2,254 cps         | 4.1 %         |

## Sample Summary

Instrument ID: iCAP Q

Analysis index: 15

Analysis name: 191128ti

Analysis started at: 10/20/2021 4:34:23 PM

User name: WINDOWS-UPCI4ER\Administrator

| Category    | Concentration average | Concentration RSD |
|-------------|-----------------------|-------------------|
| 6Li (KED)   | 135.699 %             | 1.1 %             |
| 9Be (KED)   | -0.001 ppb            | 905.4 %           |
| 11B (KED)   | 0.096 ppb             | 396.5 %           |
| 24Mg (KED)  | 156.527 ppb           | 0.9 %             |
| 27Al (KED)  | 139.736 ppb           | 2.1 %             |
| 45Sc (KED)  | 138.410 %             | 2.7 %             |
| 51V (KED)   | 0.270 ppb             | 7.8 %             |
| 52Cr (KED)  | 0.681 ppb             | 1.9 %             |
| 55Mn (KED)  | 4.244 ppb             | 0.1 %             |
| 56Fe (KED)  | 155.594 ppb           | 2.4 %             |
| 58Ni (KED)  | 0.803 ppb             | 3.4 %             |
| 59Co (KED)  | 0.083 ppb             | 4.5 %             |
| 63Cu (KED)  | 2.036 ppb             | 0.4 %             |
| 64Zn (KED)  | 47.819 ppb            | 1.0 %             |
| 69Ga (KED)  | 0.661 ppb             | 5.7 %             |
| 75As (KED)  | 0.117 ppb             | 5.8 %             |
| 80Se (KED)  | 0.206 ppb             | 75.2 %            |
| 85Rb (KED)  | 1.331 ppb             | 2.0 %             |
| 88Sr (KED)  | 2.582 ppb             | 0.8 %             |
| 89Y (KED)   | 131.426 %             | 1.2 %             |
| 107Ag (KED) | 0.022 ppb             | 3.1 %             |
| 114Cd (KED) | 0.008 ppb             | 14.3 %            |
| 115In (KED) | 125.903 %             | 1.1 %             |
| 133Cs (KED) | 0.025 ppb             | 7.0 %             |
| 138Ba (KED) | 2.288 ppb             | 2.6 %             |
| 139La (KED) | 0.172 ppb             | 2.4 %             |
| 140Ce (KED) | 0.348 ppb             | 2.8 %             |
| 141Pr (KED) | 0.042 ppb             | 1.1 %             |
| 142Nd (KED) | 0.216 ppb             | 3.5 %             |
| 152Sm (KED) | 0.028 ppb             | 4.9 %             |
| 153Eu (KED) | 0.005 ppb             | 3.2 %             |
| 158Gd (KED) | 0.024 ppb             | 5.7 %             |
| 159Tb (KED) | 128.201 %             | 1.6 %             |
| 164Dy (KED) | 0.016 ppb             | 3.1 %             |
| 166Er (KED) | 0.005 ppb             | 11.1 %            |
| 169Tm (KED) | 0.001 ppb             | 1.7 %             |
| 174Yb (KED) | 0.006 ppb             | 9.1 %             |
| 175Lu (KED) | -0.102 ppb            | 1.2 %             |
| 205Tl (KED) | 0.003 ppb             | 13.1 %            |
| 208Pb (KED) | 0.339 ppb             | 1.8 %             |
| 209Bi (KED) | 117.334 %             | 0.7 %             |
| 232Th (KED) | 0.036 ppb             | 3.1 %             |
| 238U (KED)  | 0.009 ppb             | 4.3 %             |

| Category   | Concentration average | Intensity average | Intensity RSD |
|------------|-----------------------|-------------------|---------------|
| 6Li (KED)  | 135.699 %             | 3,595 cps         | 1.1 %         |
| 9Be (KED)  | -0.001 ppb            | 1 cps             | 173.2 %       |
| 11B (KED)  | 0.096 ppb             | 408 cps           | 10.4 %        |
| 24Mg (KED) | 156.527 ppb           | 103,897 cps       | 0.6 %         |
| 27Al (KED) | 139.736 ppb           | 22,846 cps        | 0.8 %         |

# Comprehensive

10/20/2021 6:11:31 PM

| Category    | Concentration average | Intensity average | Intensity RSD |
|-------------|-----------------------|-------------------|---------------|
| 45Sc (KED)  | 138.410 %             | 54,688 cps        | 2.7 %         |
| 51V (KED)   | 0.270 ppb             | 2,606 cps         | 6.1 %         |
| 52Cr (KED)  | 0.681 ppb             | 10,399 cps        | 2.3 %         |
| 55Mn (KED)  | 4.244 ppb             | 33,192 cps        | 2.8 %         |
| 56Fe (KED)  | 155.594 ppb           | 2,193,539 cps     | 0.3 %         |
| 58Ni (KED)  | 0.803 ppb             | 15,328 cps        | 0.8 %         |
| 59Co (KED)  | 0.083 ppb             | 2,550 cps         | 1.8 %         |
| 63Cu (KED)  | 2.036 ppb             | 46,483 cps        | 1.6 %         |
| 64Zn (KED)  | 47.819 ppb            | 328,637 cps       | 0.3 %         |
| 69Ga (KED)  | 0.661 ppb             | 4,975 cps         | 4.6 %         |
| 75As (KED)  | 0.117 ppb             | 241 cps           | 4.2 %         |
| 80Se (KED)  | 0.206 ppb             | 1,367 cps         | 6.5 %         |
| 85Rb (KED)  | 1.331 ppb             | 9,017 cps         | 2.7 %         |
| 88Sr (KED)  | 2.582 ppb             | 24,750 cps        | 1.0 %         |
| 89Y (KED)   | 131.426 %             | 482,799 cps       | 1.2 %         |
| 107Ag (KED) | 0.022 ppb             | 1,313 cps         | 4.0 %         |
| 114Cd (KED) | 0.008 ppb             | 247 cps           | 12.0 %        |
| 115In (KED) | 125.903 %             | 875,802 cps       | 1.1 %         |
| 133Cs (KED) | 0.025 ppb             | 824 cps           | 5.7 %         |
| 138Ba (KED) | 2.288 ppb             | 104,001 cps       | 2.6 %         |
| 139La (KED) | 0.172 ppb             | 16,782 cps        | 1.1 %         |
| 140Ce (KED) | 0.348 ppb             | 45,253 cps        | 1.7 %         |
| 141Pr (KED) | 0.042 ppb             | 5,696 cps         | 1.3 %         |
| 142Nd (KED) | 0.216 ppb             | 11,875 cps        | 3.5 %         |
| 152Sm (KED) | 0.028 ppb             | 1,382 cps         | 4.1 %         |
| 153Eu (KED) | 0.005 ppb             | 512 cps           | 3.1 %         |
| 158Gd (KED) | 0.024 ppb             | 1,576 cps         | 5.0 %         |
| 159Tb (KED) | 128.201 %             | 4,568,830 cps     | 1.6 %         |
| 164Dy (KED) | 0.016 ppb             | 1,236 cps         | 2.6 %         |
| 166Er (KED) | 0.005 ppb             | 961 cps           | 3.1 %         |
| 169Tm (KED) | 0.001 ppb             | 351 cps           | 2.9 %         |
| 174Yb (KED) | 0.006 ppb             | 644 cps           | 9.9 %         |
| 175Lu (KED) | -0.102 ppb            | 18,822 cps        | 2.7 %         |
| 205Tl (KED) | 0.003 ppb             | 570 cps           | 13.2 %        |
| 208Pb (KED) | 0.339 ppb             | 52,635 cps        | 1.3 %         |
| 209Bi (KED) | 117.334 %             | 3,740,310 cps     | 0.7 %         |
| 232Th (KED) | 0.036 ppb             | 9,809 cps         | 3.6 %         |
| 238U (KED)  | 0.009 ppb             | 3,049 cps         | 4.0 %         |

## Sample Summary

Instrument ID: iCAP Q

Analysis index: 16

Analysis name: 19196ti

Analysis started at: 10/20/2021 4:38:29 PM

User name: WINDOWS-UPCI4ER\Administrator

| Category    | Concentration average | Concentration RSD |
|-------------|-----------------------|-------------------|
| 6Li (KED)   | 143.167 %             | 2.3 %             |
| 9Be (KED)   | -0.007 ppb            | 0.0 %             |
| 11B (KED)   | 4.987 ppb             | 15.8 %            |
| 24Mg (KED)  | 120.832 ppb           | 2.6 %             |
| 27Al (KED)  | 85.471 ppb            | 2.4 %             |
| 45Sc (KED)  | 147.517 %             | 0.8 %             |
| 51V (KED)   | 0.153 ppb             | 5.4 %             |
| 52Cr (KED)  | 0.512 ppb             | 2.4 %             |
| 55Mn (KED)  | 2.997 ppb             | 0.9 %             |
| 56Fe (KED)  | 101.885 ppb           | 1.3 %             |
| 58Ni (KED)  | 58.723 ppb            | 1.5 %             |
| 59Co (KED)  | 0.055 ppb             | 2.6 %             |
| 63Cu (KED)  | 2.349 ppb             | 0.9 %             |
| 64Zn (KED)  | 42.805 ppb            | 1.4 %             |
| 69Ga (KED)  | 0.460 ppb             | 5.1 %             |
| 75As (KED)  | 0.076 ppb             | 7.1 %             |
| 80Se (KED)  | 0.043 ppb             | 432.0 %           |
| 85Rb (KED)  | 0.491 ppb             | 3.2 %             |
| 88Sr (KED)  | 2.010 ppb             | 1.8 %             |
| 89Y (KED)   | 140.353 %             | 1.9 %             |
| 107Ag (KED) | 0.011 ppb             | 10.8 %            |
| 114Cd (KED) | 0.005 ppb             | 46.3 %            |
| 115In (KED) | 133.118 %             | 2.2 %             |
| 133Cs (KED) | 0.016 ppb             | 11.2 %            |
| 138Ba (KED) | 1.545 ppb             | 5.1 %             |
| 139La (KED) | 0.093 ppb             | 2.5 %             |
| 140Ce (KED) | 0.206 ppb             | 1.5 %             |
| 141Pr (KED) | 0.023 ppb             | 4.5 %             |
| 142Nd (KED) | 0.127 ppb             | 4.3 %             |
| 152Sm (KED) | 0.017 ppb             | 2.8 %             |
| 153Eu (KED) | 0.003 ppb             | 15.5 %            |
| 158Gd (KED) | 0.013 ppb             | 7.7 %             |
| 159Tb (KED) | 138.895 %             | 1.7 %             |
| 164Dy (KED) | 0.010 ppb             | 7.2 %             |
| 166Er (KED) | 0.002 ppb             | 7.0 %             |
| 169Tm (KED) | 0.001 ppb             | 1.7 %             |
| 174Yb (KED) | 0.004 ppb             | 5.4 %             |
| 175Lu (KED) | -0.106 ppb            | 2.7 %             |
| 205Tl (KED) | 0.002 ppb             | 7.6 %             |
| 208Pb (KED) | 0.343 ppb             | 6.8 %             |
| 209Bi (KED) | 124.271 %             | 0.5 %             |
| 232Th (KED) | 0.021 ppb             | 6.5 %             |
| 238U (KED)  | 0.005 ppb             | 0.7 %             |

| Category   | Concentration average | Intensity average | Intensity RSD |
|------------|-----------------------|-------------------|---------------|
| 6Li (KED)  | 143.167 %             | 3,793 cps         | 2.3 %         |
| 9Be (KED)  | -0.007 ppb            | 0 cps             |               |
| 11B (KED)  | 4.987 ppb             | 987 cps           | 7.0 %         |
| 24Mg (KED) | 120.832 ppb           | 84,619 cps        | 1.0 %         |
| 27Al (KED) | 85.471 ppb            | 14,945 cps        | 2.9 %         |

# Comprehensive

10/20/2021 6:11:31 PM

| Category    | Concentration average | Intensity average | Intensity RSD |
|-------------|-----------------------|-------------------|---------------|
| 45Sc (KED)  | 147.517 %             | 58,287 cps        | 0.8 %         |
| 51V (KED)   | 0.153 ppb             | 1,582 cps         | 5.8 %         |
| 52Cr (KED)  | 0.512 ppb             | 8,361 cps         | 3.1 %         |
| 55Mn (KED)  | 2.997 ppb             | 24,997 cps        | 1.6 %         |
| 56Fe (KED)  | 101.885 ppb           | 1,532,460 cps     | 2.1 %         |
| 58Ni (KED)  | 58.723 ppb            | 1,164,481 cps     | 2.3 %         |
| 59Co (KED)  | 0.055 ppb             | 1,830 cps         | 2.1 %         |
| 63Cu (KED)  | 2.349 ppb             | 57,126 cps        | 2.3 %         |
| 64Zn (KED)  | 42.805 ppb            | 314,258 cps       | 1.2 %         |
| 69Ga (KED)  | 0.460 ppb             | 3,728 cps         | 3.4 %         |
| 75As (KED)  | 0.076 ppb             | 176 cps           | 7.9 %         |
| 80Se (KED)  | 0.043 ppb             | 1,350 cps         | 11.2 %        |
| 85Rb (KED)  | 0.491 ppb             | 3,562 cps         | 2.5 %         |
| 88Sr (KED)  | 2.010 ppb             | 20,627 cps        | 3.3 %         |
| 89Y (KED)   | 140.353 %             | 515,591 cps       | 1.9 %         |
| 107Ag (KED) | 0.011 ppb             | 706 cps           | 8.3 %         |
| 114Cd (KED) | 0.005 ppb             | 180 cps           | 29.1 %        |
| 115In (KED) | 133.118 %             | 925,990 cps       | 2.2 %         |
| 133Cs (KED) | 0.016 ppb             | 557 cps           | 10.6 %        |
| 138Ba (KED) | 1.545 ppb             | 76,737 cps        | 6.7 %         |
| 139La (KED) | 0.093 ppb             | 9,858 cps         | 4.2 %         |
| 140Ce (KED) | 0.206 ppb             | 29,088 cps        | 1.4 %         |
| 141Pr (KED) | 0.023 ppb             | 3,493 cps         | 6.1 %         |
| 142Nd (KED) | 0.127 ppb             | 7,581 cps         | 3.2 %         |
| 152Sm (KED) | 0.017 ppb             | 886 cps           | 4.4 %         |
| 153Eu (KED) | 0.003 ppb             | 367 cps           | 16.5 %        |
| 158Gd (KED) | 0.013 ppb             | 944 cps           | 9.3 %         |
| 159Tb (KED) | 138.895 %             | 4,949,942 cps     | 1.7 %         |
| 164Dy (KED) | 0.010 ppb             | 800 cps           | 8.4 %         |
| 166Er (KED) | 0.002 ppb             | 767 cps           | 3.0 %         |
| 169Tm (KED) | 0.001 ppb             | 199 cps           | 2.6 %         |
| 174Yb (KED) | 0.004 ppb             | 479 cps           | 6.2 %         |
| 175Lu (KED) | -0.106 ppb            | 19,495 cps        | 4.3 %         |
| 205Tl (KED) | 0.002 ppb             | 418 cps           | 7.7 %         |
| 208Pb (KED) | 0.343 ppb             | 56,277 cps        | 5.6 %         |
| 209Bi (KED) | 124.271 %             | 3,961,443 cps     | 0.5 %         |
| 232Th (KED) | 0.021 ppb             | 6,069 cps         | 6.0 %         |
| 238U (KED)  | 0.005 ppb             | 1,888 cps         | 0.2 %         |

# Comprehensive

10/20/2021 6:11:31 PM

## Sample Summary

Instrument ID: iCAP Q

Analysis index: 17

Analysis name: 191117ti

Analysis started at: 10/20/2021 4:42:45 PM

User name: WINDOWS-UPCI4ER\Administrator

| Category    | Concentration average | Concentration RSD |
|-------------|-----------------------|-------------------|
| 6Li (KED)   | 129.406 %             | 5.6 %             |
| 9Be (KED)   | 0.011 ppb             | 9.1 %             |
| 11B (KED)   | 20.208 ppb            | 5.2 %             |
| 24Mg (KED)  | 159.497 ppb           | 1.8 %             |
| 27Al (KED)  | 139.619 ppb           | 1.1 %             |
| 45Sc (KED)  | 135.984 %             | 1.3 %             |
| 51V (KED)   | 0.243 ppb             | 3.8 %             |
| 52Cr (KED)  | 0.536 ppb             | 3.5 %             |
| 55Mn (KED)  | 4.301 ppb             | 2.8 %             |
| 56Fe (KED)  | 146.001 ppb           | 0.7 %             |
| 58Ni (KED)  | 1.000 ppb             | 0.8 %             |
| 59Co (KED)  | 0.072 ppb             | 1.9 %             |
| 63Cu (KED)  | 1.589 ppb             | 0.8 %             |
| 64Zn (KED)  | 52.164 ppb            | 2.6 %             |
| 69Ga (KED)  | 0.657 ppb             | 1.1 %             |
| 75As (KED)  | 0.104 ppb             | 14.9 %            |
| 80Se (KED)  | 0.167 ppb             | 59.2 %            |
| 85Rb (KED)  | 0.868 ppb             | 2.1 %             |
| 88Sr (KED)  | 2.354 ppb             | 2.7 %             |
| 89Y (KED)   | 129.232 %             | 1.8 %             |
| 107Ag (KED) | 0.015 ppb             | 6.0 %             |
| 114Cd (KED) | 0.008 ppb             | 12.2 %            |
| 115In (KED) | 124.469 %             | 1.4 %             |
| 133Cs (KED) | 0.024 ppb             | 2.3 %             |
| 138Ba (KED) | 2.306 ppb             | 1.0 %             |
| 139La (KED) | 0.132 ppb             | 2.1 %             |
| 140Ce (KED) | 0.296 ppb             | 1.8 %             |
| 141Pr (KED) | 0.033 ppb             | 1.9 %             |
| 142Nd (KED) | 0.180 ppb             | 1.6 %             |
| 152Sm (KED) | 0.025 ppb             | 12.7 %            |
| 153Eu (KED) | 0.005 ppb             | 1.8 %             |
| 158Gd (KED) | 0.021 ppb             | 9.8 %             |
| 159Tb (KED) | 125.787 %             | 0.3 %             |
| 164Dy (KED) | 0.015 ppb             | 4.4 %             |
| 166Er (KED) | 0.004 ppb             | 25.1 %            |
| 169Tm (KED) | 0.001 ppb             | 7.4 %             |
| 174Yb (KED) | 0.006 ppb             | 3.2 %             |
| 175Lu (KED) | -0.102 ppb            | 3.9 %             |
| 205Tl (KED) | 0.003 ppb             | 8.6 %             |
| 208Pb (KED) | 0.329 ppb             | 1.7 %             |
| 209Bi (KED) | 116.663 %             | 1.6 %             |
| 232Th (KED) | 0.035 ppb             | 2.4 %             |
| 238U (KED)  | 0.007 ppb             | 3.1 %             |

| Category   | Concentration average | Intensity average | Intensity RSD |
|------------|-----------------------|-------------------|---------------|
| 6Li (KED)  | 129.406 %             | 3,428 cps         | 5.6 %         |
| 9Be (KED)  | 0.011 ppb             | 3 cps             | 0.0 %         |
| 11B (KED)  | 20.208 ppb            | 2,458 cps         | 1.5 %         |
| 24Mg (KED) | 159.497 ppb           | 100,917 cps       | 4.6 %         |
| 27Al (KED) | 139.619 ppb           | 22,436 cps        | 1.8 %         |

# Comprehensive

10/20/2021 6:11:31 PM

| Category    | Concentration average | Intensity average | Intensity RSD |
|-------------|-----------------------|-------------------|---------------|
| 45Sc (KED)  | 135.984 %             | 53,730 cps        | 1.3 %         |
| 51V (KED)   | 0.243 ppb             | 2,311 cps         | 4.4 %         |
| 52Cr (KED)  | 0.536 ppb             | 8,058 cps         | 4.2 %         |
| 55Mn (KED)  | 4.301 ppb             | 33,043 cps        | 2.7 %         |
| 56Fe (KED)  | 146.001 ppb           | 2,023,304 cps     | 1.8 %         |
| 58Ni (KED)  | 1.000 ppb             | 18,670 cps        | 1.3 %         |
| 59Co (KED)  | 0.072 ppb             | 2,204 cps         | 3.2 %         |
| 63Cu (KED)  | 1.589 ppb             | 35,850 cps        | 1.5 %         |
| 64Zn (KED)  | 52.164 ppb            | 352,341 cps       | 1.2 %         |
| 69Ga (KED)  | 0.657 ppb             | 4,867 cps         | 2.1 %         |
| 75As (KED)  | 0.104 ppb             | 212 cps           | 11.8 %        |
| 80Se (KED)  | 0.167 ppb             | 1,320 cps         | 6.1 %         |
| 85Rb (KED)  | 0.868 ppb             | 5,789 cps         | 2.4 %         |
| 88Sr (KED)  | 2.354 ppb             | 22,202 cps        | 3.1 %         |
| 89Y (KED)   | 129.232 %             | 474,738 cps       | 1.8 %         |
| 107Ag (KED) | 0.015 ppb             | 879 cps           | 6.5 %         |
| 114Cd (KED) | 0.008 ppb             | 232 cps           | 7.9 %         |
| 115In (KED) | 124.469 %             | 865,825 cps       | 1.4 %         |
| 133Cs (KED) | 0.024 ppb             | 781 cps           | 0.9 %         |
| 138Ba (KED) | 2.306 ppb             | 102,813 cps       | 1.1 %         |
| 139La (KED) | 0.132 ppb             | 12,664 cps        | 1.9 %         |
| 140Ce (KED) | 0.296 ppb             | 37,875 cps        | 1.8 %         |
| 141Pr (KED) | 0.033 ppb             | 4,471 cps         | 2.1 %         |
| 142Nd (KED) | 0.180 ppb             | 9,690 cps         | 1.6 %         |
| 152Sm (KED) | 0.025 ppb             | 1,207 cps         | 12.4 %        |
| 153Eu (KED) | 0.005 ppb             | 486 cps           | 2.1 %         |
| 158Gd (KED) | 0.021 ppb             | 1,376 cps         | 9.8 %         |
| 159Tb (KED) | 125.787 %             | 4,482,796 cps     | 0.3 %         |
| 164Dy (KED) | 0.015 ppb             | 1,100 cps         | 4.1 %         |
| 166Er (KED) | 0.004 ppb             | 897 cps           | 9.9 %         |
| 169Tm (KED) | 0.001 ppb             | 279 cps           | 7.0 %         |
| 174Yb (KED) | 0.006 ppb             | 649 cps           | 3.3 %         |
| 175Lu (KED) | -0.102 ppb            | 18,318 cps        | 3.8 %         |
| 205Tl (KED) | 0.003 ppb             | 560 cps           | 8.0 %         |
| 208Pb (KED) | 0.329 ppb             | 50,916 cps        | 3.1 %         |
| 209Bi (KED) | 116.663 %             | 3,718,903 cps     | 1.6 %         |
| 232Th (KED) | 0.035 ppb             | 9,332 cps         | 1.3 %         |
| 238U (KED)  | 0.007 ppb             | 2,437 cps         | 3.2 %         |

# Comprehensive

10/20/2021 6:11:31 PM

## Sample Summary

Instrument ID: iCAP Q

Analysis index: 18

Analysis name: 1855y ti

Analysis started at: 10/20/2021 4:46:51 PM

User name: WINDOWS-UPCI4ER\Administrator

| Category    | Concentration average | Concentration RSD |
|-------------|-----------------------|-------------------|
| 6Li (KED)   | 120.806 %             | 3.2 %             |
| 9Be (KED)   | -0.001 ppb            | 1,800.3 %         |
| 11B (KED)   | 3.057 ppb             | 16.7 %            |
| 24Mg (KED)  | 110.725 ppb           | 2.0 %             |
| 27Al (KED)  | 111.409 ppb           | 1.1 %             |
| 45Sc (KED)  | 125.767 %             | 2.5 %             |
| 51V (KED)   | 0.197 ppb             | 2.4 %             |
| 52Cr (KED)  | 0.489 ppb             | 3.0 %             |
| 55Mn (KED)  | 3.407 ppb             | 0.4 %             |
| 56Fe (KED)  | 118.783 ppb           | 1.7 %             |
| 58Ni (KED)  | 0.732 ppb             | 2.0 %             |
| 59Co (KED)  | 0.060 ppb             | 4.6 %             |
| 63Cu (KED)  | 1.944 ppb             | 1.6 %             |
| 64Zn (KED)  | 59.101 ppb            | 1.7 %             |
| 69Ga (KED)  | 0.572 ppb             | 1.8 %             |
| 75As (KED)  | 0.098 ppb             | 3.9 %             |
| 80Se (KED)  | 0.542 ppb             | 7.9 %             |
| 85Rb (KED)  | 0.724 ppb             | 7.4 %             |
| 88Sr (KED)  | 1.739 ppb             | 1.2 %             |
| 89Y (KED)   | 120.691 %             | 1.2 %             |
| 107Ag (KED) | 0.008 ppb             | 9.3 %             |
| 114Cd (KED) | 0.008 ppb             | 29.4 %            |
| 115In (KED) | 114.432 %             | 1.0 %             |
| 133Cs (KED) | 0.020 ppb             | 9.5 %             |
| 138Ba (KED) | 1.967 ppb             | 2.9 %             |
| 139La (KED) | 0.107 ppb             | 3.6 %             |
| 140Ce (KED) | 0.298 ppb             | 2.2 %             |
| 141Pr (KED) | 0.026 ppb             | 0.6 %             |
| 142Nd (KED) | 0.165 ppb             | 3.0 %             |
| 152Sm (KED) | 0.021 ppb             | 4.0 %             |
| 153Eu (KED) | 0.004 ppb             | 3.9 %             |
| 158Gd (KED) | 0.018 ppb             | 6.5 %             |
| 159Tb (KED) | 112.943 %             | 0.6 %             |
| 164Dy (KED) | 0.013 ppb             | 6.6 %             |
| 166Er (KED) | 0.005 ppb             | 6.5 %             |
| 169Tm (KED) | 0.001 ppb             | 21.8 %            |
| 174Yb (KED) | 0.005 ppb             | 1.5 %             |
| 175Lu (KED) | -0.102 ppb            | 0.7 %             |
| 205Tl (KED) | 0.002 ppb             | 6.7 %             |
| 208Pb (KED) | 0.307 ppb             | 2.5 %             |
| 209Bi (KED) | 106.564 %             | 1.1 %             |
| 232Th (KED) | 0.025 ppb             | 2.9 %             |
| 238U (KED)  | 0.006 ppb             | 1.2 %             |

| Category   | Concentration average | Intensity average | Intensity RSD |
|------------|-----------------------|-------------------|---------------|
| 6Li (KED)  | 120.806 %             | 3,200 cps         | 3.2 %         |
| 9Be (KED)  | -0.001 ppb            | 1 cps             | 173.2 %       |
| 11B (KED)  | 3.057 ppb             | 649 cps           | 10.6 %        |
| 24Mg (KED) | 110.725 ppb           | 65,437 cps        | 1.4 %         |
| 27Al (KED) | 111.409 ppb           | 16,577 cps        | 2.6 %         |

# Comprehensive

10/20/2021 6:11:31 PM

| Category    | Concentration average | Intensity average | Intensity RSD |
|-------------|-----------------------|-------------------|---------------|
| 45Sc (KED)  | 125.767 %             | 49,693 cps        | 2.5 %         |
| 51V (KED)   | 0.197 ppb             | 1,730 cps         | 2.8 %         |
| 52Cr (KED)  | 0.489 ppb             | 6,813 cps         | 4.5 %         |
| 55Mn (KED)  | 3.407 ppb             | 24,220 cps        | 2.2 %         |
| 56Fe (KED)  | 118.783 ppb           | 1,522,534 cps     | 2.1 %         |
| 58Ni (KED)  | 0.732 ppb             | 12,739 cps        | 1.8 %         |
| 59Co (KED)  | 0.060 ppb             | 1,680 cps         | 2.2 %         |
| 63Cu (KED)  | 1.944 ppb             | 40,801 cps        | 1.9 %         |
| 64Zn (KED)  | 59.101 ppb            | 372,798 cps       | 2.2 %         |
| 69Ga (KED)  | 0.572 ppb             | 3,965 cps         | 1.1 %         |
| 75As (KED)  | 0.098 ppb             | 188 cps           | 4.5 %         |
| 80Se (KED)  | 0.542 ppb             | 1,453 cps         | 2.0 %         |
| 85Rb (KED)  | 0.724 ppb             | 4,510 cps         | 6.8 %         |
| 88Sr (KED)  | 1.739 ppb             | 15,375 cps        | 1.5 %         |
| 89Y (KED)   | 120.691 %             | 443,365 cps       | 1.2 %         |
| 107Ag (KED) | 0.008 ppb             | 474 cps           | 8.8 %         |
| 114Cd (KED) | 0.008 ppb             | 223 cps           | 23.3 %        |
| 115In (KED) | 114.432 %             | 796,006 cps       | 1.0 %         |
| 133Cs (KED) | 0.020 ppb             | 599 cps           | 9.4 %         |
| 138Ba (KED) | 1.967 ppb             | 78,975 cps        | 2.4 %         |
| 139La (KED) | 0.107 ppb             | 9,187 cps         | 3.7 %         |
| 140Ce (KED) | 0.298 ppb             | 34,141 cps        | 1.6 %         |
| 141Pr (KED) | 0.026 ppb             | 3,169 cps         | 1.2 %         |
| 142Nd (KED) | 0.165 ppb             | 8,005 cps         | 3.0 %         |
| 152Sm (KED) | 0.021 ppb             | 897 cps           | 4.4 %         |
| 153Eu (KED) | 0.004 ppb             | 370 cps           | 4.1 %         |
| 158Gd (KED) | 0.018 ppb             | 1,060 cps         | 6.6 %         |
| 159Tb (KED) | 112.943 %             | 4,025,081 cps     | 0.6 %         |
| 164Dy (KED) | 0.013 ppb             | 899 cps           | 5.9 %         |
| 166Er (KED) | 0.005 ppb             | 858 cps           | 3.3 %         |
| 169Tm (KED) | 0.001 ppb             | 206 cps           | 21.1 %        |
| 174Yb (KED) | 0.005 ppb             | 517 cps           | 1.7 %         |
| 175Lu (KED) | -0.102 ppb            | 16,560 cps        | 0.8 %         |
| 205Tl (KED) | 0.002 ppb             | 426 cps           | 6.8 %         |
| 208Pb (KED) | 0.307 ppb             | 43,786 cps        | 2.5 %         |
| 209Bi (KED) | 106.564 %             | 3,396,984 cps     | 1.1 %         |
| 232Th (KED) | 0.025 ppb             | 6,144 cps         | 3.9 %         |
| 238U (KED)  | 0.006 ppb             | 1,830 cps         | 1.6 %         |

# Comprehensive

10/20/2021 6:11:31 PM

## Sample Summary

Instrument ID: iCAP Q

Analysis index: 19

Analysis name: 29682ti

Analysis started at: 10/20/2021 4:50:55 PM

User name: WINDOWS-UPCI4ER\Administrator

| Category    | Concentration average | Concentration RSD |
|-------------|-----------------------|-------------------|
| 6Li (KED)   | 114.975 %             | 1.4 %             |
| 9Be (KED)   | 0.000 ppb             | 25,809.3 %        |
| 11B (KED)   | 28.996 ppb            | 1.1 %             |
| 24Mg (KED)  | 91.604 ppb            | 2.4 %             |
| 27Al (KED)  | 56.245 ppb            | 0.3 %             |
| 45Sc (KED)  | 123.599 %             | 1.6 %             |
| 51V (KED)   | 0.114 ppb             | 9.0 %             |
| 52Cr (KED)  | 0.387 ppb             | 5.0 %             |
| 55Mn (KED)  | 1.907 ppb             | 2.9 %             |
| 56Fe (KED)  | 67.544 ppb            | 1.0 %             |
| 58Ni (KED)  | 0.498 ppb             | 1.1 %             |
| 59Co (KED)  | 0.033 ppb             | 7.0 %             |
| 63Cu (KED)  | 1.645 ppb             | 1.7 %             |
| 64Zn (KED)  | 51.847 ppb            | 0.8 %             |
| 69Ga (KED)  | 0.371 ppb             | 9.4 %             |
| 75As (KED)  | 0.092 ppb             | 14.6 %            |
| 80Se (KED)  | 0.644 ppb             | 31.3 %            |
| 85Rb (KED)  | 0.756 ppb             | 1.7 %             |
| 88Sr (KED)  | 1.336 ppb             | 1.6 %             |
| 89Y (KED)   | 116.442 %             | 2.1 %             |
| 107Ag (KED) | 0.010 ppb             | 6.9 %             |
| 114Cd (KED) | 0.009 ppb             | 27.5 %            |
| 115In (KED) | 111.043 %             | 1.0 %             |
| 133Cs (KED) | 0.015 ppb             | 6.4 %             |
| 138Ba (KED) | 1.400 ppb             | 1.2 %             |
| 139La (KED) | 0.063 ppb             | 4.4 %             |
| 140Ce (KED) | 0.201 ppb             | 1.7 %             |
| 141Pr (KED) | 0.015 ppb             | 8.6 %             |
| 142Nd (KED) | 0.107 ppb             | 2.8 %             |
| 152Sm (KED) | 0.012 ppb             | 6.8 %             |
| 153Eu (KED) | 0.002 ppb             | 3.8 %             |
| 158Gd (KED) | 0.010 ppb             | 10.5 %            |
| 159Tb (KED) | 109.901 %             | 2.1 %             |
| 164Dy (KED) | 0.007 ppb             | 4.0 %             |
| 166Er (KED) | 0.002 ppb             | 19.3 %            |
| 169Tm (KED) | 0.000 ppb             | 33.8 %            |
| 174Yb (KED) | 0.002 ppb             | 15.9 %            |
| 175Lu (KED) | -0.106 ppb            | 2.5 %             |
| 205Tl (KED) | 0.002 ppb             | 15.0 %            |
| 208Pb (KED) | 0.241 ppb             | 0.1 %             |
| 209Bi (KED) | 103.537 %             | 1.5 %             |
| 232Th (KED) | 0.015 ppb             | 0.1 %             |
| 238U (KED)  | 0.005 ppb             | 4.2 %             |

| Category   | Concentration average | Intensity average | Intensity RSD |
|------------|-----------------------|-------------------|---------------|
| 6Li (KED)  | 114.975 %             | 3,046 cps         | 1.4 %         |
| 9Be (KED)  | 0.000 ppb             | 1 cps             | 173.2 %       |
| 11B (KED)  | 28.996 ppb            | 2,993 cps         | 2.3 %         |
| 24Mg (KED) | 91.604 ppb            | 51,553 cps        | 1.7 %         |
| 27Al (KED) | 56.245 ppb            | 8,272 cps         | 1.3 %         |

# Comprehensive

10/20/2021 6:11:31 PM

| Category    | Concentration average | Intensity average | Intensity RSD |
|-------------|-----------------------|-------------------|---------------|
| 45Sc (KED)  | 123.599 %             | 48,836 cps        | 1.6 %         |
| 51V (KED)   | 0.114 ppb             | 991 cps           | 10.4 %        |
| 52Cr (KED)  | 0.387 ppb             | 5,312 cps         | 5.6 %         |
| 55Mn (KED)  | 1.907 ppb             | 13,349 cps        | 4.2 %         |
| 56Fe (KED)  | 67.544 ppb            | 851,831 cps       | 1.7 %         |
| 58Ni (KED)  | 0.498 ppb             | 8,626 cps         | 0.6 %         |
| 59Co (KED)  | 0.033 ppb             | 924 cps           | 5.2 %         |
| 63Cu (KED)  | 1.645 ppb             | 33,418 cps        | 1.3 %         |
| 64Zn (KED)  | 51.847 ppb            | 315,628 cps       | 2.1 %         |
| 69Ga (KED)  | 0.371 ppb             | 2,514 cps         | 11.3 %        |
| 75As (KED)  | 0.092 ppb             | 172 cps           | 14.7 %        |
| 80Se (KED)  | 0.644 ppb             | 1,460 cps         | 8.0 %         |
| 85Rb (KED)  | 0.756 ppb             | 4,540 cps         | 1.5 %         |
| 88Sr (KED)  | 1.336 ppb             | 11,444 cps        | 2.8 %         |
| 89Y (KED)   | 116.442 %             | 427,756 cps       | 2.1 %         |
| 107Ag (KED) | 0.010 ppb             | 563 cps           | 7.7 %         |
| 114Cd (KED) | 0.009 ppb             | 231 cps           | 22.4 %        |
| 115In (KED) | 111.043 %             | 772,434 cps       | 1.0 %         |
| 133Cs (KED) | 0.015 ppb             | 452 cps           | 5.2 %         |
| 138Ba (KED) | 1.400 ppb             | 55,142 cps        | 0.9 %         |
| 139La (KED) | 0.063 ppb             | 5,244 cps         | 2.5 %         |
| 140Ce (KED) | 0.201 ppb             | 22,480 cps        | 3.3 %         |
| 141Pr (KED) | 0.015 ppb             | 1,767 cps         | 9.1 %         |
| 142Nd (KED) | 0.107 ppb             | 5,047 cps         | 4.5 %         |
| 152Sm (KED) | 0.012 ppb             | 490 cps           | 4.8 %         |
| 153Eu (KED) | 0.002 ppb             | 193 cps           | 1.7 %         |
| 158Gd (KED) | 0.010 ppb             | 587 cps           | 8.4 %         |
| 159Tb (KED) | 109.901 %             | 3,916,657 cps     | 2.1 %         |
| 164Dy (KED) | 0.007 ppb             | 460 cps           | 5.5 %         |
| 166Er (KED) | 0.002 ppb             | 626 cps           | 2.4 %         |
| 169Tm (KED) | 0.000 ppb             | 94 cps            | 30.8 %        |
| 174Yb (KED) | 0.002 ppb             | 248 cps           | 12.5 %        |
| 175Lu (KED) | -0.106 ppb            | 15,481 cps        | 1.9 %         |
| 205Tl (KED) | 0.002 ppb             | 327 cps           | 13.7 %        |
| 208Pb (KED) | 0.241 ppb             | 34,409 cps        | 1.4 %         |
| 209Bi (KED) | 103.537 %             | 3,300,495 cps     | 1.5 %         |
| 232Th (KED) | 0.015 ppb             | 3,622 cps         | 1.6 %         |
| 238U (KED)  | 0.005 ppb             | 1,452 cps         | 5.4 %         |

# Comprehensive

10/20/2021 6:11:31 PM

## Sample Summary

Instrument ID: iCAP Q

Analysis index: 20

Analysis name: 03050jian

Analysis started at: 10/20/2021 4:54:50 PM

User name: WINDOWS-UPCI4ER\Administrator

| Category    | Concentration average | Concentration RSD |
|-------------|-----------------------|-------------------|
| 6Li (KED)   | 104.655 %             | 0.7 %             |
| 9Be (KED)   | 0.029 ppb             | 213.0 %           |
| 11B (KED)   | 5.229 ppb             | 7.0 %             |
| 24Mg (KED)  | 576.970 ppb           | 1.1 %             |
| 27Al (KED)  | 416.907 ppb           | 0.9 %             |
| 45Sc (KED)  | 114.191 %             | 0.2 %             |
| 51V (KED)   | 0.765 ppb             | 2.8 %             |
| 52Cr (KED)  | 1.056 ppb             | 1.5 %             |
| 55Mn (KED)  | 12.219 ppb            | 2.3 %             |
| 56Fe (KED)  | 509.611 ppb           | 0.9 %             |
| 58Ni (KED)  | 2.037 ppb             | 2.3 %             |
| 59Co (KED)  | 0.221 ppb             | 5.8 %             |
| 63Cu (KED)  | 2.950 ppb             | 0.6 %             |
| 64Zn (KED)  | 61.483 ppb            | 0.4 %             |
| 69Ga (KED)  | 1.959 ppb             | 2.3 %             |
| 75As (KED)  | 0.266 ppb             | 5.7 %             |
| 80Se (KED)  | 0.766 ppb             | 12.1 %            |
| 85Rb (KED)  | 1.664 ppb             | 1.2 %             |
| 88Sr (KED)  | 12.967 ppb            | 0.3 %             |
| 89Y (KED)   | 108.540 %             | 1.2 %             |
| 107Ag (KED) | 0.016 ppb             | 7.1 %             |
| 114Cd (KED) | 0.015 ppb             | 18.7 %            |
| 115In (KED) | 103.804 %             | 1.6 %             |
| 133Cs (KED) | 0.063 ppb             | 3.4 %             |
| 138Ba (KED) | 6.928 ppb             | 2.2 %             |
| 139La (KED) | 0.475 ppb             | 1.9 %             |
| 140Ce (KED) | 0.994 ppb             | 2.2 %             |
| 141Pr (KED) | 0.115 ppb             | 4.6 %             |
| 142Nd (KED) | 0.614 ppb             | 3.3 %             |
| 152Sm (KED) | 0.081 ppb             | 8.6 %             |
| 153Eu (KED) | 0.016 ppb             | 4.2 %             |
| 158Gd (KED) | 0.067 ppb             | 6.3 %             |
| 159Tb (KED) | 102.753 %             | 2.4 %             |
| 164Dy (KED) | 0.047 ppb             | 4.3 %             |
| 166Er (KED) | 0.022 ppb             | 12.3 %            |
| 169Tm (KED) | 0.003 ppb             | 8.0 %             |
| 174Yb (KED) | 0.018 ppb             | 5.7 %             |
| 175Lu (KED) | -0.100 ppb            | 3.1 %             |
| 205Tl (KED) | 0.007 ppb             | 2.9 %             |
| 208Pb (KED) | 0.569 ppb             | 2.1 %             |
| 209Bi (KED) | 96.701 %              | 2.4 %             |
| 232Th (KED) | 0.114 ppb             | 2.3 %             |
| 238U (KED)  | 0.027 ppb             | 2.0 %             |

| Category   | Concentration average | Intensity average | Intensity RSD |
|------------|-----------------------|-------------------|---------------|
| 6Li (KED)  | 104.655 %             | 2,773 cps         | 0.7 %         |
| 9Be (KED)  | 0.029 ppb             | 6 cps             | 173.2 %       |
| 11B (KED)  | 5.229 ppb             | 742 cps           | 3.8 %         |
| 24Mg (KED) | 576.970 ppb           | 295,142 cps       | 1.5 %         |
| 27Al (KED) | 416.907 ppb           | 56,082 cps        | 1.0 %         |

# Comprehensive

10/20/2021 6:11:31 PM

| Category    | Concentration average | Intensity average | Intensity RSD |
|-------------|-----------------------|-------------------|---------------|
| 45Sc (KED)  | 114.191 %             | 45,119 cps        | 0.2 %         |
| 51V (KED)   | 0.765 ppb             | 6,094 cps         | 3.0 %         |
| 52Cr (KED)  | 1.056 ppb             | 13,280 cps        | 1.4 %         |
| 55Mn (KED)  | 12.219 ppb            | 78,755 cps        | 2.4 %         |
| 56Fe (KED)  | 509.611 ppb           | 5,925,558 cps     | 0.9 %         |
| 58Ni (KED)  | 2.037 ppb             | 31,589 cps        | 2.1 %         |
| 59Co (KED)  | 0.221 ppb             | 5,583 cps         | 6.0 %         |
| 63Cu (KED)  | 2.950 ppb             | 55,297 cps        | 0.6 %         |
| 64Zn (KED)  | 61.483 ppb            | 348,719 cps       | 0.8 %         |
| 69Ga (KED)  | 1.959 ppb             | 12,035 cps        | 1.4 %         |
| 75As (KED)  | 0.266 ppb             | 428 cps           | 5.2 %         |
| 80Se (KED)  | 0.766 ppb             | 1,426 cps         | 2.8 %         |
| 85Rb (KED)  | 1.664 ppb             | 9,303 cps         | 1.9 %         |
| 88Sr (KED)  | 12.967 ppb            | 101,898 cps       | 1.4 %         |
| 89Y (KED)   | 108.540 %             | 398,728 cps       | 1.2 %         |
| 107Ag (KED) | 0.016 ppb             | 813 cps           | 8.5 %         |
| 114Cd (KED) | 0.015 ppb             | 327 cps           | 16.4 %        |
| 115In (KED) | 103.804 %             | 722,079 cps       | 1.6 %         |
| 133Cs (KED) | 0.063 ppb             | 1,721 cps         | 4.9 %         |
| 138Ba (KED) | 6.928 ppb             | 249,455 cps       | 2.5 %         |
| 139La (KED) | 0.475 ppb             | 37,053 cps        | 1.2 %         |
| 140Ce (KED) | 0.994 ppb             | 103,502 cps       | 1.9 %         |
| 141Pr (KED) | 0.115 ppb             | 12,606 cps        | 2.4 %         |
| 142Nd (KED) | 0.614 ppb             | 26,970 cps        | 1.0 %         |
| 152Sm (KED) | 0.081 ppb             | 3,206 cps         | 7.3 %         |
| 153Eu (KED) | 0.016 ppb             | 1,239 cps         | 6.3 %         |
| 158Gd (KED) | 0.067 ppb             | 3,569 cps         | 5.4 %         |
| 159Tb (KED) | 102.753 %             | 3,661,935 cps     | 2.4 %         |
| 164Dy (KED) | 0.047 ppb             | 2,796 cps         | 2.2 %         |
| 166Er (KED) | 0.022 ppb             | 2,028 cps         | 9.4 %         |
| 169Tm (KED) | 0.003 ppb             | 782 cps           | 5.7 %         |
| 174Yb (KED) | 0.018 ppb             | 1,591 cps         | 5.6 %         |
| 175Lu (KED) | -0.100 ppb            | 15,278 cps        | 2.2 %         |
| 205Tl (KED) | 0.007 ppb             | 1,138 cps         | 3.5 %         |
| 208Pb (KED) | 0.569 ppb             | 69,678 cps        | 0.9 %         |
| 209Bi (KED) | 96.701 %              | 3,082,563 cps     | 2.4 %         |
| 232Th (KED) | 0.114 ppb             | 25,112 cps        | 1.1 %         |
| 238U (KED)  | 0.027 ppb             | 7,062 cps         | 1.4 %         |

# Comprehensive

10/20/2021 6:11:31 PM

## Sample Summary

Instrument ID: iCAP Q

Analysis index: 21

Analysis name: 03470jian

Analysis started at: 10/20/2021 4:59:17 PM

User name: WINDOWS-UPCI4ER\Administrator

| Category    | Concentration average | Concentration RSD |
|-------------|-----------------------|-------------------|
| 6Li (KED)   | 102.641 %             | 5.7 %             |
| 9Be (KED)   | 0.000 ppb             | 4,691.6 %         |
| 11B (KED)   | 12.767 ppb            | 9.7 %             |
| 24Mg (KED)  | 330.020 ppb           | 4.6 %             |
| 27Al (KED)  | 305.376 ppb           | 1.3 %             |
| 45Sc (KED)  | 109.430 %             | 1.1 %             |
| 51V (KED)   | 0.564 ppb             | 3.0 %             |
| 52Cr (KED)  | 1.219 ppb             | 3.4 %             |
| 55Mn (KED)  | 7.335 ppb             | 2.0 %             |
| 56Fe (KED)  | 315.815 ppb           | 1.2 %             |
| 58Ni (KED)  | 1.488 ppb             | 1.0 %             |
| 59Co (KED)  | 0.149 ppb             | 3.8 %             |
| 63Cu (KED)  | 3.918 ppb             | 1.5 %             |
| 64Zn (KED)  | 66.158 ppb            | 1.1 %             |
| 69Ga (KED)  | 1.530 ppb             | 0.3 %             |
| 75As (KED)  | 0.236 ppb             | 11.1 %            |
| 80Se (KED)  | 0.911 ppb             | 10.2 %            |
| 85Rb (KED)  | 0.993 ppb             | 3.4 %             |
| 88Sr (KED)  | 5.751 ppb             | 0.9 %             |
| 89Y (KED)   | 101.570 %             | 2.2 %             |
| 107Ag (KED) | 0.065 ppb             | 2.5 %             |
| 114Cd (KED) | 0.012 ppb             | 3.1 %             |
| 115In (KED) | 96.980 %              | 1.7 %             |
| 133Cs (KED) | 0.042 ppb             | 5.9 %             |
| 138Ba (KED) | 5.433 ppb             | 1.8 %             |
| 139La (KED) | 0.329 ppb             | 1.9 %             |
| 140Ce (KED) | 0.705 ppb             | 1.4 %             |
| 141Pr (KED) | 0.083 ppb             | 3.8 %             |
| 142Nd (KED) | 0.442 ppb             | 0.8 %             |
| 152Sm (KED) | 0.058 ppb             | 3.4 %             |
| 153Eu (KED) | 0.011 ppb             | 5.9 %             |
| 158Gd (KED) | 0.047 ppb             | 4.6 %             |
| 159Tb (KED) | 94.549 %              | 0.8 %             |
| 164Dy (KED) | 0.033 ppb             | 2.6 %             |
| 166Er (KED) | 0.013 ppb             | 9.6 %             |
| 169Tm (KED) | 0.002 ppb             | 7.0 %             |
| 174Yb (KED) | 0.013 ppb             | 8.0 %             |
| 175Lu (KED) | -0.100 ppb            | 2.9 %             |
| 205Tl (KED) | 0.004 ppb             | 5.7 %             |
| 208Pb (KED) | 0.710 ppb             | 1.7 %             |
| 209Bi (KED) | 89.929 %              | 1.2 %             |
| 232Th (KED) | 0.071 ppb             | 2.9 %             |
| 238U (KED)  | 0.021 ppb             | 0.5 %             |

| Category   | Concentration average | Intensity average | Intensity RSD |
|------------|-----------------------|-------------------|---------------|
| 6Li (KED)  | 102.641 %             | 2,719 cps         | 5.7 %         |
| 9Be (KED)  | 0.000 ppb             | 1 cps             | 173.2 %       |
| 11B (KED)  | 12.767 ppb            | 1,342 cps         | 6.6 %         |
| 24Mg (KED) | 330.020 ppb           | 165,315 cps       | 1.2 %         |
| 27Al (KED) | 305.376 ppb           | 39,385 cps        | 0.3 %         |

# Comprehensive

10/20/2021 6:11:31 PM

| Category    | Concentration average | Intensity average | Intensity RSD |
|-------------|-----------------------|-------------------|---------------|
| 45Sc (KED)  | 109.430 %             | 43,238 cps        | 1.1 %         |
| 51V (KED)   | 0.564 ppb             | 4,303 cps         | 3.7 %         |
| 52Cr (KED)  | 1.219 ppb             | 14,684 cps        | 4.0 %         |
| 55Mn (KED)  | 7.335 ppb             | 45,329 cps        | 3.0 %         |
| 56Fe (KED)  | 315.815 ppb           | 3,519,725 cps     | 1.5 %         |
| 58Ni (KED)  | 1.488 ppb             | 22,194 cps        | 1.4 %         |
| 59Co (KED)  | 0.149 ppb             | 3,618 cps         | 3.1 %         |
| 63Cu (KED)  | 3.918 ppb             | 68,521 cps        | 3.6 %         |
| 64Zn (KED)  | 66.158 ppb            | 351,054 cps       | 1.8 %         |
| 69Ga (KED)  | 1.530 ppb             | 8,810 cps         | 2.1 %         |
| 75As (KED)  | 0.236 ppb             | 357 cps           | 8.3 %         |
| 80Se (KED)  | 0.911 ppb             | 1,407 cps         | 5.2 %         |
| 85Rb (KED)  | 0.993 ppb             | 5,201 cps         | 1.6 %         |
| 88Sr (KED)  | 5.751 ppb             | 42,385 cps        | 2.0 %         |
| 89Y (KED)   | 101.570 %             | 373,122 cps       | 2.2 %         |
| 107Ag (KED) | 0.065 ppb             | 2,993 cps         | 3.3 %         |
| 114Cd (KED) | 0.012 ppb             | 266 cps           | 1.9 %         |
| 115In (KED) | 96.980 %              | 674,608 cps       | 1.7 %         |
| 133Cs (KED) | 0.042 ppb             | 1,066 cps         | 4.2 %         |
| 138Ba (KED) | 5.433 ppb             | 180,312 cps       | 2.2 %         |
| 139La (KED) | 0.329 ppb             | 23,637 cps        | 2.2 %         |
| 140Ce (KED) | 0.705 ppb             | 67,590 cps        | 2.0 %         |
| 141Pr (KED) | 0.083 ppb             | 8,411 cps         | 4.5 %         |
| 142Nd (KED) | 0.442 ppb             | 17,881 cps        | 0.5 %         |
| 152Sm (KED) | 0.058 ppb             | 2,090 cps         | 4.2 %         |
| 153Eu (KED) | 0.011 ppb             | 781 cps           | 6.5 %         |
| 158Gd (KED) | 0.047 ppb             | 2,322 cps         | 4.8 %         |
| 159Tb (KED) | 94.549 %              | 3,369,541 cps     | 0.8 %         |
| 164Dy (KED) | 0.033 ppb             | 1,808 cps         | 3.3 %         |
| 166Er (KED) | 0.013 ppb             | 1,231 cps         | 7.2 %         |
| 169Tm (KED) | 0.002 ppb             | 460 cps           | 6.3 %         |
| 174Yb (KED) | 0.013 ppb             | 1,038 cps         | 7.0 %         |
| 175Lu (KED) | -0.100 ppb            | 14,041 cps        | 3.6 %         |
| 205Tl (KED) | 0.004 ppb             | 596 cps           | 4.7 %         |
| 208Pb (KED) | 0.710 ppb             | 79,761 cps        | 1.5 %         |
| 209Bi (KED) | 89.929 %              | 2,866,696 cps     | 1.2 %         |
| 232Th (KED) | 0.071 ppb             | 14,668 cps        | 2.2 %         |
| 238U (KED)  | 0.021 ppb             | 5,104 cps         | 1.7 %         |

# Comprehensive

10/20/2021 6:11:31 PM

## Sample Summary

Instrument ID: iCAP Q

Analysis index: 22

Analysis name: 03266jian

Analysis started at: 10/20/2021 5:03:14 PM

User name: WINDOWS-UPCI4ER\Administrator

| Category    | Concentration average | Concentration RSD |
|-------------|-----------------------|-------------------|
| 6Li (KED)   | 128.735 %             | 3.1 %             |
| 9Be (KED)   | -0.007 ppb            | 0.0 %             |
| 11B (KED)   | 9.165 ppb             | 1.1 %             |
| 24Mg (KED)  | 135.405 ppb           | 3.8 %             |
| 27Al (KED)  | 100.270 ppb           | 1.4 %             |
| 45Sc (KED)  | 142.528 %             | 2.0 %             |
| 51V (KED)   | 0.187 ppb             | 1.9 %             |
| 52Cr (KED)  | 0.461 ppb             | 2.7 %             |
| 55Mn (KED)  | 2.656 ppb             | 1.4 %             |
| 56Fe (KED)  | 108.335 ppb           | 1.4 %             |
| 58Ni (KED)  | 0.671 ppb             | 3.4 %             |
| 59Co (KED)  | 0.054 ppb             | 8.4 %             |
| 63Cu (KED)  | 2.571 ppb             | 2.4 %             |
| 64Zn (KED)  | 48.938 ppb            | 0.4 %             |
| 69Ga (KED)  | 0.518 ppb             | 1.2 %             |
| 75As (KED)  | 0.070 ppb             | 39.8 %            |
| 80Se (KED)  | 0.164 ppb             | 119.1 %           |
| 85Rb (KED)  | 0.368 ppb             | 5.8 %             |
| 88Sr (KED)  | 2.470 ppb             | 1.3 %             |
| 89Y (KED)   | 135.315 %             | 0.2 %             |
| 107Ag (KED) | 0.014 ppb             | 5.8 %             |
| 114Cd (KED) | 0.007 ppb             | 13.8 %            |
| 115In (KED) | 129.987 %             | 2.7 %             |
| 133Cs (KED) | 0.013 ppb             | 7.1 %             |
| 138Ba (KED) | 1.770 ppb             | 1.4 %             |
| 139La (KED) | 0.093 ppb             | 1.8 %             |
| 140Ce (KED) | 0.212 ppb             | 1.7 %             |
| 141Pr (KED) | 0.024 ppb             | 5.5 %             |
| 142Nd (KED) | 0.128 ppb             | 2.9 %             |
| 152Sm (KED) | 0.016 ppb             | 10.3 %            |
| 153Eu (KED) | 0.003 ppb             | 6.5 %             |
| 158Gd (KED) | 0.014 ppb             | 13.0 %            |
| 159Tb (KED) | 133.271 %             | 1.8 %             |
| 164Dy (KED) | 0.011 ppb             | 3.5 %             |
| 166Er (KED) | 0.001 ppb             | 32.8 %            |
| 169Tm (KED) | 0.001 ppb             | 15.8 %            |
| 174Yb (KED) | 0.004 ppb             | 20.2 %            |
| 175Lu (KED) | -0.109 ppb            | 1.5 %             |
| 205Tl (KED) | 0.002 ppb             | 19.8 %            |
| 208Pb (KED) | 0.340 ppb             | 2.1 %             |
| 209Bi (KED) | 119.797 %             | 1.2 %             |
| 232Th (KED) | 0.024 ppb             | 2.3 %             |
| 238U (KED)  | 0.007 ppb             | 2.5 %             |

| Category   | Concentration average | Intensity average | Intensity RSD |
|------------|-----------------------|-------------------|---------------|
| 6Li (KED)  | 128.735 %             | 3,410 cps         | 3.1 %         |
| 9Be (KED)  | -0.007 ppb            | 0 cps             |               |
| 11B (KED)  | 9.165 ppb             | 1,317 cps         | 3.1 %         |
| 24Mg (KED) | 135.405 ppb           | 85,218 cps        | 0.7 %         |
| 27Al (KED) | 100.270 ppb           | 16,916 cps        | 0.7 %         |

# Comprehensive

10/20/2021 6:11:31 PM

| Category    | Concentration average | Intensity average | Intensity RSD |
|-------------|-----------------------|-------------------|---------------|
| 45Sc (KED)  | 142.528 %             | 56,316 cps        | 2.0 %         |
| 51V (KED)   | 0.187 ppb             | 1,860 cps         | 3.9 %         |
| 52Cr (KED)  | 0.461 ppb             | 7,282 cps         | 2.5 %         |
| 55Mn (KED)  | 2.656 ppb             | 21,403 cps        | 1.2 %         |
| 56Fe (KED)  | 108.335 ppb           | 1,573,853 cps     | 0.8 %         |
| 58Ni (KED)  | 0.671 ppb             | 13,258 cps        | 2.5 %         |
| 59Co (KED)  | 0.054 ppb             | 1,739 cps         | 7.4 %         |
| 63Cu (KED)  | 2.571 ppb             | 60,193 cps        | 2.6 %         |
| 64Zn (KED)  | 48.938 ppb            | 346,281 cps       | 0.7 %         |
| 69Ga (KED)  | 0.518 ppb             | 4,038 cps         | 1.4 %         |
| 75As (KED)  | 0.070 ppb             | 158 cps           | 33.7 %        |
| 80Se (KED)  | 0.164 ppb             | 1,380 cps         | 9.2 %         |
| 85Rb (KED)  | 0.368 ppb             | 2,578 cps         | 5.5 %         |
| 88Sr (KED)  | 2.470 ppb             | 24,388 cps        | 1.1 %         |
| 89Y (KED)   | 135.315 %             | 497,086 cps       | 0.2 %         |
| 107Ag (KED) | 0.014 ppb             | 900 cps           | 4.6 %         |
| 114Cd (KED) | 0.007 ppb             | 230 cps           | 12.9 %        |
| 115In (KED) | 129.987 %             | 904,212 cps       | 2.7 %         |
| 133Cs (KED) | 0.013 ppb             | 457 cps           | 7.4 %         |
| 138Ba (KED) | 1.770 ppb             | 84,020 cps        | 0.6 %         |
| 139La (KED) | 0.093 ppb             | 9,412 cps         | 1.5 %         |
| 140Ce (KED) | 0.212 ppb             | 28,704 cps        | 0.2 %         |
| 141Pr (KED) | 0.024 ppb             | 3,477 cps         | 6.5 %         |
| 142Nd (KED) | 0.128 ppb             | 7,315 cps         | 1.5 %         |
| 152Sm (KED) | 0.016 ppb             | 824 cps           | 9.2 %         |
| 153Eu (KED) | 0.003 ppb             | 352 cps           | 4.5 %         |
| 158Gd (KED) | 0.014 ppb             | 983 cps           | 11.0 %        |
| 159Tb (KED) | 133.271 %             | 4,749,509 cps     | 1.8 %         |
| 164Dy (KED) | 0.011 ppb             | 843 cps           | 5.0 %         |
| 166Er (KED) | 0.001 ppb             | 702 cps           | 3.6 %         |
| 169Tm (KED) | 0.001 ppb             | 227 cps           | 15.9 %        |
| 174Yb (KED) | 0.004 ppb             | 429 cps           | 16.9 %        |
| 175Lu (KED) | -0.109 ppb            | 18,232 cps        | 3.5 %         |
| 205Tl (KED) | 0.002 ppb             | 318 cps           | 20.0 %        |
| 208Pb (KED) | 0.340 ppb             | 53,859 cps        | 0.7 %         |
| 209Bi (KED) | 119.797 %             | 3,818,799 cps     | 1.2 %         |
| 232Th (KED) | 0.024 ppb             | 6,552 cps         | 1.4 %         |
| 238U (KED)  | 0.007 ppb             | 2,356 cps         | 3.3 %         |

# Comprehensive

10/20/2021 6:11:31 PM

## Sample Summary

Instrument ID: iCAP Q

Analysis index: 23

Analysis name: 3343jian

Analysis started at: 10/20/2021 5:06:34 PM

User name: WINDOWS-UPCI4ER\Administrator

| Category    | Concentration average | Concentration RSD |
|-------------|-----------------------|-------------------|
| 6Li (KED)   | 141.405 %             | 2.1 %             |
| 9Be (KED)   | -0.001 ppb            | 658.8 %           |
| 11B (KED)   | 7.303 ppb             | 7.3 %             |
| 24Mg (KED)  | 228.111 ppb           | 1.5 %             |
| 27Al (KED)  | 156.484 ppb           | 0.4 %             |
| 45Sc (KED)  | 147.169 %             | 2.4 %             |
| 51V (KED)   | 0.301 ppb             | 1.7 %             |
| 52Cr (KED)  | 0.616 ppb             | 3.5 %             |
| 55Mn (KED)  | 4.767 ppb             | 0.6 %             |
| 56Fe (KED)  | 179.626 ppb           | 1.3 %             |
| 58Ni (KED)  | 0.892 ppb             | 2.5 %             |
| 59Co (KED)  | 0.095 ppb             | 5.4 %             |
| 63Cu (KED)  | 2.585 ppb             | 0.6 %             |
| 64Zn (KED)  | 43.168 ppb            | 0.8 %             |
| 69Ga (KED)  | 0.874 ppb             | 7.1 %             |
| 75As (KED)  | 0.121 ppb             | 6.4 %             |
| 80Se (KED)  | 0.143 ppb             | 80.7 %            |
| 85Rb (KED)  | 0.927 ppb             | 2.2 %             |
| 88Sr (KED)  | 4.803 ppb             | 1.6 %             |
| 89Y (KED)   | 139.835 %             | 2.0 %             |
| 107Ag (KED) | 0.017 ppb             | 5.8 %             |
| 114Cd (KED) | 0.007 ppb             | 20.2 %            |
| 115In (KED) | 132.555 %             | 1.4 %             |
| 133Cs (KED) | 0.021 ppb             | 3.4 %             |
| 138Ba (KED) | 2.988 ppb             | 2.8 %             |
| 139La (KED) | 0.193 ppb             | 2.5 %             |
| 140Ce (KED) | 0.421 ppb             | 0.8 %             |
| 141Pr (KED) | 0.048 ppb             | 2.3 %             |
| 142Nd (KED) | 0.263 ppb             | 0.4 %             |
| 152Sm (KED) | 0.032 ppb             | 4.2 %             |
| 153Eu (KED) | 0.006 ppb             | 5.5 %             |
| 158Gd (KED) | 0.027 ppb             | 4.0 %             |
| 159Tb (KED) | 137.630 %             | 2.0 %             |
| 164Dy (KED) | 0.018 ppb             | 5.5 %             |
| 166Er (KED) | 0.005 ppb             | 10.8 %            |
| 169Tm (KED) | 0.001 ppb             | 4.4 %             |
| 174Yb (KED) | 0.007 ppb             | 7.6 %             |
| 175Lu (KED) | -0.107 ppb            | 1.1 %             |
| 205Tl (KED) | 0.003 ppb             | 8.8 %             |
| 208Pb (KED) | 0.425 ppb             | 2.7 %             |
| 209Bi (KED) | 122.496 %             | 2.1 %             |
| 232Th (KED) | 0.045 ppb             | 2.6 %             |
| 238U (KED)  | 0.012 ppb             | 2.0 %             |

| Category   | Concentration average | Intensity average | Intensity RSD |
|------------|-----------------------|-------------------|---------------|
| 6Li (KED)  | 141.405 %             | 3,746 cps         | 2.1 %         |
| 9Be (KED)  | -0.001 ppb            | 1 cps             | 173.2 %       |
| 11B (KED)  | 7.303 ppb             | 1,237 cps         | 5.6 %         |
| 24Mg (KED) | 228.111 ppb           | 157,733 cps       | 2.6 %         |
| 27Al (KED) | 156.484 ppb           | 27,199 cps        | 2.0 %         |

# Comprehensive

10/20/2021 6:11:31 PM

| Category    | Concentration average | Intensity average | Intensity RSD |
|-------------|-----------------------|-------------------|---------------|
| 45Sc (KED)  | 147.169 %             | 58,150 cps        | 2.4 %         |
| 51V (KED)   | 0.301 ppb             | 3,087 cps         | 2.6 %         |
| 52Cr (KED)  | 0.616 ppb             | 10,004 cps        | 1.2 %         |
| 55Mn (KED)  | 4.767 ppb             | 39,631 cps        | 2.8 %         |
| 56Fe (KED)  | 179.626 ppb           | 2,693,029 cps     | 1.9 %         |
| 58Ni (KED)  | 0.892 ppb             | 18,052 cps        | 0.4 %         |
| 59Co (KED)  | 0.095 ppb             | 3,096 cps         | 3.9 %         |
| 63Cu (KED)  | 2.585 ppb             | 62,540 cps        | 2.3 %         |
| 64Zn (KED)  | 43.168 ppb            | 315,764 cps       | 1.4 %         |
| 69Ga (KED)  | 0.874 ppb             | 6,974 cps         | 8.7 %         |
| 75As (KED)  | 0.121 ppb             | 263 cps           | 6.7 %         |
| 80Se (KED)  | 0.143 ppb             | 1,411 cps         | 4.9 %         |
| 85Rb (KED)  | 0.927 ppb             | 6,685 cps         | 0.9 %         |
| 88Sr (KED)  | 4.803 ppb             | 48,777 cps        | 2.7 %         |
| 89Y (KED)   | 139.835 %             | 513,690 cps       | 2.0 %         |
| 107Ag (KED) | 0.017 ppb             | 1,117 cps         | 4.7 %         |
| 114Cd (KED) | 0.007 ppb             | 231 cps           | 14.4 %        |
| 115In (KED) | 132.555 %             | 922,076 cps       | 1.4 %         |
| 133Cs (KED) | 0.021 ppb             | 750 cps           | 4.6 %         |
| 138Ba (KED) | 2.988 ppb             | 145,187 cps       | 2.4 %         |
| 139La (KED) | 0.193 ppb             | 20,124 cps        | 3.3 %         |
| 140Ce (KED) | 0.421 ppb             | 58,734 cps        | 1.4 %         |
| 141Pr (KED) | 0.048 ppb             | 7,014 cps         | 1.8 %         |
| 142Nd (KED) | 0.263 ppb             | 15,491 cps        | 2.2 %         |
| 152Sm (KED) | 0.032 ppb             | 1,667 cps         | 5.1 %         |
| 153Eu (KED) | 0.006 ppb             | 662 cps           | 6.5 %         |
| 158Gd (KED) | 0.027 ppb             | 1,898 cps         | 2.2 %         |
| 159Tb (KED) | 137.630 %             | 4,904,870 cps     | 2.0 %         |
| 164Dy (KED) | 0.018 ppb             | 1,499 cps         | 5.2 %         |
| 166Er (KED) | 0.005 ppb             | 1,107 cps         | 6.8 %         |
| 169Tm (KED) | 0.001 ppb             | 356 cps           | 6.2 %         |
| 174Yb (KED) | 0.007 ppb             | 826 cps           | 6.1 %         |
| 175Lu (KED) | -0.107 ppb            | 19,224 cps        | 1.4 %         |
| 205Tl (KED) | 0.003 ppb             | 618 cps           | 7.8 %         |
| 208Pb (KED) | 0.425 ppb             | 67,389 cps        | 0.9 %         |
| 209Bi (KED) | 122.496 %             | 3,904,841 cps     | 2.1 %         |
| 232Th (KED) | 0.045 ppb             | 12,661 cps        | 3.8 %         |
| 238U (KED)  | 0.012 ppb             | 3,943 cps         | 3.1 %         |

# Comprehensive

10/20/2021 6:11:31 PM

## Sample Summary

Instrument ID: iCAP Q

Analysis index: 24

Analysis name: 03260jian

Analysis started at: 10/20/2021 5:09:53 PM

User name: WINDOWS-UPCI4ER\Administrator

| Category    | Concentration average | Concentration RSD |
|-------------|-----------------------|-------------------|
| 6Li (KED)   | 131.462 %             | 2.2 %             |
| 9Be (KED)   | -0.001 ppb            | 879.7 %           |
| 11B (KED)   | 9.020 ppb             | 4.0 %             |
| 24Mg (KED)  | 139.605 ppb           | 0.4 %             |
| 27Al (KED)  | 83.182 ppb            | 3.9 %             |
| 45Sc (KED)  | 140.181 %             | 1.8 %             |
| 51V (KED)   | 0.161 ppb             | 3.7 %             |
| 52Cr (KED)  | 0.793 ppb             | 1.7 %             |
| 55Mn (KED)  | 2.669 ppb             | 2.6 %             |
| 56Fe (KED)  | 93.805 ppb            | 1.7 %             |
| 58Ni (KED)  | 0.584 ppb             | 2.4 %             |
| 59Co (KED)  | 0.051 ppb             | 2.9 %             |
| 63Cu (KED)  | 2.149 ppb             | 0.2 %             |
| 64Zn (KED)  | 46.070 ppb            | 1.2 %             |
| 69Ga (KED)  | 0.460 ppb             | 6.8 %             |
| 75As (KED)  | 0.069 ppb             | 7.0 %             |
| 80Se (KED)  | 0.274 ppb             | 8.4 %             |
| 85Rb (KED)  | 0.555 ppb             | 1.5 %             |
| 88Sr (KED)  | 3.303 ppb             | 1.3 %             |
| 89Y (KED)   | 132.668 %             | 0.6 %             |
| 107Ag (KED) | 0.030 ppb             | 1.9 %             |
| 114Cd (KED) | 0.013 ppb             | 8.6 %             |
| 115In (KED) | 126.686 %             | 1.8 %             |
| 133Cs (KED) | 0.012 ppb             | 9.7 %             |
| 138Ba (KED) | 1.589 ppb             | 2.1 %             |
| 139La (KED) | 0.082 ppb             | 1.0 %             |
| 140Ce (KED) | 0.189 ppb             | 1.2 %             |
| 141Pr (KED) | 0.019 ppb             | 1.3 %             |
| 142Nd (KED) | 0.116 ppb             | 3.6 %             |
| 152Sm (KED) | 0.013 ppb             | 5.4 %             |
| 153Eu (KED) | 0.003 ppb             | 13.1 %            |
| 158Gd (KED) | 0.012 ppb             | 6.0 %             |
| 159Tb (KED) | 131.728 %             | 2.9 %             |
| 164Dy (KED) | 0.008 ppb             | 1.0 %             |
| 166Er (KED) | 0.000 ppb             | 64.0 %            |
| 169Tm (KED) | 0.001 ppb             | 7.7 %             |
| 174Yb (KED) | 0.003 ppb             | 7.2 %             |
| 175Lu (KED) | -0.110 ppb            | 3.0 %             |
| 205Tl (KED) | 0.002 ppb             | 2.5 %             |
| 208Pb (KED) | 0.317 ppb             | 2.4 %             |
| 209Bi (KED) | 117.640 %             | 2.2 %             |
| 232Th (KED) | 0.021 ppb             | 1.4 %             |
| 238U (KED)  | 0.007 ppb             | 5.7 %             |

| Category   | Concentration average | Intensity average | Intensity RSD |
|------------|-----------------------|-------------------|---------------|
| 6Li (KED)  | 131.462 %             | 3,483 cps         | 2.2 %         |
| 9Be (KED)  | -0.001 ppb            | 1 cps             | 173.2 %       |
| 11B (KED)  | 9.020 ppb             | 1,330 cps         | 5.1 %         |
| 24Mg (KED) | 139.605 ppb           | 89,784 cps        | 1.9 %         |
| 27Al (KED) | 83.182 ppb            | 13,824 cps        | 4.6 %         |

# Comprehensive

10/20/2021 6:11:31 PM

| Category    | Concentration average | Intensity average | Intensity RSD |
|-------------|-----------------------|-------------------|---------------|
| 45Sc (KED)  | 140.181 %             | 55,388 cps        | 1.8 %         |
| 51V (KED)   | 0.161 ppb             | 1,573 cps         | 2.0 %         |
| 52Cr (KED)  | 0.793 ppb             | 12,262 cps        | 0.3 %         |
| 55Mn (KED)  | 2.669 ppb             | 21,159 cps        | 3.7 %         |
| 56Fe (KED)  | 93.805 ppb            | 1,340,837 cps     | 2.3 %         |
| 58Ni (KED)  | 0.584 ppb             | 11,409 cps        | 3.3 %         |
| 59Co (KED)  | 0.051 ppb             | 1,607 cps         | 3.3 %         |
| 63Cu (KED)  | 2.149 ppb             | 49,478 cps        | 0.7 %         |
| 64Zn (KED)  | 46.070 ppb            | 319,686 cps       | 1.8 %         |
| 69Ga (KED)  | 0.460 ppb             | 3,525 cps         | 7.2 %         |
| 75As (KED)  | 0.069 ppb             | 152 cps           | 5.5 %         |
| 80Se (KED)  | 0.274 ppb             | 1,425 cps         | 1.1 %         |
| 85Rb (KED)  | 0.555 ppb             | 3,807 cps         | 2.0 %         |
| 88Sr (KED)  | 3.303 ppb             | 31,893 cps        | 1.4 %         |
| 89Y (KED)   | 132.668 %             | 487,363 cps       | 0.6 %         |
| 107Ag (KED) | 0.030 ppb             | 1,813 cps         | 0.7 %         |
| 114Cd (KED) | 0.013 ppb             | 352 cps           | 8.5 %         |
| 115In (KED) | 126.686 %             | 881,250 cps       | 1.8 %         |
| 133Cs (KED) | 0.012 ppb             | 431 cps           | 10.5 %        |
| 138Ba (KED) | 1.589 ppb             | 74,742 cps        | 1.5 %         |
| 139La (KED) | 0.082 ppb             | 8,208 cps         | 2.0 %         |
| 140Ce (KED) | 0.189 ppb             | 25,395 cps        | 2.0 %         |
| 141Pr (KED) | 0.019 ppb             | 2,730 cps         | 3.2 %         |
| 142Nd (KED) | 0.116 ppb             | 6,540 cps         | 4.4 %         |
| 152Sm (KED) | 0.013 ppb             | 654 cps           | 7.7 %         |
| 153Eu (KED) | 0.003 ppb             | 287 cps           | 13.4 %        |
| 158Gd (KED) | 0.012 ppb             | 853 cps           | 3.1 %         |
| 159Tb (KED) | 131.728 %             | 4,694,543 cps     | 2.9 %         |
| 164Dy (KED) | 0.008 ppb             | 630 cps           | 3.7 %         |
| 166Er (KED) | 0.000 ppb             | 609 cps           | 0.3 %         |
| 169Tm (KED) | 0.001 ppb             | 179 cps           | 7.5 %         |
| 174Yb (KED) | 0.003 ppb             | 384 cps           | 4.8 %         |
| 175Lu (KED) | -0.110 ppb            | 17,824 cps        | 0.4 %         |
| 205Tl (KED) | 0.002 ppb             | 452 cps           | 3.7 %         |
| 208Pb (KED) | 0.317 ppb             | 49,752 cps        | 0.8 %         |
| 209Bi (KED) | 117.640 %             | 3,750,067 cps     | 2.2 %         |
| 232Th (KED) | 0.021 ppb             | 5,657 cps         | 2.6 %         |
| 238U (KED)  | 0.007 ppb             | 2,181 cps         | 6.5 %         |

# Comprehensive

10/20/2021 6:11:31 PM

## Sample Summary

Instrument ID: iCAP Q

Analysis index: 25

Analysis name: 03271jian

Analysis started at: 10/20/2021 5:13:12 PM

User name: WINDOWS-UPCI4ER\Administrator

| Category    | Concentration average | Concentration RSD |
|-------------|-----------------------|-------------------|
| 6Li (KED)   | 130.203 %             | 4.8 %             |
| 9Be (KED)   | -0.001 ppb            | 874.7 %           |
| 11B (KED)   | 23.213 ppb            | 5.6 %             |
| 24Mg (KED)  | 128.905 ppb           | 2.9 %             |
| 27Al (KED)  | 93.106 ppb            | 1.9 %             |
| 45Sc (KED)  | 137.760 %             | 1.9 %             |
| 51V (KED)   | 0.174 ppb             | 2.6 %             |
| 52Cr (KED)  | 0.530 ppb             | 4.8 %             |
| 55Mn (KED)  | 2.701 ppb             | 1.2 %             |
| 56Fe (KED)  | 102.911 ppb           | 0.5 %             |
| 58Ni (KED)  | 0.634 ppb             | 1.2 %             |
| 59Co (KED)  | 0.049 ppb             | 2.4 %             |
| 63Cu (KED)  | 1.963 ppb             | 1.4 %             |
| 64Zn (KED)  | 46.227 ppb            | 0.4 %             |
| 69Ga (KED)  | 0.517 ppb             | 2.0 %             |
| 75As (KED)  | 0.093 ppb             | 12.1 %            |
| 80Se (KED)  | 0.150 ppb             | 58.9 %            |
| 85Rb (KED)  | 0.474 ppb             | 5.9 %             |
| 88Sr (KED)  | 2.356 ppb             | 1.6 %             |
| 89Y (KED)   | 132.452 %             | 1.5 %             |
| 107Ag (KED) | 0.035 ppb             | 5.0 %             |
| 114Cd (KED) | 0.004 ppb             | 43.3 %            |
| 115In (KED) | 124.798 %             | 1.6 %             |
| 133Cs (KED) | 0.012 ppb             | 12.1 %            |
| 138Ba (KED) | 1.827 ppb             | 4.2 %             |
| 139La (KED) | 0.093 ppb             | 1.3 %             |
| 140Ce (KED) | 0.209 ppb             | 1.6 %             |
| 141Pr (KED) | 0.024 ppb             | 2.6 %             |
| 142Nd (KED) | 0.133 ppb             | 2.5 %             |
| 152Sm (KED) | 0.018 ppb             | 6.2 %             |
| 153Eu (KED) | 0.004 ppb             | 4.5 %             |
| 158Gd (KED) | 0.015 ppb             | 4.4 %             |
| 159Tb (KED) | 129.940 %             | 3.4 %             |
| 164Dy (KED) | 0.011 ppb             | 12.1 %            |
| 166Er (KED) | 0.001 ppb             | 75.1 %            |
| 169Tm (KED) | 0.001 ppb             | 17.6 %            |
| 174Yb (KED) | 0.004 ppb             | 4.6 %             |
| 175Lu (KED) | -0.110 ppb            | 3.5 %             |
| 205Tl (KED) | 0.001 ppb             | 8.7 %             |
| 208Pb (KED) | 0.236 ppb             | 2.8 %             |
| 209Bi (KED) | 117.471 %             | 1.4 %             |
| 232Th (KED) | 0.024 ppb             | 1.4 %             |
| 238U (KED)  | 0.007 ppb             | 5.0 %             |

| Category   | Concentration average | Intensity average | Intensity RSD |
|------------|-----------------------|-------------------|---------------|
| 6Li (KED)  | 130.203 %             | 3,449 cps         | 4.8 %         |
| 9Be (KED)  | -0.001 ppb            | 1 cps             | 173.2 %       |
| 11B (KED)  | 23.213 ppb            | 2,787 cps         | 5.2 %         |
| 24Mg (KED) | 128.905 ppb           | 82,046 cps        | 2.1 %         |
| 27Al (KED) | 93.106 ppb            | 15,189 cps        | 1.2 %         |

# Comprehensive

10/20/2021 6:11:31 PM

| Category    | Concentration average | Intensity average | Intensity RSD |
|-------------|-----------------------|-------------------|---------------|
| 45Sc (KED)  | 137.760 %             | 54,432 cps        | 1.9 %         |
| 51V (KED)   | 0.174 ppb             | 1,678 cps         | 1.0 %         |
| 52Cr (KED)  | 0.530 ppb             | 8,084 cps         | 6.6 %         |
| 55Mn (KED)  | 2.701 ppb             | 21,041 cps        | 2.5 %         |
| 56Fe (KED)  | 102.911 ppb           | 1,445,342 cps     | 1.7 %         |
| 58Ni (KED)  | 0.634 ppb             | 12,136 cps        | 1.9 %         |
| 59Co (KED)  | 0.049 ppb             | 1,518 cps         | 0.5 %         |
| 63Cu (KED)  | 1.963 ppb             | 45,184 cps        | 1.2 %         |
| 64Zn (KED)  | 46.227 ppb            | 320,226 cps       | 1.2 %         |
| 69Ga (KED)  | 0.517 ppb             | 3,945 cps         | 3.5 %         |
| 75As (KED)  | 0.093 ppb             | 198 cps           | 9.3 %         |
| 80Se (KED)  | 0.150 ppb             | 1,342 cps         | 5.2 %         |
| 85Rb (KED)  | 0.474 ppb             | 3,250 cps         | 6.1 %         |
| 88Sr (KED)  | 2.356 ppb             | 22,781 cps        | 2.6 %         |
| 89Y (KED)   | 132.452 %             | 486,569 cps       | 1.5 %         |
| 107Ag (KED) | 0.035 ppb             | 2,115 cps         | 4.5 %         |
| 114Cd (KED) | 0.004 ppb             | 158 cps           | 26.4 %        |
| 115In (KED) | 124.798 %             | 868,116 cps       | 1.6 %         |
| 133Cs (KED) | 0.012 ppb             | 423 cps           | 12.7 %        |
| 138Ba (KED) | 1.827 ppb             | 84,469 cps        | 1.3 %         |
| 139La (KED) | 0.093 ppb             | 9,209 cps         | 2.8 %         |
| 140Ce (KED) | 0.209 ppb             | 27,635 cps        | 1.8 %         |
| 141Pr (KED) | 0.024 ppb             | 3,343 cps         | 1.3 %         |
| 142Nd (KED) | 0.133 ppb             | 7,392 cps         | 0.9 %         |
| 152Sm (KED) | 0.018 ppb             | 913 cps           | 9.4 %         |
| 153Eu (KED) | 0.004 ppb             | 388 cps           | 1.8 %         |
| 158Gd (KED) | 0.015 ppb             | 1,050 cps         | 4.7 %         |
| 159Tb (KED) | 129.940 %             | 4,630,823 cps     | 3.4 %         |
| 164Dy (KED) | 0.011 ppb             | 826 cps           | 8.4 %         |
| 166Er (KED) | 0.001 ppb             | 697 cps           | 10.4 %        |
| 169Tm (KED) | 0.001 ppb             | 198 cps           | 16.4 %        |
| 174Yb (KED) | 0.004 ppb             | 443 cps           | 3.4 %         |
| 175Lu (KED) | -0.110 ppb            | 17,579 cps        | 0.5 %         |
| 205Tl (KED) | 0.001 ppb             | 300 cps           | 7.8 %         |
| 208Pb (KED) | 0.236 ppb             | 38,399 cps        | 1.6 %         |
| 209Bi (KED) | 117.471 %             | 3,744,676 cps     | 1.4 %         |
| 232Th (KED) | 0.024 ppb             | 6,387 cps         | 0.9 %         |
| 238U (KED)  | 0.007 ppb             | 2,445 cps         | 6.2 %         |

# Comprehensive

10/20/2021 6:11:31 PM

## Sample Summary

Instrument ID: iCAP Q

Analysis index: 26

Analysis name: 03272jian

Analysis started at: 10/20/2021 5:16:31 PM

User name: WINDOWS-UPCI4ER\Administrator

| Category    | Concentration average | Concentration RSD |
|-------------|-----------------------|-------------------|
| 6Li (KED)   | 134.231 %             | 3.3 %             |
| 9Be (KED)   | 0.004 ppb             | 213.9 %           |
| 11B (KED)   | 27.528 ppb            | 4.5 %             |
| 24Mg (KED)  | 138.478 ppb           | 5.3 %             |
| 27Al (KED)  | 90.266 ppb            | 2.0 %             |
| 45Sc (KED)  | 141.175 %             | 1.9 %             |
| 51V (KED)   | 0.198 ppb             | 3.5 %             |
| 52Cr (KED)  | 1.309 ppb             | 16.2 %            |
| 55Mn (KED)  | 3.063 ppb             | 2.5 %             |
| 56Fe (KED)  | 107.861 ppb           | 3.4 %             |
| 58Ni (KED)  | 0.612 ppb             | 4.9 %             |
| 59Co (KED)  | 0.058 ppb             | 9.7 %             |
| 63Cu (KED)  | 1.928 ppb             | 2.1 %             |
| 64Zn (KED)  | 53.312 ppb            | 3.9 %             |
| 69Ga (KED)  | 0.479 ppb             | 0.9 %             |
| 75As (KED)  | 0.109 ppb             | 11.2 %            |
| 80Se (KED)  | 0.103 ppb             | 150.4 %           |
| 85Rb (KED)  | 0.565 ppb             | 0.7 %             |
| 88Sr (KED)  | 3.748 ppb             | 0.5 %             |
| 89Y (KED)   | 133.969 %             | 1.3 %             |
| 107Ag (KED) | 0.012 ppb             | 8.6 %             |
| 114Cd (KED) | 0.007 ppb             | 26.9 %            |
| 115In (KED) | 127.871 %             | 1.0 %             |
| 133Cs (KED) | 0.014 ppb             | 4.2 %             |
| 138Ba (KED) | 1.653 ppb             | 1.0 %             |
| 139La (KED) | 0.107 ppb             | 3.5 %             |
| 140Ce (KED) | 0.229 ppb             | 3.3 %             |
| 141Pr (KED) | 0.027 ppb             | 4.2 %             |
| 142Nd (KED) | 0.145 ppb             | 5.3 %             |
| 152Sm (KED) | 0.019 ppb             | 4.9 %             |
| 153Eu (KED) | 0.004 ppb             | 6.8 %             |
| 158Gd (KED) | 0.016 ppb             | 4.5 %             |
| 159Tb (KED) | 133.308 %             | 2.8 %             |
| 164Dy (KED) | 0.011 ppb             | 2.6 %             |
| 166Er (KED) | 0.001 ppb             | 48.8 %            |
| 169Tm (KED) | 0.001 ppb             | 22.5 %            |
| 174Yb (KED) | 0.005 ppb             | 3.4 %             |
| 175Lu (KED) | -0.114 ppb            | 0.5 %             |
| 205Tl (KED) | 0.003 ppb             | 3.7 %             |
| 208Pb (KED) | 0.274 ppb             | 5.7 %             |
| 209Bi (KED) | 119.135 %             | 2.0 %             |
| 232Th (KED) | 0.022 ppb             | 1.3 %             |
| 238U (KED)  | 0.007 ppb             | 4.1 %             |

| Category   | Concentration average | Intensity average | Intensity RSD |
|------------|-----------------------|-------------------|---------------|
| 6Li (KED)  | 134.231 %             | 3,556 cps         | 3.3 %         |
| 9Be (KED)  | 0.004 ppb             | 2 cps             | 86.6 %        |
| 11B (KED)  | 27.528 ppb            | 3,334 cps         | 1.4 %         |
| 24Mg (KED) | 138.478 ppb           | 90,839 cps        | 2.2 %         |
| 27Al (KED) | 90.266 ppb            | 15,096 cps        | 2.2 %         |

# Comprehensive

10/20/2021 6:11:31 PM

| Category    | Concentration average | Intensity average | Intensity RSD |
|-------------|-----------------------|-------------------|---------------|
| 45Sc (KED)  | 141.175 %             | 55,781 cps        | 1.9 %         |
| 51V (KED)   | 0.198 ppb             | 1,959 cps         | 5.4 %         |
| 52Cr (KED)  | 1.309 ppb             | 20,363 cps        | 18.1 %        |
| 55Mn (KED)  | 3.063 ppb             | 24,454 cps        | 4.1 %         |
| 56Fe (KED)  | 107.861 ppb           | 1,552,797 cps     | 4.8 %         |
| 58Ni (KED)  | 0.612 ppb             | 12,026 cps        | 5.4 %         |
| 59Co (KED)  | 0.058 ppb             | 1,826 cps         | 11.3 %        |
| 63Cu (KED)  | 1.928 ppb             | 44,927 cps        | 3.2 %         |
| 64Zn (KED)  | 53.312 ppb            | 373,485 cps       | 5.0 %         |
| 69Ga (KED)  | 0.479 ppb             | 3,703 cps         | 1.5 %         |
| 75As (KED)  | 0.109 ppb             | 230 cps           | 9.1 %         |
| 80Se (KED)  | 0.103 ppb             | 1,326 cps         | 6.4 %         |
| 85Rb (KED)  | 0.565 ppb             | 3,908 cps         | 1.4 %         |
| 88Sr (KED)  | 3.748 ppb             | 36,514 cps        | 1.4 %         |
| 89Y (KED)   | 133.969 %             | 492,140 cps       | 1.3 %         |
| 107Ag (KED) | 0.012 ppb             | 727 cps           | 7.4 %         |
| 114Cd (KED) | 0.007 ppb             | 213 cps           | 19.0 %        |
| 115In (KED) | 127.871 %             | 889,496 cps       | 1.0 %         |
| 133Cs (KED) | 0.014 ppb             | 481 cps           | 3.1 %         |
| 138Ba (KED) | 1.653 ppb             | 78,642 cps        | 1.9 %         |
| 139La (KED) | 0.107 ppb             | 10,875 cps        | 6.2 %         |
| 140Ce (KED) | 0.229 ppb             | 31,101 cps        | 6.1 %         |
| 141Pr (KED) | 0.027 ppb             | 3,816 cps         | 6.9 %         |
| 142Nd (KED) | 0.145 ppb             | 8,317 cps         | 7.9 %         |
| 152Sm (KED) | 0.019 ppb             | 959 cps           | 7.6 %         |
| 153Eu (KED) | 0.004 ppb             | 376 cps           | 8.9 %         |
| 158Gd (KED) | 0.016 ppb             | 1,128 cps         | 7.0 %         |
| 159Tb (KED) | 133.308 %             | 4,750,832 cps     | 2.8 %         |
| 164Dy (KED) | 0.011 ppb             | 914 cps           | 5.2 %         |
| 166Er (KED) | 0.001 ppb             | 709 cps           | 10.7 %        |
| 169Tm (KED) | 0.001 ppb             | 232 cps           | 19.0 %        |
| 174Yb (KED) | 0.005 ppb             | 561 cps           | 5.9 %         |
| 175Lu (KED) | -0.114 ppb            | 17,319 cps        | 3.2 %         |
| 205Tl (KED) | 0.003 ppb             | 563 cps           | 3.1 %         |
| 208Pb (KED) | 0.274 ppb             | 44,390 cps        | 6.9 %         |
| 209Bi (KED) | 119.135 %             | 3,797,706 cps     | 2.0 %         |
| 232Th (KED) | 0.022 ppb             | 5,989 cps         | 2.5 %         |
| 238U (KED)  | 0.007 ppb             | 2,390 cps         | 5.9 %         |

# Comprehensive

10/20/2021 6:11:31 PM

## Sample Summary

Instrument ID: iCAP Q

Analysis index: 27

Analysis name: w29jian

Analysis started at: 10/20/2021 5:19:47 PM

User name: WINDOWS-UPCI4ER\Administrator

| Category    | Concentration average | Concentration RSD |
|-------------|-----------------------|-------------------|
| 6Li (KED)   | 132.930 %             | 3.6 %             |
| 9Be (KED)   | -0.001 ppb            | 1,238.6 %         |
| 11B (KED)   | 6.438 ppb             | 12.9 %            |
| 24Mg (KED)  | 120.115 ppb           | 4.3 %             |
| 27Al (KED)  | 72.924 ppb            | 0.7 %             |
| 45Sc (KED)  | 140.178 %             | 2.2 %             |
| 51V (KED)   | 0.138 ppb             | 5.8 %             |
| 52Cr (KED)  | 1.236 ppb             | 3.8 %             |
| 55Mn (KED)  | 2.406 ppb             | 0.5 %             |
| 56Fe (KED)  | 84.201 ppb            | 2.2 %             |
| 58Ni (KED)  | 0.624 ppb             | 4.6 %             |
| 59Co (KED)  | 0.056 ppb             | 4.8 %             |
| 63Cu (KED)  | 2.642 ppb             | 1.1 %             |
| 64Zn (KED)  | 56.675 ppb            | 1.1 %             |
| 69Ga (KED)  | 0.494 ppb             | 3.2 %             |
| 75As (KED)  | 0.071 ppb             | 10.4 %            |
| 80Se (KED)  | 0.211 ppb             | 17.2 %            |
| 85Rb (KED)  | 0.698 ppb             | 2.9 %             |
| 88Sr (KED)  | 3.204 ppb             | 5.0 %             |
| 89Y (KED)   | 134.006 %             | 2.1 %             |
| 107Ag (KED) | 0.010 ppb             | 2.6 %             |
| 114Cd (KED) | 0.007 ppb             | 26.1 %            |
| 115In (KED) | 127.567 %             | 0.9 %             |
| 133Cs (KED) | 0.012 ppb             | 5.7 %             |
| 138Ba (KED) | 1.690 ppb             | 2.6 %             |
| 139La (KED) | 0.084 ppb             | 3.8 %             |
| 140Ce (KED) | 0.172 ppb             | 4.9 %             |
| 141Pr (KED) | 0.021 ppb             | 4.4 %             |
| 142Nd (KED) | 0.111 ppb             | 5.2 %             |
| 152Sm (KED) | 0.013 ppb             | 4.2 %             |
| 153Eu (KED) | 0.003 ppb             | 9.3 %             |
| 158Gd (KED) | 0.012 ppb             | 4.3 %             |
| 159Tb (KED) | 131.262 %             | 2.9 %             |
| 164Dy (KED) | 0.007 ppb             | 11.8 %            |
| 166Er (KED) | 0.000 ppb             | 435.2 %           |
| 169Tm (KED) | 0.001 ppb             | 5.1 %             |
| 174Yb (KED) | 0.003 ppb             | 8.6 %             |
| 175Lu (KED) | -0.109 ppb            | 5.2 %             |
| 205Tl (KED) | 0.003 ppb             | 8.1 %             |
| 208Pb (KED) | 0.238 ppb             | 2.1 %             |
| 209Bi (KED) | 118.338 %             | 0.9 %             |
| 232Th (KED) | 0.018 ppb             | 2.5 %             |
| 238U (KED)  | 0.006 ppb             | 4.1 %             |

| Category   | Concentration average | Intensity average | Intensity RSD |
|------------|-----------------------|-------------------|---------------|
| 6Li (KED)  | 132.930 %             | 3,522 cps         | 3.6 %         |
| 9Be (KED)  | -0.001 ppb            | 1 cps             | 173.2 %       |
| 11B (KED)  | 6.438 ppb             | 1,069 cps         | 4.8 %         |
| 24Mg (KED) | 120.115 ppb           | 78,052 cps        | 1.0 %         |
| 27Al (KED) | 72.924 ppb            | 12,130 cps        | 1.7 %         |

# Comprehensive

10/20/2021 6:11:31 PM

| Category    | Concentration average | Intensity average | Intensity RSD |
|-------------|-----------------------|-------------------|---------------|
| 45Sc (KED)  | 140.178 %             | 55,387 cps        | 2.2 %         |
| 51V (KED)   | 0.138 ppb             | 1,355 cps         | 7.5 %         |
| 52Cr (KED)  | 1.236 ppb             | 19,075 cps        | 5.9 %         |
| 55Mn (KED)  | 2.406 ppb             | 19,078 cps        | 2.4 %         |
| 56Fe (KED)  | 84.201 ppb            | 1,203,426 cps     | 0.4 %         |
| 58Ni (KED)  | 0.624 ppb             | 12,150 cps        | 2.2 %         |
| 59Co (KED)  | 0.056 ppb             | 1,771 cps         | 4.3 %         |
| 63Cu (KED)  | 2.642 ppb             | 61,222 cps        | 1.0 %         |
| 64Zn (KED)  | 56.675 ppb            | 396,932 cps       | 1.8 %         |
| 69Ga (KED)  | 0.494 ppb             | 3,814 cps         | 3.2 %         |
| 75As (KED)  | 0.071 ppb             | 158 cps           | 8.0 %         |
| 80Se (KED)  | 0.211 ppb             | 1,397 cps         | 0.4 %         |
| 85Rb (KED)  | 0.698 ppb             | 4,826 cps         | 2.5 %         |
| 88Sr (KED)  | 3.204 ppb             | 31,240 cps        | 2.9 %         |
| 89Y (KED)   | 134.006 %             | 492,275 cps       | 2.1 %         |
| 107Ag (KED) | 0.010 ppb             | 624 cps           | 3.5 %         |
| 114Cd (KED) | 0.007 ppb             | 216 cps           | 18.9 %        |
| 115In (KED) | 127.567 %             | 887,377 cps       | 0.9 %         |
| 133Cs (KED) | 0.012 ppb             | 409 cps           | 4.5 %         |
| 138Ba (KED) | 1.690 ppb             | 79,102 cps        | 0.3 %         |
| 139La (KED) | 0.084 ppb             | 8,341 cps         | 1.0 %         |
| 140Ce (KED) | 0.172 ppb             | 22,951 cps        | 3.6 %         |
| 141Pr (KED) | 0.021 ppb             | 2,938 cps         | 1.7 %         |
| 142Nd (KED) | 0.111 ppb             | 6,232 cps         | 3.3 %         |
| 152Sm (KED) | 0.013 ppb             | 674 cps           | 1.7 %         |
| 153Eu (KED) | 0.003 ppb             | 270 cps           | 6.4 %         |
| 158Gd (KED) | 0.012 ppb             | 801 cps           | 3.7 %         |
| 159Tb (KED) | 131.262 %             | 4,677,928 cps     | 2.9 %         |
| 164Dy (KED) | 0.007 ppb             | 563 cps           | 8.6 %         |
| 166Er (KED) | 0.000 ppb             | 560 cps           | 9.8 %         |
| 169Tm (KED) | 0.001 ppb             | 166 cps           | 5.1 %         |
| 174Yb (KED) | 0.003 ppb             | 350 cps           | 6.2 %         |
| 175Lu (KED) | -0.109 ppb            | 17,798 cps        | 3.7 %         |
| 205Tl (KED) | 0.003 ppb             | 584 cps           | 8.3 %         |
| 208Pb (KED) | 0.238 ppb             | 38,983 cps        | 2.3 %         |
| 209Bi (KED) | 118.338 %             | 3,772,313 cps     | 0.9 %         |
| 232Th (KED) | 0.018 ppb             | 5,054 cps         | 1.9 %         |
| 238U (KED)  | 0.006 ppb             | 2,077 cps         | 4.4 %         |

# Comprehensive

10/20/2021 6:11:31 PM

## Sample Summary

Instrument ID: iCAP Q

Analysis index: 28

Analysis name: 03273jian

Analysis started at: 10/20/2021 5:23:00 PM

User name: WINDOWS-UPCI4ER\Administrator

| Category    | Concentration average | Concentration RSD |
|-------------|-----------------------|-------------------|
| 6Li (KED)   | 137.839 %             | 4.5 %             |
| 9Be (KED)   | -0.001 ppb            | 685.1 %           |
| 11B (KED)   | 8.233 ppb             | 11.4 %            |
| 24Mg (KED)  | 136.389 ppb           | 4.5 %             |
| 27Al (KED)  | 67.091 ppb            | 0.6 %             |
| 45Sc (KED)  | 145.426 %             | 2.5 %             |
| 51V (KED)   | 0.135 ppb             | 0.5 %             |
| 52Cr (KED)  | 0.354 ppb             | 2.9 %             |
| 55Mn (KED)  | 2.472 ppb             | 2.2 %             |
| 56Fe (KED)  | 78.512 ppb            | 2.9 %             |
| 58Ni (KED)  | 0.469 ppb             | 3.1 %             |
| 59Co (KED)  | 0.045 ppb             | 7.2 %             |
| 63Cu (KED)  | 2.152 ppb             | 2.4 %             |
| 64Zn (KED)  | 46.135 ppb            | 2.1 %             |
| 69Ga (KED)  | 0.433 ppb             | 5.2 %             |
| 75As (KED)  | 0.098 ppb             | 10.3 %            |
| 80Se (KED)  | 0.195 ppb             | 6.1 %             |
| 85Rb (KED)  | 0.608 ppb             | 3.5 %             |
| 88Sr (KED)  | 3.754 ppb             | 1.4 %             |
| 89Y (KED)   | 138.041 %             | 2.0 %             |
| 107Ag (KED) | 0.009 ppb             | 11.2 %            |
| 114Cd (KED) | 0.009 ppb             | 2.1 %             |
| 115In (KED) | 132.531 %             | 1.7 %             |
| 133Cs (KED) | 0.010 ppb             | 7.6 %             |
| 138Ba (KED) | 1.528 ppb             | 0.9 %             |
| 139La (KED) | 0.082 ppb             | 1.7 %             |
| 140Ce (KED) | 0.177 ppb             | 2.0 %             |
| 141Pr (KED) | 0.018 ppb             | 1.0 %             |
| 142Nd (KED) | 0.102 ppb             | 2.2 %             |
| 152Sm (KED) | 0.012 ppb             | 11.4 %            |
| 153Eu (KED) | 0.002 ppb             | 4.4 %             |
| 158Gd (KED) | 0.010 ppb             | 1.0 %             |
| 159Tb (KED) | 137.909 %             | 0.5 %             |
| 164Dy (KED) | 0.007 ppb             | 9.8 %             |
| 166Er (KED) | 0.000 ppb             | 80.8 %            |
| 169Tm (KED) | 0.000 ppb             | 8.5 %             |
| 174Yb (KED) | 0.003 ppb             | 22.5 %            |
| 175Lu (KED) | -0.113 ppb            | 4.8 %             |
| 205Tl (KED) | 0.003 ppb             | 10.2 %            |
| 208Pb (KED) | 0.218 ppb             | 1.2 %             |
| 209Bi (KED) | 123.025 %             | 1.0 %             |
| 232Th (KED) | 0.019 ppb             | 4.3 %             |
| 238U (KED)  | 0.005 ppb             | 4.7 %             |

| Category   | Concentration average | Intensity average | Intensity RSD |
|------------|-----------------------|-------------------|---------------|
| 6Li (KED)  | 137.839 %             | 3,652 cps         | 4.5 %         |
| 9Be (KED)  | -0.001 ppb            | 1 cps             | 173.2 %       |
| 11B (KED)  | 8.233 ppb             | 1,305 cps         | 3.2 %         |
| 24Mg (KED) | 136.389 ppb           | 91,859 cps        | 1.1 %         |
| 27Al (KED) | 67.091 ppb            | 11,588 cps        | 2.5 %         |

# Comprehensive

10/20/2021 6:11:31 PM

| Category    | Concentration average | Intensity average | Intensity RSD |
|-------------|-----------------------|-------------------|---------------|
| 45Sc (KED)  | 145.426 %             | 57,461 cps        | 2.5 %         |
| 51V (KED)   | 0.135 ppb             | 1,373 cps         | 2.6 %         |
| 52Cr (KED)  | 0.354 ppb             | 5,717 cps         | 4.0 %         |
| 55Mn (KED)  | 2.472 ppb             | 20,332 cps        | 1.3 %         |
| 56Fe (KED)  | 78.512 ppb            | 1,164,087 cps     | 0.3 %         |
| 58Ni (KED)  | 0.469 ppb             | 9,585 cps         | 0.6 %         |
| 59Co (KED)  | 0.045 ppb             | 1,460 cps         | 5.3 %         |
| 63Cu (KED)  | 2.152 ppb             | 51,541 cps        | 0.5 %         |
| 64Zn (KED)  | 46.135 ppb            | 332,991 cps       | 0.1 %         |
| 69Ga (KED)  | 0.433 ppb             | 3,458 cps         | 3.0 %         |
| 75As (KED)  | 0.098 ppb             | 216 cps           | 9.3 %         |
| 80Se (KED)  | 0.195 ppb             | 1,429 cps         | 2.4 %         |
| 85Rb (KED)  | 0.608 ppb             | 4,333 cps         | 3.8 %         |
| 88Sr (KED)  | 3.754 ppb             | 37,681 cps        | 1.5 %         |
| 89Y (KED)   | 138.041 %             | 507,099 cps       | 2.0 %         |
| 107Ag (KED) | 0.009 ppb             | 600 cps           | 9.5 %         |
| 114Cd (KED) | 0.009 ppb             | 281 cps           | 3.0 %         |
| 115In (KED) | 132.531 %             | 921,912 cps       | 1.7 %         |
| 133Cs (KED) | 0.010 ppb             | 371 cps           | 6.7 %         |
| 138Ba (KED) | 1.528 ppb             | 75,330 cps        | 1.4 %         |
| 139La (KED) | 0.082 ppb             | 8,604 cps         | 1.2 %         |
| 140Ce (KED) | 0.177 ppb             | 24,802 cps        | 2.4 %         |
| 141Pr (KED) | 0.018 ppb             | 2,703 cps         | 1.2 %         |
| 142Nd (KED) | 0.102 ppb             | 6,053 cps         | 2.6 %         |
| 152Sm (KED) | 0.012 ppb             | 653 cps           | 11.9 %        |
| 153Eu (KED) | 0.002 ppb             | 257 cps           | 3.9 %         |
| 158Gd (KED) | 0.010 ppb             | 710 cps           | 0.9 %         |
| 159Tb (KED) | 137.909 %             | 4,914,822 cps     | 0.5 %         |
| 164Dy (KED) | 0.007 ppb             | 586 cps           | 9.8 %         |
| 166Er (KED) | 0.000 ppb             | 647 cps           | 4.5 %         |
| 169Tm (KED) | 0.000 ppb             | 166 cps           | 8.4 %         |
| 174Yb (KED) | 0.003 ppb             | 381 cps           | 20.6 %        |
| 175Lu (KED) | -0.113 ppb            | 18,121 cps        | 6.1 %         |
| 205Tl (KED) | 0.003 ppb             | 607 cps           | 11.0 %        |
| 208Pb (KED) | 0.218 ppb             | 37,544 cps        | 1.2 %         |
| 209Bi (KED) | 123.025 %             | 3,921,714 cps     | 1.0 %         |
| 232Th (KED) | 0.019 ppb             | 5,500 cps         | 3.5 %         |
| 238U (KED)  | 0.005 ppb             | 1,819 cps         | 4.2 %         |

# Comprehensive

10/20/2021 6:11:31 PM

## Sample Summary

Instrument ID: iCAP Q

Analysis index: 29

Analysis name: 00025jian

Analysis started at: 10/20/2021 5:26:16 PM

User name: WINDOWS-UPCI4ER\Administrator

| Category    | Concentration average | Concentration RSD |
|-------------|-----------------------|-------------------|
| 6Li (KED)   | 132.678 %             | 1.8 %             |
| 9Be (KED)   | 0.010 ppb             | 165.0 %           |
| 11B (KED)   | 18.859 ppb            | 6.8 %             |
| 24Mg (KED)  | 175.581 ppb           | 0.6 %             |
| 27Al (KED)  | 94.037 ppb            | 1.6 %             |
| 45Sc (KED)  | 143.121 %             | 0.7 %             |
| 51V (KED)   | 0.172 ppb             | 6.0 %             |
| 52Cr (KED)  | 0.500 ppb             | 2.6 %             |
| 55Mn (KED)  | 3.156 ppb             | 3.0 %             |
| 56Fe (KED)  | 104.235 ppb           | 2.4 %             |
| 58Ni (KED)  | 0.666 ppb             | 4.0 %             |
| 59Co (KED)  | 0.059 ppb             | 3.5 %             |
| 63Cu (KED)  | 2.228 ppb             | 1.8 %             |
| 64Zn (KED)  | 45.369 ppb            | 2.0 %             |
| 69Ga (KED)  | 0.620 ppb             | 4.7 %             |
| 75As (KED)  | 0.087 ppb             | 12.0 %            |
| 80Se (KED)  | 0.232 ppb             | 64.5 %            |
| 85Rb (KED)  | 0.694 ppb             | 3.5 %             |
| 88Sr (KED)  | 4.806 ppb             | 1.7 %             |
| 89Y (KED)   | 136.320 %             | 1.8 %             |
| 107Ag (KED) | 0.013 ppb             | 7.4 %             |
| 114Cd (KED) | 0.010 ppb             | 3.0 %             |
| 115In (KED) | 129.376 %             | 1.2 %             |
| 133Cs (KED) | 0.014 ppb             | 8.3 %             |
| 138Ba (KED) | 2.047 ppb             | 0.5 %             |
| 139La (KED) | 0.099 ppb             | 2.3 %             |
| 140Ce (KED) | 0.207 ppb             | 1.5 %             |
| 141Pr (KED) | 0.023 ppb             | 2.3 %             |
| 142Nd (KED) | 0.128 ppb             | 1.5 %             |
| 152Sm (KED) | 0.016 ppb             | 6.7 %             |
| 153Eu (KED) | 0.003 ppb             | 5.4 %             |
| 158Gd (KED) | 0.014 ppb             | 4.5 %             |
| 159Tb (KED) | 136.866 %             | 2.0 %             |
| 164Dy (KED) | 0.010 ppb             | 2.2 %             |
| 166Er (KED) | 0.001 ppb             | 87.7 %            |
| 169Tm (KED) | 0.001 ppb             | 13.8 %            |
| 174Yb (KED) | 0.004 ppb             | 8.7 %             |
| 175Lu (KED) | -0.116 ppb            | 2.7 %             |
| 205Tl (KED) | 0.003 ppb             | 2.3 %             |
| 208Pb (KED) | 0.254 ppb             | 1.5 %             |
| 209Bi (KED) | 121.103 %             | 1.9 %             |
| 232Th (KED) | 0.024 ppb             | 3.5 %             |
| 238U (KED)  | 0.007 ppb             | 3.5 %             |

| Category   | Concentration average | Intensity average | Intensity RSD |
|------------|-----------------------|-------------------|---------------|
| 6Li (KED)  | 132.678 %             | 3,515 cps         | 1.8 %         |
| 9Be (KED)  | 0.010 ppb             | 3 cps             | 100.0 %       |
| 11B (KED)  | 18.859 ppb            | 2,380 cps         | 4.0 %         |
| 24Mg (KED) | 175.581 ppb           | 113,944 cps       | 1.9 %         |
| 27Al (KED) | 94.037 ppb            | 15,940 cps        | 1.8 %         |

# Comprehensive

10/20/2021 6:11:31 PM

| Category    | Concentration average | Intensity average | Intensity RSD |
|-------------|-----------------------|-------------------|---------------|
| 45Sc (KED)  | 143.121 %             | 56,550 cps        | 0.7 %         |
| 51V (KED)   | 0.172 ppb             | 1,720 cps         | 5.6 %         |
| 52Cr (KED)  | 0.500 ppb             | 7,919 cps         | 3.1 %         |
| 55Mn (KED)  | 3.156 ppb             | 25,533 cps        | 2.8 %         |
| 56Fe (KED)  | 104.235 ppb           | 1,520,845 cps     | 2.1 %         |
| 58Ni (KED)  | 0.666 ppb             | 13,224 cps        | 3.3 %         |
| 59Co (KED)  | 0.059 ppb             | 1,909 cps         | 3.3 %         |
| 63Cu (KED)  | 2.228 ppb             | 52,681 cps        | 2.2 %         |
| 64Zn (KED)  | 45.369 ppb            | 323,420 cps       | 1.1 %         |
| 69Ga (KED)  | 0.620 ppb             | 4,843 cps         | 3.4 %         |
| 75As (KED)  | 0.087 ppb             | 191 cps           | 10.5 %        |
| 80Se (KED)  | 0.232 ppb             | 1,435 cps         | 5.5 %         |
| 85Rb (KED)  | 0.694 ppb             | 4,881 cps         | 1.7 %         |
| 88Sr (KED)  | 4.806 ppb             | 47,568 cps        | 0.1 %         |
| 89Y (KED)   | 136.320 %             | 500,775 cps       | 1.8 %         |
| 107Ag (KED) | 0.013 ppb             | 818 cps           | 6.5 %         |
| 114Cd (KED) | 0.010 ppb             | 298 cps           | 1.3 %         |
| 115In (KED) | 129.376 %             | 899,962 cps       | 1.2 %         |
| 133Cs (KED) | 0.014 ppb             | 476 cps           | 7.4 %         |
| 138Ba (KED) | 2.047 ppb             | 99,511 cps        | 2.0 %         |
| 139La (KED) | 0.099 ppb             | 10,301 cps        | 1.1 %         |
| 140Ce (KED) | 0.207 ppb             | 28,873 cps        | 2.2 %         |
| 141Pr (KED) | 0.023 ppb             | 3,358 cps         | 0.5 %         |
| 142Nd (KED) | 0.128 ppb             | 7,514 cps         | 3.0 %         |
| 152Sm (KED) | 0.016 ppb             | 851 cps           | 7.3 %         |
| 153Eu (KED) | 0.003 ppb             | 356 cps           | 7.2 %         |
| 158Gd (KED) | 0.014 ppb             | 1,011 cps         | 5.3 %         |
| 159Tb (KED) | 136.866 %             | 4,877,648 cps     | 2.0 %         |
| 164Dy (KED) | 0.010 ppb             | 836 cps           | 4.1 %         |
| 166Er (KED) | 0.001 ppb             | 672 cps           | 8.4 %         |
| 169Tm (KED) | 0.001 ppb             | 267 cps           | 15.2 %        |
| 174Yb (KED) | 0.004 ppb             | 439 cps           | 8.1 %         |
| 175Lu (KED) | -0.116 ppb            | 17,293 cps        | 1.5 %         |
| 205Tl (KED) | 0.003 ppb             | 533 cps           | 3.9 %         |
| 208Pb (KED) | 0.254 ppb             | 42,112 cps        | 2.2 %         |
| 209Bi (KED) | 121.103 %             | 3,860,449 cps     | 1.9 %         |
| 232Th (KED) | 0.024 ppb             | 6,702 cps         | 2.1 %         |
| 238U (KED)  | 0.007 ppb             | 2,525 cps         | 4.1 %         |

# Comprehensive

10/20/2021 6:11:31 PM

## Sample Summary

Instrument ID: iCAP Q

Analysis index: 30

Analysis name: 03049jian

Analysis started at: 10/20/2021 5:29:26 PM

User name: WINDOWS-UPCI4ER\Administrator

| Category    | Concentration average | Concentration RSD |
|-------------|-----------------------|-------------------|
| 6Li (KED)   | 138.971 %             | 1.5 %             |
| 9Be (KED)   | 0.004 ppb             | 225.4 %           |
| 11B (KED)   | 21.365 ppb            | 2.6 %             |
| 24Mg (KED)  | 186.110 ppb           | 2.0 %             |
| 27Al (KED)  | 108.451 ppb           | 0.3 %             |
| 45Sc (KED)  | 146.963 %             | 1.9 %             |
| 51V (KED)   | 0.210 ppb             | 4.9 %             |
| 52Cr (KED)  | 0.945 ppb             | 2.5 %             |
| 55Mn (KED)  | 3.803 ppb             | 0.7 %             |
| 56Fe (KED)  | 129.682 ppb           | 0.8 %             |
| 58Ni (KED)  | 0.738 ppb             | 2.6 %             |
| 59Co (KED)  | 0.064 ppb             | 7.7 %             |
| 63Cu (KED)  | 2.714 ppb             | 1.8 %             |
| 64Zn (KED)  | 46.940 ppb            | 0.9 %             |
| 69Ga (KED)  | 0.671 ppb             | 3.3 %             |
| 75As (KED)  | 0.114 ppb             | 14.8 %            |
| 80Se (KED)  | 0.145 ppb             | 58.6 %            |
| 85Rb (KED)  | 0.609 ppb             | 2.5 %             |
| 88Sr (KED)  | 3.948 ppb             | 0.5 %             |
| 89Y (KED)   | 139.827 %             | 1.0 %             |
| 107Ag (KED) | 0.084 ppb             | 2.3 %             |
| 114Cd (KED) | 0.011 ppb             | 13.3 %            |
| 115In (KED) | 130.460 %             | 1.3 %             |
| 133Cs (KED) | 0.016 ppb             | 17.5 %            |
| 138Ba (KED) | 2.285 ppb             | 1.6 %             |
| 139La (KED) | 0.120 ppb             | 0.6 %             |
| 140Ce (KED) | 0.363 ppb             | 1.1 %             |
| 141Pr (KED) | 0.030 ppb             | 1.9 %             |
| 142Nd (KED) | 0.193 ppb             | 2.7 %             |
| 152Sm (KED) | 0.018 ppb             | 3.2 %             |
| 153Eu (KED) | 0.004 ppb             | 9.4 %             |
| 158Gd (KED) | 0.018 ppb             | 12.2 %            |
| 159Tb (KED) | 138.643 %             | 0.7 %             |
| 164Dy (KED) | 0.012 ppb             | 2.3 %             |
| 166Er (KED) | 0.006 ppb             | 15.9 %            |
| 169Tm (KED) | 0.001 ppb             | 16.5 %            |
| 174Yb (KED) | 0.005 ppb             | 0.9 %             |
| 175Lu (KED) | -0.112 ppb            | 2.6 %             |
| 205Tl (KED) | 0.002 ppb             | 12.3 %            |
| 208Pb (KED) | 0.429 ppb             | 2.3 %             |
| 209Bi (KED) | 122.418 %             | 1.3 %             |
| 232Th (KED) | 0.032 ppb             | 1.8 %             |
| 238U (KED)  | 0.009 ppb             | 3.4 %             |

| Category   | Concentration average | Intensity average | Intensity RSD |
|------------|-----------------------|-------------------|---------------|
| 6Li (KED)  | 138.971 %             | 3,682 cps         | 1.5 %         |
| 9Be (KED)  | 0.004 ppb             | 2 cps             | 86.6 %        |
| 11B (KED)  | 21.365 ppb            | 2,773 cps         | 3.5 %         |
| 24Mg (KED) | 186.110 ppb           | 126,476 cps       | 1.0 %         |
| 27Al (KED) | 108.451 ppb           | 18,860 cps        | 2.1 %         |

# Comprehensive

10/20/2021 6:11:31 PM

| Category    | Concentration average | Intensity average | Intensity RSD |
|-------------|-----------------------|-------------------|---------------|
| 45Sc (KED)  | 146.963 %             | 58,068 cps        | 1.9 %         |
| 51V (KED)   | 0.210 ppb             | 2,155 cps         | 6.5 %         |
| 52Cr (KED)  | 0.945 ppb             | 15,298 cps        | 4.3 %         |
| 55Mn (KED)  | 3.803 ppb             | 31,580 cps        | 1.6 %         |
| 56Fe (KED)  | 129.682 ppb           | 1,942,327 cps     | 1.5 %         |
| 58Ni (KED)  | 0.738 ppb             | 14,990 cps        | 0.6 %         |
| 59Co (KED)  | 0.064 ppb             | 2,115 cps         | 9.4 %         |
| 63Cu (KED)  | 2.714 ppb             | 65,619 cps        | 2.3 %         |
| 64Zn (KED)  | 46.940 ppb            | 343,282 cps       | 1.9 %         |
| 69Ga (KED)  | 0.671 ppb             | 5,378 cps         | 3.3 %         |
| 75As (KED)  | 0.114 ppb             | 250 cps           | 13.9 %        |
| 80Se (KED)  | 0.145 ppb             | 1,413 cps         | 4.5 %         |
| 85Rb (KED)  | 0.609 ppb             | 4,402 cps         | 3.3 %         |
| 88Sr (KED)  | 3.948 ppb             | 40,134 cps        | 1.3 %         |
| 89Y (KED)   | 139.827 %             | 513,660 cps       | 1.0 %         |
| 107Ag (KED) | 0.084 ppb             | 5,197 cps         | 3.1 %         |
| 114Cd (KED) | 0.011 ppb             | 328 cps           | 9.7 %         |
| 115In (KED) | 130.460 %             | 907,502 cps       | 1.3 %         |
| 133Cs (KED) | 0.016 ppb             | 546 cps           | 16.3 %        |
| 138Ba (KED) | 2.285 ppb             | 112,325 cps       | 1.4 %         |
| 139La (KED) | 0.120 ppb             | 12,628 cps        | 1.3 %         |
| 140Ce (KED) | 0.363 ppb             | 51,098 cps        | 1.7 %         |
| 141Pr (KED) | 0.030 ppb             | 4,399 cps         | 1.8 %         |
| 142Nd (KED) | 0.193 ppb             | 11,459 cps        | 2.1 %         |
| 152Sm (KED) | 0.018 ppb             | 983 cps           | 3.9 %         |
| 153Eu (KED) | 0.004 ppb             | 404 cps           | 9.8 %         |
| 158Gd (KED) | 0.018 ppb             | 1,283 cps         | 12.8 %        |
| 159Tb (KED) | 138.643 %             | 4,940,961 cps     | 0.7 %         |
| 164Dy (KED) | 0.012 ppb             | 984 cps           | 1.7 %         |
| 166Er (KED) | 0.006 ppb             | 1,215 cps         | 7.8 %         |
| 169Tm (KED) | 0.001 ppb             | 238 cps           | 15.4 %        |
| 174Yb (KED) | 0.005 ppb             | 569 cps           | 1.5 %         |
| 175Lu (KED) | -0.112 ppb            | 18,348 cps        | 3.3 %         |
| 205Tl (KED) | 0.002 ppb             | 506 cps           | 12.9 %        |
| 208Pb (KED) | 0.429 ppb             | 67,997 cps        | 3.4 %         |
| 209Bi (KED) | 122.418 %             | 3,902,374 cps     | 1.3 %         |
| 232Th (KED) | 0.032 ppb             | 8,942 cps         | 1.2 %         |
| 238U (KED)  | 0.009 ppb             | 3,217 cps         | 4.0 %         |

# Comprehensive

10/20/2021 6:11:31 PM

## Sample Summary

Instrument ID: iCAP Q

Analysis index: 31

Analysis name: 30013jian

Analysis started at: 10/20/2021 5:32:41 PM

User name: WINDOWS-UPCI4ER\Administrator

| Category    | Concentration average | Concentration RSD |
|-------------|-----------------------|-------------------|
| 6Li (KED)   | 130.119 %             |                   |
| 9Be (KED)   | -0.007 ppb            |                   |
| 11B (KED)   | 7.902 ppb             |                   |
| 24Mg (KED)  | 230.791 ppb           |                   |
| 27Al (KED)  | 194.676 ppb           |                   |
| 45Sc (KED)  | 146.505 %             |                   |
| 51V (KED)   | 0.383 ppb             |                   |
| 52Cr (KED)  | 0.957 ppb             |                   |
| 55Mn (KED)  | 5.765 ppb             |                   |
| 56Fe (KED)  | 209.380 ppb           |                   |
| 58Ni (KED)  | 1.068 ppb             |                   |
| 59Co (KED)  | 0.094 ppb             |                   |
| 63Cu (KED)  | 2.334 ppb             |                   |
| 64Zn (KED)  | 55.855 ppb            |                   |
| 69Ga (KED)  | 0.849 ppb             |                   |
| 75As (KED)  | 0.165 ppb             |                   |
| 80Se (KED)  | 0.039 ppb             |                   |
| 85Rb (KED)  | 0.831 ppb             |                   |
| 88Sr (KED)  | 4.294 ppb             |                   |
| 89Y (KED)   | 140.454 %             |                   |
| 107Ag (KED) | 0.022 ppb             |                   |
| 114Cd (KED) | 0.010 ppb             |                   |
| 115In (KED) | 130.765 %             |                   |
| 133Cs (KED) | 0.029 ppb             |                   |
| 138Ba (KED) | 2.877 ppb             |                   |
| 139La (KED) | 0.214 ppb             |                   |
| 140Ce (KED) | 0.465 ppb             |                   |
| 141Pr (KED) | 0.050 ppb             |                   |
| 142Nd (KED) | 0.289 ppb             |                   |
| 152Sm (KED) | 0.037 ppb             |                   |
| 153Eu (KED) | 0.007 ppb             |                   |
| 158Gd (KED) | 0.029 ppb             |                   |
| 159Tb (KED) | 140.887 %             |                   |
| 164Dy (KED) | 0.020 ppb             |                   |
| 166Er (KED) | 0.007 ppb             |                   |
| 169Tm (KED) | 0.001 ppb             |                   |
| 174Yb (KED) | 0.007 ppb             |                   |
| 175Lu (KED) | -0.111 ppb            |                   |
| 205Tl (KED) | 0.003 ppb             |                   |
| 208Pb (KED) | 0.399 ppb             |                   |
| 209Bi (KED) | 121.962 %             |                   |
| 232Th (KED) | 0.054 ppb             |                   |
| 238U (KED)  | 0.012 ppb             |                   |

| Category   | Concentration average | Intensity average | Intensity RSD |
|------------|-----------------------|-------------------|---------------|
| 6Li (KED)  | 130.119 %             | 3,447 cps         |               |
| 9Be (KED)  | -0.007 ppb            | 0 cps             |               |
| 11B (KED)  | 7.902 ppb             | 1,200 cps         |               |
| 24Mg (KED) | 230.791 ppb           | 146,848 cps       |               |
| 27Al (KED) | 194.676 ppb           | 33,659 cps        |               |

# Comprehensive

10/20/2021 6:11:31 PM

| Category    | Concentration average | Intensity average | Intensity RSD |
|-------------|-----------------------|-------------------|---------------|
| 45Sc (KED)  | 146.505 %             | 57,887 cps        |               |
| 51V (KED)   | 0.383 ppb             | 3,914 cps         |               |
| 52Cr (KED)  | 0.957 ppb             | 15,443 cps        |               |
| 55Mn (KED)  | 5.765 ppb             | 47,704 cps        |               |
| 56Fe (KED)  | 209.380 ppb           | 3,124,963 cps     |               |
| 58Ni (KED)  | 1.068 ppb             | 21,458 cps        |               |
| 59Co (KED)  | 0.094 ppb             | 3,054 cps         |               |
| 63Cu (KED)  | 2.334 ppb             | 56,806 cps        |               |
| 64Zn (KED)  | 55.855 ppb            | 410,064 cps       |               |
| 69Ga (KED)  | 0.849 ppb             | 6,805 cps         |               |
| 75As (KED)  | 0.165 ppb             | 353 cps           |               |
| 80Se (KED)  | 0.039 ppb             | 1,347 cps         |               |
| 85Rb (KED)  | 0.831 ppb             | 6,021 cps         |               |
| 88Sr (KED)  | 4.294 ppb             | 43,823 cps        |               |
| 89Y (KED)   | 140.454 %             | 515,963 cps       |               |
| 107Ag (KED) | 0.022 ppb             | 1,377 cps         |               |
| 114Cd (KED) | 0.010 ppb             | 290 cps           |               |
| 115In (KED) | 130.765 %             | 909,622 cps       |               |
| 133Cs (KED) | 0.029 ppb             | 1,003 cps         |               |
| 138Ba (KED) | 2.877 ppb             | 143,207 cps       |               |
| 139La (KED) | 0.214 ppb             | 22,941 cps        |               |
| 140Ce (KED) | 0.465 ppb             | 66,510 cps        |               |
| 141Pr (KED) | 0.050 ppb             | 7,612 cps         |               |
| 142Nd (KED) | 0.289 ppb             | 17,439 cps        |               |
| 152Sm (KED) | 0.037 ppb             | 1,987 cps         |               |
| 153Eu (KED) | 0.007 ppb             | 760 cps           |               |
| 158Gd (KED) | 0.029 ppb             | 2,104 cps         |               |
| 159Tb (KED) | 140.887 %             | 5,020,928 cps     |               |
| 164Dy (KED) | 0.020 ppb             | 1,633 cps         |               |
| 166Er (KED) | 0.007 ppb             | 1,320 cps         |               |
| 169Tm (KED) | 0.001 ppb             | 457 cps           |               |
| 174Yb (KED) | 0.007 ppb             | 850 cps           |               |
| 175Lu (KED) | -0.111 ppb            | 18,781 cps        |               |
| 205Tl (KED) | 0.003 ppb             | 593 cps           |               |
| 208Pb (KED) | 0.399 ppb             | 63,297 cps        |               |
| 209Bi (KED) | 121.962 %             | 3,887,832 cps     |               |
| 232Th (KED) | 0.054 ppb             | 15,032 cps        |               |
| 238U (KED)  | 0.012 ppb             | 4,111 cps         |               |

# Comprehensive

10/20/2021 6:11:31 PM

## Sample Summary

Instrument ID: iCAP Q

Analysis index: 32

Analysis name: 0078jian

Analysis started at: 10/20/2021 5:34:33 PM

User name: WINDOWS-UPCI4ER\Administrator

| Category    | Concentration average | Concentration RSD |
|-------------|-----------------------|-------------------|
| 6Li (KED)   | 130.245 %             |                   |
| 9Be (KED)   | 0.027 ppb             |                   |
| 11B (KED)   | 11.200 ppb            |                   |
| 24Mg (KED)  | 239.172 ppb           |                   |
| 27Al (KED)  | 125.595 ppb           |                   |
| 45Sc (KED)  | 139.607 %             |                   |
| 51V (KED)   | 0.247 ppb             |                   |
| 52Cr (KED)  | 0.407 ppb             |                   |
| 55Mn (KED)  | 3.787 ppb             |                   |
| 56Fe (KED)  | 137.195 ppb           |                   |
| 58Ni (KED)  | 0.835 ppb             |                   |
| 59Co (KED)  | 0.064 ppb             |                   |
| 63Cu (KED)  | 2.114 ppb             |                   |
| 64Zn (KED)  | 50.971 ppb            |                   |
| 69Ga (KED)  | 0.502 ppb             |                   |
| 75As (KED)  | 0.095 ppb             |                   |
| 80Se (KED)  | 0.228 ppb             |                   |
| 85Rb (KED)  | 0.699 ppb             |                   |
| 88Sr (KED)  | 3.265 ppb             |                   |
| 89Y (KED)   | 134.133 %             |                   |
| 107Ag (KED) | 0.011 ppb             |                   |
| 114Cd (KED) | 0.003 ppb             |                   |
| 115In (KED) | 126.921 %             |                   |
| 133Cs (KED) | 0.020 ppb             |                   |
| 138Ba (KED) | 1.858 ppb             |                   |
| 139La (KED) | 0.155 ppb             |                   |
| 140Ce (KED) | 0.391 ppb             |                   |
| 141Pr (KED) | 0.038 ppb             |                   |
| 142Nd (KED) | 0.208 ppb             |                   |
| 152Sm (KED) | 0.023 ppb             |                   |
| 153Eu (KED) | 0.004 ppb             |                   |
| 158Gd (KED) | 0.019 ppb             |                   |
| 159Tb (KED) | 126.956 %             |                   |
| 164Dy (KED) | 0.014 ppb             |                   |
| 166Er (KED) | 0.006 ppb             |                   |
| 169Tm (KED) | 0.001 ppb             |                   |
| 174Yb (KED) | 0.005 ppb             |                   |
| 175Lu (KED) | -0.105 ppb            |                   |
| 205Tl (KED) | 0.003 ppb             |                   |
| 208Pb (KED) | 0.275 ppb             |                   |
| 209Bi (KED) | 118.969 %             |                   |
| 232Th (KED) | 0.034 ppb             |                   |
| 238U (KED)  | 0.011 ppb             |                   |

| Category   | Concentration average | Intensity average | Intensity RSD |
|------------|-----------------------|-------------------|---------------|
| 6Li (KED)  | 130.245 %             | 3,450 cps         |               |
| 9Be (KED)  | 0.027 ppb             | 7 cps             |               |
| 11B (KED)  | 11.200 ppb            | 1,543 cps         |               |
| 24Mg (KED) | 239.172 ppb           | 152,324 cps       |               |
| 27Al (KED) | 125.595 ppb           | 20,731 cps        |               |

# Comprehensive

10/20/2021 6:11:31 PM

| Category    | Concentration average | Intensity average | Intensity RSD |
|-------------|-----------------------|-------------------|---------------|
| 45Sc (KED)  | 139.607 %             | 55,162 cps        |               |
| 51V (KED)   | 0.247 ppb             | 2,404 cps         |               |
| 52Cr (KED)  | 0.407 ppb             | 6,295 cps         |               |
| 55Mn (KED)  | 3.787 ppb             | 29,876 cps        |               |
| 56Fe (KED)  | 137.195 ppb           | 1,951,997 cps     |               |
| 58Ni (KED)  | 0.835 ppb             | 16,074 cps        |               |
| 59Co (KED)  | 0.064 ppb             | 2,003 cps         |               |
| 63Cu (KED)  | 2.114 ppb             | 49,227 cps        |               |
| 64Zn (KED)  | 50.971 ppb            | 357,469 cps       |               |
| 69Ga (KED)  | 0.502 ppb             | 3,877 cps         |               |
| 75As (KED)  | 0.095 ppb             | 203 cps           |               |
| 80Se (KED)  | 0.228 ppb             | 1,410 cps         |               |
| 85Rb (KED)  | 0.699 ppb             | 4,838 cps         |               |
| 88Sr (KED)  | 3.265 ppb             | 31,874 cps        |               |
| 89Y (KED)   | 134.133 %             | 492,745 cps       |               |
| 107Ag (KED) | 0.011 ppb             | 703 cps           |               |
| 114Cd (KED) | 0.003 ppb             | 127 cps           |               |
| 115In (KED) | 126.921 %             | 882,882 cps       |               |
| 133Cs (KED) | 0.020 ppb             | 663 cps           |               |
| 138Ba (KED) | 1.858 ppb             | 83,939 cps        |               |
| 139La (KED) | 0.155 ppb             | 14,942 cps        |               |
| 140Ce (KED) | 0.391 ppb             | 50,435 cps        |               |
| 141Pr (KED) | 0.038 ppb             | 5,138 cps         |               |
| 142Nd (KED) | 0.208 ppb             | 11,302 cps        |               |
| 152Sm (KED) | 0.023 ppb             | 1,100 cps         |               |
| 153Eu (KED) | 0.004 ppb             | 427 cps           |               |
| 158Gd (KED) | 0.019 ppb             | 1,273 cps         |               |
| 159Tb (KED) | 126.956 %             | 4,524,477 cps     |               |
| 164Dy (KED) | 0.014 ppb             | 1,070 cps         |               |
| 166Er (KED) | 0.006 ppb             | 1,100 cps         |               |
| 169Tm (KED) | 0.001 ppb             | 267 cps           |               |
| 174Yb (KED) | 0.005 ppb             | 567 cps           |               |
| 175Lu (KED) | -0.105 ppb            | 18,090 cps        |               |
| 205Tl (KED) | 0.003 ppb             | 617 cps           |               |
| 208Pb (KED) | 0.275 ppb             | 44,345 cps        |               |
| 209Bi (KED) | 118.969 %             | 3,792,418 cps     |               |
| 232Th (KED) | 0.034 ppb             | 9,400 cps         |               |
| 238U (KED)  | 0.011 ppb             | 3,697 cps         |               |

# Comprehensive

10/20/2021 6:11:31 PM

## Sample Summary

Instrument ID: iCAP Q

Analysis index: 33

Analysis name: 03045jian

Analysis started at: 10/20/2021 5:36:32 PM

User name: WINDOWS-UPCI4ER\Administrator

| Category    | Concentration average | Concentration RSD |
|-------------|-----------------------|-------------------|
| 6Li (KED)   | 129.490 %             |                   |
| 9Be (KED)   | -0.007 ppb            |                   |
| 11B (KED)   | 16.103 ppb            |                   |
| 24Mg (KED)  | 204.248 ppb           |                   |
| 27Al (KED)  | 139.252 ppb           |                   |
| 45Sc (KED)  | 139.920 %             |                   |
| 51V (KED)   | 0.251 ppb             |                   |
| 52Cr (KED)  | 0.413 ppb             |                   |
| 55Mn (KED)  | 4.098 ppb             |                   |
| 56Fe (KED)  | 155.705 ppb           |                   |
| 58Ni (KED)  | 0.997 ppb             |                   |
| 59Co (KED)  | 0.081 ppb             |                   |
| 63Cu (KED)  | 2.229 ppb             |                   |
| 64Zn (KED)  | 48.507 ppb            |                   |
| 69Ga (KED)  | 0.650 ppb             |                   |
| 75As (KED)  | 0.091 ppb             |                   |
| 80Se (KED)  | 0.212 ppb             |                   |
| 85Rb (KED)  | 0.659 ppb             |                   |
| 88Sr (KED)  | 4.361 ppb             |                   |
| 89Y (KED)   | 136.740 %             |                   |
| 107Ag (KED) | 0.013 ppb             |                   |
| 114Cd (KED) | 0.007 ppb             |                   |
| 115In (KED) | 129.330 %             |                   |
| 133Cs (KED) | 0.021 ppb             |                   |
| 138Ba (KED) | 2.185 ppb             |                   |
| 139La (KED) | 0.148 ppb             |                   |
| 140Ce (KED) | 0.398 ppb             |                   |
| 141Pr (KED) | 0.034 ppb             |                   |
| 142Nd (KED) | 0.221 ppb             |                   |
| 152Sm (KED) | 0.021 ppb             |                   |
| 153Eu (KED) | 0.005 ppb             |                   |
| 158Gd (KED) | 0.019 ppb             |                   |
| 159Tb (KED) | 138.914 %             |                   |
| 164Dy (KED) | 0.014 ppb             |                   |
| 166Er (KED) | 0.007 ppb             |                   |
| 169Tm (KED) | 0.001 ppb             |                   |
| 174Yb (KED) | 0.006 ppb             |                   |
| 175Lu (KED) | -0.111 ppb            |                   |
| 205Tl (KED) | 0.003 ppb             |                   |
| 208Pb (KED) | 0.260 ppb             |                   |
| 209Bi (KED) | 120.568 %             |                   |
| 232Th (KED) | 0.036 ppb             |                   |
| 238U (KED)  | 0.011 ppb             |                   |

| Category   | Concentration average | Intensity average | Intensity RSD |
|------------|-----------------------|-------------------|---------------|
| 6Li (KED)  | 129.490 %             | 3,430 cps         |               |
| 9Be (KED)  | -0.007 ppb            | 0 cps             |               |
| 11B (KED)  | 16.103 ppb            | 2,040 cps         |               |
| 24Mg (KED) | 204.248 ppb           | 129,343 cps       |               |
| 27Al (KED) | 139.252 ppb           | 23,025 cps        |               |

# Comprehensive

10/20/2021 6:11:31 PM

| Category    | Concentration average | Intensity average | Intensity RSD |
|-------------|-----------------------|-------------------|---------------|
| 45Sc (KED)  | 139.920 %             | 55,285 cps        |               |
| 51V (KED)   | 0.251 ppb             | 2,454 cps         |               |
| 52Cr (KED)  | 0.413 ppb             | 6,412 cps         |               |
| 55Mn (KED)  | 4.098 ppb             | 32,395 cps        |               |
| 56Fe (KED)  | 155.705 ppb           | 2,220,023 cps     |               |
| 58Ni (KED)  | 0.997 ppb             | 19,155 cps        |               |
| 59Co (KED)  | 0.081 ppb             | 2,530 cps         |               |
| 63Cu (KED)  | 2.229 ppb             | 52,862 cps        |               |
| 64Zn (KED)  | 48.507 ppb            | 346,853 cps       |               |
| 69Ga (KED)  | 0.650 ppb             | 5,098 cps         |               |
| 75As (KED)  | 0.091 ppb             | 200 cps           |               |
| 80Se (KED)  | 0.212 ppb             | 1,427 cps         |               |
| 85Rb (KED)  | 0.659 ppb             | 4,651 cps         |               |
| 88Sr (KED)  | 4.361 ppb             | 43,328 cps        |               |
| 89Y (KED)   | 136.740 %             | 502,321 cps       |               |
| 107Ag (KED) | 0.013 ppb             | 827 cps           |               |
| 114Cd (KED) | 0.007 ppb             | 227 cps           |               |
| 115In (KED) | 129.330 %             | 899,640 cps       |               |
| 133Cs (KED) | 0.021 ppb             | 710 cps           |               |
| 138Ba (KED) | 2.185 ppb             | 107,679 cps       |               |
| 139La (KED) | 0.148 ppb             | 15,580 cps        |               |
| 140Ce (KED) | 0.398 ppb             | 56,126 cps        |               |
| 141Pr (KED) | 0.034 ppb             | 5,084 cps         |               |
| 142Nd (KED) | 0.221 ppb             | 13,130 cps        |               |
| 152Sm (KED) | 0.021 ppb             | 1,147 cps         |               |
| 153Eu (KED) | 0.005 ppb             | 503 cps           |               |
| 158Gd (KED) | 0.019 ppb             | 1,350 cps         |               |
| 159Tb (KED) | 138.914 %             | 4,950,632 cps     |               |
| 164Dy (KED) | 0.014 ppb             | 1,163 cps         |               |
| 166Er (KED) | 0.007 ppb             | 1,283 cps         |               |
| 169Tm (KED) | 0.001 ppb             | 290 cps           |               |
| 174Yb (KED) | 0.006 ppb             | 700 cps           |               |
| 175Lu (KED) | -0.111 ppb            | 18,614 cps        |               |
| 205Tl (KED) | 0.003 ppb             | 640 cps           |               |
| 208Pb (KED) | 0.260 ppb             | 42,860 cps        |               |
| 209Bi (KED) | 120.568 %             | 3,843,405 cps     |               |
| 232Th (KED) | 0.036 ppb             | 9,971 cps         |               |
| 238U (KED)  | 0.011 ppb             | 3,671 cps         |               |

# Comprehensive

10/20/2021 6:11:31 PM

## Sample Summary

Instrument ID: iCAP Q

Analysis index: 34

Analysis name: 03263ti

Analysis started at: 10/20/2021 5:38:25 PM

User name: WINDOWS-UPCI4ER\Administrator

| Category    | Concentration average | Concentration RSD |
|-------------|-----------------------|-------------------|
| 6Li (KED)   | 131.000 %             |                   |
| 9Be (KED)   | -0.007 ppb            |                   |
| 11B (KED)   | 9.070 ppb             |                   |
| 24Mg (KED)  | 213.317 ppb           |                   |
| 27Al (KED)  | 211.249 ppb           |                   |
| 45Sc (KED)  | 137.421 %             |                   |
| 51V (KED)   | 0.423 ppb             |                   |
| 52Cr (KED)  | 0.604 ppb             |                   |
| 55Mn (KED)  | 5.159 ppb             |                   |
| 56Fe (KED)  | 237.510 ppb           |                   |
| 58Ni (KED)  | 1.159 ppb             |                   |
| 59Co (KED)  | 0.110 ppb             |                   |
| 63Cu (KED)  | 2.175 ppb             |                   |
| 64Zn (KED)  | 53.726 ppb            |                   |
| 69Ga (KED)  | 0.995 ppb             |                   |
| 75As (KED)  | 0.154 ppb             |                   |
| 80Se (KED)  | 0.019 ppb             |                   |
| 85Rb (KED)  | 0.537 ppb             |                   |
| 88Sr (KED)  | 3.439 ppb             |                   |
| 89Y (KED)   | 133.133 %             |                   |
| 107Ag (KED) | 0.028 ppb             |                   |
| 114Cd (KED) | 0.007 ppb             |                   |
| 115In (KED) | 126.620 %             |                   |
| 133Cs (KED) | 0.029 ppb             |                   |
| 138Ba (KED) | 3.478 ppb             |                   |
| 139La (KED) | 0.263 ppb             |                   |
| 140Ce (KED) | 0.590 ppb             |                   |
| 141Pr (KED) | 0.065 ppb             |                   |
| 142Nd (KED) | 0.365 ppb             |                   |
| 152Sm (KED) | 0.043 ppb             |                   |
| 153Eu (KED) | 0.008 ppb             |                   |
| 158Gd (KED) | 0.037 ppb             |                   |
| 159Tb (KED) | 126.389 %             |                   |
| 164Dy (KED) | 0.024 ppb             |                   |
| 166Er (KED) | 0.009 ppb             |                   |
| 169Tm (KED) | 0.001 ppb             |                   |
| 174Yb (KED) | 0.008 ppb             |                   |
| 175Lu (KED) | -0.107 ppb            |                   |
| 205Tl (KED) | 0.003 ppb             |                   |
| 208Pb (KED) | 0.396 ppb             |                   |
| 209Bi (KED) | 115.386 %             |                   |
| 232Th (KED) | 0.055 ppb             |                   |
| 238U (KED)  | 0.014 ppb             |                   |

| Category   | Concentration average | Intensity average | Intensity RSD |
|------------|-----------------------|-------------------|---------------|
| 6Li (KED)  | 131.000 %             | 3,470 cps         |               |
| 9Be (KED)  | -0.007 ppb            | 0 cps             |               |
| 11B (KED)  | 9.070 ppb             | 1,330 cps         |               |
| 24Mg (KED) | 213.317 ppb           | 136,657 cps       |               |
| 27Al (KED) | 211.249 ppb           | 34,250 cps        |               |

# Comprehensive

10/20/2021 6:11:31 PM

| Category    | Concentration average | Intensity average | Intensity RSD |
|-------------|-----------------------|-------------------|---------------|
| 45Sc (KED)  | 137.421 %             | 54,298 cps        |               |
| 51V (KED)   | 0.423 ppb             | 4,051 cps         |               |
| 52Cr (KED)  | 0.604 ppb             | 9,173 cps         |               |
| 55Mn (KED)  | 5.159 ppb             | 40,047 cps        |               |
| 56Fe (KED)  | 237.510 ppb           | 3,324,702 cps     |               |
| 58Ni (KED)  | 1.159 ppb             | 21,806 cps        |               |
| 59Co (KED)  | 0.110 ppb             | 3,357 cps         |               |
| 63Cu (KED)  | 2.175 ppb             | 50,238 cps        |               |
| 64Zn (KED)  | 53.726 ppb            | 373,916 cps       |               |
| 69Ga (KED)  | 0.995 ppb             | 7,546 cps         |               |
| 75As (KED)  | 0.154 ppb             | 313 cps           |               |
| 80Se (KED)  | 0.019 ppb             | 1,263 cps         |               |
| 85Rb (KED)  | 0.537 ppb             | 3,697 cps         |               |
| 88Sr (KED)  | 3.439 ppb             | 33,318 cps        |               |
| 89Y (KED)   | 133.133 %             | 489,068 cps       |               |
| 107Ag (KED) | 0.028 ppb             | 1,690 cps         |               |
| 114Cd (KED) | 0.007 ppb             | 217 cps           |               |
| 115In (KED) | 126.620 %             | 880,790 cps       |               |
| 133Cs (KED) | 0.029 ppb             | 957 cps           |               |
| 138Ba (KED) | 3.478 ppb             | 154,945 cps       |               |
| 139La (KED) | 0.263 ppb             | 25,235 cps        |               |
| 140Ce (KED) | 0.590 ppb             | 75,638 cps        |               |
| 141Pr (KED) | 0.065 ppb             | 8,783 cps         |               |
| 142Nd (KED) | 0.365 ppb             | 19,742 cps        |               |
| 152Sm (KED) | 0.043 ppb             | 2,097 cps         |               |
| 153Eu (KED) | 0.008 ppb             | 783 cps           |               |
| 158Gd (KED) | 0.037 ppb             | 2,430 cps         |               |
| 159Tb (KED) | 126.389 %             | 4,504,250 cps     |               |
| 164Dy (KED) | 0.024 ppb             | 1,780 cps         |               |
| 166Er (KED) | 0.009 ppb             | 1,293 cps         |               |
| 169Tm (KED) | 0.001 ppb             | 420 cps           |               |
| 174Yb (KED) | 0.008 ppb             | 883 cps           |               |
| 175Lu (KED) | -0.107 ppb            | 17,526 cps        |               |
| 205Tl (KED) | 0.003 ppb             | 510 cps           |               |
| 208Pb (KED) | 0.396 ppb             | 59,495 cps        |               |
| 209Bi (KED) | 115.386 %             | 3,678,200 cps     |               |
| 232Th (KED) | 0.055 ppb             | 14,585 cps        |               |
| 238U (KED)  | 0.014 ppb             | 4,341 cps         |               |

# Comprehensive

10/20/2021 6:11:31 PM

## Sample Summary

Instrument ID: iCAP Q

Analysis index: 35

Analysis name: 03255ti

Analysis started at: 10/20/2021 5:40:28 PM

User name: WINDOWS-UPCI4ER\Administrator

| Category    | Concentration average | Concentration RSD |
|-------------|-----------------------|-------------------|
| 6Li (KED)   | 127.099 %             |                   |
| 9Be (KED)   | -0.007 ppb            |                   |
| 11B (KED)   | 17.825 ppb            |                   |
| 24Mg (KED)  | 144.030 ppb           |                   |
| 27Al (KED)  | 79.411 ppb            |                   |
| 45Sc (KED)  | 138.650 %             |                   |
| 51V (KED)   | 0.161 ppb             |                   |
| 52Cr (KED)  | 0.324 ppb             |                   |
| 55Mn (KED)  | 2.890 ppb             |                   |
| 56Fe (KED)  | 88.372 ppb            |                   |
| 58Ni (KED)  | 0.661 ppb             |                   |
| 59Co (KED)  | 0.059 ppb             |                   |
| 63Cu (KED)  | 2.118 ppb             |                   |
| 64Zn (KED)  | 58.172 ppb            |                   |
| 69Ga (KED)  | 0.487 ppb             |                   |
| 75As (KED)  | 0.254 ppb             |                   |
| 80Se (KED)  | 0.330 ppb             |                   |
| 85Rb (KED)  | 0.840 ppb             |                   |
| 88Sr (KED)  | 2.458 ppb             |                   |
| 89Y (KED)   | 127.175 %             |                   |
| 107Ag (KED) | 0.012 ppb             |                   |
| 114Cd (KED) | 0.008 ppb             |                   |
| 115In (KED) | 121.619 %             |                   |
| 133Cs (KED) | 0.010 ppb             |                   |
| 138Ba (KED) | 1.701 ppb             |                   |
| 139La (KED) | 0.102 ppb             |                   |
| 140Ce (KED) | 0.266 ppb             |                   |
| 141Pr (KED) | 0.023 ppb             |                   |
| 142Nd (KED) | 0.150 ppb             |                   |
| 152Sm (KED) | 0.016 ppb             |                   |
| 153Eu (KED) | 0.003 ppb             |                   |
| 158Gd (KED) | 0.012 ppb             |                   |
| 159Tb (KED) | 123.948 %             |                   |
| 164Dy (KED) | 0.007 ppb             |                   |
| 166Er (KED) | 0.001 ppb             |                   |
| 169Tm (KED) | 0.000 ppb             |                   |
| 174Yb (KED) | 0.003 ppb             |                   |
| 175Lu (KED) | -0.110 ppb            |                   |
| 205Tl (KED) | 0.002 ppb             |                   |
| 208Pb (KED) | 0.190 ppb             |                   |
| 209Bi (KED) | 110.588 %             |                   |
| 232Th (KED) | 0.023 ppb             |                   |
| 238U (KED)  | 0.007 ppb             |                   |

| Category   | Concentration average | Intensity average | Intensity RSD |
|------------|-----------------------|-------------------|---------------|
| 6Li (KED)  | 127.099 %             | 3,367 cps         |               |
| 9Be (KED)  | -0.007 ppb            | 0 cps             |               |
| 11B (KED)  | 17.825 ppb            | 2,177 cps         |               |
| 24Mg (KED) | 144.030 ppb           | 89,557 cps        |               |
| 27Al (KED) | 79.411 ppb            | 13,057 cps        |               |

# Comprehensive

10/20/2021 6:11:31 PM

| Category    | Concentration average | Intensity average | Intensity RSD |
|-------------|-----------------------|-------------------|---------------|
| 45Sc (KED)  | 138.650 %             | 54,783 cps        |               |
| 51V (KED)   | 0.161 ppb             | 1,560 cps         |               |
| 52Cr (KED)  | 0.324 ppb             | 5,004 cps         |               |
| 55Mn (KED)  | 2.890 ppb             | 22,657 cps        |               |
| 56Fe (KED)  | 88.372 ppb            | 1,249,532 cps     |               |
| 58Ni (KED)  | 0.661 ppb             | 12,710 cps        |               |
| 59Co (KED)  | 0.059 ppb             | 1,823 cps         |               |
| 63Cu (KED)  | 2.118 ppb             | 46,754 cps        |               |
| 64Zn (KED)  | 58.172 ppb            | 386,657 cps       |               |
| 69Ga (KED)  | 0.487 ppb             | 3,574 cps         |               |
| 75As (KED)  | 0.254 ppb             | 480 cps           |               |
| 80Se (KED)  | 0.330 ppb             | 1,400 cps         |               |
| 85Rb (KED)  | 0.840 ppb             | 5,511 cps         |               |
| 88Sr (KED)  | 2.458 ppb             | 22,804 cps        |               |
| 89Y (KED)   | 127.175 %             | 467,183 cps       |               |
| 107Ag (KED) | 0.012 ppb             | 730 cps           |               |
| 114Cd (KED) | 0.008 ppb             | 230 cps           |               |
| 115In (KED) | 121.619 %             | 846,000 cps       |               |
| 133Cs (KED) | 0.010 ppb             | 343 cps           |               |
| 138Ba (KED) | 1.701 ppb             | 75,193 cps        |               |
| 139La (KED) | 0.102 ppb             | 9,597 cps         |               |
| 140Ce (KED) | 0.266 ppb             | 33,555 cps        |               |
| 141Pr (KED) | 0.023 ppb             | 3,027 cps         |               |
| 142Nd (KED) | 0.150 ppb             | 7,976 cps         |               |
| 152Sm (KED) | 0.016 ppb             | 763 cps           |               |
| 153Eu (KED) | 0.003 ppb             | 290 cps           |               |
| 158Gd (KED) | 0.012 ppb             | 757 cps           |               |
| 159Tb (KED) | 123.948 %             | 4,417,260 cps     |               |
| 164Dy (KED) | 0.007 ppb             | 547 cps           |               |
| 166Er (KED) | 0.001 ppb             | 670 cps           |               |
| 169Tm (KED) | 0.000 ppb             | 147 cps           |               |
| 174Yb (KED) | 0.003 ppb             | 327 cps           |               |
| 175Lu (KED) | -0.110 ppb            | 16,738 cps        |               |
| 205Tl (KED) | 0.002 ppb             | 373 cps           |               |
| 208Pb (KED) | 0.190 ppb             | 30,110 cps        |               |
| 209Bi (KED) | 110.588 %             | 3,525,256 cps     |               |
| 232Th (KED) | 0.023 ppb             | 5,775 cps         |               |
| 238U (KED)  | 0.007 ppb             | 2,207 cps         |               |

# Comprehensive

10/20/2021 6:11:31 PM

## Sample Summary

Instrument ID: iCAP Q

Analysis index: 36

Analysis name: 03028ti

Analysis started at: 10/20/2021 5:42:24 PM

User name: WINDOWS-UPCI4ER\Administrator

| Category    | Concentration average | Concentration RSD |
|-------------|-----------------------|-------------------|
| 6Li (KED)   | 131.630 %             |                   |
| 9Be (KED)   | -0.007 ppb            |                   |
| 11B (KED)   | 57.058 ppb            |                   |
| 24Mg (KED)  | 112.651 ppb           |                   |
| 27Al (KED)  | 84.603 ppb            |                   |
| 45Sc (KED)  | 139.556 %             |                   |
| 51V (KED)   | 0.162 ppb             |                   |
| 52Cr (KED)  | 0.431 ppb             |                   |
| 55Mn (KED)  | 2.300 ppb             |                   |
| 56Fe (KED)  | 90.096 ppb            |                   |
| 58Ni (KED)  | 0.612 ppb             |                   |
| 59Co (KED)  | 0.053 ppb             |                   |
| 63Cu (KED)  | 2.431 ppb             |                   |
| 64Zn (KED)  | 56.813 ppb            |                   |
| 69Ga (KED)  | 0.655 ppb             |                   |
| 75As (KED)  | 0.110 ppb             |                   |
| 80Se (KED)  | 0.237 ppb             |                   |
| 85Rb (KED)  | 0.623 ppb             |                   |
| 88Sr (KED)  | 1.950 ppb             |                   |
| 89Y (KED)   | 131.371 %             |                   |
| 107Ag (KED) | 0.010 ppb             |                   |
| 114Cd (KED) | 0.007 ppb             |                   |
| 115In (KED) | 125.428 %             |                   |
| 133Cs (KED) | 0.014 ppb             |                   |
| 138Ba (KED) | 2.211 ppb             |                   |
| 139La (KED) | 0.113 ppb             |                   |
| 140Ce (KED) | 0.253 ppb             |                   |
| 141Pr (KED) | 0.030 ppb             |                   |
| 142Nd (KED) | 0.157 ppb             |                   |
| 152Sm (KED) | 0.019 ppb             |                   |
| 153Eu (KED) | 0.003 ppb             |                   |
| 158Gd (KED) | 0.014 ppb             |                   |
| 159Tb (KED) | 125.070 %             |                   |
| 164Dy (KED) | 0.009 ppb             |                   |
| 166Er (KED) | 0.002 ppb             |                   |
| 169Tm (KED) | 0.001 ppb             |                   |
| 174Yb (KED) | 0.003 ppb             |                   |
| 175Lu (KED) | -0.102 ppb            |                   |
| 205Tl (KED) | 0.003 ppb             |                   |
| 208Pb (KED) | 0.229 ppb             |                   |
| 209Bi (KED) | 114.915 %             |                   |
| 232Th (KED) | 0.023 ppb             |                   |
| 238U (KED)  | 0.006 ppb             |                   |

| Category   | Concentration average | Intensity average | Intensity RSD |
|------------|-----------------------|-------------------|---------------|
| 6Li (KED)  | 131.630 %             | 3,487 cps         |               |
| 9Be (KED)  | -0.007 ppb            | 0 cps             |               |
| 11B (KED)  | 57.058 ppb            | 6,368 cps         |               |
| 24Mg (KED) | 112.651 ppb           | 72,567 cps        |               |
| 27Al (KED) | 84.603 ppb            | 13,995 cps        |               |

# Comprehensive

10/20/2021 6:11:31 PM

| Category    | Concentration average | Intensity average | Intensity RSD |
|-------------|-----------------------|-------------------|---------------|
| 45Sc (KED)  | 139.556 %             | 55,141 cps        |               |
| 51V (KED)   | 0.162 ppb             | 1,580 cps         |               |
| 52Cr (KED)  | 0.431 ppb             | 6,662 cps         |               |
| 55Mn (KED)  | 2.300 ppb             | 18,163 cps        |               |
| 56Fe (KED)  | 90.096 ppb            | 1,282,195 cps     |               |
| 58Ni (KED)  | 0.612 ppb             | 11,882 cps        |               |
| 59Co (KED)  | 0.053 ppb             | 1,653 cps         |               |
| 63Cu (KED)  | 2.431 ppb             | 55,302 cps        |               |
| 64Zn (KED)  | 56.813 ppb            | 390,107 cps       |               |
| 69Ga (KED)  | 0.655 ppb             | 4,928 cps         |               |
| 75As (KED)  | 0.110 ppb             | 227 cps           |               |
| 80Se (KED)  | 0.237 ppb             | 1,387 cps         |               |
| 85Rb (KED)  | 0.623 ppb             | 4,224 cps         |               |
| 88Sr (KED)  | 1.950 ppb             | 18,741 cps        |               |
| 89Y (KED)   | 131.371 %             | 482,597 cps       |               |
| 107Ag (KED) | 0.010 ppb             | 607 cps           |               |
| 114Cd (KED) | 0.007 ppb             | 227 cps           |               |
| 115In (KED) | 125.428 %             | 872,502 cps       |               |
| 133Cs (KED) | 0.014 ppb             | 463 cps           |               |
| 138Ba (KED) | 2.211 ppb             | 98,094 cps        |               |
| 139La (KED) | 0.113 ppb             | 10,791 cps        |               |
| 140Ce (KED) | 0.253 ppb             | 32,158 cps        |               |
| 141Pr (KED) | 0.030 ppb             | 4,051 cps         |               |
| 142Nd (KED) | 0.157 ppb             | 8,436 cps         |               |
| 152Sm (KED) | 0.019 ppb             | 923 cps           |               |
| 153Eu (KED) | 0.003 ppb             | 293 cps           |               |
| 158Gd (KED) | 0.014 ppb             | 897 cps           |               |
| 159Tb (KED) | 125.070 %             | 4,457,249 cps     |               |
| 164Dy (KED) | 0.009 ppb             | 710 cps           |               |
| 166Er (KED) | 0.002 ppb             | 750 cps           |               |
| 169Tm (KED) | 0.001 ppb             | 157 cps           |               |
| 174Yb (KED) | 0.003 ppb             | 370 cps           |               |
| 175Lu (KED) | -0.102 ppb            | 18,270 cps        |               |
| 205Tl (KED) | 0.003 ppb             | 510 cps           |               |
| 208Pb (KED) | 0.229 ppb             | 36,654 cps        |               |
| 209Bi (KED) | 114.915 %             | 3,663,180 cps     |               |
| 232Th (KED) | 0.023 ppb             | 6,091 cps         |               |
| 238U (KED)  | 0.006 ppb             | 1,883 cps         |               |

# Comprehensive

10/20/2021 6:11:31 PM

## Sample Summary

Instrument ID: iCAP Q

Analysis index: 37

Analysis name: 03252ti

Analysis started at: 10/20/2021 5:44:27 PM

User name: WINDOWS-UPCI4ER\Administrator

| Category    | Concentration average | Concentration RSD |
|-------------|-----------------------|-------------------|
| 6Li (KED)   | 129.616 %             |                   |
| 9Be (KED)   | -0.007 ppb            |                   |
| 11B (KED)   | 14.986 ppb            |                   |
| 24Mg (KED)  | 154.889 ppb           |                   |
| 27Al (KED)  | 110.913 ppb           |                   |
| 45Sc (KED)  | 135.515 %             |                   |
| 51V (KED)   | 0.220 ppb             |                   |
| 52Cr (KED)  | 0.582 ppb             |                   |
| 55Mn (KED)  | 3.340 ppb             |                   |
| 56Fe (KED)  | 133.410 ppb           |                   |
| 58Ni (KED)  | 0.792 ppb             |                   |
| 59Co (KED)  | 0.061 ppb             |                   |
| 63Cu (KED)  | 3.104 ppb             |                   |
| 64Zn (KED)  | 51.373 ppb            |                   |
| 69Ga (KED)  | 0.679 ppb             |                   |
| 75As (KED)  | 0.114 ppb             |                   |
| 80Se (KED)  | 0.242 ppb             |                   |
| 85Rb (KED)  | 0.993 ppb             |                   |
| 88Sr (KED)  | 2.666 ppb             |                   |
| 89Y (KED)   | 128.547 %             |                   |
| 107Ag (KED) | 0.013 ppb             |                   |
| 114Cd (KED) | 0.008 ppb             |                   |
| 115In (KED) | 120.636 %             |                   |
| 133Cs (KED) | 0.016 ppb             |                   |
| 138Ba (KED) | 2.507 ppb             |                   |
| 139La (KED) | 0.151 ppb             |                   |
| 140Ce (KED) | 0.315 ppb             |                   |
| 141Pr (KED) | 0.038 ppb             |                   |
| 142Nd (KED) | 0.190 ppb             |                   |
| 152Sm (KED) | 0.022 ppb             |                   |
| 153Eu (KED) | 0.004 ppb             |                   |
| 158Gd (KED) | 0.018 ppb             |                   |
| 159Tb (KED) | 120.031 %             |                   |
| 164Dy (KED) | 0.012 ppb             |                   |
| 166Er (KED) | 0.002 ppb             |                   |
| 169Tm (KED) | 0.001 ppb             |                   |
| 174Yb (KED) | 0.006 ppb             |                   |
| 175Lu (KED) | -0.109 ppb            |                   |
| 205Tl (KED) | 0.002 ppb             |                   |
| 208Pb (KED) | 0.415 ppb             |                   |
| 209Bi (KED) | 110.824 %             |                   |
| 232Th (KED) | 0.032 ppb             |                   |
| 238U (KED)  | 0.009 ppb             |                   |

| Category   | Concentration average | Intensity average | Intensity RSD |
|------------|-----------------------|-------------------|---------------|
| 6Li (KED)  | 129.616 %             | 3,434 cps         |               |
| 9Be (KED)  | -0.007 ppb            | 0 cps             |               |
| 11B (KED)  | 14.986 ppb            | 1,927 cps         |               |
| 24Mg (KED) | 154.889 ppb           | 98,208 cps        |               |
| 27Al (KED) | 110.913 ppb           | 17,783 cps        |               |

# Comprehensive

10/20/2021 6:11:31 PM

| Category    | Concentration average | Intensity average | Intensity RSD |
|-------------|-----------------------|-------------------|---------------|
| 45Sc (KED)  | 135.515 %             | 53,545 cps        |               |
| 51V (KED)   | 0.220 ppb             | 2,084 cps         |               |
| 52Cr (KED)  | 0.582 ppb             | 8,710 cps         |               |
| 55Mn (KED)  | 3.340 ppb             | 25,583 cps        |               |
| 56Fe (KED)  | 133.410 ppb           | 1,842,560 cps     |               |
| 58Ni (KED)  | 0.792 ppb             | 14,815 cps        |               |
| 59Co (KED)  | 0.061 ppb             | 1,853 cps         |               |
| 63Cu (KED)  | 3.104 ppb             | 68,869 cps        |               |
| 64Zn (KED)  | 51.373 ppb            | 345,270 cps       |               |
| 69Ga (KED)  | 0.679 ppb             | 5,001 cps         |               |
| 75As (KED)  | 0.114 ppb             | 230 cps           |               |
| 80Se (KED)  | 0.242 ppb             | 1,360 cps         |               |
| 85Rb (KED)  | 0.993 ppb             | 6,582 cps         |               |
| 88Sr (KED)  | 2.666 ppb             | 24,982 cps        |               |
| 89Y (KED)   | 128.547 %             | 472,224 cps       |               |
| 107Ag (KED) | 0.013 ppb             | 740 cps           |               |
| 114Cd (KED) | 0.008 ppb             | 233 cps           |               |
| 115In (KED) | 120.636 %             | 839,164 cps       |               |
| 133Cs (KED) | 0.016 ppb             | 527 cps           |               |
| 138Ba (KED) | 2.507 ppb             | 106,523 cps       |               |
| 139La (KED) | 0.151 ppb             | 13,781 cps        |               |
| 140Ce (KED) | 0.315 ppb             | 38,409 cps        |               |
| 141Pr (KED) | 0.038 ppb             | 4,854 cps         |               |
| 142Nd (KED) | 0.190 ppb             | 9,764 cps         |               |
| 152Sm (KED) | 0.022 ppb             | 1,013 cps         |               |
| 153Eu (KED) | 0.004 ppb             | 417 cps           |               |
| 158Gd (KED) | 0.018 ppb             | 1,097 cps         |               |
| 159Tb (KED) | 120.031 %             | 4,277,666 cps     |               |
| 164Dy (KED) | 0.012 ppb             | 880 cps           |               |
| 166Er (KED) | 0.002 ppb             | 670 cps           |               |
| 169Tm (KED) | 0.001 ppb             | 273 cps           |               |
| 174Yb (KED) | 0.006 ppb             | 623 cps           |               |
| 175Lu (KED) | -0.109 ppb            | 16,311 cps        |               |
| 205Tl (KED) | 0.002 ppb             | 463 cps           |               |
| 208Pb (KED) | 0.415 ppb             | 59,619 cps        |               |
| 209Bi (KED) | 110.824 %             | 3,532,790 cps     |               |
| 232Th (KED) | 0.032 ppb             | 8,276 cps         |               |
| 238U (KED)  | 0.009 ppb             | 2,804 cps         |               |

# Comprehensive

10/20/2021 6:11:31 PM

## Sample Summary

Instrument ID: iCAP Q

Analysis index: 38

Analysis name: 03035ti

Analysis started at: 10/20/2021 5:46:21 PM

User name: WINDOWS-UPCI4ER\Administrator

| Category    | Concentration average | Concentration RSD |
|-------------|-----------------------|-------------------|
| 6Li (KED)   | 135.783 %             |                   |
| 9Be (KED)   | 0.010 ppb             |                   |
| 11B (KED)   | 11.703 ppb            |                   |
| 24Mg (KED)  | 173.578 ppb           |                   |
| 27Al (KED)  | 153.736 ppb           |                   |
| 45Sc (KED)  | 149.031 %             |                   |
| 51V (KED)   | 0.299 ppb             |                   |
| 52Cr (KED)  | 0.509 ppb             |                   |
| 55Mn (KED)  | 3.898 ppb             |                   |
| 56Fe (KED)  | 164.231 ppb           |                   |
| 58Ni (KED)  | 0.995 ppb             |                   |
| 59Co (KED)  | 0.075 ppb             |                   |
| 63Cu (KED)  | 1.989 ppb             |                   |
| 64Zn (KED)  | 45.111 ppb            |                   |
| 69Ga (KED)  | 0.788 ppb             |                   |
| 75As (KED)  | 0.111 ppb             |                   |
| 80Se (KED)  | 0.406 ppb             |                   |
| 85Rb (KED)  | 0.462 ppb             |                   |
| 88Sr (KED)  | 3.300 ppb             |                   |
| 89Y (KED)   | 137.681 %             |                   |
| 107Ag (KED) | 0.016 ppb             |                   |
| 114Cd (KED) | 0.003 ppb             |                   |
| 115In (KED) | 125.887 %             |                   |
| 133Cs (KED) | 0.019 ppb             |                   |
| 138Ba (KED) | 2.613 ppb             |                   |
| 139La (KED) | 0.169 ppb             |                   |
| 140Ce (KED) | 0.376 ppb             |                   |
| 141Pr (KED) | 0.044 ppb             |                   |
| 142Nd (KED) | 0.223 ppb             |                   |
| 152Sm (KED) | 0.026 ppb             |                   |
| 153Eu (KED) | 0.006 ppb             |                   |
| 158Gd (KED) | 0.022 ppb             |                   |
| 159Tb (KED) | 132.085 %             |                   |
| 164Dy (KED) | 0.015 ppb             |                   |
| 166Er (KED) | 0.004 ppb             |                   |
| 169Tm (KED) | 0.001 ppb             |                   |
| 174Yb (KED) | 0.005 ppb             |                   |
| 175Lu (KED) | -0.116 ppb            |                   |
| 205Tl (KED) | 0.002 ppb             |                   |
| 208Pb (KED) | 0.355 ppb             |                   |
| 209Bi (KED) | 107.383 %             |                   |
| 232Th (KED) | 0.047 ppb             |                   |
| 238U (KED)  | 0.010 ppb             |                   |

| Category   | Concentration average | Intensity average | Intensity RSD |
|------------|-----------------------|-------------------|---------------|
| 6Li (KED)  | 135.783 %             | 3,597 cps         |               |
| 9Be (KED)  | 0.010 ppb             | 3 cps             |               |
| 11B (KED)  | 11.703 ppb            | 1,663 cps         |               |
| 24Mg (KED) | 173.578 ppb           | 115,280 cps       |               |
| 27Al (KED) | 153.736 ppb           | 27,063 cps        |               |

# Comprehensive

10/20/2021 6:11:31 PM

| Category    | Concentration average | Intensity average | Intensity RSD |
|-------------|-----------------------|-------------------|---------------|
| 45Sc (KED)  | 149.031 %             | 58,885 cps        |               |
| 51V (KED)   | 0.299 ppb             | 3,107 cps         |               |
| 52Cr (KED)  | 0.509 ppb             | 8,389 cps         |               |
| 55Mn (KED)  | 3.898 ppb             | 32,827 cps        |               |
| 56Fe (KED)  | 164.231 ppb           | 2,493,911 cps     |               |
| 58Ni (KED)  | 0.995 ppb             | 20,353 cps        |               |
| 59Co (KED)  | 0.075 ppb             | 2,497 cps         |               |
| 63Cu (KED)  | 1.989 ppb             | 47,587 cps        |               |
| 64Zn (KED)  | 45.111 ppb            | 324,864 cps       |               |
| 69Ga (KED)  | 0.788 ppb             | 6,195 cps         |               |
| 75As (KED)  | 0.111 ppb             | 240 cps           |               |
| 80Se (KED)  | 0.406 ppb             | 1,567 cps         |               |
| 85Rb (KED)  | 0.462 ppb             | 3,287 cps         |               |
| 88Sr (KED)  | 3.300 ppb             | 33,067 cps        |               |
| 89Y (KED)   | 137.681 %             | 505,776 cps       |               |
| 107Ag (KED) | 0.016 ppb             | 997 cps           |               |
| 114Cd (KED) | 0.003 ppb             | 123 cps           |               |
| 115In (KED) | 125.887 %             | 875,691 cps       |               |
| 133Cs (KED) | 0.019 ppb             | 657 cps           |               |
| 138Ba (KED) | 2.613 ppb             | 122,109 cps       |               |
| 139La (KED) | 0.169 ppb             | 16,945 cps        |               |
| 140Ce (KED) | 0.376 ppb             | 50,429 cps        |               |
| 141Pr (KED) | 0.044 ppb             | 6,288 cps         |               |
| 142Nd (KED) | 0.223 ppb             | 12,593 cps        |               |
| 152Sm (KED) | 0.026 ppb             | 1,323 cps         |               |
| 153Eu (KED) | 0.006 ppb             | 587 cps           |               |
| 158Gd (KED) | 0.022 ppb             | 1,520 cps         |               |
| 159Tb (KED) | 132.085 %             | 4,707,258 cps     |               |
| 164Dy (KED) | 0.015 ppb             | 1,187 cps         |               |
| 166Er (KED) | 0.004 ppb             | 900 cps           |               |
| 169Tm (KED) | 0.001 ppb             | 333 cps           |               |
| 174Yb (KED) | 0.005 ppb             | 613 cps           |               |
| 175Lu (KED) | -0.116 ppb            | 16,721 cps        |               |
| 205Tl (KED) | 0.002 ppb             | 373 cps           |               |
| 208Pb (KED) | 0.355 ppb             | 50,235 cps        |               |
| 209Bi (KED) | 107.383 %             | 3,423,095 cps     |               |
| 232Th (KED) | 0.047 ppb             | 11,662 cps        |               |
| 238U (KED)  | 0.010 ppb             | 3,080 cps         |               |

# Comprehensive

10/20/2021 6:11:31 PM

## Sample Summary

Instrument ID: iCAP Q

Analysis index: 39

Analysis name: 03262ti

Analysis started at: 10/20/2021 5:48:15 PM

User name: WINDOWS-UPCI4ER\Administrator

| Category    | Concentration average | Concentration RSD |
|-------------|-----------------------|-------------------|
| 6Li (KED)   | 133.392 %             |                   |
| 9Be (KED)   | -0.007 ppb            |                   |
| 11B (KED)   | 4.418 ppb             |                   |
| 24Mg (KED)  | 134.168 ppb           |                   |
| 27Al (KED)  | 104.778 ppb           |                   |
| 45Sc (KED)  | 154.948 %             |                   |
| 51V (KED)   | 0.214 ppb             |                   |
| 52Cr (KED)  | 0.517 ppb             |                   |
| 55Mn (KED)  | 2.924 ppb             |                   |
| 56Fe (KED)  | 116.659 ppb           |                   |
| 58Ni (KED)  | 0.703 ppb             |                   |
| 59Co (KED)  | 0.050 ppb             |                   |
| 63Cu (KED)  | 2.335 ppb             |                   |
| 64Zn (KED)  | 40.215 ppb            |                   |
| 69Ga (KED)  | 0.492 ppb             |                   |
| 75As (KED)  | 0.103 ppb             |                   |
| 80Se (KED)  | 0.460 ppb             |                   |
| 85Rb (KED)  | 0.515 ppb             |                   |
| 88Sr (KED)  | 2.125 ppb             |                   |
| 89Y (KED)   | 141.127 %             |                   |
| 107Ag (KED) | 0.017 ppb             |                   |
| 114Cd (KED) | 0.003 ppb             |                   |
| 115In (KED) | 130.612 %             |                   |
| 133Cs (KED) | 0.014 ppb             |                   |
| 138Ba (KED) | 1.826 ppb             |                   |
| 139La (KED) | 0.131 ppb             |                   |
| 140Ce (KED) | 0.314 ppb             |                   |
| 141Pr (KED) | 0.032 ppb             |                   |
| 142Nd (KED) | 0.185 ppb             |                   |
| 152Sm (KED) | 0.020 ppb             |                   |
| 153Eu (KED) | 0.004 ppb             |                   |
| 158Gd (KED) | 0.017 ppb             |                   |
| 159Tb (KED) | 133.103 %             |                   |
| 164Dy (KED) | 0.010 ppb             |                   |
| 166Er (KED) | 0.004 ppb             |                   |
| 169Tm (KED) | 0.001 ppb             |                   |
| 174Yb (KED) | 0.003 ppb             |                   |
| 175Lu (KED) | -0.109 ppb            |                   |
| 205Tl (KED) | 0.002 ppb             |                   |
| 208Pb (KED) | 0.225 ppb             |                   |
| 209Bi (KED) | 109.870 %             |                   |
| 232Th (KED) | 0.031 ppb             |                   |
| 238U (KED)  | 0.008 ppb             |                   |

| Category   | Concentration average | Intensity average | Intensity RSD |
|------------|-----------------------|-------------------|---------------|
| 6Li (KED)  | 133.392 %             | 3,534 cps         |               |
| 9Be (KED)  | -0.007 ppb            | 0 cps             |               |
| 11B (KED)  | 4.418 ppb             | 860 cps           |               |
| 24Mg (KED) | 134.168 ppb           | 87,563 cps        |               |
| 27Al (KED) | 104.778 ppb           | 19,215 cps        |               |

# Comprehensive

10/20/2021 6:11:31 PM

| Category    | Concentration average | Intensity average | Intensity RSD |
|-------------|-----------------------|-------------------|---------------|
| 45Sc (KED)  | 154.948 %             | 61,223 cps        |               |
| 51V (KED)   | 0.214 ppb             | 2,317 cps         |               |
| 52Cr (KED)  | 0.517 ppb             | 8,863 cps         |               |
| 55Mn (KED)  | 2.924 ppb             | 25,616 cps        |               |
| 56Fe (KED)  | 116.659 ppb           | 1,842,594 cps     |               |
| 58Ni (KED)  | 0.703 ppb             | 15,089 cps        |               |
| 59Co (KED)  | 0.050 ppb             | 1,757 cps         |               |
| 63Cu (KED)  | 2.335 ppb             | 57,104 cps        |               |
| 64Zn (KED)  | 40.215 ppb            | 296,986 cps       |               |
| 69Ga (KED)  | 0.492 ppb             | 4,001 cps         |               |
| 75As (KED)  | 0.103 ppb             | 230 cps           |               |
| 80Se (KED)  | 0.460 ppb             | 1,643 cps         |               |
| 85Rb (KED)  | 0.515 ppb             | 3,761 cps         |               |
| 88Sr (KED)  | 2.125 ppb             | 21,909 cps        |               |
| 89Y (KED)   | 141.127 %             | 518,436 cps       |               |
| 107Ag (KED) | 0.017 ppb             | 1,073 cps         |               |
| 114Cd (KED) | 0.003 ppb             | 140 cps           |               |
| 115In (KED) | 130.612 %             | 908,561 cps       |               |
| 133Cs (KED) | 0.014 ppb             | 510 cps           |               |
| 138Ba (KED) | 1.826 ppb             | 86,529 cps        |               |
| 139La (KED) | 0.131 ppb             | 13,207 cps        |               |
| 140Ce (KED) | 0.314 ppb             | 42,509 cps        |               |
| 141Pr (KED) | 0.032 ppb             | 4,524 cps         |               |
| 142Nd (KED) | 0.185 ppb             | 10,531 cps        |               |
| 152Sm (KED) | 0.020 ppb             | 1,013 cps         |               |
| 153Eu (KED) | 0.004 ppb             | 427 cps           |               |
| 158Gd (KED) | 0.017 ppb             | 1,150 cps         |               |
| 159Tb (KED) | 133.103 %             | 4,743,554 cps     |               |
| 164Dy (KED) | 0.010 ppb             | 800 cps           |               |
| 166Er (KED) | 0.004 ppb             | 927 cps           |               |
| 169Tm (KED) | 0.001 ppb             | 227 cps           |               |
| 174Yb (KED) | 0.003 ppb             | 413 cps           |               |
| 175Lu (KED) | -0.109 ppb            | 18,210 cps        |               |
| 205Tl (KED) | 0.002 ppb             | 370 cps           |               |
| 208Pb (KED) | 0.225 ppb             | 34,461 cps        |               |
| 209Bi (KED) | 109.870 %             | 3,502,380 cps     |               |
| 232Th (KED) | 0.031 ppb             | 7,742 cps         |               |
| 238U (KED)  | 0.008 ppb             | 2,560 cps         |               |

# Comprehensive

10/20/2021 6:11:31 PM

## Sample Summary

Instrument ID: iCAP Q

Analysis index: 40

Analysis name: 03253ti

Analysis started at: 10/20/2021 5:50:14 PM

User name: WINDOWS-UPCI4ER\Administrator

| Category    | Concentration average | Concentration RSD |
|-------------|-----------------------|-------------------|
| 6Li (KED)   | 132.007 %             |                   |
| 9Be (KED)   | -0.007 ppb            |                   |
| 11B (KED)   | 24.254 ppb            |                   |
| 24Mg (KED)  | 170.559 ppb           |                   |
| 27Al (KED)  | 138.017 ppb           |                   |
| 45Sc (KED)  | 148.845 %             |                   |
| 51V (KED)   | 0.287 ppb             |                   |
| 52Cr (KED)  | 0.511 ppb             |                   |
| 55Mn (KED)  | 3.440 ppb             |                   |
| 56Fe (KED)  | 159.872 ppb           |                   |
| 58Ni (KED)  | 0.760 ppb             |                   |
| 59Co (KED)  | 0.078 ppb             |                   |
| 63Cu (KED)  | 2.436 ppb             |                   |
| 64Zn (KED)  | 38.503 ppb            |                   |
| 69Ga (KED)  | 0.660 ppb             |                   |
| 75As (KED)  | 0.081 ppb             |                   |
| 80Se (KED)  | 0.399 ppb             |                   |
| 85Rb (KED)  | 0.847 ppb             |                   |
| 88Sr (KED)  | 2.448 ppb             |                   |
| 89Y (KED)   | 136.647 %             |                   |
| 107Ag (KED) | 0.008 ppb             |                   |
| 114Cd (KED) | 0.005 ppb             |                   |
| 115In (KED) | 127.525 %             |                   |
| 133Cs (KED) | 0.023 ppb             |                   |
| 138Ba (KED) | 2.394 ppb             |                   |
| 139La (KED) | 0.181 ppb             |                   |
| 140Ce (KED) | 0.376 ppb             |                   |
| 141Pr (KED) | 0.044 ppb             |                   |
| 142Nd (KED) | 0.220 ppb             |                   |
| 152Sm (KED) | 0.026 ppb             |                   |
| 153Eu (KED) | 0.006 ppb             |                   |
| 158Gd (KED) | 0.021 ppb             |                   |
| 159Tb (KED) | 131.780 %             |                   |
| 164Dy (KED) | 0.014 ppb             |                   |
| 166Er (KED) | 0.004 ppb             |                   |
| 169Tm (KED) | 0.001 ppb             |                   |
| 174Yb (KED) | 0.005 ppb             |                   |
| 175Lu (KED) | -0.112 ppb            |                   |
| 205Tl (KED) | 0.003 ppb             |                   |
| 208Pb (KED) | 0.243 ppb             |                   |
| 209Bi (KED) | 102.728 %             |                   |
| 232Th (KED) | 0.042 ppb             |                   |
| 238U (KED)  | 0.011 ppb             |                   |

| Category   | Concentration average | Intensity average | Intensity RSD |
|------------|-----------------------|-------------------|---------------|
| 6Li (KED)  | 132.007 %             | 3,497 cps         |               |
| 9Be (KED)  | -0.007 ppb            | 0 cps             |               |
| 11B (KED)  | 24.254 ppb            | 2,937 cps         |               |
| 24Mg (KED) | 170.559 ppb           | 110,127 cps       |               |
| 27Al (KED) | 138.017 ppb           | 24,277 cps        |               |

# Comprehensive

10/20/2021 6:11:31 PM

| Category    | Concentration average | Intensity average | Intensity RSD |
|-------------|-----------------------|-------------------|---------------|
| 45Sc (KED)  | 148.845 %             | 58,812 cps        |               |
| 51V (KED)   | 0.287 ppb             | 2,984 cps         |               |
| 52Cr (KED)  | 0.511 ppb             | 8,420 cps         |               |
| 55Mn (KED)  | 3.440 ppb             | 28,940 cps        |               |
| 56Fe (KED)  | 159.872 ppb           | 2,424,750 cps     |               |
| 58Ni (KED)  | 0.760 ppb             | 15,623 cps        |               |
| 59Co (KED)  | 0.078 ppb             | 2,584 cps         |               |
| 63Cu (KED)  | 2.436 ppb             | 57,643 cps        |               |
| 64Zn (KED)  | 38.503 ppb            | 275,368 cps       |               |
| 69Ga (KED)  | 0.660 ppb             | 5,168 cps         |               |
| 75As (KED)  | 0.081 ppb             | 180 cps           |               |
| 80Se (KED)  | 0.399 ppb             | 1,550 cps         |               |
| 85Rb (KED)  | 0.847 ppb             | 5,971 cps         |               |
| 88Sr (KED)  | 2.448 ppb             | 24,411 cps        |               |
| 89Y (KED)   | 136.647 %             | 501,980 cps       |               |
| 107Ag (KED) | 0.008 ppb             | 503 cps           |               |
| 114Cd (KED) | 0.005 ppb             | 173 cps           |               |
| 115In (KED) | 127.525 %             | 887,088 cps       |               |
| 133Cs (KED) | 0.023 ppb             | 790 cps           |               |
| 138Ba (KED) | 2.394 ppb             | 111,767 cps       |               |
| 139La (KED) | 0.181 ppb             | 18,083 cps        |               |
| 140Ce (KED) | 0.376 ppb             | 50,341 cps        |               |
| 141Pr (KED) | 0.044 ppb             | 6,145 cps         |               |
| 142Nd (KED) | 0.220 ppb             | 12,430 cps        |               |
| 152Sm (KED) | 0.026 ppb             | 1,330 cps         |               |
| 153Eu (KED) | 0.006 ppb             | 617 cps           |               |
| 158Gd (KED) | 0.021 ppb             | 1,443 cps         |               |
| 159Tb (KED) | 131.780 %             | 4,696,391 cps     |               |
| 164Dy (KED) | 0.014 ppb             | 1,097 cps         |               |
| 166Er (KED) | 0.004 ppb             | 927 cps           |               |
| 169Tm (KED) | 0.001 ppb             | 303 cps           |               |
| 174Yb (KED) | 0.005 ppb             | 590 cps           |               |
| 175Lu (KED) | -0.112 ppb            | 17,366 cps        |               |
| 205Tl (KED) | 0.003 ppb             | 503 cps           |               |
| 208Pb (KED) | 0.243 ppb             | 34,387 cps        |               |
| 209Bi (KED) | 102.728 %             | 3,274,688 cps     |               |
| 232Th (KED) | 0.042 ppb             | 9,841 cps         |               |
| 238U (KED)  | 0.011 ppb             | 2,997 cps         |               |

# Comprehensive

10/20/2021 6:11:31 PM

## Sample Summary

Instrument ID: iCAP Q

Analysis index: 41

Analysis name: 03032ti

Analysis started at: 10/20/2021 5:52:11 PM

User name: WINDOWS-UPCI4ER\Administrator

| Category    | Concentration average | Concentration RSD |
|-------------|-----------------------|-------------------|
| 6Li (KED)   | 137.923 %             |                   |
| 9Be (KED)   | -0.007 ppb            |                   |
| 11B (KED)   | 11.374 ppb            |                   |
| 24Mg (KED)  | 137.820 ppb           |                   |
| 27Al (KED)  | 114.252 ppb           |                   |
| 45Sc (KED)  | 152.820 %             |                   |
| 51V (KED)   | 0.282 ppb             |                   |
| 52Cr (KED)  | 6.846 ppb             |                   |
| 55Mn (KED)  | 3.141 ppb             |                   |
| 56Fe (KED)  | 127.334 ppb           |                   |
| 58Ni (KED)  | 0.927 ppb             |                   |
| 59Co (KED)  | 0.063 ppb             |                   |
| 63Cu (KED)  | 2.115 ppb             |                   |
| 64Zn (KED)  | 67.564 ppb            |                   |
| 69Ga (KED)  | 0.523 ppb             |                   |
| 75As (KED)  | 0.066 ppb             |                   |
| 80Se (KED)  | 0.284 ppb             |                   |
| 85Rb (KED)  | 0.541 ppb             |                   |
| 88Sr (KED)  | 2.303 ppb             |                   |
| 89Y (KED)   | 144.953 %             |                   |
| 107Ag (KED) | 0.010 ppb             |                   |
| 114Cd (KED) | 0.006 ppb             |                   |
| 115In (KED) | 134.529 %             |                   |
| 133Cs (KED) | 0.015 ppb             |                   |
| 138Ba (KED) | 1.864 ppb             |                   |
| 139La (KED) | 0.138 ppb             |                   |
| 140Ce (KED) | 0.289 ppb             |                   |
| 141Pr (KED) | 0.031 ppb             |                   |
| 142Nd (KED) | 0.173 ppb             |                   |
| 152Sm (KED) | 0.018 ppb             |                   |
| 153Eu (KED) | 0.004 ppb             |                   |
| 158Gd (KED) | 0.015 ppb             |                   |
| 159Tb (KED) | 136.511 %             |                   |
| 164Dy (KED) | 0.011 ppb             |                   |
| 166Er (KED) | 0.002 ppb             |                   |
| 169Tm (KED) | 0.001 ppb             |                   |
| 174Yb (KED) | 0.004 ppb             |                   |
| 175Lu (KED) | -0.113 ppb            |                   |
| 205Tl (KED) | 0.002 ppb             |                   |
| 208Pb (KED) | 0.555 ppb             |                   |
| 209Bi (KED) | 109.909 %             |                   |
| 232Th (KED) | 0.033 ppb             |                   |
| 238U (KED)  | 0.012 ppb             |                   |

| Category   | Concentration average | Intensity average | Intensity RSD |
|------------|-----------------------|-------------------|---------------|
| 6Li (KED)  | 137.923 %             | 3,654 cps         |               |
| 9Be (KED)  | -0.007 ppb            | 0 cps             |               |
| 11B (KED)  | 11.374 ppb            | 1,653 cps         |               |
| 24Mg (KED) | 137.820 ppb           | 92,998 cps        |               |
| 27Al (KED) | 114.252 ppb           | 20,654 cps        |               |

# Comprehensive

10/20/2021 6:11:31 PM

| Category    | Concentration average | Intensity average | Intensity RSD |
|-------------|-----------------------|-------------------|---------------|
| 45Sc (KED)  | 152.820 %             | 60,382 cps        |               |
| 51V (KED)   | 0.282 ppb             | 3,004 cps         |               |
| 52Cr (KED)  | 6.846 ppb             | 114,745 cps       |               |
| 55Mn (KED)  | 3.141 ppb             | 27,133 cps        |               |
| 56Fe (KED)  | 127.334 ppb           | 1,983,340 cps     |               |
| 58Ni (KED)  | 0.927 ppb             | 19,475 cps        |               |
| 59Co (KED)  | 0.063 ppb             | 2,160 cps         |               |
| 63Cu (KED)  | 2.115 ppb             | 53,220 cps        |               |
| 64Zn (KED)  | 67.564 ppb            | 511,661 cps       |               |
| 69Ga (KED)  | 0.523 ppb             | 4,361 cps         |               |
| 75As (KED)  | 0.066 ppb             | 160 cps           |               |
| 80Se (KED)  | 0.284 ppb             | 1,563 cps         |               |
| 85Rb (KED)  | 0.541 ppb             | 4,054 cps         |               |
| 88Sr (KED)  | 2.303 ppb             | 24,374 cps        |               |
| 89Y (KED)   | 144.953 %             | 532,490 cps       |               |
| 107Ag (KED) | 0.010 ppb             | 653 cps           |               |
| 114Cd (KED) | 0.006 ppb             | 200 cps           |               |
| 115In (KED) | 134.529 %             | 935,806 cps       |               |
| 133Cs (KED) | 0.015 ppb             | 553 cps           |               |
| 138Ba (KED) | 1.864 ppb             | 90,581 cps        |               |
| 139La (KED) | 0.138 ppb             | 14,348 cps        |               |
| 140Ce (KED) | 0.289 ppb             | 40,131 cps        |               |
| 141Pr (KED) | 0.031 ppb             | 4,574 cps         |               |
| 142Nd (KED) | 0.173 ppb             | 10,091 cps        |               |
| 152Sm (KED) | 0.018 ppb             | 960 cps           |               |
| 153Eu (KED) | 0.004 ppb             | 417 cps           |               |
| 158Gd (KED) | 0.015 ppb             | 1,100 cps         |               |
| 159Tb (KED) | 136.511 %             | 4,864,989 cps     |               |
| 164Dy (KED) | 0.011 ppb             | 880 cps           |               |
| 166Er (KED) | 0.002 ppb             | 820 cps           |               |
| 169Tm (KED) | 0.001 ppb             | 230 cps           |               |
| 174Yb (KED) | 0.004 ppb             | 510 cps           |               |
| 175Lu (KED) | -0.113 ppb            | 17,793 cps        |               |
| 205Tl (KED) | 0.002 ppb             | 327 cps           |               |
| 208Pb (KED) | 0.555 ppb             | 77,416 cps        |               |
| 209Bi (KED) | 109.909 %             | 3,503,624 cps     |               |
| 232Th (KED) | 0.033 ppb             | 8,279 cps         |               |
| 238U (KED)  | 0.012 ppb             | 3,510 cps         |               |

# Comprehensive

10/20/2021 6:11:31 PM

## Sample Summary

Instrument ID: iCAP Q

Analysis index: 42

Analysis name: 03025ti

Analysis started at: 10/20/2021 5:54:12 PM

User name: WINDOWS-UPCI4ER\Administrator

| Category    | Concentration average | Concentration RSD |
|-------------|-----------------------|-------------------|
| 6Li (KED)   | 123.826 %             |                   |
| 9Be (KED)   | -0.007 ppb            |                   |
| 11B (KED)   | 11.532 ppb            |                   |
| 24Mg (KED)  | 159.452 ppb           |                   |
| 27Al (KED)  | 132.355 ppb           |                   |
| 45Sc (KED)  | 145.853 %             |                   |
| 51V (KED)   | 0.258 ppb             |                   |
| 52Cr (KED)  | 0.507 ppb             |                   |
| 55Mn (KED)  | 3.357 ppb             |                   |
| 56Fe (KED)  | 145.652 ppb           |                   |
| 58Ni (KED)  | 0.827 ppb             |                   |
| 59Co (KED)  | 0.080 ppb             |                   |
| 63Cu (KED)  | 2.856 ppb             |                   |
| 64Zn (KED)  | 41.716 ppb            |                   |
| 69Ga (KED)  | 0.830 ppb             |                   |
| 75As (KED)  | 0.120 ppb             |                   |
| 80Se (KED)  | 0.797 ppb             |                   |
| 85Rb (KED)  | 0.571 ppb             |                   |
| 88Sr (KED)  | 2.207 ppb             |                   |
| 89Y (KED)   | 133.711 %             |                   |
| 107Ag (KED) | 0.025 ppb             |                   |
| 114Cd (KED) | 0.004 ppb             |                   |
| 115In (KED) | 128.018 %             |                   |
| 133Cs (KED) | 0.017 ppb             |                   |
| 138Ba (KED) | 2.879 ppb             |                   |
| 139La (KED) | 0.196 ppb             |                   |
| 140Ce (KED) | 0.423 ppb             |                   |
| 141Pr (KED) | 0.047 ppb             |                   |
| 142Nd (KED) | 0.270 ppb             |                   |
| 152Sm (KED) | 0.026 ppb             |                   |
| 153Eu (KED) | 0.005 ppb             |                   |
| 158Gd (KED) | 0.020 ppb             |                   |
| 159Tb (KED) | 131.969 %             |                   |
| 164Dy (KED) | 0.012 ppb             |                   |
| 166Er (KED) | 0.003 ppb             |                   |
| 169Tm (KED) | 0.001 ppb             |                   |
| 174Yb (KED) | 0.005 ppb             |                   |
| 175Lu (KED) | -0.117 ppb            |                   |
| 205Tl (KED) | 0.003 ppb             |                   |
| 208Pb (KED) | 0.342 ppb             |                   |
| 209Bi (KED) | 106.771 %             |                   |
| 232Th (KED) | 0.040 ppb             |                   |
| 238U (KED)  | 0.009 ppb             |                   |

| Category   | Concentration average | Intensity average | Intensity RSD |
|------------|-----------------------|-------------------|---------------|
| 6Li (KED)  | 123.826 %             | 3,280 cps         |               |
| 9Be (KED)  | -0.007 ppb            | 0 cps             |               |
| 11B (KED)  | 11.532 ppb            | 1,500 cps         |               |
| 24Mg (KED) | 159.452 ppb           | 96,582 cps        |               |
| 27Al (KED) | 132.355 ppb           | 22,818 cps        |               |

# Comprehensive

10/20/2021 6:11:31 PM

| Category    | Concentration average | Intensity average | Intensity RSD |
|-------------|-----------------------|-------------------|---------------|
| 45Sc (KED)  | 145.853 %             | 57,629 cps        |               |
| 51V (KED)   | 0.258 ppb             | 2,627 cps         |               |
| 52Cr (KED)  | 0.507 ppb             | 8,179 cps         |               |
| 55Mn (KED)  | 3.357 ppb             | 27,677 cps        |               |
| 56Fe (KED)  | 145.652 ppb           | 2,164,889 cps     |               |
| 58Ni (KED)  | 0.827 ppb             | 16,634 cps        |               |
| 59Co (KED)  | 0.080 ppb             | 2,600 cps         |               |
| 63Cu (KED)  | 2.856 ppb             | 65,991 cps        |               |
| 64Zn (KED)  | 41.716 ppb            | 291,839 cps       |               |
| 69Ga (KED)  | 0.830 ppb             | 6,338 cps         |               |
| 75As (KED)  | 0.120 ppb             | 250 cps           |               |
| 80Se (KED)  | 0.797 ppb             | 1,777 cps         |               |
| 85Rb (KED)  | 0.571 ppb             | 3,947 cps         |               |
| 88Sr (KED)  | 2.207 ppb             | 21,555 cps        |               |
| 89Y (KED)   | 133.711 %             | 491,193 cps       |               |
| 107Ag (KED) | 0.025 ppb             | 1,520 cps         |               |
| 114Cd (KED) | 0.004 ppb             | 160 cps           |               |
| 115In (KED) | 128.018 %             | 890,519 cps       |               |
| 133Cs (KED) | 0.017 ppb             | 593 cps           |               |
| 138Ba (KED) | 2.879 ppb             | 134,202 cps       |               |
| 139La (KED) | 0.196 ppb             | 19,595 cps        |               |
| 140Ce (KED) | 0.423 ppb             | 56,665 cps        |               |
| 141Pr (KED) | 0.047 ppb             | 6,708 cps         |               |
| 142Nd (KED) | 0.270 ppb             | 15,263 cps        |               |
| 152Sm (KED) | 0.026 ppb             | 1,297 cps         |               |
| 153Eu (KED) | 0.005 ppb             | 557 cps           |               |
| 158Gd (KED) | 0.020 ppb             | 1,360 cps         |               |
| 159Tb (KED) | 131.969 %             | 4,703,113 cps     |               |
| 164Dy (KED) | 0.012 ppb             | 977 cps           |               |
| 166Er (KED) | 0.003 ppb             | 883 cps           |               |
| 169Tm (KED) | 0.001 ppb             | 290 cps           |               |
| 174Yb (KED) | 0.005 ppb             | 560 cps           |               |
| 175Lu (KED) | -0.117 ppb            | 16,531 cps        |               |
| 205Tl (KED) | 0.003 ppb             | 490 cps           |               |
| 208Pb (KED) | 0.342 ppb             | 48,314 cps        |               |
| 209Bi (KED) | 106.771 %             | 3,403,567 cps     |               |
| 232Th (KED) | 0.040 ppb             | 9,914 cps         |               |
| 238U (KED)  | 0.009 ppb             | 2,807 cps         |               |

# Comprehensive

10/20/2021 6:11:31 PM

## Sample Summary

Instrument ID: iCAP Q

Analysis index: 43

Analysis name: 03251ti

Analysis started at: 10/20/2021 5:56:05 PM

User name: WINDOWS-UPCI4ER\Administrator

| Category    | Concentration average | Concentration RSD |
|-------------|-----------------------|-------------------|
| 6Li (KED)   | 128.106 %             |                   |
| 9Be (KED)   | 0.011 ppb             |                   |
| 11B (KED)   | 7.267 ppb             |                   |
| 24Mg (KED)  | 218.740 ppb           |                   |
| 27Al (KED)  | 183.631 ppb           |                   |
| 45Sc (KED)  | 146.590 %             |                   |
| 51V (KED)   | 0.377 ppb             |                   |
| 52Cr (KED)  | 0.611 ppb             |                   |
| 55Mn (KED)  | 5.015 ppb             |                   |
| 56Fe (KED)  | 210.372 ppb           |                   |
| 58Ni (KED)  | 1.037 ppb             |                   |
| 59Co (KED)  | 0.099 ppb             |                   |
| 63Cu (KED)  | 2.451 ppb             |                   |
| 64Zn (KED)  | 43.809 ppb            |                   |
| 69Ga (KED)  | 0.905 ppb             |                   |
| 75As (KED)  | 0.165 ppb             |                   |
| 80Se (KED)  | 0.654 ppb             |                   |
| 85Rb (KED)  | 0.922 ppb             |                   |
| 88Sr (KED)  | 3.595 ppb             |                   |
| 89Y (KED)   | 132.906 %             |                   |
| 107Ag (KED) | 0.011 ppb             |                   |
| 114Cd (KED) | 0.006 ppb             |                   |
| 115In (KED) | 124.273 %             |                   |
| 133Cs (KED) | 0.021 ppb             |                   |
| 138Ba (KED) | 3.500 ppb             |                   |
| 139La (KED) | 0.230 ppb             |                   |
| 140Ce (KED) | 0.479 ppb             |                   |
| 141Pr (KED) | 0.057 ppb             |                   |
| 142Nd (KED) | 0.293 ppb             |                   |
| 152Sm (KED) | 0.035 ppb             |                   |
| 153Eu (KED) | 0.007 ppb             |                   |
| 158Gd (KED) | 0.028 ppb             |                   |
| 159Tb (KED) | 122.867 %             |                   |
| 164Dy (KED) | 0.021 ppb             |                   |
| 166Er (KED) | 0.006 ppb             |                   |
| 169Tm (KED) | 0.001 ppb             |                   |
| 174Yb (KED) | 0.008 ppb             |                   |
| 175Lu (KED) | -0.109 ppb            |                   |
| 205Tl (KED) | 0.003 ppb             |                   |
| 208Pb (KED) | 0.391 ppb             |                   |
| 209Bi (KED) | 103.640 %             |                   |
| 232Th (KED) | 0.053 ppb             |                   |
| 238U (KED)  | 0.013 ppb             |                   |

| Category   | Concentration average | Intensity average | Intensity RSD |
|------------|-----------------------|-------------------|---------------|
| 6Li (KED)  | 128.106 %             | 3,394 cps         |               |
| 9Be (KED)  | 0.011 ppb             | 3 cps             |               |
| 11B (KED)  | 7.267 ppb             | 1,117 cps         |               |
| 24Mg (KED) | 218.740 ppb           | 137,032 cps       |               |
| 27Al (KED) | 183.631 ppb           | 31,774 cps        |               |

# Comprehensive

10/20/2021 6:11:31 PM

| Category    | Concentration average | Intensity average | Intensity RSD |
|-------------|-----------------------|-------------------|---------------|
| 45Sc (KED)  | 146.590 %             | 57,921 cps        |               |
| 51V (KED)   | 0.377 ppb             | 3,857 cps         |               |
| 52Cr (KED)  | 0.611 ppb             | 9,894 cps         |               |
| 55Mn (KED)  | 5.015 ppb             | 41,526 cps        |               |
| 56Fe (KED)  | 210.372 ppb           | 3,141,580 cps     |               |
| 58Ni (KED)  | 1.037 ppb             | 20,851 cps        |               |
| 59Co (KED)  | 0.099 ppb             | 3,240 cps         |               |
| 63Cu (KED)  | 2.451 ppb             | 56,400 cps        |               |
| 64Zn (KED)  | 43.809 ppb            | 304,579 cps       |               |
| 69Ga (KED)  | 0.905 ppb             | 6,859 cps         |               |
| 75As (KED)  | 0.165 ppb             | 333 cps           |               |
| 80Se (KED)  | 0.654 ppb             | 1,673 cps         |               |
| 85Rb (KED)  | 0.922 ppb             | 6,318 cps         |               |
| 88Sr (KED)  | 3.595 ppb             | 34,752 cps        |               |
| 89Y (KED)   | 132.906 %             | 488,236 cps       |               |
| 107Ag (KED) | 0.011 ppb             | 637 cps           |               |
| 114Cd (KED) | 0.006 ppb             | 197 cps           |               |
| 115In (KED) | 124.273 %             | 864,466 cps       |               |
| 133Cs (KED) | 0.021 ppb             | 697 cps           |               |
| 138Ba (KED) | 3.500 ppb             | 151,534 cps       |               |
| 139La (KED) | 0.230 ppb             | 21,495 cps        |               |
| 140Ce (KED) | 0.479 ppb             | 59,666 cps        |               |
| 141Pr (KED) | 0.057 ppb             | 7,452 cps         |               |
| 142Nd (KED) | 0.293 ppb             | 15,390 cps        |               |
| 152Sm (KED) | 0.035 ppb             | 1,663 cps         |               |
| 153Eu (KED) | 0.007 ppb             | 683 cps           |               |
| 158Gd (KED) | 0.028 ppb             | 1,807 cps         |               |
| 159Tb (KED) | 122.867 %             | 4,378,763 cps     |               |
| 164Dy (KED) | 0.021 ppb             | 1,517 cps         |               |
| 166Er (KED) | 0.006 ppb             | 1,073 cps         |               |
| 169Tm (KED) | 0.001 ppb             | 347 cps           |               |
| 174Yb (KED) | 0.008 ppb             | 813 cps           |               |
| 175Lu (KED) | -0.109 ppb            | 16,755 cps        |               |
| 205Tl (KED) | 0.003 ppb             | 567 cps           |               |
| 208Pb (KED) | 0.391 ppb             | 52,862 cps        |               |
| 209Bi (KED) | 103.640 %             | 3,303,780 cps     |               |
| 232Th (KED) | 0.053 ppb             | 12,463 cps        |               |
| 238U (KED)  | 0.013 ppb             | 3,694 cps         |               |

# Comprehensive

10/20/2021 6:11:31 PM

## Sample Summary

Instrument ID: iCAP Q

Analysis index: 44

Analysis name: 03261ti

Analysis started at: 10/20/2021 5:58:02 PM

User name: WINDOWS-UPCI4ER\Administrator

| Category    | Concentration average | Concentration RSD |
|-------------|-----------------------|-------------------|
| 6Li (KED)   | 122.442 %             |                   |
| 9Be (KED)   | -0.007 ppb            |                   |
| 11B (KED)   | 4.766 ppb             |                   |
| 24Mg (KED)  | 149.498 ppb           |                   |
| 27Al (KED)  | 103.027 ppb           |                   |
| 45Sc (KED)  | 143.166 %             |                   |
| 51V (KED)   | 0.207 ppb             |                   |
| 52Cr (KED)  | 0.386 ppb             |                   |
| 55Mn (KED)  | 2.845 ppb             |                   |
| 56Fe (KED)  | 112.536 ppb           |                   |
| 58Ni (KED)  | 0.845 ppb             |                   |
| 59Co (KED)  | 0.062 ppb             |                   |
| 63Cu (KED)  | 2.575 ppb             |                   |
| 64Zn (KED)  | 42.665 ppb            |                   |
| 69Ga (KED)  | 0.536 ppb             |                   |
| 75As (KED)  | 0.085 ppb             |                   |
| 80Se (KED)  | 0.420 ppb             |                   |
| 85Rb (KED)  | 0.619 ppb             |                   |
| 88Sr (KED)  | 2.566 ppb             |                   |
| 89Y (KED)   | 133.097 %             |                   |
| 107Ag (KED) | 0.043 ppb             |                   |
| 114Cd (KED) | 0.005 ppb             |                   |
| 115In (KED) | 122.299 %             |                   |
| 133Cs (KED) | 0.014 ppb             |                   |
| 138Ba (KED) | 1.988 ppb             |                   |
| 139La (KED) | 0.119 ppb             |                   |
| 140Ce (KED) | 0.246 ppb             |                   |
| 141Pr (KED) | 0.028 ppb             |                   |
| 142Nd (KED) | 0.154 ppb             |                   |
| 152Sm (KED) | 0.019 ppb             |                   |
| 153Eu (KED) | 0.004 ppb             |                   |
| 158Gd (KED) | 0.014 ppb             |                   |
| 159Tb (KED) | 122.103 %             |                   |
| 164Dy (KED) | 0.009 ppb             |                   |
| 166Er (KED) | 0.001 ppb             |                   |
| 169Tm (KED) | 0.001 ppb             |                   |
| 174Yb (KED) | 0.004 ppb             |                   |
| 175Lu (KED) | -0.113 ppb            |                   |
| 205Tl (KED) | 0.002 ppb             |                   |
| 208Pb (KED) | 0.407 ppb             |                   |
| 209Bi (KED) | 103.633 %             |                   |
| 232Th (KED) | 0.029 ppb             |                   |
| 238U (KED)  | 0.008 ppb             |                   |

| Category   | Concentration average | Intensity average | Intensity RSD |
|------------|-----------------------|-------------------|---------------|
| 6Li (KED)  | 122.442 %             | 3,244 cps         |               |
| 9Be (KED)  | -0.007 ppb            | 0 cps             |               |
| 11B (KED)  | 4.766 ppb             | 823 cps           |               |
| 24Mg (KED) | 149.498 ppb           | 89,547 cps        |               |
| 27Al (KED) | 103.027 ppb           | 17,459 cps        |               |

# Comprehensive

10/20/2021 6:11:31 PM

| Category    | Concentration average | Intensity average | Intensity RSD |
|-------------|-----------------------|-------------------|---------------|
| 45Sc (KED)  | 143.166 %             | 56,568 cps        |               |
| 51V (KED)   | 0.207 ppb             | 2,067 cps         |               |
| 52Cr (KED)  | 0.386 ppb             | 6,138 cps         |               |
| 55Mn (KED)  | 2.845 ppb             | 23,028 cps        |               |
| 56Fe (KED)  | 112.536 ppb           | 1,642,402 cps     |               |
| 58Ni (KED)  | 0.845 ppb             | 16,661 cps        |               |
| 59Co (KED)  | 0.062 ppb             | 2,000 cps         |               |
| 63Cu (KED)  | 2.575 ppb             | 59,307 cps        |               |
| 64Zn (KED)  | 42.665 ppb            | 297,082 cps       |               |
| 69Ga (KED)  | 0.536 ppb             | 4,104 cps         |               |
| 75As (KED)  | 0.085 ppb             | 183 cps           |               |
| 80Se (KED)  | 0.420 ppb             | 1,523 cps         |               |
| 85Rb (KED)  | 0.619 ppb             | 4,254 cps         |               |
| 88Sr (KED)  | 2.566 ppb             | 24,912 cps        |               |
| 89Y (KED)   | 133.097 %             | 488,937 cps       |               |
| 107Ag (KED) | 0.043 ppb             | 2,510 cps         |               |
| 114Cd (KED) | 0.005 ppb             | 167 cps           |               |
| 115In (KED) | 122.299 %             | 850,733 cps       |               |
| 133Cs (KED) | 0.014 ppb             | 453 cps           |               |
| 138Ba (KED) | 1.988 ppb             | 86,268 cps        |               |
| 139La (KED) | 0.119 ppb             | 11,022 cps        |               |
| 140Ce (KED) | 0.246 ppb             | 30,561 cps        |               |
| 141Pr (KED) | 0.028 ppb             | 3,691 cps         |               |
| 142Nd (KED) | 0.154 ppb             | 8,046 cps         |               |
| 152Sm (KED) | 0.019 ppb             | 877 cps           |               |
| 153Eu (KED) | 0.004 ppb             | 343 cps           |               |
| 158Gd (KED) | 0.014 ppb             | 890 cps           |               |
| 159Tb (KED) | 122.103 %             | 4,351,501 cps     |               |
| 164Dy (KED) | 0.009 ppb             | 697 cps           |               |
| 166Er (KED) | 0.001 ppb             | 640 cps           |               |
| 169Tm (KED) | 0.001 ppb             | 203 cps           |               |
| 174Yb (KED) | 0.004 ppb             | 427 cps           |               |
| 175Lu (KED) | -0.113 ppb            | 15,964 cps        |               |
| 205Tl (KED) | 0.002 ppb             | 340 cps           |               |
| 208Pb (KED) | 0.407 ppb             | 54,780 cps        |               |
| 209Bi (KED) | 103.633 %             | 3,303,554 cps     |               |
| 232Th (KED) | 0.029 ppb             | 6,962 cps         |               |
| 238U (KED)  | 0.008 ppb             | 2,450 cps         |               |

# Comprehensive

10/20/2021 6:11:31 PM

## Sample Summary

Instrument ID: iCAP Q

Analysis index: 45

Analysis name: 03010ti

Analysis started at: 10/20/2021 5:59:57 PM

User name: WINDOWS-UPCI4ER\Administrator

| Category    | Concentration average | Concentration RSD |
|-------------|-----------------------|-------------------|
| 6Li (KED)   | 64.300 %              |                   |
| 9Be (KED)   | -0.007 ppb            |                   |
| 11B (KED)   | -0.422 ppb            |                   |
| 24Mg (KED)  | 443.319 ppb           |                   |
| 27Al (KED)  | 388.616 ppb           |                   |
| 45Sc (KED)  | 76.398 %              |                   |
| 51V (KED)   | 0.786 ppb             |                   |
| 52Cr (KED)  | 1.006 ppb             |                   |
| 55Mn (KED)  | 11.035 ppb            |                   |
| 56Fe (KED)  | 421.620 ppb           |                   |
| 58Ni (KED)  | 2.040 ppb             |                   |
| 59Co (KED)  | 0.200 ppb             |                   |
| 63Cu (KED)  | 4.722 ppb             |                   |
| 64Zn (KED)  | 73.985 ppb            |                   |
| 69Ga (KED)  | 1.673 ppb             |                   |
| 75As (KED)  | 0.165 ppb             |                   |
| 80Se (KED)  | 2.740 ppb             |                   |
| 85Rb (KED)  | 1.142 ppb             |                   |
| 88Sr (KED)  | 7.648 ppb             |                   |
| 89Y (KED)   | 70.413 %              |                   |
| 107Ag (KED) | 0.015 ppb             |                   |
| 114Cd (KED) | 0.016 ppb             |                   |
| 115In (KED) | 64.429 %              |                   |
| 133Cs (KED) | 0.057 ppb             |                   |
| 138Ba (KED) | 6.357 ppb             |                   |
| 139La (KED) | 0.526 ppb             |                   |
| 140Ce (KED) | 1.047 ppb             |                   |
| 141Pr (KED) | 0.122 ppb             |                   |
| 142Nd (KED) | 0.645 ppb             |                   |
| 152Sm (KED) | 0.079 ppb             |                   |
| 153Eu (KED) | 0.015 ppb             |                   |
| 158Gd (KED) | 0.059 ppb             |                   |
| 159Tb (KED) | 62.131 %              |                   |
| 164Dy (KED) | 0.044 ppb             |                   |
| 166Er (KED) | 0.019 ppb             |                   |
| 169Tm (KED) | 0.003 ppb             |                   |
| 174Yb (KED) | 0.016 ppb             |                   |
| 175Lu (KED) | -0.104 ppb            |                   |
| 205Tl (KED) | 0.005 ppb             |                   |
| 208Pb (KED) | 0.746 ppb             |                   |
| 209Bi (KED) | 54.025 %              |                   |
| 232Th (KED) | 0.124 ppb             |                   |
| 238U (KED)  | 0.024 ppb             |                   |

| Category   | Concentration average | Intensity average | Intensity RSD |
|------------|-----------------------|-------------------|---------------|
| 6Li (KED)  | 64.300 %              | 1,703 cps         |               |
| 9Be (KED)  | -0.007 ppb            | 0 cps             |               |
| 11B (KED)  | -0.422 ppb            | 167 cps           |               |
| 24Mg (KED) | 443.319 ppb           | 139,341 cps       |               |
| 27Al (KED) | 388.616 ppb           | 34,979 cps        |               |

# Comprehensive

10/20/2021 6:11:31 PM

| Category    | Concentration average | Intensity average | Intensity RSD |
|-------------|-----------------------|-------------------|---------------|
| 45Sc (KED)  | 76.398 %              | 30,186 cps        |               |
| 51V (KED)   | 0.786 ppb             | 4,187 cps         |               |
| 52Cr (KED)  | 1.006 ppb             | 8,466 cps         |               |
| 55Mn (KED)  | 11.035 ppb            | 47,587 cps        |               |
| 56Fe (KED)  | 421.620 ppb           | 3,280,139 cps     |               |
| 58Ni (KED)  | 2.040 ppb             | 21,168 cps        |               |
| 59Co (KED)  | 0.200 ppb             | 3,390 cps         |               |
| 63Cu (KED)  | 4.722 ppb             | 57,147 cps        |               |
| 64Zn (KED)  | 73.985 ppb            | 272,115 cps       |               |
| 69Ga (KED)  | 1.673 ppb             | 6,675 cps         |               |
| 75As (KED)  | 0.165 ppb             | 177 cps           |               |
| 80Se (KED)  | 2.740 ppb             | 1,603 cps         |               |
| 85Rb (KED)  | 1.142 ppb             | 4,144 cps         |               |
| 88Sr (KED)  | 7.648 ppb             | 39,034 cps        |               |
| 89Y (KED)   | 70.413 %              | 258,666 cps       |               |
| 107Ag (KED) | 0.015 ppb             | 457 cps           |               |
| 114Cd (KED) | 0.016 ppb             | 213 cps           |               |
| 115In (KED) | 64.429 %              | 448,179 cps       |               |
| 133Cs (KED) | 0.057 ppb             | 957 cps           |               |
| 138Ba (KED) | 6.357 ppb             | 138,479 cps       |               |
| 139La (KED) | 0.526 ppb             | 24,788 cps        |               |
| 140Ce (KED) | 1.047 ppb             | 65,907 cps        |               |
| 141Pr (KED) | 0.122 ppb             | 8,109 cps         |               |
| 142Nd (KED) | 0.645 ppb             | 17,138 cps        |               |
| 152Sm (KED) | 0.079 ppb             | 1,873 cps         |               |
| 153Eu (KED) | 0.015 ppb             | 733 cps           |               |
| 158Gd (KED) | 0.059 ppb             | 1,913 cps         |               |
| 159Tb (KED) | 62.131 %              | 2,214,244 cps     |               |
| 164Dy (KED) | 0.044 ppb             | 1,590 cps         |               |
| 166Er (KED) | 0.019 ppb             | 1,077 cps         |               |
| 169Tm (KED) | 0.003 ppb             | 427 cps           |               |
| 174Yb (KED) | 0.016 ppb             | 813 cps           |               |
| 175Lu (KED) | -0.104 ppb            | 8,897 cps         |               |
| 205Tl (KED) | 0.005 ppb             | 453 cps           |               |
| 208Pb (KED) | 0.746 ppb             | 50,238 cps        |               |
| 209Bi (KED) | 54.025 %              | 1,722,183 cps     |               |
| 232Th (KED) | 0.124 ppb             | 15,339 cps        |               |
| 238U (KED)  | 0.024 ppb             | 3,611 cps         |               |

# Comprehensive

10/20/2021 6:11:31 PM

## Sample Summary

Instrument ID: iCAP Q

Analysis index: 46

Analysis name: 03264ti

Analysis started at: 10/20/2021 6:01:49 PM

User name: WINDOWS-UPCI4ER\Administrator

| Category    | Concentration average | Concentration RSD |
|-------------|-----------------------|-------------------|
| 6Li (KED)   | 59.392 %              |                   |
| 9Be (KED)   | 0.031 ppb             |                   |
| 11B (KED)   | 0.270 ppb             |                   |
| 24Mg (KED)  | 417.010 ppb           |                   |
| 27Al (KED)  | 355.060 ppb           |                   |
| 45Sc (KED)  | 78.293 %              |                   |
| 51V (KED)   | 0.680 ppb             |                   |
| 52Cr (KED)  | 1.672 ppb             |                   |
| 55Mn (KED)  | 8.400 ppb             |                   |
| 56Fe (KED)  | 393.552 ppb           |                   |
| 58Ni (KED)  | 2.015 ppb             |                   |
| 59Co (KED)  | 0.187 ppb             |                   |
| 63Cu (KED)  | 5.052 ppb             |                   |
| 64Zn (KED)  | 71.005 ppb            |                   |
| 69Ga (KED)  | 1.620 ppb             |                   |
| 75As (KED)  | 0.310 ppb             |                   |
| 80Se (KED)  | 2.613 ppb             |                   |
| 85Rb (KED)  | 1.157 ppb             |                   |
| 88Sr (KED)  | 5.581 ppb             |                   |
| 89Y (KED)   | 71.633 %              |                   |
| 107Ag (KED) | 0.067 ppb             |                   |
| 114Cd (KED) | 0.013 ppb             |                   |
| 115In (KED) | 66.588 %              |                   |
| 133Cs (KED) | 0.040 ppb             |                   |
| 138Ba (KED) | 6.398 ppb             |                   |
| 139La (KED) | 0.465 ppb             |                   |
| 140Ce (KED) | 0.928 ppb             |                   |
| 141Pr (KED) | 0.110 ppb             |                   |
| 142Nd (KED) | 0.569 ppb             |                   |
| 152Sm (KED) | 0.065 ppb             |                   |
| 153Eu (KED) | 0.013 ppb             |                   |
| 158Gd (KED) | 0.050 ppb             |                   |
| 159Tb (KED) | 63.918 %              |                   |
| 164Dy (KED) | 0.037 ppb             |                   |
| 166Er (KED) | 0.016 ppb             |                   |
| 169Tm (KED) | 0.002 ppb             |                   |
| 174Yb (KED) | 0.014 ppb             |                   |
| 175Lu (KED) | -0.111 ppb            |                   |
| 205Tl (KED) | 0.005 ppb             |                   |
| 208Pb (KED) | 0.680 ppb             |                   |
| 209Bi (KED) | 55.312 %              |                   |
| 232Th (KED) | 0.097 ppb             |                   |
| 238U (KED)  | 0.027 ppb             |                   |

| Category   | Concentration average | Intensity average | Intensity RSD |
|------------|-----------------------|-------------------|---------------|
| 6Li (KED)  | 59.392 %              | 1,573 cps         |               |
| 9Be (KED)  | 0.031 ppb             | 3 cps             |               |
| 11B (KED)  | 0.270 ppb             | 187 cps           |               |
| 24Mg (KED) | 417.010 ppb           | 121,071 cps       |               |
| 27Al (KED) | 355.060 ppb           | 32,756 cps        |               |

# Comprehensive

10/20/2021 6:11:31 PM

| Category    | Concentration average | Intensity average | Intensity RSD |
|-------------|-----------------------|-------------------|---------------|
| 45Sc (KED)  | 78.293 %              | 30,935 cps        |               |
| 51V (KED)   | 0.680 ppb             | 3,711 cps         |               |
| 52Cr (KED)  | 1.672 ppb             | 14,385 cps        |               |
| 55Mn (KED)  | 8.400 ppb             | 37,128 cps        |               |
| 56Fe (KED)  | 393.552 ppb           | 3,137,779 cps     |               |
| 58Ni (KED)  | 2.015 ppb             | 21,428 cps        |               |
| 59Co (KED)  | 0.187 ppb             | 3,244 cps         |               |
| 63Cu (KED)  | 5.052 ppb             | 62,161 cps        |               |
| 64Zn (KED)  | 71.005 ppb            | 265,703 cps       |               |
| 69Ga (KED)  | 1.620 ppb             | 6,578 cps         |               |
| 75As (KED)  | 0.310 ppb             | 327 cps           |               |
| 80Se (KED)  | 2.613 ppb             | 1,587 cps         |               |
| 85Rb (KED)  | 1.157 ppb             | 4,271 cps         |               |
| 88Sr (KED)  | 5.581 ppb             | 29,014 cps        |               |
| 89Y (KED)   | 71.633 %              | 263,147 cps       |               |
| 107Ag (KED) | 0.067 ppb             | 2,130 cps         |               |
| 114Cd (KED) | 0.013 ppb             | 190 cps           |               |
| 115In (KED) | 66.588 %              | 463,198 cps       |               |
| 133Cs (KED) | 0.040 ppb             | 700 cps           |               |
| 138Ba (KED) | 6.398 ppb             | 143,380 cps       |               |
| 139La (KED) | 0.465 ppb             | 22,547 cps        |               |
| 140Ce (KED) | 0.928 ppb             | 60,104 cps        |               |
| 141Pr (KED) | 0.110 ppb             | 7,516 cps         |               |
| 142Nd (KED) | 0.569 ppb             | 15,553 cps        |               |
| 152Sm (KED) | 0.065 ppb             | 1,587 cps         |               |
| 153Eu (KED) | 0.013 ppb             | 630 cps           |               |
| 158Gd (KED) | 0.050 ppb             | 1,657 cps         |               |
| 159Tb (KED) | 63.918 %              | 2,277,916 cps     |               |
| 164Dy (KED) | 0.037 ppb             | 1,380 cps         |               |
| 166Er (KED) | 0.016 ppb             | 970 cps           |               |
| 169Tm (KED) | 0.002 ppb             | 367 cps           |               |
| 174Yb (KED) | 0.014 ppb             | 770 cps           |               |
| 175Lu (KED) | -0.111 ppb            | 8,500 cps         |               |
| 205Tl (KED) | 0.005 ppb             | 493 cps           |               |
| 208Pb (KED) | 0.680 ppb             | 47,122 cps        |               |
| 209Bi (KED) | 55.312 %              | 1,763,189 cps     |               |
| 232Th (KED) | 0.097 ppb             | 12,223 cps        |               |
| 238U (KED)  | 0.027 ppb             | 4,017 cps         |               |

# Comprehensive

10/20/2021 6:11:31 PM

## Sample Summary

Instrument ID: iCAP Q

Analysis index: 47

Analysis name: 03254ti

Analysis started at: 10/20/2021 6:03:38 PM

User name: WINDOWS-UPCI4ER\Administrator

| Category    | Concentration average | Concentration RSD |
|-------------|-----------------------|-------------------|
| 6Li (KED)   | 70.592 %              |                   |
| 9Be (KED)   | -0.007 ppb            |                   |
| 11B (KED)   | 2.193 ppb             |                   |
| 24Mg (KED)  | 332.443 ppb           |                   |
| 27Al (KED)  | 279.534 ppb           |                   |
| 45Sc (KED)  | 78.978 %              |                   |
| 51V (KED)   | 0.584 ppb             |                   |
| 52Cr (KED)  | 0.769 ppb             |                   |
| 55Mn (KED)  | 7.244 ppb             |                   |
| 56Fe (KED)  | 324.987 ppb           |                   |
| 58Ni (KED)  | 1.469 ppb             |                   |
| 59Co (KED)  | 0.138 ppb             |                   |
| 63Cu (KED)  | 4.195 ppb             |                   |
| 64Zn (KED)  | 75.356 ppb            |                   |
| 69Ga (KED)  | 1.622 ppb             |                   |
| 75As (KED)  | 0.263 ppb             |                   |
| 80Se (KED)  | 2.548 ppb             |                   |
| 85Rb (KED)  | 1.514 ppb             |                   |
| 88Sr (KED)  | 5.383 ppb             |                   |
| 89Y (KED)   | 72.817 %              |                   |
| 107Ag (KED) | 0.020 ppb             |                   |
| 114Cd (KED) | 0.010 ppb             |                   |
| 115In (KED) | 66.567 %              |                   |
| 133Cs (KED) | 0.045 ppb             |                   |
| 138Ba (KED) | 5.839 ppb             |                   |
| 139La (KED) | 0.411 ppb             |                   |
| 140Ce (KED) | 0.831 ppb             |                   |
| 141Pr (KED) | 0.098 ppb             |                   |
| 142Nd (KED) | 0.495 ppb             |                   |
| 152Sm (KED) | 0.058 ppb             |                   |
| 153Eu (KED) | 0.011 ppb             |                   |
| 158Gd (KED) | 0.047 ppb             |                   |
| 159Tb (KED) | 66.955 %              |                   |
| 164Dy (KED) | 0.032 ppb             |                   |
| 166Er (KED) | 0.015 ppb             |                   |
| 169Tm (KED) | 0.002 ppb             |                   |
| 174Yb (KED) | 0.013 ppb             |                   |
| 175Lu (KED) | -0.107 ppb            |                   |
| 205Tl (KED) | 0.007 ppb             |                   |
| 208Pb (KED) | 0.564 ppb             |                   |
| 209Bi (KED) | 56.694 %              |                   |
| 232Th (KED) | 0.089 ppb             |                   |
| 238U (KED)  | 0.022 ppb             |                   |

| Category   | Concentration average | Intensity average | Intensity RSD |
|------------|-----------------------|-------------------|---------------|
| 6Li (KED)  | 70.592 %              | 1,870 cps         |               |
| 9Be (KED)  | -0.007 ppb            | 0 cps             |               |
| 11B (KED)  | 2.193 ppb             | 330 cps           |               |
| 24Mg (KED) | 332.443 ppb           | 114,731 cps       |               |
| 27Al (KED) | 279.534 ppb           | 26,027 cps        |               |

# Comprehensive

10/20/2021 6:11:31 PM

| Category    | Concentration average | Intensity average | Intensity RSD |
|-------------|-----------------------|-------------------|---------------|
| 45Sc (KED)  | 78.978 %              | 31,206 cps        |               |
| 51V (KED)   | 0.584 ppb             | 3,214 cps         |               |
| 52Cr (KED)  | 0.769 ppb             | 6,698 cps         |               |
| 55Mn (KED)  | 7.244 ppb             | 32,302 cps        |               |
| 56Fe (KED)  | 324.987 ppb           | 2,614,014 cps     |               |
| 58Ni (KED)  | 1.469 ppb             | 15,817 cps        |               |
| 59Co (KED)  | 0.138 ppb             | 2,427 cps         |               |
| 63Cu (KED)  | 4.195 ppb             | 52,547 cps        |               |
| 64Zn (KED)  | 75.356 ppb            | 286,609 cps       |               |
| 69Ga (KED)  | 1.622 ppb             | 6,695 cps         |               |
| 75As (KED)  | 0.263 ppb             | 283 cps           |               |
| 80Se (KED)  | 2.548 ppb             | 1,590 cps         |               |
| 85Rb (KED)  | 1.514 ppb             | 5,678 cps         |               |
| 88Sr (KED)  | 5.383 ppb             | 28,452 cps        |               |
| 89Y (KED)   | 72.817 %              | 267,497 cps       |               |
| 107Ag (KED) | 0.020 ppb             | 633 cps           |               |
| 114Cd (KED) | 0.010 ppb             | 157 cps           |               |
| 115In (KED) | 66.567 %              | 463,052 cps       |               |
| 133Cs (KED) | 0.045 ppb             | 783 cps           |               |
| 138Ba (KED) | 5.839 ppb             | 137,156 cps       |               |
| 139La (KED) | 0.411 ppb             | 20,871 cps        |               |
| 140Ce (KED) | 0.831 ppb             | 56,377 cps        |               |
| 141Pr (KED) | 0.098 ppb             | 7,035 cps         |               |
| 142Nd (KED) | 0.495 ppb             | 14,185 cps        |               |
| 152Sm (KED) | 0.058 ppb             | 1,477 cps         |               |
| 153Eu (KED) | 0.011 ppb             | 590 cps           |               |
| 158Gd (KED) | 0.047 ppb             | 1,633 cps         |               |
| 159Tb (KED) | 66.955 %              | 2,386,141 cps     |               |
| 164Dy (KED) | 0.032 ppb             | 1,263 cps         |               |
| 166Er (KED) | 0.015 ppb             | 983 cps           |               |
| 169Tm (KED) | 0.002 ppb             | 363 cps           |               |
| 174Yb (KED) | 0.013 ppb             | 717 cps           |               |
| 175Lu (KED) | -0.107 ppb            | 9,293 cps         |               |
| 205Tl (KED) | 0.007 ppb             | 623 cps           |               |
| 208Pb (KED) | 0.564 ppb             | 40,476 cps        |               |
| 209Bi (KED) | 56.694 %              | 1,807,255 cps     |               |
| 232Th (KED) | 0.089 ppb             | 11,519 cps        |               |
| 238U (KED)  | 0.022 ppb             | 3,357 cps         |               |

# Comprehensive

10/20/2021 6:11:31 PM

## Sample Summary

Instrument ID: iCAP Q

Analysis index: 48

Analysis name: 03258ti

Analysis started at: 10/20/2021 6:05:30 PM

User name: WINDOWS-UPCI4ER\Administrator

| Category    | Concentration average | Concentration RSD |
|-------------|-----------------------|-------------------|
| 6Li (KED)   | 67.572 %              |                   |
| 9Be (KED)   | 0.026 ppb             |                   |
| 11B (KED)   | 1.093 ppb             |                   |
| 24Mg (KED)  | 480.875 ppb           |                   |
| 27Al (KED)  | 525.233 ppb           |                   |
| 45Sc (KED)  | 75.172 %              |                   |
| 51V (KED)   | 1.035 ppb             |                   |
| 52Cr (KED)  | 1.318 ppb             |                   |
| 55Mn (KED)  | 12.751 ppb            |                   |
| 56Fe (KED)  | 609.078 ppb           |                   |
| 58Ni (KED)  | 2.265 ppb             |                   |
| 59Co (KED)  | 0.238 ppb             |                   |
| 63Cu (KED)  | 3.867 ppb             |                   |
| 64Zn (KED)  | 71.531 ppb            |                   |
| 69Ga (KED)  | 1.850 ppb             |                   |
| 75As (KED)  | 0.241 ppb             |                   |
| 80Se (KED)  | 2.591 ppb             |                   |
| 85Rb (KED)  | 1.467 ppb             |                   |
| 88Sr (KED)  | 7.708 ppb             |                   |
| 89Y (KED)   | 70.763 %              |                   |
| 107Ag (KED) | 0.018 ppb             |                   |
| 114Cd (KED) | 0.018 ppb             |                   |
| 115In (KED) | 64.551 %              |                   |
| 133Cs (KED) | 0.068 ppb             |                   |
| 138Ba (KED) | 7.361 ppb             |                   |
| 139La (KED) | 0.578 ppb             |                   |
| 140Ce (KED) | 1.206 ppb             |                   |
| 141Pr (KED) | 0.145 ppb             |                   |
| 142Nd (KED) | 0.763 ppb             |                   |
| 152Sm (KED) | 0.105 ppb             |                   |
| 153Eu (KED) | 0.022 ppb             |                   |
| 158Gd (KED) | 0.081 ppb             |                   |
| 159Tb (KED) | 60.609 %              |                   |
| 164Dy (KED) | 0.062 ppb             |                   |
| 166Er (KED) | 0.028 ppb             |                   |
| 169Tm (KED) | 0.004 ppb             |                   |
| 174Yb (KED) | 0.021 ppb             |                   |
| 175Lu (KED) | -0.103 ppb            |                   |
| 205Tl (KED) | 0.007 ppb             |                   |
| 208Pb (KED) | 0.615 ppb             |                   |
| 209Bi (KED) | 53.486 %              |                   |
| 232Th (KED) | 0.145 ppb             |                   |
| 238U (KED)  | 0.033 ppb             |                   |

| Category   | Concentration average | Intensity average | Intensity RSD |
|------------|-----------------------|-------------------|---------------|
| 6Li (KED)  | 67.572 %              | 1,790 cps         |               |
| 9Be (KED)  | 0.026 ppb             | 3 cps             |               |
| 11B (KED)  | 1.093 ppb             | 257 cps           |               |
| 24Mg (KED) | 480.875 ppb           | 158,831 cps       |               |
| 27Al (KED) | 525.233 ppb           | 46,497 cps        |               |

# Comprehensive

10/20/2021 6:11:31 PM

| Category    | Concentration average | Intensity average | Intensity RSD |
|-------------|-----------------------|-------------------|---------------|
| 45Sc (KED)  | 75.172 %              | 29,702 cps        |               |
| 51V (KED)   | 1.035 ppb             | 5,421 cps         |               |
| 52Cr (KED)  | 1.318 ppb             | 10,901 cps        |               |
| 55Mn (KED)  | 12.751 ppb            | 54,100 cps        |               |
| 56Fe (KED)  | 609.078 ppb           | 4,661,932 cps     |               |
| 58Ni (KED)  | 2.265 ppb             | 23,091 cps        |               |
| 59Co (KED)  | 0.238 ppb             | 3,964 cps         |               |
| 63Cu (KED)  | 3.867 ppb             | 47,119 cps        |               |
| 64Zn (KED)  | 71.531 ppb            | 264,418 cps       |               |
| 69Ga (KED)  | 1.850 ppb             | 7,412 cps         |               |
| 75As (KED)  | 0.241 ppb             | 253 cps           |               |
| 80Se (KED)  | 2.591 ppb             | 1,560 cps         |               |
| 85Rb (KED)  | 1.467 ppb             | 5,348 cps         |               |
| 88Sr (KED)  | 7.708 ppb             | 39,536 cps        |               |
| 89Y (KED)   | 70.763 %              | 259,952 cps       |               |
| 107Ag (KED) | 0.018 ppb             | 557 cps           |               |
| 114Cd (KED) | 0.018 ppb             | 240 cps           |               |
| 115In (KED) | 64.551 %              | 449,029 cps       |               |
| 133Cs (KED) | 0.068 ppb             | 1,143 cps         |               |
| 138Ba (KED) | 7.361 ppb             | 156,296 cps       |               |
| 139La (KED) | 0.578 ppb             | 26,582 cps        |               |
| 140Ce (KED) | 1.206 ppb             | 74,076 cps        |               |
| 141Pr (KED) | 0.145 ppb             | 9,427 cps         |               |
| 142Nd (KED) | 0.763 ppb             | 19,779 cps        |               |
| 152Sm (KED) | 0.105 ppb             | 2,440 cps         |               |
| 153Eu (KED) | 0.022 ppb             | 1,013 cps         |               |
| 158Gd (KED) | 0.081 ppb             | 2,554 cps         |               |
| 159Tb (KED) | 60.609 %              | 2,159,980 cps     |               |
| 164Dy (KED) | 0.062 ppb             | 2,187 cps         |               |
| 166Er (KED) | 0.028 ppb             | 1,417 cps         |               |
| 169Tm (KED) | 0.004 ppb             | 620 cps           |               |
| 174Yb (KED) | 0.021 ppb             | 1,053 cps         |               |
| 175Lu (KED) | -0.103 ppb            | 8,776 cps         |               |
| 205Tl (KED) | 0.007 ppb             | 607 cps           |               |
| 208Pb (KED) | 0.615 ppb             | 41,462 cps        |               |
| 209Bi (KED) | 53.486 %              | 1,705,000 cps     |               |
| 232Th (KED) | 0.145 ppb             | 17,706 cps        |               |
| 238U (KED)  | 0.033 ppb             | 4,834 cps         |               |

# Comprehensive

10/20/2021 6:11:31 PM

## Sample Summary

Instrument ID: iCAP Q

Analysis index: 49

Analysis name: 03038ti

Analysis started at: 10/20/2021 6:07:33 PM

User name: WINDOWS-UPCI4ER\Administrator

| Category    | Concentration average | Concentration RSD |
|-------------|-----------------------|-------------------|
| 6Li (KED)   | 68.579 %              |                   |
| 9Be (KED)   | 0.026 ppb             |                   |
| 11B (KED)   | 1.328 ppb             |                   |
| 24Mg (KED)  | 373.494 ppb           |                   |
| 27Al (KED)  | 334.208 ppb           |                   |
| 45Sc (KED)  | 76.635 %              |                   |
| 51V (KED)   | 0.652 ppb             |                   |
| 52Cr (KED)  | 1.180 ppb             |                   |
| 55Mn (KED)  | 7.927 ppb             |                   |
| 56Fe (KED)  | 364.196 ppb           |                   |
| 58Ni (KED)  | 1.889 ppb             |                   |
| 59Co (KED)  | 0.177 ppb             |                   |
| 63Cu (KED)  | 4.970 ppb             |                   |
| 64Zn (KED)  | 78.613 ppb            |                   |
| 69Ga (KED)  | 1.396 ppb             |                   |
| 75As (KED)  | 0.247 ppb             |                   |
| 80Se (KED)  | 2.576 ppb             |                   |
| 85Rb (KED)  | 1.861 ppb             |                   |
| 88Sr (KED)  | 5.560 ppb             |                   |
| 89Y (KED)   | 73.577 %              |                   |
| 107Ag (KED) | 0.022 ppb             |                   |
| 114Cd (KED) | 0.012 ppb             |                   |
| 115In (KED) | 67.344 %              |                   |
| 133Cs (KED) | 0.042 ppb             |                   |
| 138Ba (KED) | 5.536 ppb             |                   |
| 139La (KED) | 0.409 ppb             |                   |
| 140Ce (KED) | 0.899 ppb             |                   |
| 141Pr (KED) | 0.105 ppb             |                   |
| 142Nd (KED) | 0.547 ppb             |                   |
| 152Sm (KED) | 0.067 ppb             |                   |
| 153Eu (KED) | 0.012 ppb             |                   |
| 158Gd (KED) | 0.050 ppb             |                   |
| 159Tb (KED) | 62.829 %              |                   |
| 164Dy (KED) | 0.040 ppb             |                   |
| 166Er (KED) | 0.015 ppb             |                   |
| 169Tm (KED) | 0.003 ppb             |                   |
| 174Yb (KED) | 0.013 ppb             |                   |
| 175Lu (KED) | -0.106 ppb            |                   |
| 205Tl (KED) | 0.005 ppb             |                   |
| 208Pb (KED) | 0.614 ppb             |                   |
| 209Bi (KED) | 56.451 %              |                   |
| 232Th (KED) | 0.088 ppb             |                   |
| 238U (KED)  | 0.020 ppb             |                   |

| Category   | Concentration average | Intensity average | Intensity RSD |
|------------|-----------------------|-------------------|---------------|
| 6Li (KED)  | 68.579 %              | 1,817 cps         |               |
| 9Be (KED)  | 0.026 ppb             | 3 cps             |               |
| 11B (KED)  | 1.328 ppb             | 273 cps           |               |
| 24Mg (KED) | 373.494 ppb           | 125,215 cps       |               |
| 27Al (KED) | 334.208 ppb           | 30,183 cps        |               |

# Comprehensive

10/20/2021 6:11:31 PM

| Category    | Concentration average | Intensity average | Intensity RSD |
|-------------|-----------------------|-------------------|---------------|
| 45Sc (KED)  | 76.635 %              | 30,280 cps        |               |
| 51V (KED)   | 0.652 ppb             | 3,484 cps         |               |
| 52Cr (KED)  | 1.180 ppb             | 9,954 cps         |               |
| 55Mn (KED)  | 7.927 ppb             | 34,297 cps        |               |
| 56Fe (KED)  | 364.196 ppb           | 2,842,344 cps     |               |
| 58Ni (KED)  | 1.889 ppb             | 19,679 cps        |               |
| 59Co (KED)  | 0.177 ppb             | 3,007 cps         |               |
| 63Cu (KED)  | 4.970 ppb             | 62,818 cps        |               |
| 64Zn (KED)  | 78.613 ppb            | 302,090 cps       |               |
| 69Ga (KED)  | 1.396 ppb             | 5,828 cps         |               |
| 75As (KED)  | 0.247 ppb             | 270 cps           |               |
| 80Se (KED)  | 2.576 ppb             | 1,617 cps         |               |
| 85Rb (KED)  | 1.861 ppb             | 7,052 cps         |               |
| 88Sr (KED)  | 5.560 ppb             | 29,689 cps        |               |
| 89Y (KED)   | 73.577 %              | 270,288 cps       |               |
| 107Ag (KED) | 0.022 ppb             | 710 cps           |               |
| 114Cd (KED) | 0.012 ppb             | 183 cps           |               |
| 115In (KED) | 67.344 %              | 468,455 cps       |               |
| 133Cs (KED) | 0.042 ppb             | 753 cps           |               |
| 138Ba (KED) | 5.536 ppb             | 122,067 cps       |               |
| 139La (KED) | 0.409 ppb             | 19,515 cps        |               |
| 140Ce (KED) | 0.899 ppb             | 57,248 cps        |               |
| 141Pr (KED) | 0.105 ppb             | 7,055 cps         |               |
| 142Nd (KED) | 0.547 ppb             | 14,695 cps        |               |
| 152Sm (KED) | 0.067 ppb             | 1,613 cps         |               |
| 153Eu (KED) | 0.012 ppb             | 573 cps           |               |
| 158Gd (KED) | 0.050 ppb             | 1,623 cps         |               |
| 159Tb (KED) | 62.829 %              | 2,239,123 cps     |               |
| 164Dy (KED) | 0.040 ppb             | 1,477 cps         |               |
| 166Er (KED) | 0.015 ppb             | 917 cps           |               |
| 169Tm (KED) | 0.003 ppb             | 390 cps           |               |
| 174Yb (KED) | 0.013 ppb             | 677 cps           |               |
| 175Lu (KED) | -0.106 ppb            | 8,846 cps         |               |
| 205Tl (KED) | 0.005 ppb             | 483 cps           |               |
| 208Pb (KED) | 0.614 ppb             | 43,646 cps        |               |
| 209Bi (KED) | 56.451 %              | 1,799,519 cps     |               |
| 232Th (KED) | 0.088 ppb             | 11,328 cps        |               |
| 238U (KED)  | 0.020 ppb             | 3,154 cps         |               |

# Comprehensive

10/20/2021 6:11:31 PM

## Sample Summary

Instrument ID: iCAP Q

Analysis index: 50

Analysis name: 03037ti

Analysis started at: 10/20/2021 6:09:22 PM

User name: WINDOWS-UPCI4ER\Administrator

| Category    | Concentration average | Concentration RSD |
|-------------|-----------------------|-------------------|
| 6Li (KED)   | 66.314 %              |                   |
| 9Be (KED)   | -0.007 ppb            |                   |
| 11B (KED)   | 3.203 ppb             |                   |
| 24Mg (KED)  | 533.020 ppb           |                   |
| 27Al (KED)  | 544.434 ppb           |                   |
| 45Sc (KED)  | 75.781 %              |                   |
| 51V (KED)   | 1.047 ppb             |                   |
| 52Cr (KED)  | 1.369 ppb             |                   |
| 55Mn (KED)  | 12.250 ppb            |                   |
| 56Fe (KED)  | 631.825 ppb           |                   |
| 58Ni (KED)  | 3.166 ppb             |                   |
| 59Co (KED)  | 0.241 ppb             |                   |
| 63Cu (KED)  | 5.795 ppb             |                   |
| 64Zn (KED)  | 74.789 ppb            |                   |
| 69Ga (KED)  | 2.407 ppb             |                   |
| 75As (KED)  | 0.212 ppb             |                   |
| 80Se (KED)  | 2.648 ppb             |                   |
| 85Rb (KED)  | 2.301 ppb             |                   |
| 88Sr (KED)  | 7.981 ppb             |                   |
| 89Y (KED)   | 69.289 %              |                   |
| 107Ag (KED) | 0.106 ppb             |                   |
| 114Cd (KED) | 0.011 ppb             |                   |
| 115In (KED) | 64.451 %              |                   |
| 133Cs (KED) | 0.065 ppb             |                   |
| 138Ba (KED) | 9.061 ppb             |                   |
| 139La (KED) | 0.762 ppb             |                   |
| 140Ce (KED) | 1.530 ppb             |                   |
| 141Pr (KED) | 0.183 ppb             |                   |
| 142Nd (KED) | 0.966 ppb             |                   |
| 152Sm (KED) | 0.118 ppb             |                   |
| 153Eu (KED) | 0.019 ppb             |                   |
| 158Gd (KED) | 0.091 ppb             |                   |
| 159Tb (KED) | 62.163 %              |                   |
| 164Dy (KED) | 0.061 ppb             |                   |
| 166Er (KED) | 0.029 ppb             |                   |
| 169Tm (KED) | 0.004 ppb             |                   |
| 174Yb (KED) | 0.021 ppb             |                   |
| 175Lu (KED) | -0.103 ppb            |                   |
| 205Tl (KED) | 0.006 ppb             |                   |
| 208Pb (KED) | 0.633 ppb             |                   |
| 209Bi (KED) | 54.404 %              |                   |
| 232Th (KED) | 0.145 ppb             |                   |
| 238U (KED)  | 0.033 ppb             |                   |

| Category   | Concentration average | Intensity average | Intensity RSD |
|------------|-----------------------|-------------------|---------------|
| 6Li (KED)  | 66.314 %              | 1,757 cps         |               |
| 9Be (KED)  | -0.007 ppb            | 0 cps             |               |
| 11B (KED)  | 3.203 ppb             | 363 cps           |               |
| 24Mg (KED) | 533.020 ppb           | 172,770 cps       |               |
| 27Al (KED) | 544.434 ppb           | 48,584 cps        |               |

# Comprehensive

10/20/2021 6:11:31 PM

| Category    | Concentration average | Intensity average | Intensity RSD |
|-------------|-----------------------|-------------------|---------------|
| 45Sc (KED)  | 75.781 %              | 29,943 cps        |               |
| 51V (KED)   | 1.047 ppb             | 5,531 cps         |               |
| 52Cr (KED)  | 1.369 ppb             | 11,412 cps        |               |
| 55Mn (KED)  | 12.250 ppb            | 52,397 cps        |               |
| 56Fe (KED)  | 631.825 ppb           | 4,875,156 cps     |               |
| 58Ni (KED)  | 3.166 ppb             | 32,459 cps        |               |
| 59Co (KED)  | 0.241 ppb             | 4,041 cps         |               |
| 63Cu (KED)  | 5.795 ppb             | 68,899 cps        |               |
| 64Zn (KED)  | 74.789 ppb            | 270,676 cps       |               |
| 69Ga (KED)  | 2.407 ppb             | 9,430 cps         |               |
| 75As (KED)  | 0.212 ppb             | 220 cps           |               |
| 80Se (KED)  | 2.648 ppb             | 1,547 cps         |               |
| 85Rb (KED)  | 2.301 ppb             | 8,209 cps         |               |
| 88Sr (KED)  | 7.981 ppb             | 40,081 cps        |               |
| 89Y (KED)   | 69.289 %              | 254,536 cps       |               |
| 107Ag (KED) | 0.106 ppb             | 3,257 cps         |               |
| 114Cd (KED) | 0.011 ppb             | 163 cps           |               |
| 115In (KED) | 64.451 %              | 448,329 cps       |               |
| 133Cs (KED) | 0.065 ppb             | 1,100 cps         |               |
| 138Ba (KED) | 9.061 ppb             | 197,130 cps       |               |
| 139La (KED) | 0.762 ppb             | 35,905 cps        |               |
| 140Ce (KED) | 1.530 ppb             | 96,337 cps        |               |
| 141Pr (KED) | 0.183 ppb             | 12,186 cps        |               |
| 142Nd (KED) | 0.966 ppb             | 25,663 cps        |               |
| 152Sm (KED) | 0.118 ppb             | 2,810 cps         |               |
| 153Eu (KED) | 0.019 ppb             | 933 cps           |               |
| 158Gd (KED) | 0.091 ppb             | 2,924 cps         |               |
| 159Tb (KED) | 62.163 %              | 2,215,378 cps     |               |
| 164Dy (KED) | 0.061 ppb             | 2,200 cps         |               |
| 166Er (KED) | 0.029 ppb             | 1,500 cps         |               |
| 169Tm (KED) | 0.004 ppb             | 593 cps           |               |
| 174Yb (KED) | 0.021 ppb             | 1,110 cps         |               |
| 175Lu (KED) | -0.103 ppb            | 8,970 cps         |               |
| 205Tl (KED) | 0.006 ppb             | 577 cps           |               |
| 208Pb (KED) | 0.633 ppb             | 43,292 cps        |               |
| 209Bi (KED) | 54.404 %              | 1,734,262 cps     |               |
| 232Th (KED) | 0.145 ppb             | 17,953 cps        |               |
| 238U (KED)  | 0.033 ppb             | 4,834 cps         |               |
