# Supplementary material for: Geographic and breed-specific traceability of cashmere via mineral element profiling in Inner Mongolia (Ordos, Chifeng, and Alxa League)
Source: Royal Society of Chemistry journal article supplement (doi:10.1039/d5ra08122j), 2026-01-01
Supplement: d5ra08122j1.zip [file 20211028-min gai (1-5)+e tuo ke (6-22) + e tuo ke (1-22).pdf › ԭʼ޿/20211028-min gai (1-5)+e tuo ke (6-22) + e tuo ke (1-22).pdf]

## Instrument Summary:

Instrument ID: iCAP Q  
Serial Number: Undefined

## Labbook Summary:

Path and filename: \_Application Data\Workspace\LabBooks\wlw\20211028-1.imexp  
Labbook created by: Administrator  
Based on template:  
Hardware configuration: iCAPQ1  
Labbook type: eQuant  
Qtegra version (last saved): 2.7.2425.154  
Labbook started: 10/28/2021 2:54:57 PM  
Labbook finished: 10/28/2021 5:08:56 PM

## Method Summary:

| Isotope     | Mode | Dwell time (s) | # of Channels | Spacing | Resolution | IS          |
|-------------|------|----------------|---------------|---------|------------|-------------|
| 6Li (KED)   | KED  | 0.03           | 3             | 0.1     | Normal     |             |
| 9Be (KED)   | KED  | 0.03           | 3             | 0.1     | Normal     | 6Li (KED)   |
| 11B (KED)   | KED  | 0.03           | 3             | 0.1     | Normal     | 6Li (KED)   |
| 24Mg (KED)  | KED  | 0.03           | 3             | 0.1     | Normal     | 6Li (KED)   |
| 27Al (KED)  | KED  | 0.03           | 3             | 0.1     | Normal     | 45Sc (KED)  |
| 45Sc (KED)  | KED  | 0.03           | 3             | 0.1     | Normal     |             |
| 51V (KED)   | KED  | 0.03           | 3             | 0.1     | Normal     | 45Sc (KED)  |
| 52Cr (KED)  | KED  | 0.03           | 3             | 0.1     | Normal     | 45Sc (KED)  |
| 55Mn (KED)  | KED  | 0.03           | 3             | 0.1     | Normal     | 45Sc (KED)  |
| 56Fe (KED)  | KED  | 0.03           | 3             | 0.1     | Normal     | 45Sc (KED)  |
| 58Ni (KED)  | KED  | 0.03           | 3             | 0.1     | Normal     | 45Sc (KED)  |
| 59Co (KED)  | KED  | 0.03           | 3             | 0.1     | Normal     | 45Sc (KED)  |
| 63Cu (KED)  | KED  | 0.03           | 3             | 0.1     | Normal     | 89Y (KED)   |
| 64Zn (KED)  | KED  | 0.03           | 3             | 0.1     | Normal     | 89Y (KED)   |
| 69Ga (KED)  | KED  | 0.03           | 3             | 0.1     | Normal     | 89Y (KED)   |
| 75As (KED)  | KED  | 0.03           | 3             | 0.1     | Normal     | 89Y (KED)   |
| 80Se (KED)  | KED  | 0.03           | 3             | 0.1     | Normal     | 89Y (KED)   |
| 85Rb (KED)  | KED  | 0.03           | 3             | 0.1     | Normal     | 89Y (KED)   |
| 88Sr (KED)  | KED  | 0.03           | 3             | 0.1     | Normal     | 89Y (KED)   |
| 89Y (KED)   | KED  | 0.03           | 3             | 0.1     | Normal     |             |
| 107Ag (KED) | KED  | 0.03           | 3             | 0.1     | Normal     | 115In (KED) |
| 114Cd (KED) | KED  | 0.03           | 3             | 0.1     | Normal     | 115In (KED) |
| 115In (KED) | KED  | 0.03           | 3             | 0.1     | Normal     |             |
| 133Cs (KED) | KED  | 0.03           | 3             | 0.1     | Normal     | 115In (KED) |
| 138Ba (KED) | KED  | 0.03           | 3             | 0.1     | Normal     | 159Tb (KED) |
| 139La (KED) | KED  | 0.03           | 3             | 0.1     | Normal     | 159Tb (KED) |
| 140Ce (KED) | KED  | 0.03           | 3             | 0.1     | Normal     | 159Tb (KED) |
| 141Pr (KED) | KED  | 0.03           | 3             | 0.1     | Normal     | 159Tb (KED) |
| 142Nd (KED) | KED  | 0.03           | 3             | 0.1     | Normal     | 159Tb (KED) |
| 152Sm (KED) | KED  | 0.03           | 3             | 0.1     | Normal     | 159Tb (KED) |
| 153Eu (KED) | KED  | 0.03           | 3             | 0.1     | Normal     | 159Tb (KED) |
| 158Gd (KED) | KED  | 0.03           | 3             | 0.1     | Normal     | 159Tb (KED) |
| 159Tb (KED) | KED  | 0.03           | 3             | 0.1     | Normal     |             |
| 164Dy (KED) | KED  | 0.03           | 3             | 0.1     | Normal     | 159Tb (KED) |
| 166Er (KED) | KED  | 0.03           | 3             | 0.1     | Normal     | 159Tb (KED) |
| 169Tm (KED) | KED  | 0.03           | 3             | 0.1     | Normal     | 159Tb (KED) |
| 174Yb (KED) | KED  | 0.03           | 3             | 0.1     | Normal     | 159Tb (KED) |
| 175Lu (KED) | KED  | 0.03           | 3             | 0.1     | Normal     | 159Tb (KED) |
| 205Tl (KED) | KED  | 0.03           | 3             | 0.1     | Normal     | 209Bi (KED) |
| 208Pb (KED) | KED  | 0.03           | 3             | 0.1     | Normal     | 209Bi (KED) |
| 209Bi (KED) | KED  | 0.03           | 3             | 0.1     | Normal     |             |
| 232Th (KED) | KED  | 0.03           | 3             | 0.1     | Normal     | 209Bi (KED) |
| 238U (KED)  | KED  | 0.03           | 3             | 0.1     | Normal     | 209Bi (KED) |

| Isotope     | Mode | Dwell time (s) | # of Channels | Spacing | Resolution |
|-------------|------|----------------|---------------|---------|------------|
| 6Li (KED)   | KED  | 0.03           | 3             | 0.1     | Normal     |
| 45Sc (KED)  | KED  | 0.03           | 3             | 0.1     | Normal     |
| 89Y (KED)   | KED  | 0.03           | 3             | 0.1     | Normal     |
| 115In (KED) | KED  | 0.03           | 3             | 0.1     | Normal     |
| 159Tb (KED) | KED  | 0.03           | 3             | 0.1     | Normal     |
| 209Bi (KED) | KED  | 0.03           | 3             | 0.1     | Normal     |

| No. of sweeps | Time per sweep[s] | Time per main run[s] |
|---------------|-------------------|----------------------|
| 10            | 3.87              | 38.7                 |

## Calibration Curves:

9Be (KED)

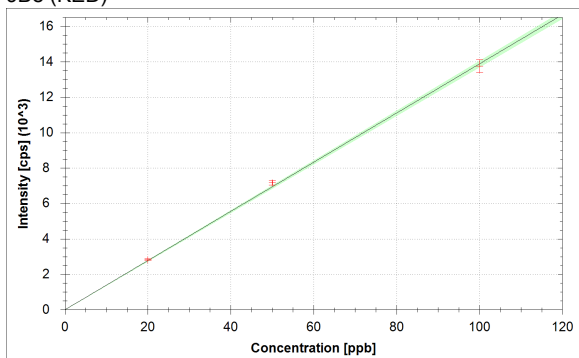

$$f(x) = 138.7658 \cdot x$$

$$R^2 = 0.9995$$

$$\text{BEC} = 0.000 \text{ ppb}$$

$$\text{LoD} = 0.0000 \text{ ppb}$$

11B (KED)

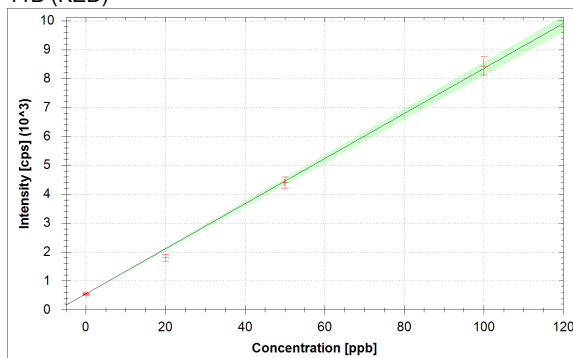

$$f(x) = 77.9635 \cdot x + 548.1623$$

$$R^2 = 0.9976$$

$$\text{BEC} = 7.031 \text{ ppb}$$

$$\text{LoD} = 2.1204 \text{ ppb}$$

24Mg (KED)

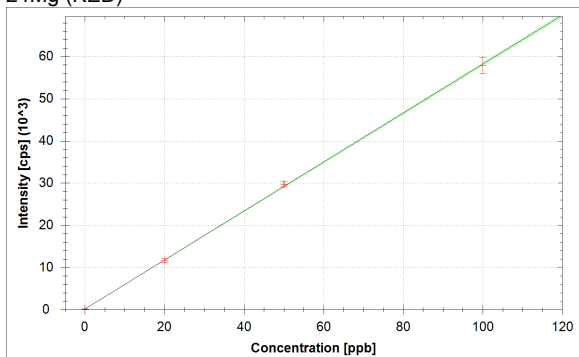

$$f(x) = 580.5157 \cdot x + 136.9403$$

$$R^2 = 0.9998$$

$$\text{BEC} = 0.236 \text{ ppb}$$

$$\text{LoD} = 0.0119 \text{ ppb}$$

27Al (KED)

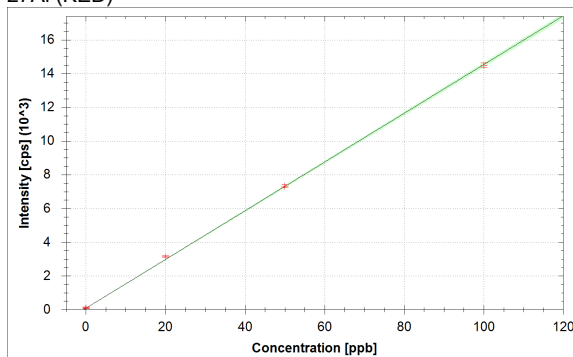

$$f(x) = 144.5551 \cdot x + 78.5127$$

$$R^2 = 0.9998$$

$$\text{BEC} = 0.543 \text{ ppb}$$

$$\text{LoD} = 0.8979 \text{ ppb}$$

51V (KED)

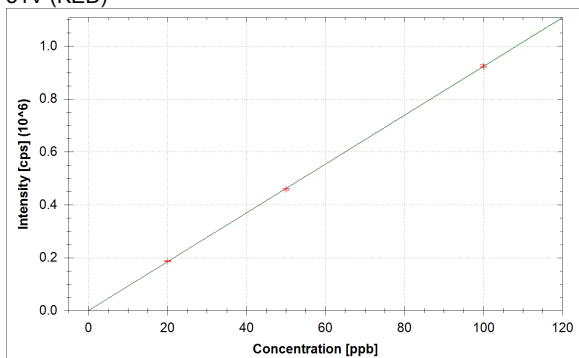

$$f(x) = 9230.0266 \cdot x + 2.2192$$

$$R^2 = 1.0000$$

$$\text{BEC} = 0.000 \text{ ppb}$$

$$\text{LoD} = 0.0012 \text{ ppb}$$

52Cr (KED)

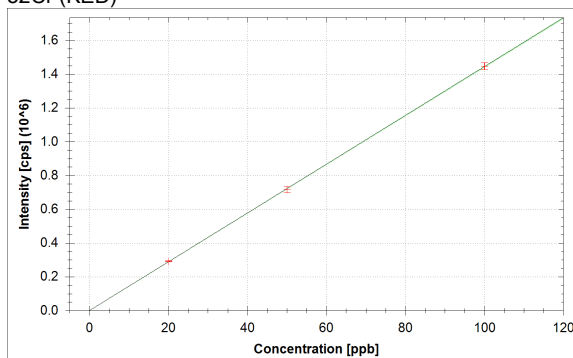

$$f(x) = 14439.9854 \cdot x + 45.4050$$

$$R^2 = 1.0000$$

$$\text{BEC} = 0.003 \text{ ppb}$$

$$\text{LoD} = 0.0035 \text{ ppb}$$

55Mn (KED)

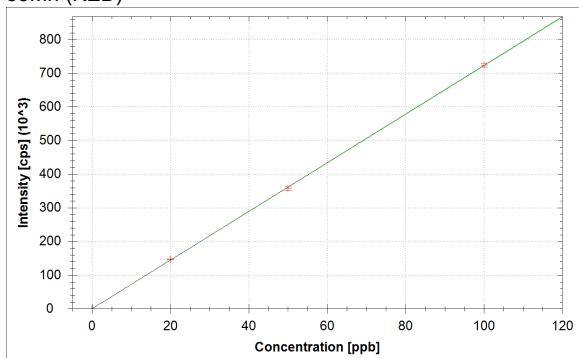

$$f(x) = 7227.8932 \cdot x + 46.4688$$

$$R^2 = 1.0000$$

$$\text{BEC} = 0.006 \text{ ppb}$$

$$\text{LoD} = 0.0044 \text{ ppb}$$

56Fe (KED)

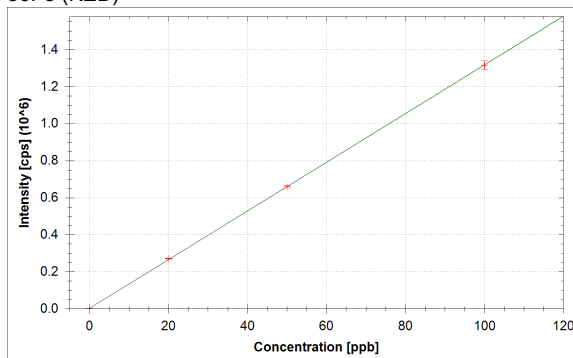

$$f(x) = 13149.8274 \cdot x + 2026.8617$$

$$R^2 = 1.0000$$

$$\text{BEC} = 0.154 \text{ ppb}$$

$$\text{LoD} = 0.0283 \text{ ppb}$$

58Ni (KED)

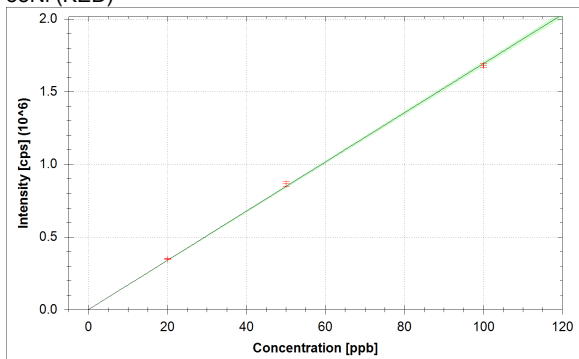

$$f(x) = 16918.8704 \cdot x + 276.5888$$

$$R^2 = 0.9997$$

$$\text{BEC} = 0.016 \text{ ppb}$$

$$\text{LoD} = 0.0085 \text{ ppb}$$

59Co (KED)

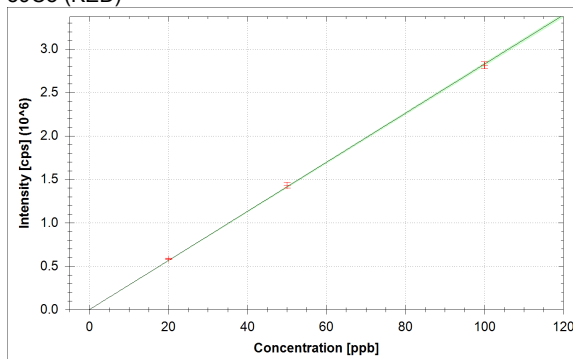

$$f(x) = 28263.3056 \cdot x + 16.5992$$

$$R^2 = 0.9999$$

$$\text{BEC} = 0.001 \text{ ppb}$$

$$\text{LoD} = 0.0008 \text{ ppb}$$

63Cu (KED)

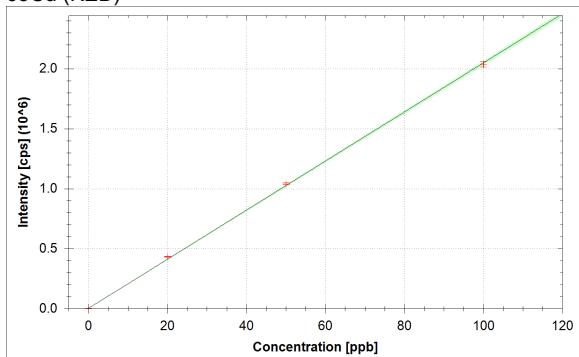

$$f(x) = 20461.2394 \cdot x + 2018.1887$$

$$R^2 = 0.9998$$

$$\text{BEC} = 0.099 \text{ ppb}$$

$$\text{LoD} = 0.0142 \text{ ppb}$$

64Zn (KED)

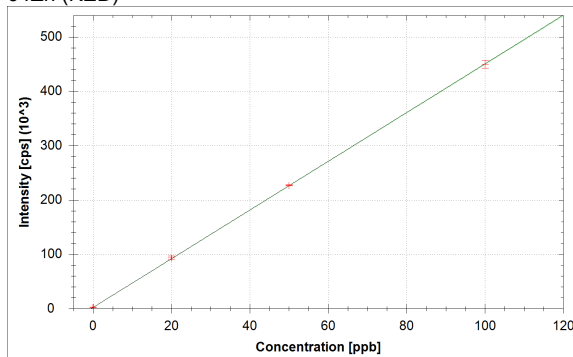

$$f(x) = 4481.9205 \cdot x + 2008.2846$$

$$R^2 = 1.0000$$

$$\text{BEC} = 0.448 \text{ ppb}$$

$$\text{LoD} = 0.1262 \text{ ppb}$$

69Ga (KED)

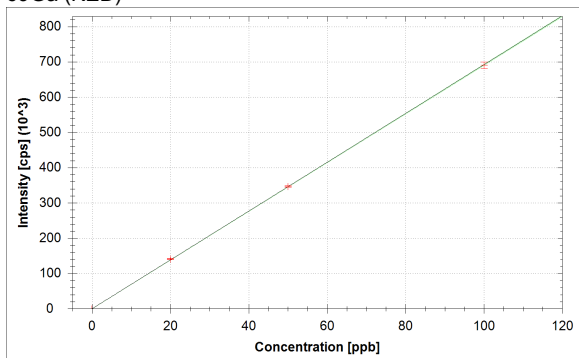

$$f(x) = 6918.8091 \cdot x + 35.3837$$

$$R^2 = 1.0000$$

$$\text{BEC} = 0.005 \text{ ppb}$$

$$\text{LoD} = 0.0039 \text{ ppb}$$

75As (KED)

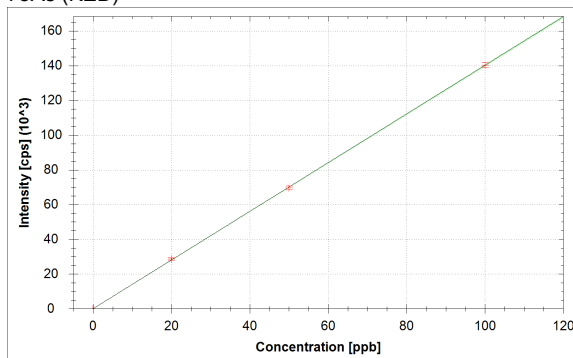

$$f(x) = 1401.8582 \cdot x + 11.0352$$

$$R^2 = 1.0000$$

$$\text{BEC} = 0.008 \text{ ppb}$$

$$\text{LoD} = 0.0174 \text{ ppb}$$

80Se (KED)

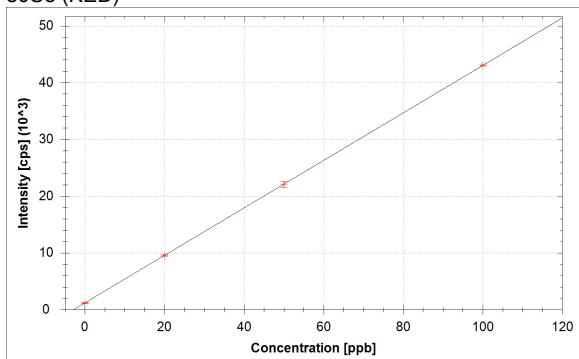

$$f(x) = 418.5489 \cdot x + 1173.5038$$

$$R^2 = 1.0000$$

$$\text{BEC} = 2.804 \text{ ppb}$$

$$\text{LoD} = 0.7521 \text{ ppb}$$

85Rb (KED)

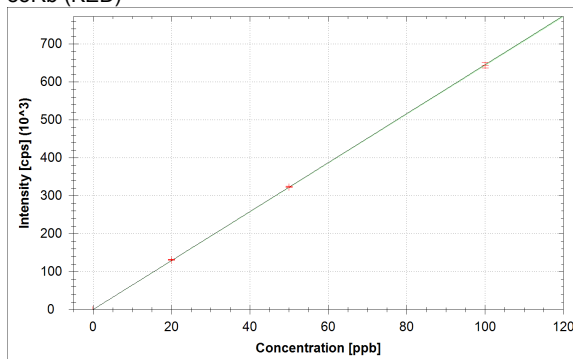

$$f(x) = 6449.6404 \cdot x + 13.2355$$

$$R^2 = 1.0000$$

$$\text{BEC} = 0.002 \text{ ppb}$$

$$\text{LoD} = 0.0040 \text{ ppb}$$

88Sr (KED)

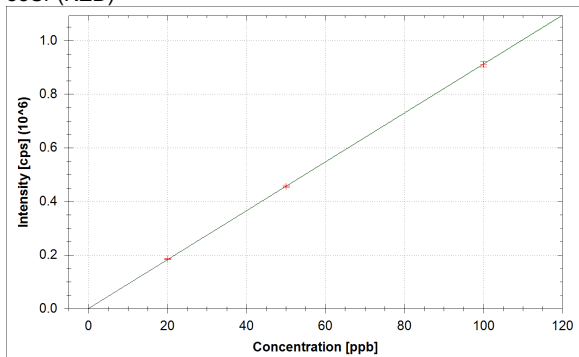

$$f(x) = 9118.8646 \cdot x + 82.8904$$

$$R^2 = 1.0000$$

$$\text{BEC} = 0.009 \text{ ppb}$$

$$\text{LoD} = 0.0073 \text{ ppb}$$

107Ag (KED)

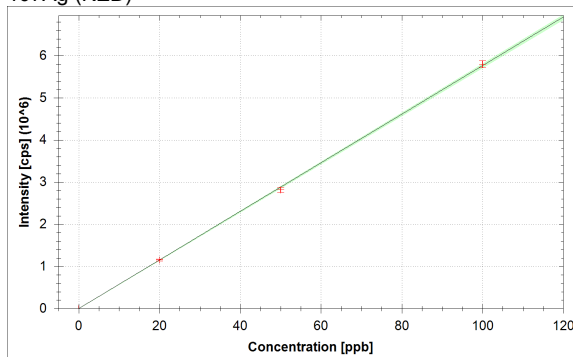

$$f(x) = 57643.4091 \cdot x + 27.2155$$

$$R^2 = 0.9998$$

$$\text{BEC} = 0.000 \text{ ppb}$$

$$\text{LoD} = 0.0009 \text{ ppb}$$

114Cd (KED)

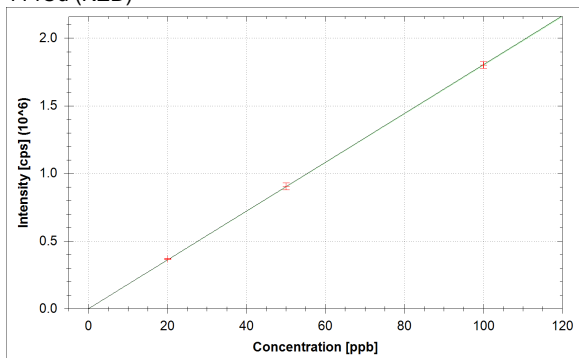

$$f(x) = 18032.3060 \cdot x + 17.4453$$

$$R^2 = 1.0000$$

$$\text{BEC} = 0.001 \text{ ppb}$$

$$\text{LoD} = 0.0011 \text{ ppb}$$

133Cs (KED)

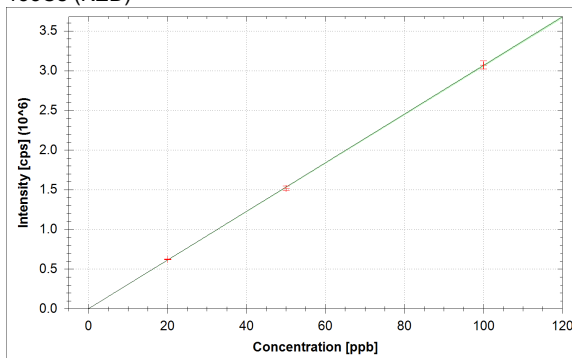

$$f(x) = 30639.2884 \cdot x + 16.3777$$

$$R^2 = 1.0000$$

$$\text{BEC} = 0.001 \text{ ppb}$$

$$\text{LoD} = 0.0003 \text{ ppb}$$

138Ba (KED)

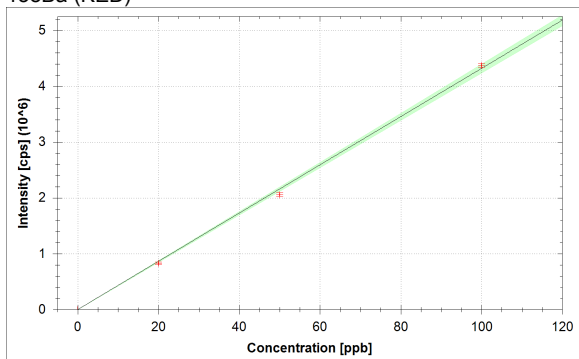

$$f(x) = 43189.5046 \cdot x + 643.0352$$

$$R^2 = 0.9990$$

$$\text{BEC} = 0.015 \text{ ppb}$$

$$\text{LoD} = 0.0034 \text{ ppb}$$

139La (KED)

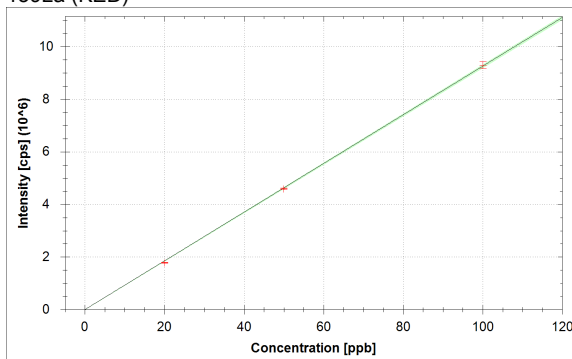

$$f(x) = 92594.2888 \cdot x + 11.1072$$

$$R^2 = 0.9999$$

$$\text{BEC} = 0.000 \text{ ppb}$$

$$\text{LoD} = 0.0001 \text{ ppb}$$

140Ce (KED)

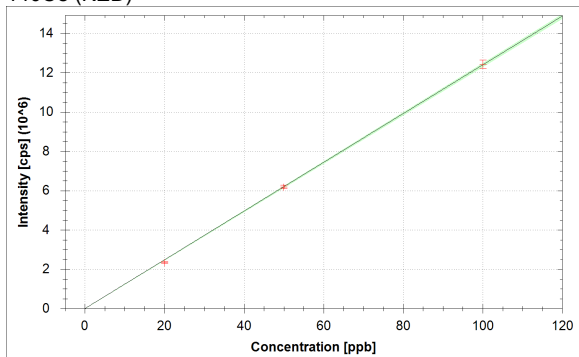

$$f(x) = 124018.0408 \cdot x + 96.3935$$

$$R^2 = 0.9998$$

$$\text{BEC} = 0.001 \text{ ppb}$$

$$\text{LoD} = 0.0001 \text{ ppb}$$

141Pr (KED)

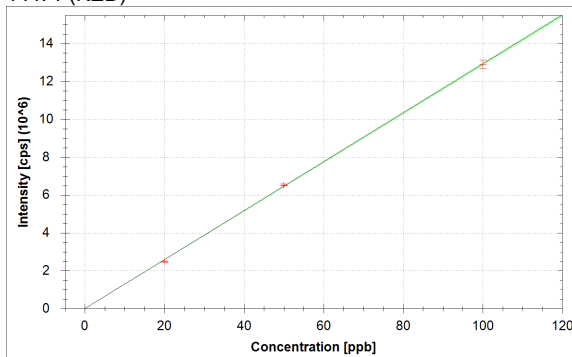

$$f(x) = 129214.1661 \cdot x + 6.6549$$

$$R^2 = 0.9998$$

$$\text{BEC} = 0.000 \text{ ppb}$$

$$\text{LoD} = 0.0002 \text{ ppb}$$

142Nd (KED)

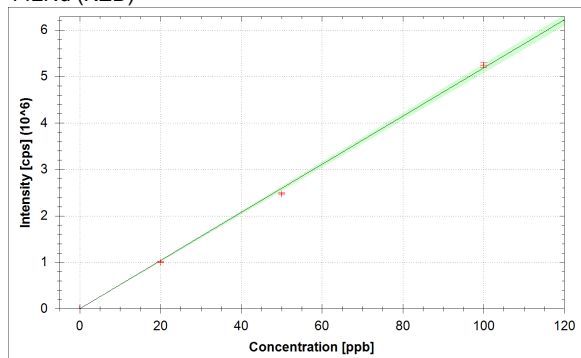

$$f(x) = 51812.3983 \cdot x + 19.5945$$

$$R^2 = 0.9991$$

$$\text{BEC} = 0.000 \text{ ppb}$$

$$\text{LoD} = 0.0002 \text{ ppb}$$

152Sm (KED)

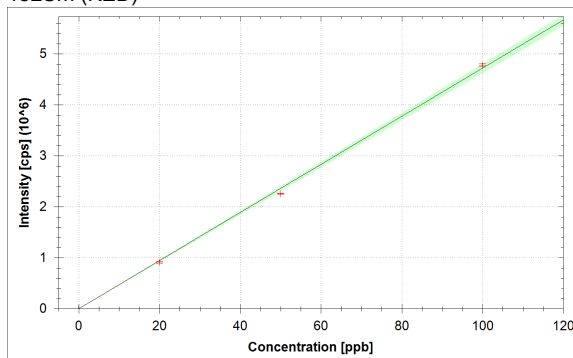

$$f(x) = 47185.1742 \cdot x + 3.2822$$

$$R^2 = 0.9990$$

$$\text{BEC} = 0.000 \text{ ppb}$$

$$\text{LoD} = 0.0002 \text{ ppb}$$

153Eu (KED)

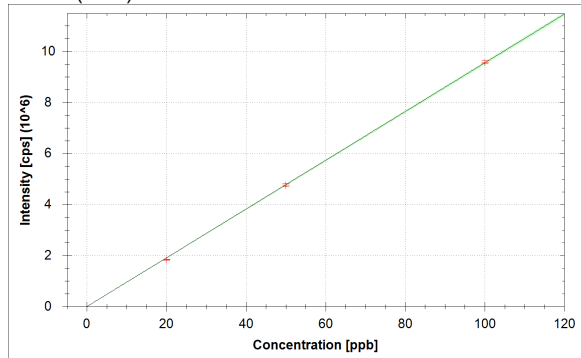

$$f(x) = 95497.5780 \cdot x + 6.8955$$

$$R^2 = 0.9999$$

$$\text{BEC} = 0.000 \text{ ppb}$$

$$\text{LoD} = 0.0001 \text{ ppb}$$

158Gd (KED)

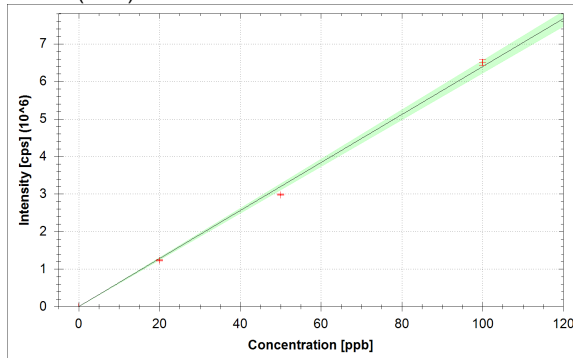

$$f(x) = 63927.6218 \cdot x + 5.5443$$

$$R^2 = 0.9979$$

$$\text{BEC} = 0.000 \text{ ppb}$$

$$\text{LoD} = 0.0002 \text{ ppb}$$

164Dy (KED)

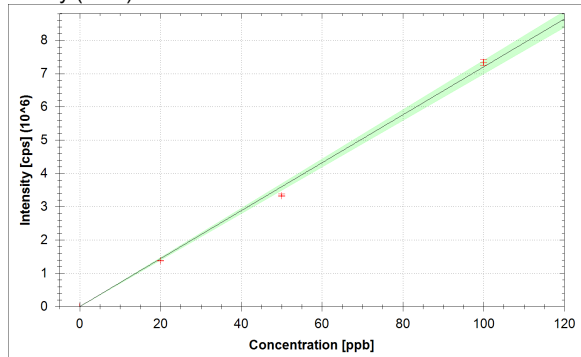

$$f(x) = 71973.6736 \cdot x + 9.0981$$

$$R^2 = 0.9976$$

$$\text{BEC} = 0.000 \text{ ppb}$$

$$\text{LoD} = 0.0003 \text{ ppb}$$

166Er (KED)

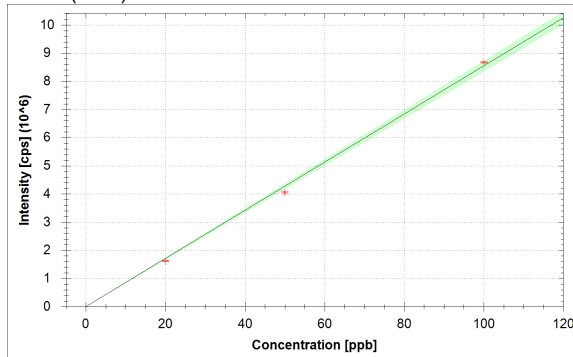

$$f(x) = 85463.8435 \cdot x + 447.8329$$

$$R^2 = 0.9986$$

$$\text{BEC} = 0.005 \text{ ppb}$$

$$\text{LoD} = 0.0029 \text{ ppb}$$

169Tm (KED)

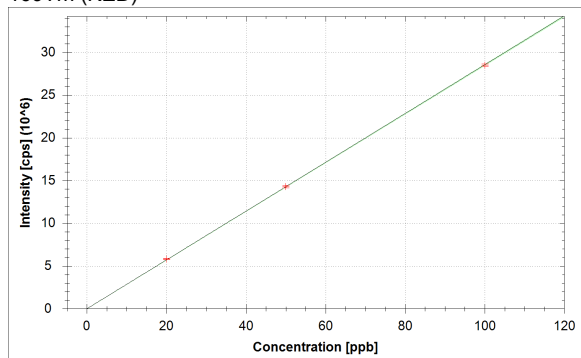

$$f(x) = 285456.7283 \cdot x + 9.0733$$

$$R^2 = 1.0000$$

$$\text{BEC} = 0.000 \text{ ppb}$$

$$\text{LoD} = 0.0001 \text{ ppb}$$

174Yb (KED)

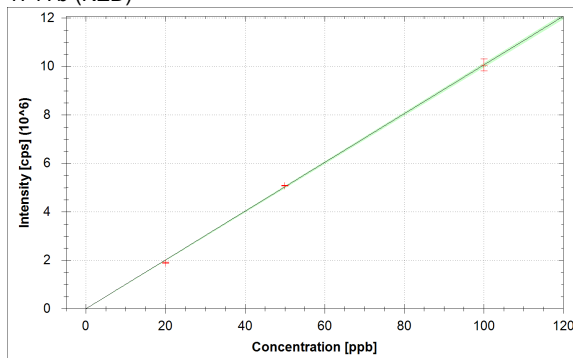

$$f(x) = 100575.7379 \cdot x + 15.9936$$

$$R^2 = 0.9998$$

$$\text{BEC} = 0.000 \text{ ppb}$$

$$\text{LoD} = 0.0001 \text{ ppb}$$

175Lu (KED)

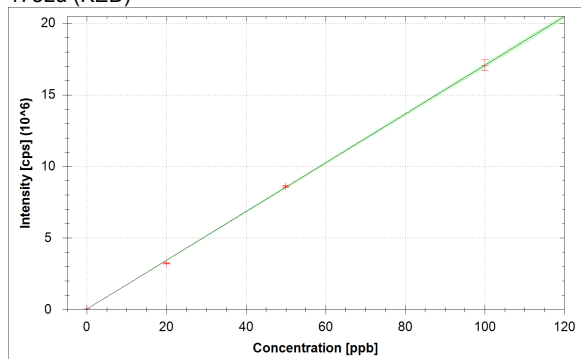

$$f(x) = 170209.9081 \cdot x + 35797.1245$$

$$R^2 = 0.9998$$

$$\text{BEC} = 0.210 \text{ ppb}$$

$$\text{LoD} = 0.0331 \text{ ppb}$$

205Tl (KED)

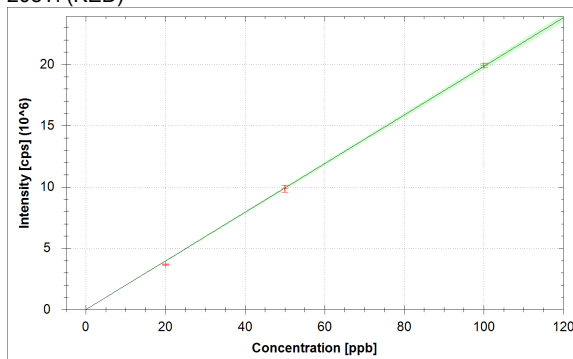

$$f(x) = 198320.7530 \cdot x + 47.2268$$

$$R^2 = 0.9996$$

$$\text{BEC} = 0.000 \text{ ppb}$$

$$\text{LoD} = 0.0001 \text{ ppb}$$

208Pb (KED)

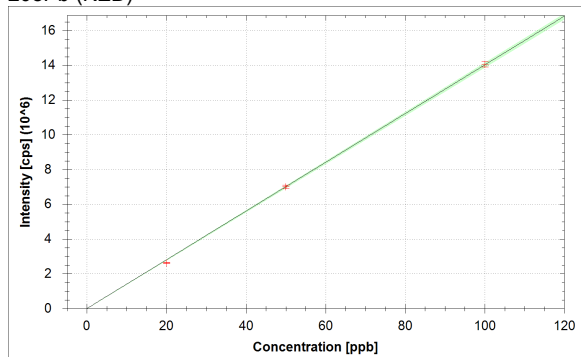

$$f(x) = 140161.4243 \cdot x + 4152.5927$$

$$R^2 = 0.9997$$

$$\text{BEC} = 0.030 \text{ ppb}$$

$$\text{LoD} = 0.0019 \text{ ppb}$$

232Th (KED)

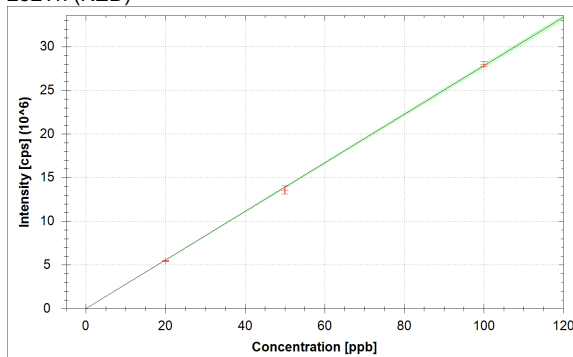

$$f(x) = 277953.2494 \cdot x + 88.8140$$

$$R^2 = 0.9997$$

$$\text{BEC} = 0.000 \text{ ppb}$$

$$\text{LoD} = 0.0001 \text{ ppb}$$

238U (KED)

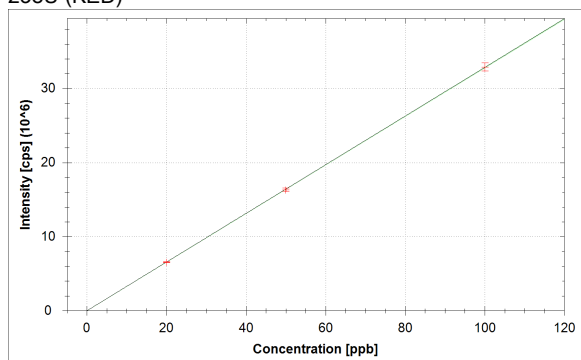

$$f(x) = 328413.5519 \cdot x + 67.4827$$

$$R^2 = 1.0000$$

$$\text{BEC} = 0.000 \text{ ppb}$$

$$\text{LoD} = 0.0007 \text{ ppb}$$

**Standards:**

Analysis Index: 3  
 Analysis Name: 0+20  
 Analysis Type: STD  
 Analysis Started at: 10/28/2021 3:01:12 PM  
 Standard (Stock): std0  
 Standard DF: 1

| Category    | Concentration average | Concentration RSD | Standard Concentration |
|-------------|-----------------------|-------------------|------------------------|
| 6Li (KED)   | 103.230 %             |                   |                        |
| 9Be (KED)   | 0.000 ppb             |                   | 0.000 ppb              |
| 11B (KED)   | 0.000 ppb             | 0.0 %             | 0.000 ppb              |
| 24Mg (KED)  | 0.000 ppb             | 0.2 %             | 0.000 ppb              |
| 27Al (KED)  | 0.000 ppb             | 0.1 %             | 0.000 ppb              |
| 45Sc (KED)  | 100.445 %             |                   |                        |
| 51V (KED)   | 0.000 ppb             | 1.7 %             | 0.000 ppb              |
| 52Cr (KED)  | 0.000 ppb             | 0.4 %             | 0.000 ppb              |
| 55Mn (KED)  | 0.000 ppb             | 0.1 %             | 0.000 ppb              |
| 56Fe (KED)  | 0.000 ppb             | 0.1 %             | 0.000 ppb              |
| 58Ni (KED)  | 0.000 ppb             | 0.1 %             | 0.000 ppb              |
| 59Co (KED)  | 0.000 ppb             | 0.5 %             | 0.000 ppb              |
| 63Cu (KED)  | 0.000 ppb             | 0.1 %             | 0.000 ppb              |
| 64Zn (KED)  | 0.000 ppb             | 0.1 %             | 0.000 ppb              |
| 69Ga (KED)  | 0.000 ppb             | 0.1 %             | 0.000 ppb              |
| 75As (KED)  | 0.000 ppb             | 0.3 %             | 0.000 ppb              |
| 80Se (KED)  | 0.000 ppb             | 0.0 %             | 0.000 ppb              |
| 85Rb (KED)  | 0.000 ppb             | 1.0 %             | 0.000 ppb              |
| 88Sr (KED)  | 0.000 ppb             | 0.1 %             | 0.000 ppb              |
| 89Y (KED)   | 100.551 %             |                   |                        |
| 107Ag (KED) | 0.000 ppb             | 0.2 %             | 0.000 ppb              |
| 114Cd (KED) | 0.000 ppb             | 0.2 %             | 0.000 ppb              |
| 115In (KED) | 102.065 %             |                   |                        |
| 133Cs (KED) | 0.000 ppb             | 0.7 %             | 0.000 ppb              |
| 138Ba (KED) | 0.000 ppb             | 0.1 %             | 0.000 ppb              |
| 139La (KED) | 0.000 ppb             | 0.4 %             | 0.000 ppb              |
| 140Ce (KED) | 0.000 ppb             | 0.1 %             | 0.000 ppb              |
| 141Pr (KED) | 0.000 ppb             | 0.5 %             | 0.000 ppb              |
| 142Nd (KED) | 0.000 ppb             | 1.0 %             | 0.000 ppb              |
| 152Sm (KED) | 0.000 ppb             | 1.0 %             | 0.000 ppb              |
| 153Eu (KED) | 0.000 ppb             | 0.9 %             | 0.000 ppb              |
| 158Gd (KED) | 0.000 ppb             | 1.2 %             | 0.000 ppb              |
| 159Tb (KED) | 99.128 %              |                   |                        |
| 164Dy (KED) | 0.000 ppb             | 0.9 %             | 0.000 ppb              |
| 166Er (KED) | 0.000 ppb             | 0.0 %             | 0.000 ppb              |
| 169Tm (KED) | 0.000 ppb             | 0.9 %             | 0.000 ppb              |
| 174Yb (KED) | 0.000 ppb             | 0.8 %             | 0.000 ppb              |
| 175Lu (KED) | 0.000 ppb             | 0.0 %             | 0.000 ppb              |
| 205Tl (KED) | 0.000 ppb             | 0.1 %             | 0.000 ppb              |
| 208Pb (KED) | 0.000 ppb             | 0.1 %             | 0.000 ppb              |
| 209Bi (KED) | 98.827 %              |                   |                        |
| 232Th (KED) | 0.000 ppb             | 0.2 %             | 0.000 ppb              |
| 238U (KED)  | 0.000 ppb             | 0.3 %             | 0.000 ppb              |

**Standards:**

Analysis Index: 4  
 Analysis Name: 20+20  
 Analysis Type: STD  
 Analysis Started at: 10/28/2021 3:04:15 PM  
 Standard (Stock): std3  
 Standard DF: 1

| Category    | Concentration average | Concentration RSD | Standard Concentration |
|-------------|-----------------------|-------------------|------------------------|
| 6Li (KED)   | 103.121 %             |                   |                        |
| 9Be (KED)   | 20.368 ppb            | 1.5 %             | 20.000 ppb             |
| 11B (KED)   | 15.974 ppb            | 9.4 %             | 20.000 ppb             |
| 24Mg (KED)  | 19.752 ppb            | 4.1 %             | 20.000 ppb             |
| 27Al (KED)  | 21.227 ppb            | 1.7 %             | 20.000 ppb             |
| 45Sc (KED)  | 104.753 %             |                   |                        |
| 51V (KED)   | 20.192 ppb            | 0.8 %             | 20.000 ppb             |
| 52Cr (KED)  | 20.181 ppb            | 1.1 %             | 20.000 ppb             |
| 55Mn (KED)  | 20.292 ppb            | 0.5 %             | 20.000 ppb             |
| 56Fe (KED)  | 20.400 ppb            | 0.7 %             | 20.000 ppb             |
| 58Ni (KED)  | 20.622 ppb            | 1.2 %             | 20.000 ppb             |
| 59Co (KED)  | 20.648 ppb            | 1.3 %             | 20.000 ppb             |
| 63Cu (KED)  | 20.929 ppb            | 1.4 %             | 20.000 ppb             |
| 64Zn (KED)  | 20.337 ppb            | 3.6 %             | 20.000 ppb             |
| 69Ga (KED)  | 20.375 ppb            | 1.2 %             | 20.000 ppb             |
| 75As (KED)  | 20.395 ppb            | 2.1 %             | 20.000 ppb             |
| 80Se (KED)  | 20.001 ppb            | 2.0 %             | 20.000 ppb             |
| 85Rb (KED)  | 20.336 ppb            | 1.3 %             | 20.000 ppb             |
| 88Sr (KED)  | 20.269 ppb            | 0.8 %             | 20.000 ppb             |
| 89Y (KED)   | 105.094 %             |                   |                        |
| 107Ag (KED) | 20.018 ppb            | 2.0 %             | 20.000 ppb             |
| 114Cd (KED) | 20.333 ppb            | 0.8 %             | 20.000 ppb             |
| 115In (KED) | 105.030 %             |                   |                        |
| 133Cs (KED) | 20.253 ppb            | 0.9 %             | 20.000 ppb             |
| 138Ba (KED) | 19.199 ppb            | 3.0 %             | 20.000 ppb             |
| 139La (KED) | 19.160 ppb            | 0.8 %             | 20.000 ppb             |
| 140Ce (KED) | 18.905 ppb            | 2.1 %             | 20.000 ppb             |
| 141Pr (KED) | 19.119 ppb            | 1.8 %             | 20.000 ppb             |
| 142Nd (KED) | 19.438 ppb            | 1.5 %             | 20.000 ppb             |
| 152Sm (KED) | 19.316 ppb            | 1.9 %             | 20.000 ppb             |
| 153Eu (KED) | 19.135 ppb            | 1.1 %             | 20.000 ppb             |
| 158Gd (KED) | 19.295 ppb            | 1.7 %             | 20.000 ppb             |
| 159Tb (KED) | 105.842 %             |                   |                        |
| 164Dy (KED) | 19.116 ppb            | 0.4 %             | 20.000 ppb             |
| 166Er (KED) | 18.972 ppb            | 0.8 %             | 20.000 ppb             |
| 169Tm (KED) | 20.440 ppb            | 0.9 %             | 20.000 ppb             |
| 174Yb (KED) | 18.865 ppb            | 1.4 %             | 20.000 ppb             |
| 175Lu (KED) | 18.733 ppb            | 1.6 %             | 20.000 ppb             |
| 205Tl (KED) | 18.444 ppb            | 1.8 %             | 20.000 ppb             |
| 208Pb (KED) | 18.622 ppb            | 1.4 %             | 20.000 ppb             |
| 209Bi (KED) | 103.877 %             |                   |                        |
| 232Th (KED) | 19.608 ppb            | 1.0 %             | 20.000 ppb             |
| 238U (KED)  | 20.014 ppb            | 0.9 %             | 20.000 ppb             |

**Standards:**

Analysis Index: 5  
 Analysis Name: 50+20  
 Analysis Type: STD  
 Analysis Started at: 10/28/2021 3:07:37 PM  
 Standard (Stock): std1  
 Standard DF: 1

| Category    | Concentration average | Concentration RSD | Standard Concentration |
|-------------|-----------------------|-------------------|------------------------|
| 6Li (KED)   | 98.439 %              |                   |                        |
| 9Be (KED)   | 51.613 ppb            | 1.9 %             | 50.000 ppb             |
| 11B (KED)   | 49.447 ppb            | 5.0 %             | 50.000 ppb             |
| 24Mg (KED)  | 51.022 ppb            | 2.2 %             | 50.000 ppb             |
| 27Al (KED)  | 50.068 ppb            | 1.3 %             | 50.000 ppb             |
| 45Sc (KED)  | 104.142 %             |                   |                        |
| 51V (KED)   | 49.738 ppb            | 0.8 %             | 50.000 ppb             |
| 52Cr (KED)  | 49.584 ppb            | 2.3 %             | 50.000 ppb             |
| 55Mn (KED)  | 49.525 ppb            | 1.6 %             | 50.000 ppb             |
| 56Fe (KED)  | 49.964 ppb            | 1.2 %             | 50.000 ppb             |
| 58Ni (KED)  | 51.057 ppb            | 2.1 %             | 50.000 ppb             |
| 59Co (KED)  | 50.610 ppb            | 2.1 %             | 50.000 ppb             |
| 63Cu (KED)  | 50.708 ppb            | 0.8 %             | 50.000 ppb             |
| 64Zn (KED)  | 50.140 ppb            | 0.5 %             | 50.000 ppb             |
| 69Ga (KED)  | 50.174 ppb            | 0.8 %             | 50.000 ppb             |
| 75As (KED)  | 49.650 ppb            | 1.6 %             | 50.000 ppb             |
| 80Se (KED)  | 49.874 ppb            | 2.4 %             | 50.000 ppb             |
| 85Rb (KED)  | 50.178 ppb            | 0.6 %             | 50.000 ppb             |
| 88Sr (KED)  | 50.002 ppb            | 0.8 %             | 50.000 ppb             |
| 89Y (KED)   | 104.447 %             |                   |                        |
| 107Ag (KED) | 48.857 ppb            | 2.1 %             | 50.000 ppb             |
| 114Cd (KED) | 50.151 ppb            | 2.8 %             | 50.000 ppb             |
| 115In (KED) | 104.497 %             |                   |                        |
| 133Cs (KED) | 49.509 ppb            | 1.8 %             | 50.000 ppb             |
| 138Ba (KED) | 47.712 ppb            | 1.4 %             | 50.000 ppb             |
| 139La (KED) | 49.614 ppb            | 0.6 %             | 50.000 ppb             |
| 140Ce (KED) | 49.924 ppb            | 1.3 %             | 50.000 ppb             |
| 141Pr (KED) | 50.546 ppb            | 0.9 %             | 50.000 ppb             |
| 142Nd (KED) | 47.764 ppb            | 1.1 %             | 50.000 ppb             |
| 152Sm (KED) | 47.723 ppb            | 0.6 %             | 50.000 ppb             |
| 153Eu (KED) | 49.843 ppb            | 1.2 %             | 50.000 ppb             |
| 158Gd (KED) | 46.622 ppb            | 0.5 %             | 50.000 ppb             |
| 159Tb (KED) | 106.134 %             |                   |                        |
| 164Dy (KED) | 46.399 ppb            | 1.2 %             | 50.000 ppb             |
| 166Er (KED) | 47.365 ppb            | 1.2 %             | 50.000 ppb             |
| 169Tm (KED) | 50.107 ppb            | 1.1 %             | 50.000 ppb             |
| 174Yb (KED) | 50.499 ppb            | 0.3 %             | 50.000 ppb             |
| 175Lu (KED) | 50.421 ppb            | 0.8 %             | 50.000 ppb             |
| 205Tl (KED) | 49.637 ppb            | 2.9 %             | 50.000 ppb             |
| 208Pb (KED) | 49.992 ppb            | 1.5 %             | 50.000 ppb             |
| 209Bi (KED) | 102.540 %             |                   |                        |
| 232Th (KED) | 48.851 ppb            | 3.4 %             | 50.000 ppb             |
| 238U (KED)  | 49.694 ppb            | 1.3 %             | 50.000 ppb             |

**Standards:**

Analysis Index: 6  
 Analysis Name: 100+20  
 Analysis Type: STD  
 Analysis Started at: 10/28/2021 3:10:49 PM  
 Standard (Stock): std2  
 Standard DF: 1

| Category    | Concentration average | Concentration RSD | Standard Concentration |
|-------------|-----------------------|-------------------|------------------------|
| 6Li (KED)   | 101.887 %             |                   |                        |
| 9Be (KED)   | 99.120 ppb            | 2.7 %             | 100.000 ppb            |
| 11B (KED)   | 101.082 ppb           | 4.0 %             | 100.000 ppb            |
| 24Mg (KED)  | 99.539 ppb            | 3.3 %             | 100.000 ppb            |
| 27Al (KED)  | 99.721 ppb            | 1.0 %             | 100.000 ppb            |
| 45Sc (KED)  | 106.880 %             |                   |                        |
| 51V (KED)   | 100.093 ppb           | 0.7 %             | 100.000 ppb            |
| 52Cr (KED)  | 100.172 ppb           | 1.5 %             | 100.000 ppb            |
| 55Mn (KED)  | 100.179 ppb           | 0.8 %             | 100.000 ppb            |
| 56Fe (KED)  | 99.938 ppb            | 1.8 %             | 100.000 ppb            |
| 58Ni (KED)  | 99.347 ppb            | 0.8 %             | 100.000 ppb            |
| 59Co (KED)  | 99.566 ppb            | 1.5 %             | 100.000 ppb            |
| 63Cu (KED)  | 99.460 ppb            | 1.2 %             | 100.000 ppb            |
| 64Zn (KED)  | 99.863 ppb            | 1.6 %             | 100.000 ppb            |
| 69Ga (KED)  | 99.838 ppb            | 1.2 %             | 100.000 ppb            |
| 75As (KED)  | 100.096 ppb           | 1.1 %             | 100.000 ppb            |
| 80Se (KED)  | 100.063 ppb           | 0.4 %             | 100.000 ppb            |
| 85Rb (KED)  | 99.844 ppb            | 1.1 %             | 100.000 ppb            |
| 88Sr (KED)  | 99.945 ppb            | 1.1 %             | 100.000 ppb            |
| 89Y (KED)   | 107.315 %             |                   |                        |
| 107Ag (KED) | 100.568 ppb           | 1.5 %             | 100.000 ppb            |
| 114Cd (KED) | 99.858 ppb            | 1.3 %             | 100.000 ppb            |
| 115In (KED) | 106.097 %             |                   |                        |
| 133Cs (KED) | 100.195 ppb           | 1.7 %             | 100.000 ppb            |
| 138Ba (KED) | 101.304 ppb           | 0.8 %             | 100.000 ppb            |
| 139La (KED) | 100.361 ppb           | 1.4 %             | 100.000 ppb            |
| 140Ce (KED) | 100.257 ppb           | 1.8 %             | 100.000 ppb            |
| 141Pr (KED) | 99.903 ppb            | 1.8 %             | 100.000 ppb            |
| 142Nd (KED) | 101.230 ppb           | 1.0 %             | 100.000 ppb            |
| 152Sm (KED) | 101.275 ppb           | 0.6 %             | 100.000 ppb            |
| 153Eu (KED) | 100.252 ppb           | 0.7 %             | 100.000 ppb            |
| 158Gd (KED) | 101.830 ppb           | 1.3 %             | 100.000 ppb            |
| 159Tb (KED) | 107.710 %             |                   |                        |
| 164Dy (KED) | 101.977 ppb           | 1.3 %             | 100.000 ppb            |
| 166Er (KED) | 101.523 ppb           | 0.3 %             | 100.000 ppb            |
| 169Tm (KED) | 99.859 ppb            | 0.4 %             | 100.000 ppb            |
| 174Yb (KED) | 99.977 ppb            | 2.4 %             | 100.000 ppb            |
| 175Lu (KED) | 100.043 ppb           | 2.1 %             | 100.000 ppb            |
| 205Tl (KED) | 100.493 ppb           | 0.8 %             | 100.000 ppb            |
| 208Pb (KED) | 100.280 ppb           | 1.2 %             | 100.000 ppb            |
| 209Bi (KED) | 103.310 %             |                   |                        |
| 232Th (KED) | 100.653 ppb           | 1.0 %             | 100.000 ppb            |
| 238U (KED)  | 100.150 ppb           | 1.7 %             | 100.000 ppb            |

## Sample List Summary:

Instrument ID: iCAP Q

| Index: | Label:     | Main<br>Runs: | Survey<br>Runs: | Start Time:           | User name:                    |
|--------|------------|---------------|-----------------|-----------------------|-------------------------------|
| 1      | water      | 3             | 0               | 10/28/2021 2:55:02 PM | WINDOWS-UPCI4ER\Administrator |
| 2      | blk        | 3             | 0               | 10/28/2021 2:58:01 PM | WINDOWS-UPCI4ER\Administrator |
| 3      | 0+20       | 3             | 0               | 10/28/2021 3:01:12 PM | WINDOWS-UPCI4ER\Administrator |
| 4      | 20+20      | 3             | 0               | 10/28/2021 3:04:15 PM | WINDOWS-UPCI4ER\Administrator |
| 5      | 50+20      | 3             | 0               | 10/28/2021 3:07:37 PM | WINDOWS-UPCI4ER\Administrator |
| 6      | 100+20     | 3             | 0               | 10/28/2021 3:10:49 PM | WINDOWS-UPCI4ER\Administrator |
| 7      | 03039jian  | 3             | 0               | 10/28/2021 3:14:01 PM | WINDOWS-UPCI4ER\Administrator |
| 8      | 03036jian  | 3             | 0               | 10/28/2021 3:17:14 PM | WINDOWS-UPCI4ER\Administrator |
| 9      | 03023ti    | 3             | 0               | 10/28/2021 3:20:14 PM | WINDOWS-UPCI4ER\Administrator |
| 10     | 03001ti    | 3             | 0               | 10/28/2021 3:23:25 PM | WINDOWS-UPCI4ER\Administrator |
| 11     | 03042ti    | 3             | 0               | 10/28/2021 3:26:35 PM | WINDOWS-UPCI4ER\Administrator |
| 12     | 80060jian  | 3             | 0               | 10/28/2021 3:29:45 PM | WINDOWS-UPCI4ER\Administrator |
| 13     | 80176jian  | 3             | 0               | 10/28/2021 3:32:56 PM | WINDOWS-UPCI4ER\Administrator |
| 14     | 80066ti    | 3             | 0               | 10/28/2021 3:36:11 PM | WINDOWS-UPCI4ER\Administrator |
| 15     | 80160ti    | 3             | 0               | 10/28/2021 3:39:22 PM | WINDOWS-UPCI4ER\Administrator |
| 16     | 80030jian  | 3             | 0               | 10/28/2021 3:42:34 PM | WINDOWS-UPCI4ER\Administrator |
| 17     | 80031jian  | 3             | 0               | 10/28/2021 3:45:43 PM | WINDOWS-UPCI4ER\Administrator |
| 18     | 80098ti    | 3             | 0               | 10/28/2021 3:48:52 PM | WINDOWS-UPCI4ER\Administrator |
| 19     | 80131jian  | 3             | 0               | 10/28/2021 3:52:17 PM | WINDOWS-UPCI4ER\Administrator |
| 20     | 80223jian  | 3             | 0               | 10/28/2021 3:55:33 PM | WINDOWS-UPCI4ER\Administrator |
| 21     | 80186jian  | 3             | 0               | 10/28/2021 3:58:40 PM | WINDOWS-UPCI4ER\Administrator |
| 22     | 80061jian  | 3             | 0               | 10/28/2021 4:01:47 PM | WINDOWS-UPCI4ER\Administrator |
| 23     | 80143jian  | 3             | 0               | 10/28/2021 4:04:58 PM | WINDOWS-UPCI4ER\Administrator |
| 24     | 802133jian | 3             | 0               | 10/28/2021 4:08:11 PM | WINDOWS-UPCI4ER\Administrator |
| 25     | 80036jian  | 3             | 0               | 10/28/2021 4:11:22 PM | WINDOWS-UPCI4ER\Administrator |
| 26     | 802158jian | 3             | 0               | 10/28/2021 4:14:33 PM | WINDOWS-UPCI4ER\Administrator |
| 27     | 80075jian  | 3             | 0               | 10/28/2021 4:17:47 PM | WINDOWS-UPCI4ER\Administrator |
| 28     | 803244jian | 3             | 0               | 10/28/2021 4:20:58 PM | WINDOWS-UPCI4ER\Administrator |
| 29     | 805028jian | 3             | 0               | 10/28/2021 4:24:13 PM | WINDOWS-UPCI4ER\Administrator |
| 30     | 80040jian  | 3             | 0               | 10/28/2021 4:27:27 PM | WINDOWS-UPCI4ER\Administrator |
| 31     | 803041jian | 1             | 0               | 10/28/2021 4:30:37 PM | WINDOWS-UPCI4ER\Administrator |
| 32     | 80057jian  | 1             | 0               | 10/28/2021 4:32:44 PM | WINDOWS-UPCI4ER\Administrator |
| 33     | 80119jian  | 1             | 0               | 10/28/2021 4:34:42 PM | WINDOWS-UPCI4ER\Administrator |
| 34     | 802024jian | 1             | 0               | 10/28/2021 4:36:37 PM | WINDOWS-UPCI4ER\Administrator |
| 35     | 801017jian | 1             | 0               | 10/28/2021 4:38:31 PM | WINDOWS-UPCI4ER\Administrator |
| 36     | 80100jian  | 1             | 0               | 10/28/2021 4:40:24 PM | WINDOWS-UPCI4ER\Administrator |
| 37     | 80154jian  | 1             | 0               | 10/28/2021 4:42:18 PM | WINDOWS-UPCI4ER\Administrator |
| 38     | 80142jian  | 1             | 0               | 10/28/2021 4:44:09 PM | WINDOWS-UPCI4ER\Administrator |
| 39     | 701032jian | 1             | 0               | 10/28/2021 4:46:01 PM | WINDOWS-UPCI4ER\Administrator |
| 40     | 80037jian  | 1             | 0               | 10/28/2021 4:47:54 PM | WINDOWS-UPCI4ER\Administrator |
| 41     | 801081jian | 1             | 0               | 10/28/2021 4:49:55 PM | WINDOWS-UPCI4ER\Administrator |
| 42     | 80161jian  | 1             | 0               | 10/28/2021 4:51:46 PM | WINDOWS-UPCI4ER\Administrator |
| 43     | 605134jian | 1             | 0               | 10/28/2021 4:53:35 PM | WINDOWS-UPCI4ER\Administrator |
| 44     | 605271jian | 1             | 0               | 10/28/2021 4:55:29 PM | WINDOWS-UPCI4ER\Administrator |
| 45     | 80144jian  | 1             | 0               | 10/28/2021 4:57:23 PM | WINDOWS-UPCI4ER\Administrator |
| 46     | 80076jian  | 1             | 0               | 10/28/2021 4:59:15 PM | WINDOWS-UPCI4ER\Administrator |
| 47     | 701321jian | 1             | 0               | 10/28/2021 5:01:08 PM | WINDOWS-UPCI4ER\Administrator |
| 48     | 805045jian | 1             | 0               | 10/28/2021 5:02:56 PM | WINDOWS-UPCI4ER\Administrator |
| 49     | 802008jian | 1             | 0               | 10/28/2021 5:04:48 PM | WINDOWS-UPCI4ER\Administrator |
| 50     | 80214jian  | 1             | 0               | 10/28/2021 5:06:43 PM | WINDOWS-UPCI4ER\Administrator |

## Sample Summary

Instrument ID: iCAP Q

Analysis index: 1

Analysis name: water

Analysis started at: 10/28/2021 2:55:02 PM

User name: WINDOWS-UPCI4ER\Administrator

| Category    | Concentration average | Concentration RSD |
|-------------|-----------------------|-------------------|
| 6Li (KED)   | 0.000 %               |                   |
| 11B (KED)   | Infinity ppb          |                   |
| 27Al (KED)  | 15.475 ppb            | 179.3 %           |
| 45Sc (KED)  | 0.079 %               | 18.7 %            |
| 51V (KED)   | 0.296 ppb             | 89.7 %            |
| 52Cr (KED)  | 1.433 ppb             | 48.2 %            |
| 55Mn (KED)  | 1.071 ppb             | 68.3 %            |
| 56Fe (KED)  | 26.955 ppb            | 27.4 %            |
| 58Ni (KED)  | 11.486 ppb            | 21.6 %            |
| 59Co (KED)  | -0.001 ppb            | 0.0 %             |
| 63Cu (KED)  | Infinity ppb          |                   |
| 64Zn (KED)  | Infinity ppb          |                   |
| 80Se (KED)  | Infinity ppb          |                   |
| 89Y (KED)   | 0.000 %               |                   |
| 107Ag (KED) | Infinity ppb          |                   |
| 115In (KED) | 0.000 %               | 173.2 %           |
| 138Ba (KED) | Infinity ppb          |                   |
| 159Tb (KED) | 0.000 %               |                   |
| 205Tl (KED) | 201.445 ppb           | 32.6 %            |
| 208Pb (KED) | 24.958 ppb            | 36.8 %            |
| 209Bi (KED) | 0.000 %               | 12.4 %            |
| 232Th (KED) | 1.068 ppb             | 173.3 %           |
| 238U (KED)  | 0.000 ppb             | 0.0 %             |

| Category    | Concentration average | Intensity average | Intensity RSD |
|-------------|-----------------------|-------------------|---------------|
| 6Li (KED)   | 0.000 %               | 0 cps             |               |
| 9Be (KED)   |                       | 0 cps             |               |
| 11B (KED)   | Infinity ppb          | 19 cps            | 62.0 %        |
| 24Mg (KED)  |                       | 3 cps             | 173.2 %       |
| 27Al (KED)  | 15.475 ppb            | 2 cps             | 173.2 %       |
| 45Sc (KED)  | 0.079 %               | 41 cps            | 18.7 %        |
| 51V (KED)   | 0.296 ppb             | 2 cps             | 86.6 %        |
| 52Cr (KED)  | 1.433 ppb             | 17 cps            | 52.9 %        |
| 55Mn (KED)  | 1.071 ppb             | 7 cps             | 86.6 %        |
| 56Fe (KED)  | 26.955 ppb            | 272 cps           | 13.0 %        |
| 58Ni (KED)  | 11.486 ppb            | 150 cps           | 10.2 %        |
| 59Co (KED)  | -0.001 ppb            | 0 cps             |               |
| 63Cu (KED)  | Infinity ppb          | 23 cps            | 24.7 %        |
| 64Zn (KED)  | Infinity ppb          | 289 cps           | 17.3 %        |
| 69Ga (KED)  |                       | 2 cps             | 86.6 %        |
| 75As (KED)  |                       | 3 cps             | 100.0 %       |
| 80Se (KED)  | Infinity ppb          | 1,141 cps         | 6.7 %         |
| 85Rb (KED)  |                       | 2 cps             | 86.6 %        |
| 88Sr (KED)  |                       | 1 cps             | 173.2 %       |
| 89Y (KED)   | 0.000 %               | 0 cps             |               |
| 107Ag (KED) | Infinity ppb          | 9 cps             | 43.3 %        |
| 114Cd (KED) |                       | 1 cps             | 173.2 %       |
| 115In (KED) | 0.000 %               | 1 cps             | 173.2 %       |
| 133Cs (KED) |                       | 3 cps             | 100.0 %       |
| 138Ba (KED) | Infinity ppb          | 11 cps            | 96.4 %        |

| Category    | Concentration average | Intensity average | Intensity RSD |
|-------------|-----------------------|-------------------|---------------|
| 139La (KED) |                       | 0 cps             |               |
| 140Ce (KED) |                       | 0 cps             |               |
| 141Pr (KED) |                       | 0 cps             |               |
| 142Nd (KED) |                       | 0 cps             |               |
| 152Sm (KED) |                       | 1 cps             | 173.2 %       |
| 153Eu (KED) |                       | 0 cps             |               |
| 158Gd (KED) |                       | 0 cps             |               |
| 159Tb (KED) | 0.000 %               | 0 cps             |               |
| 164Dy (KED) |                       | 0 cps             |               |
| 166Er (KED) |                       | 0 cps             |               |
| 169Tm (KED) |                       | 0 cps             |               |
| 174Yb (KED) |                       | 0 cps             |               |
| 175Lu (KED) |                       | 0 cps             |               |
| 205Tl (KED) | 201.445 ppb           | 172 cps           | 31.0 %        |
| 208Pb (KED) | 24.958 ppb            | 16 cps            | 44.6 %        |
| 209Bi (KED) | 0.000 %               | 16 cps            | 12.4 %        |
| 232Th (KED) | 1.068 ppb             | 1 cps             | 173.2 %       |
| 238U (KED)  | 0.000 ppb             | 0 cps             |               |

## Sample Summary

Instrument ID: iCAP Q

Analysis index: 2

Analysis name: blk

Analysis started at: 10/28/2021 2:58:01 PM

User name: WINDOWS-UPCI4ER\Administrator

| Category    | Concentration average | Concentration RSD |
|-------------|-----------------------|-------------------|
| 6Li (KED)   | 100.000 %             |                   |
| 9Be (KED)   | 0.000 ppb             |                   |
| 11B (KED)   | -0.089 ppb            | 792.1 %           |
| 24Mg (KED)  | -0.077 ppb            | 5.1 %             |
| 27Al (KED)  | 0.208 ppb             | 143.6 %           |
| 45Sc (KED)  | 100.000 %             |                   |
| 51V (KED)   | 0.000 ppb             | 20,600.6 %        |
| 52Cr (KED)  | 0.000 ppb             | 393.2 %           |
| 55Mn (KED)  | 0.001 ppb             | 181.8 %           |
| 56Fe (KED)  | 0.012 ppb             | 80.7 %            |
| 58Ni (KED)  | 0.004 ppb             | 74.6 %            |
| 59Co (KED)  | 0.000 ppb             | 649.6 %           |
| 63Cu (KED)  | 0.007 ppb             | 67.1 %            |
| 64Zn (KED)  | 0.059 ppb             | 71.0 %            |
| 69Ga (KED)  | 0.000 ppb             | 3,164.9 %         |
| 75As (KED)  | 0.003 ppb             | 184.5 %           |
| 80Se (KED)  | -0.150 ppb            | 167.3 %           |
| 85Rb (KED)  | 0.001 ppb             | 253.7 %           |
| 88Sr (KED)  | 0.002 ppb             | 102.7 %           |
| 89Y (KED)   | 100.000 %             |                   |
| 107Ag (KED) | 0.000 ppb             | 649.2 %           |
| 114Cd (KED) | 0.000 ppb             | 259.6 %           |
| 115In (KED) | 100.000 %             |                   |
| 133Cs (KED) | 0.000 ppb             | 33.9 %            |
| 138Ba (KED) | 0.000 ppb             | 284.4 %           |
| 139La (KED) | 0.000 ppb             | 23.2 %            |
| 140Ce (KED) | 0.000 ppb             | 14.3 %            |
| 141Pr (KED) | 0.000 ppb             | 207,325.0 %       |
| 142Nd (KED) | 0.000 ppb             | 33.5 %            |
| 152Sm (KED) | 0.000 ppb             | 3,501.4 %         |
| 153Eu (KED) | 0.000 ppb             | 92.9 %            |
| 158Gd (KED) | 0.000 ppb             | 144.5 %           |
| 159Tb (KED) | 100.000 %             |                   |
| 164Dy (KED) | 0.000 ppb             | 51.9 %            |
| 166Er (KED) | 0.001 ppb             | 127.8 %           |
| 169Tm (KED) | 0.000 ppb             | 98.9 %            |
| 174Yb (KED) | 0.000 ppb             | 127.6 %           |
| 175Lu (KED) | 0.030 ppb             | 36.6 %            |
| 205Tl (KED) | 0.000 ppb             | 1,249.6 %         |
| 208Pb (KED) | 0.001 ppb             | 99.6 %            |
| 209Bi (KED) | 100.000 %             |                   |
| 232Th (KED) | 0.000 ppb             | 86.5 %            |
| 238U (KED)  | 0.000 ppb             | 124.3 %           |

| Category   | Concentration average | Intensity average | Intensity RSD |
|------------|-----------------------|-------------------|---------------|
| 6Li (KED)  | 100.000 %             | 3,063 cps         | 3.6 %         |
| 9Be (KED)  | 0.000 ppb             | 0 cps             |               |
| 11B (KED)  | -0.089 ppb            | 541 cps           | 10.6 %        |
| 24Mg (KED) | -0.077 ppb            | 92 cps            | 4.2 %         |
| 27Al (KED) | 0.208 ppb             | 109 cps           | 40.8 %        |

| Category    | Concentration average | Intensity average | Intensity RSD |
|-------------|-----------------------|-------------------|---------------|
| 45Sc (KED)  | 100.000 %             | 52,097 cps        | 0.9 %         |
| 51V (KED)   | 0.000 ppb             | 2 cps             | 173.2 %       |
| 52Cr (KED)  | 0.000 ppb             | 41 cps            | 40.0 %        |
| 55Mn (KED)  | 0.001 ppb             | 52 cps            | 19.5 %        |
| 56Fe (KED)  | 0.012 ppb             | 2,180 cps         | 5.1 %         |
| 58Ni (KED)  | 0.004 ppb             | 341 cps           | 15.0 %        |
| 59Co (KED)  | 0.000 ppb             | 18 cps            | 43.3 %        |
| 63Cu (KED)  | 0.007 ppb             | 2,161 cps         | 3.3 %         |
| 64Zn (KED)  | 0.059 ppb             | 2,271 cps         | 6.3 %         |
| 69Ga (KED)  | 0.000 ppb             | 36 cps            | 23.6 %        |
| 75As (KED)  | 0.003 ppb             | 16 cps            | 53.9 %        |
| 80Se (KED)  | -0.150 ppb            | 1,112 cps         | 11.5 %        |
| 85Rb (KED)  | 0.001 ppb             | 17 cps            | 52.9 %        |
| 88Sr (KED)  | 0.002 ppb             | 104 cps           | 20.5 %        |
| 89Y (KED)   | 100.000 %             | 481,042 cps       | 2.2 %         |
| 107Ag (KED) | 0.000 ppb             | 24 cps            | 70.0 %        |
| 114Cd (KED) | 0.000 ppb             | 20 cps            | 33.3 %        |
| 115In (KED) | 100.000 %             | 852,011 cps       | 0.9 %         |
| 133Cs (KED) | 0.000 ppb             | 7 cps             | 50.0 %        |
| 138Ba (KED) | 0.000 ppb             | 661 cps           | 9.9 %         |
| 139La (KED) | 0.000 ppb             | 31 cps            | 16.4 %        |
| 140Ce (KED) | 0.000 ppb             | 129 cps           | 5.4 %         |
| 141Pr (KED) | 0.000 ppb             | 7 cps             | 100.0 %       |
| 142Nd (KED) | 0.000 ppb             | 30 cps            | 11.1 %        |
| 152Sm (KED) | 0.000 ppb             | 3 cps             | 100.0 %       |
| 153Eu (KED) | 0.000 ppb             | 3 cps             | 100.0 %       |
| 158Gd (KED) | 0.000 ppb             | 3 cps             | 100.0 %       |
| 159Tb (KED) | 100.000 %             | 4,738,659 cps     | 2.6 %         |
| 164Dy (KED) | 0.000 ppb             | 22 cps            | 31.2 %        |
| 166Er (KED) | 0.001 ppb             | 511 cps           | 14.3 %        |
| 169Tm (KED) | 0.000 ppb             | 3 cps             | 173.2 %       |
| 174Yb (KED) | 0.000 ppb             | 19 cps            | 20.4 %        |
| 175Lu (KED) | 0.030 ppb             | 40,927 cps        | 4.7 %         |
| 205Tl (KED) | 0.000 ppb             | 48 cps            | 14.5 %        |
| 208Pb (KED) | 0.001 ppb             | 4,244 cps         | 3.0 %         |
| 209Bi (KED) | 100.000 %             | 3,561,715 cps     | 1.4 %         |
| 232Th (KED) | 0.000 ppb             | 102 cps           | 10.5 %        |
| 238U (KED)  | 0.000 ppb             | 127 cps           | 57.0 %        |

## Sample Summary

Instrument ID: iCAP Q

Analysis index: 3

Analysis name: 0+20

Analysis started at: 10/28/2021 3:01:12 PM

User name: WINDOWS-UPCI4ER\Administrator

| Category    | Concentration average | Concentration RSD |
|-------------|-----------------------|-------------------|
| 6Li (KED)   | 103.230 %             |                   |
| 9Be (KED)   | 0.000 ppb             |                   |
| 11B (KED)   | 0.000 ppb             | 0.0 %             |
| 24Mg (KED)  | 0.000 ppb             | 0.2 %             |
| 27Al (KED)  | 0.000 ppb             | 0.1 %             |
| 45Sc (KED)  | 100.445 %             |                   |
| 51V (KED)   | 0.000 ppb             | 1.7 %             |
| 52Cr (KED)  | 0.000 ppb             | 0.4 %             |
| 55Mn (KED)  | 0.000 ppb             | 0.1 %             |
| 56Fe (KED)  | 0.000 ppb             | 0.1 %             |
| 58Ni (KED)  | 0.000 ppb             | 0.1 %             |
| 59Co (KED)  | 0.000 ppb             | 0.5 %             |
| 63Cu (KED)  | 0.000 ppb             | 0.1 %             |
| 64Zn (KED)  | 0.000 ppb             | 0.1 %             |
| 69Ga (KED)  | 0.000 ppb             | 0.1 %             |
| 75As (KED)  | 0.000 ppb             | 0.3 %             |
| 80Se (KED)  | 0.000 ppb             | 0.0 %             |
| 85Rb (KED)  | 0.000 ppb             | 1.0 %             |
| 88Sr (KED)  | 0.000 ppb             | 0.1 %             |
| 89Y (KED)   | 100.551 %             |                   |
| 107Ag (KED) | 0.000 ppb             | 0.2 %             |
| 114Cd (KED) | 0.000 ppb             | 0.2 %             |
| 115In (KED) | 102.065 %             |                   |
| 133Cs (KED) | 0.000 ppb             | 0.7 %             |
| 138Ba (KED) | 0.000 ppb             | 0.1 %             |
| 139La (KED) | 0.000 ppb             | 0.4 %             |
| 140Ce (KED) | 0.000 ppb             | 0.1 %             |
| 141Pr (KED) | 0.000 ppb             | 0.5 %             |
| 142Nd (KED) | 0.000 ppb             | 1.0 %             |
| 152Sm (KED) | 0.000 ppb             | 1.0 %             |
| 153Eu (KED) | 0.000 ppb             | 0.9 %             |
| 158Gd (KED) | 0.000 ppb             | 1.2 %             |
| 159Tb (KED) | 99.128 %              |                   |
| 164Dy (KED) | 0.000 ppb             | 0.9 %             |
| 166Er (KED) | 0.000 ppb             | 0.0 %             |
| 169Tm (KED) | 0.000 ppb             | 0.9 %             |
| 174Yb (KED) | 0.000 ppb             | 0.8 %             |
| 175Lu (KED) | 0.000 ppb             | 0.0 %             |
| 205Tl (KED) | 0.000 ppb             | 0.1 %             |
| 208Pb (KED) | 0.000 ppb             | 0.1 %             |
| 209Bi (KED) | 98.827 %              |                   |
| 232Th (KED) | 0.000 ppb             | 0.2 %             |
| 238U (KED)  | 0.000 ppb             | 0.3 %             |

| Category   | Concentration average | Intensity average | Intensity RSD |
|------------|-----------------------|-------------------|---------------|
| 6Li (KED)  | 103.230 %             | 3,162 cps         | 2.8 %         |
| 9Be (KED)  | 0.000 ppb             | 0 cps             |               |
| 11B (KED)  | 0.000 ppb             | 566 cps           | 2.2 %         |
| 24Mg (KED) | 0.000 ppb             | 141 cps           | 14.4 %        |
| 27Al (KED) | 0.000 ppb             | 79 cps            | 12.9 %        |

| Category    | Concentration average | Intensity average | Intensity RSD |
|-------------|-----------------------|-------------------|---------------|
| 45Sc (KED)  | 100.445 %             | 52,329 cps        | 0.5 %         |
| 51V (KED)   | 0.000 ppb             | 2 cps             | 173.2 %       |
| 52Cr (KED)  | 0.000 ppb             | 46 cps            | 37.5 %        |
| 55Mn (KED)  | 0.000 ppb             | 47 cps            | 7.1 %         |
| 56Fe (KED)  | 0.000 ppb             | 2,036 cps         | 5.6 %         |
| 58Ni (KED)  | 0.000 ppb             | 278 cps           | 14.3 %        |
| 59Co (KED)  | 0.000 ppb             | 17 cps            | 52.9 %        |
| 63Cu (KED)  | 0.000 ppb             | 2,029 cps         | 8.0 %         |
| 64Zn (KED)  | 0.000 ppb             | 2,020 cps         | 10.4 %        |
| 69Ga (KED)  | 0.000 ppb             | 36 cps            | 14.3 %        |
| 75As (KED)  | 0.000 ppb             | 11 cps            | 34.6 %        |
| 80Se (KED)  | 0.000 ppb             | 1,180 cps         | 2.4 %         |
| 85Rb (KED)  | 0.000 ppb             | 13 cps            | 100.0 %       |
| 88Sr (KED)  | 0.000 ppb             | 83 cps            | 10.6 %        |
| 89Y (KED)   | 100.551 %             | 483,690 cps       | 0.7 %         |
| 107Ag (KED) | 0.000 ppb             | 28 cps            | 25.0 %        |
| 114Cd (KED) | 0.000 ppb             | 18 cps            | 21.7 %        |
| 115In (KED) | 102.065 %             | 869,605 cps       | 1.3 %         |
| 133Cs (KED) | 0.000 ppb             | 17 cps            | 72.1 %        |
| 138Ba (KED) | 0.000 ppb             | 636 cps           | 6.9 %         |
| 139La (KED) | 0.000 ppb             | 11 cps            | 45.8 %        |
| 140Ce (KED) | 0.000 ppb             | 96 cps            | 13.2 %        |
| 141Pr (KED) | 0.000 ppb             | 7 cps             | 50.0 %        |
| 142Nd (KED) | 0.000 ppb             | 19 cps            | 97.2 %        |
| 152Sm (KED) | 0.000 ppb             | 3 cps             | 100.0 %       |
| 153Eu (KED) | 0.000 ppb             | 7 cps             | 86.6 %        |
| 158Gd (KED) | 0.000 ppb             | 6 cps             | 124.9 %       |
| 159Tb (KED) | 99.128 %              | 4,697,321 cps     | 4.1 %         |
| 164Dy (KED) | 0.000 ppb             | 9 cps             | 86.6 %        |
| 166Er (KED) | 0.000 ppb             | 443 cps           | 0.8 %         |
| 169Tm (KED) | 0.000 ppb             | 9 cps             | 86.6 %        |
| 174Yb (KED) | 0.000 ppb             | 16 cps            | 75.3 %        |
| 175Lu (KED) | 0.000 ppb             | 35,452 cps        | 3.1 %         |
| 205Tl (KED) | 0.000 ppb             | 47 cps            | 12.4 %        |
| 208Pb (KED) | 0.000 ppb             | 4,104 cps         | 7.3 %         |
| 209Bi (KED) | 98.827 %              | 3,519,941 cps     | 0.2 %         |
| 232Th (KED) | 0.000 ppb             | 88 cps            | 15.8 %        |
| 238U (KED)  | 0.000 ppb             | 67 cps            | 34.6 %        |

## Sample Summary

Instrument ID: iCAP Q

Analysis index: 4

Analysis name: 20+20

Analysis started at: 10/28/2021 3:04:15 PM

User name: WINDOWS-UPCI4ER\Administrator

| Category    | Concentration average | Concentration RSD |
|-------------|-----------------------|-------------------|
| 6Li (KED)   | 103.121 %             |                   |
| 9Be (KED)   | 20.368 ppb            | 1.5 %             |
| 11B (KED)   | 15.974 ppb            | 9.4 %             |
| 24Mg (KED)  | 19.752 ppb            | 4.1 %             |
| 27Al (KED)  | 21.227 ppb            | 1.7 %             |
| 45Sc (KED)  | 104.753 %             |                   |
| 51V (KED)   | 20.192 ppb            | 0.8 %             |
| 52Cr (KED)  | 20.181 ppb            | 1.1 %             |
| 55Mn (KED)  | 20.292 ppb            | 0.5 %             |
| 56Fe (KED)  | 20.400 ppb            | 0.7 %             |
| 58Ni (KED)  | 20.622 ppb            | 1.2 %             |
| 59Co (KED)  | 20.648 ppb            | 1.3 %             |
| 63Cu (KED)  | 20.929 ppb            | 1.4 %             |
| 64Zn (KED)  | 20.337 ppb            | 3.6 %             |
| 69Ga (KED)  | 20.375 ppb            | 1.2 %             |
| 75As (KED)  | 20.395 ppb            | 2.1 %             |
| 80Se (KED)  | 20.001 ppb            | 2.0 %             |
| 85Rb (KED)  | 20.336 ppb            | 1.3 %             |
| 88Sr (KED)  | 20.269 ppb            | 0.8 %             |
| 89Y (KED)   | 105.094 %             |                   |
| 107Ag (KED) | 20.018 ppb            | 2.0 %             |
| 114Cd (KED) | 20.333 ppb            | 0.8 %             |
| 115In (KED) | 105.030 %             |                   |
| 133Cs (KED) | 20.253 ppb            | 0.9 %             |
| 138Ba (KED) | 19.199 ppb            | 3.0 %             |
| 139La (KED) | 19.160 ppb            | 0.8 %             |
| 140Ce (KED) | 18.905 ppb            | 2.1 %             |
| 141Pr (KED) | 19.119 ppb            | 1.8 %             |
| 142Nd (KED) | 19.438 ppb            | 1.5 %             |
| 152Sm (KED) | 19.316 ppb            | 1.9 %             |
| 153Eu (KED) | 19.135 ppb            | 1.1 %             |
| 158Gd (KED) | 19.295 ppb            | 1.7 %             |
| 159Tb (KED) | 105.842 %             |                   |
| 164Dy (KED) | 19.116 ppb            | 0.4 %             |
| 166Er (KED) | 18.972 ppb            | 0.8 %             |
| 169Tm (KED) | 20.440 ppb            | 0.9 %             |
| 174Yb (KED) | 18.865 ppb            | 1.4 %             |
| 175Lu (KED) | 18.733 ppb            | 1.6 %             |
| 205Tl (KED) | 18.444 ppb            | 1.8 %             |
| 208Pb (KED) | 18.622 ppb            | 1.4 %             |
| 209Bi (KED) | 103.877 %             |                   |
| 232Th (KED) | 19.608 ppb            | 1.0 %             |
| 238U (KED)  | 20.014 ppb            | 0.9 %             |

| Category   | Concentration average | Intensity average | Intensity RSD |
|------------|-----------------------|-------------------|---------------|
| 6Li (KED)  | 103.121 %             | 3,158 cps         | 3.2 %         |
| 9Be (KED)  | 20.368 ppb            | 2,914 cps         | 1.9 %         |
| 11B (KED)  | 15.974 ppb            | 1,848 cps         | 5.4 %         |
| 24Mg (KED) | 19.752 ppb            | 11,955 cps        | 0.9 %         |
| 27Al (KED) | 21.227 ppb            | 3,296 cps         | 0.3 %         |

| Category    | Concentration average | Intensity average | Intensity RSD |
|-------------|-----------------------|-------------------|---------------|
| 45Sc (KED)  | 104.753 %             | 54,573 cps        | 1.4 %         |
| 51V (KED)   | 20.192 ppb            | 195,225 cps       | 1.0 %         |
| 52Cr (KED)  | 20.181 ppb            | 305,293 cps       | 1.0 %         |
| 55Mn (KED)  | 20.292 ppb            | 153,680 cps       | 1.0 %         |
| 56Fe (KED)  | 20.400 ppb            | 283,120 cps       | 1.4 %         |
| 58Ni (KED)  | 20.622 ppb            | 365,727 cps       | 0.6 %         |
| 59Co (KED)  | 20.648 ppb            | 611,269 cps       | 0.4 %         |
| 63Cu (KED)  | 20.929 ppb            | 452,107 cps       | 0.5 %         |
| 64Zn (KED)  | 20.337 ppb            | 97,868 cps        | 2.0 %         |
| 69Ga (KED)  | 20.375 ppb            | 148,167 cps       | 0.4 %         |
| 75As (KED)  | 20.395 ppb            | 30,054 cps        | 1.1 %         |
| 80Se (KED)  | 20.001 ppb            | 10,031 cps        | 2.0 %         |
| 85Rb (KED)  | 20.336 ppb            | 137,842 cps       | 1.1 %         |
| 88Sr (KED)  | 20.269 ppb            | 194,325 cps       | 1.4 %         |
| 89Y (KED)   | 105.094 %             | 505,544 cps       | 1.5 %         |
| 107Ag (KED) | 20.018 ppb            | 1,211,978 cps     | 1.9 %         |
| 114Cd (KED) | 20.333 ppb            | 385,111 cps       | 0.8 %         |
| 115In (KED) | 105.030 %             | 894,869 cps       | 0.2 %         |
| 133Cs (KED) | 20.253 ppb            | 651,779 cps       | 0.7 %         |
| 138Ba (KED) | 19.199 ppb            | 878,185 cps       | 2.4 %         |
| 139La (KED) | 19.160 ppb            | 1,877,640 cps     | 0.3 %         |
| 140Ce (KED) | 18.905 ppb            | 2,481,264 cps     | 1.1 %         |
| 141Pr (KED) | 19.119 ppb            | 2,614,465 cps     | 1.1 %         |
| 142Nd (KED) | 19.438 ppb            | 1,065,982 cps     | 1.9 %         |
| 152Sm (KED) | 19.316 ppb            | 964,553 cps       | 1.0 %         |
| 153Eu (KED) | 19.135 ppb            | 1,933,934 cps     | 0.4 %         |
| 158Gd (KED) | 19.295 ppb            | 1,305,422 cps     | 0.8 %         |
| 159Tb (KED) | 105.842 %             | 5,015,495 cps     | 1.1 %         |
| 164Dy (KED) | 19.116 ppb            | 1,456,237 cps     | 0.8 %         |
| 166Er (KED) | 18.972 ppb            | 1,716,603 cps     | 1.4 %         |
| 169Tm (KED) | 20.440 ppb            | 6,175,363 cps     | 0.2 %         |
| 174Yb (KED) | 18.865 ppb            | 2,008,015 cps     | 0.7 %         |
| 175Lu (KED) | 18.733 ppb            | 3,412,458 cps     | 1.1 %         |
| 205Tl (KED) | 18.444 ppb            | 3,799,556 cps     | 1.9 %         |
| 208Pb (KED) | 18.622 ppb            | 2,715,571 cps     | 1.8 %         |
| 209Bi (KED) | 103.877 %             | 3,699,815 cps     | 1.1 %         |
| 232Th (KED) | 19.608 ppb            | 5,661,330 cps     | 1.1 %         |
| 238U (KED)  | 20.014 ppb            | 6,827,444 cps     | 0.9 %         |

## Sample Summary

Instrument ID: iCAP Q

Analysis index: 5

Analysis name: 50+20

Analysis started at: 10/28/2021 3:07:37 PM

User name: WINDOWS-UPCI4ER\Administrator

| Category    | Concentration average | Concentration RSD |
|-------------|-----------------------|-------------------|
| 6Li (KED)   | 98.439 %              |                   |
| 9Be (KED)   | 51.613 ppb            | 1.9 %             |
| 11B (KED)   | 49.447 ppb            | 5.0 %             |
| 24Mg (KED)  | 51.022 ppb            | 2.2 %             |
| 27Al (KED)  | 50.068 ppb            | 1.3 %             |
| 45Sc (KED)  | 104.142 %             |                   |
| 51V (KED)   | 49.738 ppb            | 0.8 %             |
| 52Cr (KED)  | 49.584 ppb            | 2.3 %             |
| 55Mn (KED)  | 49.525 ppb            | 1.6 %             |
| 56Fe (KED)  | 49.964 ppb            | 1.2 %             |
| 58Ni (KED)  | 51.057 ppb            | 2.1 %             |
| 59Co (KED)  | 50.610 ppb            | 2.1 %             |
| 63Cu (KED)  | 50.708 ppb            | 0.8 %             |
| 64Zn (KED)  | 50.140 ppb            | 0.5 %             |
| 69Ga (KED)  | 50.174 ppb            | 0.8 %             |
| 75As (KED)  | 49.650 ppb            | 1.6 %             |
| 80Se (KED)  | 49.874 ppb            | 2.4 %             |
| 85Rb (KED)  | 50.178 ppb            | 0.6 %             |
| 88Sr (KED)  | 50.002 ppb            | 0.8 %             |
| 89Y (KED)   | 104.447 %             |                   |
| 107Ag (KED) | 48.857 ppb            | 2.1 %             |
| 114Cd (KED) | 50.151 ppb            | 2.8 %             |
| 115In (KED) | 104.497 %             |                   |
| 133Cs (KED) | 49.509 ppb            | 1.8 %             |
| 138Ba (KED) | 47.712 ppb            | 1.4 %             |
| 139La (KED) | 49.614 ppb            | 0.6 %             |
| 140Ce (KED) | 49.924 ppb            | 1.3 %             |
| 141Pr (KED) | 50.546 ppb            | 0.9 %             |
| 142Nd (KED) | 47.764 ppb            | 1.1 %             |
| 152Sm (KED) | 47.723 ppb            | 0.6 %             |
| 153Eu (KED) | 49.843 ppb            | 1.2 %             |
| 158Gd (KED) | 46.622 ppb            | 0.5 %             |
| 159Tb (KED) | 106.134 %             |                   |
| 164Dy (KED) | 46.399 ppb            | 1.2 %             |
| 166Er (KED) | 47.365 ppb            | 1.2 %             |
| 169Tm (KED) | 50.107 ppb            | 1.1 %             |
| 174Yb (KED) | 50.499 ppb            | 0.3 %             |
| 175Lu (KED) | 50.421 ppb            | 0.8 %             |
| 205Tl (KED) | 49.637 ppb            | 2.9 %             |
| 208Pb (KED) | 49.992 ppb            | 1.5 %             |
| 209Bi (KED) | 102.540 %             |                   |
| 232Th (KED) | 48.851 ppb            | 3.4 %             |
| 238U (KED)  | 49.694 ppb            | 1.3 %             |

| Category   | Concentration average | Intensity average | Intensity RSD |
|------------|-----------------------|-------------------|---------------|
| 6Li (KED)  | 98.439 %              | 3,015 cps         | 1.2 %         |
| 9Be (KED)  | 51.613 ppb            | 7,050 cps         | 1.7 %         |
| 11B (KED)  | 49.447 ppb            | 4,333 cps         | 3.2 %         |
| 24Mg (KED) | 51.022 ppb            | 29,287 cps        | 1.0 %         |
| 27Al (KED) | 50.068 ppb            | 7,619 cps         | 1.7 %         |

| Category    | Concentration average | Intensity average | Intensity RSD |
|-------------|-----------------------|-------------------|---------------|
| 45Sc (KED)  | 104.142 %             | 54,256 cps        | 1.4 %         |
| 51V (KED)   | 49.738 ppb            | 478,067 cps       | 0.7 %         |
| 52Cr (KED)  | 49.584 ppb            | 745,553 cps       | 1.3 %         |
| 55Mn (KED)  | 49.525 ppb            | 372,789 cps       | 0.7 %         |
| 56Fe (KED)  | 49.964 ppb            | 686,296 cps       | 1.1 %         |
| 58Ni (KED)  | 51.057 ppb            | 899,747 cps       | 1.1 %         |
| 59Co (KED)  | 50.610 ppb            | 1,489,388 cps     | 0.8 %         |
| 63Cu (KED)  | 50.708 ppb            | 1,085,783 cps     | 0.7 %         |
| 64Zn (KED)  | 50.140 ppb            | 236,810 cps       | 0.4 %         |
| 69Ga (KED)  | 50.174 ppb            | 362,615 cps       | 0.8 %         |
| 75As (KED)  | 49.650 ppb            | 72,708 cps        | 1.6 %         |
| 80Se (KED)  | 49.874 ppb            | 23,029 cps        | 2.4 %         |
| 85Rb (KED)  | 50.178 ppb            | 338,032 cps       | 0.6 %         |
| 88Sr (KED)  | 50.002 ppb            | 476,323 cps       | 0.9 %         |
| 89Y (KED)   | 104.447 %             | 502,432 cps       | 0.4 %         |
| 107Ag (KED) | 48.857 ppb            | 2,942,454 cps     | 1.2 %         |
| 114Cd (KED) | 50.151 ppb            | 944,835 cps       | 2.0 %         |
| 115In (KED) | 104.497 %             | 890,324 cps       | 1.5 %         |
| 133Cs (KED) | 49.509 ppb            | 1,584,895 cps     | 0.7 %         |
| 138Ba (KED) | 47.712 ppb            | 2,187,909 cps     | 2.3 %         |
| 139La (KED) | 49.614 ppb            | 4,875,637 cps     | 0.7 %         |
| 140Ce (KED) | 49.924 ppb            | 6,570,973 cps     | 1.1 %         |
| 141Pr (KED) | 50.546 ppb            | 6,931,776 cps     | 1.2 %         |
| 142Nd (KED) | 47.764 ppb            | 2,626,660 cps     | 1.7 %         |
| 152Sm (KED) | 47.723 ppb            | 2,390,025 cps     | 1.6 %         |
| 153Eu (KED) | 49.843 ppb            | 5,051,493 cps     | 0.6 %         |
| 158Gd (KED) | 46.622 ppb            | 3,163,173 cps     | 0.8 %         |
| 159Tb (KED) | 106.134 %             | 5,029,330 cps     | 1.1 %         |
| 164Dy (KED) | 46.399 ppb            | 3,544,427 cps     | 1.7 %         |
| 166Er (KED) | 47.365 ppb            | 4,297,048 cps     | 2.1 %         |
| 169Tm (KED) | 50.107 ppb            | 15,181,401 cps    | 2.0 %         |
| 174Yb (KED) | 50.499 ppb            | 5,390,592 cps     | 1.2 %         |
| 175Lu (KED) | 50.421 ppb            | 9,147,086 cps     | 1.8 %         |
| 205Tl (KED) | 49.637 ppb            | 10,092,252 cps    | 2.0 %         |
| 208Pb (KED) | 49.992 ppb            | 7,188,481 cps     | 0.6 %         |
| 209Bi (KED) | 102.540 %             | 3,652,184 cps     | 1.0 %         |
| 232Th (KED) | 48.851 ppb            | 13,920,474 cps    | 2.5 %         |
| 238U (KED)  | 49.694 ppb            | 16,733,437 cps    | 0.5 %         |

## Sample Summary

Instrument ID: iCAP Q

Analysis index: 6

Analysis name: 100+20

Analysis started at: 10/28/2021 3:10:49 PM

User name: WINDOWS-UPCI4ER\Administrator

| Category    | Concentration average | Concentration RSD |
|-------------|-----------------------|-------------------|
| 6Li (KED)   | 101.887 %             |                   |
| 9Be (KED)   | 99.120 ppb            | 2.7 %             |
| 11B (KED)   | 101.082 ppb           | 4.0 %             |
| 24Mg (KED)  | 99.539 ppb            | 3.3 %             |
| 27Al (KED)  | 99.721 ppb            | 1.0 %             |
| 45Sc (KED)  | 106.880 %             |                   |
| 51V (KED)   | 100.093 ppb           | 0.7 %             |
| 52Cr (KED)  | 100.172 ppb           | 1.5 %             |
| 55Mn (KED)  | 100.179 ppb           | 0.8 %             |
| 56Fe (KED)  | 99.938 ppb            | 1.8 %             |
| 58Ni (KED)  | 99.347 ppb            | 0.8 %             |
| 59Co (KED)  | 99.566 ppb            | 1.5 %             |
| 63Cu (KED)  | 99.460 ppb            | 1.2 %             |
| 64Zn (KED)  | 99.863 ppb            | 1.6 %             |
| 69Ga (KED)  | 99.838 ppb            | 1.2 %             |
| 75As (KED)  | 100.096 ppb           | 1.1 %             |
| 80Se (KED)  | 100.063 ppb           | 0.4 %             |
| 85Rb (KED)  | 99.844 ppb            | 1.1 %             |
| 88Sr (KED)  | 99.945 ppb            | 1.1 %             |
| 89Y (KED)   | 107.315 %             |                   |
| 107Ag (KED) | 100.568 ppb           | 1.5 %             |
| 114Cd (KED) | 99.858 ppb            | 1.3 %             |
| 115In (KED) | 106.097 %             |                   |
| 133Cs (KED) | 100.195 ppb           | 1.7 %             |
| 138Ba (KED) | 101.304 ppb           | 0.8 %             |
| 139La (KED) | 100.361 ppb           | 1.4 %             |
| 140Ce (KED) | 100.257 ppb           | 1.8 %             |
| 141Pr (KED) | 99.903 ppb            | 1.8 %             |
| 142Nd (KED) | 101.230 ppb           | 1.0 %             |
| 152Sm (KED) | 101.275 ppb           | 0.6 %             |
| 153Eu (KED) | 100.252 ppb           | 0.7 %             |
| 158Gd (KED) | 101.830 ppb           | 1.3 %             |
| 159Tb (KED) | 107.710 %             |                   |
| 164Dy (KED) | 101.977 ppb           | 1.3 %             |
| 166Er (KED) | 101.523 ppb           | 0.3 %             |
| 169Tm (KED) | 99.859 ppb            | 0.4 %             |
| 174Yb (KED) | 99.977 ppb            | 2.4 %             |
| 175Lu (KED) | 100.043 ppb           | 2.1 %             |
| 205Tl (KED) | 100.493 ppb           | 0.8 %             |
| 208Pb (KED) | 100.280 ppb           | 1.2 %             |
| 209Bi (KED) | 103.310 %             |                   |
| 232Th (KED) | 100.653 ppb           | 1.0 %             |
| 238U (KED)  | 100.150 ppb           | 1.7 %             |

| Category   | Concentration average | Intensity average | Intensity RSD |
|------------|-----------------------|-------------------|---------------|
| 6Li (KED)  | 101.887 %             | 3,120 cps         | 3.5 %         |
| 9Be (KED)  | 99.120 ppb            | 14,006 cps        | 1.3 %         |
| 11B (KED)  | 101.082 ppb           | 8,581 cps         | 0.9 %         |
| 24Mg (KED) | 99.539 ppb            | 58,976 cps        | 2.0 %         |
| 27Al (KED) | 99.721 ppb            | 15,491 cps        | 0.9 %         |

| Category    | Concentration average | Intensity average | Intensity RSD |
|-------------|-----------------------|-------------------|---------------|
| 45Sc (KED)  | 106.880 %             | 55,682 cps        | 0.2 %         |
| 51V (KED)   | 100.093 ppb           | 987,427 cps       | 0.8 %         |
| 52Cr (KED)  | 100.172 ppb           | 1,546,053 cps     | 1.5 %         |
| 55Mn (KED)  | 100.179 ppb           | 773,950 cps       | 0.8 %         |
| 56Fe (KED)  | 99.938 ppb            | 1,406,762 cps     | 1.9 %         |
| 58Ni (KED)  | 99.347 ppb            | 1,796,783 cps     | 0.9 %         |
| 59Co (KED)  | 99.566 ppb            | 3,007,688 cps     | 1.5 %         |
| 63Cu (KED)  | 99.460 ppb            | 2,186,024 cps     | 1.3 %         |
| 64Zn (KED)  | 99.863 ppb            | 482,421 cps       | 0.9 %         |
| 69Ga (KED)  | 99.838 ppb            | 741,329 cps       | 1.7 %         |
| 75As (KED)  | 100.096 ppb           | 150,584 cps       | 0.2 %         |
| 80Se (KED)  | 100.063 ppb           | 46,205 cps        | 1.6 %         |
| 85Rb (KED)  | 99.844 ppb            | 691,014 cps       | 0.1 %         |
| 88Sr (KED)  | 99.945 ppb            | 978,068 cps       | 0.6 %         |
| 89Y (KED)   | 107.315 %             | 516,232 cps       | 1.2 %         |
| 107Ag (KED) | 100.568 ppb           | 6,149,972 cps     | 0.5 %         |
| 114Cd (KED) | 99.858 ppb            | 1,910,315 cps     | 0.4 %         |
| 115In (KED) | 106.097 %             | 903,960 cps       | 1.0 %         |
| 133Cs (KED) | 100.195 ppb           | 3,256,919 cps     | 1.5 %         |
| 138Ba (KED) | 101.304 ppb           | 4,713,266 cps     | 0.6 %         |
| 139La (KED) | 100.361 ppb           | 10,009,190 cps    | 1.2 %         |
| 140Ce (KED) | 100.257 ppb           | 13,392,033 cps    | 1.5 %         |
| 141Pr (KED) | 99.903 ppb            | 13,904,238 cps    | 1.8 %         |
| 142Nd (KED) | 101.230 ppb           | 5,649,300 cps     | 0.7 %         |
| 152Sm (KED) | 101.275 ppb           | 5,147,110 cps     | 0.3 %         |
| 153Eu (KED) | 100.252 ppb           | 10,311,913 cps    | 0.6 %         |
| 158Gd (KED) | 101.830 ppb           | 7,011,705 cps     | 1.3 %         |
| 159Tb (KED) | 107.710 %             | 5,104,032 cps     | 0.3 %         |
| 164Dy (KED) | 101.977 ppb           | 7,905,388 cps     | 1.0 %         |
| 166Er (KED) | 101.523 ppb           | 9,346,055 cps     | 0.5 %         |
| 169Tm (KED) | 99.859 ppb            | 30,702,988 cps    | 0.3 %         |
| 174Yb (KED) | 99.977 ppb            | 10,830,192 cps    | 2.2 %         |
| 175Lu (KED) | 100.043 ppb           | 18,379,055 cps    | 1.9 %         |
| 205Tl (KED) | 100.493 ppb           | 20,589,574 cps    | 0.7 %         |
| 208Pb (KED) | 100.280 ppb           | 14,524,982 cps    | 1.2 %         |
| 209Bi (KED) | 103.310 %             | 3,679,624 cps     | 0.1 %         |
| 232Th (KED) | 100.653 ppb           | 28,902,877 cps    | 0.9 %         |
| 238U (KED)  | 100.150 ppb           | 33,979,181 cps    | 1.6 %         |

## Sample Summary

Instrument ID: iCAP Q

Analysis index: 7

Analysis name: 03039jian

Analysis started at: 10/28/2021 3:14:01 PM

User name: WINDOWS-UPCI4ER\Administrator

| Category    | Concentration average | Concentration RSD |
|-------------|-----------------------|-------------------|
| 6Li (KED)   | 102.649 %             | 0.8 %             |
| 9Be (KED)   | 0.039 ppb             | 91.6 %            |
| 11B (KED)   | 13.522 ppb            | 4.9 %             |
| 24Mg (KED)  | 138.447 ppb           | 0.9 %             |
| 27Al (KED)  | 152.483 ppb           | 1.6 %             |
| 45Sc (KED)  | 98.295 %              | 1.4 %             |
| 51V (KED)   | 0.315 ppb             | 0.6 %             |
| 52Cr (KED)  | 1.480 ppb             | 2.3 %             |
| 55Mn (KED)  | 3.994 ppb             | 1.9 %             |
| 56Fe (KED)  | 183.142 ppb           | 2.2 %             |
| 58Ni (KED)  | 1.024 ppb             | 0.9 %             |
| 59Co (KED)  | 0.094 ppb             | 5.8 %             |
| 63Cu (KED)  | 2.681 ppb             | 1.7 %             |
| 64Zn (KED)  | 51.054 ppb            | 1.3 %             |
| 69Ga (KED)  | 0.701 ppb             | 4.0 %             |
| 75As (KED)  | 0.127 ppb             | 11.3 %            |
| 80Se (KED)  | -0.014 ppb            | 1,272.9 %         |
| 85Rb (KED)  | 0.400 ppb             | 3.3 %             |
| 88Sr (KED)  | 2.591 ppb             | 1.7 %             |
| 89Y (KED)   | 100.441 %             | 1.2 %             |
| 107Ag (KED) | 0.053 ppb             | 10.1 %            |
| 114Cd (KED) | 0.016 ppb             | 9.7 %             |
| 115In (KED) | 98.862 %              | 0.5 %             |
| 133Cs (KED) | 0.025 ppb             | 11.3 %            |
| 138Ba (KED) | 2.418 ppb             | 3.7 %             |
| 139La (KED) | 0.193 ppb             | 3.7 %             |
| 140Ce (KED) | 0.400 ppb             | 3.5 %             |
| 141Pr (KED) | 0.051 ppb             | 7.6 %             |
| 142Nd (KED) | 0.250 ppb             | 4.1 %             |
| 152Sm (KED) | 0.033 ppb             | 11.1 %            |
| 153Eu (KED) | 0.009 ppb             | 27.3 %            |
| 158Gd (KED) | 0.027 ppb             | 15.0 %            |
| 159Tb (KED) | 101.793 %             | 2.8 %             |
| 164Dy (KED) | 0.020 ppb             | 18.2 %            |
| 166Er (KED) | 0.011 ppb             | 30.7 %            |
| 169Tm (KED) | 0.004 ppb             | 61.0 %            |
| 174Yb (KED) | 0.011 ppb             | 36.2 %            |
| 175Lu (KED) | -0.067 ppb            | 18.2 %            |
| 205Tl (KED) | 0.007 ppb             | 27.0 %            |
| 208Pb (KED) | 0.319 ppb             | 1.6 %             |
| 209Bi (KED) | 98.040 %              | 0.9 %             |
| 232Th (KED) | 0.146 ppb             | 53.7 %            |
| 238U (KED)  | 0.016 ppb             | 24.0 %            |

| Category   | Concentration average | Intensity average | Intensity RSD |
|------------|-----------------------|-------------------|---------------|
| 6Li (KED)  | 102.649 %             | 3,144 cps         | 0.8 %         |
| 9Be (KED)  | 0.039 ppb             | 6 cps             | 91.7 %        |
| 11B (KED)  | 13.522 ppb            | 1,645 cps         | 2.4 %         |
| 24Mg (KED) | 138.447 ppb           | 82,643 cps        | 1.5 %         |
| 27Al (KED) | 152.483 ppb           | 21,747 cps        | 3.0 %         |

| Category    | Concentration average | Intensity average | Intensity RSD |
|-------------|-----------------------|-------------------|---------------|
| 45Sc (KED)  | 98.295 %              | 51,209 cps        | 1.4 %         |
| 51V (KED)   | 0.315 ppb             | 2,858 cps         | 2.0 %         |
| 52Cr (KED)  | 1.480 ppb             | 21,056 cps        | 2.0 %         |
| 55Mn (KED)  | 3.994 ppb             | 28,418 cps        | 1.9 %         |
| 56Fe (KED)  | 183.142 ppb           | 2,368,756 cps     | 0.9 %         |
| 58Ni (KED)  | 1.024 ppb             | 17,293 cps        | 0.9 %         |
| 59Co (KED)  | 0.094 ppb             | 2,623 cps         | 6.8 %         |
| 63Cu (KED)  | 2.681 ppb             | 57,110 cps        | 0.9 %         |
| 64Zn (KED)  | 51.054 ppb            | 231,826 cps       | 0.8 %         |
| 69Ga (KED)  | 0.701 ppb             | 4,909 cps         | 5.1 %         |
| 75As (KED)  | 0.127 ppb             | 190 cps           | 11.0 %        |
| 80Se (KED)  | -0.014 ppb            | 1,172 cps         | 5.4 %         |
| 85Rb (KED)  | 0.400 ppb             | 2,606 cps         | 2.8 %         |
| 88Sr (KED)  | 2.591 ppb             | 23,809 cps        | 1.1 %         |
| 89Y (KED)   | 100.441 %             | 483,162 cps       | 1.2 %         |
| 107Ag (KED) | 0.053 ppb             | 3,020 cps         | 9.8 %         |
| 114Cd (KED) | 0.016 ppb             | 302 cps           | 9.6 %         |
| 115In (KED) | 98.862 %              | 842,312 cps       | 0.5 %         |
| 133Cs (KED) | 0.025 ppb             | 770 cps           | 11.4 %        |
| 138Ba (KED) | 2.418 ppb             | 106,875 cps       | 1.2 %         |
| 139La (KED) | 0.193 ppb             | 18,184 cps        | 1.1 %         |
| 140Ce (KED) | 0.400 ppb             | 50,506 cps        | 1.6 %         |
| 141Pr (KED) | 0.051 ppb             | 6,656 cps         | 4.7 %         |
| 142Nd (KED) | 0.250 ppb             | 13,215 cps        | 1.3 %         |
| 152Sm (KED) | 0.033 ppb             | 1,601 cps         | 8.2 %         |
| 153Eu (KED) | 0.009 ppb             | 894 cps           | 24.1 %        |
| 158Gd (KED) | 0.027 ppb             | 1,763 cps         | 12.3 %        |
| 159Tb (KED) | 101.793 %             | 4,823,626 cps     | 2.8 %         |
| 164Dy (KED) | 0.020 ppb             | 1,477 cps         | 15.1 %        |
| 166Er (KED) | 0.011 ppb             | 1,377 cps         | 17.6 %        |
| 169Tm (KED) | 0.004 ppb             | 1,180 cps         | 57.6 %        |
| 174Yb (KED) | 0.011 ppb             | 1,116 cps         | 32.7 %        |
| 175Lu (KED) | -0.067 ppb            | 24,729 cps        | 5.8 %         |
| 205Tl (KED) | 0.007 ppb             | 1,443 cps         | 26.1 %        |
| 208Pb (KED) | 0.319 ppb             | 47,954 cps        | 0.9 %         |
| 209Bi (KED) | 98.040 %              | 3,491,909 cps     | 0.9 %         |
| 232Th (KED) | 0.146 ppb             | 39,963 cps        | 53.8 %        |
| 238U (KED)  | 0.016 ppb             | 5,264 cps         | 23.7 %        |

## Sample Summary

Instrument ID: iCAP Q

Analysis index: 8

Analysis name: 03036jian

Analysis started at: 10/28/2021 3:17:14 PM

User name: WINDOWS-UPCI4ER\Administrator

| Category    | Concentration average | Concentration RSD |
|-------------|-----------------------|-------------------|
| 6Li (KED)   | 102.830 %             | 1.8 %             |
| 9Be (KED)   | 0.047 ppb             | 51.6 %            |
| 11B (KED)   | 4.192 ppb             | 11.0 %            |
| 24Mg (KED)  | 147.632 ppb           | 4.3 %             |
| 27Al (KED)  | 152.570 ppb           | 1.3 %             |
| 45Sc (KED)  | 99.407 %              | 3.2 %             |
| 51V (KED)   | 0.279 ppb             | 2.5 %             |
| 52Cr (KED)  | 1.375 ppb             | 0.9 %             |
| 55Mn (KED)  | 3.329 ppb             | 1.3 %             |
| 56Fe (KED)  | 153.311 ppb           | 1.9 %             |
| 58Ni (KED)  | 1.037 ppb             | 3.3 %             |
| 59Co (KED)  | 0.074 ppb             | 4.6 %             |
| 63Cu (KED)  | 2.828 ppb             | 0.5 %             |
| 64Zn (KED)  | 55.793 ppb            | 1.2 %             |
| 69Ga (KED)  | 0.627 ppb             | 6.6 %             |
| 75As (KED)  | 0.107 ppb             | 9.5 %             |
| 80Se (KED)  | 0.154 ppb             | 111.3 %           |
| 85Rb (KED)  | 1.264 ppb             | 4.1 %             |
| 88Sr (KED)  | 2.595 ppb             | 2.4 %             |
| 89Y (KED)   | 98.385 %              | 0.7 %             |
| 107Ag (KED) | 0.109 ppb             | 2.5 %             |
| 114Cd (KED) | 0.015 ppb             | 9.9 %             |
| 115In (KED) | 97.006 %              | 0.6 %             |
| 133Cs (KED) | 0.024 ppb             | 8.3 %             |
| 138Ba (KED) | 2.067 ppb             | 1.6 %             |
| 139La (KED) | 0.173 ppb             | 2.6 %             |
| 140Ce (KED) | 0.393 ppb             | 4.5 %             |
| 141Pr (KED) | 0.045 ppb             | 4.7 %             |
| 142Nd (KED) | 0.239 ppb             | 2.7 %             |
| 152Sm (KED) | 0.027 ppb             | 8.9 %             |
| 153Eu (KED) | 0.006 ppb             | 12.0 %            |
| 158Gd (KED) | 0.023 ppb             | 11.5 %            |
| 159Tb (KED) | 100.716 %             | 2.5 %             |
| 164Dy (KED) | 0.016 ppb             | 11.7 %            |
| 166Er (KED) | 0.007 ppb             | 22.4 %            |
| 169Tm (KED) | 0.002 ppb             | 49.0 %            |
| 174Yb (KED) | 0.007 ppb             | 14.4 %            |
| 175Lu (KED) | -0.077 ppb            | 11.0 %            |
| 205Tl (KED) | 0.004 ppb             | 2.5 %             |
| 208Pb (KED) | 0.371 ppb             | 3.1 %             |
| 209Bi (KED) | 96.708 %              | 0.6 %             |
| 232Th (KED) | 0.050 ppb             | 15.5 %            |
| 238U (KED)  | 0.013 ppb             | 6.6 %             |

| Category   | Concentration average | Intensity average | Intensity RSD |
|------------|-----------------------|-------------------|---------------|
| 6Li (KED)  | 102.830 %             | 3,149 cps         | 1.8 %         |
| 9Be (KED)  | 0.047 ppb             | 7 cps             | 50.0 %        |
| 11B (KED)  | 4.192 ppb             | 900 cps           | 5.5 %         |
| 24Mg (KED) | 147.632 ppb           | 88,244 cps        | 3.7 %         |
| 27Al (KED) | 152.570 ppb           | 21,998 cps        | 2.6 %         |

| Category    | Concentration average | Intensity average | Intensity RSD |
|-------------|-----------------------|-------------------|---------------|
| 45Sc (KED)  | 99.407 %              | 51,788 cps        | 3.2 %         |
| 51V (KED)   | 0.279 ppb             | 2,564 cps         | 2.2 %         |
| 52Cr (KED)  | 1.375 ppb             | 19,782 cps        | 2.9 %         |
| 55Mn (KED)  | 3.329 ppb             | 23,961 cps        | 2.9 %         |
| 56Fe (KED)  | 153.311 ppb           | 2,005,290 cps     | 1.5 %         |
| 58Ni (KED)  | 1.037 ppb             | 17,699 cps        | 0.9 %         |
| 59Co (KED)  | 0.074 ppb             | 2,088 cps         | 3.8 %         |
| 63Cu (KED)  | 2.828 ppb             | 58,905 cps        | 0.3 %         |
| 64Zn (KED)  | 55.793 ppb            | 248,009 cps       | 1.9 %         |
| 69Ga (KED)  | 0.627 ppb             | 4,301 cps         | 7.2 %         |
| 75As (KED)  | 0.107 ppb             | 159 cps           | 8.5 %         |
| 80Se (KED)  | 0.154 ppb             | 1,218 cps         | 5.2 %         |
| 85Rb (KED)  | 1.264 ppb             | 8,034 cps         | 4.3 %         |
| 88Sr (KED)  | 2.595 ppb             | 23,364 cps        | 3.1 %         |
| 89Y (KED)   | 98.385 %              | 473,274 cps       | 0.7 %         |
| 107Ag (KED) | 0.109 ppb             | 6,127 cps         | 2.7 %         |
| 114Cd (KED) | 0.015 ppb             | 283 cps           | 9.6 %         |
| 115In (KED) | 97.006 %              | 826,505 cps       | 0.6 %         |
| 133Cs (KED) | 0.024 ppb             | 741 cps           | 8.6 %         |
| 138Ba (KED) | 2.067 ppb             | 90,548 cps        | 1.4 %         |
| 139La (KED) | 0.173 ppb             | 16,156 cps        | 1.0 %         |
| 140Ce (KED) | 0.393 ppb             | 49,171 cps        | 1.9 %         |
| 141Pr (KED) | 0.045 ppb             | 5,807 cps         | 2.3 %         |
| 142Nd (KED) | 0.239 ppb             | 12,476 cps        | 0.1 %         |
| 152Sm (KED) | 0.027 ppb             | 1,300 cps         | 6.9 %         |
| 153Eu (KED) | 0.006 ppb             | 542 cps           | 9.2 %         |
| 158Gd (KED) | 0.023 ppb             | 1,497 cps         | 10.1 %        |
| 159Tb (KED) | 100.716 %             | 4,772,611 cps     | 2.5 %         |
| 164Dy (KED) | 0.016 ppb             | 1,160 cps         | 10.1 %        |
| 166Er (KED) | 0.007 ppb             | 1,084 cps         | 11.1 %        |
| 169Tm (KED) | 0.002 ppb             | 541 cps           | 45.4 %        |
| 174Yb (KED) | 0.007 ppb             | 722 cps           | 11.4 %        |
| 175Lu (KED) | -0.077 ppb            | 22,874 cps        | 4.4 %         |
| 205Tl (KED) | 0.004 ppb             | 793 cps           | 2.2 %         |
| 208Pb (KED) | 0.371 ppb             | 54,232 cps        | 2.4 %         |
| 209Bi (KED) | 96.708 %              | 3,444,459 cps     | 0.6 %         |
| 232Th (KED) | 0.050 ppb             | 13,574 cps        | 14.9 %        |
| 238U (KED)  | 0.013 ppb             | 4,194 cps         | 6.0 %         |

## Sample Summary

Instrument ID: iCAP Q

Analysis index: 9

Analysis name: 03023ti

Analysis started at: 10/28/2021 3:20:14 PM

User name: WINDOWS-UPCI4ER\Administrator

| Category    | Concentration average | Concentration RSD |
|-------------|-----------------------|-------------------|
| 6Li (KED)   | 108.056 %             | 3.1 %             |
| 9Be (KED)   | 0.015 ppb             | 86.6 %            |
| 11B (KED)   | 10.222 ppb            | 16.7 %            |
| 24Mg (KED)  | 166.269 ppb           | 3.6 %             |
| 27Al (KED)  | 167.268 ppb           | 0.4 %             |
| 45Sc (KED)  | 100.422 %             | 1.6 %             |
| 51V (KED)   | 0.354 ppb             | 1.4 %             |
| 52Cr (KED)  | 1.173 ppb             | 0.7 %             |
| 55Mn (KED)  | 4.818 ppb             | 0.8 %             |
| 56Fe (KED)  | 205.539 ppb           | 1.0 %             |
| 58Ni (KED)  | 0.992 ppb             | 1.5 %             |
| 59Co (KED)  | 0.106 ppb             | 6.4 %             |
| 63Cu (KED)  | 3.284 ppb             | 1.0 %             |
| 64Zn (KED)  | 56.364 ppb            | 2.1 %             |
| 69Ga (KED)  | 0.845 ppb             | 3.7 %             |
| 75As (KED)  | 0.141 ppb             | 15.4 %            |
| 80Se (KED)  | 0.012 ppb             | 615.7 %           |
| 85Rb (KED)  | 0.667 ppb             | 2.0 %             |
| 88Sr (KED)  | 3.171 ppb             | 2.0 %             |
| 89Y (KED)   | 100.781 %             | 1.0 %             |
| 107Ag (KED) | 0.019 ppb             | 6.1 %             |
| 114Cd (KED) | 0.017 ppb             | 6.3 %             |
| 115In (KED) | 98.540 %              | 1.1 %             |
| 133Cs (KED) | 0.026 ppb             | 9.2 %             |
| 138Ba (KED) | 2.928 ppb             | 4.2 %             |
| 139La (KED) | 0.227 ppb             | 5.1 %             |
| 140Ce (KED) | 0.483 ppb             | 3.3 %             |
| 141Pr (KED) | 0.052 ppb             | 3.6 %             |
| 142Nd (KED) | 0.286 ppb             | 7.0 %             |
| 152Sm (KED) | 0.036 ppb             | 6.2 %             |
| 153Eu (KED) | 0.007 ppb             | 11.9 %            |
| 158Gd (KED) | 0.030 ppb             | 5.7 %             |
| 159Tb (KED) | 100.190 %             | 4.1 %             |
| 164Dy (KED) | 0.019 ppb             | 7.0 %             |
| 166Er (KED) | 0.010 ppb             | 17.0 %            |
| 169Tm (KED) | 0.001 ppb             | 21.4 %            |
| 174Yb (KED) | 0.008 ppb             | 8.7 %             |
| 175Lu (KED) | -0.074 ppb            | 7.4 %             |
| 205Tl (KED) | 0.003 ppb             | 4.6 %             |
| 208Pb (KED) | 0.349 ppb             | 1.3 %             |
| 209Bi (KED) | 98.264 %              | 1.7 %             |
| 232Th (KED) | 0.053 ppb             | 0.7 %             |
| 238U (KED)  | 0.012 ppb             | 3.0 %             |

| Category   | Concentration average | Intensity average | Intensity RSD |
|------------|-----------------------|-------------------|---------------|
| 6Li (KED)  | 108.056 %             | 3,309 cps         | 3.1 %         |
| 9Be (KED)  | 0.015 ppb             | 2 cps             | 86.6 %        |
| 11B (KED)  | 10.222 ppb            | 1,453 cps         | 10.2 %        |
| 24Mg (KED) | 166.269 ppb           | 104,370 cps       | 0.9 %         |
| 27Al (KED) | 167.268 ppb           | 24,360 cps        | 1.7 %         |

| Category    | Concentration average | Intensity average | Intensity RSD |
|-------------|-----------------------|-------------------|---------------|
| 45Sc (KED)  | 100.422 %             | 52,317 cps        | 1.6 %         |
| 51V (KED)   | 0.354 ppb             | 3,284 cps         | 2.7 %         |
| 52Cr (KED)  | 1.173 ppb             | 17,048 cps        | 1.4 %         |
| 55Mn (KED)  | 4.818 ppb             | 35,018 cps        | 2.0 %         |
| 56Fe (KED)  | 205.539 ppb           | 2,715,999 cps     | 0.8 %         |
| 58Ni (KED)  | 0.992 ppb             | 17,141 cps        | 2.7 %         |
| 59Co (KED)  | 0.106 ppb             | 3,018 cps         | 4.8 %         |
| 63Cu (KED)  | 3.284 ppb             | 69,744 cps        | 1.4 %         |
| 64Zn (KED)  | 56.364 ppb            | 256,624 cps       | 2.5 %         |
| 69Ga (KED)  | 0.845 ppb             | 5,933 cps         | 4.7 %         |
| 75As (KED)  | 0.141 ppb             | 210 cps           | 13.6 %        |
| 80Se (KED)  | 0.012 ppb             | 1,188 cps         | 3.6 %         |
| 85Rb (KED)  | 0.667 ppb             | 4,346 cps         | 1.2 %         |
| 88Sr (KED)  | 3.171 ppb             | 29,224 cps        | 2.1 %         |
| 89Y (KED)   | 100.781 %             | 484,798 cps       | 1.0 %         |
| 107Ag (KED) | 0.019 ppb             | 1,113 cps         | 5.3 %         |
| 114Cd (KED) | 0.017 ppb             | 321 cps           | 4.9 %         |
| 115In (KED) | 98.540 %              | 839,574 cps       | 1.1 %         |
| 133Cs (KED) | 0.026 ppb             | 794 cps           | 8.2 %         |
| 138Ba (KED) | 2.928 ppb             | 127,178 cps       | 0.3 %         |
| 139La (KED) | 0.227 ppb             | 21,013 cps        | 1.2 %         |
| 140Ce (KED) | 0.483 ppb             | 60,003 cps        | 1.0 %         |
| 141Pr (KED) | 0.052 ppb             | 6,712 cps         | 0.7 %         |
| 142Nd (KED) | 0.286 ppb             | 14,834 cps        | 4.3 %         |
| 152Sm (KED) | 0.036 ppb             | 1,709 cps         | 2.5 %         |
| 153Eu (KED) | 0.007 ppb             | 657 cps           | 7.5 %         |
| 158Gd (KED) | 0.030 ppb             | 1,930 cps         | 5.5 %         |
| 159Tb (KED) | 100.190 %             | 4,747,672 cps     | 4.1 %         |
| 164Dy (KED) | 0.019 ppb             | 1,395 cps         | 3.5 %         |
| 166Er (KED) | 0.010 ppb             | 1,295 cps         | 10.5 %        |
| 169Tm (KED) | 0.001 ppb             | 394 cps           | 18.7 %        |
| 174Yb (KED) | 0.008 ppb             | 772 cps           | 5.1 %         |
| 175Lu (KED) | -0.074 ppb            | 23,202 cps        | 0.8 %         |
| 205Tl (KED) | 0.003 ppb             | 692 cps           | 5.7 %         |
| 208Pb (KED) | 0.349 ppb             | 52,178 cps        | 1.3 %         |
| 209Bi (KED) | 98.264 %              | 3,499,896 cps     | 1.7 %         |
| 232Th (KED) | 0.053 ppb             | 14,607 cps        | 2.3 %         |
| 238U (KED)  | 0.012 ppb             | 3,781 cps         | 2.0 %         |

## Sample Summary

Instrument ID: iCAP Q

Analysis index: 10

Analysis name: 03001ti

Analysis started at: 10/28/2021 3:23:25 PM

User name: WINDOWS-UPCI4ER\Administrator

| Category    | Concentration average | Concentration RSD |
|-------------|-----------------------|-------------------|
| 6Li (KED)   | 107.294 %             | 0.5 %             |
| 9Be (KED)   | 0.015 ppb             | 86.6 %            |
| 11B (KED)   | -1.283 ppb            | 87.8 %            |
| 24Mg (KED)  | 199.470 ppb           | 1.3 %             |
| 27Al (KED)  | 244.915 ppb           | 1.5 %             |
| 45Sc (KED)  | 104.851 %             | 1.9 %             |
| 51V (KED)   | 0.458 ppb             | 2.0 %             |
| 52Cr (KED)  | 1.114 ppb             | 1.0 %             |
| 55Mn (KED)  | 5.413 ppb             | 1.5 %             |
| 56Fe (KED)  | 272.519 ppb           | 2.9 %             |
| 58Ni (KED)  | 1.250 ppb             | 2.4 %             |
| 59Co (KED)  | 0.120 ppb             | 2.3 %             |
| 63Cu (KED)  | 2.768 ppb             | 1.4 %             |
| 64Zn (KED)  | 55.166 ppb            | 1.7 %             |
| 69Ga (KED)  | 1.045 ppb             | 0.6 %             |
| 75As (KED)  | 0.192 ppb             | 4.5 %             |
| 80Se (KED)  | 0.111 ppb             | 113.6 %           |
| 85Rb (KED)  | 0.685 ppb             | 2.7 %             |
| 88Sr (KED)  | 3.447 ppb             | 1.5 %             |
| 89Y (KED)   | 102.975 %             | 1.4 %             |
| 107Ag (KED) | 0.013 ppb             | 14.3 %            |
| 114Cd (KED) | 0.014 ppb             | 6.7 %             |
| 115In (KED) | 101.124 %             | 1.4 %             |
| 133Cs (KED) | 0.034 ppb             | 2.4 %             |
| 138Ba (KED) | 3.683 ppb             | 2.2 %             |
| 139La (KED) | 0.330 ppb             | 1.3 %             |
| 140Ce (KED) | 0.711 ppb             | 2.5 %             |
| 141Pr (KED) | 0.081 ppb             | 0.4 %             |
| 142Nd (KED) | 0.434 ppb             | 4.0 %             |
| 152Sm (KED) | 0.055 ppb             | 2.8 %             |
| 153Eu (KED) | 0.009 ppb             | 9.8 %             |
| 158Gd (KED) | 0.045 ppb             | 4.3 %             |
| 159Tb (KED) | 104.617 %             | 1.2 %             |
| 164Dy (KED) | 0.028 ppb             | 2.5 %             |
| 166Er (KED) | 0.013 ppb             | 1.0 %             |
| 169Tm (KED) | 0.002 ppb             | 5.8 %             |
| 174Yb (KED) | 0.010 ppb             | 4.3 %             |
| 175Lu (KED) | -0.089 ppb            | 3.0 %             |
| 205Tl (KED) | 0.004 ppb             | 3.7 %             |
| 208Pb (KED) | 0.312 ppb             | 1.2 %             |
| 209Bi (KED) | 98.910 %              | 0.3 %             |
| 232Th (KED) | 0.104 ppb             | 1.6 %             |
| 238U (KED)  | 0.015 ppb             | 3.9 %             |

| Category   | Concentration average | Intensity average | Intensity RSD |
|------------|-----------------------|-------------------|---------------|
| 6Li (KED)  | 107.294 %             | 3,286 cps         | 0.5 %         |
| 9Be (KED)  | 0.015 ppb             | 2 cps             | 86.6 %        |
| 11B (KED)  | -1.283 ppb            | 481 cps           | 20.1 %        |
| 24Mg (KED) | 199.470 ppb           | 124,384 cps       | 1.0 %         |
| 27Al (KED) | 244.915 ppb           | 37,203 cps        | 2.4 %         |

| Category    | Concentration average | Intensity average | Intensity RSD |
|-------------|-----------------------|-------------------|---------------|
| 45Sc (KED)  | 104.851 %             | 54,625 cps        | 1.9 %         |
| 51V (KED)   | 0.458 ppb             | 4,432 cps         | 3.7 %         |
| 52Cr (KED)  | 1.114 ppb             | 16,908 cps        | 1.0 %         |
| 55Mn (KED)  | 5.413 ppb             | 41,065 cps        | 1.8 %         |
| 56Fe (KED)  | 272.519 ppb           | 3,758,407 cps     | 1.7 %         |
| 58Ni (KED)  | 1.250 ppb             | 22,465 cps        | 0.6 %         |
| 59Co (KED)  | 0.120 ppb             | 3,575 cps         | 3.2 %         |
| 63Cu (KED)  | 2.768 ppb             | 60,388 cps        | 1.4 %         |
| 64Zn (KED)  | 55.166 ppb            | 256,632 cps       | 0.3 %         |
| 69Ga (KED)  | 1.045 ppb             | 7,481 cps         | 0.8 %         |
| 75As (KED)  | 0.192 ppb             | 288 cps           | 3.7 %         |
| 80Se (KED)  | 0.111 ppb             | 1,256 cps         | 3.1 %         |
| 85Rb (KED)  | 0.685 ppb             | 4,563 cps         | 3.4 %         |
| 88Sr (KED)  | 3.447 ppb             | 32,449 cps        | 0.3 %         |
| 89Y (KED)   | 102.975 %             | 495,352 cps       | 1.4 %         |
| 107Ag (KED) | 0.013 ppb             | 804 cps           | 12.5 %        |
| 114Cd (KED) | 0.014 ppb             | 269 cps           | 5.2 %         |
| 115In (KED) | 101.124 %             | 861,587 cps       | 1.4 %         |
| 133Cs (KED) | 0.034 ppb             | 1,080 cps         | 3.5 %         |
| 138Ba (KED) | 3.683 ppb             | 167,055 cps       | 1.5 %         |
| 139La (KED) | 0.330 ppb             | 31,999 cps        | 0.3 %         |
| 140Ce (KED) | 0.711 ppb             | 92,342 cps        | 1.4 %         |
| 141Pr (KED) | 0.081 ppb             | 10,960 cps        | 1.5 %         |
| 142Nd (KED) | 0.434 ppb             | 23,551 cps        | 2.8 %         |
| 152Sm (KED) | 0.055 ppb             | 2,700 cps         | 1.7 %         |
| 153Eu (KED) | 0.009 ppb             | 892 cps           | 8.6 %         |
| 158Gd (KED) | 0.045 ppb             | 3,031 cps         | 3.2 %         |
| 159Tb (KED) | 104.617 %             | 4,957,447 cps     | 1.2 %         |
| 164Dy (KED) | 0.028 ppb             | 2,150 cps         | 3.6 %         |
| 166Er (KED) | 0.013 ppb             | 1,597 cps         | 0.6 %         |
| 169Tm (KED) | 0.002 ppb             | 549 cps           | 4.6 %         |
| 174Yb (KED) | 0.010 ppb             | 1,102 cps         | 4.3 %         |
| 175Lu (KED) | -0.089 ppb            | 21,637 cps        | 1.6 %         |
| 205Tl (KED) | 0.004 ppb             | 766 cps           | 3.3 %         |
| 208Pb (KED) | 0.312 ppb             | 47,364 cps        | 0.9 %         |
| 209Bi (KED) | 98.910 %              | 3,522,884 cps     | 0.3 %         |
| 232Th (KED) | 0.104 ppb             | 28,578 cps        | 1.4 %         |
| 238U (KED)  | 0.015 ppb             | 4,814 cps         | 3.9 %         |

## Sample Summary

Instrument ID: iCAP Q

Analysis index: 11

Analysis name: 03042ti

Analysis started at: 10/28/2021 3:26:35 PM

User name: WINDOWS-UPCI4ER\Administrator

| Category    | Concentration average | Concentration RSD |
|-------------|-----------------------|-------------------|
| 6Li (KED)   | 104.064 %             | 4.5 %             |
| 9Be (KED)   | 0.015 ppb             | 86.8 %            |
| 11B (KED)   | 21.455 ppb            | 7.5 %             |
| 24Mg (KED)  | 515.801 ppb           | 4.3 %             |
| 27Al (KED)  | 606.879 ppb           | 2.0 %             |
| 45Sc (KED)  | 102.819 %             | 1.9 %             |
| 51V (KED)   | 1.210 ppb             | 5.1 %             |
| 52Cr (KED)  | 1.990 ppb             | 2.9 %             |
| 55Mn (KED)  | 15.134 ppb            | 2.2 %             |
| 56Fe (KED)  | 776.573 ppb           | 3.1 %             |
| 58Ni (KED)  | 7.322 ppb             | 0.9 %             |
| 59Co (KED)  | 0.336 ppb             | 2.7 %             |
| 63Cu (KED)  | 3.196 ppb             | 0.7 %             |
| 64Zn (KED)  | 55.907 ppb            | 0.4 %             |
| 69Ga (KED)  | 2.341 ppb             | 2.2 %             |
| 75As (KED)  | 0.321 ppb             | 15.0 %            |
| 80Se (KED)  | -0.128 ppb            | 128.7 %           |
| 85Rb (KED)  | 1.295 ppb             | 3.6 %             |
| 88Sr (KED)  | 9.451 ppb             | 1.2 %             |
| 89Y (KED)   | 102.540 %             | 1.1 %             |
| 107Ag (KED) | 0.018 ppb             | 2.9 %             |
| 114Cd (KED) | 0.021 ppb             | 8.8 %             |
| 115In (KED) | 99.311 %              | 1.6 %             |
| 133Cs (KED) | 0.085 ppb             | 7.0 %             |
| 138Ba (KED) | 8.121 ppb             | 0.7 %             |
| 139La (KED) | 0.823 ppb             | 2.2 %             |
| 140Ce (KED) | 1.690 ppb             | 2.0 %             |
| 141Pr (KED) | 0.196 ppb             | 1.9 %             |
| 142Nd (KED) | 1.069 ppb             | 0.5 %             |
| 152Sm (KED) | 0.130 ppb             | 3.3 %             |
| 153Eu (KED) | 0.025 ppb             | 3.4 %             |
| 158Gd (KED) | 0.112 ppb             | 2.4 %             |
| 159Tb (KED) | 103.573 %             | 0.7 %             |
| 164Dy (KED) | 0.076 ppb             | 1.2 %             |
| 166Er (KED) | 0.036 ppb             | 2.5 %             |
| 169Tm (KED) | 0.005 ppb             | 2.1 %             |
| 174Yb (KED) | 0.030 ppb             | 3.2 %             |
| 175Lu (KED) | -0.086 ppb            | 1.6 %             |
| 205Tl (KED) | 0.007 ppb             | 2.1 %             |
| 208Pb (KED) | 0.578 ppb             | 3.1 %             |
| 209Bi (KED) | 97.970 %              | 0.7 %             |
| 232Th (KED) | 0.187 ppb             | 1.9 %             |
| 238U (KED)  | 0.036 ppb             | 3.6 %             |

| Category   | Concentration average | Intensity average | Intensity RSD |
|------------|-----------------------|-------------------|---------------|
| 6Li (KED)  | 104.064 %             | 3,187 cps         | 4.5 %         |
| 9Be (KED)  | 0.015 ppb             | 2 cps             | 86.6 %        |
| 11B (KED)  | 21.455 ppb            | 2,308 cps         | 3.2 %         |
| 24Mg (KED) | 515.801 ppb           | 311,346 cps       | 0.5 %         |
| 27Al (KED) | 606.879 ppb           | 90,259 cps        | 0.3 %         |

| Category    | Concentration average | Intensity average | Intensity RSD |
|-------------|-----------------------|-------------------|---------------|
| 45Sc (KED)  | 102.819 %             | 53,566 cps        | 1.9 %         |
| 51V (KED)   | 1.210 ppb             | 11,481 cps        | 3.3 %         |
| 52Cr (KED)  | 1.990 ppb             | 29,583 cps        | 1.4 %         |
| 55Mn (KED)  | 15.134 ppb            | 112,488 cps       | 0.4 %         |
| 56Fe (KED)  | 776.573 ppb           | 10,497,860 cps    | 1.4 %         |
| 58Ni (KED)  | 7.322 ppb             | 127,640 cps       | 1.1 %         |
| 59Co (KED)  | 0.336 ppb             | 9,769 cps         | 2.7 %         |
| 63Cu (KED)  | 3.196 ppb             | 69,124 cps        | 0.7 %         |
| 64Zn (KED)  | 55.907 ppb            | 258,991 cps       | 1.1 %         |
| 69Ga (KED)  | 2.341 ppb             | 16,642 cps        | 1.2 %         |
| 75As (KED)  | 0.321 ppb             | 473 cps           | 15.6 %        |
| 80Se (KED)  | -0.128 ppb            | 1,149 cps         | 7.2 %         |
| 85Rb (KED)  | 1.295 ppb             | 8,574 cps         | 2.7 %         |
| 88Sr (KED)  | 9.451 ppb             | 88,452 cps        | 0.0 %         |
| 89Y (KED)   | 102.540 %             | 493,259 cps       | 1.1 %         |
| 107Ag (KED) | 0.018 ppb             | 1,080 cps         | 3.8 %         |
| 114Cd (KED) | 0.021 ppb             | 387 cps           | 9.9 %         |
| 115In (KED) | 99.311 %              | 846,144 cps       | 1.6 %         |
| 133Cs (KED) | 0.085 ppb             | 2,597 cps         | 5.3 %         |
| 138Ba (KED) | 8.121 ppb             | 363,914 cps       | 0.4 %         |
| 139La (KED) | 0.823 ppb             | 78,954 cps        | 1.5 %         |
| 140Ce (KED) | 1.690 ppb             | 217,216 cps       | 1.3 %         |
| 141Pr (KED) | 0.196 ppb             | 26,226 cps        | 1.3 %         |
| 142Nd (KED) | 1.069 ppb             | 57,365 cps        | 0.8 %         |
| 152Sm (KED) | 0.130 ppb             | 6,381 cps         | 3.7 %         |
| 153Eu (KED) | 0.025 ppb             | 2,526 cps         | 2.9 %         |
| 158Gd (KED) | 0.112 ppb             | 7,422 cps         | 1.7 %         |
| 159Tb (KED) | 103.573 %             | 4,907,988 cps     | 0.7 %         |
| 164Dy (KED) | 0.076 ppb             | 5,655 cps         | 1.1 %         |
| 166Er (KED) | 0.036 ppb             | 3,657 cps         | 2.9 %         |
| 169Tm (KED) | 0.005 ppb             | 1,397 cps         | 1.6 %         |
| 174Yb (KED) | 0.030 ppb             | 3,169 cps         | 2.7 %         |
| 175Lu (KED) | -0.086 ppb            | 22,003 cps        | 1.2 %         |
| 205Tl (KED) | 0.007 ppb             | 1,383 cps         | 1.5 %         |
| 208Pb (KED) | 0.578 ppb             | 83,485 cps        | 2.5 %         |
| 209Bi (KED) | 97.970 %              | 3,489,419 cps     | 0.7 %         |
| 232Th (KED) | 0.187 ppb             | 50,887 cps        | 1.2 %         |
| 238U (KED)  | 0.036 ppb             | 11,711 cps        | 3.0 %         |

## Sample Summary

Instrument ID: iCAP Q

Analysis index: 12

Analysis name: 80060jian

Analysis started at: 10/28/2021 3:29:45 PM

User name: WINDOWS-UPCI4ER\Administrator

| Category    | Concentration average | Concentration RSD |
|-------------|-----------------------|-------------------|
| 6Li (KED)   | 107.475 %             | 3.7 %             |
| 9Be (KED)   | 0.007 ppb             | 173.2 %           |
| 11B (KED)   | 3.137 ppb             | 17.2 %            |
| 24Mg (KED)  | 103.837 ppb           | 3.2 %             |
| 27Al (KED)  | 135.836 ppb           | 1.0 %             |
| 45Sc (KED)  | 102.061 %             | 1.4 %             |
| 51V (KED)   | 0.257 ppb             | 3.1 %             |
| 52Cr (KED)  | 0.924 ppb             | 1.2 %             |
| 55Mn (KED)  | 4.200 ppb             | 1.5 %             |
| 56Fe (KED)  | 146.318 ppb           | 1.1 %             |
| 58Ni (KED)  | 0.841 ppb             | 1.9 %             |
| 59Co (KED)  | 0.071 ppb             | 5.6 %             |
| 63Cu (KED)  | 2.057 ppb             | 0.7 %             |
| 64Zn (KED)  | 59.164 ppb            | 1.5 %             |
| 69Ga (KED)  | 0.552 ppb             | 5.3 %             |
| 75As (KED)  | 0.102 ppb             | 10.9 %            |
| 80Se (KED)  | 0.008 ppb             | 577.9 %           |
| 85Rb (KED)  | 0.843 ppb             | 2.6 %             |
| 88Sr (KED)  | 1.351 ppb             | 0.7 %             |
| 89Y (KED)   | 99.922 %              | 1.9 %             |
| 107Ag (KED) | 0.026 ppb             | 7.2 %             |
| 114Cd (KED) | 0.019 ppb             | 6.6 %             |
| 115In (KED) | 99.210 %              | 1.1 %             |
| 133Cs (KED) | 0.026 ppb             | 8.6 %             |
| 138Ba (KED) | 1.828 ppb             | 1.7 %             |
| 139La (KED) | 0.124 ppb             | 2.1 %             |
| 140Ce (KED) | 0.280 ppb             | 2.0 %             |
| 141Pr (KED) | 0.031 ppb             | 0.8 %             |
| 142Nd (KED) | 0.167 ppb             | 2.8 %             |
| 152Sm (KED) | 0.024 ppb             | 6.0 %             |
| 153Eu (KED) | 0.005 ppb             | 8.6 %             |
| 158Gd (KED) | 0.019 ppb             | 1.0 %             |
| 159Tb (KED) | 102.614 %             | 0.7 %             |
| 164Dy (KED) | 0.013 ppb             | 9.0 %             |
| 166Er (KED) | 0.006 ppb             | 4.6 %             |
| 169Tm (KED) | 0.001 ppb             | 14.3 %            |
| 174Yb (KED) | 0.005 ppb             | 5.1 %             |
| 175Lu (KED) | -0.091 ppb            | 0.8 %             |
| 205Tl (KED) | 0.004 ppb             | 7.3 %             |
| 208Pb (KED) | 0.294 ppb             | 1.3 %             |
| 209Bi (KED) | 97.710 %              | 1.1 %             |
| 232Th (KED) | 0.039 ppb             | 0.4 %             |
| 238U (KED)  | 0.009 ppb             | 6.0 %             |

| Category   | Concentration average | Intensity average | Intensity RSD |
|------------|-----------------------|-------------------|---------------|
| 6Li (KED)  | 107.475 %             | 3,292 cps         | 3.7 %         |
| 9Be (KED)  | 0.007 ppb             | 1 cps             | 173.2 %       |
| 11B (KED)  | 3.137 ppb             | 851 cps           | 3.4 %         |
| 24Mg (KED) | 103.837 ppb           | 64,884 cps        | 1.1 %         |
| 27Al (KED) | 135.836 ppb           | 20,121 cps        | 1.8 %         |

| Category    | Concentration average | Intensity average | Intensity RSD |
|-------------|-----------------------|-------------------|---------------|
| 45Sc (KED)  | 102.061 %             | 53,171 cps        | 1.4 %         |
| 51V (KED)   | 0.257 ppb             | 2,420 cps         | 2.2 %         |
| 52Cr (KED)  | 0.924 ppb             | 13,660 cps        | 0.8 %         |
| 55Mn (KED)  | 4.200 ppb             | 31,026 cps        | 0.6 %         |
| 56Fe (KED)  | 146.318 ppb           | 1,965,621 cps     | 1.0 %         |
| 58Ni (KED)  | 0.841 ppb             | 14,804 cps        | 1.3 %         |
| 59Co (KED)  | 0.071 ppb             | 2,066 cps         | 5.9 %         |
| 63Cu (KED)  | 2.057 ppb             | 44,069 cps        | 1.2 %         |
| 64Zn (KED)  | 59.164 ppb            | 266,923 cps       | 1.0 %         |
| 69Ga (KED)  | 0.552 ppb             | 3,848 cps         | 3.8 %         |
| 75As (KED)  | 0.102 ppb             | 154 cps           | 10.9 %        |
| 80Se (KED)  | 0.008 ppb             | 1,176 cps         | 1.7 %         |
| 85Rb (KED)  | 0.843 ppb             | 5,446 cps         | 1.4 %         |
| 88Sr (KED)  | 1.351 ppb             | 12,394 cps        | 2.2 %         |
| 89Y (KED)   | 99.922 %              | 480,664 cps       | 1.9 %         |
| 107Ag (KED) | 0.026 ppb             | 1,516 cps         | 8.3 %         |
| 114Cd (KED) | 0.019 ppb             | 366 cps           | 6.5 %         |
| 115In (KED) | 99.210 %              | 845,282 cps       | 1.1 %         |
| 133Cs (KED) | 0.026 ppb             | 796 cps           | 8.0 %         |
| 138Ba (KED) | 1.828 ppb             | 81,689 cps        | 1.4 %         |
| 139La (KED) | 0.124 ppb             | 11,827 cps        | 1.8 %         |
| 140Ce (KED) | 0.280 ppb             | 35,738 cps        | 2.0 %         |
| 141Pr (KED) | 0.031 ppb             | 4,116 cps         | 1.1 %         |
| 142Nd (KED) | 0.167 ppb             | 8,909 cps         | 3.1 %         |
| 152Sm (KED) | 0.024 ppb             | 1,167 cps         | 6.4 %         |
| 153Eu (KED) | 0.005 ppb             | 450 cps           | 9.1 %         |
| 158Gd (KED) | 0.019 ppb             | 1,262 cps         | 1.5 %         |
| 159Tb (KED) | 102.614 %             | 4,862,543 cps     | 0.7 %         |
| 164Dy (KED) | 0.013 ppb             | 1,006 cps         | 9.4 %         |
| 166Er (KED) | 0.006 ppb             | 980 cps           | 2.7 %         |
| 169Tm (KED) | 0.001 ppb             | 227 cps           | 14.2 %        |
| 174Yb (KED) | 0.005 ppb             | 543 cps           | 4.3 %         |
| 175Lu (KED) | -0.091 ppb            | 20,882 cps        | 0.3 %         |
| 205Tl (KED) | 0.004 ppb             | 788 cps           | 6.4 %         |
| 208Pb (KED) | 0.294 ppb             | 44,265 cps        | 0.8 %         |
| 209Bi (KED) | 97.710 %              | 3,480,162 cps     | 1.1 %         |
| 232Th (KED) | 0.039 ppb             | 10,567 cps        | 0.7 %         |
| 238U (KED)  | 0.009 ppb             | 3,105 cps         | 6.7 %         |

## Sample Summary

Instrument ID: iCAP Q

Analysis index: 13

Analysis name: 80176jian

Analysis started at: 10/28/2021 3:32:56 PM

User name: WINDOWS-UPCI4ER\Administrator

| Category    | Concentration average | Concentration RSD |
|-------------|-----------------------|-------------------|
| 6Li (KED)   | 106.387 %             | 1.8 %             |
| 9Be (KED)   | 0.000 ppb             |                   |
| 11B (KED)   | 1.314 ppb             | 80.1 %            |
| 24Mg (KED)  | 89.241 ppb            | 1.9 %             |
| 27Al (KED)  | 128.236 ppb           | 1.2 %             |
| 45Sc (KED)  | 104.091 %             | 0.7 %             |
| 51V (KED)   | 0.259 ppb             | 2.0 %             |
| 52Cr (KED)  | 1.152 ppb             | 2.7 %             |
| 55Mn (KED)  | 4.703 ppb             | 2.8 %             |
| 56Fe (KED)  | 145.903 ppb           | 1.1 %             |
| 58Ni (KED)  | 0.856 ppb             | 1.2 %             |
| 59Co (KED)  | 0.073 ppb             | 1.7 %             |
| 63Cu (KED)  | 2.123 ppb             | 0.9 %             |
| 64Zn (KED)  | 53.203 ppb            | 1.5 %             |
| 69Ga (KED)  | 0.495 ppb             | 2.5 %             |
| 75As (KED)  | 0.118 ppb             | 20.3 %            |
| 80Se (KED)  | 0.016 ppb             | 1,287.2 %         |
| 85Rb (KED)  | 0.751 ppb             | 2.3 %             |
| 88Sr (KED)  | 1.129 ppb             | 1.9 %             |
| 89Y (KED)   | 104.170 %             | 0.8 %             |
| 107Ag (KED) | 0.017 ppb             | 6.9 %             |
| 114Cd (KED) | 0.019 ppb             | 5.0 %             |
| 115In (KED) | 102.111 %             | 1.1 %             |
| 133Cs (KED) | 0.026 ppb             | 5.4 %             |
| 138Ba (KED) | 1.708 ppb             | 2.1 %             |
| 139La (KED) | 0.135 ppb             | 3.0 %             |
| 140Ce (KED) | 0.290 ppb             | 1.6 %             |
| 141Pr (KED) | 0.032 ppb             | 3.5 %             |
| 142Nd (KED) | 0.174 ppb             | 0.8 %             |
| 152Sm (KED) | 0.024 ppb             | 1.8 %             |
| 153Eu (KED) | 0.004 ppb             | 0.8 %             |
| 158Gd (KED) | 0.019 ppb             | 7.6 %             |
| 159Tb (KED) | 105.525 %             | 1.5 %             |
| 164Dy (KED) | 0.013 ppb             | 5.5 %             |
| 166Er (KED) | 0.005 ppb             | 8.8 %             |
| 169Tm (KED) | 0.001 ppb             | 18.7 %            |
| 174Yb (KED) | 0.006 ppb             | 11.7 %            |
| 175Lu (KED) | -0.096 ppb            | 2.2 %             |
| 205Tl (KED) | 0.004 ppb             | 3.6 %             |
| 208Pb (KED) | 0.305 ppb             | 5.0 %             |
| 209Bi (KED) | 99.229 %              | 0.1 %             |
| 232Th (KED) | 0.037 ppb             | 0.3 %             |
| 238U (KED)  | 0.009 ppb             | 3.2 %             |

| Category   | Concentration average | Intensity average | Intensity RSD |
|------------|-----------------------|-------------------|---------------|
| 6Li (KED)  | 106.387 %             | 3,258 cps         | 1.8 %         |
| 9Be (KED)  | 0.000 ppb             | 0 cps             |               |
| 11B (KED)  | 1.314 ppb             | 692 cps           | 12.9 %        |
| 24Mg (KED) | 89.241 ppb            | 55,250 cps        | 1.3 %         |
| 27Al (KED) | 128.236 ppb           | 19,376 cps        | 0.6 %         |

| Category    | Concentration average | Intensity average | Intensity RSD |
|-------------|-----------------------|-------------------|---------------|
| 45Sc (KED)  | 104.091 %             | 54,229 cps        | 0.7 %         |
| 51V (KED)   | 0.259 ppb             | 2,492 cps         | 2.7 %         |
| 52Cr (KED)  | 1.152 ppb             | 17,361 cps        | 2.0 %         |
| 55Mn (KED)  | 4.703 ppb             | 35,427 cps        | 2.1 %         |
| 56Fe (KED)  | 145.903 ppb           | 1,999,107 cps     | 0.7 %         |
| 58Ni (KED)  | 0.856 ppb             | 15,367 cps        | 1.9 %         |
| 59Co (KED)  | 0.073 ppb             | 2,178 cps         | 1.8 %         |
| 63Cu (KED)  | 2.123 ppb             | 47,342 cps        | 0.6 %         |
| 64Zn (KED)  | 53.203 ppb            | 250,470 cps       | 0.8 %         |
| 69Ga (KED)  | 0.495 ppb             | 3,604 cps         | 2.3 %         |
| 75As (KED)  | 0.118 ppb             | 183 cps           | 19.7 %        |
| 80Se (KED)  | 0.016 ppb             | 1,229 cps         | 6.7 %         |
| 85Rb (KED)  | 0.751 ppb             | 5,060 cps         | 1.8 %         |
| 88Sr (KED)  | 1.129 ppb             | 10,810 cps        | 1.1 %         |
| 89Y (KED)   | 104.170 %             | 501,102 cps       | 0.8 %         |
| 107Ag (KED) | 0.017 ppb             | 1,043 cps         | 6.8 %         |
| 114Cd (KED) | 0.019 ppb             | 371 cps           | 5.8 %         |
| 115In (KED) | 102.111 %             | 869,995 cps       | 1.1 %         |
| 133Cs (KED) | 0.026 ppb             | 832 cps           | 6.2 %         |
| 138Ba (KED) | 1.708 ppb             | 78,498 cps        | 1.2 %         |
| 139La (KED) | 0.135 ppb             | 13,219 cps        | 1.6 %         |
| 140Ce (KED) | 0.290 ppb             | 38,070 cps        | 1.4 %         |
| 141Pr (KED) | 0.032 ppb             | 4,329 cps         | 2.5 %         |
| 142Nd (KED) | 0.174 ppb             | 9,549 cps         | 1.7 %         |
| 152Sm (KED) | 0.024 ppb             | 1,188 cps         | 3.2 %         |
| 153Eu (KED) | 0.004 ppb             | 459 cps           | 1.1 %         |
| 158Gd (KED) | 0.019 ppb             | 1,305 cps         | 6.6 %         |
| 159Tb (KED) | 105.525 %             | 5,000,446 cps     | 1.5 %         |
| 164Dy (KED) | 0.013 ppb             | 1,018 cps         | 4.1 %         |
| 166Er (KED) | 0.005 ppb             | 903 cps           | 4.1 %         |
| 169Tm (KED) | 0.001 ppb             | 234 cps           | 19.2 %        |
| 174Yb (KED) | 0.006 ppb             | 623 cps           | 10.3 %        |
| 175Lu (KED) | -0.096 ppb            | 20,539 cps        | 1.5 %         |
| 205Tl (KED) | 0.004 ppb             | 768 cps           | 3.3 %         |
| 208Pb (KED) | 0.305 ppb             | 46,507 cps        | 4.5 %         |
| 209Bi (KED) | 99.229 %              | 3,534,265 cps     | 0.1 %         |
| 232Th (KED) | 0.037 ppb             | 10,193 cps        | 0.3 %         |
| 238U (KED)  | 0.009 ppb             | 3,102 cps         | 3.0 %         |

## Sample Summary

Instrument ID: iCAP Q

Analysis index: 14

Analysis name: 80066ti

Analysis started at: 10/28/2021 3:36:11 PM

User name: WINDOWS-UPCI4ER\Administrator

| Category    | Concentration average | Concentration RSD |
|-------------|-----------------------|-------------------|
| 6Li (KED)   | 107.984 %             | 0.7 %             |
| 9Be (KED)   | 0.007 ppb             | 173.2 %           |
| 11B (KED)   | 4.347 ppb             | 32.6 %            |
| 24Mg (KED)  | 111.167 ppb           | 1.0 %             |
| 27Al (KED)  | 175.080 ppb           | 2.0 %             |
| 45Sc (KED)  | 103.438 %             | 1.5 %             |
| 51V (KED)   | 0.353 ppb             | 2.0 %             |
| 52Cr (KED)  | 0.868 ppb             | 1.9 %             |
| 55Mn (KED)  | 5.916 ppb             | 1.4 %             |
| 56Fe (KED)  | 196.035 ppb           | 1.0 %             |
| 58Ni (KED)  | 1.082 ppb             | 2.6 %             |
| 59Co (KED)  | 0.100 ppb             | 5.5 %             |
| 63Cu (KED)  | 2.098 ppb             | 0.3 %             |
| 64Zn (KED)  | 52.119 ppb            | 0.8 %             |
| 69Ga (KED)  | 0.674 ppb             | 1.1 %             |
| 75As (KED)  | 0.136 ppb             | 14.1 %            |
| 80Se (KED)  | -0.059 ppb            | 290.9 %           |
| 85Rb (KED)  | 0.856 ppb             | 0.2 %             |
| 88Sr (KED)  | 1.704 ppb             | 1.3 %             |
| 89Y (KED)   | 101.547 %             | 0.3 %             |
| 107Ag (KED) | 0.021 ppb             | 4.9 %             |
| 114Cd (KED) | 0.022 ppb             | 11.1 %            |
| 115In (KED) | 99.988 %              | 1.3 %             |
| 133Cs (KED) | 0.036 ppb             | 1.8 %             |
| 138Ba (KED) | 2.226 ppb             | 2.5 %             |
| 139La (KED) | 0.169 ppb             | 1.1 %             |
| 140Ce (KED) | 0.380 ppb             | 1.5 %             |
| 141Pr (KED) | 0.040 ppb             | 0.4 %             |
| 142Nd (KED) | 0.231 ppb             | 4.2 %             |
| 152Sm (KED) | 0.029 ppb             | 5.8 %             |
| 153Eu (KED) | 0.006 ppb             | 5.1 %             |
| 158Gd (KED) | 0.028 ppb             | 8.2 %             |
| 159Tb (KED) | 104.697 %             | 2.0 %             |
| 164Dy (KED) | 0.019 ppb             | 7.2 %             |
| 166Er (KED) | 0.009 ppb             | 8.7 %             |
| 169Tm (KED) | 0.001 ppb             | 10.7 %            |
| 174Yb (KED) | 0.007 ppb             | 12.3 %            |
| 175Lu (KED) | -0.101 ppb            | 0.5 %             |
| 205Tl (KED) | 0.004 ppb             | 7.9 %             |
| 208Pb (KED) | 0.319 ppb             | 1.0 %             |
| 209Bi (KED) | 97.439 %              | 0.7 %             |
| 232Th (KED) | 0.048 ppb             | 1.3 %             |
| 238U (KED)  | 0.012 ppb             | 3.3 %             |

| Category   | Concentration average | Intensity average | Intensity RSD |
|------------|-----------------------|-------------------|---------------|
| 6Li (KED)  | 107.984 %             | 3,307 cps         | 0.7 %         |
| 9Be (KED)  | 0.007 ppb             | 1 cps             | 173.2 %       |
| 11B (KED)  | 4.347 ppb             | 958 cps           | 12.3 %        |
| 24Mg (KED) | 111.167 ppb           | 69,836 cps        | 1.5 %         |
| 27Al (KED) | 175.080 ppb           | 26,255 cps        | 1.0 %         |

| Category    | Concentration average | Intensity average | Intensity RSD |
|-------------|-----------------------|-------------------|---------------|
| 45Sc (KED)  | 103.438 %             | 53,888 cps        | 1.5 %         |
| 51V (KED)   | 0.353 ppb             | 3,370 cps         | 1.0 %         |
| 52Cr (KED)  | 0.868 ppb             | 13,005 cps        | 1.4 %         |
| 55Mn (KED)  | 5.916 ppb             | 44,274 cps        | 0.9 %         |
| 56Fe (KED)  | 196.035 ppb           | 2,668,289 cps     | 0.6 %         |
| 58Ni (KED)  | 1.082 ppb             | 19,226 cps        | 2.2 %         |
| 59Co (KED)  | 0.100 ppb             | 2,929 cps         | 6.1 %         |
| 63Cu (KED)  | 2.098 ppb             | 45,640 cps        | 0.2 %         |
| 64Zn (KED)  | 52.119 ppb            | 239,247 cps       | 0.7 %         |
| 69Ga (KED)  | 0.674 ppb             | 4,774 cps         | 1.1 %         |
| 75As (KED)  | 0.136 ppb             | 204 cps           | 13.6 %        |
| 80Se (KED)  | -0.059 ppb            | 1,167 cps         | 6.5 %         |
| 85Rb (KED)  | 0.856 ppb             | 5,622 cps         | 0.3 %         |
| 88Sr (KED)  | 1.704 ppb             | 15,866 cps        | 1.6 %         |
| 89Y (KED)   | 101.547 %             | 488,485 cps       | 0.3 %         |
| 107Ag (KED) | 0.021 ppb             | 1,241 cps         | 3.8 %         |
| 114Cd (KED) | 0.022 ppb             | 406 cps           | 11.7 %        |
| 115In (KED) | 99.988 %              | 851,910 cps       | 1.3 %         |
| 133Cs (KED) | 0.036 ppb             | 1,126 cps         | 0.6 %         |
| 138Ba (KED) | 2.226 ppb             | 101,295 cps       | 1.2 %         |
| 139La (KED) | 0.169 ppb             | 16,348 cps        | 1.4 %         |
| 140Ce (KED) | 0.380 ppb             | 49,384 cps        | 0.7 %         |
| 141Pr (KED) | 0.040 ppb             | 5,482 cps         | 1.9 %         |
| 142Nd (KED) | 0.231 ppb             | 12,557 cps        | 2.2 %         |
| 152Sm (KED) | 0.029 ppb             | 1,461 cps         | 7.8 %         |
| 153Eu (KED) | 0.006 ppb             | 629 cps           | 6.8 %         |
| 158Gd (KED) | 0.028 ppb             | 1,859 cps         | 8.0 %         |
| 159Tb (KED) | 104.697 %             | 4,961,256 cps     | 2.0 %         |
| 164Dy (KED) | 0.019 ppb             | 1,426 cps         | 5.4 %         |
| 166Er (KED) | 0.009 ppb             | 1,247 cps         | 5.6 %         |
| 169Tm (KED) | 0.001 ppb             | 346 cps           | 12.0 %        |
| 174Yb (KED) | 0.007 ppb             | 782 cps           | 11.6 %        |
| 175Lu (KED) | -0.101 ppb            | 19,538 cps        | 1.7 %         |
| 205Tl (KED) | 0.004 ppb             | 831 cps           | 7.9 %         |
| 208Pb (KED) | 0.319 ppb             | 47,571 cps        | 0.5 %         |
| 209Bi (KED) | 97.439 %              | 3,470,497 cps     | 0.7 %         |
| 232Th (KED) | 0.048 ppb             | 13,108 cps        | 1.9 %         |
| 238U (KED)  | 0.012 ppb             | 3,827 cps         | 3.6 %         |

## Sample Summary

Instrument ID: iCAP Q

Analysis index: 15

Analysis name: 80160ti

Analysis started at: 10/28/2021 3:39:22 PM

User name: WINDOWS-UPCI4ER\Administrator

| Category    | Concentration average | Concentration RSD |
|-------------|-----------------------|-------------------|
| 6Li (KED)   | 107.475 %             | 5.7 %             |
| 9Be (KED)   | 0.000 ppb             |                   |
| 11B (KED)   | -2.682 ppb            | 17.4 %            |
| 24Mg (KED)  | 98.294 ppb            | 5.6 %             |
| 27Al (KED)  | 140.836 ppb           | 2.0 %             |
| 45Sc (KED)  | 105.878 %             | 1.0 %             |
| 51V (KED)   | 0.269 ppb             | 3.0 %             |
| 52Cr (KED)  | 0.830 ppb             | 0.9 %             |
| 55Mn (KED)  | 4.896 ppb             | 1.3 %             |
| 56Fe (KED)  | 164.080 ppb           | 1.2 %             |
| 58Ni (KED)  | 0.819 ppb             | 1.4 %             |
| 59Co (KED)  | 0.075 ppb             | 1.4 %             |
| 63Cu (KED)  | 2.123 ppb             | 2.5 %             |
| 64Zn (KED)  | 58.081 ppb            | 0.5 %             |
| 69Ga (KED)  | 0.594 ppb             | 3.5 %             |
| 75As (KED)  | 0.120 ppb             | 2.5 %             |
| 80Se (KED)  | 0.086 ppb             | 311.0 %           |
| 85Rb (KED)  | 0.857 ppb             | 2.5 %             |
| 88Sr (KED)  | 1.232 ppb             | 2.1 %             |
| 89Y (KED)   | 101.729 %             | 1.2 %             |
| 107Ag (KED) | 0.032 ppb             | 7.5 %             |
| 114Cd (KED) | 0.020 ppb             | 5.7 %             |
| 115In (KED) | 101.572 %             | 1.0 %             |
| 133Cs (KED) | 0.028 ppb             | 4.8 %             |
| 138Ba (KED) | 1.904 ppb             | 1.0 %             |
| 139La (KED) | 0.151 ppb             | 0.7 %             |
| 140Ce (KED) | 0.323 ppb             | 1.8 %             |
| 141Pr (KED) | 0.033 ppb             | 2.7 %             |
| 142Nd (KED) | 0.200 ppb             | 1.9 %             |
| 152Sm (KED) | 0.025 ppb             | 1.2 %             |
| 153Eu (KED) | 0.004 ppb             | 6.9 %             |
| 158Gd (KED) | 0.021 ppb             | 4.2 %             |
| 159Tb (KED) | 104.357 %             | 0.5 %             |
| 164Dy (KED) | 0.015 ppb             | 1.8 %             |
| 166Er (KED) | 0.006 ppb             | 24.6 %            |
| 169Tm (KED) | 0.001 ppb             | 6.3 %             |
| 174Yb (KED) | 0.006 ppb             | 0.6 %             |
| 175Lu (KED) | -0.101 ppb            | 3.8 %             |
| 205Tl (KED) | 0.004 ppb             | 3.9 %             |
| 208Pb (KED) | 0.281 ppb             | 1.4 %             |
| 209Bi (KED) | 97.830 %              | 0.6 %             |
| 232Th (KED) | 0.047 ppb             | 0.4 %             |
| 238U (KED)  | 0.010 ppb             | 3.0 %             |

| Category   | Concentration average | Intensity average | Intensity RSD |
|------------|-----------------------|-------------------|---------------|
| 6Li (KED)  | 107.475 %             | 3,292 cps         | 5.7 %         |
| 9Be (KED)  | 0.000 ppb             | 0 cps             |               |
| 11B (KED)  | -2.682 ppb            | 363 cps           | 7.5 %         |
| 24Mg (KED) | 98.294 ppb            | 61,345 cps        | 0.3 %         |
| 27Al (KED) | 140.836 ppb           | 21,635 cps        | 0.9 %         |

| Category    | Concentration average | Intensity average | Intensity RSD |
|-------------|-----------------------|-------------------|---------------|
| 45Sc (KED)  | 105.878 %             | 55,159 cps        | 1.0 %         |
| 51V (KED)   | 0.269 ppb             | 2,629 cps         | 2.0 %         |
| 52Cr (KED)  | 0.830 ppb             | 12,730 cps        | 0.6 %         |
| 55Mn (KED)  | 4.896 ppb             | 37,516 cps        | 0.9 %         |
| 56Fe (KED)  | 164.080 ppb           | 2,286,388 cps     | 0.2 %         |
| 58Ni (KED)  | 0.819 ppb             | 14,960 cps        | 1.2 %         |
| 59Co (KED)  | 0.075 ppb             | 2,254 cps         | 2.4 %         |
| 63Cu (KED)  | 2.123 ppb             | 46,238 cps        | 1.3 %         |
| 64Zn (KED)  | 58.081 ppb            | 266,851 cps       | 0.8 %         |
| 69Ga (KED)  | 0.594 ppb             | 4,214 cps         | 3.4 %         |
| 75As (KED)  | 0.120 ppb             | 182 cps           | 2.8 %         |
| 80Se (KED)  | 0.086 ppb             | 1,230 cps         | 9.0 %         |
| 85Rb (KED)  | 0.857 ppb             | 5,639 cps         | 3.5 %         |
| 88Sr (KED)  | 1.232 ppb             | 11,513 cps        | 1.5 %         |
| 89Y (KED)   | 101.729 %             | 489,361 cps       | 1.2 %         |
| 107Ag (KED) | 0.032 ppb             | 1,897 cps         | 6.9 %         |
| 114Cd (KED) | 0.020 ppb             | 384 cps           | 4.9 %         |
| 115In (KED) | 101.572 %             | 865,402 cps       | 1.0 %         |
| 133Cs (KED) | 0.028 ppb             | 897 cps           | 4.0 %         |
| 138Ba (KED) | 1.904 ppb             | 86,473 cps        | 1.1 %         |
| 139La (KED) | 0.151 ppb             | 14,557 cps        | 0.8 %         |
| 140Ce (KED) | 0.323 ppb             | 41,849 cps        | 2.3 %         |
| 141Pr (KED) | 0.033 ppb             | 4,504 cps         | 3.2 %         |
| 142Nd (KED) | 0.200 ppb             | 10,828 cps        | 1.8 %         |
| 152Sm (KED) | 0.025 ppb             | 1,219 cps         | 1.6 %         |
| 153Eu (KED) | 0.004 ppb             | 453 cps           | 7.2 %         |
| 158Gd (KED) | 0.021 ppb             | 1,429 cps         | 4.5 %         |
| 159Tb (KED) | 104.357 %             | 4,945,143 cps     | 0.5 %         |
| 164Dy (KED) | 0.015 ppb             | 1,132 cps         | 2.0 %         |
| 166Er (KED) | 0.006 ppb             | 1,022 cps         | 12.9 %        |
| 169Tm (KED) | 0.001 ppb             | 301 cps           | 6.1 %         |
| 174Yb (KED) | 0.006 ppb             | 629 cps           | 0.8 %         |
| 175Lu (KED) | -0.101 ppb            | 19,369 cps        | 3.6 %         |
| 205Tl (KED) | 0.004 ppb             | 734 cps           | 4.2 %         |
| 208Pb (KED) | 0.281 ppb             | 42,595 cps        | 1.4 %         |
| 209Bi (KED) | 97.830 %              | 3,484,413 cps     | 0.6 %         |
| 232Th (KED) | 0.047 ppb             | 12,770 cps        | 0.9 %         |
| 238U (KED)  | 0.010 ppb             | 3,360 cps         | 3.5 %         |

## Sample Summary

Instrument ID: iCAP Q

Analysis index: 16

Analysis name: 80030jian

Analysis started at: 10/28/2021 3:42:34 PM

User name: WINDOWS-UPCI4ER\Administrator

| Category    | Concentration average | Concentration RSD |
|-------------|-----------------------|-------------------|
| 6Li (KED)   | 108.673 %             | 2.2 %             |
| 9Be (KED)   | 0.014 ppb             | 173.2 %           |
| 11B (KED)   | 9.077 ppb             | 13.1 %            |
| 24Mg (KED)  | 87.435 ppb            | 2.6 %             |
| 27Al (KED)  | 125.947 ppb           | 1.3 %             |
| 45Sc (KED)  | 105.563 %             | 0.3 %             |
| 51V (KED)   | 0.245 ppb             | 4.8 %             |
| 52Cr (KED)  | 0.804 ppb             | 0.3 %             |
| 55Mn (KED)  | 4.070 ppb             | 1.5 %             |
| 56Fe (KED)  | 147.331 ppb           | 1.1 %             |
| 58Ni (KED)  | 0.830 ppb             | 2.1 %             |
| 59Co (KED)  | 0.069 ppb             | 2.6 %             |
| 63Cu (KED)  | 2.041 ppb             | 1.4 %             |
| 64Zn (KED)  | 55.620 ppb            | 0.9 %             |
| 69Ga (KED)  | 0.477 ppb             | 1.4 %             |
| 75As (KED)  | 0.098 ppb             | 16.5 %            |
| 80Se (KED)  | 0.190 ppb             | 59.1 %            |
| 85Rb (KED)  | 0.719 ppb             | 3.1 %             |
| 88Sr (KED)  | 1.087 ppb             | 0.6 %             |
| 89Y (KED)   | 103.550 %             | 0.6 %             |
| 107Ag (KED) | 0.034 ppb             | 3.2 %             |
| 114Cd (KED) | 0.014 ppb             | 6.7 %             |
| 115In (KED) | 101.318 %             | 1.0 %             |
| 133Cs (KED) | 0.026 ppb             | 3.3 %             |
| 138Ba (KED) | 1.595 ppb             | 1.9 %             |
| 139La (KED) | 0.136 ppb             | 4.1 %             |
| 140Ce (KED) | 0.355 ppb             | 1.3 %             |
| 141Pr (KED) | 0.031 ppb             | 2.5 %             |
| 142Nd (KED) | 0.192 ppb             | 1.9 %             |
| 152Sm (KED) | 0.023 ppb             | 2.9 %             |
| 153Eu (KED) | 0.004 ppb             | 4.0 %             |
| 158Gd (KED) | 0.020 ppb             | 9.0 %             |
| 159Tb (KED) | 103.319 %             | 1.4 %             |
| 164Dy (KED) | 0.013 ppb             | 0.9 %             |
| 166Er (KED) | 0.006 ppb             | 5.5 %             |
| 169Tm (KED) | 0.001 ppb             | 5.5 %             |
| 174Yb (KED) | 0.005 ppb             | 6.3 %             |
| 175Lu (KED) | -0.105 ppb            | 2.0 %             |
| 205Tl (KED) | 0.003 ppb             | 9.7 %             |
| 208Pb (KED) | 0.263 ppb             | 0.1 %             |
| 209Bi (KED) | 97.704 %              | 0.8 %             |
| 232Th (KED) | 0.040 ppb             | 0.4 %             |
| 238U (KED)  | 0.009 ppb             | 2.3 %             |

| Category   | Concentration average | Intensity average | Intensity RSD |
|------------|-----------------------|-------------------|---------------|
| 6Li (KED)  | 108.673 %             | 3,328 cps         | 2.2 %         |
| 9Be (KED)  | 0.014 ppb             | 2 cps             | 173.2 %       |
| 11B (KED)  | 9.077 ppb             | 1,363 cps         | 5.4 %         |
| 24Mg (KED) | 87.435 ppb            | 55,291 cps        | 1.4 %         |
| 27Al (KED) | 125.947 ppb           | 19,302 cps        | 1.1 %         |

| Category    | Concentration average | Intensity average | Intensity RSD |
|-------------|-----------------------|-------------------|---------------|
| 45Sc (KED)  | 105.563 %             | 54,995 cps        | 0.3 %         |
| 51V (KED)   | 0.245 ppb             | 2,387 cps         | 4.5 %         |
| 52Cr (KED)  | 0.804 ppb             | 12,307 cps        | 0.3 %         |
| 55Mn (KED)  | 4.070 ppb             | 31,101 cps        | 1.2 %         |
| 56Fe (KED)  | 147.331 ppb           | 2,047,262 cps     | 1.0 %         |
| 58Ni (KED)  | 0.830 ppb             | 15,112 cps        | 2.2 %         |
| 59Co (KED)  | 0.069 ppb             | 2,070 cps         | 2.8 %         |
| 63Cu (KED)  | 2.041 ppb             | 45,341 cps        | 1.7 %         |
| 64Zn (KED)  | 55.620 ppb            | 260,206 cps       | 0.7 %         |
| 69Ga (KED)  | 0.477 ppb             | 3,457 cps         | 1.7 %         |
| 75As (KED)  | 0.098 ppb             | 153 cps           | 15.2 %        |
| 80Se (KED)  | 0.190 ppb             | 1,298 cps         | 4.2 %         |
| 85Rb (KED)  | 0.719 ppb             | 4,815 cps         | 2.9 %         |
| 88Sr (KED)  | 1.087 ppb             | 10,349 cps        | 0.4 %         |
| 89Y (KED)   | 103.550 %             | 498,117 cps       | 0.6 %         |
| 107Ag (KED) | 0.034 ppb             | 2,030 cps         | 2.1 %         |
| 114Cd (KED) | 0.014 ppb             | 278 cps           | 7.3 %         |
| 115In (KED) | 101.318 %             | 863,239 cps       | 1.0 %         |
| 133Cs (KED) | 0.026 ppb             | 831 cps           | 2.2 %         |
| 138Ba (KED) | 1.595 ppb             | 71,813 cps        | 0.8 %         |
| 139La (KED) | 0.136 ppb             | 13,049 cps        | 2.7 %         |
| 140Ce (KED) | 0.355 ppb             | 45,591 cps        | 0.7 %         |
| 141Pr (KED) | 0.031 ppb             | 4,202 cps         | 1.5 %         |
| 142Nd (KED) | 0.192 ppb             | 10,315 cps        | 1.7 %         |
| 152Sm (KED) | 0.023 ppb             | 1,133 cps         | 1.8 %         |
| 153Eu (KED) | 0.004 ppb             | 434 cps           | 4.7 %         |
| 158Gd (KED) | 0.020 ppb             | 1,313 cps         | 10.0 %        |
| 159Tb (KED) | 103.319 %             | 4,895,945 cps     | 1.4 %         |
| 164Dy (KED) | 0.013 ppb             | 1,002 cps         | 2.2 %         |
| 166Er (KED) | 0.006 ppb             | 1,022 cps         | 2.3 %         |
| 169Tm (KED) | 0.001 ppb             | 289 cps           | 4.1 %         |
| 174Yb (KED) | 0.005 ppb             | 566 cps           | 5.4 %         |
| 175Lu (KED) | -0.105 ppb            | 18,596 cps        | 2.4 %         |
| 205Tl (KED) | 0.003 ppb             | 644 cps           | 9.5 %         |
| 208Pb (KED) | 0.263 ppb             | 40,012 cps        | 0.9 %         |
| 209Bi (KED) | 97.704 %              | 3,479,955 cps     | 0.8 %         |
| 232Th (KED) | 0.040 ppb             | 10,848 cps        | 0.4 %         |
| 238U (KED)  | 0.009 ppb             | 2,978 cps         | 3.0 %         |

## Sample Summary

Instrument ID: iCAP Q

Analysis index: 17

Analysis name: 80031jian

Analysis started at: 10/28/2021 3:45:43 PM

User name: WINDOWS-UPCI4ER\Administrator

| Category    | Concentration average | Concentration RSD |
|-------------|-----------------------|-------------------|
| 6Li (KED)   | 113.028 %             | 2.5 %             |
| 9Be (KED)   | 0.007 ppb             | 173.2 %           |
| 11B (KED)   | 2.261 ppb             | 32.1 %            |
| 24Mg (KED)  | 79.262 ppb            | 3.0 %             |
| 27Al (KED)  | 144.243 ppb           | 1.2 %             |
| 45Sc (KED)  | 106.392 %             | 1.1 %             |
| 51V (KED)   | 0.289 ppb             | 5.1 %             |
| 52Cr (KED)  | 0.673 ppb             | 1.4 %             |
| 55Mn (KED)  | 5.809 ppb             | 2.1 %             |
| 56Fe (KED)  | 143.810 ppb           | 1.5 %             |
| 58Ni (KED)  | 0.849 ppb             | 1.5 %             |
| 59Co (KED)  | 0.080 ppb             | 2.5 %             |
| 63Cu (KED)  | 2.187 ppb             | 1.9 %             |
| 64Zn (KED)  | 53.313 ppb            | 1.9 %             |
| 69Ga (KED)  | 0.579 ppb             | 0.4 %             |
| 75As (KED)  | 0.103 ppb             | 10.8 %            |
| 80Se (KED)  | 0.226 ppb             | 121.8 %           |
| 85Rb (KED)  | 0.442 ppb             | 4.7 %             |
| 88Sr (KED)  | 1.348 ppb             | 0.7 %             |
| 89Y (KED)   | 103.147 %             | 1.8 %             |
| 107Ag (KED) | 0.048 ppb             | 4.9 %             |
| 114Cd (KED) | 0.025 ppb             | 7.1 %             |
| 115In (KED) | 102.391 %             | 1.6 %             |
| 133Cs (KED) | 0.028 ppb             | 3.8 %             |
| 138Ba (KED) | 1.925 ppb             | 2.9 %             |
| 139La (KED) | 0.131 ppb             | 1.0 %             |
| 140Ce (KED) | 0.296 ppb             | 2.2 %             |
| 141Pr (KED) | 0.030 ppb             | 2.6 %             |
| 142Nd (KED) | 0.173 ppb             | 1.5 %             |
| 152Sm (KED) | 0.023 ppb             | 8.1 %             |
| 153Eu (KED) | 0.004 ppb             | 6.2 %             |
| 158Gd (KED) | 0.020 ppb             | 2.7 %             |
| 159Tb (KED) | 104.454 %             | 0.8 %             |
| 164Dy (KED) | 0.013 ppb             | 11.8 %            |
| 166Er (KED) | 0.005 ppb             | 18.7 %            |
| 169Tm (KED) | 0.001 ppb             | 19.6 %            |
| 174Yb (KED) | 0.005 ppb             | 6.6 %             |
| 175Lu (KED) | -0.105 ppb            | 1.5 %             |
| 205Tl (KED) | 0.003 ppb             | 1.3 %             |
| 208Pb (KED) | 0.275 ppb             | 1.4 %             |
| 209Bi (KED) | 98.969 %              | 1.2 %             |
| 232Th (KED) | 0.035 ppb             | 1.5 %             |
| 238U (KED)  | 0.008 ppb             | 1.9 %             |

| Category   | Concentration average | Intensity average | Intensity RSD |
|------------|-----------------------|-------------------|---------------|
| 6Li (KED)  | 113.028 %             | 3,462 cps         | 2.5 %         |
| 9Be (KED)  | 0.007 ppb             | 1 cps             | 173.2 %       |
| 11B (KED)  | 2.261 ppb             | 818 cps           | 5.3 %         |
| 24Mg (KED) | 79.262 ppb            | 52,138 cps        | 1.1 %         |
| 27Al (KED) | 144.243 ppb           | 22,265 cps        | 0.4 %         |

| Category    | Concentration average | Intensity average | Intensity RSD |
|-------------|-----------------------|-------------------|---------------|
| 45Sc (KED)  | 106.392 %             | 55,427 cps        | 1.1 %         |
| 51V (KED)   | 0.289 ppb             | 2,844 cps         | 4.2 %         |
| 52Cr (KED)  | 0.673 ppb             | 10,385 cps        | 0.6 %         |
| 55Mn (KED)  | 5.809 ppb             | 44,712 cps        | 0.9 %         |
| 56Fe (KED)  | 143.810 ppb           | 2,014,097 cps     | 1.9 %         |
| 58Ni (KED)  | 0.849 ppb             | 15,575 cps        | 0.5 %         |
| 59Co (KED)  | 0.080 ppb             | 2,412 cps         | 2.0 %         |
| 63Cu (KED)  | 2.187 ppb             | 48,223 cps        | 1.0 %         |
| 64Zn (KED)  | 53.313 ppb            | 248,481 cps       | 0.3 %         |
| 69Ga (KED)  | 0.579 ppb             | 4,166 cps         | 1.4 %         |
| 75As (KED)  | 0.103 ppb             | 160 cps           | 10.4 %        |
| 80Se (KED)  | 0.226 ppb             | 1,307 cps         | 7.4 %         |
| 85Rb (KED)  | 0.442 ppb             | 2,951 cps         | 3.1 %         |
| 88Sr (KED)  | 1.348 ppb             | 12,761 cps        | 2.0 %         |
| 89Y (KED)   | 103.147 %             | 496,179 cps       | 1.8 %         |
| 107Ag (KED) | 0.048 ppb             | 2,868 cps         | 3.3 %         |
| 114Cd (KED) | 0.025 ppb             | 478 cps           | 8.4 %         |
| 115In (KED) | 102.391 %             | 872,386 cps       | 1.6 %         |
| 133Cs (KED) | 0.028 ppb             | 881 cps           | 3.5 %         |
| 138Ba (KED) | 1.925 ppb             | 87,520 cps        | 2.1 %         |
| 139La (KED) | 0.131 ppb             | 12,722 cps        | 0.8 %         |
| 140Ce (KED) | 0.296 ppb             | 38,436 cps        | 2.2 %         |
| 141Pr (KED) | 0.030 ppb             | 4,090 cps         | 2.6 %         |
| 142Nd (KED) | 0.173 ppb             | 9,368 cps         | 1.2 %         |
| 152Sm (KED) | 0.023 ppb             | 1,133 cps         | 8.8 %         |
| 153Eu (KED) | 0.004 ppb             | 429 cps           | 6.6 %         |
| 158Gd (KED) | 0.020 ppb             | 1,340 cps         | 3.5 %         |
| 159Tb (KED) | 104.454 %             | 4,949,736 cps     | 0.8 %         |
| 164Dy (KED) | 0.013 ppb             | 979 cps           | 11.6 %        |
| 166Er (KED) | 0.005 ppb             | 903 cps           | 8.9 %         |
| 169Tm (KED) | 0.001 ppb             | 253 cps           | 18.6 %        |
| 174Yb (KED) | 0.005 ppb             | 522 cps           | 6.7 %         |
| 175Lu (KED) | -0.105 ppb            | 18,705 cps        | 1.6 %         |
| 205Tl (KED) | 0.003 ppb             | 684 cps           | 2.4 %         |
| 208Pb (KED) | 0.275 ppb             | 42,217 cps        | 0.3 %         |
| 209Bi (KED) | 98.969 %              | 3,524,998 cps     | 1.2 %         |
| 232Th (KED) | 0.035 ppb             | 9,779 cps         | 1.0 %         |
| 238U (KED)  | 0.008 ppb             | 2,664 cps         | 1.9 %         |

## Sample Summary

Instrument ID: iCAP Q

Analysis index: 18

Analysis name: 80098ti

Analysis started at: 10/28/2021 3:48:52 PM

User name: WINDOWS-UPCI4ER\Administrator

| Category    | Concentration average | Concentration RSD |
|-------------|-----------------------|-------------------|
| 6Li (KED)   | 112.266 %             | 3.4 %             |
| 9Be (KED)   | 0.014 ppb             | 86.7 %            |
| 11B (KED)   | 13.382 ppb            | 8.9 %             |
| 24Mg (KED)  | 88.717 ppb            | 3.8 %             |
| 27Al (KED)  | 139.736 ppb           | 3.7 %             |
| 45Sc (KED)  | 105.006 %             | 1.6 %             |
| 51V (KED)   | 0.288 ppb             | 4.2 %             |
| 52Cr (KED)  | 1.301 ppb             | 0.8 %             |
| 55Mn (KED)  | 8.009 ppb             | 1.6 %             |
| 56Fe (KED)  | 144.770 ppb           | 2.1 %             |
| 58Ni (KED)  | 0.898 ppb             | 0.1 %             |
| 59Co (KED)  | 0.105 ppb             | 1.7 %             |
| 63Cu (KED)  | 2.158 ppb             | 1.4 %             |
| 64Zn (KED)  | 51.332 ppb            | 1.8 %             |
| 69Ga (KED)  | 0.691 ppb             | 2.0 %             |
| 75As (KED)  | 0.178 ppb             | 2.3 %             |
| 80Se (KED)  | 0.053 ppb             | 38.8 %            |
| 85Rb (KED)  | 0.298 ppb             | 3.3 %             |
| 88Sr (KED)  | 1.841 ppb             | 1.6 %             |
| 89Y (KED)   | 103.445 %             | 0.9 %             |
| 107Ag (KED) | 0.042 ppb             | 2.4 %             |
| 114Cd (KED) | 0.037 ppb             | 11.5 %            |
| 115In (KED) | 101.410 %             | 0.5 %             |
| 133Cs (KED) | 0.025 ppb             | 3.8 %             |
| 138Ba (KED) | 2.338 ppb             | 2.3 %             |
| 139La (KED) | 0.142 ppb             | 1.2 %             |
| 140Ce (KED) | 0.333 ppb             | 1.2 %             |
| 141Pr (KED) | 0.034 ppb             | 6.5 %             |
| 142Nd (KED) | 0.201 ppb             | 0.8 %             |
| 152Sm (KED) | 0.025 ppb             | 5.2 %             |
| 153Eu (KED) | 0.006 ppb             | 10.6 %            |
| 158Gd (KED) | 0.023 ppb             | 2.7 %             |
| 159Tb (KED) | 104.610 %             | 0.6 %             |
| 164Dy (KED) | 0.015 ppb             | 2.3 %             |
| 166Er (KED) | 0.007 ppb             | 5.2 %             |
| 169Tm (KED) | 0.001 ppb             | 14.3 %            |
| 174Yb (KED) | 0.006 ppb             | 1.3 %             |
| 175Lu (KED) | -0.103 ppb            | 2.6 %             |
| 205Tl (KED) | 0.003 ppb             | 8.8 %             |
| 208Pb (KED) | 0.380 ppb             | 1.4 %             |
| 209Bi (KED) | 99.576 %              | 1.7 %             |
| 232Th (KED) | 0.036 ppb             | 2.0 %             |
| 238U (KED)  | 0.010 ppb             | 4.4 %             |

| Category   | Concentration average | Intensity average | Intensity RSD |
|------------|-----------------------|-------------------|---------------|
| 6Li (KED)  | 112.266 %             | 3,438 cps         | 3.4 %         |
| 9Be (KED)  | 0.014 ppb             | 2 cps             | 86.6 %        |
| 11B (KED)  | 13.382 ppb            | 1,785 cps         | 3.3 %         |
| 24Mg (KED) | 88.717 ppb            | 57,935 cps        | 2.6 %         |
| 27Al (KED) | 139.736 ppb           | 21,285 cps        | 2.1 %         |

| Category    | Concentration average | Intensity average | Intensity RSD |
|-------------|-----------------------|-------------------|---------------|
| 45Sc (KED)  | 105.006 %             | 54,705 cps        | 1.6 %         |
| 51V (KED)   | 0.288 ppb             | 2,790 cps         | 2.7 %         |
| 52Cr (KED)  | 1.301 ppb             | 19,779 cps        | 0.9 %         |
| 55Mn (KED)  | 8.009 ppb             | 60,823 cps        | 0.4 %         |
| 56Fe (KED)  | 144.770 ppb           | 2,000,723 cps     | 0.9 %         |
| 58Ni (KED)  | 0.898 ppb             | 16,253 cps        | 1.7 %         |
| 59Co (KED)  | 0.105 ppb             | 3,129 cps         | 2.6 %         |
| 63Cu (KED)  | 2.158 ppb             | 47,760 cps        | 0.6 %         |
| 64Zn (KED)  | 51.332 ppb            | 240,055 cps       | 1.4 %         |
| 69Ga (KED)  | 0.691 ppb             | 4,982 cps         | 1.1 %         |
| 75As (KED)  | 0.178 ppb             | 269 cps           | 2.9 %         |
| 80Se (KED)  | 0.053 ppb             | 1,237 cps         | 1.4 %         |
| 85Rb (KED)  | 0.298 ppb             | 2,005 cps         | 2.6 %         |
| 88Sr (KED)  | 1.841 ppb             | 17,452 cps        | 2.5 %         |
| 89Y (KED)   | 103.445 %             | 497,615 cps       | 0.9 %         |
| 107Ag (KED) | 0.042 ppb             | 2,461 cps         | 1.9 %         |
| 114Cd (KED) | 0.037 ppb             | 702 cps           | 11.5 %        |
| 115In (KED) | 101.410 %             | 864,028 cps       | 0.5 %         |
| 133Cs (KED) | 0.025 ppb             | 806 cps           | 3.6 %         |
| 138Ba (KED) | 2.338 ppb             | 106,286 cps       | 1.8 %         |
| 139La (KED) | 0.142 ppb             | 13,811 cps        | 1.2 %         |
| 140Ce (KED) | 0.333 ppb             | 43,346 cps        | 1.1 %         |
| 141Pr (KED) | 0.034 ppb             | 4,570 cps         | 5.9 %         |
| 142Nd (KED) | 0.201 ppb             | 10,916 cps        | 1.2 %         |
| 152Sm (KED) | 0.025 ppb             | 1,259 cps         | 4.7 %         |
| 153Eu (KED) | 0.006 ppb             | 560 cps           | 9.8 %         |
| 158Gd (KED) | 0.023 ppb             | 1,527 cps         | 2.4 %         |
| 159Tb (KED) | 104.610 %             | 4,957,111 cps     | 0.6 %         |
| 164Dy (KED) | 0.015 ppb             | 1,111 cps         | 1.7 %         |
| 166Er (KED) | 0.007 ppb             | 1,050 cps         | 2.8 %         |
| 169Tm (KED) | 0.001 ppb             | 296 cps           | 13.2 %        |
| 174Yb (KED) | 0.006 ppb             | 628 cps           | 1.7 %         |
| 175Lu (KED) | -0.103 ppb            | 19,070 cps        | 2.4 %         |
| 205Tl (KED) | 0.003 ppb             | 678 cps           | 9.3 %         |
| 208Pb (KED) | 0.380 ppb             | 57,111 cps        | 0.6 %         |
| 209Bi (KED) | 99.576 %              | 3,546,609 cps     | 1.7 %         |
| 232Th (KED) | 0.036 ppb             | 10,187 cps        | 0.3 %         |
| 238U (KED)  | 0.010 ppb             | 3,194 cps         | 2.8 %         |

## Sample Summary

Instrument ID: iCAP Q

Analysis index: 19

Analysis name: 80131jian

Analysis started at: 10/28/2021 3:52:17 PM

User name: WINDOWS-UPCI4ER\Administrator

| Category    | Concentration average | Concentration RSD |
|-------------|-----------------------|-------------------|
| 6Li (KED)   | 104.863 %             | 2.7 %             |
| 9Be (KED)   | 0.008 ppb             | 173.2 %           |
| 11B (KED)   | 1.761 ppb             | 18.0 %            |
| 24Mg (KED)  | 89.327 ppb            | 1.4 %             |
| 27Al (KED)  | 139.585 ppb           | 1.6 %             |
| 45Sc (KED)  | 106.627 %             | 0.6 %             |
| 51V (KED)   | 0.244 ppb             | 3.1 %             |
| 52Cr (KED)  | 1.109 ppb             | 5.2 %             |
| 55Mn (KED)  | 3.663 ppb             | 2.1 %             |
| 56Fe (KED)  | 129.196 ppb           | 1.2 %             |
| 58Ni (KED)  | 0.985 ppb             | 0.9 %             |
| 59Co (KED)  | 0.091 ppb             | 1.9 %             |
| 63Cu (KED)  | 2.170 ppb             | 1.4 %             |
| 64Zn (KED)  | 51.231 ppb            | 0.6 %             |
| 69Ga (KED)  | 0.479 ppb             | 0.6 %             |
| 75As (KED)  | 0.132 ppb             | 27.8 %            |
| 80Se (KED)  | 0.161 ppb             | 49.7 %            |
| 85Rb (KED)  | 0.576 ppb             | 4.0 %             |
| 88Sr (KED)  | 2.047 ppb             | 2.6 %             |
| 89Y (KED)   | 103.426 %             | 1.4 %             |
| 107Ag (KED) | 0.052 ppb             | 0.4 %             |
| 114Cd (KED) | 0.016 ppb             | 10.2 %            |
| 115In (KED) | 103.229 %             | 1.4 %             |
| 133Cs (KED) | 0.023 ppb             | 5.9 %             |
| 138Ba (KED) | 1.652 ppb             | 2.6 %             |
| 139La (KED) | 0.130 ppb             | 1.6 %             |
| 140Ce (KED) | 0.319 ppb             | 1.7 %             |
| 141Pr (KED) | 0.032 ppb             | 2.6 %             |
| 142Nd (KED) | 0.188 ppb             | 1.1 %             |
| 152Sm (KED) | 0.022 ppb             | 3.6 %             |
| 153Eu (KED) | 0.004 ppb             | 17.0 %            |
| 158Gd (KED) | 0.020 ppb             | 7.0 %             |
| 159Tb (KED) | 105.783 %             | 0.4 %             |
| 164Dy (KED) | 0.015 ppb             | 5.5 %             |
| 166Er (KED) | 0.011 ppb             | 86.6 %            |
| 169Tm (KED) | 0.001 ppb             | 10.7 %            |
| 174Yb (KED) | 0.005 ppb             | 6.9 %             |
| 175Lu (KED) | -0.108 ppb            | 4.7 %             |
| 205Tl (KED) | 0.004 ppb             | 6.1 %             |
| 208Pb (KED) | 0.300 ppb             | 1.7 %             |
| 209Bi (KED) | 99.894 %              | 1.2 %             |
| 232Th (KED) | 0.040 ppb             | 0.7 %             |
| 238U (KED)  | 0.011 ppb             | 3.7 %             |

| Category   | Concentration average | Intensity average | Intensity RSD |
|------------|-----------------------|-------------------|---------------|
| 6Li (KED)  | 104.863 %             | 3,212 cps         | 2.7 %         |
| 9Be (KED)  | 0.008 ppb             | 1 cps             | 173.2 %       |
| 11B (KED)  | 1.761 ppb             | 719 cps           | 5.0 %         |
| 24Mg (KED) | 89.327 ppb            | 54,508 cps        | 1.3 %         |
| 27Al (KED) | 139.585 ppb           | 21,599 cps        | 1.7 %         |

| Category    | Concentration average | Intensity average | Intensity RSD |
|-------------|-----------------------|-------------------|---------------|
| 45Sc (KED)  | 106.627 %             | 55,550 cps        | 0.6 %         |
| 51V (KED)   | 0.244 ppb             | 2,402 cps         | 3.4 %         |
| 52Cr (KED)  | 1.109 ppb             | 17,127 cps        | 4.9 %         |
| 55Mn (KED)  | 3.663 ppb             | 28,282 cps        | 1.7 %         |
| 56Fe (KED)  | 129.196 ppb           | 1,813,653 cps     | 1.3 %         |
| 58Ni (KED)  | 0.985 ppb             | 18,066 cps        | 0.9 %         |
| 59Co (KED)  | 0.091 ppb             | 2,755 cps         | 2.1 %         |
| 63Cu (KED)  | 2.170 ppb             | 48,003 cps        | 0.3 %         |
| 64Zn (KED)  | 51.231 ppb            | 239,548 cps       | 1.0 %         |
| 69Ga (KED)  | 0.479 ppb             | 3,467 cps         | 1.9 %         |
| 75As (KED)  | 0.132 ppb             | 203 cps           | 26.4 %        |
| 80Se (KED)  | 0.161 ppb             | 1,283 cps         | 3.4 %         |
| 85Rb (KED)  | 0.576 ppb             | 3,856 cps         | 4.1 %         |
| 88Sr (KED)  | 2.047 ppb             | 19,392 cps        | 3.1 %         |
| 89Y (KED)   | 103.426 %             | 497,522 cps       | 1.4 %         |
| 107Ag (KED) | 0.052 ppb             | 3,132 cps         | 1.8 %         |
| 114Cd (KED) | 0.016 ppb             | 319 cps           | 10.5 %        |
| 115In (KED) | 103.229 %             | 879,521 cps       | 1.4 %         |
| 133Cs (KED) | 0.023 ppb             | 750 cps           | 4.4 %         |
| 138Ba (KED) | 1.652 ppb             | 76,166 cps        | 3.1 %         |
| 139La (KED) | 0.130 ppb             | 12,777 cps        | 1.6 %         |
| 140Ce (KED) | 0.319 ppb             | 41,895 cps        | 2.1 %         |
| 141Pr (KED) | 0.032 ppb             | 4,343 cps         | 2.4 %         |
| 142Nd (KED) | 0.188 ppb             | 10,309 cps        | 1.0 %         |
| 152Sm (KED) | 0.022 ppb             | 1,080 cps         | 3.3 %         |
| 153Eu (KED) | 0.004 ppb             | 444 cps           | 16.9 %        |
| 158Gd (KED) | 0.020 ppb             | 1,376 cps         | 7.4 %         |
| 159Tb (KED) | 105.783 %             | 5,012,713 cps     | 0.4 %         |
| 164Dy (KED) | 0.015 ppb             | 1,147 cps         | 5.0 %         |
| 166Er (KED) | 0.011 ppb             | 1,491 cps         | 58.9 %        |
| 169Tm (KED) | 0.001 ppb             | 288 cps           | 10.8 %        |
| 174Yb (KED) | 0.005 ppb             | 584 cps           | 6.3 %         |
| 175Lu (KED) | -0.108 ppb            | 18,505 cps        | 4.8 %         |
| 205Tl (KED) | 0.004 ppb             | 764 cps           | 6.4 %         |
| 208Pb (KED) | 0.300 ppb             | 46,191 cps        | 0.8 %         |
| 209Bi (KED) | 99.894 %              | 3,557,933 cps     | 1.2 %         |
| 232Th (KED) | 0.040 ppb             | 11,272 cps        | 1.3 %         |
| 238U (KED)  | 0.011 ppb             | 3,741 cps         | 2.6 %         |

## Sample Summary

Instrument ID: iCAP Q

Analysis index: 20

Analysis name: 80223jian

Analysis started at: 10/28/2021 3:55:33 PM

User name: WINDOWS-UPCI4ER\Administrator

| Category    | Concentration average | Concentration RSD |
|-------------|-----------------------|-------------------|
| 6Li (KED)   | 108.347 %             | 1.8 %             |
| 9Be (KED)   | 0.030 ppb             | 42.6 %            |
| 11B (KED)   | 25.998 ppb            | 3.2 %             |
| 24Mg (KED)  | 99.383 ppb            | 3.2 %             |
| 27Al (KED)  | 105.602 ppb           | 2.1 %             |
| 45Sc (KED)  | 106.390 %             | 1.1 %             |
| 51V (KED)   | 0.197 ppb             | 5.3 %             |
| 52Cr (KED)  | 0.605 ppb             | 1.4 %             |
| 55Mn (KED)  | 3.624 ppb             | 2.1 %             |
| 56Fe (KED)  | 112.393 ppb           | 1.6 %             |
| 58Ni (KED)  | 0.766 ppb             | 1.7 %             |
| 59Co (KED)  | 0.053 ppb             | 5.5 %             |
| 63Cu (KED)  | 2.029 ppb             | 1.6 %             |
| 64Zn (KED)  | 50.148 ppb            | 1.3 %             |
| 69Ga (KED)  | 0.425 ppb             | 2.9 %             |
| 75As (KED)  | 0.096 ppb             | 20.5 %            |
| 80Se (KED)  | 0.370 ppb             | 46.8 %            |
| 85Rb (KED)  | 0.959 ppb             | 0.2 %             |
| 88Sr (KED)  | 1.066 ppb             | 1.2 %             |
| 89Y (KED)   | 102.872 %             | 2.3 %             |
| 107Ag (KED) | 0.024 ppb             | 4.5 %             |
| 114Cd (KED) | 0.016 ppb             | 11.1 %            |
| 115In (KED) | 102.023 %             | 1.0 %             |
| 133Cs (KED) | 0.021 ppb             | 3.2 %             |
| 138Ba (KED) | 1.380 ppb             | 0.1 %             |
| 139La (KED) | 0.102 ppb             | 3.6 %             |
| 140Ce (KED) | 0.235 ppb             | 4.3 %             |
| 141Pr (KED) | 0.024 ppb             | 6.8 %             |
| 142Nd (KED) | 0.138 ppb             | 2.9 %             |
| 152Sm (KED) | 0.017 ppb             | 6.3 %             |
| 153Eu (KED) | 0.003 ppb             | 6.1 %             |
| 158Gd (KED) | 0.015 ppb             | 4.5 %             |
| 159Tb (KED) | 105.184 %             | 1.0 %             |
| 164Dy (KED) | 0.010 ppb             | 8.1 %             |
| 166Er (KED) | 0.004 ppb             | 17.9 %            |
| 169Tm (KED) | 0.001 ppb             | 10.8 %            |
| 174Yb (KED) | 0.004 ppb             | 17.2 %            |
| 175Lu (KED) | -0.104 ppb            | 1.3 %             |
| 205Tl (KED) | 0.003 ppb             | 13.4 %            |
| 208Pb (KED) | 0.185 ppb             | 2.7 %             |
| 209Bi (KED) | 99.165 %              | 0.5 %             |
| 232Th (KED) | 0.026 ppb             | 0.8 %             |
| 238U (KED)  | 0.007 ppb             | 3.9 %             |

| Category   | Concentration average | Intensity average | Intensity RSD |
|------------|-----------------------|-------------------|---------------|
| 6Li (KED)  | 108.347 %             | 3,318 cps         | 1.8 %         |
| 9Be (KED)  | 0.030 ppb             | 4 cps             | 43.3 %        |
| 11B (KED)  | 25.998 ppb            | 2,789 cps         | 1.0 %         |
| 24Mg (KED) | 99.383 ppb            | 62,642 cps        | 2.5 %         |
| 27Al (KED) | 105.602 ppb           | 16,326 cps        | 3.1 %         |

| Category    | Concentration average | Intensity average | Intensity RSD |
|-------------|-----------------------|-------------------|---------------|
| 45Sc (KED)  | 106.390 %             | 55,426 cps        | 1.1 %         |
| 51V (KED)   | 0.197 ppb             | 1,938 cps         | 6.4 %         |
| 52Cr (KED)  | 0.605 ppb             | 9,340 cps         | 2.2 %         |
| 55Mn (KED)  | 3.624 ppb             | 27,917 cps        | 2.9 %         |
| 56Fe (KED)  | 112.393 ppb           | 1,574,726 cps     | 2.8 %         |
| 58Ni (KED)  | 0.766 ppb             | 14,076 cps        | 1.9 %         |
| 59Co (KED)  | 0.053 ppb             | 1,618 cps         | 6.0 %         |
| 63Cu (KED)  | 2.029 ppb             | 44,773 cps        | 1.3 %         |
| 64Zn (KED)  | 50.148 ppb            | 233,237 cps       | 1.1 %         |
| 69Ga (KED)  | 0.425 ppb             | 3,059 cps         | 4.1 %         |
| 75As (KED)  | 0.096 ppb             | 150 cps           | 17.4 %        |
| 80Se (KED)  | 0.370 ppb             | 1,368 cps         | 7.7 %         |
| 85Rb (KED)  | 0.959 ppb             | 6,379 cps         | 2.3 %         |
| 88Sr (KED)  | 1.066 ppb             | 10,085 cps        | 1.4 %         |
| 89Y (KED)   | 102.872 %             | 494,858 cps       | 2.3 %         |
| 107Ag (KED) | 0.024 ppb             | 1,431 cps         | 5.2 %         |
| 114Cd (KED) | 0.016 ppb             | 312 cps           | 10.7 %        |
| 115In (KED) | 102.023 %             | 869,247 cps       | 1.0 %         |
| 133Cs (KED) | 0.021 ppb             | 684 cps           | 2.5 %         |
| 138Ba (KED) | 1.380 ppb             | 63,377 cps        | 1.0 %         |
| 139La (KED) | 0.102 ppb             | 9,948 cps         | 2.6 %         |
| 140Ce (KED) | 0.235 ppb             | 30,723 cps        | 3.4 %         |
| 141Pr (KED) | 0.024 ppb             | 3,305 cps         | 5.8 %         |
| 142Nd (KED) | 0.138 ppb             | 7,561 cps         | 3.2 %         |
| 152Sm (KED) | 0.017 ppb             | 833 cps           | 6.8 %         |
| 153Eu (KED) | 0.003 ppb             | 336 cps           | 6.5 %         |
| 158Gd (KED) | 0.015 ppb             | 988 cps           | 3.6 %         |
| 159Tb (KED) | 105.184 %             | 4,984,333 cps     | 1.0 %         |
| 164Dy (KED) | 0.010 ppb             | 782 cps           | 8.6 %         |
| 166Er (KED) | 0.004 ppb             | 858 cps           | 7.3 %         |
| 169Tm (KED) | 0.001 ppb             | 219 cps           | 10.1 %        |
| 174Yb (KED) | 0.004 ppb             | 483 cps           | 15.8 %        |
| 175Lu (KED) | -0.104 ppb            | 18,983 cps        | 0.5 %         |
| 205Tl (KED) | 0.003 ppb             | 604 cps           | 11.9 %        |
| 208Pb (KED) | 0.185 ppb             | 29,848 cps        | 1.9 %         |
| 209Bi (KED) | 99.165 %              | 3,531,992 cps     | 0.5 %         |
| 232Th (KED) | 0.026 ppb             | 7,203 cps         | 1.0 %         |
| 238U (KED)  | 0.007 ppb             | 2,224 cps         | 3.9 %         |

## Sample Summary

Instrument ID: iCAP Q

Analysis index: 21

Analysis name: 80186jian

Analysis started at: 10/28/2021 3:58:40 PM

User name: WINDOWS-UPCI4ER\Administrator

| Category    | Concentration average | Concentration RSD |
|-------------|-----------------------|-------------------|
| 6Li (KED)   | 112.084 %             | 1.0 %             |
| 9Be (KED)   | 0.007 ppb             | 173.2 %           |
| 11B (KED)   | 8.726 ppb             | 4.3 %             |
| 24Mg (KED)  | 77.403 ppb            | 0.9 %             |
| 27Al (KED)  | 124.961 ppb           | 1.8 %             |
| 45Sc (KED)  | 107.827 %             | 1.4 %             |
| 51V (KED)   | 0.236 ppb             | 6.9 %             |
| 52Cr (KED)  | 1.187 ppb             | 2.4 %             |
| 55Mn (KED)  | 4.112 ppb             | 2.6 %             |
| 56Fe (KED)  | 128.288 ppb           | 1.1 %             |
| 58Ni (KED)  | 1.042 ppb             | 2.3 %             |
| 59Co (KED)  | 0.066 ppb             | 4.0 %             |
| 63Cu (KED)  | 2.247 ppb             | 2.5 %             |
| 64Zn (KED)  | 51.758 ppb            | 2.0 %             |
| 69Ga (KED)  | 0.494 ppb             | 0.3 %             |
| 75As (KED)  | 0.097 ppb             | 20.1 %            |
| 80Se (KED)  | 0.053 ppb             | 153.3 %           |
| 85Rb (KED)  | 0.591 ppb             | 4.8 %             |
| 88Sr (KED)  | 1.063 ppb             | 1.3 %             |
| 89Y (KED)   | 105.262 %             | 1.8 %             |
| 107Ag (KED) | 0.136 ppb             | 3.1 %             |
| 114Cd (KED) | 0.018 ppb             | 16.4 %            |
| 115In (KED) | 103.347 %             | 1.8 %             |
| 133Cs (KED) | 0.026 ppb             | 10.2 %            |
| 138Ba (KED) | 1.699 ppb             | 0.7 %             |
| 139La (KED) | 0.112 ppb             | 1.7 %             |
| 140Ce (KED) | 0.253 ppb             | 0.6 %             |
| 141Pr (KED) | 0.027 ppb             | 2.3 %             |
| 142Nd (KED) | 0.155 ppb             | 1.0 %             |
| 152Sm (KED) | 0.018 ppb             | 10.3 %            |
| 153Eu (KED) | 0.004 ppb             | 6.3 %             |
| 158Gd (KED) | 0.016 ppb             | 4.2 %             |
| 159Tb (KED) | 103.957 %             | 1.3 %             |
| 164Dy (KED) | 0.011 ppb             | 3.0 %             |
| 166Er (KED) | 0.005 ppb             | 21.4 %            |
| 169Tm (KED) | 0.001 ppb             | 11.9 %            |
| 174Yb (KED) | 0.005 ppb             | 2.4 %             |
| 175Lu (KED) | -0.105 ppb            | 1.3 %             |
| 205Tl (KED) | 0.003 ppb             | 5.3 %             |
| 208Pb (KED) | 0.317 ppb             | 1.7 %             |
| 209Bi (KED) | 99.189 %              | 1.3 %             |
| 232Th (KED) | 0.029 ppb             | 0.7 %             |
| 238U (KED)  | 0.009 ppb             | 4.9 %             |

| Category   | Concentration average | Intensity average | Intensity RSD |
|------------|-----------------------|-------------------|---------------|
| 6Li (KED)  | 112.084 %             | 3,433 cps         | 1.0 %         |
| 9Be (KED)  | 0.007 ppb             | 1 cps             | 173.2 %       |
| 11B (KED)  | 8.726 ppb             | 1,377 cps         | 1.3 %         |
| 24Mg (KED) | 77.403 ppb            | 50,514 cps        | 0.3 %         |
| 27Al (KED) | 124.961 ppb           | 19,560 cps        | 1.1 %         |

| Category    | Concentration average | Intensity average | Intensity RSD |
|-------------|-----------------------|-------------------|---------------|
| 45Sc (KED)  | 107.827 %             | 56,175 cps        | 1.4 %         |
| 51V (KED)   | 0.236 ppb             | 2,347 cps         | 6.2 %         |
| 52Cr (KED)  | 1.187 ppb             | 18,520 cps        | 1.4 %         |
| 55Mn (KED)  | 4.112 ppb             | 32,090 cps        | 1.2 %         |
| 56Fe (KED)  | 128.288 ppb           | 1,821,014 cps     | 0.4 %         |
| 58Ni (KED)  | 1.042 ppb             | 19,310 cps        | 1.6 %         |
| 59Co (KED)  | 0.066 ppb             | 2,015 cps         | 4.8 %         |
| 63Cu (KED)  | 2.247 ppb             | 50,496 cps        | 1.0 %         |
| 64Zn (KED)  | 51.758 ppb            | 246,238 cps       | 0.4 %         |
| 69Ga (KED)  | 0.494 ppb             | 3,633 cps         | 1.5 %         |
| 75As (KED)  | 0.097 ppb             | 154 cps           | 17.3 %        |
| 80Se (KED)  | 0.053 ppb             | 1,259 cps         | 4.0 %         |
| 85Rb (KED)  | 0.591 ppb             | 4,032 cps         | 6.5 %         |
| 88Sr (KED)  | 1.063 ppb             | 10,291 cps        | 2.6 %         |
| 89Y (KED)   | 105.262 %             | 506,354 cps       | 1.8 %         |
| 107Ag (KED) | 0.136 ppb             | 8,103 cps         | 2.1 %         |
| 114Cd (KED) | 0.018 ppb             | 358 cps           | 14.0 %        |
| 115In (KED) | 103.347 %             | 880,526 cps       | 1.8 %         |
| 133Cs (KED) | 0.026 ppb             | 841 cps           | 10.4 %        |
| 138Ba (KED) | 1.699 ppb             | 76,939 cps        | 1.7 %         |
| 139La (KED) | 0.112 ppb             | 10,775 cps        | 1.4 %         |
| 140Ce (KED) | 0.253 ppb             | 32,679 cps        | 1.8 %         |
| 141Pr (KED) | 0.027 ppb             | 3,615 cps         | 3.3 %         |
| 142Nd (KED) | 0.155 ppb             | 8,365 cps         | 0.5 %         |
| 152Sm (KED) | 0.018 ppb             | 903 cps           | 10.4 %        |
| 153Eu (KED) | 0.004 ppb             | 382 cps           | 4.8 %         |
| 158Gd (KED) | 0.016 ppb             | 1,078 cps         | 3.0 %         |
| 159Tb (KED) | 103.957 %             | 4,926,155 cps     | 1.3 %         |
| 164Dy (KED) | 0.011 ppb             | 829 cps           | 1.8 %         |
| 166Er (KED) | 0.005 ppb             | 902 cps           | 9.8 %         |
| 169Tm (KED) | 0.001 ppb             | 230 cps           | 12.6 %        |
| 174Yb (KED) | 0.005 ppb             | 526 cps           | 3.2 %         |
| 175Lu (KED) | -0.105 ppb            | 18,593 cps        | 2.6 %         |
| 205Tl (KED) | 0.003 ppb             | 581 cps           | 3.7 %         |
| 208Pb (KED) | 0.317 ppb             | 48,124 cps        | 1.3 %         |
| 209Bi (KED) | 99.189 %              | 3,532,814 cps     | 1.3 %         |
| 232Th (KED) | 0.029 ppb             | 7,975 cps         | 0.6 %         |
| 238U (KED)  | 0.009 ppb             | 2,943 cps         | 4.9 %         |

## Sample Summary

Instrument ID: iCAP Q

Analysis index: 22

Analysis name: 80061jian

Analysis started at: 10/28/2021 4:01:47 PM

User name: WINDOWS-UPCI4ER\Administrator

| Category    | Concentration average | Concentration RSD |
|-------------|-----------------------|-------------------|
| 6Li (KED)   | 110.161 %             | 1.5 %             |
| 9Be (KED)   | 0.000 ppb             |                   |
| 11B (KED)   | 5.198 ppb             | 17.3 %            |
| 24Mg (KED)  | 84.271 ppb            | 2.3 %             |
| 27Al (KED)  | 133.889 ppb           | 0.7 %             |
| 45Sc (KED)  | 108.050 %             | 1.8 %             |
| 51V (KED)   | 0.280 ppb             | 3.3 %             |
| 52Cr (KED)  | 0.643 ppb             | 3.6 %             |
| 55Mn (KED)  | 5.185 ppb             | 2.3 %             |
| 56Fe (KED)  | 159.918 ppb           | 1.7 %             |
| 58Ni (KED)  | 0.760 ppb             | 3.2 %             |
| 59Co (KED)  | 0.075 ppb             | 2.1 %             |
| 63Cu (KED)  | 2.586 ppb             | 3.1 %             |
| 64Zn (KED)  | 55.572 ppb            | 1.7 %             |
| 69Ga (KED)  | 0.529 ppb             | 4.5 %             |
| 75As (KED)  | 0.112 ppb             | 12.8 %            |
| 80Se (KED)  | 0.162 ppb             | 68.1 %            |
| 85Rb (KED)  | 0.495 ppb             | 0.8 %             |
| 88Sr (KED)  | 1.270 ppb             | 0.5 %             |
| 89Y (KED)   | 103.451 %             | 0.6 %             |
| 107Ag (KED) | 0.037 ppb             | 6.2 %             |
| 114Cd (KED) | 0.017 ppb             | 10.8 %            |
| 115In (KED) | 101.763 %             | 1.4 %             |
| 133Cs (KED) | 0.028 ppb             | 10.3 %            |
| 138Ba (KED) | 1.769 ppb             | 2.6 %             |
| 139La (KED) | 0.134 ppb             | 2.2 %             |
| 140Ce (KED) | 0.301 ppb             | 1.6 %             |
| 141Pr (KED) | 0.033 ppb             | 1.8 %             |
| 142Nd (KED) | 0.184 ppb             | 2.2 %             |
| 152Sm (KED) | 0.024 ppb             | 1.2 %             |
| 153Eu (KED) | 0.005 ppb             | 9.7 %             |
| 158Gd (KED) | 0.020 ppb             | 2.4 %             |
| 159Tb (KED) | 104.788 %             | 0.6 %             |
| 164Dy (KED) | 0.014 ppb             | 5.1 %             |
| 166Er (KED) | 0.005 ppb             | 0.8 %             |
| 169Tm (KED) | 0.001 ppb             | 4.2 %             |
| 174Yb (KED) | 0.005 ppb             | 1.9 %             |
| 175Lu (KED) | -0.104 ppb            | 5.0 %             |
| 205Tl (KED) | 0.003 ppb             | 0.8 %             |
| 208Pb (KED) | 0.297 ppb             | 2.2 %             |
| 209Bi (KED) | 98.674 %              | 0.4 %             |
| 232Th (KED) | 0.037 ppb             | 1.5 %             |
| 238U (KED)  | 0.009 ppb             | 0.5 %             |

| Category   | Concentration average | Intensity average | Intensity RSD |
|------------|-----------------------|-------------------|---------------|
| 6Li (KED)  | 110.161 %             | 3,374 cps         | 1.5 %         |
| 9Be (KED)  | 0.000 ppb             | 0 cps             |               |
| 11B (KED)  | 5.198 ppb             | 1,050 cps         | 7.0 %         |
| 24Mg (KED) | 84.271 ppb            | 54,031 cps        | 1.0 %         |
| 27Al (KED) | 133.889 ppb           | 20,995 cps        | 1.2 %         |

| Category    | Concentration average | Intensity average | Intensity RSD |
|-------------|-----------------------|-------------------|---------------|
| 45Sc (KED)  | 108.050 %             | 56,291 cps        | 1.8 %         |
| 51V (KED)   | 0.280 ppb             | 2,793 cps         | 2.2 %         |
| 52Cr (KED)  | 0.643 ppb             | 10,072 cps        | 3.3 %         |
| 55Mn (KED)  | 5.185 ppb             | 40,536 cps        | 1.2 %         |
| 56Fe (KED)  | 159.918 ppb           | 2,273,869 cps     | 0.2 %         |
| 58Ni (KED)  | 0.760 ppb             | 14,184 cps        | 1.3 %         |
| 59Co (KED)  | 0.075 ppb             | 2,312 cps         | 2.4 %         |
| 63Cu (KED)  | 2.586 ppb             | 56,826 cps        | 2.7 %         |
| 64Zn (KED)  | 55.572 ppb            | 259,727 cps       | 1.1 %         |
| 69Ga (KED)  | 0.529 ppb             | 3,826 cps         | 4.5 %         |
| 75As (KED)  | 0.112 ppb             | 174 cps           | 11.7 %        |
| 80Se (KED)  | 0.162 ppb             | 1,285 cps         | 4.3 %         |
| 85Rb (KED)  | 0.495 ppb             | 3,317 cps         | 0.8 %         |
| 88Sr (KED)  | 1.270 ppb             | 12,065 cps        | 0.8 %         |
| 89Y (KED)   | 103.451 %             | 497,643 cps       | 0.6 %         |
| 107Ag (KED) | 0.037 ppb             | 2,189 cps         | 5.8 %         |
| 114Cd (KED) | 0.017 ppb             | 334 cps           | 9.0 %         |
| 115In (KED) | 101.763 %             | 867,030 cps       | 1.4 %         |
| 133Cs (KED) | 0.028 ppb             | 900 cps           | 9.3 %         |
| 138Ba (KED) | 1.769 ppb             | 80,736 cps        | 2.0 %         |
| 139La (KED) | 0.134 ppb             | 12,976 cps        | 2.7 %         |
| 140Ce (KED) | 0.301 ppb             | 39,204 cps        | 1.3 %         |
| 141Pr (KED) | 0.033 ppb             | 4,496 cps         | 2.0 %         |
| 142Nd (KED) | 0.184 ppb             | 10,004 cps        | 2.1 %         |
| 152Sm (KED) | 0.024 ppb             | 1,175 cps         | 1.0 %         |
| 153Eu (KED) | 0.005 ppb             | 463 cps           | 10.2 %        |
| 158Gd (KED) | 0.020 ppb             | 1,362 cps         | 2.7 %         |
| 159Tb (KED) | 104.788 %             | 4,965,550 cps     | 0.6 %         |
| 164Dy (KED) | 0.014 ppb             | 1,077 cps         | 4.6 %         |
| 166Er (KED) | 0.005 ppb             | 947 cps           | 0.7 %         |
| 169Tm (KED) | 0.001 ppb             | 283 cps           | 4.2 %         |
| 174Yb (KED) | 0.005 ppb             | 593 cps           | 1.7 %         |
| 175Lu (KED) | -0.104 ppb            | 18,901 cps        | 4.6 %         |
| 205Tl (KED) | 0.003 ppb             | 728 cps           | 1.2 %         |
| 208Pb (KED) | 0.297 ppb             | 45,173 cps        | 1.7 %         |
| 209Bi (KED) | 98.674 %              | 3,514,494 cps     | 0.4 %         |
| 232Th (KED) | 0.037 ppb             | 10,103 cps        | 1.1 %         |
| 238U (KED)  | 0.009 ppb             | 3,046 cps         | 0.9 %         |

## Sample Summary

Instrument ID: iCAP Q

Analysis index: 23

Analysis name: 80143jian

Analysis started at: 10/28/2021 4:04:58 PM

User name: WINDOWS-UPCI4ER\Administrator

| Category    | Concentration average | Concentration RSD |
|-------------|-----------------------|-------------------|
| 6Li (KED)   | 108.201 %             | 6.7 %             |
| 9Be (KED)   | 0.023 ppb             | 97.4 %            |
| 11B (KED)   | 0.286 ppb             | 166.4 %           |
| 24Mg (KED)  | 87.604 ppb            | 7.0 %             |
| 27Al (KED)  | 141.458 ppb           | 1.0 %             |
| 45Sc (KED)  | 105.412 %             | 0.6 %             |
| 51V (KED)   | 0.260 ppb             | 3.3 %             |
| 52Cr (KED)  | 1.121 ppb             | 1.1 %             |
| 55Mn (KED)  | 5.067 ppb             | 1.7 %             |
| 56Fe (KED)  | 171.772 ppb           | 1.1 %             |
| 58Ni (KED)  | 0.969 ppb             | 0.8 %             |
| 59Co (KED)  | 0.073 ppb             | 2.4 %             |
| 63Cu (KED)  | 2.561 ppb             | 0.8 %             |
| 64Zn (KED)  | 47.860 ppb            | 0.5 %             |
| 69Ga (KED)  | 0.559 ppb             | 3.3 %             |
| 75As (KED)  | 0.120 ppb             | 16.1 %            |
| 80Se (KED)  | 0.192 ppb             | 53.5 %            |
| 85Rb (KED)  | 0.564 ppb             | 6.7 %             |
| 88Sr (KED)  | 1.170 ppb             | 1.2 %             |
| 89Y (KED)   | 103.760 %             | 0.3 %             |
| 107Ag (KED) | 0.017 ppb             | 10.9 %            |
| 114Cd (KED) | 0.016 ppb             | 14.5 %            |
| 115In (KED) | 102.320 %             | 0.6 %             |
| 133Cs (KED) | 0.027 ppb             | 9.5 %             |
| 138Ba (KED) | 1.877 ppb             | 0.9 %             |
| 139La (KED) | 0.139 ppb             | 1.4 %             |
| 140Ce (KED) | 0.305 ppb             | 1.8 %             |
| 141Pr (KED) | 0.032 ppb             | 2.6 %             |
| 142Nd (KED) | 0.187 ppb             | 2.7 %             |
| 152Sm (KED) | 0.024 ppb             | 4.6 %             |
| 153Eu (KED) | 0.005 ppb             | 3.7 %             |
| 158Gd (KED) | 0.021 ppb             | 0.9 %             |
| 159Tb (KED) | 103.438 %             | 1.3 %             |
| 164Dy (KED) | 0.014 ppb             | 1.8 %             |
| 166Er (KED) | 0.006 ppb             | 11.7 %            |
| 169Tm (KED) | 0.001 ppb             | 8.0 %             |
| 174Yb (KED) | 0.005 ppb             | 3.0 %             |
| 175Lu (KED) | -0.109 ppb            | 1.4 %             |
| 205Tl (KED) | 0.004 ppb             | 7.3 %             |
| 208Pb (KED) | 0.310 ppb             | 0.2 %             |
| 209Bi (KED) | 97.744 %              | 0.3 %             |
| 232Th (KED) | 0.038 ppb             | 1.5 %             |
| 238U (KED)  | 0.009 ppb             | 0.5 %             |

| Category   | Concentration average | Intensity average | Intensity RSD |
|------------|-----------------------|-------------------|---------------|
| 6Li (KED)  | 108.201 %             | 3,314 cps         | 6.7 %         |
| 9Be (KED)  | 0.023 ppb             | 3 cps             | 100.0 %       |
| 11B (KED)  | 0.286 ppb             | 616 cps           | 1.9 %         |
| 24Mg (KED) | 87.604 ppb            | 55,006 cps        | 0.9 %         |
| 27Al (KED) | 141.458 ppb           | 21,639 cps        | 1.5 %         |

| Category    | Concentration average | Intensity average | Intensity RSD |
|-------------|-----------------------|-------------------|---------------|
| 45Sc (KED)  | 105.412 %             | 54,917 cps        | 0.6 %         |
| 51V (KED)   | 0.260 ppb             | 2,528 cps         | 3.0 %         |
| 52Cr (KED)  | 1.121 ppb             | 17,106 cps        | 0.6 %         |
| 55Mn (KED)  | 5.067 ppb             | 38,652 cps        | 1.7 %         |
| 56Fe (KED)  | 171.772 ppb           | 2,383,098 cps     | 0.8 %         |
| 58Ni (KED)  | 0.969 ppb             | 17,569 cps        | 1.1 %         |
| 59Co (KED)  | 0.073 ppb             | 2,199 cps         | 2.6 %         |
| 63Cu (KED)  | 2.561 ppb             | 56,473 cps        | 0.6 %         |
| 64Zn (KED)  | 47.860 ppb            | 224,657 cps       | 0.8 %         |
| 69Ga (KED)  | 0.559 ppb             | 4,050 cps         | 3.4 %         |
| 75As (KED)  | 0.120 ppb             | 187 cps           | 15.3 %        |
| 80Se (KED)  | 0.192 ppb             | 1,301 cps         | 3.7 %         |
| 85Rb (KED)  | 0.564 ppb             | 3,786 cps         | 7.0 %         |
| 88Sr (KED)  | 1.170 ppb             | 11,155 cps        | 1.0 %         |
| 89Y (KED)   | 103.760 %             | 499,130 cps       | 0.3 %         |
| 107Ag (KED) | 0.017 ppb             | 1,016 cps         | 10.1 %        |
| 114Cd (KED) | 0.016 ppb             | 318 cps           | 13.1 %        |
| 115In (KED) | 102.320 %             | 871,775 cps       | 0.6 %         |
| 133Cs (KED) | 0.027 ppb             | 856 cps           | 8.8 %         |
| 138Ba (KED) | 1.877 ppb             | 84,532 cps        | 1.1 %         |
| 139La (KED) | 0.139 ppb             | 13,342 cps        | 1.6 %         |
| 140Ce (KED) | 0.305 ppb             | 39,169 cps        | 2.4 %         |
| 141Pr (KED) | 0.032 ppb             | 4,304 cps         | 3.9 %         |
| 142Nd (KED) | 0.187 ppb             | 10,035 cps        | 3.4 %         |
| 152Sm (KED) | 0.024 ppb             | 1,185 cps         | 4.2 %         |
| 153Eu (KED) | 0.005 ppb             | 467 cps           | 4.7 %         |
| 158Gd (KED) | 0.021 ppb             | 1,393 cps         | 0.4 %         |
| 159Tb (KED) | 103.438 %             | 4,901,584 cps     | 1.3 %         |
| 164Dy (KED) | 0.014 ppb             | 1,057 cps         | 0.8 %         |
| 166Er (KED) | 0.006 ppb             | 953 cps           | 6.7 %         |
| 169Tm (KED) | 0.001 ppb             | 256 cps           | 8.9 %         |
| 174Yb (KED) | 0.005 ppb             | 569 cps           | 1.9 %         |
| 175Lu (KED) | -0.109 ppb            | 17,917 cps        | 2.6 %         |
| 205Tl (KED) | 0.004 ppb             | 766 cps           | 7.2 %         |
| 208Pb (KED) | 0.310 ppb             | 46,534 cps        | 0.3 %         |
| 209Bi (KED) | 97.744 %              | 3,481,376 cps     | 0.3 %         |
| 232Th (KED) | 0.038 ppb             | 10,507 cps        | 1.6 %         |
| 238U (KED)  | 0.009 ppb             | 2,927 cps         | 0.7 %         |

## Sample Summary

Instrument ID: iCAP Q

Analysis index: 24

Analysis name: 802133jian

Analysis started at: 10/28/2021 4:08:11 PM

User name: WINDOWS-UPCI4ER\Administrator

| Category    | Concentration average | Concentration RSD |
|-------------|-----------------------|-------------------|
| 6Li (KED)   | 106.096 %             | 1.4 %             |
| 9Be (KED)   | 0.000 ppb             |                   |
| 11B (KED)   | 4.461 ppb             | 21.4 %            |
| 24Mg (KED)  | 60.457 ppb            | 2.2 %             |
| 27Al (KED)  | 118.905 ppb           | 2.5 %             |
| 45Sc (KED)  | 103.718 %             | 0.2 %             |
| 51V (KED)   | 0.203 ppb             | 3.0 %             |
| 52Cr (KED)  | 0.701 ppb             | 1.6 %             |
| 55Mn (KED)  | 3.618 ppb             | 1.0 %             |
| 56Fe (KED)  | 104.047 ppb           | 0.9 %             |
| 58Ni (KED)  | 0.530 ppb             | 2.7 %             |
| 59Co (KED)  | 0.052 ppb             | 4.9 %             |
| 63Cu (KED)  | 1.723 ppb             | 0.6 %             |
| 64Zn (KED)  | 54.124 ppb            | 0.3 %             |
| 69Ga (KED)  | 0.400 ppb             | 4.1 %             |
| 75As (KED)  | 0.088 ppb             | 22.1 %            |
| 80Se (KED)  | 0.204 ppb             | 100.0 %           |
| 85Rb (KED)  | 0.291 ppb             | 3.3 %             |
| 88Sr (KED)  | 0.968 ppb             | 2.0 %             |
| 89Y (KED)   | 100.977 %             | 0.2 %             |
| 107Ag (KED) | 0.024 ppb             | 5.5 %             |
| 114Cd (KED) | 0.019 ppb             | 10.2 %            |
| 115In (KED) | 99.650 %              | 0.8 %             |
| 133Cs (KED) | 0.018 ppb             | 13.2 %            |
| 138Ba (KED) | 1.311 ppb             | 1.4 %             |
| 139La (KED) | 0.095 ppb             | 0.7 %             |
| 140Ce (KED) | 0.245 ppb             | 1.5 %             |
| 141Pr (KED) | 0.022 ppb             | 2.3 %             |
| 142Nd (KED) | 0.154 ppb             | 12.7 %            |
| 152Sm (KED) | 0.015 ppb             | 7.2 %             |
| 153Eu (KED) | 0.003 ppb             | 3.5 %             |
| 158Gd (KED) | 0.014 ppb             | 8.3 %             |
| 159Tb (KED) | 102.406 %             | 0.9 %             |
| 164Dy (KED) | 0.010 ppb             | 5.7 %             |
| 166Er (KED) | 0.004 ppb             | 12.5 %            |
| 169Tm (KED) | 0.001 ppb             | 2.0 %             |
| 174Yb (KED) | 0.004 ppb             | 8.9 %             |
| 175Lu (KED) | -0.110 ppb            | 3.8 %             |
| 205Tl (KED) | 0.002 ppb             | 9.3 %             |
| 208Pb (KED) | 0.269 ppb             | 1.4 %             |
| 209Bi (KED) | 96.663 %              | 0.4 %             |
| 232Th (KED) | 0.027 ppb             | 0.9 %             |
| 238U (KED)  | 0.007 ppb             | 3.6 %             |

| Category   | Concentration average | Intensity average | Intensity RSD |
|------------|-----------------------|-------------------|---------------|
| 6Li (KED)  | 106.096 %             | 3,249 cps         | 1.4 %         |
| 9Be (KED)  | 0.000 ppb             | 0 cps             |               |
| 11B (KED)  | 4.461 ppb             | 950 cps           | 7.4 %         |
| 24Mg (KED) | 60.457 ppb            | 37,375 cps        | 1.2 %         |
| 27Al (KED) | 118.905 ppb           | 17,908 cps        | 2.4 %         |

| Category    | Concentration average | Intensity average | Intensity RSD |
|-------------|-----------------------|-------------------|---------------|
| 45Sc (KED)  | 103.718 %             | 54,034 cps        | 0.2 %         |
| 51V (KED)   | 0.203 ppb             | 1,942 cps         | 3.1 %         |
| 52Cr (KED)  | 0.701 ppb             | 10,540 cps        | 1.6 %         |
| 55Mn (KED)  | 3.618 ppb             | 27,172 cps        | 0.8 %         |
| 56Fe (KED)  | 104.047 ppb           | 1,421,193 cps     | 1.2 %         |
| 58Ni (KED)  | 0.530 ppb             | 9,595 cps         | 2.8 %         |
| 59Co (KED)  | 0.052 ppb             | 1,552 cps         | 4.6 %         |
| 63Cu (KED)  | 1.723 ppb             | 37,643 cps        | 0.4 %         |
| 64Zn (KED)  | 54.124 ppb            | 246,977 cps       | 0.2 %         |
| 69Ga (KED)  | 0.400 ppb             | 2,833 cps         | 3.8 %         |
| 75As (KED)  | 0.088 ppb             | 136 cps           | 20.5 %        |
| 80Se (KED)  | 0.204 ppb             | 1,271 cps         | 7.0 %         |
| 85Rb (KED)  | 0.291 ppb             | 1,908 cps         | 3.4 %         |
| 88Sr (KED)  | 0.968 ppb             | 9,000 cps         | 1.8 %         |
| 89Y (KED)   | 100.977 %             | 485,742 cps       | 0.2 %         |
| 107Ag (KED) | 0.024 ppb             | 1,432 cps         | 4.7 %         |
| 114Cd (KED) | 0.019 ppb             | 350 cps           | 9.1 %         |
| 115In (KED) | 99.650 %              | 849,031 cps       | 0.8 %         |
| 133Cs (KED) | 0.018 ppb             | 576 cps           | 12.2 %        |
| 138Ba (KED) | 1.311 ppb             | 58,638 cps        | 1.4 %         |
| 139La (KED) | 0.095 ppb             | 9,021 cps         | 1.0 %         |
| 140Ce (KED) | 0.245 ppb             | 31,240 cps        | 1.2 %         |
| 141Pr (KED) | 0.022 ppb             | 2,963 cps         | 2.9 %         |
| 142Nd (KED) | 0.154 ppb             | 8,169 cps         | 13.0 %        |
| 152Sm (KED) | 0.015 ppb             | 740 cps           | 6.4 %         |
| 153Eu (KED) | 0.003 ppb             | 340 cps           | 2.6 %         |
| 158Gd (KED) | 0.014 ppb             | 923 cps           | 7.4 %         |
| 159Tb (KED) | 102.406 %             | 4,852,666 cps     | 0.9 %         |
| 164Dy (KED) | 0.010 ppb             | 771 cps           | 6.4 %         |
| 166Er (KED) | 0.004 ppb             | 832 cps           | 5.5 %         |
| 169Tm (KED) | 0.001 ppb             | 188 cps           | 1.0 %         |
| 174Yb (KED) | 0.004 ppb             | 416 cps           | 9.4 %         |
| 175Lu (KED) | -0.110 ppb            | 17,508 cps        | 4.1 %         |
| 205Tl (KED) | 0.002 ppb             | 494 cps           | 8.0 %         |
| 208Pb (KED) | 0.269 ppb             | 40,448 cps        | 1.3 %         |
| 209Bi (KED) | 96.663 %              | 3,442,845 cps     | 0.4 %         |
| 232Th (KED) | 0.027 ppb             | 7,281 cps         | 1.3 %         |
| 238U (KED)  | 0.007 ppb             | 2,186 cps         | 3.9 %         |

## Sample Summary

Instrument ID: iCAP Q

Analysis index: 25

Analysis name: 80036jian

Analysis started at: 10/28/2021 4:11:22 PM

User name: WINDOWS-UPCI4ER\Administrator

| Category    | Concentration average | Concentration RSD |
|-------------|-----------------------|-------------------|
| 6Li (KED)   | 107.984 %             | 6.0 %             |
| 9Be (KED)   | 0.008 ppb             | 173.2 %           |
| 11B (KED)   | 8.998 ppb             | 6.8 %             |
| 24Mg (KED)  | 72.243 ppb            | 5.4 %             |
| 27Al (KED)  | 116.214 ppb           | 1.6 %             |
| 45Sc (KED)  | 103.810 %             | 1.1 %             |
| 51V (KED)   | 0.213 ppb             | 0.5 %             |
| 52Cr (KED)  | 0.802 ppb             | 0.5 %             |
| 55Mn (KED)  | 4.210 ppb             | 2.7 %             |
| 56Fe (KED)  | 138.504 ppb           | 1.4 %             |
| 58Ni (KED)  | 0.795 ppb             | 1.7 %             |
| 59Co (KED)  | 0.070 ppb             | 4.7 %             |
| 63Cu (KED)  | 2.538 ppb             | 0.7 %             |
| 64Zn (KED)  | 57.648 ppb            | 0.5 %             |
| 69Ga (KED)  | 0.439 ppb             | 3.9 %             |
| 75As (KED)  | 0.120 ppb             | 8.5 %             |
| 80Se (KED)  | 0.128 ppb             | 50.4 %            |
| 85Rb (KED)  | 0.455 ppb             | 1.7 %             |
| 88Sr (KED)  | 0.992 ppb             | 1.4 %             |
| 89Y (KED)   | 102.483 %             | 1.3 %             |
| 107Ag (KED) | 0.016 ppb             | 5.1 %             |
| 114Cd (KED) | 0.017 ppb             | 7.0 %             |
| 115In (KED) | 99.563 %              | 0.4 %             |
| 133Cs (KED) | 0.026 ppb             | 1.8 %             |
| 138Ba (KED) | 1.481 ppb             | 0.9 %             |
| 139La (KED) | 0.138 ppb             | 1.6 %             |
| 140Ce (KED) | 0.301 ppb             | 2.3 %             |
| 141Pr (KED) | 0.032 ppb             | 1.4 %             |
| 142Nd (KED) | 0.179 ppb             | 1.9 %             |
| 152Sm (KED) | 0.021 ppb             | 8.5 %             |
| 153Eu (KED) | 0.004 ppb             | 5.8 %             |
| 158Gd (KED) | 0.018 ppb             | 6.0 %             |
| 159Tb (KED) | 101.450 %             | 0.5 %             |
| 164Dy (KED) | 0.012 ppb             | 11.3 %            |
| 166Er (KED) | 0.004 ppb             | 18.1 %            |
| 169Tm (KED) | 0.001 ppb             | 13.5 %            |
| 174Yb (KED) | 0.005 ppb             | 1.9 %             |
| 175Lu (KED) | -0.109 ppb            | 1.2 %             |
| 205Tl (KED) | 0.003 ppb             | 4.2 %             |
| 208Pb (KED) | 0.291 ppb             | 1.8 %             |
| 209Bi (KED) | 97.308 %              | 0.5 %             |
| 232Th (KED) | 0.043 ppb             | 2.7 %             |
| 238U (KED)  | 0.008 ppb             | 5.1 %             |

| Category   | Concentration average | Intensity average | Intensity RSD |
|------------|-----------------------|-------------------|---------------|
| 6Li (KED)  | 107.984 %             | 3,307 cps         | 6.0 %         |
| 9Be (KED)  | 0.008 ppb             | 1 cps             | 173.2 %       |
| 11B (KED)  | 8.998 ppb             | 1,350 cps         | 8.1 %         |
| 24Mg (KED) | 72.243 ppb            | 45,335 cps        | 0.6 %         |
| 27Al (KED) | 116.214 ppb           | 17,519 cps        | 0.5 %         |

| Category    | Concentration average | Intensity average | Intensity RSD |
|-------------|-----------------------|-------------------|---------------|
| 45Sc (KED)  | 103.810 %             | 54,082 cps        | 1.1 %         |
| 51V (KED)   | 0.213 ppb             | 2,042 cps         | 0.7 %         |
| 52Cr (KED)  | 0.802 ppb             | 12,068 cps        | 1.3 %         |
| 55Mn (KED)  | 4.210 ppb             | 31,633 cps        | 2.9 %         |
| 56Fe (KED)  | 138.504 ppb           | 1,892,679 cps     | 1.1 %         |
| 58Ni (KED)  | 0.795 ppb             | 14,257 cps        | 2.4 %         |
| 59Co (KED)  | 0.070 ppb             | 2,067 cps         | 3.9 %         |
| 63Cu (KED)  | 2.538 ppb             | 55,291 cps        | 0.8 %         |
| 64Zn (KED)  | 57.648 ppb            | 266,837 cps       | 0.9 %         |
| 69Ga (KED)  | 0.439 ppb             | 3,149 cps         | 3.0 %         |
| 75As (KED)  | 0.120 ppb             | 184 cps           | 9.3 %         |
| 80Se (KED)  | 0.128 ppb             | 1,258 cps         | 3.5 %         |
| 85Rb (KED)  | 0.455 ppb             | 3,018 cps         | 0.8 %         |
| 88Sr (KED)  | 0.992 ppb             | 9,355 cps         | 2.2 %         |
| 89Y (KED)   | 102.483 %             | 492,987 cps       | 1.3 %         |
| 107Ag (KED) | 0.016 ppb             | 972 cps           | 4.6 %         |
| 114Cd (KED) | 0.017 ppb             | 327 cps           | 6.7 %         |
| 115In (KED) | 99.563 %              | 848,286 cps       | 0.4 %         |
| 133Cs (KED) | 0.026 ppb             | 804 cps           | 1.3 %         |
| 138Ba (KED) | 1.481 ppb             | 65,526 cps        | 0.4 %         |
| 139La (KED) | 0.138 ppb             | 12,982 cps        | 2.1 %         |
| 140Ce (KED) | 0.301 ppb             | 38,005 cps        | 2.0 %         |
| 141Pr (KED) | 0.032 ppb             | 4,173 cps         | 1.6 %         |
| 142Nd (KED) | 0.179 ppb             | 9,406 cps         | 2.4 %         |
| 152Sm (KED) | 0.021 ppb             | 1,029 cps         | 8.5 %         |
| 153Eu (KED) | 0.004 ppb             | 360 cps           | 5.6 %         |
| 158Gd (KED) | 0.018 ppb             | 1,201 cps         | 6.5 %         |
| 159Tb (KED) | 101.450 %             | 4,807,390 cps     | 0.5 %         |
| 164Dy (KED) | 0.012 ppb             | 890 cps           | 11.2 %        |
| 166Er (KED) | 0.004 ppb             | 782 cps           | 7.1 %         |
| 169Tm (KED) | 0.001 ppb             | 211 cps           | 12.7 %        |
| 174Yb (KED) | 0.005 ppb             | 521 cps           | 1.3 %         |
| 175Lu (KED) | -0.109 ppb            | 17,554 cps        | 0.9 %         |
| 205Tl (KED) | 0.003 ppb             | 593 cps           | 3.5 %         |
| 208Pb (KED) | 0.291 ppb             | 43,740 cps        | 1.2 %         |
| 209Bi (KED) | 97.308 %              | 3,465,842 cps     | 0.5 %         |
| 232Th (KED) | 0.043 ppb             | 11,687 cps        | 2.2 %         |
| 238U (KED)  | 0.008 ppb             | 2,504 cps         | 5.2 %         |

## Sample Summary

Instrument ID: iCAP Q

Analysis index: 26

Analysis name: 802158jian

Analysis started at: 10/28/2021 4:14:33 PM

User name: WINDOWS-UPCI4ER\Administrator

| Category    | Concentration average | Concentration RSD |
|-------------|-----------------------|-------------------|
| 6Li (KED)   | 103.701 %             | 2.5 %             |
| 9Be (KED)   | 0.000 ppb             |                   |
| 11B (KED)   | 14.517 ppb            | 5.1 %             |
| 24Mg (KED)  | 155.440 ppb           | 2.7 %             |
| 27Al (KED)  | 234.822 ppb           | 1.1 %             |
| 45Sc (KED)  | 106.293 %             | 1.3 %             |
| 51V (KED)   | 0.460 ppb             | 1.0 %             |
| 52Cr (KED)  | 0.939 ppb             | 0.1 %             |
| 55Mn (KED)  | 6.356 ppb             | 2.1 %             |
| 56Fe (KED)  | 259.032 ppb           | 0.9 %             |
| 58Ni (KED)  | 1.214 ppb             | 0.9 %             |
| 59Co (KED)  | 0.119 ppb             | 3.2 %             |
| 63Cu (KED)  | 2.311 ppb             | 1.1 %             |
| 64Zn (KED)  | 58.107 ppb            | 1.5 %             |
| 69Ga (KED)  | 0.786 ppb             | 3.4 %             |
| 75As (KED)  | 0.153 ppb             | 1.9 %             |
| 80Se (KED)  | 0.247 ppb             | 32.5 %            |
| 85Rb (KED)  | 0.865 ppb             | 2.0 %             |
| 88Sr (KED)  | 1.564 ppb             | 2.5 %             |
| 89Y (KED)   | 103.743 %             | 1.2 %             |
| 107Ag (KED) | 0.017 ppb             | 1.1 %             |
| 114Cd (KED) | 0.013 ppb             | 10.9 %            |
| 115In (KED) | 101.885 %             | 0.3 %             |
| 133Cs (KED) | 0.049 ppb             | 3.4 %             |
| 138Ba (KED) | 2.650 ppb             | 0.7 %             |
| 139La (KED) | 0.225 ppb             | 1.0 %             |
| 140Ce (KED) | 0.465 ppb             | 0.8 %             |
| 141Pr (KED) | 0.054 ppb             | 2.2 %             |
| 142Nd (KED) | 0.288 ppb             | 3.5 %             |
| 152Sm (KED) | 0.040 ppb             | 3.9 %             |
| 153Eu (KED) | 0.008 ppb             | 3.6 %             |
| 158Gd (KED) | 0.035 ppb             | 3.3 %             |
| 159Tb (KED) | 104.506 %             | 1.0 %             |
| 164Dy (KED) | 0.024 ppb             | 2.9 %             |
| 166Er (KED) | 0.010 ppb             | 6.4 %             |
| 169Tm (KED) | 0.002 ppb             | 2.4 %             |
| 174Yb (KED) | 0.009 ppb             | 2.2 %             |
| 175Lu (KED) | -0.107 ppb            | 2.3 %             |
| 205Tl (KED) | 0.006 ppb             | 1.6 %             |
| 208Pb (KED) | 0.503 ppb             | 1.1 %             |
| 209Bi (KED) | 98.561 %              | 0.9 %             |
| 232Th (KED) | 0.062 ppb             | 0.2 %             |
| 238U (KED)  | 0.014 ppb             | 3.3 %             |

| Category   | Concentration average | Intensity average | Intensity RSD |
|------------|-----------------------|-------------------|---------------|
| 6Li (KED)  | 103.701 %             | 3,176 cps         | 2.5 %         |
| 9Be (KED)  | 0.000 ppb             | 0 cps             |               |
| 11B (KED)  | 14.517 ppb            | 1,742 cps         | 4.6 %         |
| 24Mg (KED) | 155.440 ppb           | 93,677 cps        | 0.4 %         |
| 27Al (KED) | 234.822 ppb           | 36,161 cps        | 0.3 %         |

| Category    | Concentration average | Intensity average | Intensity RSD |
|-------------|-----------------------|-------------------|---------------|
| 45Sc (KED)  | 106.293 %             | 55,376 cps        | 1.3 %         |
| 51V (KED)   | 0.460 ppb             | 4,519 cps         | 0.3 %         |
| 52Cr (KED)  | 0.939 ppb             | 14,465 cps        | 1.2 %         |
| 55Mn (KED)  | 6.356 ppb             | 48,870 cps        | 1.1 %         |
| 56Fe (KED)  | 259.032 ppb           | 3,622,475 cps     | 0.4 %         |
| 58Ni (KED)  | 1.214 ppb             | 22,131 cps        | 0.4 %         |
| 59Co (KED)  | 0.119 ppb             | 3,583 cps         | 2.1 %         |
| 63Cu (KED)  | 2.311 ppb             | 51,157 cps        | 1.6 %         |
| 64Zn (KED)  | 58.107 ppb            | 272,233 cps       | 0.4 %         |
| 69Ga (KED)  | 0.786 ppb             | 5,679 cps         | 2.1 %         |
| 75As (KED)  | 0.153 ppb             | 233 cps           | 1.4 %         |
| 80Se (KED)  | 0.247 ppb             | 1,325 cps         | 1.5 %         |
| 85Rb (KED)  | 0.865 ppb             | 5,801 cps         | 2.3 %         |
| 88Sr (KED)  | 1.564 ppb             | 14,879 cps        | 1.7 %         |
| 89Y (KED)   | 103.743 %             | 499,046 cps       | 1.2 %         |
| 107Ag (KED) | 0.017 ppb             | 1,041 cps         | 0.8 %         |
| 114Cd (KED) | 0.013 ppb             | 253 cps           | 9.9 %         |
| 115In (KED) | 101.885 %             | 868,068 cps       | 0.3 %         |
| 133Cs (KED) | 0.049 ppb             | 1,550 cps         | 3.4 %         |
| 138Ba (KED) | 2.650 ppb             | 120,274 cps       | 0.3 %         |
| 139La (KED) | 0.225 ppb             | 21,792 cps        | 0.2 %         |
| 140Ce (KED) | 0.465 ppb             | 60,352 cps        | 0.3 %         |
| 141Pr (KED) | 0.054 ppb             | 7,323 cps         | 2.7 %         |
| 142Nd (KED) | 0.288 ppb             | 15,602 cps        | 2.8 %         |
| 152Sm (KED) | 0.040 ppb             | 1,991 cps         | 3.8 %         |
| 153Eu (KED) | 0.008 ppb             | 801 cps           | 2.6 %         |
| 158Gd (KED) | 0.035 ppb             | 2,319 cps         | 4.2 %         |
| 159Tb (KED) | 104.506 %             | 4,952,201 cps     | 1.0 %         |
| 164Dy (KED) | 0.024 ppb             | 1,842 cps         | 2.0 %         |
| 166Er (KED) | 0.010 ppb             | 1,381 cps         | 3.6 %         |
| 169Tm (KED) | 0.002 ppb             | 524 cps           | 3.3 %         |
| 174Yb (KED) | 0.009 ppb             | 1,004 cps         | 1.3 %         |
| 175Lu (KED) | -0.107 ppb            | 18,307 cps        | 1.5 %         |
| 205Tl (KED) | 0.006 ppb             | 1,163 cps         | 2.4 %         |
| 208Pb (KED) | 0.503 ppb             | 73,566 cps        | 2.0 %         |
| 209Bi (KED) | 98.561 %              | 3,510,446 cps     | 0.9 %         |
| 232Th (KED) | 0.062 ppb             | 16,958 cps        | 1.0 %         |
| 238U (KED)  | 0.014 ppb             | 4,641 cps         | 2.6 %         |

## Sample Summary

Instrument ID: iCAP Q

Analysis index: 27

Analysis name: 80075jian

Analysis started at: 10/28/2021 4:17:47 PM

User name: WINDOWS-UPCI4ER\Administrator

| Category    | Concentration average | Concentration RSD |
|-------------|-----------------------|-------------------|
| 6Li (KED)   | 106.750 %             | 3.5 %             |
| 9Be (KED)   | 0.000 ppb             |                   |
| 11B (KED)   | 6.960 ppb             | 8.5 %             |
| 24Mg (KED)  | 84.465 ppb            | 2.5 %             |
| 27Al (KED)  | 143.851 ppb           | 0.4 %             |
| 45Sc (KED)  | 105.772 %             | 0.6 %             |
| 51V (KED)   | 0.269 ppb             | 0.4 %             |
| 52Cr (KED)  | 0.971 ppb             | 0.2 %             |
| 55Mn (KED)  | 4.598 ppb             | 2.4 %             |
| 56Fe (KED)  | 141.558 ppb           | 0.5 %             |
| 58Ni (KED)  | 0.676 ppb             | 2.7 %             |
| 59Co (KED)  | 0.075 ppb             | 1.6 %             |
| 63Cu (KED)  | 2.185 ppb             | 1.4 %             |
| 64Zn (KED)  | 52.900 ppb            | 2.1 %             |
| 69Ga (KED)  | 0.488 ppb             | 4.4 %             |
| 75As (KED)  | 0.121 ppb             | 12.7 %            |
| 80Se (KED)  | 0.333 ppb             | 58.3 %            |
| 85Rb (KED)  | 0.515 ppb             | 6.3 %             |
| 88Sr (KED)  | 1.582 ppb             | 1.8 %             |
| 89Y (KED)   | 102.295 %             | 1.7 %             |
| 107Ag (KED) | 0.012 ppb             | 9.0 %             |
| 114Cd (KED) | 0.021 ppb             | 4.8 %             |
| 115In (KED) | 101.376 %             | 0.8 %             |
| 133Cs (KED) | 0.028 ppb             | 12.9 %            |
| 138Ba (KED) | 1.648 ppb             | 1.0 %             |
| 139La (KED) | 0.111 ppb             | 3.6 %             |
| 140Ce (KED) | 0.240 ppb             | 1.7 %             |
| 141Pr (KED) | 0.027 ppb             | 1.1 %             |
| 142Nd (KED) | 0.151 ppb             | 5.0 %             |
| 152Sm (KED) | 0.020 ppb             | 3.6 %             |
| 153Eu (KED) | 0.004 ppb             | 11.0 %            |
| 158Gd (KED) | 0.018 ppb             | 3.0 %             |
| 159Tb (KED) | 102.701 %             | 0.5 %             |
| 164Dy (KED) | 0.013 ppb             | 2.2 %             |
| 166Er (KED) | 0.005 ppb             | 16.5 %            |
| 169Tm (KED) | 0.001 ppb             | 21.8 %            |
| 174Yb (KED) | 0.006 ppb             | 9.5 %             |
| 175Lu (KED) | -0.108 ppb            | 1.3 %             |
| 205Tl (KED) | 0.003 ppb             | 11.3 %            |
| 208Pb (KED) | 0.238 ppb             | 0.9 %             |
| 209Bi (KED) | 98.816 %              | 1.1 %             |
| 232Th (KED) | 0.033 ppb             | 2.6 %             |
| 238U (KED)  | 0.008 ppb             | 1.8 %             |

| Category   | Concentration average | Intensity average | Intensity RSD |
|------------|-----------------------|-------------------|---------------|
| 6Li (KED)  | 106.750 %             | 3,269 cps         | 3.5 %         |
| 9Be (KED)  | 0.000 ppb             | 0 cps             |               |
| 11B (KED)  | 6.960 ppb             | 1,166 cps         | 7.7 %         |
| 24Mg (KED) | 84.465 ppb            | 52,458 cps        | 1.1 %         |
| 27Al (KED) | 143.851 ppb           | 22,077 cps        | 0.2 %         |

| Category    | Concentration average | Intensity average | Intensity RSD |
|-------------|-----------------------|-------------------|---------------|
| 45Sc (KED)  | 105.772 %             | 55,105 cps        | 0.6 %         |
| 51V (KED)   | 0.269 ppb             | 2,631 cps         | 1.0 %         |
| 52Cr (KED)  | 0.971 ppb             | 14,881 cps        | 0.8 %         |
| 55Mn (KED)  | 4.598 ppb             | 35,201 cps        | 1.8 %         |
| 56Fe (KED)  | 141.558 ppb           | 1,971,024 cps     | 0.5 %         |
| 58Ni (KED)  | 0.676 ppb             | 12,384 cps        | 2.6 %         |
| 59Co (KED)  | 0.075 ppb             | 2,265 cps         | 2.1 %         |
| 63Cu (KED)  | 2.185 ppb             | 47,787 cps        | 0.4 %         |
| 64Zn (KED)  | 52.900 ppb            | 244,535 cps       | 0.5 %         |
| 69Ga (KED)  | 0.488 ppb             | 3,487 cps         | 3.1 %         |
| 75As (KED)  | 0.121 ppb             | 186 cps           | 12.2 %        |
| 80Se (KED)  | 0.333 ppb             | 1,342 cps         | 5.0 %         |
| 85Rb (KED)  | 0.515 ppb             | 3,407 cps         | 5.2 %         |
| 88Sr (KED)  | 1.582 ppb             | 14,842 cps        | 1.2 %         |
| 89Y (KED)   | 102.295 %             | 492,083 cps       | 1.7 %         |
| 107Ag (KED) | 0.012 ppb             | 748 cps           | 9.1 %         |
| 114Cd (KED) | 0.021 ppb             | 396 cps           | 5.1 %         |
| 115In (KED) | 101.376 %             | 863,734 cps       | 0.8 %         |
| 133Cs (KED) | 0.028 ppb             | 872 cps           | 12.0 %        |
| 138Ba (KED) | 1.648 ppb             | 73,750 cps        | 0.7 %         |
| 139La (KED) | 0.111 ppb             | 10,597 cps        | 3.5 %         |
| 140Ce (KED) | 0.240 ppb             | 30,614 cps        | 1.3 %         |
| 141Pr (KED) | 0.027 ppb             | 3,614 cps         | 0.8 %         |
| 142Nd (KED) | 0.151 ppb             | 8,045 cps         | 4.7 %         |
| 152Sm (KED) | 0.020 ppb             | 980 cps           | 3.2 %         |
| 153Eu (KED) | 0.004 ppb             | 387 cps           | 11.0 %        |
| 158Gd (KED) | 0.018 ppb             | 1,168 cps         | 2.8 %         |
| 159Tb (KED) | 102.701 %             | 4,866,670 cps     | 0.5 %         |
| 164Dy (KED) | 0.013 ppb             | 997 cps           | 2.6 %         |
| 166Er (KED) | 0.005 ppb             | 921 cps           | 8.3 %         |
| 169Tm (KED) | 0.001 ppb             | 280 cps           | 20.7 %        |
| 174Yb (KED) | 0.006 ppb             | 611 cps           | 9.6 %         |
| 175Lu (KED) | -0.108 ppb            | 17,942 cps        | 1.2 %         |
| 205Tl (KED) | 0.003 ppb             | 717 cps           | 9.6 %         |
| 208Pb (KED) | 0.238 ppb             | 37,068 cps        | 0.6 %         |
| 209Bi (KED) | 98.816 %              | 3,519,542 cps     | 1.1 %         |
| 232Th (KED) | 0.033 ppb             | 9,153 cps         | 1.8 %         |
| 238U (KED)  | 0.008 ppb             | 2,817 cps         | 2.9 %         |

## Sample Summary

Instrument ID: iCAP Q

Analysis index: 28

Analysis name: 803244jian

Analysis started at: 10/28/2021 4:20:58 PM

User name: WINDOWS-UPCI4ER\Administrator

| Category    | Concentration average | Concentration RSD |
|-------------|-----------------------|-------------------|
| 6Li (KED)   | 108.746 %             | 4.7 %             |
| 9Be (KED)   | 0.000 ppb             |                   |
| 11B (KED)   | 12.432 ppb            | 7.2 %             |
| 24Mg (KED)  | 115.398 ppb           | 4.0 %             |
| 27Al (KED)  | 193.617 ppb           | 0.6 %             |
| 45Sc (KED)  | 106.460 %             | 0.3 %             |
| 51V (KED)   | 0.351 ppb             | 1.4 %             |
| 52Cr (KED)  | 1.241 ppb             | 2.1 %             |
| 55Mn (KED)  | 6.909 ppb             | 1.5 %             |
| 56Fe (KED)  | 201.009 ppb           | 0.2 %             |
| 58Ni (KED)  | 1.318 ppb             | 1.2 %             |
| 59Co (KED)  | 0.110 ppb             | 3.8 %             |
| 63Cu (KED)  | 2.475 ppb             | 1.2 %             |
| 64Zn (KED)  | 70.461 ppb            | 0.7 %             |
| 69Ga (KED)  | 0.706 ppb             | 1.9 %             |
| 75As (KED)  | 0.186 ppb             | 14.9 %            |
| 80Se (KED)  | 0.328 ppb             | 60.9 %            |
| 85Rb (KED)  | 0.598 ppb             | 2.3 %             |
| 88Sr (KED)  | 1.977 ppb             | 4.2 %             |
| 89Y (KED)   | 104.286 %             | 1.5 %             |
| 107Ag (KED) | 0.011 ppb             | 14.3 %            |
| 114Cd (KED) | 0.023 ppb             | 1.9 %             |
| 115In (KED) | 103.140 %             | 1.3 %             |
| 133Cs (KED) | 0.037 ppb             | 10.8 %            |
| 138Ba (KED) | 2.435 ppb             | 1.7 %             |
| 139La (KED) | 0.196 ppb             | 0.5 %             |
| 140Ce (KED) | 0.412 ppb             | 2.8 %             |
| 141Pr (KED) | 0.046 ppb             | 1.2 %             |
| 142Nd (KED) | 0.249 ppb             | 2.3 %             |
| 152Sm (KED) | 0.033 ppb             | 6.0 %             |
| 153Eu (KED) | 0.007 ppb             | 3.2 %             |
| 158Gd (KED) | 0.029 ppb             | 1.5 %             |
| 159Tb (KED) | 103.783 %             | 0.3 %             |
| 164Dy (KED) | 0.021 ppb             | 6.0 %             |
| 166Er (KED) | 0.008 ppb             | 9.9 %             |
| 169Tm (KED) | 0.001 ppb             | 5.6 %             |
| 174Yb (KED) | 0.009 ppb             | 5.4 %             |
| 175Lu (KED) | -0.109 ppb            | 3.2 %             |
| 205Tl (KED) | 0.005 ppb             | 7.4 %             |
| 208Pb (KED) | 0.853 ppb             | 1.7 %             |
| 209Bi (KED) | 98.855 %              | 1.2 %             |
| 232Th (KED) | 0.055 ppb             | 2.1 %             |
| 238U (KED)  | 0.015 ppb             | 2.5 %             |

| Category   | Concentration average | Intensity average | Intensity RSD |
|------------|-----------------------|-------------------|---------------|
| 6Li (KED)  | 108.746 %             | 3,330 cps         | 4.7 %         |
| 9Be (KED)  | 0.000 ppb             | 0 cps             |               |
| 11B (KED)  | 12.432 ppb            | 1,648 cps         | 2.0 %         |
| 24Mg (KED) | 115.398 ppb           | 72,911 cps        | 1.5 %         |
| 27Al (KED) | 193.617 ppb           | 29,880 cps        | 0.9 %         |

| Category    | Concentration average | Intensity average | Intensity RSD |
|-------------|-----------------------|-------------------|---------------|
| 45Sc (KED)  | 106.460 %             | 55,463 cps        | 0.3 %         |
| 51V (KED)   | 0.351 ppb             | 3,448 cps         | 1.5 %         |
| 52Cr (KED)  | 1.241 ppb             | 19,125 cps        | 1.7 %         |
| 55Mn (KED)  | 6.909 ppb             | 53,214 cps        | 1.3 %         |
| 56Fe (KED)  | 201.009 ppb           | 2,816,148 cps     | 0.4 %         |
| 58Ni (KED)  | 1.318 ppb             | 24,043 cps        | 1.4 %         |
| 59Co (KED)  | 0.110 ppb             | 3,319 cps         | 3.7 %         |
| 63Cu (KED)  | 2.475 ppb             | 54,910 cps        | 1.6 %         |
| 64Zn (KED)  | 70.461 ppb            | 331,405 cps       | 0.8 %         |
| 69Ga (KED)  | 0.706 ppb             | 5,129 cps         | 1.3 %         |
| 75As (KED)  | 0.186 ppb             | 284 cps           | 15.7 %        |
| 80Se (KED)  | 0.328 ppb             | 1,367 cps         | 6.0 %         |
| 85Rb (KED)  | 0.598 ppb             | 4,040 cps         | 3.4 %         |
| 88Sr (KED)  | 1.977 ppb             | 18,883 cps        | 3.4 %         |
| 89Y (KED)   | 104.286 %             | 501,660 cps       | 1.5 %         |
| 107Ag (KED) | 0.011 ppb             | 679 cps           | 15.0 %        |
| 114Cd (KED) | 0.023 ppb             | 437 cps           | 0.8 %         |
| 115In (KED) | 103.140 %             | 878,768 cps       | 1.3 %         |
| 133Cs (KED) | 0.037 ppb             | 1,187 cps         | 10.0 %        |
| 138Ba (KED) | 2.435 ppb             | 109,806 cps       | 1.5 %         |
| 139La (KED) | 0.196 ppb             | 18,885 cps        | 0.4 %         |
| 140Ce (KED) | 0.412 ppb             | 53,079 cps        | 2.6 %         |
| 141Pr (KED) | 0.046 ppb             | 6,193 cps         | 0.9 %         |
| 142Nd (KED) | 0.249 ppb             | 13,398 cps        | 2.6 %         |
| 152Sm (KED) | 0.033 ppb             | 1,619 cps         | 5.6 %         |
| 153Eu (KED) | 0.007 ppb             | 659 cps           | 3.0 %         |
| 158Gd (KED) | 0.029 ppb             | 1,953 cps         | 1.7 %         |
| 159Tb (KED) | 103.783 %             | 4,917,921 cps     | 0.3 %         |
| 164Dy (KED) | 0.021 ppb             | 1,608 cps         | 5.6 %         |
| 166Er (KED) | 0.008 ppb             | 1,189 cps         | 6.2 %         |
| 169Tm (KED) | 0.001 ppb             | 444 cps           | 5.6 %         |
| 174Yb (KED) | 0.009 ppb             | 973 cps           | 5.6 %         |
| 175Lu (KED) | -0.109 ppb            | 17,857 cps        | 3.8 %         |
| 205Tl (KED) | 0.005 ppb             | 1,023 cps         | 5.9 %         |
| 208Pb (KED) | 0.853 ppb             | 122,232 cps       | 0.6 %         |
| 209Bi (KED) | 98.855 %              | 3,520,935 cps     | 1.2 %         |
| 232Th (KED) | 0.055 ppb             | 15,279 cps        | 2.0 %         |
| 238U (KED)  | 0.015 ppb             | 4,910 cps         | 2.2 %         |

## Sample Summary

Instrument ID: iCAP Q

Analysis index: 29

Analysis name: 805028jian

Analysis started at: 10/28/2021 4:24:13 PM

User name: WINDOWS-UPCI4ER\Administrator

| Category    | Concentration average | Concentration RSD |
|-------------|-----------------------|-------------------|
| 6Li (KED)   | 112.084 %             | 3.1 %             |
| 9Be (KED)   | 0.007 ppb             | 173.2 %           |
| 11B (KED)   | -1.227 ppb            | 37.5 %            |
| 24Mg (KED)  | 118.508 ppb           | 2.3 %             |
| 27Al (KED)  | 146.857 ppb           | 1.1 %             |
| 45Sc (KED)  | 105.299 %             | 0.9 %             |
| 51V (KED)   | 0.283 ppb             | 2.8 %             |
| 52Cr (KED)  | 0.680 ppb             | 3.7 %             |
| 55Mn (KED)  | 5.803 ppb             | 0.7 %             |
| 56Fe (KED)  | 166.320 ppb           | 1.6 %             |
| 58Ni (KED)  | 1.176 ppb             | 1.3 %             |
| 59Co (KED)  | 0.095 ppb             | 4.2 %             |
| 63Cu (KED)  | 2.899 ppb             | 3.0 %             |
| 64Zn (KED)  | 60.358 ppb            | 0.5 %             |
| 69Ga (KED)  | 0.749 ppb             | 4.0 %             |
| 75As (KED)  | 0.140 ppb             | 15.9 %            |
| 80Se (KED)  | 0.185 ppb             | 101.1 %           |
| 85Rb (KED)  | 0.843 ppb             | 3.5 %             |
| 88Sr (KED)  | 1.788 ppb             | 1.5 %             |
| 89Y (KED)   | 104.235 %             | 1.7 %             |
| 107Ag (KED) | 0.031 ppb             | 2.4 %             |
| 114Cd (KED) | 0.023 ppb             | 11.3 %            |
| 115In (KED) | 100.885 %             | 1.6 %             |
| 133Cs (KED) | 0.031 ppb             | 4.5 %             |
| 138Ba (KED) | 2.533 ppb             | 1.3 %             |
| 139La (KED) | 0.164 ppb             | 0.8 %             |
| 140Ce (KED) | 0.332 ppb             | 1.7 %             |
| 141Pr (KED) | 0.038 ppb             | 1.8 %             |
| 142Nd (KED) | 0.204 ppb             | 4.3 %             |
| 152Sm (KED) | 0.027 ppb             | 5.5 %             |
| 153Eu (KED) | 0.006 ppb             | 9.2 %             |
| 158Gd (KED) | 0.022 ppb             | 2.7 %             |
| 159Tb (KED) | 103.651 %             | 1.1 %             |
| 164Dy (KED) | 0.015 ppb             | 2.5 %             |
| 166Er (KED) | 0.005 ppb             | 12.3 %            |
| 169Tm (KED) | 0.001 ppb             | 8.2 %             |
| 174Yb (KED) | 0.006 ppb             | 2.7 %             |
| 175Lu (KED) | -0.105 ppb            | 1.8 %             |
| 205Tl (KED) | 0.005 ppb             | 4.3 %             |
| 208Pb (KED) | 0.659 ppb             | 1.7 %             |
| 209Bi (KED) | 97.673 %              | 0.4 %             |
| 232Th (KED) | 0.042 ppb             | 2.3 %             |
| 238U (KED)  | 0.010 ppb             | 3.9 %             |

| Category   | Concentration average | Intensity average | Intensity RSD |
|------------|-----------------------|-------------------|---------------|
| 6Li (KED)  | 112.084 %             | 3,433 cps         | 3.1 %         |
| 9Be (KED)  | 0.007 ppb             | 1 cps             | 173.2 %       |
| 11B (KED)  | -1.227 ppb            | 508 cps           | 10.6 %        |
| 24Mg (KED) | 118.508 ppb           | 77,232 cps        | 1.8 %         |
| 27Al (KED) | 146.857 ppb           | 22,438 cps        | 2.0 %         |

| Category    | Concentration average | Intensity average | Intensity RSD |
|-------------|-----------------------|-------------------|---------------|
| 45Sc (KED)  | 105.299 %             | 54,858 cps        | 0.9 %         |
| 51V (KED)   | 0.283 ppb             | 2,751 cps         | 2.1 %         |
| 52Cr (KED)  | 0.680 ppb             | 10,384 cps        | 3.5 %         |
| 55Mn (KED)  | 5.803 ppb             | 44,218 cps        | 1.3 %         |
| 56Fe (KED)  | 166.320 ppb           | 2,305,090 cps     | 1.8 %         |
| 58Ni (KED)  | 1.176 ppb             | 21,237 cps        | 0.4 %         |
| 59Co (KED)  | 0.095 ppb             | 2,859 cps         | 4.8 %         |
| 63Cu (KED)  | 2.899 ppb             | 63,905 cps        | 1.6 %         |
| 64Zn (KED)  | 60.358 ppb            | 284,063 cps       | 1.6 %         |
| 69Ga (KED)  | 0.749 ppb             | 5,435 cps         | 2.9 %         |
| 75As (KED)  | 0.140 ppb             | 216 cps           | 14.0 %        |
| 80Se (KED)  | 0.185 ppb             | 1,305 cps         | 7.2 %         |
| 85Rb (KED)  | 0.843 ppb             | 5,686 cps         | 5.1 %         |
| 88Sr (KED)  | 1.788 ppb             | 17,075 cps        | 0.5 %         |
| 89Y (KED)   | 104.235 %             | 501,414 cps       | 1.7 %         |
| 107Ag (KED) | 0.031 ppb             | 1,816 cps         | 4.0 %         |
| 114Cd (KED) | 0.023 ppb             | 440 cps           | 12.5 %        |
| 115In (KED) | 100.885 %             | 859,550 cps       | 1.6 %         |
| 133Cs (KED) | 0.031 ppb             | 963 cps           | 3.3 %         |
| 138Ba (KED) | 2.533 ppb             | 114,080 cps       | 2.2 %         |
| 139La (KED) | 0.164 ppb             | 15,769 cps        | 1.8 %         |
| 140Ce (KED) | 0.332 ppb             | 42,743 cps        | 0.7 %         |
| 141Pr (KED) | 0.038 ppb             | 5,139 cps         | 0.7 %         |
| 142Nd (KED) | 0.204 ppb             | 10,993 cps        | 3.5 %         |
| 152Sm (KED) | 0.027 ppb             | 1,333 cps         | 4.4 %         |
| 153Eu (KED) | 0.006 ppb             | 597 cps           | 9.1 %         |
| 158Gd (KED) | 0.022 ppb             | 1,468 cps         | 3.4 %         |
| 159Tb (KED) | 103.651 %             | 4,911,685 cps     | 1.1 %         |
| 164Dy (KED) | 0.015 ppb             | 1,146 cps         | 2.4 %         |
| 166Er (KED) | 0.005 ppb             | 914 cps           | 5.8 %         |
| 169Tm (KED) | 0.001 ppb             | 323 cps           | 8.8 %         |
| 174Yb (KED) | 0.006 ppb             | 638 cps           | 1.5 %         |
| 175Lu (KED) | -0.105 ppb            | 18,502 cps        | 0.8 %         |
| 205Tl (KED) | 0.005 ppb             | 1,069 cps         | 4.4 %         |
| 208Pb (KED) | 0.659 ppb             | 94,228 cps        | 1.5 %         |
| 209Bi (KED) | 97.673 %              | 3,478,849 cps     | 0.4 %         |
| 232Th (KED) | 0.042 ppb             | 11,435 cps        | 2.3 %         |
| 238U (KED)  | 0.010 ppb             | 3,209 cps         | 3.8 %         |

## Sample Summary

Instrument ID: iCAP Q

Analysis index: 30

Analysis name: 80040jian

Analysis started at: 10/28/2021 4:27:27 PM

User name: WINDOWS-UPCI4ER\Administrator

| Category    | Concentration average | Concentration RSD |
|-------------|-----------------------|-------------------|
| 6Li (KED)   | 108.492 %             | 3.1 %             |
| 9Be (KED)   | 0.007 ppb             | 173.2 %           |
| 11B (KED)   | 22.622 ppb            | 3.3 %             |
| 24Mg (KED)  | 92.735 ppb            | 3.8 %             |
| 27Al (KED)  | 108.859 ppb           | 1.6 %             |
| 45Sc (KED)  | 106.507 %             | 0.5 %             |
| 51V (KED)   | 0.210 ppb             | 2.6 %             |
| 52Cr (KED)  | 0.469 ppb             | 4.3 %             |
| 55Mn (KED)  | 4.381 ppb             | 0.5 %             |
| 56Fe (KED)  | 106.943 ppb           | 2.0 %             |
| 58Ni (KED)  | 0.758 ppb             | 0.7 %             |
| 59Co (KED)  | 0.073 ppb             | 3.8 %             |
| 63Cu (KED)  | 2.723 ppb             | 3.0 %             |
| 64Zn (KED)  | 49.817 ppb            | 2.3 %             |
| 69Ga (KED)  | 0.498 ppb             | 5.1 %             |
| 75As (KED)  | 0.093 ppb             | 17.1 %            |
| 80Se (KED)  | 0.412 ppb             | 86.7 %            |
| 85Rb (KED)  | 0.850 ppb             | 4.7 %             |
| 88Sr (KED)  | 1.550 ppb             | 2.0 %             |
| 89Y (KED)   | 104.711 %             | 2.5 %             |
| 107Ag (KED) | 0.009 ppb             | 6.5 %             |
| 114Cd (KED) | 0.021 ppb             | 9.1 %             |
| 115In (KED) | 102.937 %             | 1.5 %             |
| 133Cs (KED) | 0.017 ppb             | 7.8 %             |
| 138Ba (KED) | 1.709 ppb             | 1.2 %             |
| 139La (KED) | 0.097 ppb             | 1.9 %             |
| 140Ce (KED) | 0.210 ppb             | 0.4 %             |
| 141Pr (KED) | 0.022 ppb             | 2.3 %             |
| 142Nd (KED) | 0.123 ppb             | 4.1 %             |
| 152Sm (KED) | 0.016 ppb             | 4.2 %             |
| 153Eu (KED) | 0.004 ppb             | 11.3 %            |
| 158Gd (KED) | 0.014 ppb             | 8.3 %             |
| 159Tb (KED) | 104.049 %             | 0.6 %             |
| 164Dy (KED) | 0.010 ppb             | 7.9 %             |
| 166Er (KED) | 0.002 ppb             | 11.2 %            |
| 169Tm (KED) | 0.001 ppb             | 8.7 %             |
| 174Yb (KED) | 0.004 ppb             | 6.3 %             |
| 175Lu (KED) | -0.108 ppb            | 0.5 %             |
| 205Tl (KED) | 0.003 ppb             | 5.1 %             |
| 208Pb (KED) | 0.367 ppb             | 2.8 %             |
| 209Bi (KED) | 98.796 %              | 2.1 %             |
| 232Th (KED) | 0.026 ppb             | 4.3 %             |
| 238U (KED)  | 0.007 ppb             | 6.9 %             |

| Category   | Concentration average | Intensity average | Intensity RSD |
|------------|-----------------------|-------------------|---------------|
| 6Li (KED)  | 108.492 %             | 3,323 cps         | 3.1 %         |
| 9Be (KED)  | 0.007 ppb             | 1 cps             | 173.2 %       |
| 11B (KED)  | 22.622 ppb            | 2,507 cps         | 0.9 %         |
| 24Mg (KED) | 92.735 ppb            | 58,513 cps        | 1.6 %         |
| 27Al (KED) | 108.859 ppb           | 16,844 cps        | 1.6 %         |

| Category    | Concentration average | Intensity average | Intensity RSD |
|-------------|-----------------------|-------------------|---------------|
| 45Sc (KED)  | 106.507 %             | 55,487 cps        | 0.5 %         |
| 51V (KED)   | 0.210 ppb             | 2,064 cps         | 2.2 %         |
| 52Cr (KED)  | 0.469 ppb             | 7,260 cps         | 4.0 %         |
| 55Mn (KED)  | 4.381 ppb             | 33,773 cps        | 0.0 %         |
| 56Fe (KED)  | 106.943 ppb           | 1,499,864 cps     | 1.5 %         |
| 58Ni (KED)  | 0.758 ppb             | 13,958 cps        | 1.2 %         |
| 59Co (KED)  | 0.073 ppb             | 2,229 cps         | 3.3 %         |
| 63Cu (KED)  | 2.723 ppb             | 60,431 cps        | 0.4 %         |
| 64Zn (KED)  | 49.817 ppb            | 235,809 cps       | 0.5 %         |
| 69Ga (KED)  | 0.498 ppb             | 3,639 cps         | 3.5 %         |
| 75As (KED)  | 0.093 ppb             | 148 cps           | 17.1 %        |
| 80Se (KED)  | 0.412 ppb             | 1,407 cps         | 8.5 %         |
| 85Rb (KED)  | 0.850 ppb             | 5,747 cps         | 2.6 %         |
| 88Sr (KED)  | 1.550 ppb             | 14,884 cps        | 2.8 %         |
| 89Y (KED)   | 104.711 %             | 503,704 cps       | 2.5 %         |
| 107Ag (KED) | 0.009 ppb             | 582 cps           | 6.9 %         |
| 114Cd (KED) | 0.021 ppb             | 399 cps           | 7.5 %         |
| 115In (KED) | 102.937 %             | 877,031 cps       | 1.5 %         |
| 133Cs (KED) | 0.017 ppb             | 561 cps           | 8.2 %         |
| 138Ba (KED) | 1.709 ppb             | 77,478 cps        | 1.4 %         |
| 139La (KED) | 0.097 ppb             | 9,350 cps         | 2.4 %         |
| 140Ce (KED) | 0.210 ppb             | 27,184 cps        | 0.5 %         |
| 141Pr (KED) | 0.022 ppb             | 2,947 cps         | 1.7 %         |
| 142Nd (KED) | 0.123 ppb             | 6,674 cps         | 3.6 %         |
| 152Sm (KED) | 0.016 ppb             | 801 cps           | 4.6 %         |
| 153Eu (KED) | 0.004 ppb             | 356 cps           | 11.6 %        |
| 158Gd (KED) | 0.014 ppb             | 940 cps           | 8.3 %         |
| 159Tb (KED) | 104.049 %             | 4,930,543 cps     | 0.6 %         |
| 164Dy (KED) | 0.010 ppb             | 773 cps           | 7.8 %         |
| 166Er (KED) | 0.002 ppb             | 681 cps           | 3.0 %         |
| 169Tm (KED) | 0.001 ppb             | 208 cps           | 8.8 %         |
| 174Yb (KED) | 0.004 ppb             | 486 cps           | 5.5 %         |
| 175Lu (KED) | -0.108 ppb            | 18,110 cps        | 0.2 %         |
| 205Tl (KED) | 0.003 ppb             | 696 cps           | 6.8 %         |
| 208Pb (KED) | 0.367 ppb             | 54,956 cps        | 0.5 %         |
| 209Bi (KED) | 98.796 %              | 3,518,850 cps     | 2.1 %         |
| 232Th (KED) | 0.026 ppb             | 7,104 cps         | 2.3 %         |
| 238U (KED)  | 0.007 ppb             | 2,215 cps         | 4.7 %         |

## Sample Summary

Instrument ID: iCAP Q

Analysis index: 31

Analysis name: 803041jian

Analysis started at: 10/28/2021 4:30:37 PM

User name: WINDOWS-UPCI4ER\Administrator

| Category    | Concentration average | Concentration RSD |
|-------------|-----------------------|-------------------|
| 6Li (KED)   | 115.387 %             |                   |
| 9Be (KED)   | 0.042 ppb             |                   |
| 11B (KED)   | 7.828 ppb             |                   |
| 24Mg (KED)  | 99.467 ppb            |                   |
| 27Al (KED)  | 127.736 ppb           |                   |
| 45Sc (KED)  | 109.346 %             |                   |
| 51V (KED)   | 0.252 ppb             |                   |
| 52Cr (KED)  | 0.557 ppb             |                   |
| 55Mn (KED)  | 5.926 ppb             |                   |
| 56Fe (KED)  | 142.855 ppb           |                   |
| 58Ni (KED)  | 1.280 ppb             |                   |
| 59Co (KED)  | 0.085 ppb             |                   |
| 63Cu (KED)  | 2.986 ppb             |                   |
| 64Zn (KED)  | 57.827 ppb            |                   |
| 69Ga (KED)  | 0.575 ppb             |                   |
| 75As (KED)  | 0.119 ppb             |                   |
| 80Se (KED)  | 0.471 ppb             |                   |
| 85Rb (KED)  | 0.455 ppb             |                   |
| 88Sr (KED)  | 1.651 ppb             |                   |
| 89Y (KED)   | 104.832 %             |                   |
| 107Ag (KED) | 0.010 ppb             |                   |
| 114Cd (KED) | 0.021 ppb             |                   |
| 115In (KED) | 105.175 %             |                   |
| 133Cs (KED) | 0.025 ppb             |                   |
| 138Ba (KED) | 1.940 ppb             |                   |
| 139La (KED) | 0.126 ppb             |                   |
| 140Ce (KED) | 0.267 ppb             |                   |
| 141Pr (KED) | 0.029 ppb             |                   |
| 142Nd (KED) | 0.158 ppb             |                   |
| 152Sm (KED) | 0.022 ppb             |                   |
| 153Eu (KED) | 0.004 ppb             |                   |
| 158Gd (KED) | 0.020 ppb             |                   |
| 159Tb (KED) | 107.417 %             |                   |
| 164Dy (KED) | 0.013 ppb             |                   |
| 166Er (KED) | 0.004 ppb             |                   |
| 169Tm (KED) | 0.001 ppb             |                   |
| 174Yb (KED) | 0.005 ppb             |                   |
| 175Lu (KED) | -0.111 ppb            |                   |
| 205Tl (KED) | 0.004 ppb             |                   |
| 208Pb (KED) | 0.383 ppb             |                   |
| 209Bi (KED) | 100.863 %             |                   |
| 232Th (KED) | 0.035 ppb             |                   |
| 238U (KED)  | 0.009 ppb             |                   |

| Category   | Concentration average | Intensity average | Intensity RSD |
|------------|-----------------------|-------------------|---------------|
| 6Li (KED)  | 115.387 %             | 3,534 cps         |               |
| 9Be (KED)  | 0.042 ppb             | 7 cps             |               |
| 11B (KED)  | 7.828 ppb             | 1,337 cps         |               |
| 24Mg (KED) | 99.467 ppb            | 66,785 cps        |               |
| 27Al (KED) | 127.736 ppb           | 20,276 cps        |               |

| Category    | Concentration average | Intensity average | Intensity RSD |
|-------------|-----------------------|-------------------|---------------|
| 45Sc (KED)  | 109.346 %             | 56,966 cps        |               |
| 51V (KED)   | 0.252 ppb             | 2,550 cps         |               |
| 52Cr (KED)  | 0.557 ppb             | 8,843 cps         |               |
| 55Mn (KED)  | 5.926 ppb             | 46,888 cps        |               |
| 56Fe (KED)  | 142.855 ppb           | 2,056,295 cps     |               |
| 58Ni (KED)  | 1.280 ppb             | 23,980 cps        |               |
| 59Co (KED)  | 0.085 ppb             | 2,634 cps         |               |
| 63Cu (KED)  | 2.986 ppb             | 66,172 cps        |               |
| 64Zn (KED)  | 57.827 ppb            | 273,802 cps       |               |
| 69Ga (KED)  | 0.575 ppb             | 4,204 cps         |               |
| 75As (KED)  | 0.119 ppb             | 187 cps           |               |
| 80Se (KED)  | 0.471 ppb             | 1,437 cps         |               |
| 85Rb (KED)  | 0.455 ppb             | 3,090 cps         |               |
| 88Sr (KED)  | 1.651 ppb             | 15,867 cps        |               |
| 89Y (KED)   | 104.832 %             | 504,284 cps       |               |
| 107Ag (KED) | 0.010 ppb             | 643 cps           |               |
| 114Cd (KED) | 0.021 ppb             | 413 cps           |               |
| 115In (KED) | 105.175 %             | 896,105 cps       |               |
| 133Cs (KED) | 0.025 ppb             | 810 cps           |               |
| 138Ba (KED) | 1.940 ppb             | 90,705 cps        |               |
| 139La (KED) | 0.126 ppb             | 12,500 cps        |               |
| 140Ce (KED) | 0.267 ppb             | 35,627 cps        |               |
| 141Pr (KED) | 0.029 ppb             | 4,007 cps         |               |
| 142Nd (KED) | 0.158 ppb             | 8,823 cps         |               |
| 152Sm (KED) | 0.022 ppb             | 1,100 cps         |               |
| 153Eu (KED) | 0.004 ppb             | 453 cps           |               |
| 158Gd (KED) | 0.020 ppb             | 1,367 cps         |               |
| 159Tb (KED) | 107.417 %             | 5,090,104 cps     |               |
| 164Dy (KED) | 0.013 ppb             | 1,003 cps         |               |
| 166Er (KED) | 0.004 ppb             | 860 cps           |               |
| 169Tm (KED) | 0.001 ppb             | 283 cps           |               |
| 174Yb (KED) | 0.005 ppb             | 520 cps           |               |
| 175Lu (KED) | -0.111 ppb            | 18,183 cps        |               |
| 205Tl (KED) | 0.004 ppb             | 883 cps           |               |
| 208Pb (KED) | 0.383 ppb             | 58,289 cps        |               |
| 209Bi (KED) | 100.863 %             | 3,592,463 cps     |               |
| 232Th (KED) | 0.035 ppb             | 9,797 cps         |               |
| 238U (KED)  | 0.009 ppb             | 3,030 cps         |               |

## Sample Summary

Instrument ID: iCAP Q

Analysis index: 32

Analysis name: 80057jian

Analysis started at: 10/28/2021 4:32:44 PM

User name: WINDOWS-UPCI4ER\Administrator

| Category    | Concentration average | Concentration RSD |
|-------------|-----------------------|-------------------|
| 6Li (KED)   | 110.379 %             |                   |
| 9Be (KED)   | 0.000 ppb             |                   |
| 11B (KED)   | 7.457 ppb             |                   |
| 24Mg (KED)  | 69.211 ppb            |                   |
| 27Al (KED)  | 91.842 ppb            |                   |
| 45Sc (KED)  | 107.990 %             |                   |
| 51V (KED)   | 0.142 ppb             |                   |
| 52Cr (KED)  | 0.498 ppb             |                   |
| 55Mn (KED)  | 2.604 ppb             |                   |
| 56Fe (KED)  | 96.236 ppb            |                   |
| 58Ni (KED)  | 1.337 ppb             |                   |
| 59Co (KED)  | 0.057 ppb             |                   |
| 63Cu (KED)  | 2.585 ppb             |                   |
| 64Zn (KED)  | 52.071 ppb            |                   |
| 69Ga (KED)  | 0.351 ppb             |                   |
| 75As (KED)  | 0.114 ppb             |                   |
| 80Se (KED)  | 0.135 ppb             |                   |
| 85Rb (KED)  | 0.659 ppb             |                   |
| 88Sr (KED)  | 1.364 ppb             |                   |
| 89Y (KED)   | 105.687 %             |                   |
| 107Ag (KED) | 0.027 ppb             |                   |
| 114Cd (KED) | 0.013 ppb             |                   |
| 115In (KED) | 101.708 %             |                   |
| 133Cs (KED) | 0.019 ppb             |                   |
| 138Ba (KED) | 1.197 ppb             |                   |
| 139La (KED) | 0.088 ppb             |                   |
| 140Ce (KED) | 0.198 ppb             |                   |
| 141Pr (KED) | 0.022 ppb             |                   |
| 142Nd (KED) | 0.118 ppb             |                   |
| 152Sm (KED) | 0.013 ppb             |                   |
| 153Eu (KED) | 0.003 ppb             |                   |
| 158Gd (KED) | 0.014 ppb             |                   |
| 159Tb (KED) | 104.417 %             |                   |
| 164Dy (KED) | 0.010 ppb             |                   |
| 166Er (KED) | 0.002 ppb             |                   |
| 169Tm (KED) | 0.001 ppb             |                   |
| 174Yb (KED) | 0.004 ppb             |                   |
| 175Lu (KED) | -0.109 ppb            |                   |
| 205Tl (KED) | 0.004 ppb             |                   |
| 208Pb (KED) | 0.256 ppb             |                   |
| 209Bi (KED) | 96.424 %              |                   |
| 232Th (KED) | 0.024 ppb             |                   |
| 238U (KED)  | 0.008 ppb             |                   |

| Category   | Concentration average | Intensity average | Intensity RSD |
|------------|-----------------------|-------------------|---------------|
| 6Li (KED)  | 110.379 %             | 3,380 cps         |               |
| 9Be (KED)  | 0.000 ppb             | 0 cps             |               |
| 11B (KED)  | 7.457 ppb             | 1,247 cps         |               |
| 24Mg (KED) | 69.211 ppb            | 44,499 cps        |               |
| 27Al (KED) | 91.842 ppb            | 14,422 cps        |               |

| Category    | Concentration average | Intensity average | Intensity RSD |
|-------------|-----------------------|-------------------|---------------|
| 45Sc (KED)  | 107.990 %             | 56,260 cps        |               |
| 51V (KED)   | 0.142 ppb             | 1,420 cps         |               |
| 52Cr (KED)  | 0.498 ppb             | 7,816 cps         |               |
| 55Mn (KED)  | 2.604 ppb             | 20,373 cps        |               |
| 56Fe (KED)  | 96.236 ppb            | 1,368,790 cps     |               |
| 58Ni (KED)  | 1.337 ppb             | 24,731 cps        |               |
| 59Co (KED)  | 0.057 ppb             | 1,757 cps         |               |
| 63Cu (KED)  | 2.585 ppb             | 58,024 cps        |               |
| 64Zn (KED)  | 52.071 ppb            | 248,774 cps       |               |
| 69Ga (KED)  | 0.351 ppb             | 2,607 cps         |               |
| 75As (KED)  | 0.114 ppb             | 180 cps           |               |
| 80Se (KED)  | 0.135 ppb             | 1,300 cps         |               |
| 85Rb (KED)  | 0.659 ppb             | 4,507 cps         |               |
| 88Sr (KED)  | 1.364 ppb             | 13,234 cps        |               |
| 89Y (KED)   | 105.687 %             | 508,398 cps       |               |
| 107Ag (KED) | 0.027 ppb             | 1,617 cps         |               |
| 114Cd (KED) | 0.013 ppb             | 260 cps           |               |
| 115In (KED) | 101.708 %             | 866,563 cps       |               |
| 133Cs (KED) | 0.019 ppb             | 603 cps           |               |
| 138Ba (KED) | 1.197 ppb             | 54,646 cps        |               |
| 139La (KED) | 0.088 ppb             | 8,523 cps         |               |
| 140Ce (KED) | 0.198 ppb             | 25,740 cps        |               |
| 141Pr (KED) | 0.022 ppb             | 2,960 cps         |               |
| 142Nd (KED) | 0.118 ppb             | 6,428 cps         |               |
| 152Sm (KED) | 0.013 ppb             | 657 cps           |               |
| 153Eu (KED) | 0.003 ppb             | 300 cps           |               |
| 158Gd (KED) | 0.014 ppb             | 937 cps           |               |
| 159Tb (KED) | 104.417 %             | 4,947,944 cps     |               |
| 164Dy (KED) | 0.010 ppb             | 747 cps           |               |
| 166Er (KED) | 0.002 ppb             | 680 cps           |               |
| 169Tm (KED) | 0.001 ppb             | 180 cps           |               |
| 174Yb (KED) | 0.004 ppb             | 403 cps           |               |
| 175Lu (KED) | -0.109 ppb            | 18,007 cps        |               |
| 205Tl (KED) | 0.004 ppb             | 717 cps           |               |
| 208Pb (KED) | 0.256 ppb             | 38,560 cps        |               |
| 209Bi (KED) | 96.424 %              | 3,434,355 cps     |               |
| 232Th (KED) | 0.024 ppb             | 6,542 cps         |               |
| 238U (KED)  | 0.008 ppb             | 2,674 cps         |               |

## Sample Summary

Instrument ID: iCAP Q

Analysis index: 33

Analysis name: 80119jian

Analysis started at: 10/28/2021 4:34:42 PM

User name: WINDOWS-UPCI4ER\Administrator

| Category    | Concentration average | Concentration RSD |
|-------------|-----------------------|-------------------|
| 6Li (KED)   | 110.161 %             |                   |
| 9Be (KED)   | 0.000 ppb             |                   |
| 11B (KED)   | 6.437 ppb             |                   |
| 24Mg (KED)  | 63.684 ppb            |                   |
| 27Al (KED)  | 91.418 ppb            |                   |
| 45Sc (KED)  | 108.864 %             |                   |
| 51V (KED)   | 0.169 ppb             |                   |
| 52Cr (KED)  | 0.911 ppb             |                   |
| 55Mn (KED)  | 4.149 ppb             |                   |
| 56Fe (KED)  | 93.274 ppb            |                   |
| 58Ni (KED)  | 0.608 ppb             |                   |
| 59Co (KED)  | 0.056 ppb             |                   |
| 63Cu (KED)  | 2.191 ppb             |                   |
| 64Zn (KED)  | 51.612 ppb            |                   |
| 69Ga (KED)  | 0.453 ppb             |                   |
| 75As (KED)  | 0.098 ppb             |                   |
| 80Se (KED)  | 0.148 ppb             |                   |
| 85Rb (KED)  | 0.483 ppb             |                   |
| 88Sr (KED)  | 1.098 ppb             |                   |
| 89Y (KED)   | 105.498 %             |                   |
| 107Ag (KED) | 0.025 ppb             |                   |
| 114Cd (KED) | 0.022 ppb             |                   |
| 115In (KED) | 103.848 %             |                   |
| 133Cs (KED) | 0.017 ppb             |                   |
| 138Ba (KED) | 1.506 ppb             |                   |
| 139La (KED) | 0.085 ppb             |                   |
| 140Ce (KED) | 0.177 ppb             |                   |
| 141Pr (KED) | 0.019 ppb             |                   |
| 142Nd (KED) | 0.108 ppb             |                   |
| 152Sm (KED) | 0.012 ppb             |                   |
| 153Eu (KED) | 0.003 ppb             |                   |
| 158Gd (KED) | 0.012 ppb             |                   |
| 159Tb (KED) | 105.359 %             |                   |
| 164Dy (KED) | 0.009 ppb             |                   |
| 166Er (KED) | 0.002 ppb             |                   |
| 169Tm (KED) | 0.001 ppb             |                   |
| 174Yb (KED) | 0.003 ppb             |                   |
| 175Lu (KED) | -0.106 ppb            |                   |
| 205Tl (KED) | 0.003 ppb             |                   |
| 208Pb (KED) | 0.365 ppb             |                   |
| 209Bi (KED) | 100.679 %             |                   |
| 232Th (KED) | 0.022 ppb             |                   |
| 238U (KED)  | 0.006 ppb             |                   |

| Category   | Concentration average | Intensity average | Intensity RSD |
|------------|-----------------------|-------------------|---------------|
| 6Li (KED)  | 110.161 %             | 3,374 cps         |               |
| 9Be (KED)  | 0.000 ppb             | 0 cps             |               |
| 11B (KED)  | 6.437 ppb             | 1,157 cps         |               |
| 24Mg (KED) | 63.684 ppb            | 40,877 cps        |               |
| 27Al (KED) | 91.418 ppb            | 14,472 cps        |               |

| Category    | Concentration average | Intensity average | Intensity RSD |
|-------------|-----------------------|-------------------|---------------|
| 45Sc (KED)  | 108.864 %             | 56,715 cps        |               |
| 51V (KED)   | 0.169 ppb             | 1,703 cps         |               |
| 52Cr (KED)  | 0.911 ppb             | 14,368 cps        |               |
| 55Mn (KED)  | 4.149 ppb             | 32,699 cps        |               |
| 56Fe (KED)  | 93.274 ppb            | 1,337,460 cps     |               |
| 58Ni (KED)  | 0.608 ppb             | 11,505 cps        |               |
| 59Co (KED)  | 0.056 ppb             | 1,733 cps         |               |
| 63Cu (KED)  | 2.191 ppb             | 49,428 cps        |               |
| 64Zn (KED)  | 51.612 ppb            | 246,158 cps       |               |
| 69Ga (KED)  | 0.453 ppb             | 3,344 cps         |               |
| 75As (KED)  | 0.098 ppb             | 157 cps           |               |
| 80Se (KED)  | 0.148 ppb             | 1,303 cps         |               |
| 85Rb (KED)  | 0.483 ppb             | 3,300 cps         |               |
| 88Sr (KED)  | 1.098 ppb             | 10,648 cps        |               |
| 89Y (KED)   | 105.498 %             | 507,490 cps       |               |
| 107Ag (KED) | 0.025 ppb             | 1,530 cps         |               |
| 114Cd (KED) | 0.022 ppb             | 423 cps           |               |
| 115In (KED) | 103.848 %             | 884,795 cps       |               |
| 133Cs (KED) | 0.017 ppb             | 553 cps           |               |
| 138Ba (KED) | 1.506 ppb             | 69,221 cps        |               |
| 139La (KED) | 0.085 ppb             | 8,256 cps         |               |
| 140Ce (KED) | 0.177 ppb             | 23,272 cps        |               |
| 141Pr (KED) | 0.019 ppb             | 2,627 cps         |               |
| 142Nd (KED) | 0.108 ppb             | 5,935 cps         |               |
| 152Sm (KED) | 0.012 ppb             | 603 cps           |               |
| 153Eu (KED) | 0.003 ppb             | 283 cps           |               |
| 158Gd (KED) | 0.012 ppb             | 803 cps           |               |
| 159Tb (KED) | 105.359 %             | 4,992,586 cps     |               |
| 164Dy (KED) | 0.009 ppb             | 667 cps           |               |
| 166Er (KED) | 0.002 ppb             | 660 cps           |               |
| 169Tm (KED) | 0.001 ppb             | 187 cps           |               |
| 174Yb (KED) | 0.003 ppb             | 297 cps           |               |
| 175Lu (KED) | -0.106 ppb            | 18,751 cps        |               |
| 205Tl (KED) | 0.003 ppb             | 607 cps           |               |
| 208Pb (KED) | 0.365 ppb             | 55,657 cps        |               |
| 209Bi (KED) | 100.679 %             | 3,585,887 cps     |               |
| 232Th (KED) | 0.022 ppb             | 6,295 cps         |               |
| 238U (KED)  | 0.006 ppb             | 1,953 cps         |               |

## Sample Summary

Instrument ID: iCAP Q

Analysis index: 34

Analysis name: 802024jian

Analysis started at: 10/28/2021 4:36:37 PM

User name: WINDOWS-UPCI4ER\Administrator

| Category    | Concentration average | Concentration RSD |
|-------------|-----------------------|-------------------|
| 6Li (KED)   | 117.564 %             |                   |
| 9Be (KED)   | 0.000 ppb             |                   |
| 11B (KED)   | 10.972 ppb            |                   |
| 24Mg (KED)  | 107.694 ppb           |                   |
| 27Al (KED)  | 167.543 ppb           |                   |
| 45Sc (KED)  | 109.166 %             |                   |
| 51V (KED)   | 0.328 ppb             |                   |
| 52Cr (KED)  | 0.553 ppb             |                   |
| 55Mn (KED)  | 5.269 ppb             |                   |
| 56Fe (KED)  | 187.800 ppb           |                   |
| 58Ni (KED)  | 0.936 ppb             |                   |
| 59Co (KED)  | 0.093 ppb             |                   |
| 63Cu (KED)  | 2.048 ppb             |                   |
| 64Zn (KED)  | 54.276 ppb            |                   |
| 69Ga (KED)  | 0.595 ppb             |                   |
| 75As (KED)  | 0.160 ppb             |                   |
| 80Se (KED)  | 0.120 ppb             |                   |
| 85Rb (KED)  | 0.661 ppb             |                   |
| 88Sr (KED)  | 1.431 ppb             |                   |
| 89Y (KED)   | 105.961 %             |                   |
| 107Ag (KED) | 0.011 ppb             |                   |
| 114Cd (KED) | 0.022 ppb             |                   |
| 115In (KED) | 103.211 %             |                   |
| 133Cs (KED) | 0.038 ppb             |                   |
| 138Ba (KED) | 2.019 ppb             |                   |
| 139La (KED) | 0.167 ppb             |                   |
| 140Ce (KED) | 0.359 ppb             |                   |
| 141Pr (KED) | 0.040 ppb             |                   |
| 142Nd (KED) | 0.215 ppb             |                   |
| 152Sm (KED) | 0.028 ppb             |                   |
| 153Eu (KED) | 0.005 ppb             |                   |
| 158Gd (KED) | 0.027 ppb             |                   |
| 159Tb (KED) | 104.029 %             |                   |
| 164Dy (KED) | 0.017 ppb             |                   |
| 166Er (KED) | 0.007 ppb             |                   |
| 169Tm (KED) | 0.001 ppb             |                   |
| 174Yb (KED) | 0.008 ppb             |                   |
| 175Lu (KED) | -0.103 ppb            |                   |
| 205Tl (KED) | 0.005 ppb             |                   |
| 208Pb (KED) | 0.304 ppb             |                   |
| 209Bi (KED) | 97.430 %              |                   |
| 232Th (KED) | 0.046 ppb             |                   |
| 238U (KED)  | 0.011 ppb             |                   |

| Category   | Concentration average | Intensity average | Intensity RSD |
|------------|-----------------------|-------------------|---------------|
| 6Li (KED)  | 117.564 %             | 3,601 cps         |               |
| 9Be (KED)  | 0.000 ppb             | 0 cps             |               |
| 11B (KED)  | 10.972 ppb            | 1,650 cps         |               |
| 24Mg (KED) | 107.694 ppb           | 73,660 cps        |               |
| 27Al (KED) | 167.543 ppb           | 26,525 cps        |               |

| Category    | Concentration average | Intensity average | Intensity RSD |
|-------------|-----------------------|-------------------|---------------|
| 45Sc (KED)  | 109.166 %             | 56,873 cps        |               |
| 51V (KED)   | 0.328 ppb             | 3,310 cps         |               |
| 52Cr (KED)  | 0.553 ppb             | 8,773 cps         |               |
| 55Mn (KED)  | 5.269 ppb             | 41,626 cps        |               |
| 56Fe (KED)  | 187.800 ppb           | 2,698,101 cps     |               |
| 58Ni (KED)  | 0.936 ppb             | 17,589 cps        |               |
| 59Co (KED)  | 0.093 ppb             | 2,900 cps         |               |
| 63Cu (KED)  | 2.048 ppb             | 46,543 cps        |               |
| 64Zn (KED)  | 54.276 ppb            | 259,892 cps       |               |
| 69Ga (KED)  | 0.595 ppb             | 4,401 cps         |               |
| 75As (KED)  | 0.160 ppb             | 250 cps           |               |
| 80Se (KED)  | 0.120 ppb             | 1,297 cps         |               |
| 85Rb (KED)  | 0.661 ppb             | 4,534 cps         |               |
| 88Sr (KED)  | 1.431 ppb             | 13,914 cps        |               |
| 89Y (KED)   | 105.961 %             | 509,717 cps       |               |
| 107Ag (KED) | 0.011 ppb             | 683 cps           |               |
| 114Cd (KED) | 0.022 ppb             | 423 cps           |               |
| 115In (KED) | 103.211 %             | 879,368 cps       |               |
| 133Cs (KED) | 0.038 ppb             | 1,230 cps         |               |
| 138Ba (KED) | 2.019 ppb             | 91,363 cps        |               |
| 139La (KED) | 0.167 ppb             | 16,050 cps        |               |
| 140Ce (KED) | 0.359 ppb             | 46,363 cps        |               |
| 141Pr (KED) | 0.040 ppb             | 5,428 cps         |               |
| 142Nd (KED) | 0.215 ppb             | 11,595 cps        |               |
| 152Sm (KED) | 0.028 ppb             | 1,377 cps         |               |
| 153Eu (KED) | 0.005 ppb             | 553 cps           |               |
| 158Gd (KED) | 0.027 ppb             | 1,830 cps         |               |
| 159Tb (KED) | 104.029 %             | 4,929,572 cps     |               |
| 164Dy (KED) | 0.017 ppb             | 1,290 cps         |               |
| 166Er (KED) | 0.007 ppb             | 1,053 cps         |               |
| 169Tm (KED) | 0.001 ppb             | 377 cps           |               |
| 174Yb (KED) | 0.008 ppb             | 807 cps           |               |
| 175Lu (KED) | -0.103 ppb            | 19,038 cps        |               |
| 205Tl (KED) | 0.005 ppb             | 970 cps           |               |
| 208Pb (KED) | 0.304 ppb             | 45,513 cps        |               |
| 209Bi (KED) | 97.430 %              | 3,470,165 cps     |               |
| 232Th (KED) | 0.046 ppb             | 12,550 cps        |               |
| 238U (KED)  | 0.011 ppb             | 3,524 cps         |               |

## Sample Summary

Instrument ID: iCAP Q

Analysis index: 35

Analysis name: 801017jian

Analysis started at: 10/28/2021 4:38:31 PM

User name: WINDOWS-UPCI4ER\Administrator

| Category    | Concentration average | Concentration RSD |
|-------------|-----------------------|-------------------|
| 6Li (KED)   | 105.479 %             |                   |
| 9Be (KED)   | 0.023 ppb             |                   |
| 11B (KED)   | 11.575 ppb            |                   |
| 24Mg (KED)  | 98.748 ppb            |                   |
| 27Al (KED)  | 115.185 ppb           |                   |
| 45Sc (KED)  | 108.832 %             |                   |
| 51V (KED)   | 0.236 ppb             |                   |
| 52Cr (KED)  | 0.574 ppb             |                   |
| 55Mn (KED)  | 5.309 ppb             |                   |
| 56Fe (KED)  | 119.985 ppb           |                   |
| 58Ni (KED)  | 0.671 ppb             |                   |
| 59Co (KED)  | 0.082 ppb             |                   |
| 63Cu (KED)  | 2.336 ppb             |                   |
| 64Zn (KED)  | 50.545 ppb            |                   |
| 69Ga (KED)  | 0.526 ppb             |                   |
| 75As (KED)  | 0.119 ppb             |                   |
| 80Se (KED)  | 0.080 ppb             |                   |
| 85Rb (KED)  | 0.423 ppb             |                   |
| 88Sr (KED)  | 1.584 ppb             |                   |
| 89Y (KED)   | 105.241 %             |                   |
| 107Ag (KED) | 0.022 ppb             |                   |
| 114Cd (KED) | 0.022 ppb             |                   |
| 115In (KED) | 103.005 %             |                   |
| 133Cs (KED) | 0.025 ppb             |                   |
| 138Ba (KED) | 1.838 ppb             |                   |
| 139La (KED) | 0.122 ppb             |                   |
| 140Ce (KED) | 0.255 ppb             |                   |
| 141Pr (KED) | 0.028 ppb             |                   |
| 142Nd (KED) | 0.152 ppb             |                   |
| 152Sm (KED) | 0.019 ppb             |                   |
| 153Eu (KED) | 0.004 ppb             |                   |
| 158Gd (KED) | 0.018 ppb             |                   |
| 159Tb (KED) | 103.758 %             |                   |
| 164Dy (KED) | 0.014 ppb             |                   |
| 166Er (KED) | 0.004 ppb             |                   |
| 169Tm (KED) | 0.001 ppb             |                   |
| 174Yb (KED) | 0.005 ppb             |                   |
| 175Lu (KED) | -0.110 ppb            |                   |
| 205Tl (KED) | 0.003 ppb             |                   |
| 208Pb (KED) | 0.387 ppb             |                   |
| 209Bi (KED) | 96.474 %              |                   |
| 232Th (KED) | 0.033 ppb             |                   |
| 238U (KED)  | 0.009 ppb             |                   |

| Category   | Concentration average | Intensity average | Intensity RSD |
|------------|-----------------------|-------------------|---------------|
| 6Li (KED)  | 105.479 %             | 3,230 cps         |               |
| 9Be (KED)  | 0.023 ppb             | 3 cps             |               |
| 11B (KED)  | 11.575 ppb            | 1,530 cps         |               |
| 24Mg (KED) | 98.748 ppb            | 60,610 cps        |               |
| 27Al (KED) | 115.185 ppb           | 18,207 cps        |               |

| Category    | Concentration average | Intensity average | Intensity RSD |
|-------------|-----------------------|-------------------|---------------|
| 45Sc (KED)  | 108.832 %             | 56,698 cps        |               |
| 51V (KED)   | 0.236 ppb             | 2,374 cps         |               |
| 52Cr (KED)  | 0.574 ppb             | 9,067 cps         |               |
| 55Mn (KED)  | 5.309 ppb             | 41,813 cps        |               |
| 56Fe (KED)  | 119.985 ppb           | 1,719,331 cps     |               |
| 58Ni (KED)  | 0.671 ppb             | 12,663 cps        |               |
| 59Co (KED)  | 0.082 ppb             | 2,544 cps         |               |
| 63Cu (KED)  | 2.336 ppb             | 52,426 cps        |               |
| 64Zn (KED)  | 50.545 ppb            | 240,523 cps       |               |
| 69Ga (KED)  | 0.526 ppb             | 3,871 cps         |               |
| 75As (KED)  | 0.119 ppb             | 187 cps           |               |
| 80Se (KED)  | 0.080 ppb             | 1,270 cps         |               |
| 85Rb (KED)  | 0.423 ppb             | 2,887 cps         |               |
| 88Sr (KED)  | 1.584 ppb             | 15,293 cps        |               |
| 89Y (KED)   | 105.241 %             | 506,251 cps       |               |
| 107Ag (KED) | 0.022 ppb             | 1,350 cps         |               |
| 114Cd (KED) | 0.022 ppb             | 420 cps           |               |
| 115In (KED) | 103.005 %             | 877,618 cps       |               |
| 133Cs (KED) | 0.025 ppb             | 817 cps           |               |
| 138Ba (KED) | 1.838 ppb             | 83,042 cps        |               |
| 139La (KED) | 0.122 ppb             | 11,699 cps        |               |
| 140Ce (KED) | 0.255 ppb             | 32,917 cps        |               |
| 141Pr (KED) | 0.028 ppb             | 3,787 cps         |               |
| 142Nd (KED) | 0.152 ppb             | 8,183 cps         |               |
| 152Sm (KED) | 0.019 ppb             | 953 cps           |               |
| 153Eu (KED) | 0.004 ppb             | 427 cps           |               |
| 158Gd (KED) | 0.018 ppb             | 1,167 cps         |               |
| 159Tb (KED) | 103.758 %             | 4,916,745 cps     |               |
| 164Dy (KED) | 0.014 ppb             | 1,033 cps         |               |
| 166Er (KED) | 0.004 ppb             | 793 cps           |               |
| 169Tm (KED) | 0.001 ppb             | 223 cps           |               |
| 174Yb (KED) | 0.005 ppb             | 547 cps           |               |
| 175Lu (KED) | -0.110 ppb            | 17,793 cps        |               |
| 205Tl (KED) | 0.003 ppb             | 713 cps           |               |
| 208Pb (KED) | 0.387 ppb             | 56,307 cps        |               |
| 209Bi (KED) | 96.474 %              | 3,436,142 cps     |               |
| 232Th (KED) | 0.033 ppb             | 8,887 cps         |               |
| 238U (KED)  | 0.009 ppb             | 3,034 cps         |               |

## Sample Summary

Instrument ID: iCAP Q

Analysis index: 36

Analysis name: 80100jian

Analysis started at: 10/28/2021 4:40:24 PM

User name: WINDOWS-UPCI4ER\Administrator

| Category    | Concentration average | Concentration RSD |
|-------------|-----------------------|-------------------|
| 6Li (KED)   | 115.387 %             |                   |
| 9Be (KED)   | 0.083 ppb             |                   |
| 11B (KED)   | 1.566 ppb             |                   |
| 24Mg (KED)  | 77.842 ppb            |                   |
| 27Al (KED)  | 109.092 ppb           |                   |
| 45Sc (KED)  | 109.320 %             |                   |
| 51V (KED)   | 0.211 ppb             |                   |
| 52Cr (KED)  | 0.523 ppb             |                   |
| 55Mn (KED)  | 3.799 ppb             |                   |
| 56Fe (KED)  | 148.163 ppb           |                   |
| 58Ni (KED)  | 1.076 ppb             |                   |
| 59Co (KED)  | 0.066 ppb             |                   |
| 63Cu (KED)  | 2.003 ppb             |                   |
| 64Zn (KED)  | 48.616 ppb            |                   |
| 69Ga (KED)  | 0.496 ppb             |                   |
| 75As (KED)  | 0.106 ppb             |                   |
| 80Se (KED)  | 0.186 ppb             |                   |
| 85Rb (KED)  | 0.955 ppb             |                   |
| 88Sr (KED)  | 1.214 ppb             |                   |
| 89Y (KED)   | 106.304 %             |                   |
| 107Ag (KED) | 0.017 ppb             |                   |
| 114Cd (KED) | 0.038 ppb             |                   |
| 115In (KED) | 104.832 %             |                   |
| 133Cs (KED) | 0.022 ppb             |                   |
| 138Ba (KED) | 1.631 ppb             |                   |
| 139La (KED) | 0.121 ppb             |                   |
| 140Ce (KED) | 0.258 ppb             |                   |
| 141Pr (KED) | 0.030 ppb             |                   |
| 142Nd (KED) | 0.158 ppb             |                   |
| 152Sm (KED) | 0.021 ppb             |                   |
| 153Eu (KED) | 0.004 ppb             |                   |
| 158Gd (KED) | 0.018 ppb             |                   |
| 159Tb (KED) | 105.639 %             |                   |
| 164Dy (KED) | 0.013 ppb             |                   |
| 166Er (KED) | 0.003 ppb             |                   |
| 169Tm (KED) | 0.001 ppb             |                   |
| 174Yb (KED) | 0.005 ppb             |                   |
| 175Lu (KED) | -0.105 ppb            |                   |
| 205Tl (KED) | 0.003 ppb             |                   |
| 208Pb (KED) | 0.289 ppb             |                   |
| 209Bi (KED) | 101.653 %             |                   |
| 232Th (KED) | 0.033 ppb             |                   |
| 238U (KED)  | 0.007 ppb             |                   |

| Category   | Concentration average | Intensity average | Intensity RSD |
|------------|-----------------------|-------------------|---------------|
| 6Li (KED)  | 115.387 %             | 3,534 cps         |               |
| 9Be (KED)  | 0.083 ppb             | 13 cps            |               |
| 11B (KED)  | 1.566 ppb             | 773 cps           |               |
| 24Mg (KED) | 77.842 ppb            | 52,299 cps        |               |
| 27Al (KED) | 109.092 ppb           | 17,325 cps        |               |

| Category    | Concentration average | Intensity average | Intensity RSD |
|-------------|-----------------------|-------------------|---------------|
| 45Sc (KED)  | 109.320 %             | 56,953 cps        |               |
| 51V (KED)   | 0.211 ppb             | 2,130 cps         |               |
| 52Cr (KED)  | 0.523 ppb             | 8,313 cps         |               |
| 55Mn (KED)  | 3.799 ppb             | 30,066 cps        |               |
| 56Fe (KED)  | 148.163 ppb           | 2,132,122 cps     |               |
| 58Ni (KED)  | 1.076 ppb             | 20,200 cps        |               |
| 59Co (KED)  | 0.066 ppb             | 2,067 cps         |               |
| 63Cu (KED)  | 2.003 ppb             | 45,717 cps        |               |
| 64Zn (KED)  | 48.616 ppb            | 233,762 cps       |               |
| 69Ga (KED)  | 0.496 ppb             | 3,684 cps         |               |
| 75As (KED)  | 0.106 ppb             | 170 cps           |               |
| 80Se (KED)  | 0.186 ppb             | 1,330 cps         |               |
| 85Rb (KED)  | 0.955 ppb             | 6,562 cps         |               |
| 88Sr (KED)  | 1.214 ppb             | 11,856 cps        |               |
| 89Y (KED)   | 106.304 %             | 511,365 cps       |               |
| 107Ag (KED) | 0.017 ppb             | 1,057 cps         |               |
| 114Cd (KED) | 0.038 ppb             | 737 cps           |               |
| 115In (KED) | 104.832 %             | 893,183 cps       |               |
| 133Cs (KED) | 0.022 ppb             | 727 cps           |               |
| 138Ba (KED) | 1.631 ppb             | 75,092 cps        |               |
| 139La (KED) | 0.121 ppb             | 11,889 cps        |               |
| 140Ce (KED) | 0.258 ppb             | 33,916 cps        |               |
| 141Pr (KED) | 0.030 ppb             | 4,124 cps         |               |
| 142Nd (KED) | 0.158 ppb             | 8,683 cps         |               |
| 152Sm (KED) | 0.021 ppb             | 1,027 cps         |               |
| 153Eu (KED) | 0.004 ppb             | 373 cps           |               |
| 158Gd (KED) | 0.018 ppb             | 1,203 cps         |               |
| 159Tb (KED) | 105.639 %             | 5,005,861 cps     |               |
| 164Dy (KED) | 0.013 ppb             | 977 cps           |               |
| 166Er (KED) | 0.003 ppb             | 713 cps           |               |
| 169Tm (KED) | 0.001 ppb             | 203 cps           |               |
| 174Yb (KED) | 0.005 ppb             | 500 cps           |               |
| 175Lu (KED) | -0.105 ppb            | 18,904 cps        |               |
| 205Tl (KED) | 0.003 ppb             | 590 cps           |               |
| 208Pb (KED) | 0.289 ppb             | 45,459 cps        |               |
| 209Bi (KED) | 101.653 %             | 3,620,604 cps     |               |
| 232Th (KED) | 0.033 ppb             | 9,490 cps         |               |
| 238U (KED)  | 0.007 ppb             | 2,514 cps         |               |

## Sample Summary

Instrument ID: iCAP Q

Analysis index: 37

Analysis name: 80154jian

Analysis started at: 10/28/2021 4:42:18 PM

User name: WINDOWS-UPCI4ER\Administrator

| Category    | Concentration average | Concentration RSD |
|-------------|-----------------------|-------------------|
| 6Li (KED)   | 113.536 %             |                   |
| 9Be (KED)   | 0.021 ppb             |                   |
| 11B (KED)   | 5.095 ppb             |                   |
| 24Mg (KED)  | 102.374 ppb           |                   |
| 27Al (KED)  | 169.456 ppb           |                   |
| 45Sc (KED)  | 108.658 %             |                   |
| 51V (KED)   | 0.349 ppb             |                   |
| 52Cr (KED)  | 2.360 ppb             |                   |
| 55Mn (KED)  | 5.547 ppb             |                   |
| 56Fe (KED)  | 194.499 ppb           |                   |
| 58Ni (KED)  | 1.018 ppb             |                   |
| 59Co (KED)  | 0.090 ppb             |                   |
| 63Cu (KED)  | 2.304 ppb             |                   |
| 64Zn (KED)  | 54.246 ppb            |                   |
| 69Ga (KED)  | 0.590 ppb             |                   |
| 75As (KED)  | 0.092 ppb             |                   |
| 80Se (KED)  | 0.158 ppb             |                   |
| 85Rb (KED)  | 0.829 ppb             |                   |
| 88Sr (KED)  | 1.224 ppb             |                   |
| 89Y (KED)   | 109.430 %             |                   |
| 107Ag (KED) | 0.014 ppb             |                   |
| 114Cd (KED) | 0.040 ppb             |                   |
| 115In (KED) | 106.898 %             |                   |
| 133Cs (KED) | 0.030 ppb             |                   |
| 138Ba (KED) | 2.117 ppb             |                   |
| 139La (KED) | 0.147 ppb             |                   |
| 140Ce (KED) | 0.309 ppb             |                   |
| 141Pr (KED) | 0.035 ppb             |                   |
| 142Nd (KED) | 0.189 ppb             |                   |
| 152Sm (KED) | 0.026 ppb             |                   |
| 153Eu (KED) | 0.005 ppb             |                   |
| 158Gd (KED) | 0.023 ppb             |                   |
| 159Tb (KED) | 106.704 %             |                   |
| 164Dy (KED) | 0.017 ppb             |                   |
| 166Er (KED) | 0.005 ppb             |                   |
| 169Tm (KED) | 0.001 ppb             |                   |
| 174Yb (KED) | 0.006 ppb             |                   |
| 175Lu (KED) | -0.106 ppb            |                   |
| 205Tl (KED) | 0.004 ppb             |                   |
| 208Pb (KED) | 0.342 ppb             |                   |
| 209Bi (KED) | 100.255 %             |                   |
| 232Th (KED) | 0.051 ppb             |                   |
| 238U (KED)  | 0.010 ppb             |                   |

| Category   | Concentration average | Intensity average | Intensity RSD |
|------------|-----------------------|-------------------|---------------|
| 6Li (KED)  | 113.536 %             | 3,477 cps         |               |
| 9Be (KED)  | 0.021 ppb             | 3 cps             |               |
| 11B (KED)  | 5.095 ppb             | 1,073 cps         |               |
| 24Mg (KED) | 102.374 ppb           | 67,629 cps        |               |
| 27Al (KED) | 169.456 ppb           | 26,702 cps        |               |

| Category    | Concentration average | Intensity average | Intensity RSD |
|-------------|-----------------------|-------------------|---------------|
| 45Sc (KED)  | 108.658 %             | 56,608 cps        |               |
| 51V (KED)   | 0.349 ppb             | 3,504 cps         |               |
| 52Cr (KED)  | 2.360 ppb             | 37,078 cps        |               |
| 55Mn (KED)  | 5.547 ppb             | 43,616 cps        |               |
| 56Fe (KED)  | 194.499 ppb           | 2,781,274 cps     |               |
| 58Ni (KED)  | 1.018 ppb             | 19,014 cps        |               |
| 59Co (KED)  | 0.090 ppb             | 2,774 cps         |               |
| 63Cu (KED)  | 2.304 ppb             | 53,802 cps        |               |
| 64Zn (KED)  | 54.246 ppb            | 268,252 cps       |               |
| 69Ga (KED)  | 0.590 ppb             | 4,507 cps         |               |
| 75As (KED)  | 0.092 ppb             | 153 cps           |               |
| 80Se (KED)  | 0.158 ppb             | 1,357 cps         |               |
| 85Rb (KED)  | 0.829 ppb             | 5,865 cps         |               |
| 88Sr (KED)  | 1.224 ppb             | 12,306 cps        |               |
| 89Y (KED)   | 109.430 %             | 526,406 cps       |               |
| 107Ag (KED) | 0.014 ppb             | 903 cps           |               |
| 114Cd (KED) | 0.040 ppb             | 790 cps           |               |
| 115In (KED) | 106.898 %             | 910,782 cps       |               |
| 133Cs (KED) | 0.030 ppb             | 1,003 cps         |               |
| 138Ba (KED) | 2.117 ppb             | 98,248 cps        |               |
| 139La (KED) | 0.147 ppb             | 14,498 cps        |               |
| 140Ce (KED) | 0.309 ppb             | 40,977 cps        |               |
| 141Pr (KED) | 0.035 ppb             | 4,808 cps         |               |
| 142Nd (KED) | 0.189 ppb             | 10,494 cps        |               |
| 152Sm (KED) | 0.026 ppb             | 1,320 cps         |               |
| 153Eu (KED) | 0.005 ppb             | 550 cps           |               |
| 158Gd (KED) | 0.023 ppb             | 1,600 cps         |               |
| 159Tb (KED) | 106.704 %             | 5,056,328 cps     |               |
| 164Dy (KED) | 0.017 ppb             | 1,297 cps         |               |
| 166Er (KED) | 0.005 ppb             | 893 cps           |               |
| 169Tm (KED) | 0.001 ppb             | 277 cps           |               |
| 174Yb (KED) | 0.006 ppb             | 697 cps           |               |
| 175Lu (KED) | -0.106 ppb            | 18,904 cps        |               |
| 205Tl (KED) | 0.004 ppb             | 743 cps           |               |
| 208Pb (KED) | 0.342 ppb             | 52,263 cps        |               |
| 209Bi (KED) | 100.255 %             | 3,570,801 cps     |               |
| 232Th (KED) | 0.051 ppb             | 14,272 cps        |               |
| 238U (KED)  | 0.010 ppb             | 3,394 cps         |               |

## Sample Summary

Instrument ID: iCAP Q

Analysis index: 38

Analysis name: 80142jian

Analysis started at: 10/28/2021 4:44:09 PM

User name: WINDOWS-UPCI4ER\Administrator

| Category    | Concentration average | Concentration RSD |
|-------------|-----------------------|-------------------|
| 6Li (KED)   | 109.399 %             |                   |
| 9Be (KED)   | 0.022 ppb             |                   |
| 11B (KED)   | 6.726 ppb             |                   |
| 24Mg (KED)  | 68.211 ppb            |                   |
| 27Al (KED)  | 100.256 ppb           |                   |
| 45Sc (KED)  | 108.709 %             |                   |
| 51V (KED)   | 0.197 ppb             |                   |
| 52Cr (KED)  | 2.692 ppb             |                   |
| 55Mn (KED)  | 3.494 ppb             |                   |
| 56Fe (KED)  | 163.636 ppb           |                   |
| 58Ni (KED)  | 1.240 ppb             |                   |
| 59Co (KED)  | 0.062 ppb             |                   |
| 63Cu (KED)  | 2.629 ppb             |                   |
| 64Zn (KED)  | 52.395 ppb            |                   |
| 69Ga (KED)  | 0.471 ppb             |                   |
| 75As (KED)  | 0.087 ppb             |                   |
| 80Se (KED)  | 0.226 ppb             |                   |
| 85Rb (KED)  | 0.562 ppb             |                   |
| 88Sr (KED)  | 1.037 ppb             |                   |
| 89Y (KED)   | 105.690 %             |                   |
| 107Ag (KED) | 0.016 ppb             |                   |
| 114Cd (KED) | 0.038 ppb             |                   |
| 115In (KED) | 103.966 %             |                   |
| 133Cs (KED) | 0.017 ppb             |                   |
| 138Ba (KED) | 1.563 ppb             |                   |
| 139La (KED) | 0.104 ppb             |                   |
| 140Ce (KED) | 0.219 ppb             |                   |
| 141Pr (KED) | 0.024 ppb             |                   |
| 142Nd (KED) | 0.135 ppb             |                   |
| 152Sm (KED) | 0.017 ppb             |                   |
| 153Eu (KED) | 0.003 ppb             |                   |
| 158Gd (KED) | 0.014 ppb             |                   |
| 159Tb (KED) | 105.259 %             |                   |
| 164Dy (KED) | 0.010 ppb             |                   |
| 166Er (KED) | 0.002 ppb             |                   |
| 169Tm (KED) | 0.001 ppb             |                   |
| 174Yb (KED) | 0.005 ppb             |                   |
| 175Lu (KED) | -0.109 ppb            |                   |
| 205Tl (KED) | 0.002 ppb             |                   |
| 208Pb (KED) | 0.311 ppb             |                   |
| 209Bi (KED) | 100.890 %             |                   |
| 232Th (KED) | 0.028 ppb             |                   |
| 238U (KED)  | 0.007 ppb             |                   |

| Category   | Concentration average | Intensity average | Intensity RSD |
|------------|-----------------------|-------------------|---------------|
| 6Li (KED)  | 109.399 %             | 3,350 cps         |               |
| 9Be (KED)  | 0.022 ppb             | 3 cps             |               |
| 11B (KED)  | 6.726 ppb             | 1,173 cps         |               |
| 24Mg (KED) | 68.211 ppb            | 43,469 cps        |               |
| 27Al (KED) | 100.256 ppb           | 15,840 cps        |               |

| Category    | Concentration average | Intensity average | Intensity RSD |
|-------------|-----------------------|-------------------|---------------|
| 45Sc (KED)  | 108.709 %             | 56,635 cps        |               |
| 51V (KED)   | 0.197 ppb             | 1,977 cps         |               |
| 52Cr (KED)  | 2.692 ppb             | 42,305 cps        |               |
| 55Mn (KED)  | 3.494 ppb             | 27,504 cps        |               |
| 56Fe (KED)  | 163.636 ppb           | 2,341,390 cps     |               |
| 58Ni (KED)  | 1.240 ppb             | 23,101 cps        |               |
| 59Co (KED)  | 0.062 ppb             | 1,933 cps         |               |
| 63Cu (KED)  | 2.629 ppb             | 58,982 cps        |               |
| 64Zn (KED)  | 52.395 ppb            | 250,314 cps       |               |
| 69Ga (KED)  | 0.471 ppb             | 3,484 cps         |               |
| 75As (KED)  | 0.087 ppb             | 140 cps           |               |
| 80Se (KED)  | 0.226 ppb             | 1,340 cps         |               |
| 85Rb (KED)  | 0.562 ppb             | 3,847 cps         |               |
| 88Sr (KED)  | 1.037 ppb             | 10,084 cps        |               |
| 89Y (KED)   | 105.690 %             | 508,414 cps       |               |
| 107Ag (KED) | 0.016 ppb             | 1,007 cps         |               |
| 114Cd (KED) | 0.038 ppb             | 730 cps           |               |
| 115In (KED) | 103.966 %             | 885,800 cps       |               |
| 133Cs (KED) | 0.017 ppb             | 557 cps           |               |
| 138Ba (KED) | 1.563 ppb             | 71,752 cps        |               |
| 139La (KED) | 0.104 ppb             | 10,137 cps        |               |
| 140Ce (KED) | 0.219 ppb             | 28,713 cps        |               |
| 141Pr (KED) | 0.024 ppb             | 3,297 cps         |               |
| 142Nd (KED) | 0.135 ppb             | 7,376 cps         |               |
| 152Sm (KED) | 0.017 ppb             | 853 cps           |               |
| 153Eu (KED) | 0.003 ppb             | 330 cps           |               |
| 158Gd (KED) | 0.014 ppb             | 977 cps           |               |
| 159Tb (KED) | 105.259 %             | 4,987,881 cps     |               |
| 164Dy (KED) | 0.010 ppb             | 780 cps           |               |
| 166Er (KED) | 0.002 ppb             | 620 cps           |               |
| 169Tm (KED) | 0.001 ppb             | 170 cps           |               |
| 174Yb (KED) | 0.005 ppb             | 510 cps           |               |
| 175Lu (KED) | -0.109 ppb            | 18,103 cps        |               |
| 205Tl (KED) | 0.002 ppb             | 533 cps           |               |
| 208Pb (KED) | 0.311 ppb             | 48,173 cps        |               |
| 209Bi (KED) | 100.890 %             | 3,593,397 cps     |               |
| 232Th (KED) | 0.028 ppb             | 7,946 cps         |               |
| 238U (KED)  | 0.007 ppb             | 2,534 cps         |               |

## Sample Summary

Instrument ID: iCAP Q

Analysis index: 39

Analysis name: 701032jian

Analysis started at: 10/28/2021 4:46:01 PM

User name: WINDOWS-UPCI4ER\Administrator

| Category    | Concentration average | Concentration RSD |
|-------------|-----------------------|-------------------|
| 6Li (KED)   | 112.992 %             |                   |
| 9Be (KED)   | 0.000 ppb             |                   |
| 11B (KED)   | 2.618 ppb             |                   |
| 24Mg (KED)  | 70.426 ppb            |                   |
| 27Al (KED)  | 140.990 ppb           |                   |
| 45Sc (KED)  | 110.008 %             |                   |
| 51V (KED)   | 0.264 ppb             |                   |
| 52Cr (KED)  | 2.058 ppb             |                   |
| 55Mn (KED)  | 3.759 ppb             |                   |
| 56Fe (KED)  | 148.945 ppb           |                   |
| 58Ni (KED)  | 1.012 ppb             |                   |
| 59Co (KED)  | 0.067 ppb             |                   |
| 63Cu (KED)  | 4.191 ppb             |                   |
| 64Zn (KED)  | 53.765 ppb            |                   |
| 69Ga (KED)  | 0.506 ppb             |                   |
| 75As (KED)  | 0.113 ppb             |                   |
| 80Se (KED)  | 0.261 ppb             |                   |
| 85Rb (KED)  | 0.588 ppb             |                   |
| 88Sr (KED)  | 0.952 ppb             |                   |
| 89Y (KED)   | 106.278 %             |                   |
| 107Ag (KED) | 0.010 ppb             |                   |
| 114Cd (KED) | 0.082 ppb             |                   |
| 115In (KED) | 105.609 %             |                   |
| 133Cs (KED) | 0.024 ppb             |                   |
| 138Ba (KED) | 1.774 ppb             |                   |
| 139La (KED) | 0.118 ppb             |                   |
| 140Ce (KED) | 0.258 ppb             |                   |
| 141Pr (KED) | 0.030 ppb             |                   |
| 142Nd (KED) | 0.156 ppb             |                   |
| 152Sm (KED) | 0.022 ppb             |                   |
| 153Eu (KED) | 0.004 ppb             |                   |
| 158Gd (KED) | 0.017 ppb             |                   |
| 159Tb (KED) | 105.296 %             |                   |
| 164Dy (KED) | 0.011 ppb             |                   |
| 166Er (KED) | 0.003 ppb             |                   |
| 169Tm (KED) | 0.001 ppb             |                   |
| 174Yb (KED) | 0.005 ppb             |                   |
| 175Lu (KED) | -0.115 ppb            |                   |
| 205Tl (KED) | 0.003 ppb             |                   |
| 208Pb (KED) | 0.844 ppb             |                   |
| 209Bi (KED) | 98.744 %              |                   |
| 232Th (KED) | 0.033 ppb             |                   |
| 238U (KED)  | 0.008 ppb             |                   |

| Category   | Concentration average | Intensity average | Intensity RSD |
|------------|-----------------------|-------------------|---------------|
| 6Li (KED)  | 112.992 %             | 3,460 cps         |               |
| 9Be (KED)  | 0.000 ppb             | 0 cps             |               |
| 11B (KED)  | 2.618 ppb             | 850 cps           |               |
| 24Mg (KED) | 70.426 ppb            | 46,349 cps        |               |
| 27Al (KED) | 140.990 ppb           | 22,507 cps        |               |

| Category    | Concentration average | Intensity average | Intensity RSD |
|-------------|-----------------------|-------------------|---------------|
| 45Sc (KED)  | 110.008 %             | 57,311 cps        |               |
| 51V (KED)   | 0.264 ppb             | 2,684 cps         |               |
| 52Cr (KED)  | 2.058 ppb             | 32,740 cps        |               |
| 55Mn (KED)  | 3.759 ppb             | 29,943 cps        |               |
| 56Fe (KED)  | 148.945 ppb           | 2,156,847 cps     |               |
| 58Ni (KED)  | 1.012 ppb             | 19,148 cps        |               |
| 59Co (KED)  | 0.067 ppb             | 2,114 cps         |               |
| 63Cu (KED)  | 4.191 ppb             | 93,277 cps        |               |
| 64Zn (KED)  | 53.765 ppb            | 258,234 cps       |               |
| 69Ga (KED)  | 0.506 ppb             | 3,761 cps         |               |
| 75As (KED)  | 0.113 ppb             | 180 cps           |               |
| 80Se (KED)  | 0.261 ppb             | 1,363 cps         |               |
| 85Rb (KED)  | 0.588 ppb             | 4,047 cps         |               |
| 88Sr (KED)  | 0.952 ppb             | 9,313 cps         |               |
| 89Y (KED)   | 106.278 %             | 511,240 cps       |               |
| 107Ag (KED) | 0.010 ppb             | 653 cps           |               |
| 114Cd (KED) | 0.082 ppb             | 1,577 cps         |               |
| 115In (KED) | 105.609 %             | 899,797 cps       |               |
| 133Cs (KED) | 0.024 ppb             | 800 cps           |               |
| 138Ba (KED) | 1.774 ppb             | 81,354 cps        |               |
| 139La (KED) | 0.118 ppb             | 11,545 cps        |               |
| 140Ce (KED) | 0.258 ppb             | 33,749 cps        |               |
| 141Pr (KED) | 0.030 ppb             | 4,041 cps         |               |
| 142Nd (KED) | 0.156 ppb             | 8,546 cps         |               |
| 152Sm (KED) | 0.022 ppb             | 1,083 cps         |               |
| 153Eu (KED) | 0.004 ppb             | 397 cps           |               |
| 158Gd (KED) | 0.017 ppb             | 1,160 cps         |               |
| 159Tb (KED) | 105.296 %             | 4,989,617 cps     |               |
| 164Dy (KED) | 0.011 ppb             | 857 cps           |               |
| 166Er (KED) | 0.003 ppb             | 707 cps           |               |
| 169Tm (KED) | 0.001 ppb             | 233 cps           |               |
| 174Yb (KED) | 0.005 ppb             | 507 cps           |               |
| 175Lu (KED) | -0.115 ppb            | 17,122 cps        |               |
| 205Tl (KED) | 0.003 ppb             | 653 cps           |               |
| 208Pb (KED) | 0.844 ppb             | 120,977 cps       |               |
| 209Bi (KED) | 98.744 %              | 3,516,969 cps     |               |
| 232Th (KED) | 0.033 ppb             | 9,117 cps         |               |
| 238U (KED)  | 0.008 ppb             | 2,810 cps         |               |

## Sample Summary

Instrument ID: iCAP Q

Analysis index: 40

Analysis name: 80037jian

Analysis started at: 10/28/2021 4:47:54 PM

User name: WINDOWS-UPCI4ER\Administrator

| Category    | Concentration average | Concentration RSD |
|-------------|-----------------------|-------------------|
| 6Li (KED)   | 107.875 %             |                   |
| 9Be (KED)   | 0.022 ppb             |                   |
| 11B (KED)   | 6.960 ppb             |                   |
| 24Mg (KED)  | 105.811 ppb           |                   |
| 27Al (KED)  | 127.033 ppb           |                   |
| 45Sc (KED)  | 111.107 %             |                   |
| 51V (KED)   | 0.267 ppb             |                   |
| 52Cr (KED)  | 1.443 ppb             |                   |
| 55Mn (KED)  | 5.184 ppb             |                   |
| 56Fe (KED)  | 165.317 ppb           |                   |
| 58Ni (KED)  | 1.138 ppb             |                   |
| 59Co (KED)  | 0.089 ppb             |                   |
| 63Cu (KED)  | 3.565 ppb             |                   |
| 64Zn (KED)  | 60.042 ppb            |                   |
| 69Ga (KED)  | 0.581 ppb             |                   |
| 75As (KED)  | 0.236 ppb             |                   |
| 80Se (KED)  | 0.162 ppb             |                   |
| 85Rb (KED)  | 0.587 ppb             |                   |
| 88Sr (KED)  | 1.594 ppb             |                   |
| 89Y (KED)   | 106.080 %             |                   |
| 107Ag (KED) | 0.013 ppb             |                   |
| 114Cd (KED) | 0.054 ppb             |                   |
| 115In (KED) | 104.139 %             |                   |
| 133Cs (KED) | 0.027 ppb             |                   |
| 138Ba (KED) | 1.982 ppb             |                   |
| 139La (KED) | 0.139 ppb             |                   |
| 140Ce (KED) | 0.280 ppb             |                   |
| 141Pr (KED) | 0.034 ppb             |                   |
| 142Nd (KED) | 0.180 ppb             |                   |
| 152Sm (KED) | 0.024 ppb             |                   |
| 153Eu (KED) | 0.004 ppb             |                   |
| 158Gd (KED) | 0.022 ppb             |                   |
| 159Tb (KED) | 106.421 %             |                   |
| 164Dy (KED) | 0.015 ppb             |                   |
| 166Er (KED) | 0.005 ppb             |                   |
| 169Tm (KED) | 0.001 ppb             |                   |
| 174Yb (KED) | 0.005 ppb             |                   |
| 175Lu (KED) | -0.113 ppb            |                   |
| 205Tl (KED) | 0.003 ppb             |                   |
| 208Pb (KED) | 0.665 ppb             |                   |
| 209Bi (KED) | 97.829 %              |                   |
| 232Th (KED) | 0.040 ppb             |                   |
| 238U (KED)  | 0.011 ppb             |                   |

| Category   | Concentration average | Intensity average | Intensity RSD |
|------------|-----------------------|-------------------|---------------|
| 6Li (KED)  | 107.875 %             | 3,304 cps         |               |
| 9Be (KED)  | 0.022 ppb             | 3 cps             |               |
| 11B (KED)  | 6.960 ppb             | 1,177 cps         |               |
| 24Mg (KED) | 105.811 ppb           | 66,409 cps        |               |
| 27Al (KED) | 127.033 ppb           | 20,490 cps        |               |

| Category    | Concentration average | Intensity average | Intensity RSD |
|-------------|-----------------------|-------------------|---------------|
| 45Sc (KED)  | 111.107 %             | 57,884 cps        |               |
| 51V (KED)   | 0.267 ppb             | 2,737 cps         |               |
| 52Cr (KED)  | 1.443 ppb             | 23,205 cps        |               |
| 55Mn (KED)  | 5.184 ppb             | 41,686 cps        |               |
| 56Fe (KED)  | 165.317 ppb           | 2,417,607 cps     |               |
| 58Ni (KED)  | 1.138 ppb             | 21,702 cps        |               |
| 59Co (KED)  | 0.089 ppb             | 2,814 cps         |               |
| 63Cu (KED)  | 3.565 ppb             | 79,512 cps        |               |
| 64Zn (KED)  | 60.042 ppb            | 287,595 cps       |               |
| 69Ga (KED)  | 0.581 ppb             | 4,301 cps         |               |
| 75As (KED)  | 0.236 ppb             | 363 cps           |               |
| 80Se (KED)  | 0.162 ppb             | 1,317 cps         |               |
| 85Rb (KED)  | 0.587 ppb             | 4,031 cps         |               |
| 88Sr (KED)  | 1.594 ppb             | 15,503 cps        |               |
| 89Y (KED)   | 106.080 %             | 510,288 cps       |               |
| 107Ag (KED) | 0.013 ppb             | 817 cps           |               |
| 114Cd (KED) | 0.054 ppb             | 1,033 cps         |               |
| 115In (KED) | 104.139 %             | 887,274 cps       |               |
| 133Cs (KED) | 0.027 ppb             | 890 cps           |               |
| 138Ba (KED) | 1.982 ppb             | 91,773 cps        |               |
| 139La (KED) | 0.139 ppb             | 13,704 cps        |               |
| 140Ce (KED) | 0.280 ppb             | 37,022 cps        |               |
| 141Pr (KED) | 0.034 ppb             | 4,734 cps         |               |
| 142Nd (KED) | 0.180 ppb             | 9,937 cps         |               |
| 152Sm (KED) | 0.024 ppb             | 1,200 cps         |               |
| 153Eu (KED) | 0.004 ppb             | 420 cps           |               |
| 158Gd (KED) | 0.022 ppb             | 1,533 cps         |               |
| 159Tb (KED) | 106.421 %             | 5,042,941 cps     |               |
| 164Dy (KED) | 0.015 ppb             | 1,133 cps         |               |
| 166Er (KED) | 0.005 ppb             | 930 cps           |               |
| 169Tm (KED) | 0.001 ppb             | 257 cps           |               |
| 174Yb (KED) | 0.005 ppb             | 583 cps           |               |
| 175Lu (KED) | -0.113 ppb            | 17,683 cps        |               |
| 205Tl (KED) | 0.003 ppb             | 707 cps           |               |
| 208Pb (KED) | 0.665 ppb             | 95,195 cps        |               |
| 209Bi (KED) | 97.829 %              | 3,484,390 cps     |               |
| 232Th (KED) | 0.040 ppb             | 10,938 cps        |               |
| 238U (KED)  | 0.011 ppb             | 3,497 cps         |               |

## Sample Summary

Instrument ID: iCAP Q

Analysis index: 41

Analysis name: 801081jian

Analysis started at: 10/28/2021 4:49:55 PM

User name: WINDOWS-UPCI4ER\Administrator

| Category    | Concentration average | Concentration RSD |
|-------------|-----------------------|-------------------|
| 6Li (KED)   | 107.112 %             |                   |
| 9Be (KED)   | 0.022 ppb             |                   |
| 11B (KED)   | 3.946 ppb             |                   |
| 24Mg (KED)  | 132.866 ppb           |                   |
| 27Al (KED)  | 232.008 ppb           |                   |
| 45Sc (KED)  | 110.477 %             |                   |
| 51V (KED)   | 0.483 ppb             |                   |
| 52Cr (KED)  | 1.295 ppb             |                   |
| 55Mn (KED)  | 6.693 ppb             |                   |
| 56Fe (KED)  | 302.771 ppb           |                   |
| 58Ni (KED)  | 1.825 ppb             |                   |
| 59Co (KED)  | 0.119 ppb             |                   |
| 63Cu (KED)  | 3.270 ppb             |                   |
| 64Zn (KED)  | 56.877 ppb            |                   |
| 69Ga (KED)  | 0.789 ppb             |                   |
| 75As (KED)  | 0.140 ppb             |                   |
| 80Se (KED)  | -0.017 ppb            |                   |
| 85Rb (KED)  | 0.764 ppb             |                   |
| 88Sr (KED)  | 1.664 ppb             |                   |
| 89Y (KED)   | 107.736 %             |                   |
| 107Ag (KED) | 0.030 ppb             |                   |
| 114Cd (KED) | 0.060 ppb             |                   |
| 115In (KED) | 106.262 %             |                   |
| 133Cs (KED) | 0.043 ppb             |                   |
| 138Ba (KED) | 2.650 ppb             |                   |
| 139La (KED) | 0.230 ppb             |                   |
| 140Ce (KED) | 0.487 ppb             |                   |
| 141Pr (KED) | 0.055 ppb             |                   |
| 142Nd (KED) | 0.284 ppb             |                   |
| 152Sm (KED) | 0.039 ppb             |                   |
| 153Eu (KED) | 0.008 ppb             |                   |
| 158Gd (KED) | 0.035 ppb             |                   |
| 159Tb (KED) | 106.164 %             |                   |
| 164Dy (KED) | 0.026 ppb             |                   |
| 166Er (KED) | 0.010 ppb             |                   |
| 169Tm (KED) | 0.002 ppb             |                   |
| 174Yb (KED) | 0.010 ppb             |                   |
| 175Lu (KED) | -0.108 ppb            |                   |
| 205Tl (KED) | 0.005 ppb             |                   |
| 208Pb (KED) | 0.726 ppb             |                   |
| 209Bi (KED) | 98.828 %              |                   |
| 232Th (KED) | 0.068 ppb             |                   |
| 238U (KED)  | 0.016 ppb             |                   |

| Category   | Concentration average | Intensity average | Intensity RSD |
|------------|-----------------------|-------------------|---------------|
| 6Li (KED)  | 107.112 %             | 3,280 cps         |               |
| 9Be (KED)  | 0.022 ppb             | 3 cps             |               |
| 11B (KED)  | 3.946 ppb             | 917 cps           |               |
| 24Mg (KED) | 132.866 ppb           | 82,763 cps        |               |
| 27Al (KED) | 232.008 ppb           | 37,139 cps        |               |

| Category    | Concentration average | Intensity average | Intensity RSD |
|-------------|-----------------------|-------------------|---------------|
| 45Sc (KED)  | 110.477 %             | 57,556 cps        |               |
| 51V (KED)   | 0.483 ppb             | 4,928 cps         |               |
| 52Cr (KED)  | 1.295 ppb             | 20,707 cps        |               |
| 55Mn (KED)  | 6.693 ppb             | 53,498 cps        |               |
| 56Fe (KED)  | 302.771 ppb           | 4,400,769 cps     |               |
| 58Ni (KED)  | 1.825 ppb             | 34,411 cps        |               |
| 59Co (KED)  | 0.119 ppb             | 3,741 cps         |               |
| 63Cu (KED)  | 3.270 ppb             | 74,263 cps        |               |
| 64Zn (KED)  | 56.877 ppb            | 276,804 cps       |               |
| 69Ga (KED)  | 0.789 ppb             | 5,921 cps         |               |
| 75As (KED)  | 0.140 ppb             | 223 cps           |               |
| 80Se (KED)  | -0.017 ppb            | 1,257 cps         |               |
| 85Rb (KED)  | 0.764 ppb             | 5,324 cps         |               |
| 88Sr (KED)  | 1.664 ppb             | 16,437 cps        |               |
| 89Y (KED)   | 107.736 %             | 518,255 cps       |               |
| 107Ag (KED) | 0.030 ppb             | 1,850 cps         |               |
| 114Cd (KED) | 0.060 ppb             | 1,167 cps         |               |
| 115In (KED) | 106.262 %             | 905,362 cps       |               |
| 133Cs (KED) | 0.043 ppb             | 1,410 cps         |               |
| 138Ba (KED) | 2.650 ppb             | 122,192 cps       |               |
| 139La (KED) | 0.230 ppb             | 22,597 cps        |               |
| 140Ce (KED) | 0.487 ppb             | 64,215 cps        |               |
| 141Pr (KED) | 0.055 ppb             | 7,566 cps         |               |
| 142Nd (KED) | 0.284 ppb             | 15,650 cps        |               |
| 152Sm (KED) | 0.039 ppb             | 1,967 cps         |               |
| 153Eu (KED) | 0.008 ppb             | 837 cps           |               |
| 158Gd (KED) | 0.035 ppb             | 2,384 cps         |               |
| 159Tb (KED) | 106.164 %             | 5,030,730 cps     |               |
| 164Dy (KED) | 0.026 ppb             | 1,990 cps         |               |
| 166Er (KED) | 0.010 ppb             | 1,340 cps         |               |
| 169Tm (KED) | 0.002 ppb             | 467 cps           |               |
| 174Yb (KED) | 0.010 ppb             | 1,067 cps         |               |
| 175Lu (KED) | -0.108 ppb            | 18,441 cps        |               |
| 205Tl (KED) | 0.005 ppb             | 1,067 cps         |               |
| 208Pb (KED) | 0.726 ppb             | 104,644 cps       |               |
| 209Bi (KED) | 98.828 %              | 3,519,978 cps     |               |
| 232Th (KED) | 0.068 ppb             | 18,771 cps        |               |
| 238U (KED)  | 0.016 ppb             | 5,271 cps         |               |

## Sample Summary

Instrument ID: iCAP Q

Analysis index: 42

Analysis name: 80161jian

Analysis started at: 10/28/2021 4:51:46 PM

User name: WINDOWS-UPCI4ER\Administrator

| Category    | Concentration average | Concentration RSD |
|-------------|-----------------------|-------------------|
| 6Li (KED)   | 115.713 %             |                   |
| 9Be (KED)   | 0.000 ppb             |                   |
| 11B (KED)   | -0.639 ppb            |                   |
| 24Mg (KED)  | 69.984 ppb            |                   |
| 27Al (KED)  | 93.347 ppb            |                   |
| 45Sc (KED)  | 111.126 %             |                   |
| 51V (KED)   | 0.170 ppb             |                   |
| 52Cr (KED)  | 0.768 ppb             |                   |
| 55Mn (KED)  | 2.894 ppb             |                   |
| 56Fe (KED)  | 89.359 ppb            |                   |
| 58Ni (KED)  | 0.718 ppb             |                   |
| 59Co (KED)  | 0.050 ppb             |                   |
| 63Cu (KED)  | 2.031 ppb             |                   |
| 64Zn (KED)  | 51.356 ppb            |                   |
| 69Ga (KED)  | 0.419 ppb             |                   |
| 75As (KED)  | 0.060 ppb             |                   |
| 80Se (KED)  | 0.075 ppb             |                   |
| 85Rb (KED)  | 0.573 ppb             |                   |
| 88Sr (KED)  | 0.901 ppb             |                   |
| 89Y (KED)   | 105.416 %             |                   |
| 107Ag (KED) | 0.015 ppb             |                   |
| 114Cd (KED) | 0.035 ppb             |                   |
| 115In (KED) | 106.194 %             |                   |
| 133Cs (KED) | 0.016 ppb             |                   |
| 138Ba (KED) | 1.361 ppb             |                   |
| 139La (KED) | 0.080 ppb             |                   |
| 140Ce (KED) | 0.169 ppb             |                   |
| 141Pr (KED) | 0.019 ppb             |                   |
| 142Nd (KED) | 0.103 ppb             |                   |
| 152Sm (KED) | 0.014 ppb             |                   |
| 153Eu (KED) | 0.003 ppb             |                   |
| 158Gd (KED) | 0.012 ppb             |                   |
| 159Tb (KED) | 105.473 %             |                   |
| 164Dy (KED) | 0.007 ppb             |                   |
| 166Er (KED) | 0.001 ppb             |                   |
| 169Tm (KED) | 0.000 ppb             |                   |
| 174Yb (KED) | 0.003 ppb             |                   |
| 175Lu (KED) | -0.106 ppb            |                   |
| 205Tl (KED) | 0.002 ppb             |                   |
| 208Pb (KED) | 0.305 ppb             |                   |
| 209Bi (KED) | 100.630 %             |                   |
| 232Th (KED) | 0.023 ppb             |                   |
| 238U (KED)  | 0.006 ppb             |                   |

| Category   | Concentration average | Intensity average | Intensity RSD |
|------------|-----------------------|-------------------|---------------|
| 6Li (KED)  | 115.713 %             | 3,544 cps         |               |
| 9Be (KED)  | 0.000 ppb             | 0 cps             |               |
| 11B (KED)  | -0.639 ppb            | 577 cps           |               |
| 24Mg (KED) | 69.984 ppb            | 47,169 cps        |               |
| 27Al (KED) | 93.347 ppb            | 15,082 cps        |               |

| Category    | Concentration average | Intensity average | Intensity RSD |
|-------------|-----------------------|-------------------|---------------|
| 45Sc (KED)  | 111.126 %             | 57,894 cps        |               |
| 51V (KED)   | 0.170 ppb             | 1,750 cps         |               |
| 52Cr (KED)  | 0.768 ppb             | 12,379 cps        |               |
| 55Mn (KED)  | 2.894 ppb             | 23,298 cps        |               |
| 56Fe (KED)  | 89.359 ppb            | 1,308,049 cps     |               |
| 58Ni (KED)  | 0.718 ppb             | 13,808 cps        |               |
| 59Co (KED)  | 0.050 ppb             | 1,597 cps         |               |
| 63Cu (KED)  | 2.031 ppb             | 45,934 cps        |               |
| 64Zn (KED)  | 51.356 ppb            | 244,754 cps       |               |
| 69Ga (KED)  | 0.419 ppb             | 3,094 cps         |               |
| 75As (KED)  | 0.060 ppb             | 100 cps           |               |
| 80Se (KED)  | 0.075 ppb             | 1,270 cps         |               |
| 85Rb (KED)  | 0.573 ppb             | 3,911 cps         |               |
| 88Sr (KED)  | 0.901 ppb             | 8,750 cps         |               |
| 89Y (KED)   | 105.416 %             | 507,094 cps       |               |
| 107Ag (KED) | 0.015 ppb             | 953 cps           |               |
| 114Cd (KED) | 0.035 ppb             | 697 cps           |               |
| 115In (KED) | 106.194 %             | 904,781 cps       |               |
| 133Cs (KED) | 0.016 ppb             | 527 cps           |               |
| 138Ba (KED) | 1.361 ppb             | 62,660 cps        |               |
| 139La (KED) | 0.080 ppb             | 7,802 cps         |               |
| 140Ce (KED) | 0.169 ppb             | 22,183 cps        |               |
| 141Pr (KED) | 0.019 ppb             | 2,544 cps         |               |
| 142Nd (KED) | 0.103 ppb             | 5,625 cps         |               |
| 152Sm (KED) | 0.014 ppb             | 693 cps           |               |
| 153Eu (KED) | 0.003 ppb             | 277 cps           |               |
| 158Gd (KED) | 0.012 ppb             | 843 cps           |               |
| 159Tb (KED) | 105.473 %             | 4,998,019 cps     |               |
| 164Dy (KED) | 0.007 ppb             | 577 cps           |               |
| 166Er (KED) | 0.001 ppb             | 573 cps           |               |
| 169Tm (KED) | 0.000 ppb             | 157 cps           |               |
| 174Yb (KED) | 0.003 ppb             | 350 cps           |               |
| 175Lu (KED) | -0.106 ppb            | 18,734 cps        |               |
| 205Tl (KED) | 0.002 ppb             | 447 cps           |               |
| 208Pb (KED) | 0.305 ppb             | 47,266 cps        |               |
| 209Bi (KED) | 100.630 %             | 3,584,147 cps     |               |
| 232Th (KED) | 0.023 ppb             | 6,398 cps         |               |
| 238U (KED)  | 0.006 ppb             | 1,990 cps         |               |

## Sample Summary

Instrument ID: iCAP Q

Analysis index: 43

Analysis name: 605134jian

Analysis started at: 10/28/2021 4:53:35 PM

User name: WINDOWS-UPCI4ER\Administrator

| Category    | Concentration average | Concentration RSD |
|-------------|-----------------------|-------------------|
| 6Li (KED)   | 107.548 %             |                   |
| 9Be (KED)   | 0.000 ppb             |                   |
| 11B (KED)   | 13.205 ppb            |                   |
| 24Mg (KED)  | 98.362 ppb            |                   |
| 27Al (KED)  | 180.845 ppb           |                   |
| 45Sc (KED)  | 107.990 %             |                   |
| 51V (KED)   | 0.277 ppb             |                   |
| 52Cr (KED)  | 0.786 ppb             |                   |
| 55Mn (KED)  | 5.499 ppb             |                   |
| 56Fe (KED)  | 168.736 ppb           |                   |
| 58Ni (KED)  | 1.072 ppb             |                   |
| 59Co (KED)  | 0.089 ppb             |                   |
| 63Cu (KED)  | 2.962 ppb             |                   |
| 64Zn (KED)  | 57.345 ppb            |                   |
| 69Ga (KED)  | 0.609 ppb             |                   |
| 75As (KED)  | 0.325 ppb             |                   |
| 80Se (KED)  | 0.349 ppb             |                   |
| 85Rb (KED)  | 0.432 ppb             |                   |
| 88Sr (KED)  | 1.461 ppb             |                   |
| 89Y (KED)   | 103.582 %             |                   |
| 107Ag (KED) | 0.036 ppb             |                   |
| 114Cd (KED) | 0.036 ppb             |                   |
| 115In (KED) | 101.658 %             |                   |
| 133Cs (KED) | 0.030 ppb             |                   |
| 138Ba (KED) | 1.974 ppb             |                   |
| 139La (KED) | 0.151 ppb             |                   |
| 140Ce (KED) | 0.316 ppb             |                   |
| 141Pr (KED) | 0.036 ppb             |                   |
| 142Nd (KED) | 0.208 ppb             |                   |
| 152Sm (KED) | 0.025 ppb             |                   |
| 153Eu (KED) | 0.006 ppb             |                   |
| 158Gd (KED) | 0.023 ppb             |                   |
| 159Tb (KED) | 103.918 %             |                   |
| 164Dy (KED) | 0.016 ppb             |                   |
| 166Er (KED) | 0.004 ppb             |                   |
| 169Tm (KED) | 0.001 ppb             |                   |
| 174Yb (KED) | 0.006 ppb             |                   |
| 175Lu (KED) | -0.108 ppb            |                   |
| 205Tl (KED) | 0.004 ppb             |                   |
| 208Pb (KED) | 0.530 ppb             |                   |
| 209Bi (KED) | 98.297 %              |                   |
| 232Th (KED) | 0.045 ppb             |                   |
| 238U (KED)  | 0.012 ppb             |                   |

| Category   | Concentration average | Intensity average | Intensity RSD |
|------------|-----------------------|-------------------|---------------|
| 6Li (KED)  | 107.548 %             | 3,294 cps         |               |
| 9Be (KED)  | 0.000 ppb             | 0 cps             |               |
| 11B (KED)  | 13.205 ppb            | 1,697 cps         |               |
| 24Mg (KED) | 98.362 ppb            | 61,558 cps        |               |
| 27Al (KED) | 180.845 ppb           | 28,315 cps        |               |

| Category    | Concentration average | Intensity average | Intensity RSD |
|-------------|-----------------------|-------------------|---------------|
| 45Sc (KED)  | 107.990 %             | 56,260 cps        |               |
| 51V (KED)   | 0.277 ppb             | 2,760 cps         |               |
| 52Cr (KED)  | 0.786 ppb             | 12,306 cps        |               |
| 55Mn (KED)  | 5.499 ppb             | 42,974 cps        |               |
| 56Fe (KED)  | 168.736 ppb           | 2,398,320 cps     |               |
| 58Ni (KED)  | 1.072 ppb             | 19,886 cps        |               |
| 59Co (KED)  | 0.089 ppb             | 2,737 cps         |               |
| 63Cu (KED)  | 2.962 ppb             | 64,861 cps        |               |
| 64Zn (KED)  | 57.345 ppb            | 268,302 cps       |               |
| 69Ga (KED)  | 0.609 ppb             | 4,401 cps         |               |
| 75As (KED)  | 0.325 ppb             | 483 cps           |               |
| 80Se (KED)  | 0.349 ppb             | 1,367 cps         |               |
| 85Rb (KED)  | 0.432 ppb             | 2,900 cps         |               |
| 88Sr (KED)  | 1.461 ppb             | 13,888 cps        |               |
| 89Y (KED)   | 103.582 %             | 498,275 cps       |               |
| 107Ag (KED) | 0.036 ppb             | 2,114 cps         |               |
| 114Cd (KED) | 0.036 ppb             | 683 cps           |               |
| 115In (KED) | 101.658 %             | 866,138 cps       |               |
| 133Cs (KED) | 0.030 ppb             | 947 cps           |               |
| 138Ba (KED) | 1.974 ppb             | 89,275 cps        |               |
| 139La (KED) | 0.151 ppb             | 14,535 cps        |               |
| 140Ce (KED) | 0.316 ppb             | 40,887 cps        |               |
| 141Pr (KED) | 0.036 ppb             | 4,908 cps         |               |
| 142Nd (KED) | 0.208 ppb             | 11,242 cps        |               |
| 152Sm (KED) | 0.025 ppb             | 1,230 cps         |               |
| 153Eu (KED) | 0.006 ppb             | 573 cps           |               |
| 158Gd (KED) | 0.023 ppb             | 1,527 cps         |               |
| 159Tb (KED) | 103.918 %             | 4,924,306 cps     |               |
| 164Dy (KED) | 0.016 ppb             | 1,200 cps         |               |
| 166Er (KED) | 0.004 ppb             | 857 cps           |               |
| 169Tm (KED) | 0.001 ppb             | 307 cps           |               |
| 174Yb (KED) | 0.006 ppb             | 660 cps           |               |
| 175Lu (KED) | -0.108 ppb            | 18,020 cps        |               |
| 205Tl (KED) | 0.004 ppb             | 753 cps           |               |
| 208Pb (KED) | 0.530 ppb             | 77,057 cps        |               |
| 209Bi (KED) | 98.297 %              | 3,501,062 cps     |               |
| 232Th (KED) | 0.045 ppb             | 12,473 cps        |               |
| 238U (KED)  | 0.012 ppb             | 4,021 cps         |               |

## Sample Summary

Instrument ID: iCAP Q

Analysis index: 44

Analysis name: 605271jian

Analysis started at: 10/28/2021 4:55:29 PM

User name: WINDOWS-UPCI4ER\Administrator

| Category    | Concentration average | Concentration RSD |
|-------------|-----------------------|-------------------|
| 6Li (KED)   | 107.439 %             |                   |
| 9Be (KED)   | 0.000 ppb             |                   |
| 11B (KED)   | 2.878 ppb             |                   |
| 24Mg (KED)  | 86.043 ppb            |                   |
| 27Al (KED)  | 138.426 ppb           |                   |
| 45Sc (KED)  | 110.143 %             |                   |
| 51V (KED)   | 0.239 ppb             |                   |
| 52Cr (KED)  | 0.750 ppb             |                   |
| 55Mn (KED)  | 4.505 ppb             |                   |
| 56Fe (KED)  | 143.556 ppb           |                   |
| 58Ni (KED)  | 1.000 ppb             |                   |
| 59Co (KED)  | 0.071 ppb             |                   |
| 63Cu (KED)  | 2.237 ppb             |                   |
| 64Zn (KED)  | 52.680 ppb            |                   |
| 69Ga (KED)  | 0.474 ppb             |                   |
| 75As (KED)  | 0.123 ppb             |                   |
| 80Se (KED)  | 0.466 ppb             |                   |
| 85Rb (KED)  | 0.324 ppb             |                   |
| 88Sr (KED)  | 1.064 ppb             |                   |
| 89Y (KED)   | 108.875 %             |                   |
| 107Ag (KED) | 0.010 ppb             |                   |
| 114Cd (KED) | 0.041 ppb             |                   |
| 115In (KED) | 105.961 %             |                   |
| 133Cs (KED) | 0.025 ppb             |                   |
| 138Ba (KED) | 1.615 ppb             |                   |
| 139La (KED) | 0.122 ppb             |                   |
| 140Ce (KED) | 0.258 ppb             |                   |
| 141Pr (KED) | 0.030 ppb             |                   |
| 142Nd (KED) | 0.160 ppb             |                   |
| 152Sm (KED) | 0.022 ppb             |                   |
| 153Eu (KED) | 0.004 ppb             |                   |
| 158Gd (KED) | 0.019 ppb             |                   |
| 159Tb (KED) | 106.933 %             |                   |
| 164Dy (KED) | 0.013 ppb             |                   |
| 166Er (KED) | 0.004 ppb             |                   |
| 169Tm (KED) | 0.001 ppb             |                   |
| 174Yb (KED) | 0.005 ppb             |                   |
| 175Lu (KED) | -0.115 ppb            |                   |
| 205Tl (KED) | 0.004 ppb             |                   |
| 208Pb (KED) | 0.434 ppb             |                   |
| 209Bi (KED) | 99.213 %              |                   |
| 232Th (KED) | 0.037 ppb             |                   |
| 238U (KED)  | 0.009 ppb             |                   |

| Category   | Concentration average | Intensity average | Intensity RSD |
|------------|-----------------------|-------------------|---------------|
| 6Li (KED)  | 107.439 %             | 3,290 cps         |               |
| 9Be (KED)  | 0.000 ppb             | 0 cps             |               |
| 11B (KED)  | 2.878 ppb             | 830 cps           |               |
| 24Mg (KED) | 86.043 ppb            | 53,812 cps        |               |
| 27Al (KED) | 138.426 ppb           | 22,126 cps        |               |

| Category    | Concentration average | Intensity average | Intensity RSD |
|-------------|-----------------------|-------------------|---------------|
| 45Sc (KED)  | 110.143 %             | 57,381 cps        |               |
| 51V (KED)   | 0.239 ppb             | 2,434 cps         |               |
| 52Cr (KED)  | 0.750 ppb             | 11,986 cps        |               |
| 55Mn (KED)  | 4.505 ppb             | 35,912 cps        |               |
| 56Fe (KED)  | 143.556 ppb           | 2,081,437 cps     |               |
| 58Ni (KED)  | 1.000 ppb             | 18,941 cps        |               |
| 59Co (KED)  | 0.071 ppb             | 2,224 cps         |               |
| 63Cu (KED)  | 2.237 ppb             | 52,038 cps        |               |
| 64Zn (KED)  | 52.680 ppb            | 259,248 cps       |               |
| 69Ga (KED)  | 0.474 ppb             | 3,607 cps         |               |
| 75As (KED)  | 0.123 ppb             | 200 cps           |               |
| 80Se (KED)  | 0.466 ppb             | 1,490 cps         |               |
| 85Rb (KED)  | 0.324 ppb             | 2,290 cps         |               |
| 88Sr (KED)  | 1.064 ppb             | 10,651 cps        |               |
| 89Y (KED)   | 108.875 %             | 523,736 cps       |               |
| 107Ag (KED) | 0.010 ppb             | 670 cps           |               |
| 114Cd (KED) | 0.041 ppb             | 800 cps           |               |
| 115In (KED) | 105.961 %             | 902,801 cps       |               |
| 133Cs (KED) | 0.025 ppb             | 813 cps           |               |
| 138Ba (KED) | 1.615 ppb             | 75,270 cps        |               |
| 139La (KED) | 0.122 ppb             | 12,123 cps        |               |
| 140Ce (KED) | 0.258 ppb             | 34,274 cps        |               |
| 141Pr (KED) | 0.030 ppb             | 4,117 cps         |               |
| 142Nd (KED) | 0.160 ppb             | 8,870 cps         |               |
| 152Sm (KED) | 0.022 ppb             | 1,120 cps         |               |
| 153Eu (KED) | 0.004 ppb             | 460 cps           |               |
| 158Gd (KED) | 0.019 ppb             | 1,280 cps         |               |
| 159Tb (KED) | 106.933 %             | 5,067,195 cps     |               |
| 164Dy (KED) | 0.013 ppb             | 997 cps           |               |
| 166Er (KED) | 0.004 ppb             | 860 cps           |               |
| 169Tm (KED) | 0.001 ppb             | 247 cps           |               |
| 174Yb (KED) | 0.005 ppb             | 573 cps           |               |
| 175Lu (KED) | -0.115 ppb            | 17,349 cps        |               |
| 205Tl (KED) | 0.004 ppb             | 833 cps           |               |
| 208Pb (KED) | 0.434 ppb             | 64,476 cps        |               |
| 209Bi (KED) | 99.213 %              | 3,533,696 cps     |               |
| 232Th (KED) | 0.037 ppb             | 10,184 cps        |               |
| 238U (KED)  | 0.009 ppb             | 3,150 cps         |               |

## Sample Summary

Instrument ID: iCAP Q

Analysis index: 45

Analysis name: 80144jian

Analysis started at: 10/28/2021 4:57:23 PM

User name: WINDOWS-UPCI4ER\Administrator

| Category    | Concentration average | Concentration RSD |
|-------------|-----------------------|-------------------|
| 6Li (KED)   | 108.201 %             |                   |
| 9Be (KED)   | 0.000 ppb             |                   |
| 11B (KED)   | 1.504 ppb             |                   |
| 24Mg (KED)  | 85.313 ppb            |                   |
| 27Al (KED)  | 122.167 ppb           |                   |
| 45Sc (KED)  | 107.495 %             |                   |
| 51V (KED)   | 0.266 ppb             |                   |
| 52Cr (KED)  | 1.029 ppb             |                   |
| 55Mn (KED)  | 4.359 ppb             |                   |
| 56Fe (KED)  | 148.045 ppb           |                   |
| 58Ni (KED)  | 1.021 ppb             |                   |
| 59Co (KED)  | 0.069 ppb             |                   |
| 63Cu (KED)  | 3.044 ppb             |                   |
| 64Zn (KED)  | 51.242 ppb            |                   |
| 69Ga (KED)  | 0.523 ppb             |                   |
| 75As (KED)  | 0.130 ppb             |                   |
| 80Se (KED)  | 0.256 ppb             |                   |
| 85Rb (KED)  | 0.601 ppb             |                   |
| 88Sr (KED)  | 1.203 ppb             |                   |
| 89Y (KED)   | 105.160 %             |                   |
| 107Ag (KED) | 0.026 ppb             |                   |
| 114Cd (KED) | 0.050 ppb             |                   |
| 115In (KED) | 101.452 %             |                   |
| 133Cs (KED) | 0.023 ppb             |                   |
| 138Ba (KED) | 1.737 ppb             |                   |
| 139La (KED) | 0.122 ppb             |                   |
| 140Ce (KED) | 0.251 ppb             |                   |
| 141Pr (KED) | 0.028 ppb             |                   |
| 142Nd (KED) | 0.167 ppb             |                   |
| 152Sm (KED) | 0.019 ppb             |                   |
| 153Eu (KED) | 0.005 ppb             |                   |
| 158Gd (KED) | 0.021 ppb             |                   |
| 159Tb (KED) | 103.730 %             |                   |
| 164Dy (KED) | 0.011 ppb             |                   |
| 166Er (KED) | 0.002 ppb             |                   |
| 169Tm (KED) | 0.001 ppb             |                   |
| 174Yb (KED) | 0.005 ppb             |                   |
| 175Lu (KED) | -0.110 ppb            |                   |
| 205Tl (KED) | 0.003 ppb             |                   |
| 208Pb (KED) | 0.488 ppb             |                   |
| 209Bi (KED) | 97.265 %              |                   |
| 232Th (KED) | 0.032 ppb             |                   |
| 238U (KED)  | 0.009 ppb             |                   |

| Category   | Concentration average | Intensity average | Intensity RSD |
|------------|-----------------------|-------------------|---------------|
| 6Li (KED)  | 108.201 %             | 3,314 cps         |               |
| 9Be (KED)  | 0.000 ppb             | 0 cps             |               |
| 11B (KED)  | 1.504 ppb             | 720 cps           |               |
| 24Mg (KED) | 85.313 ppb            | 53,735 cps        |               |
| 27Al (KED) | 122.167 ppb           | 19,068 cps        |               |

| Category    | Concentration average | Intensity average | Intensity RSD |
|-------------|-----------------------|-------------------|---------------|
| 45Sc (KED)  | 107.495 %             | 56,002 cps        |               |
| 51V (KED)   | 0.266 ppb             | 2,644 cps         |               |
| 52Cr (KED)  | 1.029 ppb             | 16,027 cps        |               |
| 55Mn (KED)  | 4.359 ppb             | 33,916 cps        |               |
| 56Fe (KED)  | 148.045 ppb           | 2,094,849 cps     |               |
| 58Ni (KED)  | 1.021 ppb             | 18,861 cps        |               |
| 59Co (KED)  | 0.069 ppb             | 2,100 cps         |               |
| 63Cu (KED)  | 3.044 ppb             | 67,623 cps        |               |
| 64Zn (KED)  | 51.242 ppb            | 243,626 cps       |               |
| 69Ga (KED)  | 0.523 ppb             | 3,841 cps         |               |
| 75As (KED)  | 0.130 ppb             | 203 cps           |               |
| 80Se (KED)  | 0.256 ppb             | 1,347 cps         |               |
| 85Rb (KED)  | 0.601 ppb             | 4,091 cps         |               |
| 88Sr (KED)  | 1.203 ppb             | 11,622 cps        |               |
| 89Y (KED)   | 105.160 %             | 505,864 cps       |               |
| 107Ag (KED) | 0.026 ppb             | 1,557 cps         |               |
| 114Cd (KED) | 0.050 ppb             | 930 cps           |               |
| 115In (KED) | 101.452 %             | 864,382 cps       |               |
| 133Cs (KED) | 0.023 ppb             | 737 cps           |               |
| 138Ba (KED) | 1.737 ppb             | 78,483 cps        |               |
| 139La (KED) | 0.122 ppb             | 11,726 cps        |               |
| 140Ce (KED) | 0.251 ppb             | 32,402 cps        |               |
| 141Pr (KED) | 0.028 ppb             | 3,694 cps         |               |
| 142Nd (KED) | 0.167 ppb             | 8,980 cps         |               |
| 152Sm (KED) | 0.019 ppb             | 953 cps           |               |
| 153Eu (KED) | 0.005 ppb             | 453 cps           |               |
| 158Gd (KED) | 0.021 ppb             | 1,417 cps         |               |
| 159Tb (KED) | 103.730 %             | 4,915,400 cps     |               |
| 164Dy (KED) | 0.011 ppb             | 867 cps           |               |
| 166Er (KED) | 0.002 ppb             | 677 cps           |               |
| 169Tm (KED) | 0.001 ppb             | 277 cps           |               |
| 174Yb (KED) | 0.005 ppb             | 557 cps           |               |
| 175Lu (KED) | -0.110 ppb            | 17,729 cps        |               |
| 205Tl (KED) | 0.003 ppb             | 620 cps           |               |
| 208Pb (KED) | 0.488 ppb             | 70,613 cps        |               |
| 209Bi (KED) | 97.265 %              | 3,464,287 cps     |               |
| 232Th (KED) | 0.032 ppb             | 8,776 cps         |               |
| 238U (KED)  | 0.009 ppb             | 3,007 cps         |               |

## Sample Summary

Instrument ID: iCAP Q

Analysis index: 46

Analysis name: 80076jian

Analysis started at: 10/28/2021 4:59:15 PM

User name: WINDOWS-UPCI4ER\Administrator

| Category    | Concentration average | Concentration RSD |
|-------------|-----------------------|-------------------|
| 6Li (KED)   | 55.403 %              |                   |
| 9Be (KED)   | 0.043 ppb             |                   |
| 11B (KED)   | 6.243 ppb             |                   |
| 24Mg (KED)  | 130.842 ppb           |                   |
| 27Al (KED)  | 183.219 ppb           |                   |
| 45Sc (KED)  | 55.396 %              |                   |
| 51V (KED)   | 0.336 ppb             |                   |
| 52Cr (KED)  | 1.381 ppb             |                   |
| 55Mn (KED)  | 6.647 ppb             |                   |
| 56Fe (KED)  | 181.409 ppb           |                   |
| 58Ni (KED)  | 1.428 ppb             |                   |
| 59Co (KED)  | 0.110 ppb             |                   |
| 63Cu (KED)  | 4.203 ppb             |                   |
| 64Zn (KED)  | 106.472 ppb           |                   |
| 69Ga (KED)  | 0.807 ppb             |                   |
| 75As (KED)  | 0.215 ppb             |                   |
| 80Se (KED)  | 3.958 ppb             |                   |
| 85Rb (KED)  | 1.282 ppb             |                   |
| 88Sr (KED)  | 1.861 ppb             |                   |
| 89Y (KED)   | 52.180 %              |                   |
| 107Ag (KED) | 0.060 ppb             |                   |
| 114Cd (KED) | 0.069 ppb             |                   |
| 115In (KED) | 53.518 %              |                   |
| 133Cs (KED) | 0.029 ppb             |                   |
| 138Ba (KED) | 2.852 ppb             |                   |
| 139La (KED) | 0.175 ppb             |                   |
| 140Ce (KED) | 0.357 ppb             |                   |
| 141Pr (KED) | 0.044 ppb             |                   |
| 142Nd (KED) | 0.221 ppb             |                   |
| 152Sm (KED) | 0.033 ppb             |                   |
| 153Eu (KED) | 0.005 ppb             |                   |
| 158Gd (KED) | 0.028 ppb             |                   |
| 159Tb (KED) | 49.137 %              |                   |
| 164Dy (KED) | 0.017 ppb             |                   |
| 166Er (KED) | 0.007 ppb             |                   |
| 169Tm (KED) | 0.001 ppb             |                   |
| 174Yb (KED) | 0.006 ppb             |                   |
| 175Lu (KED) | -0.108 ppb            |                   |
| 205Tl (KED) | 0.004 ppb             |                   |
| 208Pb (KED) | 0.705 ppb             |                   |
| 209Bi (KED) | 52.428 %              |                   |
| 232Th (KED) | 0.042 ppb             |                   |
| 238U (KED)  | 0.012 ppb             |                   |

| Category   | Concentration average | Intensity average | Intensity RSD |
|------------|-----------------------|-------------------|---------------|
| 6Li (KED)  | 55.403 %              | 1,697 cps         |               |
| 9Be (KED)  | 0.043 ppb             | 3 cps             |               |
| 11B (KED)  | 6.243 ppb             | 573 cps           |               |
| 24Mg (KED) | 130.842 ppb           | 42,158 cps        |               |
| 27Al (KED) | 183.219 ppb           | 14,715 cps        |               |

| Category    | Concentration average | Intensity average | Intensity RSD |
|-------------|-----------------------|-------------------|---------------|
| 45Sc (KED)  | 55.396 %              | 28,860 cps        |               |
| 51V (KED)   | 0.336 ppb             | 1,720 cps         |               |
| 52Cr (KED)  | 1.381 ppb             | 11,072 cps        |               |
| 55Mn (KED)  | 6.647 ppb             | 26,642 cps        |               |
| 56Fe (KED)  | 181.409 ppb           | 1,322,598 cps     |               |
| 58Ni (KED)  | 1.428 ppb             | 13,541 cps        |               |
| 59Co (KED)  | 0.110 ppb             | 1,737 cps         |               |
| 63Cu (KED)  | 4.203 ppb             | 45,924 cps        |               |
| 64Zn (KED)  | 106.472 ppb           | 250,052 cps       |               |
| 69Ga (KED)  | 0.807 ppb             | 2,930 cps         |               |
| 75As (KED)  | 0.215 ppb             | 163 cps           |               |
| 80Se (KED)  | 3.958 ppb             | 1,477 cps         |               |
| 85Rb (KED)  | 1.282 ppb             | 4,321 cps         |               |
| 88Sr (KED)  | 1.861 ppb             | 8,900 cps         |               |
| 89Y (KED)   | 52.180 %              | 251,010 cps       |               |
| 107Ag (KED) | 0.060 ppb             | 1,873 cps         |               |
| 114Cd (KED) | 0.069 ppb             | 677 cps           |               |
| 115In (KED) | 53.518 %              | 455,982 cps       |               |
| 133Cs (KED) | 0.029 ppb             | 483 cps           |               |
| 138Ba (KED) | 2.852 ppb             | 60,851 cps        |               |
| 139La (KED) | 0.175 ppb             | 7,959 cps         |               |
| 140Ce (KED) | 0.357 ppb             | 21,799 cps        |               |
| 141Pr (KED) | 0.044 ppb             | 2,767 cps         |               |
| 142Nd (KED) | 0.221 ppb             | 5,635 cps         |               |
| 152Sm (KED) | 0.033 ppb             | 770 cps           |               |
| 153Eu (KED) | 0.005 ppb             | 247 cps           |               |
| 158Gd (KED) | 0.028 ppb             | 873 cps           |               |
| 159Tb (KED) | 49.137 %              | 2,328,432 cps     |               |
| 164Dy (KED) | 0.017 ppb             | 610 cps           |               |
| 166Er (KED) | 0.007 ppb             | 497 cps           |               |
| 169Tm (KED) | 0.001 ppb             | 170 cps           |               |
| 174Yb (KED) | 0.006 ppb             | 323 cps           |               |
| 175Lu (KED) | -0.108 ppb            | 8,546 cps         |               |
| 205Tl (KED) | 0.004 ppb             | 477 cps           |               |
| 208Pb (KED) | 0.705 ppb             | 54,010 cps        |               |
| 209Bi (KED) | 52.428 %              | 1,867,327 cps     |               |
| 232Th (KED) | 0.042 ppb             | 6,235 cps         |               |
| 238U (KED)  | 0.012 ppb             | 2,040 cps         |               |

## Sample Summary

Instrument ID: iCAP Q

Analysis index: 47

Analysis name: 701321jian

Analysis started at: 10/28/2021 5:01:08 PM

User name: WINDOWS-UPCI4ER\Administrator

| Category    | Concentration average | Concentration RSD |
|-------------|-----------------------|-------------------|
| 6Li (KED)   | 56.165 %              |                   |
| 9Be (KED)   | 0.043 ppb             |                   |
| 11B (KED)   | 8.575 ppb             |                   |
| 24Mg (KED)  | 233.076 ppb           |                   |
| 27Al (KED)  | 177.031 ppb           |                   |
| 45Sc (KED)  | 56.833 %              |                   |
| 51V (KED)   | 0.331 ppb             |                   |
| 52Cr (KED)  | 1.365 ppb             |                   |
| 55Mn (KED)  | 6.071 ppb             |                   |
| 56Fe (KED)  | 204.152 ppb           |                   |
| 58Ni (KED)  | 1.469 ppb             |                   |
| 59Co (KED)  | 0.099 ppb             |                   |
| 63Cu (KED)  | 5.521 ppb             |                   |
| 64Zn (KED)  | 95.071 ppb            |                   |
| 69Ga (KED)  | 0.773 ppb             |                   |
| 75As (KED)  | 0.167 ppb             |                   |
| 80Se (KED)  | 3.051 ppb             |                   |
| 85Rb (KED)  | 0.943 ppb             |                   |
| 88Sr (KED)  | 1.705 ppb             |                   |
| 89Y (KED)   | 54.280 %              |                   |
| 107Ag (KED) | 0.019 ppb             |                   |
| 114Cd (KED) | 0.063 ppb             |                   |
| 115In (KED) | 53.123 %              |                   |
| 133Cs (KED) | 0.030 ppb             |                   |
| 138Ba (KED) | 2.683 ppb             |                   |
| 139La (KED) | 0.196 ppb             |                   |
| 140Ce (KED) | 0.414 ppb             |                   |
| 141Pr (KED) | 0.047 ppb             |                   |
| 142Nd (KED) | 0.249 ppb             |                   |
| 152Sm (KED) | 0.034 ppb             |                   |
| 153Eu (KED) | 0.007 ppb             |                   |
| 158Gd (KED) | 0.030 ppb             |                   |
| 159Tb (KED) | 51.413 %              |                   |
| 164Dy (KED) | 0.021 ppb             |                   |
| 166Er (KED) | 0.006 ppb             |                   |
| 169Tm (KED) | 0.001 ppb             |                   |
| 174Yb (KED) | 0.008 ppb             |                   |
| 175Lu (KED) | -0.111 ppb            |                   |
| 205Tl (KED) | 0.006 ppb             |                   |
| 208Pb (KED) | 1.010 ppb             |                   |
| 209Bi (KED) | 52.388 %              |                   |
| 232Th (KED) | 0.046 ppb             |                   |
| 238U (KED)  | 0.015 ppb             |                   |

| Category   | Concentration average | Intensity average | Intensity RSD |
|------------|-----------------------|-------------------|---------------|
| 6Li (KED)  | 56.165 %              | 1,720 cps         |               |
| 9Be (KED)  | 0.043 ppb             | 3 cps             |               |
| 11B (KED)  | 8.575 ppb             | 683 cps           |               |
| 24Mg (KED) | 233.076 ppb           | 76,071 cps        |               |
| 27Al (KED) | 177.031 ppb           | 14,589 cps        |               |

| Category    | Concentration average | Intensity average | Intensity RSD |
|-------------|-----------------------|-------------------|---------------|
| 45Sc (KED)  | 56.833 %              | 29,608 cps        |               |
| 51V (KED)   | 0.331 ppb             | 1,737 cps         |               |
| 52Cr (KED)  | 1.365 ppb             | 11,232 cps        |               |
| 55Mn (KED)  | 6.071 ppb             | 24,965 cps        |               |
| 56Fe (KED)  | 204.152 ppb           | 1,526,867 cps     |               |
| 58Ni (KED)  | 1.469 ppb             | 14,285 cps        |               |
| 59Co (KED)  | 0.099 ppb             | 1,600 cps         |               |
| 63Cu (KED)  | 5.521 ppb             | 62,412 cps        |               |
| 64Zn (KED)  | 95.071 ppb            | 232,379 cps       |               |
| 69Ga (KED)  | 0.773 ppb             | 2,924 cps         |               |
| 75As (KED)  | 0.167 ppb             | 133 cps           |               |
| 80Se (KED)  | 3.051 ppb             | 1,330 cps         |               |
| 85Rb (KED)  | 0.943 ppb             | 3,307 cps         |               |
| 88Sr (KED)  | 1.705 ppb             | 8,483 cps         |               |
| 89Y (KED)   | 54.280 %              | 261,111 cps       |               |
| 107Ag (KED) | 0.019 ppb             | 597 cps           |               |
| 114Cd (KED) | 0.063 ppb             | 613 cps           |               |
| 115In (KED) | 53.123 %              | 452,614 cps       |               |
| 133Cs (KED) | 0.030 ppb             | 493 cps           |               |
| 138Ba (KED) | 2.683 ppb             | 59,897 cps        |               |
| 139La (KED) | 0.196 ppb             | 9,360 cps         |               |
| 140Ce (KED) | 0.414 ppb             | 26,461 cps        |               |
| 141Pr (KED) | 0.047 ppb             | 3,130 cps         |               |
| 142Nd (KED) | 0.249 ppb             | 6,655 cps         |               |
| 152Sm (KED) | 0.034 ppb             | 837 cps           |               |
| 153Eu (KED) | 0.007 ppb             | 363 cps           |               |
| 158Gd (KED) | 0.030 ppb             | 987 cps           |               |
| 159Tb (KED) | 51.413 %              | 2,436,304 cps     |               |
| 164Dy (KED) | 0.021 ppb             | 787 cps           |               |
| 166Er (KED) | 0.006 ppb             | 507 cps           |               |
| 169Tm (KED) | 0.001 ppb             | 193 cps           |               |
| 174Yb (KED) | 0.008 ppb             | 430 cps           |               |
| 175Lu (KED) | -0.111 ppb            | 8,693 cps         |               |
| 205Tl (KED) | 0.006 ppb             | 700 cps           |               |
| 208Pb (KED) | 1.010 ppb             | 76,363 cps        |               |
| 209Bi (KED) | 52.388 %              | 1,865,927 cps     |               |
| 232Th (KED) | 0.046 ppb             | 6,752 cps         |               |
| 238U (KED)  | 0.015 ppb             | 2,587 cps         |               |

## Sample Summary

Instrument ID: iCAP Q

Analysis index: 48

Analysis name: 805045jian

Analysis started at: 10/28/2021 5:02:56 PM

User name: WINDOWS-UPCI4ER\Administrator

| Category    | Concentration average | Concentration RSD |
|-------------|-----------------------|-------------------|
| 6Li (KED)   | 54.750 %              |                   |
| 9Be (KED)   | 0.000 ppb             |                   |
| 11B (KED)   | 0.153 ppb             |                   |
| 24Mg (KED)  | 243.508 ppb           |                   |
| 27Al (KED)  | 449.027 ppb           |                   |
| 45Sc (KED)  | 53.793 %              |                   |
| 51V (KED)   | 0.845 ppb             |                   |
| 52Cr (KED)  | 1.920 ppb             |                   |
| 55Mn (KED)  | 13.836 ppb            |                   |
| 56Fe (KED)  | 440.705 ppb           |                   |
| 58Ni (KED)  | 2.958 ppb             |                   |
| 59Co (KED)  | 0.208 ppb             |                   |
| 63Cu (KED)  | 5.905 ppb             |                   |
| 64Zn (KED)  | 101.915 ppb           |                   |
| 69Ga (KED)  | 1.500 ppb             |                   |
| 75As (KED)  | 0.352 ppb             |                   |
| 80Se (KED)  | 2.759 ppb             |                   |
| 85Rb (KED)  | 1.341 ppb             |                   |
| 88Sr (KED)  | 3.339 ppb             |                   |
| 89Y (KED)   | 52.828 %              |                   |
| 107Ag (KED) | 0.020 ppb             |                   |
| 114Cd (KED) | 0.070 ppb             |                   |
| 115In (KED) | 52.660 %              |                   |
| 133Cs (KED) | 0.085 ppb             |                   |
| 138Ba (KED) | 5.362 ppb             |                   |
| 139La (KED) | 0.554 ppb             |                   |
| 140Ce (KED) | 1.142 ppb             |                   |
| 141Pr (KED) | 0.136 ppb             |                   |
| 142Nd (KED) | 0.730 ppb             |                   |
| 152Sm (KED) | 0.080 ppb             |                   |
| 153Eu (KED) | 0.016 ppb             |                   |
| 158Gd (KED) | 0.067 ppb             |                   |
| 159Tb (KED) | 49.161 %              |                   |
| 164Dy (KED) | 0.043 ppb             |                   |
| 166Er (KED) | 0.019 ppb             |                   |
| 169Tm (KED) | 0.003 ppb             |                   |
| 174Yb (KED) | 0.016 ppb             |                   |
| 175Lu (KED) | -0.106 ppb            |                   |
| 205Tl (KED) | 0.009 ppb             |                   |
| 208Pb (KED) | 0.923 ppb             |                   |
| 209Bi (KED) | 50.827 %              |                   |
| 232Th (KED) | 0.135 ppb             |                   |
| 238U (KED)  | 0.027 ppb             |                   |

| Category   | Concentration average | Intensity average | Intensity RSD |
|------------|-----------------------|-------------------|---------------|
| 6Li (KED)  | 54.750 %              | 1,677 cps         |               |
| 9Be (KED)  | 0.000 ppb             | 0 cps             |               |
| 11B (KED)  | 0.153 ppb             | 307 cps           |               |
| 24Mg (KED) | 243.508 ppb           | 77,470 cps        |               |
| 27Al (KED) | 449.027 ppb           | 34,959 cps        |               |

| Category    | Concentration average | Intensity average | Intensity RSD |
|-------------|-----------------------|-------------------|---------------|
| 45Sc (KED)  | 53.793 %              | 28,025 cps        |               |
| 51V (KED)   | 0.845 ppb             | 4,197 cps         |               |
| 52Cr (KED)  | 1.920 ppb             | 14,942 cps        |               |
| 55Mn (KED)  | 13.836 ppb            | 53,822 cps        |               |
| 56Fe (KED)  | 440.705 ppb           | 3,118,508 cps     |               |
| 58Ni (KED)  | 2.958 ppb             | 27,073 cps        |               |
| 59Co (KED)  | 0.208 ppb             | 3,170 cps         |               |
| 63Cu (KED)  | 5.905 ppb             | 64,895 cps        |               |
| 64Zn (KED)  | 101.915 ppb           | 242,365 cps       |               |
| 69Ga (KED)  | 1.500 ppb             | 5,501 cps         |               |
| 75As (KED)  | 0.352 ppb             | 267 cps           |               |
| 80Se (KED)  | 2.759 ppb             | 1,230 cps         |               |
| 85Rb (KED)  | 1.341 ppb             | 4,578 cps         |               |
| 88Sr (KED)  | 3.339 ppb             | 16,130 cps        |               |
| 89Y (KED)   | 52.828 %              | 254,125 cps       |               |
| 107Ag (KED) | 0.020 ppb             | 633 cps           |               |
| 114Cd (KED) | 0.070 ppb             | 673 cps           |               |
| 115In (KED) | 52.660 %              | 448,670 cps       |               |
| 133Cs (KED) | 0.085 ppb             | 1,373 cps         |               |
| 138Ba (KED) | 5.362 ppb             | 114,164 cps       |               |
| 139La (KED) | 0.554 ppb             | 25,242 cps        |               |
| 140Ce (KED) | 1.142 ppb             | 69,691 cps        |               |
| 141Pr (KED) | 0.136 ppb             | 8,663 cps         |               |
| 142Nd (KED) | 0.730 ppb             | 18,607 cps        |               |
| 152Sm (KED) | 0.080 ppb             | 1,867 cps         |               |
| 153Eu (KED) | 0.016 ppb             | 757 cps           |               |
| 158Gd (KED) | 0.067 ppb             | 2,100 cps         |               |
| 159Tb (KED) | 49.161 %              | 2,329,575 cps     |               |
| 164Dy (KED) | 0.043 ppb             | 1,543 cps         |               |
| 166Er (KED) | 0.019 ppb             | 1,027 cps         |               |
| 169Tm (KED) | 0.003 ppb             | 383 cps           |               |
| 174Yb (KED) | 0.016 ppb             | 817 cps           |               |
| 175Lu (KED) | -0.106 ppb            | 8,770 cps         |               |
| 205Tl (KED) | 0.009 ppb             | 973 cps           |               |
| 208Pb (KED) | 0.923 ppb             | 67,848 cps        |               |
| 209Bi (KED) | 50.827 %              | 1,810,319 cps     |               |
| 232Th (KED) | 0.135 ppb             | 19,161 cps        |               |
| 238U (KED)  | 0.027 ppb             | 4,497 cps         |               |

## Sample Summary

Instrument ID: iCAP Q

Analysis index: 49

Analysis name: 802008jian

Analysis started at: 10/28/2021 5:04:48 PM

User name: WINDOWS-UPCI4ER\Administrator

| Category    | Concentration average | Concentration RSD |
|-------------|-----------------------|-------------------|
| 6Li (KED)   | 56.274 %              |                   |
| 9Be (KED)   | 0.000 ppb             |                   |
| 11B (KED)   | -0.801 ppb            |                   |
| 24Mg (KED)  | 293.457 ppb           |                   |
| 27Al (KED)  | 560.247 ppb           |                   |
| 45Sc (KED)  | 56.532 %              |                   |
| 51V (KED)   | 0.947 ppb             |                   |
| 52Cr (KED)  | 2.000 ppb             |                   |
| 55Mn (KED)  | 16.619 ppb            |                   |
| 56Fe (KED)  | 490.187 ppb           |                   |
| 58Ni (KED)  | 2.851 ppb             |                   |
| 59Co (KED)  | 0.259 ppb             |                   |
| 63Cu (KED)  | 5.333 ppb             |                   |
| 64Zn (KED)  | 112.833 ppb           |                   |
| 69Ga (KED)  | 1.827 ppb             |                   |
| 75As (KED)  | 0.690 ppb             |                   |
| 80Se (KED)  | 3.759 ppb             |                   |
| 85Rb (KED)  | 1.376 ppb             |                   |
| 88Sr (KED)  | 4.502 ppb             |                   |
| 89Y (KED)   | 52.793 %              |                   |
| 107Ag (KED) | 0.087 ppb             |                   |
| 114Cd (KED) | 0.084 ppb             |                   |
| 115In (KED) | 52.726 %              |                   |
| 133Cs (KED) | 0.097 ppb             |                   |
| 138Ba (KED) | 6.593 ppb             |                   |
| 139La (KED) | 0.531 ppb             |                   |
| 140Ce (KED) | 1.067 ppb             |                   |
| 141Pr (KED) | 0.123 ppb             |                   |
| 142Nd (KED) | 0.676 ppb             |                   |
| 152Sm (KED) | 0.092 ppb             |                   |
| 153Eu (KED) | 0.019 ppb             |                   |
| 158Gd (KED) | 0.074 ppb             |                   |
| 159Tb (KED) | 48.597 %              |                   |
| 164Dy (KED) | 0.051 ppb             |                   |
| 166Er (KED) | 0.025 ppb             |                   |
| 169Tm (KED) | 0.003 ppb             |                   |
| 174Yb (KED) | 0.021 ppb             |                   |
| 175Lu (KED) | -0.103 ppb            |                   |
| 205Tl (KED) | 0.013 ppb             |                   |
| 208Pb (KED) | 1.158 ppb             |                   |
| 209Bi (KED) | 51.800 %              |                   |
| 232Th (KED) | 0.143 ppb             |                   |
| 238U (KED)  | 0.033 ppb             |                   |

| Category   | Concentration average | Intensity average | Intensity RSD |
|------------|-----------------------|-------------------|---------------|
| 6Li (KED)  | 56.274 %              | 1,723 cps         |               |
| 9Be (KED)  | 0.000 ppb             | 0 cps             |               |
| 11B (KED)  | -0.801 ppb            | 273 cps           |               |
| 24Mg (KED) | 293.457 ppb           | 95,944 cps        |               |
| 27Al (KED) | 560.247 ppb           | 45,827 cps        |               |

| Category    | Concentration average | Intensity average | Intensity RSD |
|-------------|-----------------------|-------------------|---------------|
| 45Sc (KED)  | 56.532 %              | 29,451 cps        |               |
| 51V (KED)   | 0.947 ppb             | 4,941 cps         |               |
| 52Cr (KED)  | 2.000 ppb             | 16,351 cps        |               |
| 55Mn (KED)  | 16.619 ppb            | 67,931 cps        |               |
| 56Fe (KED)  | 490.187 ppb           | 3,645,093 cps     |               |
| 58Ni (KED)  | 2.851 ppb             | 27,420 cps        |               |
| 59Co (KED)  | 0.259 ppb             | 4,151 cps         |               |
| 63Cu (KED)  | 5.333 ppb             | 58,674 cps        |               |
| 64Zn (KED)  | 112.833 ppb           | 268,039 cps       |               |
| 69Ga (KED)  | 1.827 ppb             | 6,692 cps         |               |
| 75As (KED)  | 0.690 ppb             | 517 cps           |               |
| 80Se (KED)  | 3.759 ppb             | 1,450 cps         |               |
| 85Rb (KED)  | 1.376 ppb             | 4,691 cps         |               |
| 88Sr (KED)  | 4.502 ppb             | 21,716 cps        |               |
| 89Y (KED)   | 52.793 %              | 253,956 cps       |               |
| 107Ag (KED) | 0.087 ppb             | 2,650 cps         |               |
| 114Cd (KED) | 0.084 ppb             | 803 cps           |               |
| 115In (KED) | 52.726 %              | 449,235 cps       |               |
| 133Cs (KED) | 0.097 ppb             | 1,580 cps         |               |
| 138Ba (KED) | 6.593 ppb             | 138,689 cps       |               |
| 139La (KED) | 0.531 ppb             | 23,916 cps        |               |
| 140Ce (KED) | 1.067 ppb             | 64,369 cps        |               |
| 141Pr (KED) | 0.123 ppb             | 7,732 cps         |               |
| 142Nd (KED) | 0.676 ppb             | 17,032 cps        |               |
| 152Sm (KED) | 0.092 ppb             | 2,100 cps         |               |
| 153Eu (KED) | 0.019 ppb             | 877 cps           |               |
| 158Gd (KED) | 0.074 ppb             | 2,310 cps         |               |
| 159Tb (KED) | 48.597 %              | 2,302,827 cps     |               |
| 164Dy (KED) | 0.051 ppb             | 1,790 cps         |               |
| 166Er (KED) | 0.025 ppb             | 1,257 cps         |               |
| 169Tm (KED) | 0.003 ppb             | 473 cps           |               |
| 174Yb (KED) | 0.021 ppb             | 1,040 cps         |               |
| 175Lu (KED) | -0.103 ppb            | 8,910 cps         |               |
| 205Tl (KED) | 0.013 ppb             | 1,370 cps         |               |
| 208Pb (KED) | 1.158 ppb             | 86,245 cps        |               |
| 209Bi (KED) | 51.800 %              | 1,844,968 cps     |               |
| 232Th (KED) | 0.143 ppb             | 20,580 cps        |               |
| 238U (KED)  | 0.033 ppb             | 5,651 cps         |               |

## Sample Summary

Instrument ID: iCAP Q

Analysis index: 50

Analysis name: 80214jian

Analysis started at: 10/28/2021 5:06:43 PM

User name: WINDOWS-UPCI4ER\Administrator

| Category    | Concentration average | Concentration RSD |
|-------------|-----------------------|-------------------|
| 6Li (KED)   | 53.770 %              |                   |
| 9Be (KED)   | 0.089 ppb             |                   |
| 11B (KED)   | -0.988 ppb            |                   |
| 24Mg (KED)  | 104.114 ppb           |                   |
| 27Al (KED)  | 181.436 ppb           |                   |
| 45Sc (KED)  | 53.402 %              |                   |
| 51V (KED)   | 0.262 ppb             |                   |
| 52Cr (KED)  | 1.138 ppb             |                   |
| 55Mn (KED)  | 3.727 ppb             |                   |
| 56Fe (KED)  | 156.950 ppb           |                   |
| 58Ni (KED)  | 1.232 ppb             |                   |
| 59Co (KED)  | 0.070 ppb             |                   |
| 63Cu (KED)  | 4.785 ppb             |                   |
| 64Zn (KED)  | 111.647 ppb           |                   |
| 69Ga (KED)  | 0.738 ppb             |                   |
| 75As (KED)  | 0.198 ppb             |                   |
| 80Se (KED)  | 3.858 ppb             |                   |
| 85Rb (KED)  | 1.083 ppb             |                   |
| 88Sr (KED)  | 1.618 ppb             |                   |
| 89Y (KED)   | 52.005 %              |                   |
| 107Ag (KED) | 0.030 ppb             |                   |
| 114Cd (KED) | 0.043 ppb             |                   |
| 115In (KED) | 52.378 %              |                   |
| 133Cs (KED) | 0.027 ppb             |                   |
| 138Ba (KED) | 2.637 ppb             |                   |
| 139La (KED) | 0.127 ppb             |                   |
| 140Ce (KED) | 0.258 ppb             |                   |
| 141Pr (KED) | 0.031 ppb             |                   |
| 142Nd (KED) | 0.165 ppb             |                   |
| 152Sm (KED) | 0.021 ppb             |                   |
| 153Eu (KED) | 0.003 ppb             |                   |
| 158Gd (KED) | 0.019 ppb             |                   |
| 159Tb (KED) | 49.486 %              |                   |
| 164Dy (KED) | 0.014 ppb             |                   |
| 166Er (KED) | 0.004 ppb             |                   |
| 169Tm (KED) | 0.001 ppb             |                   |
| 174Yb (KED) | 0.006 ppb             |                   |
| 175Lu (KED) | -0.102 ppb            |                   |
| 205Tl (KED) | 0.006 ppb             |                   |
| 208Pb (KED) | 0.565 ppb             |                   |
| 209Bi (KED) | 50.611 %              |                   |
| 232Th (KED) | 0.034 ppb             |                   |
| 238U (KED)  | 0.011 ppb             |                   |

| Category   | Concentration average | Intensity average | Intensity RSD |
|------------|-----------------------|-------------------|---------------|
| 6Li (KED)  | 53.770 %              | 1,647 cps         |               |
| 9Be (KED)  | 0.089 ppb             | 7 cps             |               |
| 11B (KED)  | -0.988 ppb            | 253 cps           |               |
| 24Mg (KED) | 104.114 ppb           | 32,572 cps        |               |
| 27Al (KED) | 181.436 ppb           | 14,048 cps        |               |

| Category    | Concentration average | Intensity average | Intensity RSD |
|-------------|-----------------------|-------------------|---------------|
| 45Sc (KED)  | 53.402 %              | 27,821 cps        |               |
| 51V (KED)   | 0.262 ppb             | 1,293 cps         |               |
| 52Cr (KED)  | 1.138 ppb             | 8,796 cps         |               |
| 55Mn (KED)  | 3.727 ppb             | 14,412 cps        |               |
| 56Fe (KED)  | 156.950 ppb           | 1,103,227 cps     |               |
| 58Ni (KED)  | 1.232 ppb             | 11,278 cps        |               |
| 59Co (KED)  | 0.070 ppb             | 1,070 cps         |               |
| 63Cu (KED)  | 4.785 ppb             | 51,968 cps        |               |
| 64Zn (KED)  | 111.647 ppb           | 261,274 cps       |               |
| 69Ga (KED)  | 0.738 ppb             | 2,674 cps         |               |
| 75As (KED)  | 0.198 ppb             | 150 cps           |               |
| 80Se (KED)  | 3.858 ppb             | 1,450 cps         |               |
| 85Rb (KED)  | 1.083 ppb             | 3,641 cps         |               |
| 88Sr (KED)  | 1.618 ppb             | 7,716 cps         |               |
| 89Y (KED)   | 52.005 %              | 250,167 cps       |               |
| 107Ag (KED) | 0.030 ppb             | 910 cps           |               |
| 114Cd (KED) | 0.043 ppb             | 417 cps           |               |
| 115In (KED) | 52.378 %              | 446,270 cps       |               |
| 133Cs (KED) | 0.027 ppb             | 437 cps           |               |
| 138Ba (KED) | 2.637 ppb             | 56,679 cps        |               |
| 139La (KED) | 0.127 ppb             | 5,838 cps         |               |
| 140Ce (KED) | 0.258 ppb             | 15,893 cps        |               |
| 141Pr (KED) | 0.031 ppb             | 1,997 cps         |               |
| 142Nd (KED) | 0.165 ppb             | 4,234 cps         |               |
| 152Sm (KED) | 0.021 ppb             | 500 cps           |               |
| 153Eu (KED) | 0.003 ppb             | 143 cps           |               |
| 158Gd (KED) | 0.019 ppb             | 613 cps           |               |
| 159Tb (KED) | 49.486 %              | 2,344,984 cps     |               |
| 164Dy (KED) | 0.014 ppb             | 497 cps           |               |
| 166Er (KED) | 0.004 ppb             | 400 cps           |               |
| 169Tm (KED) | 0.001 ppb             | 140 cps           |               |
| 174Yb (KED) | 0.006 ppb             | 287 cps           |               |
| 175Lu (KED) | -0.102 ppb            | 9,110 cps         |               |
| 205Tl (KED) | 0.006 ppb             | 620 cps           |               |
| 208Pb (KED) | 0.565 ppb             | 42,188 cps        |               |
| 209Bi (KED) | 50.611 %              | 1,802,619 cps     |               |
| 232Th (KED) | 0.034 ppb             | 4,834 cps         |               |
| 238U (KED)  | 0.011 ppb             | 1,887 cps         |               |
