# Supplementary material for: Geographic and breed-specific traceability of cashmere via mineral element profiling in Inner Mongolia (Ordos, Chifeng, and Alxa League)
Source: Royal Society of Chemistry journal article supplement (doi:10.1039/d5ra08122j), 2026-01-01
Supplement: d5ra08122j1.zip [file 20211103-e tuo ke qi(1-20) + e tuo ke qi (1-11)+wen niu te qi (12-20).pdf › ԭʼ޿/20211103-e tuo ke qi(1-20) + e tuo ke qi (1-11)+wen niu te qi (12-20).pdf]

## Instrument Summary:

Instrument ID: iCAP Q  
Serial Number: Undefined

## Labbook Summary:

Path and filename: \_Application Data\Workspace\LabBooks\wlw\20211103-2.imexp  
Labbook created by: Administrator  
Based on template:  
Hardware configuration: iCAPQ1  
Labbook type: eQuant  
Qtegra version (last saved): 2.7.2425.154  
Labbook started: 11/3/2021 2:30:12 PM  
Labbook finished: 11/3/2021 4:38:10 PM

## Method Summary:

| Isotope     | Mode | Dwell time (s) | # of Channels | Spacing | Resolution | IS          |
|-------------|------|----------------|---------------|---------|------------|-------------|
| 6Li (KED)   | KED  | 0.03           | 3             | 0.1     | Normal     |             |
| 9Be (KED)   | KED  | 0.03           | 3             | 0.1     | Normal     | 6Li (KED)   |
| 11B (KED)   | KED  | 0.03           | 3             | 0.1     | Normal     | 6Li (KED)   |
| 24Mg (KED)  | KED  | 0.03           | 3             | 0.1     | Normal     | 6Li (KED)   |
| 27Al (KED)  | KED  | 0.03           | 3             | 0.1     | Normal     | 45Sc (KED)  |
| 45Sc (KED)  | KED  | 0.03           | 3             | 0.1     | Normal     |             |
| 51V (KED)   | KED  | 0.03           | 3             | 0.1     | Normal     | 45Sc (KED)  |
| 52Cr (KED)  | KED  | 0.03           | 3             | 0.1     | Normal     | 45Sc (KED)  |
| 55Mn (KED)  | KED  | 0.03           | 3             | 0.1     | Normal     | 45Sc (KED)  |
| 56Fe (KED)  | KED  | 0.03           | 3             | 0.1     | Normal     | 45Sc (KED)  |
| 58Ni (KED)  | KED  | 0.03           | 3             | 0.1     | Normal     | 45Sc (KED)  |
| 59Co (KED)  | KED  | 0.03           | 3             | 0.1     | Normal     | 45Sc (KED)  |
| 63Cu (KED)  | KED  | 0.03           | 3             | 0.1     | Normal     | 89Y (KED)   |
| 64Zn (KED)  | KED  | 0.03           | 3             | 0.1     | Normal     | 89Y (KED)   |
| 69Ga (KED)  | KED  | 0.03           | 3             | 0.1     | Normal     | 89Y (KED)   |
| 75As (KED)  | KED  | 0.03           | 3             | 0.1     | Normal     | 89Y (KED)   |
| 80Se (KED)  | KED  | 0.03           | 3             | 0.1     | Normal     | 89Y (KED)   |
| 85Rb (KED)  | KED  | 0.03           | 3             | 0.1     | Normal     | 89Y (KED)   |
| 88Sr (KED)  | KED  | 0.03           | 3             | 0.1     | Normal     | 89Y (KED)   |
| 89Y (KED)   | KED  | 0.03           | 3             | 0.1     | Normal     |             |
| 107Ag (KED) | KED  | 0.03           | 3             | 0.1     | Normal     | 115In (KED) |
| 114Cd (KED) | KED  | 0.03           | 3             | 0.1     | Normal     | 115In (KED) |
| 115In (KED) | KED  | 0.03           | 3             | 0.1     | Normal     |             |
| 133Cs (KED) | KED  | 0.03           | 3             | 0.1     | Normal     | 115In (KED) |
| 138Ba (KED) | KED  | 0.03           | 3             | 0.1     | Normal     | 159Tb (KED) |
| 139La (KED) | KED  | 0.03           | 3             | 0.1     | Normal     | 159Tb (KED) |
| 140Ce (KED) | KED  | 0.03           | 3             | 0.1     | Normal     | 159Tb (KED) |
| 141Pr (KED) | KED  | 0.03           | 3             | 0.1     | Normal     | 159Tb (KED) |
| 142Nd (KED) | KED  | 0.03           | 3             | 0.1     | Normal     | 159Tb (KED) |
| 152Sm (KED) | KED  | 0.03           | 3             | 0.1     | Normal     | 159Tb (KED) |
| 153Eu (KED) | KED  | 0.03           | 3             | 0.1     | Normal     | 159Tb (KED) |
| 158Gd (KED) | KED  | 0.03           | 3             | 0.1     | Normal     | 159Tb (KED) |
| 159Tb (KED) | KED  | 0.03           | 3             | 0.1     | Normal     |             |
| 164Dy (KED) | KED  | 0.03           | 3             | 0.1     | Normal     | 159Tb (KED) |
| 166Er (KED) | KED  | 0.03           | 3             | 0.1     | Normal     | 159Tb (KED) |
| 169Tm (KED) | KED  | 0.03           | 3             | 0.1     | Normal     | 159Tb (KED) |
| 174Yb (KED) | KED  | 0.03           | 3             | 0.1     | Normal     | 159Tb (KED) |
| 175Lu (KED) | KED  | 0.03           | 3             | 0.1     | Normal     | 159Tb (KED) |
| 205Tl (KED) | KED  | 0.03           | 3             | 0.1     | Normal     | 209Bi (KED) |
| 208Pb (KED) | KED  | 0.03           | 3             | 0.1     | Normal     | 209Bi (KED) |
| 209Bi (KED) | KED  | 0.03           | 3             | 0.1     | Normal     |             |
| 232Th (KED) | KED  | 0.03           | 3             | 0.1     | Normal     | 209Bi (KED) |
| 238U (KED)  | KED  | 0.03           | 3             | 0.1     | Normal     | 209Bi (KED) |

| Isotope     | Mode | Dwell time (s) | # of Channels | Spacing | Resolution |
|-------------|------|----------------|---------------|---------|------------|
| 6Li (KED)   | KED  | 0.03           | 3             | 0.1     | Normal     |
| 45Sc (KED)  | KED  | 0.03           | 3             | 0.1     | Normal     |
| 89Y (KED)   | KED  | 0.03           | 3             | 0.1     | Normal     |
| 115In (KED) | KED  | 0.03           | 3             | 0.1     | Normal     |
| 159Tb (KED) | KED  | 0.03           | 3             | 0.1     | Normal     |
| 209Bi (KED) | KED  | 0.03           | 3             | 0.1     | Normal     |

| No. of sweeps | Time per sweep[s] | Time per main run[s] |
|---------------|-------------------|----------------------|
| 10            | 3.87              | 38.7                 |

## Calibration Curves:

9Be (KED)

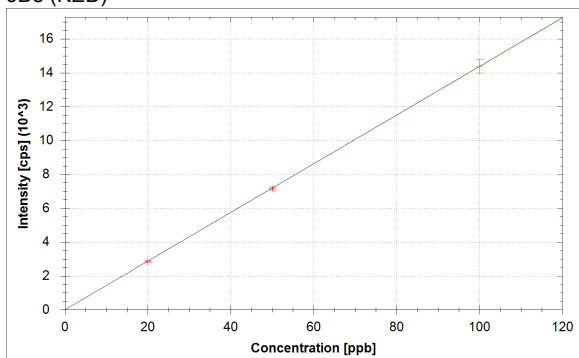

$$f(x) = 143.7247 \cdot x$$

$$R^2 = 1.0000$$

$$\text{BEC} = 0.000 \text{ ppb}$$

$$\text{LoD} = 0.0391 \text{ ppb}$$

11B (KED)

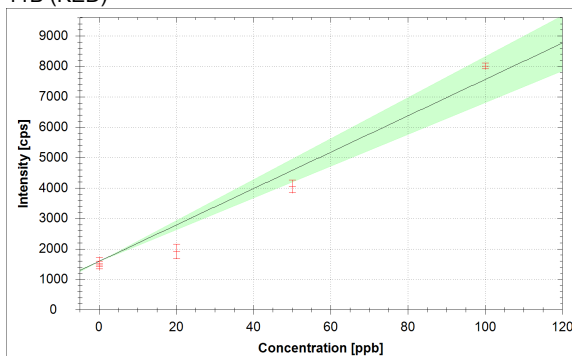

$$f(x) = 59.7792 \cdot x + 1591.0718$$

$$R^2 = 0.9595$$

$$\text{BEC} = 26.616 \text{ ppb}$$

$$\text{LoD} = 4.2095 \text{ ppb}$$

24Mg (KED)

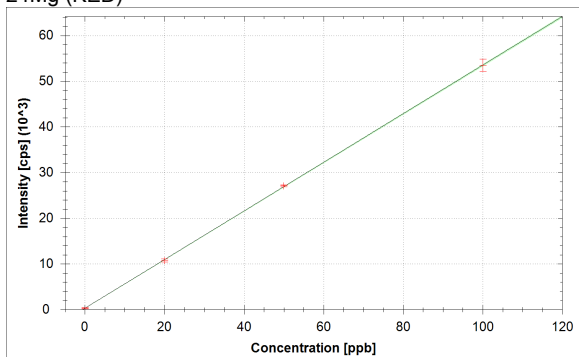

$$f(x) = 532.5315 \cdot x + 284.9001$$

$$R^2 = 1.0000$$

$$\text{BEC} = 0.535 \text{ ppb}$$

$$\text{LoD} = 0.1528 \text{ ppb}$$

27Al (KED)

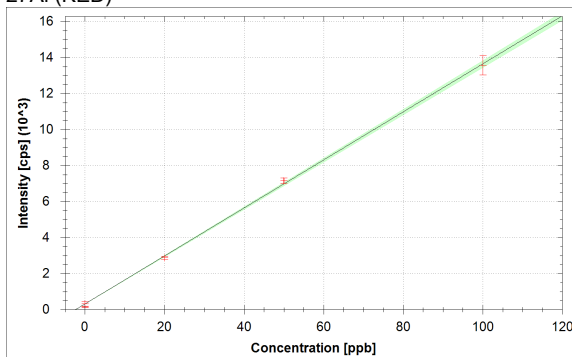

$$f(x) = 133.3176 \cdot x + 310.6546$$

$$R^2 = 0.9994$$

$$\text{BEC} = 2.330 \text{ ppb}$$

$$\text{LoD} = 0.2543 \text{ ppb}$$

51V (KED)

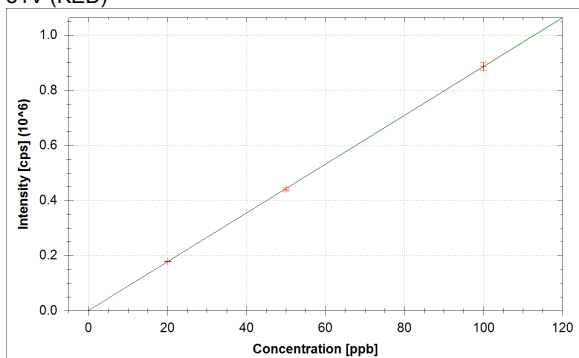

$$f(x) = 8856.2635 \cdot x + 10.7236$$

$$R^2 = 1.0000$$

$$\text{BEC} = 0.001 \text{ ppb}$$

$$\text{LoD} = 0.0007 \text{ ppb}$$

52Cr (KED)

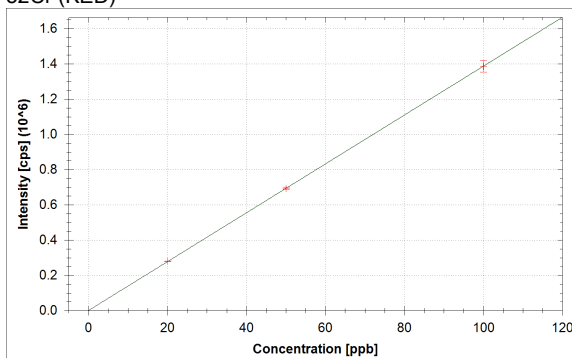

$$f(x) = 13867.8762 \cdot x + 113.0624$$

$$R^2 = 1.0000$$

$$\text{BEC} = 0.008 \text{ ppb}$$

$$\text{LoD} = 0.0006 \text{ ppb}$$

55Mn (KED)

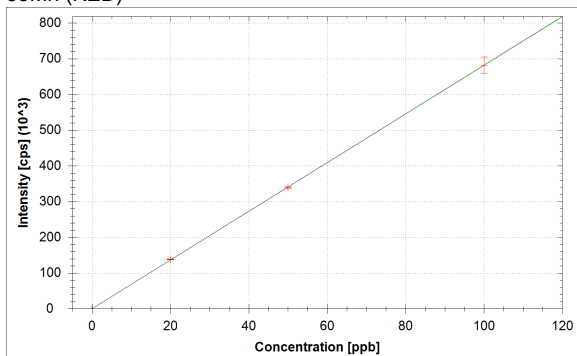

$$f(x) = 6814.7402 \cdot x + 91.6290$$

$$R^2 = 1.0000$$

$$\text{BEC} = 0.013 \text{ ppb}$$

$$\text{LoD} = 0.0059 \text{ ppb}$$

56Fe (KED)

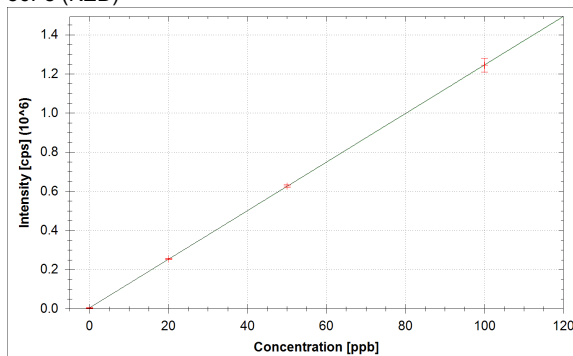

$$f(x) = 12408.3264 \cdot x + 4616.4851$$

$$R^2 = 1.0000$$

$$\text{BEC} = 0.372 \text{ ppb}$$

$$\text{LoD} = 0.0614 \text{ ppb}$$

58Ni (KED)

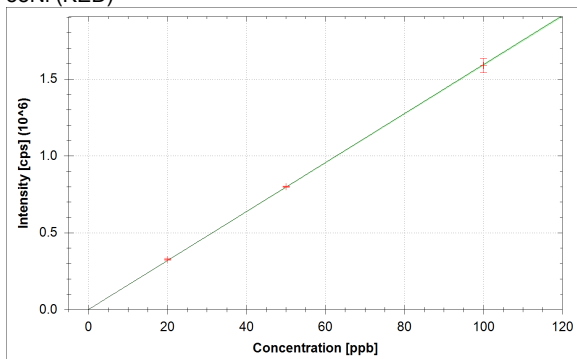

$$f(x) = 15918.3026 \cdot x + 309.4023$$

$$R^2 = 0.9999$$

$$\text{BEC} = 0.019 \text{ ppb}$$

$$\text{LoD} = 0.0033 \text{ ppb}$$

59Co (KED)

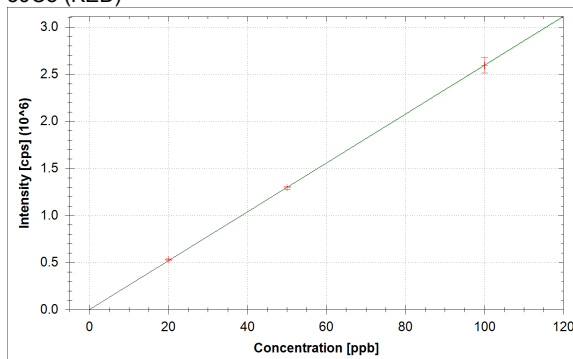

$$f(x) = 25938.1319 \cdot x + 41.6580$$

$$R^2 = 1.0000$$

$$\text{BEC} = 0.002 \text{ ppb}$$

$$\text{LoD} = 0.0019 \text{ ppb}$$

63Cu (KED)

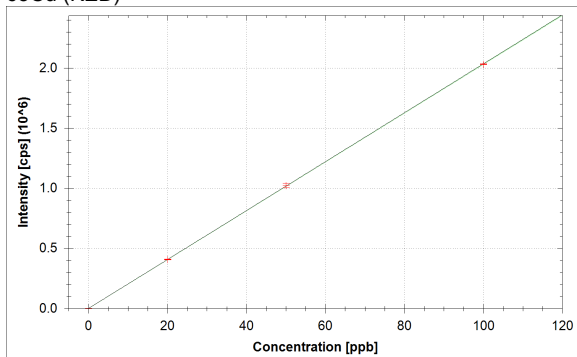

$$f(x) = 20331.9695 \cdot x + 993.2868$$

$$R^2 = 1.0000$$

$$\text{BEC} = 0.049 \text{ ppb}$$

$$\text{LoD} = 0.0018 \text{ ppb}$$

64Zn (KED)

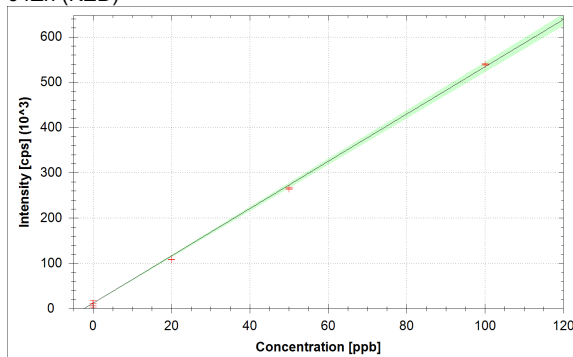

$$f(x) = 5220.5502 \cdot x + 11852.0426$$

$$R^2 = 0.9988$$

$$\text{BEC} = 2.270 \text{ ppb}$$

$$\text{LoD} = 0.0469 \text{ ppb}$$

69Ga (KED)

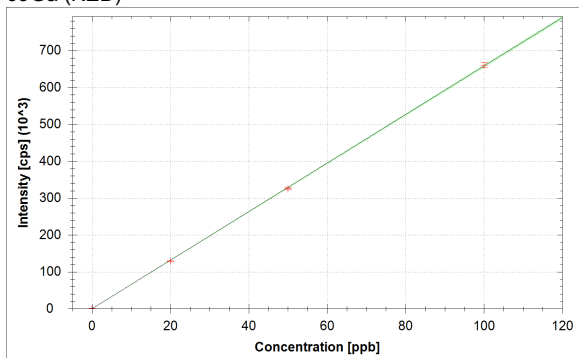

$$f(x) = 6579.0606 \cdot x + 172.8140$$

$$R^2 = 0.9999$$

$$\text{BEC} = 0.026 \text{ ppb}$$

$$\text{LoD} = 0.0091 \text{ ppb}$$

75As (KED)

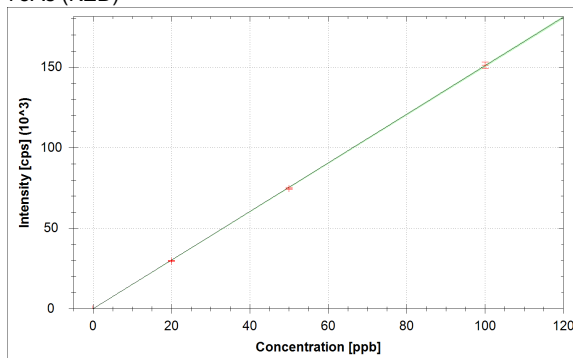

$$f(x) = 1507.8699 \cdot x + 10.9265$$

$$R^2 = 0.9999$$

$$\text{BEC} = 0.007 \text{ ppb}$$

$$\text{LoD} = 0.0153 \text{ ppb}$$

80Se (KED)

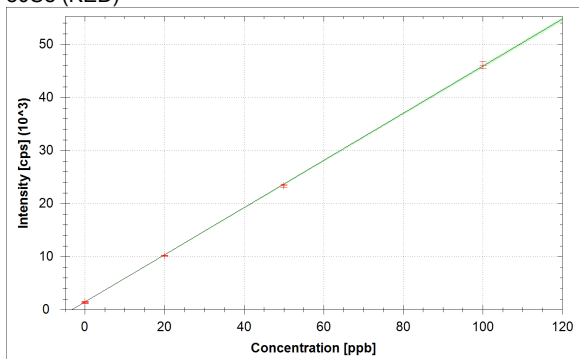

$$f(x) = 444.2880 \cdot x + 1429.7856$$

$$R^2 = 0.9999$$

$$\text{BEC} = 3.218 \text{ ppb}$$

$$\text{LoD} = 0.6769 \text{ ppb}$$

85Rb (KED)

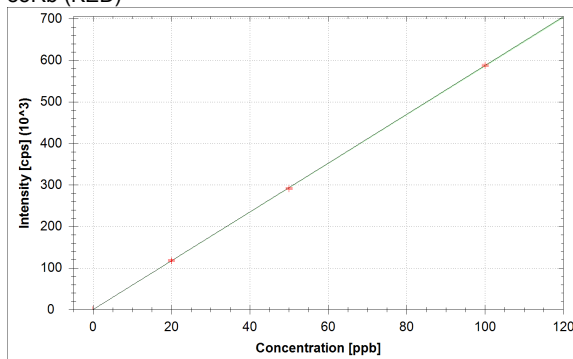

$$f(x) = 5870.9258 \cdot x + 20.6580$$

$$R^2 = 1.0000$$

$$\text{BEC} = 0.004 \text{ ppb}$$

$$\text{LoD} = 0.0045 \text{ ppb}$$

88Sr (KED)

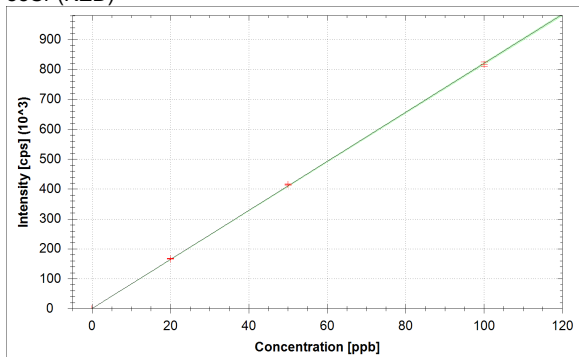

$$f(x) = 8199.5652 \cdot x + 210.8632$$

$$R^2 = 0.9999$$

$$\text{BEC} = 0.026 \text{ ppb}$$

$$\text{LoD} = 0.0030 \text{ ppb}$$

107Ag (KED)

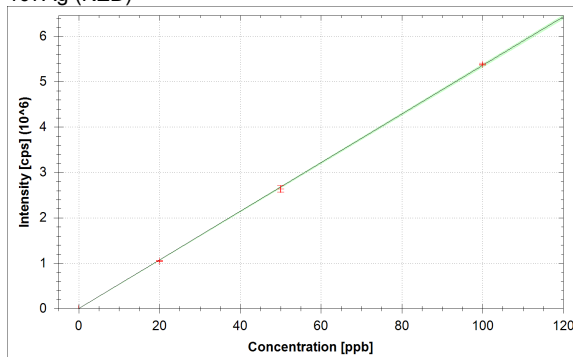

$$f(x) = 53573.3157 \cdot x + 40.7509$$

$$R^2 = 0.9999$$

$$\text{BEC} = 0.001 \text{ ppb}$$

$$\text{LoD} = 0.0007 \text{ ppb}$$

**<sup>114</sup>Cd (KED)**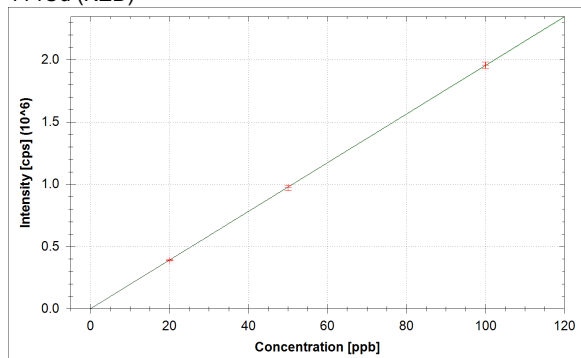

$$f(x) = 19540.0536 \cdot x + 45.8127$$

$$R^2 = 1.0000$$

$$\text{BEC} = 0.002 \text{ ppb}$$

$$\text{LoD} = 0.0024 \text{ ppb}$$

**<sup>133</sup>Cs (KED)**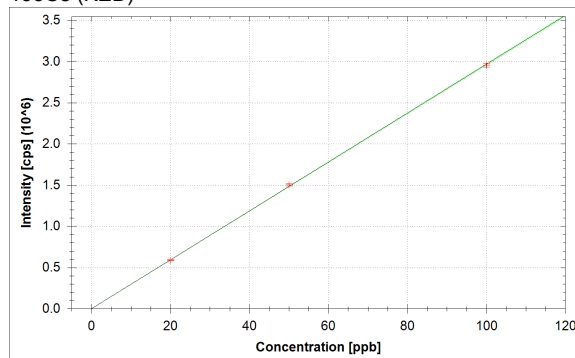

$$f(x) = 29660.8240 \cdot x + 34.9506$$

$$R^2 = 0.9999$$

$$\text{BEC} = 0.001 \text{ ppb}$$

$$\text{LoD} = 0.0004 \text{ ppb}$$

**<sup>138</sup>Ba (KED)**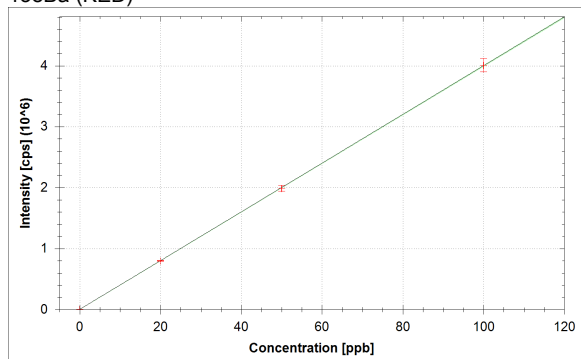

$$f(x) = 39966.0082 \cdot x + 3574.9112$$

$$R^2 = 1.0000$$

$$\text{BEC} = 0.089 \text{ ppb}$$

$$\text{LoD} = 0.0015 \text{ ppb}$$

**<sup>139</sup>La (KED)**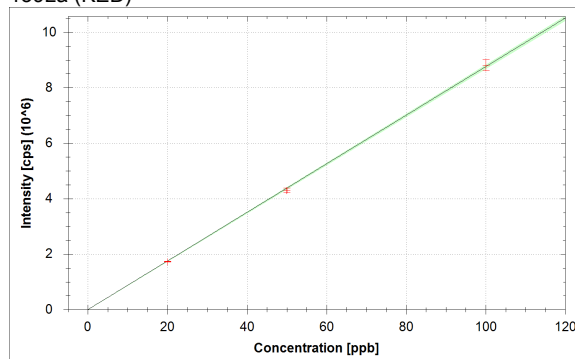

$$f(x) = 87594.7483 \cdot x + 86.3623$$

$$R^2 = 0.9998$$

$$\text{BEC} = 0.001 \text{ ppb}$$

$$\text{LoD} = 0.0006 \text{ ppb}$$

**<sup>140</sup>Ce (KED)**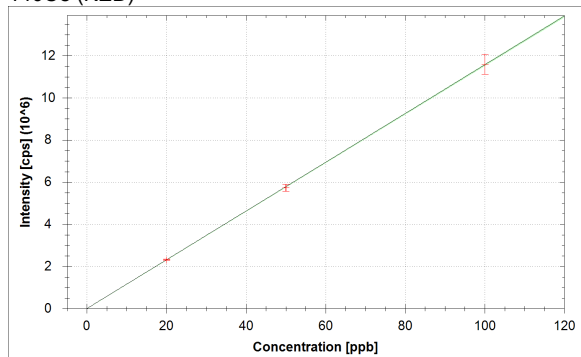

$$f(x) = 115653.9709 \cdot x + 1225.4730$$

$$R^2 = 1.0000$$

$$\text{BEC} = 0.011 \text{ ppb}$$

$$\text{LoD} = 0.0004 \text{ ppb}$$

**<sup>141</sup>Pr (KED)**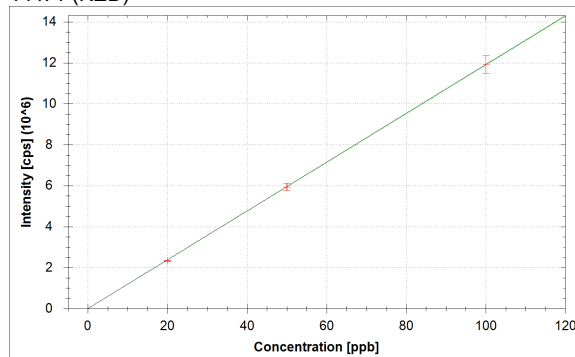

$$f(x) = 119082.4941 \cdot x + 45.5494$$

$$R^2 = 1.0000$$

$$\text{BEC} = 0.000 \text{ ppb}$$

$$\text{LoD} = 0.0003 \text{ ppb}$$

**<sup>142</sup>Nd (KED)**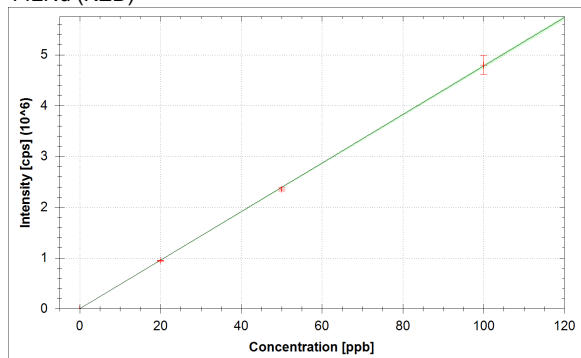

$$f(x) = 47769.2738 \cdot x + 258.4060$$

$$R^2 = 0.9999$$

$$\text{BEC} = 0.005 \text{ ppb}$$

$$\text{LoD} = 0.0022 \text{ ppb}$$

**<sup>152</sup>Sm (KED)**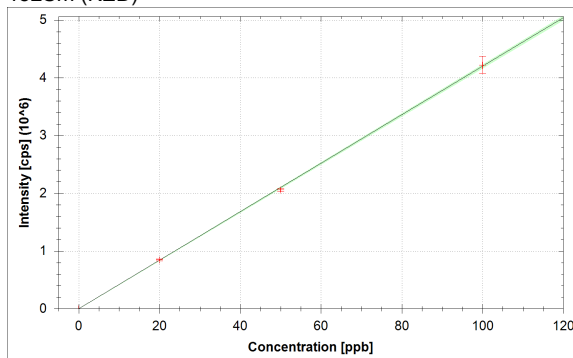

$$f(x) = 42001.0290 \cdot x + 8.4990$$

$$R^2 = 0.9998$$

$$\text{BEC} = 0.000 \text{ ppb}$$

$$\text{LoD} = 0.0003 \text{ ppb}$$

**<sup>153</sup>Eu (KED)**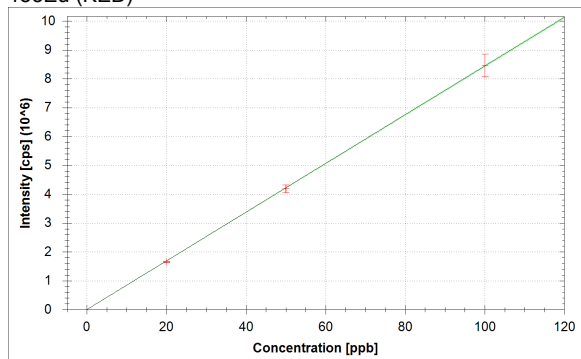

$$f(x) = 84392.5193 \cdot x + 10.6120$$

$$R^2 = 0.9999$$

$$\text{BEC} = 0.000 \text{ ppb}$$

$$\text{LoD} = 0.0003 \text{ ppb}$$

**<sup>158</sup>Gd (KED)**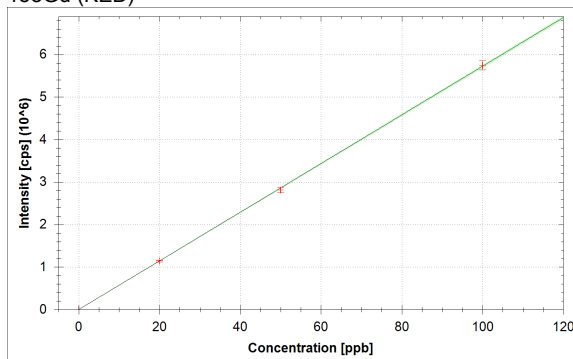

$$f(x) = 57238.4588 \cdot x + 10.8085$$

$$R^2 = 0.9999$$

$$\text{BEC} = 0.000 \text{ ppb}$$

$$\text{LoD} = 0.0001 \text{ ppb}$$

**<sup>164</sup>Dy (KED)**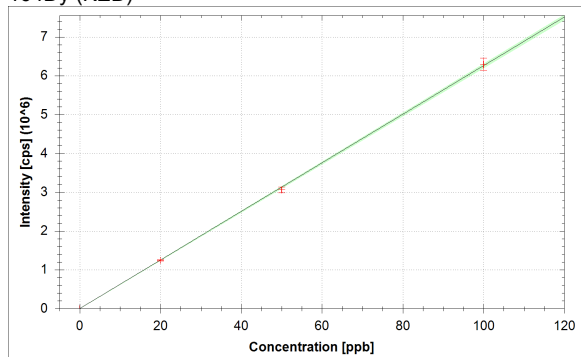

$$f(x) = 62572.8476 \cdot x + 29.9841$$

$$R^2 = 0.9998$$

$$\text{BEC} = 0.000 \text{ ppb}$$

$$\text{LoD} = 0.0003 \text{ ppb}$$

**<sup>166</sup>Er (KED)**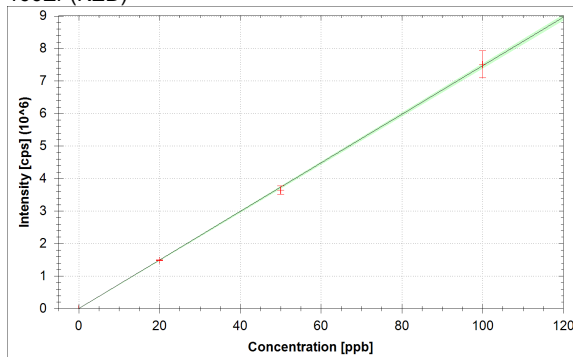

$$f(x) = 74658.6365 \cdot x + 356.3700$$

$$R^2 = 0.9997$$

$$\text{BEC} = 0.005 \text{ ppb}$$

$$\text{LoD} = 0.0022 \text{ ppb}$$

169Tm (KED)

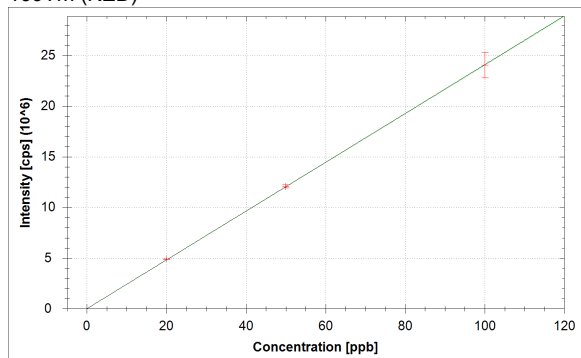

$$f(x) = 240863.0685 \cdot x + 8.4344$$

$$R^2 = 1.0000$$

$$\text{BEC} = 0.000 \text{ ppb}$$

$$\text{LoD} = 0.0001 \text{ ppb}$$

174Yb (KED)

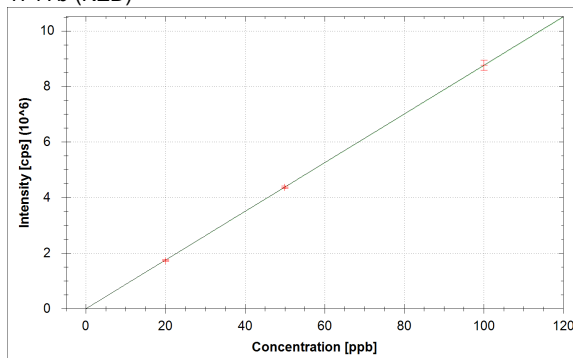

$$f(x) = 87571.8115 \cdot x + 27.5708$$

$$R^2 = 1.0000$$

$$\text{BEC} = 0.000 \text{ ppb}$$

$$\text{LoD} = 0.0001 \text{ ppb}$$

175Lu (KED)

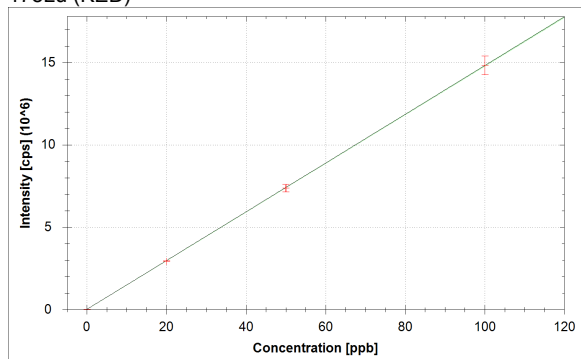

$$f(x) = 147921.5746 \cdot x + 15091.6802$$

$$R^2 = 1.0000$$

$$\text{BEC} = 0.102 \text{ ppb}$$

$$\text{LoD} = 0.0149 \text{ ppb}$$

205TI (KED)

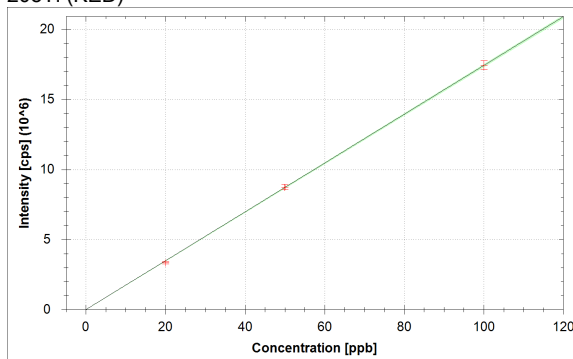

$$f(x) = 174306.4859 \cdot x + 45.7268$$

$$R^2 = 0.9999$$

$$\text{BEC} = 0.000 \text{ ppb}$$

$$\text{LoD} = 0.0001 \text{ ppb}$$

208Pb (KED)

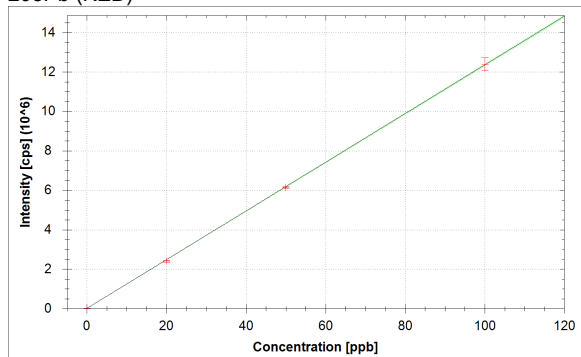

$$f(x) = 123462.1425 \cdot x + 9797.3352$$

$$R^2 = 0.9999$$

$$\text{BEC} = 0.079 \text{ ppb}$$

$$\text{LoD} = 0.0008 \text{ ppb}$$

232Th (KED)

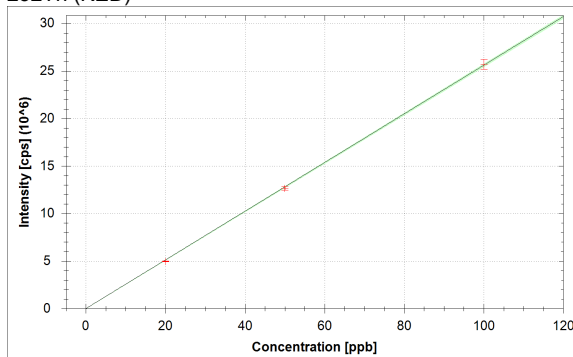

$$f(x) = 256054.8325 \cdot x + 270.2665$$

$$R^2 = 0.9999$$

$$\text{BEC} = 0.001 \text{ ppb}$$

$$\text{LoD} = 0.0004 \text{ ppb}$$

238U (KED)

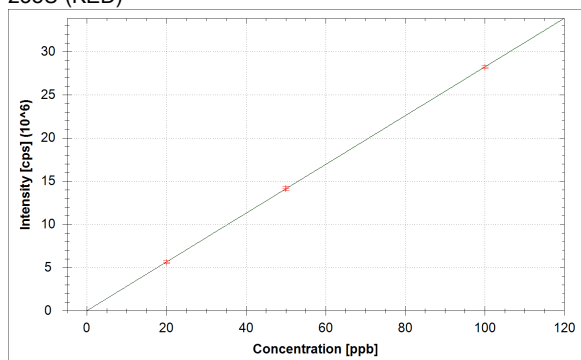

$$f(x) = 282256.7919 \cdot x + 183.2573$$

$$R^2 = 1.0000$$

$$\text{BEC} = 0.001 \text{ ppb}$$

$$\text{LoD} = 0.0005 \text{ ppb}$$

**Standards:**

Analysis Index: 3  
 Analysis Name: 0+20  
 Analysis Type: STD  
 Analysis Started at: 11/3/2021 2:36:38 PM  
 Standard (Stock): std0  
 Standard DF: 1

| Category    | Concentration average | Concentration RSD | Standard Concentration |
|-------------|-----------------------|-------------------|------------------------|
| 6Li (KED)   | 94.439 %              |                   |                        |
| 9Be (KED)   | 0.000 ppb             |                   | 0.000 ppb              |
| 11B (KED)   | 0.000 ppb             | 0.1 %             | 0.000 ppb              |
| 24Mg (KED)  | 0.000 ppb             | 0.4 %             | 0.000 ppb              |
| 27Al (KED)  | 0.000 ppb             | 0.4 %             | 0.000 ppb              |
| 45Sc (KED)  | 94.020 %              |                   |                        |
| 51V (KED)   | 0.000 ppb             | 0.4 %             | 0.000 ppb              |
| 52Cr (KED)  | 0.000 ppb             | 0.3 %             | 0.000 ppb              |
| 55Mn (KED)  | 0.000 ppb             | 0.4 %             | 0.000 ppb              |
| 56Fe (KED)  | 0.000 ppb             | 0.3 %             | 0.000 ppb              |
| 58Ni (KED)  | 0.000 ppb             | 0.1 %             | 0.000 ppb              |
| 59Co (KED)  | 0.000 ppb             | 0.4 %             | 0.000 ppb              |
| 63Cu (KED)  | 0.000 ppb             | 0.2 %             | 0.000 ppb              |
| 64Zn (KED)  | 0.000 ppb             | 0.5 %             | 0.000 ppb              |
| 69Ga (KED)  | 0.000 ppb             | 0.4 %             | 0.000 ppb              |
| 75As (KED)  | 0.000 ppb             | 1.0 %             | 0.000 ppb              |
| 80Se (KED)  | 0.000 ppb             | 0.1 %             | 0.000 ppb              |
| 85Rb (KED)  | 0.000 ppb             | 0.7 %             | 0.000 ppb              |
| 88Sr (KED)  | 0.000 ppb             | 0.3 %             | 0.000 ppb              |
| 89Y (KED)   | 93.043 %              |                   |                        |
| 107Ag (KED) | 0.000 ppb             | 0.4 %             | 0.000 ppb              |
| 114Cd (KED) | 0.000 ppb             | 0.5 %             | 0.000 ppb              |
| 115In (KED) | 93.449 %              |                   |                        |
| 133Cs (KED) | 0.000 ppb             | 0.5 %             | 0.000 ppb              |
| 138Ba (KED) | 0.000 ppb             | 0.3 %             | 0.000 ppb              |
| 139La (KED) | 0.000 ppb             | 0.3 %             | 0.000 ppb              |
| 140Ce (KED) | 0.000 ppb             | 0.3 %             | 0.000 ppb              |
| 141Pr (KED) | 0.000 ppb             | 0.2 %             | 0.000 ppb              |
| 142Nd (KED) | 0.000 ppb             | 0.2 %             | 0.000 ppb              |
| 152Sm (KED) | 0.000 ppb             | 0.9 %             | 0.000 ppb              |
| 153Eu (KED) | 0.000 ppb             | 0.9 %             | 0.000 ppb              |
| 158Gd (KED) | 0.000 ppb             | 0.9 %             | 0.000 ppb              |
| 159Tb (KED) | 93.025 %              |                   |                        |
| 164Dy (KED) | 0.000 ppb             | 0.3 %             | 0.000 ppb              |
| 166Er (KED) | 0.000 ppb             | 0.1 %             | 0.000 ppb              |
| 169Tm (KED) | 0.000 ppb             | 0.5 %             | 0.000 ppb              |
| 174Yb (KED) | 0.000 ppb             | 0.3 %             | 0.000 ppb              |
| 175Lu (KED) | 0.000 ppb             | 0.0 %             | 0.000 ppb              |
| 205Tl (KED) | 0.000 ppb             | 0.2 %             | 0.000 ppb              |
| 208Pb (KED) | 0.000 ppb             | 0.3 %             | 0.000 ppb              |
| 209Bi (KED) | 92.572 %              |                   |                        |
| 232Th (KED) | 0.000 ppb             | 0.0 %             | 0.000 ppb              |
| 238U (KED)  | 0.000 ppb             | 0.3 %             | 0.000 ppb              |

**Standards:**

Analysis Index: 4  
 Analysis Name: 20+20  
 Analysis Type: STD  
 Analysis Started at: 11/3/2021 2:39:57 PM  
 Standard (Stock): std3  
 Standard DF: 1

| Category    | Concentration average | Concentration RSD | Standard Concentration |
|-------------|-----------------------|-------------------|------------------------|
| 6Li (KED)   | 103.572 %             |                   |                        |
| 9Be (KED)   | 19.771 ppb            | 1.4 %             | 20.000 ppb             |
| 11B (KED)   | 5.488 ppb             | 70.8 %            | 20.000 ppb             |
| 24Mg (KED)  | 19.593 ppb            | 3.4 %             | 20.000 ppb             |
| 27Al (KED)  | 19.281 ppb            | 3.2 %             | 20.000 ppb             |
| 45Sc (KED)  | 103.480 %             |                   |                        |
| 51V (KED)   | 20.129 ppb            | 0.5 %             | 20.000 ppb             |
| 52Cr (KED)  | 20.165 ppb            | 0.2 %             | 20.000 ppb             |
| 55Mn (KED)  | 20.268 ppb            | 0.9 %             | 20.000 ppb             |
| 56Fe (KED)  | 20.041 ppb            | 1.6 %             | 20.000 ppb             |
| 58Ni (KED)  | 20.577 ppb            | 2.0 %             | 20.000 ppb             |
| 59Co (KED)  | 20.339 ppb            | 2.1 %             | 20.000 ppb             |
| 63Cu (KED)  | 19.993 ppb            | 0.6 %             | 20.000 ppb             |
| 64Zn (KED)  | 18.409 ppb            | 0.5 %             | 20.000 ppb             |
| 69Ga (KED)  | 19.610 ppb            | 0.6 %             | 20.000 ppb             |
| 75As (KED)  | 19.602 ppb            | 0.9 %             | 20.000 ppb             |
| 80Se (KED)  | 19.579 ppb            | 0.6 %             | 20.000 ppb             |
| 85Rb (KED)  | 20.113 ppb            | 2.6 %             | 20.000 ppb             |
| 88Sr (KED)  | 20.288 ppb            | 0.9 %             | 20.000 ppb             |
| 89Y (KED)   | 103.176 %             |                   |                        |
| 107Ag (KED) | 19.543 ppb            | 1.4 %             | 20.000 ppb             |
| 114Cd (KED) | 19.905 ppb            | 1.1 %             | 20.000 ppb             |
| 115In (KED) | 102.719 %             |                   |                        |
| 133Cs (KED) | 19.846 ppb            | 1.3 %             | 20.000 ppb             |
| 138Ba (KED) | 19.896 ppb            | 1.0 %             | 20.000 ppb             |
| 139La (KED) | 19.671 ppb            | 0.9 %             | 20.000 ppb             |
| 140Ce (KED) | 19.923 ppb            | 1.6 %             | 20.000 ppb             |
| 141Pr (KED) | 19.520 ppb            | 1.5 %             | 20.000 ppb             |
| 142Nd (KED) | 19.785 ppb            | 1.0 %             | 20.000 ppb             |
| 152Sm (KED) | 20.166 ppb            | 2.0 %             | 20.000 ppb             |
| 153Eu (KED) | 19.538 ppb            | 1.5 %             | 20.000 ppb             |
| 158Gd (KED) | 19.942 ppb            | 2.3 %             | 20.000 ppb             |
| 159Tb (KED) | 102.076 %             |                   |                        |
| 164Dy (KED) | 19.943 ppb            | 1.6 %             | 20.000 ppb             |
| 166Er (KED) | 19.896 ppb            | 1.1 %             | 20.000 ppb             |
| 169Tm (KED) | 20.321 ppb            | 0.6 %             | 20.000 ppb             |
| 174Yb (KED) | 19.773 ppb            | 2.2 %             | 20.000 ppb             |
| 175Lu (KED) | 19.741 ppb            | 0.4 %             | 20.000 ppb             |
| 205Tl (KED) | 19.180 ppb            | 2.7 %             | 20.000 ppb             |
| 208Pb (KED) | 19.380 ppb            | 2.0 %             | 20.000 ppb             |
| 209Bi (KED) | 102.575 %             |                   |                        |
| 232Th (KED) | 19.386 ppb            | 1.0 %             | 20.000 ppb             |
| 238U (KED)  | 19.908 ppb            | 3.3 %             | 20.000 ppb             |

**Standards:**

Analysis Index: 5  
 Analysis Name: 50+20  
 Analysis Type: STD  
 Analysis Started at: 11/3/2021 2:43:14 PM  
 Standard (Stock): std1  
 Standard DF: 1

| Category    | Concentration average | Concentration RSD | Standard Concentration |
|-------------|-----------------------|-------------------|------------------------|
| 6Li (KED)   | 102.029 %             |                   |                        |
| 9Be (KED)   | 49.799 ppb            | 1.3 %             | 50.000 ppb             |
| 11B (KED)   | 41.110 ppb            | 8.6 %             | 50.000 ppb             |
| 24Mg (KED)  | 50.312 ppb            | 0.8 %             | 50.000 ppb             |
| 27Al (KED)  | 51.381 ppb            | 2.2 %             | 50.000 ppb             |
| 45Sc (KED)  | 103.073 %             |                   |                        |
| 51V (KED)   | 49.661 ppb            | 1.4 %             | 50.000 ppb             |
| 52Cr (KED)  | 50.005 ppb            | 1.0 %             | 50.000 ppb             |
| 55Mn (KED)  | 49.778 ppb            | 0.8 %             | 50.000 ppb             |
| 56Fe (KED)  | 50.075 ppb            | 1.3 %             | 50.000 ppb             |
| 58Ni (KED)  | 50.191 ppb            | 0.5 %             | 50.000 ppb             |
| 59Co (KED)  | 49.818 ppb            | 1.0 %             | 50.000 ppb             |
| 63Cu (KED)  | 50.286 ppb            | 1.7 %             | 50.000 ppb             |
| 64Zn (KED)  | 48.445 ppb            | 1.0 %             | 50.000 ppb             |
| 69Ga (KED)  | 49.374 ppb            | 0.9 %             | 50.000 ppb             |
| 75As (KED)  | 49.560 ppb            | 1.1 %             | 50.000 ppb             |
| 80Se (KED)  | 49.345 ppb            | 1.4 %             | 50.000 ppb             |
| 85Rb (KED)  | 49.634 ppb            | 0.9 %             | 50.000 ppb             |
| 88Sr (KED)  | 50.584 ppb            | 0.5 %             | 50.000 ppb             |
| 89Y (KED)   | 102.251 %             |                   |                        |
| 107Ag (KED) | 49.216 ppb            | 2.8 %             | 50.000 ppb             |
| 114Cd (KED) | 49.741 ppb            | 2.2 %             | 50.000 ppb             |
| 115In (KED) | 100.176 %             |                   |                        |
| 133Cs (KED) | 50.709 ppb            | 1.0 %             | 50.000 ppb             |
| 138Ba (KED) | 49.653 ppb            | 2.4 %             | 50.000 ppb             |
| 139La (KED) | 48.989 ppb            | 2.0 %             | 50.000 ppb             |
| 140Ce (KED) | 49.553 ppb            | 3.0 %             | 50.000 ppb             |
| 141Pr (KED) | 49.852 ppb            | 3.0 %             | 50.000 ppb             |
| 142Nd (KED) | 49.275 ppb            | 1.6 %             | 50.000 ppb             |
| 152Sm (KED) | 48.986 ppb            | 1.5 %             | 50.000 ppb             |
| 153Eu (KED) | 49.527 ppb            | 3.2 %             | 50.000 ppb             |
| 158Gd (KED) | 49.208 ppb            | 2.2 %             | 50.000 ppb             |
| 159Tb (KED) | 101.820 %             |                   |                        |
| 164Dy (KED) | 48.830 ppb            | 2.5 %             | 50.000 ppb             |
| 166Er (KED) | 48.759 ppb            | 3.6 %             | 50.000 ppb             |
| 169Tm (KED) | 50.172 ppb            | 1.2 %             | 50.000 ppb             |
| 174Yb (KED) | 49.878 ppb            | 1.0 %             | 50.000 ppb             |
| 175Lu (KED) | 49.795 ppb            | 3.2 %             | 50.000 ppb             |
| 205Tl (KED) | 50.144 ppb            | 2.1 %             | 50.000 ppb             |
| 208Pb (KED) | 49.729 ppb            | 0.6 %             | 50.000 ppb             |
| 209Bi (KED) | 100.643 %             |                   |                        |
| 232Th (KED) | 49.443 ppb            | 1.7 %             | 50.000 ppb             |
| 238U (KED)  | 50.138 ppb            | 1.7 %             | 50.000 ppb             |

## Standards:

Analysis Index: 6  
 Analysis Name: 100+20  
 Analysis Type: STD  
 Analysis Started at: 11/3/2021 2:46:26 PM  
 Standard (Stock): std2  
 Standard DF: 1

| Category    | Concentration average | Concentration RSD | Standard Concentration |
|-------------|-----------------------|-------------------|------------------------|
| 6Li (KED)   | 103.978 %             |                   |                        |
| 9Be (KED)   | 100.146 ppb           | 2.8 %             | 100.000 ppb            |
| 11B (KED)   | 107.347 ppb           | 1.5 %             | 100.000 ppb            |
| 24Mg (KED)  | 99.925 ppb            | 2.5 %             | 100.000 ppb            |
| 27Al (KED)  | 99.453 ppb            | 4.0 %             | 100.000 ppb            |
| 45Sc (KED)  | 104.985 %             |                   |                        |
| 51V (KED)   | 100.144 ppb           | 1.6 %             | 100.000 ppb            |
| 52Cr (KED)  | 99.964 ppb            | 2.4 %             | 100.000 ppb            |
| 55Mn (KED)  | 100.058 ppb           | 3.4 %             | 100.000 ppb            |
| 56Fe (KED)  | 99.954 ppb            | 2.9 %             | 100.000 ppb            |
| 58Ni (KED)  | 99.789 ppb            | 2.8 %             | 100.000 ppb            |
| 59Co (KED)  | 100.023 ppb           | 3.2 %             | 100.000 ppb            |
| 63Cu (KED)  | 99.859 ppb            | 0.2 %             | 100.000 ppb            |
| 64Zn (KED)  | 101.096 ppb           | 0.4 %             | 100.000 ppb            |
| 69Ga (KED)  | 100.391 ppb           | 1.0 %             | 100.000 ppb            |
| 75As (KED)  | 100.299 ppb           | 1.2 %             | 100.000 ppb            |
| 80Se (KED)  | 100.412 ppb           | 1.6 %             | 100.000 ppb            |
| 85Rb (KED)  | 100.161 ppb           | 0.4 %             | 100.000 ppb            |
| 88Sr (KED)  | 99.650 ppb            | 1.0 %             | 100.000 ppb            |
| 89Y (KED)   | 102.766 %             |                   |                        |
| 107Ag (KED) | 100.483 ppb           | 0.4 %             | 100.000 ppb            |
| 114Cd (KED) | 100.148 ppb           | 1.3 %             | 100.000 ppb            |
| 115In (KED) | 101.139 %             |                   |                        |
| 133Cs (KED) | 99.676 ppb            | 0.7 %             | 100.000 ppb            |
| 138Ba (KED) | 100.195 ppb           | 2.8 %             | 100.000 ppb            |
| 139La (KED) | 100.571 ppb           | 2.3 %             | 100.000 ppb            |
| 140Ce (KED) | 100.239 ppb           | 4.1 %             | 100.000 ppb            |
| 141Pr (KED) | 100.170 ppb           | 3.6 %             | 100.000 ppb            |
| 142Nd (KED) | 100.405 ppb           | 3.9 %             | 100.000 ppb            |
| 152Sm (KED) | 100.474 ppb           | 3.5 %             | 100.000 ppb            |
| 153Eu (KED) | 100.329 ppb           | 4.6 %             | 100.000 ppb            |
| 158Gd (KED) | 100.408 ppb           | 1.9 %             | 100.000 ppb            |
| 159Tb (KED) | 101.790 %             |                   |                        |
| 164Dy (KED) | 100.597 ppb           | 2.5 %             | 100.000 ppb            |
| 166Er (KED) | 100.641 ppb           | 5.5 %             | 100.000 ppb            |
| 169Tm (KED) | 99.850 ppb            | 5.3 %             | 100.000 ppb            |
| 174Yb (KED) | 100.106 ppb           | 2.1 %             | 100.000 ppb            |
| 175Lu (KED) | 100.154 ppb           | 3.9 %             | 100.000 ppb            |
| 205Tl (KED) | 100.092 ppb           | 1.8 %             | 100.000 ppb            |
| 208Pb (KED) | 100.259 ppb           | 2.6 %             | 100.000 ppb            |
| 209Bi (KED) | 99.674 %              |                   |                        |
| 232Th (KED) | 100.401 ppb           | 2.0 %             | 100.000 ppb            |
| 238U (KED)  | 99.949 ppb            | 0.6 %             | 100.000 ppb            |

## Sample List Summary:

Instrument ID: iCAP Q

| Index: | Label:              | Main<br>Runs: | Survey<br>Runs: | Start Time:          | User name:                    |
|--------|---------------------|---------------|-----------------|----------------------|-------------------------------|
| 1      | water               | 3             | 0               | 11/3/2021 2:30:16 PM | WINDOWS-UPCI4ER\Administrator |
| 2      | blk                 | 3             | 0               | 11/3/2021 2:33:14 PM | WINDOWS-UPCI4ER\Administrator |
| 3      | 0+20                | 3             | 0               | 11/3/2021 2:36:38 PM | WINDOWS-UPCI4ER\Administrator |
| 4      | 20+20               | 3             | 0               | 11/3/2021 2:39:57 PM | WINDOWS-UPCI4ER\Administrator |
| 5      | 50+20               | 3             | 0               | 11/3/2021 2:43:14 PM | WINDOWS-UPCI4ER\Administrator |
| 6      | 100+20              | 3             | 0               | 11/3/2021 2:46:26 PM | WINDOWS-UPCI4ER\Administrator |
| 7      | 507403chang jian    | 3             | 0               | 11/3/2021 2:49:43 PM | WINDOWS-UPCI4ER\Administrator |
| 8      | 804025duan jian     | 3             | 0               | 11/3/2021 2:53:12 PM | WINDOWS-UPCI4ER\Administrator |
| 9      | 80108               | 3             | 0               | 11/3/2021 2:56:25 PM | WINDOWS-UPCI4ER\Administrator |
| 10     | 853003chang jian    | 3             | 0               | 11/3/2021 2:59:37 PM | WINDOWS-UPCI4ER\Administrator |
| 11     | 501281duan jian     | 3             | 0               | 11/3/2021 3:02:47 PM | WINDOWS-UPCI4ER\Administrator |
| 12     | 714061duan jian     | 3             | 0               | 11/3/2021 3:05:58 PM | WINDOWS-UPCI4ER\Administrator |
| 13     | 803270chang jian    | 3             | 0               | 11/3/2021 3:09:11 PM | WINDOWS-UPCI4ER\Administrator |
| 14     | 80073               | 3             | 0               | 11/3/2021 3:12:23 PM | WINDOWS-UPCI4ER\Administrator |
| 15     | 805324chang jian    | 3             | 0               | 11/3/2021 3:15:31 PM | WINDOWS-UPCI4ER\Administrator |
| 16     | 706081chang jian    | 3             | 0               | 11/3/2021 3:18:44 PM | WINDOWS-UPCI4ER\Administrator |
| 17     | 500157duan jian     | 3             | 0               | 11/3/2021 3:21:57 PM | WINDOWS-UPCI4ER\Administrator |
| 18     | 80127               | 3             | 0               | 11/3/2021 3:25:06 PM | WINDOWS-UPCI4ER\Administrator |
| 19     | 804239              | 3             | 0               | 11/3/2021 3:28:19 PM | WINDOWS-UPCI4ER\Administrator |
| 20     | 605207duan jian     | 3             | 0               | 11/3/2021 3:31:33 PM | WINDOWS-UPCI4ER\Administrator |
| 21     | 80171               | 3             | 0               | 11/3/2021 3:34:49 PM | WINDOWS-UPCI4ER\Administrator |
| 22     | 803106chang jian    | 3             | 0               | 11/3/2021 3:38:03 PM | WINDOWS-UPCI4ER\Administrator |
| 23     | 80110               | 3             | 0               | 11/3/2021 3:41:14 PM | WINDOWS-UPCI4ER\Administrator |
| 24     | 503149chang jian    | 3             | 0               | 11/3/2021 3:44:29 PM | WINDOWS-UPCI4ER\Administrator |
| 25     | 80016jian           | 3             | 0               | 11/3/2021 3:47:43 PM | WINDOWS-UPCI4ER\Administrator |
| 26     | 80004jian           | 3             | 0               | 11/3/2021 3:50:54 PM | WINDOWS-UPCI4ER\Administrator |
| 27     | 80130jian           | 3             | 0               | 11/3/2021 3:54:06 PM | WINDOWS-UPCI4ER\Administrator |
| 28     | 80010jian           | 3             | 0               | 11/3/2021 3:57:25 PM | WINDOWS-UPCI4ER\Administrator |
| 29     | 603104jian          | 3             | 0               | 11/3/2021 4:00:39 PM | WINDOWS-UPCI4ER\Administrator |
| 30     | 80190jian           | 3             | 0               | 11/3/2021 4:03:51 PM | WINDOWS-UPCI4ER\Administrator |
| 31     | 805193jian          | 1             | 0               | 11/3/2021 4:07:09 PM | WINDOWS-UPCI4ER\Administrator |
| 32     | 80056jian           | 1             | 0               | 11/3/2021 4:09:01 PM | WINDOWS-UPCI4ER\Administrator |
| 33     | 80089jian           | 1             | 0               | 11/3/2021 4:10:58 PM | WINDOWS-UPCI4ER\Administrator |
| 34     | 855013jian          | 1             | 0               | 11/3/2021 4:12:56 PM | WINDOWS-UPCI4ER\Administrator |
| 35     | 80138jian           | 1             | 0               | 11/3/2021 4:14:59 PM | WINDOWS-UPCI4ER\Administrator |
| 36     | 804281 duan jian    | 1             | 0               | 11/3/2021 4:17:09 PM | WINDOWS-UPCI4ER\Administrator |
| 37     | 853057duan jian     | 1             | 0               | 11/3/2021 4:19:04 PM | WINDOWS-UPCI4ER\Administrator |
| 38     | 315042603860482jian | 1             | 0               | 11/3/2021 4:21:00 PM | WINDOWS-UPCI4ER\Administrator |
| 39     | 315047603860466jian | 1             | 0               | 11/3/2021 4:22:59 PM | WINDOWS-UPCI4ER\Administrator |
| 40     | 315042603860435jian | 1             | 0               | 11/3/2021 4:24:49 PM | WINDOWS-UPCI4ER\Administrator |
| 41     | 315047603860486jian | 1             | 0               | 11/3/2021 4:26:43 PM | WINDOWS-UPCI4ER\Administrator |
| 42     | 315047603860499jian | 1             | 0               | 11/3/2021 4:28:35 PM | WINDOWS-UPCI4ER\Administrator |
| 43     | 315047603860454jian | 1             | 0               | 11/3/2021 4:30:27 PM | WINDOWS-UPCI4ER\Administrator |
| 44     | 315042603860490jian | 1             | 0               | 11/3/2021 4:32:30 PM | WINDOWS-UPCI4ER\Administrator |
| 45     | 315047603860476jian | 1             | 0               | 11/3/2021 4:34:22 PM | WINDOWS-UPCI4ER\Administrator |
| 46     | 315047603860514jian | 1             | 0               | 11/3/2021 4:36:18 PM | WINDOWS-UPCI4ER\Administrator |

## Sample Summary

Instrument ID: iCAP Q

Analysis index: 1

Analysis name: water

Analysis started at: 11/3/2021 2:30:16 PM

User name: WINDOWS-UPCI4ER\Administrator

| Category    | Concentration average | Concentration RSD |
|-------------|-----------------------|-------------------|
| 6Li (KED)   | 0.041 %               | 173.2 %           |
| 11B (KED)   | Infinity ppb          |                   |
| 24Mg (KED)  | Infinity ppb          |                   |
| 27Al (KED)  | 60.628 ppb            | 179.9 %           |
| 45Sc (KED)  | 0.029 %               | 93.3 %            |
| 51V (KED)   | 2.105 ppb             | 60.7 %            |
| 52Cr (KED)  | 18.149 ppb            | 72.1 %            |
| 55Mn (KED)  | 5.461 ppb             | 60.8 %            |
| 56Fe (KED)  | 211.668 ppb           | 101.5 %           |
| 58Ni (KED)  | 38.531 ppb            | 54.4 %            |
| 59Co (KED)  | 0.142 ppb             | 175.2 %           |
| 63Cu (KED)  | Infinity ppb          |                   |
| 64Zn (KED)  | Infinity ppb          |                   |
| 75As (KED)  | Infinity ppb          |                   |
| 80Se (KED)  | Infinity ppb          |                   |
| 85Rb (KED)  | Infinity ppb          |                   |
| 89Y (KED)   | 0.000 %               |                   |
| 107Ag (KED) | Infinity ppb          |                   |
| 114Cd (KED) | Infinity ppb          |                   |
| 115In (KED) | 0.000 %               | 173.2 %           |
| 159Tb (KED) | 0.000 %               |                   |
| 205Tl (KED) | 82.137 ppb            | 20.2 %            |
| 208Pb (KED) | 26.989 ppb            | 9.4 %             |
| 209Bi (KED) | 0.001 %               | 13.3 %            |
| 232Th (KED) | 0.666 ppb             | 88.3 %            |
| 238U (KED)  | -0.001 ppb            | 0.0 %             |

| Category    | Concentration average | Intensity average | Intensity RSD |
|-------------|-----------------------|-------------------|---------------|
| 6Li (KED)   | 0.041 %               | 1 cps             | 173.2 %       |
| 9Be (KED)   |                       | 0 cps             |               |
| 11B (KED)   | Infinity ppb          | 18 cps            | 47.2 %        |
| 24Mg (KED)  | Infinity ppb          | 6 cps             | 34.6 %        |
| 27Al (KED)  | 60.628 ppb            | 1 cps             | 173.2 %       |
| 45Sc (KED)  | 0.029 %               | 14 cps            | 93.3 %        |
| 51V (KED)   | 2.105 ppb             | 3 cps             | 0.0 %         |
| 52Cr (KED)  | 18.149 ppb            | 41 cps            | 28.5 %        |
| 55Mn (KED)  | 5.461 ppb             | 7 cps             | 0.0 %         |
| 56Fe (KED)  | 211.668 ppb           | 412 cps           | 68.9 %        |
| 58Ni (KED)  | 38.531 ppb            | 117 cps           | 15.1 %        |
| 59Co (KED)  | 0.142 ppb             | 2 cps             | 173.2 %       |
| 63Cu (KED)  | Infinity ppb          | 38 cps            | 28.4 %        |
| 64Zn (KED)  | Infinity ppb          | 118 cps           | 41.7 %        |
| 69Ga (KED)  |                       | 1 cps             | 173.2 %       |
| 75As (KED)  | Infinity ppb          | 14 cps            | 35.3 %        |
| 80Se (KED)  | Infinity ppb          | 1,257 cps         | 3.4 %         |
| 85Rb (KED)  | Infinity ppb          | 7 cps             | 50.0 %        |
| 88Sr (KED)  |                       | 3 cps             | 100.0 %       |
| 89Y (KED)   | 0.000 %               | 0 cps             |               |
| 107Ag (KED) | Infinity ppb          | 14 cps            | 13.3 %        |
| 114Cd (KED) | Infinity ppb          | 2 cps             | 86.6 %        |

| Category    | Concentration average | Intensity average | Intensity RSD |
|-------------|-----------------------|-------------------|---------------|
| 115In (KED) | 0.000 %               | 1 cps             | 173.2 %       |
| 133Cs (KED) |                       | 2 cps             | 173.2 %       |
| 138Ba (KED) |                       | 10 cps            | 88.2 %        |
| 139La (KED) |                       | 0 cps             |               |
| 140Ce (KED) |                       | 0 cps             |               |
| 141Pr (KED) |                       | 1 cps             | 173.2 %       |
| 142Nd (KED) |                       | 0 cps             |               |
| 152Sm (KED) |                       | 0 cps             |               |
| 153Eu (KED) |                       | 0 cps             |               |
| 158Gd (KED) |                       | 0 cps             |               |
| 159Tb (KED) | 0.000 %               | 0 cps             |               |
| 164Dy (KED) |                       | 0 cps             |               |
| 166Er (KED) |                       | 1 cps             | 173.2 %       |
| 169Tm (KED) |                       | 1 cps             | 173.2 %       |
| 174Yb (KED) |                       | 0 cps             |               |
| 175Lu (KED) |                       | 3 cps             | 173.2 %       |
| 205Tl (KED) | 82.137 ppb            | 180 cps           | 17.0 %        |
| 208Pb (KED) | 26.989 ppb            | 42 cps            | 12.1 %        |
| 209Bi (KED) | 0.001 %               | 43 cps            | 13.3 %        |
| 232Th (KED) | 0.666 ppb             | 2 cps             | 86.6 %        |
| 238U (KED)  | -0.001 ppb            | 0 cps             |               |

## Sample Summary

Instrument ID: iCAP Q

Analysis index: 2

Analysis name: blk

Analysis started at: 11/3/2021 2:33:14 PM

User name: WINDOWS-UPCI4ER\Administrator

| Category    | Concentration average | Concentration RSD |
|-------------|-----------------------|-------------------|
| 6Li (KED)   | 100.000 %             |                   |
| 9Be (KED)   | 0.015 ppb             | 86.6 %            |
| 11B (KED)   | -2.854 ppb            | 49.2 %            |
| 24Mg (KED)  | -0.284 ppb            | 17.9 %            |
| 27Al (KED)  | -1.364 ppb            | 6.2 %             |
| 45Sc (KED)  | 100.000 %             |                   |
| 51V (KED)   | 0.000 ppb             | 66.5 %            |
| 52Cr (KED)  | -0.002 ppb            | 9.0 %             |
| 55Mn (KED)  | -0.003 ppb            | 66.1 %            |
| 56Fe (KED)  | -0.179 ppb            | 11.4 %            |
| 58Ni (KED)  | -0.002 ppb            | 61.7 %            |
| 59Co (KED)  | 0.000 ppb             | 274.3 %           |
| 63Cu (KED)  | -0.020 ppb            | 2.9 %             |
| 64Zn (KED)  | -1.680 ppb            | 0.9 %             |
| 69Ga (KED)  | -0.016 ppb            | 19.1 %            |
| 75As (KED)  | -0.002 ppb            | 245.5 %           |
| 80Se (KED)  | -0.424 ppb            | 53.3 %            |
| 85Rb (KED)  | -0.002 ppb            | 81.6 %            |
| 88Sr (KED)  | -0.007 ppb            | 14.6 %            |
| 89Y (KED)   | 100.000 %             |                   |
| 107Ag (KED) | 0.000 ppb             | 703.7 %           |
| 114Cd (KED) | -0.001 ppb            | 105.2 %           |
| 115In (KED) | 100.000 %             |                   |
| 133Cs (KED) | -0.001 ppb            | 24.6 %            |
| 138Ba (KED) | -0.059 ppb            | 0.8 %             |
| 139La (KED) | -0.001 ppb            | 33.9 %            |
| 140Ce (KED) | -0.006 ppb            | 2.1 %             |
| 141Pr (KED) | 0.000 ppb             | 49.2 %            |
| 142Nd (KED) | -0.004 ppb            | 19.6 %            |
| 152Sm (KED) | 0.000 ppb             | 64.6 %            |
| 153Eu (KED) | 0.000 ppb             | 1,623.9 %         |
| 158Gd (KED) | 0.000 ppb             | 85.2 %            |
| 159Tb (KED) | 100.000 %             |                   |
| 164Dy (KED) | 0.000 ppb             | 36.5 %            |
| 166Er (KED) | -0.001 ppb            | 88.0 %            |
| 169Tm (KED) | 0.000 ppb             | 125.8 %           |
| 174Yb (KED) | 0.000 ppb             | 17.6 %            |
| 175Lu (KED) | 0.009 ppb             | 55.7 %            |
| 205Tl (KED) | 0.000 ppb             | 60.1 %            |
| 208Pb (KED) | -0.042 ppb            | 0.7 %             |
| 209Bi (KED) | 100.000 %             |                   |
| 232Th (KED) | 0.000 ppb             | 29.6 %            |
| 238U (KED)  | 0.000 ppb             | 106.6 %           |

| Category   | Concentration average | Intensity average | Intensity RSD |
|------------|-----------------------|-------------------|---------------|
| 6Li (KED)  | 100.000 %             | 2,738 cps         | 5.1 %         |
| 9Be (KED)  | 0.015 ppb             | 2 cps             | 86.6 %        |
| 11B (KED)  | -2.854 ppb            | 1,418 cps         | 2.3 %         |
| 24Mg (KED) | -0.284 ppb            | 133 cps           | 19.8 %        |
| 27Al (KED) | -1.364 ppb            | 129 cps           | 9.1 %         |

| Category    | Concentration average | Intensity average | Intensity RSD |
|-------------|-----------------------|-------------------|---------------|
| 45Sc (KED)  | 100.000 %             | 50,360 cps        | 1.3 %         |
| 51V (KED)   | 0.000 ppb             | 8 cps             | 24.7 %        |
| 52Cr (KED)  | -0.002 ppb            | 83 cps            | 4.0 %         |
| 55Mn (KED)  | -0.003 ppb            | 71 cps            | 17.7 %        |
| 56Fe (KED)  | -0.179 ppb            | 2,390 cps         | 9.5 %         |
| 58Ni (KED)  | -0.002 ppb            | 281 cps           | 6.7 %         |
| 59Co (KED)  | 0.000 ppb             | 48 cps            | 35.8 %        |
| 63Cu (KED)  | -0.020 ppb            | 578 cps           | 1.5 %         |
| 64Zn (KED)  | -1.680 ppb            | 3,079 cps         | 3.2 %         |
| 69Ga (KED)  | -0.016 ppb            | 69 cps            | 28.4 %        |
| 75As (KED)  | -0.002 ppb            | 8 cps             | 99.0 %        |
| 80Se (KED)  | -0.424 ppb            | 1,241 cps         | 7.4 %         |
| 85Rb (KED)  | -0.002 ppb            | 10 cps            | 88.2 %        |
| 88Sr (KED)  | -0.007 ppb            | 154 cps           | 5.4 %         |
| 89Y (KED)   | 100.000 %             | 444,973 cps       | 0.7 %         |
| 107Ag (KED) | 0.000 ppb             | 39 cps            | 32.5 %        |
| 114Cd (KED) | -0.001 ppb            | 31 cps            | 49.5 %        |
| 115In (KED) | 100.000 %             | 802,552 cps       | 0.5 %         |
| 133Cs (KED) | -0.001 ppb            | 19 cps            | 20.4 %        |
| 138Ba (KED) | -0.059 ppb            | 1,226 cps         | 4.8 %         |
| 139La (KED) | -0.001 ppb            | 37 cps            | 41.7 %        |
| 140Ce (KED) | -0.006 ppb            | 573 cps           | 2.5 %         |
| 141Pr (KED) | 0.000 ppb             | 23 cps            | 42.9 %        |
| 142Nd (KED) | -0.004 ppb            | 83 cps            | 38.2 %        |
| 152Sm (KED) | 0.000 ppb             | 2 cps             | 173.2 %       |
| 153Eu (KED) | 0.000 ppb             | 11 cps            | 75.5 %        |
| 158Gd (KED) | 0.000 ppb             | 9 cps             | 21.7 %        |
| 159Tb (KED) | 100.000 %             | 4,015,074 cps     | 3.3 %         |
| 164Dy (KED) | 0.000 ppb             | 14 cps            | 35.3 %        |
| 166Er (KED) | -0.001 ppb            | 294 cps           | 17.0 %        |
| 169Tm (KED) | 0.000 ppb             | 13 cps            | 43.3 %        |
| 174Yb (KED) | 0.000 ppb             | 10 cps            | 33.3 %        |
| 175Lu (KED) | 0.009 ppb             | 16,396 cps        | 1.2 %         |
| 205Tl (KED) | 0.000 ppb             | 57 cps            | 11.8 %        |
| 208Pb (KED) | -0.042 ppb            | 4,645 cps         | 0.7 %         |
| 209Bi (KED) | 100.000 %             | 3,417,862 cps     | 1.1 %         |
| 232Th (KED) | 0.000 ppb             | 379 cps           | 7.5 %         |
| 238U (KED)  | 0.000 ppb             | 138 cps           | 33.9 %        |

## Sample Summary

Instrument ID: iCAP Q

Analysis index: 3

Analysis name: 0+20

Analysis started at: 11/3/2021 2:36:38 PM

User name: WINDOWS-UPCI4ER\Administrator

| Category    | Concentration average | Concentration RSD |
|-------------|-----------------------|-------------------|
| 6Li (KED)   | 94.439 %              |                   |
| 9Be (KED)   | 0.000 ppb             |                   |
| 11B (KED)   | 0.000 ppb             | 0.1 %             |
| 24Mg (KED)  | 0.000 ppb             | 0.4 %             |
| 27Al (KED)  | 0.000 ppb             | 0.4 %             |
| 45Sc (KED)  | 94.020 %              |                   |
| 51V (KED)   | 0.000 ppb             | 0.4 %             |
| 52Cr (KED)  | 0.000 ppb             | 0.3 %             |
| 55Mn (KED)  | 0.000 ppb             | 0.4 %             |
| 56Fe (KED)  | 0.000 ppb             | 0.3 %             |
| 58Ni (KED)  | 0.000 ppb             | 0.1 %             |
| 59Co (KED)  | 0.000 ppb             | 0.4 %             |
| 63Cu (KED)  | 0.000 ppb             | 0.2 %             |
| 64Zn (KED)  | 0.000 ppb             | 0.5 %             |
| 69Ga (KED)  | 0.000 ppb             | 0.4 %             |
| 75As (KED)  | 0.000 ppb             | 1.0 %             |
| 80Se (KED)  | 0.000 ppb             | 0.1 %             |
| 85Rb (KED)  | 0.000 ppb             | 0.7 %             |
| 88Sr (KED)  | 0.000 ppb             | 0.3 %             |
| 89Y (KED)   | 93.043 %              |                   |
| 107Ag (KED) | 0.000 ppb             | 0.4 %             |
| 114Cd (KED) | 0.000 ppb             | 0.5 %             |
| 115In (KED) | 93.449 %              |                   |
| 133Cs (KED) | 0.000 ppb             | 0.5 %             |
| 138Ba (KED) | 0.000 ppb             | 0.3 %             |
| 139La (KED) | 0.000 ppb             | 0.3 %             |
| 140Ce (KED) | 0.000 ppb             | 0.3 %             |
| 141Pr (KED) | 0.000 ppb             | 0.2 %             |
| 142Nd (KED) | 0.000 ppb             | 0.2 %             |
| 152Sm (KED) | 0.000 ppb             | 0.9 %             |
| 153Eu (KED) | 0.000 ppb             | 0.9 %             |
| 158Gd (KED) | 0.000 ppb             | 0.9 %             |
| 159Tb (KED) | 93.025 %              |                   |
| 164Dy (KED) | 0.000 ppb             | 0.3 %             |
| 166Er (KED) | 0.000 ppb             | 0.1 %             |
| 169Tm (KED) | 0.000 ppb             | 0.5 %             |
| 174Yb (KED) | 0.000 ppb             | 0.3 %             |
| 175Lu (KED) | 0.000 ppb             | 0.0 %             |
| 205Tl (KED) | 0.000 ppb             | 0.2 %             |
| 208Pb (KED) | 0.000 ppb             | 0.3 %             |
| 209Bi (KED) | 92.572 %              |                   |
| 232Th (KED) | 0.000 ppb             | 0.0 %             |
| 238U (KED)  | 0.000 ppb             | 0.3 %             |

| Category   | Concentration average | Intensity average | Intensity RSD |
|------------|-----------------------|-------------------|---------------|
| 6Li (KED)  | 94.439 %              | 2,586 cps         | 1.9 %         |
| 9Be (KED)  | 0.000 ppb             | 0 cps             |               |
| 11B (KED)  | 0.000 ppb             | 1,501 cps         | 6.2 %         |
| 24Mg (KED) | 0.000 ppb             | 268 cps           | 37.8 %        |
| 27Al (KED) | 0.000 ppb             | 289 cps           | 38.8 %        |

| Category    | Concentration average | Intensity average | Intensity RSD |
|-------------|-----------------------|-------------------|---------------|
| 45Sc (KED)  | 94.020 %              | 47,349 cps        | 4.0 %         |
| 51V (KED)   | 0.000 ppb             | 10 cps            | 33.3 %        |
| 52Cr (KED)  | 0.000 ppb             | 106 cps           | 25.5 %        |
| 55Mn (KED)  | 0.000 ppb             | 86 cps            | 38.2 %        |
| 56Fe (KED)  | 0.000 ppb             | 4,306 cps         | 28.2 %        |
| 58Ni (KED)  | 0.000 ppb             | 291 cps           | 10.6 %        |
| 59Co (KED)  | 0.000 ppb             | 39 cps            | 39.6 %        |
| 63Cu (KED)  | 0.000 ppb             | 918 cps           | 18.2 %        |
| 64Zn (KED)  | 0.000 ppb             | 10,868 cps        | 43.7 %        |
| 69Ga (KED)  | 0.000 ppb             | 159 cps           | 35.3 %        |
| 75As (KED)  | 0.000 ppb             | 10 cps            | 100.0 %       |
| 80Se (KED)  | 0.000 ppb             | 1,328 cps         | 2.1 %         |
| 85Rb (KED)  | 0.000 ppb             | 19 cps            | 66.8 %        |
| 88Sr (KED)  | 0.000 ppb             | 194 cps           | 25.1 %        |
| 89Y (KED)   | 93.043 %              | 414,016 cps       | 4.6 %         |
| 107Ag (KED) | 0.000 ppb             | 38 cps            | 36.7 %        |
| 114Cd (KED) | 0.000 ppb             | 42 cps            | 47.6 %        |
| 115In (KED) | 93.449 %              | 749,978 cps       | 4.1 %         |
| 133Cs (KED) | 0.000 ppb             | 32 cps            | 48.9 %        |
| 138Ba (KED) | 0.000 ppb             | 3,306 cps         | 29.8 %        |
| 139La (KED) | 0.000 ppb             | 80 cps            | 29.2 %        |
| 140Ce (KED) | 0.000 ppb             | 1,134 cps         | 24.5 %        |
| 141Pr (KED) | 0.000 ppb             | 42 cps            | 18.2 %        |
| 142Nd (KED) | 0.000 ppb             | 240 cps           | 15.3 %        |
| 152Sm (KED) | 0.000 ppb             | 8 cps             | 89.2 %        |
| 153Eu (KED) | 0.000 ppb             | 10 cps            | 88.2 %        |
| 158Gd (KED) | 0.000 ppb             | 10 cps            | 88.2 %        |
| 159Tb (KED) | 93.025 %              | 3,735,015 cps     | 2.7 %         |
| 164Dy (KED) | 0.000 ppb             | 28 cps            | 25.0 %        |
| 166Er (KED) | 0.000 ppb             | 331 cps           | 4.2 %         |
| 169Tm (KED) | 0.000 ppb             | 8 cps             | 49.5 %        |
| 174Yb (KED) | 0.000 ppb             | 26 cps            | 27.2 %        |
| 175Lu (KED) | 0.000 ppb             | 14,047 cps        | 5.8 %         |
| 205Tl (KED) | 0.000 ppb             | 42 cps            | 16.4 %        |
| 208Pb (KED) | 0.000 ppb             | 9,029 cps         | 28.0 %        |
| 209Bi (KED) | 92.572 %              | 3,163,983 cps     | 2.3 %         |
| 232Th (KED) | 0.000 ppb             | 250 cps           | 2.7 %         |
| 238U (KED)  | 0.000 ppb             | 169 cps           | 26.9 %        |

## Sample Summary

Instrument ID: iCAP Q

Analysis index: 4

Analysis name: 20+20

Analysis started at: 11/3/2021 2:39:57 PM

User name: WINDOWS-UPCI4ER\Administrator

| Category    | Concentration average | Concentration RSD |
|-------------|-----------------------|-------------------|
| 6Li (KED)   | 103.572 %             |                   |
| 9Be (KED)   | 19.771 ppb            | 1.4 %             |
| 11B (KED)   | 5.488 ppb             | 70.8 %            |
| 24Mg (KED)  | 19.593 ppb            | 3.4 %             |
| 27Al (KED)  | 19.281 ppb            | 3.2 %             |
| 45Sc (KED)  | 103.480 %             |                   |
| 51V (KED)   | 20.129 ppb            | 0.5 %             |
| 52Cr (KED)  | 20.165 ppb            | 0.2 %             |
| 55Mn (KED)  | 20.268 ppb            | 0.9 %             |
| 56Fe (KED)  | 20.041 ppb            | 1.6 %             |
| 58Ni (KED)  | 20.577 ppb            | 2.0 %             |
| 59Co (KED)  | 20.339 ppb            | 2.1 %             |
| 63Cu (KED)  | 19.993 ppb            | 0.6 %             |
| 64Zn (KED)  | 18.409 ppb            | 0.5 %             |
| 69Ga (KED)  | 19.610 ppb            | 0.6 %             |
| 75As (KED)  | 19.602 ppb            | 0.9 %             |
| 80Se (KED)  | 19.579 ppb            | 0.6 %             |
| 85Rb (KED)  | 20.113 ppb            | 2.6 %             |
| 88Sr (KED)  | 20.288 ppb            | 0.9 %             |
| 89Y (KED)   | 103.176 %             |                   |
| 107Ag (KED) | 19.543 ppb            | 1.4 %             |
| 114Cd (KED) | 19.905 ppb            | 1.1 %             |
| 115In (KED) | 102.719 %             |                   |
| 133Cs (KED) | 19.846 ppb            | 1.3 %             |
| 138Ba (KED) | 19.896 ppb            | 1.0 %             |
| 139La (KED) | 19.671 ppb            | 0.9 %             |
| 140Ce (KED) | 19.923 ppb            | 1.6 %             |
| 141Pr (KED) | 19.520 ppb            | 1.5 %             |
| 142Nd (KED) | 19.785 ppb            | 1.0 %             |
| 152Sm (KED) | 20.166 ppb            | 2.0 %             |
| 153Eu (KED) | 19.538 ppb            | 1.5 %             |
| 158Gd (KED) | 19.942 ppb            | 2.3 %             |
| 159Tb (KED) | 102.076 %             |                   |
| 164Dy (KED) | 19.943 ppb            | 1.6 %             |
| 166Er (KED) | 19.896 ppb            | 1.1 %             |
| 169Tm (KED) | 20.321 ppb            | 0.6 %             |
| 174Yb (KED) | 19.773 ppb            | 2.2 %             |
| 175Lu (KED) | 19.741 ppb            | 0.4 %             |
| 205Tl (KED) | 19.180 ppb            | 2.7 %             |
| 208Pb (KED) | 19.380 ppb            | 2.0 %             |
| 209Bi (KED) | 102.575 %             |                   |
| 232Th (KED) | 19.386 ppb            | 1.0 %             |
| 238U (KED)  | 19.908 ppb            | 3.3 %             |

| Category   | Concentration average | Intensity average | Intensity RSD |
|------------|-----------------------|-------------------|---------------|
| 6Li (KED)  | 103.572 %             | 2,836 cps         | 2.3 %         |
| 9Be (KED)  | 19.771 ppb            | 2,943 cps         | 1.3 %         |
| 11B (KED)  | 5.488 ppb             | 1,989 cps         | 13.3 %        |
| 24Mg (KED) | 19.593 ppb            | 11,096 cps        | 1.2 %         |
| 27Al (KED) | 19.281 ppb            | 2,981 cps         | 3.3 %         |

| Category    | Concentration average | Intensity average | Intensity RSD |
|-------------|-----------------------|-------------------|---------------|
| 45Sc (KED)  | 103.480 %             | 52,113 cps        | 1.5 %         |
| 51V (KED)   | 20.129 ppb            | 184,474 cps       | 1.1 %         |
| 52Cr (KED)  | 20.165 ppb            | 289,502 cps       | 1.6 %         |
| 55Mn (KED)  | 20.268 ppb            | 143,016 cps       | 1.3 %         |
| 56Fe (KED)  | 20.041 ppb            | 262,086 cps       | 1.5 %         |
| 58Ni (KED)  | 20.577 ppb            | 339,202 cps       | 0.9 %         |
| 59Co (KED)  | 20.339 ppb            | 545,843 cps       | 0.7 %         |
| 63Cu (KED)  | 19.993 ppb            | 420,432 cps       | 0.7 %         |
| 64Zn (KED)  | 18.409 ppb            | 111,388 cps       | 0.4 %         |
| 69Ga (KED)  | 19.610 ppb            | 133,289 cps       | 0.5 %         |
| 75As (KED)  | 19.602 ppb            | 30,507 cps        | 0.9 %         |
| 80Se (KED)  | 19.579 ppb            | 10,450 cps        | 0.5 %         |
| 85Rb (KED)  | 20.113 ppb            | 121,854 cps       | 2.5 %         |
| 88Sr (KED)  | 20.288 ppb            | 171,855 cps       | 0.8 %         |
| 89Y (KED)   | 103.176 %             | 459,104 cps       | 0.1 %         |
| 107Ag (KED) | 19.543 ppb            | 1,075,479 cps     | 1.5 %         |
| 114Cd (KED) | 19.905 ppb            | 399,548 cps       | 0.5 %         |
| 115In (KED) | 102.719 %             | 824,371 cps       | 0.6 %         |
| 133Cs (KED) | 19.846 ppb            | 604,661 cps       | 0.7 %         |
| 138Ba (KED) | 19.896 ppb            | 815,315 cps       | 1.1 %         |
| 139La (KED) | 19.671 ppb            | 1,758,926 cps     | 1.1 %         |
| 140Ce (KED) | 19.923 ppb            | 2,353,322 cps     | 1.9 %         |
| 141Pr (KED) | 19.520 ppb            | 2,372,734 cps     | 1.3 %         |
| 142Nd (KED) | 19.785 ppb            | 965,001 cps       | 0.7 %         |
| 152Sm (KED) | 20.166 ppb            | 864,573 cps       | 1.9 %         |
| 153Eu (KED) | 19.538 ppb            | 1,683,100 cps     | 1.3 %         |
| 158Gd (KED) | 19.942 ppb            | 1,165,152 cps     | 2.3 %         |
| 159Tb (KED) | 102.076 %             | 4,098,409 cps     | 0.3 %         |
| 164Dy (KED) | 19.943 ppb            | 1,273,878 cps     | 1.9 %         |
| 166Er (KED) | 19.896 ppb            | 1,516,558 cps     | 0.9 %         |
| 169Tm (KED) | 20.321 ppb            | 4,996,141 cps     | 0.3 %         |
| 174Yb (KED) | 19.773 ppb            | 1,767,505 cps     | 2.0 %         |
| 175Lu (KED) | 19.741 ppb            | 2,996,213 cps     | 0.6 %         |
| 205Tl (KED) | 19.180 ppb            | 3,427,988 cps     | 0.8 %         |
| 208Pb (KED) | 19.380 ppb            | 2,463,832 cps     | 1.4 %         |
| 209Bi (KED) | 102.575 %             | 3,505,864 cps     | 2.3 %         |
| 232Th (KED) | 19.386 ppb            | 5,091,903 cps     | 2.4 %         |
| 238U (KED)  | 19.908 ppb            | 5,761,381 cps     | 1.2 %         |

## Sample Summary

Instrument ID: iCAP Q

Analysis index: 5

Analysis name: 50+20

Analysis started at: 11/3/2021 2:43:14 PM

User name: WINDOWS-UPCI4ER\Administrator

| Category    | Concentration average | Concentration RSD |
|-------------|-----------------------|-------------------|
| 6Li (KED)   | 102.029 %             |                   |
| 9Be (KED)   | 49.799 ppb            | 1.3 %             |
| 11B (KED)   | 41.110 ppb            | 8.6 %             |
| 24Mg (KED)  | 50.312 ppb            | 0.8 %             |
| 27Al (KED)  | 51.381 ppb            | 2.2 %             |
| 45Sc (KED)  | 103.073 %             |                   |
| 51V (KED)   | 49.661 ppb            | 1.4 %             |
| 52Cr (KED)  | 50.005 ppb            | 1.0 %             |
| 55Mn (KED)  | 49.778 ppb            | 0.8 %             |
| 56Fe (KED)  | 50.075 ppb            | 1.3 %             |
| 58Ni (KED)  | 50.191 ppb            | 0.5 %             |
| 59Co (KED)  | 49.818 ppb            | 1.0 %             |
| 63Cu (KED)  | 50.286 ppb            | 1.7 %             |
| 64Zn (KED)  | 48.445 ppb            | 1.0 %             |
| 69Ga (KED)  | 49.374 ppb            | 0.9 %             |
| 75As (KED)  | 49.560 ppb            | 1.1 %             |
| 80Se (KED)  | 49.345 ppb            | 1.4 %             |
| 85Rb (KED)  | 49.634 ppb            | 0.9 %             |
| 88Sr (KED)  | 50.584 ppb            | 0.5 %             |
| 89Y (KED)   | 102.251 %             |                   |
| 107Ag (KED) | 49.216 ppb            | 2.8 %             |
| 114Cd (KED) | 49.741 ppb            | 2.2 %             |
| 115In (KED) | 100.176 %             |                   |
| 133Cs (KED) | 50.709 ppb            | 1.0 %             |
| 138Ba (KED) | 49.653 ppb            | 2.4 %             |
| 139La (KED) | 48.989 ppb            | 2.0 %             |
| 140Ce (KED) | 49.553 ppb            | 3.0 %             |
| 141Pr (KED) | 49.852 ppb            | 3.0 %             |
| 142Nd (KED) | 49.275 ppb            | 1.6 %             |
| 152Sm (KED) | 48.986 ppb            | 1.5 %             |
| 153Eu (KED) | 49.527 ppb            | 3.2 %             |
| 158Gd (KED) | 49.208 ppb            | 2.2 %             |
| 159Tb (KED) | 101.820 %             |                   |
| 164Dy (KED) | 48.830 ppb            | 2.5 %             |
| 166Er (KED) | 48.759 ppb            | 3.6 %             |
| 169Tm (KED) | 50.172 ppb            | 1.2 %             |
| 174Yb (KED) | 49.878 ppb            | 1.0 %             |
| 175Lu (KED) | 49.795 ppb            | 3.2 %             |
| 205Tl (KED) | 50.144 ppb            | 2.1 %             |
| 208Pb (KED) | 49.729 ppb            | 0.6 %             |
| 209Bi (KED) | 100.643 %             |                   |
| 232Th (KED) | 49.443 ppb            | 1.7 %             |
| 238U (KED)  | 50.138 ppb            | 1.7 %             |

| Category   | Concentration average | Intensity average | Intensity RSD |
|------------|-----------------------|-------------------|---------------|
| 6Li (KED)  | 102.029 %             | 2,794 cps         | 0.8 %         |
| 9Be (KED)  | 49.799 ppb            | 7,302 cps         | 0.6 %         |
| 11B (KED)  | 41.110 ppb            | 4,130 cps         | 4.4 %         |
| 24Mg (KED) | 50.312 ppb            | 27,626 cps        | 0.3 %         |
| 27Al (KED) | 51.381 ppb            | 7,380 cps         | 1.6 %         |

| Category    | Concentration average | Intensity average | Intensity RSD |
|-------------|-----------------------|-------------------|---------------|
| 45Sc (KED)  | 103.073 %             | 51,908 cps        | 1.0 %         |
| 51V (KED)   | 49.661 ppb            | 453,295 cps       | 0.6 %         |
| 52Cr (KED)  | 50.005 ppb            | 714,929 cps       | 1.9 %         |
| 55Mn (KED)  | 49.778 ppb            | 349,723 cps       | 0.4 %         |
| 56Fe (KED)  | 50.075 ppb            | 645,151 cps       | 0.3 %         |
| 58Ni (KED)  | 50.191 ppb            | 823,797 cps       | 0.6 %         |
| 59Co (KED)  | 49.818 ppb            | 1,331,907 cps     | 1.1 %         |
| 63Cu (KED)  | 50.286 ppb            | 1,046,328 cps     | 0.9 %         |
| 64Zn (KED)  | 48.445 ppb            | 270,702 cps       | 0.3 %         |
| 69Ga (KED)  | 49.374 ppb            | 332,302 cps       | 0.4 %         |
| 75As (KED)  | 49.560 ppb            | 76,419 cps        | 0.5 %         |
| 80Se (KED)  | 49.345 ppb            | 23,880 cps        | 1.9 %         |
| 85Rb (KED)  | 49.634 ppb            | 297,989 cps       | 1.8 %         |
| 88Sr (KED)  | 50.584 ppb            | 424,317 cps       | 1.1 %         |
| 89Y (KED)   | 102.251 %             | 454,992 cps       | 1.1 %         |
| 107Ag (KED) | 49.216 ppb            | 2,640,921 cps     | 2.2 %         |
| 114Cd (KED) | 49.741 ppb            | 973,542 cps       | 1.0 %         |
| 115In (KED) | 100.176 %             | 803,962 cps       | 1.2 %         |
| 133Cs (KED) | 50.709 ppb            | 1,506,640 cps     | 0.3 %         |
| 138Ba (KED) | 49.653 ppb            | 2,023,239 cps     | 0.5 %         |
| 139La (KED) | 48.989 ppb            | 4,367,744 cps     | 1.0 %         |
| 140Ce (KED) | 49.553 ppb            | 5,833,400 cps     | 1.0 %         |
| 141Pr (KED) | 49.852 ppb            | 6,041,173 cps     | 0.7 %         |
| 142Nd (KED) | 49.275 ppb            | 2,396,275 cps     | 1.6 %         |
| 152Sm (KED) | 48.986 ppb            | 2,094,349 cps     | 1.6 %         |
| 153Eu (KED) | 49.527 ppb            | 4,254,192 cps     | 2.7 %         |
| 158Gd (KED) | 49.208 ppb            | 2,866,760 cps     | 1.2 %         |
| 159Tb (KED) | 101.820 %             | 4,088,166 cps     | 2.9 %         |
| 164Dy (KED) | 48.830 ppb            | 3,109,567 cps     | 0.4 %         |
| 166Er (KED) | 48.759 ppb            | 3,704,377 cps     | 0.9 %         |
| 169Tm (KED) | 50.172 ppb            | 12,301,803 cps    | 1.8 %         |
| 174Yb (KED) | 49.878 ppb            | 4,446,607 cps     | 1.9 %         |
| 175Lu (KED) | 49.795 ppb            | 7,511,137 cps     | 1.6 %         |
| 205Tl (KED) | 50.144 ppb            | 8,794,704 cps     | 0.5 %         |
| 208Pb (KED) | 49.729 ppb            | 6,189,396 cps     | 2.3 %         |
| 209Bi (KED) | 100.643 %             | 3,439,835 cps     | 1.6 %         |
| 232Th (KED) | 49.443 ppb            | 12,739,453 cps    | 0.1 %         |
| 238U (KED)  | 50.138 ppb            | 14,240,350 cps    | 0.2 %         |

## Sample Summary

Instrument ID: iCAP Q

Analysis index: 6

Analysis name: 100+20

Analysis started at: 11/3/2021 2:46:26 PM

User name: WINDOWS-UPCI4ER\Administrator

| Category    | Concentration average | Concentration RSD |
|-------------|-----------------------|-------------------|
| 6Li (KED)   | 103.978 %             |                   |
| 9Be (KED)   | 100.146 ppb           | 2.8 %             |
| 11B (KED)   | 107.347 ppb           | 1.5 %             |
| 24Mg (KED)  | 99.925 ppb            | 2.5 %             |
| 27Al (KED)  | 99.453 ppb            | 4.0 %             |
| 45Sc (KED)  | 104.985 %             |                   |
| 51V (KED)   | 100.144 ppb           | 1.6 %             |
| 52Cr (KED)  | 99.964 ppb            | 2.4 %             |
| 55Mn (KED)  | 100.058 ppb           | 3.4 %             |
| 56Fe (KED)  | 99.954 ppb            | 2.9 %             |
| 58Ni (KED)  | 99.789 ppb            | 2.8 %             |
| 59Co (KED)  | 100.023 ppb           | 3.2 %             |
| 63Cu (KED)  | 99.859 ppb            | 0.2 %             |
| 64Zn (KED)  | 101.096 ppb           | 0.4 %             |
| 69Ga (KED)  | 100.391 ppb           | 1.0 %             |
| 75As (KED)  | 100.299 ppb           | 1.2 %             |
| 80Se (KED)  | 100.412 ppb           | 1.6 %             |
| 85Rb (KED)  | 100.161 ppb           | 0.4 %             |
| 88Sr (KED)  | 99.650 ppb            | 1.0 %             |
| 89Y (KED)   | 102.766 %             |                   |
| 107Ag (KED) | 100.483 ppb           | 0.4 %             |
| 114Cd (KED) | 100.148 ppb           | 1.3 %             |
| 115In (KED) | 101.139 %             |                   |
| 133Cs (KED) | 99.676 ppb            | 0.7 %             |
| 138Ba (KED) | 100.195 ppb           | 2.8 %             |
| 139La (KED) | 100.571 ppb           | 2.3 %             |
| 140Ce (KED) | 100.239 ppb           | 4.1 %             |
| 141Pr (KED) | 100.170 ppb           | 3.6 %             |
| 142Nd (KED) | 100.405 ppb           | 3.9 %             |
| 152Sm (KED) | 100.474 ppb           | 3.5 %             |
| 153Eu (KED) | 100.329 ppb           | 4.6 %             |
| 158Gd (KED) | 100.408 ppb           | 1.9 %             |
| 159Tb (KED) | 101.790 %             |                   |
| 164Dy (KED) | 100.597 ppb           | 2.5 %             |
| 166Er (KED) | 100.641 ppb           | 5.5 %             |
| 169Tm (KED) | 99.850 ppb            | 5.3 %             |
| 174Yb (KED) | 100.106 ppb           | 2.1 %             |
| 175Lu (KED) | 100.154 ppb           | 3.9 %             |
| 205Tl (KED) | 100.092 ppb           | 1.8 %             |
| 208Pb (KED) | 100.259 ppb           | 2.6 %             |
| 209Bi (KED) | 99.674 %              |                   |
| 232Th (KED) | 100.401 ppb           | 2.0 %             |
| 238U (KED)  | 99.949 ppb            | 0.6 %             |

| Category   | Concentration average | Intensity average | Intensity RSD |
|------------|-----------------------|-------------------|---------------|
| 6Li (KED)  | 103.978 %             | 2,847 cps         | 1.0 %         |
| 9Be (KED)  | 100.146 ppb           | 14,965 cps        | 2.5 %         |
| 11B (KED)  | 107.347 ppb           | 8,326 cps         | 0.3 %         |
| 24Mg (KED) | 99.925 ppb            | 55,618 cps        | 1.7 %         |
| 27Al (KED) | 99.453 ppb            | 14,240 cps        | 2.9 %         |

| Category    | Concentration average | Intensity average | Intensity RSD |
|-------------|-----------------------|-------------------|---------------|
| 45Sc (KED)  | 104.985 %             | 52,871 cps        | 2.1 %         |
| 51V (KED)   | 100.144 ppb           | 930,916 cps       | 0.7 %         |
| 52Cr (KED)  | 99.964 ppb            | 1,455,032 cps     | 0.5 %         |
| 55Mn (KED)  | 100.058 ppb           | 715,623 cps       | 1.4 %         |
| 56Fe (KED)  | 99.954 ppb            | 1,306,462 cps     | 1.5 %         |
| 58Ni (KED)  | 99.789 ppb            | 1,667,320 cps     | 0.8 %         |
| 59Co (KED)  | 100.023 ppb           | 2,722,696 cps     | 1.6 %         |
| 63Cu (KED)  | 99.859 ppb            | 2,087,501 cps     | 0.9 %         |
| 64Zn (KED)  | 101.096 ppb           | 554,561 cps       | 1.1 %         |
| 69Ga (KED)  | 100.391 ppb           | 678,965 cps       | 1.9 %         |
| 75As (KED)  | 100.299 ppb           | 155,443 cps       | 2.1 %         |
| 80Se (KED)  | 100.412 ppb           | 47,316 cps        | 2.0 %         |
| 85Rb (KED)  | 100.161 ppb           | 604,333 cps       | 1.3 %         |
| 88Sr (KED)  | 99.650 ppb            | 839,947 cps       | 1.8 %         |
| 89Y (KED)   | 102.766 %             | 457,280 cps       | 0.9 %         |
| 107Ag (KED) | 100.483 ppb           | 5,444,573 cps     | 0.5 %         |
| 114Cd (KED) | 100.148 ppb           | 1,979,237 cps     | 1.4 %         |
| 115In (KED) | 101.139 %             | 811,693 cps       | 0.4 %         |
| 133Cs (KED) | 99.676 ppb            | 2,990,158 cps     | 0.7 %         |
| 138Ba (KED) | 100.195 ppb           | 4,076,990 cps     | 0.9 %         |
| 139La (KED) | 100.571 ppb           | 8,962,627 cps     | 1.6 %         |
| 140Ce (KED) | 100.239 ppb           | 11,790,222 cps    | 0.5 %         |
| 141Pr (KED) | 100.170 ppb           | 12,131,472 cps    | 0.1 %         |
| 142Nd (KED) | 100.405 ppb           | 4,877,908 cps     | 0.8 %         |
| 152Sm (KED) | 100.474 ppb           | 4,292,926 cps     | 2.6 %         |
| 153Eu (KED) | 100.329 ppb           | 8,608,979 cps     | 1.1 %         |
| 158Gd (KED) | 100.408 ppb           | 5,847,585 cps     | 2.0 %         |
| 159Tb (KED) | 101.790 %             | 4,086,964 cps     | 3.6 %         |
| 164Dy (KED) | 100.597 ppb           | 6,403,683 cps     | 1.6 %         |
| 166Er (KED) | 100.641 ppb           | 7,639,121 cps     | 2.6 %         |
| 169Tm (KED) | 99.850 ppb            | 24,450,068 cps    | 1.7 %         |
| 174Yb (KED) | 100.106 ppb           | 8,919,103 cps     | 1.7 %         |
| 175Lu (KED) | 100.154 ppb           | 15,082,049 cps    | 1.1 %         |
| 205Tl (KED) | 100.092 ppb           | 17,389,332 cps    | 1.7 %         |
| 208Pb (KED) | 100.259 ppb           | 12,347,252 cps    | 2.5 %         |
| 209Bi (KED) | 99.674 %              | 3,406,705 cps     | 0.3 %         |
| 232Th (KED) | 100.401 ppb           | 25,623,410 cps    | 1.7 %         |
| 238U (KED)  | 99.949 ppb            | 28,119,408 cps    | 0.6 %         |

## Sample Summary

Instrument ID: iCAP Q

Analysis index: 7

Analysis name: 507403chang jian

Analysis started at: 11/3/2021 2:49:43 PM

User name: WINDOWS-UPCI4ER\Administrator

| Category    | Concentration average | Concentration RSD |
|-------------|-----------------------|-------------------|
| 6Li (KED)   | 106.778 %             | 1.7 %             |
| 9Be (KED)   | 0.087 ppb             | 90.8 %            |
| 11B (KED)   | 3.998 ppb             | 39.8 %            |
| 24Mg (KED)  | 99.614 ppb            | 2.4 %             |
| 27Al (KED)  | 146.877 ppb           | 1.1 %             |
| 45Sc (KED)  | 102.142 %             | 1.0 %             |
| 51V (KED)   | 0.272 ppb             | 6.1 %             |
| 52Cr (KED)  | 1.605 ppb             | 0.8 %             |
| 55Mn (KED)  | 5.626 ppb             | 3.2 %             |
| 56Fe (KED)  | 164.028 ppb           | 1.3 %             |
| 58Ni (KED)  | 0.924 ppb             | 0.3 %             |
| 59Co (KED)  | 0.081 ppb             | 8.1 %             |
| 63Cu (KED)  | 2.406 ppb             | 2.3 %             |
| 64Zn (KED)  | 54.306 ppb            | 1.6 %             |
| 69Ga (KED)  | 0.521 ppb             | 2.0 %             |
| 75As (KED)  | 0.135 ppb             | 23.4 %            |
| 80Se (KED)  | -0.359 ppb            | 19.6 %            |
| 85Rb (KED)  | 0.450 ppb             | 3.3 %             |
| 88Sr (KED)  | 1.277 ppb             | 2.1 %             |
| 89Y (KED)   | 101.860 %             | 1.7 %             |
| 107Ag (KED) | 0.076 ppb             | 12.4 %            |
| 114Cd (KED) | 0.009 ppb             | 20.2 %            |
| 115In (KED) | 98.748 %              | 0.7 %             |
| 133Cs (KED) | 0.032 ppb             | 16.0 %            |
| 138Ba (KED) | 1.609 ppb             | 4.1 %             |
| 139La (KED) | 0.153 ppb             | 5.1 %             |
| 140Ce (KED) | 0.333 ppb             | 2.4 %             |
| 141Pr (KED) | 0.037 ppb             | 7.6 %             |
| 142Nd (KED) | 0.207 ppb             | 9.1 %             |
| 152Sm (KED) | 0.028 ppb             | 11.7 %            |
| 153Eu (KED) | 0.007 ppb             | 24.5 %            |
| 158Gd (KED) | 0.024 ppb             | 15.7 %            |
| 159Tb (KED) | 103.554 %             | 3.4 %             |
| 164Dy (KED) | 0.018 ppb             | 12.6 %            |
| 166Er (KED) | 0.010 ppb             | 18.0 %            |
| 169Tm (KED) | 0.003 ppb             | 44.7 %            |
| 174Yb (KED) | 0.009 ppb             | 20.5 %            |
| 175Lu (KED) | -0.003 ppb            | 299.9 %           |
| 205Tl (KED) | 0.009 ppb             | 12.8 %            |
| 208Pb (KED) | 0.353 ppb             | 3.0 %             |
| 209Bi (KED) | 96.004 %              | 2.5 %             |
| 232Th (KED) | 0.184 ppb             | 47.3 %            |
| 238U (KED)  | 0.015 ppb             | 16.3 %            |

| Category   | Concentration average | Intensity average | Intensity RSD |
|------------|-----------------------|-------------------|---------------|
| 6Li (KED)  | 106.778 %             | 2,924 cps         | 1.7 %         |
| 9Be (KED)  | 0.087 ppb             | 13 cps            | 90.1 %        |
| 11B (KED)  | 3.998 ppb             | 1,955 cps         | 6.1 %         |
| 24Mg (KED) | 99.614 ppb            | 56,934 cps        | 1.2 %         |
| 27Al (KED) | 146.877 ppb           | 20,317 cps        | 0.2 %         |

| Category    | Concentration average | Intensity average | Intensity RSD |
|-------------|-----------------------|-------------------|---------------|
| 45Sc (KED)  | 102.142 %             | 51,439 cps        | 1.0 %         |
| 51V (KED)   | 0.272 ppb             | 2,467 cps         | 5.8 %         |
| 52Cr (KED)  | 1.605 ppb             | 22,849 cps        | 0.9 %         |
| 55Mn (KED)  | 5.626 ppb             | 39,245 cps        | 2.2 %         |
| 56Fe (KED)  | 164.028 ppb           | 2,083,440 cps     | 0.3 %         |
| 58Ni (KED)  | 0.924 ppb             | 15,339 cps        | 0.9 %         |
| 59Co (KED)  | 0.081 ppb             | 2,199 cps         | 7.1 %         |
| 63Cu (KED)  | 2.406 ppb             | 50,830 cps        | 0.6 %         |
| 64Zn (KED)  | 54.306 ppb            | 300,804 cps       | 0.6 %         |
| 69Ga (KED)  | 0.521 ppb             | 3,668 cps         | 0.3 %         |
| 75As (KED)  | 0.135 ppb             | 218 cps           | 21.4 %        |
| 80Se (KED)  | -0.359 ppb            | 1,293 cps         | 0.8 %         |
| 85Rb (KED)  | 0.450 ppb             | 2,713 cps         | 3.0 %         |
| 88Sr (KED)  | 1.277 ppb             | 10,878 cps        | 1.0 %         |
| 89Y (KED)   | 101.860 %             | 453,248 cps       | 1.7 %         |
| 107Ag (KED) | 0.076 ppb             | 4,062 cps         | 11.7 %        |
| 114Cd (KED) | 0.009 ppb             | 220 cps           | 16.0 %        |
| 115In (KED) | 98.748 %              | 792,501 cps       | 0.7 %         |
| 133Cs (KED) | 0.032 ppb             | 957 cps           | 14.8 %        |
| 138Ba (KED) | 1.609 ppb             | 70,251 cps        | 1.6 %         |
| 139La (KED) | 0.153 ppb             | 13,956 cps        | 1.8 %         |
| 140Ce (KED) | 0.333 ppb             | 41,099 cps        | 1.4 %         |
| 141Pr (KED) | 0.037 ppb             | 4,565 cps         | 4.6 %         |
| 142Nd (KED) | 0.207 ppb             | 10,502 cps        | 5.9 %         |
| 152Sm (KED) | 0.028 ppb             | 1,202 cps         | 8.5 %         |
| 153Eu (KED) | 0.007 ppb             | 662 cps           | 21.2 %        |
| 158Gd (KED) | 0.024 ppb             | 1,459 cps         | 13.1 %        |
| 159Tb (KED) | 103.554 %             | 4,157,763 cps     | 3.4 %         |
| 164Dy (KED) | 0.018 ppb             | 1,177 cps         | 9.1 %         |
| 166Er (KED) | 0.010 ppb             | 1,124 cps         | 9.7 %         |
| 169Tm (KED) | 0.003 ppb             | 801 cps           | 41.4 %        |
| 174Yb (KED) | 0.009 ppb             | 849 cps           | 16.7 %        |
| 175Lu (KED) | -0.003 ppb            | 15,196 cps        | 4.7 %         |
| 205Tl (KED) | 0.009 ppb             | 1,596 cps         | 13.1 %        |
| 208Pb (KED) | 0.353 ppb             | 51,205 cps        | 1.7 %         |
| 209Bi (KED) | 96.004 %              | 3,281,283 cps     | 2.5 %         |
| 232Th (KED) | 0.184 ppb             | 45,619 cps        | 48.6 %        |
| 238U (KED)  | 0.015 ppb             | 4,330 cps         | 16.3 %        |

## Sample Summary

Instrument ID: iCAP Q

Analysis index: 8

Analysis name: 804025duan jian

Analysis started at: 11/3/2021 2:53:12 PM

User name: WINDOWS-UPCI4ER\Administrator

| Category    | Concentration average | Concentration RSD |
|-------------|-----------------------|-------------------|
| 6Li (KED)   | 106.616 %             | 2.9 %             |
| 9Be (KED)   | 0.043 ppb             | 47.8 %            |
| 11B (KED)   | -13.390 ppb           | 4.5 %             |
| 24Mg (KED)  | 121.144 ppb           | 2.2 %             |
| 27Al (KED)  | 229.863 ppb           | 1.1 %             |
| 45Sc (KED)  | 101.360 %             | 2.2 %             |
| 51V (KED)   | 0.414 ppb             | 2.5 %             |
| 52Cr (KED)  | 1.176 ppb             | 2.7 %             |
| 55Mn (KED)  | 7.003 ppb             | 2.2 %             |
| 56Fe (KED)  | 218.464 ppb           | 1.9 %             |
| 58Ni (KED)  | 1.351 ppb             | 3.3 %             |
| 59Co (KED)  | 0.109 ppb             | 3.6 %             |
| 63Cu (KED)  | 2.544 ppb             | 2.0 %             |
| 64Zn (KED)  | 50.574 ppb            | 3.1 %             |
| 69Ga (KED)  | 0.764 ppb             | 1.9 %             |
| 75As (KED)  | 0.155 ppb             | 16.0 %            |
| 80Se (KED)  | -0.297 ppb            | 26.3 %            |
| 85Rb (KED)  | 0.588 ppb             | 2.4 %             |
| 88Sr (KED)  | 1.703 ppb             | 1.2 %             |
| 89Y (KED)   | 99.848 %              | 2.0 %             |
| 107Ag (KED) | 0.119 ppb             | 24.2 %            |
| 114Cd (KED) | 0.027 ppb             | 76.5 %            |
| 115In (KED) | 96.905 %              | 1.4 %             |
| 133Cs (KED) | 0.054 ppb             | 32.3 %            |
| 138Ba (KED) | 2.446 ppb             | 0.8 %             |
| 139La (KED) | 0.230 ppb             | 1.7 %             |
| 140Ce (KED) | 0.447 ppb             | 1.3 %             |
| 141Pr (KED) | 0.054 ppb             | 14.3 %            |
| 142Nd (KED) | 0.273 ppb             | 2.2 %             |
| 152Sm (KED) | 0.038 ppb             | 14.7 %            |
| 153Eu (KED) | 0.010 ppb             | 46.7 %            |
| 158Gd (KED) | 0.032 ppb             | 12.0 %            |
| 159Tb (KED) | 100.302 %             | 1.8 %             |
| 164Dy (KED) | 0.023 ppb             | 14.6 %            |
| 166Er (KED) | 0.010 ppb             | 23.9 %            |
| 169Tm (KED) | 0.003 ppb             | 67.6 %            |
| 174Yb (KED) | 0.009 ppb             | 22.0 %            |
| 175Lu (KED) | -0.005 ppb            | 114.5 %           |
| 205Tl (KED) | 0.007 ppb             | 22.8 %            |
| 208Pb (KED) | 0.392 ppb             | 3.8 %             |
| 209Bi (KED) | 97.344 %              | 0.9 %             |
| 232Th (KED) | 0.076 ppb             | 5.1 %             |
| 238U (KED)  | 0.014 ppb             | 5.4 %             |

| Category   | Concentration average | Intensity average | Intensity RSD |
|------------|-----------------------|-------------------|---------------|
| 6Li (KED)  | 106.616 %             | 2,919 cps         | 2.9 %         |
| 9Be (KED)  | 0.043 ppb             | 7 cps             | 50.0 %        |
| 11B (KED)  | -13.390 ppb           | 843 cps           | 6.6 %         |
| 24Mg (KED) | 121.144 ppb           | 69,056 cps        | 0.8 %         |
| 27Al (KED) | 229.863 ppb           | 31,372 cps        | 1.2 %         |

| Category    | Concentration average | Intensity average | Intensity RSD |
|-------------|-----------------------|-------------------|---------------|
| 45Sc (KED)  | 101.360 %             | 51,045 cps        | 2.2 %         |
| 51V (KED)   | 0.414 ppb             | 3,726 cps         | 0.4 %         |
| 52Cr (KED)  | 1.176 ppb             | 16,637 cps        | 1.3 %         |
| 55Mn (KED)  | 7.003 ppb             | 48,449 cps        | 0.4 %         |
| 56Fe (KED)  | 218.464 ppb           | 2,751,529 cps     | 0.3 %         |
| 58Ni (KED)  | 1.351 ppb             | 22,096 cps        | 1.3 %         |
| 59Co (KED)  | 0.109 ppb             | 2,907 cps         | 2.6 %         |
| 63Cu (KED)  | 2.544 ppb             | 52,637 cps        | 1.5 %         |
| 64Zn (KED)  | 50.574 ppb            | 275,349 cps       | 1.0 %         |
| 69Ga (KED)  | 0.764 ppb             | 5,190 cps         | 0.3 %         |
| 75As (KED)  | 0.155 ppb             | 244 cps           | 13.7 %        |
| 80Se (KED)  | -0.297 ppb            | 1,296 cps         | 1.6 %         |
| 85Rb (KED)  | 0.588 ppb             | 3,470 cps         | 3.3 %         |
| 88Sr (KED)  | 1.703 ppb             | 14,149 cps        | 1.2 %         |
| 89Y (KED)   | 99.848 %              | 444,296 cps       | 2.0 %         |
| 107Ag (KED) | 0.119 ppb             | 6,189 cps         | 22.7 %        |
| 114Cd (KED) | 0.027 ppb             | 551 cps           | 69.1 %        |
| 115In (KED) | 96.905 %              | 777,713 cps       | 1.4 %         |
| 133Cs (KED) | 0.054 ppb             | 1,592 cps         | 30.4 %        |
| 138Ba (KED) | 2.446 ppb             | 101,625 cps       | 1.2 %         |
| 139La (KED) | 0.230 ppb             | 20,267 cps        | 3.1 %         |
| 140Ce (KED) | 0.447 ppb             | 53,101 cps        | 2.6 %         |
| 141Pr (KED) | 0.054 ppb             | 6,495 cps         | 15.5 %        |
| 142Nd (KED) | 0.273 ppb             | 13,347 cps        | 1.5 %         |
| 152Sm (KED) | 0.038 ppb             | 1,616 cps         | 16.0 %        |
| 153Eu (KED) | 0.010 ppb             | 857 cps           | 47.7 %        |
| 158Gd (KED) | 0.032 ppb             | 1,868 cps         | 13.6 %        |
| 159Tb (KED) | 100.302 %             | 4,027,204 cps     | 1.8 %         |
| 164Dy (KED) | 0.023 ppb             | 1,458 cps         | 16.0 %        |
| 166Er (KED) | 0.010 ppb             | 1,081 cps         | 17.6 %        |
| 169Tm (KED) | 0.003 ppb             | 768 cps           | 68.3 %        |
| 174Yb (KED) | 0.009 ppb             | 817 cps           | 22.7 %        |
| 175Lu (KED) | -0.005 ppb            | 14,434 cps        | 4.7 %         |
| 205Tl (KED) | 0.007 ppb             | 1,265 cps         | 22.5 %        |
| 208Pb (KED) | 0.392 ppb             | 56,677 cps        | 2.4 %         |
| 209Bi (KED) | 97.344 %              | 3,327,098 cps     | 0.9 %         |
| 232Th (KED) | 0.076 ppb             | 19,264 cps        | 4.9 %         |
| 238U (KED)  | 0.014 ppb             | 3,972 cps         | 5.4 %         |

## Sample Summary

Instrument ID: iCAP Q

Analysis index: 9

Analysis name: 80108

Analysis started at: 11/3/2021 2:56:25 PM

User name: WINDOWS-UPCI4ER\Administrator

| Category    | Concentration average | Concentration RSD |
|-------------|-----------------------|-------------------|
| 6Li (KED)   | 109.660 %             | 2.8 %             |
| 9Be (KED)   | 0.035 ppb             | 90.4 %            |
| 11B (KED)   | 9.061 ppb             | 17.6 %            |
| 24Mg (KED)  | 63.269 ppb            | 1.7 %             |
| 27Al (KED)  | 74.551 ppb            | 0.6 %             |
| 45Sc (KED)  | 101.048 %             | 1.4 %             |
| 51V (KED)   | 0.145 ppb             | 5.7 %             |
| 52Cr (KED)  | 1.200 ppb             | 1.7 %             |
| 55Mn (KED)  | 1.886 ppb             | 2.3 %             |
| 56Fe (KED)  | 90.964 ppb            | 0.5 %             |
| 58Ni (KED)  | 0.557 ppb             | 3.3 %             |
| 59Co (KED)  | 0.044 ppb             | 6.6 %             |
| 63Cu (KED)  | 2.174 ppb             | 3.7 %             |
| 64Zn (KED)  | 51.380 ppb            | 2.5 %             |
| 69Ga (KED)  | 0.376 ppb             | 5.7 %             |
| 75As (KED)  | 0.155 ppb             | 14.3 %            |
| 80Se (KED)  | -0.429 ppb            | 56.5 %            |
| 85Rb (KED)  | 1.089 ppb             | 0.8 %             |
| 88Sr (KED)  | 1.079 ppb             | 1.4 %             |
| 89Y (KED)   | 98.683 %              | 1.1 %             |
| 107Ag (KED) | 0.018 ppb             | 9.1 %             |
| 114Cd (KED) | 0.003 ppb             | 24.6 %            |
| 115In (KED) | 95.781 %              | 2.7 %             |
| 133Cs (KED) | 0.021 ppb             | 10.6 %            |
| 138Ba (KED) | 1.133 ppb             | 0.6 %             |
| 139La (KED) | 0.068 ppb             | 2.4 %             |
| 140Ce (KED) | 0.154 ppb             | 4.1 %             |
| 141Pr (KED) | 0.016 ppb             | 3.7 %             |
| 142Nd (KED) | 0.092 ppb             | 6.5 %             |
| 152Sm (KED) | 0.012 ppb             | 5.5 %             |
| 153Eu (KED) | 0.002 ppb             | 15.5 %            |
| 158Gd (KED) | 0.010 ppb             | 7.5 %             |
| 159Tb (KED) | 100.776 %             | 1.7 %             |
| 164Dy (KED) | 0.009 ppb             | 9.5 %             |
| 166Er (KED) | 0.003 ppb             | 21.8 %            |
| 169Tm (KED) | 0.001 ppb             | 13.7 %            |
| 174Yb (KED) | 0.004 ppb             | 10.0 %            |
| 175Lu (KED) | -0.008 ppb            | 34.6 %            |
| 205Tl (KED) | 0.003 ppb             | 9.3 %             |
| 208Pb (KED) | 0.139 ppb             | 4.5 %             |
| 209Bi (KED) | 96.628 %              | 0.9 %             |
| 232Th (KED) | 0.028 ppb             | 3.8 %             |
| 238U (KED)  | 0.006 ppb             | 9.3 %             |

| Category   | Concentration average | Intensity average | Intensity RSD |
|------------|-----------------------|-------------------|---------------|
| 6Li (KED)  | 109.660 %             | 3,003 cps         | 2.8 %         |
| 9Be (KED)  | 0.035 ppb             | 6 cps             | 91.7 %        |
| 11B (KED)  | 9.061 ppb             | 2,337 cps         | 1.8 %         |
| 24Mg (KED) | 63.269 ppb            | 37,252 cps        | 2.1 %         |
| 27Al (KED) | 74.551 ppb            | 10,357 cps        | 0.8 %         |

| Category    | Concentration average | Intensity average | Intensity RSD |
|-------------|-----------------------|-------------------|---------------|
| 45Sc (KED)  | 101.048 %             | 50,888 cps        | 1.4 %         |
| 51V (KED)   | 0.145 ppb             | 1,306 cps         | 5.0 %         |
| 52Cr (KED)  | 1.200 ppb             | 16,930 cps        | 0.4 %         |
| 55Mn (KED)  | 1.886 ppb             | 13,079 cps        | 1.1 %         |
| 56Fe (KED)  | 90.964 ppb            | 1,145,220 cps     | 1.6 %         |
| 58Ni (KED)  | 0.557 ppb             | 9,271 cps         | 1.9 %         |
| 59Co (KED)  | 0.044 ppb             | 1,207 cps         | 5.0 %         |
| 63Cu (KED)  | 2.174 ppb             | 44,585 cps        | 3.0 %         |
| 64Zn (KED)  | 51.380 ppb            | 276,356 cps       | 1.6 %         |
| 69Ga (KED)  | 0.376 ppb             | 2,608 cps         | 4.3 %         |
| 75As (KED)  | 0.155 ppb             | 241 cps           | 14.5 %        |
| 80Se (KED)  | -0.429 ppb            | 1,223 cps         | 9.3 %         |
| 85Rb (KED)  | 1.089 ppb             | 6,327 cps         | 0.4 %         |
| 88Sr (KED)  | 1.079 ppb             | 8,939 cps         | 0.5 %         |
| 89Y (KED)   | 98.683 %              | 439,113 cps       | 1.1 %         |
| 107Ag (KED) | 0.018 ppb             | 943 cps           | 7.7 %         |
| 114Cd (KED) | 0.003 ppb             | 109 cps           | 17.4 %        |
| 115In (KED) | 95.781 %              | 768,692 cps       | 2.7 %         |
| 133Cs (KED) | 0.021 ppb             | 620 cps           | 11.7 %        |
| 138Ba (KED) | 1.133 ppb             | 49,238 cps        | 1.6 %         |
| 139La (KED) | 0.068 ppb             | 6,122 cps         | 2.9 %         |
| 140Ce (KED) | 0.154 ppb             | 19,175 cps        | 4.2 %         |
| 141Pr (KED) | 0.016 ppb             | 1,930 cps         | 2.3 %         |
| 142Nd (KED) | 0.092 ppb             | 4,672 cps         | 7.4 %         |
| 152Sm (KED) | 0.012 ppb             | 497 cps           | 4.1 %         |
| 153Eu (KED) | 0.002 ppb             | 221 cps           | 15.3 %        |
| 158Gd (KED) | 0.010 ppb             | 598 cps           | 9.0 %         |
| 159Tb (KED) | 100.776 %             | 4,046,237 cps     | 1.7 %         |
| 164Dy (KED) | 0.009 ppb             | 594 cps           | 8.3 %         |
| 166Er (KED) | 0.003 ppb             | 597 cps           | 9.4 %         |
| 169Tm (KED) | 0.001 ppb             | 178 cps           | 11.5 %        |
| 174Yb (KED) | 0.004 ppb             | 349 cps           | 10.7 %        |
| 175Lu (KED) | -0.008 ppb            | 14,072 cps        | 3.0 %         |
| 205Tl (KED) | 0.003 ppb             | 627 cps           | 7.9 %         |
| 208Pb (KED) | 0.139 ppb             | 26,032 cps        | 3.6 %         |
| 209Bi (KED) | 96.628 %              | 3,302,621 cps     | 0.9 %         |
| 232Th (KED) | 0.028 ppb             | 7,202 cps         | 2.8 %         |
| 238U (KED)  | 0.006 ppb             | 1,842 cps         | 7.6 %         |

## Sample Summary

Instrument ID: iCAP Q

Analysis index: 10

Analysis name: 853003chang jian

Analysis started at: 11/3/2021 2:59:37 PM

User name: WINDOWS-UPCI4ER\Administrator

| Category    | Concentration average | Concentration RSD |
|-------------|-----------------------|-------------------|
| 6Li (KED)   | 111.000 %             | 3.8 %             |
| 9Be (KED)   | 0.028 ppb             | 117.0 %           |
| 11B (KED)   | -17.279 ppb           | 6.1 %             |
| 24Mg (KED)  | 111.012 ppb           | 4.7 %             |
| 27Al (KED)  | 205.471 ppb           | 1.3 %             |
| 45Sc (KED)  | 104.276 %             | 1.4 %             |
| 51V (KED)   | 0.379 ppb             | 6.6 %             |
| 52Cr (KED)  | 0.725 ppb             | 4.5 %             |
| 55Mn (KED)  | 6.728 ppb             | 0.6 %             |
| 56Fe (KED)  | 191.328 ppb           | 1.4 %             |
| 58Ni (KED)  | 1.159 ppb             | 2.3 %             |
| 59Co (KED)  | 0.106 ppb             | 6.1 %             |
| 63Cu (KED)  | 2.299 ppb             | 1.5 %             |
| 64Zn (KED)  | 48.364 ppb            | 1.0 %             |
| 69Ga (KED)  | 0.769 ppb             | 3.1 %             |
| 75As (KED)  | 0.174 ppb             | 17.4 %            |
| 80Se (KED)  | -0.083 ppb            | 310.8 %           |
| 85Rb (KED)  | 0.500 ppb             | 4.1 %             |
| 88Sr (KED)  | 1.813 ppb             | 2.4 %             |
| 89Y (KED)   | 99.812 %              | 2.2 %             |
| 107Ag (KED) | 0.010 ppb             | 6.0 %             |
| 114Cd (KED) | 0.013 ppb             | 4.6 %             |
| 115In (KED) | 97.124 %              | 0.8 %             |
| 133Cs (KED) | 0.039 ppb             | 8.8 %             |
| 138Ba (KED) | 2.383 ppb             | 2.8 %             |
| 139La (KED) | 0.191 ppb             | 3.9 %             |
| 140Ce (KED) | 0.379 ppb             | 2.6 %             |
| 141Pr (KED) | 0.044 ppb             | 7.6 %             |
| 142Nd (KED) | 0.242 ppb             | 2.9 %             |
| 152Sm (KED) | 0.032 ppb             | 5.7 %             |
| 153Eu (KED) | 0.006 ppb             | 10.0 %            |
| 158Gd (KED) | 0.028 ppb             | 10.6 %            |
| 159Tb (KED) | 102.669 %             | 2.1 %             |
| 164Dy (KED) | 0.020 ppb             | 11.0 %            |
| 166Er (KED) | 0.008 ppb             | 11.6 %            |
| 169Tm (KED) | 0.001 ppb             | 5.9 %             |
| 174Yb (KED) | 0.008 ppb             | 4.5 %             |
| 175Lu (KED) | -0.007 ppb            | 80.9 %            |
| 205Tl (KED) | 0.006 ppb             | 2.8 %             |
| 208Pb (KED) | 0.348 ppb             | 4.3 %             |
| 209Bi (KED) | 96.687 %              | 1.4 %             |
| 232Th (KED) | 0.059 ppb             | 2.0 %             |
| 238U (KED)  | 0.012 ppb             | 2.7 %             |

| Category   | Concentration average | Intensity average | Intensity RSD |
|------------|-----------------------|-------------------|---------------|
| 6Li (KED)  | 111.000 %             | 3,039 cps         | 3.8 %         |
| 9Be (KED)  | 0.028 ppb             | 4 cps             | 114.6 %       |
| 11B (KED)  | -17.279 ppb           | 618 cps           | 7.8 %         |
| 24Mg (KED) | 111.012 ppb           | 65,863 cps        | 1.7 %         |
| 27Al (KED) | 205.471 ppb           | 28,885 cps        | 0.2 %         |

| Category    | Concentration average | Intensity average | Intensity RSD |
|-------------|-----------------------|-------------------|---------------|
| 45Sc (KED)  | 104.276 %             | 52,514 cps        | 1.4 %         |
| 51V (KED)   | 0.379 ppb             | 3,513 cps         | 5.6 %         |
| 52Cr (KED)  | 0.725 ppb             | 10,593 cps        | 4.1 %         |
| 55Mn (KED)  | 6.728 ppb             | 47,902 cps        | 1.5 %         |
| 56Fe (KED)  | 191.328 ppb           | 2,480,213 cps     | 1.4 %         |
| 58Ni (KED)  | 1.159 ppb             | 19,563 cps        | 0.9 %         |
| 59Co (KED)  | 0.106 ppb             | 2,906 cps         | 6.1 %         |
| 63Cu (KED)  | 2.299 ppb             | 47,651 cps        | 2.7 %         |
| 64Zn (KED)  | 48.364 ppb            | 263,802 cps       | 1.3 %         |
| 69Ga (KED)  | 0.769 ppb             | 5,222 cps         | 4.3 %         |
| 75As (KED)  | 0.174 ppb             | 272 cps           | 14.3 %        |
| 80Se (KED)  | -0.083 ppb            | 1,389 cps         | 6.9 %         |
| 85Rb (KED)  | 0.500 ppb             | 2,949 cps         | 2.2 %         |
| 88Sr (KED)  | 1.813 ppb             | 15,042 cps        | 0.5 %         |
| 89Y (KED)   | 99.812 %              | 444,135 cps       | 2.2 %         |
| 107Ag (KED) | 0.010 ppb             | 574 cps           | 4.9 %         |
| 114Cd (KED) | 0.013 ppb             | 283 cps           | 4.7 %         |
| 115In (KED) | 97.124 %              | 779,468 cps       | 0.8 %         |
| 133Cs (KED) | 0.039 ppb             | 1,154 cps         | 8.6 %         |
| 138Ba (KED) | 2.383 ppb             | 101,427 cps       | 1.3 %         |
| 139La (KED) | 0.191 ppb             | 17,259 cps        | 2.2 %         |
| 140Ce (KED) | 0.379 ppb             | 46,275 cps        | 1.0 %         |
| 141Pr (KED) | 0.044 ppb             | 5,462 cps         | 5.6 %         |
| 142Nd (KED) | 0.242 ppb             | 12,145 cps        | 1.0 %         |
| 152Sm (KED) | 0.032 ppb             | 1,378 cps         | 5.3 %         |
| 153Eu (KED) | 0.006 ppb             | 556 cps           | 11.9 %        |
| 158Gd (KED) | 0.028 ppb             | 1,679 cps         | 8.7 %         |
| 159Tb (KED) | 102.669 %             | 4,122,243 cps     | 2.1 %         |
| 164Dy (KED) | 0.020 ppb             | 1,341 cps         | 8.8 %         |
| 166Er (KED) | 0.008 ppb             | 1,004 cps         | 6.1 %         |
| 169Tm (KED) | 0.001 ppb             | 359 cps           | 7.2 %         |
| 174Yb (KED) | 0.008 ppb             | 783 cps           | 3.3 %         |
| 175Lu (KED) | -0.007 ppb            | 14,431 cps        | 4.5 %         |
| 205Tl (KED) | 0.006 ppb             | 1,010 cps         | 4.0 %         |
| 208Pb (KED) | 0.348 ppb             | 51,013 cps        | 2.7 %         |
| 209Bi (KED) | 96.687 %              | 3,304,616 cps     | 1.4 %         |
| 232Th (KED) | 0.059 ppb             | 14,913 cps        | 0.9 %         |
| 238U (KED)  | 0.012 ppb             | 3,555 cps         | 1.7 %         |

## Sample Summary

Instrument ID: iCAP Q

Analysis index: 11

Analysis name: 501281duan jian

Analysis started at: 11/3/2021 3:02:47 PM

User name: WINDOWS-UPCI4ER\Administrator

| Category    | Concentration average | Concentration RSD |
|-------------|-----------------------|-------------------|
| 6Li (KED)   | 108.321 %             | 1.2 %             |
| 9Be (KED)   | 0.029 ppb             | 86.6 %            |
| 11B (KED)   | 24.277 ppb            | 22.2 %            |
| 24Mg (KED)  | 58.100 ppb            | 2.7 %             |
| 27Al (KED)  | 91.339 ppb            | 0.4 %             |
| 45Sc (KED)  | 101.110 %             | 1.1 %             |
| 51V (KED)   | 0.160 ppb             | 5.9 %             |
| 52Cr (KED)  | 0.644 ppb             | 1.9 %             |
| 55Mn (KED)  | 3.474 ppb             | 1.0 %             |
| 56Fe (KED)  | 95.894 ppb            | 1.0 %             |
| 58Ni (KED)  | 0.550 ppb             | 3.7 %             |
| 59Co (KED)  | 0.052 ppb             | 5.3 %             |
| 63Cu (KED)  | 1.863 ppb             | 1.4 %             |
| 64Zn (KED)  | 49.490 ppb            | 0.5 %             |
| 69Ga (KED)  | 0.346 ppb             | 1.6 %             |
| 75As (KED)  | 0.170 ppb             | 7.4 %             |
| 80Se (KED)  | -0.298 ppb            | 70.0 %            |
| 85Rb (KED)  | 0.200 ppb             | 3.5 %             |
| 88Sr (KED)  | 0.832 ppb             | 3.8 %             |
| 89Y (KED)   | 97.222 %              | 0.5 %             |
| 107Ag (KED) | 0.036 ppb             | 7.3 %             |
| 114Cd (KED) | 0.007 ppb             | 19.3 %            |
| 115In (KED) | 96.070 %              | 0.6 %             |
| 133Cs (KED) | 0.017 ppb             | 12.6 %            |
| 138Ba (KED) | 1.102 ppb             | 1.8 %             |
| 139La (KED) | 0.084 ppb             | 1.0 %             |
| 140Ce (KED) | 0.188 ppb             | 4.4 %             |
| 141Pr (KED) | 0.019 ppb             | 5.6 %             |
| 142Nd (KED) | 0.108 ppb             | 1.9 %             |
| 152Sm (KED) | 0.014 ppb             | 3.7 %             |
| 153Eu (KED) | 0.003 ppb             | 2.8 %             |
| 158Gd (KED) | 0.012 ppb             | 3.6 %             |
| 159Tb (KED) | 96.708 %              | 1.0 %             |
| 164Dy (KED) | 0.009 ppb             | 14.1 %            |
| 166Er (KED) | 0.003 ppb             | 12.8 %            |
| 169Tm (KED) | 0.001 ppb             | 10.6 %            |
| 174Yb (KED) | 0.003 ppb             | 14.2 %            |
| 175Lu (KED) | -0.008 ppb            | 53.6 %            |
| 205Tl (KED) | 0.003 ppb             | 2.0 %             |
| 208Pb (KED) | 0.244 ppb             | 0.8 %             |
| 209Bi (KED) | 95.133 %              | 0.3 %             |
| 232Th (KED) | 0.029 ppb             | 3.8 %             |
| 238U (KED)  | 0.007 ppb             | 1.8 %             |

| Category   | Concentration average | Intensity average | Intensity RSD |
|------------|-----------------------|-------------------|---------------|
| 6Li (KED)  | 108.321 %             | 2,966 cps         | 1.2 %         |
| 9Be (KED)  | 0.029 ppb             | 4 cps             | 86.6 %        |
| 11B (KED)  | 24.277 ppb            | 3,293 cps         | 9.4 %         |
| 24Mg (KED) | 58.100 ppb            | 33,817 cps        | 1.7 %         |
| 27Al (KED) | 91.339 ppb            | 12,626 cps        | 1.3 %         |

| Category    | Concentration average | Intensity average | Intensity RSD |
|-------------|-----------------------|-------------------|---------------|
| 45Sc (KED)  | 101.110 %             | 50,919 cps        | 1.1 %         |
| 51V (KED)   | 0.160 ppb             | 1,441 cps         | 5.0 %         |
| 52Cr (KED)  | 0.644 ppb             | 9,139 cps         | 2.1 %         |
| 55Mn (KED)  | 3.474 ppb             | 24,029 cps        | 0.5 %         |
| 56Fe (KED)  | 95.894 ppb            | 1,207,809 cps     | 1.8 %         |
| 58Ni (KED)  | 0.550 ppb             | 9,170 cps         | 3.2 %         |
| 59Co (KED)  | 0.052 ppb             | 1,393 cps         | 4.6 %         |
| 63Cu (KED)  | 1.863 ppb             | 37,783 cps        | 0.9 %         |
| 64Zn (KED)  | 49.490 ppb            | 262,707 cps       | 0.6 %         |
| 69Ga (KED)  | 0.346 ppb             | 2,379 cps         | 1.9 %         |
| 75As (KED)  | 0.170 ppb             | 260 cps           | 6.8 %         |
| 80Se (KED)  | -0.298 ppb            | 1,261 cps         | 6.7 %         |
| 85Rb (KED)  | 0.200 ppb             | 1,162 cps         | 3.0 %         |
| 88Sr (KED)  | 0.832 ppb             | 6,840 cps         | 3.7 %         |
| 89Y (KED)   | 97.222 %              | 432,610 cps       | 0.5 %         |
| 107Ag (KED) | 0.036 ppb             | 1,906 cps         | 7.7 %         |
| 114Cd (KED) | 0.007 ppb             | 179 cps           | 14.0 %        |
| 115In (KED) | 96.070 %              | 771,008 cps       | 0.6 %         |
| 133Cs (KED) | 0.017 ppb             | 506 cps           | 11.1 %        |
| 138Ba (KED) | 1.102 ppb             | 46,045 cps        | 0.7 %         |
| 139La (KED) | 0.084 ppb             | 7,237 cps         | 0.1 %         |
| 140Ce (KED) | 0.188 ppb             | 22,261 cps        | 3.4 %         |
| 141Pr (KED) | 0.019 ppb             | 2,284 cps         | 4.6 %         |
| 142Nd (KED) | 0.108 ppb             | 5,229 cps         | 2.7 %         |
| 152Sm (KED) | 0.014 ppb             | 568 cps           | 4.6 %         |
| 153Eu (KED) | 0.003 ppb             | 284 cps           | 1.8 %         |
| 158Gd (KED) | 0.012 ppb             | 668 cps           | 4.3 %         |
| 159Tb (KED) | 96.708 %              | 3,882,893 cps     | 1.0 %         |
| 164Dy (KED) | 0.009 ppb             | 582 cps           | 13.2 %        |
| 166Er (KED) | 0.003 ppb             | 536 cps           | 3.6 %         |
| 169Tm (KED) | 0.001 ppb             | 152 cps           | 9.1 %         |
| 174Yb (KED) | 0.003 ppb             | 313 cps           | 12.1 %        |
| 175Lu (KED) | -0.008 ppb            | 13,512 cps        | 3.3 %         |
| 205Tl (KED) | 0.003 ppb             | 581 cps           | 1.8 %         |
| 208Pb (KED) | 0.244 ppb             | 38,027 cps        | 0.5 %         |
| 209Bi (KED) | 95.133 %              | 3,251,512 cps     | 0.3 %         |
| 232Th (KED) | 0.029 ppb             | 7,342 cps         | 3.4 %         |
| 238U (KED)  | 0.007 ppb             | 2,112 cps         | 1.7 %         |

## Sample Summary

Instrument ID: iCAP Q

Analysis index: 12

Analysis name: 714061duan jian

Analysis started at: 11/3/2021 3:05:58 PM

User name: WINDOWS-UPCI4ER\Administrator

| Category    | Concentration average | Concentration RSD |
|-------------|-----------------------|-------------------|
| 6Li (KED)   | 108.077 %             | 5.7 %             |
| 9Be (KED)   | 0.000 ppb             |                   |
| 11B (KED)   | 14.756 ppb            | 10.2 %            |
| 24Mg (KED)  | 55.368 ppb            | 6.9 %             |
| 27Al (KED)  | 86.571 ppb            | 2.2 %             |
| 45Sc (KED)  | 103.635 %             | 0.3 %             |
| 51V (KED)   | 0.164 ppb             | 1.1 %             |
| 52Cr (KED)  | 0.513 ppb             | 3.5 %             |
| 55Mn (KED)  | 3.173 ppb             | 1.2 %             |
| 56Fe (KED)  | 87.546 ppb            | 0.5 %             |
| 58Ni (KED)  | 0.563 ppb             | 0.5 %             |
| 59Co (KED)  | 0.051 ppb             | 0.6 %             |
| 63Cu (KED)  | 2.061 ppb             | 2.2 %             |
| 64Zn (KED)  | 51.037 ppb            | 2.1 %             |
| 69Ga (KED)  | 0.318 ppb             | 6.7 %             |
| 75As (KED)  | 0.109 ppb             | 18.5 %            |
| 80Se (KED)  | -0.270 ppb            | 41.3 %            |
| 85Rb (KED)  | 0.251 ppb             | 1.5 %             |
| 88Sr (KED)  | 0.797 ppb             | 2.5 %             |
| 89Y (KED)   | 98.185 %              | 0.9 %             |
| 107Ag (KED) | 0.019 ppb             | 12.6 %            |
| 114Cd (KED) | 0.008 ppb             | 15.1 %            |
| 115In (KED) | 94.425 %              | 1.8 %             |
| 133Cs (KED) | 0.018 ppb             | 6.0 %             |
| 138Ba (KED) | 0.976 ppb             | 3.2 %             |
| 139La (KED) | 0.084 ppb             | 1.3 %             |
| 140Ce (KED) | 0.186 ppb             | 7.6 %             |
| 141Pr (KED) | 0.019 ppb             | 2.0 %             |
| 142Nd (KED) | 0.104 ppb             | 5.2 %             |
| 152Sm (KED) | 0.013 ppb             | 7.9 %             |
| 153Eu (KED) | 0.003 ppb             | 12.7 %            |
| 158Gd (KED) | 0.012 ppb             | 10.5 %            |
| 159Tb (KED) | 98.829 %              | 1.4 %             |
| 164Dy (KED) | 0.009 ppb             | 7.4 %             |
| 166Er (KED) | 0.003 ppb             | 27.9 %            |
| 169Tm (KED) | 0.001 ppb             | 10.0 %            |
| 174Yb (KED) | 0.003 ppb             | 11.7 %            |
| 175Lu (KED) | -0.008 ppb            | 23.0 %            |
| 205Tl (KED) | 0.003 ppb             | 1.8 %             |
| 208Pb (KED) | 0.185 ppb             | 3.3 %             |
| 209Bi (KED) | 95.143 %              | 1.3 %             |
| 232Th (KED) | 0.028 ppb             | 15.9 %            |
| 238U (KED)  | 0.011 ppb             | 68.7 %            |

| Category   | Concentration average | Intensity average | Intensity RSD |
|------------|-----------------------|-------------------|---------------|
| 6Li (KED)  | 108.077 %             | 2,959 cps         | 5.7 %         |
| 9Be (KED)  | 0.000 ppb             | 0 cps             |               |
| 11B (KED)  | 14.756 ppb            | 2,669 cps         | 2.2 %         |
| 24Mg (KED) | 55.368 ppb            | 32,090 cps        | 1.0 %         |
| 27Al (KED) | 86.571 ppb            | 12,283 cps        | 2.0 %         |

| Category    | Concentration average | Intensity average | Intensity RSD |
|-------------|-----------------------|-------------------|---------------|
| 45Sc (KED)  | 103.635 %             | 52,191 cps        | 0.3 %         |
| 51V (KED)   | 0.164 ppb             | 1,513 cps         | 0.8 %         |
| 52Cr (KED)  | 0.513 ppb             | 7,493 cps         | 3.6 %         |
| 55Mn (KED)  | 3.173 ppb             | 22,503 cps        | 1.2 %         |
| 56Fe (KED)  | 87.546 ppb            | 1,130,582 cps     | 0.7 %         |
| 58Ni (KED)  | 0.563 ppb             | 9,615 cps         | 0.2 %         |
| 59Co (KED)  | 0.051 ppb             | 1,425 cps         | 0.9 %         |
| 63Cu (KED)  | 2.061 ppb             | 42,108 cps        | 1.4 %         |
| 64Zn (KED)  | 51.037 ppb            | 273,212 cps       | 1.2 %         |
| 69Ga (KED)  | 0.318 ppb             | 2,225 cps         | 7.1 %         |
| 75As (KED)  | 0.109 ppb             | 172 cps           | 17.6 %        |
| 80Se (KED)  | -0.270 ppb            | 1,286 cps         | 3.1 %         |
| 85Rb (KED)  | 0.251 ppb             | 1,466 cps         | 2.0 %         |
| 88Sr (KED)  | 0.797 ppb             | 6,622 cps         | 3.2 %         |
| 89Y (KED)   | 98.185 %              | 436,898 cps       | 0.9 %         |
| 107Ag (KED) | 0.019 ppb             | 1,017 cps         | 11.8 %        |
| 114Cd (KED) | 0.008 ppb             | 182 cps           | 10.6 %        |
| 115In (KED) | 94.425 %              | 757,810 cps       | 1.8 %         |
| 133Cs (KED) | 0.018 ppb             | 542 cps           | 6.6 %         |
| 138Ba (KED) | 0.976 ppb             | 42,074 cps        | 1.5 %         |
| 139La (KED) | 0.084 ppb             | 7,324 cps         | 0.8 %         |
| 140Ce (KED) | 0.186 ppb             | 22,429 cps        | 7.7 %         |
| 141Pr (KED) | 0.019 ppb             | 2,267 cps         | 1.7 %         |
| 142Nd (KED) | 0.104 ppb             | 5,160 cps         | 3.7 %         |
| 152Sm (KED) | 0.013 ppb             | 546 cps           | 8.3 %         |
| 153Eu (KED) | 0.003 ppb             | 264 cps           | 11.4 %        |
| 158Gd (KED) | 0.012 ppb             | 694 cps           | 9.7 %         |
| 159Tb (KED) | 98.829 %              | 3,968,058 cps     | 1.4 %         |
| 164Dy (KED) | 0.009 ppb             | 562 cps           | 6.0 %         |
| 166Er (KED) | 0.003 ppb             | 570 cps           | 9.4 %         |
| 169Tm (KED) | 0.001 ppb             | 171 cps           | 10.7 %        |
| 174Yb (KED) | 0.003 ppb             | 310 cps           | 12.0 %        |
| 175Lu (KED) | -0.008 ppb            | 13,700 cps        | 1.8 %         |
| 205Tl (KED) | 0.003 ppb             | 589 cps           | 2.6 %         |
| 208Pb (KED) | 0.185 ppb             | 31,001 cps        | 1.2 %         |
| 209Bi (KED) | 95.143 %              | 3,251,860 cps     | 1.3 %         |
| 232Th (KED) | 0.028 ppb             | 7,075 cps         | 15.8 %        |
| 238U (KED)  | 0.011 ppb             | 3,036 cps         | 65.2 %        |

## Sample Summary

Instrument ID: iCAP Q

Analysis index: 13

Analysis name: 803270chang jian

Analysis started at: 11/3/2021 3:09:11 PM

User name: WINDOWS-UPCI4ER\Administrator

| Category    | Concentration average | Concentration RSD |
|-------------|-----------------------|-------------------|
| 6Li (KED)   | 106.657 %             | 2.5 %             |
| 9Be (KED)   | 0.044 ppb             | 52.0 %            |
| 11B (KED)   | -7.147 ppb            | 4.4 %             |
| 24Mg (KED)  | 94.151 ppb            | 2.2 %             |
| 27Al (KED)  | 178.673 ppb           | 0.9 %             |
| 45Sc (KED)  | 103.711 %             | 2.3 %             |
| 51V (KED)   | 0.335 ppb             | 4.8 %             |
| 52Cr (KED)  | 0.829 ppb             | 3.0 %             |
| 55Mn (KED)  | 5.241 ppb             | 1.1 %             |
| 56Fe (KED)  | 182.412 ppb           | 2.0 %             |
| 58Ni (KED)  | 1.123 ppb             | 2.7 %             |
| 59Co (KED)  | 0.090 ppb             | 4.1 %             |
| 63Cu (KED)  | 2.529 ppb             | 2.4 %             |
| 64Zn (KED)  | 54.123 ppb            | 0.6 %             |
| 69Ga (KED)  | 0.587 ppb             | 3.4 %             |
| 75As (KED)  | 0.156 ppb             | 17.3 %            |
| 80Se (KED)  | -0.248 ppb            | 36.2 %            |
| 85Rb (KED)  | 0.377 ppb             | 2.5 %             |
| 88Sr (KED)  | 1.290 ppb             | 2.7 %             |
| 89Y (KED)   | 98.996 %              | 1.4 %             |
| 107Ag (KED) | 0.077 ppb             | 4.4 %             |
| 114Cd (KED) | 0.007 ppb             | 11.4 %            |
| 115In (KED) | 97.403 %              | 1.4 %             |
| 133Cs (KED) | 0.033 ppb             | 9.5 %             |
| 138Ba (KED) | 1.896 ppb             | 0.8 %             |
| 139La (KED) | 0.177 ppb             | 4.1 %             |
| 140Ce (KED) | 0.358 ppb             | 1.4 %             |
| 141Pr (KED) | 0.041 ppb             | 4.3 %             |
| 142Nd (KED) | 0.218 ppb             | 2.0 %             |
| 152Sm (KED) | 0.032 ppb             | 4.4 %             |
| 153Eu (KED) | 0.006 ppb             | 6.1 %             |
| 158Gd (KED) | 0.028 ppb             | 4.6 %             |
| 159Tb (KED) | 98.908 %              | 1.3 %             |
| 164Dy (KED) | 0.018 ppb             | 4.0 %             |
| 166Er (KED) | 0.007 ppb             | 4.9 %             |
| 169Tm (KED) | 0.001 ppb             | 14.8 %            |
| 174Yb (KED) | 0.007 ppb             | 8.0 %             |
| 175Lu (KED) | -0.009 ppb            | 26.7 %            |
| 205Tl (KED) | 0.004 ppb             | 9.0 %             |
| 208Pb (KED) | 0.300 ppb             | 3.7 %             |
| 209Bi (KED) | 94.895 %              | 2.5 %             |
| 232Th (KED) | 0.051 ppb             | 4.9 %             |
| 238U (KED)  | 0.012 ppb             | 5.8 %             |

| Category   | Concentration average | Intensity average | Intensity RSD |
|------------|-----------------------|-------------------|---------------|
| 6Li (KED)  | 106.657 %             | 2,920 cps         | 2.5 %         |
| 9Be (KED)  | 0.044 ppb             | 7 cps             | 50.0 %        |
| 11B (KED)  | -7.147 ppb            | 1,241 cps         | 2.5 %         |
| 24Mg (KED) | 94.151 ppb            | 53,769 cps        | 2.2 %         |
| 27Al (KED) | 178.673 ppb           | 25,026 cps        | 2.4 %         |

| Category    | Concentration average | Intensity average | Intensity RSD |
|-------------|-----------------------|-------------------|---------------|
| 45Sc (KED)  | 103.711 %             | 52,229 cps        | 2.3 %         |
| 51V (KED)   | 0.335 ppb             | 3,084 cps         | 3.0 %         |
| 52Cr (KED)  | 0.829 ppb             | 12,037 cps        | 1.7 %         |
| 55Mn (KED)  | 5.241 ppb             | 37,132 cps        | 1.3 %         |
| 56Fe (KED)  | 182.412 ppb           | 2,351,491 cps     | 0.4 %         |
| 58Ni (KED)  | 1.123 ppb             | 18,851 cps        | 0.7 %         |
| 59Co (KED)  | 0.090 ppb             | 2,465 cps         | 1.8 %         |
| 63Cu (KED)  | 2.529 ppb             | 51,883 cps        | 1.9 %         |
| 64Zn (KED)  | 54.123 ppb            | 291,462 cps       | 2.0 %         |
| 69Ga (KED)  | 0.587 ppb             | 3,994 cps         | 2.1 %         |
| 75As (KED)  | 0.156 ppb             | 243 cps           | 15.4 %        |
| 80Se (KED)  | -0.248 ppb            | 1,307 cps         | 4.0 %         |
| 85Rb (KED)  | 0.377 ppb             | 2,214 cps         | 2.6 %         |
| 88Sr (KED)  | 1.290 ppb             | 10,680 cps        | 2.0 %         |
| 89Y (KED)   | 98.996 %              | 440,506 cps       | 1.4 %         |
| 107Ag (KED) | 0.077 ppb             | 4,077 cps         | 2.9 %         |
| 114Cd (KED) | 0.007 ppb             | 184 cps           | 10.0 %        |
| 115In (KED) | 97.403 %              | 781,714 cps       | 1.4 %         |
| 133Cs (KED) | 0.033 ppb             | 981 cps           | 8.0 %         |
| 138Ba (KED) | 1.896 ppb             | 78,476 cps        | 0.6 %         |
| 139La (KED) | 0.177 ppb             | 15,408 cps        | 3.6 %         |
| 140Ce (KED) | 0.358 ppb             | 42,178 cps        | 1.4 %         |
| 141Pr (KED) | 0.041 ppb             | 4,912 cps         | 3.0 %         |
| 142Nd (KED) | 0.218 ppb             | 10,558 cps        | 2.4 %         |
| 152Sm (KED) | 0.032 ppb             | 1,319 cps         | 4.6 %         |
| 153Eu (KED) | 0.006 ppb             | 494 cps           | 7.0 %         |
| 158Gd (KED) | 0.028 ppb             | 1,590 cps         | 3.8 %         |
| 159Tb (KED) | 98.908 %              | 3,971,217 cps     | 1.3 %         |
| 164Dy (KED) | 0.018 ppb             | 1,126 cps         | 2.7 %         |
| 166Er (KED) | 0.007 ppb             | 879 cps           | 3.2 %         |
| 169Tm (KED) | 0.001 ppb             | 331 cps           | 13.1 %        |
| 174Yb (KED) | 0.007 ppb             | 677 cps           | 8.5 %         |
| 175Lu (KED) | -0.009 ppb            | 13,639 cps        | 1.3 %         |
| 205Tl (KED) | 0.004 ppb             | 729 cps           | 6.0 %         |
| 208Pb (KED) | 0.300 ppb             | 44,448 cps        | 2.7 %         |
| 209Bi (KED) | 94.895 %              | 3,243,378 cps     | 2.5 %         |
| 232Th (KED) | 0.051 ppb             | 12,642 cps        | 3.3 %         |
| 238U (KED)  | 0.012 ppb             | 3,267 cps         | 3.9 %         |

## Sample Summary

Instrument ID: iCAP Q

Analysis index: 14

Analysis name: 80073

Analysis started at: 11/3/2021 3:12:23 PM

User name: WINDOWS-UPCI4ER\Administrator

| Category    | Concentration average | Concentration RSD |
|-------------|-----------------------|-------------------|
| 6Li (KED)   | 103.328 %             | 2.2 %             |
| 9Be (KED)   | 0.038 ppb             | 36.1 %            |
| 11B (KED)   | 3.568 ppb             | 34.9 %            |
| 24Mg (KED)  | 104.965 ppb           | 1.0 %             |
| 27Al (KED)  | 155.684 ppb           | 1.6 %             |
| 45Sc (KED)  | 101.828 %             | 1.2 %             |
| 51V (KED)   | 0.286 ppb             | 5.7 %             |
| 52Cr (KED)  | 0.919 ppb             | 0.8 %             |
| 55Mn (KED)  | 4.935 ppb             | 2.5 %             |
| 56Fe (KED)  | 146.685 ppb           | 1.5 %             |
| 58Ni (KED)  | 0.789 ppb             | 2.1 %             |
| 59Co (KED)  | 0.074 ppb             | 3.9 %             |
| 63Cu (KED)  | 2.553 ppb             | 1.4 %             |
| 64Zn (KED)  | 53.565 ppb            | 1.1 %             |
| 69Ga (KED)  | 0.543 ppb             | 4.8 %             |
| 75As (KED)  | 0.114 ppb             | 5.7 %             |
| 80Se (KED)  | -0.179 ppb            | 24.8 %            |
| 85Rb (KED)  | 0.873 ppb             | 4.8 %             |
| 88Sr (KED)  | 1.109 ppb             | 0.7 %             |
| 89Y (KED)   | 98.583 %              | 1.3 %             |
| 107Ag (KED) | 0.052 ppb             | 7.8 %             |
| 114Cd (KED) | 0.011 ppb             | 4.8 %             |
| 115In (KED) | 94.469 %              | 2.1 %             |
| 133Cs (KED) | 0.027 ppb             | 7.5 %             |
| 138Ba (KED) | 1.738 ppb             | 2.9 %             |
| 139La (KED) | 0.141 ppb             | 2.2 %             |
| 140Ce (KED) | 0.295 ppb             | 1.2 %             |
| 141Pr (KED) | 0.034 ppb             | 2.7 %             |
| 142Nd (KED) | 0.174 ppb             | 0.2 %             |
| 152Sm (KED) | 0.024 ppb             | 8.8 %             |
| 153Eu (KED) | 0.004 ppb             | 6.8 %             |
| 158Gd (KED) | 0.021 ppb             | 8.9 %             |
| 159Tb (KED) | 97.951 %              | 0.9 %             |
| 164Dy (KED) | 0.013 ppb             | 8.5 %             |
| 166Er (KED) | 0.005 ppb             | 19.2 %            |
| 169Tm (KED) | 0.001 ppb             | 13.2 %            |
| 174Yb (KED) | 0.005 ppb             | 5.1 %             |
| 175Lu (KED) | -0.010 ppb            | 20.0 %            |
| 205Tl (KED) | 0.004 ppb             | 11.0 %            |
| 208Pb (KED) | 0.225 ppb             | 3.9 %             |
| 209Bi (KED) | 93.149 %              | 1.2 %             |
| 232Th (KED) | 0.040 ppb             | 1.9 %             |
| 238U (KED)  | 0.008 ppb             | 4.2 %             |

| Category   | Concentration average | Intensity average | Intensity RSD |
|------------|-----------------------|-------------------|---------------|
| 6Li (KED)  | 103.328 %             | 2,829 cps         | 2.2 %         |
| 9Be (KED)  | 0.038 ppb             | 6 cps             | 34.6 %        |
| 11B (KED)  | 3.568 ppb             | 1,865 cps         | 4.9 %         |
| 24Mg (KED) | 104.965 ppb           | 58,046 cps        | 1.7 %         |
| 27Al (KED) | 155.684 ppb           | 21,448 cps        | 0.5 %         |

| Category    | Concentration average | Intensity average | Intensity RSD |
|-------------|-----------------------|-------------------|---------------|
| 45Sc (KED)  | 101.828 %             | 51,281 cps        | 1.2 %         |
| 51V (KED)   | 0.286 ppb             | 2,590 cps         | 5.6 %         |
| 52Cr (KED)  | 0.919 ppb             | 13,095 cps        | 0.5 %         |
| 55Mn (KED)  | 4.935 ppb             | 34,334 cps        | 1.7 %         |
| 56Fe (KED)  | 146.685 ppb           | 1,857,870 cps     | 0.3 %         |
| 58Ni (KED)  | 0.789 ppb             | 13,107 cps        | 1.6 %         |
| 59Co (KED)  | 0.074 ppb             | 1,998 cps         | 4.7 %         |
| 63Cu (KED)  | 2.553 ppb             | 52,148 cps        | 0.7 %         |
| 64Zn (KED)  | 53.565 ppb            | 287,337 cps       | 0.6 %         |
| 69Ga (KED)  | 0.543 ppb             | 3,694 cps         | 5.5 %         |
| 75As (KED)  | 0.114 ppb             | 180 cps           | 4.9 %         |
| 80Se (KED)  | -0.179 ppb            | 1,331 cps         | 1.2 %         |
| 85Rb (KED)  | 0.873 ppb             | 5,073 cps         | 3.6 %         |
| 88Sr (KED)  | 1.109 ppb             | 9,175 cps         | 0.9 %         |
| 89Y (KED)   | 98.583 %              | 438,667 cps       | 1.3 %         |
| 107Ag (KED) | 0.052 ppb             | 2,689 cps         | 6.7 %         |
| 114Cd (KED) | 0.011 ppb             | 244 cps           | 5.7 %         |
| 115In (KED) | 94.469 %              | 758,161 cps       | 2.1 %         |
| 133Cs (KED) | 0.027 ppb             | 791 cps           | 5.4 %         |
| 138Ba (KED) | 1.738 ppb             | 71,513 cps        | 2.0 %         |
| 139La (KED) | 0.141 ppb             | 12,177 cps        | 1.4 %         |
| 140Ce (KED) | 0.295 ppb             | 34,606 cps        | 1.1 %         |
| 141Pr (KED) | 0.034 ppb             | 3,958 cps         | 3.2 %         |
| 142Nd (KED) | 0.174 ppb             | 8,390 cps         | 0.9 %         |
| 152Sm (KED) | 0.024 ppb             | 999 cps           | 8.0 %         |
| 153Eu (KED) | 0.004 ppb             | 379 cps           | 5.9 %         |
| 158Gd (KED) | 0.021 ppb             | 1,172 cps         | 9.7 %         |
| 159Tb (KED) | 97.951 %              | 3,932,805 cps     | 0.9 %         |
| 164Dy (KED) | 0.013 ppb             | 840 cps           | 7.3 %         |
| 166Er (KED) | 0.005 ppb             | 698 cps           | 10.1 %        |
| 169Tm (KED) | 0.001 ppb             | 226 cps           | 12.3 %        |
| 174Yb (KED) | 0.005 ppb             | 489 cps           | 5.2 %         |
| 175Lu (KED) | -0.010 ppb            | 13,269 cps        | 1.6 %         |
| 205Tl (KED) | 0.004 ppb             | 756 cps           | 9.4 %         |
| 208Pb (KED) | 0.225 ppb             | 34,979 cps        | 1.9 %         |
| 209Bi (KED) | 93.149 %              | 3,183,710 cps     | 1.2 %         |
| 232Th (KED) | 0.040 ppb             | 9,730 cps         | 0.8 %         |
| 238U (KED)  | 0.008 ppb             | 2,258 cps         | 3.3 %         |

## Sample Summary

Instrument ID: iCAP Q

Analysis index: 15

Analysis name: 805324chang jian

Analysis started at: 11/3/2021 3:15:31 PM

User name: WINDOWS-UPCI4ER\Administrator

| Category    | Concentration average | Concentration RSD |
|-------------|-----------------------|-------------------|
| 6Li (KED)   | 107.347 %             | 2.0 %             |
| 9Be (KED)   | 0.000 ppb             |                   |
| 11B (KED)   | -19.663 ppb           | 3.8 %             |
| 24Mg (KED)  | 141.120 ppb           | 1.5 %             |
| 27Al (KED)  | 200.274 ppb           | 2.2 %             |
| 45Sc (KED)  | 100.645 %             | 0.8 %             |
| 51V (KED)   | 0.408 ppb             | 3.3 %             |
| 52Cr (KED)  | 1.370 ppb             | 1.6 %             |
| 55Mn (KED)  | 5.838 ppb             | 1.2 %             |
| 56Fe (KED)  | 246.404 ppb           | 0.7 %             |
| 58Ni (KED)  | 1.245 ppb             | 1.2 %             |
| 59Co (KED)  | 0.108 ppb             | 1.4 %             |
| 63Cu (KED)  | 2.572 ppb             | 2.4 %             |
| 64Zn (KED)  | 62.189 ppb            | 0.8 %             |
| 69Ga (KED)  | 0.618 ppb             | 5.1 %             |
| 75As (KED)  | 0.170 ppb             | 17.6 %            |
| 80Se (KED)  | -0.370 ppb            | 17.3 %            |
| 85Rb (KED)  | 0.784 ppb             | 1.7 %             |
| 88Sr (KED)  | 1.416 ppb             | 2.7 %             |
| 89Y (KED)   | 95.565 %              | 1.2 %             |
| 107Ag (KED) | 0.016 ppb             | 5.3 %             |
| 114Cd (KED) | 0.008 ppb             | 9.9 %             |
| 115In (KED) | 91.909 %              | 1.3 %             |
| 133Cs (KED) | 0.044 ppb             | 6.2 %             |
| 138Ba (KED) | 1.896 ppb             | 0.4 %             |
| 139La (KED) | 0.196 ppb             | 1.1 %             |
| 140Ce (KED) | 0.418 ppb             | 2.0 %             |
| 141Pr (KED) | 0.047 ppb             | 3.6 %             |
| 142Nd (KED) | 0.251 ppb             | 2.1 %             |
| 152Sm (KED) | 0.035 ppb             | 3.3 %             |
| 153Eu (KED) | 0.007 ppb             | 8.4 %             |
| 158Gd (KED) | 0.029 ppb             | 0.6 %             |
| 159Tb (KED) | 96.620 %              | 1.5 %             |
| 164Dy (KED) | 0.019 ppb             | 8.3 %             |
| 166Er (KED) | 0.008 ppb             | 3.8 %             |
| 169Tm (KED) | 0.001 ppb             | 4.6 %             |
| 174Yb (KED) | 0.007 ppb             | 10.1 %            |
| 175Lu (KED) | -0.010 ppb            | 28.8 %            |
| 205Tl (KED) | 0.005 ppb             | 7.3 %             |
| 208Pb (KED) | 0.290 ppb             | 4.9 %             |
| 209Bi (KED) | 92.439 %              | 2.1 %             |
| 232Th (KED) | 0.061 ppb             | 2.9 %             |
| 238U (KED)  | 0.012 ppb             | 3.6 %             |

| Category   | Concentration average | Intensity average | Intensity RSD |
|------------|-----------------------|-------------------|---------------|
| 6Li (KED)  | 107.347 %             | 2,939 cps         | 2.0 %         |
| 9Be (KED)  | 0.000 ppb             | 0 cps             |               |
| 11B (KED)  | -19.663 ppb           | 446 cps           | 8.7 %         |
| 24Mg (KED) | 141.120 ppb           | 80,963 cps        | 0.6 %         |
| 27Al (KED) | 200.274 ppb           | 27,182 cps        | 1.5 %         |

| Category    | Concentration average | Intensity average | Intensity RSD |
|-------------|-----------------------|-------------------|---------------|
| 45Sc (KED)  | 100.645 %             | 50,685 cps        | 0.8 %         |
| 51V (KED)   | 0.408 ppb             | 3,645 cps         | 2.7 %         |
| 52Cr (KED)  | 1.370 ppb             | 19,231 cps        | 2.0 %         |
| 55Mn (KED)  | 5.838 ppb             | 40,130 cps        | 0.8 %         |
| 56Fe (KED)  | 246.404 ppb           | 3,081,935 cps     | 1.5 %         |
| 58Ni (KED)  | 1.245 ppb             | 20,261 cps        | 1.8 %         |
| 59Co (KED)  | 0.108 ppb             | 2,871 cps         | 0.6 %         |
| 63Cu (KED)  | 2.572 ppb             | 50,906 cps        | 1.3 %         |
| 64Zn (KED)  | 62.189 ppb            | 321,587 cps       | 1.4 %         |
| 69Ga (KED)  | 0.618 ppb             | 4,047 cps         | 4.5 %         |
| 75As (KED)  | 0.170 ppb             | 256 cps           | 17.7 %        |
| 80Se (KED)  | -0.370 ppb            | 1,209 cps         | 1.4 %         |
| 85Rb (KED)  | 0.784 ppb             | 4,416 cps         | 2.6 %         |
| 88Sr (KED)  | 1.416 ppb             | 11,294 cps        | 1.5 %         |
| 89Y (KED)   | 95.565 %              | 425,239 cps       | 1.2 %         |
| 107Ag (KED) | 0.016 ppb             | 841 cps           | 4.0 %         |
| 114Cd (KED) | 0.008 ppb             | 184 cps           | 6.8 %         |
| 115In (KED) | 91.909 %              | 737,619 cps       | 1.3 %         |
| 133Cs (KED) | 0.044 ppb             | 1,226 cps         | 6.6 %         |
| 138Ba (KED) | 1.896 ppb             | 76,667 cps        | 1.5 %         |
| 139La (KED) | 0.196 ppb             | 16,708 cps        | 0.6 %         |
| 140Ce (KED) | 0.418 ppb             | 47,866 cps        | 1.0 %         |
| 141Pr (KED) | 0.047 ppb             | 5,473 cps         | 5.0 %         |
| 142Nd (KED) | 0.251 ppb             | 11,817 cps        | 2.4 %         |
| 152Sm (KED) | 0.035 ppb             | 1,415 cps         | 4.7 %         |
| 153Eu (KED) | 0.007 ppb             | 578 cps           | 7.1 %         |
| 158Gd (KED) | 0.029 ppb             | 1,606 cps         | 2.0 %         |
| 159Tb (KED) | 96.620 %              | 3,879,362 cps     | 1.5 %         |
| 164Dy (KED) | 0.019 ppb             | 1,193 cps         | 6.9 %         |
| 166Er (KED) | 0.008 ppb             | 891 cps           | 1.3 %         |
| 169Tm (KED) | 0.001 ppb             | 283 cps           | 3.5 %         |
| 174Yb (KED) | 0.007 ppb             | 660 cps           | 9.7 %         |
| 175Lu (KED) | -0.010 ppb            | 13,191 cps        | 2.7 %         |
| 205Tl (KED) | 0.005 ppb             | 794 cps           | 5.1 %         |
| 208Pb (KED) | 0.290 ppb             | 42,093 cps        | 3.5 %         |
| 209Bi (KED) | 92.439 %              | 3,159,421 cps     | 2.1 %         |
| 232Th (KED) | 0.061 ppb             | 14,653 cps        | 0.9 %         |
| 238U (KED)  | 0.012 ppb             | 3,232 cps         | 4.7 %         |

## Sample Summary

Instrument ID: iCAP Q

Analysis index: 16

Analysis name: 706081chang jian

Analysis started at: 11/3/2021 3:18:44 PM

User name: WINDOWS-UPCI4ER\Administrator

| Category    | Concentration average | Concentration RSD |
|-------------|-----------------------|-------------------|
| 6Li (KED)   | 106.819 %             | 2.6 %             |
| 9Be (KED)   | 0.021 ppb             | 173.2 %           |
| 11B (KED)   | 4.987 ppb             | 21.5 %            |
| 24Mg (KED)  | 85.211 ppb            | 3.2 %             |
| 27Al (KED)  | 112.083 ppb           | 0.2 %             |
| 45Sc (KED)  | 104.446 %             | 2.0 %             |
| 51V (KED)   | 0.198 ppb             | 2.6 %             |
| 52Cr (KED)  | 0.849 ppb             | 1.9 %             |
| 55Mn (KED)  | 3.850 ppb             | 1.7 %             |
| 56Fe (KED)  | 114.329 ppb           | 2.4 %             |
| 58Ni (KED)  | 1.111 ppb             | 2.7 %             |
| 59Co (KED)  | 0.056 ppb             | 7.9 %             |
| 63Cu (KED)  | 2.746 ppb             | 0.8 %             |
| 64Zn (KED)  | 47.821 ppb            | 1.4 %             |
| 69Ga (KED)  | 0.439 ppb             | 0.5 %             |
| 75As (KED)  | 0.102 ppb             | 11.1 %            |
| 80Se (KED)  | -0.076 ppb            | 157.8 %           |
| 85Rb (KED)  | 0.644 ppb             | 2.5 %             |
| 88Sr (KED)  | 0.961 ppb             | 4.2 %             |
| 89Y (KED)   | 97.986 %              | 0.2 %             |
| 107Ag (KED) | 0.015 ppb             | 1.8 %             |
| 114Cd (KED) | 0.006 ppb             | 19.5 %            |
| 115In (KED) | 95.414 %              | 1.6 %             |
| 133Cs (KED) | 0.022 ppb             | 3.1 %             |
| 138Ba (KED) | 1.294 ppb             | 5.0 %             |
| 139La (KED) | 0.104 ppb             | 6.5 %             |
| 140Ce (KED) | 0.230 ppb             | 4.6 %             |
| 141Pr (KED) | 0.024 ppb             | 4.2 %             |
| 142Nd (KED) | 0.138 ppb             | 2.9 %             |
| 152Sm (KED) | 0.018 ppb             | 9.6 %             |
| 153Eu (KED) | 0.003 ppb             | 11.5 %            |
| 158Gd (KED) | 0.015 ppb             | 8.7 %             |
| 159Tb (KED) | 98.801 %              | 4.2 %             |
| 164Dy (KED) | 0.010 ppb             | 1.6 %             |
| 166Er (KED) | 0.004 ppb             | 8.3 %             |
| 169Tm (KED) | 0.001 ppb             | 20.8 %            |
| 174Yb (KED) | 0.004 ppb             | 17.5 %            |
| 175Lu (KED) | -0.008 ppb            | 67.6 %            |
| 205Tl (KED) | 0.004 ppb             | 8.8 %             |
| 208Pb (KED) | 0.221 ppb             | 1.2 %             |
| 209Bi (KED) | 93.034 %              | 1.2 %             |
| 232Th (KED) | 0.032 ppb             | 2.1 %             |
| 238U (KED)  | 0.009 ppb             | 7.0 %             |

| Category   | Concentration average | Intensity average | Intensity RSD |
|------------|-----------------------|-------------------|---------------|
| 6Li (KED)  | 106.819 %             | 2,925 cps         | 2.6 %         |
| 9Be (KED)  | 0.021 ppb             | 3 cps             | 173.2 %       |
| 11B (KED)  | 4.987 ppb             | 2,017 cps         | 0.8 %         |
| 24Mg (KED) | 85.211 ppb            | 48,752 cps        | 1.4 %         |
| 27Al (KED) | 112.083 ppb           | 15,931 cps        | 1.9 %         |

| Category    | Concentration average | Intensity average | Intensity RSD |
|-------------|-----------------------|-------------------|---------------|
| 45Sc (KED)  | 104.446 %             | 52,600 cps        | 2.0 %         |
| 51V (KED)   | 0.198 ppb             | 1,840 cps         | 3.8 %         |
| 52Cr (KED)  | 0.849 ppb             | 12,414 cps        | 2.0 %         |
| 55Mn (KED)  | 3.850 ppb             | 27,491 cps        | 1.0 %         |
| 56Fe (KED)  | 114.329 ppb           | 1,486,079 cps     | 0.5 %         |
| 58Ni (KED)  | 1.111 ppb             | 18,789 cps        | 0.8 %         |
| 59Co (KED)  | 0.056 ppb             | 1,565 cps         | 5.7 %         |
| 63Cu (KED)  | 2.746 ppb             | 55,675 cps        | 0.9 %         |
| 64Zn (KED)  | 47.821 ppb            | 256,234 cps       | 1.1 %         |
| 69Ga (KED)  | 0.439 ppb             | 3,000 cps         | 0.2 %         |
| 75As (KED)  | 0.102 ppb             | 161 cps           | 10.4 %        |
| 80Se (KED)  | -0.076 ppb            | 1,368 cps         | 3.7 %         |
| 85Rb (KED)  | 0.644 ppb             | 3,727 cps         | 2.3 %         |
| 88Sr (KED)  | 0.961 ppb             | 7,930 cps         | 4.2 %         |
| 89Y (KED)   | 97.986 %              | 436,013 cps       | 0.2 %         |
| 107Ag (KED) | 0.015 ppb             | 806 cps           | 3.0 %         |
| 114Cd (KED) | 0.006 ppb             | 161 cps           | 12.6 %        |
| 115In (KED) | 95.414 %              | 765,744 cps       | 1.6 %         |
| 133Cs (KED) | 0.022 ppb             | 650 cps           | 4.5 %         |
| 138Ba (KED) | 1.294 ppb             | 54,577 cps        | 2.4 %         |
| 139La (KED) | 0.104 ppb             | 9,047 cps         | 4.7 %         |
| 140Ce (KED) | 0.230 ppb             | 27,444 cps        | 0.6 %         |
| 141Pr (KED) | 0.024 ppb             | 2,907 cps         | 1.1 %         |
| 142Nd (KED) | 0.138 ppb             | 6,759 cps         | 1.5 %         |
| 152Sm (KED) | 0.018 ppb             | 769 cps           | 5.6 %         |
| 153Eu (KED) | 0.003 ppb             | 262 cps           | 8.9 %         |
| 158Gd (KED) | 0.015 ppb             | 852 cps           | 11.3 %        |
| 159Tb (KED) | 98.801 %              | 3,966,921 cps     | 4.2 %         |
| 164Dy (KED) | 0.010 ppb             | 652 cps           | 5.4 %         |
| 166Er (KED) | 0.004 ppb             | 647 cps           | 3.7 %         |
| 169Tm (KED) | 0.001 ppb             | 167 cps           | 23.1 %        |
| 174Yb (KED) | 0.004 ppb             | 380 cps           | 12.4 %        |
| 175Lu (KED) | -0.008 ppb            | 13,778 cps        | 1.6 %         |
| 205Tl (KED) | 0.004 ppb             | 700 cps           | 7.8 %         |
| 208Pb (KED) | 0.221 ppb             | 34,468 cps        | 1.3 %         |
| 209Bi (KED) | 93.034 %              | 3,179,774 cps     | 1.2 %         |
| 232Th (KED) | 0.032 ppb             | 7,871 cps         | 0.8 %         |
| 238U (KED)  | 0.009 ppb             | 2,406 cps         | 7.6 %         |

## Sample Summary

Instrument ID: iCAP Q

Analysis index: 17

Analysis name: 500157duan jian

Analysis started at: 11/3/2021 3:21:57 PM

User name: WINDOWS-UPCI4ER\Administrator

| Category    | Concentration average | Concentration RSD |
|-------------|-----------------------|-------------------|
| 6Li (KED)   | 107.062 %             | 2.8 %             |
| 9Be (KED)   | 0.000 ppb             |                   |
| 11B (KED)   | -4.802 ppb            | 41.6 %            |
| 24Mg (KED)  | 78.040 ppb            | 4.4 %             |
| 27Al (KED)  | 143.507 ppb           | 2.2 %             |
| 45Sc (KED)  | 104.735 %             | 2.0 %             |
| 51V (KED)   | 0.272 ppb             | 7.8 %             |
| 52Cr (KED)  | 0.645 ppb             | 1.9 %             |
| 55Mn (KED)  | 5.659 ppb             | 1.5 %             |
| 56Fe (KED)  | 128.060 ppb           | 1.0 %             |
| 58Ni (KED)  | 0.821 ppb             | 0.5 %             |
| 59Co (KED)  | 0.086 ppb             | 5.4 %             |
| 63Cu (KED)  | 2.913 ppb             | 2.1 %             |
| 64Zn (KED)  | 45.688 ppb            | 1.9 %             |
| 69Ga (KED)  | 0.493 ppb             | 3.2 %             |
| 75As (KED)  | 0.105 ppb             | 6.3 %             |
| 80Se (KED)  | -0.084 ppb            | 102.5 %           |
| 85Rb (KED)  | 0.316 ppb             | 5.1 %             |
| 88Sr (KED)  | 1.041 ppb             | 2.9 %             |
| 89Y (KED)   | 98.723 %              | 1.0 %             |
| 107Ag (KED) | 0.026 ppb             | 3.8 %             |
| 114Cd (KED) | 0.015 ppb             | 8.1 %             |
| 115In (KED) | 95.716 %              | 1.3 %             |
| 133Cs (KED) | 0.026 ppb             | 8.0 %             |
| 138Ba (KED) | 1.514 ppb             | 2.0 %             |
| 139La (KED) | 0.128 ppb             | 1.1 %             |
| 140Ce (KED) | 0.272 ppb             | 3.5 %             |
| 141Pr (KED) | 0.030 ppb             | 4.6 %             |
| 142Nd (KED) | 0.165 ppb             | 2.0 %             |
| 152Sm (KED) | 0.022 ppb             | 3.7 %             |
| 153Eu (KED) | 0.005 ppb             | 2.4 %             |
| 158Gd (KED) | 0.020 ppb             | 5.7 %             |
| 159Tb (KED) | 98.149 %              | 0.7 %             |
| 164Dy (KED) | 0.014 ppb             | 3.4 %             |
| 166Er (KED) | 0.005 ppb             | 23.8 %            |
| 169Tm (KED) | 0.001 ppb             | 5.7 %             |
| 174Yb (KED) | 0.006 ppb             | 8.1 %             |
| 175Lu (KED) | -0.008 ppb            | 27.5 %            |
| 205Tl (KED) | 0.003 ppb             | 10.5 %            |
| 208Pb (KED) | 0.308 ppb             | 0.5 %             |
| 209Bi (KED) | 94.429 %              | 1.2 %             |
| 232Th (KED) | 0.036 ppb             | 1.7 %             |
| 238U (KED)  | 0.011 ppb             | 3.4 %             |

| Category   | Concentration average | Intensity average | Intensity RSD |
|------------|-----------------------|-------------------|---------------|
| 6Li (KED)  | 107.062 %             | 2,931 cps         | 2.8 %         |
| 9Be (KED)  | 0.000 ppb             | 0 cps             |               |
| 11B (KED)  | -4.802 ppb            | 1,395 cps         | 7.6 %         |
| 24Mg (KED) | 78.040 ppb            | 44,768 cps        | 2.4 %         |
| 27Al (KED) | 143.507 ppb           | 20,359 cps        | 1.4 %         |

| Category    | Concentration average | Intensity average | Intensity RSD |
|-------------|-----------------------|-------------------|---------------|
| 45Sc (KED)  | 104.735 %             | 52,745 cps        | 2.0 %         |
| 51V (KED)   | 0.272 ppb             | 2,531 cps         | 5.8 %         |
| 52Cr (KED)  | 0.645 ppb             | 9,490 cps         | 0.2 %         |
| 55Mn (KED)  | 5.659 ppb             | 40,479 cps        | 0.8 %         |
| 56Fe (KED)  | 128.060 ppb           | 1,668,854 cps     | 1.0 %         |
| 58Ni (KED)  | 0.821 ppb             | 14,013 cps        | 1.5 %         |
| 59Co (KED)  | 0.086 ppb             | 2,380 cps         | 5.5 %         |
| 63Cu (KED)  | 2.913 ppb             | 59,445 cps        | 1.2 %         |
| 64Zn (KED)  | 45.688 ppb            | 247,142 cps       | 0.9 %         |
| 69Ga (KED)  | 0.493 ppb             | 3,375 cps         | 3.9 %         |
| 75As (KED)  | 0.105 ppb             | 167 cps           | 5.3 %         |
| 80Se (KED)  | -0.084 ppb            | 1,375 cps         | 1.7 %         |
| 85Rb (KED)  | 0.316 ppb             | 1,852 cps         | 5.9 %         |
| 88Sr (KED)  | 1.041 ppb             | 8,640 cps         | 3.5 %         |
| 89Y (KED)   | 98.723 %              | 439,289 cps       | 1.0 %         |
| 107Ag (KED) | 0.026 ppb             | 1,349 cps         | 3.7 %         |
| 114Cd (KED) | 0.015 ppb             | 332 cps           | 5.7 %         |
| 115In (KED) | 95.716 %              | 768,173 cps       | 1.3 %         |
| 133Cs (KED) | 0.026 ppb             | 769 cps           | 8.9 %         |
| 138Ba (KED) | 1.514 ppb             | 62,884 cps        | 1.8 %         |
| 139La (KED) | 0.128 ppb             | 11,064 cps        | 1.1 %         |
| 140Ce (KED) | 0.272 ppb             | 32,040 cps        | 3.2 %         |
| 141Pr (KED) | 0.030 ppb             | 3,546 cps         | 3.9 %         |
| 142Nd (KED) | 0.165 ppb             | 7,988 cps         | 2.3 %         |
| 152Sm (KED) | 0.022 ppb             | 930 cps           | 4.3 %         |
| 153Eu (KED) | 0.005 ppb             | 401 cps           | 2.9 %         |
| 158Gd (KED) | 0.020 ppb             | 1,128 cps         | 6.0 %         |
| 159Tb (KED) | 98.149 %              | 3,940,762 cps     | 0.7 %         |
| 164Dy (KED) | 0.014 ppb             | 880 cps           | 4.0 %         |
| 166Er (KED) | 0.005 ppb             | 718 cps           | 11.6 %        |
| 169Tm (KED) | 0.001 ppb             | 223 cps           | 5.2 %         |
| 174Yb (KED) | 0.006 ppb             | 568 cps           | 7.8 %         |
| 175Lu (KED) | -0.008 ppb            | 13,590 cps        | 2.3 %         |
| 205Tl (KED) | 0.003 ppb             | 618 cps           | 9.8 %         |
| 208Pb (KED) | 0.308 ppb             | 45,145 cps        | 1.1 %         |
| 209Bi (KED) | 94.429 %              | 3,227,438 cps     | 1.2 %         |
| 232Th (KED) | 0.036 ppb             | 9,074 cps         | 1.6 %         |
| 238U (KED)  | 0.011 ppb             | 3,029 cps         | 3.6 %         |

## Sample Summary

Instrument ID: iCAP Q

Analysis index: 18

Analysis name: 80127

Analysis started at: 11/3/2021 3:25:06 PM

User name: WINDOWS-UPCI4ER\Administrator

| Category    | Concentration average | Concentration RSD |
|-------------|-----------------------|-------------------|
| 6Li (KED)   | 35.755 %              | 172.3 %           |
| 11B (KED)   | Infinity ppb          |                   |
| 27Al (KED)  | 129.871 ppb           | 88.2 %            |
| 45Sc (KED)  | 31.421 %              | 172.7 %           |
| 51V (KED)   | 0.319 ppb             | 102.9 %           |
| 52Cr (KED)  | 11.158 ppb            | 153.0 %           |
| 55Mn (KED)  | 9.025 ppb             | 90.6 %            |
| 56Fe (KED)  | 201.696 ppb           | 39.6 %            |
| 58Ni (KED)  | 15.531 ppb            | 143.1 %           |
| 59Co (KED)  | 1.729 ppb             | 156.5 %           |
| 63Cu (KED)  | 98.233 ppb            | 164.2 %           |
| 64Zn (KED)  | 472.114 ppb           | 155.3 %           |
| 69Ga (KED)  | 0.753 ppb             | 107.8 %           |
| 75As (KED)  | 49.804 ppb            | 170.0 %           |
| 80Se (KED)  | 77,666.093 ppb        | 169.7 %           |
| 85Rb (KED)  | 13.785 ppb            | 151.5 %           |
| 88Sr (KED)  | 3.049 ppb             | 90.4 %            |
| 89Y (KED)   | 27.561 %              | 172.8 %           |
| 107Ag (KED) | 0.572 ppb             | 84.4 %            |
| 114Cd (KED) | 0.376 ppb             | 151.2 %           |
| 115In (KED) | 25.466 %              | 172.2 %           |
| 133Cs (KED) | 0.525 ppb             | 81.5 %            |
| 138Ba (KED) | 1.729 ppb             | 99.7 %            |
| 139La (KED) | 0.170 ppb             | 106.7 %           |
| 140Ce (KED) | 2.588 ppb             | 145.4 %           |
| 141Pr (KED) | 0.012 ppb             | 178.9 %           |
| 142Nd (KED) | 0.136 ppb             | 90.2 %            |
| 152Sm (KED) | 0.008 ppb             | 177.4 %           |
| 153Eu (KED) | 0.002 ppb             | 185.7 %           |
| 158Gd (KED) | 0.009 ppb             | 176.8 %           |
| 159Tb (KED) | 26.629 %              | 173.0 %           |
| 164Dy (KED) | 0.005 ppb             | 188.3 %           |
| 166Er (KED) | 0.000 ppb             | 7,205.7 %         |
| 169Tm (KED) | 1.119 ppb             | 171.4 %           |
| 174Yb (KED) | 0.002 ppb             | 199.4 %           |
| 175Lu (KED) | -0.034 ppb            | 173.1 %           |
| 205Tl (KED) | 3.024 ppb             | 132.5 %           |
| 208Pb (KED) | 3.227 ppb             | 126.1 %           |
| 209Bi (KED) | 25.063 %              | 172.9 %           |
| 232Th (KED) | 0.022 ppb             | 116.0 %           |
| 238U (KED)  | 0.005 ppb             | 195.6 %           |

| Category   | Concentration average | Intensity average | Intensity RSD |
|------------|-----------------------|-------------------|---------------|
| 6Li (KED)  | 35.755 %              | 979 cps           | 172.3 %       |
| 9Be (KED)  |                       | 0 cps             |               |
| 11B (KED)  | Infinity ppb          | 915 cps           | 169.1 %       |
| 24Mg (KED) |                       | 28,448 cps        | 172.7 %       |
| 27Al (KED) | 129.871 ppb           | 8,093 cps         | 172.7 %       |
| 45Sc (KED) | 31.421 %              | 15,824 cps        | 172.7 %       |
| 51V (KED)  | 0.319 ppb             | 850 cps           | 172.2 %       |

| Category    | Concentration average | Intensity average | Intensity RSD |
|-------------|-----------------------|-------------------|---------------|
| 52Cr (KED)  | 11.158 ppb            | 2,971 cps         | 170.2 %       |
| 55Mn (KED)  | 9.025 ppb             | 8,770 cps         | 172.5 %       |
| 56Fe (KED)  | 201.696 ppb           | 594,509 cps       | 172.6 %       |
| 58Ni (KED)  | 15.531 ppb            | 5,169 cps         | 169.7 %       |
| 59Co (KED)  | 1.729 ppb             | 1,539 cps         | 171.9 %       |
| 63Cu (KED)  | 98.233 ppb            | 15,392 cps        | 171.6 %       |
| 64Zn (KED)  | 472.114 ppb           | 72,643 cps        | 172.7 %       |
| 69Ga (KED)  | 0.753 ppb             | 1,305 cps         | 172.3 %       |
| 75As (KED)  | 49.804 ppb            | 51 cps            | 161.9 %       |
| 80Se (KED)  | 77,666.093 ppb        | 1,548 cps         | 12.1 %        |
| 85Rb (KED)  | 13.785 ppb            | 1,946 cps         | 172.3 %       |
| 88Sr (KED)  | 3.049 ppb             | 12,030 cps        | 172.9 %       |
| 89Y (KED)   | 27.561 %              | 122,637 cps       | 172.8 %       |
| 107Ag (KED) | 0.572 ppb             | 324 cps           | 136.8 %       |
| 114Cd (KED) | 0.376 ppb             | 71 cps            | 141.4 %       |
| 115In (KED) | 25.466 %              | 204,378 cps       | 172.2 %       |
| 133Cs (KED) | 0.525 ppb             | 267 cps           | 150.5 %       |
| 138Ba (KED) | 1.729 ppb             | 21,560 cps        | 172.9 %       |
| 139La (KED) | 0.170 ppb             | 3,543 cps         | 172.7 %       |
| 140Ce (KED) | 2.588 ppb             | 10,810 cps        | 172.9 %       |
| 141Pr (KED) | 0.012 ppb             | 1,135 cps         | 173.2 %       |
| 142Nd (KED) | 0.136 ppb             | 2,600 cps         | 173.0 %       |
| 152Sm (KED) | 0.008 ppb             | 284 cps           | 173.2 %       |
| 153Eu (KED) | 0.002 ppb             | 126 cps           | 173.2 %       |
| 158Gd (KED) | 0.009 ppb             | 424 cps           | 173.2 %       |
| 159Tb (KED) | 26.629 %              | 1,069,173 cps     | 173.0 %       |
| 164Dy (KED) | 0.005 ppb             | 298 cps           | 173.2 %       |
| 166Er (KED) | 0.000 ppb             | 278 cps           | 173.2 %       |
| 169Tm (KED) | 1.119 ppb             | 89 cps            | 166.7 %       |
| 174Yb (KED) | 0.002 ppb             | 168 cps           | 173.2 %       |
| 175Lu (KED) | -0.034 ppb            | 3,814 cps         | 173.0 %       |
| 205Tl (KED) | 3.024 ppb             | 562 cps           | 105.1 %       |
| 208Pb (KED) | 3.227 ppb             | 11,325 cps        | 170.7 %       |
| 209Bi (KED) | 25.063 %              | 856,606 cps       | 172.9 %       |
| 232Th (KED) | 0.022 ppb             | 3,185 cps         | 173.1 %       |
| 238U (KED)  | 0.005 ppb             | 1,200 cps         | 173.2 %       |

## Sample Summary

Instrument ID: iCAP Q

Analysis index: 19

Analysis name: 804239

Analysis started at: 11/3/2021 3:28:19 PM

User name: WINDOWS-UPCI4ER\Administrator

| Category    | Concentration average | Concentration RSD |
|-------------|-----------------------|-------------------|
| 6Li (KED)   | 109.579 %             | 3.5 %             |
| 9Be (KED)   | 0.014 ppb             | 86.7 %            |
| 11B (KED)   | -17.076 ppb           | 6.9 %             |
| 24Mg (KED)  | 128.398 ppb           | 3.2 %             |
| 27Al (KED)  | 218.617 ppb           | 3.2 %             |
| 45Sc (KED)  | 106.481 %             | 0.6 %             |
| 51V (KED)   | 0.388 ppb             | 4.3 %             |
| 52Cr (KED)  | 0.893 ppb             | 1.6 %             |
| 55Mn (KED)  | 6.302 ppb             | 1.3 %             |
| 56Fe (KED)  | 204.759 ppb           | 2.1 %             |
| 58Ni (KED)  | 1.302 ppb             | 1.7 %             |
| 59Co (KED)  | 0.106 ppb             | 3.0 %             |
| 63Cu (KED)  | 2.770 ppb             | 2.6 %             |
| 64Zn (KED)  | 52.619 ppb            | 1.8 %             |
| 69Ga (KED)  | 0.812 ppb             | 1.2 %             |
| 75As (KED)  | 0.153 ppb             | 19.0 %            |
| 80Se (KED)  | -0.286 ppb            | 80.6 %            |
| 85Rb (KED)  | 0.682 ppb             | 1.7 %             |
| 88Sr (KED)  | 1.779 ppb             | 1.2 %             |
| 89Y (KED)   | 101.520 %             | 1.4 %             |
| 107Ag (KED) | 0.046 ppb             | 4.0 %             |
| 114Cd (KED) | 0.013 ppb             | 18.6 %            |
| 115In (KED) | 96.479 %              | 0.6 %             |
| 133Cs (KED) | 0.041 ppb             | 1.1 %             |
| 138Ba (KED) | 2.503 ppb             | 1.4 %             |
| 139La (KED) | 0.248 ppb             | 2.9 %             |
| 140Ce (KED) | 0.526 ppb             | 3.1 %             |
| 141Pr (KED) | 0.057 ppb             | 0.9 %             |
| 142Nd (KED) | 0.317 ppb             | 3.0 %             |
| 152Sm (KED) | 0.040 ppb             | 4.9 %             |
| 153Eu (KED) | 0.006 ppb             | 3.1 %             |
| 158Gd (KED) | 0.033 ppb             | 1.6 %             |
| 159Tb (KED) | 99.352 %              | 1.3 %             |
| 164Dy (KED) | 0.021 ppb             | 6.7 %             |
| 166Er (KED) | 0.009 ppb             | 10.5 %            |
| 169Tm (KED) | 0.001 ppb             | 15.7 %            |
| 174Yb (KED) | 0.008 ppb             | 9.2 %             |
| 175Lu (KED) | -0.006 ppb            | 30.0 %            |
| 205Tl (KED) | 0.005 ppb             | 4.6 %             |
| 208Pb (KED) | 0.424 ppb             | 1.3 %             |
| 209Bi (KED) | 94.795 %              | 1.1 %             |
| 232Th (KED) | 0.063 ppb             | 3.5 %             |
| 238U (KED)  | 0.013 ppb             | 4.6 %             |

| Category   | Concentration average | Intensity average | Intensity RSD |
|------------|-----------------------|-------------------|---------------|
| 6Li (KED)  | 109.579 %             | 3,000 cps         | 3.5 %         |
| 9Be (KED)  | 0.014 ppb             | 2 cps             | 86.6 %        |
| 11B (KED)  | -17.076 ppb           | 624 cps           | 11.8 %        |
| 24Mg (KED) | 128.398 ppb           | 75,183 cps        | 0.7 %         |
| 27Al (KED) | 218.617 ppb           | 31,364 cps        | 3.0 %         |

| Category    | Concentration average | Intensity average | Intensity RSD |
|-------------|-----------------------|-------------------|---------------|
| 45Sc (KED)  | 106.481 %             | 53,624 cps        | 0.6 %         |
| 51V (KED)   | 0.388 ppb             | 3,666 cps         | 4.0 %         |
| 52Cr (KED)  | 0.893 ppb             | 13,308 cps        | 1.3 %         |
| 55Mn (KED)  | 6.302 ppb             | 45,825 cps        | 1.4 %         |
| 56Fe (KED)  | 204.759 ppb           | 2,710,114 cps     | 1.6 %         |
| 58Ni (KED)  | 1.302 ppb             | 22,397 cps        | 1.5 %         |
| 59Co (KED)  | 0.106 ppb             | 2,979 cps         | 3.4 %         |
| 63Cu (KED)  | 2.770 ppb             | 58,174 cps        | 1.5 %         |
| 64Zn (KED)  | 52.619 ppb            | 290,864 cps       | 0.8 %         |
| 69Ga (KED)  | 0.812 ppb             | 5,602 cps         | 2.6 %         |
| 75As (KED)  | 0.153 ppb             | 244 cps           | 16.9 %        |
| 80Se (KED)  | -0.286 ppb            | 1,323 cps         | 9.0 %         |
| 85Rb (KED)  | 0.682 ppb             | 4,085 cps         | 3.1 %         |
| 88Sr (KED)  | 1.779 ppb             | 15,020 cps        | 0.3 %         |
| 89Y (KED)   | 101.520 %             | 451,739 cps       | 1.4 %         |
| 107Ag (KED) | 0.046 ppb             | 2,395 cps         | 3.4 %         |
| 114Cd (KED) | 0.013 ppb             | 289 cps           | 15.7 %        |
| 115In (KED) | 96.479 %              | 774,295 cps       | 0.6 %         |
| 133Cs (KED) | 0.041 ppb             | 1,203 cps         | 1.7 %         |
| 138Ba (KED) | 2.503 ppb             | 102,927 cps       | 0.4 %         |
| 139La (KED) | 0.248 ppb             | 21,645 cps        | 1.7 %         |
| 140Ce (KED) | 0.526 ppb             | 61,703 cps        | 4.0 %         |
| 141Pr (KED) | 0.057 ppb             | 6,810 cps         | 1.6 %         |
| 142Nd (KED) | 0.317 ppb             | 15,321 cps        | 2.4 %         |
| 152Sm (KED) | 0.040 ppb             | 1,687 cps         | 5.3 %         |
| 153Eu (KED) | 0.006 ppb             | 520 cps           | 3.3 %         |
| 158Gd (KED) | 0.033 ppb             | 1,885 cps         | 1.8 %         |
| 159Tb (KED) | 99.352 %              | 3,989,056 cps     | 1.3 %         |
| 164Dy (KED) | 0.021 ppb             | 1,313 cps         | 7.1 %         |
| 166Er (KED) | 0.009 ppb             | 1,023 cps         | 7.9 %         |
| 169Tm (KED) | 0.001 ppb             | 360 cps           | 16.1 %        |
| 174Yb (KED) | 0.008 ppb             | 761 cps           | 7.7 %         |
| 175Lu (KED) | -0.006 ppb            | 14,114 cps        | 2.5 %         |
| 205Tl (KED) | 0.005 ppb             | 932 cps           | 3.8 %         |
| 208Pb (KED) | 0.424 ppb             | 58,936 cps        | 2.0 %         |
| 209Bi (KED) | 94.795 %              | 3,239,948 cps     | 1.1 %         |
| 232Th (KED) | 0.063 ppb             | 15,445 cps        | 2.9 %         |
| 238U (KED)  | 0.013 ppb             | 3,765 cps         | 3.5 %         |

## Sample Summary

Instrument ID: iCAP Q

Analysis index: 20

Analysis name: 605207duan jian

Analysis started at: 11/3/2021 3:31:33 PM

User name: WINDOWS-UPCI4ER\Administrator

| Category    | Concentration average | Concentration RSD |
|-------------|-----------------------|-------------------|
| 6Li (KED)   | 112.623 %             | 2.6 %             |
| 9Be (KED)   | 0.021 ppb             | 101.4 %           |
| 11B (KED)   | 58.860 ppb            | 5.2 %             |
| 24Mg (KED)  | 79.724 ppb            | 2.2 %             |
| 27Al (KED)  | 123.112 ppb           | 2.6 %             |
| 45Sc (KED)  | 106.618 %             | 1.1 %             |
| 51V (KED)   | 0.217 ppb             | 5.1 %             |
| 52Cr (KED)  | 0.682 ppb             | 2.0 %             |
| 55Mn (KED)  | 4.714 ppb             | 1.8 %             |
| 56Fe (KED)  | 114.258 ppb           | 1.8 %             |
| 58Ni (KED)  | 0.720 ppb             | 2.9 %             |
| 59Co (KED)  | 0.067 ppb             | 4.0 %             |
| 63Cu (KED)  | 2.564 ppb             | 2.1 %             |
| 64Zn (KED)  | 48.992 ppb            | 0.5 %             |
| 69Ga (KED)  | 0.455 ppb             | 3.9 %             |
| 75As (KED)  | 0.088 ppb             | 10.7 %            |
| 80Se (KED)  | -0.154 ppb            | 110.5 %           |
| 85Rb (KED)  | 0.322 ppb             | 1.2 %             |
| 88Sr (KED)  | 1.328 ppb             | 2.0 %             |
| 89Y (KED)   | 99.000 %              | 1.2 %             |
| 107Ag (KED) | 0.023 ppb             | 3.0 %             |
| 114Cd (KED) | 0.008 ppb             | 16.6 %            |
| 115In (KED) | 93.929 %              | 1.4 %             |
| 133Cs (KED) | 0.031 ppb             | 10.9 %            |
| 138Ba (KED) | 1.402 ppb             | 1.4 %             |
| 139La (KED) | 0.116 ppb             | 0.4 %             |
| 140Ce (KED) | 0.256 ppb             | 2.3 %             |
| 141Pr (KED) | 0.026 ppb             | 4.9 %             |
| 142Nd (KED) | 0.153 ppb             | 6.3 %             |
| 152Sm (KED) | 0.021 ppb             | 8.1 %             |
| 153Eu (KED) | 0.004 ppb             | 12.6 %            |
| 158Gd (KED) | 0.018 ppb             | 7.9 %             |
| 159Tb (KED) | 95.489 %              | 1.1 %             |
| 164Dy (KED) | 0.013 ppb             | 12.5 %            |
| 166Er (KED) | 0.006 ppb             | 9.7 %             |
| 169Tm (KED) | 0.001 ppb             | 8.0 %             |
| 174Yb (KED) | 0.005 ppb             | 2.6 %             |
| 175Lu (KED) | -0.009 ppb            | 20.8 %            |
| 205Tl (KED) | 0.003 ppb             | 8.6 %             |
| 208Pb (KED) | 0.214 ppb             | 5.8 %             |
| 209Bi (KED) | 93.042 %              | 2.1 %             |
| 232Th (KED) | 0.031 ppb             | 3.2 %             |
| 238U (KED)  | 0.008 ppb             | 5.6 %             |

| Category   | Concentration average | Intensity average | Intensity RSD |
|------------|-----------------------|-------------------|---------------|
| 6Li (KED)  | 112.623 %             | 3,084 cps         | 2.6 %         |
| 9Be (KED)  | 0.021 ppb             | 3 cps             | 100.0 %       |
| 11B (KED)  | 58.860 ppb            | 5,751 cps         | 1.6 %         |
| 24Mg (KED) | 79.724 ppb            | 48,117 cps        | 0.5 %         |
| 27Al (KED) | 123.112 ppb           | 17,827 cps        | 1.5 %         |

| Category    | Concentration average | Intensity average | Intensity RSD |
|-------------|-----------------------|-------------------|---------------|
| 45Sc (KED)  | 106.618 %             | 53,693 cps        | 1.1 %         |
| 51V (KED)   | 0.217 ppb             | 2,059 cps         | 4.9 %         |
| 52Cr (KED)  | 0.682 ppb             | 10,209 cps        | 2.2 %         |
| 55Mn (KED)  | 4.714 ppb             | 34,346 cps        | 1.0 %         |
| 56Fe (KED)  | 114.258 ppb           | 1,516,323 cps     | 0.8 %         |
| 58Ni (KED)  | 0.720 ppb             | 12,543 cps        | 2.0 %         |
| 59Co (KED)  | 0.067 ppb             | 1,908 cps         | 4.0 %         |
| 63Cu (KED)  | 2.564 ppb             | 52,593 cps        | 1.0 %         |
| 64Zn (KED)  | 48.992 ppb            | 264,934 cps       | 0.7 %         |
| 69Ga (KED)  | 0.455 ppb             | 3,133 cps         | 3.9 %         |
| 75As (KED)  | 0.088 ppb             | 142 cps           | 9.8 %         |
| 80Se (KED)  | -0.154 ppb            | 1,348 cps         | 6.2 %         |
| 85Rb (KED)  | 0.322 ppb             | 1,891 cps         | 0.7 %         |
| 88Sr (KED)  | 1.328 ppb             | 10,994 cps        | 3.2 %         |
| 89Y (KED)   | 99.000 %              | 440,524 cps       | 1.2 %         |
| 107Ag (KED) | 0.023 ppb             | 1,181 cps         | 3.2 %         |
| 114Cd (KED) | 0.008 ppb             | 198 cps           | 13.5 %        |
| 115In (KED) | 93.929 %              | 753,828 cps       | 1.4 %         |
| 133Cs (KED) | 0.031 ppb             | 901 cps           | 12.0 %        |
| 138Ba (KED) | 1.402 ppb             | 56,919 cps        | 2.4 %         |
| 139La (KED) | 0.116 ppb             | 9,767 cps         | 1.4 %         |
| 140Ce (KED) | 0.256 ppb             | 29,447 cps        | 3.2 %         |
| 141Pr (KED) | 0.026 ppb             | 3,016 cps         | 4.5 %         |
| 142Nd (KED) | 0.153 ppb             | 7,225 cps         | 7.2 %         |
| 152Sm (KED) | 0.021 ppb             | 836 cps           | 7.8 %         |
| 153Eu (KED) | 0.004 ppb             | 361 cps           | 12.2 %        |
| 158Gd (KED) | 0.018 ppb             | 979 cps           | 7.1 %         |
| 159Tb (KED) | 95.489 %              | 3,833,950 cps     | 1.1 %         |
| 164Dy (KED) | 0.013 ppb             | 794 cps           | 11.0 %        |
| 166Er (KED) | 0.006 ppb             | 734 cps           | 5.0 %         |
| 169Tm (KED) | 0.001 ppb             | 188 cps           | 8.2 %         |
| 174Yb (KED) | 0.005 ppb             | 419 cps           | 1.7 %         |
| 175Lu (KED) | -0.009 ppb            | 13,077 cps        | 2.5 %         |
| 205Tl (KED) | 0.003 ppb             | 568 cps           | 10.0 %        |
| 208Pb (KED) | 0.214 ppb             | 33,705 cps        | 2.1 %         |
| 209Bi (KED) | 93.042 %              | 3,180,063 cps     | 2.1 %         |
| 232Th (KED) | 0.031 ppb             | 7,724 cps         | 1.0 %         |
| 238U (KED)  | 0.008 ppb             | 2,171 cps         | 5.0 %         |

## Sample Summary

Instrument ID: iCAP Q

Analysis index: 21

Analysis name: 80171

Analysis started at: 11/3/2021 3:34:49 PM

User name: WINDOWS-UPCI4ER\Administrator

| Category    | Concentration average | Concentration RSD |
|-------------|-----------------------|-------------------|
| 6Li (KED)   | 112.786 %             | 2.1 %             |
| 9Be (KED)   | 0.007 ppb             | 173.2 %           |
| 11B (KED)   | -9.993 ppb            | 7.3 %             |
| 24Mg (KED)  | 92.418 ppb            | 4.6 %             |
| 27Al (KED)  | 106.944 ppb           | 4.1 %             |
| 45Sc (KED)  | 106.385 %             | 0.8 %             |
| 51V (KED)   | 0.217 ppb             | 10.5 %            |
| 52Cr (KED)  | 0.897 ppb             | 1.9 %             |
| 55Mn (KED)  | 3.957 ppb             | 1.5 %             |
| 56Fe (KED)  | 118.047 ppb           | 1.5 %             |
| 58Ni (KED)  | 0.824 ppb             | 2.5 %             |
| 59Co (KED)  | 0.063 ppb             | 1.5 %             |
| 63Cu (KED)  | 2.521 ppb             | 2.6 %             |
| 64Zn (KED)  | 52.220 ppb            | 1.2 %             |
| 69Ga (KED)  | 0.482 ppb             | 2.7 %             |
| 75As (KED)  | 0.105 ppb             | 37.3 %            |
| 80Se (KED)  | -0.078 ppb            | 148.8 %           |
| 85Rb (KED)  | 0.869 ppb             | 2.3 %             |
| 88Sr (KED)  | 1.033 ppb             | 0.8 %             |
| 89Y (KED)   | 98.909 %              | 1.1 %             |
| 107Ag (KED) | 0.022 ppb             | 10.2 %            |
| 114Cd (KED) | 0.012 ppb             | 9.1 %             |
| 115In (KED) | 94.712 %              | 1.0 %             |
| 133Cs (KED) | 0.024 ppb             | 7.3 %             |
| 138Ba (KED) | 1.458 ppb             | 1.1 %             |
| 139La (KED) | 0.115 ppb             | 2.2 %             |
| 140Ce (KED) | 0.283 ppb             | 23.5 %            |
| 141Pr (KED) | 0.027 ppb             | 6.1 %             |
| 142Nd (KED) | 0.146 ppb             | 5.4 %             |
| 152Sm (KED) | 0.019 ppb             | 6.6 %             |
| 153Eu (KED) | 0.004 ppb             | 8.1 %             |
| 158Gd (KED) | 0.017 ppb             | 4.5 %             |
| 159Tb (KED) | 98.385 %              | 0.8 %             |
| 164Dy (KED) | 0.012 ppb             | 9.6 %             |
| 166Er (KED) | 0.003 ppb             | 30.0 %            |
| 169Tm (KED) | 0.001 ppb             | 15.3 %            |
| 174Yb (KED) | 0.004 ppb             | 20.8 %            |
| 175Lu (KED) | -0.011 ppb            | 22.0 %            |
| 205Tl (KED) | 0.003 ppb             | 3.7 %             |
| 208Pb (KED) | 0.203 ppb             | 4.0 %             |
| 209Bi (KED) | 92.570 %              | 0.3 %             |
| 232Th (KED) | 0.032 ppb             | 2.1 %             |
| 238U (KED)  | 0.007 ppb             | 3.7 %             |

| Category   | Concentration average | Intensity average | Intensity RSD |
|------------|-----------------------|-------------------|---------------|
| 6Li (KED)  | 112.786 %             | 3,088 cps         | 2.1 %         |
| 9Be (KED)  | 0.007 ppb             | 1 cps             | 173.2 %       |
| 11B (KED)  | -9.993 ppb            | 1,121 cps         | 5.9 %         |
| 24Mg (KED) | 92.418 ppb            | 55,794 cps        | 2.5 %         |
| 27Al (KED) | 106.944 ppb           | 15,495 cps        | 3.2 %         |

| Category    | Concentration average | Intensity average | Intensity RSD |
|-------------|-----------------------|-------------------|---------------|
| 45Sc (KED)  | 106.385 %             | 53,576 cps        | 0.8 %         |
| 51V (KED)   | 0.217 ppb             | 2,054 cps         | 11.0 %        |
| 52Cr (KED)  | 0.897 ppb             | 13,350 cps        | 1.4 %         |
| 55Mn (KED)  | 3.957 ppb             | 28,781 cps        | 1.1 %         |
| 56Fe (KED)  | 118.047 ppb           | 1,563,108 cps     | 1.1 %         |
| 58Ni (KED)  | 0.824 ppb             | 14,279 cps        | 1.7 %         |
| 59Co (KED)  | 0.063 ppb             | 1,775 cps         | 1.7 %         |
| 63Cu (KED)  | 2.521 ppb             | 51,666 cps        | 1.7 %         |
| 64Zn (KED)  | 52.220 ppb            | 281,340 cps       | 0.1 %         |
| 69Ga (KED)  | 0.482 ppb             | 3,308 cps         | 1.7 %         |
| 75As (KED)  | 0.105 ppb             | 167 cps           | 33.6 %        |
| 80Se (KED)  | -0.078 ppb            | 1,380 cps         | 4.4 %         |
| 85Rb (KED)  | 0.869 ppb             | 5,065 cps         | 2.7 %         |
| 88Sr (KED)  | 1.033 ppb             | 8,589 cps         | 0.4 %         |
| 89Y (KED)   | 98.909 %              | 440,118 cps       | 1.1 %         |
| 107Ag (KED) | 0.022 ppb             | 1,157 cps         | 9.1 %         |
| 114Cd (KED) | 0.012 ppb             | 257 cps           | 8.5 %         |
| 115In (KED) | 94.712 %              | 760,109 cps       | 1.0 %         |
| 133Cs (KED) | 0.024 ppb             | 694 cps           | 6.1 %         |
| 138Ba (KED) | 1.458 ppb             | 60,867 cps        | 1.8 %         |
| 139La (KED) | 0.115 ppb             | 9,967 cps         | 1.8 %         |
| 140Ce (KED) | 0.283 ppb             | 33,461 cps        | 23.6 %        |
| 141Pr (KED) | 0.027 ppb             | 3,188 cps         | 5.4 %         |
| 142Nd (KED) | 0.146 ppb             | 7,125 cps         | 4.4 %         |
| 152Sm (KED) | 0.019 ppb             | 783 cps           | 6.0 %         |
| 153Eu (KED) | 0.004 ppb             | 302 cps           | 8.4 %         |
| 158Gd (KED) | 0.017 ppb             | 970 cps           | 4.2 %         |
| 159Tb (KED) | 98.385 %              | 3,950,224 cps     | 0.8 %         |
| 164Dy (KED) | 0.012 ppb             | 738 cps           | 8.5 %         |
| 166Er (KED) | 0.003 ppb             | 576 cps           | 11.3 %        |
| 169Tm (KED) | 0.001 ppb             | 167 cps           | 14.0 %        |
| 174Yb (KED) | 0.004 ppb             | 370 cps           | 18.6 %        |
| 175Lu (KED) | -0.011 ppb            | 13,289 cps        | 1.8 %         |
| 205Tl (KED) | 0.003 ppb             | 572 cps           | 3.2 %         |
| 208Pb (KED) | 0.203 ppb             | 32,320 cps        | 2.8 %         |
| 209Bi (KED) | 92.570 %              | 3,163,912 cps     | 0.3 %         |
| 232Th (KED) | 0.032 ppb             | 7,760 cps         | 1.8 %         |
| 238U (KED)  | 0.007 ppb             | 2,090 cps         | 3.2 %         |

## Sample Summary

Instrument ID: iCAP Q

Analysis index: 22

Analysis name: 803106chang jian

Analysis started at: 11/3/2021 3:38:03 PM

User name: WINDOWS-UPCI4ER\Administrator

| Category    | Concentration average | Concentration RSD |
|-------------|-----------------------|-------------------|
| 6Li (KED)   | 109.944 %             | 3.1 %             |
| 9Be (KED)   | 0.007 ppb             | 173.2 %           |
| 11B (KED)   | -11.655 ppb           | 12.8 %            |
| 24Mg (KED)  | 91.480 ppb            | 2.8 %             |
| 27Al (KED)  | 138.289 ppb           | 1.4 %             |
| 45Sc (KED)  | 104.422 %             | 0.6 %             |
| 51V (KED)   | 0.250 ppb             | 11.3 %            |
| 52Cr (KED)  | 0.627 ppb             | 1.8 %             |
| 55Mn (KED)  | 4.262 ppb             | 1.1 %             |
| 56Fe (KED)  | 137.224 ppb           | 1.2 %             |
| 58Ni (KED)  | 0.980 ppb             | 3.0 %             |
| 59Co (KED)  | 0.073 ppb             | 6.4 %             |
| 63Cu (KED)  | 2.740 ppb             | 1.2 %             |
| 64Zn (KED)  | 56.610 ppb            | 1.7 %             |
| 69Ga (KED)  | 0.581 ppb             | 1.8 %             |
| 75As (KED)  | 0.118 ppb             | 17.7 %            |
| 80Se (KED)  | -0.103 ppb            | 324.8 %           |
| 85Rb (KED)  | 0.528 ppb             | 1.0 %             |
| 88Sr (KED)  | 1.305 ppb             | 0.8 %             |
| 89Y (KED)   | 97.693 %              | 1.1 %             |
| 107Ag (KED) | 0.022 ppb             | 1.1 %             |
| 114Cd (KED) | 0.013 ppb             | 12.5 %            |
| 115In (KED) | 94.506 %              | 0.8 %             |
| 133Cs (KED) | 0.026 ppb             | 4.6 %             |
| 138Ba (KED) | 1.818 ppb             | 1.7 %             |
| 139La (KED) | 0.138 ppb             | 2.4 %             |
| 140Ce (KED) | 0.281 ppb             | 0.7 %             |
| 141Pr (KED) | 0.033 ppb             | 5.5 %             |
| 142Nd (KED) | 0.174 ppb             | 4.0 %             |
| 152Sm (KED) | 0.023 ppb             | 9.3 %             |
| 153Eu (KED) | 0.004 ppb             | 10.5 %            |
| 158Gd (KED) | 0.020 ppb             | 5.5 %             |
| 159Tb (KED) | 95.789 %              | 0.6 %             |
| 164Dy (KED) | 0.013 ppb             | 6.8 %             |
| 166Er (KED) | 0.004 ppb             | 2.5 %             |
| 169Tm (KED) | 0.001 ppb             | 10.1 %            |
| 174Yb (KED) | 0.005 ppb             | 15.3 %            |
| 175Lu (KED) | -0.007 ppb            | 18.0 %            |
| 205Tl (KED) | 0.004 ppb             | 11.2 %            |
| 208Pb (KED) | 0.233 ppb             | 0.7 %             |
| 209Bi (KED) | 91.087 %              | 1.3 %             |
| 232Th (KED) | 0.041 ppb             | 3.0 %             |
| 238U (KED)  | 0.008 ppb             | 3.5 %             |

| Category   | Concentration average | Intensity average | Intensity RSD |
|------------|-----------------------|-------------------|---------------|
| 6Li (KED)  | 109.944 %             | 3,010 cps         | 3.1 %         |
| 9Be (KED)  | 0.007 ppb             | 1 cps             | 173.2 %       |
| 11B (KED)  | -11.655 ppb           | 984 cps           | 12.2 %        |
| 24Mg (KED) | 91.480 ppb            | 53,843 cps        | 0.5 %         |
| 27Al (KED) | 138.289 ppb           | 19,575 cps        | 1.1 %         |

| Category    | Concentration average | Intensity average | Intensity RSD |
|-------------|-----------------------|-------------------|---------------|
| 45Sc (KED)  | 104.422 %             | 52,587 cps        | 0.6 %         |
| 51V (KED)   | 0.250 ppb             | 2,319 cps         | 11.2 %        |
| 52Cr (KED)  | 0.627 ppb             | 9,202 cps         | 2.3 %         |
| 55Mn (KED)  | 4.262 ppb             | 30,425 cps        | 0.6 %         |
| 56Fe (KED)  | 137.224 ppb           | 1,782,853 cps     | 1.3 %         |
| 58Ni (KED)  | 0.980 ppb             | 16,616 cps        | 2.8 %         |
| 59Co (KED)  | 0.073 ppb             | 2,035 cps         | 6.7 %         |
| 63Cu (KED)  | 2.740 ppb             | 55,400 cps        | 1.5 %         |
| 64Zn (KED)  | 56.610 ppb            | 300,266 cps       | 0.7 %         |
| 69Ga (KED)  | 0.581 ppb             | 3,901 cps         | 1.4 %         |
| 75As (KED)  | 0.118 ppb             | 184 cps           | 16.2 %        |
| 80Se (KED)  | -0.103 ppb            | 1,351 cps         | 9.5 %         |
| 85Rb (KED)  | 0.528 ppb             | 3,051 cps         | 2.0 %         |
| 88Sr (KED)  | 1.305 ppb             | 10,659 cps        | 0.7 %         |
| 89Y (KED)   | 97.693 %              | 434,709 cps       | 1.1 %         |
| 107Ag (KED) | 0.022 ppb             | 1,168 cps         | 1.8 %         |
| 114Cd (KED) | 0.013 ppb             | 282 cps           | 10.3 %        |
| 115In (KED) | 94.506 %              | 758,458 cps       | 0.8 %         |
| 133Cs (KED) | 0.026 ppb             | 772 cps           | 4.4 %         |
| 138Ba (KED) | 1.818 ppb             | 72,999 cps        | 1.1 %         |
| 139La (KED) | 0.138 ppb             | 11,638 cps        | 1.9 %         |
| 140Ce (KED) | 0.281 ppb             | 32,255 cps        | 0.2 %         |
| 141Pr (KED) | 0.033 ppb             | 3,795 cps         | 4.8 %         |
| 142Nd (KED) | 0.174 ppb             | 8,194 cps         | 4.1 %         |
| 152Sm (KED) | 0.023 ppb             | 946 cps           | 9.3 %         |
| 153Eu (KED) | 0.004 ppb             | 371 cps           | 9.9 %         |
| 158Gd (KED) | 0.020 ppb             | 1,093 cps         | 5.3 %         |
| 159Tb (KED) | 95.789 %              | 3,845,986 cps     | 0.6 %         |
| 164Dy (KED) | 0.013 ppb             | 833 cps           | 6.3 %         |
| 166Er (KED) | 0.004 ppb             | 646 cps           | 0.8 %         |
| 169Tm (KED) | 0.001 ppb             | 209 cps           | 9.1 %         |
| 174Yb (KED) | 0.005 ppb             | 486 cps           | 14.0 %        |
| 175Lu (KED) | -0.007 ppb            | 13,424 cps        | 1.9 %         |
| 205Tl (KED) | 0.004 ppb             | 712 cps           | 11.7 %        |
| 208Pb (KED) | 0.233 ppb             | 35,116 cps        | 0.8 %         |
| 209Bi (KED) | 91.087 %              | 3,113,212 cps     | 1.3 %         |
| 232Th (KED) | 0.041 ppb             | 9,798 cps         | 1.9 %         |
| 238U (KED)  | 0.008 ppb             | 2,289 cps         | 3.3 %         |

## Sample Summary

Instrument ID: iCAP Q

Analysis index: 23

Analysis name: 80110

Analysis started at: 11/3/2021 3:41:14 PM

User name: WINDOWS-UPCI4ER\Administrator

| Category    | Concentration average | Concentration RSD |
|-------------|-----------------------|-------------------|
| 6Li (KED)   | 112.258 %             | 1.6 %             |
| 9Be (KED)   | 0.000 ppb             |                   |
| 11B (KED)   | -1.327 ppb            | 99.8 %            |
| 24Mg (KED)  | 71.858 ppb            | 1.8 %             |
| 27Al (KED)  | 113.821 ppb           | 0.9 %             |
| 45Sc (KED)  | 106.432 %             | 1.8 %             |
| 51V (KED)   | 0.225 ppb             | 7.2 %             |
| 52Cr (KED)  | 0.690 ppb             | 3.6 %             |
| 55Mn (KED)  | 3.860 ppb             | 1.7 %             |
| 56Fe (KED)  | 107.293 ppb           | 1.9 %             |
| 58Ni (KED)  | 0.883 ppb             | 3.7 %             |
| 59Co (KED)  | 0.056 ppb             | 5.9 %             |
| 63Cu (KED)  | 2.398 ppb             | 0.7 %             |
| 64Zn (KED)  | 51.592 ppb            | 0.2 %             |
| 69Ga (KED)  | 0.475 ppb             | 3.6 %             |
| 75As (KED)  | 0.105 ppb             | 3.5 %             |
| 80Se (KED)  | -0.188 ppb            | 92.9 %            |
| 85Rb (KED)  | 0.651 ppb             | 3.9 %             |
| 88Sr (KED)  | 0.932 ppb             | 3.3 %             |
| 89Y (KED)   | 99.739 %              | 1.3 %             |
| 107Ag (KED) | 0.010 ppb             | 3.2 %             |
| 114Cd (KED) | 0.014 ppb             | 19.5 %            |
| 115In (KED) | 94.979 %              | 1.6 %             |
| 133Cs (KED) | 0.022 ppb             | 12.6 %            |
| 138Ba (KED) | 1.420 ppb             | 6.6 %             |
| 139La (KED) | 0.103 ppb             | 2.0 %             |
| 140Ce (KED) | 0.216 ppb             | 4.3 %             |
| 141Pr (KED) | 0.024 ppb             | 6.9 %             |
| 142Nd (KED) | 0.132 ppb             | 3.1 %             |
| 152Sm (KED) | 0.017 ppb             | 11.7 %            |
| 153Eu (KED) | 0.003 ppb             | 8.5 %             |
| 158Gd (KED) | 0.014 ppb             | 1.7 %             |
| 159Tb (KED) | 97.882 %              | 3.5 %             |
| 164Dy (KED) | 0.010 ppb             | 8.9 %             |
| 166Er (KED) | 0.003 ppb             | 26.8 %            |
| 169Tm (KED) | 0.001 ppb             | 11.0 %            |
| 174Yb (KED) | 0.004 ppb             | 5.5 %             |
| 175Lu (KED) | -0.009 ppb            | 39.7 %            |
| 205Tl (KED) | 0.003 ppb             | 5.6 %             |
| 208Pb (KED) | 0.256 ppb             | 0.8 %             |
| 209Bi (KED) | 93.301 %              | 0.4 %             |
| 232Th (KED) | 0.029 ppb             | 1.7 %             |
| 238U (KED)  | 0.007 ppb             | 5.6 %             |

| Category   | Concentration average | Intensity average | Intensity RSD |
|------------|-----------------------|-------------------|---------------|
| 6Li (KED)  | 112.258 %             | 3,074 cps         | 1.6 %         |
| 9Be (KED)  | 0.000 ppb             | 0 cps             |               |
| 11B (KED)  | -1.327 ppb            | 1,697 cps         | 5.0 %         |
| 24Mg (KED) | 71.858 ppb            | 43,270 cps        | 1.0 %         |
| 27Al (KED) | 113.821 ppb           | 16,480 cps        | 1.3 %         |

| Category    | Concentration average | Intensity average | Intensity RSD |
|-------------|-----------------------|-------------------|---------------|
| 45Sc (KED)  | 106.432 %             | 53,599 cps        | 1.8 %         |
| 51V (KED)   | 0.225 ppb             | 2,134 cps         | 5.5 %         |
| 52Cr (KED)  | 0.690 ppb             | 10,302 cps        | 2.2 %         |
| 55Mn (KED)  | 3.860 ppb             | 28,087 cps        | 0.1 %         |
| 56Fe (KED)  | 107.293 ppb           | 1,421,537 cps     | 0.3 %         |
| 58Ni (KED)  | 0.883 ppb             | 15,289 cps        | 1.9 %         |
| 59Co (KED)  | 0.056 ppb             | 1,588 cps         | 4.4 %         |
| 63Cu (KED)  | 2.398 ppb             | 49,616 cps        | 0.7 %         |
| 64Zn (KED)  | 51.592 ppb            | 280,453 cps       | 1.2 %         |
| 69Ga (KED)  | 0.475 ppb             | 3,287 cps         | 2.2 %         |
| 75As (KED)  | 0.105 ppb             | 169 cps           | 2.3 %         |
| 80Se (KED)  | -0.188 ppb            | 1,343 cps         | 7.0 %         |
| 85Rb (KED)  | 0.651 ppb             | 3,831 cps         | 3.4 %         |
| 88Sr (KED)  | 0.932 ppb             | 7,828 cps         | 3.2 %         |
| 89Y (KED)   | 99.739 %              | 443,814 cps       | 1.3 %         |
| 107Ag (KED) | 0.010 ppb             | 553 cps           | 4.3 %         |
| 114Cd (KED) | 0.014 ppb             | 294 cps           | 17.2 %        |
| 115In (KED) | 94.979 %              | 762,258 cps       | 1.6 %         |
| 133Cs (KED) | 0.022 ppb             | 656 cps           | 13.5 %        |
| 138Ba (KED) | 1.420 ppb             | 58,973 cps        | 4.2 %         |
| 139La (KED) | 0.103 ppb             | 8,899 cps         | 1.6 %         |
| 140Ce (KED) | 0.216 ppb             | 25,599 cps        | 1.3 %         |
| 141Pr (KED) | 0.024 ppb             | 2,781 cps         | 3.4 %         |
| 142Nd (KED) | 0.132 ppb             | 6,439 cps         | 4.1 %         |
| 152Sm (KED) | 0.017 ppb             | 712 cps           | 9.8 %         |
| 153Eu (KED) | 0.003 ppb             | 251 cps           | 5.0 %         |
| 158Gd (KED) | 0.014 ppb             | 817 cps           | 1.8 %         |
| 159Tb (KED) | 97.882 %              | 3,930,036 cps     | 3.5 %         |
| 164Dy (KED) | 0.010 ppb             | 671 cps           | 10.7 %        |
| 166Er (KED) | 0.003 ppb             | 584 cps           | 8.7 %         |
| 169Tm (KED) | 0.001 ppb             | 160 cps           | 7.5 %         |
| 174Yb (KED) | 0.004 ppb             | 353 cps           | 8.2 %         |
| 175Lu (KED) | -0.009 ppb            | 13,501 cps        | 1.1 %         |
| 205Tl (KED) | 0.003 ppb             | 563 cps           | 5.3 %         |
| 208Pb (KED) | 0.256 ppb             | 38,584 cps        | 1.0 %         |
| 209Bi (KED) | 93.301 %              | 3,188,888 cps     | 0.4 %         |
| 232Th (KED) | 0.029 ppb             | 7,139 cps         | 1.4 %         |
| 238U (KED)  | 0.007 ppb             | 1,910 cps         | 5.2 %         |

## Sample Summary

Instrument ID: iCAP Q

Analysis index: 24

Analysis name: 503149chang jian

Analysis started at: 11/3/2021 3:44:29 PM

User name: WINDOWS-UPCI4ER\Administrator

| Category    | Concentration average | Concentration RSD |
|-------------|-----------------------|-------------------|
| 6Li (KED)   | 110.188 %             | 3.8 %             |
| 9Be (KED)   | 0.000 ppb             |                   |
| 11B (KED)   | -7.880 ppb            | 15.3 %            |
| 24Mg (KED)  | 64.804 ppb            | 5.3 %             |
| 27Al (KED)  | 127.977 ppb           | 1.3 %             |
| 45Sc (KED)  | 103.851 %             | 1.9 %             |
| 51V (KED)   | 0.222 ppb             | 4.7 %             |
| 52Cr (KED)  | 0.580 ppb             | 1.5 %             |
| 55Mn (KED)  | 3.971 ppb             | 1.7 %             |
| 56Fe (KED)  | 123.792 ppb           | 0.5 %             |
| 58Ni (KED)  | 0.735 ppb             | 1.5 %             |
| 59Co (KED)  | 0.063 ppb             | 2.4 %             |
| 63Cu (KED)  | 2.666 ppb             | 0.6 %             |
| 64Zn (KED)  | 55.575 ppb            | 1.6 %             |
| 69Ga (KED)  | 0.543 ppb             | 1.2 %             |
| 75As (KED)  | 0.097 ppb             | 22.6 %            |
| 80Se (KED)  | -0.094 ppb            | 41.3 %            |
| 85Rb (KED)  | 0.359 ppb             | 7.1 %             |
| 88Sr (KED)  | 0.946 ppb             | 1.6 %             |
| 89Y (KED)   | 95.666 %              | 0.7 %             |
| 107Ag (KED) | 0.027 ppb             | 4.5 %             |
| 114Cd (KED) | 0.008 ppb             | 13.1 %            |
| 115In (KED) | 93.995 %              | 2.0 %             |
| 133Cs (KED) | 0.021 ppb             | 1.9 %             |
| 138Ba (KED) | 1.638 ppb             | 0.8 %             |
| 139La (KED) | 0.111 ppb             | 4.0 %             |
| 140Ce (KED) | 0.234 ppb             | 3.2 %             |
| 141Pr (KED) | 0.026 ppb             | 3.1 %             |
| 142Nd (KED) | 0.142 ppb             | 2.5 %             |
| 152Sm (KED) | 0.018 ppb             | 6.5 %             |
| 153Eu (KED) | 0.004 ppb             | 24.3 %            |
| 158Gd (KED) | 0.016 ppb             | 6.4 %             |
| 159Tb (KED) | 97.013 %              | 1.0 %             |
| 164Dy (KED) | 0.012 ppb             | 2.7 %             |
| 166Er (KED) | 0.003 ppb             | 20.1 %            |
| 169Tm (KED) | 0.001 ppb             | 7.0 %             |
| 174Yb (KED) | 0.005 ppb             | 2.9 %             |
| 175Lu (KED) | -0.010 ppb            | 7.8 %             |
| 205Tl (KED) | 0.003 ppb             | 10.1 %            |
| 208Pb (KED) | 0.243 ppb             | 3.6 %             |
| 209Bi (KED) | 92.841 %              | 1.6 %             |
| 232Th (KED) | 0.032 ppb             | 3.8 %             |
| 238U (KED)  | 0.010 ppb             | 4.0 %             |

| Category   | Concentration average | Intensity average | Intensity RSD |
|------------|-----------------------|-------------------|---------------|
| 6Li (KED)  | 110.188 %             | 3,017 cps         | 3.8 %         |
| 9Be (KED)  | 0.000 ppb             | 0 cps             |               |
| 11B (KED)  | -7.880 ppb            | 1,232 cps         | 3.4 %         |
| 24Mg (KED) | 64.804 ppb            | 38,290 cps        | 1.7 %         |
| 27Al (KED) | 127.977 ppb           | 18,039 cps        | 1.0 %         |

| Category    | Concentration average | Intensity average | Intensity RSD |
|-------------|-----------------------|-------------------|---------------|
| 45Sc (KED)  | 103.851 %             | 52,299 cps        | 1.9 %         |
| 51V (KED)   | 0.222 ppb             | 2,057 cps         | 4.4 %         |
| 52Cr (KED)  | 0.580 ppb             | 8,465 cps         | 1.3 %         |
| 55Mn (KED)  | 3.971 ppb             | 28,192 cps        | 0.1 %         |
| 56Fe (KED)  | 123.792 ppb           | 1,599,889 cps     | 1.4 %         |
| 58Ni (KED)  | 0.735 ppb             | 12,471 cps        | 3.3 %         |
| 59Co (KED)  | 0.063 ppb             | 1,730 cps         | 2.4 %         |
| 63Cu (KED)  | 2.666 ppb             | 52,796 cps        | 0.5 %         |
| 64Zn (KED)  | 55.575 ppb            | 288,881 cps       | 1.1 %         |
| 69Ga (KED)  | 0.543 ppb             | 3,586 cps         | 1.7 %         |
| 75As (KED)  | 0.097 ppb             | 150 cps           | 21.2 %        |
| 80Se (KED)  | -0.094 ppb            | 1,328 cps         | 0.8 %         |
| 85Rb (KED)  | 0.359 ppb             | 2,035 cps         | 7.8 %         |
| 88Sr (KED)  | 0.946 ppb             | 7,618 cps         | 0.9 %         |
| 89Y (KED)   | 95.666 %              | 425,690 cps       | 0.7 %         |
| 107Ag (KED) | 0.027 ppb             | 1,406 cps         | 2.6 %         |
| 114Cd (KED) | 0.008 ppb             | 197 cps           | 10.3 %        |
| 115In (KED) | 93.995 %              | 754,358 cps       | 2.0 %         |
| 133Cs (KED) | 0.021 ppb             | 631 cps           | 3.6 %         |
| 138Ba (KED) | 1.638 ppb             | 66,960 cps        | 1.3 %         |
| 139La (KED) | 0.111 ppb             | 9,535 cps         | 3.1 %         |
| 140Ce (KED) | 0.234 ppb             | 27,409 cps        | 3.0 %         |
| 141Pr (KED) | 0.026 ppb             | 3,046 cps         | 2.2 %         |
| 142Nd (KED) | 0.142 ppb             | 6,817 cps         | 1.7 %         |
| 152Sm (KED) | 0.018 ppb             | 743 cps           | 6.6 %         |
| 153Eu (KED) | 0.004 ppb             | 321 cps           | 23.1 %        |
| 158Gd (KED) | 0.016 ppb             | 896 cps           | 6.7 %         |
| 159Tb (KED) | 97.013 %              | 3,895,145 cps     | 1.0 %         |
| 164Dy (KED) | 0.012 ppb             | 781 cps           | 3.6 %         |
| 166Er (KED) | 0.003 ppb             | 566 cps           | 8.9 %         |
| 169Tm (KED) | 0.001 ppb             | 179 cps           | 5.7 %         |
| 174Yb (KED) | 0.005 ppb             | 431 cps           | 1.9 %         |
| 175Lu (KED) | -0.010 ppb            | 13,143 cps        | 1.6 %         |
| 205Tl (KED) | 0.003 ppb             | 596 cps           | 8.2 %         |
| 208Pb (KED) | 0.243 ppb             | 36,994 cps        | 2.4 %         |
| 209Bi (KED) | 92.841 %              | 3,173,193 cps     | 1.6 %         |
| 232Th (KED) | 0.032 ppb             | 7,926 cps         | 2.2 %         |
| 238U (KED)  | 0.010 ppb             | 2,756 cps         | 4.9 %         |

## Sample Summary

Instrument ID: iCAP Q

Analysis index: 25

Analysis name: 80016jian

Analysis started at: 11/3/2021 3:47:43 PM

User name: WINDOWS-UPCI4ER\Administrator

| Category    | Concentration average | Concentration RSD |
|-------------|-----------------------|-------------------|
| 6Li (KED)   | 105.723 %             | 4.5 %             |
| 9Be (KED)   | 0.015 ppb             | 86.9 %            |
| 11B (KED)   | -12.566 ppb           | 0.6 %             |
| 24Mg (KED)  | 87.548 ppb            | 4.6 %             |
| 27Al (KED)  | 123.902 ppb           | 3.3 %             |
| 45Sc (KED)  | 101.914 %             | 0.5 %             |
| 51V (KED)   | 0.242 ppb             | 3.8 %             |
| 52Cr (KED)  | 0.900 ppb             | 0.8 %             |
| 55Mn (KED)  | 4.685 ppb             | 1.5 %             |
| 56Fe (KED)  | 153.441 ppb           | 1.4 %             |
| 58Ni (KED)  | 0.958 ppb             | 3.4 %             |
| 59Co (KED)  | 0.075 ppb             | 1.9 %             |
| 63Cu (KED)  | 2.808 ppb             | 2.1 %             |
| 64Zn (KED)  | 65.504 ppb            | 1.5 %             |
| 69Ga (KED)  | 0.555 ppb             | 4.4 %             |
| 75As (KED)  | 0.129 ppb             | 4.0 %             |
| 80Se (KED)  | -0.167 ppb            | 39.4 %            |
| 85Rb (KED)  | 0.802 ppb             | 2.9 %             |
| 88Sr (KED)  | 1.575 ppb             | 1.1 %             |
| 89Y (KED)   | 95.513 %              | 1.4 %             |
| 107Ag (KED) | 0.028 ppb             | 1.9 %             |
| 114Cd (KED) | 0.018 ppb             | 11.7 %            |
| 115In (KED) | 92.338 %              | 1.5 %             |
| 133Cs (KED) | 0.023 ppb             | 6.4 %             |
| 138Ba (KED) | 1.721 ppb             | 1.0 %             |
| 139La (KED) | 0.113 ppb             | 1.9 %             |
| 140Ce (KED) | 0.256 ppb             | 3.3 %             |
| 141Pr (KED) | 0.028 ppb             | 2.8 %             |
| 142Nd (KED) | 0.153 ppb             | 5.4 %             |
| 152Sm (KED) | 0.020 ppb             | 9.2 %             |
| 153Eu (KED) | 0.004 ppb             | 8.2 %             |
| 158Gd (KED) | 0.017 ppb             | 1.1 %             |
| 159Tb (KED) | 95.000 %              | 0.9 %             |
| 164Dy (KED) | 0.012 ppb             | 9.8 %             |
| 166Er (KED) | 0.005 ppb             | 30.1 %            |
| 169Tm (KED) | 0.001 ppb             | 11.2 %            |
| 174Yb (KED) | 0.005 ppb             | 5.4 %             |
| 175Lu (KED) | -0.009 ppb            | 14.0 %            |
| 205Tl (KED) | 0.003 ppb             | 11.4 %            |
| 208Pb (KED) | 0.274 ppb             | 3.3 %             |
| 209Bi (KED) | 93.428 %              | 0.9 %             |
| 232Th (KED) | 0.031 ppb             | 2.5 %             |
| 238U (KED)  | 0.008 ppb             | 3.8 %             |

| Category   | Concentration average | Intensity average | Intensity RSD |
|------------|-----------------------|-------------------|---------------|
| 6Li (KED)  | 105.723 %             | 2,895 cps         | 4.5 %         |
| 9Be (KED)  | 0.015 ppb             | 2 cps             | 86.6 %        |
| 11B (KED)  | -12.566 ppb           | 888 cps           | 4.0 %         |
| 24Mg (KED) | 87.548 ppb            | 49,524 cps        | 0.1 %         |
| 27Al (KED) | 123.902 ppb           | 17,150 cps        | 2.9 %         |

| Category    | Concentration average | Intensity average | Intensity RSD |
|-------------|-----------------------|-------------------|---------------|
| 45Sc (KED)  | 101.914 %             | 51,324 cps        | 0.5 %         |
| 51V (KED)   | 0.242 ppb             | 2,198 cps         | 4.3 %         |
| 52Cr (KED)  | 0.900 ppb             | 12,829 cps        | 1.1 %         |
| 55Mn (KED)  | 4.685 ppb             | 32,636 cps        | 2.0 %         |
| 56Fe (KED)  | 153.441 ppb           | 1,945,142 cps     | 1.7 %         |
| 58Ni (KED)  | 0.958 ppb             | 15,853 cps        | 3.4 %         |
| 59Co (KED)  | 0.075 ppb             | 2,026 cps         | 2.0 %         |
| 63Cu (KED)  | 2.808 ppb             | 55,463 cps        | 1.3 %         |
| 64Zn (KED)  | 65.504 ppb            | 337,900 cps       | 0.7 %         |
| 69Ga (KED)  | 0.555 ppb             | 3,654 cps         | 5.3 %         |
| 75As (KED)  | 0.129 ppb             | 197 cps           | 2.9 %         |
| 80Se (KED)  | -0.167 ppb            | 1,295 cps         | 0.7 %         |
| 85Rb (KED)  | 0.802 ppb             | 4,515 cps         | 1.6 %         |
| 88Sr (KED)  | 1.575 ppb             | 12,537 cps        | 1.6 %         |
| 89Y (KED)   | 95.513 %              | 425,009 cps       | 1.4 %         |
| 107Ag (KED) | 0.028 ppb             | 1,400 cps         | 1.6 %         |
| 114Cd (KED) | 0.018 ppb             | 374 cps           | 8.9 %         |
| 115In (KED) | 92.338 %              | 741,064 cps       | 1.5 %         |
| 133Cs (KED) | 0.023 ppb             | 674 cps           | 7.6 %         |
| 138Ba (KED) | 1.721 ppb             | 68,729 cps        | 0.7 %         |
| 139La (KED) | 0.113 ppb             | 9,517 cps         | 1.0 %         |
| 140Ce (KED) | 0.256 ppb             | 29,241 cps        | 2.4 %         |
| 141Pr (KED) | 0.028 ppb             | 3,232 cps         | 1.9 %         |
| 142Nd (KED) | 0.153 ppb             | 7,170 cps         | 4.9 %         |
| 152Sm (KED) | 0.020 ppb             | 799 cps           | 9.8 %         |
| 153Eu (KED) | 0.004 ppb             | 291 cps           | 8.7 %         |
| 158Gd (KED) | 0.017 ppb             | 960 cps           | 1.2 %         |
| 159Tb (KED) | 95.000 %              | 3,814,336 cps     | 0.9 %         |
| 164Dy (KED) | 0.012 ppb             | 761 cps           | 9.4 %         |
| 166Er (KED) | 0.005 ppb             | 692 cps           | 15.4 %        |
| 169Tm (KED) | 0.001 ppb             | 172 cps           | 10.7 %        |
| 174Yb (KED) | 0.005 ppb             | 440 cps           | 4.2 %         |
| 175Lu (KED) | -0.009 ppb            | 13,109 cps        | 1.0 %         |
| 205Tl (KED) | 0.003 ppb             | 583 cps           | 9.7 %         |
| 208Pb (KED) | 0.274 ppb             | 40,736 cps        | 1.7 %         |
| 209Bi (KED) | 93.428 %              | 3,193,224 cps     | 0.9 %         |
| 232Th (KED) | 0.031 ppb             | 7,750 cps         | 1.7 %         |
| 238U (KED)  | 0.008 ppb             | 2,336 cps         | 2.7 %         |

## Sample Summary

Instrument ID: iCAP Q

Analysis index: 26

Analysis name: 80004jian

Analysis started at: 11/3/2021 3:50:54 PM

User name: WINDOWS-UPCI4ER\Administrator

| Category    | Concentration average | Concentration RSD |
|-------------|-----------------------|-------------------|
| 6Li (KED)   | 107.509 %             | 3.7 %             |
| 9Be (KED)   | 0.007 ppb             | 173.2 %           |
| 11B (KED)   | 18.649 ppb            | 3.5 %             |
| 24Mg (KED)  | 69.915 ppb            | 4.9 %             |
| 27Al (KED)  | 94.089 ppb            | 3.4 %             |
| 45Sc (KED)  | 103.622 %             | 1.0 %             |
| 51V (KED)   | 0.174 ppb             | 2.4 %             |
| 52Cr (KED)  | 0.590 ppb             | 4.2 %             |
| 55Mn (KED)  | 3.512 ppb             | 1.7 %             |
| 56Fe (KED)  | 104.279 ppb           | 0.6 %             |
| 58Ni (KED)  | 0.817 ppb             | 1.4 %             |
| 59Co (KED)  | 0.061 ppb             | 1.5 %             |
| 63Cu (KED)  | 2.479 ppb             | 0.2 %             |
| 64Zn (KED)  | 52.064 ppb            | 1.2 %             |
| 69Ga (KED)  | 0.418 ppb             | 1.7 %             |
| 75As (KED)  | 0.079 ppb             | 13.3 %            |
| 80Se (KED)  | -0.096 ppb            | 121.6 %           |
| 85Rb (KED)  | 0.738 ppb             | 3.8 %             |
| 88Sr (KED)  | 1.236 ppb             | 2.6 %             |
| 89Y (KED)   | 97.817 %              | 0.2 %             |
| 107Ag (KED) | 0.017 ppb             | 4.3 %             |
| 114Cd (KED) | 0.017 ppb             | 7.0 %             |
| 115In (KED) | 94.212 %              | 1.0 %             |
| 133Cs (KED) | 0.017 ppb             | 9.3 %             |
| 138Ba (KED) | 1.375 ppb             | 1.3 %             |
| 139La (KED) | 0.084 ppb             | 1.2 %             |
| 140Ce (KED) | 0.179 ppb             | 3.8 %             |
| 141Pr (KED) | 0.019 ppb             | 3.7 %             |
| 142Nd (KED) | 0.113 ppb             | 1.4 %             |
| 152Sm (KED) | 0.015 ppb             | 7.4 %             |
| 153Eu (KED) | 0.003 ppb             | 11.2 %            |
| 158Gd (KED) | 0.013 ppb             | 1.6 %             |
| 159Tb (KED) | 96.646 %              | 1.2 %             |
| 164Dy (KED) | 0.009 ppb             | 1.7 %             |
| 166Er (KED) | 0.003 ppb             | 11.5 %            |
| 169Tm (KED) | 0.001 ppb             | 18.2 %            |
| 174Yb (KED) | 0.003 ppb             | 18.5 %            |
| 175Lu (KED) | -0.009 ppb            | 39.5 %            |
| 205Tl (KED) | 0.003 ppb             | 12.5 %            |
| 208Pb (KED) | 0.171 ppb             | 1.7 %             |
| 209Bi (KED) | 93.117 %              | 2.2 %             |
| 232Th (KED) | 0.023 ppb             | 0.8 %             |
| 238U (KED)  | 0.006 ppb             | 6.2 %             |

| Category   | Concentration average | Intensity average | Intensity RSD |
|------------|-----------------------|-------------------|---------------|
| 6Li (KED)  | 107.509 %             | 2,944 cps         | 3.7 %         |
| 9Be (KED)  | 0.007 ppb             | 1 cps             | 173.2 %       |
| 11B (KED)  | 18.649 ppb            | 2,909 cps         | 4.2 %         |
| 24Mg (KED) | 69.915 ppb            | 40,288 cps        | 1.7 %         |
| 27Al (KED) | 94.089 ppb            | 13,317 cps        | 2.4 %         |

| Category    | Concentration average | Intensity average | Intensity RSD |
|-------------|-----------------------|-------------------|---------------|
| 45Sc (KED)  | 103.622 %             | 52,184 cps        | 1.0 %         |
| 51V (KED)   | 0.174 ppb             | 1,608 cps         | 2.5 %         |
| 52Cr (KED)  | 0.590 ppb             | 8,596 cps         | 3.5 %         |
| 55Mn (KED)  | 3.512 ppb             | 24,892 cps        | 1.7 %         |
| 56Fe (KED)  | 104.279 ppb           | 1,345,534 cps     | 0.5 %         |
| 58Ni (KED)  | 0.817 ppb             | 13,800 cps        | 1.2 %         |
| 59Co (KED)  | 0.061 ppb             | 1,685 cps         | 2.2 %         |
| 63Cu (KED)  | 2.479 ppb             | 50,275 cps        | 0.1 %         |
| 64Zn (KED)  | 52.064 ppb            | 277,466 cps       | 1.4 %         |
| 69Ga (KED)  | 0.418 ppb             | 2,860 cps         | 1.7 %         |
| 75As (KED)  | 0.079 ppb             | 128 cps           | 12.0 %        |
| 80Se (KED)  | -0.096 ppb            | 1,357 cps         | 3.9 %         |
| 85Rb (KED)  | 0.738 ppb             | 4,256 cps         | 3.8 %         |
| 88Sr (KED)  | 1.236 ppb             | 10,120 cps        | 2.7 %         |
| 89Y (KED)   | 97.817 %              | 435,257 cps       | 0.2 %         |
| 107Ag (KED) | 0.017 ppb             | 872 cps           | 4.5 %         |
| 114Cd (KED) | 0.017 ppb             | 361 cps           | 5.3 %         |
| 115In (KED) | 94.212 %              | 756,098 cps       | 1.0 %         |
| 133Cs (KED) | 0.017 ppb             | 506 cps           | 7.9 %         |
| 138Ba (KED) | 1.375 ppb             | 56,558 cps        | 1.5 %         |
| 139La (KED) | 0.084 ppb             | 7,213 cps         | 1.8 %         |
| 140Ce (KED) | 0.179 ppb             | 21,195 cps        | 2.8 %         |
| 141Pr (KED) | 0.019 ppb             | 2,247 cps         | 4.8 %         |
| 142Nd (KED) | 0.113 ppb             | 5,453 cps         | 2.4 %         |
| 152Sm (KED) | 0.015 ppb             | 630 cps           | 8.5 %         |
| 153Eu (KED) | 0.003 ppb             | 261 cps           | 11.9 %        |
| 158Gd (KED) | 0.013 ppb             | 737 cps           | 1.2 %         |
| 159Tb (KED) | 96.646 %              | 3,880,397 cps     | 1.2 %         |
| 164Dy (KED) | 0.009 ppb             | 581 cps           | 2.0 %         |
| 166Er (KED) | 0.003 ppb             | 556 cps           | 4.6 %         |
| 169Tm (KED) | 0.001 ppb             | 146 cps           | 18.4 %        |
| 174Yb (KED) | 0.003 ppb             | 300 cps           | 15.8 %        |
| 175Lu (KED) | -0.009 ppb            | 13,232 cps        | 3.6 %         |
| 205Tl (KED) | 0.003 ppb             | 487 cps           | 9.7 %         |
| 208Pb (KED) | 0.171 ppb             | 28,810 cps        | 1.1 %         |
| 209Bi (KED) | 93.117 %              | 3,182,619 cps     | 2.2 %         |
| 232Th (KED) | 0.023 ppb             | 5,648 cps         | 1.5 %         |
| 238U (KED)  | 0.006 ppb             | 1,677 cps         | 5.6 %         |

## Sample Summary

Instrument ID: iCAP Q

Analysis index: 27

Analysis name: 80130jian

Analysis started at: 11/3/2021 3:54:06 PM

User name: WINDOWS-UPCI4ER\Administrator

| Category    | Concentration average | Concentration RSD |
|-------------|-----------------------|-------------------|
| 6Li (KED)   | 110.228 %             | 3.7 %             |
| 9Be (KED)   | 0.014 ppb             | 86.6 %            |
| 11B (KED)   | 27.744 ppb            | 6.7 %             |
| 24Mg (KED)  | 63.143 ppb            | 2.2 %             |
| 27Al (KED)  | 75.349 ppb            | 1.3 %             |
| 45Sc (KED)  | 104.491 %             | 0.9 %             |
| 51V (KED)   | 0.146 ppb             | 7.5 %             |
| 52Cr (KED)  | 0.533 ppb             | 1.9 %             |
| 55Mn (KED)  | 2.724 ppb             | 2.2 %             |
| 56Fe (KED)  | 100.806 ppb           | 0.5 %             |
| 58Ni (KED)  | 0.689 ppb             | 1.1 %             |
| 59Co (KED)  | 0.040 ppb             | 6.9 %             |
| 63Cu (KED)  | 2.444 ppb             | 1.4 %             |
| 64Zn (KED)  | 47.150 ppb            | 1.7 %             |
| 69Ga (KED)  | 0.368 ppb             | 3.4 %             |
| 75As (KED)  | 0.078 ppb             | 26.4 %            |
| 80Se (KED)  | 0.041 ppb             | 765.2 %           |
| 85Rb (KED)  | 0.780 ppb             | 0.5 %             |
| 88Sr (KED)  | 0.948 ppb             | 1.8 %             |
| 89Y (KED)   | 97.829 %              | 1.4 %             |
| 107Ag (KED) | 0.023 ppb             | 10.0 %            |
| 114Cd (KED) | 0.009 ppb             | 24.7 %            |
| 115In (KED) | 92.747 %              | 0.7 %             |
| 133Cs (KED) | 0.015 ppb             | 1.1 %             |
| 138Ba (KED) | 1.203 ppb             | 2.7 %             |
| 139La (KED) | 0.068 ppb             | 1.3 %             |
| 140Ce (KED) | 0.139 ppb             | 1.9 %             |
| 141Pr (KED) | 0.016 ppb             | 1.9 %             |
| 142Nd (KED) | 0.086 ppb             | 8.4 %             |
| 152Sm (KED) | 0.011 ppb             | 17.5 %            |
| 153Eu (KED) | 0.002 ppb             | 33.3 %            |
| 158Gd (KED) | 0.010 ppb             | 2.0 %             |
| 159Tb (KED) | 98.654 %              | 1.2 %             |
| 164Dy (KED) | 0.007 ppb             | 6.7 %             |
| 166Er (KED) | 0.001 ppb             | 26.8 %            |
| 169Tm (KED) | 0.001 ppb             | 17.4 %            |
| 174Yb (KED) | 0.003 ppb             | 19.6 %            |
| 175Lu (KED) | -0.013 ppb            | 11.4 %            |
| 205Tl (KED) | 0.003 ppb             | 5.0 %             |
| 208Pb (KED) | 0.194 ppb             | 2.8 %             |
| 209Bi (KED) | 93.028 %              | 0.7 %             |
| 232Th (KED) | 0.019 ppb             | 2.9 %             |
| 238U (KED)  | 0.005 ppb             | 3.0 %             |

| Category   | Concentration average | Intensity average | Intensity RSD |
|------------|-----------------------|-------------------|---------------|
| 6Li (KED)  | 110.228 %             | 3,018 cps         | 3.7 %         |
| 9Be (KED)  | 0.014 ppb             | 2 cps             | 86.6 %        |
| 11B (KED)  | 27.744 ppb            | 3,581 cps         | 3.6 %         |
| 24Mg (KED) | 63.143 ppb            | 37,365 cps        | 2.6 %         |
| 27Al (KED) | 75.349 ppb            | 10,820 cps        | 0.4 %         |

| Category    | Concentration average | Intensity average | Intensity RSD |
|-------------|-----------------------|-------------------|---------------|
| 45Sc (KED)  | 104.491 %             | 52,622 cps        | 0.9 %         |
| 51V (KED)   | 0.146 ppb             | 1,360 cps         | 6.9 %         |
| 52Cr (KED)  | 0.533 ppb             | 7,836 cps         | 2.6 %         |
| 55Mn (KED)  | 2.724 ppb             | 19,493 cps        | 2.5 %         |
| 56Fe (KED)  | 100.806 ppb           | 1,311,793 cps     | 0.4 %         |
| 58Ni (KED)  | 0.689 ppb             | 11,784 cps        | 0.3 %         |
| 59Co (KED)  | 0.040 ppb             | 1,131 cps         | 6.9 %         |
| 63Cu (KED)  | 2.444 ppb             | 49,577 cps        | 1.4 %         |
| 64Zn (KED)  | 47.150 ppb            | 252,362 cps       | 0.5 %         |
| 69Ga (KED)  | 0.368 ppb             | 2,540 cps         | 3.8 %         |
| 75As (KED)  | 0.078 ppb             | 127 cps           | 25.4 %        |
| 80Se (KED)  | 0.041 ppb             | 1,418 cps         | 11.0 %        |
| 85Rb (KED)  | 0.780 ppb             | 4,501 cps         | 1.9 %         |
| 88Sr (KED)  | 0.948 ppb             | 7,809 cps         | 0.5 %         |
| 89Y (KED)   | 97.829 %              | 435,312 cps       | 1.4 %         |
| 107Ag (KED) | 0.023 ppb             | 1,168 cps         | 9.0 %         |
| 114Cd (KED) | 0.009 ppb             | 212 cps           | 20.4 %        |
| 115In (KED) | 92.747 %              | 744,343 cps       | 0.7 %         |
| 133Cs (KED) | 0.015 ppb             | 447 cps           | 1.3 %         |
| 138Ba (KED) | 1.203 ppb             | 50,951 cps        | 1.4 %         |
| 139La (KED) | 0.068 ppb             | 5,989 cps         | 0.5 %         |
| 140Ce (KED) | 0.139 ppb             | 17,031 cps        | 2.5 %         |
| 141Pr (KED) | 0.016 ppb             | 1,911 cps         | 2.8 %         |
| 142Nd (KED) | 0.086 ppb             | 4,327 cps         | 6.7 %         |
| 152Sm (KED) | 0.011 ppb             | 478 cps           | 17.8 %        |
| 153Eu (KED) | 0.002 ppb             | 207 cps           | 30.6 %        |
| 158Gd (KED) | 0.010 ppb             | 602 cps           | 2.8 %         |
| 159Tb (KED) | 98.654 %              | 3,961,012 cps     | 1.2 %         |
| 164Dy (KED) | 0.007 ppb             | 491 cps           | 5.1 %         |
| 166Er (KED) | 0.001 ppb             | 416 cps           | 3.2 %         |
| 169Tm (KED) | 0.001 ppb             | 134 cps           | 17.4 %        |
| 174Yb (KED) | 0.003 ppb             | 302 cps           | 17.9 %        |
| 175Lu (KED) | -0.013 ppb            | 13,001 cps        | 1.2 %         |
| 205Tl (KED) | 0.003 ppb             | 496 cps           | 4.7 %         |
| 208Pb (KED) | 0.194 ppb             | 31,342 cps        | 1.9 %         |
| 209Bi (KED) | 93.028 %              | 3,179,567 cps     | 0.7 %         |
| 232Th (KED) | 0.019 ppb             | 4,839 cps         | 2.9 %         |
| 238U (KED)  | 0.005 ppb             | 1,475 cps         | 2.9 %         |

## Sample Summary

Instrument ID: iCAP Q

Analysis index: 28

Analysis name: 80010jian

Analysis started at: 11/3/2021 3:57:25 PM

User name: WINDOWS-UPCI4ER\Administrator

| Category    | Concentration average | Concentration RSD |
|-------------|-----------------------|-------------------|
| 6Li (KED)   | 110.228 %             | 4.2 %             |
| 9Be (KED)   | 0.000 ppb             |                   |
| 11B (KED)   | -1.720 ppb            | 101.1 %           |
| 24Mg (KED)  | 59.304 ppb            | 4.0 %             |
| 27Al (KED)  | 79.158 ppb            | 1.3 %             |
| 45Sc (KED)  | 103.833 %             | 0.6 %             |
| 51V (KED)   | 0.152 ppb             | 6.9 %             |
| 52Cr (KED)  | 0.594 ppb             | 1.9 %             |
| 55Mn (KED)  | 3.412 ppb             | 1.4 %             |
| 56Fe (KED)  | 85.322 ppb            | 1.2 %             |
| 58Ni (KED)  | 0.552 ppb             | 1.5 %             |
| 59Co (KED)  | 0.043 ppb             | 5.0 %             |
| 63Cu (KED)  | 3.101 ppb             | 2.1 %             |
| 64Zn (KED)  | 48.480 ppb            | 0.8 %             |
| 69Ga (KED)  | 0.346 ppb             | 2.3 %             |
| 75As (KED)  | 0.060 ppb             | 17.4 %            |
| 80Se (KED)  | -0.097 ppb            | 144.0 %           |
| 85Rb (KED)  | 0.607 ppb             | 1.7 %             |
| 88Sr (KED)  | 1.042 ppb             | 2.2 %             |
| 89Y (KED)   | 98.925 %              | 1.1 %             |
| 107Ag (KED) | 0.008 ppb             | 11.8 %            |
| 114Cd (KED) | 0.011 ppb             | 21.0 %            |
| 115In (KED) | 94.405 %              | 1.5 %             |
| 133Cs (KED) | 0.013 ppb             | 7.3 %             |
| 138Ba (KED) | 1.152 ppb             | 1.1 %             |
| 139La (KED) | 0.076 ppb             | 3.9 %             |
| 140Ce (KED) | 0.145 ppb             | 2.5 %             |
| 141Pr (KED) | 0.017 ppb             | 2.7 %             |
| 142Nd (KED) | 0.091 ppb             | 2.2 %             |
| 152Sm (KED) | 0.012 ppb             | 8.7 %             |
| 153Eu (KED) | 0.002 ppb             | 21.5 %            |
| 158Gd (KED) | 0.011 ppb             | 1.8 %             |
| 159Tb (KED) | 96.303 %              | 0.2 %             |
| 164Dy (KED) | 0.006 ppb             | 3.3 %             |
| 166Er (KED) | 0.001 ppb             | 17.0 %            |
| 169Tm (KED) | 0.001 ppb             | 24.4 %            |
| 174Yb (KED) | 0.003 ppb             | 2.2 %             |
| 175Lu (KED) | -0.010 ppb            | 33.5 %            |
| 205Tl (KED) | 0.002 ppb             | 5.9 %             |
| 208Pb (KED) | 0.176 ppb             | 1.2 %             |
| 209Bi (KED) | 92.594 %              | 0.4 %             |
| 232Th (KED) | 0.020 ppb             | 1.3 %             |
| 238U (KED)  | 0.005 ppb             | 15.8 %            |

| Category   | Concentration average | Intensity average | Intensity RSD |
|------------|-----------------------|-------------------|---------------|
| 6Li (KED)  | 110.228 %             | 3,018 cps         | 4.2 %         |
| 9Be (KED)  | 0.000 ppb             | 0 cps             |               |
| 11B (KED)  | -1.720 ppb            | 1,638 cps         | 4.3 %         |
| 24Mg (KED) | 59.304 ppb            | 35,088 cps        | 0.9 %         |
| 27Al (KED) | 79.158 ppb            | 11,280 cps        | 0.7 %         |

| Category    | Concentration average | Intensity average | Intensity RSD |
|-------------|-----------------------|-------------------|---------------|
| 45Sc (KED)  | 103.833 %             | 52,290 cps        | 0.6 %         |
| 51V (KED)   | 0.152 ppb             | 1,410 cps         | 6.3 %         |
| 52Cr (KED)  | 0.594 ppb             | 8,671 cps         | 2.4 %         |
| 55Mn (KED)  | 3.412 ppb             | 24,237 cps        | 1.6 %         |
| 56Fe (KED)  | 85.322 ppb            | 1,104,022 cps     | 0.7 %         |
| 58Ni (KED)  | 0.552 ppb             | 9,444 cps         | 1.9 %         |
| 59Co (KED)  | 0.043 ppb             | 1,189 cps         | 4.5 %         |
| 63Cu (KED)  | 3.101 ppb             | 63,337 cps        | 0.9 %         |
| 64Zn (KED)  | 48.480 ppb            | 262,085 cps       | 0.6 %         |
| 69Ga (KED)  | 0.346 ppb             | 2,421 cps         | 3.1 %         |
| 75As (KED)  | 0.060 ppb             | 100 cps           | 14.5 %        |
| 80Se (KED)  | -0.097 ppb            | 1,371 cps         | 3.4 %         |
| 85Rb (KED)  | 0.607 ppb             | 3,547 cps         | 2.4 %         |
| 88Sr (KED)  | 1.042 ppb             | 8,657 cps         | 1.4 %         |
| 89Y (KED)   | 98.925 %              | 440,192 cps       | 1.1 %         |
| 107Ag (KED) | 0.008 ppb             | 436 cps           | 11.5 %        |
| 114Cd (KED) | 0.011 ppb             | 241 cps           | 16.0 %        |
| 115In (KED) | 94.405 %              | 757,651 cps       | 1.5 %         |
| 133Cs (KED) | 0.013 ppb             | 392 cps           | 6.4 %         |
| 138Ba (KED) | 1.152 ppb             | 47,784 cps        | 0.8 %         |
| 139La (KED) | 0.076 ppb             | 6,475 cps         | 4.0 %         |
| 140Ce (KED) | 0.145 ppb             | 17,291 cps        | 2.1 %         |
| 141Pr (KED) | 0.017 ppb             | 2,026 cps         | 2.7 %         |
| 142Nd (KED) | 0.091 ppb             | 4,433 cps         | 2.3 %         |
| 152Sm (KED) | 0.012 ppb             | 489 cps           | 8.6 %         |
| 153Eu (KED) | 0.002 ppb             | 209 cps           | 20.3 %        |
| 158Gd (KED) | 0.011 ppb             | 599 cps           | 1.6 %         |
| 159Tb (KED) | 96.303 %              | 3,866,646 cps     | 0.2 %         |
| 164Dy (KED) | 0.006 ppb             | 390 cps           | 3.0 %         |
| 166Er (KED) | 0.001 ppb             | 422 cps           | 3.3 %         |
| 169Tm (KED) | 0.001 ppb             | 132 cps           | 22.9 %        |
| 174Yb (KED) | 0.003 ppb             | 254 cps           | 2.0 %         |
| 175Lu (KED) | -0.010 ppb            | 13,090 cps        | 3.9 %         |
| 205Tl (KED) | 0.002 ppb             | 438 cps           | 5.8 %         |
| 208Pb (KED) | 0.176 ppb             | 29,190 cps        | 0.7 %         |
| 209Bi (KED) | 92.594 %              | 3,164,743 cps     | 0.4 %         |
| 232Th (KED) | 0.020 ppb             | 4,910 cps         | 1.3 %         |
| 238U (KED)  | 0.005 ppb             | 1,506 cps         | 14.4 %        |

## Sample Summary

Instrument ID: iCAP Q

Analysis index: 29

Analysis name: 603104jian

Analysis started at: 11/3/2021 4:00:39 PM

User name: WINDOWS-UPCI4ER\Administrator

| Category    | Concentration average | Concentration RSD |
|-------------|-----------------------|-------------------|
| 6Li (KED)   | 104.018 %             | 4.5 %             |
| 9Be (KED)   | 0.015 ppb             | 86.8 %            |
| 11B (KED)   | -5.311 ppb            | 13.6 %            |
| 24Mg (KED)  | 119.787 ppb           | 3.4 %             |
| 27Al (KED)  | 215.776 ppb           | 2.0 %             |
| 45Sc (KED)  | 102.105 %             | 0.8 %             |
| 51V (KED)   | 0.396 ppb             | 2.8 %             |
| 52Cr (KED)  | 0.960 ppb             | 1.2 %             |
| 55Mn (KED)  | 7.699 ppb             | 1.4 %             |
| 56Fe (KED)  | 230.261 ppb           | 0.7 %             |
| 58Ni (KED)  | 1.195 ppb             | 0.8 %             |
| 59Co (KED)  | 0.114 ppb             | 1.6 %             |
| 63Cu (KED)  | 2.199 ppb             | 0.8 %             |
| 64Zn (KED)  | 63.198 ppb            | 1.8 %             |
| 69Ga (KED)  | 0.822 ppb             | 2.0 %             |
| 75As (KED)  | 0.160 ppb             | 13.0 %            |
| 80Se (KED)  | -0.070 ppb            | 303.0 %           |
| 85Rb (KED)  | 0.434 ppb             | 3.7 %             |
| 88Sr (KED)  | 1.763 ppb             | 2.5 %             |
| 89Y (KED)   | 96.950 %              | 1.2 %             |
| 107Ag (KED) | 0.038 ppb             | 1.8 %             |
| 114Cd (KED) | 0.012 ppb             | 3.3 %             |
| 115In (KED) | 93.318 %              | 0.7 %             |
| 133Cs (KED) | 0.038 ppb             | 4.2 %             |
| 138Ba (KED) | 2.543 ppb             | 2.1 %             |
| 139La (KED) | 0.204 ppb             | 1.1 %             |
| 140Ce (KED) | 0.429 ppb             | 2.8 %             |
| 141Pr (KED) | 0.048 ppb             | 5.2 %             |
| 142Nd (KED) | 0.275 ppb             | 1.1 %             |
| 152Sm (KED) | 0.033 ppb             | 5.8 %             |
| 153Eu (KED) | 0.007 ppb             | 8.5 %             |
| 158Gd (KED) | 0.031 ppb             | 4.9 %             |
| 159Tb (KED) | 96.211 %              | 1.6 %             |
| 164Dy (KED) | 0.022 ppb             | 0.8 %             |
| 166Er (KED) | 0.008 ppb             | 3.3 %             |
| 169Tm (KED) | 0.001 ppb             | 3.8 %             |
| 174Yb (KED) | 0.009 ppb             | 2.8 %             |
| 175Lu (KED) | -0.012 ppb            | 21.6 %            |
| 205Tl (KED) | 0.004 ppb             | 6.0 %             |
| 208Pb (KED) | 0.406 ppb             | 1.6 %             |
| 209Bi (KED) | 92.214 %              | 1.2 %             |
| 232Th (KED) | 0.054 ppb             | 2.4 %             |
| 238U (KED)  | 0.014 ppb             | 1.6 %             |

| Category   | Concentration average | Intensity average | Intensity RSD |
|------------|-----------------------|-------------------|---------------|
| 6Li (KED)  | 104.018 %             | 2,848 cps         | 4.5 %         |
| 9Be (KED)  | 0.015 ppb             | 2 cps             | 86.6 %        |
| 11B (KED)  | -5.311 ppb            | 1,323 cps         | 1.1 %         |
| 24Mg (KED) | 119.787 ppb           | 66,588 cps        | 1.9 %         |
| 27Al (KED) | 215.776 ppb           | 29,689 cps        | 2.0 %         |

| Category    | Concentration average | Intensity average | Intensity RSD |
|-------------|-----------------------|-------------------|---------------|
| 45Sc (KED)  | 102.105 %             | 51,420 cps        | 0.8 %         |
| 51V (KED)   | 0.396 ppb             | 3,595 cps         | 2.7 %         |
| 52Cr (KED)  | 0.960 ppb             | 13,708 cps        | 0.5 %         |
| 55Mn (KED)  | 7.699 ppb             | 53,663 cps        | 0.8 %         |
| 56Fe (KED)  | 230.261 ppb           | 2,921,896 cps     | 0.3 %         |
| 58Ni (KED)  | 1.195 ppb             | 19,747 cps        | 1.4 %         |
| 59Co (KED)  | 0.114 ppb             | 3,060 cps         | 1.0 %         |
| 63Cu (KED)  | 2.199 ppb             | 44,303 cps        | 1.6 %         |
| 64Zn (KED)  | 63.198 ppb            | 331,314 cps       | 0.7 %         |
| 69Ga (KED)  | 0.822 ppb             | 5,412 cps         | 0.9 %         |
| 75As (KED)  | 0.160 ppb             | 244 cps           | 12.4 %        |
| 80Se (KED)  | -0.070 ppb            | 1,357 cps         | 7.7 %         |
| 85Rb (KED)  | 0.434 ppb             | 2,488 cps         | 2.5 %         |
| 88Sr (KED)  | 1.763 ppb             | 14,219 cps        | 3.0 %         |
| 89Y (KED)   | 96.950 %              | 431,402 cps       | 1.2 %         |
| 107Ag (KED) | 0.038 ppb             | 1,955 cps         | 1.2 %         |
| 114Cd (KED) | 0.012 ppb             | 254 cps           | 2.0 %         |
| 115In (KED) | 93.318 %              | 748,922 cps       | 0.7 %         |
| 133Cs (KED) | 0.038 ppb             | 1,087 cps         | 4.3 %         |
| 138Ba (KED) | 2.543 ppb             | 101,223 cps       | 1.4 %         |
| 139La (KED) | 0.204 ppb             | 17,240 cps        | 2.6 %         |
| 140Ce (KED) | 0.429 ppb             | 48,924 cps        | 2.1 %         |
| 141Pr (KED) | 0.048 ppb             | 5,546 cps         | 4.6 %         |
| 142Nd (KED) | 0.275 ppb             | 12,872 cps        | 0.5 %         |
| 152Sm (KED) | 0.033 ppb             | 1,350 cps         | 5.5 %         |
| 153Eu (KED) | 0.007 ppb             | 592 cps           | 7.0 %         |
| 158Gd (KED) | 0.031 ppb             | 1,713 cps         | 3.2 %         |
| 159Tb (KED) | 96.211 %              | 3,862,956 cps     | 1.6 %         |
| 164Dy (KED) | 0.022 ppb             | 1,365 cps         | 2.2 %         |
| 166Er (KED) | 0.008 ppb             | 952 cps           | 2.8 %         |
| 169Tm (KED) | 0.001 ppb             | 312 cps           | 2.5 %         |
| 174Yb (KED) | 0.009 ppb             | 760 cps           | 3.9 %         |
| 175Lu (KED) | -0.012 ppb            | 12,850 cps        | 1.2 %         |
| 205Tl (KED) | 0.004 ppb             | 676 cps           | 6.6 %         |
| 208Pb (KED) | 0.406 ppb             | 55,219 cps        | 0.2 %         |
| 209Bi (KED) | 92.214 %              | 3,151,742 cps     | 1.2 %         |
| 232Th (KED) | 0.054 ppb             | 13,052 cps        | 1.5 %         |
| 238U (KED)  | 0.014 ppb             | 3,801 cps         | 0.3 %         |

## Sample Summary

Instrument ID: iCAP Q

Analysis index: 30

Analysis name: 80190jian

Analysis started at: 11/3/2021 4:03:51 PM

User name: WINDOWS-UPCI4ER\Administrator

| Category    | Concentration average | Concentration RSD |
|-------------|-----------------------|-------------------|
| 6Li (KED)   | 103.815 %             | 2.3 %             |
| 9Be (KED)   | 0.000 ppb             |                   |
| 11B (KED)   | 11.218 ppb            | 10.8 %            |
| 24Mg (KED)  | 80.750 ppb            | 3.5 %             |
| 27Al (KED)  | 123.690 ppb           | 3.6 %             |
| 45Sc (KED)  | 100.926 %             | 1.8 %             |
| 51V (KED)   | 0.221 ppb             | 5.8 %             |
| 52Cr (KED)  | 1.228 ppb             | 1.2 %             |
| 55Mn (KED)  | 3.048 ppb             | 1.9 %             |
| 56Fe (KED)  | 145.346 ppb           | 2.0 %             |
| 58Ni (KED)  | 0.772 ppb             | 3.7 %             |
| 59Co (KED)  | 0.061 ppb             | 4.4 %             |
| 63Cu (KED)  | 1.978 ppb             | 1.1 %             |
| 64Zn (KED)  | 54.556 ppb            | 0.9 %             |
| 69Ga (KED)  | 0.457 ppb             | 8.5 %             |
| 75As (KED)  | 0.181 ppb             | 3.2 %             |
| 80Se (KED)  | -0.035 ppb            | 550.7 %           |
| 85Rb (KED)  | 0.621 ppb             | 5.4 %             |
| 88Sr (KED)  | 1.598 ppb             | 4.6 %             |
| 89Y (KED)   | 93.637 %              | 1.4 %             |
| 107Ag (KED) | 0.013 ppb             | 3.8 %             |
| 114Cd (KED) | 0.004 ppb             | 7.6 %             |
| 115In (KED) | 92.071 %              | 1.3 %             |
| 133Cs (KED) | 0.023 ppb             | 9.5 %             |
| 138Ba (KED) | 1.446 ppb             | 0.3 %             |
| 139La (KED) | 0.167 ppb             | 1.1 %             |
| 140Ce (KED) | 0.329 ppb             | 1.9 %             |
| 141Pr (KED) | 0.037 ppb             | 3.1 %             |
| 142Nd (KED) | 0.199 ppb             | 2.9 %             |
| 152Sm (KED) | 0.027 ppb             | 10.8 %            |
| 153Eu (KED) | 0.005 ppb             | 9.9 %             |
| 158Gd (KED) | 0.023 ppb             | 7.8 %             |
| 159Tb (KED) | 93.743 %              | 1.2 %             |
| 164Dy (KED) | 0.016 ppb             | 1.2 %             |
| 166Er (KED) | 0.005 ppb             | 15.3 %            |
| 169Tm (KED) | 0.001 ppb             | 17.0 %            |
| 174Yb (KED) | 0.005 ppb             | 14.0 %            |
| 175Lu (KED) | -0.010 ppb            | 22.8 %            |
| 205Tl (KED) | 0.004 ppb             | 10.8 %            |
| 208Pb (KED) | 0.252 ppb             | 2.8 %             |
| 209Bi (KED) | 92.099 %              | 1.0 %             |
| 232Th (KED) | 0.034 ppb             | 2.4 %             |
| 238U (KED)  | 0.010 ppb             | 1.6 %             |

| Category   | Concentration average | Intensity average | Intensity RSD |
|------------|-----------------------|-------------------|---------------|
| 6Li (KED)  | 103.815 %             | 2,843 cps         | 2.3 %         |
| 9Be (KED)  | 0.000 ppb             | 0 cps             |               |
| 11B (KED)  | 11.218 ppb            | 2,347 cps         | 1.5 %         |
| 24Mg (KED) | 80.750 ppb            | 44,914 cps        | 1.2 %         |
| 27Al (KED) | 123.690 ppb           | 16,949 cps        | 1.8 %         |

| Category    | Concentration average | Intensity average | Intensity RSD |
|-------------|-----------------------|-------------------|---------------|
| 45Sc (KED)  | 100.926 %             | 50,827 cps        | 1.8 %         |
| 51V (KED)   | 0.221 ppb             | 1,983 cps         | 5.7 %         |
| 52Cr (KED)  | 1.228 ppb             | 17,303 cps        | 2.1 %         |
| 55Mn (KED)  | 3.048 ppb             | 21,050 cps        | 0.8 %         |
| 56Fe (KED)  | 145.346 ppb           | 1,824,463 cps     | 0.7 %         |
| 58Ni (KED)  | 0.772 ppb             | 12,718 cps        | 1.9 %         |
| 59Co (KED)  | 0.061 ppb             | 1,633 cps         | 2.7 %         |
| 63Cu (KED)  | 1.978 ppb             | 38,575 cps        | 0.7 %         |
| 64Zn (KED)  | 54.556 ppb            | 277,809 cps       | 2.2 %         |
| 69Ga (KED)  | 0.457 ppb             | 2,976 cps         | 7.5 %         |
| 75As (KED)  | 0.181 ppb             | 266 cps           | 1.9 %         |
| 80Se (KED)  | -0.035 ppb            | 1,323 cps         | 4.7 %         |
| 85Rb (KED)  | 0.621 ppb             | 3,434 cps         | 4.4 %         |
| 88Sr (KED)  | 1.598 ppb             | 12,464 cps        | 3.4 %         |
| 89Y (KED)   | 93.637 %              | 416,661 cps       | 1.4 %         |
| 107Ag (KED) | 0.013 ppb             | 690 cps           | 4.8 %         |
| 114Cd (KED) | 0.004 ppb             | 108 cps           | 4.7 %         |
| 115In (KED) | 92.071 %              | 738,919 cps       | 1.3 %         |
| 133Cs (KED) | 0.023 ppb             | 653 cps           | 8.0 %         |
| 138Ba (KED) | 1.446 ppb             | 57,510 cps        | 1.4 %         |
| 139La (KED) | 0.167 ppb             | 13,774 cps        | 1.7 %         |
| 140Ce (KED) | 0.329 ppb             | 36,834 cps        | 2.4 %         |
| 141Pr (KED) | 0.037 ppb             | 4,205 cps         | 3.8 %         |
| 142Nd (KED) | 0.199 ppb             | 9,159 cps         | 3.9 %         |
| 152Sm (KED) | 0.027 ppb             | 1,078 cps         | 10.6 %        |
| 153Eu (KED) | 0.005 ppb             | 436 cps           | 10.9 %        |
| 158Gd (KED) | 0.023 ppb             | 1,230 cps         | 6.6 %         |
| 159Tb (KED) | 93.743 %              | 3,763,857 cps     | 1.2 %         |
| 164Dy (KED) | 0.016 ppb             | 973 cps           | 0.0 %         |
| 166Er (KED) | 0.005 ppb             | 680 cps           | 7.4 %         |
| 169Tm (KED) | 0.001 ppb             | 216 cps           | 17.0 %        |
| 174Yb (KED) | 0.005 ppb             | 454 cps           | 13.3 %        |
| 175Lu (KED) | -0.010 ppb            | 12,720 cps        | 1.5 %         |
| 205Tl (KED) | 0.004 ppb             | 668 cps           | 9.7 %         |
| 208Pb (KED) | 0.252 ppb             | 37,724 cps        | 2.0 %         |
| 209Bi (KED) | 92.099 %              | 3,147,804 cps     | 1.0 %         |
| 232Th (KED) | 0.034 ppb             | 8,279 cps         | 2.7 %         |
| 238U (KED)  | 0.010 ppb             | 2,819 cps         | 2.4 %         |

## Sample Summary

Instrument ID: iCAP Q

Analysis index: 31

Analysis name: 805193jian

Analysis started at: 11/3/2021 4:07:09 PM

User name: WINDOWS-UPCI4ER\Administrator

| Category    | Concentration average | Concentration RSD |
|-------------|-----------------------|-------------------|
| 6Li (KED)   | 100.203 %             |                   |
| 9Be (KED)   | 0.000 ppb             |                   |
| 11B (KED)   | -7.862 ppb            |                   |
| 24Mg (KED)  | 122.737 ppb           |                   |
| 27Al (KED)  | 186.846 ppb           |                   |
| 45Sc (KED)  | 99.344 %              |                   |
| 51V (KED)   | 0.362 ppb             |                   |
| 52Cr (KED)  | 0.770 ppb             |                   |
| 55Mn (KED)  | 7.020 ppb             |                   |
| 56Fe (KED)  | 200.494 ppb           |                   |
| 58Ni (KED)  | 1.136 ppb             |                   |
| 59Co (KED)  | 0.108 ppb             |                   |
| 63Cu (KED)  | 2.840 ppb             |                   |
| 64Zn (KED)  | 52.906 ppb            |                   |
| 69Ga (KED)  | 0.776 ppb             |                   |
| 75As (KED)  | 0.154 ppb             |                   |
| 80Se (KED)  | 0.240 ppb             |                   |
| 85Rb (KED)  | 0.497 ppb             |                   |
| 88Sr (KED)  | 2.020 ppb             |                   |
| 89Y (KED)   | 92.003 %              |                   |
| 107Ag (KED) | 0.030 ppb             |                   |
| 114Cd (KED) | 0.018 ppb             |                   |
| 115In (KED) | 87.324 %              |                   |
| 133Cs (KED) | 0.035 ppb             |                   |
| 138Ba (KED) | 2.440 ppb             |                   |
| 139La (KED) | 0.179 ppb             |                   |
| 140Ce (KED) | 0.367 ppb             |                   |
| 141Pr (KED) | 0.043 ppb             |                   |
| 142Nd (KED) | 0.232 ppb             |                   |
| 152Sm (KED) | 0.030 ppb             |                   |
| 153Eu (KED) | 0.006 ppb             |                   |
| 158Gd (KED) | 0.029 ppb             |                   |
| 159Tb (KED) | 90.161 %              |                   |
| 164Dy (KED) | 0.020 ppb             |                   |
| 166Er (KED) | 0.005 ppb             |                   |
| 169Tm (KED) | 0.002 ppb             |                   |
| 174Yb (KED) | 0.008 ppb             |                   |
| 175Lu (KED) | -0.011 ppb            |                   |
| 205Tl (KED) | 0.005 ppb             |                   |
| 208Pb (KED) | 0.418 ppb             |                   |
| 209Bi (KED) | 87.502 %              |                   |
| 232Th (KED) | 0.050 ppb             |                   |
| 238U (KED)  | 0.014 ppb             |                   |

| Category   | Concentration average | Intensity average | Intensity RSD |
|------------|-----------------------|-------------------|---------------|
| 6Li (KED)  | 100.203 %             | 2,744 cps         |               |
| 9Be (KED)  | 0.000 ppb             | 0 cps             |               |
| 11B (KED)  | -7.862 ppb            | 1,123 cps         |               |
| 24Mg (KED) | 122.737 ppb           | 65,780 cps        |               |
| 27Al (KED) | 186.846 ppb           | 25,055 cps        |               |

| Category    | Concentration average | Intensity average | Intensity RSD |
|-------------|-----------------------|-------------------|---------------|
| 45Sc (KED)  | 99.344 %              | 50,030 cps        |               |
| 51V (KED)   | 0.362 ppb             | 3,197 cps         |               |
| 52Cr (KED)  | 0.770 ppb             | 10,721 cps        |               |
| 55Mn (KED)  | 7.020 ppb             | 47,614 cps        |               |
| 56Fe (KED)  | 200.494 ppb           | 2,476,070 cps     |               |
| 58Ni (KED)  | 1.136 ppb             | 18,270 cps        |               |
| 59Co (KED)  | 0.108 ppb             | 2,820 cps         |               |
| 63Cu (KED)  | 2.840 ppb             | 54,040 cps        |               |
| 64Zn (KED)  | 52.906 ppb            | 265,012 cps       |               |
| 69Ga (KED)  | 0.776 ppb             | 4,854 cps         |               |
| 75As (KED)  | 0.154 ppb             | 223 cps           |               |
| 80Se (KED)  | 0.240 ppb             | 1,413 cps         |               |
| 85Rb (KED)  | 0.497 ppb             | 2,704 cps         |               |
| 88Sr (KED)  | 2.020 ppb             | 15,430 cps        |               |
| 89Y (KED)   | 92.003 %              | 409,387 cps       |               |
| 107Ag (KED) | 0.030 ppb             | 1,433 cps         |               |
| 114Cd (KED) | 0.018 ppb             | 350 cps           |               |
| 115In (KED) | 87.324 %              | 700,823 cps       |               |
| 133Cs (KED) | 0.035 ppb             | 947 cps           |               |
| 138Ba (KED) | 2.440 ppb             | 91,132 cps        |               |
| 139La (KED) | 0.179 ppb             | 14,208 cps        |               |
| 140Ce (KED) | 0.367 ppb             | 39,322 cps        |               |
| 141Pr (KED) | 0.043 ppb             | 4,708 cps         |               |
| 142Nd (KED) | 0.232 ppb             | 10,238 cps        |               |
| 152Sm (KED) | 0.030 ppb             | 1,147 cps         |               |
| 153Eu (KED) | 0.006 ppb             | 470 cps           |               |
| 158Gd (KED) | 0.029 ppb             | 1,487 cps         |               |
| 159Tb (KED) | 90.161 %              | 3,620,021 cps     |               |
| 164Dy (KED) | 0.020 ppb             | 1,147 cps         |               |
| 166Er (KED) | 0.005 ppb             | 673 cps           |               |
| 169Tm (KED) | 0.002 ppb             | 350 cps           |               |
| 174Yb (KED) | 0.008 ppb             | 673 cps           |               |
| 175Lu (KED) | -0.011 ppb            | 12,183 cps        |               |
| 205Tl (KED) | 0.005 ppb             | 807 cps           |               |
| 208Pb (KED) | 0.418 ppb             | 53,679 cps        |               |
| 209Bi (KED) | 87.502 %              | 2,990,711 cps     |               |
| 232Th (KED) | 0.050 ppb             | 11,505 cps        |               |
| 238U (KED)  | 0.014 ppb             | 3,507 cps         |               |

## Sample Summary

Instrument ID: iCAP Q

Analysis index: 32

Analysis name: 80056jian

Analysis started at: 11/3/2021 4:09:01 PM

User name: WINDOWS-UPCI4ER\Administrator

| Category    | Concentration average | Concentration RSD |
|-------------|-----------------------|-------------------|
| 6Li (KED)   | 101.664 %             |                   |
| 9Be (KED)   | 0.046 ppb             |                   |
| 11B (KED)   | 9.861 ppb             |                   |
| 24Mg (KED)  | 66.044 ppb            |                   |
| 27Al (KED)  | 101.713 ppb           |                   |
| 45Sc (KED)  | 97.836 %              |                   |
| 51V (KED)   | 0.194 ppb             |                   |
| 52Cr (KED)  | 0.762 ppb             |                   |
| 55Mn (KED)  | 2.528 ppb             |                   |
| 56Fe (KED)  | 117.842 ppb           |                   |
| 58Ni (KED)  | 0.963 ppb             |                   |
| 59Co (KED)  | 0.049 ppb             |                   |
| 63Cu (KED)  | 2.266 ppb             |                   |
| 64Zn (KED)  | 53.243 ppb            |                   |
| 69Ga (KED)  | 0.398 ppb             |                   |
| 75As (KED)  | 0.103 ppb             |                   |
| 80Se (KED)  | -0.057 ppb            |                   |
| 85Rb (KED)  | 0.437 ppb             |                   |
| 88Sr (KED)  | 1.057 ppb             |                   |
| 89Y (KED)   | 96.124 %              |                   |
| 107Ag (KED) | 0.014 ppb             |                   |
| 114Cd (KED) | 0.003 ppb             |                   |
| 115In (KED) | 91.295 %              |                   |
| 133Cs (KED) | 0.018 ppb             |                   |
| 138Ba (KED) | 1.211 ppb             |                   |
| 139La (KED) | 0.100 ppb             |                   |
| 140Ce (KED) | 0.202 ppb             |                   |
| 141Pr (KED) | 0.024 ppb             |                   |
| 142Nd (KED) | 0.124 ppb             |                   |
| 152Sm (KED) | 0.015 ppb             |                   |
| 153Eu (KED) | 0.003 ppb             |                   |
| 158Gd (KED) | 0.016 ppb             |                   |
| 159Tb (KED) | 95.364 %              |                   |
| 164Dy (KED) | 0.011 ppb             |                   |
| 166Er (KED) | 0.004 ppb             |                   |
| 169Tm (KED) | 0.001 ppb             |                   |
| 174Yb (KED) | 0.004 ppb             |                   |
| 175Lu (KED) | -0.012 ppb            |                   |
| 205Tl (KED) | 0.003 ppb             |                   |
| 208Pb (KED) | 0.183 ppb             |                   |
| 209Bi (KED) | 90.561 %              |                   |
| 232Th (KED) | 0.031 ppb             |                   |
| 238U (KED)  | 0.008 ppb             |                   |

| Category   | Concentration average | Intensity average | Intensity RSD |
|------------|-----------------------|-------------------|---------------|
| 6Li (KED)  | 101.664 %             | 2,784 cps         |               |
| 9Be (KED)  | 0.046 ppb             | 7 cps             |               |
| 11B (KED)  | 9.861 ppb             | 2,217 cps         |               |
| 24Mg (KED) | 66.044 ppb            | 36,045 cps        |               |
| 27Al (KED) | 101.713 ppb           | 13,571 cps        |               |

| Category    | Concentration average | Intensity average | Intensity RSD |
|-------------|-----------------------|-------------------|---------------|
| 45Sc (KED)  | 97.836 %              | 49,271 cps        |               |
| 51V (KED)   | 0.194 ppb             | 1,690 cps         |               |
| 52Cr (KED)  | 0.762 ppb             | 10,451 cps        |               |
| 55Mn (KED)  | 2.528 ppb             | 16,945 cps        |               |
| 56Fe (KED)  | 117.842 ppb           | 1,435,095 cps     |               |
| 58Ni (KED)  | 0.963 ppb             | 15,299 cps        |               |
| 59Co (KED)  | 0.049 ppb             | 1,293 cps         |               |
| 63Cu (KED)  | 2.266 ppb             | 45,239 cps        |               |
| 64Zn (KED)  | 53.243 ppb            | 278,578 cps       |               |
| 69Ga (KED)  | 0.398 ppb             | 2,680 cps         |               |
| 75As (KED)  | 0.103 ppb             | 160 cps           |               |
| 80Se (KED)  | -0.057 ppb            | 1,350 cps         |               |
| 85Rb (KED)  | 0.437 ppb             | 2,487 cps         |               |
| 88Sr (KED)  | 1.057 ppb             | 8,536 cps         |               |
| 89Y (KED)   | 96.124 %              | 427,726 cps       |               |
| 107Ag (KED) | 0.014 ppb             | 713 cps           |               |
| 114Cd (KED) | 0.003 ppb             | 100 cps           |               |
| 115In (KED) | 91.295 %              | 732,691 cps       |               |
| 133Cs (KED) | 0.018 ppb             | 530 cps           |               |
| 138Ba (KED) | 1.211 ppb             | 49,579 cps        |               |
| 139La (KED) | 0.100 ppb             | 8,446 cps         |               |
| 140Ce (KED) | 0.202 ppb             | 23,479 cps        |               |
| 141Pr (KED) | 0.024 ppb             | 2,760 cps         |               |
| 142Nd (KED) | 0.124 ppb             | 5,881 cps         |               |
| 152Sm (KED) | 0.015 ppb             | 623 cps           |               |
| 153Eu (KED) | 0.003 ppb             | 260 cps           |               |
| 158Gd (KED) | 0.016 ppb             | 900 cps           |               |
| 159Tb (KED) | 95.364 %              | 3,828,937 cps     |               |
| 164Dy (KED) | 0.011 ppb             | 690 cps           |               |
| 166Er (KED) | 0.004 ppb             | 603 cps           |               |
| 169Tm (KED) | 0.001 ppb             | 157 cps           |               |
| 174Yb (KED) | 0.004 ppb             | 367 cps           |               |
| 175Lu (KED) | -0.012 ppb            | 12,720 cps        |               |
| 205Tl (KED) | 0.003 ppb             | 490 cps           |               |
| 208Pb (KED) | 0.183 ppb             | 29,345 cps        |               |
| 209Bi (KED) | 90.561 %              | 3,095,236 cps     |               |
| 232Th (KED) | 0.031 ppb             | 7,419 cps         |               |
| 238U (KED)  | 0.008 ppb             | 2,157 cps         |               |

## Sample Summary

Instrument ID: iCAP Q

Analysis index: 33

Analysis name: 80089jian

Analysis started at: 11/3/2021 4:10:58 PM

User name: WINDOWS-UPCI4ER\Administrator

| Category    | Concentration average | Concentration RSD |
|-------------|-----------------------|-------------------|
| 6Li (KED)   | 105.561 %             |                   |
| 9Be (KED)   | 0.000 ppb             |                   |
| 11B (KED)   | 31.816 ppb            |                   |
| 24Mg (KED)  | 74.001 ppb            |                   |
| 27Al (KED)  | 102.099 ppb           |                   |
| 45Sc (KED)  | 96.421 %              |                   |
| 51V (KED)   | 0.196 ppb             |                   |
| 52Cr (KED)  | 0.744 ppb             |                   |
| 55Mn (KED)  | 4.694 ppb             |                   |
| 56Fe (KED)  | 118.052 ppb           |                   |
| 58Ni (KED)  | 1.085 ppb             |                   |
| 59Co (KED)  | 0.063 ppb             |                   |
| 63Cu (KED)  | 2.585 ppb             |                   |
| 64Zn (KED)  | 52.009 ppb            |                   |
| 69Ga (KED)  | 0.473 ppb             |                   |
| 75As (KED)  | 0.101 ppb             |                   |
| 80Se (KED)  | -0.436 ppb            |                   |
| 85Rb (KED)  | 0.482 ppb             |                   |
| 88Sr (KED)  | 1.201 ppb             |                   |
| 89Y (KED)   | 91.970 %              |                   |
| 107Ag (KED) | 0.016 ppb             |                   |
| 114Cd (KED) | 0.012 ppb             |                   |
| 115In (KED) | 89.492 %              |                   |
| 133Cs (KED) | 0.022 ppb             |                   |
| 138Ba (KED) | 1.473 ppb             |                   |
| 139La (KED) | 0.107 ppb             |                   |
| 140Ce (KED) | 0.218 ppb             |                   |
| 141Pr (KED) | 0.028 ppb             |                   |
| 142Nd (KED) | 0.143 ppb             |                   |
| 152Sm (KED) | 0.020 ppb             |                   |
| 153Eu (KED) | 0.004 ppb             |                   |
| 158Gd (KED) | 0.016 ppb             |                   |
| 159Tb (KED) | 88.827 %              |                   |
| 164Dy (KED) | 0.012 ppb             |                   |
| 166Er (KED) | 0.003 ppb             |                   |
| 169Tm (KED) | 0.001 ppb             |                   |
| 174Yb (KED) | 0.004 ppb             |                   |
| 175Lu (KED) | -0.001 ppb            |                   |
| 205Tl (KED) | 0.004 ppb             |                   |
| 208Pb (KED) | 0.183 ppb             |                   |
| 209Bi (KED) | 87.993 %              |                   |
| 232Th (KED) | 0.027 ppb             |                   |
| 238U (KED)  | 0.007 ppb             |                   |

| Category   | Concentration average | Intensity average | Intensity RSD |
|------------|-----------------------|-------------------|---------------|
| 6Li (KED)  | 105.561 %             | 2,890 cps         |               |
| 9Be (KED)  | 0.000 ppb             | 0 cps             |               |
| 11B (KED)  | 31.816 ppb            | 3,687 cps         |               |
| 24Mg (KED) | 74.001 ppb            | 41,900 cps        |               |
| 27Al (KED) | 102.099 ppb           | 13,424 cps        |               |

| Category    | Concentration average | Intensity average | Intensity RSD |
|-------------|-----------------------|-------------------|---------------|
| 45Sc (KED)  | 96.421 %              | 48,558 cps        |               |
| 51V (KED)   | 0.196 ppb             | 1,687 cps         |               |
| 52Cr (KED)  | 0.744 ppb             | 10,051 cps        |               |
| 55Mn (KED)  | 4.694 ppb             | 30,932 cps        |               |
| 56Fe (KED)  | 118.052 ppb           | 1,416,843 cps     |               |
| 58Ni (KED)  | 1.085 ppb             | 16,952 cps        |               |
| 59Co (KED)  | 0.063 ppb             | 1,623 cps         |               |
| 63Cu (KED)  | 2.585 ppb             | 49,250 cps        |               |
| 64Zn (KED)  | 52.009 ppb            | 260,613 cps       |               |
| 69Ga (KED)  | 0.473 ppb             | 3,024 cps         |               |
| 75As (KED)  | 0.101 ppb             | 150 cps           |               |
| 80Se (KED)  | -0.436 ppb            | 1,137 cps         |               |
| 85Rb (KED)  | 0.482 ppb             | 2,624 cps         |               |
| 88Sr (KED)  | 1.201 ppb             | 9,250 cps         |               |
| 89Y (KED)   | 91.970 %              | 409,244 cps       |               |
| 107Ag (KED) | 0.016 ppb             | 787 cps           |               |
| 114Cd (KED) | 0.012 ppb             | 247 cps           |               |
| 115In (KED) | 89.492 %              | 718,219 cps       |               |
| 133Cs (KED) | 0.022 ppb             | 620 cps           |               |
| 138Ba (KED) | 1.473 ppb             | 55,464 cps        |               |
| 139La (KED) | 0.107 ppb             | 8,373 cps         |               |
| 140Ce (KED) | 0.218 ppb             | 23,445 cps        |               |
| 141Pr (KED) | 0.028 ppb             | 2,970 cps         |               |
| 142Nd (KED) | 0.143 ppb             | 6,302 cps         |               |
| 152Sm (KED) | 0.020 ppb             | 757 cps           |               |
| 153Eu (KED) | 0.004 ppb             | 317 cps           |               |
| 158Gd (KED) | 0.016 ppb             | 823 cps           |               |
| 159Tb (KED) | 88.827 %              | 3,566,474 cps     |               |
| 164Dy (KED) | 0.012 ppb             | 717 cps           |               |
| 166Er (KED) | 0.003 ppb             | 537 cps           |               |
| 169Tm (KED) | 0.001 ppb             | 183 cps           |               |
| 174Yb (KED) | 0.004 ppb             | 360 cps           |               |
| 175Lu (KED) | -0.001 ppb            | 13,224 cps        |               |
| 205Tl (KED) | 0.004 ppb             | 610 cps           |               |
| 208Pb (KED) | 0.183 ppb             | 28,546 cps        |               |
| 209Bi (KED) | 87.993 %              | 3,007,487 cps     |               |
| 232Th (KED) | 0.027 ppb             | 6,425 cps         |               |
| 238U (KED)  | 0.007 ppb             | 1,877 cps         |               |

## Sample Summary

Instrument ID: iCAP Q

Analysis index: 34

Analysis name: 855013jian

Analysis started at: 11/3/2021 4:12:56 PM

User name: WINDOWS-UPCI4ER\Administrator

| Category    | Concentration average | Concentration RSD |
|-------------|-----------------------|-------------------|
| 6Li (KED)   | 102.395 %             |                   |
| 9Be (KED)   | 0.000 ppb             |                   |
| 11B (KED)   | 0.015 ppb             |                   |
| 24Mg (KED)  | 100.430 ppb           |                   |
| 27Al (KED)  | 133.475 ppb           |                   |
| 45Sc (KED)  | 100.062 %             |                   |
| 51V (KED)   | 0.237 ppb             |                   |
| 52Cr (KED)  | 0.857 ppb             |                   |
| 55Mn (KED)  | 4.897 ppb             |                   |
| 56Fe (KED)  | 140.579 ppb           |                   |
| 58Ni (KED)  | 0.985 ppb             |                   |
| 59Co (KED)  | 0.068 ppb             |                   |
| 63Cu (KED)  | 1.895 ppb             |                   |
| 64Zn (KED)  | 53.607 ppb            |                   |
| 69Ga (KED)  | 0.542 ppb             |                   |
| 75As (KED)  | 0.111 ppb             |                   |
| 80Se (KED)  | -0.153 ppb            |                   |
| 85Rb (KED)  | 0.496 ppb             |                   |
| 88Sr (KED)  | 1.496 ppb             |                   |
| 89Y (KED)   | 95.475 %              |                   |
| 107Ag (KED) | 0.016 ppb             |                   |
| 114Cd (KED) | 0.009 ppb             |                   |
| 115In (KED) | 91.084 %              |                   |
| 133Cs (KED) | 0.026 ppb             |                   |
| 138Ba (KED) | 1.673 ppb             |                   |
| 139La (KED) | 0.120 ppb             |                   |
| 140Ce (KED) | 0.235 ppb             |                   |
| 141Pr (KED) | 0.028 ppb             |                   |
| 142Nd (KED) | 0.155 ppb             |                   |
| 152Sm (KED) | 0.020 ppb             |                   |
| 153Eu (KED) | 0.004 ppb             |                   |
| 158Gd (KED) | 0.018 ppb             |                   |
| 159Tb (KED) | 97.220 %              |                   |
| 164Dy (KED) | 0.012 ppb             |                   |
| 166Er (KED) | 0.003 ppb             |                   |
| 169Tm (KED) | 0.001 ppb             |                   |
| 174Yb (KED) | 0.005 ppb             |                   |
| 175Lu (KED) | -0.011 ppb            |                   |
| 205Tl (KED) | 0.004 ppb             |                   |
| 208Pb (KED) | 0.219 ppb             |                   |
| 209Bi (KED) | 92.234 %              |                   |
| 232Th (KED) | 0.033 ppb             |                   |
| 238U (KED)  | 0.008 ppb             |                   |

| Category   | Concentration average | Intensity average | Intensity RSD |
|------------|-----------------------|-------------------|---------------|
| 6Li (KED)  | 102.395 %             | 2,804 cps         |               |
| 9Be (KED)  | 0.000 ppb             | 0 cps             |               |
| 11B (KED)  | 0.015 ppb             | 1,630 cps         |               |
| 24Mg (KED) | 100.430 ppb           | 55,054 cps        |               |
| 27Al (KED) | 133.475 ppb           | 18,116 cps        |               |

| Category    | Concentration average | Intensity average | Intensity RSD |
|-------------|-----------------------|-------------------|---------------|
| 45Sc (KED)  | 100.062 %             | 50,391 cps        |               |
| 51V (KED)   | 0.237 ppb             | 2,114 cps         |               |
| 52Cr (KED)  | 0.857 ppb             | 11,999 cps        |               |
| 55Mn (KED)  | 4.897 ppb             | 33,485 cps        |               |
| 56Fe (KED)  | 140.579 ppb           | 1,750,055 cps     |               |
| 58Ni (KED)  | 0.985 ppb             | 15,994 cps        |               |
| 59Co (KED)  | 0.068 ppb             | 1,810 cps         |               |
| 63Cu (KED)  | 1.895 ppb             | 37,727 cps        |               |
| 64Zn (KED)  | 53.607 ppb            | 278,509 cps       |               |
| 69Ga (KED)  | 0.542 ppb             | 3,571 cps         |               |
| 75As (KED)  | 0.111 ppb             | 170 cps           |               |
| 80Se (KED)  | -0.153 ppb            | 1,300 cps         |               |
| 85Rb (KED)  | 0.496 ppb             | 2,800 cps         |               |
| 88Sr (KED)  | 1.496 ppb             | 11,909 cps        |               |
| 89Y (KED)   | 95.475 %              | 424,841 cps       |               |
| 107Ag (KED) | 0.016 ppb             | 817 cps           |               |
| 114Cd (KED) | 0.009 ppb             | 203 cps           |               |
| 115In (KED) | 91.084 %              | 731,000 cps       |               |
| 133Cs (KED) | 0.026 ppb             | 747 cps           |               |
| 138Ba (KED) | 1.673 ppb             | 68,478 cps        |               |
| 139La (KED) | 0.120 ppb             | 10,288 cps        |               |
| 140Ce (KED) | 0.235 ppb             | 27,664 cps        |               |
| 141Pr (KED) | 0.028 ppb             | 3,310 cps         |               |
| 142Nd (KED) | 0.155 ppb             | 7,459 cps         |               |
| 152Sm (KED) | 0.020 ppb             | 830 cps           |               |
| 153Eu (KED) | 0.004 ppb             | 377 cps           |               |
| 158Gd (KED) | 0.018 ppb             | 1,020 cps         |               |
| 159Tb (KED) | 97.220 %              | 3,903,448 cps     |               |
| 164Dy (KED) | 0.012 ppb             | 753 cps           |               |
| 166Er (KED) | 0.003 ppb             | 563 cps           |               |
| 169Tm (KED) | 0.001 ppb             | 203 cps           |               |
| 174Yb (KED) | 0.005 ppb             | 437 cps           |               |
| 175Lu (KED) | -0.011 ppb            | 13,130 cps        |               |
| 205Tl (KED) | 0.004 ppb             | 750 cps           |               |
| 208Pb (KED) | 0.219 ppb             | 33,966 cps        |               |
| 209Bi (KED) | 92.234 %              | 3,152,436 cps     |               |
| 232Th (KED) | 0.033 ppb             | 8,153 cps         |               |
| 238U (KED)  | 0.008 ppb             | 2,144 cps         |               |

## Sample Summary

Instrument ID: iCAP Q

Analysis index: 35

Analysis name: 80138jian

Analysis started at: 11/3/2021 4:14:59 PM

User name: WINDOWS-UPCI4ER\Administrator

| Category    | Concentration average | Concentration RSD |
|-------------|-----------------------|-------------------|
| 6Li (KED)   | 104.343 %             |                   |
| 9Be (KED)   | 0.000 ppb             |                   |
| 11B (KED)   | 2.992 ppb             |                   |
| 24Mg (KED)  | 82.565 ppb            |                   |
| 27Al (KED)  | 113.375 ppb           |                   |
| 45Sc (KED)  | 99.723 %              |                   |
| 51V (KED)   | 0.239 ppb             |                   |
| 52Cr (KED)  | 0.646 ppb             |                   |
| 55Mn (KED)  | 4.257 ppb             |                   |
| 56Fe (KED)  | 142.713 ppb           |                   |
| 58Ni (KED)  | 1.135 ppb             |                   |
| 59Co (KED)  | 0.069 ppb             |                   |
| 63Cu (KED)  | 2.367 ppb             |                   |
| 64Zn (KED)  | 50.001 ppb            |                   |
| 69Ga (KED)  | 0.501 ppb             |                   |
| 75As (KED)  | 0.095 ppb             |                   |
| 80Se (KED)  | -0.061 ppb            |                   |
| 85Rb (KED)  | 0.782 ppb             |                   |
| 88Sr (KED)  | 1.208 ppb             |                   |
| 89Y (KED)   | 93.383 %              |                   |
| 107Ag (KED) | 0.018 ppb             |                   |
| 114Cd (KED) | 0.008 ppb             |                   |
| 115In (KED) | 88.889 %              |                   |
| 133Cs (KED) | 0.025 ppb             |                   |
| 138Ba (KED) | 1.528 ppb             |                   |
| 139La (KED) | 0.109 ppb             |                   |
| 140Ce (KED) | 0.223 ppb             |                   |
| 141Pr (KED) | 0.024 ppb             |                   |
| 142Nd (KED) | 0.133 ppb             |                   |
| 152Sm (KED) | 0.017 ppb             |                   |
| 153Eu (KED) | 0.003 ppb             |                   |
| 158Gd (KED) | 0.017 ppb             |                   |
| 159Tb (KED) | 95.584 %              |                   |
| 164Dy (KED) | 0.012 ppb             |                   |
| 166Er (KED) | 0.003 ppb             |                   |
| 169Tm (KED) | 0.001 ppb             |                   |
| 174Yb (KED) | 0.004 ppb             |                   |
| 175Lu (KED) | -0.017 ppb            |                   |
| 205Tl (KED) | 0.004 ppb             |                   |
| 208Pb (KED) | 0.247 ppb             |                   |
| 209Bi (KED) | 89.834 %              |                   |
| 232Th (KED) | 0.030 ppb             |                   |
| 238U (KED)  | 0.008 ppb             |                   |

| Category   | Concentration average | Intensity average | Intensity RSD |
|------------|-----------------------|-------------------|---------------|
| 6Li (KED)  | 104.343 %             | 2,857 cps         |               |
| 9Be (KED)  | 0.000 ppb             | 0 cps             |               |
| 11B (KED)  | 2.992 ppb             | 1,847 cps         |               |
| 24Mg (KED) | 82.565 ppb            | 46,175 cps        |               |
| 27Al (KED) | 113.375 ppb           | 15,383 cps        |               |

| Category    | Concentration average | Intensity average | Intensity RSD |
|-------------|-----------------------|-------------------|---------------|
| 45Sc (KED)  | 99.723 %              | 50,221 cps        |               |
| 51V (KED)   | 0.239 ppb             | 2,120 cps         |               |
| 52Cr (KED)  | 0.646 ppb             | 9,040 cps         |               |
| 55Mn (KED)  | 4.257 ppb             | 29,020 cps        |               |
| 56Fe (KED)  | 142.713 ppb           | 1,770,537 cps     |               |
| 58Ni (KED)  | 1.135 ppb             | 18,333 cps        |               |
| 59Co (KED)  | 0.069 ppb             | 1,830 cps         |               |
| 63Cu (KED)  | 2.367 ppb             | 45,874 cps        |               |
| 64Zn (KED)  | 50.001 ppb            | 254,829 cps       |               |
| 69Ga (KED)  | 0.501 ppb             | 3,240 cps         |               |
| 75As (KED)  | 0.095 ppb             | 143 cps           |               |
| 80Se (KED)  | -0.061 ppb            | 1,310 cps         |               |
| 85Rb (KED)  | 0.782 ppb             | 4,304 cps         |               |
| 88Sr (KED)  | 1.208 ppb             | 9,447 cps         |               |
| 89Y (KED)   | 93.383 %              | 415,529 cps       |               |
| 107Ag (KED) | 0.018 ppb             | 887 cps           |               |
| 114Cd (KED) | 0.008 ppb             | 177 cps           |               |
| 115In (KED) | 88.889 %              | 713,381 cps       |               |
| 133Cs (KED) | 0.025 ppb             | 697 cps           |               |
| 138Ba (KED) | 1.528 ppb             | 61,790 cps        |               |
| 139La (KED) | 0.109 ppb             | 9,173 cps         |               |
| 140Ce (KED) | 0.223 ppb             | 25,810 cps        |               |
| 141Pr (KED) | 0.024 ppb             | 2,774 cps         |               |
| 142Nd (KED) | 0.133 ppb             | 6,305 cps         |               |
| 152Sm (KED) | 0.017 ppb             | 703 cps           |               |
| 153Eu (KED) | 0.003 ppb             | 283 cps           |               |
| 158Gd (KED) | 0.017 ppb             | 917 cps           |               |
| 159Tb (KED) | 95.584 %              | 3,837,760 cps     |               |
| 164Dy (KED) | 0.012 ppb             | 753 cps           |               |
| 166Er (KED) | 0.003 ppb             | 547 cps           |               |
| 169Tm (KED) | 0.001 ppb             | 187 cps           |               |
| 174Yb (KED) | 0.004 ppb             | 380 cps           |               |
| 175Lu (KED) | -0.017 ppb            | 12,026 cps        |               |
| 205Tl (KED) | 0.004 ppb             | 610 cps           |               |
| 208Pb (KED) | 0.247 ppb             | 36,156 cps        |               |
| 209Bi (KED) | 89.834 %              | 3,070,398 cps     |               |
| 232Th (KED) | 0.030 ppb             | 7,079 cps         |               |
| 238U (KED)  | 0.008 ppb             | 2,107 cps         |               |

## Sample Summary

Instrument ID: iCAP Q

Analysis index: 36

Analysis name: 804281 duan jian

Analysis started at: 11/3/2021 4:17:09 PM

User name: WINDOWS-UPCI4ER\Administrator

| Category    | Concentration average | Concentration RSD |
|-------------|-----------------------|-------------------|
| 6Li (KED)   | 108.970 %             |                   |
| 9Be (KED)   | 0.000 ppb             |                   |
| 11B (KED)   | -9.678 ppb            |                   |
| 24Mg (KED)  | 137.074 ppb           |                   |
| 27Al (KED)  | 182.225 ppb           |                   |
| 45Sc (KED)  | 97.922 %              |                   |
| 51V (KED)   | 0.341 ppb             |                   |
| 52Cr (KED)  | 0.961 ppb             |                   |
| 55Mn (KED)  | 7.551 ppb             |                   |
| 56Fe (KED)  | 194.093 ppb           |                   |
| 58Ni (KED)  | 0.951 ppb             |                   |
| 59Co (KED)  | 0.102 ppb             |                   |
| 63Cu (KED)  | 2.426 ppb             |                   |
| 64Zn (KED)  | 54.292 ppb            |                   |
| 69Ga (KED)  | 0.828 ppb             |                   |
| 75As (KED)  | 0.122 ppb             |                   |
| 80Se (KED)  | -0.391 ppb            |                   |
| 85Rb (KED)  | 0.581 ppb             |                   |
| 88Sr (KED)  | 2.205 ppb             |                   |
| 89Y (KED)   | 95.527 %              |                   |
| 107Ag (KED) | 0.012 ppb             |                   |
| 114Cd (KED) | 0.018 ppb             |                   |
| 115In (KED) | 92.929 %              |                   |
| 133Cs (KED) | 0.035 ppb             |                   |
| 138Ba (KED) | 2.516 ppb             |                   |
| 139La (KED) | 0.160 ppb             |                   |
| 140Ce (KED) | 0.330 ppb             |                   |
| 141Pr (KED) | 0.039 ppb             |                   |
| 142Nd (KED) | 0.208 ppb             |                   |
| 152Sm (KED) | 0.026 ppb             |                   |
| 153Eu (KED) | 0.006 ppb             |                   |
| 158Gd (KED) | 0.026 ppb             |                   |
| 159Tb (KED) | 94.598 %              |                   |
| 164Dy (KED) | 0.018 ppb             |                   |
| 166Er (KED) | 0.006 ppb             |                   |
| 169Tm (KED) | 0.001 ppb             |                   |
| 174Yb (KED) | 0.007 ppb             |                   |
| 175Lu (KED) | -0.012 ppb            |                   |
| 205Tl (KED) | 0.006 ppb             |                   |
| 208Pb (KED) | 0.294 ppb             |                   |
| 209Bi (KED) | 90.840 %              |                   |
| 232Th (KED) | 0.045 ppb             |                   |
| 238U (KED)  | 0.010 ppb             |                   |

| Category   | Concentration average | Intensity average | Intensity RSD |
|------------|-----------------------|-------------------|---------------|
| 6Li (KED)  | 108.970 %             | 2,984 cps         |               |
| 9Be (KED)  | 0.000 ppb             | 0 cps             |               |
| 11B (KED)  | -9.678 ppb            | 1,103 cps         |               |
| 24Mg (KED) | 137.074 ppb           | 79,855 cps        |               |
| 27Al (KED) | 182.225 ppb           | 24,093 cps        |               |

| Category    | Concentration average | Intensity average | Intensity RSD |
|-------------|-----------------------|-------------------|---------------|
| 45Sc (KED)  | 97.922 %              | 49,314 cps        |               |
| 51V (KED)   | 0.341 ppb             | 2,964 cps         |               |
| 52Cr (KED)  | 0.961 ppb             | 13,157 cps        |               |
| 55Mn (KED)  | 7.551 ppb             | 50,479 cps        |               |
| 56Fe (KED)  | 194.093 ppb           | 2,362,853 cps     |               |
| 58Ni (KED)  | 0.951 ppb             | 15,133 cps        |               |
| 59Co (KED)  | 0.102 ppb             | 2,627 cps         |               |
| 63Cu (KED)  | 2.426 ppb             | 48,062 cps        |               |
| 64Zn (KED)  | 54.292 ppb            | 282,079 cps       |               |
| 69Ga (KED)  | 0.828 ppb             | 5,371 cps         |               |
| 75As (KED)  | 0.122 ppb             | 187 cps           |               |
| 80Se (KED)  | -0.391 ppb            | 1,200 cps         |               |
| 85Rb (KED)  | 0.581 ppb             | 3,280 cps         |               |
| 88Sr (KED)  | 2.205 ppb             | 17,469 cps        |               |
| 89Y (KED)   | 95.527 %              | 425,071 cps       |               |
| 107Ag (KED) | 0.012 ppb             | 637 cps           |               |
| 114Cd (KED) | 0.018 ppb             | 377 cps           |               |
| 115In (KED) | 92.929 %              | 745,805 cps       |               |
| 133Cs (KED) | 0.035 ppb             | 1,003 cps         |               |
| 138Ba (KED) | 2.516 ppb             | 98,507 cps        |               |
| 139La (KED) | 0.160 ppb             | 13,347 cps        |               |
| 140Ce (KED) | 0.330 ppb             | 37,292 cps        |               |
| 141Pr (KED) | 0.039 ppb             | 4,431 cps         |               |
| 142Nd (KED) | 0.208 ppb             | 9,640 cps         |               |
| 152Sm (KED) | 0.026 ppb             | 1,043 cps         |               |
| 153Eu (KED) | 0.006 ppb             | 463 cps           |               |
| 158Gd (KED) | 0.026 ppb             | 1,420 cps         |               |
| 159Tb (KED) | 94.598 %              | 3,798,163 cps     |               |
| 164Dy (KED) | 0.018 ppb             | 1,090 cps         |               |
| 166Er (KED) | 0.006 ppb             | 767 cps           |               |
| 169Tm (KED) | 0.001 ppb             | 237 cps           |               |
| 174Yb (KED) | 0.007 ppb             | 620 cps           |               |
| 175Lu (KED) | -0.012 ppb            | 12,633 cps        |               |
| 205Tl (KED) | 0.006 ppb             | 930 cps           |               |
| 208Pb (KED) | 0.294 ppb             | 41,847 cps        |               |
| 209Bi (KED) | 90.840 %              | 3,104,782 cps     |               |
| 232Th (KED) | 0.045 ppb             | 10,791 cps        |               |
| 238U (KED)  | 0.010 ppb             | 2,817 cps         |               |

## Sample Summary

Instrument ID: iCAP Q

Analysis index: 37

Analysis name: 853057duan jian

Analysis started at: 11/3/2021 4:19:04 PM

User name: WINDOWS-UPCI4ER\Administrator

| Category    | Concentration average | Concentration RSD |
|-------------|-----------------------|-------------------|
| 6Li (KED)   | 110.310 %             |                   |
| 9Be (KED)   | 0.021 ppb             |                   |
| 11B (KED)   | -4.423 ppb            |                   |
| 24Mg (KED)  | 139.190 ppb           |                   |
| 27Al (KED)  | 306.113 ppb           |                   |
| 45Sc (KED)  | 96.959 %              |                   |
| 51V (KED)   | 0.528 ppb             |                   |
| 52Cr (KED)  | 1.175 ppb             |                   |
| 55Mn (KED)  | 8.338 ppb             |                   |
| 56Fe (KED)  | 300.609 ppb           |                   |
| 58Ni (KED)  | 1.634 ppb             |                   |
| 59Co (KED)  | 0.139 ppb             |                   |
| 63Cu (KED)  | 2.955 ppb             |                   |
| 64Zn (KED)  | 51.481 ppb            |                   |
| 69Ga (KED)  | 0.971 ppb             |                   |
| 75As (KED)  | 0.207 ppb             |                   |
| 80Se (KED)  | -0.367 ppb            |                   |
| 85Rb (KED)  | 0.759 ppb             |                   |
| 88Sr (KED)  | 1.936 ppb             |                   |
| 89Y (KED)   | 95.806 %              |                   |
| 107Ag (KED) | 0.011 ppb             |                   |
| 114Cd (KED) | 0.014 ppb             |                   |
| 115In (KED) | 91.395 %              |                   |
| 133Cs (KED) | 0.055 ppb             |                   |
| 138Ba (KED) | 3.170 ppb             |                   |
| 139La (KED) | 0.264 ppb             |                   |
| 140Ce (KED) | 0.538 ppb             |                   |
| 141Pr (KED) | 0.061 ppb             |                   |
| 142Nd (KED) | 0.347 ppb             |                   |
| 152Sm (KED) | 0.046 ppb             |                   |
| 153Eu (KED) | 0.009 ppb             |                   |
| 158Gd (KED) | 0.040 ppb             |                   |
| 159Tb (KED) | 95.715 %              |                   |
| 164Dy (KED) | 0.030 ppb             |                   |
| 166Er (KED) | 0.010 ppb             |                   |
| 169Tm (KED) | 0.002 ppb             |                   |
| 174Yb (KED) | 0.010 ppb             |                   |
| 175Lu (KED) | -0.009 ppb            |                   |
| 205Tl (KED) | 0.006 ppb             |                   |
| 208Pb (KED) | 0.471 ppb             |                   |
| 209Bi (KED) | 93.087 %              |                   |
| 232Th (KED) | 0.076 ppb             |                   |
| 238U (KED)  | 0.016 ppb             |                   |

| Category   | Concentration average | Intensity average | Intensity RSD |
|------------|-----------------------|-------------------|---------------|
| 6Li (KED)  | 110.310 %             | 3,020 cps         |               |
| 9Be (KED)  | 0.021 ppb             | 3 cps             |               |
| 11B (KED)  | -4.423 ppb            | 1,463 cps         |               |
| 24Mg (KED) | 139.190 ppb           | 82,079 cps        |               |
| 27Al (KED) | 306.113 ppb           | 39,870 cps        |               |

| Category    | Concentration average | Intensity average | Intensity RSD |
|-------------|-----------------------|-------------------|---------------|
| 45Sc (KED)  | 96.959 %              | 48,829 cps        |               |
| 51V (KED)   | 0.528 ppb             | 4,544 cps         |               |
| 52Cr (KED)  | 1.175 ppb             | 15,907 cps        |               |
| 55Mn (KED)  | 8.338 ppb             | 55,182 cps        |               |
| 56Fe (KED)  | 300.609 ppb           | 3,621,089 cps     |               |
| 58Ni (KED)  | 1.634 ppb             | 25,519 cps        |               |
| 59Co (KED)  | 0.139 ppb             | 3,524 cps         |               |
| 63Cu (KED)  | 2.955 ppb             | 58,514 cps        |               |
| 64Zn (KED)  | 51.481 ppb            | 268,845 cps       |               |
| 69Ga (KED)  | 0.971 ppb             | 6,285 cps         |               |
| 75As (KED)  | 0.207 ppb             | 310 cps           |               |
| 80Se (KED)  | -0.367 ppb            | 1,213 cps         |               |
| 85Rb (KED)  | 0.759 ppb             | 4,287 cps         |               |
| 88Sr (KED)  | 1.936 ppb             | 15,413 cps        |               |
| 89Y (KED)   | 95.806 %              | 426,311 cps       |               |
| 107Ag (KED) | 0.011 ppb             | 557 cps           |               |
| 114Cd (KED) | 0.014 ppb             | 293 cps           |               |
| 115In (KED) | 91.395 %              | 733,491 cps       |               |
| 133Cs (KED) | 0.055 ppb             | 1,523 cps         |               |
| 138Ba (KED) | 3.170 ppb             | 124,682 cps       |               |
| 139La (KED) | 0.264 ppb             | 22,206 cps        |               |
| 140Ce (KED) | 0.538 ppb             | 60,677 cps        |               |
| 141Pr (KED) | 0.061 ppb             | 7,025 cps         |               |
| 142Nd (KED) | 0.347 ppb             | 16,127 cps        |               |
| 152Sm (KED) | 0.046 ppb             | 1,870 cps         |               |
| 153Eu (KED) | 0.009 ppb             | 777 cps           |               |
| 158Gd (KED) | 0.040 ppb             | 2,190 cps         |               |
| 159Tb (KED) | 95.715 %              | 3,843,027 cps     |               |
| 164Dy (KED) | 0.030 ppb             | 1,803 cps         |               |
| 166Er (KED) | 0.010 ppb             | 1,070 cps         |               |
| 169Tm (KED) | 0.002 ppb             | 447 cps           |               |
| 174Yb (KED) | 0.010 ppb             | 870 cps           |               |
| 175Lu (KED) | -0.009 ppb            | 13,160 cps        |               |
| 205Tl (KED) | 0.006 ppb             | 1,023 cps         |               |
| 208Pb (KED) | 0.471 ppb             | 63,247 cps        |               |
| 209Bi (KED) | 93.087 %              | 3,181,569 cps     |               |
| 232Th (KED) | 0.076 ppb             | 18,280 cps        |               |
| 238U (KED)  | 0.016 ppb             | 4,484 cps         |               |

## Sample Summary

Instrument ID: iCAP Q

Analysis index: 38

Analysis name: 315042603860482jian

Analysis started at: 11/3/2021 4:21:00 PM

User name: WINDOWS-UPCI4ER\Administrator

| Category    | Concentration average | Concentration RSD |
|-------------|-----------------------|-------------------|
| 6Li (KED)   | 108.605 %             |                   |
| 9Be (KED)   | 0.043 ppb             |                   |
| 11B (KED)   | -4.691 ppb            |                   |
| 24Mg (KED)  | 206.043 ppb           |                   |
| 27Al (KED)  | 352.611 ppb           |                   |
| 45Sc (KED)  | 99.165 %              |                   |
| 51V (KED)   | 0.638 ppb             |                   |
| 52Cr (KED)  | 0.892 ppb             |                   |
| 55Mn (KED)  | 7.941 ppb             |                   |
| 56Fe (KED)  | 335.607 ppb           |                   |
| 58Ni (KED)  | 1.583 ppb             |                   |
| 59Co (KED)  | 0.151 ppb             |                   |
| 63Cu (KED)  | 4.216 ppb             |                   |
| 64Zn (KED)  | 57.104 ppb            |                   |
| 69Ga (KED)  | 1.404 ppb             |                   |
| 75As (KED)  | 0.359 ppb             |                   |
| 80Se (KED)  | -0.126 ppb            |                   |
| 85Rb (KED)  | 1.259 ppb             |                   |
| 88Sr (KED)  | 3.317 ppb             |                   |
| 89Y (KED)   | 94.883 %              |                   |
| 107Ag (KED) | 0.023 ppb             |                   |
| 114Cd (KED) | 0.017 ppb             |                   |
| 115In (KED) | 90.841 %              |                   |
| 133Cs (KED) | 0.056 ppb             |                   |
| 138Ba (KED) | 4.354 ppb             |                   |
| 139La (KED) | 0.264 ppb             |                   |
| 140Ce (KED) | 0.544 ppb             |                   |
| 141Pr (KED) | 0.063 ppb             |                   |
| 142Nd (KED) | 0.349 ppb             |                   |
| 152Sm (KED) | 0.047 ppb             |                   |
| 153Eu (KED) | 0.011 ppb             |                   |
| 158Gd (KED) | 0.047 ppb             |                   |
| 159Tb (KED) | 96.838 %              |                   |
| 164Dy (KED) | 0.034 ppb             |                   |
| 166Er (KED) | 0.017 ppb             |                   |
| 169Tm (KED) | 0.002 ppb             |                   |
| 174Yb (KED) | 0.013 ppb             |                   |
| 175Lu (KED) | -0.010 ppb            |                   |
| 205Tl (KED) | 0.005 ppb             |                   |
| 208Pb (KED) | 0.358 ppb             |                   |
| 209Bi (KED) | 91.116 %              |                   |
| 232Th (KED) | 0.078 ppb             |                   |
| 238U (KED)  | 0.015 ppb             |                   |

| Category   | Concentration average | Intensity average | Intensity RSD |
|------------|-----------------------|-------------------|---------------|
| 6Li (KED)  | 108.605 %             | 2,974 cps         |               |
| 9Be (KED)  | 0.043 ppb             | 7 cps             |               |
| 11B (KED)  | -4.691 ppb            | 1,423 cps         |               |
| 24Mg (KED) | 206.043 ppb           | 119,475 cps       |               |
| 27Al (KED) | 352.611 ppb           | 46,925 cps        |               |

| Category    | Concentration average | Intensity average | Intensity RSD |
|-------------|-----------------------|-------------------|---------------|
| 45Sc (KED)  | 99.165 %              | 49,940 cps        |               |
| 51V (KED)   | 0.638 ppb             | 5,615 cps         |               |
| 52Cr (KED)  | 0.892 ppb             | 12,376 cps        |               |
| 55Mn (KED)  | 7.941 ppb             | 53,755 cps        |               |
| 56Fe (KED)  | 335.607 ppb           | 4,134,121 cps     |               |
| 58Ni (KED)  | 1.583 ppb             | 25,292 cps        |               |
| 59Co (KED)  | 0.151 ppb             | 3,921 cps         |               |
| 63Cu (KED)  | 4.216 ppb             | 82,270 cps        |               |
| 64Zn (KED)  | 57.104 ppb            | 294,107 cps       |               |
| 69Ga (KED)  | 1.404 ppb             | 8,927 cps         |               |
| 75As (KED)  | 0.359 ppb             | 523 cps           |               |
| 80Se (KED)  | -0.126 ppb            | 1,303 cps         |               |
| 85Rb (KED)  | 1.259 ppb             | 7,035 cps         |               |
| 88Sr (KED)  | 3.317 ppb             | 26,007 cps        |               |
| 89Y (KED)   | 94.883 %              | 422,205 cps       |               |
| 107Ag (KED) | 0.023 ppb             | 1,163 cps         |               |
| 114Cd (KED) | 0.017 ppb             | 340 cps           |               |
| 115In (KED) | 90.841 %              | 729,046 cps       |               |
| 133Cs (KED) | 0.056 ppb             | 1,537 cps         |               |
| 138Ba (KED) | 4.354 ppb             | 171,953 cps       |               |
| 139La (KED) | 0.264 ppb             | 22,517 cps        |               |
| 140Ce (KED) | 0.544 ppb             | 62,138 cps        |               |
| 141Pr (KED) | 0.063 ppb             | 7,255 cps         |               |
| 142Nd (KED) | 0.349 ppb             | 16,401 cps        |               |
| 152Sm (KED) | 0.047 ppb             | 1,913 cps         |               |
| 153Eu (KED) | 0.011 ppb             | 883 cps           |               |
| 158Gd (KED) | 0.047 ppb             | 2,610 cps         |               |
| 159Tb (KED) | 96.838 %              | 3,888,110 cps     |               |
| 164Dy (KED) | 0.034 ppb             | 2,104 cps         |               |
| 166Er (KED) | 0.017 ppb             | 1,557 cps         |               |
| 169Tm (KED) | 0.002 ppb             | 530 cps           |               |
| 174Yb (KED) | 0.013 ppb             | 1,160 cps         |               |
| 175Lu (KED) | -0.010 ppb            | 13,150 cps        |               |
| 205Tl (KED) | 0.005 ppb             | 757 cps           |               |
| 208Pb (KED) | 0.358 ppb             | 49,174 cps        |               |
| 209Bi (KED) | 91.116 %              | 3,114,225 cps     |               |
| 232Th (KED) | 0.078 ppb             | 18,384 cps        |               |
| 238U (KED)  | 0.015 ppb             | 4,047 cps         |               |

## Sample Summary

Instrument ID: iCAP Q

Analysis index: 39

Analysis name: 315047603860466jian

Analysis started at: 11/3/2021 4:22:59 PM

User name: WINDOWS-UPCI4ER\Administrator

| Category    | Concentration average | Concentration RSD |
|-------------|-----------------------|-------------------|
| 6Li (KED)   | 105.439 %             |                   |
| 9Be (KED)   | 0.022 ppb             |                   |
| 11B (KED)   | -13.870 ppb           |                   |
| 24Mg (KED)  | 203.875 ppb           |                   |
| 27Al (KED)  | 319.653 ppb           |                   |
| 45Sc (KED)  | 99.098 %              |                   |
| 51V (KED)   | 0.645 ppb             |                   |
| 52Cr (KED)  | 0.971 ppb             |                   |
| 55Mn (KED)  | 7.243 ppb             |                   |
| 56Fe (KED)  | 303.359 ppb           |                   |
| 58Ni (KED)  | 1.513 ppb             |                   |
| 59Co (KED)  | 0.149 ppb             |                   |
| 63Cu (KED)  | 1.850 ppb             |                   |
| 64Zn (KED)  | 64.540 ppb            |                   |
| 69Ga (KED)  | 0.970 ppb             |                   |
| 75As (KED)  | 0.314 ppb             |                   |
| 80Se (KED)  | -0.029 ppb            |                   |
| 85Rb (KED)  | 1.187 ppb             |                   |
| 88Sr (KED)  | 2.604 ppb             |                   |
| 89Y (KED)   | 95.756 %              |                   |
| 107Ag (KED) | 0.012 ppb             |                   |
| 114Cd (KED) | 0.017 ppb             |                   |
| 115In (KED) | 90.689 %              |                   |
| 133Cs (KED) | 0.059 ppb             |                   |
| 138Ba (KED) | 3.181 ppb             |                   |
| 139La (KED) | 0.253 ppb             |                   |
| 140Ce (KED) | 0.543 ppb             |                   |
| 141Pr (KED) | 0.064 ppb             |                   |
| 142Nd (KED) | 0.336 ppb             |                   |
| 152Sm (KED) | 0.048 ppb             |                   |
| 153Eu (KED) | 0.007 ppb             |                   |
| 158Gd (KED) | 0.041 ppb             |                   |
| 159Tb (KED) | 93.364 %              |                   |
| 164Dy (KED) | 0.031 ppb             |                   |
| 166Er (KED) | 0.014 ppb             |                   |
| 169Tm (KED) | 0.002 ppb             |                   |
| 174Yb (KED) | 0.013 ppb             |                   |
| 175Lu (KED) | -0.010 ppb            |                   |
| 205Tl (KED) | 0.006 ppb             |                   |
| 208Pb (KED) | 0.327 ppb             |                   |
| 209Bi (KED) | 88.935 %              |                   |
| 232Th (KED) | 0.081 ppb             |                   |
| 238U (KED)  | 0.014 ppb             |                   |

| Category   | Concentration average | Intensity average | Intensity RSD |
|------------|-----------------------|-------------------|---------------|
| 6Li (KED)  | 105.439 %             | 2,887 cps         |               |
| 9Be (KED)  | 0.022 ppb             | 3 cps             |               |
| 11B (KED)  | -13.870 ppb           | 803 cps           |               |
| 24Mg (KED) | 203.875 ppb           | 114,776 cps       |               |
| 27Al (KED) | 319.653 ppb           | 42,539 cps        |               |

| Category    | Concentration average | Intensity average | Intensity RSD |
|-------------|-----------------------|-------------------|---------------|
| 45Sc (KED)  | 99.098 %              | 49,906 cps        |               |
| 51V (KED)   | 0.645 ppb             | 5,668 cps         |               |
| 52Cr (KED)  | 0.971 ppb             | 13,451 cps        |               |
| 55Mn (KED)  | 7.243 ppb             | 49,006 cps        |               |
| 56Fe (KED)  | 303.359 ppb           | 3,734,817 cps     |               |
| 58Ni (KED)  | 1.513 ppb             | 24,180 cps        |               |
| 59Co (KED)  | 0.149 ppb             | 3,864 cps         |               |
| 63Cu (KED)  | 1.850 ppb             | 36,971 cps        |               |
| 64Zn (KED)  | 64.540 ppb            | 333,985 cps       |               |
| 69Ga (KED)  | 0.970 ppb             | 6,275 cps         |               |
| 75As (KED)  | 0.314 ppb             | 463 cps           |               |
| 80Se (KED)  | -0.029 ppb            | 1,357 cps         |               |
| 85Rb (KED)  | 1.187 ppb             | 6,692 cps         |               |
| 88Sr (KED)  | 2.604 ppb             | 20,647 cps        |               |
| 89Y (KED)   | 95.756 %              | 426,089 cps       |               |
| 107Ag (KED) | 0.012 ppb             | 600 cps           |               |
| 114Cd (KED) | 0.017 ppb             | 337 cps           |               |
| 115In (KED) | 90.689 %              | 727,829 cps       |               |
| 133Cs (KED) | 0.059 ppb             | 1,630 cps         |               |
| 138Ba (KED) | 3.181 ppb             | 122,044 cps       |               |
| 139La (KED) | 0.253 ppb             | 20,757 cps        |               |
| 140Ce (KED) | 0.543 ppb             | 59,730 cps        |               |
| 141Pr (KED) | 0.064 ppb             | 7,115 cps         |               |
| 142Nd (KED) | 0.336 ppb             | 15,243 cps        |               |
| 152Sm (KED) | 0.048 ppb             | 1,897 cps         |               |
| 153Eu (KED) | 0.007 ppb             | 543 cps           |               |
| 158Gd (KED) | 0.041 ppb             | 2,177 cps         |               |
| 159Tb (KED) | 93.364 %              | 3,748,641 cps     |               |
| 164Dy (KED) | 0.031 ppb             | 1,857 cps         |               |
| 166Er (KED) | 0.014 ppb             | 1,340 cps         |               |
| 169Tm (KED) | 0.002 ppb             | 550 cps           |               |
| 174Yb (KED) | 0.013 ppb             | 1,050 cps         |               |
| 175Lu (KED) | -0.010 ppb            | 12,753 cps        |               |
| 205Tl (KED) | 0.006 ppb             | 927 cps           |               |
| 208Pb (KED) | 0.327 ppb             | 44,653 cps        |               |
| 209Bi (KED) | 88.935 %              | 3,039,661 cps     |               |
| 232Th (KED) | 0.081 ppb             | 18,651 cps        |               |
| 238U (KED)  | 0.014 ppb             | 3,614 cps         |               |

## Sample Summary

Instrument ID: iCAP Q

Analysis index: 40

Analysis name: 315042603860435jian

Analysis started at: 11/3/2021 4:24:49 PM

User name: WINDOWS-UPCI4ER\Administrator

| Category    | Concentration average | Concentration RSD |
|-------------|-----------------------|-------------------|
| 6Li (KED)   | 114.937 %             |                   |
| 9Be (KED)   | 0.040 ppb             |                   |
| 11B (KED)   | -12.789 ppb           |                   |
| 24Mg (KED)  | 190.863 ppb           |                   |
| 27Al (KED)  | 324.452 ppb           |                   |
| 45Sc (KED)  | 102.979 %             |                   |
| 51V (KED)   | 0.650 ppb             |                   |
| 52Cr (KED)  | 1.118 ppb             |                   |
| 55Mn (KED)  | 7.611 ppb             |                   |
| 56Fe (KED)  | 308.739 ppb           |                   |
| 58Ni (KED)  | 1.416 ppb             |                   |
| 59Co (KED)  | 0.142 ppb             |                   |
| 63Cu (KED)  | 2.062 ppb             |                   |
| 64Zn (KED)  | 63.305 ppb            |                   |
| 69Ga (KED)  | 1.230 ppb             |                   |
| 75As (KED)  | 0.270 ppb             |                   |
| 80Se (KED)  | -0.195 ppb            |                   |
| 85Rb (KED)  | 0.854 ppb             |                   |
| 88Sr (KED)  | 3.074 ppb             |                   |
| 89Y (KED)   | 95.057 %              |                   |
| 107Ag (KED) | 0.013 ppb             |                   |
| 114Cd (KED) | 0.017 ppb             |                   |
| 115In (KED) | 91.353 %              |                   |
| 133Cs (KED) | 0.063 ppb             |                   |
| 138Ba (KED) | 3.898 ppb             |                   |
| 139La (KED) | 0.321 ppb             |                   |
| 140Ce (KED) | 0.660 ppb             |                   |
| 141Pr (KED) | 0.080 ppb             |                   |
| 142Nd (KED) | 0.421 ppb             |                   |
| 152Sm (KED) | 0.057 ppb             |                   |
| 153Eu (KED) | 0.009 ppb             |                   |
| 158Gd (KED) | 0.049 ppb             |                   |
| 159Tb (KED) | 94.488 %              |                   |
| 164Dy (KED) | 0.034 ppb             |                   |
| 166Er (KED) | 0.015 ppb             |                   |
| 169Tm (KED) | 0.002 ppb             |                   |
| 174Yb (KED) | 0.014 ppb             |                   |
| 175Lu (KED) | -0.010 ppb            |                   |
| 205Tl (KED) | 0.005 ppb             |                   |
| 208Pb (KED) | 0.305 ppb             |                   |
| 209Bi (KED) | 90.105 %              |                   |
| 232Th (KED) | 0.210 ppb             |                   |
| 238U (KED)  | 0.014 ppb             |                   |

| Category   | Concentration average | Intensity average | Intensity RSD |
|------------|-----------------------|-------------------|---------------|
| 6Li (KED)  | 114.937 %             | 3,147 cps         |               |
| 9Be (KED)  | 0.040 ppb             | 7 cps             |               |
| 11B (KED)  | -12.789 ppb           | 950 cps           |               |
| 24Mg (KED) | 190.863 ppb           | 117,150 cps       |               |
| 27Al (KED) | 324.452 ppb           | 44,864 cps        |               |

| Category    | Concentration average | Intensity average | Intensity RSD |
|-------------|-----------------------|-------------------|---------------|
| 45Sc (KED)  | 102.979 %             | 51,861 cps        |               |
| 51V (KED)   | 0.650 ppb             | 5,938 cps         |               |
| 52Cr (KED)  | 1.118 ppb             | 16,087 cps        |               |
| 55Mn (KED)  | 7.611 ppb             | 53,508 cps        |               |
| 56Fe (KED)  | 308.739 ppb           | 3,949,836 cps     |               |
| 58Ni (KED)  | 1.416 ppb             | 23,525 cps        |               |
| 59Co (KED)  | 0.142 ppb             | 3,847 cps         |               |
| 63Cu (KED)  | 2.062 ppb             | 40,793 cps        |               |
| 64Zn (KED)  | 63.305 ppb            | 325,417 cps       |               |
| 69Ga (KED)  | 1.230 ppb             | 7,856 cps         |               |
| 75As (KED)  | 0.270 ppb             | 397 cps           |               |
| 80Se (KED)  | -0.195 ppb            | 1,277 cps         |               |
| 85Rb (KED)  | 0.854 ppb             | 4,784 cps         |               |
| 88Sr (KED)  | 3.074 ppb             | 24,160 cps        |               |
| 89Y (KED)   | 95.057 %              | 422,979 cps       |               |
| 107Ag (KED) | 0.013 ppb             | 667 cps           |               |
| 114Cd (KED) | 0.017 ppb             | 350 cps           |               |
| 115In (KED) | 91.353 %              | 733,156 cps       |               |
| 133Cs (KED) | 0.063 ppb             | 1,747 cps         |               |
| 138Ba (KED) | 3.898 ppb             | 150,581 cps       |               |
| 139La (KED) | 0.321 ppb             | 26,622 cps        |               |
| 140Ce (KED) | 0.660 ppb             | 73,328 cps        |               |
| 141Pr (KED) | 0.080 ppb             | 9,000 cps         |               |
| 142Nd (KED) | 0.421 ppb             | 19,252 cps        |               |
| 152Sm (KED) | 0.057 ppb             | 2,267 cps         |               |
| 153Eu (KED) | 0.009 ppb             | 703 cps           |               |
| 158Gd (KED) | 0.049 ppb             | 2,644 cps         |               |
| 159Tb (KED) | 94.488 %              | 3,793,763 cps     |               |
| 164Dy (KED) | 0.034 ppb             | 2,027 cps         |               |
| 166Er (KED) | 0.015 ppb             | 1,373 cps         |               |
| 169Tm (KED) | 0.002 ppb             | 463 cps           |               |
| 174Yb (KED) | 0.014 ppb             | 1,157 cps         |               |
| 175Lu (KED) | -0.010 ppb            | 12,810 cps        |               |
| 205Tl (KED) | 0.005 ppb             | 750 cps           |               |
| 208Pb (KED) | 0.305 ppb             | 42,723 cps        |               |
| 209Bi (KED) | 90.105 %              | 3,079,657 cps     |               |
| 232Th (KED) | 0.210 ppb             | 48,729 cps        |               |
| 238U (KED)  | 0.014 ppb             | 3,667 cps         |               |

## Sample Summary

Instrument ID: iCAP Q

Analysis index: 41

Analysis name: 315047603860486jian

Analysis started at: 11/3/2021 4:26:43 PM

User name: WINDOWS-UPCI4ER\Administrator

| Category    | Concentration average | Concentration RSD |
|-------------|-----------------------|-------------------|
| 6Li (KED)   | 123.583 %             |                   |
| 9Be (KED)   | 0.019 ppb             |                   |
| 11B (KED)   | -10.868 ppb           |                   |
| 24Mg (KED)  | 296.943 ppb           |                   |
| 27Al (KED)  | 546.935 ppb           |                   |
| 45Sc (KED)  | 105.094 %             |                   |
| 51V (KED)   | 1.038 ppb             |                   |
| 52Cr (KED)  | 1.059 ppb             |                   |
| 55Mn (KED)  | 13.363 ppb            |                   |
| 56Fe (KED)  | 545.124 ppb           |                   |
| 58Ni (KED)  | 2.338 ppb             |                   |
| 59Co (KED)  | 0.258 ppb             |                   |
| 63Cu (KED)  | 2.752 ppb             |                   |
| 64Zn (KED)  | 62.134 ppb            |                   |
| 69Ga (KED)  | 1.836 ppb             |                   |
| 75As (KED)  | 0.366 ppb             |                   |
| 80Se (KED)  | 0.034 ppb             |                   |
| 85Rb (KED)  | 1.348 ppb             |                   |
| 88Sr (KED)  | 4.406 ppb             |                   |
| 89Y (KED)   | 95.990 %              |                   |
| 107Ag (KED) | 0.010 ppb             |                   |
| 114Cd (KED) | 0.033 ppb             |                   |
| 115In (KED) | 94.356 %              |                   |
| 133Cs (KED) | 0.106 ppb             |                   |
| 138Ba (KED) | 5.514 ppb             |                   |
| 139La (KED) | 0.492 ppb             |                   |
| 140Ce (KED) | 1.043 ppb             |                   |
| 141Pr (KED) | 0.127 ppb             |                   |
| 142Nd (KED) | 0.645 ppb             |                   |
| 152Sm (KED) | 0.096 ppb             |                   |
| 153Eu (KED) | 0.017 ppb             |                   |
| 158Gd (KED) | 0.083 ppb             |                   |
| 159Tb (KED) | 94.481 %              |                   |
| 164Dy (KED) | 0.059 ppb             |                   |
| 166Er (KED) | 0.029 ppb             |                   |
| 169Tm (KED) | 0.004 ppb             |                   |
| 174Yb (KED) | 0.025 ppb             |                   |
| 175Lu (KED) | 0.000 ppb             |                   |
| 205Tl (KED) | 0.008 ppb             |                   |
| 208Pb (KED) | 0.553 ppb             |                   |
| 209Bi (KED) | 92.652 %              |                   |
| 232Th (KED) | 0.152 ppb             |                   |
| 238U (KED)  | 0.025 ppb             |                   |

| Category   | Concentration average | Intensity average | Intensity RSD |
|------------|-----------------------|-------------------|---------------|
| 6Li (KED)  | 123.583 %             | 3,384 cps         |               |
| 9Be (KED)  | 0.019 ppb             | 3 cps             |               |
| 11B (KED)  | -10.868 ppb           | 1,163 cps         |               |
| 24Mg (KED) | 296.943 ppb           | 195,776 cps       |               |
| 27Al (KED) | 546.935 ppb           | 76,957 cps        |               |

| Category    | Concentration average | Intensity average | Intensity RSD |
|-------------|-----------------------|-------------------|---------------|
| 45Sc (KED)  | 105.094 %             | 52,925 cps        |               |
| 51V (KED)   | 1.038 ppb             | 9,674 cps         |               |
| 52Cr (KED)  | 1.059 ppb             | 15,550 cps        |               |
| 55Mn (KED)  | 13.363 ppb            | 95,803 cps        |               |
| 56Fe (KED)  | 545.124 ppb           | 7,113,464 cps     |               |
| 58Ni (KED)  | 2.338 ppb             | 39,439 cps        |               |
| 59Co (KED)  | 0.258 ppb             | 7,085 cps         |               |
| 63Cu (KED)  | 2.752 ppb             | 54,669 cps        |               |
| 64Zn (KED)  | 62.134 ppb            | 322,740 cps       |               |
| 69Ga (KED)  | 1.836 ppb             | 11,762 cps        |               |
| 75As (KED)  | 0.366 ppb             | 540 cps           |               |
| 80Se (KED)  | 0.034 ppb             | 1,387 cps         |               |
| 85Rb (KED)  | 1.348 ppb             | 7,619 cps         |               |
| 88Sr (KED)  | 4.406 ppb             | 34,882 cps        |               |
| 89Y (KED)   | 95.990 %              | 427,128 cps       |               |
| 107Ag (KED) | 0.010 ppb             | 543 cps           |               |
| 114Cd (KED) | 0.033 ppb             | 660 cps           |               |
| 115In (KED) | 94.356 %              | 757,254 cps       |               |
| 133Cs (KED) | 0.106 ppb             | 2,997 cps         |               |
| 138Ba (KED) | 5.514 ppb             | 211,579 cps       |               |
| 139La (KED) | 0.492 ppb             | 40,780 cps        |               |
| 140Ce (KED) | 1.043 ppb             | 115,112 cps       |               |
| 141Pr (KED) | 0.127 ppb             | 14,278 cps        |               |
| 142Nd (KED) | 0.645 ppb             | 29,348 cps        |               |
| 152Sm (KED) | 0.096 ppb             | 3,804 cps         |               |
| 153Eu (KED) | 0.017 ppb             | 1,363 cps         |               |
| 158Gd (KED) | 0.083 ppb             | 4,501 cps         |               |
| 159Tb (KED) | 94.481 %              | 3,793,499 cps     |               |
| 164Dy (KED) | 0.059 ppb             | 3,534 cps         |               |
| 166Er (KED) | 0.029 ppb             | 2,407 cps         |               |
| 169Tm (KED) | 0.004 ppb             | 873 cps           |               |
| 174Yb (KED) | 0.025 ppb             | 2,064 cps         |               |
| 175Lu (KED) | 0.000 ppb             | 14,292 cps        |               |
| 205Tl (KED) | 0.008 ppb             | 1,310 cps         |               |
| 208Pb (KED) | 0.553 ppb             | 72,313 cps        |               |
| 209Bi (KED) | 92.652 %              | 3,166,722 cps     |               |
| 232Th (KED) | 0.152 ppb             | 36,407 cps        |               |
| 238U (KED)  | 0.025 ppb             | 6,742 cps         |               |

## Sample Summary

Instrument ID: iCAP Q

Analysis index: 42

Analysis name: 315047603860499jian

Analysis started at: 11/3/2021 4:28:35 PM

User name: WINDOWS-UPCI4ER\Administrator

| Category    | Concentration average | Concentration RSD |
|-------------|-----------------------|-------------------|
| 6Li (KED)   | 102.882 %             |                   |
| 9Be (KED)   | 0.000 ppb             |                   |
| 11B (KED)   | -7.320 ppb            |                   |
| 24Mg (KED)  | 177.147 ppb           |                   |
| 27Al (KED)  | 282.412 ppb           |                   |
| 45Sc (KED)  | 100.713 %             |                   |
| 51V (KED)   | 0.508 ppb             |                   |
| 52Cr (KED)  | 0.676 ppb             |                   |
| 55Mn (KED)  | 6.713 ppb             |                   |
| 56Fe (KED)  | 276.366 ppb           |                   |
| 58Ni (KED)  | 1.335 ppb             |                   |
| 59Co (KED)  | 0.130 ppb             |                   |
| 63Cu (KED)  | 2.946 ppb             |                   |
| 64Zn (KED)  | 57.752 ppb            |                   |
| 69Ga (KED)  | 0.987 ppb             |                   |
| 75As (KED)  | 0.238 ppb             |                   |
| 80Se (KED)  | -0.221 ppb            |                   |
| 85Rb (KED)  | 0.829 ppb             |                   |
| 88Sr (KED)  | 2.840 ppb             |                   |
| 89Y (KED)   | 93.622 %              |                   |
| 107Ag (KED) | 0.010 ppb             |                   |
| 114Cd (KED) | 0.017 ppb             |                   |
| 115In (KED) | 92.957 %              |                   |
| 133Cs (KED) | 0.051 ppb             |                   |
| 138Ba (KED) | 2.983 ppb             |                   |
| 139La (KED) | 0.209 ppb             |                   |
| 140Ce (KED) | 0.426 ppb             |                   |
| 141Pr (KED) | 0.051 ppb             |                   |
| 142Nd (KED) | 0.269 ppb             |                   |
| 152Sm (KED) | 0.037 ppb             |                   |
| 153Eu (KED) | 0.008 ppb             |                   |
| 158Gd (KED) | 0.036 ppb             |                   |
| 159Tb (KED) | 97.525 %              |                   |
| 164Dy (KED) | 0.028 ppb             |                   |
| 166Er (KED) | 0.012 ppb             |                   |
| 169Tm (KED) | 0.002 ppb             |                   |
| 174Yb (KED) | 0.010 ppb             |                   |
| 175Lu (KED) | -0.010 ppb            |                   |
| 205Tl (KED) | 0.004 ppb             |                   |
| 208Pb (KED) | 0.332 ppb             |                   |
| 209Bi (KED) | 89.334 %              |                   |
| 232Th (KED) | 0.071 ppb             |                   |
| 238U (KED)  | 0.012 ppb             |                   |

| Category   | Concentration average | Intensity average | Intensity RSD |
|------------|-----------------------|-------------------|---------------|
| 6Li (KED)  | 102.882 %             | 2,817 cps         |               |
| 9Be (KED)  | 0.000 ppb             | 0 cps             |               |
| 11B (KED)  | -7.320 ppb            | 1,187 cps         |               |
| 24Mg (KED) | 177.147 ppb           | 97,348 cps        |               |
| 27Al (KED) | 282.412 ppb           | 38,232 cps        |               |

| Category    | Concentration average | Intensity average | Intensity RSD |
|-------------|-----------------------|-------------------|---------------|
| 45Sc (KED)  | 100.713 %             | 50,720 cps        |               |
| 51V (KED)   | 0.508 ppb             | 4,544 cps         |               |
| 52Cr (KED)  | 0.676 ppb             | 9,557 cps         |               |
| 55Mn (KED)  | 6.713 ppb             | 46,169 cps        |               |
| 56Fe (KED)  | 276.366 ppb           | 3,458,362 cps     |               |
| 58Ni (KED)  | 1.335 ppb             | 21,712 cps        |               |
| 59Co (KED)  | 0.130 ppb             | 3,450 cps         |               |
| 63Cu (KED)  | 2.946 ppb             | 57,003 cps        |               |
| 64Zn (KED)  | 57.752 ppb            | 293,362 cps       |               |
| 69Ga (KED)  | 0.987 ppb             | 6,238 cps         |               |
| 75As (KED)  | 0.238 ppb             | 347 cps           |               |
| 80Se (KED)  | -0.221 ppb            | 1,247 cps         |               |
| 85Rb (KED)  | 0.829 ppb             | 4,574 cps         |               |
| 88Sr (KED)  | 2.840 ppb             | 21,999 cps        |               |
| 89Y (KED)   | 93.622 %              | 416,591 cps       |               |
| 107Ag (KED) | 0.010 ppb             | 523 cps           |               |
| 114Cd (KED) | 0.017 ppb             | 347 cps           |               |
| 115In (KED) | 92.957 %              | 746,032 cps       |               |
| 133Cs (KED) | 0.051 ppb             | 1,437 cps         |               |
| 138Ba (KED) | 2.983 ppb             | 119,770 cps       |               |
| 139La (KED) | 0.209 ppb             | 17,970 cps        |               |
| 140Ce (KED) | 0.426 ppb             | 49,244 cps        |               |
| 141Pr (KED) | 0.051 ppb             | 5,965 cps         |               |
| 142Nd (KED) | 0.269 ppb             | 12,780 cps        |               |
| 152Sm (KED) | 0.037 ppb             | 1,537 cps         |               |
| 153Eu (KED) | 0.008 ppb             | 660 cps           |               |
| 158Gd (KED) | 0.036 ppb             | 1,997 cps         |               |
| 159Tb (KED) | 97.525 %              | 3,915,690 cps     |               |
| 164Dy (KED) | 0.028 ppb             | 1,713 cps         |               |
| 166Er (KED) | 0.012 ppb             | 1,210 cps         |               |
| 169Tm (KED) | 0.002 ppb             | 460 cps           |               |
| 174Yb (KED) | 0.010 ppb             | 917 cps           |               |
| 175Lu (KED) | -0.010 ppb            | 13,277 cps        |               |
| 205Tl (KED) | 0.004 ppb             | 740 cps           |               |
| 208Pb (KED) | 0.332 ppb             | 45,383 cps        |               |
| 209Bi (KED) | 89.334 %              | 3,053,305 cps     |               |
| 232Th (KED) | 0.071 ppb             | 16,448 cps        |               |
| 238U (KED)  | 0.012 ppb             | 3,274 cps         |               |

## Sample Summary

Instrument ID: iCAP Q

Analysis index: 43

Analysis name: 315047603860454jian

Analysis started at: 11/3/2021 4:30:27 PM

User name: WINDOWS-UPCI4ER\Administrator

| Category    | Concentration average | Concentration RSD |
|-------------|-----------------------|-------------------|
| 6Li (KED)   | 107.752 %             |                   |
| 9Be (KED)   | 0.022 ppb             |                   |
| 11B (KED)   | -13.626 ppb           |                   |
| 24Mg (KED)  | 198.571 ppb           |                   |
| 27Al (KED)  | 254.551 ppb           |                   |
| 45Sc (KED)  | 102.216 %             |                   |
| 51V (KED)   | 0.488 ppb             |                   |
| 52Cr (KED)  | 0.582 ppb             |                   |
| 55Mn (KED)  | 6.355 ppb             |                   |
| 56Fe (KED)  | 241.830 ppb           |                   |
| 58Ni (KED)  | 1.243 ppb             |                   |
| 59Co (KED)  | 0.112 ppb             |                   |
| 63Cu (KED)  | 2.171 ppb             |                   |
| 64Zn (KED)  | 58.639 ppb            |                   |
| 69Ga (KED)  | 1.173 ppb             |                   |
| 75As (KED)  | 0.323 ppb             |                   |
| 80Se (KED)  | -0.168 ppb            |                   |
| 85Rb (KED)  | 1.091 ppb             |                   |
| 88Sr (KED)  | 2.636 ppb             |                   |
| 89Y (KED)   | 96.442 %              |                   |
| 107Ag (KED) | 0.025 ppb             |                   |
| 114Cd (KED) | 0.016 ppb             |                   |
| 115In (KED) | 92.741 %              |                   |
| 133Cs (KED) | 0.047 ppb             |                   |
| 138Ba (KED) | 3.721 ppb             |                   |
| 139La (KED) | 0.198 ppb             |                   |
| 140Ce (KED) | 0.429 ppb             |                   |
| 141Pr (KED) | 0.048 ppb             |                   |
| 142Nd (KED) | 0.265 ppb             |                   |
| 152Sm (KED) | 0.038 ppb             |                   |
| 153Eu (KED) | 0.008 ppb             |                   |
| 158Gd (KED) | 0.033 ppb             |                   |
| 159Tb (KED) | 96.295 %              |                   |
| 164Dy (KED) | 0.026 ppb             |                   |
| 166Er (KED) | 0.011 ppb             |                   |
| 169Tm (KED) | 0.002 ppb             |                   |
| 174Yb (KED) | 0.011 ppb             |                   |
| 175Lu (KED) | -0.010 ppb            |                   |
| 205Tl (KED) | 0.004 ppb             |                   |
| 208Pb (KED) | 0.312 ppb             |                   |
| 209Bi (KED) | 92.779 %              |                   |
| 232Th (KED) | 0.065 ppb             |                   |
| 238U (KED)  | 0.012 ppb             |                   |

| Category   | Concentration average | Intensity average | Intensity RSD |
|------------|-----------------------|-------------------|---------------|
| 6Li (KED)  | 107.752 %             | 2,950 cps         |               |
| 9Be (KED)  | 0.022 ppb             | 3 cps             |               |
| 11B (KED)  | -13.626 ppb           | 837 cps           |               |
| 24Mg (KED) | 198.571 ppb           | 114,250 cps       |               |
| 27Al (KED) | 254.551 ppb           | 35,006 cps        |               |

| Category    | Concentration average | Intensity average | Intensity RSD |
|-------------|-----------------------|-------------------|---------------|
| 45Sc (KED)  | 102.216 %             | 51,476 cps        |               |
| 51V (KED)   | 0.488 ppb             | 4,427 cps         |               |
| 52Cr (KED)  | 0.582 ppb             | 8,359 cps         |               |
| 55Mn (KED)  | 6.355 ppb             | 44,362 cps        |               |
| 56Fe (KED)  | 241.830 ppb           | 3,071,919 cps     |               |
| 58Ni (KED)  | 1.243 ppb             | 20,547 cps        |               |
| 59Co (KED)  | 0.112 ppb             | 3,017 cps         |               |
| 63Cu (KED)  | 2.171 ppb             | 43,529 cps        |               |
| 64Zn (KED)  | 58.639 ppb            | 306,668 cps       |               |
| 69Ga (KED)  | 1.173 ppb             | 7,609 cps         |               |
| 75As (KED)  | 0.323 ppb             | 480 cps           |               |
| 80Se (KED)  | -0.168 ppb            | 1,307 cps         |               |
| 85Rb (KED)  | 1.091 ppb             | 6,198 cps         |               |
| 88Sr (KED)  | 2.636 ppb             | 21,051 cps        |               |
| 89Y (KED)   | 96.442 %              | 429,142 cps       |               |
| 107Ag (KED) | 0.025 ppb             | 1,270 cps         |               |
| 114Cd (KED) | 0.016 ppb             | 333 cps           |               |
| 115In (KED) | 92.741 %              | 744,294 cps       |               |
| 133Cs (KED) | 0.047 ppb             | 1,323 cps         |               |
| 138Ba (KED) | 3.721 ppb             | 146,646 cps       |               |
| 139La (KED) | 0.198 ppb             | 16,805 cps        |               |
| 140Ce (KED) | 0.429 ppb             | 48,999 cps        |               |
| 141Pr (KED) | 0.048 ppb             | 5,521 cps         |               |
| 142Nd (KED) | 0.265 ppb             | 12,433 cps        |               |
| 152Sm (KED) | 0.038 ppb             | 1,540 cps         |               |
| 153Eu (KED) | 0.008 ppb             | 630 cps           |               |
| 158Gd (KED) | 0.033 ppb             | 1,853 cps         |               |
| 159Tb (KED) | 96.295 %              | 3,866,332 cps     |               |
| 164Dy (KED) | 0.026 ppb             | 1,577 cps         |               |
| 166Er (KED) | 0.011 ppb             | 1,103 cps         |               |
| 169Tm (KED) | 0.002 ppb             | 460 cps           |               |
| 174Yb (KED) | 0.011 ppb             | 993 cps           |               |
| 175Lu (KED) | -0.010 ppb            | 13,150 cps        |               |
| 205Tl (KED) | 0.004 ppb             | 677 cps           |               |
| 208Pb (KED) | 0.312 ppb             | 44,858 cps        |               |
| 209Bi (KED) | 92.779 %              | 3,171,064 cps     |               |
| 232Th (KED) | 0.065 ppb             | 15,610 cps        |               |
| 238U (KED)  | 0.012 ppb             | 3,274 cps         |               |

## Sample Summary

Instrument ID: iCAP Q

Analysis index: 44

Analysis name: 315042603860490jian

Analysis started at: 11/3/2021 4:32:30 PM

User name: WINDOWS-UPCI4ER\Administrator

| Category    | Concentration average | Concentration RSD |
|-------------|-----------------------|-------------------|
| 6Li (KED)   | 107.022 %             |                   |
| 9Be (KED)   | 0.000 ppb             |                   |
| 11B (KED)   | -8.119 ppb            |                   |
| 24Mg (KED)  | 150.277 ppb           |                   |
| 27Al (KED)  | 245.776 ppb           |                   |
| 45Sc (KED)  | 97.909 %              |                   |
| 51V (KED)   | 0.489 ppb             |                   |
| 52Cr (KED)  | 0.770 ppb             |                   |
| 55Mn (KED)  | 6.228 ppb             |                   |
| 56Fe (KED)  | 230.946 ppb           |                   |
| 58Ni (KED)  | 1.391 ppb             |                   |
| 59Co (KED)  | 0.113 ppb             |                   |
| 63Cu (KED)  | 2.975 ppb             |                   |
| 64Zn (KED)  | 65.938 ppb            |                   |
| 69Ga (KED)  | 1.081 ppb             |                   |
| 75As (KED)  | 0.266 ppb             |                   |
| 80Se (KED)  | 0.179 ppb             |                   |
| 85Rb (KED)  | 0.729 ppb             |                   |
| 88Sr (KED)  | 2.483 ppb             |                   |
| 89Y (KED)   | 91.432 %              |                   |
| 107Ag (KED) | 0.035 ppb             |                   |
| 114Cd (KED) | 0.017 ppb             |                   |
| 115In (KED) | 89.671 %              |                   |
| 133Cs (KED) | 0.043 ppb             |                   |
| 138Ba (KED) | 3.285 ppb             |                   |
| 139La (KED) | 0.208 ppb             |                   |
| 140Ce (KED) | 0.478 ppb             |                   |
| 141Pr (KED) | 0.050 ppb             |                   |
| 142Nd (KED) | 0.284 ppb             |                   |
| 152Sm (KED) | 0.039 ppb             |                   |
| 153Eu (KED) | 0.008 ppb             |                   |
| 158Gd (KED) | 0.033 ppb             |                   |
| 159Tb (KED) | 92.288 %              |                   |
| 164Dy (KED) | 0.026 ppb             |                   |
| 166Er (KED) | 0.012 ppb             |                   |
| 169Tm (KED) | 0.002 ppb             |                   |
| 174Yb (KED) | 0.010 ppb             |                   |
| 175Lu (KED) | -0.010 ppb            |                   |
| 205Tl (KED) | 0.004 ppb             |                   |
| 208Pb (KED) | 0.340 ppb             |                   |
| 209Bi (KED) | 89.480 %              |                   |
| 232Th (KED) | 0.061 ppb             |                   |
| 238U (KED)  | 0.013 ppb             |                   |

| Category   | Concentration average | Intensity average | Intensity RSD |
|------------|-----------------------|-------------------|---------------|
| 6Li (KED)  | 107.022 %             | 2,930 cps         |               |
| 9Be (KED)  | 0.000 ppb             | 0 cps             |               |
| 11B (KED)  | -8.119 ppb            | 1,183 cps         |               |
| 24Mg (KED) | 150.277 ppb           | 85,951 cps        |               |
| 27Al (KED) | 245.776 ppb           | 32,385 cps        |               |

| Category    | Concentration average | Intensity average | Intensity RSD |
|-------------|-----------------------|-------------------|---------------|
| 45Sc (KED)  | 97.909 %              | 49,307 cps        |               |
| 51V (KED)   | 0.489 ppb             | 4,247 cps         |               |
| 52Cr (KED)  | 0.770 ppb             | 10,571 cps        |               |
| 55Mn (KED)  | 6.228 ppb             | 41,646 cps        |               |
| 56Fe (KED)  | 230.946 ppb           | 2,810,249 cps     |               |
| 58Ni (KED)  | 1.391 ppb             | 21,989 cps        |               |
| 59Co (KED)  | 0.113 ppb             | 2,907 cps         |               |
| 63Cu (KED)  | 2.975 ppb             | 56,210 cps        |               |
| 64Zn (KED)  | 65.938 ppb            | 325,576 cps       |               |
| 69Ga (KED)  | 1.081 ppb             | 6,662 cps         |               |
| 75As (KED)  | 0.266 ppb             | 377 cps           |               |
| 80Se (KED)  | 0.179 ppb             | 1,380 cps         |               |
| 85Rb (KED)  | 0.729 ppb             | 3,931 cps         |               |
| 88Sr (KED)  | 2.483 ppb             | 18,804 cps        |               |
| 89Y (KED)   | 91.432 %              | 406,848 cps       |               |
| 107Ag (KED) | 0.035 ppb             | 1,733 cps         |               |
| 114Cd (KED) | 0.017 ppb             | 337 cps           |               |
| 115In (KED) | 89.671 %              | 719,656 cps       |               |
| 133Cs (KED) | 0.043 ppb             | 1,163 cps         |               |
| 138Ba (KED) | 3.285 ppb             | 124,475 cps       |               |
| 139La (KED) | 0.208 ppb             | 16,881 cps        |               |
| 140Ce (KED) | 0.478 ppb             | 52,132 cps        |               |
| 141Pr (KED) | 0.050 ppb             | 5,521 cps         |               |
| 142Nd (KED) | 0.284 ppb             | 12,740 cps        |               |
| 152Sm (KED) | 0.039 ppb             | 1,513 cps         |               |
| 153Eu (KED) | 0.008 ppb             | 603 cps           |               |
| 158Gd (KED) | 0.033 ppb             | 1,743 cps         |               |
| 159Tb (KED) | 92.288 %              | 3,705,418 cps     |               |
| 164Dy (KED) | 0.026 ppb             | 1,513 cps         |               |
| 166Er (KED) | 0.012 ppb             | 1,183 cps         |               |
| 169Tm (KED) | 0.002 ppb             | 357 cps           |               |
| 174Yb (KED) | 0.010 ppb             | 797 cps           |               |
| 175Lu (KED) | -0.010 ppb            | 12,570 cps        |               |
| 205Tl (KED) | 0.004 ppb             | 693 cps           |               |
| 208Pb (KED) | 0.340 ppb             | 46,293 cps        |               |
| 209Bi (KED) | 89.480 %              | 3,058,294 cps     |               |
| 232Th (KED) | 0.061 ppb             | 14,121 cps        |               |
| 238U (KED)  | 0.013 ppb             | 3,384 cps         |               |

## Sample Summary

Instrument ID: iCAP Q

Analysis index: 45

Analysis name: 315047603860476jian

Analysis started at: 11/3/2021 4:34:22 PM

User name: WINDOWS-UPCI4ER\Administrator

| Category    | Concentration average | Concentration RSD |
|-------------|-----------------------|-------------------|
| 6Li (KED)   | 112.745 %             |                   |
| 9Be (KED)   | 0.021 ppb             |                   |
| 11B (KED)   | -18.950 ppb           |                   |
| 24Mg (KED)  | 136.943 ppb           |                   |
| 27Al (KED)  | 253.862 ppb           |                   |
| 45Sc (KED)  | 104.262 %             |                   |
| 51V (KED)   | 0.476 ppb             |                   |
| 52Cr (KED)  | 1.079 ppb             |                   |
| 55Mn (KED)  | 5.358 ppb             |                   |
| 56Fe (KED)  | 222.475 ppb           |                   |
| 58Ni (KED)  | 1.284 ppb             |                   |
| 59Co (KED)  | 0.108 ppb             |                   |
| 63Cu (KED)  | 2.059 ppb             |                   |
| 64Zn (KED)  | 57.286 ppb            |                   |
| 69Ga (KED)  | 0.964 ppb             |                   |
| 75As (KED)  | 0.312 ppb             |                   |
| 80Se (KED)  | -0.186 ppb            |                   |
| 85Rb (KED)  | 0.903 ppb             |                   |
| 88Sr (KED)  | 2.192 ppb             |                   |
| 89Y (KED)   | 97.752 %              |                   |
| 107Ag (KED) | 0.009 ppb             |                   |
| 114Cd (KED) | 0.010 ppb             |                   |
| 115In (KED) | 93.632 %              |                   |
| 133Cs (KED) | 0.044 ppb             |                   |
| 138Ba (KED) | 3.039 ppb             |                   |
| 139La (KED) | 0.214 ppb             |                   |
| 140Ce (KED) | 0.459 ppb             |                   |
| 141Pr (KED) | 0.051 ppb             |                   |
| 142Nd (KED) | 0.277 ppb             |                   |
| 152Sm (KED) | 0.042 ppb             |                   |
| 153Eu (KED) | 0.007 ppb             |                   |
| 158Gd (KED) | 0.035 ppb             |                   |
| 159Tb (KED) | 93.851 %              |                   |
| 164Dy (KED) | 0.025 ppb             |                   |
| 166Er (KED) | 0.013 ppb             |                   |
| 169Tm (KED) | 0.002 ppb             |                   |
| 174Yb (KED) | 0.009 ppb             |                   |
| 175Lu (KED) | -0.010 ppb            |                   |
| 205Tl (KED) | 0.004 ppb             |                   |
| 208Pb (KED) | 0.284 ppb             |                   |
| 209Bi (KED) | 92.577 %              |                   |
| 232Th (KED) | 0.075 ppb             |                   |
| 238U (KED)  | 0.013 ppb             |                   |

| Category   | Concentration average | Intensity average | Intensity RSD |
|------------|-----------------------|-------------------|---------------|
| 6Li (KED)  | 112.745 %             | 3,087 cps         |               |
| 9Be (KED)  | 0.021 ppb             | 3 cps             |               |
| 11B (KED)  | -18.950 ppb           | 517 cps           |               |
| 24Mg (KED) | 136.943 ppb           | 82,542 cps        |               |
| 27Al (KED) | 253.862 ppb           | 35,611 cps        |               |

| Category    | Concentration average | Intensity average | Intensity RSD |
|-------------|-----------------------|-------------------|---------------|
| 45Sc (KED)  | 104.262 %             | 52,507 cps        |               |
| 51V (KED)   | 0.476 ppb             | 4,404 cps         |               |
| 52Cr (KED)  | 1.079 ppb             | 15,723 cps        |               |
| 55Mn (KED)  | 5.358 ppb             | 38,168 cps        |               |
| 56Fe (KED)  | 222.475 ppb           | 2,883,019 cps     |               |
| 58Ni (KED)  | 1.284 ppb             | 21,635 cps        |               |
| 59Co (KED)  | 0.108 ppb             | 2,967 cps         |               |
| 63Cu (KED)  | 2.059 ppb             | 41,884 cps        |               |
| 64Zn (KED)  | 57.286 ppb            | 303,927 cps       |               |
| 69Ga (KED)  | 0.964 ppb             | 6,368 cps         |               |
| 75As (KED)  | 0.312 ppb             | 470 cps           |               |
| 80Se (KED)  | -0.186 ppb            | 1,317 cps         |               |
| 85Rb (KED)  | 0.903 ppb             | 5,201 cps         |               |
| 88Sr (KED)  | 2.192 ppb             | 17,779 cps        |               |
| 89Y (KED)   | 97.752 %              | 434,970 cps       |               |
| 107Ag (KED) | 0.009 ppb             | 493 cps           |               |
| 114Cd (KED) | 0.010 ppb             | 233 cps           |               |
| 115In (KED) | 93.632 %              | 751,449 cps       |               |
| 133Cs (KED) | 0.044 ppb             | 1,260 cps         |               |
| 138Ba (KED) | 3.039 ppb             | 117,348 cps       |               |
| 139La (KED) | 0.214 ppb             | 17,689 cps        |               |
| 140Ce (KED) | 0.459 ppb             | 50,944 cps        |               |
| 141Pr (KED) | 0.051 ppb             | 5,698 cps         |               |
| 142Nd (KED) | 0.277 ppb             | 12,656 cps        |               |
| 152Sm (KED) | 0.042 ppb             | 1,660 cps         |               |
| 153Eu (KED) | 0.007 ppb             | 577 cps           |               |
| 158Gd (KED) | 0.035 ppb             | 1,893 cps         |               |
| 159Tb (KED) | 93.851 %              | 3,768,174 cps     |               |
| 164Dy (KED) | 0.025 ppb             | 1,483 cps         |               |
| 166Er (KED) | 0.013 ppb             | 1,243 cps         |               |
| 169Tm (KED) | 0.002 ppb             | 440 cps           |               |
| 174Yb (KED) | 0.009 ppb             | 803 cps           |               |
| 175Lu (KED) | -0.010 ppb            | 12,827 cps        |               |
| 205Tl (KED) | 0.004 ppb             | 690 cps           |               |
| 208Pb (KED) | 0.284 ppb             | 41,549 cps        |               |
| 209Bi (KED) | 92.577 %              | 3,164,163 cps     |               |
| 232Th (KED) | 0.075 ppb             | 18,110 cps        |               |
| 238U (KED)  | 0.013 ppb             | 3,554 cps         |               |

## Sample Summary

Instrument ID: iCAP Q

Analysis index: 46

Analysis name: 315047603860514jian

Analysis started at: 11/3/2021 4:36:18 PM

User name: WINDOWS-UPCI4ER\Administrator

| Category    | Concentration average | Concentration RSD |
|-------------|-----------------------|-------------------|
| 6Li (KED)   | 107.752 %             |                   |
| 9Be (KED)   | 0.000 ppb             |                   |
| 11B (KED)   | -21.648 ppb           |                   |
| 24Mg (KED)  | 156.725 ppb           |                   |
| 27Al (KED)  | 271.800 ppb           |                   |
| 45Sc (KED)  | 100.953 %             |                   |
| 51V (KED)   | 0.501 ppb             |                   |
| 52Cr (KED)  | 0.694 ppb             |                   |
| 55Mn (KED)  | 5.923 ppb             |                   |
| 56Fe (KED)  | 252.015 ppb           |                   |
| 58Ni (KED)  | 1.552 ppb             |                   |
| 59Co (KED)  | 0.133 ppb             |                   |
| 63Cu (KED)  | 2.790 ppb             |                   |
| 64Zn (KED)  | 58.046 ppb            |                   |
| 69Ga (KED)  | 0.973 ppb             |                   |
| 75As (KED)  | 0.293 ppb             |                   |
| 80Se (KED)  | 0.002 ppb             |                   |
| 85Rb (KED)  | 0.823 ppb             |                   |
| 88Sr (KED)  | 2.382 ppb             |                   |
| 89Y (KED)   | 94.831 %              |                   |
| 107Ag (KED) | 0.012 ppb             |                   |
| 114Cd (KED) | 0.009 ppb             |                   |
| 115In (KED) | 90.500 %              |                   |
| 133Cs (KED) | 0.052 ppb             |                   |
| 138Ba (KED) | 2.890 ppb             |                   |
| 139La (KED) | 0.228 ppb             |                   |
| 140Ce (KED) | 0.460 ppb             |                   |
| 141Pr (KED) | 0.053 ppb             |                   |
| 142Nd (KED) | 0.283 ppb             |                   |
| 152Sm (KED) | 0.043 ppb             |                   |
| 153Eu (KED) | 0.007 ppb             |                   |
| 158Gd (KED) | 0.035 ppb             |                   |
| 159Tb (KED) | 95.042 %              |                   |
| 164Dy (KED) | 0.024 ppb             |                   |
| 166Er (KED) | 0.011 ppb             |                   |
| 169Tm (KED) | 0.002 ppb             |                   |
| 174Yb (KED) | 0.012 ppb             |                   |
| 175Lu (KED) | -0.009 ppb            |                   |
| 205Tl (KED) | 0.004 ppb             |                   |
| 208Pb (KED) | 0.270 ppb             |                   |
| 209Bi (KED) | 90.312 %              |                   |
| 232Th (KED) | 0.072 ppb             |                   |
| 238U (KED)  | 0.012 ppb             |                   |

| Category   | Concentration average | Intensity average | Intensity RSD |
|------------|-----------------------|-------------------|---------------|
| 6Li (KED)  | 107.752 %             | 2,950 cps         |               |
| 9Be (KED)  | 0.000 ppb             | 0 cps             |               |
| 11B (KED)  | -21.648 ppb           | 320 cps           |               |
| 24Mg (KED) | 156.725 ppb           | 90,238 cps        |               |
| 27Al (KED) | 271.800 ppb           | 36,895 cps        |               |

| Category    | Concentration average | Intensity average | Intensity RSD |
|-------------|-----------------------|-------------------|---------------|
| 45Sc (KED)  | 100.953 %             | 50,840 cps        |               |
| 51V (KED)   | 0.501 ppb             | 4,487 cps         |               |
| 52Cr (KED)  | 0.694 ppb             | 9,824 cps         |               |
| 55Mn (KED)  | 5.923 ppb             | 40,840 cps        |               |
| 56Fe (KED)  | 252.015 ppb           | 3,161,533 cps     |               |
| 58Ni (KED)  | 1.552 ppb             | 25,246 cps        |               |
| 59Co (KED)  | 0.133 ppb             | 3,520 cps         |               |
| 63Cu (KED)  | 2.790 ppb             | 54,733 cps        |               |
| 64Zn (KED)  | 58.046 ppb            | 298,607 cps       |               |
| 69Ga (KED)  | 0.973 ppb             | 6,235 cps         |               |
| 75As (KED)  | 0.293 ppb             | 430 cps           |               |
| 80Se (KED)  | 0.002 ppb             | 1,357 cps         |               |
| 85Rb (KED)  | 0.823 ppb             | 4,601 cps         |               |
| 88Sr (KED)  | 2.382 ppb             | 18,721 cps        |               |
| 89Y (KED)   | 94.831 %              | 421,971 cps       |               |
| 107Ag (KED) | 0.012 ppb             | 607 cps           |               |
| 114Cd (KED) | 0.009 ppb             | 207 cps           |               |
| 115In (KED) | 90.500 %              | 726,313 cps       |               |
| 133Cs (KED) | 0.052 ppb             | 1,423 cps         |               |
| 138Ba (KED) | 2.890 ppb             | 113,156 cps       |               |
| 139La (KED) | 0.228 ppb             | 19,031 cps        |               |
| 140Ce (KED) | 0.460 ppb             | 51,774 cps        |               |
| 141Pr (KED) | 0.053 ppb             | 6,011 cps         |               |
| 142Nd (KED) | 0.283 ppb             | 13,097 cps        |               |
| 152Sm (KED) | 0.043 ppb             | 1,723 cps         |               |
| 153Eu (KED) | 0.007 ppb             | 540 cps           |               |
| 158Gd (KED) | 0.035 ppb             | 1,907 cps         |               |
| 159Tb (KED) | 95.042 %              | 3,816,008 cps     |               |
| 164Dy (KED) | 0.024 ppb             | 1,480 cps         |               |
| 166Er (KED) | 0.011 ppb             | 1,150 cps         |               |
| 169Tm (KED) | 0.002 ppb             | 437 cps           |               |
| 174Yb (KED) | 0.012 ppb             | 983 cps           |               |
| 175Lu (KED) | -0.009 ppb            | 13,090 cps        |               |
| 205Tl (KED) | 0.004 ppb             | 730 cps           |               |
| 208Pb (KED) | 0.270 ppb             | 38,934 cps        |               |
| 209Bi (KED) | 90.312 %              | 3,086,747 cps     |               |
| 232Th (KED) | 0.072 ppb             | 16,888 cps        |               |
| 238U (KED)  | 0.012 ppb             | 3,134 cps         |               |
