# Supplementary material for: Geographic and breed-specific traceability of cashmere via mineral element profiling in Inner Mongolia (Ordos, Chifeng, and Alxa League)
Source: Royal Society of Chemistry journal article supplement (doi:10.1039/d5ra08122j), 2026-01-01
Supplement: d5ra08122j1.zip [file 20211104- wen niu te qi (1-20)+ wen niu te qi (1-4) + a zuo qi nuo ri gong su(5-22).pdf › ԭʼ޿/20211104- wen niu te qi (1-20)+ wen niu te qi (1-4) + a zuo qi nuo ri gong su(5-22).pdf]

## Instrument Summary:

Instrument ID: iCAP Q  
Serial Number: Undefined

## Labbook Summary:

Path and filename: \_Application Data\Workspace\LabBooks\wlw\20211104-1.imexp  
Labbook created by: Administrator  
Based on template:  
Hardware configuration: iCAPQ1  
Labbook type: eQuant  
Qtegra version (last saved): 2.7.2425.154  
Labbook started: 11/4/2021 2:45:44 PM  
Labbook finished: 11/4/2021 4:55:52 PM

## Method Summary:

| Isotope     | Mode | Dwell time (s) | # of Channels | Spacing | Resolution | IS          |
|-------------|------|----------------|---------------|---------|------------|-------------|
| 6Li (KED)   | KED  | 0.03           | 3             | 0.1     | Normal     |             |
| 9Be (KED)   | KED  | 0.03           | 3             | 0.1     | Normal     | 6Li (KED)   |
| 11B (KED)   | KED  | 0.03           | 3             | 0.1     | Normal     | 6Li (KED)   |
| 24Mg (KED)  | KED  | 0.03           | 3             | 0.1     | Normal     | 6Li (KED)   |
| 27Al (KED)  | KED  | 0.03           | 3             | 0.1     | Normal     | 45Sc (KED)  |
| 45Sc (KED)  | KED  | 0.03           | 3             | 0.1     | Normal     |             |
| 51V (KED)   | KED  | 0.03           | 3             | 0.1     | Normal     | 45Sc (KED)  |
| 52Cr (KED)  | KED  | 0.03           | 3             | 0.1     | Normal     | 45Sc (KED)  |
| 55Mn (KED)  | KED  | 0.03           | 3             | 0.1     | Normal     | 45Sc (KED)  |
| 56Fe (KED)  | KED  | 0.03           | 3             | 0.1     | Normal     | 45Sc (KED)  |
| 58Ni (KED)  | KED  | 0.03           | 3             | 0.1     | Normal     | 45Sc (KED)  |
| 59Co (KED)  | KED  | 0.03           | 3             | 0.1     | Normal     | 45Sc (KED)  |
| 63Cu (KED)  | KED  | 0.03           | 3             | 0.1     | Normal     | 89Y (KED)   |
| 64Zn (KED)  | KED  | 0.03           | 3             | 0.1     | Normal     | 89Y (KED)   |
| 69Ga (KED)  | KED  | 0.03           | 3             | 0.1     | Normal     | 89Y (KED)   |
| 75As (KED)  | KED  | 0.03           | 3             | 0.1     | Normal     | 89Y (KED)   |
| 80Se (KED)  | KED  | 0.03           | 3             | 0.1     | Normal     | 89Y (KED)   |
| 85Rb (KED)  | KED  | 0.03           | 3             | 0.1     | Normal     | 89Y (KED)   |
| 88Sr (KED)  | KED  | 0.03           | 3             | 0.1     | Normal     | 89Y (KED)   |
| 89Y (KED)   | KED  | 0.03           | 3             | 0.1     | Normal     |             |
| 107Ag (KED) | KED  | 0.03           | 3             | 0.1     | Normal     | 115In (KED) |
| 114Cd (KED) | KED  | 0.03           | 3             | 0.1     | Normal     | 115In (KED) |
| 115In (KED) | KED  | 0.03           | 3             | 0.1     | Normal     |             |
| 133Cs (KED) | KED  | 0.03           | 3             | 0.1     | Normal     | 115In (KED) |
| 138Ba (KED) | KED  | 0.03           | 3             | 0.1     | Normal     | 159Tb (KED) |
| 139La (KED) | KED  | 0.03           | 3             | 0.1     | Normal     | 159Tb (KED) |
| 140Ce (KED) | KED  | 0.03           | 3             | 0.1     | Normal     | 159Tb (KED) |
| 141Pr (KED) | KED  | 0.03           | 3             | 0.1     | Normal     | 159Tb (KED) |
| 142Nd (KED) | KED  | 0.03           | 3             | 0.1     | Normal     | 159Tb (KED) |
| 152Sm (KED) | KED  | 0.03           | 3             | 0.1     | Normal     | 159Tb (KED) |
| 153Eu (KED) | KED  | 0.03           | 3             | 0.1     | Normal     | 159Tb (KED) |
| 158Gd (KED) | KED  | 0.03           | 3             | 0.1     | Normal     | 159Tb (KED) |
| 159Tb (KED) | KED  | 0.03           | 3             | 0.1     | Normal     |             |
| 164Dy (KED) | KED  | 0.03           | 3             | 0.1     | Normal     | 159Tb (KED) |
| 166Er (KED) | KED  | 0.03           | 3             | 0.1     | Normal     | 159Tb (KED) |
| 169Tm (KED) | KED  | 0.03           | 3             | 0.1     | Normal     | 159Tb (KED) |
| 174Yb (KED) | KED  | 0.03           | 3             | 0.1     | Normal     | 159Tb (KED) |
| 175Lu (KED) | KED  | 0.03           | 3             | 0.1     | Normal     | 159Tb (KED) |
| 205Tl (KED) | KED  | 0.03           | 3             | 0.1     | Normal     | 209Bi (KED) |
| 208Pb (KED) | KED  | 0.03           | 3             | 0.1     | Normal     | 209Bi (KED) |
| 209Bi (KED) | KED  | 0.03           | 3             | 0.1     | Normal     |             |
| 232Th (KED) | KED  | 0.03           | 3             | 0.1     | Normal     | 209Bi (KED) |
| 238U (KED)  | KED  | 0.03           | 3             | 0.1     | Normal     | 209Bi (KED) |

| Isotope     | Mode | Dwell time (s) | # of Channels | Spacing | Resolution |
|-------------|------|----------------|---------------|---------|------------|
| 6Li (KED)   | KED  | 0.03           | 3             | 0.1     | Normal     |
| 45Sc (KED)  | KED  | 0.03           | 3             | 0.1     | Normal     |
| 89Y (KED)   | KED  | 0.03           | 3             | 0.1     | Normal     |
| 115In (KED) | KED  | 0.03           | 3             | 0.1     | Normal     |
| 159Tb (KED) | KED  | 0.03           | 3             | 0.1     | Normal     |
| 209Bi (KED) | KED  | 0.03           | 3             | 0.1     | Normal     |

| No. of sweeps | Time per sweep[s] | Time per main run[s] |
|---------------|-------------------|----------------------|
| 10            | 3.87              | 38.7                 |

## Calibration Curves:

9Be (KED)

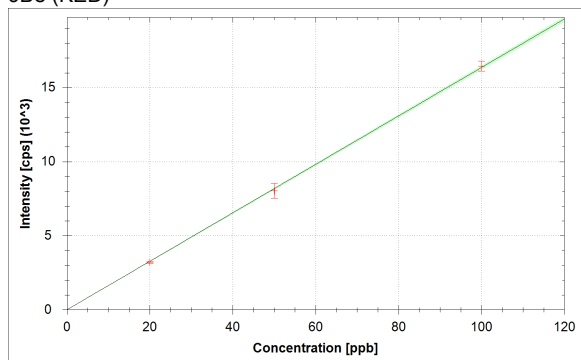

$$f(x) = 163.5390 \cdot x + 1.1153$$

$$R^2 = 0.9998$$

$$\text{BEC} = 0.007 \text{ ppb}$$

$$\text{LoD} = 0.0000 \text{ ppb}$$

11B (KED)

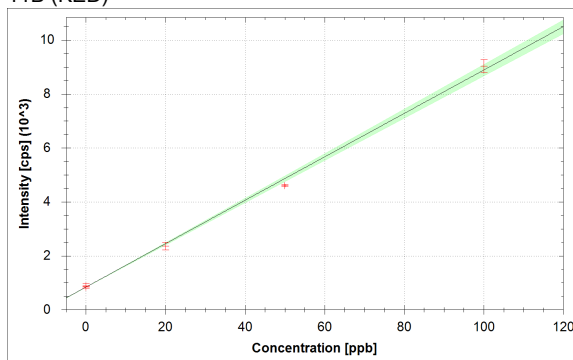

$$f(x) = 80.4923 \cdot x + 838.4378$$

$$R^2 = 0.9979$$

$$\text{BEC} = 10.416 \text{ ppb}$$

$$\text{LoD} = 3.1990 \text{ ppb}$$

24Mg (KED)

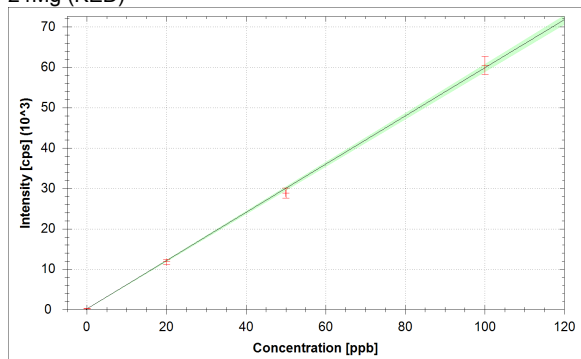

$$f(x) = 596.5308 \cdot x + 195.4412$$

$$R^2 = 0.9993$$

$$\text{BEC} = 0.328 \text{ ppb}$$

$$\text{LoD} = 0.1028 \text{ ppb}$$

27Al (KED)

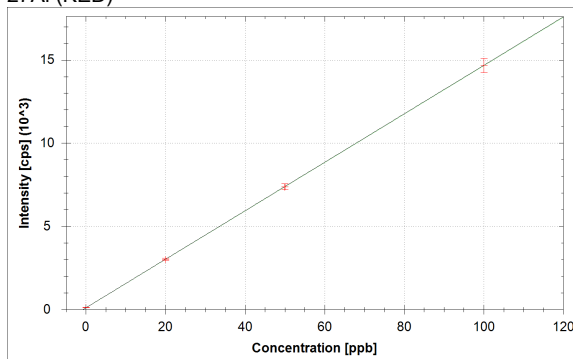

$$f(x) = 145.6295 \cdot x + 107.5451$$

$$R^2 = 1.0000$$

$$\text{BEC} = 0.738 \text{ ppb}$$

$$\text{LoD} = 0.0825 \text{ ppb}$$

51V (KED)

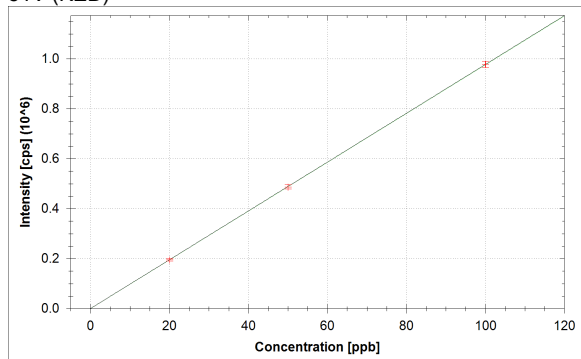

$$f(x) = 9771.5343 \cdot x + 4.4384$$

$$R^2 = 1.0000$$

$$\text{BEC} = 0.000 \text{ ppb}$$

$$\text{LoD} = 0.0006 \text{ ppb}$$

52Cr (KED)

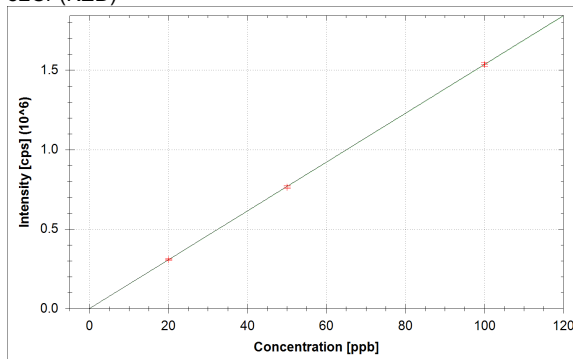

$$f(x) = 15354.5275 \cdot x + 91.9517$$

$$R^2 = 1.0000$$

$$\text{BEC} = 0.006 \text{ ppb}$$

$$\text{LoD} = 0.0032 \text{ ppb}$$

55Mn (KED)

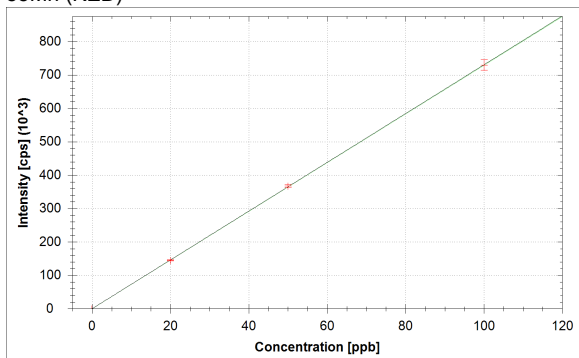

$$f(x) = 7300.4943 \cdot x + 66.5430$$

$$R^2 = 1.0000$$

$$\text{BEC} = 0.009 \text{ ppb}$$

$$\text{LoD} = 0.0041 \text{ ppb}$$

56Fe (KED)

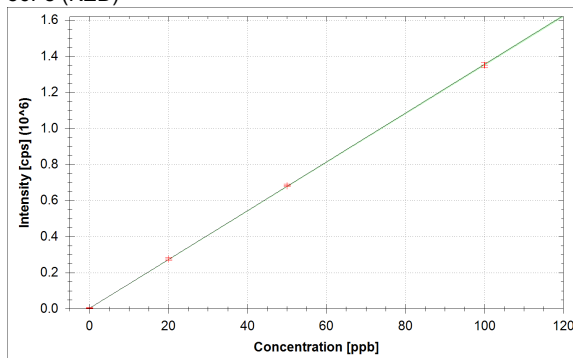

$$f(x) = 13518.1282 \cdot x + 2204.3743$$

$$R^2 = 1.0000$$

$$\text{BEC} = 0.163 \text{ ppb}$$

$$\text{LoD} = 0.5680 \text{ ppb}$$

58Ni (KED)

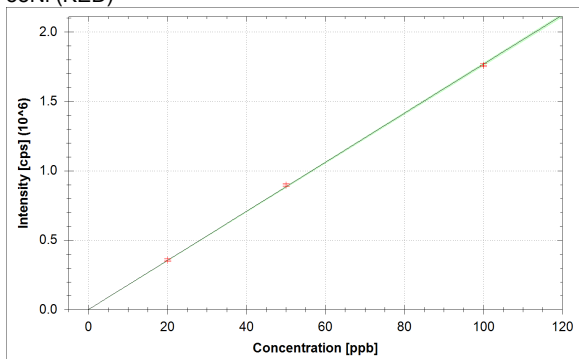

$$f(x) = 17671.8735 \cdot x + 353.7585$$

$$R^2 = 0.9999$$

$$\text{BEC} = 0.020 \text{ ppb}$$

$$\text{LoD} = 0.0087 \text{ ppb}$$

59Co (KED)

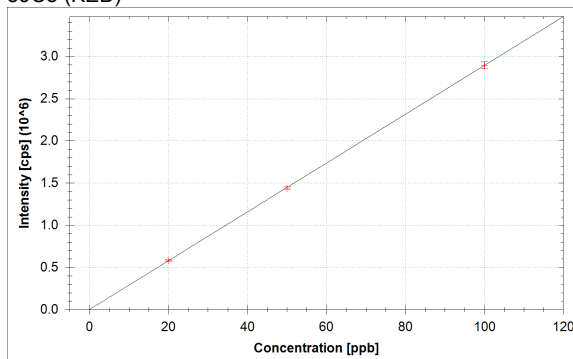

$$f(x) = 28937.5647 \cdot x + 28.8405$$

$$R^2 = 1.0000$$

$$\text{BEC} = 0.001 \text{ ppb}$$

$$\text{LoD} = 0.0014 \text{ ppb}$$

63Cu (KED)

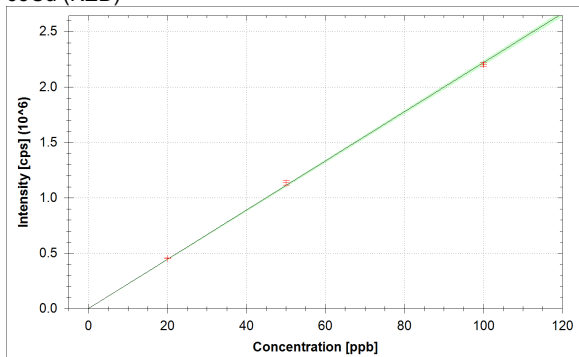

$$f(x) = 22191.1111 \cdot x + 548.1896$$

$$R^2 = 0.9997$$

$$\text{BEC} = 0.025 \text{ ppb}$$

$$\text{LoD} = 0.0009 \text{ ppb}$$

64Zn (KED)

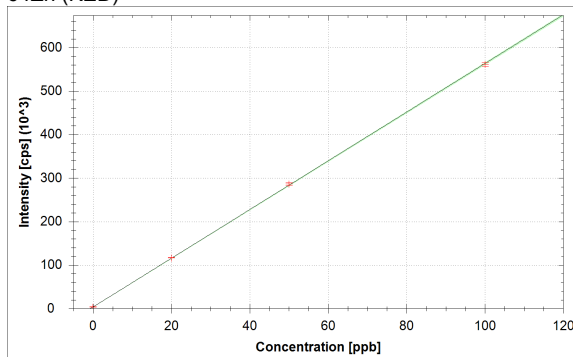

$$f(x) = 5596.9525 \cdot x + 3698.6229$$

$$R^2 = 0.9999$$

$$\text{BEC} = 0.661 \text{ ppb}$$

$$\text{LoD} = 0.1045 \text{ ppb}$$

69Ga (KED)

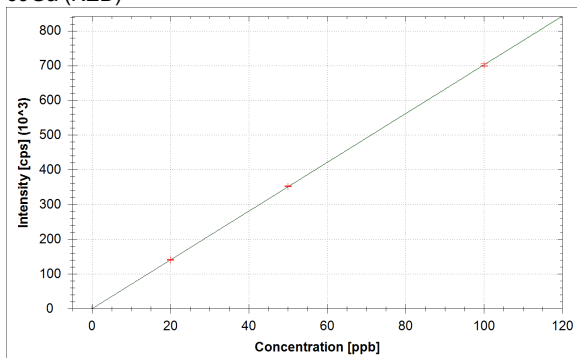

$$f(x) = 7019.5212 \cdot x + 88.0560$$

$$R^2 = 1.0000$$

$$\text{BEC} = 0.013 \text{ ppb}$$

$$\text{LoD} = 0.0165 \text{ ppb}$$

75As (KED)

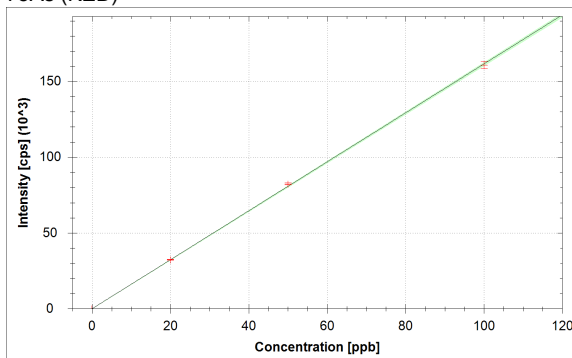

$$f(x) = 1615.6351 \cdot x + 11.0090$$

$$R^2 = 0.9998$$

$$\text{BEC} = 0.007 \text{ ppb}$$

$$\text{LoD} = 0.0143 \text{ ppb}$$

80Se (KED)

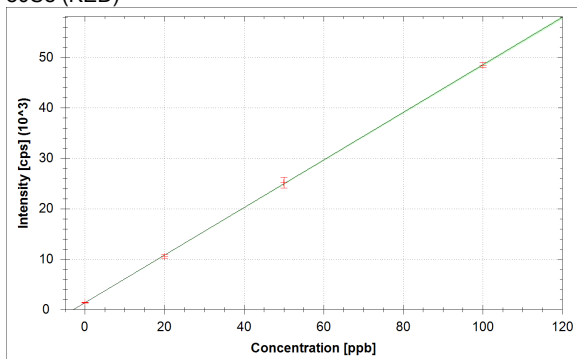

$$f(x) = 471.6996 \cdot x + 1354.6841$$

$$R^2 = 0.9999$$

$$\text{BEC} = 2.872 \text{ ppb}$$

$$\text{LoD} = 0.4165 \text{ ppb}$$

85Rb (KED)

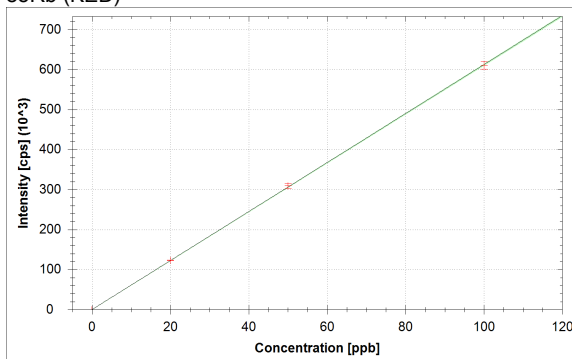

$$f(x) = 6122.5507 \cdot x + 84.8876$$

$$R^2 = 1.0000$$

$$\text{BEC} = 0.014 \text{ ppb}$$

$$\text{LoD} = 0.0077 \text{ ppb}$$

88Sr (KED)

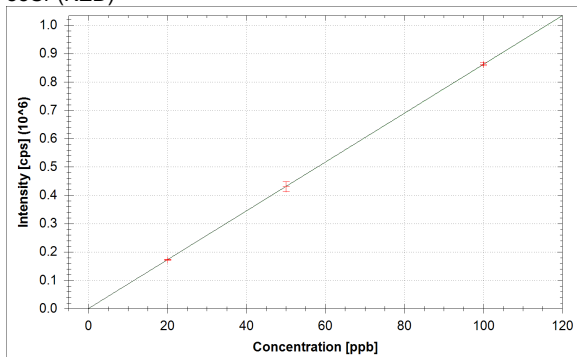

$$f(x) = 8619.6937 \cdot x + 121.0362$$

$$R^2 = 1.0000$$

$$\text{BEC} = 0.014 \text{ ppb}$$

$$\text{LoD} = 0.0107 \text{ ppb}$$

107Ag (KED)

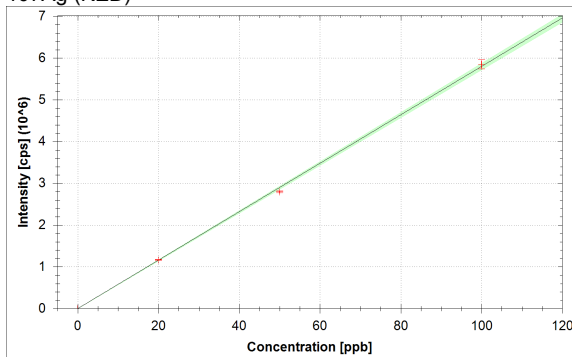

$$f(x) = 57995.7875 \cdot x + 17.4330$$

$$R^2 = 0.9994$$

$$\text{BEC} = 0.000 \text{ ppb}$$

$$\text{LoD} = 0.0003 \text{ ppb}$$

114Cd (KED)

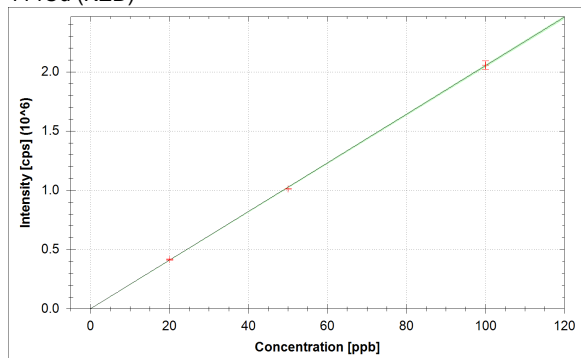

$$f(x) = 20504.8514 \cdot x + 28.4921$$

$$R^2 = 0.9999$$

$$\text{BEC} = 0.001 \text{ ppb}$$

$$\text{LoD} = 0.0009 \text{ ppb}$$

133Cs (KED)

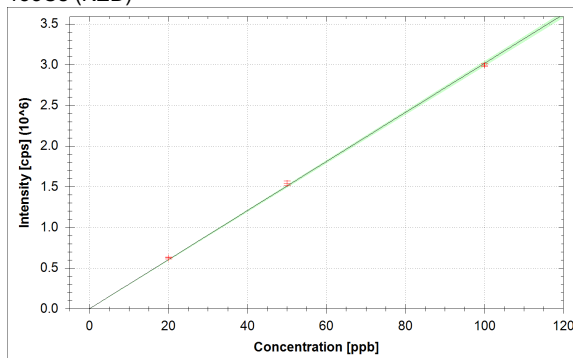

$$f(x) = 30139.5472 \cdot x + 19.7393$$

$$R^2 = 0.9997$$

$$\text{BEC} = 0.001 \text{ ppb}$$

$$\text{LoD} = 0.0011 \text{ ppb}$$

138Ba (KED)

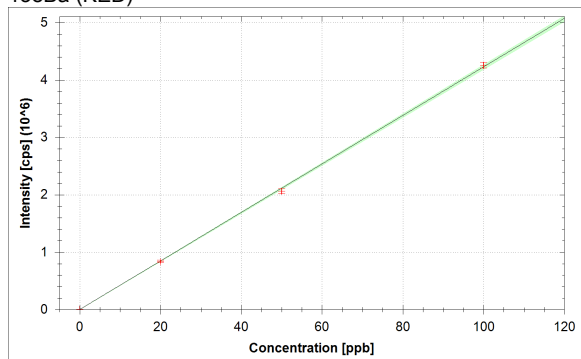

$$f(x) = 42274.4354 \cdot x + 1488.7921$$

$$R^2 = 0.9997$$

$$\text{BEC} = 0.035 \text{ ppb}$$

$$\text{LoD} = 0.0777 \text{ ppb}$$

139La (KED)

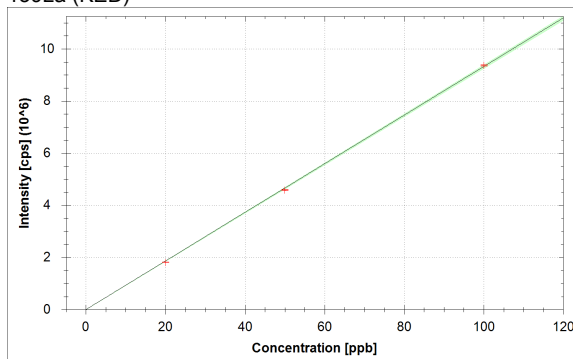

$$f(x) = 93221.1126 \cdot x + 28.0261$$

$$R^2 = 0.9998$$

$$\text{BEC} = 0.000 \text{ ppb}$$

$$\text{LoD} = 0.0001 \text{ ppb}$$

140Ce (KED)

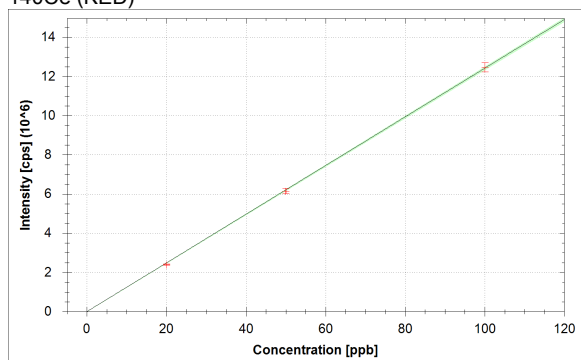

$$f(x) = 124203.9901 \cdot x + 331.5492$$

$$R^2 = 0.9999$$

$$\text{BEC} = 0.003 \text{ ppb}$$

$$\text{LoD} = 0.0006 \text{ ppb}$$

141Pr (KED)

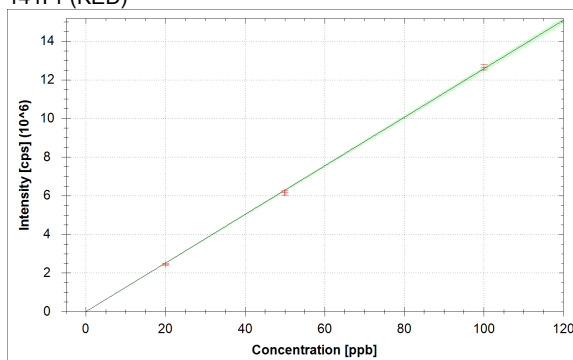

$$f(x) = 125616.2339 \cdot x + 17.8536$$

$$R^2 = 0.9997$$

$$\text{BEC} = 0.000 \text{ ppb}$$

$$\text{LoD} = 0.0001 \text{ ppb}$$

**<sup>142</sup>Nd (KED)**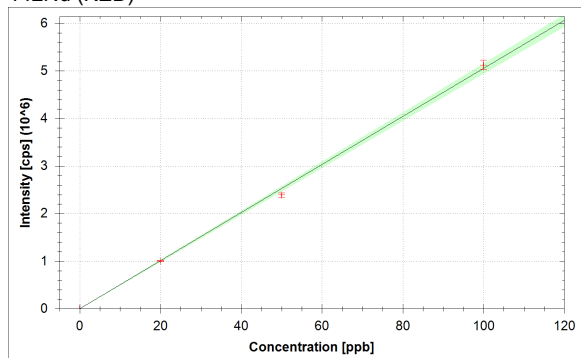

$$f(x) = 50521.8834 \cdot x + 56.1206$$

$$R^2 = 0.9987$$

$$\text{BEC} = 0.001 \text{ ppb}$$

$$\text{LoD} = 0.0004 \text{ ppb}$$

**<sup>152</sup>Sm (KED)**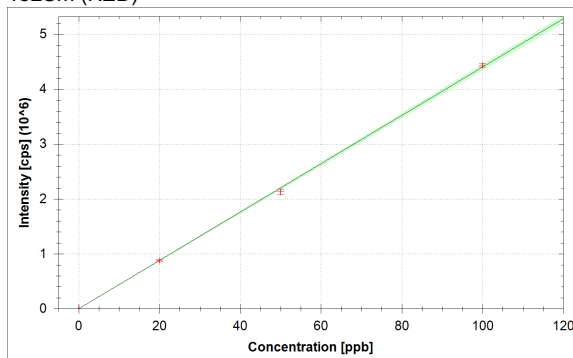

$$f(x) = 44037.5973 \cdot x + 2.2289$$

$$R^2 = 0.9995$$

$$\text{BEC} = 0.000 \text{ ppb}$$

$$\text{LoD} = 0.0005 \text{ ppb}$$

**<sup>153</sup>Eu (KED)**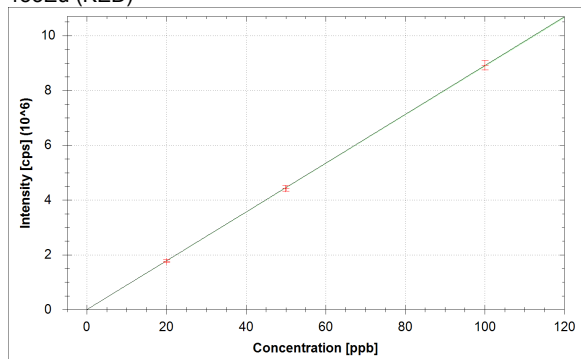

$$f(x) = 89019.7004 \cdot x + 6.7524$$

$$R^2 = 1.0000$$

$$\text{BEC} = 0.000 \text{ ppb}$$

$$\text{LoD} = 0.0001 \text{ ppb}$$

**<sup>158</sup>Gd (KED)**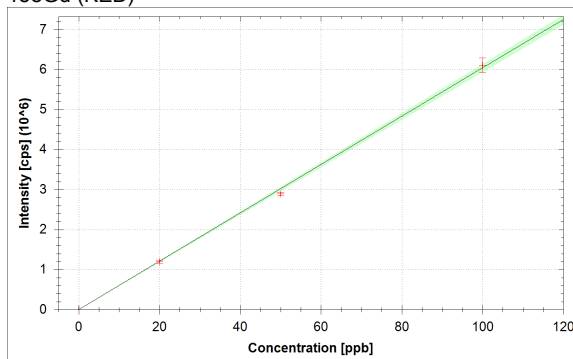

$$f(x) = 60414.8007 \cdot x + 1.1098$$

$$R^2 = 0.9992$$

$$\text{BEC} = 0.000 \text{ ppb}$$

$$\text{LoD} = 0.0001 \text{ ppb}$$

**<sup>164</sup>Dy (KED)**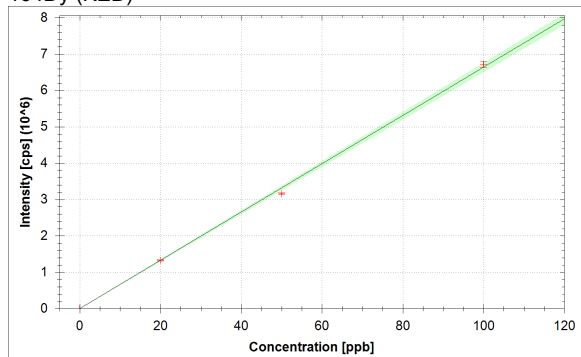

$$f(x) = 66386.5659 \cdot x + 15.7401$$

$$R^2 = 0.9990$$

$$\text{BEC} = 0.000 \text{ ppb}$$

$$\text{LoD} = 0.0006 \text{ ppb}$$

**<sup>166</sup>Er (KED)**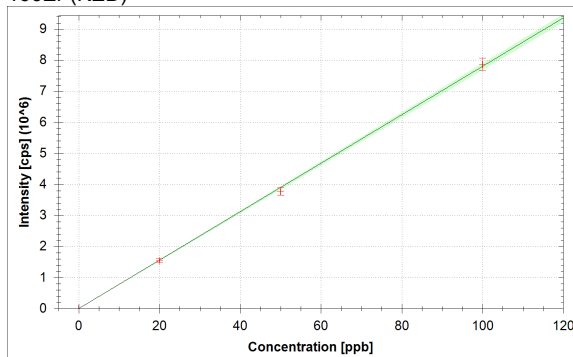

$$f(x) = 77996.6306 \cdot x + 309.5040$$

$$R^2 = 0.9995$$

$$\text{BEC} = 0.004 \text{ ppb}$$

$$\text{LoD} = 0.0012 \text{ ppb}$$

169Tm (KED)

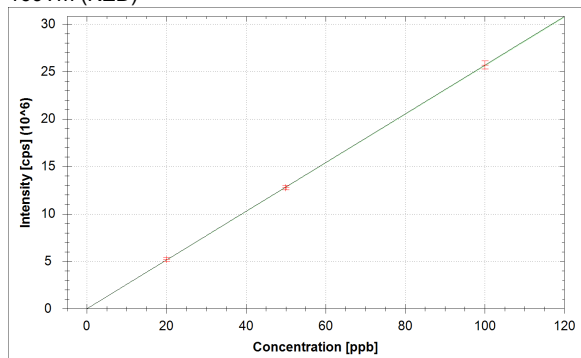

$$f(x) = 256563.9866 \cdot x + 8.9628$$

$$R^2 = 1.0000$$

$$\text{BEC} = 0.000 \text{ ppb}$$

$$\text{LoD} = 0.0000 \text{ ppb}$$

174Yb (KED)

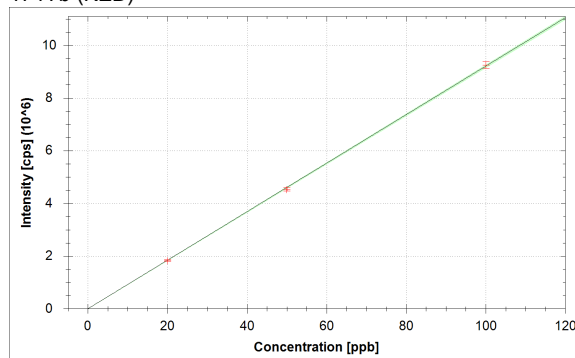

$$f(x) = 92094.1313 \cdot x + 13.4798$$

$$R^2 = 0.9999$$

$$\text{BEC} = 0.000 \text{ ppb}$$

$$\text{LoD} = 0.0004 \text{ ppb}$$

175Lu (KED)

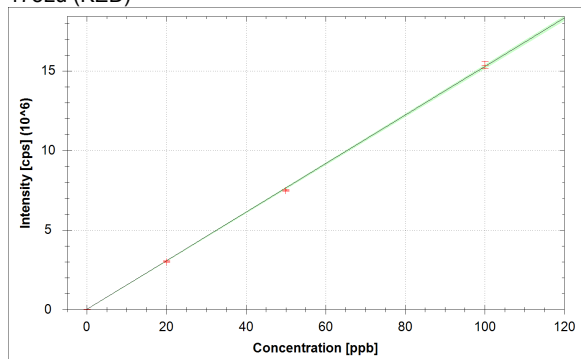

$$f(x) = 152522.0955 \cdot x + 18078.6193$$

$$R^2 = 0.9998$$

$$\text{BEC} = 0.119 \text{ ppb}$$

$$\text{LoD} = 0.0171 \text{ ppb}$$

205TI (KED)

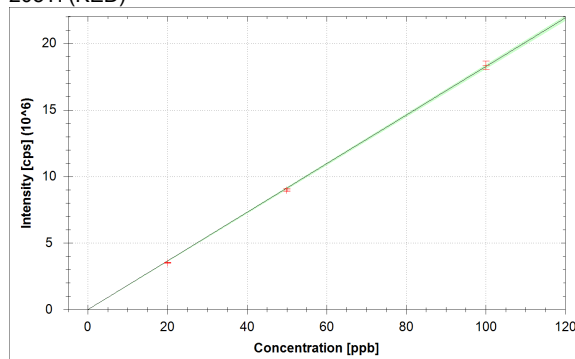

$$f(x) = 182620.6348 \cdot x + 22.1108$$

$$R^2 = 0.9998$$

$$\text{BEC} = 0.000 \text{ ppb}$$

$$\text{LoD} = 0.0002 \text{ ppb}$$

208Pb (KED)

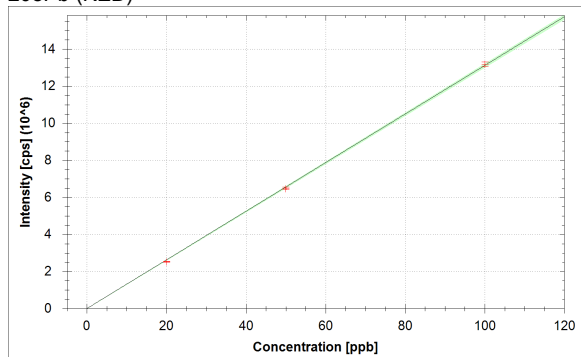

$$f(x) = 131142.4226 \cdot x + 4230.4322$$

$$R^2 = 0.9998$$

$$\text{BEC} = 0.032 \text{ ppb}$$

$$\text{LoD} = 0.0030 \text{ ppb}$$

232Th (KED)

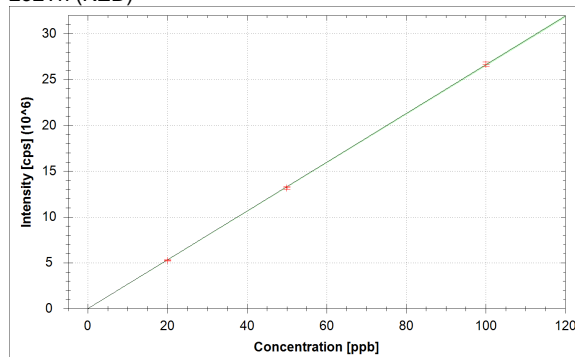

$$f(x) = 265957.7735 \cdot x + 87.3311$$

$$R^2 = 1.0000$$

$$\text{BEC} = 0.000 \text{ ppb}$$

$$\text{LoD} = 0.0003 \text{ ppb}$$

**<sup>238</sup>U (KED)**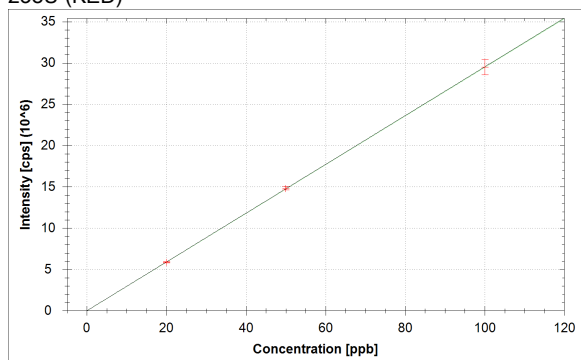

$$f(x) = 295226.5832 \cdot x + 49.7358$$

$$R^2 = 1.0000$$

$$\text{BEC} = 0.000 \text{ ppb}$$

$$\text{LoD} = 0.0008 \text{ ppb}$$

**Standards:**

Analysis Index: 3  
 Analysis Name: 0+20  
 Analysis Type: STD  
 Analysis Started at: 11/4/2021 2:52:05 PM  
 Standard (Stock): std0  
 Standard DF: 1

| Category    | Concentration average | Concentration RSD | Standard Concentration |
|-------------|-----------------------|-------------------|------------------------|
| 6Li (KED)   | 100.639 %             |                   |                        |
| 9Be (KED)   | 0.000 ppb             | 1.7 %             | 0.000 ppb              |
| 11B (KED)   | 0.000 ppb             | 0.0 %             | 0.000 ppb              |
| 24Mg (KED)  | 0.000 ppb             | 0.2 %             | 0.000 ppb              |
| 27Al (KED)  | 0.000 ppb             | 0.1 %             | 0.000 ppb              |
| 45Sc (KED)  | 100.250 %             |                   |                        |
| 51V (KED)   | 0.000 ppb             | 1.2 %             | 0.000 ppb              |
| 52Cr (KED)  | 0.000 ppb             | 0.1 %             | 0.000 ppb              |
| 55Mn (KED)  | 0.000 ppb             | 0.2 %             | 0.000 ppb              |
| 56Fe (KED)  | 0.000 ppb             | 0.0 %             | 0.000 ppb              |
| 58Ni (KED)  | 0.000 ppb             | 0.1 %             | 0.000 ppb              |
| 59Co (KED)  | 0.000 ppb             | 0.2 %             | 0.000 ppb              |
| 63Cu (KED)  | 0.000 ppb             | 0.1 %             | 0.000 ppb              |
| 64Zn (KED)  | 0.000 ppb             | 0.0 %             | 0.000 ppb              |
| 69Ga (KED)  | 0.000 ppb             | 0.1 %             | 0.000 ppb              |
| 75As (KED)  | 0.000 ppb             | 0.5 %             | 0.000 ppb              |
| 80Se (KED)  | 0.000 ppb             | 0.1 %             | 0.000 ppb              |
| 85Rb (KED)  | 0.000 ppb             | 0.3 %             | 0.000 ppb              |
| 88Sr (KED)  | 0.000 ppb             | 0.0 %             | 0.000 ppb              |
| 89Y (KED)   | 100.993 %             |                   |                        |
| 107Ag (KED) | 0.000 ppb             | 0.6 %             | 0.000 ppb              |
| 114Cd (KED) | 0.000 ppb             | 0.3 %             | 0.000 ppb              |
| 115In (KED) | 101.573 %             |                   |                        |
| 133Cs (KED) | 0.000 ppb             | 0.3 %             | 0.000 ppb              |
| 138Ba (KED) | 0.000 ppb             | 0.1 %             | 0.000 ppb              |
| 139La (KED) | 0.000 ppb             | 0.2 %             | 0.000 ppb              |
| 140Ce (KED) | 0.000 ppb             | 0.2 %             | 0.000 ppb              |
| 141Pr (KED) | 0.000 ppb             | 0.7 %             | 0.000 ppb              |
| 142Nd (KED) | 0.000 ppb             | 0.2 %             | 0.000 ppb              |
| 152Sm (KED) | 0.000 ppb             | 0.9 %             | 0.000 ppb              |
| 153Eu (KED) | 0.000 ppb             | 0.5 %             | 0.000 ppb              |
| 158Gd (KED) | 0.000 ppb             | 1.7 %             | 0.000 ppb              |
| 159Tb (KED) | 99.105 %              |                   |                        |
| 164Dy (KED) | 0.000 ppb             | 0.5 %             | 0.000 ppb              |
| 166Er (KED) | 0.000 ppb             | 0.0 %             | 0.000 ppb              |
| 169Tm (KED) | 0.000 ppb             | 0.6 %             | 0.000 ppb              |
| 174Yb (KED) | 0.000 ppb             | 0.3 %             | 0.000 ppb              |
| 175Lu (KED) | 0.000 ppb             | 0.0 %             | 0.000 ppb              |
| 205Tl (KED) | 0.000 ppb             | 0.1 %             | 0.000 ppb              |
| 208Pb (KED) | 0.000 ppb             | 0.0 %             | 0.000 ppb              |
| 209Bi (KED) | 100.515 %             |                   |                        |
| 232Th (KED) | 0.000 ppb             | 0.3 %             | 0.000 ppb              |
| 238U (KED)  | 0.000 ppb             | 0.3 %             | 0.000 ppb              |

**Standards:**

Analysis Index: 4  
 Analysis Name: 20+20  
 Analysis Type: STD  
 Analysis Started at: 11/4/2021 2:55:17 PM  
 Standard (Stock): std3  
 Standard DF: 1

| Category    | Concentration average | Concentration RSD | Standard Concentration |
|-------------|-----------------------|-------------------|------------------------|
| 6Li (KED)   | 101.128 %             |                   |                        |
| 9Be (KED)   | 19.558 ppb            | 2.0 %             | 20.000 ppb             |
| 11B (KED)   | 18.943 ppb            | 9.5 %             | 20.000 ppb             |
| 24Mg (KED)  | 19.480 ppb            | 5.1 %             | 20.000 ppb             |
| 27Al (KED)  | 19.982 ppb            | 2.3 %             | 20.000 ppb             |
| 45Sc (KED)  | 102.786 %             |                   |                        |
| 51V (KED)   | 19.914 ppb            | 2.3 %             | 20.000 ppb             |
| 52Cr (KED)  | 20.024 ppb            | 2.0 %             | 20.000 ppb             |
| 55Mn (KED)  | 19.818 ppb            | 0.9 %             | 20.000 ppb             |
| 56Fe (KED)  | 20.290 ppb            | 2.7 %             | 20.000 ppb             |
| 58Ni (KED)  | 20.218 ppb            | 2.8 %             | 20.000 ppb             |
| 59Co (KED)  | 20.061 ppb            | 2.3 %             | 20.000 ppb             |
| 63Cu (KED)  | 20.472 ppb            | 0.2 %             | 20.000 ppb             |
| 64Zn (KED)  | 20.206 ppb            | 0.3 %             | 20.000 ppb             |
| 69Ga (KED)  | 20.024 ppb            | 1.0 %             | 20.000 ppb             |
| 75As (KED)  | 19.998 ppb            | 1.1 %             | 20.000 ppb             |
| 80Se (KED)  | 19.482 ppb            | 3.5 %             | 20.000 ppb             |
| 85Rb (KED)  | 20.142 ppb            | 0.5 %             | 20.000 ppb             |
| 88Sr (KED)  | 19.955 ppb            | 0.7 %             | 20.000 ppb             |
| 89Y (KED)   | 102.504 %             |                   |                        |
| 107Ag (KED) | 20.078 ppb            | 0.6 %             | 20.000 ppb             |
| 114Cd (KED) | 20.225 ppb            | 1.2 %             | 20.000 ppb             |
| 115In (KED) | 100.211 %             |                   |                        |
| 133Cs (KED) | 20.687 ppb            | 1.8 %             | 20.000 ppb             |
| 138Ba (KED) | 19.775 ppb            | 3.0 %             | 20.000 ppb             |
| 139La (KED) | 19.436 ppb            | 0.3 %             | 20.000 ppb             |
| 140Ce (KED) | 19.244 ppb            | 1.2 %             | 20.000 ppb             |
| 141Pr (KED) | 19.461 ppb            | 2.3 %             | 20.000 ppb             |
| 142Nd (KED) | 19.874 ppb            | 1.6 %             | 20.000 ppb             |
| 152Sm (KED) | 19.921 ppb            | 2.1 %             | 20.000 ppb             |
| 153Eu (KED) | 19.858 ppb            | 3.1 %             | 20.000 ppb             |
| 158Gd (KED) | 19.858 ppb            | 3.4 %             | 20.000 ppb             |
| 159Tb (KED) | 101.475 %             |                   |                        |
| 164Dy (KED) | 19.970 ppb            | 1.1 %             | 20.000 ppb             |
| 166Er (KED) | 19.836 ppb            | 3.8 %             | 20.000 ppb             |
| 169Tm (KED) | 20.205 ppb            | 3.8 %             | 20.000 ppb             |
| 174Yb (KED) | 19.803 ppb            | 1.7 %             | 20.000 ppb             |
| 175Lu (KED) | 19.630 ppb            | 1.6 %             | 20.000 ppb             |
| 205Tl (KED) | 19.255 ppb            | 0.6 %             | 20.000 ppb             |
| 208Pb (KED) | 19.131 ppb            | 1.0 %             | 20.000 ppb             |
| 209Bi (KED) | 101.131 %             |                   |                        |
| 232Th (KED) | 19.752 ppb            | 1.2 %             | 20.000 ppb             |
| 238U (KED)  | 19.842 ppb            | 1.3 %             | 20.000 ppb             |

## Standards:

Analysis Index: 5  
 Analysis Name: 50+20  
 Analysis Type: STD  
 Analysis Started at: 11/4/2021 2:58:31 PM  
 Standard (Stock): std1  
 Standard DF: 1

| Category    | Concentration average | Concentration RSD | Standard Concentration |
|-------------|-----------------------|-------------------|------------------------|
| 6Li (KED)   | 100.414 %             |                   |                        |
| 9Be (KED)   | 48.989 ppb            | 6.2 %             | 50.000 ppb             |
| 11B (KED)   | 46.763 ppb            | 1.2 %             | 50.000 ppb             |
| 24Mg (KED)  | 48.026 ppb            | 4.4 %             | 50.000 ppb             |
| 27Al (KED)  | 49.889 ppb            | 2.4 %             | 50.000 ppb             |
| 45Sc (KED)  | 101.520 %             |                   |                        |
| 51V (KED)   | 49.844 ppb            | 1.7 %             | 50.000 ppb             |
| 52Cr (KED)  | 49.804 ppb            | 1.1 %             | 50.000 ppb             |
| 55Mn (KED)  | 50.265 ppb            | 1.3 %             | 50.000 ppb             |
| 56Fe (KED)  | 50.383 ppb            | 1.1 %             | 50.000 ppb             |
| 58Ni (KED)  | 50.760 ppb            | 1.3 %             | 50.000 ppb             |
| 59Co (KED)  | 49.838 ppb            | 1.0 %             | 50.000 ppb             |
| 63Cu (KED)  | 51.119 ppb            | 1.9 %             | 50.000 ppb             |
| 64Zn (KED)  | 50.559 ppb            | 1.2 %             | 50.000 ppb             |
| 69Ga (KED)  | 50.179 ppb            | 0.5 %             | 50.000 ppb             |
| 75As (KED)  | 50.937 ppb            | 0.8 %             | 50.000 ppb             |
| 80Se (KED)  | 50.484 ppb            | 4.5 %             | 50.000 ppb             |
| 85Rb (KED)  | 50.472 ppb            | 2.0 %             | 50.000 ppb             |
| 88Sr (KED)  | 49.910 ppb            | 4.2 %             | 50.000 ppb             |
| 89Y (KED)   | 101.341 %             |                   |                        |
| 107Ag (KED) | 48.173 ppb            | 0.9 %             | 50.000 ppb             |
| 114Cd (KED) | 49.345 ppb            | 0.2 %             | 50.000 ppb             |
| 115In (KED) | 102.109 %             |                   |                        |
| 133Cs (KED) | 51.061 ppb            | 1.9 %             | 50.000 ppb             |
| 138Ba (KED) | 48.708 ppb            | 2.0 %             | 50.000 ppb             |
| 139La (KED) | 49.164 ppb            | 0.4 %             | 50.000 ppb             |
| 140Ce (KED) | 49.505 ppb            | 2.1 %             | 50.000 ppb             |
| 141Pr (KED) | 48.876 ppb            | 1.8 %             | 50.000 ppb             |
| 142Nd (KED) | 47.304 ppb            | 2.0 %             | 50.000 ppb             |
| 152Sm (KED) | 48.374 ppb            | 2.3 %             | 50.000 ppb             |
| 153Eu (KED) | 49.692 ppb            | 2.2 %             | 50.000 ppb             |
| 158Gd (KED) | 47.894 ppb            | 1.4 %             | 50.000 ppb             |
| 159Tb (KED) | 103.497 %             |                   |                        |
| 164Dy (KED) | 47.562 ppb            | 0.9 %             | 50.000 ppb             |
| 166Er (KED) | 48.318 ppb            | 3.2 %             | 50.000 ppb             |
| 169Tm (KED) | 49.730 ppb            | 1.8 %             | 50.000 ppb             |
| 174Yb (KED) | 49.206 ppb            | 1.5 %             | 50.000 ppb             |
| 175Lu (KED) | 49.051 ppb            | 0.7 %             | 50.000 ppb             |
| 205Tl (KED) | 49.218 ppb            | 1.4 %             | 50.000 ppb             |
| 208Pb (KED) | 49.371 ppb            | 1.0 %             | 50.000 ppb             |
| 209Bi (KED) | 101.098 %             |                   |                        |
| 232Th (KED) | 49.577 ppb            | 1.3 %             | 50.000 ppb             |
| 238U (KED)  | 50.220 ppb            | 1.4 %             | 50.000 ppb             |

**Standards:**

Analysis Index: 6  
 Analysis Name: 100+20  
 Analysis Type: STD  
 Analysis Started at: 11/4/2021 3:01:35 PM  
 Standard (Stock): std2  
 Standard DF: 1

| Category    | Concentration average | Concentration RSD | Standard Concentration |
|-------------|-----------------------|-------------------|------------------------|
| 6Li (KED)   | 99.436 %              |                   |                        |
| 9Be (KED)   | 100.594 ppb           | 2.1 %             | 100.000 ppb            |
| 11B (KED)   | 101.830 ppb           | 2.9 %             | 100.000 ppb            |
| 24Mg (KED)  | 101.091 ppb           | 3.7 %             | 100.000 ppb            |
| 27Al (KED)  | 100.059 ppb           | 2.9 %             | 100.000 ppb            |
| 45Sc (KED)  | 103.811 %             |                   |                        |
| 51V (KED)   | 100.095 ppb           | 1.3 %             | 100.000 ppb            |
| 52Cr (KED)  | 100.093 ppb           | 0.8 %             | 100.000 ppb            |
| 55Mn (KED)  | 99.904 ppb            | 2.1 %             | 100.000 ppb            |
| 56Fe (KED)  | 99.751 ppb            | 1.1 %             | 100.000 ppb            |
| 58Ni (KED)  | 99.576 ppb            | 0.7 %             | 100.000 ppb            |
| 59Co (KED)  | 100.069 ppb           | 1.4 %             | 100.000 ppb            |
| 63Cu (KED)  | 99.346 ppb            | 0.8 %             | 100.000 ppb            |
| 64Zn (KED)  | 99.679 ppb            | 0.8 %             | 100.000 ppb            |
| 69Ga (KED)  | 99.906 ppb            | 0.6 %             | 100.000 ppb            |
| 75As (KED)  | 99.532 ppb            | 1.5 %             | 100.000 ppb            |
| 80Se (KED)  | 99.862 ppb            | 1.1 %             | 100.000 ppb            |
| 85Rb (KED)  | 99.736 ppb            | 1.6 %             | 100.000 ppb            |
| 88Sr (KED)  | 100.054 ppb           | 0.6 %             | 100.000 ppb            |
| 89Y (KED)   | 103.839 %             |                   |                        |
| 107Ag (KED) | 100.898 ppb           | 1.9 %             | 100.000 ppb            |
| 114Cd (KED) | 100.282 ppb           | 1.7 %             | 100.000 ppb            |
| 115In (KED) | 102.767 %             |                   |                        |
| 133Cs (KED) | 99.332 ppb            | 0.7 %             | 100.000 ppb            |
| 138Ba (KED) | 100.691 ppb           | 1.2 %             | 100.000 ppb            |
| 139La (KED) | 100.531 ppb           | 0.4 %             | 100.000 ppb            |
| 140Ce (KED) | 100.399 ppb           | 1.9 %             | 100.000 ppb            |
| 141Pr (KED) | 100.670 ppb           | 1.1 %             | 100.000 ppb            |
| 142Nd (KED) | 101.373 ppb           | 2.0 %             | 100.000 ppb            |
| 152Sm (KED) | 100.829 ppb           | 0.8 %             | 100.000 ppb            |
| 153Eu (KED) | 100.183 ppb           | 2.0 %             | 100.000 ppb            |
| 158Gd (KED) | 101.081 ppb           | 3.0 %             | 100.000 ppb            |
| 159Tb (KED) | 102.871 %             |                   |                        |
| 164Dy (KED) | 101.225 ppb           | 1.3 %             | 100.000 ppb            |
| 166Er (KED) | 100.874 ppb           | 2.5 %             | 100.000 ppb            |
| 169Tm (KED) | 100.094 ppb           | 1.6 %             | 100.000 ppb            |
| 174Yb (KED) | 100.436 ppb           | 1.3 %             | 100.000 ppb            |
| 175Lu (KED) | 100.548 ppb           | 1.5 %             | 100.000 ppb            |
| 205Tl (KED) | 100.540 ppb           | 1.8 %             | 100.000 ppb            |
| 208Pb (KED) | 100.488 ppb           | 0.9 %             | 100.000 ppb            |
| 209Bi (KED) | 99.764 %              |                   |                        |
| 232Th (KED) | 100.261 ppb           | 0.8 %             | 100.000 ppb            |
| 238U (KED)  | 99.922 ppb            | 3.2 %             | 100.000 ppb            |

## Sample List Summary:

Instrument ID: iCAP Q

| Index: | Label:               | Main<br>Runs: | Survey<br>Runs: | Start Time:          | User name:                    |
|--------|----------------------|---------------|-----------------|----------------------|-------------------------------|
| 1      | water                | 3             | 0               | 11/4/2021 2:45:50 PM | WINDOWS-UPCI4ER\Administrator |
| 2      | blk                  | 3             | 0               | 11/4/2021 2:48:52 PM | WINDOWS-UPCI4ER\Administrator |
| 3      | 0+20                 | 3             | 0               | 11/4/2021 2:52:05 PM | WINDOWS-UPCI4ER\Administrator |
| 4      | 20+20                | 3             | 0               | 11/4/2021 2:55:17 PM | WINDOWS-UPCI4ER\Administrator |
| 5      | 50+20                | 3             | 0               | 11/4/2021 2:58:31 PM | WINDOWS-UPCI4ER\Administrator |
| 6      | 100+20               | 3             | 0               | 11/4/2021 3:01:35 PM | WINDOWS-UPCI4ER\Administrator |
| 7      | 315042603860464 jian | 3             | 0               | 11/4/2021 3:04:44 PM | WINDOWS-UPCI4ER\Administrator |
| 8      | 315047603860522 jian | 3             | 0               | 11/4/2021 3:07:51 PM | WINDOWS-UPCI4ER\Administrator |
| 9      | 315047603860451      | 3             | 0               | 11/4/2021 3:10:55 PM | WINDOWS-UPCI4ER\Administrator |
| 10     | 315047603860477 jian | 3             | 0               | 11/4/2021 3:14:06 PM | WINDOWS-UPCI4ER\Administrator |
| 11     | 315047603860529 jian | 3             | 0               | 11/4/2021 3:17:15 PM | WINDOWS-UPCI4ER\Administrator |
| 12     | 315042603860503 jian | 3             | 0               | 11/4/2021 3:20:20 PM | WINDOWS-UPCI4ER\Administrator |
| 13     | 305047603860518 jian | 3             | 0               | 11/4/2021 3:23:25 PM | WINDOWS-UPCI4ER\Administrator |
| 14     | 315047603860510      | 3             | 0               | 11/4/2021 3:26:36 PM | WINDOWS-UPCI4ER\Administrator |
| 15     | 315047603860447 jian | 3             | 0               | 11/4/2021 3:29:43 PM | WINDOWS-UPCI4ER\Administrator |
| 16     | 315047603860470jian  | 3             | 0               | 11/4/2021 3:32:46 PM | WINDOWS-UPCI4ER\Administrator |
| 17     | 315047603860444 jian | 3             | 0               | 11/4/2021 3:35:56 PM | WINDOWS-UPCI4ER\Administrator |
| 18     | 315047603860458      | 3             | 0               | 11/4/2021 3:39:15 PM | WINDOWS-UPCI4ER\Administrator |
| 19     | 315047603860441      | 3             | 0               | 11/4/2021 3:42:29 PM | WINDOWS-UPCI4ER\Administrator |
| 20     | 315047603860496 jian | 3             | 0               | 11/4/2021 3:45:41 PM | WINDOWS-UPCI4ER\Administrator |
| 21     | 315047603860524      | 3             | 0               | 11/4/2021 3:48:58 PM | WINDOWS-UPCI4ER\Administrator |
| 22     | 315047603860497 jian | 3             | 0               | 11/4/2021 3:52:11 PM | WINDOWS-UPCI4ER\Administrator |
| 23     | 315047603860505      | 3             | 0               | 11/4/2021 3:55:22 PM | WINDOWS-UPCI4ER\Administrator |
| 24     | 315047603860452 jian | 3             | 0               | 11/4/2021 3:58:47 PM | WINDOWS-UPCI4ER\Administrator |
| 25     | 315047603860504      | 3             | 0               | 11/4/2021 4:02:01 PM | WINDOWS-UPCI4ER\Administrator |
| 26     | 315047603860520jian  | 3             | 0               | 11/4/2021 4:05:13 PM | WINDOWS-UPCI4ER\Administrator |
| 27     | 315047603860508jian  | 3             | 0               | 11/4/2021 4:08:24 PM | WINDOWS-UPCI4ER\Administrator |
| 28     | 305047603860469jian  | 3             | 0               | 11/4/2021 4:11:56 PM | WINDOWS-UPCI4ER\Administrator |
| 29     | 315042603860515jian  | 3             | 0               | 11/4/2021 4:17:15 PM | WINDOWS-UPCI4ER\Administrator |
| 30     | 315042603860521jian  | 3             | 0               | 11/4/2021 4:20:25 PM | WINDOWS-UPCI4ER\Administrator |
| 31     | 270jian              | 1             | 0               | 11/4/2021 4:23:35 PM | WINDOWS-UPCI4ER\Administrator |
| 32     | 272jian              | 1             | 0               | 11/4/2021 4:25:26 PM | WINDOWS-UPCI4ER\Administrator |
| 33     | 17064jian            | 1             | 0               | 11/4/2021 4:27:14 PM | WINDOWS-UPCI4ER\Administrator |
| 34     | 17036jian            | 1             | 0               | 11/4/2021 4:29:07 PM | WINDOWS-UPCI4ER\Administrator |
| 35     | 266jian              | 1             | 0               | 11/4/2021 4:30:57 PM | WINDOWS-UPCI4ER\Administrator |
| 36     | 278 jian             | 1             | 0               | 11/4/2021 4:32:45 PM | WINDOWS-UPCI4ER\Administrator |
| 37     | 16005 jian           | 1             | 0               | 11/4/2021 4:34:35 PM | WINDOWS-UPCI4ER\Administrator |
| 38     | 16092jian            | 1             | 0               | 11/4/2021 4:36:20 PM | WINDOWS-UPCI4ER\Administrator |
| 39     | 262jian              | 1             | 0               | 11/4/2021 4:38:06 PM | WINDOWS-UPCI4ER\Administrator |
| 40     | 17080jian            | 1             | 0               | 11/4/2021 4:39:53 PM | WINDOWS-UPCI4ER\Administrator |
| 41     | 280jian              | 1             | 0               | 11/4/2021 4:41:38 PM | WINDOWS-UPCI4ER\Administrator |
| 42     | 18074jian            | 1             | 0               | 11/4/2021 4:43:23 PM | WINDOWS-UPCI4ER\Administrator |
| 43     | 276jian              | 1             | 0               | 11/4/2021 4:45:10 PM | WINDOWS-UPCI4ER\Administrator |
| 44     | 001152921177301jian  | 1             | 0               | 11/4/2021 4:46:55 PM | WINDOWS-UPCI4ER\Administrator |
| 45     | 274jian              | 1             | 0               | 11/4/2021 4:48:42 PM | WINDOWS-UPCI4ER\Administrator |
| 46     | 264jian              | 1             | 0               | 11/4/2021 4:50:29 PM | WINDOWS-UPCI4ER\Administrator |
| 47     | 17342jian            | 1             | 0               | 11/4/2021 4:52:17 PM | WINDOWS-UPCI4ER\Administrator |
| 48     | 17322jian            | 1             | 0               | 11/4/2021 4:54:04 PM | WINDOWS-UPCI4ER\Administrator |

## Sample Summary

Instrument ID: iCAP Q

Analysis index: 1

Analysis name: water

Analysis started at: 11/4/2021 2:45:50 PM

User name: WINDOWS-UPCI4ER\Administrator

| Category    | Concentration average | Concentration RSD |
|-------------|-----------------------|-------------------|
| 6Li (KED)   | 0.000 %               |                   |
| 11B (KED)   | Infinity ppb          |                   |
| 27Al (KED)  | 78.756 ppb            | 121.3 %           |
| 45Sc (KED)  | 0.043 %               | 42.9 %            |
| 51V (KED)   | 0.263 ppb             | 173.5 %           |
| 52Cr (KED)  | 7.458 ppb             | 46.7 %            |
| 55Mn (KED)  | 2.176 ppb             | 68.1 %            |
| 56Fe (KED)  | 52.990 ppb            | 48.0 %            |
| 58Ni (KED)  | 16.285 ppb            | 39.1 %            |
| 59Co (KED)  | -0.001 ppb            | 0.0 %             |
| 63Cu (KED)  | Infinity ppb          |                   |
| 64Zn (KED)  | Infinity ppb          |                   |
| 69Ga (KED)  | Infinity ppb          |                   |
| 75As (KED)  | Infinity ppb          |                   |
| 80Se (KED)  | Infinity ppb          |                   |
| 89Y (KED)   | 0.000 %               |                   |
| 107Ag (KED) | Infinity ppb          |                   |
| 115In (KED) | 0.000 %               |                   |
| 138Ba (KED) | Infinity ppb          |                   |
| 159Tb (KED) | 0.000 %               |                   |
| 205Tl (KED) | 79.192 ppb            | 27.5 %            |
| 208Pb (KED) | 24.266 ppb            | 62.7 %            |
| 209Bi (KED) | 0.001 %               | 17.3 %            |
| 232Th (KED) | 0.553 ppb             | 173.3 %           |
| 238U (KED)  | 0.000 ppb             | 0.0 %             |

| Category    | Concentration average | Intensity average | Intensity RSD |
|-------------|-----------------------|-------------------|---------------|
| 6Li (KED)   | 0.000 %               | 0 cps             |               |
| 9Be (KED)   |                       | 1 cps             | 173.2 %       |
| 11B (KED)   | Infinity ppb          | 11 cps            | 34.6 %        |
| 24Mg (KED)  |                       | 1 cps             | 173.2 %       |
| 27Al (KED)  | 78.756 ppb            | 3 cps             | 100.0 %       |
| 45Sc (KED)  | 0.043 %               | 23 cps            | 42.9 %        |
| 51V (KED)   | 0.263 ppb             | 1 cps             | 173.2 %       |
| 52Cr (KED)  | 7.458 ppb             | 43 cps            | 7.7 %         |
| 55Mn (KED)  | 2.176 ppb             | 6 cps             | 34.6 %        |
| 56Fe (KED)  | 52.990 ppb            | 270 cps           | 4.5 %         |
| 58Ni (KED)  | 16.285 ppb            | 111 cps           | 22.7 %        |
| 59Co (KED)  | -0.001 ppb            | 0 cps             |               |
| 63Cu (KED)  | Infinity ppb          | 23 cps            | 14.3 %        |
| 64Zn (KED)  | Infinity ppb          | 104 cps           | 4.9 %         |
| 69Ga (KED)  | Infinity ppb          | 4 cps             | 43.3 %        |
| 75As (KED)  | Infinity ppb          | 18 cps            | 10.8 %        |
| 80Se (KED)  | Infinity ppb          | 1,252 cps         | 6.5 %         |
| 85Rb (KED)  |                       | 1 cps             | 173.2 %       |
| 88Sr (KED)  |                       | 0 cps             |               |
| 89Y (KED)   | 0.000 %               | 0 cps             |               |
| 107Ag (KED) | Infinity ppb          | 8 cps             | 65.5 %        |
| 114Cd (KED) |                       | 3 cps             | 100.0 %       |
| 115In (KED) | 0.000 %               | 0 cps             |               |

| Category    | Concentration average | Intensity average | Intensity RSD |
|-------------|-----------------------|-------------------|---------------|
| 133Cs (KED) |                       | 0 cps             |               |
| 138Ba (KED) | Infinity ppb          | 52 cps            | 19.5 %        |
| 139La (KED) |                       | 0 cps             |               |
| 140Ce (KED) |                       | 1 cps             | 173.2 %       |
| 141Pr (KED) |                       | 0 cps             |               |
| 142Nd (KED) |                       | 0 cps             |               |
| 152Sm (KED) |                       | 0 cps             |               |
| 153Eu (KED) |                       | 0 cps             |               |
| 158Gd (KED) |                       | 0 cps             |               |
| 159Tb (KED) | 0.000 %               | 0 cps             |               |
| 164Dy (KED) |                       | 0 cps             |               |
| 166Er (KED) |                       | 0 cps             |               |
| 169Tm (KED) |                       | 0 cps             |               |
| 174Yb (KED) |                       | 0 cps             |               |
| 175Lu (KED) |                       | 0 cps             |               |
| 205Tl (KED) | 79.192 ppb            | 89 cps            | 17.7 %        |
| 208Pb (KED) | 24.266 ppb            | 19 cps            | 53.9 %        |
| 209Bi (KED) | 0.001 %               | 22 cps            | 17.3 %        |
| 232Th (KED) | 0.553 ppb             | 1 cps             | 173.2 %       |
| 238U (KED)  | 0.000 ppb             | 0 cps             |               |

## Sample Summary

Instrument ID: iCAP Q

Analysis index: 2

Analysis name: blk

Analysis started at: 11/4/2021 2:48:52 PM

User name: WINDOWS-UPCI4ER\Administrator

| Category    | Concentration average | Concentration RSD |
|-------------|-----------------------|-------------------|
| 6Li (KED)   | 100.000 %             |                   |
| 9Be (KED)   | -0.007 ppb            | 0.0 %             |
| 11B (KED)   | 0.537 ppb             | 198.4 %           |
| 24Mg (KED)  | -0.059 ppb            | 57.7 %            |
| 27Al (KED)  | 0.162 ppb             | 17.0 %            |
| 45Sc (KED)  | 100.000 %             |                   |
| 51V (KED)   | 0.000 ppb             | 58.1 %            |
| 52Cr (KED)  | -0.001 ppb            | 107.9 %           |
| 55Mn (KED)  | -0.002 ppb            | 82.2 %            |
| 56Fe (KED)  | 0.106 ppb             | 178.4 %           |
| 58Ni (KED)  | 0.000 ppb             | 920.5 %           |
| 59Co (KED)  | 0.000 ppb             | 1,129.2 %         |
| 63Cu (KED)  | 0.001 ppb             | 23.2 %            |
| 64Zn (KED)  | -0.090 ppb            | 38.6 %            |
| 69Ga (KED)  | 0.002 ppb             | 356.7 %           |
| 75As (KED)  | 0.004 ppb             | 113.7 %           |
| 80Se (KED)  | 0.059 ppb             | 236.4 %           |
| 85Rb (KED)  | -0.004 ppb            | 62.9 %            |
| 88Sr (KED)  | -0.004 ppb            | 79.9 %            |
| 89Y (KED)   | 100.000 %             |                   |
| 107Ag (KED) | 0.000 ppb             | 182.1 %           |
| 114Cd (KED) | 0.000 ppb             | 67.8 %            |
| 115In (KED) | 100.000 %             |                   |
| 133Cs (KED) | 0.000 ppb             | 142.3 %           |
| 138Ba (KED) | 0.017 ppb             | 149.4 %           |
| 139La (KED) | 0.000 ppb             | 875.3 %           |
| 140Ce (KED) | 0.000 ppb             | 933.0 %           |
| 141Pr (KED) | 0.000 ppb             | 43.5 %            |
| 142Nd (KED) | 0.000 ppb             | 45.1 %            |
| 152Sm (KED) | 0.000 ppb             | 353.9 %           |
| 153Eu (KED) | 0.000 ppb             | 165.8 %           |
| 158Gd (KED) | 0.000 ppb             | 26.2 %            |
| 159Tb (KED) | 100.000 %             |                   |
| 164Dy (KED) | 0.000 ppb             | 653.7 %           |
| 166Er (KED) | 0.000 ppb             | 253.0 %           |
| 169Tm (KED) | 0.000 ppb             | 322.0 %           |
| 174Yb (KED) | 0.000 ppb             | 150.8 %           |
| 175Lu (KED) | 0.002 ppb             | 234.9 %           |
| 205Tl (KED) | 0.000 ppb             | 223.5 %           |
| 208Pb (KED) | 0.000 ppb             | 348.6 %           |
| 209Bi (KED) | 100.000 %             |                   |
| 232Th (KED) | 0.000 ppb             | 141.6 %           |
| 238U (KED)  | 0.000 ppb             | 90.5 %            |

| Category   | Concentration average | Intensity average | Intensity RSD |
|------------|-----------------------|-------------------|---------------|
| 6Li (KED)  | 100.000 %             | 2,955 cps         | 1.0 %         |
| 9Be (KED)  | -0.007 ppb            | 0 cps             |               |
| 11B (KED)  | 0.537 ppb             | 881 cps           | 8.8 %         |
| 24Mg (KED) | -0.059 ppb            | 160 cps           | 12.7 %        |
| 27Al (KED) | 0.162 ppb             | 131 cps           | 3.9 %         |

| Category    | Concentration average | Intensity average | Intensity RSD |
|-------------|-----------------------|-------------------|---------------|
| 45Sc (KED)  | 100.000 %             | 54,025 cps        | 1.2 %         |
| 51V (KED)   | 0.000 ppb             | 8 cps             | 24.7 %        |
| 52Cr (KED)  | -0.001 ppb            | 77 cps            | 23.0 %        |
| 55Mn (KED)  | -0.002 ppb            | 54 cps            | 19.7 %        |
| 56Fe (KED)  | 0.106 ppb             | 3,622 cps         | 69.3 %        |
| 58Ni (KED)  | 0.000 ppb             | 359 cps           | 13.0 %        |
| 59Co (KED)  | 0.000 ppb             | 28 cps            | 48.5 %        |
| 63Cu (KED)  | 0.001 ppb             | 578 cps           | 1.5 %         |
| 64Zn (KED)  | -0.090 ppb            | 3,194 cps         | 5.8 %         |
| 69Ga (KED)  | 0.002 ppb             | 99 cps            | 39.1 %        |
| 75As (KED)  | 0.004 ppb             | 18 cps            | 43.3 %        |
| 80Se (KED)  | 0.059 ppb             | 1,382 cps         | 4.6 %         |
| 85Rb (KED)  | -0.004 ppb            | 60 cps            | 25.5 %        |
| 88Sr (KED)  | -0.004 ppb            | 82 cps            | 36.8 %        |
| 89Y (KED)   | 100.000 %             | 466,070 cps       | 0.7 %         |
| 107Ag (KED) | 0.000 ppb             | 21 cps            | 32.9 %        |
| 114Cd (KED) | 0.000 ppb             | 38 cps            | 18.4 %        |
| 115In (KED) | 100.000 %             | 829,846 cps       | 2.4 %         |
| 133Cs (KED) | 0.000 ppb             | 28 cps            | 42.1 %        |
| 138Ba (KED) | 0.017 ppb             | 2,233 cps         | 51.0 %        |
| 139La (KED) | 0.000 ppb             | 28 cps            | 6.9 %         |
| 140Ce (KED) | 0.000 ppb             | 329 cps           | 5.6 %         |
| 141Pr (KED) | 0.000 ppb             | 10 cps            | 33.3 %        |
| 142Nd (KED) | 0.000 ppb             | 42 cps            | 16.4 %        |
| 152Sm (KED) | 0.000 ppb             | 4 cps             | 173.2 %       |
| 153Eu (KED) | 0.000 ppb             | 4 cps             | 86.6 %        |
| 158Gd (KED) | 0.000 ppb             | 9 cps             | 21.7 %        |
| 159Tb (KED) | 100.000 %             | 4,310,233 cps     | 1.6 %         |
| 164Dy (KED) | 0.000 ppb             | 18 cps            | 75.8 %        |
| 166Er (KED) | 0.000 ppb             | 297 cps           | 9.2 %         |
| 169Tm (KED) | 0.000 ppb             | 10 cps            | 33.3 %        |
| 174Yb (KED) | 0.000 ppb             | 21 cps            | 55.5 %        |
| 175Lu (KED) | 0.002 ppb             | 18,439 cps        | 3.3 %         |
| 205Tl (KED) | 0.000 ppb             | 28 cps            | 45.4 %        |
| 208Pb (KED) | 0.000 ppb             | 4,267 cps         | 2.1 %         |
| 209Bi (KED) | 100.000 %             | 3,529,741 cps     | 1.4 %         |
| 232Th (KED) | 0.000 ppb             | 103 cps           | 22.6 %        |
| 238U (KED)  | 0.000 ppb             | 132 cps           | 55.3 %        |

## Sample Summary

Instrument ID: iCAP Q

Analysis index: 3

Analysis name: 0+20

Analysis started at: 11/4/2021 2:52:05 PM

User name: WINDOWS-UPCI4ER\Administrator

| Category    | Concentration average | Concentration RSD |
|-------------|-----------------------|-------------------|
| 6Li (KED)   | 100.639 %             |                   |
| 9Be (KED)   | 0.000 ppb             | 1.7 %             |
| 11B (KED)   | 0.000 ppb             | 0.0 %             |
| 24Mg (KED)  | 0.000 ppb             | 0.2 %             |
| 27Al (KED)  | 0.000 ppb             | 0.1 %             |
| 45Sc (KED)  | 100.250 %             |                   |
| 51V (KED)   | 0.000 ppb             | 1.2 %             |
| 52Cr (KED)  | 0.000 ppb             | 0.1 %             |
| 55Mn (KED)  | 0.000 ppb             | 0.2 %             |
| 56Fe (KED)  | 0.000 ppb             | 0.0 %             |
| 58Ni (KED)  | 0.000 ppb             | 0.1 %             |
| 59Co (KED)  | 0.000 ppb             | 0.2 %             |
| 63Cu (KED)  | 0.000 ppb             | 0.1 %             |
| 64Zn (KED)  | 0.000 ppb             | 0.0 %             |
| 69Ga (KED)  | 0.000 ppb             | 0.1 %             |
| 75As (KED)  | 0.000 ppb             | 0.5 %             |
| 80Se (KED)  | 0.000 ppb             | 0.1 %             |
| 85Rb (KED)  | 0.000 ppb             | 0.3 %             |
| 88Sr (KED)  | 0.000 ppb             | 0.0 %             |
| 89Y (KED)   | 100.993 %             |                   |
| 107Ag (KED) | 0.000 ppb             | 0.6 %             |
| 114Cd (KED) | 0.000 ppb             | 0.3 %             |
| 115In (KED) | 101.573 %             |                   |
| 133Cs (KED) | 0.000 ppb             | 0.3 %             |
| 138Ba (KED) | 0.000 ppb             | 0.1 %             |
| 139La (KED) | 0.000 ppb             | 0.2 %             |
| 140Ce (KED) | 0.000 ppb             | 0.2 %             |
| 141Pr (KED) | 0.000 ppb             | 0.7 %             |
| 142Nd (KED) | 0.000 ppb             | 0.2 %             |
| 152Sm (KED) | 0.000 ppb             | 0.9 %             |
| 153Eu (KED) | 0.000 ppb             | 0.5 %             |
| 158Gd (KED) | 0.000 ppb             | 1.7 %             |
| 159Tb (KED) | 99.105 %              |                   |
| 164Dy (KED) | 0.000 ppb             | 0.5 %             |
| 166Er (KED) | 0.000 ppb             | 0.0 %             |
| 169Tm (KED) | 0.000 ppb             | 0.6 %             |
| 174Yb (KED) | 0.000 ppb             | 0.3 %             |
| 175Lu (KED) | 0.000 ppb             | 0.0 %             |
| 205Tl (KED) | 0.000 ppb             | 0.1 %             |
| 208Pb (KED) | 0.000 ppb             | 0.0 %             |
| 209Bi (KED) | 100.515 %             |                   |
| 232Th (KED) | 0.000 ppb             | 0.3 %             |
| 238U (KED)  | 0.000 ppb             | 0.3 %             |

| Category   | Concentration average | Intensity average | Intensity RSD |
|------------|-----------------------|-------------------|---------------|
| 6Li (KED)  | 100.639 %             | 2,974 cps         | 4.8 %         |
| 9Be (KED)  | 0.000 ppb             | 1 cps             | 173.2 %       |
| 11B (KED)  | 0.000 ppb             | 843 cps           | 4.9 %         |
| 24Mg (KED) | 0.000 ppb             | 196 cps           | 13.7 %        |
| 27Al (KED) | 0.000 ppb             | 108 cps           | 7.8 %         |

| Category    | Concentration average | Intensity average | Intensity RSD |
|-------------|-----------------------|-------------------|---------------|
| 45Sc (KED)  | 100.250 %             | 54,159 cps        | 0.7 %         |
| 51V (KED)   | 0.000 ppb             | 4 cps             | 114.6 %       |
| 52Cr (KED)  | 0.000 ppb             | 92 cps            | 12.7 %        |
| 55Mn (KED)  | 0.000 ppb             | 67 cps            | 15.0 %        |
| 56Fe (KED)  | 0.000 ppb             | 2,210 cps         | 3.8 %         |
| 58Ni (KED)  | 0.000 ppb             | 354 cps           | 11.2 %        |
| 59Co (KED)  | 0.000 ppb             | 29 cps            | 17.6 %        |
| 63Cu (KED)  | 0.000 ppb             | 553 cps           | 7.9 %         |
| 64Zn (KED)  | 0.000 ppb             | 3,735 cps         | 1.1 %         |
| 69Ga (KED)  | 0.000 ppb             | 89 cps            | 8.7 %         |
| 75As (KED)  | 0.000 ppb             | 11 cps            | 45.8 %        |
| 80Se (KED)  | 0.000 ppb             | 1,368 cps         | 5.5 %         |
| 85Rb (KED)  | 0.000 ppb             | 86 cps            | 33.6 %        |
| 88Sr (KED)  | 0.000 ppb             | 122 cps           | 1.6 %         |
| 89Y (KED)   | 100.993 %             | 470,700 cps       | 0.9 %         |
| 107Ag (KED) | 0.000 ppb             | 18 cps            | 57.3 %        |
| 114Cd (KED) | 0.000 ppb             | 29 cps            | 26.6 %        |
| 115In (KED) | 101.573 %             | 842,903 cps       | 1.1 %         |
| 133Cs (KED) | 0.000 ppb             | 20 cps            | 33.3 %        |
| 138Ba (KED) | 0.000 ppb             | 1,475 cps         | 7.7 %         |
| 139La (KED) | 0.000 ppb             | 28 cps            | 25.0 %        |
| 140Ce (KED) | 0.000 ppb             | 329 cps           | 19.8 %        |
| 141Pr (KED) | 0.000 ppb             | 18 cps            | 65.8 %        |
| 142Nd (KED) | 0.000 ppb             | 56 cps            | 18.3 %        |
| 152Sm (KED) | 0.000 ppb             | 2 cps             | 86.6 %        |
| 153Eu (KED) | 0.000 ppb             | 7 cps             | 50.0 %        |
| 158Gd (KED) | 0.000 ppb             | 1 cps             | 173.2 %       |
| 159Tb (KED) | 99.105 %              | 4,271,658 cps     | 1.1 %         |
| 164Dy (KED) | 0.000 ppb             | 16 cps            | 44.6 %        |
| 166Er (KED) | 0.000 ppb             | 307 cps           | 3.9 %         |
| 169Tm (KED) | 0.000 ppb             | 9 cps             | 57.3 %        |
| 174Yb (KED) | 0.000 ppb             | 13 cps            | 25.0 %        |
| 175Lu (KED) | 0.000 ppb             | 17,915 cps        | 1.3 %         |
| 205Tl (KED) | 0.000 ppb             | 22 cps            | 8.7 %         |
| 208Pb (KED) | 0.000 ppb             | 4,252 cps         | 2.5 %         |
| 209Bi (KED) | 100.515 %             | 3,547,930 cps     | 0.5 %         |
| 232Th (KED) | 0.000 ppb             | 88 cps            | 25.3 %        |
| 238U (KED)  | 0.000 ppb             | 50 cps            | 26.7 %        |

## Sample Summary

Instrument ID: iCAP Q

Analysis index: 4

Analysis name: 20+20

Analysis started at: 11/4/2021 2:55:17 PM

User name: WINDOWS-UPCI4ER\Administrator

| Category    | Concentration average | Concentration RSD |
|-------------|-----------------------|-------------------|
| 6Li (KED)   | 101.128 %             |                   |
| 9Be (KED)   | 19.558 ppb            | 2.0 %             |
| 11B (KED)   | 18.943 ppb            | 9.5 %             |
| 24Mg (KED)  | 19.480 ppb            | 5.1 %             |
| 27Al (KED)  | 19.982 ppb            | 2.3 %             |
| 45Sc (KED)  | 102.786 %             |                   |
| 51V (KED)   | 19.914 ppb            | 2.3 %             |
| 52Cr (KED)  | 20.024 ppb            | 2.0 %             |
| 55Mn (KED)  | 19.818 ppb            | 0.9 %             |
| 56Fe (KED)  | 20.290 ppb            | 2.7 %             |
| 58Ni (KED)  | 20.218 ppb            | 2.8 %             |
| 59Co (KED)  | 20.061 ppb            | 2.3 %             |
| 63Cu (KED)  | 20.472 ppb            | 0.2 %             |
| 64Zn (KED)  | 20.206 ppb            | 0.3 %             |
| 69Ga (KED)  | 20.024 ppb            | 1.0 %             |
| 75As (KED)  | 19.998 ppb            | 1.1 %             |
| 80Se (KED)  | 19.482 ppb            | 3.5 %             |
| 85Rb (KED)  | 20.142 ppb            | 0.5 %             |
| 88Sr (KED)  | 19.955 ppb            | 0.7 %             |
| 89Y (KED)   | 102.504 %             |                   |
| 107Ag (KED) | 20.078 ppb            | 0.6 %             |
| 114Cd (KED) | 20.225 ppb            | 1.2 %             |
| 115In (KED) | 100.211 %             |                   |
| 133Cs (KED) | 20.687 ppb            | 1.8 %             |
| 138Ba (KED) | 19.775 ppb            | 3.0 %             |
| 139La (KED) | 19.436 ppb            | 0.3 %             |
| 140Ce (KED) | 19.244 ppb            | 1.2 %             |
| 141Pr (KED) | 19.461 ppb            | 2.3 %             |
| 142Nd (KED) | 19.874 ppb            | 1.6 %             |
| 152Sm (KED) | 19.921 ppb            | 2.1 %             |
| 153Eu (KED) | 19.858 ppb            | 3.1 %             |
| 158Gd (KED) | 19.858 ppb            | 3.4 %             |
| 159Tb (KED) | 101.475 %             |                   |
| 164Dy (KED) | 19.970 ppb            | 1.1 %             |
| 166Er (KED) | 19.836 ppb            | 3.8 %             |
| 169Tm (KED) | 20.205 ppb            | 3.8 %             |
| 174Yb (KED) | 19.803 ppb            | 1.7 %             |
| 175Lu (KED) | 19.630 ppb            | 1.6 %             |
| 205Tl (KED) | 19.255 ppb            | 0.6 %             |
| 208Pb (KED) | 19.131 ppb            | 1.0 %             |
| 209Bi (KED) | 101.131 %             |                   |
| 232Th (KED) | 19.752 ppb            | 1.2 %             |
| 238U (KED)  | 19.842 ppb            | 1.3 %             |

| Category   | Concentration average | Intensity average | Intensity RSD |
|------------|-----------------------|-------------------|---------------|
| 6Li (KED)  | 101.128 %             | 2,988 cps         | 5.0 %         |
| 9Be (KED)  | 19.558 ppb            | 3,234 cps         | 3.3 %         |
| 11B (KED)  | 18.943 ppb            | 2,386 cps         | 3.3 %         |
| 24Mg (KED) | 19.480 ppb            | 11,930 cps        | 1.1 %         |
| 27Al (KED) | 19.982 ppb            | 3,102 cps         | 2.6 %         |

| Category    | Concentration average | Intensity average | Intensity RSD |
|-------------|-----------------------|-------------------|---------------|
| 45Sc (KED)  | 102.786 %             | 55,530 cps        | 1.7 %         |
| 51V (KED)   | 19.914 ppb            | 199,965 cps       | 0.9 %         |
| 52Cr (KED)  | 20.024 ppb            | 316,050 cps       | 0.8 %         |
| 55Mn (KED)  | 19.818 ppb            | 148,769 cps       | 1.2 %         |
| 56Fe (KED)  | 20.290 ppb            | 284,104 cps       | 1.0 %         |
| 58Ni (KED)  | 20.218 ppb            | 367,493 cps       | 1.1 %         |
| 59Co (KED)  | 20.061 ppb            | 596,554 cps       | 0.6 %         |
| 63Cu (KED)  | 20.472 ppb            | 466,242 cps       | 0.3 %         |
| 64Zn (KED)  | 20.206 ppb            | 119,713 cps       | 0.6 %         |
| 69Ga (KED)  | 20.024 ppb            | 144,172 cps       | 1.3 %         |
| 75As (KED)  | 19.998 ppb            | 33,129 cps        | 1.3 %         |
| 80Se (KED)  | 19.482 ppb            | 10,809 cps        | 3.3 %         |
| 85Rb (KED)  | 20.142 ppb            | 126,494 cps       | 0.5 %         |
| 88Sr (KED)  | 19.955 ppb            | 176,435 cps       | 0.6 %         |
| 89Y (KED)   | 102.504 %             | 477,741 cps       | 0.3 %         |
| 107Ag (KED) | 20.078 ppb            | 1,166,924 cps     | 0.9 %         |
| 114Cd (KED) | 20.225 ppb            | 415,605 cps       | 0.9 %         |
| 115In (KED) | 100.211 %             | 831,595 cps       | 0.4 %         |
| 133Cs (KED) | 20.687 ppb            | 624,802 cps       | 1.5 %         |
| 138Ba (KED) | 19.775 ppb            | 849,569 cps       | 1.6 %         |
| 139La (KED) | 19.436 ppb            | 1,838,562 cps     | 1.4 %         |
| 140Ce (KED) | 19.244 ppb            | 2,425,592 cps     | 1.5 %         |
| 141Pr (KED) | 19.461 ppb            | 2,480,044 cps     | 0.6 %         |
| 142Nd (KED) | 19.874 ppb            | 1,018,835 cps     | 1.6 %         |
| 152Sm (KED) | 19.921 ppb            | 890,001 cps       | 0.4 %         |
| 153Eu (KED) | 19.858 ppb            | 1,793,243 cps     | 1.4 %         |
| 158Gd (KED) | 19.858 ppb            | 1,217,022 cps     | 2.2 %         |
| 159Tb (KED) | 101.475 %             | 4,373,823 cps     | 1.7 %         |
| 164Dy (KED) | 19.970 ppb            | 1,345,229 cps     | 1.2 %         |
| 166Er (KED) | 19.836 ppb            | 1,569,721 cps     | 2.6 %         |
| 169Tm (KED) | 20.205 ppb            | 5,258,236 cps     | 2.4 %         |
| 174Yb (KED) | 19.803 ppb            | 1,850,280 cps     | 0.2 %         |
| 175Lu (KED) | 19.630 ppb            | 3,056,301 cps     | 1.8 %         |
| 205Tl (KED) | 19.255 ppb            | 3,556,344 cps     | 1.8 %         |
| 208Pb (KED) | 19.131 ppb            | 2,541,484 cps     | 1.1 %         |
| 209Bi (KED) | 101.131 %             | 3,569,672 cps     | 1.2 %         |
| 232Th (KED) | 19.752 ppb            | 5,312,405 cps     | 1.1 %         |
| 238U (KED)  | 19.842 ppb            | 5,923,704 cps     | 1.1 %         |

## Sample Summary

Instrument ID: iCAP Q

Analysis index: 5

Analysis name: 50+20

Analysis started at: 11/4/2021 2:58:31 PM

User name: WINDOWS-UPCI4ER\Administrator

| Category    | Concentration average | Concentration RSD |
|-------------|-----------------------|-------------------|
| 6Li (KED)   | 100.414 %             |                   |
| 9Be (KED)   | 48.989 ppb            | 6.2 %             |
| 11B (KED)   | 46.763 ppb            | 1.2 %             |
| 24Mg (KED)  | 48.026 ppb            | 4.4 %             |
| 27Al (KED)  | 49.889 ppb            | 2.4 %             |
| 45Sc (KED)  | 101.520 %             |                   |
| 51V (KED)   | 49.844 ppb            | 1.7 %             |
| 52Cr (KED)  | 49.804 ppb            | 1.1 %             |
| 55Mn (KED)  | 50.265 ppb            | 1.3 %             |
| 56Fe (KED)  | 50.383 ppb            | 1.1 %             |
| 58Ni (KED)  | 50.760 ppb            | 1.3 %             |
| 59Co (KED)  | 49.838 ppb            | 1.0 %             |
| 63Cu (KED)  | 51.119 ppb            | 1.9 %             |
| 64Zn (KED)  | 50.559 ppb            | 1.2 %             |
| 69Ga (KED)  | 50.179 ppb            | 0.5 %             |
| 75As (KED)  | 50.937 ppb            | 0.8 %             |
| 80Se (KED)  | 50.484 ppb            | 4.5 %             |
| 85Rb (KED)  | 50.472 ppb            | 2.0 %             |
| 88Sr (KED)  | 49.910 ppb            | 4.2 %             |
| 89Y (KED)   | 101.341 %             |                   |
| 107Ag (KED) | 48.173 ppb            | 0.9 %             |
| 114Cd (KED) | 49.345 ppb            | 0.2 %             |
| 115In (KED) | 102.109 %             |                   |
| 133Cs (KED) | 51.061 ppb            | 1.9 %             |
| 138Ba (KED) | 48.708 ppb            | 2.0 %             |
| 139La (KED) | 49.164 ppb            | 0.4 %             |
| 140Ce (KED) | 49.505 ppb            | 2.1 %             |
| 141Pr (KED) | 48.876 ppb            | 1.8 %             |
| 142Nd (KED) | 47.304 ppb            | 2.0 %             |
| 152Sm (KED) | 48.374 ppb            | 2.3 %             |
| 153Eu (KED) | 49.692 ppb            | 2.2 %             |
| 158Gd (KED) | 47.894 ppb            | 1.4 %             |
| 159Tb (KED) | 103.497 %             |                   |
| 164Dy (KED) | 47.562 ppb            | 0.9 %             |
| 166Er (KED) | 48.318 ppb            | 3.2 %             |
| 169Tm (KED) | 49.730 ppb            | 1.8 %             |
| 174Yb (KED) | 49.206 ppb            | 1.5 %             |
| 175Lu (KED) | 49.051 ppb            | 0.7 %             |
| 205Tl (KED) | 49.218 ppb            | 1.4 %             |
| 208Pb (KED) | 49.371 ppb            | 1.0 %             |
| 209Bi (KED) | 101.098 %             |                   |
| 232Th (KED) | 49.577 ppb            | 1.3 %             |
| 238U (KED)  | 50.220 ppb            | 1.4 %             |

| Category   | Concentration average | Intensity average | Intensity RSD |
|------------|-----------------------|-------------------|---------------|
| 6Li (KED)  | 100.414 %             | 2,967 cps         | 3.3 %         |
| 9Be (KED)  | 48.989 ppb            | 8,036 cps         | 3.5 %         |
| 11B (KED)  | 46.763 ppb            | 4,621 cps         | 2.7 %         |
| 24Mg (KED) | 48.026 ppb            | 28,937 cps        | 1.2 %         |
| 27Al (KED) | 49.889 ppb            | 7,484 cps         | 2.4 %         |

| Category    | Concentration average | Intensity average | Intensity RSD |
|-------------|-----------------------|-------------------|---------------|
| 45Sc (KED)  | 101.520 %             | 54,846 cps        | 1.3 %         |
| 51V (KED)   | 49.844 ppb            | 494,398 cps       | 0.8 %         |
| 52Cr (KED)  | 49.804 ppb            | 776,391 cps       | 1.2 %         |
| 55Mn (KED)  | 50.265 ppb            | 372,603 cps       | 1.8 %         |
| 56Fe (KED)  | 50.383 ppb            | 693,604 cps       | 0.4 %         |
| 58Ni (KED)  | 50.760 ppb            | 910,924 cps       | 0.4 %         |
| 59Co (KED)  | 49.838 ppb            | 1,464,023 cps     | 0.5 %         |
| 63Cu (KED)  | 51.119 ppb            | 1,150,250 cps     | 3.0 %         |
| 64Zn (KED)  | 50.559 ppb            | 290,544 cps       | 2.6 %         |
| 69Ga (KED)  | 50.179 ppb            | 357,024 cps       | 1.2 %         |
| 75As (KED)  | 50.937 ppb            | 83,403 cps        | 0.9 %         |
| 80Se (KED)  | 50.484 ppb            | 25,494 cps        | 2.8 %         |
| 85Rb (KED)  | 50.472 ppb            | 313,179 cps       | 0.6 %         |
| 88Sr (KED)  | 49.910 ppb            | 435,907 cps       | 2.7 %         |
| 89Y (KED)   | 101.341 %             | 472,320 cps       | 1.7 %         |
| 107Ag (KED) | 48.173 ppb            | 2,852,585 cps     | 0.6 %         |
| 114Cd (KED) | 49.345 ppb            | 1,033,195 cps     | 1.3 %         |
| 115In (KED) | 102.109 %             | 847,344 cps       | 1.1 %         |
| 133Cs (KED) | 51.061 ppb            | 1,571,219 cps     | 0.8 %         |
| 138Ba (KED) | 48.708 ppb            | 2,132,881 cps     | 2.7 %         |
| 139La (KED) | 49.164 ppb            | 4,743,341 cps     | 0.7 %         |
| 140Ce (KED) | 49.505 ppb            | 6,363,293 cps     | 1.3 %         |
| 141Pr (KED) | 48.876 ppb            | 6,353,818 cps     | 1.1 %         |
| 142Nd (KED) | 47.304 ppb            | 2,473,282 cps     | 1.4 %         |
| 152Sm (KED) | 48.374 ppb            | 2,204,570 cps     | 1.7 %         |
| 153Eu (KED) | 49.692 ppb            | 4,577,689 cps     | 1.3 %         |
| 158Gd (KED) | 47.894 ppb            | 2,994,583 cps     | 1.2 %         |
| 159Tb (KED) | 103.497 %             | 4,460,982 cps     | 0.9 %         |
| 164Dy (KED) | 47.562 ppb            | 3,267,762 cps     | 0.3 %         |
| 166Er (KED) | 48.318 ppb            | 3,900,239 cps     | 2.6 %         |
| 169Tm (KED) | 49.730 ppb            | 13,206,509 cps    | 2.6 %         |
| 174Yb (KED) | 49.206 ppb            | 4,690,512 cps     | 2.4 %         |
| 175Lu (KED) | 49.051 ppb            | 7,761,985 cps     | 1.5 %         |
| 205Tl (KED) | 49.218 ppb            | 9,087,201 cps     | 1.6 %         |
| 208Pb (KED) | 49.371 ppb            | 6,550,101 cps     | 1.4 %         |
| 209Bi (KED) | 101.098 %             | 3,568,503 cps     | 0.4 %         |
| 232Th (KED) | 49.577 ppb            | 13,329,745 cps    | 0.9 %         |
| 238U (KED)  | 50.220 ppb            | 14,988,719 cps    | 1.1 %         |

## Sample Summary

Instrument ID: iCAP Q

Analysis index: 6

Analysis name: 100+20

Analysis started at: 11/4/2021 3:01:35 PM

User name: WINDOWS-UPCI4ER\Administrator

| Category    | Concentration average | Concentration RSD |
|-------------|-----------------------|-------------------|
| 6Li (KED)   | 99.436 %              |                   |
| 9Be (KED)   | 100.594 ppb           | 2.1 %             |
| 11B (KED)   | 101.830 ppb           | 2.9 %             |
| 24Mg (KED)  | 101.091 ppb           | 3.7 %             |
| 27Al (KED)  | 100.059 ppb           | 2.9 %             |
| 45Sc (KED)  | 103.811 %             |                   |
| 51V (KED)   | 100.095 ppb           | 1.3 %             |
| 52Cr (KED)  | 100.093 ppb           | 0.8 %             |
| 55Mn (KED)  | 99.904 ppb            | 2.1 %             |
| 56Fe (KED)  | 99.751 ppb            | 1.1 %             |
| 58Ni (KED)  | 99.576 ppb            | 0.7 %             |
| 59Co (KED)  | 100.069 ppb           | 1.4 %             |
| 63Cu (KED)  | 99.346 ppb            | 0.8 %             |
| 64Zn (KED)  | 99.679 ppb            | 0.8 %             |
| 69Ga (KED)  | 99.906 ppb            | 0.6 %             |
| 75As (KED)  | 99.532 ppb            | 1.5 %             |
| 80Se (KED)  | 99.862 ppb            | 1.1 %             |
| 85Rb (KED)  | 99.736 ppb            | 1.6 %             |
| 88Sr (KED)  | 100.054 ppb           | 0.6 %             |
| 89Y (KED)   | 103.839 %             |                   |
| 107Ag (KED) | 100.898 ppb           | 1.9 %             |
| 114Cd (KED) | 100.282 ppb           | 1.7 %             |
| 115In (KED) | 102.767 %             |                   |
| 133Cs (KED) | 99.332 ppb            | 0.7 %             |
| 138Ba (KED) | 100.691 ppb           | 1.2 %             |
| 139La (KED) | 100.531 ppb           | 0.4 %             |
| 140Ce (KED) | 100.399 ppb           | 1.9 %             |
| 141Pr (KED) | 100.670 ppb           | 1.1 %             |
| 142Nd (KED) | 101.373 ppb           | 2.0 %             |
| 152Sm (KED) | 100.829 ppb           | 0.8 %             |
| 153Eu (KED) | 100.183 ppb           | 2.0 %             |
| 158Gd (KED) | 101.081 ppb           | 3.0 %             |
| 159Tb (KED) | 102.871 %             |                   |
| 164Dy (KED) | 101.225 ppb           | 1.3 %             |
| 166Er (KED) | 100.874 ppb           | 2.5 %             |
| 169Tm (KED) | 100.094 ppb           | 1.6 %             |
| 174Yb (KED) | 100.436 ppb           | 1.3 %             |
| 175Lu (KED) | 100.548 ppb           | 1.5 %             |
| 205Tl (KED) | 100.540 ppb           | 1.8 %             |
| 208Pb (KED) | 100.488 ppb           | 0.9 %             |
| 209Bi (KED) | 99.764 %              |                   |
| 232Th (KED) | 100.261 ppb           | 0.8 %             |
| 238U (KED)  | 99.922 ppb            | 3.2 %             |

| Category   | Concentration average | Intensity average | Intensity RSD |
|------------|-----------------------|-------------------|---------------|
| 6Li (KED)  | 99.436 %              | 2,938 cps         | 3.3 %         |
| 9Be (KED)  | 100.594 ppb           | 16,352 cps        | 1.3 %         |
| 11B (KED)  | 101.830 ppb           | 8,980 cps         | 2.1 %         |
| 24Mg (KED) | 101.091 ppb           | 60,113 cps        | 1.3 %         |
| 27Al (KED) | 100.059 ppb           | 15,239 cps        | 3.2 %         |

| Category    | Concentration average | Intensity average | Intensity RSD |
|-------------|-----------------------|-------------------|---------------|
| 45Sc (KED)  | 103.811 %             | 56,084 cps        | 0.4 %         |
| 51V (KED)   | 100.095 ppb           | 1,015,329 cps     | 0.9 %         |
| 52Cr (KED)  | 100.093 ppb           | 1,595,544 cps     | 0.7 %         |
| 55Mn (KED)  | 99.904 ppb            | 757,175 cps       | 1.8 %         |
| 56Fe (KED)  | 99.751 ppb            | 1,402,083 cps     | 0.7 %         |
| 58Ni (KED)  | 99.576 ppb            | 1,827,131 cps     | 0.8 %         |
| 59Co (KED)  | 100.069 ppb           | 3,006,059 cps     | 1.1 %         |
| 63Cu (KED)  | 99.346 ppb            | 2,289,809 cps     | 0.9 %         |
| 64Zn (KED)  | 99.679 ppb            | 583,150 cps       | 0.5 %         |
| 69Ga (KED)  | 99.906 ppb            | 728,313 cps       | 0.9 %         |
| 75As (KED)  | 99.532 ppb            | 166,992 cps       | 1.5 %         |
| 80Se (KED)  | 99.862 ppb            | 50,318 cps        | 0.6 %         |
| 85Rb (KED)  | 99.736 ppb            | 634,150 cps       | 1.3 %         |
| 88Sr (KED)  | 100.054 ppb           | 895,663 cps       | 0.6 %         |
| 89Y (KED)   | 103.839 %             | 483,963 cps       | 0.4 %         |
| 107Ag (KED) | 100.898 ppb           | 6,013,310 cps     | 1.5 %         |
| 114Cd (KED) | 100.282 ppb           | 2,113,127 cps     | 1.4 %         |
| 115In (KED) | 102.767 %             | 852,811 cps       | 0.4 %         |
| 133Cs (KED) | 99.332 ppb            | 3,076,677 cps     | 0.7 %         |
| 138Ba (KED) | 100.691 ppb           | 4,380,415 cps     | 1.6 %         |
| 139La (KED) | 100.531 ppb           | 9,640,892 cps     | 1.3 %         |
| 140Ce (KED) | 100.399 ppb           | 12,826,887 cps    | 1.1 %         |
| 141Pr (KED) | 100.670 ppb           | 13,008,230 cps    | 0.9 %         |
| 142Nd (KED) | 101.373 ppb           | 5,268,124 cps     | 1.3 %         |
| 152Sm (KED) | 100.829 ppb           | 4,567,498 cps     | 0.2 %         |
| 153Eu (KED) | 100.183 ppb           | 9,173,079 cps     | 1.0 %         |
| 158Gd (KED) | 101.081 ppb           | 6,280,965 cps     | 2.1 %         |
| 159Tb (KED) | 102.871 %             | 4,433,986 cps     | 1.0 %         |
| 164Dy (KED) | 101.225 ppb           | 6,912,550 cps     | 1.0 %         |
| 166Er (KED) | 100.874 ppb           | 8,093,267 cps     | 2.1 %         |
| 169Tm (KED) | 100.094 ppb           | 26,416,978 cps    | 1.6 %         |
| 174Yb (KED) | 100.436 ppb           | 9,514,944 cps     | 1.4 %         |
| 175Lu (KED) | 100.548 ppb           | 15,796,311 cps    | 2.5 %         |
| 205Tl (KED) | 100.540 ppb           | 18,315,650 cps    | 1.0 %         |
| 208Pb (KED) | 100.488 ppb           | 13,151,392 cps    | 1.2 %         |
| 209Bi (KED) | 99.764 %              | 3,521,426 cps     | 0.9 %         |
| 232Th (KED) | 100.261 ppb           | 26,601,341 cps    | 0.4 %         |
| 238U (KED)  | 99.922 ppb            | 29,424,707 cps    | 2.3 %         |

## Sample Summary

Instrument ID: iCAP Q

Analysis index: 7

Analysis name: 315042603860464 jian

Analysis started at: 11/4/2021 3:04:44 PM

User name: WINDOWS-UPCI4ER\Administrator

| Category    | Concentration average | Concentration RSD |
|-------------|-----------------------|-------------------|
| 6Li (KED)   | 100.526 %             | 2.4 %             |
| 9Be (KED)   | 0.047 ppb             | 26.8 %            |
| 11B (KED)   | -5.813 ppb            | 13.4 %            |
| 24Mg (KED)  | 175.819 ppb           | 3.7 %             |
| 27Al (KED)  | 248.699 ppb           | 1.4 %             |
| 45Sc (KED)  | 100.064 %             | 0.7 %             |
| 51V (KED)   | 0.507 ppb             | 0.6 %             |
| 52Cr (KED)  | 0.839 ppb             | 2.0 %             |
| 55Mn (KED)  | 6.016 ppb             | 1.0 %             |
| 56Fe (KED)  | 273.265 ppb           | 1.0 %             |
| 58Ni (KED)  | 1.370 ppb             | 3.7 %             |
| 59Co (KED)  | 0.125 ppb             | 3.2 %             |
| 63Cu (KED)  | 5.344 ppb             | 0.2 %             |
| 64Zn (KED)  | 58.148 ppb            | 0.8 %             |
| 69Ga (KED)  | 1.244 ppb             | 2.0 %             |
| 75As (KED)  | 0.255 ppb             | 7.9 %             |
| 80Se (KED)  | 0.100 ppb             | 20.3 %            |
| 85Rb (KED)  | 1.432 ppb             | 1.9 %             |
| 88Sr (KED)  | 3.034 ppb             | 1.7 %             |
| 89Y (KED)   | 99.874 %              | 0.7 %             |
| 107Ag (KED) | 0.109 ppb             | 14.3 %            |
| 114Cd (KED) | 0.019 ppb             | 6.5 %             |
| 115In (KED) | 97.761 %              | 0.7 %             |
| 133Cs (KED) | 0.063 ppb             | 6.7 %             |
| 138Ba (KED) | 3.729 ppb             | 1.2 %             |
| 139La (KED) | 0.201 ppb             | 1.3 %             |
| 140Ce (KED) | 0.419 ppb             | 1.0 %             |
| 141Pr (KED) | 0.052 ppb             | 2.2 %             |
| 142Nd (KED) | 0.266 ppb             | 1.8 %             |
| 152Sm (KED) | 0.042 ppb             | 1.9 %             |
| 153Eu (KED) | 0.010 ppb             | 19.5 %            |
| 158Gd (KED) | 0.037 ppb             | 3.0 %             |
| 159Tb (KED) | 102.434 %             | 1.7 %             |
| 164Dy (KED) | 0.027 ppb             | 9.3 %             |
| 166Er (KED) | 0.014 ppb             | 21.9 %            |
| 169Tm (KED) | 0.004 ppb             | 48.8 %            |
| 174Yb (KED) | 0.014 ppb             | 21.1 %            |
| 175Lu (KED) | -0.013 ppb            | 35.9 %            |
| 205Tl (KED) | 0.012 ppb             | 15.2 %            |
| 208Pb (KED) | 0.599 ppb             | 3.8 %             |
| 209Bi (KED) | 96.246 %              | 1.4 %             |
| 232Th (KED) | 0.238 ppb             | 56.5 %            |
| 238U (KED)  | 0.029 ppb             | 10.9 %            |

| Category   | Concentration average | Intensity average | Intensity RSD |
|------------|-----------------------|-------------------|---------------|
| 6Li (KED)  | 100.526 %             | 2,970 cps         | 2.4 %         |
| 9Be (KED)  | 0.047 ppb             | 9 cps             | 21.7 %        |
| 11B (KED)  | -5.813 ppb            | 372 cps           | 16.3 %        |
| 24Mg (KED) | 175.819 ppb           | 105,572 cps       | 1.7 %         |
| 27Al (KED) | 248.699 ppb           | 36,351 cps        | 2.0 %         |

# Comprehensive

11/4/2021 4:56:04 PM

| Category    | Concentration average | Intensity average | Intensity RSD |
|-------------|-----------------------|-------------------|---------------|
| 45Sc (KED)  | 100.064 %             | 54,059 cps        | 0.7 %         |
| 51V (KED)   | 0.507 ppb             | 4,962 cps         | 0.9 %         |
| 52Cr (KED)  | 0.839 ppb             | 12,981 cps        | 2.5 %         |
| 55Mn (KED)  | 6.016 ppb             | 44,012 cps        | 0.3 %         |
| 56Fe (KED)  | 273.265 ppb           | 3,698,442 cps     | 0.5 %         |
| 58Ni (KED)  | 1.370 ppb             | 24,580 cps        | 3.7 %         |
| 59Co (KED)  | 0.125 ppb             | 3,643 cps         | 3.9 %         |
| 63Cu (KED)  | 5.344 ppb             | 118,980 cps       | 0.7 %         |
| 64Zn (KED)  | 58.148 ppb            | 328,737 cps       | 1.1 %         |
| 69Ga (KED)  | 1.244 ppb             | 8,806 cps         | 2.2 %         |
| 75As (KED)  | 0.255 ppb             | 422 cps           | 7.9 %         |
| 80Se (KED)  | 0.100 ppb             | 1,400 cps         | 0.2 %         |
| 85Rb (KED)  | 1.432 ppb             | 8,840 cps         | 2.0 %         |
| 88Sr (KED)  | 3.034 ppb             | 26,238 cps        | 1.0 %         |
| 89Y (KED)   | 99.874 %              | 465,481 cps       | 0.7 %         |
| 107Ag (KED) | 0.109 ppb             | 6,172 cps         | 14.4 %        |
| 114Cd (KED) | 0.019 ppb             | 414 cps           | 5.7 %         |
| 115In (KED) | 97.761 %              | 811,265 cps       | 0.7 %         |
| 133Cs (KED) | 0.063 ppb             | 1,862 cps         | 6.8 %         |
| 138Ba (KED) | 3.729 ppb             | 162,978 cps       | 0.5 %         |
| 139La (KED) | 0.201 ppb             | 19,220 cps        | 2.1 %         |
| 140Ce (KED) | 0.419 ppb             | 53,680 cps        | 1.2 %         |
| 141Pr (KED) | 0.052 ppb             | 6,674 cps         | 3.5 %         |
| 142Nd (KED) | 0.266 ppb             | 13,832 cps        | 1.1 %         |
| 152Sm (KED) | 0.042 ppb             | 1,903 cps         | 0.9 %         |
| 153Eu (KED) | 0.010 ppb             | 923 cps           | 20.9 %        |
| 158Gd (KED) | 0.037 ppb             | 2,285 cps         | 4.6 %         |
| 159Tb (KED) | 102.434 %             | 4,415,136 cps     | 1.7 %         |
| 164Dy (KED) | 0.027 ppb             | 1,881 cps         | 9.9 %         |
| 166Er (KED) | 0.014 ppb             | 1,452 cps         | 18.8 %        |
| 169Tm (KED) | 0.004 ppb             | 1,195 cps         | 50.0 %        |
| 174Yb (KED) | 0.014 ppb             | 1,370 cps         | 22.4 %        |
| 175Lu (KED) | -0.013 ppb            | 16,475 cps        | 6.0 %         |
| 205Tl (KED) | 0.012 ppb             | 2,075 cps         | 15.8 %        |
| 208Pb (KED) | 0.599 ppb             | 79,667 cps        | 2.1 %         |
| 209Bi (KED) | 96.246 %              | 3,397,231 cps     | 1.4 %         |
| 232Th (KED) | 0.238 ppb             | 61,093 cps        | 56.8 %        |
| 238U (KED)  | 0.029 ppb             | 8,292 cps         | 11.1 %        |

## Sample Summary

Instrument ID: iCAP Q

Analysis index: 8

Analysis name: 315047603860522 jian

Analysis started at: 11/4/2021 3:07:51 PM

User name: WINDOWS-UPCI4ER\Administrator

| Category    | Concentration average | Concentration RSD |
|-------------|-----------------------|-------------------|
| 6Li (KED)   | 102.294 %             | 4.4 %             |
| 9Be (KED)   | 0.040 ppb             | 60.4 %            |
| 11B (KED)   | -7.244 ppb            | 6.7 %             |
| 24Mg (KED)  | 193.712 ppb           | 3.8 %             |
| 27Al (KED)  | 316.707 ppb           | 2.0 %             |
| 45Sc (KED)  | 100.826 %             | 1.9 %             |
| 51V (KED)   | 0.621 ppb             | 4.7 %             |
| 52Cr (KED)  | 0.918 ppb             | 1.8 %             |
| 55Mn (KED)  | 7.149 ppb             | 3.0 %             |
| 56Fe (KED)  | 333.102 ppb           | 1.8 %             |
| 58Ni (KED)  | 1.549 ppb             | 2.5 %             |
| 59Co (KED)  | 0.144 ppb             | 1.9 %             |
| 63Cu (KED)  | 2.499 ppb             | 1.8 %             |
| 64Zn (KED)  | 62.210 ppb            | 0.4 %             |
| 69Ga (KED)  | 1.228 ppb             | 2.8 %             |
| 75As (KED)  | 0.397 ppb             | 8.0 %             |
| 80Se (KED)  | 0.024 ppb             | 160.8 %           |
| 85Rb (KED)  | 1.107 ppb             | 3.4 %             |
| 88Sr (KED)  | 2.734 ppb             | 3.3 %             |
| 89Y (KED)   | 100.215 %             | 0.6 %             |
| 107Ag (KED) | 0.025 ppb             | 7.2 %             |
| 114Cd (KED) | 0.020 ppb             | 5.4 %             |
| 115In (KED) | 97.238 %              | 2.0 %             |
| 133Cs (KED) | 0.068 ppb             | 3.0 %             |
| 138Ba (KED) | 3.753 ppb             | 2.8 %             |
| 139La (KED) | 0.261 ppb             | 1.6 %             |
| 140Ce (KED) | 0.557 ppb             | 1.9 %             |
| 141Pr (KED) | 0.063 ppb             | 4.9 %             |
| 142Nd (KED) | 0.356 ppb             | 2.2 %             |
| 152Sm (KED) | 0.052 ppb             | 6.3 %             |
| 153Eu (KED) | 0.010 ppb             | 2.6 %             |
| 158Gd (KED) | 0.045 ppb             | 6.6 %             |
| 159Tb (KED) | 100.427 %             | 1.7 %             |
| 164Dy (KED) | 0.033 ppb             | 2.4 %             |
| 166Er (KED) | 0.016 ppb             | 2.9 %             |
| 169Tm (KED) | 0.002 ppb             | 8.7 %             |
| 174Yb (KED) | 0.014 ppb             | 7.7 %             |
| 175Lu (KED) | -0.018 ppb            | 9.5 %             |
| 205Tl (KED) | 0.008 ppb             | 4.6 %             |
| 208Pb (KED) | 0.465 ppb             | 1.6 %             |
| 209Bi (KED) | 95.539 %              | 0.9 %             |
| 232Th (KED) | 0.109 ppb             | 2.0 %             |
| 238U (KED)  | 0.017 ppb             | 3.0 %             |

| Category   | Concentration average | Intensity average | Intensity RSD |
|------------|-----------------------|-------------------|---------------|
| 6Li (KED)  | 102.294 %             | 3,023 cps         | 4.4 %         |
| 9Be (KED)  | 0.040 ppb             | 8 cps             | 49.5 %        |
| 11B (KED)  | -7.244 ppb            | 260 cps           | 11.0 %        |
| 24Mg (KED) | 193.712 ppb           | 118,277 cps       | 1.0 %         |
| 27Al (KED) | 316.707 ppb           | 46,600 cps        | 0.5 %         |

# Comprehensive

11/4/2021 4:56:04 PM

| Category    | Concentration average | Intensity average | Intensity RSD |
|-------------|-----------------------|-------------------|---------------|
| 45Sc (KED)  | 100.826 %             | 54,471 cps        | 1.9 %         |
| 51V (KED)   | 0.621 ppb             | 6,117 cps         | 2.9 %         |
| 52Cr (KED)  | 0.918 ppb             | 14,304 cps        | 0.3 %         |
| 55Mn (KED)  | 7.149 ppb             | 52,669 cps        | 1.1 %         |
| 56Fe (KED)  | 333.102 ppb           | 4,541,532 cps     | 1.3 %         |
| 58Ni (KED)  | 1.549 ppb             | 27,941 cps        | 1.0 %         |
| 59Co (KED)  | 0.144 ppb             | 4,227 cps         | 1.7 %         |
| 63Cu (KED)  | 2.499 ppb             | 56,122 cps        | 1.3 %         |
| 64Zn (KED)  | 62.210 ppb            | 352,633 cps       | 0.3 %         |
| 69Ga (KED)  | 1.228 ppb             | 8,724 cps         | 2.9 %         |
| 75As (KED)  | 0.397 ppb             | 654 cps           | 8.5 %         |
| 80Se (KED)  | 0.024 ppb             | 1,369 cps         | 2.0 %         |
| 85Rb (KED)  | 1.107 ppb             | 6,879 cps         | 2.7 %         |
| 88Sr (KED)  | 2.734 ppb             | 23,737 cps        | 2.6 %         |
| 89Y (KED)   | 100.215 %             | 467,071 cps       | 0.6 %         |
| 107Ag (KED) | 0.025 ppb             | 1,399 cps         | 7.4 %         |
| 114Cd (KED) | 0.020 ppb             | 429 cps           | 5.9 %         |
| 115In (KED) | 97.238 %              | 806,929 cps       | 2.0 %         |
| 133Cs (KED) | 0.068 ppb             | 2,017 cps         | 3.6 %         |
| 138Ba (KED) | 3.753 ppb             | 160,808 cps       | 2.1 %         |
| 139La (KED) | 0.261 ppb             | 24,477 cps        | 0.2 %         |
| 140Ce (KED) | 0.557 ppb             | 69,757 cps        | 0.3 %         |
| 141Pr (KED) | 0.063 ppb             | 8,015 cps         | 4.1 %         |
| 142Nd (KED) | 0.356 ppb             | 18,096 cps        | 1.8 %         |
| 152Sm (KED) | 0.052 ppb             | 2,290 cps         | 7.9 %         |
| 153Eu (KED) | 0.010 ppb             | 867 cps           | 3.7 %         |
| 158Gd (KED) | 0.045 ppb             | 2,757 cps         | 4.9 %         |
| 159Tb (KED) | 100.427 %             | 4,328,629 cps     | 1.7 %         |
| 164Dy (KED) | 0.033 ppb             | 2,200 cps         | 2.8 %         |
| 166Er (KED) | 0.016 ppb             | 1,536 cps         | 0.7 %         |
| 169Tm (KED) | 0.002 ppb             | 642 cps           | 7.0 %         |
| 174Yb (KED) | 0.014 ppb             | 1,311 cps         | 9.2 %         |
| 175Lu (KED) | -0.018 ppb            | 15,411 cps        | 3.3 %         |
| 205Tl (KED) | 0.008 ppb             | 1,382 cps         | 5.3 %         |
| 208Pb (KED) | 0.465 ppb             | 62,275 cps        | 2.3 %         |
| 209Bi (KED) | 95.539 %              | 3,372,289 cps     | 0.9 %         |
| 232Th (KED) | 0.109 ppb             | 27,859 cps        | 2.8 %         |
| 238U (KED)  | 0.017 ppb             | 4,762 cps         | 2.3 %         |

## Sample Summary

Instrument ID: iCAP Q

Analysis index: 9

Analysis name: 315047603860451

Analysis started at: 11/4/2021 3:10:55 PM

User name: WINDOWS-UPCI4ER\Administrator

| Category    | Concentration average | Concentration RSD |
|-------------|-----------------------|-------------------|
| 6Li (KED)   | 104.777 %             | 2.3 %             |
| 9Be (KED)   | 0.026 ppb             | 90.3 %            |
| 11B (KED)   | -7.410 ppb            | 2.7 %             |
| 24Mg (KED)  | 139.686 ppb           | 3.0 %             |
| 27Al (KED)  | 178.936 ppb           | 0.6 %             |
| 45Sc (KED)  | 100.299 %             | 1.2 %             |
| 51V (KED)   | 0.367 ppb             | 2.8 %             |
| 52Cr (KED)  | 0.689 ppb             | 2.5 %             |
| 55Mn (KED)  | 5.695 ppb             | 0.9 %             |
| 56Fe (KED)  | 192.351 ppb           | 1.5 %             |
| 58Ni (KED)  | 1.013 ppb             | 2.7 %             |
| 59Co (KED)  | 0.096 ppb             | 4.1 %             |
| 63Cu (KED)  | 3.288 ppb             | 1.2 %             |
| 64Zn (KED)  | 63.098 ppb            | 0.7 %             |
| 69Ga (KED)  | 0.794 ppb             | 4.1 %             |
| 75As (KED)  | 0.220 ppb             | 12.9 %            |
| 80Se (KED)  | 0.069 ppb             | 155.8 %           |
| 85Rb (KED)  | 0.705 ppb             | 6.1 %             |
| 88Sr (KED)  | 2.272 ppb             | 2.6 %             |
| 89Y (KED)   | 97.879 %              | 0.8 %             |
| 107Ag (KED) | 0.013 ppb             | 6.7 %             |
| 114Cd (KED) | 0.016 ppb             | 6.6 %             |
| 115In (KED) | 96.580 %              | 1.4 %             |
| 133Cs (KED) | 0.041 ppb             | 4.9 %             |
| 138Ba (KED) | 2.446 ppb             | 1.4 %             |
| 139La (KED) | 0.162 ppb             | 2.2 %             |
| 140Ce (KED) | 0.344 ppb             | 2.1 %             |
| 141Pr (KED) | 0.040 ppb             | 2.7 %             |
| 142Nd (KED) | 0.218 ppb             | 2.0 %             |
| 152Sm (KED) | 0.030 ppb             | 2.7 %             |
| 153Eu (KED) | 0.005 ppb             | 8.7 %             |
| 158Gd (KED) | 0.027 ppb             | 1.0 %             |
| 159Tb (KED) | 99.409 %              | 0.3 %             |
| 164Dy (KED) | 0.019 ppb             | 7.3 %             |
| 166Er (KED) | 0.009 ppb             | 1.8 %             |
| 169Tm (KED) | 0.001 ppb             | 6.8 %             |
| 174Yb (KED) | 0.007 ppb             | 12.4 %            |
| 175Lu (KED) | -0.019 ppb            | 16.0 %            |
| 205Tl (KED) | 0.006 ppb             | 1.9 %             |
| 208Pb (KED) | 0.431 ppb             | 2.5 %             |
| 209Bi (KED) | 93.313 %              | 0.9 %             |
| 232Th (KED) | 0.064 ppb             | 3.0 %             |
| 238U (KED)  | 0.012 ppb             | 6.7 %             |

| Category   | Concentration average | Intensity average | Intensity RSD |
|------------|-----------------------|-------------------|---------------|
| 6Li (KED)  | 104.777 %             | 3,096 cps         | 2.3 %         |
| 9Be (KED)  | 0.026 ppb             | 6 cps             | 69.3 %        |
| 11B (KED)  | -7.410 ppb            | 253 cps           | 4.7 %         |
| 24Mg (KED) | 139.686 ppb           | 87,474 cps        | 1.1 %         |
| 27Al (KED) | 178.936 ppb           | 26,245 cps        | 1.8 %         |

# Comprehensive

11/4/2021 4:56:04 PM

| Category    | Concentration average | Intensity average | Intensity RSD |
|-------------|-----------------------|-------------------|---------------|
| 45Sc (KED)  | 100.299 %             | 54,186 cps        | 1.2 %         |
| 51V (KED)   | 0.367 ppb             | 3,606 cps         | 3.6 %         |
| 52Cr (KED)  | 0.689 ppb             | 10,706 cps        | 1.3 %         |
| 55Mn (KED)  | 5.695 ppb             | 41,765 cps        | 0.6 %         |
| 56Fe (KED)  | 192.351 ppb           | 2,609,907 cps     | 0.4 %         |
| 58Ni (KED)  | 1.013 ppb             | 18,306 cps        | 1.8 %         |
| 59Co (KED)  | 0.096 ppb             | 2,826 cps         | 3.2 %         |
| 63Cu (KED)  | 3.288 ppb             | 71,952 cps        | 0.4 %         |
| 64Zn (KED)  | 63.098 ppb            | 349,276 cps       | 0.5 %         |
| 69Ga (KED)  | 0.794 ppb             | 5,542 cps         | 4.4 %         |
| 75As (KED)  | 0.220 ppb             | 359 cps           | 12.3 %        |
| 80Se (KED)  | 0.069 ppb             | 1,358 cps         | 4.4 %         |
| 85Rb (KED)  | 0.705 ppb             | 4,307 cps         | 5.7 %         |
| 88Sr (KED)  | 2.272 ppb             | 19,288 cps        | 2.1 %         |
| 89Y (KED)   | 97.879 %              | 456,185 cps       | 0.8 %         |
| 107Ag (KED) | 0.013 ppb             | 752 cps           | 7.7 %         |
| 114Cd (KED) | 0.016 ppb             | 341 cps           | 5.6 %         |
| 115In (KED) | 96.580 %              | 801,466 cps       | 1.4 %         |
| 133Cs (KED) | 0.041 ppb             | 1,212 cps         | 6.1 %         |
| 138Ba (KED) | 2.446 ppb             | 104,270 cps       | 1.1 %         |
| 139La (KED) | 0.162 ppb             | 15,001 cps        | 1.8 %         |
| 140Ce (KED) | 0.344 ppb             | 42,839 cps        | 1.8 %         |
| 141Pr (KED) | 0.040 ppb             | 5,021 cps         | 2.8 %         |
| 142Nd (KED) | 0.218 ppb             | 11,019 cps        | 1.7 %         |
| 152Sm (KED) | 0.030 ppb             | 1,327 cps         | 2.4 %         |
| 153Eu (KED) | 0.005 ppb             | 487 cps           | 8.3 %         |
| 158Gd (KED) | 0.027 ppb             | 1,612 cps         | 0.9 %         |
| 159Tb (KED) | 99.409 %              | 4,284,780 cps     | 0.3 %         |
| 164Dy (KED) | 0.019 ppb             | 1,239 cps         | 7.0 %         |
| 166Er (KED) | 0.009 ppb             | 1,021 cps         | 1.5 %         |
| 169Tm (KED) | 0.001 ppb             | 367 cps           | 6.6 %         |
| 174Yb (KED) | 0.007 ppb             | 700 cps           | 12.3 %        |
| 175Lu (KED) | -0.019 ppb            | 15,046 cps        | 3.2 %         |
| 205Tl (KED) | 0.006 ppb             | 961 cps           | 1.4 %         |
| 208Pb (KED) | 0.431 ppb             | 56,723 cps        | 1.4 %         |
| 209Bi (KED) | 93.313 %              | 3,293,713 cps     | 0.9 %         |
| 232Th (KED) | 0.064 ppb             | 15,916 cps        | 2.7 %         |
| 238U (KED)  | 0.012 ppb             | 3,272 cps         | 5.7 %         |

## Sample Summary

Instrument ID: iCAP Q

Analysis index: 10

Analysis name: 315047603860477 jian

Analysis started at: 11/4/2021 3:14:06 PM

User name: WINDOWS-UPCI4ER\Administrator

| Category    | Concentration average | Concentration RSD |
|-------------|-----------------------|-------------------|
| 6Li (KED)   | 107.259 %             | 5.2 %             |
| 9Be (KED)   | 0.012 ppb             | 8.3 %             |
| 11B (KED)   | -7.942 ppb            | 5.3 %             |
| 24Mg (KED)  | 172.261 ppb           | 5.6 %             |
| 27Al (KED)  | 290.369 ppb           | 1.7 %             |
| 45Sc (KED)  | 101.326 %             | 0.1 %             |
| 51V (KED)   | 0.581 ppb             | 2.5 %             |
| 52Cr (KED)  | 1.021 ppb             | 2.3 %             |
| 55Mn (KED)  | 6.247 ppb             | 0.9 %             |
| 56Fe (KED)  | 329.242 ppb           | 1.7 %             |
| 58Ni (KED)  | 1.446 ppb             | 2.6 %             |
| 59Co (KED)  | 0.137 ppb             | 5.1 %             |
| 63Cu (KED)  | 2.637 ppb             | 0.8 %             |
| 64Zn (KED)  | 60.744 ppb            | 0.7 %             |
| 69Ga (KED)  | 1.009 ppb             | 2.0 %             |
| 75As (KED)  | 0.257 ppb             | 7.3 %             |
| 80Se (KED)  | 0.073 ppb             | 116.1 %           |
| 85Rb (KED)  | 0.892 ppb             | 3.6 %             |
| 88Sr (KED)  | 2.664 ppb             | 0.6 %             |
| 89Y (KED)   | 99.349 %              | 0.3 %             |
| 107Ag (KED) | 0.016 ppb             | 1.3 %             |
| 114Cd (KED) | 0.015 ppb             | 13.8 %            |
| 115In (KED) | 96.070 %              | 1.0 %             |
| 133Cs (KED) | 0.058 ppb             | 1.3 %             |
| 138Ba (KED) | 2.989 ppb             | 2.9 %             |
| 139La (KED) | 0.227 ppb             | 3.9 %             |
| 140Ce (KED) | 0.479 ppb             | 2.7 %             |
| 141Pr (KED) | 0.054 ppb             | 1.1 %             |
| 142Nd (KED) | 0.300 ppb             | 0.1 %             |
| 152Sm (KED) | 0.043 ppb             | 5.7 %             |
| 153Eu (KED) | 0.008 ppb             | 13.2 %            |
| 158Gd (KED) | 0.037 ppb             | 1.9 %             |
| 159Tb (KED) | 98.855 %              | 2.1 %             |
| 164Dy (KED) | 0.029 ppb             | 0.2 %             |
| 166Er (KED) | 0.014 ppb             | 6.4 %             |
| 169Tm (KED) | 0.002 ppb             | 11.5 %            |
| 174Yb (KED) | 0.013 ppb             | 5.8 %             |
| 175Lu (KED) | -0.021 ppb            | 7.7 %             |
| 205Tl (KED) | 0.006 ppb             | 1.8 %             |
| 208Pb (KED) | 0.415 ppb             | 2.6 %             |
| 209Bi (KED) | 93.617 %              | 1.6 %             |
| 232Th (KED) | 0.070 ppb             | 2.9 %             |
| 238U (KED)  | 0.013 ppb             | 8.1 %             |

| Category   | Concentration average | Intensity average | Intensity RSD |
|------------|-----------------------|-------------------|---------------|
| 6Li (KED)  | 107.259 %             | 3,169 cps         | 5.2 %         |
| 9Be (KED)  | 0.012 ppb             | 3 cps             | 0.0 %         |
| 11B (KED)  | -7.942 ppb            | 213 cps           | 16.9 %        |
| 24Mg (KED) | 172.261 ppb           | 110,218 cps       | 0.7 %         |
| 27Al (KED) | 290.369 ppb           | 42,956 cps        | 1.7 %         |

# Comprehensive

11/4/2021 4:56:04 PM

| Category    | Concentration average | Intensity average | Intensity RSD |
|-------------|-----------------------|-------------------|---------------|
| 45Sc (KED)  | 101.326 %             | 54,741 cps        | 0.1 %         |
| 51V (KED)   | 0.581 ppb             | 5,755 cps         | 2.5 %         |
| 52Cr (KED)  | 1.021 ppb             | 15,984 cps        | 2.2 %         |
| 55Mn (KED)  | 6.247 ppb             | 46,279 cps        | 1.0 %         |
| 56Fe (KED)  | 329.242 ppb           | 4,511,983 cps     | 1.7 %         |
| 58Ni (KED)  | 1.446 ppb             | 26,253 cps        | 2.6 %         |
| 59Co (KED)  | 0.137 ppb             | 4,032 cps         | 5.0 %         |
| 63Cu (KED)  | 2.637 ppb             | 58,687 cps        | 0.9 %         |
| 64Zn (KED)  | 60.744 ppb            | 341,440 cps       | 0.5 %         |
| 69Ga (KED)  | 1.009 ppb             | 7,121 cps         | 2.3 %         |
| 75As (KED)  | 0.257 ppb             | 423 cps           | 6.9 %         |
| 80Se (KED)  | 0.073 ppb             | 1,380 cps         | 3.0 %         |
| 85Rb (KED)  | 0.892 ppb             | 5,512 cps         | 3.2 %         |
| 88Sr (KED)  | 2.664 ppb             | 22,931 cps        | 0.9 %         |
| 89Y (KED)   | 99.349 %              | 463,034 cps       | 0.3 %         |
| 107Ag (KED) | 0.016 ppb             | 917 cps           | 1.7 %         |
| 114Cd (KED) | 0.015 ppb             | 330 cps           | 12.9 %        |
| 115In (KED) | 96.070 %              | 797,233 cps       | 1.0 %         |
| 133Cs (KED) | 0.058 ppb             | 1,699 cps         | 1.1 %         |
| 138Ba (KED) | 2.989 ppb             | 126,332 cps       | 1.0 %         |
| 139La (KED) | 0.227 ppb             | 20,909 cps        | 1.8 %         |
| 140Ce (KED) | 0.479 ppb             | 59,128 cps        | 0.7 %         |
| 141Pr (KED) | 0.054 ppb             | 6,756 cps         | 1.1 %         |
| 142Nd (KED) | 0.300 ppb             | 15,039 cps        | 2.0 %         |
| 152Sm (KED) | 0.043 ppb             | 1,857 cps         | 7.9 %         |
| 153Eu (KED) | 0.008 ppb             | 688 cps           | 12.2 %        |
| 158Gd (KED) | 0.037 ppb             | 2,204 cps         | 0.7 %         |
| 159Tb (KED) | 98.855 %              | 4,260,879 cps     | 2.1 %         |
| 164Dy (KED) | 0.029 ppb             | 1,893 cps         | 2.2 %         |
| 166Er (KED) | 0.014 ppb             | 1,365 cps         | 4.7 %         |
| 169Tm (KED) | 0.002 ppb             | 503 cps           | 9.3 %         |
| 174Yb (KED) | 0.013 ppb             | 1,158 cps         | 7.7 %         |
| 175Lu (KED) | -0.021 ppb            | 14,774 cps        | 1.7 %         |
| 205Tl (KED) | 0.006 ppb             | 1,078 cps         | 0.7 %         |
| 208Pb (KED) | 0.415 ppb             | 54,872 cps        | 0.9 %         |
| 209Bi (KED) | 93.617 %              | 3,304,422 cps     | 1.6 %         |
| 232Th (KED) | 0.070 ppb             | 17,480 cps        | 3.3 %         |
| 238U (KED)  | 0.013 ppb             | 3,653 cps         | 6.5 %         |

## Sample Summary

Instrument ID: iCAP Q

Analysis index: 11

Analysis name: 315047603860529 jian

Analysis started at: 11/4/2021 3:17:15 PM

User name: WINDOWS-UPCI4ER\Administrator

| Category    | Concentration average | Concentration RSD |
|-------------|-----------------------|-------------------|
| 6Li (KED)   | 109.328 %             | 3.3 %             |
| 9Be (KED)   | 0.050 ppb             | 112.3 %           |
| 11B (KED)   | -4.998 ppb            | 2.5 %             |
| 24Mg (KED)  | 235.535 ppb           | 1.9 %             |
| 27Al (KED)  | 452.863 ppb           | 1.5 %             |
| 45Sc (KED)  | 101.859 %             | 1.8 %             |
| 51V (KED)   | 0.859 ppb             | 2.3 %             |
| 52Cr (KED)  | 1.211 ppb             | 0.9 %             |
| 55Mn (KED)  | 9.241 ppb             | 1.0 %             |
| 56Fe (KED)  | 442.597 ppb           | 1.4 %             |
| 58Ni (KED)  | 1.909 ppb             | 1.9 %             |
| 59Co (KED)  | 0.215 ppb             | 1.4 %             |
| 63Cu (KED)  | 2.808 ppb             | 0.6 %             |
| 64Zn (KED)  | 61.869 ppb            | 1.0 %             |
| 69Ga (KED)  | 1.499 ppb             | 0.4 %             |
| 75As (KED)  | 0.422 ppb             | 4.9 %             |
| 80Se (KED)  | 0.131 ppb             | 21.8 %            |
| 85Rb (KED)  | 1.399 ppb             | 1.6 %             |
| 88Sr (KED)  | 4.626 ppb             | 0.7 %             |
| 89Y (KED)   | 99.247 %              | 0.8 %             |
| 107Ag (KED) | 0.015 ppb             | 4.6 %             |
| 114Cd (KED) | 0.016 ppb             | 16.1 %            |
| 115In (KED) | 94.922 %              | 0.7 %             |
| 133Cs (KED) | 0.086 ppb             | 5.7 %             |
| 138Ba (KED) | 4.502 ppb             | 1.7 %             |
| 139La (KED) | 0.477 ppb             | 3.4 %             |
| 140Ce (KED) | 0.993 ppb             | 4.2 %             |
| 141Pr (KED) | 0.115 ppb             | 3.6 %             |
| 142Nd (KED) | 0.601 ppb             | 2.4 %             |
| 152Sm (KED) | 0.084 ppb             | 4.7 %             |
| 153Eu (KED) | 0.013 ppb             | 3.6 %             |
| 158Gd (KED) | 0.072 ppb             | 7.8 %             |
| 159Tb (KED) | 97.279 %              | 2.3 %             |
| 164Dy (KED) | 0.052 ppb             | 1.2 %             |
| 166Er (KED) | 0.024 ppb             | 7.2 %             |
| 169Tm (KED) | 0.004 ppb             | 6.9 %             |
| 174Yb (KED) | 0.024 ppb             | 6.8 %             |
| 175Lu (KED) | -0.017 ppb            | 18.4 %            |
| 205Tl (KED) | 0.007 ppb             | 5.7 %             |
| 208Pb (KED) | 0.525 ppb             | 0.6 %             |
| 209Bi (KED) | 91.271 %              | 1.4 %             |
| 232Th (KED) | 0.215 ppb             | 3.2 %             |
| 238U (KED)  | 0.023 ppb             | 3.5 %             |

| Category   | Concentration average | Intensity average | Intensity RSD |
|------------|-----------------------|-------------------|---------------|
| 6Li (KED)  | 109.328 %             | 3,230 cps         | 3.3 %         |
| 9Be (KED)  | 0.050 ppb             | 10 cps            | 100.0 %       |
| 11B (KED)  | -4.998 ppb            | 477 cps           | 3.0 %         |
| 24Mg (KED) | 235.535 ppb           | 153,761 cps       | 1.5 %         |
| 27Al (KED) | 452.863 ppb           | 67,275 cps        | 1.0 %         |

# Comprehensive

11/4/2021 4:56:04 PM

| Category    | Concentration average | Intensity average | Intensity RSD |
|-------------|-----------------------|-------------------|---------------|
| 45Sc (KED)  | 101.859 %             | 55,029 cps        | 1.8 %         |
| 51V (KED)   | 0.859 ppb             | 8,556 cps         | 3.9 %         |
| 52Cr (KED)  | 1.211 ppb             | 19,026 cps        | 1.1 %         |
| 55Mn (KED)  | 9.241 ppb             | 68,779 cps        | 1.7 %         |
| 56Fe (KED)  | 442.597 ppb           | 6,095,847 cps     | 1.3 %         |
| 58Ni (KED)  | 1.909 ppb             | 34,714 cps        | 0.5 %         |
| 59Co (KED)  | 0.215 ppb             | 6,382 cps         | 3.2 %         |
| 63Cu (KED)  | 2.808 ppb             | 62,384 cps        | 0.5 %         |
| 64Zn (KED)  | 61.869 ppb            | 347,327 cps       | 0.6 %         |
| 69Ga (KED)  | 1.499 ppb             | 10,530 cps        | 0.4 %         |
| 75As (KED)  | 0.422 ppb             | 687 cps           | 4.1 %         |
| 80Se (KED)  | 0.131 ppb             | 1,406 cps         | 0.1 %         |
| 85Rb (KED)  | 1.399 ppb             | 8,583 cps         | 2.4 %         |
| 88Sr (KED)  | 4.626 ppb             | 39,693 cps        | 0.4 %         |
| 89Y (KED)   | 99.247 %              | 462,561 cps       | 0.8 %         |
| 107Ag (KED) | 0.015 ppb             | 829 cps           | 3.8 %         |
| 114Cd (KED) | 0.016 ppb             | 348 cps           | 14.7 %        |
| 115In (KED) | 94.922 %              | 787,705 cps       | 0.7 %         |
| 133Cs (KED) | 0.086 ppb             | 2,478 cps         | 5.0 %         |
| 138Ba (KED) | 4.502 ppb             | 186,572 cps       | 1.5 %         |
| 139La (KED) | 0.477 ppb             | 43,259 cps        | 1.8 %         |
| 140Ce (KED) | 0.993 ppb             | 120,226 cps       | 1.9 %         |
| 141Pr (KED) | 0.115 ppb             | 14,109 cps        | 1.2 %         |
| 142Nd (KED) | 0.601 ppb             | 29,603 cps        | 0.7 %         |
| 152Sm (KED) | 0.084 ppb             | 3,618 cps         | 2.4 %         |
| 153Eu (KED) | 0.013 ppb             | 1,101 cps         | 1.4 %         |
| 158Gd (KED) | 0.072 ppb             | 4,233 cps         | 5.6 %         |
| 159Tb (KED) | 97.279 %              | 4,192,965 cps     | 2.3 %         |
| 164Dy (KED) | 0.052 ppb             | 3,382 cps         | 3.1 %         |
| 166Er (KED) | 0.024 ppb             | 2,156 cps         | 5.6 %         |
| 169Tm (KED) | 0.004 ppb             | 921 cps           | 8.1 %         |
| 174Yb (KED) | 0.024 ppb             | 2,119 cps         | 4.7 %         |
| 175Lu (KED) | -0.017 ppb            | 15,037 cps        | 3.5 %         |
| 205Tl (KED) | 0.007 ppb             | 1,262 cps         | 5.0 %         |
| 208Pb (KED) | 0.525 ppb             | 66,749 cps        | 1.6 %         |
| 209Bi (KED) | 91.271 %              | 3,221,615 cps     | 1.4 %         |
| 232Th (KED) | 0.215 ppb             | 52,320 cps        | 2.0 %         |
| 238U (KED)  | 0.023 ppb             | 6,371 cps         | 2.3 %         |

## Sample Summary

Instrument ID: iCAP Q

Analysis index: 12

Analysis name: 315042603860503 jian

Analysis started at: 11/4/2021 3:20:20 PM

User name: WINDOWS-UPCI4ER\Administrator

| Category    | Concentration average | Concentration RSD |
|-------------|-----------------------|-------------------|
| 6Li (KED)   | 106.018 %             | 3.1 %             |
| 9Be (KED)   | 0.012 ppb             | 155.4 %           |
| 11B (KED)   | -7.274 ppb            | 6.4 %             |
| 24Mg (KED)  | 284.815 ppb           | 3.6 %             |
| 27Al (KED)  | 436.854 ppb           | 0.3 %             |
| 45Sc (KED)  | 102.875 %             | 1.0 %             |
| 51V (KED)   | 0.840 ppb             | 2.0 %             |
| 52Cr (KED)  | 1.387 ppb             | 2.6 %             |
| 55Mn (KED)  | 10.487 ppb            | 1.8 %             |
| 56Fe (KED)  | 436.256 ppb           | 1.6 %             |
| 58Ni (KED)  | 1.896 ppb             | 2.1 %             |
| 59Co (KED)  | 0.198 ppb             | 1.9 %             |
| 63Cu (KED)  | 2.087 ppb             | 1.6 %             |
| 64Zn (KED)  | 58.728 ppb            | 1.9 %             |
| 69Ga (KED)  | 1.690 ppb             | 2.2 %             |
| 75As (KED)  | 0.401 ppb             | 3.8 %             |
| 80Se (KED)  | 0.015 ppb             | 1,667.6 %         |
| 85Rb (KED)  | 1.233 ppb             | 2.6 %             |
| 88Sr (KED)  | 4.012 ppb             | 1.2 %             |
| 89Y (KED)   | 97.339 %              | 1.4 %             |
| 107Ag (KED) | 0.014 ppb             | 6.0 %             |
| 114Cd (KED) | 0.026 ppb             | 6.2 %             |
| 115In (KED) | 93.063 %              | 2.2 %             |
| 133Cs (KED) | 0.084 ppb             | 3.3 %             |
| 138Ba (KED) | 5.081 ppb             | 2.8 %             |
| 139La (KED) | 0.352 ppb             | 2.4 %             |
| 140Ce (KED) | 0.737 ppb             | 1.7 %             |
| 141Pr (KED) | 0.086 ppb             | 0.6 %             |
| 142Nd (KED) | 0.473 ppb             | 2.2 %             |
| 152Sm (KED) | 0.066 ppb             | 2.6 %             |
| 153Eu (KED) | 0.012 ppb             | 10.0 %            |
| 158Gd (KED) | 0.058 ppb             | 1.4 %             |
| 159Tb (KED) | 96.356 %              | 2.2 %             |
| 164Dy (KED) | 0.043 ppb             | 4.4 %             |
| 166Er (KED) | 0.021 ppb             | 2.1 %             |
| 169Tm (KED) | 0.003 ppb             | 1.7 %             |
| 174Yb (KED) | 0.019 ppb             | 5.7 %             |
| 175Lu (KED) | -0.017 ppb            | 22.6 %            |
| 205Tl (KED) | 0.007 ppb             | 7.6 %             |
| 208Pb (KED) | 0.539 ppb             | 4.3 %             |
| 209Bi (KED) | 90.677 %              | 3.1 %             |
| 232Th (KED) | 0.101 ppb             | 1.9 %             |
| 238U (KED)  | 0.019 ppb             | 4.5 %             |

| Category   | Concentration average | Intensity average | Intensity RSD |
|------------|-----------------------|-------------------|---------------|
| 6Li (KED)  | 106.018 %             | 3,133 cps         | 3.1 %         |
| 9Be (KED)  | 0.012 ppb             | 3 cps             | 100.0 %       |
| 11B (KED)  | -7.274 ppb            | 268 cps           | 13.8 %        |
| 24Mg (KED) | 284.815 ppb           | 180,199 cps       | 0.5 %         |
| 27Al (KED) | 436.854 ppb           | 65,560 cps        | 1.2 %         |

# Comprehensive

11/4/2021 4:56:04 PM

| Category    | Concentration average | Intensity average | Intensity RSD |
|-------------|-----------------------|-------------------|---------------|
| 45Sc (KED)  | 102.875 %             | 55,578 cps        | 1.0 %         |
| 51V (KED)   | 0.840 ppb             | 8,446 cps         | 2.5 %         |
| 52Cr (KED)  | 1.387 ppb             | 21,997 cps        | 2.3 %         |
| 55Mn (KED)  | 10.487 ppb            | 78,833 cps        | 2.0 %         |
| 56Fe (KED)  | 436.256 ppb           | 6,069,635 cps     | 2.4 %         |
| 58Ni (KED)  | 1.896 ppb             | 34,843 cps        | 2.7 %         |
| 59Co (KED)  | 0.198 ppb             | 5,927 cps         | 2.6 %         |
| 63Cu (KED)  | 2.087 ppb             | 45,608 cps        | 1.3 %         |
| 64Zn (KED)  | 58.728 ppb            | 323,515 cps       | 1.4 %         |
| 69Ga (KED)  | 1.690 ppb             | 11,634 cps        | 1.9 %         |
| 75As (KED)  | 0.401 ppb             | 641 cps           | 3.7 %         |
| 80Se (KED)  | 0.015 ppb             | 1,325 cps         | 7.4 %         |
| 85Rb (KED)  | 1.233 ppb             | 7,431 cps         | 1.3 %         |
| 88Sr (KED)  | 4.012 ppb             | 33,775 cps        | 1.3 %         |
| 89Y (KED)   | 97.339 %              | 453,666 cps       | 1.4 %         |
| 107Ag (KED) | 0.014 ppb             | 757 cps           | 3.8 %         |
| 114Cd (KED) | 0.026 ppb             | 522 cps           | 3.8 %         |
| 115In (KED) | 93.063 %              | 772,276 cps       | 2.2 %         |
| 133Cs (KED) | 0.084 ppb             | 2,379 cps         | 5.5 %         |
| 138Ba (KED) | 5.081 ppb             | 208,326 cps       | 0.6 %         |
| 139La (KED) | 0.352 ppb             | 31,593 cps        | 0.9 %         |
| 140Ce (KED) | 0.737 ppb             | 88,566 cps        | 2.1 %         |
| 141Pr (KED) | 0.086 ppb             | 10,427 cps        | 2.0 %         |
| 142Nd (KED) | 0.473 ppb             | 23,081 cps        | 0.8 %         |
| 152Sm (KED) | 0.066 ppb             | 2,810 cps         | 4.2 %         |
| 153Eu (KED) | 0.012 ppb             | 1,073 cps         | 10.8 %        |
| 158Gd (KED) | 0.058 ppb             | 3,402 cps         | 2.5 %         |
| 159Tb (KED) | 96.356 %              | 4,153,166 cps     | 2.2 %         |
| 164Dy (KED) | 0.043 ppb             | 2,737 cps         | 2.4 %         |
| 166Er (KED) | 0.021 ppb             | 1,853 cps         | 3.5 %         |
| 169Tm (KED) | 0.003 ppb             | 776 cps           | 2.4 %         |
| 174Yb (KED) | 0.019 ppb             | 1,677 cps         | 5.7 %         |
| 175Lu (KED) | -0.017 ppb            | 14,861 cps        | 4.0 %         |
| 205Tl (KED) | 0.007 ppb             | 1,172 cps         | 7.0 %         |
| 208Pb (KED) | 0.539 ppb             | 67,891 cps        | 2.7 %         |
| 209Bi (KED) | 90.677 %              | 3,200,665 cps     | 3.1 %         |
| 232Th (KED) | 0.101 ppb             | 24,467 cps        | 1.7 %         |
| 238U (KED)  | 0.019 ppb             | 5,256 cps         | 1.4 %         |

## Sample Summary

Instrument ID: iCAP Q

Analysis index: 13

Analysis name: 305047603860518 jian

Analysis started at: 11/4/2021 3:23:25 PM

User name: WINDOWS-UPCI4ER\Administrator

| Category    | Concentration average | Concentration RSD |
|-------------|-----------------------|-------------------|
| 6Li (KED)   | 110.795 %             | 3.3 %             |
| 9Be (KED)   | -0.001 ppb            | 2,184.6 %         |
| 11B (KED)   | -7.195 ppb            | 4.3 %             |
| 24Mg (KED)  | 187.209 ppb           | 2.1 %             |
| 27Al (KED)  | 295.108 ppb           | 1.0 %             |
| 45Sc (KED)  | 104.233 %             | 0.7 %             |
| 51V (KED)   | 0.488 ppb             | 1.2 %             |
| 52Cr (KED)  | 0.713 ppb             | 3.3 %             |
| 55Mn (KED)  | 5.906 ppb             | 1.0 %             |
| 56Fe (KED)  | 249.939 ppb           | 0.9 %             |
| 58Ni (KED)  | 1.207 ppb             | 2.8 %             |
| 59Co (KED)  | 0.143 ppb             | 3.1 %             |
| 63Cu (KED)  | 2.331 ppb             | 1.4 %             |
| 64Zn (KED)  | 62.817 ppb            | 1.1 %             |
| 69Ga (KED)  | 1.077 ppb             | 4.7 %             |
| 75As (KED)  | 0.257 ppb             | 9.4 %             |
| 80Se (KED)  | 0.200 ppb             | 72.1 %            |
| 85Rb (KED)  | 1.904 ppb             | 1.1 %             |
| 88Sr (KED)  | 3.176 ppb             | 3.8 %             |
| 89Y (KED)   | 99.506 %              | 2.3 %             |
| 107Ag (KED) | 0.015 ppb             | 2.6 %             |
| 114Cd (KED) | 0.016 ppb             | 11.0 %            |
| 115In (KED) | 95.841 %              | 0.5 %             |
| 133Cs (KED) | 0.049 ppb             | 1.4 %             |
| 138Ba (KED) | 3.320 ppb             | 2.3 %             |
| 139La (KED) | 0.224 ppb             | 1.2 %             |
| 140Ce (KED) | 0.471 ppb             | 1.6 %             |
| 141Pr (KED) | 0.055 ppb             | 0.3 %             |
| 142Nd (KED) | 0.300 ppb             | 1.4 %             |
| 152Sm (KED) | 0.043 ppb             | 1.7 %             |
| 153Eu (KED) | 0.008 ppb             | 8.0 %             |
| 158Gd (KED) | 0.038 ppb             | 2.3 %             |
| 159Tb (KED) | 98.346 %              | 1.6 %             |
| 164Dy (KED) | 0.027 ppb             | 6.2 %             |
| 166Er (KED) | 0.013 ppb             | 4.5 %             |
| 169Tm (KED) | 0.002 ppb             | 8.9 %             |
| 174Yb (KED) | 0.012 ppb             | 1.6 %             |
| 175Lu (KED) | -0.016 ppb            | 15.2 %            |
| 205Tl (KED) | 0.006 ppb             | 2.3 %             |
| 208Pb (KED) | 0.425 ppb             | 2.3 %             |
| 209Bi (KED) | 91.478 %              | 0.8 %             |
| 232Th (KED) | 0.068 ppb             | 2.1 %             |
| 238U (KED)  | 0.013 ppb             | 5.5 %             |

| Category   | Concentration average | Intensity average | Intensity RSD |
|------------|-----------------------|-------------------|---------------|
| 6Li (KED)  | 110.795 %             | 3,274 cps         | 3.3 %         |
| 9Be (KED)  | -0.001 ppb            | 1 cps             | 173.2 %       |
| 11B (KED)  | -7.195 ppb            | 288 cps           | 12.7 %        |
| 24Mg (KED) | 187.209 ppb           | 123,897 cps       | 1.7 %         |
| 27Al (KED) | 295.108 ppb           | 44,906 cps        | 0.9 %         |

# Comprehensive

11/4/2021 4:56:04 PM

| Category    | Concentration average | Intensity average | Intensity RSD |
|-------------|-----------------------|-------------------|---------------|
| 45Sc (KED)  | 104.233 %             | 56,311 cps        | 0.7 %         |
| 51V (KED)   | 0.488 ppb             | 4,970 cps         | 0.6 %         |
| 52Cr (KED)  | 0.713 ppb             | 11,502 cps        | 2.9 %         |
| 55Mn (KED)  | 5.906 ppb             | 45,012 cps        | 1.6 %         |
| 56Fe (KED)  | 249.939 ppb           | 3,523,942 cps     | 0.9 %         |
| 58Ni (KED)  | 1.207 ppb             | 22,593 cps        | 2.3 %         |
| 59Co (KED)  | 0.143 ppb             | 4,334 cps         | 3.4 %         |
| 63Cu (KED)  | 2.331 ppb             | 52,010 cps        | 2.1 %         |
| 64Zn (KED)  | 62.817 ppb            | 353,475 cps       | 1.4 %         |
| 69Ga (KED)  | 1.077 ppb             | 7,607 cps         | 4.1 %         |
| 75As (KED)  | 0.257 ppb             | 423 cps           | 7.2 %         |
| 80Se (KED)  | 0.200 ppb             | 1,441 cps         | 3.3 %         |
| 85Rb (KED)  | 1.904 ppb             | 11,684 cps        | 1.7 %         |
| 88Sr (KED)  | 3.176 ppb             | 27,342 cps        | 1.4 %         |
| 89Y (KED)   | 99.506 %              | 463,767 cps       | 2.3 %         |
| 107Ag (KED) | 0.015 ppb             | 844 cps           | 2.5 %         |
| 114Cd (KED) | 0.016 ppb             | 332 cps           | 10.5 %        |
| 115In (KED) | 95.841 %              | 795,330 cps       | 0.5 %         |
| 133Cs (KED) | 0.049 ppb             | 1,432 cps         | 1.7 %         |
| 138Ba (KED) | 3.320 ppb             | 139,501 cps       | 3.0 %         |
| 139La (KED) | 0.224 ppb             | 20,532 cps        | 0.6 %         |
| 140Ce (KED) | 0.471 ppb             | 57,789 cps        | 0.1 %         |
| 141Pr (KED) | 0.055 ppb             | 6,776 cps         | 1.3 %         |
| 142Nd (KED) | 0.300 ppb             | 14,967 cps        | 2.4 %         |
| 152Sm (KED) | 0.043 ppb             | 1,885 cps         | 1.9 %         |
| 153Eu (KED) | 0.008 ppb             | 742 cps           | 7.0 %         |
| 158Gd (KED) | 0.038 ppb             | 2,264 cps         | 0.8 %         |
| 159Tb (KED) | 98.346 %              | 4,238,951 cps     | 1.6 %         |
| 164Dy (KED) | 0.027 ppb             | 1,773 cps         | 7.7 %         |
| 166Er (KED) | 0.013 ppb             | 1,299 cps         | 3.1 %         |
| 169Tm (KED) | 0.002 ppb             | 452 cps           | 9.5 %         |
| 174Yb (KED) | 0.012 ppb             | 1,103 cps         | 3.2 %         |
| 175Lu (KED) | -0.016 ppb            | 15,354 cps        | 0.9 %         |
| 205Tl (KED) | 0.006 ppb             | 943 cps           | 2.5 %         |
| 208Pb (KED) | 0.425 ppb             | 54,845 cps        | 1.8 %         |
| 209Bi (KED) | 91.478 %              | 3,228,938 cps     | 0.8 %         |
| 232Th (KED) | 0.068 ppb             | 16,558 cps        | 2.7 %         |
| 238U (KED)  | 0.013 ppb             | 3,624 cps         | 5.3 %         |

## Sample Summary

Instrument ID: iCAP Q

Analysis index: 14

Analysis name: 315047603860510

Analysis started at: 11/4/2021 3:26:36 PM

User name: WINDOWS-UPCI4ER\Administrator

| Category    | Concentration average | Concentration RSD |
|-------------|-----------------------|-------------------|
| 6Li (KED)   | 57.274 %              | 5.6 %             |
| 9Be (KED)   | 0.030 ppb             | 125.6 %           |
| 11B (KED)   | -5.581 ppb            | 19.9 %            |
| 24Mg (KED)  | 301.027 ppb           | 5.7 %             |
| 27Al (KED)  | 479.455 ppb           | 1.6 %             |
| 45Sc (KED)  | 52.750 %              | 0.6 %             |
| 51V (KED)   | 0.929 ppb             | 0.7 %             |
| 52Cr (KED)  | 2.578 ppb             | 1.6 %             |
| 55Mn (KED)  | 13.953 ppb            | 0.8 %             |
| 56Fe (KED)  | 436.074 ppb           | 0.9 %             |
| 58Ni (KED)  | 1.995 ppb             | 0.8 %             |
| 59Co (KED)  | 0.271 ppb             | 2.5 %             |
| 63Cu (KED)  | 3.617 ppb             | 1.5 %             |
| 64Zn (KED)  | 136.063 ppb           | 0.2 %             |
| 69Ga (KED)  | 2.208 ppb             | 1.2 %             |
| 75As (KED)  | 0.616 ppb             | 9.4 %             |
| 80Se (KED)  | 3.626 ppb             | 9.1 %             |
| 85Rb (KED)  | 1.303 ppb             | 2.8 %             |
| 88Sr (KED)  | 5.347 ppb             | 2.0 %             |
| 89Y (KED)   | 49.414 %              | 1.0 %             |
| 107Ag (KED) | 0.021 ppb             | 6.9 %             |
| 114Cd (KED) | 0.072 ppb             | 3.3 %             |
| 115In (KED) | 48.105 %              | 1.4 %             |
| 133Cs (KED) | 0.089 ppb             | 0.9 %             |
| 138Ba (KED) | 6.934 ppb             | 1.7 %             |
| 139La (KED) | 0.469 ppb             | 1.6 %             |
| 140Ce (KED) | 0.971 ppb             | 0.7 %             |
| 141Pr (KED) | 0.113 ppb             | 3.8 %             |
| 142Nd (KED) | 0.595 ppb             | 2.2 %             |
| 152Sm (KED) | 0.081 ppb             | 9.0 %             |
| 153Eu (KED) | 0.015 ppb             | 7.5 %             |
| 158Gd (KED) | 0.076 ppb             | 3.0 %             |
| 159Tb (KED) | 46.812 %              | 0.4 %             |
| 164Dy (KED) | 0.049 ppb             | 4.7 %             |
| 166Er (KED) | 0.023 ppb             | 7.8 %             |
| 169Tm (KED) | 0.003 ppb             | 9.8 %             |
| 174Yb (KED) | 0.020 ppb             | 3.9 %             |
| 175Lu (KED) | -0.011 ppb            | 47.3 %            |
| 205Tl (KED) | 0.009 ppb             | 5.8 %             |
| 208Pb (KED) | 0.913 ppb             | 1.4 %             |
| 209Bi (KED) | 46.561 %              | 0.7 %             |
| 232Th (KED) | 0.128 ppb             | 1.2 %             |
| 238U (KED)  | 0.028 ppb             | 3.2 %             |

| Category   | Concentration average | Intensity average | Intensity RSD |
|------------|-----------------------|-------------------|---------------|
| 6Li (KED)  | 57.274 %              | 1,692 cps         | 5.6 %         |
| 9Be (KED)  | 0.030 ppb             | 3 cps             | 100.0 %       |
| 11B (KED)  | -5.581 ppb            | 222 cps           | 22.3 %        |
| 24Mg (KED) | 301.027 ppb           | 102,743 cps       | 0.2 %         |
| 27Al (KED) | 479.455 ppb           | 36,888 cps        | 1.6 %         |

# Comprehensive

11/4/2021 4:56:04 PM

| Category    | Concentration average | Intensity average | Intensity RSD |
|-------------|-----------------------|-------------------|---------------|
| 45Sc (KED)  | 52.750 %              | 28,498 cps        | 0.6 %         |
| 51V (KED)   | 0.929 ppb             | 4,791 cps         | 0.9 %         |
| 52Cr (KED)  | 2.578 ppb             | 20,926 cps        | 1.4 %         |
| 55Mn (KED)  | 13.953 ppb            | 53,771 cps        | 1.4 %         |
| 56Fe (KED)  | 436.074 ppb           | 3,110,840 cps     | 1.5 %         |
| 58Ni (KED)  | 1.995 ppb             | 18,785 cps        | 0.8 %         |
| 59Co (KED)  | 0.271 ppb             | 4,152 cps         | 3.0 %         |
| 63Cu (KED)  | 3.617 ppb             | 39,930 cps        | 2.1 %         |
| 64Zn (KED)  | 136.063 ppb           | 378,138 cps       | 1.0 %         |
| 69Ga (KED)  | 2.208 ppb             | 7,704 cps         | 2.2 %         |
| 75As (KED)  | 0.616 ppb             | 498 cps           | 10.2 %        |
| 80Se (KED)  | 3.626 ppb             | 1,515 cps         | 5.2 %         |
| 85Rb (KED)  | 1.303 ppb             | 3,985 cps         | 2.6 %         |
| 88Sr (KED)  | 5.347 ppb             | 22,834 cps        | 2.0 %         |
| 89Y (KED)   | 49.414 %              | 230,305 cps       | 1.0 %         |
| 107Ag (KED) | 0.021 ppb             | 602 cps           | 7.5 %         |
| 114Cd (KED) | 0.072 ppb             | 726 cps           | 1.9 %         |
| 115In (KED) | 48.105 %              | 399,199 cps       | 1.4 %         |
| 133Cs (KED) | 0.089 ppb             | 1,305 cps         | 1.3 %         |
| 138Ba (KED) | 6.934 ppb             | 137,920 cps       | 2.0 %         |
| 139La (KED) | 0.469 ppb             | 20,464 cps        | 1.9 %         |
| 140Ce (KED) | 0.971 ppb             | 56,641 cps        | 0.9 %         |
| 141Pr (KED) | 0.113 ppb             | 6,644 cps         | 3.4 %         |
| 142Nd (KED) | 0.595 ppb             | 14,102 cps        | 2.2 %         |
| 152Sm (KED) | 0.081 ppb             | 1,672 cps         | 9.4 %         |
| 153Eu (KED) | 0.015 ppb             | 641 cps           | 7.6 %         |
| 158Gd (KED) | 0.076 ppb             | 2,137 cps         | 3.3 %         |
| 159Tb (KED) | 46.812 %              | 2,017,716 cps     | 0.4 %         |
| 164Dy (KED) | 0.049 ppb             | 1,529 cps         | 5.0 %         |
| 166Er (KED) | 0.023 ppb             | 976 cps           | 6.8 %         |
| 169Tm (KED) | 0.003 ppb             | 393 cps           | 9.6 %         |
| 174Yb (KED) | 0.020 ppb             | 861 cps           | 3.6 %         |
| 175Lu (KED) | -0.011 ppb            | 7,708 cps         | 4.4 %         |
| 205Tl (KED) | 0.009 ppb             | 743 cps           | 5.5 %         |
| 208Pb (KED) | 0.913 ppb             | 57,703 cps        | 1.3 %         |
| 209Bi (KED) | 46.561 %              | 1,643,489 cps     | 0.7 %         |
| 232Th (KED) | 0.128 ppb             | 15,857 cps        | 1.6 %         |
| 238U (KED)  | 0.028 ppb             | 3,877 cps         | 3.4 %         |

## Sample Summary

Instrument ID: iCAP Q

Analysis index: 15

Analysis name: 315047603860447 jian

Analysis started at: 11/4/2021 3:29:43 PM

User name: WINDOWS-UPCI4ER\Administrator

| Category    | Concentration average | Concentration RSD |
|-------------|-----------------------|-------------------|
| 6Li (KED)   | 112.976 %             | 2.1 %             |
| 9Be (KED)   | 0.017 ppb             | 121.4 %           |
| 11B (KED)   | -8.282 ppb            | 6.2 %             |
| 24Mg (KED)  | 182.984 ppb           | 1.3 %             |
| 27Al (KED)  | 222.651 ppb           | 2.1 %             |
| 45Sc (KED)  | 106.200 %             | 1.7 %             |
| 51V (KED)   | 0.426 ppb             | 1.6 %             |
| 52Cr (KED)  | 1.619 ppb             | 2.1 %             |
| 55Mn (KED)  | 6.537 ppb             | 0.9 %             |
| 56Fe (KED)  | 228.514 ppb           | 2.0 %             |
| 58Ni (KED)  | 1.122 ppb             | 2.1 %             |
| 59Co (KED)  | 0.130 ppb             | 7.1 %             |
| 63Cu (KED)  | 2.325 ppb             | 0.9 %             |
| 64Zn (KED)  | 54.753 ppb            | 1.6 %             |
| 69Ga (KED)  | 1.068 ppb             | 3.1 %             |
| 75As (KED)  | 0.255 ppb             | 9.0 %             |
| 80Se (KED)  | 0.059 ppb             | 317.5 %           |
| 85Rb (KED)  | 0.989 ppb             | 2.1 %             |
| 88Sr (KED)  | 3.737 ppb             | 1.0 %             |
| 89Y (KED)   | 100.689 %             | 0.9 %             |
| 107Ag (KED) | 0.010 ppb             | 10.1 %            |
| 114Cd (KED) | 0.019 ppb             | 12.8 %            |
| 115In (KED) | 94.956 %              | 2.4 %             |
| 133Cs (KED) | 0.043 ppb             | 5.9 %             |
| 138Ba (KED) | 3.131 ppb             | 1.7 %             |
| 139La (KED) | 0.190 ppb             | 2.4 %             |
| 140Ce (KED) | 0.401 ppb             | 1.4 %             |
| 141Pr (KED) | 0.046 ppb             | 2.6 %             |
| 142Nd (KED) | 0.252 ppb             | 3.4 %             |
| 152Sm (KED) | 0.036 ppb             | 1.6 %             |
| 153Eu (KED) | 0.007 ppb             | 3.8 %             |
| 158Gd (KED) | 0.032 ppb             | 5.6 %             |
| 159Tb (KED) | 98.797 %              | 0.5 %             |
| 164Dy (KED) | 0.023 ppb             | 3.2 %             |
| 166Er (KED) | 0.011 ppb             | 5.7 %             |
| 169Tm (KED) | 0.002 ppb             | 10.1 %            |
| 174Yb (KED) | 0.010 ppb             | 3.0 %             |
| 175Lu (KED) | -0.021 ppb            | 14.6 %            |
| 205Tl (KED) | 0.004 ppb             | 2.2 %             |
| 208Pb (KED) | 0.380 ppb             | 1.9 %             |
| 209Bi (KED) | 92.280 %              | 1.9 %             |
| 232Th (KED) | 0.053 ppb             | 3.4 %             |
| 238U (KED)  | 0.014 ppb             | 4.7 %             |

| Category   | Concentration average | Intensity average | Intensity RSD |
|------------|-----------------------|-------------------|---------------|
| 6Li (KED)  | 112.976 %             | 3,338 cps         | 2.1 %         |
| 9Be (KED)  | 0.017 ppb             | 4 cps             | 86.6 %        |
| 11B (KED)  | -8.282 ppb            | 194 cps           | 24.9 %        |
| 24Mg (KED) | 182.984 ppb           | 123,520 cps       | 1.0 %         |
| 27Al (KED) | 222.651 ppb           | 34,541 cps        | 0.4 %         |

# Comprehensive

11/4/2021 4:56:04 PM

| Category    | Concentration average | Intensity average | Intensity RSD |
|-------------|-----------------------|-------------------|---------------|
| 45Sc (KED)  | 106.200 %             | 57,374 cps        | 1.7 %         |
| 51V (KED)   | 0.426 ppb             | 4,427 cps         | 1.6 %         |
| 52Cr (KED)  | 1.619 ppb             | 26,498 cps        | 0.9 %         |
| 55Mn (KED)  | 6.537 ppb             | 50,760 cps        | 2.4 %         |
| 56Fe (KED)  | 228.514 ppb           | 3,282,231 cps     | 0.6 %         |
| 58Ni (KED)  | 1.122 ppb             | 21,431 cps        | 0.4 %         |
| 59Co (KED)  | 0.130 ppb             | 4,026 cps         | 8.3 %         |
| 63Cu (KED)  | 2.325 ppb             | 52,504 cps        | 1.8 %         |
| 64Zn (KED)  | 54.753 ppb            | 312,289 cps       | 1.9 %         |
| 69Ga (KED)  | 1.068 ppb             | 7,637 cps         | 4.0 %         |
| 75As (KED)  | 0.255 ppb             | 426 cps           | 7.8 %         |
| 80Se (KED)  | 0.059 ppb             | 1,392 cps         | 6.7 %         |
| 85Rb (KED)  | 0.989 ppb             | 6,184 cps         | 2.8 %         |
| 88Sr (KED)  | 3.737 ppb             | 32,557 cps        | 0.2 %         |
| 89Y (KED)   | 100.689 %             | 469,279 cps       | 0.9 %         |
| 107Ag (KED) | 0.010 ppb             | 552 cps           | 8.2 %         |
| 114Cd (KED) | 0.019 ppb             | 392 cps           | 14.5 %        |
| 115In (KED) | 94.956 %              | 787,987 cps       | 2.4 %         |
| 133Cs (KED) | 0.043 ppb             | 1,239 cps         | 4.8 %         |
| 138Ba (KED) | 3.131 ppb             | 132,229 cps       | 1.4 %         |
| 139La (KED) | 0.190 ppb             | 17,516 cps        | 2.1 %         |
| 140Ce (KED) | 0.401 ppb             | 49,592 cps        | 1.2 %         |
| 141Pr (KED) | 0.046 ppb             | 5,680 cps         | 2.8 %         |
| 142Nd (KED) | 0.252 ppb             | 12,618 cps        | 3.0 %         |
| 152Sm (KED) | 0.036 ppb             | 1,581 cps         | 1.6 %         |
| 153Eu (KED) | 0.007 ppb             | 616 cps           | 3.8 %         |
| 158Gd (KED) | 0.032 ppb             | 1,899 cps         | 6.0 %         |
| 159Tb (KED) | 98.797 %              | 4,258,379 cps     | 0.5 %         |
| 164Dy (KED) | 0.023 ppb             | 1,551 cps         | 2.8 %         |
| 166Er (KED) | 0.011 ppb             | 1,185 cps         | 4.2 %         |
| 169Tm (KED) | 0.002 ppb             | 432 cps           | 9.5 %         |
| 174Yb (KED) | 0.010 ppb             | 957 cps           | 2.5 %         |
| 175Lu (KED) | -0.021 ppb            | 14,771 cps        | 3.2 %         |
| 205Tl (KED) | 0.004 ppb             | 759 cps           | 4.0 %         |
| 208Pb (KED) | 0.380 ppb             | 49,883 cps        | 0.3 %         |
| 209Bi (KED) | 92.280 %              | 3,257,262 cps     | 1.9 %         |
| 232Th (KED) | 0.053 ppb             | 13,135 cps        | 1.6 %         |
| 238U (KED)  | 0.014 ppb             | 3,804 cps         | 2.8 %         |

## Sample Summary

Instrument ID: iCAP Q

Analysis index: 16

Analysis name: 315047603860470jian

Analysis started at: 11/4/2021 3:32:46 PM

User name: WINDOWS-UPCI4ER\Administrator

| Category    | Concentration average | Concentration RSD |
|-------------|-----------------------|-------------------|
| 6Li (KED)   | 104.100 %             | 1.9 %             |
| 9Be (KED)   | 0.000 ppb             | 5,097.4 %         |
| 11B (KED)   | -8.119 ppb            | 3.9 %             |
| 24Mg (KED)  | 194.749 ppb           | 1.9 %             |
| 27Al (KED)  | 226.317 ppb           | 2.0 %             |
| 45Sc (KED)  | 103.045 %             | 0.9 %             |
| 51V (KED)   | 0.440 ppb             | 3.6 %             |
| 52Cr (KED)  | 1.626 ppb             | 0.3 %             |
| 55Mn (KED)  | 6.585 ppb             | 1.1 %             |
| 56Fe (KED)  | 230.593 ppb           | 0.3 %             |
| 58Ni (KED)  | 1.157 ppb             | 1.1 %             |
| 59Co (KED)  | 0.130 ppb             | 2.9 %             |
| 63Cu (KED)  | 2.299 ppb             | 2.4 %             |
| 64Zn (KED)  | 54.906 ppb            | 1.6 %             |
| 69Ga (KED)  | 1.097 ppb             | 2.2 %             |
| 75As (KED)  | 0.252 ppb             | 6.2 %             |
| 80Se (KED)  | 0.220 ppb             | 94.5 %            |
| 85Rb (KED)  | 0.975 ppb             | 2.9 %             |
| 88Sr (KED)  | 3.701 ppb             | 1.8 %             |
| 89Y (KED)   | 98.277 %              | 0.9 %             |
| 107Ag (KED) | 0.008 ppb             | 5.9 %             |
| 114Cd (KED) | 0.022 ppb             | 7.7 %             |
| 115In (KED) | 93.759 %              | 2.5 %             |
| 133Cs (KED) | 0.041 ppb             | 4.6 %             |
| 138Ba (KED) | 3.246 ppb             | 1.7 %             |
| 139La (KED) | 0.194 ppb             | 1.1 %             |
| 140Ce (KED) | 0.394 ppb             | 1.2 %             |
| 141Pr (KED) | 0.046 ppb             | 2.3 %             |
| 142Nd (KED) | 0.247 ppb             | 3.5 %             |
| 152Sm (KED) | 0.035 ppb             | 5.2 %             |
| 153Eu (KED) | 0.007 ppb             | 9.1 %             |
| 158Gd (KED) | 0.034 ppb             | 1.6 %             |
| 159Tb (KED) | 96.117 %              | 0.4 %             |
| 164Dy (KED) | 0.025 ppb             | 0.9 %             |
| 166Er (KED) | 0.011 ppb             | 9.7 %             |
| 169Tm (KED) | 0.002 ppb             | 9.7 %             |
| 174Yb (KED) | 0.010 ppb             | 9.7 %             |
| 175Lu (KED) | -0.024 ppb            | 17.7 %            |
| 205Tl (KED) | 0.005 ppb             | 11.5 %            |
| 208Pb (KED) | 0.379 ppb             | 1.1 %             |
| 209Bi (KED) | 90.345 %              | 1.2 %             |
| 232Th (KED) | 0.054 ppb             | 1.5 %             |
| 238U (KED)  | 0.014 ppb             | 4.4 %             |

| Category   | Concentration average | Intensity average | Intensity RSD |
|------------|-----------------------|-------------------|---------------|
| 6Li (KED)  | 104.100 %             | 3,076 cps         | 1.9 %         |
| 9Be (KED)  | 0.000 ppb             | 1 cps             | 173.2 %       |
| 11B (KED)  | -8.119 ppb            | 192 cps           | 12.2 %        |
| 24Mg (KED) | 194.749 ppb           | 121,112 cps       | 0.7 %         |
| 27Al (KED) | 226.317 ppb           | 34,071 cps        | 1.8 %         |

# Comprehensive

11/4/2021 4:56:04 PM

| Category    | Concentration average | Intensity average | Intensity RSD |
|-------------|-----------------------|-------------------|---------------|
| 45Sc (KED)  | 103.045 %             | 55,670 cps        | 0.9 %         |
| 51V (KED)   | 0.440 ppb             | 4,439 cps         | 2.8 %         |
| 52Cr (KED)  | 1.626 ppb             | 25,824 cps        | 0.9 %         |
| 55Mn (KED)  | 6.585 ppb             | 49,611 cps        | 1.7 %         |
| 56Fe (KED)  | 230.593 ppb           | 3,214,333 cps     | 0.7 %         |
| 58Ni (KED)  | 1.157 ppb             | 21,433 cps        | 1.2 %         |
| 59Co (KED)  | 0.130 ppb             | 3,894 cps         | 3.8 %         |
| 63Cu (KED)  | 2.299 ppb             | 50,679 cps        | 1.9 %         |
| 64Zn (KED)  | 54.906 ppb            | 305,658 cps       | 2.1 %         |
| 69Ga (KED)  | 1.097 ppb             | 7,658 cps         | 2.5 %         |
| 75As (KED)  | 0.252 ppb             | 410 cps           | 5.1 %         |
| 80Se (KED)  | 0.220 ppb             | 1,433 cps         | 7.2 %         |
| 85Rb (KED)  | 0.975 ppb             | 5,951 cps         | 2.4 %         |
| 88Sr (KED)  | 3.701 ppb             | 31,473 cps        | 2.2 %         |
| 89Y (KED)   | 98.277 %              | 458,039 cps       | 0.9 %         |
| 107Ag (KED) | 0.008 ppb             | 477 cps           | 6.7 %         |
| 114Cd (KED) | 0.022 ppb             | 448 cps           | 6.0 %         |
| 115In (KED) | 93.759 %              | 778,054 cps       | 2.5 %         |
| 133Cs (KED) | 0.041 ppb             | 1,166 cps         | 2.9 %         |
| 138Ba (KED) | 3.246 ppb             | 133,332 cps       | 1.4 %         |
| 139La (KED) | 0.194 ppb             | 17,389 cps        | 1.2 %         |
| 140Ce (KED) | 0.394 ppb             | 47,374 cps        | 1.2 %         |
| 141Pr (KED) | 0.046 ppb             | 5,590 cps         | 1.9 %         |
| 142Nd (KED) | 0.247 ppb             | 12,028 cps        | 3.8 %         |
| 152Sm (KED) | 0.035 ppb             | 1,500 cps         | 4.8 %         |
| 153Eu (KED) | 0.007 ppb             | 646 cps           | 9.1 %         |
| 158Gd (KED) | 0.034 ppb             | 1,975 cps         | 1.5 %         |
| 159Tb (KED) | 96.117 %              | 4,142,879 cps     | 0.4 %         |
| 164Dy (KED) | 0.025 ppb             | 1,609 cps         | 1.1 %         |
| 166Er (KED) | 0.011 ppb             | 1,142 cps         | 7.1 %         |
| 169Tm (KED) | 0.002 ppb             | 423 cps           | 9.8 %         |
| 174Yb (KED) | 0.010 ppb             | 886 cps           | 9.2 %         |
| 175Lu (KED) | -0.024 ppb            | 13,925 cps        | 4.0 %         |
| 205Tl (KED) | 0.005 ppb             | 783 cps           | 10.2 %        |
| 208Pb (KED) | 0.379 ppb             | 48,726 cps        | 1.3 %         |
| 209Bi (KED) | 90.345 %              | 3,188,946 cps     | 1.2 %         |
| 232Th (KED) | 0.054 ppb             | 13,032 cps        | 2.4 %         |
| 238U (KED)  | 0.014 ppb             | 3,733 cps         | 3.2 %         |

## Sample Summary

Instrument ID: iCAP Q

Analysis index: 17

Analysis name: 315047603860444 jian

Analysis started at: 11/4/2021 3:35:56 PM

User name: WINDOWS-UPCI4ER\Administrator

| Category    | Concentration average | Concentration RSD |
|-------------|-----------------------|-------------------|
| 6Li (KED)   | 105.604 %             | 3.1 %             |
| 9Be (KED)   | 0.006 ppb             | 383.3 %           |
| 11B (KED)   | -6.949 ppb            | 4.7 %             |
| 24Mg (KED)  | 172.402 ppb           | 3.3 %             |
| 27Al (KED)  | 317.543 ppb           | 2.1 %             |
| 45Sc (KED)  | 100.535 %             | 2.0 %             |
| 51V (KED)   | 0.590 ppb             | 3.3 %             |
| 52Cr (KED)  | 3.030 ppb             | 1.0 %             |
| 55Mn (KED)  | 8.724 ppb             | 1.5 %             |
| 56Fe (KED)  | 324.900 ppb           | 1.3 %             |
| 58Ni (KED)  | 1.822 ppb             | 2.4 %             |
| 59Co (KED)  | 0.171 ppb             | 5.9 %             |
| 63Cu (KED)  | 2.735 ppb             | 1.4 %             |
| 64Zn (KED)  | 66.741 ppb            | 0.5 %             |
| 69Ga (KED)  | 1.214 ppb             | 2.1 %             |
| 75As (KED)  | 0.274 ppb             | 6.3 %             |
| 80Se (KED)  | 0.293 ppb             | 54.1 %            |
| 85Rb (KED)  | 1.007 ppb             | 3.2 %             |
| 88Sr (KED)  | 2.836 ppb             | 1.1 %             |
| 89Y (KED)   | 93.454 %              | 1.1 %             |
| 107Ag (KED) | 0.008 ppb             | 12.5 %            |
| 114Cd (KED) | 0.018 ppb             | 8.9 %             |
| 115In (KED) | 90.514 %              | 0.6 %             |
| 133Cs (KED) | 0.060 ppb             | 2.7 %             |
| 138Ba (KED) | 3.653 ppb             | 3.0 %             |
| 139La (KED) | 0.264 ppb             | 1.6 %             |
| 140Ce (KED) | 0.543 ppb             | 0.9 %             |
| 141Pr (KED) | 0.063 ppb             | 0.8 %             |
| 142Nd (KED) | 0.350 ppb             | 1.1 %             |
| 152Sm (KED) | 0.047 ppb             | 8.1 %             |
| 153Eu (KED) | 0.009 ppb             | 2.1 %             |
| 158Gd (KED) | 0.043 ppb             | 3.1 %             |
| 159Tb (KED) | 88.465 %              | 0.6 %             |
| 164Dy (KED) | 0.032 ppb             | 5.0 %             |
| 166Er (KED) | 0.015 ppb             | 6.2 %             |
| 169Tm (KED) | 0.002 ppb             | 8.1 %             |
| 174Yb (KED) | 0.013 ppb             | 3.3 %             |
| 175Lu (KED) | -0.021 ppb            | 8.5 %             |
| 205Tl (KED) | 0.005 ppb             | 1.2 %             |
| 208Pb (KED) | 0.456 ppb             | 0.9 %             |
| 209Bi (KED) | 86.494 %              | 1.8 %             |
| 232Th (KED) | 0.077 ppb             | 1.2 %             |
| 238U (KED)  | 0.014 ppb             | 2.5 %             |

| Category   | Concentration average | Intensity average | Intensity RSD |
|------------|-----------------------|-------------------|---------------|
| 6Li (KED)  | 105.604 %             | 3,120 cps         | 3.1 %         |
| 9Be (KED)  | 0.006 ppb             | 2 cps             | 173.2 %       |
| 11B (KED)  | -6.949 ppb            | 294 cps           | 8.6 %         |
| 24Mg (KED) | 172.402 ppb           | 108,746 cps       | 1.3 %         |
| 27Al (KED) | 317.543 ppb           | 46,594 cps        | 2.2 %         |

# Comprehensive

11/4/2021 4:56:04 PM

| Category    | Concentration average | Intensity average | Intensity RSD |
|-------------|-----------------------|-------------------|---------------|
| 45Sc (KED)  | 100.535 %             | 54,314 cps        | 2.0 %         |
| 51V (KED)   | 0.590 ppb             | 5,796 cps         | 2.2 %         |
| 52Cr (KED)  | 3.030 ppb             | 46,863 cps        | 1.9 %         |
| 55Mn (KED)  | 8.724 ppb             | 64,090 cps        | 1.6 %         |
| 56Fe (KED)  | 324.900 ppb           | 4,417,150 cps     | 1.2 %         |
| 58Ni (KED)  | 1.822 ppb             | 32,723 cps        | 0.5 %         |
| 59Co (KED)  | 0.171 ppb             | 5,008 cps         | 3.8 %         |
| 63Cu (KED)  | 2.735 ppb             | 57,226 cps        | 0.3 %         |
| 64Zn (KED)  | 66.741 ppb            | 352,557 cps       | 1.4 %         |
| 69Ga (KED)  | 1.214 ppb             | 8,044 cps         | 1.3 %         |
| 75As (KED)  | 0.274 ppb             | 424 cps           | 5.6 %         |
| 80Se (KED)  | 0.293 ppb             | 1,395 cps         | 4.0 %         |
| 85Rb (KED)  | 1.007 ppb             | 5,839 cps         | 2.2 %         |
| 88Sr (KED)  | 2.836 ppb             | 22,960 cps        | 2.1 %         |
| 89Y (KED)   | 93.454 %              | 435,562 cps       | 1.1 %         |
| 107Ag (KED) | 0.008 ppb             | 434 cps           | 12.4 %        |
| 114Cd (KED) | 0.018 ppb             | 361 cps           | 8.9 %         |
| 115In (KED) | 90.514 %              | 751,125 cps       | 0.6 %         |
| 133Cs (KED) | 0.060 ppb             | 1,656 cps         | 3.2 %         |
| 138Ba (KED) | 3.653 ppb             | 137,942 cps       | 3.0 %         |
| 139La (KED) | 0.264 ppb             | 21,770 cps        | 1.5 %         |
| 140Ce (KED) | 0.543 ppb             | 59,910 cps        | 1.3 %         |
| 141Pr (KED) | 0.063 ppb             | 7,030 cps         | 1.1 %         |
| 142Nd (KED) | 0.350 ppb             | 15,700 cps        | 1.1 %         |
| 152Sm (KED) | 0.047 ppb             | 1,852 cps         | 8.4 %         |
| 153Eu (KED) | 0.009 ppb             | 710 cps           | 2.6 %         |
| 158Gd (KED) | 0.043 ppb             | 2,292 cps         | 2.8 %         |
| 159Tb (KED) | 88.465 %              | 3,813,048 cps     | 0.6 %         |
| 164Dy (KED) | 0.032 ppb             | 1,870 cps         | 5.0 %         |
| 166Er (KED) | 0.015 ppb             | 1,286 cps         | 5.2 %         |
| 169Tm (KED) | 0.002 ppb             | 481 cps           | 8.4 %         |
| 174Yb (KED) | 0.013 ppb             | 1,100 cps         | 3.8 %         |
| 175Lu (KED) | -0.021 ppb            | 13,145 cps        | 1.5 %         |
| 205Tl (KED) | 0.005 ppb             | 860 cps           | 2.1 %         |
| 208Pb (KED) | 0.456 ppb             | 55,424 cps        | 2.3 %         |
| 209Bi (KED) | 86.494 %              | 3,053,015 cps     | 1.8 %         |
| 232Th (KED) | 0.077 ppb             | 17,833 cps        | 2.1 %         |
| 238U (KED)  | 0.014 ppb             | 3,699 cps         | 3.5 %         |

## Sample Summary

Instrument ID: iCAP Q

Analysis index: 18

Analysis name: 315047603860458

Analysis started at: 11/4/2021 3:39:15 PM

User name: WINDOWS-UPCI4ER\Administrator

| Category    | Concentration average | Concentration RSD |
|-------------|-----------------------|-------------------|
| 6Li (KED)   | 106.507 %             | 6.7 %             |
| 9Be (KED)   | -0.001 ppb            | 1,887.9 %         |
| 11B (KED)   | -5.885 ppb            | 13.1 %            |
| 24Mg (KED)  | 205.958 ppb           | 7.0 %             |
| 27Al (KED)  | 356.243 ppb           | 2.4 %             |
| 45Sc (KED)  | 103.913 %             | 1.7 %             |
| 51V (KED)   | 0.699 ppb             | 4.1 %             |
| 52Cr (KED)  | 0.925 ppb             | 1.0 %             |
| 55Mn (KED)  | 7.942 ppb             | 2.4 %             |
| 56Fe (KED)  | 374.734 ppb           | 0.6 %             |
| 58Ni (KED)  | 1.558 ppb             | 0.6 %             |
| 59Co (KED)  | 0.166 ppb             | 0.8 %             |
| 63Cu (KED)  | 3.218 ppb             | 1.8 %             |
| 64Zn (KED)  | 62.310 ppb            | 1.5 %             |
| 69Ga (KED)  | 1.235 ppb             | 1.0 %             |
| 75As (KED)  | 0.294 ppb             | 5.9 %             |
| 80Se (KED)  | 0.266 ppb             | 55.9 %            |
| 85Rb (KED)  | 1.002 ppb             | 2.4 %             |
| 88Sr (KED)  | 2.895 ppb             | 1.6 %             |
| 89Y (KED)   | 97.030 %              | 1.6 %             |
| 107Ag (KED) | 0.016 ppb             | 3.2 %             |
| 114Cd (KED) | 0.021 ppb             | 8.7 %             |
| 115In (KED) | 94.580 %              | 2.0 %             |
| 133Cs (KED) | 0.074 ppb             | 1.0 %             |
| 138Ba (KED) | 3.611 ppb             | 2.3 %             |
| 139La (KED) | 0.337 ppb             | 0.5 %             |
| 140Ce (KED) | 0.692 ppb             | 2.9 %             |
| 141Pr (KED) | 0.080 ppb             | 3.7 %             |
| 142Nd (KED) | 0.427 ppb             | 3.6 %             |
| 152Sm (KED) | 0.060 ppb             | 5.0 %             |
| 153Eu (KED) | 0.011 ppb             | 11.7 %            |
| 158Gd (KED) | 0.051 ppb             | 2.5 %             |
| 159Tb (KED) | 94.967 %              | 3.0 %             |
| 164Dy (KED) | 0.035 ppb             | 2.8 %             |
| 166Er (KED) | 0.017 ppb             | 11.1 %            |
| 169Tm (KED) | 0.003 ppb             | 3.1 %             |
| 174Yb (KED) | 0.016 ppb             | 6.0 %             |
| 175Lu (KED) | -0.021 ppb            | 13.8 %            |
| 205Tl (KED) | 0.006 ppb             | 4.4 %             |
| 208Pb (KED) | 0.430 ppb             | 2.4 %             |
| 209Bi (KED) | 89.486 %              | 4.2 %             |
| 232Th (KED) | 0.094 ppb             | 5.9 %             |
| 238U (KED)  | 0.014 ppb             | 8.0 %             |

| Category   | Concentration average | Intensity average | Intensity RSD |
|------------|-----------------------|-------------------|---------------|
| 6Li (KED)  | 106.507 %             | 3,147 cps         | 6.7 %         |
| 9Be (KED)  | -0.001 ppb            | 1 cps             | 173.2 %       |
| 11B (KED)  | -5.885 ppb            | 386 cps           | 10.4 %        |
| 24Mg (KED) | 205.958 ppb           | 130,655 cps       | 0.4 %         |
| 27Al (KED) | 356.243 ppb           | 54,009 cps        | 1.5 %         |

# Comprehensive

11/4/2021 4:56:04 PM

| Category    | Concentration average | Intensity average | Intensity RSD |
|-------------|-----------------------|-------------------|---------------|
| 45Sc (KED)  | 103.913 %             | 56,138 cps        | 1.7 %         |
| 51V (KED)   | 0.699 ppb             | 7,103 cps         | 2.8 %         |
| 52Cr (KED)  | 0.925 ppb             | 14,856 cps        | 0.7 %         |
| 55Mn (KED)  | 7.942 ppb             | 60,303 cps        | 0.9 %         |
| 56Fe (KED)  | 374.734 ppb           | 5,265,902 cps     | 1.3 %         |
| 58Ni (KED)  | 1.558 ppb             | 28,979 cps        | 1.2 %         |
| 59Co (KED)  | 0.166 ppb             | 5,018 cps         | 2.0 %         |
| 63Cu (KED)  | 3.218 ppb             | 69,809 cps        | 0.2 %         |
| 64Zn (KED)  | 62.310 ppb            | 341,925 cps       | 0.4 %         |
| 69Ga (KED)  | 1.235 ppb             | 8,500 cps         | 2.4 %         |
| 75As (KED)  | 0.294 ppb             | 471 cps           | 6.4 %         |
| 80Se (KED)  | 0.266 ppb             | 1,436 cps         | 4.2 %         |
| 85Rb (KED)  | 1.002 ppb             | 6,035 cps         | 1.2 %         |
| 88Sr (KED)  | 2.895 ppb             | 24,327 cps        | 0.4 %         |
| 89Y (KED)   | 97.030 %              | 452,229 cps       | 1.6 %         |
| 107Ag (KED) | 0.016 ppb             | 907 cps           | 2.6 %         |
| 114Cd (KED) | 0.021 ppb             | 430 cps           | 8.1 %         |
| 115In (KED) | 94.580 %              | 784,868 cps       | 2.0 %         |
| 133Cs (KED) | 0.074 ppb             | 2,130 cps         | 2.9 %         |
| 138Ba (KED) | 3.611 ppb             | 146,326 cps       | 1.1 %         |
| 139La (KED) | 0.337 ppb             | 29,887 cps        | 2.7 %         |
| 140Ce (KED) | 0.692 ppb             | 81,862 cps        | 0.2 %         |
| 141Pr (KED) | 0.080 ppb             | 9,501 cps         | 2.1 %         |
| 142Nd (KED) | 0.427 ppb             | 20,547 cps        | 0.8 %         |
| 152Sm (KED) | 0.060 ppb             | 2,505 cps         | 3.4 %         |
| 153Eu (KED) | 0.011 ppb             | 951 cps           | 10.1 %        |
| 158Gd (KED) | 0.051 ppb             | 2,913 cps         | 2.4 %         |
| 159Tb (KED) | 94.967 %              | 4,093,311 cps     | 3.0 %         |
| 164Dy (KED) | 0.035 ppb             | 2,235 cps         | 0.3 %         |
| 166Er (KED) | 0.017 ppb             | 1,546 cps         | 6.0 %         |
| 169Tm (KED) | 0.003 ppb             | 621 cps           | 2.8 %         |
| 174Yb (KED) | 0.016 ppb             | 1,407 cps         | 3.4 %         |
| 175Lu (KED) | -0.021 ppb            | 14,184 cps        | 0.6 %         |
| 205Tl (KED) | 0.006 ppb             | 959 cps           | 1.0 %         |
| 208Pb (KED) | 0.430 ppb             | 54,241 cps        | 2.3 %         |
| 209Bi (KED) | 89.486 %              | 3,158,640 cps     | 4.2 %         |
| 232Th (KED) | 0.094 ppb             | 22,494 cps        | 3.1 %         |
| 238U (KED)  | 0.014 ppb             | 3,778 cps         | 3.9 %         |

## Sample Summary

Instrument ID: iCAP Q

Analysis index: 19

Analysis name: 315047603860441

Analysis started at: 11/4/2021 3:42:29 PM

User name: WINDOWS-UPCI4ER\Administrator

| Category    | Concentration average | Concentration RSD |
|-------------|-----------------------|-------------------|
| 6Li (KED)   | 113.465 %             | 3.4 %             |
| 9Be (KED)   | -0.007 ppb            | 0.0 %             |
| 11B (KED)   | -8.532 ppb            | 1.3 %             |
| 24Mg (KED)  | 246.342 ppb           | 2.8 %             |
| 27Al (KED)  | 378.513 ppb           | 2.6 %             |
| 45Sc (KED)  | 105.888 %             | 0.6 %             |
| 51V (KED)   | 0.752 ppb             | 3.5 %             |
| 52Cr (KED)  | 1.210 ppb             | 3.7 %             |
| 55Mn (KED)  | 8.334 ppb             | 1.7 %             |
| 56Fe (KED)  | 362.519 ppb           | 0.9 %             |
| 58Ni (KED)  | 1.860 ppb             | 2.7 %             |
| 59Co (KED)  | 0.190 ppb             | 1.5 %             |
| 63Cu (KED)  | 2.724 ppb             | 2.5 %             |
| 64Zn (KED)  | 72.311 ppb            | 2.3 %             |
| 69Ga (KED)  | 1.371 ppb             | 3.7 %             |
| 75As (KED)  | 0.383 ppb             | 5.2 %             |
| 80Se (KED)  | 0.152 ppb             | 69.2 %            |
| 85Rb (KED)  | 0.902 ppb             | 1.7 %             |
| 88Sr (KED)  | 3.596 ppb             | 1.5 %             |
| 89Y (KED)   | 99.121 %              | 1.7 %             |
| 107Ag (KED) | 0.019 ppb             | 4.6 %             |
| 114Cd (KED) | 0.031 ppb             | 12.7 %            |
| 115In (KED) | 96.201 %              | 0.7 %             |
| 133Cs (KED) | 0.072 ppb             | 6.4 %             |
| 138Ba (KED) | 3.992 ppb             | 1.0 %             |
| 139La (KED) | 0.284 ppb             | 0.7 %             |
| 140Ce (KED) | 0.577 ppb             | 1.9 %             |
| 141Pr (KED) | 0.069 ppb             | 1.5 %             |
| 142Nd (KED) | 0.371 ppb             | 4.5 %             |
| 152Sm (KED) | 0.053 ppb             | 1.0 %             |
| 153Eu (KED) | 0.010 ppb             | 2.5 %             |
| 158Gd (KED) | 0.046 ppb             | 3.2 %             |
| 159Tb (KED) | 99.750 %              | 0.6 %             |
| 164Dy (KED) | 0.034 ppb             | 2.2 %             |
| 166Er (KED) | 0.017 ppb             | 2.9 %             |
| 169Tm (KED) | 0.002 ppb             | 6.8 %             |
| 174Yb (KED) | 0.016 ppb             | 4.2 %             |
| 175Lu (KED) | -0.022 ppb            | 27.7 %            |
| 205Tl (KED) | 0.006 ppb             | 6.0 %             |
| 208Pb (KED) | 0.965 ppb             | 1.7 %             |
| 209Bi (KED) | 92.182 %              | 1.8 %             |
| 232Th (KED) | 0.087 ppb             | 2.4 %             |
| 238U (KED)  | 0.018 ppb             | 4.4 %             |

| Category   | Concentration average | Intensity average | Intensity RSD |
|------------|-----------------------|-------------------|---------------|
| 6Li (KED)  | 113.465 %             | 3,353 cps         | 3.4 %         |
| 9Be (KED)  | -0.007 ppb            | 0 cps             |               |
| 11B (KED)  | -8.532 ppb            | 172 cps           | 7.8 %         |
| 24Mg (KED) | 246.342 ppb           | 166,857 cps       | 1.1 %         |
| 27Al (KED) | 378.513 ppb           | 58,476 cps        | 1.9 %         |

# Comprehensive

11/4/2021 4:56:04 PM

| Category    | Concentration average | Intensity average | Intensity RSD |
|-------------|-----------------------|-------------------|---------------|
| 45Sc (KED)  | 105.888 %             | 57,205 cps        | 0.6 %         |
| 51V (KED)   | 0.752 ppb             | 7,781 cps         | 2.9 %         |
| 52Cr (KED)  | 1.210 ppb             | 19,763 cps        | 3.0 %         |
| 55Mn (KED)  | 8.334 ppb             | 64,489 cps        | 1.1 %         |
| 56Fe (KED)  | 362.519 ppb           | 5,191,254 cps     | 0.5 %         |
| 58Ni (KED)  | 1.860 ppb             | 35,175 cps        | 2.2 %         |
| 59Co (KED)  | 0.190 ppb             | 5,857 cps         | 1.8 %         |
| 63Cu (KED)  | 2.724 ppb             | 60,453 cps        | 2.6 %         |
| 64Zn (KED)  | 72.311 ppb            | 404,728 cps       | 0.6 %         |
| 69Ga (KED)  | 1.371 ppb             | 9,623 cps         | 2.0 %         |
| 75As (KED)  | 0.383 ppb             | 624 cps           | 6.7 %         |
| 80Se (KED)  | 0.152 ppb             | 1,413 cps         | 1.9 %         |
| 85Rb (KED)  | 0.902 ppb             | 5,560 cps         | 3.3 %         |
| 88Sr (KED)  | 3.596 ppb             | 30,843 cps        | 1.3 %         |
| 89Y (KED)   | 99.121 %              | 461,975 cps       | 1.7 %         |
| 107Ag (KED) | 0.019 ppb             | 1,063 cps         | 4.4 %         |
| 114Cd (KED) | 0.031 ppb             | 640 cps           | 12.8 %        |
| 115In (KED) | 96.201 %              | 798,318 cps       | 0.7 %         |
| 133Cs (KED) | 0.072 ppb             | 2,110 cps         | 6.3 %         |
| 138Ba (KED) | 3.992 ppb             | 169,815 cps       | 0.8 %         |
| 139La (KED) | 0.284 ppb             | 26,434 cps        | 0.5 %         |
| 140Ce (KED) | 0.577 ppb             | 71,872 cps        | 2.4 %         |
| 141Pr (KED) | 0.069 ppb             | 8,617 cps         | 1.0 %         |
| 142Nd (KED) | 0.371 ppb             | 18,731 cps        | 3.9 %         |
| 152Sm (KED) | 0.053 ppb             | 2,346 cps         | 1.1 %         |
| 153Eu (KED) | 0.010 ppb             | 881 cps           | 2.5 %         |
| 158Gd (KED) | 0.046 ppb             | 2,771 cps         | 2.7 %         |
| 159Tb (KED) | 99.750 %              | 4,299,461 cps     | 0.6 %         |
| 164Dy (KED) | 0.034 ppb             | 2,269 cps         | 2.6 %         |
| 166Er (KED) | 0.017 ppb             | 1,610 cps         | 2.6 %         |
| 169Tm (KED) | 0.002 ppb             | 611 cps           | 6.3 %         |
| 174Yb (KED) | 0.016 ppb             | 1,478 cps         | 4.0 %         |
| 175Lu (KED) | -0.022 ppb            | 14,689 cps        | 6.9 %         |
| 205Tl (KED) | 0.006 ppb             | 978 cps           | 7.7 %         |
| 208Pb (KED) | 0.965 ppb             | 120,481 cps       | 0.1 %         |
| 209Bi (KED) | 92.182 %              | 3,253,787 cps     | 1.8 %         |
| 232Th (KED) | 0.087 ppb             | 21,349 cps        | 0.9 %         |
| 238U (KED)  | 0.018 ppb             | 4,939 cps         | 3.0 %         |

## Sample Summary

Instrument ID: iCAP Q

Analysis index: 20

Analysis name: 315047603860496 jian

Analysis started at: 11/4/2021 3:45:41 PM

User name: WINDOWS-UPCI4ER\Administrator

| Category    | Concentration average | Concentration RSD |
|-------------|-----------------------|-------------------|
| 6Li (KED)   | 106.168 %             | 4.2 %             |
| 9Be (KED)   | 0.006 ppb             | 180.8 %           |
| 11B (KED)   | -6.102 ppb            | 14.5 %            |
| 24Mg (KED)  | 220.829 ppb           | 3.3 %             |
| 27Al (KED)  | 338.630 ppb           | 1.5 %             |
| 45Sc (KED)  | 104.181 %             | 0.8 %             |
| 51V (KED)   | 0.634 ppb             | 2.5 %             |
| 52Cr (KED)  | 0.843 ppb             | 2.5 %             |
| 55Mn (KED)  | 8.537 ppb             | 2.0 %             |
| 56Fe (KED)  | 330.020 ppb           | 0.4 %             |
| 58Ni (KED)  | 1.404 ppb             | 0.5 %             |
| 59Co (KED)  | 0.153 ppb             | 2.0 %             |
| 63Cu (KED)  | 2.230 ppb             | 1.0 %             |
| 64Zn (KED)  | 60.597 ppb            | 1.1 %             |
| 69Ga (KED)  | 1.317 ppb             | 3.7 %             |
| 75As (KED)  | 0.361 ppb             | 1.9 %             |
| 80Se (KED)  | 0.142 ppb             | 180.4 %           |
| 85Rb (KED)  | 0.915 ppb             | 5.0 %             |
| 88Sr (KED)  | 3.701 ppb             | 4.3 %             |
| 89Y (KED)   | 97.073 %              | 1.2 %             |
| 107Ag (KED) | 0.010 ppb             | 10.3 %            |
| 114Cd (KED) | 0.026 ppb             | 4.2 %             |
| 115In (KED) | 93.567 %              | 1.2 %             |
| 133Cs (KED) | 0.068 ppb             | 2.8 %             |
| 138Ba (KED) | 4.005 ppb             | 1.9 %             |
| 139La (KED) | 0.251 ppb             | 2.9 %             |
| 140Ce (KED) | 0.524 ppb             | 1.0 %             |
| 141Pr (KED) | 0.059 ppb             | 1.6 %             |
| 142Nd (KED) | 0.332 ppb             | 1.8 %             |
| 152Sm (KED) | 0.047 ppb             | 8.1 %             |
| 153Eu (KED) | 0.010 ppb             | 3.9 %             |
| 158Gd (KED) | 0.041 ppb             | 3.8 %             |
| 159Tb (KED) | 95.636 %              | 2.1 %             |
| 164Dy (KED) | 0.031 ppb             | 0.8 %             |
| 166Er (KED) | 0.015 ppb             | 8.2 %             |
| 169Tm (KED) | 0.002 ppb             | 6.0 %             |
| 174Yb (KED) | 0.014 ppb             | 1.4 %             |
| 175Lu (KED) | -0.021 ppb            | 10.3 %            |
| 205Tl (KED) | 0.005 ppb             | 7.3 %             |
| 208Pb (KED) | 0.414 ppb             | 3.3 %             |
| 209Bi (KED) | 91.082 %              | 1.4 %             |
| 232Th (KED) | 0.076 ppb             | 2.7 %             |
| 238U (KED)  | 0.015 ppb             | 7.0 %             |

| Category   | Concentration average | Intensity average | Intensity RSD |
|------------|-----------------------|-------------------|---------------|
| 6Li (KED)  | 106.168 %             | 3,137 cps         | 4.2 %         |
| 9Be (KED)  | 0.006 ppb             | 2 cps             | 86.6 %        |
| 11B (KED)  | -6.102 ppb            | 369 cps           | 21.4 %        |
| 24Mg (KED) | 220.829 ppb           | 139,934 cps       | 0.9 %         |
| 27Al (KED) | 338.630 ppb           | 51,493 cps        | 2.4 %         |

# Comprehensive

11/4/2021 4:56:04 PM

| Category    | Concentration average | Intensity average | Intensity RSD |
|-------------|-----------------------|-------------------|---------------|
| 45Sc (KED)  | 104.181 %             | 56,283 cps        | 0.8 %         |
| 51V (KED)   | 0.634 ppb             | 6,462 cps         | 1.8 %         |
| 52Cr (KED)  | 0.843 ppb             | 13,573 cps        | 1.7 %         |
| 55Mn (KED)  | 8.537 ppb             | 64,992 cps        | 1.7 %         |
| 56Fe (KED)  | 330.020 ppb           | 4,650,143 cps     | 1.1 %         |
| 58Ni (KED)  | 1.404 ppb             | 26,223 cps        | 0.6 %         |
| 59Co (KED)  | 0.153 ppb             | 4,645 cps         | 2.8 %         |
| 63Cu (KED)  | 2.230 ppb             | 48,560 cps        | 1.7 %         |
| 64Zn (KED)  | 60.597 ppb            | 332,797 cps       | 0.2 %         |
| 69Ga (KED)  | 1.317 ppb             | 9,056 cps         | 2.6 %         |
| 75As (KED)  | 0.361 ppb             | 577 cps           | 1.2 %         |
| 80Se (KED)  | 0.142 ppb             | 1,380 cps         | 8.6 %         |
| 85Rb (KED)  | 0.915 ppb             | 5,519 cps         | 3.9 %         |
| 88Sr (KED)  | 3.701 ppb             | 31,075 cps        | 3.2 %         |
| 89Y (KED)   | 97.073 %              | 452,428 cps       | 1.2 %         |
| 107Ag (KED) | 0.010 ppb             | 566 cps           | 8.7 %         |
| 114Cd (KED) | 0.026 ppb             | 521 cps           | 4.5 %         |
| 115In (KED) | 93.567 %              | 776,459 cps       | 1.2 %         |
| 133Cs (KED) | 0.068 ppb             | 1,929 cps         | 1.7 %         |
| 138Ba (KED) | 4.005 ppb             | 163,313 cps       | 1.7 %         |
| 139La (KED) | 0.251 ppb             | 22,387 cps        | 2.7 %         |
| 140Ce (KED) | 0.524 ppb             | 62,604 cps        | 1.8 %         |
| 141Pr (KED) | 0.059 ppb             | 7,162 cps         | 1.5 %         |
| 142Nd (KED) | 0.332 ppb             | 16,085 cps        | 0.8 %         |
| 152Sm (KED) | 0.047 ppb             | 1,978 cps         | 6.1 %         |
| 153Eu (KED) | 0.010 ppb             | 831 cps           | 4.9 %         |
| 158Gd (KED) | 0.041 ppb             | 2,367 cps         | 2.3 %         |
| 159Tb (KED) | 95.636 %              | 4,122,140 cps     | 2.1 %         |
| 164Dy (KED) | 0.031 ppb             | 1,989 cps         | 2.6 %         |
| 166Er (KED) | 0.015 ppb             | 1,427 cps         | 5.1 %         |
| 169Tm (KED) | 0.002 ppb             | 569 cps           | 7.4 %         |
| 174Yb (KED) | 0.014 ppb             | 1,228 cps         | 3.1 %         |
| 175Lu (KED) | -0.021 ppb            | 14,222 cps        | 3.7 %         |
| 205Tl (KED) | 0.005 ppb             | 930 cps           | 6.0 %         |
| 208Pb (KED) | 0.414 ppb             | 53,237 cps        | 2.1 %         |
| 209Bi (KED) | 91.082 %              | 3,214,965 cps     | 1.4 %         |
| 232Th (KED) | 0.076 ppb             | 18,504 cps        | 2.2 %         |
| 238U (KED)  | 0.015 ppb             | 4,194 cps         | 6.3 %         |

## Sample Summary

Instrument ID: iCAP Q

Analysis index: 21

Analysis name: 315047603860524

Analysis started at: 11/4/2021 3:48:58 PM

User name: WINDOWS-UPCI4ER\Administrator

| Category    | Concentration average | Concentration RSD |
|-------------|-----------------------|-------------------|
| 6Li (KED)   | 112.337 %             | 0.3 %             |
| 9Be (KED)   | -0.001 ppb            | 1,390.2 %         |
| 11B (KED)   | -7.689 ppb            | 3.2 %             |
| 24Mg (KED)  | 123.920 ppb           | 0.7 %             |
| 27Al (KED)  | 185.001 ppb           | 1.5 %             |
| 45Sc (KED)  | 102.927 %             | 1.2 %             |
| 51V (KED)   | 0.355 ppb             | 1.7 %             |
| 52Cr (KED)  | 0.451 ppb             | 4.4 %             |
| 55Mn (KED)  | 4.844 ppb             | 1.8 %             |
| 56Fe (KED)  | 176.473 ppb           | 0.3 %             |
| 58Ni (KED)  | 0.890 ppb             | 0.6 %             |
| 59Co (KED)  | 0.104 ppb             | 1.7 %             |
| 63Cu (KED)  | 1.672 ppb             | 2.3 %             |
| 64Zn (KED)  | 63.955 ppb            | 0.7 %             |
| 69Ga (KED)  | 0.782 ppb             | 1.8 %             |
| 75As (KED)  | 0.223 ppb             | 8.4 %             |
| 80Se (KED)  | 0.248 ppb             | 140.7 %           |
| 85Rb (KED)  | 0.577 ppb             | 1.0 %             |
| 88Sr (KED)  | 1.905 ppb             | 1.0 %             |
| 89Y (KED)   | 97.973 %              | 0.6 %             |
| 107Ag (KED) | 0.008 ppb             | 13.5 %            |
| 114Cd (KED) | 0.011 ppb             | 6.9 %             |
| 115In (KED) | 92.947 %              | 2.1 %             |
| 133Cs (KED) | 0.038 ppb             | 9.4 %             |
| 138Ba (KED) | 2.410 ppb             | 0.9 %             |
| 139La (KED) | 0.164 ppb             | 1.5 %             |
| 140Ce (KED) | 0.355 ppb             | 1.4 %             |
| 141Pr (KED) | 0.040 ppb             | 2.9 %             |
| 142Nd (KED) | 0.221 ppb             | 0.5 %             |
| 152Sm (KED) | 0.030 ppb             | 2.7 %             |
| 153Eu (KED) | 0.006 ppb             | 10.0 %            |
| 158Gd (KED) | 0.028 ppb             | 3.5 %             |
| 159Tb (KED) | 97.037 %              | 0.9 %             |
| 164Dy (KED) | 0.018 ppb             | 2.9 %             |
| 166Er (KED) | 0.008 ppb             | 3.7 %             |
| 169Tm (KED) | 0.001 ppb             | 1.6 %             |
| 174Yb (KED) | 0.008 ppb             | 15.6 %            |
| 175Lu (KED) | -0.025 ppb            | 21.7 %            |
| 205Tl (KED) | 0.004 ppb             | 2.1 %             |
| 208Pb (KED) | 0.276 ppb             | 2.3 %             |
| 209Bi (KED) | 91.370 %              | 1.4 %             |
| 232Th (KED) | 0.049 ppb             | 0.9 %             |
| 238U (KED)  | 0.009 ppb             | 5.4 %             |

| Category   | Concentration average | Intensity average | Intensity RSD |
|------------|-----------------------|-------------------|---------------|
| 6Li (KED)  | 112.337 %             | 3,319 cps         | 0.3 %         |
| 9Be (KED)  | -0.001 ppb            | 1 cps             | 173.2 %       |
| 11B (KED)  | -7.689 ppb            | 247 cps           | 9.5 %         |
| 24Mg (KED) | 123.920 ppb           | 83,260 cps        | 0.4 %         |
| 27Al (KED) | 185.001 ppb           | 27,838 cps        | 0.3 %         |

# Comprehensive

11/4/2021 4:56:04 PM

| Category    | Concentration average | Intensity average | Intensity RSD |
|-------------|-----------------------|-------------------|---------------|
| 45Sc (KED)  | 102.927 %             | 55,606 cps        | 1.2 %         |
| 51V (KED)   | 0.355 ppb             | 3,571 cps         | 1.5 %         |
| 52Cr (KED)  | 0.451 ppb             | 7,215 cps         | 3.4 %         |
| 55Mn (KED)  | 4.844 ppb             | 36,471 cps        | 2.8 %         |
| 56Fe (KED)  | 176.473 ppb           | 2,457,709 cps     | 1.4 %         |
| 58Ni (KED)  | 0.890 ppb             | 16,548 cps        | 1.5 %         |
| 59Co (KED)  | 0.104 ppb             | 3,136 cps         | 1.5 %         |
| 63Cu (KED)  | 1.672 ppb             | 36,883 cps        | 2.6 %         |
| 64Zn (KED)  | 63.955 ppb            | 354,326 cps       | 1.3 %         |
| 69Ga (KED)  | 0.782 ppb             | 5,462 cps         | 1.8 %         |
| 75As (KED)  | 0.223 ppb             | 364 cps           | 7.8 %         |
| 80Se (KED)  | 0.248 ppb             | 1,441 cps         | 10.6 %        |
| 85Rb (KED)  | 0.577 ppb             | 3,546 cps         | 1.6 %         |
| 88Sr (KED)  | 1.905 ppb             | 16,208 cps        | 1.1 %         |
| 89Y (KED)   | 97.973 %              | 456,622 cps       | 0.6 %         |
| 107Ag (KED) | 0.008 ppb             | 447 cps           | 11.0 %        |
| 114Cd (KED) | 0.011 ppb             | 241 cps           | 8.1 %         |
| 115In (KED) | 92.947 %              | 771,313 cps       | 2.1 %         |
| 133Cs (KED) | 0.038 ppb             | 1,084 cps         | 10.0 %        |
| 138Ba (KED) | 2.410 ppb             | 100,304 cps       | 1.6 %         |
| 139La (KED) | 0.164 ppb             | 14,844 cps        | 2.0 %         |
| 140Ce (KED) | 0.355 ppb             | 43,064 cps        | 1.7 %         |
| 141Pr (KED) | 0.040 ppb             | 4,854 cps         | 3.6 %         |
| 142Nd (KED) | 0.221 ppb             | 10,896 cps        | 1.3 %         |
| 152Sm (KED) | 0.030 ppb             | 1,301 cps         | 2.3 %         |
| 153Eu (KED) | 0.006 ppb             | 524 cps           | 10.7 %        |
| 158Gd (KED) | 0.028 ppb             | 1,636 cps         | 3.2 %         |
| 159Tb (KED) | 97.037 %              | 4,182,506 cps     | 0.9 %         |
| 164Dy (KED) | 0.018 ppb             | 1,196 cps         | 3.6 %         |
| 166Er (KED) | 0.008 ppb             | 917 cps           | 3.2 %         |
| 169Tm (KED) | 0.001 ppb             | 317 cps           | 2.1 %         |
| 174Yb (KED) | 0.008 ppb             | 743 cps           | 16.0 %        |
| 175Lu (KED) | -0.025 ppb            | 13,889 cps        | 5.1 %         |
| 205Tl (KED) | 0.004 ppb             | 638 cps           | 2.1 %         |
| 208Pb (KED) | 0.276 ppb             | 36,921 cps        | 0.7 %         |
| 209Bi (KED) | 91.370 %              | 3,225,134 cps     | 1.4 %         |
| 232Th (KED) | 0.049 ppb             | 11,903 cps        | 0.9 %         |
| 238U (KED)  | 0.009 ppb             | 2,360 cps         | 5.2 %         |

## Sample Summary

Instrument ID: iCAP Q

Analysis index: 22

Analysis name: 315047603860497 jian

Analysis started at: 11/4/2021 3:52:11 PM

User name: WINDOWS-UPCI4ER\Administrator

| Category    | Concentration average | Concentration RSD |
|-------------|-----------------------|-------------------|
| 6Li (KED)   | 106.958 %             | 2.1 %             |
| 9Be (KED)   | -0.007 ppb            | 0.0 %             |
| 11B (KED)   | -7.285 ppb            | 8.7 %             |
| 24Mg (KED)  | 261.957 ppb           | 2.3 %             |
| 27Al (KED)  | 410.924 ppb           | 1.9 %             |
| 45Sc (KED)  | 104.233 %             | 2.0 %             |
| 51V (KED)   | 0.769 ppb             | 2.0 %             |
| 52Cr (KED)  | 1.158 ppb             | 1.3 %             |
| 55Mn (KED)  | 10.483 ppb            | 0.7 %             |
| 56Fe (KED)  | 381.047 ppb           | 1.9 %             |
| 58Ni (KED)  | 1.657 ppb             | 0.8 %             |
| 59Co (KED)  | 0.183 ppb             | 1.6 %             |
| 63Cu (KED)  | 2.605 ppb             | 0.6 %             |
| 64Zn (KED)  | 68.652 ppb            | 13.8 %            |
| 69Ga (KED)  | 1.640 ppb             | 2.7 %             |
| 75As (KED)  | 0.494 ppb             | 1.3 %             |
| 80Se (KED)  | 0.221 ppb             | 26.8 %            |
| 85Rb (KED)  | 1.061 ppb             | 2.4 %             |
| 88Sr (KED)  | 4.152 ppb             | 2.7 %             |
| 89Y (KED)   | 99.445 %              | 1.0 %             |
| 107Ag (KED) | 0.024 ppb             | 2.9 %             |
| 114Cd (KED) | 0.034 ppb             | 16.2 %            |
| 115In (KED) | 95.242 %              | 0.8 %             |
| 133Cs (KED) | 0.079 ppb             | 2.0 %             |
| 138Ba (KED) | 4.939 ppb             | 1.9 %             |
| 139La (KED) | 0.327 ppb             | 1.8 %             |
| 140Ce (KED) | 0.696 ppb             | 0.5 %             |
| 141Pr (KED) | 0.081 ppb             | 1.0 %             |
| 142Nd (KED) | 0.442 ppb             | 3.4 %             |
| 152Sm (KED) | 0.062 ppb             | 2.9 %             |
| 153Eu (KED) | 0.012 ppb             | 7.1 %             |
| 158Gd (KED) | 0.055 ppb             | 3.7 %             |
| 159Tb (KED) | 97.126 %              | 1.6 %             |
| 164Dy (KED) | 0.041 ppb             | 7.9 %             |
| 166Er (KED) | 0.018 ppb             | 3.5 %             |
| 169Tm (KED) | 0.003 ppb             | 8.3 %             |
| 174Yb (KED) | 0.017 ppb             | 1.2 %             |
| 175Lu (KED) | -0.022 ppb            | 2.9 %             |
| 205Tl (KED) | 0.006 ppb             | 5.2 %             |
| 208Pb (KED) | 0.532 ppb             | 1.1 %             |
| 209Bi (KED) | 89.977 %              | 2.6 %             |
| 232Th (KED) | 0.099 ppb             | 4.2 %             |
| 238U (KED)  | 0.018 ppb             | 3.9 %             |

| Category   | Concentration average | Intensity average | Intensity RSD |
|------------|-----------------------|-------------------|---------------|
| 6Li (KED)  | 106.958 %             | 3,160 cps         | 2.1 %         |
| 9Be (KED)  | -0.007 ppb            | 0 cps             |               |
| 11B (KED)  | -7.285 ppb            | 269 cps           | 18.1 %        |
| 24Mg (KED) | 261.957 ppb           | 167,300 cps       | 1.1 %         |
| 27Al (KED) | 410.924 ppb           | 62,473 cps        | 0.5 %         |

# Comprehensive

11/4/2021 4:56:04 PM

| Category    | Concentration average | Intensity average | Intensity RSD |
|-------------|-----------------------|-------------------|---------------|
| 45Sc (KED)  | 104.233 %             | 56,311 cps        | 2.0 %         |
| 51V (KED)   | 0.769 ppb             | 7,841 cps         | 3.2 %         |
| 52Cr (KED)  | 1.158 ppb             | 18,628 cps        | 0.9 %         |
| 55Mn (KED)  | 10.483 ppb            | 79,834 cps        | 1.7 %         |
| 56Fe (KED)  | 381.047 ppb           | 5,370,116 cps     | 0.8 %         |
| 58Ni (KED)  | 1.657 ppb             | 30,889 cps        | 1.3 %         |
| 59Co (KED)  | 0.183 ppb             | 5,538 cps         | 0.9 %         |
| 63Cu (KED)  | 2.605 ppb             | 58,025 cps        | 0.4 %         |
| 64Zn (KED)  | 68.652 ppb            | 385,752 cps       | 13.5 %        |
| 69Ga (KED)  | 1.640 ppb             | 11,536 cps        | 2.0 %         |
| 75As (KED)  | 0.494 ppb             | 804 cps           | 1.9 %         |
| 80Se (KED)  | 0.221 ppb             | 1,451 cps         | 3.0 %         |
| 85Rb (KED)  | 1.061 ppb             | 6,543 cps         | 2.1 %         |
| 88Sr (KED)  | 4.152 ppb             | 35,709 cps        | 2.1 %         |
| 89Y (KED)   | 99.445 %              | 463,484 cps       | 1.0 %         |
| 107Ag (KED) | 0.024 ppb             | 1,352 cps         | 3.7 %         |
| 114Cd (KED) | 0.034 ppb             | 692 cps           | 15.2 %        |
| 115In (KED) | 95.242 %              | 790,360 cps       | 0.8 %         |
| 133Cs (KED) | 0.079 ppb             | 2,279 cps         | 2.7 %         |
| 138Ba (KED) | 4.939 ppb             | 204,220 cps       | 1.8 %         |
| 139La (KED) | 0.327 ppb             | 29,640 cps        | 2.3 %         |
| 140Ce (KED) | 0.696 ppb             | 84,261 cps        | 1.1 %         |
| 141Pr (KED) | 0.081 ppb             | 9,935 cps         | 2.5 %         |
| 142Nd (KED) | 0.442 ppb             | 21,756 cps        | 4.3 %         |
| 152Sm (KED) | 0.062 ppb             | 2,675 cps         | 4.1 %         |
| 153Eu (KED) | 0.012 ppb             | 1,014 cps         | 7.7 %         |
| 158Gd (KED) | 0.055 ppb             | 3,248 cps         | 2.6 %         |
| 159Tb (KED) | 97.126 %              | 4,186,378 cps     | 1.6 %         |
| 164Dy (KED) | 0.041 ppb             | 2,657 cps         | 7.5 %         |
| 166Er (KED) | 0.018 ppb             | 1,689 cps         | 3.2 %         |
| 169Tm (KED) | 0.003 ppb             | 661 cps           | 7.7 %         |
| 174Yb (KED) | 0.017 ppb             | 1,557 cps         | 0.6 %         |
| 175Lu (KED) | -0.022 ppb            | 14,235 cps        | 1.7 %         |
| 205Tl (KED) | 0.006 ppb             | 993 cps           | 4.3 %         |
| 208Pb (KED) | 0.532 ppb             | 66,513 cps        | 1.6 %         |
| 209Bi (KED) | 89.977 %              | 3,175,957 cps     | 2.6 %         |
| 232Th (KED) | 0.099 ppb             | 23,744 cps        | 1.6 %         |
| 238U (KED)  | 0.018 ppb             | 4,939 cps         | 3.1 %         |

## Sample Summary

Instrument ID: iCAP Q

Analysis index: 23

Analysis name: 315047603860505

Analysis started at: 11/4/2021 3:55:22 PM

User name: WINDOWS-UPCI4ER\Administrator

| Category    | Concentration average | Concentration RSD |
|-------------|-----------------------|-------------------|
| 6Li (KED)   | 116.211 %             | 5.0 %             |
| 9Be (KED)   | 0.017 ppb             | 158.7 %           |
| 11B (KED)   | -7.575 ppb            | 2.5 %             |
| 24Mg (KED)  | 219.405 ppb           | 4.1 %             |
| 27Al (KED)  | 2,366.516 ppb         | 45.3 %            |
| 45Sc (KED)  | 114.404 %             | 2.2 %             |
| 51V (KED)   | 0.928 ppb             | 9.3 %             |
| 52Cr (KED)  | 1.787 ppb             | 12.2 %            |
| 55Mn (KED)  | 7.421 ppb             | 1.2 %             |
| 56Fe (KED)  | 384.403 ppb           | 2.1 %             |
| 58Ni (KED)  | 1.858 ppb             | 1.0 %             |
| 59Co (KED)  | 0.188 ppb             | 2.3 %             |
| 63Cu (KED)  | 1.898 ppb             | 2.7 %             |
| 64Zn (KED)  | 56.245 ppb            | 0.7 %             |
| 69Ga (KED)  | 1.470 ppb             | 1.5 %             |
| 75As (KED)  | 0.290 ppb             | 7.3 %             |
| 80Se (KED)  | 0.156 ppb             | 57.3 %            |
| 85Rb (KED)  | 1.131 ppb             | 3.8 %             |
| 88Sr (KED)  | 4.787 ppb             | 1.4 %             |
| 89Y (KED)   | 107.799 %             | 2.6 %             |
| 107Ag (KED) | 0.008 ppb             | 8.5 %             |
| 114Cd (KED) | 0.013 ppb             | 16.9 %            |
| 115In (KED) | 103.740 %             | 0.6 %             |
| 133Cs (KED) | 0.064 ppb             | 4.2 %             |
| 138Ba (KED) | 4.244 ppb             | 1.4 %             |
| 139La (KED) | 0.327 ppb             | 2.5 %             |
| 140Ce (KED) | 0.674 ppb             | 1.2 %             |
| 141Pr (KED) | 0.080 ppb             | 0.8 %             |
| 142Nd (KED) | 0.431 ppb             | 3.0 %             |
| 152Sm (KED) | 0.061 ppb             | 6.2 %             |
| 153Eu (KED) | 0.012 ppb             | 3.7 %             |
| 158Gd (KED) | 0.052 ppb             | 0.4 %             |
| 159Tb (KED) | 105.062 %             | 2.3 %             |
| 164Dy (KED) | 0.039 ppb             | 0.5 %             |
| 166Er (KED) | 0.019 ppb             | 4.2 %             |
| 169Tm (KED) | 0.003 ppb             | 7.0 %             |
| 174Yb (KED) | 0.017 ppb             | 2.7 %             |
| 175Lu (KED) | -0.022 ppb            | 6.0 %             |
| 205Tl (KED) | 0.006 ppb             | 8.6 %             |
| 208Pb (KED) | 0.510 ppb             | 2.9 %             |
| 209Bi (KED) | 96.425 %              | 0.8 %             |
| 232Th (KED) | 0.087 ppb             | 2.2 %             |
| 238U (KED)  | 0.022 ppb             | 10.2 %            |

| Category   | Concentration average | Intensity average | Intensity RSD |
|------------|-----------------------|-------------------|---------------|
| 6Li (KED)  | 116.211 %             | 3,434 cps         | 5.0 %         |
| 9Be (KED)  | 0.017 ppb             | 4 cps             | 114.6 %       |
| 11B (KED)  | -7.575 ppb            | 266 cps           | 6.9 %         |
| 24Mg (KED) | 219.405 ppb           | 152,128 cps       | 1.7 %         |
| 27Al (KED) | 2,366.516 ppb         | 396,912 cps       | 47.1 %        |

# Comprehensive

11/4/2021 4:56:04 PM

| Category    | Concentration average | Intensity average | Intensity RSD |
|-------------|-----------------------|-------------------|---------------|
| 45Sc (KED)  | 114.404 %             | 61,806 cps        | 2.2 %         |
| 51V (KED)   | 0.928 ppb             | 10,389 cps        | 11.4 %        |
| 52Cr (KED)  | 1.787 ppb             | 31,557 cps        | 14.2 %        |
| 55Mn (KED)  | 7.421 ppb             | 62,058 cps        | 2.5 %         |
| 56Fe (KED)  | 384.403 ppb           | 5,948,891 cps     | 4.1 %         |
| 58Ni (KED)  | 1.858 ppb             | 37,958 cps        | 2.2 %         |
| 59Co (KED)  | 0.188 ppb             | 6,248 cps         | 3.3 %         |
| 63Cu (KED)  | 1.898 ppb             | 45,988 cps        | 1.6 %         |
| 64Zn (KED)  | 56.245 ppb            | 343,301 cps       | 2.1 %         |
| 69Ga (KED)  | 1.470 ppb             | 11,217 cps        | 3.1 %         |
| 75As (KED)  | 0.290 ppb             | 517 cps           | 7.2 %         |
| 80Se (KED)  | 0.156 ppb             | 1,540 cps         | 5.0 %         |
| 85Rb (KED)  | 1.131 ppb             | 7,550 cps         | 3.0 %         |
| 88Sr (KED)  | 4.787 ppb             | 44,600 cps        | 1.7 %         |
| 89Y (KED)   | 107.799 %             | 502,417 cps       | 2.6 %         |
| 107Ag (KED) | 0.008 ppb             | 503 cps           | 8.1 %         |
| 114Cd (KED) | 0.013 ppb             | 317 cps           | 15.6 %        |
| 115In (KED) | 103.740 %             | 860,883 cps       | 0.6 %         |
| 133Cs (KED) | 0.064 ppb             | 2,021 cps         | 4.2 %         |
| 138Ba (KED) | 4.244 ppb             | 190,011 cps       | 0.9 %         |
| 139La (KED) | 0.327 ppb             | 32,098 cps        | 4.2 %         |
| 140Ce (KED) | 0.674 ppb             | 88,335 cps        | 3.4 %         |
| 141Pr (KED) | 0.080 ppb             | 10,560 cps        | 1.4 %         |
| 142Nd (KED) | 0.431 ppb             | 22,949 cps        | 4.2 %         |
| 152Sm (KED) | 0.061 ppb             | 2,801 cps         | 4.0 %         |
| 153Eu (KED) | 0.012 ppb             | 1,152 cps         | 5.0 %         |
| 158Gd (KED) | 0.052 ppb             | 3,312 cps         | 2.6 %         |
| 159Tb (KED) | 105.062 %             | 4,528,428 cps     | 2.3 %         |
| 164Dy (KED) | 0.039 ppb             | 2,748 cps         | 1.8 %         |
| 166Er (KED) | 0.019 ppb             | 1,867 cps         | 1.5 %         |
| 169Tm (KED) | 0.003 ppb             | 810 cps           | 5.8 %         |
| 174Yb (KED) | 0.017 ppb             | 1,706 cps         | 2.1 %         |
| 175Lu (KED) | -0.022 ppb            | 15,479 cps        | 3.5 %         |
| 205Tl (KED) | 0.006 ppb             | 1,064 cps         | 7.8 %         |
| 208Pb (KED) | 0.510 ppb             | 68,506 cps        | 2.4 %         |
| 209Bi (KED) | 96.425 %              | 3,403,542 cps     | 0.8 %         |
| 232Th (KED) | 0.087 ppb             | 22,361 cps        | 2.1 %         |
| 238U (KED)  | 0.022 ppb             | 6,242 cps         | 9.8 %         |

## Sample Summary

Instrument ID: iCAP Q

Analysis index: 24

Analysis name: 315047603860452 jian

Analysis started at: 11/4/2021 3:58:47 PM

User name: WINDOWS-UPCI4ER\Administrator

| Category    | Concentration average | Concentration RSD |
|-------------|-----------------------|-------------------|
| 6Li (KED)   | 117.076 %             | 3.3 %             |
| 9Be (KED)   | 0.005 ppb             | 215.6 %           |
| 11B (KED)   | -7.940 ppb            | 2.2 %             |
| 24Mg (KED)  | 199.732 ppb           | 2.5 %             |
| 27Al (KED)  | 301.978 ppb           | 1.4 %             |
| 45Sc (KED)  | 109.223 %             | 1.1 %             |
| 51V (KED)   | 0.607 ppb             | 2.4 %             |
| 52Cr (KED)  | 0.935 ppb             | 3.2 %             |
| 55Mn (KED)  | 6.310 ppb             | 1.7 %             |
| 56Fe (KED)  | 300.370 ppb           | 2.1 %             |
| 58Ni (KED)  | 1.403 ppb             | 2.0 %             |
| 59Co (KED)  | 0.135 ppb             | 2.0 %             |
| 63Cu (KED)  | 2.281 ppb             | 0.4 %             |
| 64Zn (KED)  | 53.119 ppb            | 0.3 %             |
| 69Ga (KED)  | 1.267 ppb             | 4.3 %             |
| 75As (KED)  | 0.305 ppb             | 2.2 %             |
| 80Se (KED)  | 0.342 ppb             | 50.4 %            |
| 85Rb (KED)  | 1.470 ppb             | 2.4 %             |
| 88Sr (KED)  | 2.811 ppb             | 0.4 %             |
| 89Y (KED)   | 102.250 %             | 0.9 %             |
| 107Ag (KED) | 0.011 ppb             | 7.8 %             |
| 114Cd (KED) | 0.015 ppb             | 1.6 %             |
| 115In (KED) | 96.927 %              | 0.4 %             |
| 133Cs (KED) | 0.059 ppb             | 3.2 %             |
| 138Ba (KED) | 3.721 ppb             | 1.0 %             |
| 139La (KED) | 0.245 ppb             | 0.4 %             |
| 140Ce (KED) | 0.515 ppb             | 0.1 %             |
| 141Pr (KED) | 0.061 ppb             | 2.8 %             |
| 142Nd (KED) | 0.330 ppb             | 1.5 %             |
| 152Sm (KED) | 0.047 ppb             | 3.0 %             |
| 153Eu (KED) | 0.009 ppb             | 9.3 %             |
| 158Gd (KED) | 0.040 ppb             | 5.1 %             |
| 159Tb (KED) | 99.042 %              | 0.9 %             |
| 164Dy (KED) | 0.030 ppb             | 5.7 %             |
| 166Er (KED) | 0.014 ppb             | 6.9 %             |
| 169Tm (KED) | 0.002 ppb             | 6.7 %             |
| 174Yb (KED) | 0.013 ppb             | 5.4 %             |
| 175Lu (KED) | -0.024 ppb            | 7.3 %             |
| 205Tl (KED) | 0.005 ppb             | 3.8 %             |
| 208Pb (KED) | 0.453 ppb             | 2.7 %             |
| 209Bi (KED) | 92.456 %              | 1.8 %             |
| 232Th (KED) | 0.067 ppb             | 3.6 %             |
| 238U (KED)  | 0.014 ppb             | 0.3 %             |

| Category   | Concentration average | Intensity average | Intensity RSD |
|------------|-----------------------|-------------------|---------------|
| 6Li (KED)  | 117.076 %             | 3,459 cps         | 3.3 %         |
| 9Be (KED)  | 0.005 ppb             | 2 cps             | 86.6 %        |
| 11B (KED)  | -7.940 ppb            | 233 cps           | 8.0 %         |
| 24Mg (KED) | 199.732 ppb           | 139,646 cps       | 1.0 %         |
| 27Al (KED) | 301.978 ppb           | 48,145 cps        | 0.4 %         |

# Comprehensive

11/4/2021 4:56:04 PM

| Category    | Concentration average | Intensity average | Intensity RSD |
|-------------|-----------------------|-------------------|---------------|
| 45Sc (KED)  | 109.223 %             | 59,007 cps        | 1.1 %         |
| 51V (KED)   | 0.607 ppb             | 6,484 cps         | 1.6 %         |
| 52Cr (KED)  | 0.935 ppb             | 15,786 cps        | 2.5 %         |
| 55Mn (KED)  | 6.310 ppb             | 50,378 cps        | 1.1 %         |
| 56Fe (KED)  | 300.370 ppb           | 4,436,702 cps     | 1.3 %         |
| 58Ni (KED)  | 1.403 ppb             | 27,457 cps        | 0.9 %         |
| 59Co (KED)  | 0.135 ppb             | 4,293 cps         | 2.2 %         |
| 63Cu (KED)  | 2.281 ppb             | 52,323 cps        | 0.7 %         |
| 64Zn (KED)  | 53.119 ppb            | 307,770 cps       | 0.7 %         |
| 69Ga (KED)  | 1.267 ppb             | 9,187 cps         | 5.1 %         |
| 75As (KED)  | 0.305 ppb             | 514 cps           | 2.0 %         |
| 80Se (KED)  | 0.342 ppb             | 1,550 cps         | 5.4 %         |
| 85Rb (KED)  | 1.470 ppb             | 9,292 cps         | 3.0 %         |
| 88Sr (KED)  | 2.811 ppb             | 24,898 cps        | 0.6 %         |
| 89Y (KED)   | 102.250 %             | 476,557 cps       | 0.9 %         |
| 107Ag (KED) | 0.011 ppb             | 628 cps           | 8.0 %         |
| 114Cd (KED) | 0.015 ppb             | 334 cps           | 1.2 %         |
| 115In (KED) | 96.927 %              | 804,348 cps       | 0.4 %         |
| 133Cs (KED) | 0.059 ppb             | 1,746 cps         | 2.8 %         |
| 138Ba (KED) | 3.721 ppb             | 157,260 cps       | 1.6 %         |
| 139La (KED) | 0.245 ppb             | 22,693 cps        | 0.6 %         |
| 140Ce (KED) | 0.515 ppb             | 63,637 cps        | 1.0 %         |
| 141Pr (KED) | 0.061 ppb             | 7,578 cps         | 3.3 %         |
| 142Nd (KED) | 0.330 ppb             | 16,559 cps        | 1.8 %         |
| 152Sm (KED) | 0.047 ppb             | 2,048 cps         | 2.1 %         |
| 153Eu (KED) | 0.009 ppb             | 842 cps           | 9.9 %         |
| 158Gd (KED) | 0.040 ppb             | 2,408 cps         | 4.2 %         |
| 159Tb (KED) | 99.042 %              | 4,268,961 cps     | 0.9 %         |
| 164Dy (KED) | 0.030 ppb             | 2,005 cps         | 6.5 %         |
| 166Er (KED) | 0.014 ppb             | 1,427 cps         | 5.9 %         |
| 169Tm (KED) | 0.002 ppb             | 620 cps           | 6.1 %         |
| 174Yb (KED) | 0.013 ppb             | 1,202 cps         | 6.2 %         |
| 175Lu (KED) | -0.024 ppb            | 14,237 cps        | 2.4 %         |
| 205Tl (KED) | 0.005 ppb             | 928 cps           | 3.9 %         |
| 208Pb (KED) | 0.453 ppb             | 58,789 cps        | 0.9 %         |
| 209Bi (KED) | 92.456 %              | 3,263,444 cps     | 1.8 %         |
| 232Th (KED) | 0.067 ppb             | 16,527 cps        | 3.9 %         |
| 238U (KED)  | 0.014 ppb             | 3,983 cps         | 1.7 %         |

## Sample Summary

Instrument ID: iCAP Q

Analysis index: 25

Analysis name: 315047603860504

Analysis started at: 11/4/2021 4:02:01 PM

User name: WINDOWS-UPCI4ER\Administrator

| Category    | Concentration average | Concentration RSD |
|-------------|-----------------------|-------------------|
| 6Li (KED)   | 110.231 %             | 5.6 %             |
| 9Be (KED)   | -0.001 ppb            | 1,132.7 %         |
| 11B (KED)   | -6.813 ppb            | 5.1 %             |
| 24Mg (KED)  | 246.469 ppb           | 6.1 %             |
| 27Al (KED)  | 272.470 ppb           | 1.2 %             |
| 45Sc (KED)  | 108.270 %             | 2.0 %             |
| 51V (KED)   | 0.550 ppb             | 2.6 %             |
| 52Cr (KED)  | 0.767 ppb             | 2.3 %             |
| 55Mn (KED)  | 7.913 ppb             | 0.6 %             |
| 56Fe (KED)  | 284.759 ppb           | 1.0 %             |
| 58Ni (KED)  | 1.321 ppb             | 1.1 %             |
| 59Co (KED)  | 0.186 ppb             | 3.1 %             |
| 63Cu (KED)  | 2.280 ppb             | 0.1 %             |
| 64Zn (KED)  | 61.127 ppb            | 1.4 %             |
| 69Ga (KED)  | 1.388 ppb             | 1.9 %             |
| 75As (KED)  | 0.308 ppb             | 10.2 %            |
| 80Se (KED)  | 0.270 ppb             | 42.0 %            |
| 85Rb (KED)  | 0.855 ppb             | 4.1 %             |
| 88Sr (KED)  | 5.606 ppb             | 4.2 %             |
| 89Y (KED)   | 101.657 %             | 0.7 %             |
| 107Ag (KED) | 0.017 ppb             | 4.8 %             |
| 114Cd (KED) | 0.019 ppb             | 7.6 %             |
| 115In (KED) | 96.642 %              | 1.4 %             |
| 133Cs (KED) | 0.052 ppb             | 7.4 %             |
| 138Ba (KED) | 4.321 ppb             | 0.8 %             |
| 139La (KED) | 0.254 ppb             | 1.5 %             |
| 140Ce (KED) | 0.532 ppb             | 0.9 %             |
| 141Pr (KED) | 0.061 ppb             | 3.5 %             |
| 142Nd (KED) | 0.332 ppb             | 0.4 %             |
| 152Sm (KED) | 0.048 ppb             | 0.5 %             |
| 153Eu (KED) | 0.010 ppb             | 2.4 %             |
| 158Gd (KED) | 0.043 ppb             | 3.1 %             |
| 159Tb (KED) | 99.089 %              | 1.9 %             |
| 164Dy (KED) | 0.032 ppb             | 7.3 %             |
| 166Er (KED) | 0.015 ppb             | 6.8 %             |
| 169Tm (KED) | 0.002 ppb             | 4.2 %             |
| 174Yb (KED) | 0.013 ppb             | 5.2 %             |
| 175Lu (KED) | -0.021 ppb            | 8.5 %             |
| 205Tl (KED) | 0.005 ppb             | 8.1 %             |
| 208Pb (KED) | 0.341 ppb             | 3.8 %             |
| 209Bi (KED) | 93.342 %              | 1.8 %             |
| 232Th (KED) | 0.067 ppb             | 2.6 %             |
| 238U (KED)  | 0.016 ppb             | 3.3 %             |

| Category   | Concentration average | Intensity average | Intensity RSD |
|------------|-----------------------|-------------------|---------------|
| 6Li (KED)  | 110.231 %             | 3,257 cps         | 5.6 %         |
| 9Be (KED)  | -0.001 ppb            | 1 cps             | 173.2 %       |
| 11B (KED)  | -6.813 ppb            | 320 cps           | 12.6 %        |
| 24Mg (KED) | 246.469 ppb           | 161,925 cps       | 1.3 %         |
| 27Al (KED) | 272.470 ppb           | 43,072 cps        | 1.3 %         |

# Comprehensive

11/4/2021 4:56:04 PM

| Category    | Concentration average | Intensity average | Intensity RSD |
|-------------|-----------------------|-------------------|---------------|
| 45Sc (KED)  | 108.270 %             | 58,492 cps        | 2.0 %         |
| 51V (KED)   | 0.550 ppb             | 5,824 cps         | 3.9 %         |
| 52Cr (KED)  | 0.767 ppb             | 12,854 cps        | 0.8 %         |
| 55Mn (KED)  | 7.913 ppb             | 62,612 cps        | 1.5 %         |
| 56Fe (KED)  | 284.759 ppb           | 4,169,587 cps     | 1.1 %         |
| 58Ni (KED)  | 1.321 ppb             | 25,655 cps        | 1.3 %         |
| 59Co (KED)  | 0.186 ppb             | 5,855 cps         | 2.4 %         |
| 63Cu (KED)  | 2.280 ppb             | 51,983 cps        | 0.6 %         |
| 64Zn (KED)  | 61.127 ppb            | 351,530 cps       | 0.7 %         |
| 69Ga (KED)  | 1.388 ppb             | 9,995 cps         | 1.2 %         |
| 75As (KED)  | 0.308 ppb             | 517 cps           | 9.3 %         |
| 80Se (KED)  | 0.270 ppb             | 1,507 cps         | 3.6 %         |
| 85Rb (KED)  | 0.855 ppb             | 5,407 cps         | 4.6 %         |
| 88Sr (KED)  | 5.606 ppb             | 49,235 cps        | 3.7 %         |
| 89Y (KED)   | 101.657 %             | 473,791 cps       | 0.7 %         |
| 107Ag (KED) | 0.017 ppb             | 963 cps           | 5.8 %         |
| 114Cd (KED) | 0.019 ppb             | 398 cps           | 7.2 %         |
| 115In (KED) | 96.642 %              | 801,981 cps       | 1.4 %         |
| 133Cs (KED) | 0.052 ppb             | 1,540 cps         | 7.5 %         |
| 138Ba (KED) | 4.321 ppb             | 182,465 cps       | 1.3 %         |
| 139La (KED) | 0.254 ppb             | 23,520 cps        | 2.0 %         |
| 140Ce (KED) | 0.532 ppb             | 65,803 cps        | 1.6 %         |
| 141Pr (KED) | 0.061 ppb             | 7,662 cps         | 4.0 %         |
| 142Nd (KED) | 0.332 ppb             | 16,658 cps        | 2.0 %         |
| 152Sm (KED) | 0.048 ppb             | 2,107 cps         | 1.4 %         |
| 153Eu (KED) | 0.010 ppb             | 857 cps           | 3.7 %         |
| 158Gd (KED) | 0.043 ppb             | 2,570 cps         | 4.6 %         |
| 159Tb (KED) | 99.089 %              | 4,270,975 cps     | 1.9 %         |
| 164Dy (KED) | 0.032 ppb             | 2,120 cps         | 6.0 %         |
| 166Er (KED) | 0.015 ppb             | 1,459 cps         | 3.9 %         |
| 169Tm (KED) | 0.002 ppb             | 609 cps           | 5.0 %         |
| 174Yb (KED) | 0.013 ppb             | 1,199 cps         | 3.6 %         |
| 175Lu (KED) | -0.021 ppb            | 14,775 cps        | 0.3 %         |
| 205Tl (KED) | 0.005 ppb             | 820 cps           | 6.3 %         |
| 208Pb (KED) | 0.341 ppb             | 45,682 cps        | 3.4 %         |
| 209Bi (KED) | 93.342 %              | 3,294,743 cps     | 1.8 %         |
| 232Th (KED) | 0.067 ppb             | 16,619 cps        | 1.0 %         |
| 238U (KED)  | 0.016 ppb             | 4,585 cps         | 2.0 %         |

## Sample Summary

Instrument ID: iCAP Q

Analysis index: 26

Analysis name: 315047603860520jian

Analysis started at: 11/4/2021 4:05:13 PM

User name: WINDOWS-UPCI4ER\Administrator

| Category    | Concentration average | Concentration RSD |
|-------------|-----------------------|-------------------|
| 6Li (KED)   | 113.315 %             | 3.5 %             |
| 9Be (KED)   | 0.011 ppb             | 163.1 %           |
| 11B (KED)   | -6.244 ppb            | 5.0 %             |
| 24Mg (KED)  | 224.249 ppb           | 3.7 %             |
| 27Al (KED)  | 372.396 ppb           | 2.2 %             |
| 45Sc (KED)  | 105.628 %             | 1.5 %             |
| 51V (KED)   | 0.740 ppb             | 0.8 %             |
| 52Cr (KED)  | 1.091 ppb             | 1.7 %             |
| 55Mn (KED)  | 7.819 ppb             | 2.2 %             |
| 56Fe (KED)  | 364.647 ppb           | 1.6 %             |
| 58Ni (KED)  | 1.531 ppb             | 2.0 %             |
| 59Co (KED)  | 0.168 ppb             | 2.4 %             |
| 63Cu (KED)  | 2.143 ppb             | 1.8 %             |
| 64Zn (KED)  | 64.453 ppb            | 2.6 %             |
| 69Ga (KED)  | 1.305 ppb             | 3.5 %             |
| 75As (KED)  | 0.378 ppb             | 3.2 %             |
| 80Se (KED)  | 0.192 ppb             | 59.2 %            |
| 85Rb (KED)  | 0.860 ppb             | 3.0 %             |
| 88Sr (KED)  | 3.095 ppb             | 1.4 %             |
| 89Y (KED)   | 100.959 %             | 2.0 %             |
| 107Ag (KED) | 0.025 ppb             | 2.4 %             |
| 114Cd (KED) | 0.019 ppb             | 8.9 %             |
| 115In (KED) | 95.293 %              | 1.2 %             |
| 133Cs (KED) | 0.073 ppb             | 3.7 %             |
| 138Ba (KED) | 4.015 ppb             | 2.7 %             |
| 139La (KED) | 0.289 ppb             | 4.4 %             |
| 140Ce (KED) | 0.589 ppb             | 3.6 %             |
| 141Pr (KED) | 0.070 ppb             | 4.6 %             |
| 142Nd (KED) | 0.370 ppb             | 4.5 %             |
| 152Sm (KED) | 0.054 ppb             | 7.8 %             |
| 153Eu (KED) | 0.010 ppb             | 10.8 %            |
| 158Gd (KED) | 0.048 ppb             | 3.0 %             |
| 159Tb (KED) | 97.093 %              | 3.6 %             |
| 164Dy (KED) | 0.036 ppb             | 3.5 %             |
| 166Er (KED) | 0.017 ppb             | 2.4 %             |
| 169Tm (KED) | 0.002 ppb             | 9.2 %             |
| 174Yb (KED) | 0.016 ppb             | 1.9 %             |
| 175Lu (KED) | -0.023 ppb            | 20.1 %            |
| 205Tl (KED) | 0.006 ppb             | 5.0 %             |
| 208Pb (KED) | 0.464 ppb             | 3.4 %             |
| 209Bi (KED) | 91.649 %              | 1.6 %             |
| 232Th (KED) | 0.080 ppb             | 3.2 %             |
| 238U (KED)  | 0.015 ppb             | 0.4 %             |

| Category   | Concentration average | Intensity average | Intensity RSD |
|------------|-----------------------|-------------------|---------------|
| 6Li (KED)  | 113.315 %             | 3,348 cps         | 3.5 %         |
| 9Be (KED)  | 0.011 ppb             | 3 cps             | 100.0 %       |
| 11B (KED)  | -6.244 ppb            | 380 cps           | 4.9 %         |
| 24Mg (KED) | 224.249 ppb           | 151,684 cps       | 1.2 %         |
| 27Al (KED) | 372.396 ppb           | 57,388 cps        | 1.5 %         |

# Comprehensive

11/4/2021 4:56:04 PM

| Category    | Concentration average | Intensity average | Intensity RSD |
|-------------|-----------------------|-------------------|---------------|
| 45Sc (KED)  | 105.628 %             | 57,065 cps        | 1.5 %         |
| 51V (KED)   | 0.740 ppb             | 7,638 cps         | 1.1 %         |
| 52Cr (KED)  | 1.091 ppb             | 17,789 cps        | 2.3 %         |
| 55Mn (KED)  | 7.819 ppb             | 60,366 cps        | 2.4 %         |
| 56Fe (KED)  | 364.647 ppb           | 5,208,322 cps     | 0.6 %         |
| 58Ni (KED)  | 1.531 ppb             | 28,941 cps        | 0.9 %         |
| 59Co (KED)  | 0.168 ppb             | 5,153 cps         | 1.0 %         |
| 63Cu (KED)  | 2.143 ppb             | 48,559 cps        | 0.3 %         |
| 64Zn (KED)  | 64.453 ppb            | 367,815 cps       | 0.9 %         |
| 69Ga (KED)  | 1.305 ppb             | 9,336 cps         | 1.7 %         |
| 75As (KED)  | 0.378 ppb             | 627 cps           | 1.4 %         |
| 80Se (KED)  | 0.192 ppb             | 1,459 cps         | 3.3 %         |
| 85Rb (KED)  | 0.860 ppb             | 5,403 cps         | 5.0 %         |
| 88Sr (KED)  | 3.095 ppb             | 27,054 cps        | 2.1 %         |
| 89Y (KED)   | 100.959 %             | 470,539 cps       | 2.0 %         |
| 107Ag (KED) | 0.025 ppb             | 1,391 cps         | 1.2 %         |
| 114Cd (KED) | 0.019 ppb             | 406 cps           | 9.3 %         |
| 115In (KED) | 95.293 %              | 790,789 cps       | 1.2 %         |
| 133Cs (KED) | 0.073 ppb             | 2,121 cps         | 4.0 %         |
| 138Ba (KED) | 4.015 ppb             | 166,145 cps       | 1.0 %         |
| 139La (KED) | 0.289 ppb             | 26,114 cps        | 1.0 %         |
| 140Ce (KED) | 0.589 ppb             | 71,303 cps        | 1.5 %         |
| 141Pr (KED) | 0.070 ppb             | 8,513 cps         | 1.0 %         |
| 142Nd (KED) | 0.370 ppb             | 18,208 cps        | 3.7 %         |
| 152Sm (KED) | 0.054 ppb             | 2,311 cps         | 6.1 %         |
| 153Eu (KED) | 0.010 ppb             | 896 cps           | 7.2 %         |
| 158Gd (KED) | 0.048 ppb             | 2,824 cps         | 1.7 %         |
| 159Tb (KED) | 97.093 %              | 4,184,918 cps     | 3.6 %         |
| 164Dy (KED) | 0.036 ppb             | 2,318 cps         | 6.7 %         |
| 166Er (KED) | 0.017 ppb             | 1,583 cps         | 3.3 %         |
| 169Tm (KED) | 0.002 ppb             | 620 cps           | 12.1 %        |
| 174Yb (KED) | 0.016 ppb             | 1,408 cps         | 3.0 %         |
| 175Lu (KED) | -0.023 ppb            | 14,130 cps        | 1.8 %         |
| 205Tl (KED) | 0.006 ppb             | 958 cps           | 6.5 %         |
| 208Pb (KED) | 0.464 ppb             | 59,684 cps        | 2.3 %         |
| 209Bi (KED) | 91.649 %              | 3,234,968 cps     | 1.6 %         |
| 232Th (KED) | 0.080 ppb             | 19,460 cps        | 2.5 %         |
| 238U (KED)  | 0.015 ppb             | 4,080 cps         | 2.0 %         |

## Sample Summary

Instrument ID: iCAP Q

Analysis index: 27

Analysis name: 315047603860508jian

Analysis started at: 11/4/2021 4:08:24 PM

User name: WINDOWS-UPCI4ER\Administrator

| Category    | Concentration average | Concentration RSD |
|-------------|-----------------------|-------------------|
| 6Li (KED)   | 107.221 %             | 1.7 %             |
| 9Be (KED)   | -0.007 ppb            | 0.0 %             |
| 11B (KED)   | -0.105 ppb            | 105.6 %           |
| 24Mg (KED)  | 170.302 ppb           | 2.8 %             |
| 27Al (KED)  | 261.838 ppb           | 1.6 %             |
| 45Sc (KED)  | 105.295 %             | 1.0 %             |
| 51V (KED)   | 0.482 ppb             | 1.3 %             |
| 52Cr (KED)  | 1.036 ppb             | 2.4 %             |
| 55Mn (KED)  | 6.812 ppb             | 2.2 %             |
| 56Fe (KED)  | 245.499 ppb           | 1.7 %             |
| 58Ni (KED)  | 1.290 ppb             | 0.6 %             |
| 59Co (KED)  | 0.122 ppb             | 2.2 %             |
| 63Cu (KED)  | 4.760 ppb             | 1.6 %             |
| 64Zn (KED)  | 60.789 ppb            | 1.0 %             |
| 69Ga (KED)  | 1.806 ppb             | 0.4 %             |
| 75As (KED)  | 0.307 ppb             | 6.0 %             |
| 80Se (KED)  | 0.138 ppb             | 29.1 %            |
| 85Rb (KED)  | 0.620 ppb             | 1.7 %             |
| 88Sr (KED)  | 2.851 ppb             | 2.7 %             |
| 89Y (KED)   | 102.275 %             | 0.5 %             |
| 107Ag (KED) | 0.017 ppb             | 9.8 %             |
| 114Cd (KED) | 0.020 ppb             | 7.3 %             |
| 115In (KED) | 96.759 %              | 1.5 %             |
| 133Cs (KED) | 0.053 ppb             | 3.6 %             |
| 138Ba (KED) | 5.776 ppb             | 2.9 %             |
| 139La (KED) | 0.199 ppb             | 3.0 %             |
| 140Ce (KED) | 0.415 ppb             | 2.8 %             |
| 141Pr (KED) | 0.048 ppb             | 2.2 %             |
| 142Nd (KED) | 0.265 ppb             | 2.8 %             |
| 152Sm (KED) | 0.038 ppb             | 8.1 %             |
| 153Eu (KED) | 0.008 ppb             | 7.1 %             |
| 158Gd (KED) | 0.033 ppb             | 1.4 %             |
| 159Tb (KED) | 99.838 %              | 2.4 %             |
| 164Dy (KED) | 0.026 ppb             | 8.6 %             |
| 166Er (KED) | 0.012 ppb             | 5.0 %             |
| 169Tm (KED) | 0.002 ppb             | 7.6 %             |
| 174Yb (KED) | 0.011 ppb             | 1.1 %             |
| 175Lu (KED) | -0.024 ppb            | 12.6 %            |
| 205Tl (KED) | 0.004 ppb             | 7.1 %             |
| 208Pb (KED) | 0.669 ppb             | 0.9 %             |
| 209Bi (KED) | 92.804 %              | 0.7 %             |
| 232Th (KED) | 0.060 ppb             | 1.9 %             |
| 238U (KED)  | 0.013 ppb             | 5.9 %             |

| Category   | Concentration average | Intensity average | Intensity RSD |
|------------|-----------------------|-------------------|---------------|
| 6Li (KED)  | 107.221 %             | 3,168 cps         | 1.7 %         |
| 9Be (KED)  | -0.007 ppb            | 0 cps             |               |
| 11B (KED)  | -0.105 ppb            | 890 cps           | 2.6 %         |
| 24Mg (KED) | 170.302 ppb           | 109,103 cps       | 1.1 %         |
| 27Al (KED) | 261.838 ppb           | 40,259 cps        | 0.6 %         |

# Comprehensive

11/4/2021 4:56:04 PM

| Category    | Concentration average | Intensity average | Intensity RSD |
|-------------|-----------------------|-------------------|---------------|
| 45Sc (KED)  | 105.295 %             | 56,885 cps        | 1.0 %         |
| 51V (KED)   | 0.482 ppb             | 4,960 cps         | 2.2 %         |
| 52Cr (KED)  | 1.036 ppb             | 16,853 cps        | 2.0 %         |
| 55Mn (KED)  | 6.812 ppb             | 52,428 cps        | 1.4 %         |
| 56Fe (KED)  | 245.499 ppb           | 3,496,355 cps     | 0.8 %         |
| 58Ni (KED)  | 1.290 ppb             | 24,374 cps        | 1.0 %         |
| 59Co (KED)  | 0.122 ppb             | 3,762 cps         | 1.7 %         |
| 63Cu (KED)  | 4.760 ppb             | 108,593 cps       | 1.4 %         |
| 64Zn (KED)  | 60.789 ppb            | 351,746 cps       | 0.7 %         |
| 69Ga (KED)  | 1.806 ppb             | 13,056 cps        | 0.6 %         |
| 75As (KED)  | 0.307 ppb             | 518 cps           | 5.8 %         |
| 80Se (KED)  | 0.138 ppb             | 1,452 cps         | 1.8 %         |
| 85Rb (KED)  | 0.620 ppb             | 3,972 cps         | 2.1 %         |
| 88Sr (KED)  | 2.851 ppb             | 25,257 cps        | 2.2 %         |
| 89Y (KED)   | 102.275 %             | 476,672 cps       | 0.5 %         |
| 107Ag (KED) | 0.017 ppb             | 963 cps           | 8.4 %         |
| 114Cd (KED) | 0.020 ppb             | 427 cps           | 6.2 %         |
| 115In (KED) | 96.759 %              | 802,949 cps       | 1.5 %         |
| 133Cs (KED) | 0.053 ppb             | 1,562 cps         | 3.3 %         |
| 138Ba (KED) | 5.776 ppb             | 245,149 cps       | 1.4 %         |
| 139La (KED) | 0.199 ppb             | 18,524 cps        | 0.7 %         |
| 140Ce (KED) | 0.415 ppb             | 51,752 cps        | 0.3 %         |
| 141Pr (KED) | 0.048 ppb             | 6,015 cps         | 3.7 %         |
| 142Nd (KED) | 0.265 ppb             | 13,434 cps        | 1.3 %         |
| 152Sm (KED) | 0.038 ppb             | 1,691 cps         | 5.8 %         |
| 153Eu (KED) | 0.008 ppb             | 680 cps           | 5.0 %         |
| 158Gd (KED) | 0.033 ppb             | 2,011 cps         | 2.5 %         |
| 159Tb (KED) | 99.838 %              | 4,303,245 cps     | 2.4 %         |
| 164Dy (KED) | 0.026 ppb             | 1,732 cps         | 6.0 %         |
| 166Er (KED) | 0.012 ppb             | 1,216 cps         | 3.5 %         |
| 169Tm (KED) | 0.002 ppb             | 487 cps           | 5.2 %         |
| 174Yb (KED) | 0.011 ppb             | 1,037 cps         | 3.2 %         |
| 175Lu (KED) | -0.024 ppb            | 14,394 cps        | 3.1 %         |
| 205Tl (KED) | 0.004 ppb             | 719 cps           | 7.5 %         |
| 208Pb (KED) | 0.669 ppb             | 85,347 cps        | 1.3 %         |
| 209Bi (KED) | 92.804 %              | 3,275,750 cps     | 0.7 %         |
| 232Th (KED) | 0.060 ppb             | 14,991 cps        | 2.6 %         |
| 238U (KED)  | 0.013 ppb             | 3,616 cps         | 6.3 %         |

## Sample Summary

Instrument ID: iCAP Q

Analysis index: 28

Analysis name: 305047603860469jian

Analysis started at: 11/4/2021 4:11:56 PM

User name: WINDOWS-UPCI4ER\Administrator

| Category    | Concentration average | Concentration RSD |
|-------------|-----------------------|-------------------|
| 6Li (KED)   | 108.087 %             | 0.3 %             |
| 9Be (KED)   | 0.006 ppb             | 188.9 %           |
| 11B (KED)   | 3.173 ppb             | 30.8 %            |
| 24Mg (KED)  | 224.313 ppb           | 0.6 %             |
| 27Al (KED)  | 306.090 ppb           | 1.6 %             |
| 45Sc (KED)  | 106.654 %             | 1.0 %             |
| 51V (KED)   | 0.612 ppb             | 1.3 %             |
| 52Cr (KED)  | 1.225 ppb             | 1.7 %             |
| 55Mn (KED)  | 6.329 ppb             | 1.1 %             |
| 56Fe (KED)  | 313.470 ppb           | 1.3 %             |
| 58Ni (KED)  | 1.692 ppb             | 0.8 %             |
| 59Co (KED)  | 0.144 ppb             | 1.5 %             |
| 63Cu (KED)  | 3.611 ppb             | 1.8 %             |
| 64Zn (KED)  | 59.114 ppb            | 1.4 %             |
| 69Ga (KED)  | 1.216 ppb             | 0.6 %             |
| 75As (KED)  | 0.294 ppb             | 10.6 %            |
| 80Se (KED)  | 0.264 ppb             | 37.6 %            |
| 85Rb (KED)  | 0.987 ppb             | 4.4 %             |
| 88Sr (KED)  | 2.638 ppb             | 1.3 %             |
| 89Y (KED)   | 100.435 %             | 1.6 %             |
| 107Ag (KED) | 0.011 ppb             | 10.0 %            |
| 114Cd (KED) | 0.012 ppb             | 20.5 %            |
| 115In (KED) | 98.115 %              | 0.9 %             |
| 133Cs (KED) | 0.062 ppb             | 1.9 %             |
| 138Ba (KED) | 3.736 ppb             | 4.3 %             |
| 139La (KED) | 0.278 ppb             | 4.0 %             |
| 140Ce (KED) | 0.562 ppb             | 4.2 %             |
| 141Pr (KED) | 0.066 ppb             | 2.8 %             |
| 142Nd (KED) | 0.395 ppb             | 20.1 %            |
| 152Sm (KED) | 0.050 ppb             | 3.5 %             |
| 153Eu (KED) | 0.010 ppb             | 8.2 %             |
| 158Gd (KED) | 0.042 ppb             | 5.8 %             |
| 159Tb (KED) | 98.135 %              | 3.2 %             |
| 164Dy (KED) | 0.031 ppb             | 2.2 %             |
| 166Er (KED) | 0.014 ppb             | 8.4 %             |
| 169Tm (KED) | 0.002 ppb             | 8.6 %             |
| 174Yb (KED) | 0.013 ppb             | 11.4 %            |
| 175Lu (KED) | -0.023 ppb            | 7.2 %             |
| 205Tl (KED) | 0.004 ppb             | 1.7 %             |
| 208Pb (KED) | 0.541 ppb             | 2.6 %             |
| 209Bi (KED) | 93.617 %              | 1.8 %             |
| 232Th (KED) | 0.083 ppb             | 1.9 %             |
| 238U (KED)  | 0.015 ppb             | 3.5 %             |

| Category   | Concentration average | Intensity average | Intensity RSD |
|------------|-----------------------|-------------------|---------------|
| 6Li (KED)  | 108.087 %             | 3,194 cps         | 0.3 %         |
| 9Be (KED)  | 0.006 ppb             | 2 cps             | 86.6 %        |
| 11B (KED)  | 3.173 ppb             | 1,182 cps         | 7.2 %         |
| 24Mg (KED) | 224.313 ppb           | 144,843 cps       | 0.9 %         |
| 27Al (KED) | 306.090 ppb           | 47,660 cps        | 2.3 %         |

# Comprehensive

11/4/2021 4:56:04 PM

| Category    | Concentration average | Intensity average | Intensity RSD |
|-------------|-----------------------|-------------------|---------------|
| 45Sc (KED)  | 106.654 %             | 57,619 cps        | 1.0 %         |
| 51V (KED)   | 0.612 ppb             | 6,383 cps         | 1.5 %         |
| 52Cr (KED)  | 1.225 ppb             | 20,160 cps        | 2.2 %         |
| 55Mn (KED)  | 6.329 ppb             | 49,354 cps        | 2.1 %         |
| 56Fe (KED)  | 313.470 ppb           | 4,521,648 cps     | 1.2 %         |
| 58Ni (KED)  | 1.692 ppb             | 32,276 cps        | 0.9 %         |
| 59Co (KED)  | 0.144 ppb             | 4,472 cps         | 0.6 %         |
| 63Cu (KED)  | 3.611 ppb             | 81,019 cps        | 1.2 %         |
| 64Zn (KED)  | 59.114 ppb            | 335,963 cps       | 0.3 %         |
| 69Ga (KED)  | 1.216 ppb             | 8,663 cps         | 2.1 %         |
| 75As (KED)  | 0.294 ppb             | 488 cps           | 11.5 %        |
| 80Se (KED)  | 0.264 ppb             | 1,486 cps         | 3.0 %         |
| 85Rb (KED)  | 0.987 ppb             | 6,154 cps         | 2.9 %         |
| 88Sr (KED)  | 2.638 ppb             | 22,957 cps        | 1.3 %         |
| 89Y (KED)   | 100.435 %             | 468,096 cps       | 1.6 %         |
| 107Ag (KED) | 0.011 ppb             | 617 cps           | 10.0 %        |
| 114Cd (KED) | 0.012 ppb             | 269 cps           | 19.2 %        |
| 115In (KED) | 98.115 %              | 814,206 cps       | 0.9 %         |
| 133Cs (KED) | 0.062 ppb             | 1,858 cps         | 2.7 %         |
| 138Ba (KED) | 3.736 ppb             | 156,332 cps       | 2.1 %         |
| 139La (KED) | 0.278 ppb             | 25,410 cps        | 0.8 %         |
| 140Ce (KED) | 0.562 ppb             | 68,746 cps        | 1.9 %         |
| 141Pr (KED) | 0.066 ppb             | 8,104 cps         | 0.4 %         |
| 142Nd (KED) | 0.395 ppb             | 19,560 cps        | 16.7 %        |
| 152Sm (KED) | 0.050 ppb             | 2,156 cps         | 2.7 %         |
| 153Eu (KED) | 0.010 ppb             | 837 cps           | 4.9 %         |
| 158Gd (KED) | 0.042 ppb             | 2,515 cps         | 6.8 %         |
| 159Tb (KED) | 98.135 %              | 4,229,851 cps     | 3.2 %         |
| 164Dy (KED) | 0.031 ppb             | 2,003 cps         | 2.6 %         |
| 166Er (KED) | 0.014 ppb             | 1,373 cps         | 5.6 %         |
| 169Tm (KED) | 0.002 ppb             | 551 cps           | 5.1 %         |
| 174Yb (KED) | 0.013 ppb             | 1,187 cps         | 10.0 %        |
| 175Lu (KED) | -0.023 ppb            | 14,253 cps        | 1.4 %         |
| 205Tl (KED) | 0.004 ppb             | 786 cps           | 1.4 %         |
| 208Pb (KED) | 0.541 ppb             | 70,359 cps        | 1.6 %         |
| 209Bi (KED) | 93.617 %              | 3,304,429 cps     | 1.8 %         |
| 232Th (KED) | 0.083 ppb             | 20,736 cps        | 1.2 %         |
| 238U (KED)  | 0.015 ppb             | 4,172 cps         | 3.9 %         |

## Sample Summary

Instrument ID: iCAP Q

Analysis index: 29

Analysis name: 315042603860515jian

Analysis started at: 11/4/2021 4:17:15 PM

User name: WINDOWS-UPCI4ER\Administrator

| Category    | Concentration average | Concentration RSD |
|-------------|-----------------------|-------------------|
| 6Li (KED)   | 109.742 %             | 2.5 %             |
| 9Be (KED)   | 0.005 ppb             | 196.2 %           |
| 11B (KED)   | -3.004 ppb            | 8.7 %             |
| 24Mg (KED)  | 211.789 ppb           | 3.0 %             |
| 27Al (KED)  | 443.741 ppb           | 1.9 %             |
| 45Sc (KED)  | 105.435 %             | 1.7 %             |
| 51V (KED)   | 0.886 ppb             | 1.4 %             |
| 52Cr (KED)  | 1.486 ppb             | 2.0 %             |
| 55Mn (KED)  | 8.581 ppb             | 2.0 %             |
| 56Fe (KED)  | 431.990 ppb           | 1.6 %             |
| 58Ni (KED)  | 2.104 ppb             | 1.5 %             |
| 59Co (KED)  | 0.195 ppb             | 1.0 %             |
| 63Cu (KED)  | 3.419 ppb             | 1.9 %             |
| 64Zn (KED)  | 66.316 ppb            | 1.1 %             |
| 69Ga (KED)  | 1.514 ppb             | 0.8 %             |
| 75As (KED)  | 0.311 ppb             | 3.8 %             |
| 80Se (KED)  | 0.049 ppb             | 288.0 %           |
| 85Rb (KED)  | 1.001 ppb             | 1.5 %             |
| 88Sr (KED)  | 3.217 ppb             | 2.2 %             |
| 89Y (KED)   | 101.852 %             | 0.4 %             |
| 107Ag (KED) | 0.016 ppb             | 7.3 %             |
| 114Cd (KED) | 0.016 ppb             | 10.4 %            |
| 115In (KED) | 96.791 %              | 1.0 %             |
| 133Cs (KED) | 0.085 ppb             | 7.7 %             |
| 138Ba (KED) | 4.738 ppb             | 2.4 %             |
| 139La (KED) | 0.377 ppb             | 0.5 %             |
| 140Ce (KED) | 0.749 ppb             | 0.8 %             |
| 141Pr (KED) | 0.093 ppb             | 2.4 %             |
| 142Nd (KED) | 0.487 ppb             | 1.4 %             |
| 152Sm (KED) | 0.073 ppb             | 3.2 %             |
| 153Eu (KED) | 0.015 ppb             | 4.9 %             |
| 158Gd (KED) | 0.061 ppb             | 3.7 %             |
| 159Tb (KED) | 98.864 %              | 0.6 %             |
| 164Dy (KED) | 0.046 ppb             | 2.0 %             |
| 166Er (KED) | 0.021 ppb             | 8.4 %             |
| 169Tm (KED) | 0.003 ppb             | 6.1 %             |
| 174Yb (KED) | 0.019 ppb             | 7.4 %             |
| 175Lu (KED) | -0.025 ppb            | 4.5 %             |
| 205Tl (KED) | 0.006 ppb             | 0.9 %             |
| 208Pb (KED) | 0.517 ppb             | 1.1 %             |
| 209Bi (KED) | 92.112 %              | 0.7 %             |
| 232Th (KED) | 0.106 ppb             | 2.3 %             |
| 238U (KED)  | 0.019 ppb             | 1.4 %             |

| Category   | Concentration average | Intensity average | Intensity RSD |
|------------|-----------------------|-------------------|---------------|
| 6Li (KED)  | 109.742 %             | 3,243 cps         | 2.5 %         |
| 9Be (KED)  | 0.005 ppb             | 2 cps             | 86.6 %        |
| 11B (KED)  | -3.004 ppb            | 654 cps           | 2.6 %         |
| 24Mg (KED) | 211.789 ppb           | 138,794 cps       | 0.8 %         |
| 27Al (KED) | 443.741 ppb           | 68,233 cps        | 0.2 %         |

# Comprehensive

11/4/2021 4:56:04 PM

| Category    | Concentration average | Intensity average | Intensity RSD |
|-------------|-----------------------|-------------------|---------------|
| 45Sc (KED)  | 105.435 %             | 56,961 cps        | 1.7 %         |
| 51V (KED)   | 0.886 ppb             | 9,128 cps         | 0.4 %         |
| 52Cr (KED)  | 1.486 ppb             | 24,149 cps        | 0.3 %         |
| 55Mn (KED)  | 8.581 ppb             | 66,102 cps        | 0.4 %         |
| 56Fe (KED)  | 431.990 ppb           | 6,159,090 cps     | 2.0 %         |
| 58Ni (KED)  | 2.104 ppb             | 39,565 cps        | 1.1 %         |
| 59Co (KED)  | 0.195 ppb             | 5,979 cps         | 2.3 %         |
| 63Cu (KED)  | 3.419 ppb             | 77,832 cps        | 1.6 %         |
| 64Zn (KED)  | 66.316 ppb            | 381,801 cps       | 0.9 %         |
| 69Ga (KED)  | 1.514 ppb             | 10,916 cps        | 0.9 %         |
| 75As (KED)  | 0.311 ppb             | 523 cps           | 3.4 %         |
| 80Se (KED)  | 0.049 ppb             | 1,403 cps         | 4.9 %         |
| 85Rb (KED)  | 1.001 ppb             | 6,330 cps         | 1.2 %         |
| 88Sr (KED)  | 3.217 ppb             | 28,369 cps        | 2.0 %         |
| 89Y (KED)   | 101.852 %             | 474,702 cps       | 0.4 %         |
| 107Ag (KED) | 0.016 ppb             | 900 cps           | 7.6 %         |
| 114Cd (KED) | 0.016 ppb             | 343 cps           | 8.6 %         |
| 115In (KED) | 96.791 %              | 803,219 cps       | 1.0 %         |
| 133Cs (KED) | 0.085 ppb             | 2,509 cps         | 6.9 %         |
| 138Ba (KED) | 4.738 ppb             | 199,489 cps       | 1.7 %         |
| 139La (KED) | 0.377 ppb             | 34,756 cps        | 1.0 %         |
| 140Ce (KED) | 0.749 ppb             | 92,352 cps        | 0.1 %         |
| 141Pr (KED) | 0.093 ppb             | 11,620 cps        | 1.7 %         |
| 142Nd (KED) | 0.487 ppb             | 24,364 cps        | 1.8 %         |
| 152Sm (KED) | 0.073 ppb             | 3,167 cps         | 3.8 %         |
| 153Eu (KED) | 0.015 ppb             | 1,291 cps         | 4.3 %         |
| 158Gd (KED) | 0.061 ppb             | 3,671 cps         | 4.0 %         |
| 159Tb (KED) | 98.864 %              | 4,261,270 cps     | 0.6 %         |
| 164Dy (KED) | 0.046 ppb             | 3,050 cps         | 1.7 %         |
| 166Er (KED) | 0.021 ppb             | 1,901 cps         | 6.5 %         |
| 169Tm (KED) | 0.003 ppb             | 778 cps           | 6.7 %         |
| 174Yb (KED) | 0.019 ppb             | 1,776 cps         | 7.2 %         |
| 175Lu (KED) | -0.025 ppb            | 14,137 cps        | 0.8 %         |
| 205Tl (KED) | 0.006 ppb             | 1,058 cps         | 0.2 %         |
| 208Pb (KED) | 0.517 ppb             | 66,403 cps        | 0.4 %         |
| 209Bi (KED) | 92.112 %              | 3,251,303 cps     | 0.7 %         |
| 232Th (KED) | 0.106 ppb             | 25,947 cps        | 1.8 %         |
| 238U (KED)  | 0.019 ppb             | 5,158 cps         | 1.3 %         |

## Sample Summary

Instrument ID: iCAP Q

Analysis index: 30

Analysis name: 315042603860521jian

Analysis started at: 11/4/2021 4:20:25 PM

User name: WINDOWS-UPCI4ER\Administrator

| Category    | Concentration average | Concentration RSD |
|-------------|-----------------------|-------------------|
| 6Li (KED)   | 107.259 %             | 3.5 %             |
| 9Be (KED)   | 0.013 ppb             | 154.0 %           |
| 11B (KED)   | 1.014 ppb             | 117.2 %           |
| 24Mg (KED)  | 206.919 ppb           | 4.0 %             |
| 27Al (KED)  | 268.586 ppb           | 3.2 %             |
| 45Sc (KED)  | 104.803 %             | 0.4 %             |
| 51V (KED)   | 0.511 ppb             | 3.2 %             |
| 52Cr (KED)  | 0.865 ppb             | 2.4 %             |
| 55Mn (KED)  | 7.048 ppb             | 1.7 %             |
| 56Fe (KED)  | 255.880 ppb           | 1.6 %             |
| 58Ni (KED)  | 1.373 ppb             | 0.5 %             |
| 59Co (KED)  | 0.138 ppb             | 2.6 %             |
| 63Cu (KED)  | 3.289 ppb             | 1.0 %             |
| 64Zn (KED)  | 61.708 ppb            | 2.0 %             |
| 69Ga (KED)  | 1.208 ppb             | 2.8 %             |
| 75As (KED)  | 0.242 ppb             | 11.5 %            |
| 80Se (KED)  | 0.112 ppb             | 213.6 %           |
| 85Rb (KED)  | 1.366 ppb             | 2.3 %             |
| 88Sr (KED)  | 3.008 ppb             | 2.6 %             |
| 89Y (KED)   | 100.309 %             | 1.1 %             |
| 107Ag (KED) | 0.011 ppb             | 11.1 %            |
| 114Cd (KED) | 0.016 ppb             | 1.2 %             |
| 115In (KED) | 97.043 %              | 0.4 %             |
| 133Cs (KED) | 0.054 ppb             | 3.7 %             |
| 138Ba (KED) | 3.683 ppb             | 0.5 %             |
| 139La (KED) | 0.223 ppb             | 2.1 %             |
| 140Ce (KED) | 0.465 ppb             | 1.9 %             |
| 141Pr (KED) | 0.055 ppb             | 5.2 %             |
| 142Nd (KED) | 0.302 ppb             | 3.4 %             |
| 152Sm (KED) | 0.045 ppb             | 3.6 %             |
| 153Eu (KED) | 0.009 ppb             | 2.5 %             |
| 158Gd (KED) | 0.038 ppb             | 2.3 %             |
| 159Tb (KED) | 100.023 %             | 2.2 %             |
| 164Dy (KED) | 0.028 ppb             | 3.6 %             |
| 166Er (KED) | 0.013 ppb             | 5.4 %             |
| 169Tm (KED) | 0.002 ppb             | 14.6 %            |
| 174Yb (KED) | 0.012 ppb             | 3.3 %             |
| 175Lu (KED) | -0.024 ppb            | 3.9 %             |
| 205Tl (KED) | 0.005 ppb             | 6.3 %             |
| 208Pb (KED) | 0.504 ppb             | 4.3 %             |
| 209Bi (KED) | 93.113 %              | 1.2 %             |
| 232Th (KED) | 0.071 ppb             | 1.4 %             |
| 238U (KED)  | 0.016 ppb             | 2.8 %             |

| Category   | Concentration average | Intensity average | Intensity RSD |
|------------|-----------------------|-------------------|---------------|
| 6Li (KED)  | 107.259 %             | 3,169 cps         | 3.5 %         |
| 9Be (KED)  | 0.013 ppb             | 3 cps             | 100.0 %       |
| 11B (KED)  | 1.014 ppb             | 984 cps           | 7.1 %         |
| 24Mg (KED) | 206.919 ppb           | 132,478 cps       | 0.6 %         |
| 27Al (KED) | 268.586 ppb           | 41,102 cps        | 2.9 %         |

# Comprehensive

11/4/2021 4:56:04 PM

| Category    | Concentration average | Intensity average | Intensity RSD |
|-------------|-----------------------|-------------------|---------------|
| 45Sc (KED)  | 104.803 %             | 56,619 cps        | 0.4 %         |
| 51V (KED)   | 0.511 ppb             | 5,238 cps         | 3.5 %         |
| 52Cr (KED)  | 0.865 ppb             | 14,009 cps        | 2.1 %         |
| 55Mn (KED)  | 7.048 ppb             | 53,991 cps        | 1.3 %         |
| 56Fe (KED)  | 255.880 ppb           | 3,627,579 cps     | 2.0 %         |
| 58Ni (KED)  | 1.373 ppb             | 25,804 cps        | 0.8 %         |
| 59Co (KED)  | 0.138 ppb             | 4,220 cps         | 2.9 %         |
| 63Cu (KED)  | 3.289 ppb             | 73,759 cps        | 2.1 %         |
| 64Zn (KED)  | 61.708 ppb            | 350,103 cps       | 1.0 %         |
| 69Ga (KED)  | 1.208 ppb             | 8,593 cps         | 3.5 %         |
| 75As (KED)  | 0.242 ppb             | 403 cps           | 12.2 %        |
| 80Se (KED)  | 0.112 ppb             | 1,411 cps         | 6.9 %         |
| 85Rb (KED)  | 1.366 ppb             | 8,475 cps         | 1.9 %         |
| 88Sr (KED)  | 3.008 ppb             | 26,122 cps        | 1.5 %         |
| 89Y (KED)   | 100.309 %             | 467,510 cps       | 1.1 %         |
| 107Ag (KED) | 0.011 ppb             | 644 cps           | 10.6 %        |
| 114Cd (KED) | 0.016 ppb             | 354 cps           | 1.4 %         |
| 115In (KED) | 97.043 %              | 805,308 cps       | 0.4 %         |
| 133Cs (KED) | 0.054 ppb             | 1,602 cps         | 4.0 %         |
| 138Ba (KED) | 3.683 ppb             | 157,224 cps       | 2.7 %         |
| 139La (KED) | 0.223 ppb             | 20,806 cps        | 1.7 %         |
| 140Ce (KED) | 0.465 ppb             | 58,037 cps        | 1.0 %         |
| 141Pr (KED) | 0.055 ppb             | 6,952 cps         | 3.7 %         |
| 142Nd (KED) | 0.302 ppb             | 15,309 cps        | 1.6 %         |
| 152Sm (KED) | 0.045 ppb             | 1,970 cps         | 2.5 %         |
| 153Eu (KED) | 0.009 ppb             | 770 cps           | 4.1 %         |
| 158Gd (KED) | 0.038 ppb             | 2,304 cps         | 1.1 %         |
| 159Tb (KED) | 100.023 %             | 4,311,241 cps     | 2.2 %         |
| 164Dy (KED) | 0.028 ppb             | 1,887 cps         | 2.4 %         |
| 166Er (KED) | 0.013 ppb             | 1,286 cps         | 4.8 %         |
| 169Tm (KED) | 0.002 ppb             | 500 cps           | 16.2 %        |
| 174Yb (KED) | 0.012 ppb             | 1,080 cps         | 5.3 %         |
| 175Lu (KED) | -0.024 ppb            | 14,496 cps        | 2.1 %         |
| 205Tl (KED) | 0.005 ppb             | 808 cps           | 6.4 %         |
| 208Pb (KED) | 0.504 ppb             | 65,531 cps        | 3.9 %         |
| 209Bi (KED) | 93.113 %              | 3,286,660 cps     | 1.2 %         |
| 232Th (KED) | 0.071 ppb             | 17,561 cps        | 0.8 %         |
| 238U (KED)  | 0.016 ppb             | 4,331 cps         | 1.7 %         |

## Sample Summary

Instrument ID: iCAP Q

Analysis index: 31

Analysis name: 270jian

Analysis started at: 11/4/2021 4:23:35 PM

User name: WINDOWS-UPCI4ER\Administrator

| Category    | Concentration average | Concentration RSD |
|-------------|-----------------------|-------------------|
| 6Li (KED)   | 111.810 %             |                   |
| 9Be (KED)   | -0.007 ppb            |                   |
| 11B (KED)   | 7.511 ppb             |                   |
| 24Mg (KED)  | 172.621 ppb           |                   |
| 27Al (KED)  | 172.508 ppb           |                   |
| 45Sc (KED)  | 106.047 %             |                   |
| 51V (KED)   | 0.357 ppb             |                   |
| 52Cr (KED)  | 2.165 ppb             |                   |
| 55Mn (KED)  | 4.771 ppb             |                   |
| 56Fe (KED)  | 200.905 ppb           |                   |
| 58Ni (KED)  | 1.517 ppb             |                   |
| 59Co (KED)  | 0.093 ppb             |                   |
| 63Cu (KED)  | 1.883 ppb             |                   |
| 64Zn (KED)  | 63.573 ppb            |                   |
| 69Ga (KED)  | 0.600 ppb             |                   |
| 75As (KED)  | 0.186 ppb             |                   |
| 80Se (KED)  | 0.267 ppb             |                   |
| 85Rb (KED)  | 0.657 ppb             |                   |
| 88Sr (KED)  | 2.336 ppb             |                   |
| 89Y (KED)   | 101.780 %             |                   |
| 107Ag (KED) | 0.013 ppb             |                   |
| 114Cd (KED) | 0.008 ppb             |                   |
| 115In (KED) | 96.918 %              |                   |
| 133Cs (KED) | 0.036 ppb             |                   |
| 138Ba (KED) | 1.796 ppb             |                   |
| 139La (KED) | 0.157 ppb             |                   |
| 140Ce (KED) | 0.314 ppb             |                   |
| 141Pr (KED) | 0.035 ppb             |                   |
| 142Nd (KED) | 0.193 ppb             |                   |
| 152Sm (KED) | 0.026 ppb             |                   |
| 153Eu (KED) | 0.005 ppb             |                   |
| 158Gd (KED) | 0.023 ppb             |                   |
| 159Tb (KED) | 99.952 %              |                   |
| 164Dy (KED) | 0.016 ppb             |                   |
| 166Er (KED) | 0.007 ppb             |                   |
| 169Tm (KED) | 0.001 ppb             |                   |
| 174Yb (KED) | 0.007 ppb             |                   |
| 175Lu (KED) | -0.018 ppb            |                   |
| 205Tl (KED) | 0.003 ppb             |                   |
| 208Pb (KED) | 0.312 ppb             |                   |
| 209Bi (KED) | 95.107 %              |                   |
| 232Th (KED) | 0.050 ppb             |                   |
| 238U (KED)  | 0.018 ppb             |                   |

| Category   | Concentration average | Intensity average | Intensity RSD |
|------------|-----------------------|-------------------|---------------|
| 6Li (KED)  | 111.810 %             | 3,304 cps         |               |
| 9Be (KED)  | -0.007 ppb            | 0 cps             |               |
| 11B (KED)  | 7.511 ppb             | 1,613 cps         |               |
| 24Mg (KED) | 172.621 ppb           | 115,354 cps       |               |
| 27Al (KED) | 172.508 ppb           | 26,755 cps        |               |

# Comprehensive

11/4/2021 4:56:04 PM

| Category    | Concentration average | Intensity average | Intensity RSD |
|-------------|-----------------------|-------------------|---------------|
| 45Sc (KED)  | 106.047 %             | 57,291 cps        |               |
| 51V (KED)   | 0.357 ppb             | 3,704 cps         |               |
| 52Cr (KED)  | 2.165 ppb             | 35,357 cps        |               |
| 55Mn (KED)  | 4.771 ppb             | 37,005 cps        |               |
| 56Fe (KED)  | 200.905 ppb           | 2,882,420 cps     |               |
| 58Ni (KED)  | 1.517 ppb             | 28,797 cps        |               |
| 59Co (KED)  | 0.093 ppb             | 2,877 cps         |               |
| 63Cu (KED)  | 1.883 ppb             | 43,091 cps        |               |
| 64Zn (KED)  | 63.573 ppb            | 365,911 cps       |               |
| 69Ga (KED)  | 0.600 ppb             | 4,377 cps         |               |
| 75As (KED)  | 0.186 ppb             | 317 cps           |               |
| 80Se (KED)  | 0.267 ppb             | 1,507 cps         |               |
| 85Rb (KED)  | 0.657 ppb             | 4,181 cps         |               |
| 88Sr (KED)  | 2.336 ppb             | 20,620 cps        |               |
| 89Y (KED)   | 101.780 %             | 474,366 cps       |               |
| 107Ag (KED) | 0.013 ppb             | 760 cps           |               |
| 114Cd (KED) | 0.008 ppb             | 187 cps           |               |
| 115In (KED) | 96.918 %              | 804,267 cps       |               |
| 133Cs (KED) | 0.036 ppb             | 1,077 cps         |               |
| 138Ba (KED) | 1.796 ppb             | 77,363 cps        |               |
| 139La (KED) | 0.157 ppb             | 14,659 cps        |               |
| 140Ce (KED) | 0.314 ppb             | 39,359 cps        |               |
| 141Pr (KED) | 0.035 ppb             | 4,454 cps         |               |
| 142Nd (KED) | 0.193 ppb             | 9,811 cps         |               |
| 152Sm (KED) | 0.026 ppb             | 1,140 cps         |               |
| 153Eu (KED) | 0.005 ppb             | 467 cps           |               |
| 158Gd (KED) | 0.023 ppb             | 1,380 cps         |               |
| 159Tb (KED) | 99.952 %              | 4,308,185 cps     |               |
| 164Dy (KED) | 0.016 ppb             | 1,093 cps         |               |
| 166Er (KED) | 0.007 ppb             | 850 cps           |               |
| 169Tm (KED) | 0.001 ppb             | 243 cps           |               |
| 174Yb (KED) | 0.007 ppb             | 633 cps           |               |
| 175Lu (KED) | -0.018 ppb            | 15,286 cps        |               |
| 205Tl (KED) | 0.003 ppb             | 587 cps           |               |
| 208Pb (KED) | 0.312 ppb             | 42,884 cps        |               |
| 209Bi (KED) | 95.107 %              | 3,357,046 cps     |               |
| 232Th (KED) | 0.050 ppb             | 12,753 cps        |               |
| 238U (KED)  | 0.018 ppb             | 4,978 cps         |               |

## Sample Summary

Instrument ID: iCAP Q

Analysis index: 32

Analysis name: 272jian

Analysis started at: 11/4/2021 4:25:26 PM

User name: WINDOWS-UPCI4ER\Administrator

| Category    | Concentration average | Concentration RSD |
|-------------|-----------------------|-------------------|
| 6Li (KED)   | 108.876 %             |                   |
| 9Be (KED)   | -0.007 ppb            |                   |
| 11B (KED)   | 5.179 ppb             |                   |
| 24Mg (KED)  | 212.339 ppb           |                   |
| 27Al (KED)  | 184.021 ppb           |                   |
| 45Sc (KED)  | 103.846 %             |                   |
| 51V (KED)   | 0.408 ppb             |                   |
| 52Cr (KED)  | 1.100 ppb             |                   |
| 55Mn (KED)  | 6.316 ppb             |                   |
| 56Fe (KED)  | 278.119 ppb           |                   |
| 58Ni (KED)  | 1.479 ppb             |                   |
| 59Co (KED)  | 0.121 ppb             |                   |
| 63Cu (KED)  | 2.214 ppb             |                   |
| 64Zn (KED)  | 61.978 ppb            |                   |
| 69Ga (KED)  | 0.774 ppb             |                   |
| 75As (KED)  | 0.235 ppb             |                   |
| 80Se (KED)  | 0.322 ppb             |                   |
| 85Rb (KED)  | 0.542 ppb             |                   |
| 88Sr (KED)  | 3.022 ppb             |                   |
| 89Y (KED)   | 101.568 %             |                   |
| 107Ag (KED) | 0.008 ppb             |                   |
| 114Cd (KED) | 0.013 ppb             |                   |
| 115In (KED) | 97.751 %              |                   |
| 133Cs (KED) | 0.042 ppb             |                   |
| 138Ba (KED) | 2.266 ppb             |                   |
| 139La (KED) | 0.177 ppb             |                   |
| 140Ce (KED) | 0.365 ppb             |                   |
| 141Pr (KED) | 0.041 ppb             |                   |
| 142Nd (KED) | 0.225 ppb             |                   |
| 152Sm (KED) | 0.029 ppb             |                   |
| 153Eu (KED) | 0.006 ppb             |                   |
| 158Gd (KED) | 0.027 ppb             |                   |
| 159Tb (KED) | 99.395 %              |                   |
| 164Dy (KED) | 0.020 ppb             |                   |
| 166Er (KED) | 0.007 ppb             |                   |
| 169Tm (KED) | 0.001 ppb             |                   |
| 174Yb (KED) | 0.009 ppb             |                   |
| 175Lu (KED) | -0.023 ppb            |                   |
| 205Tl (KED) | 0.004 ppb             |                   |
| 208Pb (KED) | 0.456 ppb             |                   |
| 209Bi (KED) | 92.212 %              |                   |
| 232Th (KED) | 0.062 ppb             |                   |
| 238U (KED)  | 0.023 ppb             |                   |

| Category   | Concentration average | Intensity average | Intensity RSD |
|------------|-----------------------|-------------------|---------------|
| 6Li (KED)  | 108.876 %             | 3,217 cps         |               |
| 9Be (KED)  | -0.007 ppb            | 0 cps             |               |
| 11B (KED)  | 5.179 ppb             | 1,367 cps         |               |
| 24Mg (KED) | 212.339 ppb           | 138,123 cps       |               |
| 27Al (KED) | 184.021 ppb           | 27,941 cps        |               |

# Comprehensive

11/4/2021 4:56:04 PM

| Category    | Concentration average | Intensity average | Intensity RSD |
|-------------|-----------------------|-------------------|---------------|
| 45Sc (KED)  | 103.846 %             | 56,102 cps        |               |
| 51V (KED)   | 0.408 ppb             | 4,141 cps         |               |
| 52Cr (KED)  | 1.100 ppb             | 17,636 cps        |               |
| 55Mn (KED)  | 6.316 ppb             | 47,952 cps        |               |
| 56Fe (KED)  | 278.119 ppb           | 3,906,540 cps     |               |
| 58Ni (KED)  | 1.479 ppb             | 27,510 cps        |               |
| 59Co (KED)  | 0.121 ppb             | 3,661 cps         |               |
| 63Cu (KED)  | 2.214 ppb             | 50,458 cps        |               |
| 64Zn (KED)  | 61.978 ppb            | 356,087 cps       |               |
| 69Ga (KED)  | 0.774 ppb             | 5,611 cps         |               |
| 75As (KED)  | 0.235 ppb             | 397 cps           |               |
| 80Se (KED)  | 0.322 ppb             | 1,530 cps         |               |
| 85Rb (KED)  | 0.542 ppb             | 3,457 cps         |               |
| 88Sr (KED)  | 3.022 ppb             | 26,582 cps        |               |
| 89Y (KED)   | 101.568 %             | 473,378 cps       |               |
| 107Ag (KED) | 0.008 ppb             | 450 cps           |               |
| 114Cd (KED) | 0.013 ppb             | 293 cps           |               |
| 115In (KED) | 97.751 %              | 811,182 cps       |               |
| 133Cs (KED) | 0.042 ppb             | 1,243 cps         |               |
| 138Ba (KED) | 2.266 ppb             | 96,673 cps        |               |
| 139La (KED) | 0.177 ppb             | 16,441 cps        |               |
| 140Ce (KED) | 0.365 ppb             | 45,436 cps        |               |
| 141Pr (KED) | 0.041 ppb             | 5,131 cps         |               |
| 142Nd (KED) | 0.225 ppb             | 11,379 cps        |               |
| 152Sm (KED) | 0.029 ppb             | 1,290 cps         |               |
| 153Eu (KED) | 0.006 ppb             | 537 cps           |               |
| 158Gd (KED) | 0.027 ppb             | 1,607 cps         |               |
| 159Tb (KED) | 99.395 %              | 4,284,167 cps     |               |
| 164Dy (KED) | 0.020 ppb             | 1,303 cps         |               |
| 166Er (KED) | 0.007 ppb             | 863 cps           |               |
| 169Tm (KED) | 0.001 ppb             | 313 cps           |               |
| 174Yb (KED) | 0.009 ppb             | 867 cps           |               |
| 175Lu (KED) | -0.023 ppb            | 14,452 cps        |               |
| 205Tl (KED) | 0.004 ppb             | 633 cps           |               |
| 208Pb (KED) | 0.456 ppb             | 59,060 cps        |               |
| 209Bi (KED) | 92.212 %              | 3,254,855 cps     |               |
| 232Th (KED) | 0.062 ppb             | 15,393 cps        |               |
| 238U (KED)  | 0.023 ppb             | 6,232 cps         |               |

## Sample Summary

Instrument ID: iCAP Q

Analysis index: 33

Analysis name: 17064jian

Analysis started at: 11/4/2021 4:27:14 PM

User name: WINDOWS-UPCI4ER\Administrator

| Category    | Concentration average | Concentration RSD |
|-------------|-----------------------|-------------------|
| 6Li (KED)   | 106.394 %             |                   |
| 9Be (KED)   | 0.012 ppb             |                   |
| 11B (KED)   | 17.728 ppb            |                   |
| 24Mg (KED)  | 176.528 ppb           |                   |
| 27Al (KED)  | 153.504 ppb           |                   |
| 45Sc (KED)  | 106.369 %             |                   |
| 51V (KED)   | 0.294 ppb             |                   |
| 52Cr (KED)  | 0.437 ppb             |                   |
| 55Mn (KED)  | 5.033 ppb             |                   |
| 56Fe (KED)  | 169.771 ppb           |                   |
| 58Ni (KED)  | 1.174 ppb             |                   |
| 59Co (KED)  | 0.080 ppb             |                   |
| 63Cu (KED)  | 2.382 ppb             |                   |
| 64Zn (KED)  | 65.914 ppb            |                   |
| 69Ga (KED)  | 0.587 ppb             |                   |
| 75As (KED)  | 0.129 ppb             |                   |
| 80Se (KED)  | 0.230 ppb             |                   |
| 85Rb (KED)  | 0.446 ppb             |                   |
| 88Sr (KED)  | 2.632 ppb             |                   |
| 89Y (KED)   | 100.251 %             |                   |
| 107Ag (KED) | 0.006 ppb             |                   |
| 114Cd (KED) | 0.007 ppb             |                   |
| 115In (KED) | 95.395 %              |                   |
| 133Cs (KED) | 0.037 ppb             |                   |
| 138Ba (KED) | 1.825 ppb             |                   |
| 139La (KED) | 0.141 ppb             |                   |
| 140Ce (KED) | 0.291 ppb             |                   |
| 141Pr (KED) | 0.033 ppb             |                   |
| 142Nd (KED) | 0.174 ppb             |                   |
| 152Sm (KED) | 0.024 ppb             |                   |
| 153Eu (KED) | 0.004 ppb             |                   |
| 158Gd (KED) | 0.020 ppb             |                   |
| 159Tb (KED) | 98.788 %              |                   |
| 164Dy (KED) | 0.016 ppb             |                   |
| 166Er (KED) | 0.004 ppb             |                   |
| 169Tm (KED) | 0.001 ppb             |                   |
| 174Yb (KED) | 0.006 ppb             |                   |
| 175Lu (KED) | -0.023 ppb            |                   |
| 205Tl (KED) | 0.003 ppb             |                   |
| 208Pb (KED) | 0.397 ppb             |                   |
| 209Bi (KED) | 94.113 %              |                   |
| 232Th (KED) | 0.047 ppb             |                   |
| 238U (KED)  | 0.017 ppb             |                   |

| Category   | Concentration average | Intensity average | Intensity RSD |
|------------|-----------------------|-------------------|---------------|
| 6Li (KED)  | 106.394 %             | 3,144 cps         |               |
| 9Be (KED)  | 0.012 ppb             | 3 cps             |               |
| 11B (KED)  | 17.728 ppb            | 2,410 cps         |               |
| 24Mg (KED) | 176.528 ppb           | 112,245 cps       |               |
| 27Al (KED) | 153.504 ppb           | 23,893 cps        |               |

# Comprehensive

11/4/2021 4:56:04 PM

| Category    | Concentration average | Intensity average | Intensity RSD |
|-------------|-----------------------|-------------------|---------------|
| 45Sc (KED)  | 106.369 %             | 57,465 cps        |               |
| 51V (KED)   | 0.294 ppb             | 3,064 cps         |               |
| 52Cr (KED)  | 0.437 ppb             | 7,239 cps         |               |
| 55Mn (KED)  | 5.033 ppb             | 39,155 cps        |               |
| 56Fe (KED)  | 169.771 ppb           | 2,443,502 cps     |               |
| 58Ni (KED)  | 1.174 ppb             | 22,440 cps        |               |
| 59Co (KED)  | 0.080 ppb             | 2,497 cps         |               |
| 63Cu (KED)  | 2.382 ppb             | 53,541 cps        |               |
| 64Zn (KED)  | 65.914 ppb            | 373,554 cps       |               |
| 69Ga (KED)  | 0.587 ppb             | 4,221 cps         |               |
| 75As (KED)  | 0.129 ppb             | 220 cps           |               |
| 80Se (KED)  | 0.230 ppb             | 1,467 cps         |               |
| 85Rb (KED)  | 0.446 ppb             | 2,824 cps         |               |
| 88Sr (KED)  | 2.632 ppb             | 22,864 cps        |               |
| 89Y (KED)   | 100.251 %             | 467,241 cps       |               |
| 107Ag (KED) | 0.006 ppb             | 337 cps           |               |
| 114Cd (KED) | 0.007 ppb             | 157 cps           |               |
| 115In (KED) | 95.395 %              | 791,634 cps       |               |
| 133Cs (KED) | 0.037 ppb             | 1,097 cps         |               |
| 138Ba (KED) | 1.825 ppb             | 77,692 cps        |               |
| 139La (KED) | 0.141 ppb             | 12,983 cps        |               |
| 140Ce (KED) | 0.291 ppb             | 36,055 cps        |               |
| 141Pr (KED) | 0.033 ppb             | 4,154 cps         |               |
| 142Nd (KED) | 0.174 ppb             | 8,736 cps         |               |
| 152Sm (KED) | 0.024 ppb             | 1,037 cps         |               |
| 153Eu (KED) | 0.004 ppb             | 380 cps           |               |
| 158Gd (KED) | 0.020 ppb             | 1,177 cps         |               |
| 159Tb (KED) | 98.788 %              | 4,257,994 cps     |               |
| 164Dy (KED) | 0.016 ppb             | 1,050 cps         |               |
| 166Er (KED) | 0.004 ppb             | 630 cps           |               |
| 169Tm (KED) | 0.001 ppb             | 317 cps           |               |
| 174Yb (KED) | 0.006 ppb             | 597 cps           |               |
| 175Lu (KED) | -0.023 ppb            | 14,372 cps        |               |
| 205Tl (KED) | 0.003 ppb             | 483 cps           |               |
| 208Pb (KED) | 0.397 ppb             | 53,023 cps        |               |
| 209Bi (KED) | 94.113 %              | 3,321,938 cps     |               |
| 232Th (KED) | 0.047 ppb             | 11,956 cps        |               |
| 238U (KED)  | 0.017 ppb             | 4,678 cps         |               |

## Sample Summary

Instrument ID: iCAP Q

Analysis index: 34

Analysis name: 17036jian

Analysis started at: 11/4/2021 4:29:07 PM

User name: WINDOWS-UPCI4ER\Administrator

| Category    | Concentration average | Concentration RSD |
|-------------|-----------------------|-------------------|
| 6Li (KED)   | 106.958 %             |                   |
| 9Be (KED)   | 0.012 ppb             |                   |
| 11B (KED)   | 8.634 ppb             |                   |
| 24Mg (KED)  | 228.465 ppb           |                   |
| 27Al (KED)  | 184.796 ppb           |                   |
| 45Sc (KED)  | 105.799 %             |                   |
| 51V (KED)   | 0.439 ppb             |                   |
| 52Cr (KED)  | 0.815 ppb             |                   |
| 55Mn (KED)  | 5.515 ppb             |                   |
| 56Fe (KED)  | 215.580 ppb           |                   |
| 58Ni (KED)  | 1.269 ppb             |                   |
| 59Co (KED)  | 0.115 ppb             |                   |
| 63Cu (KED)  | 1.861 ppb             |                   |
| 64Zn (KED)  | 58.509 ppb            |                   |
| 69Ga (KED)  | 0.657 ppb             |                   |
| 75As (KED)  | 0.196 ppb             |                   |
| 80Se (KED)  | 0.244 ppb             |                   |
| 85Rb (KED)  | 0.697 ppb             |                   |
| 88Sr (KED)  | 2.822 ppb             |                   |
| 89Y (KED)   | 102.733 %             |                   |
| 107Ag (KED) | 0.009 ppb             |                   |
| 114Cd (KED) | 0.006 ppb             |                   |
| 115In (KED) | 98.095 %              |                   |
| 133Cs (KED) | 0.042 ppb             |                   |
| 138Ba (KED) | 1.992 ppb             |                   |
| 139La (KED) | 0.162 ppb             |                   |
| 140Ce (KED) | 0.348 ppb             |                   |
| 141Pr (KED) | 0.042 ppb             |                   |
| 142Nd (KED) | 0.228 ppb             |                   |
| 152Sm (KED) | 0.029 ppb             |                   |
| 153Eu (KED) | 0.005 ppb             |                   |
| 158Gd (KED) | 0.029 ppb             |                   |
| 159Tb (KED) | 101.436 %             |                   |
| 164Dy (KED) | 0.016 ppb             |                   |
| 166Er (KED) | 0.007 ppb             |                   |
| 169Tm (KED) | 0.002 ppb             |                   |
| 174Yb (KED) | 0.007 ppb             |                   |
| 175Lu (KED) | -0.022 ppb            |                   |
| 205Tl (KED) | 0.004 ppb             |                   |
| 208Pb (KED) | 0.349 ppb             |                   |
| 209Bi (KED) | 95.054 %              |                   |
| 232Th (KED) | 0.057 ppb             |                   |
| 238U (KED)  | 0.023 ppb             |                   |

| Category   | Concentration average | Intensity average | Intensity RSD |
|------------|-----------------------|-------------------|---------------|
| 6Li (KED)  | 106.958 %             | 3,160 cps         |               |
| 9Be (KED)  | 0.012 ppb             | 3 cps             |               |
| 11B (KED)  | 8.634 ppb             | 1,640 cps         |               |
| 24Mg (KED) | 228.465 ppb           | 145,978 cps       |               |
| 27Al (KED) | 184.796 ppb           | 28,586 cps        |               |

# Comprehensive

11/4/2021 4:56:04 PM

| Category    | Concentration average | Intensity average | Intensity RSD |
|-------------|-----------------------|-------------------|---------------|
| 45Sc (KED)  | 105.799 %             | 57,157 cps        |               |
| 51V (KED)   | 0.439 ppb             | 4,548 cps         |               |
| 52Cr (KED)  | 0.815 ppb             | 13,334 cps        |               |
| 55Mn (KED)  | 5.515 ppb             | 42,669 cps        |               |
| 56Fe (KED)  | 215.580 ppb           | 3,085,557 cps     |               |
| 58Ni (KED)  | 1.269 ppb             | 24,097 cps        |               |
| 59Co (KED)  | 0.115 ppb             | 3,564 cps         |               |
| 63Cu (KED)  | 1.861 ppb             | 42,981 cps        |               |
| 64Zn (KED)  | 58.509 ppb            | 340,220 cps       |               |
| 69Ga (KED)  | 0.657 ppb             | 4,831 cps         |               |
| 75As (KED)  | 0.196 ppb             | 337 cps           |               |
| 80Se (KED)  | 0.244 ppb             | 1,510 cps         |               |
| 85Rb (KED)  | 0.697 ppb             | 4,471 cps         |               |
| 88Sr (KED)  | 2.822 ppb             | 25,115 cps        |               |
| 89Y (KED)   | 102.733 %             | 478,806 cps       |               |
| 107Ag (KED) | 0.009 ppb             | 553 cps           |               |
| 114Cd (KED) | 0.006 ppb             | 153 cps           |               |
| 115In (KED) | 98.095 %              | 814,041 cps       |               |
| 133Cs (KED) | 0.042 ppb             | 1,253 cps         |               |
| 138Ba (KED) | 1.992 ppb             | 86,946 cps        |               |
| 139La (KED) | 0.162 ppb             | 15,349 cps        |               |
| 140Ce (KED) | 0.348 ppb             | 44,238 cps        |               |
| 141Pr (KED) | 0.042 ppb             | 5,364 cps         |               |
| 142Nd (KED) | 0.228 ppb             | 11,762 cps        |               |
| 152Sm (KED) | 0.029 ppb             | 1,277 cps         |               |
| 153Eu (KED) | 0.005 ppb             | 487 cps           |               |
| 158Gd (KED) | 0.029 ppb             | 1,757 cps         |               |
| 159Tb (KED) | 101.436 %             | 4,372,145 cps     |               |
| 164Dy (KED) | 0.016 ppb             | 1,093 cps         |               |
| 166Er (KED) | 0.007 ppb             | 883 cps           |               |
| 169Tm (KED) | 0.002 ppb             | 403 cps           |               |
| 174Yb (KED) | 0.007 ppb             | 637 cps           |               |
| 175Lu (KED) | -0.022 ppb            | 15,009 cps        |               |
| 205Tl (KED) | 0.004 ppb             | 733 cps           |               |
| 208Pb (KED) | 0.349 ppb             | 47,507 cps        |               |
| 209Bi (KED) | 95.054 %              | 3,355,161 cps     |               |
| 232Th (KED) | 0.057 ppb             | 14,592 cps        |               |
| 238U (KED)  | 0.023 ppb             | 6,485 cps         |               |

## Sample Summary

Instrument ID: iCAP Q

Analysis index: 35

Analysis name: 266jian

Analysis started at: 11/4/2021 4:30:57 PM

User name: WINDOWS-UPCI4ER\Administrator

| Category    | Concentration average | Concentration RSD |
|-------------|-----------------------|-------------------|
| 6Li (KED)   | 113.165 %             |                   |
| 9Be (KED)   | -0.007 ppb            |                   |
| 11B (KED)   | 2.356 ppb             |                   |
| 24Mg (KED)  | 292.739 ppb           |                   |
| 27Al (KED)  | 313.273 ppb           |                   |
| 45Sc (KED)  | 105.402 %             |                   |
| 51V (KED)   | 0.658 ppb             |                   |
| 52Cr (KED)  | 0.762 ppb             |                   |
| 55Mn (KED)  | 9.902 ppb             |                   |
| 56Fe (KED)  | 410.609 ppb           |                   |
| 58Ni (KED)  | 2.235 ppb             |                   |
| 59Co (KED)  | 0.179 ppb             |                   |
| 63Cu (KED)  | 2.211 ppb             |                   |
| 64Zn (KED)  | 54.053 ppb            |                   |
| 69Ga (KED)  | 1.706 ppb             |                   |
| 75As (KED)  | 0.251 ppb             |                   |
| 80Se (KED)  | 0.242 ppb             |                   |
| 85Rb (KED)  | 0.824 ppb             |                   |
| 88Sr (KED)  | 4.323 ppb             |                   |
| 89Y (KED)   | 99.405 %              |                   |
| 107Ag (KED) | 0.013 ppb             |                   |
| 114Cd (KED) | 0.012 ppb             |                   |
| 115In (KED) | 96.193 %              |                   |
| 133Cs (KED) | 0.078 ppb             |                   |
| 138Ba (KED) | 5.337 ppb             |                   |
| 139La (KED) | 0.276 ppb             |                   |
| 140Ce (KED) | 0.572 ppb             |                   |
| 141Pr (KED) | 0.063 ppb             |                   |
| 142Nd (KED) | 0.338 ppb             |                   |
| 152Sm (KED) | 0.049 ppb             |                   |
| 153Eu (KED) | 0.009 ppb             |                   |
| 158Gd (KED) | 0.042 ppb             |                   |
| 159Tb (KED) | 98.558 %              |                   |
| 164Dy (KED) | 0.028 ppb             |                   |
| 166Er (KED) | 0.014 ppb             |                   |
| 169Tm (KED) | 0.002 ppb             |                   |
| 174Yb (KED) | 0.013 ppb             |                   |
| 175Lu (KED) | -0.023 ppb            |                   |
| 205Tl (KED) | 0.006 ppb             |                   |
| 208Pb (KED) | 0.647 ppb             |                   |
| 209Bi (KED) | 94.042 %              |                   |
| 232Th (KED) | 0.092 ppb             |                   |
| 238U (KED)  | 0.028 ppb             |                   |

| Category   | Concentration average | Intensity average | Intensity RSD |
|------------|-----------------------|-------------------|---------------|
| 6Li (KED)  | 113.165 %             | 3,344 cps         |               |
| 9Be (KED)  | -0.007 ppb            | 0 cps             |               |
| 11B (KED)  | 2.356 ppb             | 1,163 cps         |               |
| 24Mg (KED) | 292.739 ppb           | 197,838 cps       |               |
| 27Al (KED) | 313.273 ppb           | 48,200 cps        |               |

# Comprehensive

11/4/2021 4:56:04 PM

| Category    | Concentration average | Intensity average | Intensity RSD |
|-------------|-----------------------|-------------------|---------------|
| 45Sc (KED)  | 105.402 %             | 56,943 cps        |               |
| 51V (KED)   | 0.658 ppb             | 6,785 cps         |               |
| 52Cr (KED)  | 0.762 ppb             | 12,433 cps        |               |
| 55Mn (KED)  | 9.902 ppb             | 76,266 cps        |               |
| 56Fe (KED)  | 410.609 ppb           | 5,852,840 cps     |               |
| 58Ni (KED)  | 2.235 ppb             | 42,004 cps        |               |
| 59Co (KED)  | 0.179 ppb             | 5,491 cps         |               |
| 63Cu (KED)  | 2.211 ppb             | 49,317 cps        |               |
| 64Zn (KED)  | 54.053 ppb            | 304,410 cps       |               |
| 69Ga (KED)  | 1.706 ppb             | 11,992 cps        |               |
| 75As (KED)  | 0.251 ppb             | 413 cps           |               |
| 80Se (KED)  | 0.242 ppb             | 1,460 cps         |               |
| 85Rb (KED)  | 0.824 ppb             | 5,098 cps         |               |
| 88Sr (KED)  | 4.323 ppb             | 37,162 cps        |               |
| 89Y (KED)   | 99.405 %              | 463,297 cps       |               |
| 107Ag (KED) | 0.013 ppb             | 740 cps           |               |
| 114Cd (KED) | 0.012 ppb             | 267 cps           |               |
| 115In (KED) | 96.193 %              | 798,251 cps       |               |
| 133Cs (KED) | 0.078 ppb             | 2,290 cps         |               |
| 138Ba (KED) | 5.337 ppb             | 223,844 cps       |               |
| 139La (KED) | 0.276 ppb             | 25,393 cps        |               |
| 140Ce (KED) | 0.572 ppb             | 70,308 cps        |               |
| 141Pr (KED) | 0.063 ppb             | 7,826 cps         |               |
| 142Nd (KED) | 0.338 ppb             | 16,865 cps        |               |
| 152Sm (KED) | 0.049 ppb             | 2,147 cps         |               |
| 153Eu (KED) | 0.009 ppb             | 797 cps           |               |
| 158Gd (KED) | 0.042 ppb             | 2,520 cps         |               |
| 159Tb (KED) | 98.558 %              | 4,248,061 cps     |               |
| 164Dy (KED) | 0.028 ppb             | 1,833 cps         |               |
| 166Er (KED) | 0.014 ppb             | 1,397 cps         |               |
| 169Tm (KED) | 0.002 ppb             | 573 cps           |               |
| 174Yb (KED) | 0.013 ppb             | 1,230 cps         |               |
| 175Lu (KED) | -0.023 ppb            | 14,418 cps        |               |
| 205Tl (KED) | 0.006 ppb             | 1,020 cps         |               |
| 208Pb (KED) | 0.647 ppb             | 83,788 cps        |               |
| 209Bi (KED) | 94.042 %              | 3,319,444 cps     |               |
| 232Th (KED) | 0.092 ppb             | 23,188 cps        |               |
| 238U (KED)  | 0.028 ppb             | 7,956 cps         |               |

## Sample Summary

Instrument ID: iCAP Q

Analysis index: 36

Analysis name: 278 jian

Analysis started at: 11/4/2021 4:32:45 PM

User name: WINDOWS-UPCI4ER\Administrator

| Category    | Concentration average | Concentration RSD |
|-------------|-----------------------|-------------------|
| 6Li (KED)   | 115.308 %             |                   |
| 9Be (KED)   | 0.011 ppb             |                   |
| 11B (KED)   | -4.957 ppb            |                   |
| 24Mg (KED)  | 395.167 ppb           |                   |
| 27Al (KED)  | 413.254 ppb           |                   |
| 45Sc (KED)  | 112.147 %             |                   |
| 51V (KED)   | 0.891 ppb             |                   |
| 52Cr (KED)  | 1.261 ppb             |                   |
| 55Mn (KED)  | 13.713 ppb            |                   |
| 56Fe (KED)  | 580.101 ppb           |                   |
| 58Ni (KED)  | 2.844 ppb             |                   |
| 59Co (KED)  | 0.253 ppb             |                   |
| 63Cu (KED)  | 2.683 ppb             |                   |
| 64Zn (KED)  | 58.820 ppb            |                   |
| 69Ga (KED)  | 1.461 ppb             |                   |
| 75As (KED)  | 0.302 ppb             |                   |
| 80Se (KED)  | -0.016 ppb            |                   |
| 85Rb (KED)  | 0.909 ppb             |                   |
| 88Sr (KED)  | 5.158 ppb             |                   |
| 89Y (KED)   | 103.447 %             |                   |
| 107Ag (KED) | 0.008 ppb             |                   |
| 114Cd (KED) | 0.019 ppb             |                   |
| 115In (KED) | 99.042 %              |                   |
| 133Cs (KED) | 0.103 ppb             |                   |
| 138Ba (KED) | 4.400 ppb             |                   |
| 139La (KED) | 0.462 ppb             |                   |
| 140Ce (KED) | 0.901 ppb             |                   |
| 141Pr (KED) | 0.100 ppb             |                   |
| 142Nd (KED) | 0.567 ppb             |                   |
| 152Sm (KED) | 0.082 ppb             |                   |
| 153Eu (KED) | 0.014 ppb             |                   |
| 158Gd (KED) | 0.065 ppb             |                   |
| 159Tb (KED) | 103.624 %             |                   |
| 164Dy (KED) | 0.046 ppb             |                   |
| 166Er (KED) | 0.024 ppb             |                   |
| 169Tm (KED) | 0.003 ppb             |                   |
| 174Yb (KED) | 0.022 ppb             |                   |
| 175Lu (KED) | -0.022 ppb            |                   |
| 205Tl (KED) | 0.006 ppb             |                   |
| 208Pb (KED) | 0.630 ppb             |                   |
| 209Bi (KED) | 93.580 %              |                   |
| 232Th (KED) | 0.144 ppb             |                   |
| 238U (KED)  | 0.045 ppb             |                   |

| Category   | Concentration average | Intensity average | Intensity RSD |
|------------|-----------------------|-------------------|---------------|
| 6Li (KED)  | 115.308 %             | 3,407 cps         |               |
| 9Be (KED)  | 0.011 ppb             | 3 cps             |               |
| 11B (KED)  | -4.957 ppb            | 507 cps           |               |
| 24Mg (KED) | 395.167 ppb           | 272,041 cps       |               |
| 27Al (KED) | 413.254 ppb           | 67,613 cps        |               |

# Comprehensive

11/4/2021 4:56:04 PM

| Category    | Concentration average | Intensity average | Intensity RSD |
|-------------|-----------------------|-------------------|---------------|
| 45Sc (KED)  | 112.147 %             | 60,587 cps        |               |
| 51V (KED)   | 0.891 ppb             | 9,767 cps         |               |
| 52Cr (KED)  | 1.261 ppb             | 21,809 cps        |               |
| 55Mn (KED)  | 13.713 ppb            | 112,351 cps       |               |
| 56Fe (KED)  | 580.101 ppb           | 8,796,875 cps     |               |
| 58Ni (KED)  | 2.844 ppb             | 56,769 cps        |               |
| 59Co (KED)  | 0.253 ppb             | 8,229 cps         |               |
| 63Cu (KED)  | 2.683 ppb             | 62,151 cps        |               |
| 64Zn (KED)  | 58.820 ppb            | 344,389 cps       |               |
| 69Ga (KED)  | 1.461 ppb             | 10,701 cps        |               |
| 75As (KED)  | 0.302 ppb             | 517 cps           |               |
| 80Se (KED)  | -0.016 ppb            | 1,393 cps         |               |
| 85Rb (KED)  | 0.909 ppb             | 5,845 cps         |               |
| 88Sr (KED)  | 5.158 ppb             | 46,118 cps        |               |
| 89Y (KED)   | 103.447 %             | 482,136 cps       |               |
| 107Ag (KED) | 0.008 ppb             | 450 cps           |               |
| 114Cd (KED) | 0.019 ppb             | 410 cps           |               |
| 115In (KED) | 99.042 %              | 821,894 cps       |               |
| 133Cs (KED) | 0.103 ppb             | 3,084 cps         |               |
| 138Ba (KED) | 4.400 ppb             | 194,271 cps       |               |
| 139La (KED) | 0.462 ppb             | 44,650 cps        |               |
| 140Ce (KED) | 0.901 ppb             | 116,313 cps       |               |
| 141Pr (KED) | 0.100 ppb             | 13,060 cps        |               |
| 142Nd (KED) | 0.567 ppb             | 29,749 cps        |               |
| 152Sm (KED) | 0.082 ppb             | 3,724 cps         |               |
| 153Eu (KED) | 0.014 ppb             | 1,330 cps         |               |
| 158Gd (KED) | 0.065 ppb             | 4,094 cps         |               |
| 159Tb (KED) | 103.624 %             | 4,466,430 cps     |               |
| 164Dy (KED) | 0.046 ppb             | 3,180 cps         |               |
| 166Er (KED) | 0.024 ppb             | 2,230 cps         |               |
| 169Tm (KED) | 0.003 ppb             | 930 cps           |               |
| 174Yb (KED) | 0.022 ppb             | 2,070 cps         |               |
| 175Lu (KED) | -0.022 ppb            | 15,319 cps        |               |
| 205Tl (KED) | 0.006 ppb             | 1,123 cps         |               |
| 208Pb (KED) | 0.630 ppb             | 81,248 cps        |               |
| 209Bi (KED) | 93.580 %              | 3,303,125 cps     |               |
| 232Th (KED) | 0.144 ppb             | 35,895 cps        |               |
| 238U (KED)  | 0.045 ppb             | 12,483 cps        |               |

## Sample Summary

Instrument ID: iCAP Q

Analysis index: 37

Analysis name: 16005 jian

Analysis started at: 11/4/2021 4:34:35 PM

User name: WINDOWS-UPCI4ER\Administrator

| Category    | Concentration average | Concentration RSD |
|-------------|-----------------------|-------------------|
| 6Li (KED)   | 105.717 %             |                   |
| 9Be (KED)   | 0.012 ppb             |                   |
| 11B (KED)   | 36.755 ppb            |                   |
| 24Mg (KED)  | 188.940 ppb           |                   |
| 27Al (KED)  | 152.769 ppb           |                   |
| 45Sc (KED)  | 106.580 %             |                   |
| 51V (KED)   | 0.318 ppb             |                   |
| 52Cr (KED)  | 0.477 ppb             |                   |
| 55Mn (KED)  | 5.230 ppb             |                   |
| 56Fe (KED)  | 178.720 ppb           |                   |
| 58Ni (KED)  | 0.990 ppb             |                   |
| 59Co (KED)  | 0.096 ppb             |                   |
| 63Cu (KED)  | 1.390 ppb             |                   |
| 64Zn (KED)  | 54.827 ppb            |                   |
| 69Ga (KED)  | 0.525 ppb             |                   |
| 75As (KED)  | 0.481 ppb             |                   |
| 80Se (KED)  | 0.326 ppb             |                   |
| 85Rb (KED)  | 0.386 ppb             |                   |
| 88Sr (KED)  | 2.448 ppb             |                   |
| 89Y (KED)   | 99.445 %              |                   |
| 107Ag (KED) | 0.006 ppb             |                   |
| 114Cd (KED) | 0.009 ppb             |                   |
| 115In (KED) | 98.411 %              |                   |
| 133Cs (KED) | 0.031 ppb             |                   |
| 138Ba (KED) | 1.574 ppb             |                   |
| 139La (KED) | 0.139 ppb             |                   |
| 140Ce (KED) | 0.284 ppb             |                   |
| 141Pr (KED) | 0.032 ppb             |                   |
| 142Nd (KED) | 0.177 ppb             |                   |
| 152Sm (KED) | 0.025 ppb             |                   |
| 153Eu (KED) | 0.004 ppb             |                   |
| 158Gd (KED) | 0.022 ppb             |                   |
| 159Tb (KED) | 100.230 %             |                   |
| 164Dy (KED) | 0.015 ppb             |                   |
| 166Er (KED) | 0.006 ppb             |                   |
| 169Tm (KED) | 0.001 ppb             |                   |
| 174Yb (KED) | 0.006 ppb             |                   |
| 175Lu (KED) | -0.021 ppb            |                   |
| 205Tl (KED) | 0.003 ppb             |                   |
| 208Pb (KED) | 0.345 ppb             |                   |
| 209Bi (KED) | 93.132 %              |                   |
| 232Th (KED) | 0.046 ppb             |                   |
| 238U (KED)  | 0.020 ppb             |                   |

| Category   | Concentration average | Intensity average | Intensity RSD |
|------------|-----------------------|-------------------|---------------|
| 6Li (KED)  | 105.717 %             | 3,124 cps         |               |
| 9Be (KED)  | 0.012 ppb             | 3 cps             |               |
| 11B (KED)  | 36.755 ppb            | 4,014 cps         |               |
| 24Mg (KED) | 188.940 ppb           | 119,358 cps       |               |
| 27Al (KED) | 152.769 ppb           | 23,826 cps        |               |

# Comprehensive

11/4/2021 4:56:04 PM

| Category    | Concentration average | Intensity average | Intensity RSD |
|-------------|-----------------------|-------------------|---------------|
| 45Sc (KED)  | 106.580 %             | 57,579 cps        |               |
| 51V (KED)   | 0.318 ppb             | 3,314 cps         |               |
| 52Cr (KED)  | 0.477 ppb             | 7,899 cps         |               |
| 55Mn (KED)  | 5.230 ppb             | 40,763 cps        |               |
| 56Fe (KED)  | 178.720 ppb           | 2,577,276 cps     |               |
| 58Ni (KED)  | 0.990 ppb             | 19,014 cps        |               |
| 59Co (KED)  | 0.096 ppb             | 3,000 cps         |               |
| 63Cu (KED)  | 1.390 ppb             | 31,226 cps        |               |
| 64Zn (KED)  | 54.827 ppb            | 308,841 cps       |               |
| 69Ga (KED)  | 0.525 ppb             | 3,751 cps         |               |
| 75As (KED)  | 0.481 ppb             | 783 cps           |               |
| 80Se (KED)  | 0.326 ppb             | 1,500 cps         |               |
| 85Rb (KED)  | 0.386 ppb             | 2,437 cps         |               |
| 88Sr (KED)  | 2.448 ppb             | 21,101 cps        |               |
| 89Y (KED)   | 99.445 %              | 463,484 cps       |               |
| 107Ag (KED) | 0.006 ppb             | 340 cps           |               |
| 114Cd (KED) | 0.009 ppb             | 210 cps           |               |
| 115In (KED) | 98.411 %              | 816,663 cps       |               |
| 133Cs (KED) | 0.031 ppb             | 940 cps           |               |
| 138Ba (KED) | 1.574 ppb             | 68,179 cps        |               |
| 139La (KED) | 0.139 ppb             | 13,050 cps        |               |
| 140Ce (KED) | 0.284 ppb             | 35,664 cps        |               |
| 141Pr (KED) | 0.032 ppb             | 4,054 cps         |               |
| 142Nd (KED) | 0.177 ppb             | 9,030 cps         |               |
| 152Sm (KED) | 0.025 ppb             | 1,117 cps         |               |
| 153Eu (KED) | 0.004 ppb             | 400 cps           |               |
| 158Gd (KED) | 0.022 ppb             | 1,353 cps         |               |
| 159Tb (KED) | 100.230 %             | 4,320,167 cps     |               |
| 164Dy (KED) | 0.015 ppb             | 1,027 cps         |               |
| 166Er (KED) | 0.006 ppb             | 783 cps           |               |
| 169Tm (KED) | 0.001 ppb             | 217 cps           |               |
| 174Yb (KED) | 0.006 ppb             | 563 cps           |               |
| 175Lu (KED) | -0.021 ppb            | 14,919 cps        |               |
| 205Tl (KED) | 0.003 ppb             | 520 cps           |               |
| 208Pb (KED) | 0.345 ppb             | 46,112 cps        |               |
| 209Bi (KED) | 93.132 %              | 3,287,323 cps     |               |
| 232Th (KED) | 0.046 ppb             | 11,532 cps        |               |
| 238U (KED)  | 0.020 ppb             | 5,451 cps         |               |

## Sample Summary

Instrument ID: iCAP Q

Analysis index: 38

Analysis name: 16092jian

Analysis started at: 11/4/2021 4:36:20 PM

User name: WINDOWS-UPCI4ER\Administrator

| Category    | Concentration average | Concentration RSD |
|-------------|-----------------------|-------------------|
| 6Li (KED)   | 113.164 %             |                   |
| 9Be (KED)   | 0.011 ppb             |                   |
| 11B (KED)   | 0.233 ppb             |                   |
| 24Mg (KED)  | 204.940 ppb           |                   |
| 27Al (KED)  | 177.053 ppb           |                   |
| 45Sc (KED)  | 106.884 %             |                   |
| 51V (KED)   | 0.357 ppb             |                   |
| 52Cr (KED)  | 0.699 ppb             |                   |
| 55Mn (KED)  | 5.370 ppb             |                   |
| 56Fe (KED)  | 209.610 ppb           |                   |
| 58Ni (KED)  | 1.102 ppb             |                   |
| 59Co (KED)  | 0.096 ppb             |                   |
| 63Cu (KED)  | 2.972 ppb             |                   |
| 64Zn (KED)  | 53.366 ppb            |                   |
| 69Ga (KED)  | 0.684 ppb             |                   |
| 75As (KED)  | 0.193 ppb             |                   |
| 80Se (KED)  | -0.145 ppb            |                   |
| 85Rb (KED)  | 0.521 ppb             |                   |
| 88Sr (KED)  | 2.919 ppb             |                   |
| 89Y (KED)   | 103.146 %             |                   |
| 107Ag (KED) | 0.007 ppb             |                   |
| 114Cd (KED) | 0.005 ppb             |                   |
| 115In (KED) | 98.322 %              |                   |
| 133Cs (KED) | 0.040 ppb             |                   |
| 138Ba (KED) | 2.320 ppb             |                   |
| 139La (KED) | 0.171 ppb             |                   |
| 140Ce (KED) | 0.333 ppb             |                   |
| 141Pr (KED) | 0.039 ppb             |                   |
| 142Nd (KED) | 0.212 ppb             |                   |
| 152Sm (KED) | 0.029 ppb             |                   |
| 153Eu (KED) | 0.005 ppb             |                   |
| 158Gd (KED) | 0.025 ppb             |                   |
| 159Tb (KED) | 96.535 %              |                   |
| 164Dy (KED) | 0.020 ppb             |                   |
| 166Er (KED) | 0.007 ppb             |                   |
| 169Tm (KED) | 0.001 ppb             |                   |
| 174Yb (KED) | 0.006 ppb             |                   |
| 175Lu (KED) | -0.017 ppb            |                   |
| 205Tl (KED) | 0.003 ppb             |                   |
| 208Pb (KED) | 0.348 ppb             |                   |
| 209Bi (KED) | 95.151 %              |                   |
| 232Th (KED) | 0.053 ppb             |                   |
| 238U (KED)  | 0.023 ppb             |                   |

| Category   | Concentration average | Intensity average | Intensity RSD |
|------------|-----------------------|-------------------|---------------|
| 6Li (KED)  | 113.164 %             | 3,344 cps         |               |
| 9Be (KED)  | 0.011 ppb             | 3 cps             |               |
| 11B (KED)  | 0.233 ppb             | 970 cps           |               |
| 24Mg (KED) | 204.940 ppb           | 138,568 cps       |               |
| 27Al (KED) | 177.053 ppb           | 27,674 cps        |               |

# Comprehensive

11/4/2021 4:56:04 PM

| Category    | Concentration average | Intensity average | Intensity RSD |
|-------------|-----------------------|-------------------|---------------|
| 45Sc (KED)  | 106.884 %             | 57,743 cps        |               |
| 51V (KED)   | 0.357 ppb             | 3,731 cps         |               |
| 52Cr (KED)  | 0.699 ppb             | 11,572 cps        |               |
| 55Mn (KED)  | 5.370 ppb             | 41,971 cps        |               |
| 56Fe (KED)  | 209.610 ppb           | 3,030,947 cps     |               |
| 58Ni (KED)  | 1.102 ppb             | 21,191 cps        |               |
| 59Co (KED)  | 0.096 ppb             | 3,014 cps         |               |
| 63Cu (KED)  | 2.972 ppb             | 68,588 cps        |               |
| 64Zn (KED)  | 53.366 ppb            | 311,900 cps       |               |
| 69Ga (KED)  | 0.684 ppb             | 5,041 cps         |               |
| 75As (KED)  | 0.193 ppb             | 333 cps           |               |
| 80Se (KED)  | -0.145 ppb            | 1,327 cps         |               |
| 85Rb (KED)  | 0.521 ppb             | 3,380 cps         |               |
| 88Sr (KED)  | 2.919 ppb             | 26,074 cps        |               |
| 89Y (KED)   | 103.146 %             | 480,733 cps       |               |
| 107Ag (KED) | 0.007 ppb             | 420 cps           |               |
| 114Cd (KED) | 0.005 ppb             | 137 cps           |               |
| 115In (KED) | 98.322 %              | 815,921 cps       |               |
| 133Cs (KED) | 0.040 ppb             | 1,207 cps         |               |
| 138Ba (KED) | 2.320 ppb             | 96,107 cps        |               |
| 139La (KED) | 0.171 ppb             | 15,400 cps        |               |
| 140Ce (KED) | 0.333 ppb             | 40,249 cps        |               |
| 141Pr (KED) | 0.039 ppb             | 4,758 cps         |               |
| 142Nd (KED) | 0.212 ppb             | 10,398 cps        |               |
| 152Sm (KED) | 0.029 ppb             | 1,253 cps         |               |
| 153Eu (KED) | 0.005 ppb             | 443 cps           |               |
| 158Gd (KED) | 0.025 ppb             | 1,480 cps         |               |
| 159Tb (KED) | 96.535 %              | 4,160,902 cps     |               |
| 164Dy (KED) | 0.020 ppb             | 1,270 cps         |               |
| 166Er (KED) | 0.007 ppb             | 820 cps           |               |
| 169Tm (KED) | 0.001 ppb             | 280 cps           |               |
| 174Yb (KED) | 0.006 ppb             | 587 cps           |               |
| 175Lu (KED) | -0.017 ppb            | 14,952 cps        |               |
| 205Tl (KED) | 0.003 ppb             | 570 cps           |               |
| 208Pb (KED) | 0.348 ppb             | 47,434 cps        |               |
| 209Bi (KED) | 95.151 %              | 3,358,589 cps     |               |
| 232Th (KED) | 0.053 ppb             | 13,434 cps        |               |
| 238U (KED)  | 0.023 ppb             | 6,515 cps         |               |

## Sample Summary

Instrument ID: iCAP Q

Analysis index: 39

Analysis name: 262jian

Analysis started at: 11/4/2021 4:38:06 PM

User name: WINDOWS-UPCI4ER\Administrator

| Category    | Concentration average | Concentration RSD |
|-------------|-----------------------|-------------------|
| 6Li (KED)   | 112.487 %             |                   |
| 9Be (KED)   | 0.011 ppb             |                   |
| 11B (KED)   | 12.668 ppb            |                   |
| 24Mg (KED)  | 319.352 ppb           |                   |
| 27Al (KED)  | 338.268 ppb           |                   |
| 45Sc (KED)  | 106.152 %             |                   |
| 51V (KED)   | 0.668 ppb             |                   |
| 52Cr (KED)  | 0.854 ppb             |                   |
| 55Mn (KED)  | 10.556 ppb            |                   |
| 56Fe (KED)  | 373.180 ppb           |                   |
| 58Ni (KED)  | 1.880 ppb             |                   |
| 59Co (KED)  | 0.156 ppb             |                   |
| 63Cu (KED)  | 2.889 ppb             |                   |
| 64Zn (KED)  | 57.146 ppb            |                   |
| 69Ga (KED)  | 1.387 ppb             |                   |
| 75As (KED)  | 0.205 ppb             |                   |
| 80Se (KED)  | 0.260 ppb             |                   |
| 85Rb (KED)  | 0.887 ppb             |                   |
| 88Sr (KED)  | 5.630 ppb             |                   |
| 89Y (KED)   | 100.203 %             |                   |
| 107Ag (KED) | 0.008 ppb             |                   |
| 114Cd (KED) | 0.016 ppb             |                   |
| 115In (KED) | 98.252 %              |                   |
| 133Cs (KED) | 0.069 ppb             |                   |
| 138Ba (KED) | 4.300 ppb             |                   |
| 139La (KED) | 0.299 ppb             |                   |
| 140Ce (KED) | 0.586 ppb             |                   |
| 141Pr (KED) | 0.066 ppb             |                   |
| 142Nd (KED) | 0.365 ppb             |                   |
| 152Sm (KED) | 0.051 ppb             |                   |
| 153Eu (KED) | 0.010 ppb             |                   |
| 158Gd (KED) | 0.043 ppb             |                   |
| 159Tb (KED) | 100.012 %             |                   |
| 164Dy (KED) | 0.036 ppb             |                   |
| 166Er (KED) | 0.013 ppb             |                   |
| 169Tm (KED) | 0.003 ppb             |                   |
| 174Yb (KED) | 0.014 ppb             |                   |
| 175Lu (KED) | -0.022 ppb            |                   |
| 205Tl (KED) | 0.006 ppb             |                   |
| 208Pb (KED) | 0.539 ppb             |                   |
| 209Bi (KED) | 94.165 %              |                   |
| 232Th (KED) | 0.090 ppb             |                   |
| 238U (KED)  | 0.031 ppb             |                   |

| Category   | Concentration average | Intensity average | Intensity RSD |
|------------|-----------------------|-------------------|---------------|
| 6Li (KED)  | 112.487 %             | 3,324 cps         |               |
| 9Be (KED)  | 0.011 ppb             | 3 cps             |               |
| 11B (KED)  | 12.668 ppb            | 2,090 cps         |               |
| 24Mg (KED) | 319.352 ppb           | 214,512 cps       |               |
| 27Al (KED) | 338.268 ppb           | 52,407 cps        |               |

# Comprehensive

11/4/2021 4:56:04 PM

| Category    | Concentration average | Intensity average | Intensity RSD |
|-------------|-----------------------|-------------------|---------------|
| 45Sc (KED)  | 106.152 %             | 57,348 cps        |               |
| 51V (KED)   | 0.668 ppb             | 6,932 cps         |               |
| 52Cr (KED)  | 0.854 ppb             | 14,015 cps        |               |
| 55Mn (KED)  | 10.556 ppb            | 81,878 cps        |               |
| 56Fe (KED)  | 373.180 ppb           | 5,357,398 cps     |               |
| 58Ni (KED)  | 1.880 ppb             | 35,647 cps        |               |
| 59Co (KED)  | 0.156 ppb             | 4,808 cps         |               |
| 63Cu (KED)  | 2.889 ppb             | 64,781 cps        |               |
| 64Zn (KED)  | 57.146 ppb            | 324,196 cps       |               |
| 69Ga (KED)  | 1.387 ppb             | 9,844 cps         |               |
| 75As (KED)  | 0.205 ppb             | 343 cps           |               |
| 80Se (KED)  | 0.260 ppb             | 1,480 cps         |               |
| 85Rb (KED)  | 0.887 ppb             | 5,528 cps         |               |
| 88Sr (KED)  | 5.630 ppb             | 48,745 cps        |               |
| 89Y (KED)   | 100.203 %             | 467,015 cps       |               |
| 107Ag (KED) | 0.008 ppb             | 447 cps           |               |
| 114Cd (KED) | 0.016 ppb             | 347 cps           |               |
| 115In (KED) | 98.252 %              | 815,336 cps       |               |
| 133Cs (KED) | 0.069 ppb             | 2,077 cps         |               |
| 138Ba (KED) | 4.300 ppb             | 183,300 cps       |               |
| 139La (KED) | 0.299 ppb             | 27,864 cps        |               |
| 140Ce (KED) | 0.586 ppb             | 73,098 cps        |               |
| 141Pr (KED) | 0.066 ppb             | 8,363 cps         |               |
| 142Nd (KED) | 0.365 ppb             | 18,490 cps        |               |
| 152Sm (KED) | 0.051 ppb             | 2,240 cps         |               |
| 153Eu (KED) | 0.010 ppb             | 910 cps           |               |
| 158Gd (KED) | 0.043 ppb             | 2,594 cps         |               |
| 159Tb (KED) | 100.012 %             | 4,310,760 cps     |               |
| 164Dy (KED) | 0.036 ppb             | 2,414 cps         |               |
| 166Er (KED) | 0.013 ppb             | 1,347 cps         |               |
| 169Tm (KED) | 0.003 ppb             | 673 cps           |               |
| 174Yb (KED) | 0.014 ppb             | 1,263 cps         |               |
| 175Lu (KED) | -0.022 ppb            | 14,772 cps        |               |
| 205Tl (KED) | 0.006 ppb             | 1,110 cps         |               |
| 208Pb (KED) | 0.539 ppb             | 70,603 cps        |               |
| 209Bi (KED) | 94.165 %              | 3,323,785 cps     |               |
| 232Th (KED) | 0.090 ppb             | 22,627 cps        |               |
| 238U (KED)  | 0.031 ppb             | 8,656 cps         |               |

## Sample Summary

Instrument ID: iCAP Q

Analysis index: 40

Analysis name: 17080jian

Analysis started at: 11/4/2021 4:39:53 PM

User name: WINDOWS-UPCI4ER\Administrator

| Category    | Concentration average | Concentration RSD |
|-------------|-----------------------|-------------------|
| 6Li (KED)   | 111.021 %             |                   |
| 9Be (KED)   | -0.007 ppb            |                   |
| 11B (KED)   | 19.204 ppb            |                   |
| 24Mg (KED)  | 244.897 ppb           |                   |
| 27Al (KED)  | 265.159 ppb           |                   |
| 45Sc (KED)  | 103.543 %             |                   |
| 51V (KED)   | 0.538 ppb             |                   |
| 52Cr (KED)  | 1.169 ppb             |                   |
| 55Mn (KED)  | 7.986 ppb             |                   |
| 56Fe (KED)  | 328.046 ppb           |                   |
| 58Ni (KED)  | 1.520 ppb             |                   |
| 59Co (KED)  | 0.149 ppb             |                   |
| 63Cu (KED)  | 2.470 ppb             |                   |
| 64Zn (KED)  | 58.429 ppb            |                   |
| 69Ga (KED)  | 0.942 ppb             |                   |
| 75As (KED)  | 0.211 ppb             |                   |
| 80Se (KED)  | 0.338 ppb             |                   |
| 85Rb (KED)  | 0.824 ppb             |                   |
| 88Sr (KED)  | 3.753 ppb             |                   |
| 89Y (KED)   | 99.522 %              |                   |
| 107Ag (KED) | 0.010 ppb             |                   |
| 114Cd (KED) | 0.011 ppb             |                   |
| 115In (KED) | 96.793 %              |                   |
| 133Cs (KED) | 0.060 ppb             |                   |
| 138Ba (KED) | 2.943 ppb             |                   |
| 139La (KED) | 0.241 ppb             |                   |
| 140Ce (KED) | 0.524 ppb             |                   |
| 141Pr (KED) | 0.057 ppb             |                   |
| 142Nd (KED) | 0.315 ppb             |                   |
| 152Sm (KED) | 0.041 ppb             |                   |
| 153Eu (KED) | 0.008 ppb             |                   |
| 158Gd (KED) | 0.034 ppb             |                   |
| 159Tb (KED) | 97.610 %              |                   |
| 164Dy (KED) | 0.026 ppb             |                   |
| 166Er (KED) | 0.012 ppb             |                   |
| 169Tm (KED) | 0.002 ppb             |                   |
| 174Yb (KED) | 0.010 ppb             |                   |
| 175Lu (KED) | -0.022 ppb            |                   |
| 205Tl (KED) | 0.005 ppb             |                   |
| 208Pb (KED) | 0.427 ppb             |                   |
| 209Bi (KED) | 92.990 %              |                   |
| 232Th (KED) | 0.075 ppb             |                   |
| 238U (KED)  | 0.028 ppb             |                   |

| Category   | Concentration average | Intensity average | Intensity RSD |
|------------|-----------------------|-------------------|---------------|
| 6Li (KED)  | 111.021 %             | 3,280 cps         |               |
| 9Be (KED)  | -0.007 ppb            | 0 cps             |               |
| 11B (KED)  | 19.204 ppb            | 2,647 cps         |               |
| 24Mg (KED) | 244.897 ppb           | 162,405 cps       |               |
| 27Al (KED) | 265.159 ppb           | 40,094 cps        |               |

# Comprehensive

11/4/2021 4:56:04 PM

| Category    | Concentration average | Intensity average | Intensity RSD |
|-------------|-----------------------|-------------------|---------------|
| 45Sc (KED)  | 103.543 %             | 55,939 cps        |               |
| 51V (KED)   | 0.538 ppb             | 5,445 cps         |               |
| 52Cr (KED)  | 1.169 ppb             | 18,677 cps        |               |
| 55Mn (KED)  | 7.986 ppb             | 60,433 cps        |               |
| 56Fe (KED)  | 328.046 ppb           | 4,593,971 cps     |               |
| 58Ni (KED)  | 1.520 ppb             | 28,175 cps        |               |
| 59Co (KED)  | 0.149 ppb             | 4,504 cps         |               |
| 63Cu (KED)  | 2.470 ppb             | 55,095 cps        |               |
| 64Zn (KED)  | 58.429 ppb            | 329,141 cps       |               |
| 69Ga (KED)  | 0.942 ppb             | 6,665 cps         |               |
| 75As (KED)  | 0.211 ppb             | 350 cps           |               |
| 80Se (KED)  | 0.338 ppb             | 1,507 cps         |               |
| 85Rb (KED)  | 0.824 ppb             | 5,104 cps         |               |
| 88Sr (KED)  | 3.753 ppb             | 32,315 cps        |               |
| 89Y (KED)   | 99.522 %              | 463,841 cps       |               |
| 107Ag (KED) | 0.010 ppb             | 553 cps           |               |
| 114Cd (KED) | 0.011 ppb             | 240 cps           |               |
| 115In (KED) | 96.793 %              | 803,233 cps       |               |
| 133Cs (KED) | 0.060 ppb             | 1,777 cps         |               |
| 138Ba (KED) | 2.943 ppb             | 122,884 cps       |               |
| 139La (KED) | 0.241 ppb             | 21,969 cps        |               |
| 140Ce (KED) | 0.524 ppb             | 63,873 cps        |               |
| 141Pr (KED) | 0.057 ppb             | 7,012 cps         |               |
| 142Nd (KED) | 0.315 ppb             | 15,580 cps        |               |
| 152Sm (KED) | 0.041 ppb             | 1,757 cps         |               |
| 153Eu (KED) | 0.008 ppb             | 697 cps           |               |
| 158Gd (KED) | 0.034 ppb             | 2,034 cps         |               |
| 159Tb (KED) | 97.610 %              | 4,207,225 cps     |               |
| 164Dy (KED) | 0.026 ppb             | 1,730 cps         |               |
| 166Er (KED) | 0.012 ppb             | 1,200 cps         |               |
| 169Tm (KED) | 0.002 ppb             | 523 cps           |               |
| 174Yb (KED) | 0.010 ppb             | 923 cps           |               |
| 175Lu (KED) | -0.022 ppb            | 14,298 cps        |               |
| 205Tl (KED) | 0.005 ppb             | 827 cps           |               |
| 208Pb (KED) | 0.427 ppb             | 55,992 cps        |               |
| 209Bi (KED) | 92.990 %              | 3,282,310 cps     |               |
| 232Th (KED) | 0.075 ppb             | 18,667 cps        |               |
| 238U (KED)  | 0.028 ppb             | 7,672 cps         |               |

## Sample Summary

Instrument ID: iCAP Q

Analysis index: 41

Analysis name: 280jian

Analysis started at: 11/4/2021 4:41:38 PM

User name: WINDOWS-UPCI4ER\Administrator

| Category    | Concentration average | Concentration RSD |
|-------------|-----------------------|-------------------|
| 6Li (KED)   | 113.503 %             |                   |
| 9Be (KED)   | 0.011 ppb             |                   |
| 11B (KED)   | 1.113 ppb             |                   |
| 24Mg (KED)  | 317.351 ppb           |                   |
| 27Al (KED)  | 319.728 ppb           |                   |
| 45Sc (KED)  | 107.280 %             |                   |
| 51V (KED)   | 0.698 ppb             |                   |
| 52Cr (KED)  | 1.056 ppb             |                   |
| 55Mn (KED)  | 9.594 ppb             |                   |
| 56Fe (KED)  | 427.189 ppb           |                   |
| 58Ni (KED)  | 2.015 ppb             |                   |
| 59Co (KED)  | 0.176 ppb             |                   |
| 63Cu (KED)  | 2.164 ppb             |                   |
| 64Zn (KED)  | 53.787 ppb            |                   |
| 69Ga (KED)  | 1.100 ppb             |                   |
| 75As (KED)  | 0.237 ppb             |                   |
| 80Se (KED)  | 0.454 ppb             |                   |
| 85Rb (KED)  | 0.796 ppb             |                   |
| 88Sr (KED)  | 4.301 ppb             |                   |
| 89Y (KED)   | 102.424 %             |                   |
| 107Ag (KED) | 0.007 ppb             |                   |
| 114Cd (KED) | 0.008 ppb             |                   |
| 115In (KED) | 100.628 %             |                   |
| 133Cs (KED) | 0.068 ppb             |                   |
| 138Ba (KED) | 3.296 ppb             |                   |
| 139La (KED) | 0.339 ppb             |                   |
| 140Ce (KED) | 0.703 ppb             |                   |
| 141Pr (KED) | 0.081 ppb             |                   |
| 142Nd (KED) | 0.425 ppb             |                   |
| 152Sm (KED) | 0.059 ppb             |                   |
| 153Eu (KED) | 0.010 ppb             |                   |
| 158Gd (KED) | 0.050 ppb             |                   |
| 159Tb (KED) | 100.376 %             |                   |
| 164Dy (KED) | 0.033 ppb             |                   |
| 166Er (KED) | 0.014 ppb             |                   |
| 169Tm (KED) | 0.002 ppb             |                   |
| 174Yb (KED) | 0.013 ppb             |                   |
| 175Lu (KED) | -0.019 ppb            |                   |
| 205Tl (KED) | 0.005 ppb             |                   |
| 208Pb (KED) | 0.506 ppb             |                   |
| 209Bi (KED) | 93.682 %              |                   |
| 232Th (KED) | 0.108 ppb             |                   |
| 238U (KED)  | 0.033 ppb             |                   |

| Category   | Concentration average | Intensity average | Intensity RSD |
|------------|-----------------------|-------------------|---------------|
| 6Li (KED)  | 113.503 %             | 3,354 cps         |               |
| 9Be (KED)  | 0.011 ppb             | 3 cps             |               |
| 11B (KED)  | 1.113 ppb             | 1,053 cps         |               |
| 24Mg (KED) | 317.351 ppb           | 215,094 cps       |               |
| 27Al (KED) | 319.728 ppb           | 50,067 cps        |               |

# Comprehensive

11/4/2021 4:56:04 PM

| Category    | Concentration average | Intensity average | Intensity RSD |
|-------------|-----------------------|-------------------|---------------|
| 45Sc (KED)  | 107.280 %             | 57,958 cps        |               |
| 51V (KED)   | 0.698 ppb             | 7,322 cps         |               |
| 52Cr (KED)  | 1.056 ppb             | 17,486 cps        |               |
| 55Mn (KED)  | 9.594 ppb             | 75,212 cps        |               |
| 56Fe (KED)  | 427.189 ppb           | 6,197,561 cps     |               |
| 58Ni (KED)  | 2.015 ppb             | 38,576 cps        |               |
| 59Co (KED)  | 0.176 ppb             | 5,508 cps         |               |
| 63Cu (KED)  | 2.164 ppb             | 49,742 cps        |               |
| 64Zn (KED)  | 53.787 ppb            | 312,129 cps       |               |
| 69Ga (KED)  | 1.100 ppb             | 7,996 cps         |               |
| 75As (KED)  | 0.237 ppb             | 403 cps           |               |
| 80Se (KED)  | 0.454 ppb             | 1,607 cps         |               |
| 85Rb (KED)  | 0.796 ppb             | 5,078 cps         |               |
| 88Sr (KED)  | 4.301 ppb             | 38,095 cps        |               |
| 89Y (KED)   | 102.424 %             | 477,369 cps       |               |
| 107Ag (KED) | 0.007 ppb             | 410 cps           |               |
| 114Cd (KED) | 0.008 ppb             | 203 cps           |               |
| 115In (KED) | 100.628 %             | 835,057 cps       |               |
| 133Cs (KED) | 0.068 ppb             | 2,074 cps         |               |
| 138Ba (KED) | 3.296 ppb             | 141,344 cps       |               |
| 139La (KED) | 0.339 ppb             | 31,707 cps        |               |
| 140Ce (KED) | 0.703 ppb             | 87,946 cps        |               |
| 141Pr (KED) | 0.081 ppb             | 10,238 cps        |               |
| 142Nd (KED) | 0.425 ppb             | 21,599 cps        |               |
| 152Sm (KED) | 0.059 ppb             | 2,600 cps         |               |
| 153Eu (KED) | 0.010 ppb             | 910 cps           |               |
| 158Gd (KED) | 0.050 ppb             | 3,017 cps         |               |
| 159Tb (KED) | 100.376 %             | 4,326,422 cps     |               |
| 164Dy (KED) | 0.033 ppb             | 2,194 cps         |               |
| 166Er (KED) | 0.014 ppb             | 1,417 cps         |               |
| 169Tm (KED) | 0.002 ppb             | 593 cps           |               |
| 174Yb (KED) | 0.013 ppb             | 1,197 cps         |               |
| 175Lu (KED) | -0.019 ppb            | 15,253 cps        |               |
| 205Tl (KED) | 0.005 ppb             | 840 cps           |               |
| 208Pb (KED) | 0.506 ppb             | 66,162 cps        |               |
| 209Bi (KED) | 93.682 %              | 3,306,718 cps     |               |
| 232Th (KED) | 0.108 ppb             | 26,973 cps        |               |
| 238U (KED)  | 0.033 ppb             | 9,160 cps         |               |

## Sample Summary

Instrument ID: iCAP Q

Analysis index: 42

Analysis name: 18074jian

Analysis started at: 11/4/2021 4:43:23 PM

User name: WINDOWS-UPCI4ER\Administrator

| Category    | Concentration average | Concentration RSD |
|-------------|-----------------------|-------------------|
| 6Li (KED)   | 105.266 %             |                   |
| 9Be (KED)   | -0.007 ppb            |                   |
| 11B (KED)   | 4.888 ppb             |                   |
| 24Mg (KED)  | 251.346 ppb           |                   |
| 27Al (KED)  | 212.612 ppb           |                   |
| 45Sc (KED)  | 105.104 %             |                   |
| 51V (KED)   | 0.433 ppb             |                   |
| 52Cr (KED)  | 0.863 ppb             |                   |
| 55Mn (KED)  | 6.714 ppb             |                   |
| 56Fe (KED)  | 250.758 ppb           |                   |
| 58Ni (KED)  | 1.280 ppb             |                   |
| 59Co (KED)  | 0.121 ppb             |                   |
| 63Cu (KED)  | 2.880 ppb             |                   |
| 64Zn (KED)  | 54.140 ppb            |                   |
| 69Ga (KED)  | 0.759 ppb             |                   |
| 75As (KED)  | 0.173 ppb             |                   |
| 80Se (KED)  | 0.357 ppb             |                   |
| 85Rb (KED)  | 0.546 ppb             |                   |
| 88Sr (KED)  | 3.418 ppb             |                   |
| 89Y (KED)   | 100.899 %             |                   |
| 107Ag (KED) | 0.024 ppb             |                   |
| 114Cd (KED) | 0.008 ppb             |                   |
| 115In (KED) | 97.246 %              |                   |
| 133Cs (KED) | 0.046 ppb             |                   |
| 138Ba (KED) | 2.289 ppb             |                   |
| 139La (KED) | 0.172 ppb             |                   |
| 140Ce (KED) | 0.349 ppb             |                   |
| 141Pr (KED) | 0.041 ppb             |                   |
| 142Nd (KED) | 0.232 ppb             |                   |
| 152Sm (KED) | 0.034 ppb             |                   |
| 153Eu (KED) | 0.007 ppb             |                   |
| 158Gd (KED) | 0.026 ppb             |                   |
| 159Tb (KED) | 102.135 %             |                   |
| 164Dy (KED) | 0.018 ppb             |                   |
| 166Er (KED) | 0.008 ppb             |                   |
| 169Tm (KED) | 0.002 ppb             |                   |
| 174Yb (KED) | 0.007 ppb             |                   |
| 175Lu (KED) | -0.023 ppb            |                   |
| 205Tl (KED) | 0.003 ppb             |                   |
| 208Pb (KED) | 0.502 ppb             |                   |
| 209Bi (KED) | 93.615 %              |                   |
| 232Th (KED) | 0.057 ppb             |                   |
| 238U (KED)  | 0.027 ppb             |                   |

| Category   | Concentration average | Intensity average | Intensity RSD |
|------------|-----------------------|-------------------|---------------|
| 6Li (KED)  | 105.266 %             | 3,110 cps         |               |
| 9Be (KED)  | -0.007 ppb            | 0 cps             |               |
| 11B (KED)  | 4.888 ppb             | 1,297 cps         |               |
| 24Mg (KED) | 251.346 ppb           | 158,037 cps       |               |
| 27Al (KED) | 212.612 ppb           | 32,656 cps        |               |

# Comprehensive

11/4/2021 4:56:04 PM

| Category    | Concentration average | Intensity average | Intensity RSD |
|-------------|-----------------------|-------------------|---------------|
| 45Sc (KED)  | 105.104 %             | 56,782 cps        |               |
| 51V (KED)   | 0.433 ppb             | 4,447 cps         |               |
| 52Cr (KED)  | 0.863 ppb             | 14,028 cps        |               |
| 55Mn (KED)  | 6.714 ppb             | 51,590 cps        |               |
| 56Fe (KED)  | 250.758 ppb           | 3,565,124 cps     |               |
| 58Ni (KED)  | 1.280 ppb             | 24,150 cps        |               |
| 59Co (KED)  | 0.121 ppb             | 3,697 cps         |               |
| 63Cu (KED)  | 2.880 ppb             | 65,049 cps        |               |
| 64Zn (KED)  | 54.140 ppb            | 309,474 cps       |               |
| 69Ga (KED)  | 0.759 ppb             | 5,465 cps         |               |
| 75As (KED)  | 0.173 ppb             | 293 cps           |               |
| 80Se (KED)  | 0.357 ppb             | 1,537 cps         |               |
| 85Rb (KED)  | 0.546 ppb             | 3,460 cps         |               |
| 88Sr (KED)  | 3.418 ppb             | 29,849 cps        |               |
| 89Y (KED)   | 100.899 %             | 470,260 cps       |               |
| 107Ag (KED) | 0.024 ppb             | 1,370 cps         |               |
| 114Cd (KED) | 0.008 ppb             | 187 cps           |               |
| 115In (KED) | 97.246 %              | 806,992 cps       |               |
| 133Cs (KED) | 0.046 ppb             | 1,377 cps         |               |
| 138Ba (KED) | 2.289 ppb             | 100,332 cps       |               |
| 139La (KED) | 0.172 ppb             | 16,438 cps        |               |
| 140Ce (KED) | 0.349 ppb             | 44,597 cps        |               |
| 141Pr (KED) | 0.041 ppb             | 5,254 cps         |               |
| 142Nd (KED) | 0.232 ppb             | 12,036 cps        |               |
| 152Sm (KED) | 0.034 ppb             | 1,547 cps         |               |
| 153Eu (KED) | 0.007 ppb             | 607 cps           |               |
| 158Gd (KED) | 0.026 ppb             | 1,620 cps         |               |
| 159Tb (KED) | 102.135 %             | 4,402,260 cps     |               |
| 164Dy (KED) | 0.018 ppb             | 1,253 cps         |               |
| 166Er (KED) | 0.008 ppb             | 950 cps           |               |
| 169Tm (KED) | 0.002 ppb             | 423 cps           |               |
| 174Yb (KED) | 0.007 ppb             | 707 cps           |               |
| 175Lu (KED) | -0.023 ppb            | 14,812 cps        |               |
| 205Tl (KED) | 0.003 ppb             | 553 cps           |               |
| 208Pb (KED) | 0.502 ppb             | 65,556 cps        |               |
| 209Bi (KED) | 93.615 %              | 3,304,383 cps     |               |
| 232Th (KED) | 0.057 ppb             | 14,308 cps        |               |
| 238U (KED)  | 0.027 ppb             | 7,569 cps         |               |

## Sample Summary

Instrument ID: iCAP Q

Analysis index: 43

Analysis name: 276jian

Analysis started at: 11/4/2021 4:45:10 PM

User name: WINDOWS-UPCI4ER\Administrator

| Category    | Concentration average | Concentration RSD |
|-------------|-----------------------|-------------------|
| 6Li (KED)   | 111.810 %             |                   |
| 9Be (KED)   | 0.011 ppb             |                   |
| 11B (KED)   | 2.510 ppb             |                   |
| 24Mg (KED)  | 192.459 ppb           |                   |
| 27Al (KED)  | 151.799 ppb           |                   |
| 45Sc (KED)  | 106.821 %             |                   |
| 51V (KED)   | 0.321 ppb             |                   |
| 52Cr (KED)  | 1.333 ppb             |                   |
| 55Mn (KED)  | 4.977 ppb             |                   |
| 56Fe (KED)  | 190.415 ppb           |                   |
| 58Ni (KED)  | 1.154 ppb             |                   |
| 59Co (KED)  | 0.093 ppb             |                   |
| 63Cu (KED)  | 5.159 ppb             |                   |
| 64Zn (KED)  | 76.652 ppb            |                   |
| 69Ga (KED)  | 0.667 ppb             |                   |
| 75As (KED)  | 0.161 ppb             |                   |
| 80Se (KED)  | 0.187 ppb             |                   |
| 85Rb (KED)  | 0.697 ppb             |                   |
| 88Sr (KED)  | 2.992 ppb             |                   |
| 89Y (KED)   | 99.813 %              |                   |
| 107Ag (KED) | 0.014 ppb             |                   |
| 114Cd (KED) | 0.010 ppb             |                   |
| 115In (KED) | 96.582 %              |                   |
| 133Cs (KED) | 0.035 ppb             |                   |
| 138Ba (KED) | 2.182 ppb             |                   |
| 139La (KED) | 0.132 ppb             |                   |
| 140Ce (KED) | 0.269 ppb             |                   |
| 141Pr (KED) | 0.031 ppb             |                   |
| 142Nd (KED) | 0.175 ppb             |                   |
| 152Sm (KED) | 0.024 ppb             |                   |
| 153Eu (KED) | 0.005 ppb             |                   |
| 158Gd (KED) | 0.020 ppb             |                   |
| 159Tb (KED) | 99.095 %              |                   |
| 164Dy (KED) | 0.015 ppb             |                   |
| 166Er (KED) | 0.005 ppb             |                   |
| 169Tm (KED) | 0.001 ppb             |                   |
| 174Yb (KED) | 0.006 ppb             |                   |
| 175Lu (KED) | -0.016 ppb            |                   |
| 205Tl (KED) | 0.004 ppb             |                   |
| 208Pb (KED) | 0.703 ppb             |                   |
| 209Bi (KED) | 93.821 %              |                   |
| 232Th (KED) | 0.043 ppb             |                   |
| 238U (KED)  | 0.021 ppb             |                   |

| Category   | Concentration average | Intensity average | Intensity RSD |
|------------|-----------------------|-------------------|---------------|
| 6Li (KED)  | 111.810 %             | 3,304 cps         |               |
| 9Be (KED)  | 0.011 ppb             | 3 cps             |               |
| 11B (KED)  | 2.510 ppb             | 1,163 cps         |               |
| 24Mg (KED) | 192.459 ppb           | 128,586 cps       |               |
| 27Al (KED) | 151.799 ppb           | 23,729 cps        |               |

# Comprehensive

11/4/2021 4:56:04 PM

| Category    | Concentration average | Intensity average | Intensity RSD |
|-------------|-----------------------|-------------------|---------------|
| 45Sc (KED)  | 106.821 %             | 57,710 cps        |               |
| 51V (KED)   | 0.321 ppb             | 3,357 cps         |               |
| 52Cr (KED)  | 1.333 ppb             | 21,963 cps        |               |
| 55Mn (KED)  | 4.977 ppb             | 38,887 cps        |               |
| 56Fe (KED)  | 190.415 ppb           | 2,751,998 cps     |               |
| 58Ni (KED)  | 1.154 ppb             | 22,153 cps        |               |
| 59Co (KED)  | 0.093 ppb             | 2,917 cps         |               |
| 63Cu (KED)  | 5.159 ppb             | 114,825 cps       |               |
| 64Zn (KED)  | 76.652 ppb            | 431,908 cps       |               |
| 69Ga (KED)  | 0.667 ppb             | 4,761 cps         |               |
| 75As (KED)  | 0.161 ppb             | 270 cps           |               |
| 80Se (KED)  | 0.187 ppb             | 1,440 cps         |               |
| 85Rb (KED)  | 0.697 ppb             | 4,344 cps         |               |
| 88Sr (KED)  | 2.992 ppb             | 25,867 cps        |               |
| 89Y (KED)   | 99.813 %              | 465,200 cps       |               |
| 107Ag (KED) | 0.014 ppb             | 773 cps           |               |
| 114Cd (KED) | 0.010 ppb             | 217 cps           |               |
| 115In (KED) | 96.582 %              | 801,481 cps       |               |
| 133Cs (KED) | 0.035 ppb             | 1,033 cps         |               |
| 138Ba (KED) | 2.182 ppb             | 92,879 cps        |               |
| 139La (KED) | 0.132 ppb             | 12,206 cps        |               |
| 140Ce (KED) | 0.269 ppb             | 33,395 cps        |               |
| 141Pr (KED) | 0.031 ppb             | 3,894 cps         |               |
| 142Nd (KED) | 0.175 ppb             | 8,796 cps         |               |
| 152Sm (KED) | 0.024 ppb             | 1,060 cps         |               |
| 153Eu (KED) | 0.005 ppb             | 440 cps           |               |
| 158Gd (KED) | 0.020 ppb             | 1,183 cps         |               |
| 159Tb (KED) | 99.095 %              | 4,271,238 cps     |               |
| 164Dy (KED) | 0.015 ppb             | 1,020 cps         |               |
| 166Er (KED) | 0.005 ppb             | 703 cps           |               |
| 169Tm (KED) | 0.001 ppb             | 287 cps           |               |
| 174Yb (KED) | 0.006 ppb             | 577 cps           |               |
| 175Lu (KED) | -0.016 ppb            | 15,476 cps        |               |
| 205Tl (KED) | 0.004 ppb             | 690 cps           |               |
| 208Pb (KED) | 0.703 ppb             | 90,481 cps        |               |
| 209Bi (KED) | 93.821 %              | 3,311,634 cps     |               |
| 232Th (KED) | 0.043 ppb             | 10,771 cps        |               |
| 238U (KED)  | 0.021 ppb             | 5,758 cps         |               |

## Sample Summary

Instrument ID: iCAP Q

Analysis index: 44

Analysis name: 001152921177301jian

Analysis started at: 11/4/2021 4:46:55 PM

User name: WINDOWS-UPCI4ER\Administrator

| Category    | Concentration average | Concentration RSD |
|-------------|-----------------------|-------------------|
| 6Li (KED)   | 47.947 %              |                   |
| 9Be (KED)   | 0.163 ppb             |                   |
| 11B (KED)   | 22.233 ppb            |                   |
| 24Mg (KED)  | 544.479 ppb           |                   |
| 27Al (KED)  | 615.253 ppb           |                   |
| 45Sc (KED)  | 42.131 %              |                   |
| 51V (KED)   | 1.277 ppb             |                   |
| 52Cr (KED)  | 1.836 ppb             |                   |
| 55Mn (KED)  | 18.641 ppb            |                   |
| 56Fe (KED)  | 752.348 ppb           |                   |
| 58Ni (KED)  | 3.514 ppb             |                   |
| 59Co (KED)  | 0.291 ppb             |                   |
| 63Cu (KED)  | 6.463 ppb             |                   |
| 64Zn (KED)  | 113.612 ppb           |                   |
| 69Ga (KED)  | 2.226 ppb             |                   |
| 75As (KED)  | 0.521 ppb             |                   |
| 80Se (KED)  | 5.501 ppb             |                   |
| 85Rb (KED)  | 1.349 ppb             |                   |
| 88Sr (KED)  | 8.234 ppb             |                   |
| 89Y (KED)   | 40.260 %              |                   |
| 107Ag (KED) | 0.065 ppb             |                   |
| 114Cd (KED) | 0.021 ppb             |                   |
| 115In (KED) | 38.052 %              |                   |
| 133Cs (KED) | 0.134 ppb             |                   |
| 138Ba (KED) | 7.321 ppb             |                   |
| 139La (KED) | 0.554 ppb             |                   |
| 140Ce (KED) | 1.182 ppb             |                   |
| 141Pr (KED) | 0.140 ppb             |                   |
| 142Nd (KED) | 0.727 ppb             |                   |
| 152Sm (KED) | 0.109 ppb             |                   |
| 153Eu (KED) | 0.017 ppb             |                   |
| 158Gd (KED) | 0.088 ppb             |                   |
| 159Tb (KED) | 37.743 %              |                   |
| 164Dy (KED) | 0.064 ppb             |                   |
| 166Er (KED) | 0.036 ppb             |                   |
| 169Tm (KED) | 0.004 ppb             |                   |
| 174Yb (KED) | 0.028 ppb             |                   |
| 175Lu (KED) | -0.017 ppb            |                   |
| 205Tl (KED) | 0.009 ppb             |                   |
| 208Pb (KED) | 1.156 ppb             |                   |
| 209Bi (KED) | 37.311 %              |                   |
| 232Th (KED) | 0.198 ppb             |                   |
| 238U (KED)  | 0.060 ppb             |                   |

| Category   | Concentration average | Intensity average | Intensity RSD |
|------------|-----------------------|-------------------|---------------|
| 6Li (KED)  | 47.947 %              | 1,417 cps         |               |
| 9Be (KED)  | 0.163 ppb             | 13 cps            |               |
| 11B (KED)  | 22.233 ppb            | 1,260 cps         |               |
| 24Mg (KED) | 544.479 ppb           | 155,826 cps       |               |
| 27Al (KED) | 615.253 ppb           | 37,794 cps        |               |

# Comprehensive

11/4/2021 4:56:04 PM

| Category    | Concentration average | Intensity average | Intensity RSD |
|-------------|-----------------------|-------------------|---------------|
| 45Sc (KED)  | 42.131 %              | 22,761 cps        |               |
| 51V (KED)   | 1.277 ppb             | 5,258 cps         |               |
| 52Cr (KED)  | 1.836 ppb             | 11,916 cps        |               |
| 55Mn (KED)  | 18.641 ppb            | 57,362 cps        |               |
| 56Fe (KED)  | 752.348 ppb           | 4,285,744 cps     |               |
| 58Ni (KED)  | 3.514 ppb             | 26,314 cps        |               |
| 59Co (KED)  | 0.291 ppb             | 3,564 cps         |               |
| 63Cu (KED)  | 6.463 ppb             | 57,964 cps        |               |
| 64Zn (KED)  | 113.612 ppb           | 257,497 cps       |               |
| 69Ga (KED)  | 2.226 ppb             | 6,325 cps         |               |
| 75As (KED)  | 0.521 ppb             | 343 cps           |               |
| 80Se (KED)  | 5.501 ppb             | 1,590 cps         |               |
| 85Rb (KED)  | 1.349 ppb             | 3,360 cps         |               |
| 88Sr (KED)  | 8.234 ppb             | 28,623 cps        |               |
| 89Y (KED)   | 40.260 %              | 187,641 cps       |               |
| 107Ag (KED) | 0.065 ppb             | 1,430 cps         |               |
| 114Cd (KED) | 0.021 ppb             | 177 cps           |               |
| 115In (KED) | 38.052 %              | 315,773 cps       |               |
| 133Cs (KED) | 0.134 ppb             | 1,540 cps         |               |
| 138Ba (KED) | 7.321 ppb             | 117,376 cps       |               |
| 139La (KED) | 0.554 ppb             | 19,512 cps        |               |
| 140Ce (KED) | 1.182 ppb             | 55,537 cps        |               |
| 141Pr (KED) | 0.140 ppb             | 6,622 cps         |               |
| 142Nd (KED) | 0.727 ppb             | 13,888 cps        |               |
| 152Sm (KED) | 0.109 ppb             | 1,810 cps         |               |
| 153Eu (KED) | 0.017 ppb             | 580 cps           |               |
| 158Gd (KED) | 0.088 ppb             | 2,017 cps         |               |
| 159Tb (KED) | 37.743 %              | 1,626,803 cps     |               |
| 164Dy (KED) | 0.064 ppb             | 1,617 cps         |               |
| 166Er (KED) | 0.036 ppb             | 1,180 cps         |               |
| 169Tm (KED) | 0.004 ppb             | 377 cps           |               |
| 174Yb (KED) | 0.028 ppb             | 993 cps           |               |
| 175Lu (KED) | -0.017 ppb            | 5,858 cps         |               |
| 205Tl (KED) | 0.009 ppb             | 650 cps           |               |
| 208Pb (KED) | 1.156 ppb             | 58,132 cps        |               |
| 209Bi (KED) | 37.311 %              | 1,316,983 cps     |               |
| 232Th (KED) | 0.198 ppb             | 19,656 cps        |               |
| 238U (KED)  | 0.060 ppb             | 6,638 cps         |               |

## Sample Summary

Instrument ID: iCAP Q

Analysis index: 45

Analysis name: 274jian

Analysis started at: 11/4/2021 4:48:42 PM

User name: WINDOWS-UPCI4ER\Administrator

| Category    | Concentration average | Concentration RSD |
|-------------|-----------------------|-------------------|
| 6Li (KED)   | 44.111 %              |                   |
| 9Be (KED)   | -0.007 ppb            |                   |
| 11B (KED)   | -2.436 ppb            |                   |
| 24Mg (KED)  | 324.796 ppb           |                   |
| 27Al (KED)  | 273.709 ppb           |                   |
| 45Sc (KED)  | 40.492 %              |                   |
| 51V (KED)   | 0.538 ppb             |                   |
| 52Cr (KED)  | 1.056 ppb             |                   |
| 55Mn (KED)  | 8.191 ppb             |                   |
| 56Fe (KED)  | 320.046 ppb           |                   |
| 58Ni (KED)  | 1.867 ppb             |                   |
| 59Co (KED)  | 0.170 ppb             |                   |
| 63Cu (KED)  | 3.441 ppb             |                   |
| 64Zn (KED)  | 113.923 ppb           |                   |
| 69Ga (KED)  | 1.034 ppb             |                   |
| 75As (KED)  | 0.319 ppb             |                   |
| 80Se (KED)  | 4.782 ppb             |                   |
| 85Rb (KED)  | 0.846 ppb             |                   |
| 88Sr (KED)  | 4.381 ppb             |                   |
| 89Y (KED)   | 39.239 %              |                   |
| 107Ag (KED) | 0.021 ppb             |                   |
| 114Cd (KED) | 0.015 ppb             |                   |
| 115In (KED) | 37.599 %              |                   |
| 133Cs (KED) | 0.062 ppb             |                   |
| 138Ba (KED) | 3.277 ppb             |                   |
| 139La (KED) | 0.245 ppb             |                   |
| 140Ce (KED) | 0.502 ppb             |                   |
| 141Pr (KED) | 0.059 ppb             |                   |
| 142Nd (KED) | 0.330 ppb             |                   |
| 152Sm (KED) | 0.046 ppb             |                   |
| 153Eu (KED) | 0.007 ppb             |                   |
| 158Gd (KED) | 0.037 ppb             |                   |
| 159Tb (KED) | 36.459 %              |                   |
| 164Dy (KED) | 0.026 ppb             |                   |
| 166Er (KED) | 0.012 ppb             |                   |
| 169Tm (KED) | 0.002 ppb             |                   |
| 174Yb (KED) | 0.011 ppb             |                   |
| 175Lu (KED) | -0.012 ppb            |                   |
| 205Tl (KED) | 0.006 ppb             |                   |
| 208Pb (KED) | 0.537 ppb             |                   |
| 209Bi (KED) | 37.425 %              |                   |
| 232Th (KED) | 0.085 ppb             |                   |
| 238U (KED)  | 0.037 ppb             |                   |

| Category   | Concentration average | Intensity average | Intensity RSD |
|------------|-----------------------|-------------------|---------------|
| 6Li (KED)  | 44.111 %              | 1,303 cps         |               |
| 9Be (KED)  | -0.007 ppb            | 0 cps             |               |
| 11B (KED)  | -2.436 ppb            | 283 cps           |               |
| 24Mg (KED) | 324.796 ppb           | 85,552 cps        |               |
| 27Al (KED) | 273.709 ppb           | 16,184 cps        |               |

# Comprehensive

11/4/2021 4:56:04 PM

| Category    | Concentration average | Intensity average | Intensity RSD |
|-------------|-----------------------|-------------------|---------------|
| 45Sc (KED)  | 40.492 %              | 21,876 cps        |               |
| 51V (KED)   | 0.538 ppb             | 2,130 cps         |               |
| 52Cr (KED)  | 1.056 ppb             | 6,602 cps         |               |
| 55Mn (KED)  | 8.191 ppb             | 24,240 cps        |               |
| 56Fe (KED)  | 320.046 ppb           | 1,752,766 cps     |               |
| 58Ni (KED)  | 1.867 ppb             | 13,501 cps        |               |
| 59Co (KED)  | 0.170 ppb             | 2,003 cps         |               |
| 63Cu (KED)  | 3.441 ppb             | 30,176 cps        |               |
| 64Zn (KED)  | 113.923 ppb           | 251,648 cps       |               |
| 69Ga (KED)  | 1.034 ppb             | 2,884 cps         |               |
| 75As (KED)  | 0.319 ppb             | 207 cps           |               |
| 80Se (KED)  | 4.782 ppb             | 1,417 cps         |               |
| 85Rb (KED)  | 0.846 ppb             | 2,067 cps         |               |
| 88Sr (KED)  | 4.381 ppb             | 14,866 cps        |               |
| 89Y (KED)   | 39.239 %              | 182,881 cps       |               |
| 107Ag (KED) | 0.021 ppb             | 473 cps           |               |
| 114Cd (KED) | 0.015 ppb             | 130 cps           |               |
| 115In (KED) | 37.599 %              | 312,012 cps       |               |
| 133Cs (KED) | 0.062 ppb             | 707 cps           |               |
| 138Ba (KED) | 3.277 ppb             | 51,055 cps        |               |
| 139La (KED) | 0.245 ppb             | 8,329 cps         |               |
| 140Ce (KED) | 0.502 ppb             | 22,874 cps        |               |
| 141Pr (KED) | 0.059 ppb             | 2,697 cps         |               |
| 142Nd (KED) | 0.330 ppb             | 6,095 cps         |               |
| 152Sm (KED) | 0.046 ppb             | 747 cps           |               |
| 153Eu (KED) | 0.007 ppb             | 237 cps           |               |
| 158Gd (KED) | 0.037 ppb             | 813 cps           |               |
| 159Tb (KED) | 36.459 %              | 1,571,454 cps     |               |
| 164Dy (KED) | 0.026 ppb             | 630 cps           |               |
| 166Er (KED) | 0.012 ppb             | 443 cps           |               |
| 169Tm (KED) | 0.002 ppb             | 197 cps           |               |
| 174Yb (KED) | 0.011 ppb             | 383 cps           |               |
| 175Lu (KED) | -0.012 ppb            | 5,935 cps         |               |
| 205Tl (KED) | 0.006 ppb             | 410 cps           |               |
| 208Pb (KED) | 0.537 ppb             | 27,931 cps        |               |
| 209Bi (KED) | 37.425 %              | 1,320,989 cps     |               |
| 232Th (KED) | 0.085 ppb             | 8,500 cps         |               |
| 238U (KED)  | 0.037 ppb             | 4,071 cps         |               |

## Sample Summary

Instrument ID: iCAP Q

Analysis index: 46

Analysis name: 264jian

Analysis started at: 11/4/2021 4:50:29 PM

User name: WINDOWS-UPCI4ER\Administrator

| Category    | Concentration average | Concentration RSD |
|-------------|-----------------------|-------------------|
| 6Li (KED)   | 43.547 %              |                   |
| 9Be (KED)   | -0.007 ppb            |                   |
| 11B (KED)   | -4.140 ppb            |                   |
| 24Mg (KED)  | 311.634 ppb           |                   |
| 27Al (KED)  | 321.690 ppb           |                   |
| 45Sc (KED)  | 42.273 %              |                   |
| 51V (KED)   | 0.671 ppb             |                   |
| 52Cr (KED)  | 0.788 ppb             |                   |
| 55Mn (KED)  | 9.604 ppb             |                   |
| 56Fe (KED)  | 385.976 ppb           |                   |
| 58Ni (KED)  | 2.604 ppb             |                   |
| 59Co (KED)  | 0.176 ppb             |                   |
| 63Cu (KED)  | 4.372 ppb             |                   |
| 64Zn (KED)  | 112.877 ppb           |                   |
| 69Ga (KED)  | 1.368 ppb             |                   |
| 75As (KED)  | 0.281 ppb             |                   |
| 80Se (KED)  | 4.553 ppb             |                   |
| 85Rb (KED)  | 1.529 ppb             |                   |
| 88Sr (KED)  | 4.082 ppb             |                   |
| 89Y (KED)   | 40.927 %              |                   |
| 107Ag (KED) | 0.022 ppb             |                   |
| 114Cd (KED) | 0.017 ppb             |                   |
| 115In (KED) | 39.035 %              |                   |
| 133Cs (KED) | 0.064 ppb             |                   |
| 138Ba (KED) | 4.559 ppb             |                   |
| 139La (KED) | 0.294 ppb             |                   |
| 140Ce (KED) | 0.587 ppb             |                   |
| 141Pr (KED) | 0.067 ppb             |                   |
| 142Nd (KED) | 0.362 ppb             |                   |
| 152Sm (KED) | 0.054 ppb             |                   |
| 153Eu (KED) | 0.010 ppb             |                   |
| 158Gd (KED) | 0.042 ppb             |                   |
| 159Tb (KED) | 37.232 %              |                   |
| 164Dy (KED) | 0.032 ppb             |                   |
| 166Er (KED) | 0.016 ppb             |                   |
| 169Tm (KED) | 0.002 ppb             |                   |
| 174Yb (KED) | 0.017 ppb             |                   |
| 175Lu (KED) | -0.018 ppb            |                   |
| 205Tl (KED) | 0.007 ppb             |                   |
| 208Pb (KED) | 0.639 ppb             |                   |
| 209Bi (KED) | 38.542 %              |                   |
| 232Th (KED) | 0.090 ppb             |                   |
| 238U (KED)  | 0.029 ppb             |                   |

| Category   | Concentration average | Intensity average | Intensity RSD |
|------------|-----------------------|-------------------|---------------|
| 6Li (KED)  | 43.547 %              | 1,287 cps         |               |
| 9Be (KED)  | -0.007 ppb            | 0 cps             |               |
| 11B (KED)  | -4.140 ppb            | 220 cps           |               |
| 24Mg (KED) | 311.634 ppb           | 81,039 cps        |               |
| 27Al (KED) | 321.690 ppb           | 19,849 cps        |               |

# Comprehensive

11/4/2021 4:56:04 PM

| Category    | Concentration average | Intensity average | Intensity RSD |
|-------------|-----------------------|-------------------|---------------|
| 45Sc (KED)  | 42.273 %              | 22,838 cps        |               |
| 51V (KED)   | 0.671 ppb             | 2,774 cps         |               |
| 52Cr (KED)  | 0.788 ppb             | 5,154 cps         |               |
| 55Mn (KED)  | 9.604 ppb             | 29,669 cps        |               |
| 56Fe (KED)  | 385.976 ppb           | 2,206,573 cps     |               |
| 58Ni (KED)  | 2.604 ppb             | 19,602 cps        |               |
| 59Co (KED)  | 0.176 ppb             | 2,160 cps         |               |
| 63Cu (KED)  | 4.372 ppb             | 39,930 cps        |               |
| 64Zn (KED)  | 112.877 ppb           | 260,076 cps       |               |
| 69Ga (KED)  | 1.368 ppb             | 3,967 cps         |               |
| 75As (KED)  | 0.281 ppb             | 190 cps           |               |
| 80Se (KED)  | 4.553 ppb             | 1,433 cps         |               |
| 85Rb (KED)  | 1.529 ppb             | 3,867 cps         |               |
| 88Sr (KED)  | 4.082 ppb             | 14,448 cps        |               |
| 89Y (KED)   | 40.927 %              | 190,748 cps       |               |
| 107Ag (KED) | 0.022 ppb             | 513 cps           |               |
| 114Cd (KED) | 0.017 ppb             | 147 cps           |               |
| 115In (KED) | 39.035 %              | 323,930 cps       |               |
| 133Cs (KED) | 0.064 ppb             | 757 cps           |               |
| 138Ba (KED) | 4.559 ppb             | 72,306 cps        |               |
| 139La (KED) | 0.294 ppb             | 10,221 cps        |               |
| 140Ce (KED) | 0.587 ppb             | 27,276 cps        |               |
| 141Pr (KED) | 0.067 ppb             | 3,150 cps         |               |
| 142Nd (KED) | 0.362 ppb             | 6,835 cps         |               |
| 152Sm (KED) | 0.054 ppb             | 880 cps           |               |
| 153Eu (KED) | 0.010 ppb             | 337 cps           |               |
| 158Gd (KED) | 0.042 ppb             | 950 cps           |               |
| 159Tb (KED) | 37.232 %              | 1,604,772 cps     |               |
| 164Dy (KED) | 0.032 ppb             | 793 cps           |               |
| 166Er (KED) | 0.016 ppb             | 577 cps           |               |
| 169Tm (KED) | 0.002 ppb             | 213 cps           |               |
| 174Yb (KED) | 0.017 ppb             | 590 cps           |               |
| 175Lu (KED) | -0.018 ppb            | 5,731 cps         |               |
| 205Tl (KED) | 0.007 ppb             | 513 cps           |               |
| 208Pb (KED) | 0.639 ppb             | 33,930 cps        |               |
| 209Bi (KED) | 38.542 %              | 1,360,429 cps     |               |
| 232Th (KED) | 0.090 ppb             | 9,217 cps         |               |
| 238U (KED)  | 0.029 ppb             | 3,294 cps         |               |

## Sample Summary

Instrument ID: iCAP Q

Analysis index: 47

Analysis name: 17342jian

Analysis started at: 11/4/2021 4:52:17 PM

User name: WINDOWS-UPCI4ER\Administrator

| Category    | Concentration average | Concentration RSD |
|-------------|-----------------------|-------------------|
| 6Li (KED)   | 80.893 %              |                   |
| 9Be (KED)   | -0.007 ppb            |                   |
| 11B (KED)   | -2.942 ppb            |                   |
| 24Mg (KED)  | 153.410 ppb           |                   |
| 27Al (KED)  | 209.554 ppb           |                   |
| 45Sc (KED)  | 76.710 %              |                   |
| 51V (KED)   | 0.463 ppb             |                   |
| 52Cr (KED)  | 0.933 ppb             |                   |
| 55Mn (KED)  | 5.631 ppb             |                   |
| 56Fe (KED)  | 231.814 ppb           |                   |
| 58Ni (KED)  | 1.187 ppb             |                   |
| 59Co (KED)  | 0.106 ppb             |                   |
| 63Cu (KED)  | 2.571 ppb             |                   |
| 64Zn (KED)  | 59.146 ppb            |                   |
| 69Ga (KED)  | 0.673 ppb             |                   |
| 75As (KED)  | 0.176 ppb             |                   |
| 80Se (KED)  | 1.923 ppb             |                   |
| 85Rb (KED)  | 0.642 ppb             |                   |
| 88Sr (KED)  | 2.268 ppb             |                   |
| 89Y (KED)   | 73.250 %              |                   |
| 107Ag (KED) | 0.006 ppb             |                   |
| 114Cd (KED) | 0.012 ppb             |                   |
| 115In (KED) | 71.090 %              |                   |
| 133Cs (KED) | 0.038 ppb             |                   |
| 138Ba (KED) | 2.101 ppb             |                   |
| 139La (KED) | 0.194 ppb             |                   |
| 140Ce (KED) | 0.417 ppb             |                   |
| 141Pr (KED) | 0.044 ppb             |                   |
| 142Nd (KED) | 0.245 ppb             |                   |
| 152Sm (KED) | 0.035 ppb             |                   |
| 153Eu (KED) | 0.005 ppb             |                   |
| 158Gd (KED) | 0.032 ppb             |                   |
| 159Tb (KED) | 68.979 %              |                   |
| 164Dy (KED) | 0.022 ppb             |                   |
| 166Er (KED) | 0.009 ppb             |                   |
| 169Tm (KED) | 0.001 ppb             |                   |
| 174Yb (KED) | 0.009 ppb             |                   |
| 175Lu (KED) | -0.020 ppb            |                   |
| 205Tl (KED) | 0.003 ppb             |                   |
| 208Pb (KED) | 0.336 ppb             |                   |
| 209Bi (KED) | 70.127 %              |                   |
| 232Th (KED) | 0.061 ppb             |                   |
| 238U (KED)  | 0.016 ppb             |                   |

| Category   | Concentration average | Intensity average | Intensity RSD |
|------------|-----------------------|-------------------|---------------|
| 6Li (KED)  | 80.893 %              | 2,390 cps         |               |
| 9Be (KED)  | -0.007 ppb            | 0 cps             |               |
| 11B (KED)  | -2.942 ppb            | 487 cps           |               |
| 24Mg (KED) | 153.410 ppb           | 74,186 cps        |               |
| 27Al (KED) | 209.554 ppb           | 23,492 cps        |               |

# Comprehensive

11/4/2021 4:56:04 PM

| Category    | Concentration average | Intensity average | Intensity RSD |
|-------------|-----------------------|-------------------|---------------|
| 45Sc (KED)  | 76.710 %              | 41,442 cps        |               |
| 51V (KED)   | 0.463 ppb             | 3,474 cps         |               |
| 52Cr (KED)  | 0.933 ppb             | 11,055 cps        |               |
| 55Mn (KED)  | 5.631 ppb             | 31,587 cps        |               |
| 56Fe (KED)  | 231.814 ppb           | 2,405,530 cps     |               |
| 58Ni (KED)  | 1.187 ppb             | 16,367 cps        |               |
| 59Co (KED)  | 0.106 ppb             | 2,374 cps         |               |
| 63Cu (KED)  | 2.571 ppb             | 42,188 cps        |               |
| 64Zn (KED)  | 59.146 ppb            | 245,196 cps       |               |
| 69Ga (KED)  | 0.673 ppb             | 3,524 cps         |               |
| 75As (KED)  | 0.176 ppb             | 217 cps           |               |
| 80Se (KED)  | 1.923 ppb             | 1,657 cps         |               |
| 85Rb (KED)  | 0.642 ppb             | 2,940 cps         |               |
| 88Sr (KED)  | 2.268 ppb             | 14,408 cps        |               |
| 89Y (KED)   | 73.250 %              | 341,396 cps       |               |
| 107Ag (KED) | 0.006 ppb             | 270 cps           |               |
| 114Cd (KED) | 0.012 ppb             | 190 cps           |               |
| 115In (KED) | 71.090 %              | 589,934 cps       |               |
| 133Cs (KED) | 0.038 ppb             | 833 cps           |               |
| 138Ba (KED) | 2.101 ppb             | 62,289 cps        |               |
| 139La (KED) | 0.194 ppb             | 12,516 cps        |               |
| 140Ce (KED) | 0.417 ppb             | 35,979 cps        |               |
| 141Pr (KED) | 0.044 ppb             | 3,797 cps         |               |
| 142Nd (KED) | 0.245 ppb             | 8,566 cps         |               |
| 152Sm (KED) | 0.035 ppb             | 1,077 cps         |               |
| 153Eu (KED) | 0.005 ppb             | 337 cps           |               |
| 158Gd (KED) | 0.032 ppb             | 1,323 cps         |               |
| 159Tb (KED) | 68.979 %              | 2,973,166 cps     |               |
| 164Dy (KED) | 0.022 ppb             | 1,033 cps         |               |
| 166Er (KED) | 0.009 ppb             | 703 cps           |               |
| 169Tm (KED) | 0.001 ppb             | 270 cps           |               |
| 174Yb (KED) | 0.009 ppb             | 567 cps           |               |
| 175Lu (KED) | -0.020 ppb            | 10,411 cps        |               |
| 205Tl (KED) | 0.003 ppb             | 443 cps           |               |
| 208Pb (KED) | 0.336 ppb             | 33,839 cps        |               |
| 209Bi (KED) | 70.127 %              | 2,475,315 cps     |               |
| 232Th (KED) | 0.061 ppb             | 11,462 cps        |               |
| 238U (KED)  | 0.016 ppb             | 3,357 cps         |               |

## Sample Summary

Instrument ID: iCAP Q

Analysis index: 48

Analysis name: 17322jian

Analysis started at: 11/4/2021 4:54:04 PM

User name: WINDOWS-UPCI4ER\Administrator

| Category    | Concentration average | Concentration RSD |
|-------------|-----------------------|-------------------|
| 6Li (KED)   | 75.816 %              |                   |
| 9Be (KED)   | -0.007 ppb            |                   |
| 11B (KED)   | 15.257 ppb            |                   |
| 24Mg (KED)  | 211.413 ppb           |                   |
| 27Al (KED)  | 247.712 ppb           |                   |
| 45Sc (KED)  | 81.279 %              |                   |
| 51V (KED)   | 0.484 ppb             |                   |
| 52Cr (KED)  | 0.587 ppb             |                   |
| 55Mn (KED)  | 6.834 ppb             |                   |
| 56Fe (KED)  | 254.078 ppb           |                   |
| 58Ni (KED)  | 1.225 ppb             |                   |
| 59Co (KED)  | 0.111 ppb             |                   |
| 63Cu (KED)  | 2.406 ppb             |                   |
| 64Zn (KED)  | 60.943 ppb            |                   |
| 69Ga (KED)  | 0.678 ppb             |                   |
| 75As (KED)  | 0.187 ppb             |                   |
| 80Se (KED)  | 1.335 ppb             |                   |
| 85Rb (KED)  | 0.863 ppb             |                   |
| 88Sr (KED)  | 2.963 ppb             |                   |
| 89Y (KED)   | 75.419 %              |                   |
| 107Ag (KED) | 0.005 ppb             |                   |
| 114Cd (KED) | 0.013 ppb             |                   |
| 115In (KED) | 73.026 %              |                   |
| 133Cs (KED) | 0.056 ppb             |                   |
| 138Ba (KED) | 2.133 ppb             |                   |
| 139La (KED) | 0.225 ppb             |                   |
| 140Ce (KED) | 0.462 ppb             |                   |
| 141Pr (KED) | 0.050 ppb             |                   |
| 142Nd (KED) | 0.295 ppb             |                   |
| 152Sm (KED) | 0.039 ppb             |                   |
| 153Eu (KED) | 0.006 ppb             |                   |
| 158Gd (KED) | 0.032 ppb             |                   |
| 159Tb (KED) | 72.902 %              |                   |
| 164Dy (KED) | 0.023 ppb             |                   |
| 166Er (KED) | 0.010 ppb             |                   |
| 169Tm (KED) | 0.001 ppb             |                   |
| 174Yb (KED) | 0.011 ppb             |                   |
| 175Lu (KED) | -0.024 ppb            |                   |
| 205Tl (KED) | 0.004 ppb             |                   |
| 208Pb (KED) | 0.343 ppb             |                   |
| 209Bi (KED) | 72.115 %              |                   |
| 232Th (KED) | 0.071 ppb             |                   |
| 238U (KED)  | 0.019 ppb             |                   |

| Category   | Concentration average | Intensity average | Intensity RSD |
|------------|-----------------------|-------------------|---------------|
| 6Li (KED)  | 75.816 %              | 2,240 cps         |               |
| 9Be (KED)  | -0.007 ppb            | 0 cps             |               |
| 11B (KED)  | 15.257 ppb            | 1,567 cps         |               |
| 24Mg (KED) | 211.413 ppb           | 95,763 cps        |               |
| 27Al (KED) | 247.712 ppb           | 29,408 cps        |               |

# Comprehensive

11/4/2021 4:56:04 PM

| Category    | Concentration average | Intensity average | Intensity RSD |
|-------------|-----------------------|-------------------|---------------|
| 45Sc (KED)  | 81.279 %              | 43,910 cps        |               |
| 51V (KED)   | 0.484 ppb             | 3,847 cps         |               |
| 52Cr (KED)  | 0.587 ppb             | 7,402 cps         |               |
| 55Mn (KED)  | 6.834 ppb             | 40,606 cps        |               |
| 56Fe (KED)  | 254.078 ppb           | 2,793,437 cps     |               |
| 58Ni (KED)  | 1.225 ppb             | 17,879 cps        |               |
| 59Co (KED)  | 0.111 ppb             | 2,627 cps         |               |
| 63Cu (KED)  | 2.406 ppb             | 40,680 cps        |               |
| 64Zn (KED)  | 60.943 ppb            | 260,043 cps       |               |
| 69Ga (KED)  | 0.678 ppb             | 3,657 cps         |               |
| 75As (KED)  | 0.187 ppb             | 237 cps           |               |
| 80Se (KED)  | 1.335 ppb             | 1,497 cps         |               |
| 85Rb (KED)  | 0.863 ppb             | 4,047 cps         |               |
| 88Sr (KED)  | 2.963 ppb             | 19,355 cps        |               |
| 89Y (KED)   | 75.419 %              | 351,506 cps       |               |
| 107Ag (KED) | 0.005 ppb             | 220 cps           |               |
| 114Cd (KED) | 0.013 ppb             | 213 cps           |               |
| 115In (KED) | 73.026 %              | 606,004 cps       |               |
| 133Cs (KED) | 0.056 ppb             | 1,257 cps         |               |
| 138Ba (KED) | 2.133 ppb             | 66,822 cps        |               |
| 139La (KED) | 0.225 ppb             | 15,316 cps        |               |
| 140Ce (KED) | 0.462 ppb             | 42,051 cps        |               |
| 141Pr (KED) | 0.050 ppb             | 4,631 cps         |               |
| 142Nd (KED) | 0.295 ppb             | 10,911 cps        |               |
| 152Sm (KED) | 0.039 ppb             | 1,253 cps         |               |
| 153Eu (KED) | 0.006 ppb             | 427 cps           |               |
| 158Gd (KED) | 0.032 ppb             | 1,413 cps         |               |
| 159Tb (KED) | 72.902 %              | 3,142,242 cps     |               |
| 164Dy (KED) | 0.023 ppb             | 1,130 cps         |               |
| 166Er (KED) | 0.010 ppb             | 817 cps           |               |
| 169Tm (KED) | 0.001 ppb             | 267 cps           |               |
| 174Yb (KED) | 0.011 ppb             | 777 cps           |               |
| 175Lu (KED) | -0.024 ppb            | 10,538 cps        |               |
| 205Tl (KED) | 0.004 ppb             | 570 cps           |               |
| 208Pb (KED) | 0.343 ppb             | 35,514 cps        |               |
| 209Bi (KED) | 72.115 %              | 2,545,476 cps     |               |
| 232Th (KED) | 0.071 ppb             | 13,688 cps        |               |
| 238U (KED)  | 0.019 ppb             | 4,134 cps         |               |
